# Supplementary material for: Variable Rate of D-dimer Predicts Venous Thromboembolism in Postoperative Fracture Patients: A Single-Center Retrospective Cohort Study
Source: Research Square preprint supplement (doi:10.21203/rs.3.rs-7878480/v1), 2025-12-09
Supplement: Supplementary file 1 [file 0ba76cd2c7bb8e929e230ad9.xlsx]

## Sheet: Sheet1
骨折+血栓
序号	出院科室	入院日期	出院日期	病案号	病人	性别	年龄	主诊断	非主诊断	转归	主任	主治	住院	手术
					姓名					情况	医师	医师	医师	名称
1	C03眼科口腔	2023-03-18	2023-03-22	3345550	程爱香	女	65Y	腰椎骨折L1	腰椎间盘突出;高血压病;骨质疏松;脂肪肝;下肢静脉血栓形成	治愈	林焱	田乃锋	田乃锋	腰椎骨折球囊扩张成形术;经皮椎骨成形术
2	C03眼科口腔	2023-07-02	2023-07-08	3389218	林宏前	男	67Y	胸椎骨折	腰椎滑脱;骨质疏松，其他的;下肢静脉血栓形成;2型糖尿病;胸椎退行性病变;腰椎退行性病变;后天性肾囊肿;肾结石;前列腺增生;前列腺结石;下肢动脉粥样硬化;腰椎间盘突出;眼疲劳	治愈	徐晖	田乃锋	周凯亮	经皮椎骨成形术;腰椎骨折球囊扩张成形术
3	C03眼科口腔	2023-08-06	2023-08-12	3404865	王杨翠	女	53Y	桡骨头骨折	肱骨外髁骨折;肘关节骨折;下肢动脉粥样硬化;下肢静脉血栓形成;脂肪肝;子宫平滑肌瘤;宫颈囊肿	治愈	黄俊武	余贤斌	郑文浩	关节软骨修复术;桡骨骨折切开复位钢板内固定术
4	C03眼科口腔	2023-08-03	2023-08-14	3406092	厉小华	女	73Y	内踝骨折	腓骨骨折;踝关节积液;肺部感染;支气管扩张(症);下肢静脉血栓形成;膝关节退行性病变;室性自搏	好转	翁益民	翁益民	项光恒
5	C03眼科口腔	2023-09-02	2023-09-11	3418221	王彩领	女	63Y	胫骨平台骨折	膝半月板撕裂;膝关节十字韧带损伤;头皮血肿;特发性(原发性)高血压;肝胆管结石;肾结石;老年性心脏瓣膜病;下肢静脉血栓形成;肝钙化灶;腰椎退行性病变;肝胆管扩张;脑萎缩;膝关节副韧带扭伤	治愈	赵友明	柯陈荣	219048	股骨骨折切开复位螺钉内固定术;胫骨植骨术;关节镜膝关节副韧带修补术;胫骨骨折切开复位钢板内固定术
6	C03眼科口腔	2023-12-01	2023-12-13	3457825	叶秀珠	女	77Y	踝关节骨折	特发性(原发性)高血压;静脉血栓形成	好转	翁益民	翁益民	王特	踝关节骨折切开复位钢板内固定术;骨空隙骨水泥填充术
7	C03眼科口腔	2023-12-18	2023-12-24	3461823	张春萍	女	62Y	取除骨折内固定装置	脂肪肝;肾结石;下腔静脉血栓形成;糖尿病;脊柱侧弯;特发性肺纤维化	其他	翁益民	翁益民	王特	肱骨内固定装置去除术
8	C03眼科口腔	2023-12-21	2023-12-30	3464731	张银水	男	65Y	跖骨基底骨折	肺恶性肿瘤;2型糖尿病;慢性肾炎;骨折术后;抑郁发作;孤立性肺结节;肺钙化;后天性肾囊肿;脂肪肝;前列腺增生;肺炎;下肢静脉肌间血栓形成;下肢静脉曲张;主动脉钙化;冠状动脉粥样硬化	治愈	赵友明	柯陈荣	汪吉棋	跖骨骨折切开复位钢针内固定术;关节软骨修复术;石膏托固定术
9	C04综合病房	2023-03-22	2023-04-04	3350688	谷建德	男	59Y	创伤性脾破裂	下肢动脉粥样硬化;静脉栓塞和血栓形成;腰椎退行性病变;腹腔积血;肋骨骨折;肺部感染;支气管扩张;陈旧性肺结核	治愈	王飞海	周磊	218360	脾切开术;腹腔穿刺引流术
10	C04综合病房	2023-05-18	2023-05-30	3373148	陈招翠	女	75Y	脓毒性休克	肾结石;下肢动脉粥样硬化;骨折治疗后恢复期;腔隙性脑梗死;急性坏疽性胆囊炎;急性弥漫性腹膜炎;麻痹性肠梗阻;胸腔积液;下肢静脉血栓形成;低钾血症	治愈	王飞海	周磊	潘传孟	胆囊切除术;腹腔冲洗检查
11	C04综合病房	2023-06-06	2023-06-20	3381562	杨学开	男	79Y	脾损伤	锁骨骨折;胸椎骨折;前列腺增生;脂肪肝;胸腔积液;下肢静脉血栓形成;胸部浅表损伤;后天性肾囊肿;肾结石;肋骨多处骨折;下肢动脉粥样硬化;腹腔积血;肺挫伤	治愈	倪仲琳	黄和	姚志超
12	C04综合病房	2023-08-29	2023-09-11	3418306	徐登良	男	56Y	急性坏疽性阑尾炎伴穿孔伴局限性腹膜炎	下肢静脉肌间血栓形成;特发性(原发性)高血压;男性盆腔炎;后天性肾囊肿;骨折不连接\[假关节\];手术后状态，其他特指的;下肢动脉粥样硬化	治愈	倪仲琳	黄和	姚志超	腹腔穿刺引流术;腹腔脓肿切开引流术;阑尾切除术
13	C04综合病房	2023-09-19	2023-10-08	3428754	李官成	男	60Y	手术后伤口裂开	多处挫伤;耻骨骨折;髂骨骨折;骶骨骨折;骨盆骨折;下肢静脉血栓形成;肠系膜出血;肠系膜裂伤;头皮开放性伤口	治愈	吴伟军	吴伟军	219152
14	C04综合病房	2023-10-03	2023-10-31	3439037	徐文才	男	67Y	急性梗阻性胆管炎	胆囊结石;胆总管结石;脂肪肝;腹腔积液;癫痫;脑外伤后综合征;下肢动脉粥样硬化;下肢静脉血栓形成;陈旧性锁骨骨折;腹股沟斜疝;胸腔积液;急性胆囊炎	好转	杨越涛	王奕庚	徐训政	胆道镜检查术;胆总管切开取石术;腹腔镜下胆囊切除术;胆管引流术
15	C04综合病房	2023-10-15	2023-11-29	3451829	林文松	男	82Y	急性胃溃疡伴有穿孔	呼吸心跳骤停;脓毒性休克;多脏器功能衰竭;急性腹膜炎;操作后的感染，不可归类在他处者;手术后切口感染;胆汁淤积性肝炎;肺部感染;急性心肌梗死;髌骨骨折;下肢静脉血栓形成;肠梗阻;心房颤动;心律失常;窦性静止	死亡	倪仲琳	黄和	姚志超	全胃切除伴食管空肠吻合术;胃溃疡穿孔修补术;股动脉造影;股动脉栓塞术;下肢静脉滤器置入术;腹腔动脉造影
16	C04综合病房	2023-12-04	2023-12-21	3461070	王瑞业	男	80Y	股骨骨折	腰椎骨折;腹股沟直疝嵌顿;特发性(原发性)高血压;脑梗死后遗症;中度贫血;脂肪肝;后天性肾囊肿;多发性脑梗死;老年性脑萎缩;肺部感染;胸腔积液;主动脉钙化;下肢静脉血栓形成;脑内出血	治愈	倪仲琳	黄和	姚志超	股骨骨折闭合复位髓内针内固定术;单侧腹股沟直疝无张力修补术
17	C05疼痛科	2023-02-11	2023-02-18	3332237	王莲英	女	77Y	骨质疏松伴病理性骨折	下肢动脉粥样硬化;下肢静脉血栓形成;高血压病	好转	占恭豪	王佩芳	田心毅
18	C05疼痛科	2023-03-18	2023-03-25	3346193	蔡娇妹	女	93Y	腰椎间盘突出	骨质疏松伴病理性骨折;高血压病;2型糖尿病;股骨粗隆间骨折;骶骨骨折;腰椎骨折;下肢静脉血栓形成	好转	占恭豪	王佩芳	田心毅
19	C05疼痛科	2023-04-22	2023-05-09	3364297	娄秀兰	女	82Y	骨质疏松伴病理性骨折	下肢静脉血栓形成;类风湿性关节炎;肺结节;高血压病;2型糖尿病	治愈	占恭豪	占恭豪	黄茜茜
20	C05疼痛科	2023-07-01	2023-07-05	3388157	沙光荣	男	67Y	静脉血栓形成	脊柱压缩性骨折;高血压;2型糖尿病	未愈	占恭豪	占恭豪	黄茜茜
21	C05疼痛科	2023-09-16	2023-09-21	3422314	夏美凤	女	74Y	骨质疏松伴有病理性骨折	腰椎骨折L3;高血压;多发性肝囊肿;后天性肾囊肿;下肢动脉粥样硬化;下肢静脉血栓形成	好转	占恭豪	占恭豪	田心毅
22	C05疼痛科	2023-11-25	2023-12-02	3452677	丁珠凤	女	77Y	胸椎压缩性骨折	骨质疏松;腰椎退行性病变;胸椎退行性病变;脊柱侧弯;高血压;下肢静脉血栓形成;后天性肾囊肿;胆管扩张;慢性细支气管炎	治愈	田乃锋	倪文飞	万峻莱	胸椎骨折球囊扩张成形术
23	C05疼痛科	2023-09-23	2023-12-04	3453755	林志翔	男	67Y	放射治疗疗程	为肿瘤化学治疗疗程;食管恶性肿瘤;肺栓塞;静脉血栓形成;粒细胞缺乏;肺部感染;后天性肾囊肿;肝囊肿;陈旧性肋骨骨折;腰椎间盘突出	好转	吴剑	吴剑	周盈盈2	静脉注射化疗药物;静脉注射化疗药物;静脉注射化疗药物;静脉注射化疗药物;静脉注射化疗药物;静脉注射化疗药物
24	C06肿瘤放化疗、神经康复	2022-12-06	2023-02-02	3327683	黄洁	女	55Y	创伤性蛛网膜下腔出血	创伤性心包积血;心脏特指损伤;创伤性血气胸;肺挫伤;胸部损伤;骶骨骨折;髋臼骨折;多发性肋骨骨折;骨盆骨折;腰骶神经根损伤;胫腓骨下端骨折;关节僵硬;下肢静脉血栓形成;亚临床甲状腺功能减退症;肺部感染;泌尿道感染;耻骨骨折;失血性休克	好转	刘宝华	商萍	覃燕青	心包穿刺术;胸腔闭式引流术;髂内动脉栓塞术;关节软骨修复术;胫骨植骨术;髂骨取骨术;胫骨骨折切开复位钢板内固定术;水泥间隔物置入术;踝关节融合术;踝关节骨折切开复位钢板内固定术;骨盆骨折切开复位螺钉内固定术;下腔静脉滤器置入术;股静脉穿刺术
25	C06肿瘤放化疗、神经康复	2022-10-12	2023-02-15	3295619	刘建国	男	52Y	颈椎骨折	肺挫伤;高血压病;运动障碍;由于活动能力降低而需要帮助;颈部脊髓特指损伤;肺部感染;泌尿道感染;多发性肋骨骨折;肩胛骨骨折;锁骨骨折;下肢静脉血栓形成;肝功能异常;低钠血症;肺不张;皮肤裂伤;胸腔积液	好转	刘宝华	商萍	吕德钊	颈椎植骨术;支气管镜下肺泡灌洗术（BAL）;暂时性气管切开术;颈椎脱位切开复位内固定术
26	C06肿瘤放化疗、神经康复	2023-02-10	2023-03-05	3338478	黄洁	女	55Y	骨盆骨折	乙型肝炎小三阳;手术后伤口愈合不良;腰骶部脊髓神经丛损伤;下肢静脉血栓形成;肝功能异常;创伤性心包积血;创伤性血气胸;肺挫伤;亚临床甲状腺功能减退症;运动障碍;骨折治疗后恢复期;髋关节僵硬;开放性胸部损伤;多发性肋骨骨折;心脏特指损伤	好转	刘宝华	商萍	覃燕青
27	C06肿瘤放化疗、神经康复	2023-03-15	2023-04-13	3353889	杨崇禧	男	85Y	肱骨外科颈骨折	甲状腺结节;轻度认知障碍;硬脑膜下积液;肺大泡;肺部感染;肺肿物;肾衰竭;膝关节僵硬;肝功能异常;真菌感染;2型糖尿病;由于活动能力降低而需要帮助;吞咽困难;静脉栓塞和血栓形成	好转	刘宝华	商萍	胡晓晓
28	C06肿瘤放化疗、神经康复	2023-07-09	2023-07-24	3396444	黄志花	女	65Y	放射治疗疗程	恶性肿瘤靶向治疗;胃间质细胞瘤;颈动脉硬化;下肢动脉粥样硬化;慢性龈炎;淋巴结继发恶性肿瘤;骨折治疗后恢复期;下肢静脉肌间血栓形成	好转	陈文俊	陈文俊	陈文俊
29	C06肿瘤放化疗、神经康复	2023-09-01	2023-10-11	3429367	夏祖良	男	61Y	硬膜下血肿	肺部感染;消化道出血;低钾血症;脂肪肝;静脉血栓形成;上肢浅表损伤;涉及使用康复操作的医疗;多发性大脑挫裂伤;运动障碍;特定性运动功能发育障碍;轻度认知障碍;言语障碍;进食障碍;硬脑膜下积液;创伤性蛛网膜下腔出血;交通性脑积水;肋骨骨折	好转	刘宝华	商萍	胡晓晓	开颅探查术;颅骨去骨瓣减压术;日常生活动作训练;语言障碍训练
30	C09肛肠科	2023-11-16	2023-11-23	3449009	方祥枝	男	50Y	股骨干骨折	高血压;下肢静脉血栓形成	好转	冯永增	冯永增		股骨骨折闭合复位螺钉内固定术
31	C10感染内科	2023-03-05	2023-04-01	3348954	张祖富	男	56Y	颈椎多处骨折	肺结节;下肢静脉血栓形成;肺部感染;泌尿道感染;颈部脊髓损伤;铜绿假单胞菌败血症	好转	诸葛璐	李杰	吴佐罗	前柱其他颈融合，前路法;后柱其他颈融合，后路法
32	C10感染内科	2023-04-15	2023-04-24	3358194	张连英	女	49Y	淋巴管炎	纵隔肿物;陈旧性距骨骨折;肾结石;下肢动脉粥样硬化;静脉栓塞和血栓形成;高血压病;特指糖尿病伴肾并发症;2型糖尿病性周围神经病;2型糖尿病性视网膜病变;陈旧性胫骨骨折;下肢皮肤感染	好转	周光耀	方佩佩2	林秀珍
33	C11肾内科	2023-01-17	2023-01-29	3325453	徐学闹	男	53Y	2型糖尿病性肾病	肺气肿;前列腺增生;下肢动脉粥样硬化;颈动脉硬化;膝关节积液;后天性肾囊肿;慢性肾脏病5期;继发性贫血;高钾血症;高磷酸盐血症;陈旧性胫骨骨折;下肢静脉血栓形成;急性上呼吸道感染;高血压病;腔隙性脑梗死	好转	李占园	陈琰	徐晓燕2
34	C11肾内科	2023-02-21	2023-03-11	3340665	徐学闹	男	53Y	2型糖尿病性肾病	后天性肾囊肿;慢性肾脏病5期;颈动脉硬化;下肢动脉粥样硬化;膝关节积液;血液透析;腔隙性脑梗死;高血压病;陈旧性胫骨骨折;前列腺增生;肺气肿;下肢静脉血栓形成	好转	李占园	陈琰	黄文文	为肾透析的动静脉造瘘术
35	C11肾内科	2023-03-12	2023-03-20	3344652	陈云	女	47Y	多发性大动脉炎	慢性肾衰竭;颈动脉闭塞和狭窄;肾性贫血;肾血管性高血压;陈旧性肋骨骨折;肝功能异常;肾萎缩;下肢深静脉血栓形成;腹主动脉狭窄;高脂血症	好转	周志宏	张益前	廖秋眉
36	C11肾内科	2023-04-25	2023-04-26	3359518	陈云	女	48Y	多发性大动脉炎	慢性肾衰竭;颈动脉硬化;腹主动脉粥样硬化;轻度贫血;肾血管性高血压;肋骨骨折;肾萎缩;下肢深静脉血栓形成;高脂血症;特指手术后状态	好转	周志宏	张益前	廖秋眉
37	C11肾内科	2023-05-29	2023-06-11	3377397	黄定妹	女	81Y	导管相关性感染	慢性肾脏病5期;颈动脉硬化;闭塞性周围动脉粥样硬化;下肢动脉粥样硬化;膝关节病;血液透析;具有心脏起搏器;骨折治疗后恢复期;高血压病;肝硬化;肋骨骨折;骨质疏松;下肢静脉血栓形成	好转	李占园	陈琰	徐晓燕2
38	C11肾内科	2023-06-25	2023-06-26	3384137	陈云	女	48Y	大动脉炎	慢性肾功能不全;手术后状态，其他特指的;肾挛缩;动脉的动脉粥样硬化，其他的;肾性贫血;肾血管性高血压;陈旧性肋骨骨折;下肢深静脉血栓形成;腹主动脉狭窄;高脂血症	好转	陈辉乐	陈辉乐	黄文文
39	C11肾内科	2023-07-29	2023-07-30	3399361	陈云	女	48Y	大动脉炎	肾性高血压;手术后状态，其他特指的;陈旧性肋骨骨折;高脂血症;下肢深静脉血栓形成;颈动脉硬化;腹主动脉粥样硬化;肾动脉狭窄;肾性贫血;肾挛缩;慢性肾功能不全	好转	陈辉乐	陈辉乐	黄文文
40	C11肾内科	2023-08-27	2023-08-28	3412570	陈云	女	48Y	大动脉炎	腹主动脉粥样硬化;手术后状态，其他特指的;骨折治疗后恢复期;颈动脉硬化;下肢深静脉血栓形成;高脂血症;肾血管性高血压;慢性肾功能不全;肾挛缩;肾性贫血	好转	陈辉乐	陈辉乐	庄芝芝
41	C11肾内科	2023-11-14	2023-11-30	3452059	王美英	女	76Y	人工动静脉瘘血栓形成	高血压性肾病;血液透析;慢性胆囊炎;甲状腺功能减退症，其他特指的;痛风;骨质疏松;腰椎压缩性骨折;多发性脑梗死;高血压	治愈	毛朝鸣	赵艳玲	施珍	动静脉造瘘后球囊扩张(用于肾透析);下肢静脉造影;下肢动脉溶栓术;动静脉造瘘后球囊扩张(用于肾透析);下肢静脉置管溶栓术;下肢静脉造影
42	D06(ICU)	2022-12-15	2023-01-02	3314724	郑梅妹	女	90Y	重症肺炎	急性肾衰竭;心功能不全;股骨颈骨折;2型糖尿病;中度贫血;下肢静脉血栓形成;下肢假性动脉瘤;呼吸衰竭	未愈	程碧环	陈如杰	陈如杰	人工股骨头置换术;血液净化;髋关节滑膜切除术;支气管镜下肺泡灌洗术（BAL）;气管插管
43	D06(ICU)	2023-03-26	2023-04-02	3349824	王哲益	男	62Y	创伤性硬膜下出血	肺部感染;下肢静脉血栓形成;后天性肾囊肿;急性肾衰竭;胆囊结石;多发性肝囊肿;多处挫伤;头皮血肿;肺挫伤;创伤性脑疝;创伤性蛛网膜下腔出血;脑挫伤;跖骨骨折;锁骨骨折;肋骨骨折;颞骨骨折;枕骨骨折;额骨骨折;肝功能异常	未愈	庄荣	庄荣	傅蓓蓓	呼吸机治疗[大于等于96小时];连续性肾脏替代治疗[CRRT];颅内血肿清除术;颅骨钻孔减压术
44	D06(ICU)	2023-09-06	2023-09-16	3420242	郭新芳	男	65Y	创伤性蛛网膜下腔出血	创伤性硬膜下出血;颞骨骨折;创伤性湿肺;肺部感染;下肢静脉血栓形成;慢性乙型病毒性肝炎;头皮挫伤	未愈	庄荣	林孟相	林孟相	颅内血肿清除术;颅骨去骨瓣减压术
45	D06(ICU)	2023-12-07	2023-12-25	3463029	李金蕊	女	80Y	脓毒性休克	重症肺炎;呼吸衰竭;急性肾衰竭;急性呼吸窘迫综合征;肠梗阻;股骨粗隆间骨折;肾上腺皮质功能减退症，其他和未特指的;胸腔积液;下肢静脉血栓形成;骨质疏松;手术后状态，其他特指的	未愈	龚裕强	谢媚媚	谢媚媚	股骨骨折闭合复位髓内针内固定术;下腔静脉造影;气管内插管;股静脉穿刺置管术;连续性肾脏替代治疗[CRRT];呼吸机治疗[大于等于96小时];股骨骨折闭合复位术
46	D07儿童骨科、骨盆外科	2022-12-18	2023-01-02	3314414	陈德西	男	59Y	髌骨骨折	后天性肾囊肿;距骨骨折;胫距关节脱位;跖骨骨折;跟骨骨折;头皮开放性伤口;下肢静脉血栓形成;脂肪肝;胆总管结石;肾结石	好转	孔建中	陈墨川	方文来	髌骨骨折切开复位张力带钢丝内固定术;跖骨骨折切开复位钢针内固定术;跗骨骨折切开复位钢针内固定术
47	D07儿童骨科、骨盆外科	2022-12-24	2023-01-05	3315757	陈献忠	男	55Y	股骨干骨折	手舟状骨骨折;下肢静脉血栓形成;脂肪肝;肝钙化灶;桡骨下端骨折;腰椎骨折	好转	孔建中	陈墨川	方文来	桡骨骨折切开复位钢板内固定术;股骨骨折闭合复位髓内针内固定术;椎弓根钉内固定术
48	D07儿童骨科、骨盆外科	2022-12-28	2023-01-15	3319427	陈秀眉	女	93Y	股骨颈骨折	肾结石;肺结节;多发性脑梗死;肺部感染;冠状动脉粥样硬化性心脏病;下肢静脉血栓形成;肝囊肿	未愈	孔建中	陈墨川	方文来
49	D07儿童骨科、骨盆外科	2023-01-03	2023-01-15	3319436	邵国岳	男	82Y	股骨颈骨折	动脉瘤;下肢静脉血栓形成;多发性脑梗死;窦性心律失常;肝钙化灶	治愈	翁益民	翁益民	项光恒	人工双动股骨头置换术
50	D07儿童骨科、骨盆外科	2023-01-09	2023-01-16	3320034	叶彩凤	女	86Y	股骨颈骨折	高血压病;下肢静脉血栓形成;下肢动脉粥样硬化;特指肾盂积水;老年性心脏病	治愈	孔建中	陈墨川	方文来	人工双动股骨头置换术
51	D07儿童骨科、骨盆外科	2023-01-10	2023-01-18	3320841	蒋学兰	女	74Y	肱骨上端骨折	高血压病;脂肪肝;肝囊肿;颈动脉硬化;下肢静脉血栓形成;多个心瓣膜疾病	好转	孔建中	陈墨川	方文来	肱骨人工骨植骨术;肩袖修补术;肱骨骨折切开复位钢板内固定术
52	D07儿童骨科、骨盆外科	2023-01-23	2023-02-03	3328207	张夏香	女	81Y	闭合性胫骨平台骨折	半月板撕裂，近期的;膝关节特指部位扭伤;膝关节积液;下肢静脉血栓形成;原发性双侧膝关节病;肺萎陷;肺结节	治愈	翁益民	翁益民	项光恒	关节软骨修复术;胫骨骨折切开复位钢板内固定术
53	D07儿童骨科、骨盆外科	2023-01-30	2023-02-13	3330299	林传进	男	53Y	胸椎骨折	肺挫伤;头皮裂伤;下肢静脉血栓形成;腰椎间盘突出;肝囊肿;后天性肾囊肿;胆囊结石;乙型病毒性肝炎;肺结节;股骨干骨折;肩胛骨骨折;多发性肋骨骨折;颈椎间盘突出	好转	孔建中	陈墨川	方文来	椎弓根钉内固定术;2-3块椎骨融合;腰骶外侧横突融合术;下腔静脉滤器取出术;股静脉穿刺术;股骨骨折闭合复位髓内针内固定术;下腔静脉滤器置入术
54	D07儿童骨科、骨盆外科	2022-12-30	2023-02-18	3332115	周风雨	男	45Y	股骨粗隆间骨折	股骨干骨折;下肢特指深部脉管静脉炎和血栓性静脉炎;肱骨上端骨折;胫腓骨干骨折;胫骨下端骨折;跟骨骨折;脂肪肝;胆囊结石伴慢性胆囊炎	治愈	孔建中	方文来	陈墨川	下腔静脉滤器取出术;深静脉穿刺;股骨骨折切开复位髓内针内固定术;肩关节脱位闭合复位术;肩袖修补术;肱骨骨折切开复位螺钉内固定术;下腔静脉滤器置入术
55	D07儿童骨科、骨盆外科	2023-02-16	2023-02-25	3334910	李旭鲜	女	52Y	闭合性胫骨平台骨折	多发性膝关节损伤;下肢静脉血栓形成;心脏瓣膜病	好转	孔建中	陈墨川	方文来	膝后十字韧带重建术;关节软骨修复术;胫骨骨折切开复位钢板内固定术
56	D07儿童骨科、骨盆外科	2023-02-15	2023-02-26	3335382	姜宝珠	女	73Y	股骨颈骨折	骨质疏松;高血压病;脂肪肝;主动脉瓣关闭不全;颈动脉硬化;下肢动脉粥样硬化;下肢静脉血栓形成	好转	孔建中	陈墨川	方文来	陶瓷-陶瓷髋关节置换;全髋关节置换术
57	D07儿童骨科、骨盆外科	2023-02-23	2023-02-28	3336272	王炳华	男	64Y	腰椎骨折	骨质疏松;肝囊肿;脂肪肝;腰椎间盘突出;下肢静脉血栓形成;前列腺增生;前列腺结石	治愈	林焱	林焱	陈教想	腰椎骨折球囊扩张成形术;经皮穿刺椎体成形术
58	D07儿童骨科、骨盆外科	2023-02-21	2023-03-02	3337185	潘德有	男	61Y	髌骨骨折	胆囊息肉;肺部感染;肺结节;颈动脉硬化;下肢特指深部脉管静脉炎和血栓性静脉炎;胆囊结石;高血压病	好转	孔建中	陈墨川	方文来	股四头肌缝合术;关节软骨修复术;髌骨骨折切开复位张力带钢丝内固定术
59	D07儿童骨科、骨盆外科	2023-03-04	2023-03-11	3340554	何香娒	女	94Y	股骨粗隆间骨折	下肢动脉粥样硬化;老年性心脏瓣膜病;胆囊结石;盆腔肿物;肺气肿;下肢静脉血栓形成;肺结节	好转	孔建中	陈墨川	方文来	股骨骨折闭合性复位术不伴内固定;股骨使用外固定装置
60	D07儿童骨科、骨盆外科	2023-03-08	2023-03-16	3342956	林定花	女	93Y	股骨粗隆间骨折	肺特指疾患;心房颤动;凝血缺陷;肺部感染;下肢静脉血栓形成;高血压性心脏病	好转	孔建中	陈墨川	方文来	股骨骨折闭合性复位术伴内固定
61	D07儿童骨科、骨盆外科	2023-03-06	2023-03-20	3344474	蔡延地	男	82Y	开放性髌骨骨折	下肢动脉粥样硬化;下肢特指深部脉管静脉炎和血栓性静脉炎;主动脉瓣关闭不全;前列腺结石;前列腺增生;开放性膝部损伤	好转	孔建中	陈墨川	方文来	创面封闭式负压引流术（VSD);髌骨骨折切开复位张力带钢丝内固定术
62	D07儿童骨科、骨盆外科	2023-03-07	2023-03-20	3344749	陈剑西	女	85Y	股骨干骨折	后天性肾囊肿;短暂性脑缺血发作;非器质性失眠症;慢性上颌窦炎;静脉栓塞和血栓形成;骨折治疗后恢复期;腔隙性脑梗死;高血压病;耳聋;老年性脑萎缩;肝囊肿;脂肪肝;乳突炎;脑白质营养不良;低蛋白血症	治愈	翁益民	翁益民	项光恒	股骨骨折切开复位钢板内固定术
63	D07儿童骨科、骨盆外科	2023-02-11	2023-03-27	3347237	周祥媚	女	71Y	胫骨下端骨折	下肢深静脉血栓形成;贫血;低蛋白血症;多发性肋骨骨折;脂肪肝;下肢静脉血栓形成	治愈	翁益民	翁益民	项光恒	腓骨骨折切开复位钢板内固定术;髂骨切除术用作移植物;胫骨和腓骨移植术;下腔静脉滤器置入术;胫骨骨折切开复位钢板内固定术
64	D07儿童骨科、骨盆外科	2023-03-20	2023-04-02	3349588	周樟妹	女	76Y	股骨颈骨折	下肢静脉血栓形成;肝囊肿;胆囊息肉;肝胆管扩张;2型糖尿病;后天性肾囊肿;高血压病	治愈	翁益民	翁益民	项光恒	髋轴面，陶瓷与陶瓷;人工双动股骨头置换术
65	D07儿童骨科、骨盆外科	2023-03-18	2023-04-02	3349592	陈辉令	男	64Y	髌骨骨折	下肢静脉血栓形成;特指肾盂积水;尿潴留;前列腺增生;胆总管结石	好转	孔建中	陈墨川	方文来	髌骨骨折切开复位张力带钢丝内固定术;股四头肌缝合术;髌骨人工骨植骨术
66	D07儿童骨科、骨盆外科	2023-03-27	2023-04-02	3349600	谢月弟	女	72Y	跖骨骨折	主动脉瓣狭窄;膝关节副韧带损伤;半月板撕裂，近期的;2型糖尿病;脂肪肝;下肢静脉血栓形成	未愈	孔建中	陈墨川	方文来
67	D07儿童骨科、骨盆外科	2023-03-19	2023-04-03	3349998	蔡振林	男	61Y	踝骨闭合性骨折	下肢动脉粥样硬化;胫骨上端骨折;后天性肾囊肿;下肢特指深部脉管静脉炎和血栓性静脉炎;腰椎间盘突出;腰椎骨折;前列腺结石;脂肪肝	好转	孔建中	陈墨川	方文来	关节软骨修复术;踝关节骨折切开复位钢板内固定术;胫骨骨折切开复位钢板内固定术
68	D07儿童骨科、骨盆外科	2023-03-27	2023-04-11	3353024	金顺英	女	76Y	股骨颈骨折	下肢动脉粥样硬化;下肢特指深部脉管静脉炎和血栓性静脉炎;主动脉瓣及三尖瓣关闭不全;房性早搏;全身性硬皮病;肺部感染;哮喘;高脂血症	好转	孔建中	陈墨川	方文来	全髋关节置换;髋轴面，陶瓷与聚乙烯
69	D07儿童骨科、骨盆外科	2023-03-28	2023-04-13	3353905	林爱连	女	60Y	胫腓骨下端骨折	跗跖关节脱位;高弓足;老年性心脏瓣膜病;下腔静脉血栓形成	治愈	孔建中	孔建中	陈墨川	胫骨骨折切开复位钢板内固定术;腓骨骨折切开复位钢板内固定术
70	D07儿童骨科、骨盆外科	2023-04-15	2023-04-24	3358444	赵会星	男	52Y	股骨粗隆间骨折	交界性早搏;下肢静脉血栓形成;乙型肝炎小三阳;睾丸鞘膜积液	好转	孔建中	陈墨川	方文来	股骨骨折切开复位髓内针内固定术;股骨人工骨植骨术
71	D07儿童骨科、骨盆外科	2023-04-21	2023-04-28	3359930	张美花	女	72Y	股骨粗隆间骨折	下肢静脉血栓形成;下肢动脉粥样硬化;特指主动脉瓣疾患;脂肪肝	好转	孔建中	陈墨川	方文来	股骨骨折闭合复位螺钉内固定术;股骨人工骨植骨术
72	D07儿童骨科、骨盆外科	2023-04-21	2023-05-06	3362826	林志芳	男	70Y	胫骨上端骨折	前列腺结石;前列腺增生;胆囊息肉;肝病;下肢静脉血栓形成;室性早搏;踝挫伤;主动脉瓣关闭不全;肝占位性病变	好转	孔建中	陈墨川	方文来	胫骨骨折切开复位钢板内固定术;关节软骨修复术;胫骨人工骨植骨术
73	D07儿童骨科、骨盆外科	2023-04-28	2023-05-12	3365372	陈金钗	女	79Y	股骨粗隆间骨折	低蛋白血症;贫血;心脏扩大;下肢静脉血栓形成;特指主动脉瓣疾患	好转	翁益民	翁益民	项光恒	股骨骨折闭合复位髓内针内固定术
74	D07儿童骨科、骨盆外科	2023-05-03	2023-05-13	3365867	赵彩凤	女	60Y	股骨粗隆间骨折	胸椎骨折T11/T12;骶骨骨折;非风湿性三尖瓣关闭不全;原发性肺动脉高压;耻骨骨折;下肢静脉血栓形成;脂肪肝;腰椎骨折;腰椎间盘突出	好转	孔建中	陈墨川	方文来	股骨骨折切开复位钢板内固定术
75	D07儿童骨科、骨盆外科	2023-05-02	2023-05-15	3366650	徐娇梅	女	57Y	股骨粗隆间骨折	肾结石;肝硬化;脂肪肝;下肢静脉血栓形成	治愈	翁益民	翁益民	项光恒	股骨骨折闭合复位髓内针内固定术
76	D07儿童骨科、骨盆外科	2023-05-04	2023-05-18	3368130	周志宣	男	65Y	股骨外髁骨折	胫骨上端骨折;下肢动脉粥样硬化;前列腺结石;前列腺增生;脂肪肝;下肢静脉血栓形成	治愈	翁益民	翁益民	项光恒	下腔静脉滤器取出术;下肢静脉造影;股骨骨折切开复位钢板内固定术;下腔静脉滤器置入术
77	D07儿童骨科、骨盆外科	2023-05-13	2023-05-25	3370854	朱松兰	女	74Y	股骨颈骨折	胆囊结石;下肢静脉血栓形成;2型糖尿病;胸椎退行性病变;高血压	治愈	翁益民	翁益民	项光恒	人工股骨头置换术
78	D07儿童骨科、骨盆外科	2023-05-17	2023-05-29	3372581	赵岩灯	男	84Y	股骨粗隆间骨折	后天性肾囊肿;肾结石;颈动脉硬化;下肢动脉粥样硬化;主动脉瓣狭窄伴有关闭不全;高血压;静脉栓塞和血栓形成;原发性肺动脉高压;前列腺增生;肝囊肿;食管肿物;肺部感染;胸腔积液	好转	孔建中	陈墨川	方文来	股骨骨折闭合复位螺钉内固定术
79	D07儿童骨科、骨盆外科	2023-05-12	2023-05-31	3373227	陈耀祥	男	68Y	股骨干骨折	局灶性大脑挫裂伤;肾盂积水;肋骨多发性骨折伴第一肋骨骨折;下肢静脉血栓形成;前列腺结石;前列腺增生;胸腔积液;多处挫伤	好转	翁益民	翁益民	项光恒	股骨骨折闭合复位髓内针内固定术
80	D07儿童骨科、骨盆外科	2023-05-23	2023-06-03	3374347	李阿英	女	87Y	股骨粗隆间骨折	高血压;心房颤动;二尖瓣及主动脉瓣关闭不全;慢性支气管炎;下肢静脉血栓形成	治愈	孔建中	陈墨川	周呈伟	股骨骨折闭合复位螺钉内固定术
81	D07儿童骨科、骨盆外科	2023-05-24	2023-06-05	3375162	胡宝顺	男	74Y	腓骨骨折	孤立性肺结节;后天性肾囊肿;膝关节病;髋关节病;颅骨肿瘤;胆囊结石;多发性肝囊肿;二尖瓣及主动脉瓣关闭不全;头皮血肿;面部裂伤;肋骨骨折;前列腺结石;前列腺增生;肾钙化;肝钙化灶;下肢静脉血栓形成;主动脉钙化	治愈	翁益民	翁益民	项光恒	腓骨骨折切开复位髓内针内固定术
82	D07儿童骨科、骨盆外科	2023-05-29	2023-06-06	3375830	赵建平	男	45Y	股骨粗隆下骨折	头部的开放性伤口;桡骨下端骨折;下肢静脉血栓形成	治愈	孔建中	陈墨川	周呈伟	股骨骨折闭合复位髓内针内固定术;桡骨骨折切开复位钢板内固定术
83	D07儿童骨科、骨盆外科	2023-05-31	2023-06-14	3378720	林小夏	女	84Y	胫骨平台骨折	肺钙化;第二颈椎骨折;四根以上肋骨骨折不伴第一肋骨骨折;椎间盘突出;创伤性蛛网膜下腔出血;髌骨骨折;股骨粗隆间骨折;胸腔积液;下肢静脉血栓形成	治愈	孔建中	陈墨川	周呈伟	胫骨骨折切开复位钢板内固定术;髌骨骨折切开复位张力带钢丝内固定术;股骨骨折切开复位钢丝内固定术
84	D07儿童骨科、骨盆外科	2023-06-18	2023-06-26	3383980	杨阿善	女	84Y	股骨粗隆间骨折	特发性（原发性）高血压;下肢静脉血栓形成	治愈	孔建中	陈墨川	周呈伟	股骨骨折闭合复位螺钉内固定术
85	D07儿童骨科、骨盆外科	2023-06-20	2023-07-02	3386365	刘志澄	男	93Y	股骨粗隆间骨折	后天性肾囊肿;下肢静脉血栓形成;特发性（原发性）高血压;肘挫伤;二尖瓣及主动脉瓣关闭不全;脱髓鞘性脑病;窦性心动过缓;前列腺增生	好转	翁益民	翁益民	项光恒	股骨骨折闭合复位髓内针内固定术
86	D07儿童骨科、骨盆外科	2023-07-08	2023-07-17	3393568	高顺钦	男	82Y	股骨粗隆间骨折	脂肪肝;后天性肾囊肿;高血压;冠状动脉粥样硬化性心脏病;骨质疏松，其他的;下肢动脉粥样硬化;下肢静脉血栓形成	治愈	孔建中	陈墨川	周呈伟	股骨骨折闭合复位螺钉内固定术
87	D07儿童骨科、骨盆外科	2023-08-09	2023-08-20	3408870	周赛君	女	54Y	三踝骨折	手术后皮肤坏死;下肢静脉血栓形成;踝开放性伤口;拇趾骨折;踝关节脱位	治愈	孔建中	陈墨川	陈墨川	踝关节骨折切开复位钢板内固定术;踝脱位开放性复位术;关节软骨修复术
88	D07儿童骨科、骨盆外科	2023-08-20	2023-09-02	3414388	周汉仁	男	44Y	跟骨骨折	脂肪肝;下肢静脉血栓形成	治愈	孔建中	陈墨川	陈墨川	创面封闭式负压引流术（VSD);关节软骨修复术;跟骨骨折切开复位钢板内固定术
89	D07儿童骨科、骨盆外科	2023-09-02	2023-09-12	3418733	汤正华	男	87Y	股骨颈骨折	肝囊肿;胆囊胆固醇沉着症;前列腺增生;前列腺囊肿;支气管扩张(症);陈旧性肺结核;特发性(原发性)高血压;冠状动脉粥样硬化性心脏病;冠状动脉支架植入后状态;颈动脉硬化;下肢静脉血栓形成;脂肪肝	治愈	孔建中	陈墨川	陈墨川	髋轴面，陶瓷与聚乙烯;人工股骨头置换术
90	D07儿童骨科、骨盆外科	2023-09-22	2023-09-28	3425319	徐爱玉	女	81Y	股骨粗隆间骨折	颈动脉硬化;胆囊息肉;肺大疱;下肢静脉血栓形成	治愈	孔建中	陈墨川	陈墨川	股骨骨折闭合复位螺钉内固定术
91	D07儿童骨科、骨盆外科	2023-09-24	2023-10-02	3427109	陈彩球	女	87Y	股骨粗隆间骨折	特发性(原发性)高血压;慢性萎缩性胃炎;主动脉瓣疾患，其他的;肝囊肿;后天性肾囊肿;颈动脉硬化;下肢静脉血栓形成	治愈	孔建中	陈墨川	陈墨川	股骨骨折闭合复位螺钉内固定术
92	D07儿童骨科、骨盆外科	2023-10-04	2023-10-12	3430383	林逢朝	男	66Y	股骨粗隆间骨折	股骨粗隆下骨折;腰椎骨折L3;下肢深静脉血栓形成;肾结石;踝关节关节病	治愈	孔建中	陈墨川	陈墨川	腰椎骨折球囊扩张成形术;股骨人工骨植骨术;股骨骨折闭合复位螺钉内固定术
93	D07儿童骨科、骨盆外科	2023-09-21	2023-10-14	3431129	王赛姐	女	56Y	髂骨骨折	脂肪肝;下肢静脉血栓形成;多处挫伤;腰椎骨折	治愈	孔建中	陈墨川	陈墨川	髂骨骨折切开复位钢板内固定术;髂骨人工骨植骨术
94	D07儿童骨科、骨盆外科	2023-10-23	2023-10-30	3438117	黄彩娥	女	61Y	胫骨近端骨折	膝关节退行性病变;特发性(原发性)高血压;下肢静脉血栓形成;腰椎退行性病变	治愈	孔建中	陈墨川	陈墨川	关节软骨修复术;胫骨骨折切开复位螺钉内固定术
95	D07儿童骨科、骨盆外科	2023-10-24	2023-11-02	3439652	陈顺月	女	67Y	骨盆骨折	颈椎横突骨折;四根以上肋骨骨折不伴第一肋骨骨折;胸腔积液;头皮血肿;上颌窦炎;肝囊肿;下肢静脉血栓形成;抑郁发作	好转	翁益民	翁益民	王特	骨盆骨折闭合性复位术;盆骨外固定术;应用单平面外固定架;髂动脉造影
96	D07儿童骨科、骨盆外科	2023-10-23	2023-11-04	3440430	金顺英	女	76Y	股骨颈骨折	人工髋关节;哮喘;全身性硬皮病;特发性(原发性)高血压;肺气肿;肺部感染;肺肿物;下肢静脉血栓形成	治愈	孔建中	陈墨川	陈墨川	全髋关节置换;髋轴面，陶瓷与聚乙烯
97	D07儿童骨科、骨盆外科	2023-11-26	2023-12-08	3455281	陈彩英	女	68Y	骨盆骨折	肝挫伤;肋骨多处骨折;胸腔积液;肺挫伤;腹腔积液;下肢静脉血栓形成	好转	翁益民	翁益民	王特	骨盆骨折闭合性复位术;盆骨外固定术;应用单平面外固定架
98	D07儿童骨科、骨盆外科	2023-12-06	2023-12-17	3459206	王再钗	男	92Y	肱骨大结节骨折	肩胛骨骨折;肩关节脱位;前列腺增生;前列腺结石;下肢静脉血栓形成	治愈	孔建中	胡炜	陈墨川	肱骨骨折切开复位螺钉内固定术;肩袖修补术;肩关节镜下盂唇固定术
99	D07儿童骨科、骨盆外科	2023-12-07	2023-12-23	3461700	胡林丹	女	69Y	股骨颈骨折	掌骨骨折;下肢静脉血栓形成;脂肪肝;膝关节退行性病变	好转	翁益民	翁益民	王特	全髋关节置换;髋轴面，陶瓷与陶瓷;掌骨骨折闭合复位钢针内固定术
100	D07儿童骨科、骨盆外科	2023-12-24	2023-12-31	3465423	池菊娇	女	78Y	股骨髁上骨折	股骨干骨折;2型糖尿病;孤立性肺结节;膝关节退行性病变;下肢静脉血栓形成;低蛋白血症	治愈	孔建中	胡炜	陈墨川	股骨骨折切开复位螺钉内固定术
101	D08(骨病)	2023-02-06	2023-02-15	3331065	倪银娥	女	87Y	股骨粗隆间骨折	下肢动脉粥样硬化;下肢静脉血栓形成;肝囊肿;胆囊结石	治愈	薛恩兴	陈成旺	薛星河	股骨骨折闭合复位螺钉内固定术
102	D08(骨病)	2023-02-06	2023-02-20	3333118	何学波	男	77Y	插入矫形外科植入物后骨折	人工髋关节;2型糖尿病;下肢动脉粥样硬化;下肢特指深部脉管静脉炎和血栓性静脉炎;后天性肾囊肿;肾结石	治愈	薛恩兴	陈成旺	薛星河	下腔静脉滤器置入术;股静脉穿刺术;髋关节股骨假体翻修术
103	D08(骨病)	2023-02-13	2023-02-22	3334111	赵冬花	女	88Y	股骨颈骨折	下肢特指深部脉管静脉炎和血栓性静脉炎;肝钙化灶;后天性肾囊肿;2型糖尿病	治愈	胡月正	胡月正	218273	人工双动股骨头置换术
104	D08(骨病)	2023-02-25	2023-03-05	3338318	木玉钗	女	73Y	股骨颈骨折	静脉栓塞和血栓形成;胆囊结石;高血压病	治愈	张宇	陈成旺	薛星河	全髋关节置换术
105	D08(骨病)	2023-02-27	2023-03-05	3338322	朱碎玉	女	88Y	股骨颈骨折	静脉栓塞和血栓形成;脊柱侧弯;肝囊肿;肺结节	治愈	张宇	陈成旺	薛星河	人工双动股骨头置换术
106	D08(骨病)	2023-03-09	2023-03-18	3343596	梁桂芳	女	83Y	股骨粗隆间骨折	恶性肿瘤个人史;下肢静脉血栓形成;后天性肾囊肿;胆囊结石;高血压性心脏病;脂肪肝	治愈	潘孝云	杨阳	218273	股骨骨折闭合复位螺钉内固定术
107	D08(骨病)	2023-04-01	2023-04-08	3351791	张林华	女	52Y	膝关节十字韧带扭伤	腓骨骨折;下肢静脉血栓形成	治愈	薛恩兴	陈成旺	218273	关节镜膝关节前交叉韧带重建术
108	D08(骨病)	2023-03-29	2023-04-09	3352250	吴升益	男	73Y	原发性单侧髋关节病	下肢静脉血栓形成;后天性肾囊肿;高血压病;股骨颈骨折	治愈	张宇	陈成旺	218273	全髋关节置换;髋轴面，金属与聚乙烯
109	D08(骨病)	2023-04-16	2023-04-17	3355552	尤云坝	男	70Y	取除骨折内固定装置	由于其他和未特指原因而使病人决定不进行操作;后天性肾囊肿;前列腺结石;前列腺增生;下肢静脉血栓形成	其他	薛恩兴	陈成旺	陈道森
110	D08(骨病)	2023-04-22	2023-05-03	3361960	曾荣赵	男	71Y	股骨多处骨折	前列腺结石;前列腺增生;下肢静脉血栓形成	治愈	胡月正	柳海晓	许心弦	股骨骨折闭合复位螺钉内固定术
111	D08(骨病)	2023-05-01	2023-05-09	3364309	郑三娒	男	91Y	股骨粗隆间骨折	盆腔淋巴结肿大;高血压病;阴囊肿物;下肢静脉血栓形成	好转	张宇	陈成旺	陈道森	股骨骨折闭合复位螺钉内固定术
112	D08(骨病)	2023-05-20	2023-05-28	3371950	沈三玲	女	62Y	股骨颈骨折	桡骨下端骨折;胸腔积液;下肢静脉血栓形成	治愈	张宇	陈成旺	李振兴	全髋关节置换
113	D08(骨病)	2023-05-26	2023-06-04	3374853	郏彩英	女	58Y	膝的多处结构的损伤	股骨下端骨折;后天性肾囊肿;下肢动脉粥样硬化;原发性单侧膝关节病;膝关节积液;腓骨骨折;下肢静脉血栓形成;乙型病毒性肝炎	治愈	薛恩兴	陈成旺	陈道森	关节镜膝关节交叉韧带重建术;关节镜膝关节副韧带修补术
114	D08(骨病)	2023-06-24	2023-07-02	3386509	夏翠英	女	83Y	股骨颈骨折	高血压;下肢动脉粥样硬化;陈旧性肋骨骨折;肝囊肿;下肢静脉血栓形成	治愈	薛恩兴	陈成旺	李振兴	人工股骨头置换术
115	D08(骨病)	2023-07-10	2023-07-22	3395550	麻春叶	女	76Y	髌骨骨折	原发性单侧膝关节病;肝硬化;头皮血肿;高血压;腔隙性脑梗死;老年性脑萎缩;下肢静脉血栓形成	治愈	张宇	陈成旺	李振兴	髌骨骨折切开复位张力带钢丝内固定术;全部膝关节置换
116	D08(骨病)	2023-07-18	2023-07-29	3398743	刘翠林	女	67Y	肩袖肌腱损伤	脂肪肝;冈下肌肌腱损伤;肩胛下肌肌腱损伤;肩关节盂骨折;肩关节积液;复发性肩关节脱位;臂丛神经损伤;2型糖尿病;下肢静脉血栓形成	好转	薛恩兴	樊沛	李振兴	肩关节镜下肩袖修补术
117	D08(骨病)	2023-07-31	2023-08-19	3408297	刘建飞	女	51Y	胫骨平台骨折	人工髋关节;后天性肾囊肿;肾结石;下肢静脉血栓形成	治愈	张宇	陈成旺	林一木	胫骨骨折切开复位钢板内固定术
118	D08(骨病)	2023-08-30	2023-09-06	3416189	陈妹芳	女	53Y	半月板撕裂，近期的	膝关节多处韧带损伤;桡骨远端骨折;膝关节退行性病变;下肢静脉血栓形成	治愈	胡月正	柳海晓	许心弦	膝关节镜下半月板成形术
119	D08(骨病)	2023-08-30	2023-09-10	3417701	金贤忠	男	79Y	胫骨远端骨折伴腓骨骨折	在小腿水平的肌肉和肌腱的损伤;下肢静脉血栓形成;肾结石;前列腺增生;前列腺结石	治愈	洪建军	卢晓郎	219049	胫骨人工骨植骨术;胫骨骨折切开复位钢板内固定术
120	D08(骨病)	2023-08-28	2023-09-12	3418836	陈阿彩	女	82Y	胫骨平台骨折	下肢静脉血栓形成;食管裂孔疝;甲状腺结节;下肢烧伤;特发性(原发性)高血压;糖尿病;脂肪肝;胆囊结石;后天性肾囊肿	未愈	胡月正	柳海晓	许心弦	皮肤和皮下坏死组织切除清创术;创面封闭式负压引流术（VSD)
121	D08(骨病)	2023-09-09	2023-09-16	3419857	许松莲	女	74Y	腰椎骨折L3	椎间盘突出;腰椎退行性病变;下肢静脉血栓形成;高血压;脂肪肝;肾结石	治愈	田乃锋	田乃锋	周凯亮	腰椎骨折球囊扩张成形术;经皮椎骨成形术
122	D08(骨病)	2023-10-13	2023-10-19	3433661	郑莲花	女	63Y	股骨颈骨折	脂肪肝;下肢静脉血栓形成;子宫平滑肌瘤	治愈	张宇	陈成旺	林一木	髋轴面，陶瓷与聚乙烯;全髋关节置换
123	D08(骨病)	2023-10-14	2023-10-22	3434719	胡德安	女	80Y	股骨颈骨折	高血压;原发性甲状腺功能亢进症;甲状腺结节;下肢动脉粥样硬化;下肢静脉血栓形成;后天性肾囊肿;痴呆;人工髋关节;局灶性大脑挫裂伤;创伤性硬膜下出血;头皮血肿;多发性脑梗死	好转	张宇	张宇	陈道森	髋轴面，陶瓷与聚乙烯;人工股骨头置换术
124	D08(骨病)	2023-10-24	2023-10-28	3437423	俞传森	男	67Y	股骨颈骨折	前列腺结石;下肢静脉血栓形成;脂肪肝;肝囊肿;后天性肾囊肿;前列腺增生	未愈	胡月正	柳海晓	许心弦
125	D08(骨病)	2023-11-08	2023-11-10	3443233	廖宝弟	男	81Y	股骨粗隆间骨折	人工膝关节;慢性肾功能不全;肺部感染;全心衰竭;高血压;下肢静脉血栓形成;肝囊肿;后天性肾囊肿;前列腺结石;糖尿病	未愈	胡月正	余华晨	许心弦
126	D08(骨病)	2023-11-01	2023-11-12	3443924	俞传森	男	67Y	股骨颈骨折	下肢静脉血栓形成;下肢动脉粥样硬化	治愈	胡月正	柳海晓	许心弦	全髋关节置换;髋轴面，陶瓷与聚乙烯
127	D08(骨病)	2023-11-24	2023-12-09	3455713	叶贤芳	女	66Y	胸椎骨折T11/T12	腰椎峡部裂;腰椎间盘突出;肩袖损伤;锁骨骨折;下肢静脉血栓形成;肝囊肿;后天性肾囊肿;肾结石	治愈	薛恩兴	薛恩兴	余炜	肩关节镜下肩袖修补术;胸椎骨折球囊扩张成形术
128	D08(骨病)	2023-12-16	2023-12-23	3461781	林丙忠	男	71Y	膝关节前十字韧带损伤	膝半月板撕裂;腓骨骨折;髌骨骨折;肺占位性病变;胆囊结石;前列腺结石;下肢静脉血栓形成	治愈	潘孝云	杨阳	周玉龙	关节镜膝关节前交叉韧带重建术
129	D09(创伤1)	2022-12-13	2023-01-03	3314767	花小青	女	37Y	股骨粗隆间骨折	小腿开放性损伤;腓骨骨折;下肢静脉血栓形成;高血压病;抑郁症	治愈	陈龙	应晓洲	应晓洲	下腔静脉滤器置入术;股静脉穿刺术;皮肤缝合术;创面负压封闭引流[VSD];皮肤和皮下坏死组织切除清创术;股骨骨折闭合复位髓内针内固定术
130	D09(创伤1)	2022-12-13	2023-01-04	3315396	李素清	女	55Y	股骨颈骨折	面部软组织挫伤;锁骨骨折;肾结石;下肢静脉血栓形成;创伤性蛛网膜下腔出血;头皮血肿;肩回旋套肌腱损伤;肱二头肌长头肌腱炎;脑挫伤;腔隙性脑梗死	治愈	赵友明	余贤斌	柯陈荣	全髋关节置换术
131	D09(创伤1)	2023-01-03	2023-01-08	3316736	徐玉英	女	89Y	髋关节痛	髋挫伤;创伤性脊椎病;椎间盘膨隆;腰骶椎间盘突出;胸椎退行性病变;骨质疏松;高血压病;下肢静脉血栓形成;耻骨骨折	好转	杨雷	周一飞	218371
132	D09(创伤1)	2022-12-29	2023-01-10	3317316	陈素平	女	66Y	跟骨骨折	下肢静脉血栓形成;多发性肝囊肿;后天性肾囊肿	治愈	赵友明	余贤斌	柯陈荣	跟骨骨折切开复位钢针内固定术
133	D09(创伤1)	2023-01-14	2023-01-21	3322185	郑义方	男	68Y	锁骨骨折	下肢静脉血栓形成;静脉功能不全;房性早搏;后天性肾囊肿;前列腺增生;下肢静脉曲张;脑栓塞	治愈	赵友明	余贤斌	柯陈荣	锁骨骨折闭合复位钢针内固定术
134	D09(创伤1)	2023-01-18	2023-01-29	3325406	李凤香	女	80Y	股骨粗隆间骨折	糖尿病;老年性心脏病;静脉栓塞和血栓形成;脂肪肝;肝囊肿;老年性脑萎缩;肾结石	治愈	杨雷	周一飞	218371	股骨骨折闭合复位钢针内固定术
135	D09(创伤1)	2023-01-15	2023-01-29	3325407	林美兰	女	79Y	股骨颈骨折	下肢静脉血栓形成;肝钙化灶;后天性肾囊肿;肾结石;腔隙性脑梗死;老年性脑萎缩;帕金森病;痴呆;高血压病;老年性心脏病	治愈	杨雷	周一飞	218371	人工股骨头置换术
136	D09(创伤1)	2023-01-24	2023-02-03	3328354	余永芬	女	63Y	胫骨上端骨折	下肢静脉血栓形成;主动脉瓣关闭不全;二尖瓣及主动脉瓣关闭不全	治愈	陈龙	应晓洲	应晓洲	胫骨骨折切开复位钢板内固定术;关节软骨修复术;胫骨人工骨植骨术
137	D09(创伤1)	2023-02-07	2023-02-18	3332190	林士介	男	86Y	股骨颈骨折	心房颤动;心功能不全;静脉功能不全;股动脉血栓形成;肝囊肿;后天性肾囊肿;前列腺增生;肺肿物	治愈	赵友明	余贤斌	柯陈荣	髋关节滑膜切除术;全髋关节置换术
138	D09(创伤1)	2023-02-07	2023-02-18	3332217	卢小领	女	73Y	股骨特指部位骨折	肾结石;髌骨骨折;膝关节积液;膝关节病;下肢静脉血栓形成;心房颤动;心功能不全;脂肪肝;肝囊肿;胆囊结石	治愈	赵友明	余贤斌	柯陈荣	石膏绷带固定;股骨折骨术;关节软骨修复术;股骨骨折切开复位钢针内固定术;下腔静脉滤器置入术;股静脉穿刺术
139	D09(创伤1)	2023-03-01	2023-03-06	3338940	林阿庚	男	88Y	股骨粗隆间骨折	下肢静脉血栓形成	治愈	汤骏	吴剑彬	吴剑彬
140	D09(创伤1)	2023-02-22	2023-03-08	3339510	应夏祥	男	56Y	胫骨上端骨折	手舟状骨骨折;颈椎间盘突出;颈椎退行性病变;颈部脊髓损伤;前列腺结石;脂肪肝;下肢静脉血栓形成	治愈	赵友明	赵友明	柯陈荣	胫骨骨折切开复位钢板内固定术;股静脉穿刺术;下腔静脉滤器置入术;关节软骨修复术;胫骨植骨术
141	D09(创伤1)	2023-02-28	2023-03-08	3339543	邱爱绒	女	87Y	股骨粗隆间骨折	后天性肾囊肿;原发性单侧膝关节病;脂肪肝;下肢静脉血栓形成	治愈	陈龙	应晓洲	应晓洲	股骨骨折闭合复位髓内针内固定术
142	D09(创伤1)	2023-03-02	2023-03-09	3340159	麻秀善	女	70Y	跖骨骨折	后天性肾囊肿;肾结石;多发性脑梗死;腰椎间盘突出;外踝骨折;胸椎骨折;脂肪肝;下肢静脉血栓形成;脾囊肿;糖尿病	治愈	杨雷	周一飞	218371	跖骨骨折切开复位术
143	D09(创伤1)	2023-03-14	2023-04-01	3349101	郑海武	男	41Y	股骨干骨折	下肢静脉血栓形成	好转	汤骏	吴剑彬	吴剑彬	股骨骨折切开复位螺钉内固定术;股静脉穿刺术;下腔静脉滤器取出术;下肢静脉造影;下腔静脉滤器置入术
144	D09(创伤1)	2023-03-30	2023-04-04	3350661	吴献玉	男	70Y	股骨颈骨折	后天性肾囊肿;老年性心脏病;高血压病;老年性脑萎缩;下肢静脉血栓形成	治愈	杨雷	胡炜	218371	股骨骨折闭合复位髓内针内固定术
145	D09(创伤1)	2023-04-08	2023-04-14	3354037	胡志伦	男	88Y	股骨粗隆间骨折	胆囊结石;老年性心脏病;高血压病;前列腺结石;胆囊息肉;下肢静脉血栓形成	治愈	杨雷	胡炜	218371	股骨骨折闭合复位髓内针内固定术;股骨植骨术
146	D09(创伤1)	2023-04-25	2023-04-28	3360050	赵利华	男	55Y	取除骨折内固定装置	高血压病;前列腺增生;脂肪肝;下肢静脉血栓形成;肾结石	其他	赵友明	赵友明	柯陈荣	胫骨内固定装置去除术
147	D09(创伤1)	2023-04-10	2023-04-29	3360343	邵彩华	女	60Y	股骨颈骨折	间质性肺病;下肢静脉血栓形成;陈旧性肺结核	好转	杨雷	胡炜	218371	全髋关节置换;髋关节滑膜切除术
148	D09(创伤1)	2023-04-18	2023-04-30	3361083	赵秀兰	女	87Y	股骨颈骨折	腰椎间盘突出;腰椎退行性病变;高血压病;骨质疏松;下肢静脉血栓形成;抑郁症	未愈	杨雷	胡炜	218371	人工肱骨头置换术;髋关节滑膜切除术
149	D09(创伤1)	2023-05-18	2023-05-28	3372073	郑林媛	女	87Y	股骨颈骨折	下肢静脉血栓形成	治愈	汤骏	吴剑彬	吴剑彬	人工股骨头置换术;股静脉穿刺术;下腔静脉滤器置入术
150	D09(创伤1)	2023-05-08	2023-05-29	3372302	吴冬香	女	62Y	髋臼骨折	肺大疱;膝关节退行性病变;腓骨骨折;骨盆骨折;髂骨骨折;多处浅表损伤;半月板撕裂，近期的;膝关节前十字韧带损伤;膝关节十字韧带损伤;膝关节副韧带断裂;股四头肌肌腱损伤;股骨外髁骨折;耻骨骨折;脂肪肝;下肢静脉血栓形成;肺部结节	治愈	赵友明	柯陈荣	柯陈荣	关节滑膜切除术;股静脉穿刺术;下肢韧带缝合术;石膏绷带固定;髋骨骨折切开复位钢板内固定术;下腔静脉滤器置入术
151	D09(创伤1)	2023-05-20	2023-05-30	3373031	陈秀青	女	53Y	胫骨上端骨折	脂肪肝;静脉石;下肢静脉血栓形成;半月板撕裂，近期的;膝关节前十字韧带部分断裂;肌腱损伤;关节积液	治愈	赵友明	柯陈荣	柯陈荣	髂骨切除术用作移植物;胫骨植骨术;石膏绷带固定;胫骨骨折切开复位钢板内固定术;关节软骨修复术
152	D09(创伤1)	2023-05-06	2023-05-31	3372814	夏生妹	女	63Y	开放性胫骨骨折	小腿浅表损伤;下肢静脉血栓形成;肾积水伴肾输尿管结石;胆囊结石;肝胆管扩张;胆总管结石;下肢开放性伤口	好转	杨雷	胡炜	白炳力	肾造口术;创面封闭式负压引流术（VSD）;大腿截断术
153	D09(创伤1)	2023-05-12	2023-06-06	3375738	柯钱香	女	81Y	开放性胫骨下端骨折	高血压;下肢静脉血栓形成;脂肪肝	治愈	杨雷	胡炜	白炳力	皮肤和皮下坏死组织切除清创术;胫骨骨折切开复位髓内针内固定术;创面封闭式负压引流术（VSD）;外固定架固定
154	D09(创伤1)	2023-05-25	2023-06-07	3376248	王阿菊	女	71Y	股骨骨折	下肢深静脉血栓形成;糖尿病	治愈	汤骏	吴剑彬	吴剑彬	静脉穿刺术;下腔静脉滤器置入术;股骨骨折切开复位钢板内固定术
155	D09(创伤1)	2023-05-30	2023-06-10	3377034	陈秀华	女	68Y	锁骨骨折	下肢静脉血栓形成;脱髓鞘性脑病	治愈	汤骏	汤骏	吴剑彬	锁骨骨折切开复位钢针内固定术
156	D09(创伤1)	2023-06-03	2023-06-14	3378681	柯和体	男	33Y	骨折不连接\[假关节\]	肝钙化灶;脂肪肝;下肢静脉血栓形成	治愈	汤骏	汤骏	吴剑彬	跟骨截骨术;跟骨人工骨植骨术
157	D09(创伤1)	2023-06-07	2023-06-14	3378727	谢纯友	男	88Y	股骨粗隆下骨折	后天性肾囊肿;高血压;下肢静脉血栓形成	治愈	汤骏	吴剑彬	吴剑彬	股骨骨折切开复位髓内针内固定术
158	D09(创伤1)	2023-06-08	2023-06-17	3379751	沈凤妹	女	76Y	桡骨远端骨折	股骨转子间骨折;支气管扩张伴感染;胰腺囊肿;胸腔积液;支气管炎;下肢静脉血栓形成	治愈	杨雷	杨雷	白炳力	桡骨骨折闭合复位钢板内固定术;桡骨骨骺分离切开复位术
159	D09(创伤1)	2023-06-25	2023-06-28	3384978	周益玉	女	62Y	踝关节骨折	高血压;静脉血栓形成	好转	杨雷	杨雷	白炳力	踝关节内固定装置去除术
160	D09(创伤1)	2023-06-24	2023-07-01	3385818	陈素英	女	85Y	股骨粗隆间骨折	创伤性胸腔积液;多发性肝囊肿;胸膜肿物;肾结石;下肢静脉血栓形成;下肢动脉粥样硬化;动脉的动脉粥样硬化，其他的;脱髓鞘病;脑软化灶;老年性心脏瓣膜病;老年性脑萎缩	治愈	赵友明	方文来	方文来	下腔静脉滤器置入术;股骨骨折闭合复位髓内针内固定术
161	D09(创伤1)	2023-06-25	2023-07-01	3386041	邹钊东	男	52Y	股骨粗隆间骨折	腰椎退行性病变;脊髓损伤;腰椎间盘突出;老年性心脏瓣膜病;脂肪肝;胸椎骨折;头皮血肿;耻骨骨折;颈椎间盘突出;下肢静脉血栓形成;肺大疱;创伤性胸腔积液;肾结石;肌腱和肌肉损伤;手术后状态，其他特指的	治愈	赵友明	方文来	方文来	下腔静脉滤器置入术;股静脉穿刺术;下肢静脉造影;股骨骨折闭合复位髓内针内固定术
162	D09(创伤1)	2023-06-14	2023-07-06	3388403	曾洪金	男	55Y	开放性胫腓骨干骨折	下肢皮肤撕裂伤;窦性心动过缓;在踝和足水平的神经的损伤;肝钙化灶;后天性肾囊肿;下肢深静脉血栓形成;下肢动脉粥样硬化	治愈	赵友明	方文来	方文来	皮肤和皮下坏死组织切除清创术;腓骨骨折切开复位钢板内固定术;胫骨外固定术;创面封闭式负压引流术（VSD）
163	D09(创伤1)	2023-06-27	2023-07-08	3388867	陈凤英	女	64Y	跖骨骨折	开放性足损伤;脂肪肝;下肢浅表损伤;下肢静脉血栓形成;跖骨骨折	未愈	杨雷	周一飞	白炳力	创面封闭式负压引流术（VSD）;跖骨骨折切开复位内固定术
164	D09(创伤1)	2023-06-19	2023-07-10	3390310	潘青弟	男	67Y	开放性胫骨骨折	小腿挫伤;下肢静脉血栓形成;心功能不全;下肢皮肤套脱伤	好转	陈龙	陈龙	王特	中厚皮片移植术;同种皮片移植术;胫骨骨折闭合复位髓内针内固定术;皮肤缝合术;创面封闭式负压引流术（VSD）;皮肤和皮下坏死组织切除清创术
165	D09(创伤1)	2023-07-05	2023-07-22	3395758	赵莲娟	女	60Y	股骨颈骨折	纵隔淋巴结肿大;尺骨和桡骨下端均骨折;腕和腕关节韧带创伤性破裂;手术后恢复期;高血压;下肢静脉血栓形成;老年性心脏病;肺部结节	好转	赵友明	方文来	方文来	股骨骨折闭合复位钢针内固定术;关节软骨修复术;桡骨植骨术;桡骨病损切除术
166	D09(创伤1)	2023-07-16	2023-07-25	3396933	徐寿根	男	76Y	髋臼骨折	耻骨骨折;尾骨骨折;肩关节脱位;肩袖肌腱损伤;肝回声不均;胰管扩张;前列腺增生;下肢静脉血栓形成	治愈	汤骏	吴剑彬	吴剑彬
167	D09(创伤1)	2023-07-29	2023-08-11	3404645	吴贤付	男	65Y	胫骨平台骨折	下肢深静脉血栓形成;脂肪肝;多发性肝囊肿;后天性肾囊肿	治愈	吴剑彬	吴剑彬	吴剑彬	下腔静脉滤器置入术;股静脉穿刺术
168	D09(创伤1)	2023-08-06	2023-08-14	3406271	王彩领	女	83Y	股骨颈骨折	原发性单侧膝关节病;人工膝关节;脂肪肝;胆囊结石;动脉的动脉粥样硬化，其他的;下肢动脉粥样硬化;下肢静脉血栓形成;老年性心脏病;高血压;2型糖尿病	好转	赵友明	方文来	方文来	全髋关节置换;关节滑膜切除术
169	D09(创伤1)	2023-08-12	2023-08-16	3406837	苏彩凤	女	81Y	肱骨近端骨折	下肢静脉血栓形成;肾功能不全;代谢性酸中毒;高钾血症;小细胞低色素性贫血;甲状旁腺功能亢进症;下肢动脉粥样硬化;脊柱侧弯;老年性心脏病	未愈	赵友明	方文来	方文来
170	D09(创伤1)	2023-08-11	2023-08-17	3407522	张银翠	女	60Y	耻骨骨折	骶骨骨折;下肢静脉血栓形成;肝回声不均	治愈	杨雷	周一飞	白炳力	骨盆骨折切开复位钢针内固定术
171	D09(创伤1)	2023-08-07	2023-08-19	3407968	林荣标	男	61Y	胫腓骨干骨折	肝囊肿;膀胱结石;下肢静脉血栓形成;肾超声检查异常;后天性肾囊肿;肾结石;前列腺结石;肺钙化;老年性心脏病	好转	赵友明	赵友明	方文来	胫骨骨折切开复位髓内针内固定术
172	D09(创伤1)	2023-08-07	2023-08-19	3408021	金持良	男	55Y	胫骨平台骨折	腰椎退行性病变;肝回声不均;肝钙化灶;后天性肾囊肿;下肢静脉血栓形成;外侧半月板损伤;膝关节扭伤;腰椎骨折L1;跟骨骨折;腰椎间盘突出	治愈	汤骏	吴剑彬	吴剑彬	膝关节半月板成形术;胫骨骨折切开复位钢板内固定术;关节软骨修复术
173	D09(创伤1)	2023-08-15	2023-08-26	3411476	张茂芝	男	60Y	髌骨骨折	下肢静脉血栓形成;脂肪肝;前列腺结石;心功能不全	好转	陈龙	陈龙	王特	髌韧带重建术;髌骨骨折切开复位张力带钢丝内固定术
174	D09(创伤1)	2023-08-22	2023-09-09	3417386	郑奀华	男	56Y	股骨骨折	下肢静脉血栓形成;心功能不全;腹腔积液;多脏器功能衰竭;神经损伤;肺挫伤;十二指肠球部溃疡;慢性胃炎;主动脉钙化;肺气肿;肺的其他疾患;血管损伤;创伤性胸腔积液;心包积液	治愈	汤骏	吴剑彬	吴剑彬	创面封闭式负压引流术（VSD);大腿截断术
175	D09(创伤1)	2023-09-11	2023-09-18	3420841	吴朝德	男	54Y	肱骨近端骨折	半月板撕裂，近期的;皮下血肿;不完全性肠梗阻;下肢动脉粥样硬化;下肢静脉血栓形成;创伤性湿肺;胸腔积液;肋骨骨折;创伤性阴囊血肿;膝关节积液;胫骨平台骨折;腰椎骨折;膝关节十字韧带损伤;膝关节内侧副韧带损伤;膝关节外侧副韧带损伤	治愈	赵友明	柯陈荣	219048	关节软骨修复术;肱骨骨折切开复位钢板内固定术;下腔静脉滤器置入术;股静脉穿刺术;胫骨折骨术;胫骨骨折切开复位髓内针内固定术
176	D09(创伤1)	2023-09-12	2023-09-23	3422674	郑金妹	女	80Y	股骨粗隆间骨折	老年性关节炎;心功能不全;胆囊结石;后天性肾囊肿;静脉血栓形成;骨质疏松，其他的;膝关节积液	治愈	汤骏	吴剑彬	吴剑彬	股骨骨折闭合复位髓内针内固定术
177	D09(创伤1)	2023-09-11	2023-09-23	3422732	黄为田	男	49Y	跟骨骨折	脂肪肝;下肢静脉血栓形成	治愈	陈龙	应晓洲	应晓洲	骨移植术;跟骨骨折切开复位钢板内固定术
178	D09(创伤1)	2023-09-10	2023-09-23	3423059	曾洪金	男	56Y	胫骨下端骨折	下肢静脉血栓形成;脂肪肝;肝钙化灶;后天性肾囊肿;前列腺结石;前列腺囊肿;在踝和足水平的神经的损伤	治愈	赵友明	柯陈荣	219048	胫骨植骨术;髂骨切除术用作移植物;胫骨骨折切开复位钢针内固定术
179	D09(创伤1)	2023-09-16	2023-09-24	3423561	黄树柳	女	87Y	股骨粗隆间骨折	后天性肾囊肿;肝回声不均;高血压;下肢静脉血栓形成	治愈	周一飞	周一飞	白炳力	股骨骨折闭合复位钢针内固定术
180	D09(创伤1)	2023-08-19	2023-09-24	3423565	谢学守	男	57Y	股骨干骨折	腰椎骨折;创伤性胸腔积液;下肢静脉血栓形成;头皮血肿	治愈	杨雷	周一飞	白炳力	股骨骨折闭合复位钢针内固定术;创面封闭式负压引流术（VSD)
181	D09(创伤1)	2023-09-22	2023-09-30	3426612	王子花	女	90Y	股骨粗隆间骨折	高血压;胆囊息肉;后天性肾囊肿;下肢深静脉血栓形成;主动脉钙化	治愈	陈龙	应晓洲	应晓洲	股骨骨折切开复位螺钉内固定术
182	D09(创伤1)	2023-09-18	2023-10-09	3429223	张荷凤	女	69Y	尺骨和桡骨下端均骨折	在髋和大腿水平的股静脉损伤;髂骨骨折;腰椎骨折;腰椎前移;腰椎退行性病变;肝囊肿;后天性肾囊肿;脂肪肝;胆囊结石;胆囊息肉;下肢静脉曲张;颈动脉硬化;肱骨内髁骨折;肱骨小头骨折;上肢关节和韧带损伤;腕骨骨折;股动脉血栓形成;下肢皮肤套脱伤	好转	赵友明	柯陈荣	219048	石膏绷带固定;关节软骨修复术;肱骨骨折切开复位螺钉内固定术;桡骨骨折切开复位钢板内固定术
183	D09(创伤1)	2023-09-22	2023-10-19	3433498	陈学魁	男	62Y	胫腓骨闭合性骨折	骨盆骨折;肋骨多处骨折;静脉血栓形成;创伤性气胸;后天性肾囊肿;腹腔积液;肝钙化灶;下肢静脉血栓形成	治愈	陈龙	应晓洲	应晓洲	髂动脉栓塞术;髂动脉造影;腓骨骨折切开复位钢板内固定术;胫骨骨折切开复位钢板内固定术
184	D09(创伤1)	2023-09-10	2023-10-20	3433511	陈兰儿	男	68Y	骨折不连接\[假关节\]	下肢动脉硬化闭塞症;后天性肾囊肿;肋骨骨折;髋关节积液;软组织感染;帕金森病;特发性(原发性)高血压;肾结石;下肢静脉血栓形成	治愈	陈龙	应晓洲	应晓洲	股骨内固定装置去除术;丙烯酸水泥骨空隙填充;骨髓其他手术
185	D09(创伤1)	2023-10-16	2023-10-21	3434279	孙金琴	女	55Y	股骨颈骨折	帕金森病;创伤性胸腔积液;主动脉(瓣)关闭不全;下肢静脉血栓形成	治愈	赵友明	赵友明	219048	股骨颈/股骨转子间骨折手法整复术;股骨骨折闭合复位螺钉内固定术
186	D09(创伤1)	2023-10-31	2023-11-06	3441204	余来钗	女	81Y	股骨骨折	冠状动脉粥样硬化性心脏病;急性下壁心肌梗死;冠状动脉支架植入后状态;2型糖尿病;心功能不全;脂肪肝;肝钙化灶;下肢静脉血栓形成;肺的其他疾患	未愈	汤骏	吴剑彬	吴剑彬
187	D09(创伤1)	2023-10-19	2023-11-21	3448208	谢作銮	男	60Y	髂骨骨折	股骨内髁骨折;胫骨髁骨折;多处挫伤;下肢静脉血栓形成;椎间盘突出;椎管内血管瘤;腰椎退行性病变;糖尿病;肺结节病;取除骨折内固定装置;耻骨骨折;腰椎骨折	治愈	杨雷	周一飞	白炳力	髂骨骨折切开复位钢板内固定术;下肢静脉造影;股静脉穿刺术;腰椎骨折切开复位内固定术;椎弓根钉内固定术;下腔静脉支架置入术;股骨骨折切开复位螺钉内固定术;盆骨骨折切开复位内固定术
188	D09(创伤1)	2023-11-14	2023-11-26	3450190	林国华	男	66Y	胫骨骨折	脂肪肝;后天性肾囊肿;前列腺增生;下肢静脉血栓形成	治愈	杨雷	周一飞	白炳力	胫骨骨折切开复位内固定术
189	D09(创伤1)	2023-12-02	2023-12-03	3453386	胡美柳	女	63Y	掌骨骨折	下肢静脉血栓形成;脂肪肝;胆囊息肉;肾结石	好转	汤骏	吴剑彬	吴剑彬
190	D09(创伤1)	2023-11-26	2023-12-09	3455596	南巧翠	女	52Y	膝关节十字韧带损伤	胫骨上端骨折;半月板撕裂，近期的;膝关节积液;多处挫伤;下肢静脉血栓形成;脂肪肝;后天性肾囊肿	治愈	杨雷	周一飞	白炳力	副韧带的其他修补术
191	D09(创伤1)	2023-11-26	2023-12-09	3455598	欧南华	男	60Y	尺骨和桡骨下端均骨折	髂骨骨折;大多角骨骨折;三根肋骨骨折不伴第一肋骨骨折;下肢深静脉血栓形成;下肢动脉粥样硬化	好转	汤骏	吴剑彬	吴剑彬	桡骨骨折切开复位钢板内固定术;下肢静脉造影;股静脉穿刺术;盆骨骨折切开复位内固定术;下腔静脉滤器置入术
192	D09(创伤1)	2023-12-02	2023-12-13	3457632	严桂珍	女	70Y	股骨粗隆间骨折	下肢静脉曲张;下肢静脉血栓形成;主动脉瓣疾患;主动脉(瓣)关闭不全;心功能不全	治愈	陈龙	应晓洲	应晓洲	股骨骨折闭合复位螺钉内固定术
193	D09(创伤1)	2023-12-09	2023-12-15	3458315	厉陈顺	男	85Y	股骨粗隆间骨折	脑梗死;糖尿病;肺肿物;膝关节退行性病变;高血压;下肢静脉血栓形成;肝胆管扩张;肝内胆管结石;后天性肾囊肿;心房过早除极;前列腺增生;前列腺结石	治愈	汤骏	吴剑彬	潘天龙	股骨骨折闭合复位髓内针内固定术
194	D09(创伤1)	2023-12-14	2023-12-17	3459290	胡碎兰	女	89Y	股骨粗隆间骨折	胸椎骨折;腰骶椎间盘脱出;胸椎退行性病变;腰椎退行性病变;创伤性胸腔积液;肺炎;下肢静脉血栓形成;先天性心脏畸形;房间隔缺损;肺动脉高压重度;后天性肾囊肿;心房颤动;心室过早除极;主动脉瓣钙化;主动脉瓣狭窄;心功能不全	好转	汤骏	吴剑彬	潘天龙
195	D09(创伤1)	2023-12-10	2023-12-19	3460364	陈祥友	男	56Y	骶骨骨折	髋臼骨折;静脉血栓形成;头皮血肿;后天性肾囊肿;胆囊息肉;下肢静脉曲张;肺大疱	治愈	杨雷	周一飞	白炳力	骨盆骨折闭合性复位术
196	D09(创伤1)	2023-12-14	2023-12-25	3462641	张召葱	男	53Y	股骨粗隆间骨折	静脉栓塞和血栓形成;面部挫伤;帕金森病;老年性心脏病	治愈	赵友明	柯陈荣	汪吉棋	股骨骨折闭合复位髓内针内固定术;股静脉穿刺术;下腔静脉滤器置入术
197	D10(创伤2)	2023-01-02	2023-01-08	3316521	吴爱花	女	64Y	桡骨下端骨折	尺骨茎突骨折;脂肪肝;下肢静脉血栓形成	好转	黄俊武	王鉴顺	218239	关节软骨修复术;桡骨骨折切开复位钢板内固定术
198	D10(创伤2)	2022-12-29	2023-01-19	3321375	陈志仁	男	58Y	开放性拇趾骨折	脂肪肝;脾特指疾病;开放性足损伤;趾关节脱位;下肢静脉血栓形成;肝囊肿;后天性肾囊肿;肾结石	好转	陈华	孙辽军	王特	趾关节脱位切开复位术;下肢动脉探查术;皮肤和皮下组织非切除性清创;残端修正术;趾骨骨折切开复位螺钉内固定术;关节软骨修复术
199	D10(创伤2)	2023-01-11	2023-01-20	3321595	黄严光	男	40Y	距骨骨折	胫距关节脱位;跖骨骨折;外踝骨折;下肢静脉血栓形成;肺结节;肺纤维化	治愈	石成弟	胡炜	胡炜	跖骨骨折闭合复位螺钉内固定术;距骨骨折闭合复位术
200	D10(创伤2)	2023-01-22	2023-01-25	3323737	陈仕缪	女	95Y	股骨颈骨折	肝囊肿;下肢静脉血栓形成;下肢动脉硬化闭塞症;下肢动脉粥样硬化;高血压病;多发性肋骨骨折;后天性肾囊肿	好转	陈华	孙辽军	王特
201	D10(创伤2)	2023-01-19	2023-01-28	3324752	姜如弟	女	83Y	股骨粗隆间骨折	心功能不全;尺骨桡骨远端骨折;高血压病;2型糖尿病;脑血管病后遗症;下肢静脉血栓形成	治愈	石成弟	胡炜	胡炜	股骨骨折闭合复位钢针内固定术
202	D10(创伤2)	2023-01-28	2023-02-02	3327510	冯洪利	女	89Y	股骨颈骨折	下肢静脉血栓形成;肾结石;后天性肾囊肿;胸腔积液;甲状腺肿;肺部感染	好转	黄俊武	王鉴顺	218239	关节软骨修复术;髋关节滑膜切除术;人工股骨头置换术
203	D10(创伤2)	2023-02-12	2023-02-14	3330944	陈小云	女	60Y	闭合性胫骨平台骨折	高血压病;慢性乙型病毒性肝炎;下肢特指深部脉管静脉炎和血栓性静脉炎	治愈	石成弟	胡炜	胡炜
204	D10(创伤2)	2023-02-07	2023-02-18	3332141	陈大媄	女	76Y	肱骨上端骨折	肩袖损伤;二头肌长头肌肉和肌腱损伤;脂肪肝;多发性肝囊肿;胆囊结石;肾结石;下肢动脉粥样硬化;下肢静脉血栓形成	治愈	石成弟	胡炜	胡炜	肱二头肌缝合术;肩袖修补术;肱骨人工骨植骨术;肱骨骨折切开复位钢板内固定术
205	D10(创伤2)	2023-02-09	2023-02-19	3332603	刘文通	男	81Y	股骨粗隆间骨折	脑卒中后遗症;下肢静脉血栓形成;后天性肾囊肿;肺部感染;肺粘液栓塞	好转	黄俊武	王鉴顺	218239	股骨骨折闭合复位髓内针内固定术
206	D10(创伤2)	2023-02-15	2023-02-21	3333415	雷大桃	男	72Y	股骨粗隆间骨折	前列腺结石;后天性肾囊肿;下肢静脉血栓形成;前列腺增生	好转	黄俊武	王鉴顺	218239	股骨骨折闭合复位髓内针内固定术;股骨人工骨植骨术
207	D10(创伤2)	2023-02-19	2023-02-25	3335077	卢奄仁	男	49Y	胫骨骨折	肾结石;下肢静脉血栓形成;取除骨折内固定装置	好转	黄俊武	王鉴顺	218239	胫骨植骨术;胫骨内固定物取出术;胫骨骨折切开复位钢板内固定术
208	D10(创伤2)	2023-02-16	2023-02-27	3336057	邹春雷	女	80Y	股骨粗隆间骨折	糖尿病;高血压病;下肢静脉血栓形成;胆囊结石	好转	黄俊武	王鉴顺	218239	股骨人工骨植骨术;股骨骨折闭合复位髓内针内固定术
209	D10(创伤2)	2023-02-26	2023-03-04	3337810	马建华	女	73Y	肱骨上端骨折	高血压病;下肢静脉血栓形成;心功能不全	好转	黄俊武	余贤斌	218239	肱骨骨折切开复位钢板内固定术
210	D10(创伤2)	2023-02-27	2023-03-05	3338115	吴美玉	女	87Y	股骨粗隆间骨折	肺部感染;下肢静脉血栓形成;脱髓鞘性白质脑病;老年性脑变性;多发性脑梗死;陈旧性肋骨骨折;骨质疏松	好转	黄俊武	余贤斌	218239	股骨骨折闭合复位髓内针内固定术
211	D10(创伤2)	2023-03-05	2023-03-12	3341177	周品珍	女	67Y	三踝骨折	后天性肾囊肿;肾结石;踝关节脱位;肝囊肿;脂肪肝;下肢静脉血栓形成;心功能不全	治愈	黄俊武	余贤斌	218239	踝关节骨折切开复位钢板内固定术;踝融合术
212	D10(创伤2)	2023-03-13	2023-03-19	3344161	周秀珠	女	88Y	股骨粗隆间骨折	双侧小肾;肝回声不均;下肢动脉粥样硬化;腹腔囊肿;肺炎;下肢静脉血栓形成;心功能不全;甲状腺肿	好转	黄俊武	余贤斌	218239	股骨骨折闭合复位髓内针内固定术
213	D10(创伤2)	2023-02-18	2023-03-20	3344572	谢庆甫	男	85Y	股骨颈骨折	后天性肾囊肿;肾结石;肝回声不均;纵隔淋巴结肿大;阴囊水囊肿;高血压病;脾大;肾萎缩;肺水肿;胸腔积液;下肢静脉血栓形成;主动脉钙化;心功能不全	好转	陈华	孙辽军	王特	人工股骨头置换术;皮肤和皮下坏死组织切除清创术
214	D10(创伤2)	2023-03-12	2023-03-27	3347297	郭英花	女	90Y	股骨髁上骨折	双踝骨折;肺部感染;下肢静脉血栓形成;老年性脑萎缩	治愈	黄义星	黄义星	张儒	下肢静脉滤器置入术;下肢静脉造影;股骨植骨术;踝关节骨折切开复位螺钉内固定术;股骨骨折切开复位钢板内固定术
215	D10(创伤2)	2023-03-18	2023-04-01	3349013	林祥隆	男	86Y	股骨粗隆间骨折	喉恶性肿瘤个人史;具有心脏和血管植入物和移植物;高血压病;室性早搏;前列腺结石;泌尿道感染;胸腔积液;下肢静脉血栓形成;心功能不全	好转	黄俊武	余贤斌	218239	股骨植骨术;股骨骨折闭合复位钢针内固定术
216	D10(创伤2)	2023-03-23	2023-04-02	3349583	章春叶	女	75Y	股骨特指部位骨折	乙型病毒性肝炎;踝骨闭合性骨折;后天性肾囊肿;肾积水伴肾输尿管结石;静脉栓塞和血栓形成;高血压病;2型糖尿病;脂肪肝	好转	石成弟	石成弟	218372	股骨植骨术;石膏托固定术;股骨骨折切开复位钢板内固定术
217	D10(创伤2)	2023-03-25	2023-04-02	3349618	陈银发	男	39Y	跖骨骨折	足楔状骨骨折;肝回声不均;骰骨骨折;下肢静脉血栓形成	好转	陈华	孙辽军	王特	跖骨骨折切开复位钢板内固定术
218	D10(创伤2)	2023-03-10	2023-04-04	3350423	陈建国	男	56Y	股骨下端骨折	腹膜后肿物;坠积性肺炎;下肢静脉血栓形成;心包积液;下肢皮肤套脱伤;四头肌和肌腱损伤;后天性肾囊肿;前列腺钙化灶;胆囊肿大;腹腔积血;陈旧性肋骨骨折;跟骨骨折;腓骨骨折;髌骨骨折;腰椎骨折;颈椎关节强硬;脂肪肝	治愈	石成弟	石成弟	218372	胫骨外固定术;股四头肌缝合术;创面封闭式负压引流术（VSD);中厚皮片移植术;股骨骨折切开复位钢针内固定术
219	D10(创伤2)	2023-03-30	2023-04-08	3351814	王秀凤	女	86Y	股骨粗隆间骨折	高血压病;肝钙化灶;脂肪肝;肺部感染;下肢静脉血栓形成;心功能不全;肺结节	治愈	陈华	孙辽军	王特	股骨骨折闭合复位螺钉内固定术
220	D10(创伤2)	2023-03-27	2023-04-09	3352262	陈招翠	女	75Y	股骨粗隆下骨折	开放性胸部损伤;液气胸;静脉栓塞和血栓形成;脊髓损伤;头皮血肿;跖骨骨折;耻骨骨折;骶骨骨折;腰椎骨折;骨质疏松;颈椎关节强硬;泌尿道感染;心功能不全;足骨折;肾结石;创伤性硬膜外出血;多发性肋骨骨折	好转	黄俊武	余贤斌	218239	胸椎骨折球囊扩张成形术;跖骨骨折切开复位钢板内固定术;股骨骨折闭合复位钢针内固定术;胸椎骨折切开复位内固定术;外固定架固定;股骨人工骨植骨术
221	D10(创伤2)	2023-04-01	2023-04-11	3353182	林爱娥	女	81Y	肱骨上端骨折	后天性肾囊肿;肾超声检查异常;肝回声不均;股骨粗隆间骨折;胆总管扩张;下肢静脉血栓形成;心功能不全	好转	陈华	孙辽军	王特	肱骨骨折切开复位钢板内固定术;股骨骨折闭合复位螺钉内固定术;关节软骨修复术
222	D10(创伤2)	2023-03-29	2023-04-12	3353405	胡竹兰	女	76Y	股骨颈骨折	后天性肾囊肿;肾结石;人工髋关节;胆囊结石;高血压病;骨质疏松;泌尿道感染;胆囊炎;下肢静脉血栓形成;心功能不全	好转	黄俊武	余贤斌	218239	人工股骨头置换术;髋关节滑膜切除术
223	D10(创伤2)	2023-04-05	2023-04-14	3354276	项宝凤	女	75Y	股骨头无菌性坏死	下肢静脉肌间血栓形成;髋关节炎;取除骨折内固定装置;心功能不全	好转	陈华	孙辽军	王特	全髋关节置换;股骨内固定装置去除术;髋关节滑膜切除术
224	D10(创伤2)	2023-04-10	2023-04-15	3354401	章梅英	女	61Y	膝关节副韧带扭伤	膝关节十字韧带扭伤;闭合性胫骨平台骨折;下肢动脉粥样硬化;下肢静脉肌间血栓形成;原发性单侧膝关节病;外侧半月板损伤;内侧半月板损伤;泌尿道感染	好转	黄俊武	余贤斌	218239	副韧带修补术;石膏绷带固定
225	D10(创伤2)	2023-04-07	2023-04-15	3354693	陈永灿	男	64Y	股骨颈骨折	后天性肾囊肿;高血压病;前列腺增生;肾钙化;下肢静脉血栓形成	好转	陈华	孙辽军	王特	全髋关节表面置换术
226	D10(创伤2)	2023-04-13	2023-04-19	3356558	陈时欢	男	87Y	股骨颈骨折	下肢动脉粥样硬化;肝囊肿;肺部感染;下肢静脉血栓形成	好转	黄俊武	余贤斌	218239	髋关节滑膜切除术;人工股骨头置换术
227	D10(创伤2)	2023-04-14	2023-04-21	3357168	罗阿英	女	75Y	股骨颈骨折	下肢静脉血栓形成;心功能不全;陈旧性肺结核	好转	陈华	孙辽军	王特	人工股骨头置换术;髋关节滑膜切除术
228	D10(创伤2)	2023-04-13	2023-04-22	3357275	朱敬乐	女	90Y	股骨颈骨折	下肢动脉粥样硬化;腰椎退行性病变;胸椎退行性病变;股骨粗隆间骨折;骨质疏松;泌尿道感染;胸腔积液;肺大泡;下肢静脉血栓形成;心功能不全	治愈	黄俊武	余贤斌	218239	股骨骨折闭合复位钢针内固定术
229	D10(创伤2)	2023-04-13	2023-04-22	3357297	戴香娟	女	89Y	股骨粗隆间骨折	高血压性心脏病;下肢动脉粥样硬化;特指心脏传导阻滞;2型糖尿病;下肢静脉血栓形成;心功能不全	好转	黄俊武	黄俊武	218239	股骨骨折闭合复位钢针内固定术
230	D10(创伤2)	2023-04-11	2023-04-23	3358039	李秀珠	女	80Y	股骨颈骨折	后天性肾囊肿;胆囊结石;高血压病;2型糖尿病;肝胆管扩张;胆囊病变;肝钙化灶;下肢静脉血栓形成;心功能不全	好转	陈华	孙辽军	王特	髋关节滑膜切除术;人工股骨头置换术
231	D10(创伤2)	2023-04-17	2023-04-26	3359165	李陈浩	男	85Y	髌骨骨折	多发性肝囊肿;高血压病;前列腺结石;肝病;下肢动脉血栓形成;下肢动脉粥样硬化	好转	石成弟	石成弟	石成弟	髌骨骨折切开复位螺钉内固定术
232	D10(创伤2)	2023-04-24	2023-04-27	3359737	徐爱玲	女	55Y	外踝骨折	多发性肝囊肿;踝关节脱位;下肢静脉肌间血栓形成;子宫切除术后状态	好转	黄俊武	余贤斌	218239	踝关节骨折切开复位钢板内固定术;关节软骨修复术;踝关节修补术
233	D10(创伤2)	2023-04-26	2023-05-03	3362012	石岳松	男	59Y	开放性膝部损伤	肺结节;前列腺结石;肋骨骨折;髌骨骨折;肺挫伤;肾结石;下肢静脉血栓形成	治愈	黄义星	黄义星	张儒	创面封闭式负压引流术（VSD）
234	D10(创伤2)	2023-05-03	2023-05-05	3362710	薛陈菊	女	94Y	股骨粗隆下骨折	下肢静脉血栓形成;高尿酸血症;高血压病;心房颤动;重度贫血;后天性肾囊肿	好转	黄义星	黄义星	张儒
235	D10(创伤2)	2023-04-28	2023-05-06	3362857	苏阿栋	女	90Y	股骨粗隆间骨折	下肢动脉粥样硬化;膀胱结石;支气管扩张;下肢静脉血栓形成;心功能不全	好转	黄俊武	余贤斌	郑文浩	股骨骨折闭合复位螺钉内固定术;股骨植骨术
236	D10(创伤2)	2023-04-14	2023-05-08	3363988	郑优优	女	31Y	股骨干骨折	下腔静脉血栓形成;膝关节脱位;胫腓骨干骨折;下肢皮肤套脱伤	好转	陈华	孙辽军	王特	股骨外固定装置去除术;膝关节的其他切除术;创面封闭式负压引流术（VSD）;股骨骨折切开复位钢板内固定术;皮肤和皮下坏死组织切除清创术;股骨骨折闭合复位螺钉内固定术;股骨骨折闭合复位髓内针内固定术
237	D10(创伤2)	2023-05-02	2023-05-09	3364289	潘王蕊	女	50Y	股骨颈骨折	下肢静脉血栓形成	好转	黄俊武	余贤斌	郑文浩	股骨骨折闭合复位螺钉内固定术
238	D10(创伤2)	2023-04-30	2023-05-15	3366658	麻美云	女	57Y	胫腓骨闭合性骨折	膝外侧半月板损伤;慢性乙型病毒性肝炎;肾错构瘤;肝囊肿;下肢静脉血栓形成	治愈	石成弟	石成弟	卢迪	胫骨骨折切开复位钢板内固定术;下肢静脉滤器置入术;下肢静脉造影;关节软骨修复术;膝关节半月板成形术
239	D10(创伤2)	2023-04-18	2023-05-28	3371830	包启弟	女	65Y	骨盆骨折	开放性股骨骨折;下肢皮肤套脱伤;高血压;下肢静脉肌间血栓形成;腹水;胆汁淤积症;手术后状态，其他特指的	好转	黄俊武	余贤斌	郑文浩	创面封闭式负压引流术（VSD）;骨盆内固定装置去除术;股骨植骨术;髂骨骨折切开复位钢板内固定术;股骨骨折切开复位髓内针内固定术
240	D10(创伤2)	2023-05-24	2023-06-05	3375240	郑立闯	男	73Y	锁骨骨折	创伤后伤口感染;多处挫伤;下肢静脉血栓形成	治愈	黄义星	黄义星	张儒	锁骨骨折切开复位钢板内固定术
241	D10(创伤2)	2023-05-27	2023-06-05	3375369	王素云	女	83Y	股骨颈骨折	主动脉（瓣）关闭不全;后天性肾囊肿;静脉栓塞和血栓形成;肝囊肿;胸腔积液;下肢静脉曲张;心功能不全	好转	黄俊武	余贤斌	郑文浩	人工股骨头置换术;髋关节滑膜切除术
242	D10(创伤2)	2023-05-23	2023-06-06	3375768	谭时祥	男	50Y	股骨粗隆下骨折	髋臼骨折;股骨转子间骨折;下肢静脉血栓形成;胸腔积液;胆汁淤积症;腰椎骨折;腹腔积液;肾周血肿;创伤性肾血肿;耻骨联合骨折;耻骨分支骨折;骶骨骨折	好转	陈华	孙辽军	蔡乐益	股骨骨折闭合复位螺钉内固定术
243	D10(创伤2)	2023-05-29	2023-06-10	3376878	严玉女	女	88Y	股骨颈骨折	胆囊结石;下肢静脉血栓形成;心功能不全;肝回声不均	好转	陈华	孙辽军	蔡乐益	髋关节滑膜切除术;人工股骨头置换术
244	D10(创伤2)	2023-06-10	2023-06-17	3380034	朱三蕊	女	77Y	桡骨下端骨折	髂骨骨折;腰椎骨折;胰管扩张;胆总管扩张;下肢静脉血栓形成;后天性肾囊肿;创伤性脑损伤;耻骨分支骨折;肋骨多处骨折;蛛网膜下出血;炎症后肺纤维化;肾挫伤;骨盆骨折	治愈	陈华	孙辽军	蔡乐益	外固定架固定;桡骨骨折闭合复位螺钉内固定术;腰椎骨折球囊扩张成形术;关节软骨修复术
245	D10(创伤2)	2023-06-05	2023-06-19	3380886	叶碎芬	女	74Y	股骨髁间骨折	下肢深静脉血栓形成;心功能不全;肾结石;高血压;骨质疏松，其他的;2型糖尿病;脾大	好转	陈华	孙辽军	蔡乐益	下肢静脉造影;股骨骨折切开复位钢板内固定术;下腔静脉滤器置入术;关节软骨修复术;下腔静脉滤器取出术;股骨植骨术
246	D10(创伤2)	2023-05-22	2023-06-20	3381444	季昭二	男	72Y	股骨干骨折	下肢动脉粥样硬化;静脉血栓形成;软组织感染;多处挫伤;泌尿道感染;胸腔积液;股骨髁骨折;胫骨平台骨折;胫骨髁间棘骨折;胫骨平台伴腓骨骨折;股骨内髁骨折;失血性休克	好转	黄俊武	余贤斌	郑文浩	股骨骨折闭合复位螺钉内固定术;肱骨植骨术;胫骨骨折切开复位钢板内固定术;股骨骨折闭合复位髓内针内固定术;皮肤和皮下坏死组织切除清创术
247	D10(创伤2)	2023-06-17	2023-07-01	3385910	刘延明	男	52Y	髂骨骨折	枕骨骨折;下肢静脉肌间血栓形成;肋骨多处骨折;液气胸;胸腔积液;肺挫伤;腹膜后血肿;多处挫伤	治愈	黄义星	黄义星	张儒	下肢静脉造影;髂骨骨折切开复位钢板内固定术;下腔静脉滤器置入术
248	D10(创伤2)	2023-06-30	2023-07-08	3389236	宋立英	女	94Y	股骨粗隆间骨折	下肢动脉粥样硬化;间质性肺炎;下肢静脉肌间血栓形成;肝回声不均	好转	陈华	孙辽军	蔡乐益	股骨骨折闭合复位螺钉内固定术
249	D10(创伤2)	2023-07-06	2023-07-15	3392489	苏明奶	女	76Y	股骨骨折	高血压;主动脉（瓣）关闭不全;二尖瓣退行性变;脂肪肝;主动脉钙化;心功能不全;下肢静脉肌间血栓形成;炎症后肺纤维化	好转	黄俊武	余贤斌	郑文浩	关节软骨修复术;股骨骨折切开复位钢板内固定术
250	D10(创伤2)	2023-07-14	2023-07-21	3395140	林春妹	女	83Y	股骨粗隆间骨折	脊椎松解;高血压;老年性谵妄;2型糖尿病;后天性肾囊肿;慢性支气管炎;下肢静脉血栓形成	好转	陈华	蔡乐益	蔡乐益	股骨骨折闭合复位螺钉内固定术
251	D10(创伤2)	2023-07-03	2023-07-23	3396255	叶妙妙	女	37Y	尺骨骨折	手术后状态，其他特指的;多处挫伤;肋骨多处骨折;腹腔积液;胸腔积液;盆腔积液;肾错构瘤;下肢深静脉血栓形成;肝挫伤	好转	黄俊武	余贤斌	郑文浩	尺骨骨折切开复位钢板内固定术;下肢静脉造影;下腔静脉滤器取出术
252	D10(创伤2)	2023-07-17	2023-07-26	3397473	郑爱花	女	75Y	股骨粗隆间骨折	桡骨远端骨折;下肢静脉肌间血栓形成;脂肪肝;后天性肾囊肿	治愈	石成弟	石成弟	卢迪	股骨骨折闭合复位螺钉内固定术
253	D10(创伤2)	2023-07-26	2023-08-05	3401912	汤光伍	男	76Y	股骨颈骨折	下肢静脉肌间血栓形成;肾结石;前列腺结石	好转	黄俊武	余贤斌	郑文浩	髋轴面，陶瓷与金属;髋关节滑膜切除术;全髋关节置换
254	D10(创伤2)	2023-08-02	2023-08-10	3404441	陈守娟	女	79Y	股骨粗隆间骨折	高血压;下肢静脉血栓形成	好转	陈华	孙辽军	蔡乐益	股骨骨折闭合复位螺钉内固定术
255	D10(创伤2)	2023-07-30	2023-08-12	3405008	兰丽玉	女	43Y	股骨髁上骨折	指骨骨折;下肢动脉粥样硬化;下肢静脉肌间血栓形成	治愈	石成弟	石成弟	卢迪	股骨植骨术;股骨骨折切开复位钢板内固定术
256	D10(创伤2)	2023-07-29	2023-08-16	3406938	陈阿巧	女	80Y	股骨颈骨折	高血压;心脏搭桥术后;后天性肾囊肿;静脉血栓形成	好转	陈华	孙辽军	蔡乐益	髋轴面，陶瓷与金属;髋关节滑膜切除术;髋关节部分置换
257	D10(创伤2)	2023-08-09	2023-08-19	3408280	吴仁奶	男	88Y	股骨粗隆间骨折	高血压;肺部感染;下肢动脉粥样硬化;下肢静脉血栓形成;前列腺增生;心功能不全	好转	黄俊武	余贤斌	郑文浩	肱骨骨折闭合复位髓内针内固定术
258	D10(创伤2)	2023-08-30	2023-09-10	3417744	邓伦海	男	73Y	股骨颈骨折	肺不张;下肢静脉血栓形成;高血压;髋关节置换术后;前列腺结石;肺部感染	治愈	陈华	陈华	蔡乐益	髋关节表面置换，部分的，股骨头;髋轴面，陶瓷与金属;髋关节滑膜切除术
259	D10(创伤2)	2023-08-31	2023-09-14	3419521	章映	男	44Y	股骨干骨折	2型糖尿病;下肢深静脉血栓形成;脂肪肝;后天性肾囊肿;前列腺结石	好转	孙辽军	陈华	蔡乐益	股骨植骨术;关节软骨修复术;股静脉穿刺术;下肢静脉滤器置入术;股骨骨折切开复位钢板内固定术
260	D10(创伤2)	2023-09-09	2023-09-17	3420484	陈波	男	44Y	开放性胫腓骨干骨折	静脉血栓形成;脂肪肝;手术后状态，其他特指的	好转	陈华	孙辽军	蔡乐益	胫骨植骨术;胫骨骨折切开复位钢板内固定术
261	D10(创伤2)	2023-09-02	2023-09-18	3420754	应国云	男	59Y	股骨粗隆下骨折	腰椎骨折;下肢深静脉血栓形成;心功能不全;手术后状态，其他特指的	好转	黄俊武	余贤斌	郑文浩	股骨骨折闭合复位髓内针内固定术
262	D10(创伤2)	2023-09-06	2023-09-21	3422284	高铭刊	男	74Y	股骨颈骨折	肝囊肿;胆囊结石;后天性肾囊肿;前列腺增生;前列腺囊肿;下肢静脉肌间血栓形成;高血压;脂肪肝	治愈	黄义星	黄义星	张儒	下腔静脉滤器取出术;下肢静脉造影;下腔静脉滤器置入术;股静脉穿刺术;人工股骨头置换术;髋轴面，金属与聚乙烯
263	D10(创伤2)	2023-09-09	2023-09-23	3422742	杨传西	男	81Y	胫腓骨闭合性骨折	脊椎松解;大手术个人史，不可归类在他处者;胆总管扩张;后天性肾囊肿;叶酸盐缺乏性贫血;下肢静脉肌间血栓形成	好转	陈华	孙辽军	蔡乐益	胫骨植骨术;胫骨骨折切开复位钢板内固定术
264	D10(创伤2)	2023-09-23	2023-09-30	3426205	徐雪华	女	62Y	桡骨远端骨折	肺炎;肺大疱;心功能不全;下肢静脉血栓形成;尺骨茎突骨折	好转	黄俊武	余贤斌	郑文浩	关节软骨修复术;桡骨骨折切开复位钢板内固定术
265	D10(创伤2)	2023-10-02	2023-10-12	3430302	陈林英	女	90Y	股骨粗隆间骨折	肺部感染;胸腔积液;心室过早除极;子宫肿物;陈旧性耻骨骨折;高血压;静脉血栓形成;心功能不全	好转	黄俊武	余贤斌	郑文浩	股骨骨折闭合复位髓内针内固定术
266	D10(创伤2)	2023-10-13	2023-10-21	3434490	刘任郎	男	69Y	髂骨骨折	胆囊息肉;髋关节退行性病变;下肢静脉曲张;泌尿器官诊断性影像检查的异常所见;下肢静脉血栓形成	治愈	石成弟	石成弟	卢迪	髂骨骨折切开复位钢板内固定术;髂骨人工骨植骨术
267	D10(创伤2)	2023-10-15	2023-10-23	3435191	郑爱珠	女	79Y	股骨颈骨折	2型糖尿病;骨质疏松;脂肪肝;后天性肾囊肿;下肢静脉肌间血栓形成;高血压	好转	陈华	孙辽军	蔡乐益	关节切开术;髋关节滑膜切除术;髋关节部分置换;髋轴面，陶瓷与金属
268	D10(创伤2)	2023-10-16	2023-10-28	3437145	李信椿	男	77Y	股骨粗隆间骨折	耻骨骨折;下肢静脉肌间血栓形成;前列腺增生;跟骨骨折	治愈	黄义星	黄义星	张儒	跟骨骨折切开复位钢板内固定术;股骨骨折闭合复位髓内针内固定术;跟骨人工骨植骨术
269	D10(创伤2)	2023-10-21	2023-10-30	3438105	李钗	女	74Y	股骨颈骨折	静脉血栓形成;高血压;骶髂关节炎，不可归类在他处者;2型糖尿病	好转	陈华	孙辽军	蔡乐益	髋关节滑膜切除术;全髋关节置换;髋轴面，陶瓷与陶瓷
270	D10(创伤2)	2023-10-23	2023-11-06	3441185	郑英兰	女	77Y	股骨假体周围骨折	股骨骨折;骨质疏松;髋关节置换术后;原发性甲状腺功能亢进症;下肢静脉肌间血栓形成;后天性肾囊肿;骨折治疗后恢复期	好转	陈华	孙辽军	蔡乐益	股骨骨折切开复位钢板内固定术
271	D10(创伤2)	2023-11-02	2023-11-07	3441761	陈均锡	男	62Y	股骨粗隆间骨折	下肢其他深部脉管的静脉炎和血栓性静脉炎;脂肪肝;后天性肾囊肿;肾结石;下肢静脉曲张	治愈	石成弟	石成弟	卢迪	股骨骨折闭合复位髓内针内固定术
272	D10(创伤2)	2023-11-04	2023-11-11	3443413	柳春妹	女	83Y	股骨粗隆间骨折	椎间盘移位，其他特指的;高血压;下肢静脉血栓形成;老年性脑萎缩;甲状腺结节;肝囊肿;2型糖尿病	好转	黄俊武	余贤斌	郑文浩	股骨骨折闭合复位髓内针内固定术;股骨骨折闭合复位术
273	D10(创伤2)	2023-11-08	2023-11-18	3446619	邵祝林	男	68Y	髂骨骨折	锁骨骨折;肩胛骨骨折;肋骨骨折;胸腔积液;创伤性湿肺;下肢静脉血栓形成;心功能不全;胆囊结石	好转	黄俊武	余贤斌	郑文浩	髂骨骨折切开复位钢板内固定术;肩胛骨骨折切开复位钢板内固定术
274	D10(创伤2)	2023-11-11	2023-11-18	3446735	谢秀英	女	88Y	股骨粗隆间骨折	特发性(原发性)高血压;2型糖尿病;静脉血栓形成;胸腔积液;肺部感染;脂肪肝;胆囊结石;后天性肾囊肿	好转	黄义星	黄义星	张儒	股骨骨折闭合复位髓内针内固定术
275	D10(创伤2)	2023-11-18	2023-11-25	3449787	夏小红	女	67Y	股骨颈骨折	高血压;心功能不全;脂肪肝;肺诊断性影像异常;胆囊结石;下肢静脉血栓形成	好转	黄俊武	余贤斌	郑文浩	全髋关节置换;髋关节滑膜切除术;髋轴面，陶瓷与金属
276	D10(创伤2)	2023-11-18	2023-11-27	3450783	黄从水	男	50Y	股骨颈骨折	下肢动脉粥样硬化;静脉血栓形成;肺诊断性影像异常;肺大疱	好转	黄俊武	余贤斌	郑文浩	全髋关节置换;髋关节滑膜切除术;关节切开术
277	D10(创伤2)	2023-11-18	2023-11-29	3451432	李花妹	女	65Y	股骨骨折	股骨髁间骨折;下肢静脉曲张;脂肪肝;2型糖尿病;下肢静脉肌间血栓形成	治愈	黄义星	黄义星	张儒	股骨骨折切开复位钢板内固定术;下肢静脉滤器置入术;下肢静脉造影;股骨人工骨植骨术
278	D10(创伤2)	2023-11-24	2023-12-03	3453138	周春莲	女	66Y	股骨颈骨折	高血压;心功能不全;下肢静脉血栓形成;退行性主动脉瓣疾患;心功能不全	治愈	陈华	孙辽军	陈春慧	全髋关节置换;髋关节滑膜切除术;关节切开术;髋轴面，陶瓷与陶瓷
279	D10(创伤2)	2023-11-30	2023-12-09	3455528	柯三妹	女	66Y	外踝骨折	心功能不全;下肢静脉血栓形成;高血压	治愈	陈华	孙辽军	陈春慧	踝关节骨折切开复位钢板内固定术;关节软骨修复术
280	D10(创伤2)	2023-12-04	2023-12-14	3458148	张青兰	女	74Y	股骨颈骨折	下肢静脉血栓形成;下肢动脉粥样硬化;高血压;糖尿病;胸椎退行性病变;肝囊肿;肾结石;后天性肾囊肿;心功能不全	好转	黄俊武	余贤斌	郑文浩	人工股骨头置换术;髋关节滑膜切除术;髋轴面，金属与聚乙烯
281	D10(创伤2)	2023-12-13	2023-12-23	3461562	林星进	男	102Y	股骨颈骨折	泌尿道感染;Ⅰ度房室传导阻滞;肺部感染;肺的其他疾患;肺不张;肝血管瘤;肝囊肿;后天性肾囊肿;胆囊结石;下肢静脉血栓形成	好转	黄俊武	余贤斌	郑文浩	人工股骨头置换术;髋关节滑膜切除术;髋轴面，金属与聚乙烯
282	D10(创伤2)	2023-12-17	2023-12-24	3462449	黄彩弟	女	86Y	股骨粗隆间骨折	支气管扩张伴感染;下肢静脉血栓形成;高血压;心功能不全	好转	黄俊武	余贤斌	郑文浩	股骨骨折闭合复位髓内针内固定术
283	D10(创伤2)	2023-12-19	2023-12-24	3462522	林阿花	女	91Y	股骨粗隆间骨折	头部的损伤;心功能不全;肺诊断性影像异常;甲状腺结节;胆管扩张;肝囊肿;下肢静脉肌间血栓形成	好转	陈华	陈华	陈春慧
284	D10(创伤2)	2023-12-16	2023-12-25	3462768	潘丽丽	女	79Y	肱骨近端骨折	肋骨骨折;高血压;甲状腺术后;胸腔积液;泌尿道感染;心功能不全;下肢动脉血栓形成;肺诊断性影像异常;脂肪肝;肝囊肿;胆囊结石;肩关节脱位	好转	黄俊武	余贤斌	郑文浩	肱骨骨折切开复位钢板内固定术;关节软骨修复术;肱骨人工骨植骨术
285	D10(创伤2)	2023-12-23	2023-12-31	3465264	陈学平	男	61Y	髋臼骨折	骨盆骨折;高血压;脑血栓形成;肝回声不均;肾结石;后天性肾囊肿;前列腺增生;心功能不全;创伤性髂腰肌血肿	治愈	陈华	孙辽军	陈春慧	骨盆骨折切开复位钢板内固定术;关节软骨修复术
286	D11(创伤3)	2022-12-22	2023-01-03	3314819	阮世从	男	80Y	髌骨骨折	下肢深静脉血栓形成;肝囊肿;胆囊息肉;肾结石;后天性肾囊肿;前列腺增生	治愈	王振文	水小龙	218241	股静脉穿刺术;下腔静脉滤器置入术;髌骨骨折切开复位张力带钢丝内固定术
287	D11(创伤3)	2023-01-07	2023-01-08	3316808	金苏花	女	68Y	耻骨骨折	腰椎退行性病变;骶骨骨折;肺挫伤;肝功能异常;下肢静脉血栓形成;脂肪肝;骨质疏松	未愈	潘骏	潘骏	卢迪
288	D11(创伤3)	2022-12-14	2023-01-16	3319807	梁月媚	女	56Y	股骨髁骨折	腘动脉损伤;腘静脉损伤;急性失血性贫血;髋和大腿水平坐骨神经损伤;下肢血管损伤;下肢静脉血栓形成;腰椎退行性病变;骨质增生;腰椎间盘突出;肺部感染;主动脉钙化;胸腔积液;创伤后伤口感染;开放性膝部损伤	治愈	潘骏	金海东	卢迪	创面负压封闭引流[VSD];动脉修补术;股骨骨折切开复位钢板内固定术;残端皮肤修整术;大腿离断术;下腔静脉滤器置入术
289	D11(创伤3)	2023-01-01	2023-01-16	3319832	潘永旺	男	77Y	开放性胫腓骨下端骨折	慢性胃炎;肾结石;肝囊肿;下肢静脉血栓形成;高血压病	治愈	王振文	水小龙	218241	胫骨骨折切开复位钢板内固定术;胫骨外固定架固定术;腓骨骨折切开复位钢板内固定术;胫骨外固定架去除术
290	D11(创伤3)	2023-01-13	2023-01-21	3322199	元茂志	男	59Y	髌骨骨折	脂肪肝;前列腺增生;下肢深静脉血栓形成;二尖瓣返流;心房肥大	治愈	洪建军	余洋	郑亦静	股静脉穿刺术;下腔静脉滤器置入术;髌骨骨折切开复位张力带钢丝内固定术
291	D11(创伤3)	2023-01-06	2023-01-22	3322439	虞世衡	男	69Y	股骨颈骨折	血小板减少症;高血压病;肾结石;下肢静脉血栓形成	治愈	余可和	何自力	何自力	人工股骨头置换术
292	D11(创伤3)	2023-01-24	2023-01-28	3325141	洪春兰	女	87Y	股骨粗隆间骨折	原发性肺动脉高压;下肢动脉粥样硬化;下肢静脉血栓形成;后天性肾囊肿;心功能不全	好转	王振文	水小龙	218241
293	D11(创伤3)	2023-01-20	2023-01-28	3325150	蒋大林	男	53Y	跖骨骨折	下肢静脉血栓形成;脂肪肝;胆囊息肉;后天性肾囊肿;前列腺结石	治愈	王振文	水小龙	218241	跖骨骨折切开复位钢板内固定术
294	D11(创伤3)	2023-01-30	2023-02-03	3328181	胡玉梅	女	66Y	外踝骨折	高血压病;脂肪肝;静脉栓塞和血栓形成	治愈	洪建军	余洋	郑亦静	关节软骨修复术;踝关节骨折切开复位钢板内固定术
295	D11(创伤3)	2023-01-27	2023-02-03	3328366	廖美蕊	女	79Y	股骨粗隆间骨折	骨质疏松;脑卒中后遗症;高血压病;肝囊肿;后天性肾囊肿;下肢静脉血栓形成	治愈	余可和	余可和	何自力	股骨骨折闭合复位螺钉内固定术
296	D11(创伤3)	2023-01-14	2023-02-04	3328760	叶夏菊	女	82Y	肱骨下端骨折	肺部感染;高血压病;子宫平滑肌瘤;下肢静脉血栓形成;陈旧性肋骨骨折;后天性肾囊肿;腰椎退行性病变	治愈	余可和	余可和	何自力	肱骨骨折切开复位钢板内固定术;桡神经松解术
297	D11(创伤3)	2023-02-01	2023-02-07	3329123	郑明花	女	78Y	股骨颈骨折	下肢静脉血栓形成;肾结石	治愈	王振文	水小龙	218241	髋关节滑膜切除术;人工股骨头置换术
298	D11(创伤3)	2023-01-25	2023-02-13	3330280	李长勇	男	44Y	股骨粗隆间骨折	桡骨下端骨折;下肢深静脉血栓形成;前列腺结石	治愈	王振文	水小龙	218241	下肢静脉造影;下腔静脉滤器取出术;股骨骨折切开复位髓内针内固定术;桡骨骨折切开复位钢板内固定术;下腔静脉滤器置入术;关节软骨修复术
299	D11(创伤3)	2023-02-10	2023-02-15	3330993	胡阿花	女	85Y	锁骨骨折	多发性肋骨骨折;腰椎骨折;创伤性气胸;后天性肾囊肿;肾结石;静脉栓塞和血栓形成	好转	洪建军	余洋	郑亦静
300	D11(创伤3)	2023-02-18	2023-02-25	3334922	林彩芽	女	75Y	股骨粗隆间骨折	下肢静脉血栓形成;肾结石;胆囊息肉	治愈	王振文	水小龙	218241	股骨骨折闭合复位髓内针内固定术
301	D11(创伤3)	2023-02-14	2023-02-26	3335450	郑松厚	男	62Y	股骨颈骨折	下肢深静脉血栓形成	治愈	洪建军	余洋	郑亦静	下腔静脉造影;下腔静脉滤器置入术;股骨骨折闭合复位髓内针内固定术
302	D11(创伤3)	2023-02-20	2023-02-27	3335895	蔡秀英	女	89Y	股骨粗隆间骨折	下肢动脉粥样硬化;静脉栓塞和血栓形成;胆囊息肉;后天性肾囊肿	治愈	洪建军	余洋	郑亦静	股骨骨折闭合复位髓内针内固定术
303	D11(创伤3)	2023-02-19	2023-02-28	3336231	林海珠	女	68Y	髌骨骨折	带状疱疹;下肢动脉粥样硬化;下肢静脉血栓形成;脂肪肝;原发性单侧膝关节病;慢性胃炎;肾衰竭;下肢静脉曲张	治愈	余可和	余可和	何自力	髌骨骨折切开复位张力带钢丝内固定术
304	D11(创伤3)	2023-02-11	2023-03-01	3336657	谢雪燕	女	60Y	股骨干骨折	股骨髁骨折;尺骨桡骨骨干骨折;多发性肋骨骨折;下肢动脉粥样硬化;原发性单侧膝关节病;腰椎间盘突出;腰椎退行性病变;颈椎退行性病变;头皮血肿;耻骨骨折;骨质疏松;肝功能不全;脂肪肝;下肢静脉血栓形成	治愈	余可和	余可和	何自力	尺骨骨折切开复位螺钉内固定术;关节软骨修复术;股骨骨折切开复位钢板内固定术;桡骨骨折切开复位钢板内固定术
305	D11(创伤3)	2023-02-25	2023-03-02	3337189	伍剑雄	男	72Y	闭合性胫骨平台骨折	后天性肾囊肿;高血压病;肝囊肿;下肢静脉血栓形成	治愈	冯永增	冯永增	218241	胫骨骨折切开复位钢板内固定术;胫骨植骨术
306	D11(创伤3)	2023-03-04	2023-03-11	3340694	林利云	女	63Y	股骨下端骨折	肾结石;下肢深静脉血栓形成;股骨髁骨折	好转	洪建军	余洋	郑亦静	股骨骨折闭合复位髓内针内固定术;下腔静脉滤器置入术;膝关节血肿清除术
307	D11(创伤3)	2023-02-23	2023-03-13	3341497	施瑞飞	男	64Y	股骨颈骨折	多处挫伤;头皮血肿;股骨粗隆间骨折;主动脉钙化;心包积液;冠状动脉粥样硬化;贫血;下肢静脉肌间血栓形成;肺动脉高压重度;风湿性三尖瓣关闭不全	治愈	潘骏	潘骏	卢迪	股骨骨折闭合复位髓内针内固定术
308	D11(创伤3)	2023-03-03	2023-03-13	3341514	朱林花	女	70Y	股骨下端骨折	肾结石;下肢静脉肌间血栓形成;高血压病;2型糖尿病;下肢深静脉血栓形成	治愈	水小龙	水小龙	218241	股骨骨折切开复位钢板内固定术
309	D11(创伤3)	2023-03-03	2023-03-16	3342784	陈容容	女	65Y	胫骨下端骨折	下肢静脉肌间血栓形成;高血压病	治愈	王振文	水小龙	218241	胫骨骨折切开复位钢板内固定术
310	D11(创伤3)	2023-03-10	2023-03-16	3342895	应丐香	女	78Y	股骨粗隆间骨折	股骨粗隆下骨折;下肢静脉肌间血栓形成;高血压病;2型糖尿病	治愈	洪建军	余洋	郑亦静	股骨骨折闭合复位髓内针内固定术
311	D11(创伤3)	2023-03-03	2023-03-16	3342921	林大纲	男	68Y	髋臼骨折	脑卒中后遗症;下肢静脉肌间血栓形成;老年性脑萎缩;2型糖尿病;前列腺结石;前列腺增生	治愈	水小龙	水小龙	218241	髋骨骨折切开复位钢板内固定术;髂骨切除术用作移植物;关节软骨修复术
312	D11(创伤3)	2023-03-11	2023-03-20	3344466	滕美凤	女	85Y	股骨粗隆间骨折	脂肪肝;后天性肾囊肿;下肢静脉肌间血栓形成;高血压病;老年性脑萎缩;肝囊肿	治愈	余可和	余可和	218019	股骨骨折闭合复位髓内针内固定术
313	D11(创伤3)	2023-03-23	2023-04-01	3349257	陈三豹	男	77Y	胫腓骨干骨折	肩袖损伤;下肢静脉肌间血栓形成	治愈	水小龙	水小龙	218241	胫骨骨折闭合复位髓内针内固定术
314	D11(创伤3)	2023-04-01	2023-04-17	3355371	杨芬蕊	女	64Y	股骨骨折	大隐静脉曲张;下肢静脉血栓形成;贫血;后天性肾囊肿;多发性肋骨骨折;胸椎骨折T11/T12;下肢静脉肌间血栓形成;坐骨骨折;跖骨骨折;跟骨骨折;三踝骨折;腰椎骨折	治愈	潘骏	潘骏	卢迪	股骨人工骨植骨术;股骨骨折切开复位钢板内固定术;股静脉穿刺术;下腔静脉滤器置入术
315	D11(创伤3)	2023-04-09	2023-04-18	3355839	叶宗道	男	85Y	股骨颈骨折	后天性肾囊肿;肾结石;下肢静脉肌间血栓形成;高血压病;肝胆管结石	治愈	水小龙	水小龙	218241	人工股骨头置换术;髋关节滑膜切除术
316	D11(创伤3)	2023-04-12	2023-04-20	3356730	陈香弟	女	90Y	股骨粗隆间骨折	下肢静脉肌间血栓形成;胆囊结石;高血压病;2型糖尿病;肝继发恶性肿瘤;胃恶性肿瘤	治愈	水小龙	水小龙	218241	股骨骨折闭合复位髓内针内固定术
317	D11(创伤3)	2023-04-19	2023-04-22	3357614	陈美娇	女	89Y	股骨颈骨折	多发性脑梗死;下肢静脉肌间血栓形成;高血压病;老年性脑萎缩;脱髓鞘性白质脑病	未愈	余可和	余可和	218019
318	D11(创伤3)	2023-04-28	2023-04-30	3361251	廖碎花	女	90Y	股骨颈骨折	肘部挫伤;下肢静脉肌间血栓形成;老年性痴呆	好转	水小龙	水小龙	218241
319	D11(创伤3)	2023-04-13	2023-05-02	3361870	何勤夫	男	60Y	胫骨近端骨折	锁骨骨折;低钾血症;后天性肾囊肿;下肢深静脉血栓形成;肺部感染;肾结石	治愈	余可和	余可和	王少华2	锁骨人工骨植骨术;下肢静脉造影;股静脉穿刺术;胫骨骨折切开复位钢板内固定术;锁骨骨折切开复位钢板内固定术;胫骨人工骨植骨术;下腔静脉滤器置入术
320	D11(创伤3)	2023-04-28	2023-05-06	3362846	沈小春	女	61Y	双踝骨折	下肢静脉肌间血栓形成;胆囊结石;高血压病;2型糖尿病;甲状腺结节;肺结节	治愈	潘骏	潘骏	金海东	踝关节骨折切开复位钢板内固定术;关节软骨修复术
321	D11(创伤3)	2023-05-01	2023-05-08	3363864	王春桃	女	82Y	股骨颈骨折	高血压病;2型糖尿病;肾缺如;下肢静脉血栓形成	治愈	水小龙	水小龙	周呈伟	人工股骨头置换术
322	D11(创伤3)	2023-05-13	2023-05-14	3366272	洪汝钦	男	42Y	髌骨骨折	下肢静脉肌间血栓形成;直背综合征;创伤后伤口感染;下肢静脉血栓形成;乙型病毒性肝炎	未愈	潘骏	潘骏	金海东
323	D11(创伤3)	2023-05-02	2023-05-20	3368566	徐玉香	女	85Y	股骨粗隆间骨折	糖尿病;脑肿物;腔隙性脑梗死;后天性肾囊肿;脑软化灶;高血压;下肢静脉肌间血栓形成	治愈	余可和	余可和	王少华2	股骨骨折闭合复位髓内针内固定术
324	D11(创伤3)	2023-05-10	2023-05-21	3369237	朱郁文	男	78Y	股骨颈骨折	后天性肾囊肿;前列腺结石;下肢静脉血栓形成;胆囊胆固醇沉着症	治愈	水小龙	水小龙	周呈伟	髋关节滑膜切除术;人工股骨头置换术
325	D11(创伤3)	2023-04-24	2023-05-28	3371970	周金生	男	70Y	开放性内踝骨折	前列腺增生;肝囊肿;孤立性肺结节;三角韧带断裂;下肢静脉肌间血栓形成;踝关节半脱位;外踝骨折;前列腺结石	治愈	潘骏	潘骏	金海东	皮肤和皮下坏死组织切除清创术;创面封闭式负压引流术（VSD）;踝关节骨折切开复位钢板内固定术;踝融合术;踝关节韧带修补术
326	D11(创伤3)	2023-06-04	2023-06-10	3377042	尤素燕	女	47Y	外踝骨折	下肢静脉肌间血栓形成;脂肪肝	治愈	洪建军	郑亦静	郑亦静	踝关节骨折切开复位螺钉内固定术
327	D11(创伤3)	2023-06-07	2023-06-17	3379827	苏宝珠	女	71Y	股骨颈骨折	后天性肾囊肿;下肢静脉肌间血栓形成	治愈	洪建军	卢晓郎	卢晓郎	全髋关节置换;髋关节滑膜切除术;髋轴面，陶瓷与聚乙烯
328	D11(创伤3)	2023-06-09	2023-06-17	3379952	王仁赓	男	71Y	股骨粗隆间骨折	尿毒症;后天性肾囊肿;下肢动脉粥样硬化;下肢静脉肌间血栓形成;高血压病;2型糖尿病	治愈	洪建军	卢晓郎	卢晓郎	股骨骨折闭合复位髓内针内固定术
329	D11(创伤3)	2023-05-14	2023-06-20	3381476	赵罗球	男	63Y	股骨粗隆间骨折	下肢静脉肌间血栓形成;后天性肾囊肿;创伤性硬脑膜外血肿;高血压;肺大疱;肾结石;颈椎退行性病变;老年性脑萎缩;创伤性蛛网膜下腔出血;脑挫伤;股骨骨折;枕骨骨折;胸腔积液;肺部感染	治愈	王振文	水小龙	徐宏威	股骨骨折切开复位钢板内固定术
330	D11(创伤3)	2023-06-18	2023-06-27	3384510	林爱莲	女	72Y	髌骨骨折	高血压;下肢静脉肌间血栓形成	好转	王振文	水小龙	徐宏威	髌骨骨折切开复位张力带钢丝内固定术
331	D11(创伤3)	2023-06-22	2023-07-01	3385996	周春梅	女	84Y	股骨粗隆间骨折	下肢静脉血栓形成;陈旧性肺结核;陈旧性胸椎骨折;胆囊结石	好转	王振文	水小龙	徐宏威	股骨骨折闭合复位髓内针内固定术
332	D11(创伤3)	2023-06-28	2023-07-06	3388330	徐立萍	女	70Y	跟骨骨折	高血压;2型糖尿病;后天性肾囊肿;下肢静脉肌间血栓形成	治愈	洪建军	郑亦静	郑亦静	关节软骨修复术;跟骨骨折切开复位钢板内固定术
333	D11(创伤3)	2023-06-28	2023-07-08	3388927	潘玉丹	女	69Y	股骨下端骨折	下肢静脉肌间血栓形成;脂肪肝;肺部结节	好转	王振文	水小龙	徐宏威	股骨骨折切开复位髓内针内固定术
334	D11(创伤3)	2023-07-06	2023-07-12	3391097	周美员	女	95Y	股骨颈骨折	下肢静脉曲张;下肢静脉肌间血栓形成	治愈	洪建军	郑亦静	郑亦静	髋关节滑膜切除术;人工股骨头置换术
335	D11(创伤3)	2023-07-05	2023-07-19	3394377	章小朋	男	86Y	股骨颈骨折	帕金森病;后天性肾囊肿;下肢静脉肌间血栓形成	治愈	王振文	水小龙	徐宏威	人工股骨头置换术
336	D11(创伤3)	2023-07-12	2023-07-24	3396546	杨彩凤	女	82Y	股骨颈骨折	高血压;下肢动脉粥样硬化;高脂血症;帕金森病;哮喘;失眠;骨折术后;眼术后;肝囊肿;肝钙化灶;下肢静脉肌间血栓形成	治愈	余可和	余可和	王少华2	髋关节滑膜切除术;人工股骨头置换术
337	D11(创伤3)	2023-07-12	2023-07-29	3398695	王兴华	男	57Y	开放性内踝骨折	慢性乙型丁型病毒性肝炎;下肢静脉肌间血栓形成	治愈	余可和	余可和	王少华2	游离皮肤移植;创面封闭式负压引流术（VSD）;皮肤和皮下坏死组织切除清创术;肌腱、血管、神经探查术;踝关节骨折切开复位钢板内固定术
338	D11(创伤3)	2023-07-18	2023-07-31	3399567	张美牙	女	84Y	股骨粗隆间骨折	高血压;2型糖尿病;具有心脏起搏器;肺恶性肿瘤;下肢静脉肌间血栓形成	治愈	王振文	水小龙	徐宏威	股骨骨折闭合复位髓内针内固定术
339	D11(创伤3)	2023-07-26	2023-08-06	3402627	王烈群	男	50Y	腰椎骨折L1	骶骨骨折;尾骨骨折;下肢静脉肌间血栓形成;跟骨骨折;腰部脊髓功能损伤;胸椎棘突骨折	治愈	王振文	水小龙	徐宏威	腰椎骨折切开复位内固定术;关节软骨修复术;跟骨骨折切开复位钢板内固定术
340	D11(创伤3)	2023-08-12	2023-09-09	3417118	王靖尧	男	57Y	足趾挤压伤	踝和足神经损伤;拇指开放性损伤伴指甲损伤;跖骨骨折;下肢静脉血栓形成;踝和足血管损伤;创伤后伤口感染	治愈	王振文	水小龙	徐宏威	皮肤和皮下坏死组织切除清创术;经足截断术;残端皮肤修整术;创面封闭式负压引流术（VSD)
341	D11(创伤3)	2023-09-05	2023-09-12	3418794	敖有凤	女	64Y	胫骨平台骨折	肾结石;主动脉钙化;低钾血症;心功能不全;下肢静脉肌间血栓形成;肝回声不均	治愈	王振文	水小龙	徐宏威	胫骨人工骨植骨术;胫骨骨折切开复位钢板内固定术;关节软骨修复术
342	D11(创伤3)	2023-09-05	2023-09-19	3421332	戴爱莲	女	61Y	胫骨平台骨折	心功能不全;下肢静脉肌间血栓形成;脑卒中后遗症;肾结石;后天性肾囊肿;肝囊肿;脂肪肝;高血压	治愈	王振文	水小龙	徐宏威	胫骨骨折切开复位钢板内固定术;关节软骨修复术
343	D11(创伤3)	2023-09-05	2023-09-20	3421752	徐银富	男	77Y	股骨粗隆下骨折	高血压;偏瘫;肺占位性病变;肝囊肿;后天性肾囊肿;前列腺结石;前列腺增生;下肢深静脉血栓形成;下肢静脉肌间血栓形成;失血性休克;肺部感染;肺门淋巴结肿大;纵隔淋巴结肿大;下肢动脉粥样硬化	治愈	王振文	水小龙	徐宏威	股骨骨折切开复位髓内针内固定术
344	D11(创伤3)	2023-09-12	2023-10-09	3428969	蒙仁丰	男	48Y	股骨粗隆下骨折	髋臼骨折;下肢静脉肌间血栓形成;局部淋巴结肿大;髂骨骨折;锁骨骨折	治愈	余可和	胡炜	高叶	下肢肌腱缝合术;股骨植骨术;股骨骨折闭合复位髓内针内固定术;骨盆骨折切开复位钢板内固定术
345	D11(创伤3)	2023-10-01	2023-10-14	3431070	李建国	男	56Y	肩锁关节脱位	陈旧性肩胛骨骨折;骨折术后;胆囊切除术后状态;陈旧性肋骨骨折;脂肪肝;下肢静脉肌间血栓形成;下肢静脉曲张	治愈	王振文	水小龙	徐宏威	肩锁关节脱位切开复位内固定术;肩关节的其他修补术
346	D11(创伤3)	2023-10-02	2023-10-18	3433031	李细香	女	54Y	开放性足损伤	2型糖尿病足;腰椎间盘突出;踝挫伤;踝和足腓深神经损伤;肋骨骨折;拇趾骨折;下肢静脉肌间血栓形成;肾盂积水;后天性肾囊肿;肝回声不均	治愈	余可和	胡炜	胡炜	足血管、神经、肌腱探查术;皮肤和皮下坏死组织切除清创术;腓肠神经吻合术;游离皮肤移植
347	D11(创伤3)	2023-10-29	2023-10-31	3438835	陈崇香	女	87Y	股骨颈骨折	肋骨骨折;胆囊结石伴胆囊炎;肝囊肿;下肢静脉肌间血栓形成;高血压;下肢动脉硬化闭塞症	好转	潘骏	潘骏	金海东
348	D11(创伤3)	2023-11-03	2023-11-11	3443386	蒋祝周	女	69Y	锁骨骨折	肩锁关节脱位;第一掌骨基底骨折;胫骨平台骨折;下肢静脉肌间血栓形成;膝外侧半月板损伤;膝内侧半月板损伤;脂肪肝;膝关节副韧带损伤	治愈	洪建军	卢晓郎		锁骨骨折切开复位钢板内固定术;掌骨骨折切开复位钢针内固定术;掌骨植骨术;关节软骨修复术;肩锁关节脱位切开复位内固定术
349	D11(创伤3)	2023-11-10	2023-11-30	3451960	黄建辉	男	45Y	开放性胫腓骨下端骨折	髋臼骨折;耻骨骨折;跖骨基底骨折;胫后神经损伤;肝钙化灶;肾结石;肾包膜下积液;胫后动脉损伤;胫后动脉血栓形成;跟腱断裂;胫腓远端韧带损伤;创伤性骨筋膜室综合征;坐骨神经损伤;楔状骨骨折(足);骰骨骨折;跟骨骨折;趾肌腱断裂	治愈	余可和	余可和	胡炜	腓骨骨折切开复位钢板内固定术;胫骨骨折切开复位钢板内固定术;踝融合术;下肢肌腱缝合术;髌韧带缝合术;筋膜间隙切开减压术;股骨髁上牵引;石膏托固定术;跟腱缝合术;胫骨开放性骨折清创术;胫神经缝合术;胫动脉缝合术;肌腱、血管、神经探查术;髋骨骨折切开复位钢板内固定术
350	D11(创伤3)	2023-12-01	2023-12-14	3458211	胥建刚	男	42Y	股骨下端骨折	胫骨平台骨折;耻骨骨折;强直性脊柱炎;原发性单侧膝关节病;葡萄膜炎[色素膜炎];肺炎;后天性肾囊肿;下肢静脉肌间血栓形成	治愈	孔建中	胡炜	陈墨川	股骨骨折切开复位钢板内固定术
351	D11(创伤3)	2023-11-15	2023-12-16	3458591	张化民	男	75Y	胫腓骨干骨折	小腿开放性伤口;创伤后伤口感染;下肢静脉肌间血栓形成;脂肪肝;后天性肾囊肿;前列腺结石	治愈	洪建军	卢晓郎	卢晓郎	胫骨骨折切开复位螺钉内固定术;踝融合术;腓骨骨折切开复位钢板内固定术;皮肤和皮下坏死组织切除清创术;创面封闭式负压引流术（VSD);胫骨外固定术
352	D11(创伤3)	2023-11-21	2023-12-17	3459177	李细香	女	54Y	胫骨平台伴腓骨骨折	2型糖尿病;肝回声不均;后天性肾囊肿;下肢静脉肌间血栓形成;足裂伤;拇趾骨折;腓肠神经损伤;肋骨骨折;腰椎间盘突出;股神经损伤;闭孔神经损伤;膝半月板撕裂;膝关节内侧副韧带损伤;膝关节外侧副韧带损伤;原发性单侧膝关节病;膝关节积液;滑膜增生	治愈	洪建军	卢晓郎	卢晓郎	胫骨骨折切开复位钢板内固定术;关节软骨修复术;胫骨人工骨植骨术;膝关节半月板成形术
353	D11(创伤3)	2023-12-13	2023-12-20	3460528	谢钗妹	男	83Y	髌骨骨折	膝关节退行性病变;后天性肾囊肿;下肢静脉肌间血栓形成	治愈	王振文	水小龙	郑亦静	髌骨骨折切开复位张力带钢丝内固定术;关节软骨修复术;下腔静脉滤器置入术;下肢静脉造影;髌韧带缝合术
354	D11(创伤3)	2023-12-19	2023-12-30	3465010	陈翠弟	女	79Y	骨折内固定装置障碍	膝关节退行性病变;高血压;肺诊断性影像异常;脂肪肝;后天性肾囊肿;下肢动脉粥样硬化;陈旧性肋骨骨折;甲状腺结节;肾错构瘤;胸腔积液;下肢静脉肌间血栓形成	治愈	余洋	郑亦静	郑亦静	股骨内固定装置去除术
355	D12(手外)	2023-01-18	2023-01-30	3325952	虞云良	男	64Y	特指趾骨骨折	下肢静脉血栓形成;前列腺结石	治愈	高伟阳	褚庭纲	褚庭纲	下腔静脉滤器置入术;股静脉穿刺置管术;趾骨骨折切开复位钢针内固定术
356	D12(手外)	2023-01-25	2023-03-18	3343449	严其龙	男	65Y	开放性足损伤	心功能不全;胫腓远端韧带损伤;踝部韧带断裂;闭合性胫骨平台骨折;大腿挫伤;下肢动脉粥样硬化;肝囊肿;肺部感染;肺大泡;肺气肿;下肢深静脉血栓形成	治愈	李志杰	褚庭纲	218324	创面封闭式负压引流术（VSD);皮肤和皮下坏死组织切除清创术;旋转皮瓣移植术;中厚皮片移植术;皮肤和皮下组织非切除性清创;皮肤伤口切除性清创术
357	D12(手外)	2023-03-24	2023-04-08	3351636	胡必正	男	67Y	胫骨骨折	陈旧性肋骨骨折;下肢静脉血栓形成;皮肤挫伤;下肢动脉粥样硬化	治愈	余可和	余可和	218019	胫骨人工骨植骨术;胫骨骨折切开复位钢板内固定术
358	D12(手外)	2023-08-17	2023-08-26	3411438	高小花	女	56Y	尺骨茎突骨折伴桡骨远端骨折	肋骨骨折;肾结石;下肢静脉血栓形成	治愈	李志杰	吴志鹏	王安远	上肢关节囊缝合术;桡骨骨折切开复位钢板内固定术
359	D12(手外)	2023-10-05	2023-10-14	3431034	黄娟弟	女	79Y	肱骨髁上骨折	肘关节关节病;肺诊断性影像检查的异常所见;脊椎退行性病变;尺骨鹰嘴骨折;肘管综合征;胆囊结石;主动脉瓣疾患，其他的;二尖瓣反流;下肢静脉血栓形成	治愈	王振文	余洋	徐宏威	肱骨骨折切开复位钢板内固定术;尺神经松解术
360	D12(手外)	2023-09-27	2023-10-25	3436195	林碎妹	女	54Y	创伤后伤口感染	2型糖尿病;盆腔积液;肺诊断性影像异常;下肢静脉血栓形成;髋臼骨折;膝挫伤;骶髂关节脱位;耻骨骨折;肩胛骨骨折;锁骨肩峰端骨折;两根肋骨骨折不伴第一肋骨骨折;寰椎骨折;颈部脊髓损伤	好转	虞庆	虞庆	史吏	皮肤和皮下坏死组织切除清创术;带蒂皮瓣移植术;创面封闭式负压引流术（VSD)
361	D12(手外)	2023-10-24	2023-12-09	3455613	李志树	男	53Y	开放性肱骨骨折	上臂开放性伤口;肱二头肌肌肉和肌腱损伤;上臂桡神经损伤;创伤性胸腔积液;下肢动脉粥样硬化;下肢静脉曲张;下肢静脉血栓形成;肺的其他疾患;在肩和上臂水平的其他肌肉和肌腱损伤	治愈	闫合德	周飞亚	陶振宇	肱骨外固定术;桡神经缝合术;全厚皮片移植术;皮肤和皮下坏死组织切除清创术;皮肤和皮下组织异物切开取出术;肱二头肌缝合术;上肢肌肉缝合术;肱骨人工骨植骨术;创面封闭式负压引流术（VSD);皮肤和皮下坏死组织切除清创术;创面封闭式负压引流术（VSD)
362	D13(手外)	2023-01-08	2023-01-17	3320389	陈月娥	女	76Y	尺骨桡骨远端骨折	腕关节关节病;下肢动脉粥样硬化;下肢静脉曲张;下肢静脉血栓形成;脂肪肝;肝囊肿	治愈	陈星隆	王安远	王安远	尺骨骨折切开复位螺钉内固定术;桡骨骨折切开复位术
363	D13(手外)	2023-05-14	2023-05-23	3370111	彭阿凤	女	78Y	尺骨远端骨折伴桡骨远端骨折	后天性肾囊肿;肾上腺皮质增生;高血压;胆囊息肉;肝囊肿;肺部感染;下肢静脉血栓形成;主动脉钙化;心功能不全	治愈	陈星隆	丁健	周宗伟	尺骨外固定术;桡骨骨折闭合复位螺钉内固定术
364	D13(手外)	2023-09-11	2023-10-09	3428978	方纪法	男	54Y	手术后切口感染	开放性胫腓骨干骨折;下肢皮肤撕裂伤;肋骨骨折;肝炎后肝硬化;下肢静脉血栓形成;脾大;胆囊结石;胆囊息肉;肾结石;胸腔积液;心功能不全	好转	闫合德	褚庭纲	郑增明	胫骨病损切除术;筋膜折叠术;中厚皮片移植术
365	D13(手外)	2023-10-05	2023-11-17	3446156	李丽芬	女	48Y	开放性掌骨骨折	上肢皮肤裂伤;下肢静脉炎和血栓性静脉炎;心功能不全;二尖瓣反流	治愈	蒋良福	李士	陶振宇	带蒂皮瓣移植术;掌骨骨折切开复位钢板内固定术;创面封闭式负压引流术（VSD);创面封闭式负压引流术（VSD);手肌腱、血管、神经探查术;皮肤和皮下组织非切除性清创
366	D13(手外)	2023-12-02	2023-12-16	3458652	郑千弟	女	74Y	肱骨骨折	皮肤裂伤;下肢动脉粥样硬化;静脉栓塞和血栓形成;慢性咽峡炎	治愈	蒋良福	蒋良福	张里练	肱骨骨折切开复位钢板内固定术;桡神经松解术
367	D14(脊柱)	2023-01-04	2023-01-10	3317432	黄永锁	男	89Y	腰椎骨折	腰骶椎间盘突出;肺恶性肿瘤;后天性肾囊肿;肾结石;前列腺增生;下肢静脉血栓形成	治愈	徐晖	许聪	许聪	腰椎骨折球囊扩张成形术
368	D14(脊柱)	2023-01-14	2023-01-21	3321908	赵朱连	女	80Y	胸椎骨折	胆囊结石;后天性肾囊肿;陈旧性胸椎骨折;下肢静脉血栓形成;骨质疏松	治愈	倪文飞	窦海成	窦海成	经皮穿刺脊柱后凸成形术
369	D14(脊柱)	2023-01-07	2023-01-22	3322477	蒋生相	男	46Y	多发性腰椎骨折	腰骶椎间盘突出;腹部、下背和骨盆特指损伤;肺特指疾患;创伤性肾周血肿;溺水;腰椎椎管狭窄;腓骨骨折;内踝骨折;吸入性肺炎;呼吸衰竭;下肢静脉血栓形成	好转	武垚森	王胜	武垚森	脊椎骨折复位术;后入路腰椎融合术;关节软骨修复术;踝关节骨折切开复位钢板内固定术;髂骨取骨术;金属脊椎融合物置入术;2-3块椎骨融合;后入路腰椎间盘切除术;腰椎椎板切除减压术
370	D14(脊柱)	2023-01-17	2023-01-25	3323850	陈淑华	女	65Y	腰椎骨折	骨质疏松;人工膝关节;高血压病;脂肪肝;下肢静脉血栓形成;肺部阴影	治愈	徐晖	许聪	许聪	腰椎骨折球囊扩张成形术
371	D14(脊柱)	2023-02-16	2023-02-22	3334150	虞茶味	女	67Y	胸椎骨折	耻骨骨折;尺骨茎突骨折;下肢静脉血栓形成;胸椎退行性病变;腰椎退行性病变;脊柱压缩性骨折;桡骨下端骨折	治愈	黄其杉	盛孙仁	盛孙仁	胸椎骨折球囊扩张成形术
372	D14(脊柱)	2023-02-20	2023-02-25	3335063	陈权弟	男	84Y	腰椎骨折	骨质疏松;肺部感染;恶性肿瘤个人史;后天性肾囊肿;肺动脉高压中度;下肢动脉粥样硬化;下肢静脉血栓形成	治愈	武垚森	王胜	武垚森	腰椎骨折球囊扩张成形术
373	D14(脊柱)	2023-02-26	2023-03-04	3337873	潘成	男	62Y	胸椎骨折	下肢动脉粥样硬化;腰骶椎间盘突出;腰椎退行性病变;胸椎退行性病变;颈椎退行性病变;腰椎峡部裂;脊椎前移;骨质疏松;下肢静脉血栓形成	治愈	武垚森	王胜	武垚森	胸椎骨折球囊扩张成形术
374	D14(脊柱)	2023-02-25	2023-03-07	3339175	季标妹	女	75Y	腰椎骨折	脊椎退行性病变;下肢静脉血栓形成;脂肪肝;骨质疏松;腰背部挫伤;高血压病;脊柱侧弯;腰椎间盘突出;施莫尔结;下肢动脉粥样硬化;后天性肾囊肿	治愈	徐晖	徐晖	张迪	腰椎骨折球囊扩张成形术
375	D14(脊柱)	2023-02-28	2023-03-07	3339298	陈林桃	女	71Y	胸椎骨折	后天性肾囊肿;肾结石;腰骶椎间盘突出;脊椎病;胆囊结石;多发性肝囊肿;腰椎骨折;脂肪肝;下肢静脉血栓形成	好转	黄其杉	黄其杉	窦海成	经皮穿刺脊柱后凸成形术
376	D14(脊柱)	2023-03-05	2023-03-11	3340564	孙婷婷	女	68Y	胸椎骨折	陈旧性腰椎骨折;后天性肾囊肿;肾超声检查异常;腰椎骨折L1;良性脂肪瘤样肿瘤;肺部阴影;骨质疏松;脂肪肝;下肢静脉血栓形成	治愈	黄其杉	黄其杉	窦海成	经皮穿刺脊柱后凸成形术
377	D14(脊柱)	2023-02-11	2023-03-11	3340779	兰秋梅	女	64Y	颈部脊髓损伤	头部浅表损伤;肺不张;颈椎间盘突出;颈椎椎管狭窄;颈椎骨折;肺部感染;胸腔积液;下肢静脉血栓形成	好转	徐晖	徐晖	张迪	颈椎后路单开门椎管减压术
378	D14(脊柱)	2023-03-06	2023-03-11	3340913	季红兰	女	61Y	胸椎骨折	肾结石;房间隔缺损;腰椎退行性病变;腰背部挫伤;小腿挫伤;腰椎骨折;骨质疏松;下肢静脉血栓形成	治愈	武垚森	王胜	武垚森	经皮穿刺脊柱后凸成形术
379	D14(脊柱)	2023-03-11	2023-03-16	3342935	张美香	女	67Y	腰椎骨折	后天性肾囊肿;腰椎间盘突出;高血压病;骨质疏松;脂肪肝;下肢静脉曲张;下肢静脉血栓形成	治愈	徐晖	徐晖	张迪	腰椎骨折球囊扩张成形术
380	D14(脊柱)	2023-03-08	2023-03-25	3346439	徐宗福	男	77Y	腰椎骨折	下肢静脉血栓形成;后天性肾囊肿;肾结石;腰椎间盘突出;腰椎椎管狭窄;腰椎滑脱;脊椎前移;骨质疏松;前列腺结石;前列腺增生;胆囊息肉	好转	黄其杉	窦海成	窦海成	椎弓根钉内固定术;椎管内病损切除术;腰椎椎板切除减压术
381	D14(脊柱)	2023-03-27	2023-04-01	3349204	张联余	男	69Y	胸椎骨折	陈旧性腰椎骨折;下肢动脉粥样硬化;退行性主动脉瓣疾患;主动脉瓣关闭不全;2型糖尿病;骨质疏松;肺部感染;下肢静脉血栓形成;心功能不全	治愈	王向阳	盛孙仁	盛孙仁	胸椎骨折球囊扩张成形术
382	D14(脊柱)	2023-03-13	2023-04-01	3349223	孔繁财	男	53Y	颈部脊髓损伤	胸椎骨折;眶骨骨折;颞骨骨折;颅底骨折;额骨骨折;下肢静脉血栓形成;下肢深静脉血栓形成;上颌窦骨折;颧弓骨折;腰椎骨折L1;创伤性胸腔积液;颅腔积气;颈椎间盘突出;多处挫伤;头皮血肿;创伤性蛛网膜下腔出血;创伤性硬膜外血肿;脑挫伤	好转	倪文飞	倪文飞	许聪	2-3个椎骨融合或再融合;金属脊椎融合物置入术;前入路颈椎融合术;前入路颈椎间盘切除术
383	D14(脊柱)	2023-03-05	2023-04-02	3349686	陈知花	女	71Y	多发性腰椎骨折	第二颈椎骨折;冠状动脉支架植入后状态;脑梗死;腰背部挫伤;头皮挫伤;肾挫伤;创伤性膈破裂;胫骨骨折;脂肪肝;胸腔积液;肺炎;下肢静脉血栓形成;心功能不全;小腿前部肌群和肌腱损伤	好转	武垚森	王胜	武垚森	腰椎骨折切开复位内固定术;股静脉穿刺术;下肢肌肉缝合术;胫骨骨折切开复位钢板内固定术;下腔静脉滤器取出术;下腔静脉滤器置入术
384	D14(脊柱)	2023-02-25	2023-04-03	3350098	潘升亮	男	63Y	多发性胸椎骨折	甲状腺囊肿;下肢静脉血栓形成;后天性肾囊肿;肾结石;头部浅表损伤;多发性肋骨骨折;下肢动脉粥样硬化;腰椎间盘突出;腰椎退行性病变;创伤性血气胸;胸腔积液;肺大泡;肺气肿;创伤性截瘫	好转	武垚森	王胜	武垚森	金属脊椎融合物置入术;胸椎融合术，后入路;胸椎椎板切除减压术;2-3个椎骨融合或再融合
385	D14(脊柱)	2023-04-01	2023-04-05	3351034	王岩媚	女	78Y	腰椎骨折	脂肪肝;下肢静脉血栓形成;肾超声检查异常;肝回声不均;肝和胆道影像检查异常;骨质疏松	治愈	倪文飞	倪文飞	许聪	腰椎骨折球囊扩张成形术
386	D14(脊柱)	2023-03-30	2023-04-10	3352737	卢衍芬	男	67Y	取除骨折内固定装置	腰椎退行性病变;高血压病;前列腺结石;前列腺增生;下肢静脉血栓形成	其他	徐晖	徐晖	张迪	椎骨内固定物取出术
387	D14(脊柱)	2023-04-16	2023-04-22	3357534	郑月娥	女	69Y	胸椎骨折	颈动脉硬化;多发性脑梗死;腰椎间盘突出;脊椎退行性病变;高血压病;老年性脑萎缩;创伤性硬膜外血肿;骨质疏松;胆囊息肉;脂肪肝;胸腔积液;下肢静脉血栓形成;心功能不全;糖尿病	治愈	武垚森	王胜	武垚森	胸椎骨折球囊扩张成形术
388	D14(脊柱)	2023-04-20	2023-04-29	3360544	胡金钗	女	80Y	骨质疏松伴病理性骨折	胆囊结石;下肢静脉血栓形成;下肢动脉粥样硬化	治愈	黄其杉	窦海成	窦海成	经皮穿刺脊柱后凸成形术
389	D14(脊柱)	2023-04-23	2023-04-30	3361138	邵取学	男	46Y	腰椎骨折L1	肾结石;腰部脊髓特指损伤;创伤性胸腔积液;腰椎椎管狭窄;坠积性肺炎;下肢静脉血栓形成	治愈	黄其杉	窦海成	窦海成	腰椎骨折切开复位内固定术;椎管减压术
390	D14(脊柱)	2023-05-13	2023-05-20	3368764	林碎妹	女	78Y	腰椎骨折L1	后天性肾囊肿;肝回声不均;脊柱术后;下肢动脉粥样硬化;高血压;骨质疏松，其他的;胸椎退行性病变;胸椎楔形变;脊柱侧弯;原发性肺动脉高压;脂肪肝;静脉石;下肢静脉血栓形成;冠状动脉粥样硬化性心脏病	治愈	徐晖	徐晖	张迪	腰椎骨折球囊扩张成形术
391	D14(脊柱)	2023-05-14	2023-05-24	3370565	刘兴桂	男	79Y	腰椎骨折L2	手术后状态，其他特指的;单侧小肾;肾结石;肝回声不均;高血压;下肢静脉血栓形成;腰椎退行性病变;胸椎退行性病变;躯干血管瘤;脑梗死;骨质疏松，其他的	治愈	徐晖	徐晖	张迪	腰椎骨折球囊扩张成形术
392	D14(脊柱)	2023-05-05	2023-05-31	3373444	林洪焕	男	74Y	颈椎骨折C4	脑萎缩;颈部挫伤;下肢动脉粥样硬化;高血压;颈椎间盘突出;脊椎退行性病变;脊髓型颈椎病;腰椎滑脱;溺水;颈部脊髓损伤;头皮挫伤;呼吸衰竭;腹水;腰椎峡部裂;肺部感染;肺水肿;胸腔积液;吸入性肺炎;下肢静脉血栓形成;脊髓变性	好转	徐晖	王胜	王胜	前入路颈椎间盘切除术;4-8个椎骨融合或再融合;金属脊椎融合物置入术;前入路颈椎融合术
393	D14(脊柱)	2023-06-10	2023-06-17	3379999	张招弟	女	73Y	骨质疏松伴有病理性骨折	下肢静脉血栓形成;脑血管病;糖尿病;后天性肾囊肿;腰椎术后;胸椎术后	治愈	倪文飞	倪文飞	许聪	腰椎骨折球囊扩张成形术
394	D14(脊柱)	2023-06-14	2023-06-19	3380975	李宝香	女	81Y	骨质疏松伴有病理性骨折	陈旧性腰椎骨折;高血压;肝囊肿;下肢静脉血栓形成;肝血管瘤	好转	倪文飞	许聪	许聪	腰椎骨折球囊扩张成形术
395	D14(脊柱)	2023-06-19	2023-07-01	3386026	蓝朝斌	男	41Y	腰椎骨折L1	高脂血症;下肢静脉血栓形成;创伤性截瘫;腰椎退行性病变;肺大疱;创伤性湿肺;前列腺钙化灶;脂肪肝	治愈	倪文飞	徐晖	周凯亮	2-3个椎骨融合或再融合;金属脊椎融合物置入术;腰椎椎板切除减压术;腰椎椎体间融合术，后入路
396	D14(脊柱)	2023-07-01	2023-07-10	3390088	邹钊东	男	52Y	颈椎病	面部软组织挫伤;腰椎退行性病变;腰骶椎间盘突出;老年性心脏瓣膜病;脂肪肝;肘关节关节病;颈部脊髓损伤;颈椎间盘突出;骨折术后;下肢静脉血栓形成;肋骨骨折;肺气肿合并肺大泡;胸腔积液;肾结石	治愈	黄其杉	黄其杉	张迪	2-3个椎骨融合或再融合;前入路颈椎间盘切除术;前入路颈椎融合术;金属脊椎融合物置入术
397	D14(脊柱)	2023-07-08	2023-07-13	3391706	金訚訚	女	73Y	胸椎骨折	高血压;糖尿病;半月板撕裂，近期的;胆囊结石;下肢静脉血栓形成;骨质疏松，其他的;胸椎退行性病变;腰椎退行性病变;腰骶椎间盘突出	治愈	黄其杉	黄其杉	张迪	经皮穿刺脊柱后凸成形术
398	D14(脊柱)	2023-07-11	2023-07-18	3394034	陈士钦	男	84Y	病理性骨折，不可归类在他处者	后天性肾囊肿;前列腺增生;下肢动脉粥样硬化;下肢静脉血栓形成;腰椎退行性病变;腰骶椎间盘突出;肺气肿;胆囊结石	治愈	徐晖	徐晖	周凯亮	胸椎骨折球囊扩张成形术;腰椎骨折球囊扩张成形术
399	D14(脊柱)	2023-07-24	2023-07-28	3398361	林宏英	女	69Y	骨质疏松伴有病理性骨折	腰椎术后;腰椎退行性病变;胸椎退行性病变;脂肪肝;肾缺如;下肢静脉血栓形成	治愈	黄其杉	黄其杉	张迪	经皮穿刺脊柱后凸成形术
400	D14(脊柱)	2023-07-22	2023-08-05	3401983	倪时康	男	65Y	颈部脊髓损伤	腰骶椎间盘突出;肝硬变;创伤性气胸;肺挫伤;肾挛缩;下肢静脉血栓形成;肺气肿;创伤性胸腔积液;头皮血肿;颈椎退行性病变;胸椎退行性病变;腰椎退行性病变;肝回声不均;肾积水伴输尿管结石;颈椎多发性骨折;颈椎脱位;胸部脊髓损伤;胸骨骨折	好转	徐晖	田乃锋	周凯亮	椎管减压术;后入路颈椎融合术;椎体次全切除伴椎间盘切除术;前入路颈椎融合术;颈椎脱位闭合复位术;金属脊椎融合物置入术;4-8个椎骨融合或再融合
401	D14(脊柱)	2023-08-08	2023-08-13	3405708	陈珍莲	女	80Y	胸椎骨折	多发性腰椎骨折;下肢静脉血栓形成;脑出血后遗症;高血压;盲，单眼;腰椎间盘突出;脂肪肝;胆囊结石;二尖(瓣)关闭不全;退行性主动脉瓣疾患;主动脉瓣狭窄	治愈	徐晖	田乃锋	周凯亮	经皮穿刺脊柱后凸成形术
402	D14(脊柱)	2023-08-26	2023-08-28	3412314	李洪廷	男	87Y	腰痛	下肢静脉血栓形成;高血压;慢性肾功能不全;胃术后;腰椎骨折	好转	黄其杉	黄其杉	张迪
403	D14(脊柱)	2023-08-26	2023-08-30	3413285	吴宪铭	男	92Y	腰椎骨折	胸椎退行性病变;腰椎退行性病变;后天性腰椎滑脱;腰骶椎间盘突出;下肢静脉血栓形成;老年性脑萎缩;肺部感染;肝回声不均;前列腺结石;前列腺增生;胸腔积液;肝囊肿;前列腺钙化灶	治愈	王胜	田乃锋	周凯亮	腰椎骨折球囊扩张成形术
404	D14(脊柱)	2023-08-26	2023-08-31	3413753	叶连妹	女	73Y	腰椎骨折	骶骨骨折;腰椎退行性病变;腰骶椎间盘突出;高血压;脂肪肝;骨质疏松，其他的;下肢静脉血栓形成;先天性腰椎隐裂	治愈	黄其杉	黄其杉	张迪	经皮穿刺脊柱后凸成形术
405	D14(脊柱)	2023-08-30	2023-09-03	3414866	李梅娟	女	79Y	胸椎多处骨折	高血压;帕金森病;下肢静脉血栓形成;胸椎退行性病变;糖尿病	治愈	倪文飞	田乃锋	周凯亮	胸椎骨折球囊扩张成形术
406	D14(脊柱)	2023-09-03	2023-09-09	3417322	黄忠敏	男	60Y	胸椎多处骨折	腰椎退行性病变;胸椎退行性病变;头皮血肿;下肢静脉血栓形成;肺大疱;头部的损伤;胸椎椎管狭窄;腰骶椎间盘突出	治愈	倪文飞	倪文飞	周凯亮	经皮穿刺脊柱后凸成形术
407	D14(脊柱)	2023-09-12	2023-09-28	3425411	夏凤妹	女	79Y	颈部脊髓损伤	第二颈椎骨折;颈椎脱位;颈椎椎管狭窄;颈椎退行性病变;颈部挫伤;下肢静脉血栓形成	好转	徐晖	徐晖	许聪	Halo-Vest架外固定术;颅骨牵引术
408	D14(脊柱)	2023-09-12	2023-09-30	3426398	张松青	男	54Y	开放性胫腓骨干骨折	脂肪肝;后天性肾囊肿;前列腺增生;前列腺结石;多处挫伤;创伤后伤口感染;头皮裂伤;胸椎骨折;胸椎楔形变;手指浅表异物;类风湿性关节炎;下肢静脉曲张;下肢静脉血栓形成	好转	田乃锋	田乃锋	周凯亮	腓骨骨折切开复位钢针内固定术;胫骨外固定装置去除术;胫骨外固定术;皮肤和皮下坏死组织切除清创术;胫骨骨折切开复位螺钉内固定术;胫骨内固定术
409	D14(脊柱)	2023-09-20	2023-10-02	3427018	袁少玉	女	64Y	腰椎骨折	高血压;糖尿病;肝炎后肝硬化;下肢动脉粥样硬化;肾错构瘤;乳房肿物;脾血管瘤;胆囊结石;肺诊断性影像异常;颈动脉硬化;下肢静脉血栓形成;下肢静脉曲张;甲状腺恶性肿瘤个人史;腰椎间盘突出;脊椎退行性病变;基底节出血	治愈	黄其杉	黄其杉	朱思品	经皮穿刺脊柱后凸成形术
410	D14(脊柱)	2023-09-27	2023-10-09	3428735	秦硬	男	44Y	腰椎骨折	胆囊息肉;腰背部挫伤;腰椎退行性病变;腰椎椎管狭窄;髋臼骨折;耻骨骨折;腰椎间盘突出;下肢静脉血栓形成	治愈	黄其杉	林仲可	朱思品	腰椎骨折切开复位内固定术
411	D14(脊柱)	2023-10-05	2023-10-10	3429565	吴莲香	女	65Y	胸椎骨折	腰椎间盘突出;脊椎退行性病变;骨质疏松;脂肪肝;下肢静脉血栓形成	治愈	田乃锋	倪文飞	周凯亮	胸椎骨折球囊扩张成形术
412	D14(脊柱)	2023-10-05	2023-10-10	3429574	胡宝凤	女	75Y	腰椎骨折	腰椎间盘突出;脊椎退行性病变;下肢静脉血栓形成;肝内胆管结石;脂肪肝;后天性肾囊肿	治愈	倪文飞	田乃锋	周凯亮	腰椎骨折球囊扩张成形术
413	D14(脊柱)	2023-10-10	2023-10-14	3431238	卢秀琴	女	64Y	胸椎骨折	腰椎间盘突出;糖尿病;骶骨骨折;腰椎退行性病变;下肢静脉血栓形成;椎管内蛛网膜囊肿;肾结石;脂肪肝	治愈	黄其杉	林仲可	朱思品	胸椎骨折球囊扩张成形术
414	D14(脊柱)	2023-10-25	2023-11-04	3440317	周美香	女	68Y	胸椎骨折	胸椎椎管狭窄;腰椎间盘突出;胸椎退行性病变;特发性(原发性)高血压;下肢静脉血栓形成	治愈	黄其杉	林仲可	林仲可	胸椎骨折切开复位内固定术;椎骨内固定术
415	D14(脊柱)	2023-10-18	2023-11-04	3440403	余玲娥	女	82Y	脊柱内固定装置障碍	胸椎骨折;腰椎骨折;腰骶椎间盘突出;腰骶椎间盘变性;脊椎退行性病变;骨质疏松;特发性(原发性)高血压;冠状动脉粥样硬化性心脏病;下肢静脉血栓形成;下肢动脉粥样硬化;肝囊肿;后天性肾囊肿	治愈	田乃锋	田乃锋	周凯亮	椎管减压术;经皮椎骨成形术;椎骨内固定术
416	D14(脊柱)	2023-10-31	2023-11-13	3444545	彭娟	女	82Y	肿瘤性病理性骨折	腰椎间盘突出;躯干部血管瘤;脊椎退行性病变;肺恶性肿瘤;纵隔淋巴结继发恶性肿瘤;脊柱继发恶性肿瘤;甲状腺结节;高血压性心脏病;主动脉瓣关闭不全;退行性主动脉瓣疾患;肺动脉高压中度;胸腔积液;心功能不全;脑缺血灶;脱髓鞘性脑病;老年性脑萎缩;下肢静脉血栓形成;下肢静脉曲张	好转	田乃锋	倪文飞	周凯亮	胸椎骨折球囊扩张成形术
417	D14(脊柱)	2023-10-19	2023-11-18	3446622	赵建新	男	50Y	颈部脊髓损伤	颈椎多处骨折;颈椎脱位;创伤性截瘫;颈椎前移;颈椎椎管狭窄;颈椎间盘突出;脊椎退行性病变;躯干部血管瘤;创伤性湿肺;后天性肾囊肿;肝囊肿;下肢静脉血栓形成;肺大疱;胸腔积液;肾钙化	好转	徐晖	许聪	许聪	前入路颈椎融合术;前入路颈椎间盘切除术;2-3个椎骨融合或再融合;金属脊椎融合物置入术;胸椎融合术，后入路;胸椎椎板切除减压术
418	D14(脊柱)	2023-11-15	2023-11-21	3448028	姜翠凤	女	78Y	胸椎压缩性骨折	胸椎椎管狭窄;骨质疏松;躯干部血管瘤;脊椎退行性病变;腰椎间盘突出;人工膝关节;单关节炎;特发性(原发性)高血压;下肢静脉血栓形成;后天性肾囊肿	治愈	田乃锋	周凯亮	周凯亮	胸椎骨折球囊扩张成形术
419	D14(脊柱)	2023-11-27	2023-12-03	3453190	朱陈花	女	83Y	胸椎压缩性骨折	陈旧性胸椎骨折;骨质疏松;带状疱疹性神经痛;胸椎退行性病变;腰椎退行性病变;高血压;糖尿病;下肢静脉血栓形成;肺部感染;胸腔积液	治愈	徐晖	徐晖	朱思品	胸椎骨折球囊扩张成形术
420	D14(脊柱)	2023-12-02	2023-12-12	3457159	谢秀凤	女	78Y	骨质疏松伴有病理性骨折	陈旧性胸椎骨折;陈旧性腰椎骨折;脊柱后凸;脊柱侧弯;下肢静脉血栓形成;胸椎退行性病变;腰椎退行性病变;心功能不全;肝硬化;心室过早除极;屈梅尔脊柱炎	好转	倪文飞	王胜	许聪	腰椎骨折球囊扩张成形术
421	D14(脊柱)	2023-12-11	2023-12-16	3458740	金碎香	女	76Y	胸椎骨折	肩胛骨骨折;骨质疏松;特发性(原发性)高血压;脑梗死后遗症;腰椎退行性病变;胸椎退行性病变;下肢静脉血栓形成;后天性肾囊肿	治愈	徐晖	徐晖	朱思品	胸椎骨折球囊扩张成形术
422	D14(脊柱)	2023-12-13	2023-12-18	3459732	叶阿花	女	79Y	骨质疏松伴有病理性骨折	胸椎退行性病变;腰椎退行性病变;乳房恶性肿瘤个人史;手术后状态，其他特指的;后天性肾囊肿;下肢静脉血栓形成;心功能不全	好转	倪文飞	王胜	许聪	胸椎骨折球囊扩张成形术
423	D14(脊柱)	2023-12-18	2023-12-30	3464864	苏红玉	女	85Y	腰椎骨折	陈旧性胸椎骨折;腰椎前移;脊椎退行性病变;骨质疏松;硬膜外出血;腰骶椎间盘突出;腰椎椎管狭窄;腔隙性脑梗死;老年性脑萎缩;高血压;肺部感染;肝回声不均;肾脂肪瘤;腹部区域诊断性影像检查的异常所见(包括腹膜后腔)，其他的;肾超声检查异常;下肢静脉血栓形成	治愈	倪文飞	林仲可	万峻莱	腰椎骨折球囊扩张成形术
424	D15颈椎外科、腰椎外科	2022-12-24	2023-01-03	3314809	卓金英	女	70Y	颈部脊髓损伤	脊髓受压;颈椎间盘突出;下肢静脉血栓形成;肋骨骨折;脂肪肝;肾结石;脊髓变性	治愈	王向阳	田乃锋	田乃锋	椎管成形术;颈椎后路单开门椎管减压术
425	D15颈椎外科、腰椎外科	2022-12-29	2023-01-05	3315581	杨彩凤	女	81Y	胸椎骨折	骨质疏松;下肢静脉血栓形成;帕金森病;高血压病;肝囊肿;肺部感染	治愈	林焱	陈教想	陈教想	胸椎骨折球囊扩张成形术
426	D15颈椎外科、腰椎外科	2022-12-28	2023-01-07	3316152	金苏花	女	68Y	腰椎骨折	下肢静脉血栓形成;耻骨骨折;骶骨骨折;肺挫伤;骨质疏松;脂肪肝	治愈	王向阳	田乃锋	田乃锋	腰椎骨折球囊扩张成形术
427	D15颈椎外科、腰椎外科	2023-01-17	2023-01-24	3323317	朱彩奶	女	82Y	骨质疏松伴病理性骨折	高血糖素分泌增多;胸腔积液;后天性肾囊肿;下肢动脉粥样硬化;下肢动脉硬化闭塞症;下肢静脉血栓形成;肾钙化;腰椎骨折;腰椎间盘突出;躯干部血管瘤;高血压病	好转	王向阳	王向阳	田乃锋	腰椎骨折球囊扩张成形术
428	D15颈椎外科、腰椎外科	2023-01-26	2023-01-31	3326515	伍素文	女	82Y	骨质疏松伴病理性骨折	甲状腺疾患;下肢静脉血栓形成;肺结节;后天性肾囊肿;肝囊肿;高血压病;腰椎骨折;躯干部血管瘤	好转	林焱	林焱	陈教想	腰椎骨折球囊扩张成形术
429	D15颈椎外科、腰椎外科	2023-01-24	2023-02-01	3327079	胡玉英	女	86Y	腰椎骨折	脂肪肝;胆汁淤积症;创伤性胸腔积液;间质性肺病;卵巢、输卵管和阔韧带非炎性疾患;骨质疏松;高血压病;下肢静脉血栓形成;糖尿病	治愈	林焱	林焱	陈教想	腰椎骨折球囊扩张成形术
430	D15颈椎外科、腰椎外科	2023-01-29	2023-02-01	3327146	胡文为	男	85Y	特指颈椎骨折	前列腺结石;颈椎关节强硬;颈椎间盘突出;头皮血肿;老年性脑萎缩;肺结节;肝囊肿;前列腺增生;下肢静脉血栓形成	好转	王向阳	田乃锋	田乃锋
431	D15颈椎外科、腰椎外科	2023-01-28	2023-02-03	3328471	厉建武	男	47Y	锁骨骨折	半月板损伤;膝关节十字韧带扭伤;胫骨骨折;胆囊结石;脂肪肝;胆囊息肉;肾超声检查异常;膝关节副韧带扭伤;腓骨骨折;股骨骨折;下肢静脉血栓形成	好转	孔建中	陈墨川	方文来	锁骨植骨术;锁骨骨折切开复位钢针内固定术
432	D15颈椎外科、腰椎外科	2023-02-07	2023-02-14	3330712	胡玉兰	女	73Y	胸椎骨折	骨质疏松;焦虑[回避]型人格障碍;创伤性胸腔积液;下腔静脉血栓形成;肺挫伤	治愈	林焱	林焱	陈教想	胸椎骨折球囊扩张成形术
433	D15颈椎外科、腰椎外科	2023-02-15	2023-02-20	3333113	陈丽丽	女	70Y	胸椎骨折	下肢静脉血栓形成;肾钙化;后天性肾囊肿;肾超声检查异常;骨质疏松;肺结节;创伤性胸腔积液;甲状腺肿;肾上腺钙化	好转	毛方敏	林仲可	林仲可	胸椎骨折球囊扩张成形术
434	D15颈椎外科、腰椎外科	2023-02-14	2023-02-26	3335517	李松梅	女	86Y	腰椎骨折	下肢静脉血栓形成;后天性肾囊肿;多发性肝囊肿;胆囊结石;创伤性胸腔积液;肺钙化;脑缺血灶;脑梗死个人史;脱髓鞘性白质脑病;老年性脑萎缩;乳突炎;骨质疏松;肾结石;主动脉粥样硬化	治愈	王向阳	田乃锋	田乃锋	腰椎骨折球囊扩张成形术
435	D15颈椎外科、腰椎外科	2023-02-26	2023-03-01	3336767	项苏红	女	56Y	胸椎骨折	后天性肾囊肿;腰椎间盘突出;骨质疏松;胆囊息肉;脂肪肝;下肢静脉血栓形成	治愈	王向阳	盛孙仁	盛孙仁	胸椎骨折球囊扩张成形术
436	D15颈椎外科、腰椎外科	2023-03-08	2023-03-12	3341218	梁碎娟	女	75Y	骨质疏松伴病理性骨折	腰椎骨折L2;下肢动脉粥样硬化;肺不张;间质性肺病;胆囊结石;特指主动脉瓣疾患;陈旧性胸椎骨折;肺部感染;下肢静脉血栓形成;心功能不全;肺结节	好转	武垚森	王胜	武垚森	腰椎骨折球囊扩张成形术
437	D15颈椎外科、腰椎外科	2023-03-07	2023-03-14	3341983	余荣西	男	54Y	胸椎骨折	肋骨骨折;下肢静脉血栓形成	治愈	王向阳	盛孙仁	盛孙仁	胸椎骨折切开复位内固定术
438	D15颈椎外科、腰椎外科	2023-03-12	2023-03-15	3342479	林天真	女	79Y	胸椎骨折T11/T12	肾结石;颈椎退行性病变;腔隙性脑梗死;特指主动脉瓣疾患;高血压病;2型糖尿病;骨质疏松;下肢静脉血栓形成;心功能不全;甲状腺结节;肺结节	好转	王向阳	盛孙仁	盛孙仁
439	D15颈椎外科、腰椎外科	2023-04-04	2023-04-11	3353163	连春英	女	72Y	骨质疏松伴病理性骨折	肾结石;胸椎压缩性骨折;高血压病;下肢静脉血栓形成	治愈	林焱	田乃锋	田乃锋	胸椎骨折球囊扩张成形术
440	D15颈椎外科、腰椎外科	2023-04-13	2023-04-19	3356332	徐启豆	男	77Y	腰椎骨折L2	膀胱占位性病变;下肢静脉血栓形成;肝囊肿;前列腺结石;高血压病;腰骶椎间盘突出;帕金森病;肾结石	治愈	林焱	田乃锋	田乃锋	腰椎骨折球囊扩张成形术
441	D15颈椎外科、腰椎外科	2023-04-15	2023-04-20	3356887	陈洪钗	女	59Y	腰椎骨折	肝血管瘤;椎间盘膨隆;腰椎间盘突出;下肢静脉血栓形成	治愈	林焱	田乃锋	田乃锋	腰椎骨折球囊扩张成形术
442	D15颈椎外科、腰椎外科	2023-04-20	2023-04-25	3358839	李希平	男	71Y	骨质疏松伴病理性骨折	后天性肾囊肿;肾结石;腰椎骨折L4;静脉疾患;前列腺结石;前列腺增生;下肢静脉血栓形成;心功能不全;躯干部血管瘤;特指手术后状态	好转	林焱	田乃锋	田乃锋	腰椎骨折球囊扩张成形术
443	D15颈椎外科、腰椎外科	2023-04-21	2023-04-25	3358843	林忠彩	女	67Y	胸椎压缩性骨折	高血压病;胆囊息肉;脂肪肝;下肢静脉血栓形成	治愈	林焱	田乃锋	田乃锋	胸椎骨折球囊扩张成形术
444	D15颈椎外科、腰椎外科	2023-04-28	2023-05-05	3362535	陈龙叶	女	82Y	腰椎压缩性骨折	肺结节;下肢动脉硬化闭塞症;腰椎前移;下肢动脉粥样硬化;下肢静脉血栓形成;腰骶椎间盘突出;高血压病;食管裂孔疝;肝内胆管结石	治愈	林焱	田乃锋	田乃锋	腰椎骨折球囊扩张成形术
445	D15颈椎外科、腰椎外科	2023-04-30	2023-05-07	3363445	杨彩云	女	60Y	骨质疏松伴病理性骨折	后天性肾囊肿;肾结石;腰椎骨折;下肢静脉血栓形成;心功能不全	好转	王向阳	盛孙仁	盛孙仁	腰椎骨折球囊扩张成形术
446	D15颈椎外科、腰椎外科	2023-04-04	2023-05-10	3364769	王济林	男	60Y	颈部脊髓损伤	胸椎压缩性骨折;截瘫;肋骨骨折;下肢静脉血栓形成;肺挫伤	治愈	王向阳	盛孙仁	盛孙仁	前入路颈椎间盘切除术;胸椎骨折球囊扩张成形术;颈椎植骨术;前入路颈椎融合术
447	D15颈椎外科、腰椎外科	2023-05-11	2023-05-15	3366654	胡德安	女	80Y	胸椎压缩性骨折	下肢静脉血栓形成;特指手术后状态;后天性肾囊肿;多发性脑梗死;阿尔茨海默病（老年型）;原发性甲状腺机能亢进症;骨质疏松	治愈	王向阳	盛孙仁	盛孙仁	胸椎骨折球囊扩张成形术
448	D15颈椎外科、腰椎外科	2023-05-10	2023-05-15	3366665	周冬菊	女	73Y	骨质疏松伴病理性骨折	腰椎骨折L4;胆囊结石;高血压病;陈旧性肋骨骨折;胸腔积液;下肢静脉血栓形成;血管炎	好转	毛方敏	毛方敏	陈教想	腰椎骨折球囊扩张成形术
449	D15颈椎外科、腰椎外科	2023-05-16	2023-05-27	3371499	叶日飞	男	88Y	颈部脊髓损伤	手术后状态，其他特指的;高血压;主动脉瓣疾患;颈椎骨折;下肢静脉血栓形成	好转	王向阳	盛孙仁	盛孙仁	颈椎后路单开门椎管减压术;颈椎骨折切开复位内固定术
450	D15颈椎外科、腰椎外科	2023-05-22	2023-06-04	3374810	金玉钗	女	74Y	胸椎骨折	肾炎;高血压;糖尿病不伴有并发症;骨质疏松，其他的;腔隙性脑梗死;肺肿物;下肢静脉血栓形成;老年性痴呆;后天性肾囊肿	治愈	毛方敏	陈教想	718177	椎弓根钉内固定术;胸椎骨折切开复位内固定术
451	D15颈椎外科、腰椎外科	2023-05-29	2023-06-04	3374821	潘玉楹	男	86Y	腰椎骨折L1	骨质疏松，其他的;腰椎退行性病变;肝钙化灶;下肢静脉血栓形成;老年性痴呆;后天性肾囊肿;阻塞性肺炎	治愈	毛方敏	陈教想	718177	腰椎骨折球囊扩张成形术
452	D15颈椎外科、腰椎外科	2023-05-29	2023-06-05	3375521	林海同	男	66Y	胸椎骨折	腰骶椎间盘突出;老年性脑萎缩;胸椎脱位;脊髓损伤;腰椎脱位;肋骨骨折;腰椎骨折;坠积性肺炎;下肢静脉血栓形成;截瘫;肾结石;创伤性胸腔积液	治愈	林焱	盛孙仁	盛孙仁	腰椎后柱融合术，后入路;椎弓根钉内固定术;胸椎椎板切除减压术;腰椎椎板切除减压术;胸椎植骨术
453	D15颈椎外科、腰椎外科	2023-06-17	2023-06-25	3383527	谢选德	男	63Y	颈椎骨折	间质性肺病，其他特指的;颈椎退行性病变;头部外伤;前列腺结石;下肢静脉血栓形成	治愈	毛方敏	毛方敏	朱思品	颈椎骨折切开复位内固定术;颈椎病损切除术;颈椎植骨术;前入路颈椎融合术
454	D15颈椎外科、腰椎外科	2023-06-17	2023-06-26	3383976	林柳凤	女	56Y	颈部脊髓损伤	颈椎间盘突出;下肢静脉血栓形成;桡骨远端骨折;创伤性胸腔积液	好转	林焱	盛孙仁	盛孙仁	颈椎植骨术;前入路颈椎融合术;前入路颈椎间盘切除术
455	D15颈椎外科、腰椎外科	2023-07-05	2023-07-18	3393955	郑黄英	女	57Y	腰椎骨折	骶骨骨折;尾骨骨折;脂肪肝;胸椎骨折;下肢静脉血栓形成;坐骨骨折	好转	毛方敏	窦海成	朱思品	胸椎骨折球囊扩张成形术;椎弓根钉内固定术;腰椎骨折切开复位内固定术
456	D15颈椎外科、腰椎外科	2023-07-15	2023-07-22	3395530	吴玉仙	女	63Y	腰椎骨折	骨质疏松，其他的;膝关节副韧带损伤;下肢静脉血栓形成;特发性（原发性）高血压;2型糖尿病;幽门螺旋杆菌感染	好转	毛方敏	窦海成	朱思品	腰椎骨折球囊扩张成形术
457	D15颈椎外科、腰椎外科	2023-06-30	2023-07-25	3397088	叶晓飞	女	49Y	胸椎骨折	下肢静脉血栓形成;不完全性瘫痪;肾结石;手术后状态，其他特指的;肺部结节;胸腔积液;脂肪肝	治愈	王向阳	王向阳	陈教想	胸椎骨折切开复位内固定术;胸椎椎板切除减压术;胸椎植骨术;股静脉穿刺术;下腔静脉滤器置入术;胸椎融合术，后入路
458	D15颈椎外科、腰椎外科	2023-07-17	2023-07-26	3397737	陈加道	男	61Y	腰椎骨折	脂肪肝;慢性胃炎;腰椎间盘突出;高血压;下肢静脉血栓形成;糖尿病;不完全性瘫痪	治愈	王向阳	王向阳	陈教想	椎弓根钉内固定术;腰椎植骨术;腰椎椎板切除减压术;腰椎后柱融合术，后入路
459	D15颈椎外科、腰椎外科	2023-07-26	2023-08-03	3401269	黄岳仁	男	78Y	骨质疏松伴有病理性骨折，其他的	下肢静脉血栓形成;完全性左束支传导阻滞;主动脉钙化;腰骶椎间盘突出;腰椎退行性病变;腰椎压缩性骨折;前列腺结石;冠状动脉粥样硬化;2型糖尿病	好转	林焱	盛孙仁	盛孙仁	腰椎骨折球囊扩张成形术
460	D15颈椎外科、腰椎外科	2023-08-04	2023-08-08	3403357	陈春娥	女	80Y	骨质疏松伴有病理性骨折，其他的	胸椎骨折;腰椎退行性病变;下肢静脉血栓形成;脂肪肝;肝囊肿;胆囊结石;肺间质纤维化;心功能不全;高血压;胸椎退行性病变	治愈	林焱	盛孙仁	盛孙仁	胸椎骨折球囊扩张成形术
461	D15颈椎外科、腰椎外科	2023-07-29	2023-08-20	3408678	陈三翠	女	69Y	颈椎多发性骨折	下肢静脉血栓形成;肾超声检查异常;肾结石;寰枢椎脱位;胸椎骨折;手术后状态，其他特指的;颈椎间盘突出;骨质疏松，其他的;心肌肥厚	治愈	王向阳	王向阳	陈教想	颈椎骨折切开复位内固定术;后入路颈椎融合术;颈椎植骨术;颅骨牵引术
462	D15颈椎外科、腰椎外科	2023-09-03	2023-09-08	3416878	黄美玲	女	72Y	腰椎压缩性骨折	腰椎间盘突出;腰椎退行性病变;骨质疏松，其他的;下肢静脉血栓形成;肺的其他疾患;主动脉钙化;心功能不全	治愈	林焱	窦海成	窦海成	腰椎骨折球囊扩张成形术
463	D15颈椎外科、腰椎外科	2023-09-06	2023-09-14	3419438	周冬美	女	74Y	骨质疏松伴有病理性骨折，其他的	腰椎骨折;高血压;帕金森病;下肢静脉血栓形成	好转	毛方敏	盛孙仁	盛孙仁	腰椎骨折球囊扩张成形术
464	D15颈椎外科、腰椎外科	2023-09-05	2023-09-16	3419946	李爱翠	女	89Y	腰椎骨折	马尾损伤;骨质疏松，其他的;腰骶椎间盘突出;腰椎退行性病变;腰椎椎管狭窄;肺的其他疾患;主动脉钙化;高血压;心功能不全;下肢静脉血栓形成;创伤性胸腔积液;胸椎退行性病变	治愈	王向阳	武垚森	武垚森	腰椎骨折切开复位内固定术
465	D15颈椎外科、腰椎外科	2023-09-16	2023-09-20	3421839	李冬兰	女	69Y	胸椎压缩性骨折	下肢静脉血栓形成;心功能不全;陈旧性胸椎骨折;静脉疾患;腰椎间盘突出;陈旧性腰椎骨折;腰椎退行性病变;糖尿病;肺炎;脂肪肝;胆囊结石	好转	王向阳	武垚森	武垚森	胸椎骨折球囊扩张成形术
466	D15颈椎外科、腰椎外科	2023-09-17	2023-09-23	3422883	姜碎菊	女	84Y	腰椎骨折	腰椎间盘突出;骨质疏松，其他的;腰椎退行性病变;脑萎缩;肺部感染;肺间质纤维化;胸腔积液;肾结石;脂肪肝;下肢动脉血栓形成;特发性(原发性)高血压	治愈	林焱	窦海成	219091	腰椎骨折球囊扩张成形术
467	D15颈椎外科、腰椎外科	2023-09-20	2023-09-27	3424753	周兰香	女	68Y	腰椎压缩性骨折	骨质疏松，其他的;腰椎退行性病变;肺炎性肿块;下肢静脉血栓形成;陈旧性腰椎骨折;胸椎退行性病变	治愈	林焱	窦海成	219091	腰椎骨折球囊扩张成形术
468	D15颈椎外科、腰椎外科	2023-09-13	2023-09-28	3425268	张王波	男	65Y	胸椎骨折	腰椎间盘突出;颈椎间盘突出;腰椎退行性病变;前列腺结石;下肢静脉血栓形成;心功能不全;颈椎退行性病变;胸椎退行性病变	治愈	王向阳	武垚森	武垚森	胸椎骨折切开复位内固定术
469	D15颈椎外科、腰椎外科	2023-09-10	2023-09-30	3426276	王爱玉	女	68Y	腰椎骨折	脑梗死;肝回声不均;心功能不全;下肢静脉血栓形成;创伤性髂腰肌血肿;开放性腰大肌断裂;脊髓损伤;耻骨骨折;腰椎椎管狭窄;头皮血肿;肋骨多处骨折;胫腓骨干骨折	治愈	毛方敏	盛孙仁	盛孙仁	腰椎后柱融合术，后入路;椎弓根钉内固定术;腰椎植骨术;腰椎椎板切除减压术;腰椎骨折切开复位内固定术;胸椎骨折切开复位内固定术
470	D15颈椎外科、腰椎外科	2023-09-29	2023-10-04	3427627	陈满芳	女	56Y	腰椎骨折L3	腰椎间盘突出;腰椎退行性病变;桡骨远端骨折;肾结石;高血压;腔隙性脑梗死;下肢静脉血栓形成;脂肪肝	治愈	王向阳	武垚森	武垚森	腰椎骨折球囊扩张成形术
471	D15颈椎外科、腰椎外科	2023-09-27	2023-10-05	3427907	郑光宝	女	57Y	腰椎压缩性骨折	肝囊肿;下肢静脉血栓形成;帕金森病	治愈	林焱	窦海成	陈泽新	腰椎骨折切开复位内固定术
472	D15颈椎外科、腰椎外科	2023-10-08	2023-10-14	3431114	戚松英	女	71Y	骨质疏松伴有病理性骨折，其他的	腰椎骨折L1;髋关节置换术后;心功能不全;肝囊肿;下肢静脉血栓形成	好转	王向阳	武垚森	武垚森	腰椎骨折球囊扩张成形术
473	D15颈椎外科、腰椎外科	2023-10-08	2023-10-14	3431194	麻秀兰	女	79Y	腰椎压缩性骨折	下肢静脉血栓形成;甲状腺术后;胆囊切除术后状态;主动脉瓣疾患，其他的;骨质疏松;特发性(原发性)高血压;心功能不全;脂肪肝;肝囊肿;后天性肾囊肿	治愈	毛方敏	盛孙仁	盛孙仁	腰椎骨折球囊扩张成形术
474	D15颈椎外科、腰椎外科	2023-10-08	2023-10-14	3431203	杨赛花	女	76Y	腰椎骨折	胆囊息肉;后天性肾囊肿;肾上腺囊肿;下肢静脉血栓形成;骨质疏松，其他的;特发性(原发性)高血压;糖尿病;心功能不全;肝囊肿	治愈	王向阳	武垚森	武垚森	腰椎骨折球囊扩张成形术
475	D15颈椎外科、腰椎外科	2023-10-28	2023-11-02	3439733	黄秀连	女	64Y	胸椎骨折	高血压;2型糖尿病;下肢静脉血栓形成;心功能不全	治愈	毛方敏	盛孙仁	盛孙仁	胸椎骨折球囊扩张成形术
476	D15颈椎外科、腰椎外科	2023-11-04	2023-11-12	3444010	吴彩仙	女	63Y	腰椎骨折L4	头皮血肿;颞骨骨折;肋骨多处骨折;创伤性肺炎;创伤性胸腔积液;急性失血性贫血;下肢静脉血栓形成;肺诊断性影像异常;胸腰椎椎管狭窄;胸椎退行性病变;胆囊结石;乙型病毒性肝炎;胸椎骨折;腰椎退行性病变	好转	林焱	窦海成	陈泽新
477	D15颈椎外科、腰椎外科	2023-11-04	2023-11-13	3444533	蔡文秋	女	69Y	颈椎骨折	肋骨多处骨折;肩胛骨骨折;多发性腰椎骨折;特发性(原发性)高血压;肝血管瘤;肝囊肿;肾结石;心功能不全;下肢静脉血栓形成;二尖瓣反流	好转	毛方敏	盛孙仁	盛孙仁
478	D15颈椎外科、腰椎外科	2023-10-27	2023-11-14	3444973	洪延松	男	52Y	腰椎骨折	髂骨骨折;髋臼骨折;耻骨骨折;股骨粗隆下骨折;跟骨骨折;马尾损伤;创伤性湿肺;创伤性胸腔积液;肺部感染;肺动脉栓塞;腹腔积液;胆囊结石;肝囊肿;下肢静脉血栓形成;低蛋白血症;急性失血性贫血	治愈	武垚森	吴爱悯	金海明	股骨骨折切开复位内固定术;腰椎骨折切开复位内固定术;下腔静脉滤器取出术;下肢静脉造影
479	D15颈椎外科、腰椎外科	2023-11-11	2023-11-16	3445843	连何香	女	86Y	胸椎骨折	骨质疏松;腰椎间盘突出;脊椎退行性病变;脊柱侧弯;脂肪肝;肝囊肿;肝胆管扩张;胰管扩张;肝胆管结石;胆总管结石;胰腺假囊肿;后天性肾囊肿;肺炎;下肢静脉血栓形成	治愈	林焱	窦海成	陈泽新	胸椎骨折球囊扩张成形术
480	D15颈椎外科、腰椎外科	2023-11-05	2023-11-18	3446511	蒋月娥	女	67Y	腰椎椎管狭窄	腰椎间盘突出;腰椎前移;陈旧性胸椎骨折;颈椎病;下肢静脉血栓形成;胸腔积液;高血压;糖尿病不伴有并发症;颈椎退行性病变;胸椎退行性病变	治愈	林焱	窦海成	陈泽新	腰椎椎板切除减压术;腰椎植骨术;腰椎后柱融合术，后入路;椎弓根钉内固定术
481	D15颈椎外科、腰椎外科	2023-11-28	2023-12-05	3454159	吴显花	女	85Y	腰椎骨折L1	骨质疏松;胸椎退行性病变;脊柱侧弯;脂肪肝;后天性肾囊肿;肾结石;下肢静脉血栓形成;腰椎退行性病变	治愈	王向阳	窦海成	陈泽新	腰椎骨折球囊扩张成形术
482	D15颈椎外科、腰椎外科	2023-11-27	2023-12-09	3455640	姚员宝	男	48Y	腰椎骨折	截瘫;特发性(原发性)高血压;腰椎间盘突出;脂肪肝;肾结石;前列腺结石;下肢静脉血栓形成;腔隙性脑梗死	治愈	毛方敏	吴爱悯	吴爱悯	腰椎骨折切开复位内固定术
483	D15颈椎外科、腰椎外科	2023-12-25	2023-12-31	3465312	吴杨娒	女	82Y	骨质疏松伴有病理性骨折，其他的	胸椎骨折;特发性(原发性)高血压;下肢深静脉血栓形成;肺的其他疾患;脂肪肝;后天性肾囊肿;可疑疾病和情况的观察，其他的	好转	毛方敏	吴爱悯	吴爱悯
484	F02急诊创伤	2023-01-26	2023-02-13	3330499	蒋必钦	男	64Y	创伤性脾破裂	腹腔积血;肾挫伤;创伤性肾血肿;多发性肋骨骨折;肺挫伤;创伤性皮下气肿;肩胛骨骨折;面部裂伤;多处挫伤;下肢静脉血栓形成;肺结节	好转	李永领	李永领	李永领	腹腔镜下脾切除术
485	F02急诊创伤	2023-03-11	2023-03-29	3348327	徐珠翠	女	78Y	肺挫伤	创伤性胸腔积液;多发性肋骨骨折;下肢动脉粥样硬化;冠状动脉支架植入后状态;高血压病;头部外伤;多处挫伤;下肢静脉血栓形成;心功能不全;桡骨良性肿瘤;后天性肾囊肿	好转	李永领	李永领	李永领
486	F02急诊创伤	2023-03-05	2023-04-02	3349713	黄洁	女	55Y	手术后切口愈合不良	下肢静脉血栓形成;亚临床甲状腺功能减退症;运动障碍;腰骶神经根损伤;多发性肋骨骨折;关节僵硬;特指手术后状态;乙型肝炎小三阳	好转	林露阳	林露阳	项洪武	皮肤和皮下坏死组织切除清创术
487	F02急诊创伤	2023-04-02	2023-04-14	3354258	全仙云	男	86Y	多发性胸椎骨折	前列腺钙化灶;下肢动脉粥样硬化;椎间盘突出;脊椎退行性病变;胆囊结石;高血压病;前列腺增生;十二指肠憩室;胸腔积液;下肢静脉血栓形成;糖尿病	治愈	吴伟军	朱烈烈	朱烈烈	胸椎骨折球囊扩张成形术
488	F02急诊创伤	2023-04-27	2023-05-09	3364380	金雪妹	女	86Y	尺骨茎突骨折伴桡骨远端骨折	后天性肾囊肿;面部软组织挫伤;下肢动脉粥样硬化;多发性脑梗死;胆囊结石;高血压病;脂肪肝;胸腔积液;下肢静脉血栓形成;糖尿病;脑膜瘤	好转	林露阳	林露阳	项洪武
489	F02急诊创伤	2023-05-07	2023-05-13	3366042	贾春弟	女	81Y	桡骨下端骨折	肱骨上端骨折;腔隙性脑梗死;高血压病;老年性脑萎缩;耻骨骨折;下肢静脉血栓形成;肺结节	未愈	林露阳	项洪武	项洪武
490	F02急诊创伤	2023-05-15	2023-05-30	3373082	袁兰英	女	65Y	胸椎多处骨折	腰椎间盘突出;轻度贫血;肺挫伤;下肢静脉血栓形成;高血压;后天性肾囊肿;孤立性肺结节	好转	李永领	李永领	李永领
491	F02急诊创伤	2023-06-03	2023-06-25	3383672	杨关金	男	47Y	创伤性蛛网膜下腔出血	桡骨远端骨折;创伤性胸腔积液;四根以上肋骨骨折不伴第一肋骨骨折;肺挫伤;脑挫伤;肩胛骨骨折;眶骨骨折;失语;下肢静脉血栓形成;创伤性硬膜下出血;创伤性硬膜外出血;颧弓骨折;肝功能检查的异常结果;第一掌骨骨折	治愈	李永领	李永领	李永领
492	F02急诊创伤	2023-06-15	2023-07-06	3388569	蔡爱娥	女	67Y	肩胛骨骨折	创伤性蛛网膜下腔出血;创伤性鼻窦积血;额骨骨折;创伤性硬膜下出血;肋骨多处骨折;肺挫伤;创伤性胸腔积液;锁骨骨折;眶顶骨折;腰部挫伤;头皮血肿;下肢静脉肌间血栓形成;高血压;2型糖尿病;脑挫伤	好转	林露阳	项洪武	项洪武	肩胛骨骨折切开复位钢板内固定术
493	F02急诊创伤	2023-06-25	2023-07-07	3388639	陆曼华	女	90Y	股骨粗隆间骨折	下肢静脉肌间血栓形成;老年性痴呆;受压区压疮;下肢静脉血栓形成;轻度贫血	好转	林露阳	林露阳	项洪武	股骨骨折切开复位钢板内固定术;股骨人工骨植骨术;骨空隙骨水泥填充术;股骨颈/股骨转子间骨折手法整复术
494	F02急诊创伤	2023-07-07	2023-07-11	3390798	陆曼华	女	90Y	受压区压疮	轻度贫血;股骨粗隆间骨折;阿尔茨海默病性痴呆;下肢深静脉血栓形成	好转	张文振	林露阳	孙成昊
495	F02急诊创伤	2023-07-26	2023-08-07	3403082	陈爱菊	女	61Y	创伤性硬膜下出血	创伤性硬脑膜外出血;创伤性蛛网膜下腔出血;脑挫伤;枕骨骨折;颅腔积气;高血压;肺的其他疾患;低钠血症;冠状动脉支架植入后状态;下肢动脉粥样硬化;下肢静脉血栓形成;下肢静脉曲张	好转	林露阳	林露阳	项洪武	硬脑膜下钻孔引流术
496	F02急诊创伤	2023-07-08	2023-08-09	3403964	黎永亮	男	49Y	开放性肺破裂	前列腺钙化灶;肺栓塞;下肢静脉血栓形成;肺部感染;四根以上肋骨骨折不伴第一肋骨骨折;胸骨骨折;肾上腺钙化;多处挫伤;创伤性皮下气肿	好转	林露阳	林露阳	项洪武	股静脉穿刺术;下腔静脉滤器取出术;肾静脉造影;下肢静脉滤器置入术
497	F02急诊创伤	2023-08-13	2023-08-22	3409836	吴迎春	男	70Y	创伤性脑出血	脑挫伤;创伤性硬脑膜下积液;弥漫性轴索损伤;四根以上肋骨骨折不伴第一肋骨骨折;肩胛骨骨折;多发性腰椎骨折;多处挫伤;下肢静脉血栓形成;肺大疱;孤立性肺结节;肝囊肿;后天性肾囊肿;前列腺增生;前列腺钙化灶;甲状腺结节;下肢动脉粥样硬化	好转	林露阳	林露阳	项洪武
498	F02急诊创伤	2023-08-15	2023-08-28	3412626	黄元兴	男	75Y	创伤性蛛网膜下腔出血	脑挫伤;颧骨骨折;臀部浅表损伤;髋和下肢三度烧伤;体表小于10%的烧伤;腹部肌肉损伤;多处挫伤;下肢静脉血栓形成;肾挛缩;膀胱恶性肿瘤个人史	好转	林露阳	林露阳	项洪武	髂动脉造影;髂动脉栓塞术
499	F02急诊创伤	2023-08-29	2023-09-04	3415541	黄元兴	男	75Y	髋和下肢三度烫伤	体表小于10%的烧伤;创伤性蛛网膜下腔出血;脑挫伤;颧骨骨折;臀部浅表损伤;腹部肌肉损伤;多处开放性伤口;肾挛缩;下肢静脉血栓形成;膀胱恶性肿瘤个人史;手术后状态，其他特指的	好转	张文振	张文振	孙成昊	皮肤和皮下坏死组织切除清创术;中厚皮片移植术
500	F02急诊创伤	2023-09-04	2023-09-20	3421989	黄元兴	男	75Y	髋和下肢三度烫伤	体表小于10%的烧伤;带状疱疹不伴有并发症;创伤性蛛网膜下腔出血;脑挫伤;颧骨骨折;臀部浅表损伤;腹部肌肉损伤;多处开放性伤口;肾挛缩;下肢静脉血栓形成;膀胱恶性肿瘤个人史;手术后状态，其他特指的	好转	张文振	林露阳	孙成昊
501	F02急诊创伤	2023-09-23	2023-09-26	3424457	陈阿彩	女	82Y	髋和下肢二度烧伤	下肢皮肤感染;胫骨平台骨折;下肢静脉血栓形成;高血压;糖尿病	好转	张文振	项洪武	孙成昊
502	F02急诊创伤	2023-10-09	2023-10-27	3437012	孙美香	女	85Y	创伤性硬膜下出血	创伤性蛛网膜下腔出血;创伤性脑出血;枕骨骨折;脑挫伤;头皮血肿;肋骨骨折;肺挫伤;创伤性胸腔积液;桡骨远端骨折;肺气肿;胆囊结石;下肢静脉血栓形成;多发性脑梗死	治愈	李永领	李永领	李永领
503	F02急诊创伤	2023-10-09	2023-10-29	3437941	洪兴平	男	61Y	肋骨多处骨折	前列腺其他特指的疾患;颈椎间盘突出;腰椎间盘突出;慢性胃炎;脊柱骨软骨病;创伤性胸腔积液;肾挫伤;下肢静脉血栓形成;多处开放性伤口	好转	李永领	李永领	李永领
504	F02急诊创伤	2023-11-11	2023-11-17	3446187	林翠华	女	61Y	耻骨骨折	皮肤挫伤;头皮血肿;下肢静脉血栓形成;肺诊断性影像异常;主动脉弓钙化	好转	林露阳	林露阳	项洪武
505	F02急诊创伤	2023-11-14	2023-11-29	3451649	李冬英	女	85Y	骶骨骨折	耻骨骨折;肋骨多处骨折;胸椎压缩性骨折;多发性腰椎骨折;肺挫伤;腹腔积血;多处挫伤;创伤性胸腔积液;肺部感染;下肢动脉粥样硬化;腰椎间盘突出;陈旧性肋骨骨折;老年性脑萎缩;下肢静脉血栓形成;腰椎椎管狭窄	好转	林露阳	林露阳	项洪武
506	F02急诊创伤	2023-11-27	2023-12-05	3454337	李继波	男	58Y	肋骨多处骨折	创伤性胸腔积液;肾结石伴有输尿管结石;糖尿病;肺不张;下肢静脉血栓形成;皮肤挫伤	好转	林露阳	林露阳	项洪武
507	F02急诊创伤	2023-12-18	2023-12-23	3461891	陈小钗	女	65Y	胸椎骨折T11/T12	肌肉骨骼系统其他部位诊断性影像检查的异常所见;下肢动脉粥样硬化;下肢静脉血栓形成;高血压;高脂血症	好转	吴伟军	朱烈烈	朱烈烈	经皮穿刺脊柱后凸成形术
508	F03观察病房	2023-01-12	2023-01-23	3322953	沈万英	女	104Y	股骨干骨折	肺部感染;胸腔积液;心房颤动;下肢静脉血栓形成;下肢动脉粥样硬化;胆囊结石;肾积水伴肾结石;后天性肾囊肿	好转	陈大庆	夏轶姿	周志良	股骨骨折闭合复位钢针内固定术
509	F03观察病房	2023-07-15	2023-07-31	3399886	林秀兰	女	57Y	胸椎骨折	肋骨多处骨折;胸腔积液;肺挫伤;脊髓损伤后遗症;躯干开放性伤口;特发性（原发性）高血压;多发性肝囊肿;下肢深静脉血栓形成;神经源性膀胱;神经源性肠;运动障碍	好转	吴伟军	朱烈烈	朱烈烈	椎骨成形术
510	F03观察病房	2023-07-24	2023-08-05	3401484	徐月红	女	66Y	抑郁状态	高血压;脑外伤后综合征;下肢静脉血栓形成;肾结石;动脉粥样硬化;2型糖尿病;上呼吸道感染;多发性脑梗死;腓骨骨折;桡骨远端骨折;眶骨骨折;颧弓骨折;上颌骨骨折;鼻中隔骨折;骶骨骨折;耻骨骨折;脊柱骨折;肋骨多处骨折	好转	陈大庆	夏轶姿	王婷婷4
511	F03观察病房	2023-09-12	2023-09-23	3423084	陈阿彩	女	82Y	髋和下肢二度烫伤	下肢皮肤感染;坏疽，不可归类在他处者;胫骨平台骨折;下腔静脉血栓形成;特发性(原发性)高血压;糖尿病	好转	张文振	林露阳	孙成昊	中厚皮片移植术;皮肤和皮下组织非切除性清创;皮肤焦痂切开术
512	F03观察病房	2023-09-23	2023-10-12	3430357	林天杰	男	83Y	脓毒血症	前列腺恶性肿瘤;帕金森病;陈旧性多部位骨折;胆囊结石;后天性肾囊肿;中度贫血;下肢静脉血栓形成;下肢动脉粥样硬化;肺动脉高压;冠状动脉粥样硬化性心脏病;肺部感染;电解质紊乱;低蛋白血症	好转	陈大庆	齐艳红	曾霜
513	F03观察病房	2023-11-28	2023-12-25	3462925	于学凡	女	87Y	2型糖尿病性低血糖昏迷	代谢性脑病;脑梗死;肺部感染;支气管哮喘;低钠血症;低蛋白血症;冠状动脉粥样硬化性心脏病;特发性(原发性)高血压;骨盆骨折;陈旧性肋骨骨折;2型糖尿病;手术后随诊检查;下肢动脉粥样硬化;下肢深静脉血栓形成;耻骨骨折;髂骨骨折;骶骨骨折	好转	陈大庆	夏轶姿	王婷婷4
514	F03观察病房	2023-12-16	2023-12-31	3465674	胡碎玉	女	82Y	女性盆腔脓肿	持续性血尿;泌尿道感染;冠状动脉粥样硬化性心脏病;特发性(原发性)高血压;2型糖尿病;慢性肾功能不全;下肢静脉血栓形成;下肢动脉粥样硬化;肾盂积水，其他的;后天性肾囊肿;膀胱结石;脑梗死后遗症;股骨粗隆间骨折;贫血	治愈	陈大庆	夏轶姿	吴婷婷	盆腔穿刺引流术
515	F04脑外	2022-12-20	2023-01-14	3318787	匡正生	男	57Y	前交通动脉瘤破裂伴蛛网膜下腔出血	下肢动脉粥样硬化;肺中叶综合征;下肢静脉血栓形成;眶骨骨折;脂肪肝;后天性肾囊肿	治愈	尹波	许尚虞	李丹东	脑动脉造影;颅内动脉瘤栓塞术
516	F04脑外	2023-01-27	2023-03-02	3337204	李西明	男	82Y	创伤性蛛网膜下腔出血	创伤性硬膜下出血;下肢动脉粥样硬化;颅腔积气;腰椎退行性病变;腔隙性脑梗死;下肢静脉血栓形成;枕骨骨折;肝囊肿;肺部感染;胸腔积液;脑挫伤	好转	张弩	周辉	蔡铭	脑内血肿清除术
517	F04脑外	2023-04-13	2023-04-23	3357789	朱玉兰	女	60Y	三叉神经痛	肾结石;局部肿胀、肿物和肿块;动脉粥样硬化;下肢动脉粥样硬化;特指间质性肺病伴纤维化;静脉栓塞和血栓形成;颅腔积气;高血压病;二尖瓣及主动脉瓣关闭不全;疱疹病毒性水疱皮炎;陈旧性肋骨骨折;下肢静脉曲张;后天性肾囊肿	治愈	盛汉松	林逢春	许尚虞	三叉神经微血管减压术
518	F04脑外	2023-03-25	2023-04-23	3357828	赵典凑	男	56Y	内踝骨折	肌腱和肌肉损伤;第二颈椎骨折;后天性肾囊肿;多发性肋骨骨折;慢性鼻窦炎;静脉栓塞和血栓形成;2型糖尿病;慢性乙型病毒性肝炎;髋臼骨折;脑挫伤;髂骨骨折;脂肪肝;肺部感染;胸腔积液;硬脑膜下积液	好转	张弩	周辉	218319	踝关节骨折切开复位螺钉内固定术;髂骨骨折切开复位钢板内固定术
519	F04脑外	2023-06-14	2023-06-28	3384773	徐瑞松	男	83Y	基底动脉血栓形成脑梗死	陈旧性肋骨骨折;肺部感染;脑萎缩;糖尿病;恶性肿瘤个人史;上颌窦蝶窦炎	治愈	尹波	李丹东	李丹东	单根血管操作;脑动脉造影术;经导管入脑前血管血栓去除术
520	F04脑外	2023-07-08	2023-07-27	3397820	刘文浓	男	71Y	额叶脑膜瘤	癫痫综合征;特发性（原发性）高血压;肾功能不全;高脂血症;下肢动脉粥样硬化;下肢静脉血栓形成;颈动脉硬化;陈旧性肋骨骨折;脂肪肝;后天性肾囊肿;膝关节退行性病变	治愈	张弩	周辉	杨亮	额叶病损切除术
521	F04脑外	2023-06-23	2023-08-08	3403601	周香芝	女	74Y	脑挫伤	后天性肾囊肿;颈椎退行性病变;肩胛骨骨折;耻骨骨折;肋骨多处骨折;创伤性蛛网膜下腔出血;创伤性硬脑膜外出血;创伤性硬膜下出血;颈椎间盘突出;下肢静脉血栓形成;下肢动脉粥样硬化;肾积水伴肾结石	好转	盛汉松	林逢春	许尚虞	脑清创术;脑膜切开伴硬脑膜下腔血肿清除术
522	F04脑外	2023-07-12	2023-08-10	3404288	张月娥	女	69Y	基底动脉狭窄脑梗死	肺的其他疾患;肺气肿;陈旧性肋骨骨折;大脑动脉狭窄脑梗死;多发性脑梗死;特发性(原发性)高血压;颈动脉硬化;下肢静脉血栓形成;窦性心动过缓;窦性心律失常	好转	尹波	李丹东	方均浩	经皮基底动脉球囊扩张成形术;单根血管操作;脑动脉血栓溶解剂灌注;经导管颅内血管血栓去除术
523	F04脑外	2023-07-11	2023-08-16	3407117	占秀芹	女	65Y	脑挫伤	颈胸椎管椎间盘狭窄;颈椎退行性病变;颈椎间盘突出;头皮血肿;下肢深静脉血栓形成;肋骨多处骨折;肺的其他疾患;肺部感染;肾上腺血肿;脊椎退行性病变;腰椎间盘突出;腰椎骨折	好转	王怀瓯	陈彦克	陈彦克	下肢静脉滤器置入术;下肢静脉造影
524	F04脑外	2023-07-19	2023-08-19	3408450	杨怀川	男	70Y	创伤性硬膜下出血	脂肪肝;下肢静脉血栓形成;前列腺结石;前列腺增生;创伤性蛛网膜下出血;两根肋骨骨折不伴第一肋骨骨折;头皮挫伤;脑挫伤	好转	尹波	李丹东	方均浩	脑膜切开伴硬脑膜下腔血肿清除术
525	F04脑外	2023-08-19	2023-08-23	3410054	杨怀川	男	70Y	创伤性蛛网膜下出血	头皮挫伤;两根肋骨骨折不伴第一肋骨骨折;脂肪肝;前列腺增生;上颌骨骨折;下肢静脉血栓形成;前列腺结石;创伤性硬膜下出血;脑挫伤	好转	尹波	李丹东	方均浩
526	F04脑外	2023-08-21	2023-09-05	3415633	王彩娟	女	75Y	入脑前动脉血栓形成引起的脑梗死	老年性脑萎缩;肺部感染;肝囊肿;脱髓鞘性白质脑病;肱骨干骨折	好转	尹波	李丹东	方均浩	血栓溶解药的注射或输注;脑动脉造影术
527	F04脑外	2023-08-22	2023-09-06	3416149	单炳祥	男	81Y	大脑动脉血栓形成引起的脑梗死	心房颤动;后天性肾囊肿;甲状腺功能亢进症;陈旧性肋骨骨折;双侧腹股沟疝;老年性脑萎缩;肝囊肿;心包积液;甲状腺结节;基底节出血	好转	尹波	李丹东	方均浩	经导管颅内血管血栓去除术;脑动脉造影术
528	F04脑外	2023-08-17	2023-09-20	3421727	林正珠	女	71Y	脑动脉瘤	脑积水;特发性(原发性)高血压;腔隙性脑梗死;陈旧性肋骨骨折;下肢动脉粥样硬化;脂肪肝;下肢静脉血栓形成	好转	尹波	李丹东	方均浩
529	F04脑外	2023-07-24	2023-10-23	3435163	谷常福	男	75Y	急性冠脉综合征	腔隙性脑梗死;肋骨多处骨折;下肢静脉血栓形成;肾盂积水，其他的;前列腺增生;下肢动脉粥样硬化;后天性肾囊肿;脂肪肝;高血压;2型糖尿病;痛风;膀胱结石	好转	张弩	周辉	俞丽生
530	F04脑外	2023-08-16	2023-10-29	3437834	张月娥	女	69Y	基底动脉闭塞脑梗死	颈动脉硬化;下肢静脉血栓形成;窦性心动过缓;窦性心律失常;肺气肿;肋骨多处骨折;小脑前下动脉狭窄;大脑后动脉狭窄;多发性脑梗死;高血压	好转	尹波	李丹东	219123	单根血管操作;脑动脉造影术;经皮基底动脉球囊扩张成形术;颅骨切开减压术;脑动脉血栓溶解剂灌注
531	F04脑外	2023-09-06	2023-11-06	3441159	汪加喜	男	36Y	创伤性硬脑膜外出血	创伤性硬膜下出血;脑挫伤;创伤性蛛网膜下腔出血;脑疝;颅腔积气;颞骨骨折;创伤性湿肺;液气胸;四根以上肋骨骨折不伴第一肋骨骨折;肩胛骨骨折;腰骶棘突骨折;眶骨骨折;下肢静脉血栓形成;肾结石;腹腔积液;男性盆腔炎;脾大	好转	王怀瓯	陈彦克	蔡铭	硬脑膜外血肿清除术;颅骨修补术
532	F04脑外	2023-11-03	2023-11-21	3447899	章步进	男	65Y	开放性脑挫伤	下颌骨骨折;创伤性蛛网膜下腔出血;创伤性颅内积气;肋骨多处骨折;肺挫伤;颈椎多处骨折;颈椎间盘突出;后天性肾囊肿;肝囊肿;脂肪肝;胆总管扩张;肾结石;下肢静脉血栓形成	好转	张弩	周辉	俞丽生	颅静脉窦切开修补术;脑清创术;颅骨骨折复位术;皮肤和皮下组织异物切开取出术;皮肤和皮下组织非切除性清创;皮肤缝合术
533	F04脑外	2023-10-19	2023-11-22	3448512	郑琴娒	男	68Y	多发性大脑挫裂伤	创伤性硬脑膜下出血;创伤性硬脑膜外血肿;创伤性蛛网膜下腔出血;颞骨骨折;肺部感染;2型糖尿病;下肢静脉血栓形成;下肢动脉粥样硬化;慢性乙型病毒性肝炎;膈疝;胆囊息肉;胆囊炎，其他的;肾下垂;颈椎退行性病变	好转	张弩	周辉	俞丽生	脑内血肿清除术
534	F04脑外	2023-10-30	2023-11-29	3451491	谷常福	男	75Y	急性冠脉综合征	腔隙性脑梗死;肋骨骨折;下肢静脉血栓形成;输尿管积水;前列腺增生;膀胱结石;后天性肾囊肿;脂肪肝;特发性(原发性)高血压;2型糖尿病;痛风;下肢动脉粥样硬化	好转	张弩	周辉	俞丽生
535	F04脑外	2023-11-14	2023-11-29	3451517	颜贻烈	男	78Y	大脑动脉血栓形成引起的脑梗死	丘脑出血;腔隙性脑梗死;股骨颈骨折;膝关节退行性病变;老年性脑萎缩;痛风	好转	尹波	李丹东		经导管颅内血管血栓去除术;单根血管操作;脑动脉造影术
536	F04脑外	2023-11-29	2023-12-30	3465093	王碎福	男	45Y	创伤性硬脑膜外血肿	创伤性蛛网膜下腔出血;头皮血肿;颞骨骨折;肋骨骨折;肺挫伤;脂肪肝;颈椎间盘突出;下肢静脉血栓形成;筛窦蝶窦炎;前列腺增生;主动脉弓钙化;冠状动脉粥样硬化	好转	盛汉松	林逢春	杨亮	硬脑膜外血肿清除术
537	F05脑外	2022-10-26	2023-01-09	3317021	林毅	男	58Y	创伤性蛛网膜下腔出血	脑挫伤;弥漫性轴索损伤;顶骨骨折;头皮血肿;下腔静脉血栓形成;上消化道出血;鼻腔粘连;髌骨脱位;开放性腕和手多发损伤;膝关节积液;慢性筛窦炎	好转	张弩	周辉	俞丽生
538	F05脑外	2023-02-13	2023-03-18	3343521	周方洪	男	68Y	腔隙性脑梗死	肺结节;下肢动脉粥样硬化;手术后恢复期;高血压病;2型糖尿病;慢性乙型病毒性肝炎;尾骨骨折;肺部感染;肺大泡;下肢静脉血栓形成	好转	张弩	周辉	俞丽生
539	F05脑外	2023-01-02	2023-03-27	3347437	吴根富	男	41Y	胫腓骨干骨折	下肢静脉血栓形成;头皮血肿;创伤性蛛网膜下腔出血;创伤性肝破裂;多发性骨盆骨折;创伤性硬膜下出血;胫骨上端骨折;肝囊肿	治愈	王怀瓯	陈彦克	林中啸	胫骨骨折切开复位钢板内固定术
540	F05脑外	2023-04-05	2023-05-15	3366865	杨方海	男	64Y	开放性颅内异物	胸腔积液;股骨头无菌性坏死;顶骨骨折;髋关节半脱位;创伤性蛛网膜下腔出血;头皮血肿;老年性脑萎缩;中枢神经系统脱髓鞘病;二尖瓣关闭不全;颈椎退行性病变;静脉栓塞和血栓形成;创伤性大脑水肿;肺气肿;创伤性颅内积气	好转	盛汉松	林逢春	许尚虞	颅骨切开异物取出术
541	F05脑外	2023-10-15	2023-10-22	3434622	林秀英	女	82Y	大脑中动脉瘤破裂伴蛛网膜下隙出血	颞叶出血;基底节出血;大脑后动脉综合征;脑积水;脱髓鞘病;老年性脑萎缩;下肢静脉血栓形成;胸腔积液;胆囊结石;肾结石;陈旧性肋骨骨折	治愈	盛汉松	林逢春	杨亮
542	F05脑外	2023-06-28	2023-11-01	3439161	朱进斌	男	68Y	创伤性硬膜下出血	硬脑膜下积液;脑内出血;创伤性蛛网膜下腔出血;头皮血肿;酒精性肝硬化;肝囊性病;脾大;门静脉高压;慢性阻塞性肺气肿性支气管炎伴急性加重;肺结核，经证实的;肺气肿;肺不张;胸腔积液;二尖瓣及主动脉瓣关闭不全;腹腔积液;肾上腺出血;肾结石;下肢静脉血栓形成;陈旧性肋骨骨折	好转	盛汉松	林逢春	杨亮	硬脑膜下钻孔引流术;脑膜切开伴硬脑膜下腔血肿清除术
543	F06(急ICU)	2022-05-08	2023-02-21	3334187	王凤媚	女	74Y	肺部感染	呼吸心跳骤停;慢性呼吸衰竭;胸腔积液;泌尿道感染;先天性气管食管瘘;颈椎骨折;高血压病;颈部脊髓损伤;下肢静脉血栓形成;肝功能异常	死亡	胡雪珍	潘小东	章翼
544	F06(急ICU)	2023-07-12	2023-07-15	3392428	周洪献	男	71Y	心脏停搏	颈部脊髓损伤;头部外伤;头皮擦伤;颈椎骨折;肺部感染;肋骨骨折;胸椎骨折;腰椎骨折;下肢动脉粥样硬化;静脉血栓形成	未愈	孔万权	杨婷	杨婷
545	F06(急ICU)	2023-07-07	2023-08-05	3401626	麻富英	男	74Y	髋臼骨折	肋骨多处骨折;腹腔积液;胸腔积液;声带麻痹;心功能不全;呼吸衰竭;髂骨骨折;耻骨骨折;骶骨骨折;慢性尿毒症;肺部感染;骨盆骨折;慢性肾小球肾炎;慢性肾脏病5期;高血压;后天性肾囊肿;多发性脑梗死;老年性脑萎缩;失血性休克;下肢静脉血栓形成	好转	孔万权	王征	王征	髋骨骨折切开复位钢板内固定术;髋骨植骨术;关节软骨修复术;骨盆骨折切开复位钢板内固定术;暂时性气管切开术
546	F06(急ICU)	2023-08-05	2023-08-29	3412871	麻富英	男	73Y	高血压性肾衰竭	声带麻痹;后天性肾囊肿;多发性脑梗死;老年性脑萎缩;心功能不全;肺部感染;呼吸衰竭;骨盆骨折;肩胛骨骨折;下肢静脉血栓形成;胸腔积液;髂骨骨折;耻骨骨折;失血性休克;肋骨多处骨折;腹水;慢性肾小球肾炎	好转	孔万权	王征	王征
547	F06(急ICU)	2023-11-11	2023-11-16	3445949	孔万纪	男	86Y	股骨粗隆间骨折	慢性阻塞性肺病伴有急性加重;肺部感染;下肢静脉血栓形成;胸腔积液;特发性(原发性)高血压	好转	孔万权	杨婷	甘一峰	股骨骨折闭合复位螺钉内固定术
548	F06(急ICU)	2023-11-27	2023-12-22	3461472	廖大芬	男	74Y	中毒性脑病	肺部感染;呼吸衰竭;脑梗死后遗症;高血压;2型糖尿病;下肢动脉粥样硬化;帕金森病;老年性心脏瓣膜病;陈旧性肋骨骨折;肾结石;髋关节置换术后;下肢静脉血栓形成	未愈	孔万权	孔万权	谢慧	锁骨下静脉穿刺中心静脉置管术;气管镜肺泡灌洗术
549	G03神经内科	2023-02-14	2023-02-26	3335358	郑元宝	男	81Y	多发性脑梗死	下肢静脉血栓形成;后天性趾变形;颈动脉硬化;蛛网膜囊肿;老年性脑萎缩;肺部感染;胸腔积液;多发性肋骨骨折;人工膝关节;高血压病;前列腺增生;脱髓鞘性白质脑病;锁骨下动脉粥样硬化;下肢动脉粥样硬化;肝囊肿	好转	张雄	张雄	王建勇
550	G03神经内科	2023-02-23	2023-02-28	3336176	陈友模	男	62Y	腔隙性脑梗死	老年性心脏病;眶骨骨折;颈动脉硬化;乙型病毒性肝炎;前列腺结石;慢性上颌窦炎;心脏扩大;房性早搏;心房颤动;锁骨下动脉粥样硬化;先天性静脉扩张;肝病;下肢静脉血栓形成	好转	张雄	张雄	王建勇
551	G03神经内科	2023-02-15	2023-03-12	3341213	连素芬	女	96Y	出血性脑梗死	心房颤动;下肢动脉粥样硬化;下肢动脉硬化闭塞症;肺部感染;股骨粗隆间骨折;心功能不全;颈内动脉狭窄;药物性肝损害;下肢静脉血栓形成	好转	张雄	张雄	周莉莉
552	G03神经内科	2023-03-29	2023-04-02	3349501	李仙蕊	女	80Y	不安腿综合征	下肢动脉粥样硬化;2型糖尿病;桡骨骨折;耻骨骨折;睡眠障碍;下肢静脉血栓形成	好转	胡蓓蕾	李岩	李岩
553	G03神经内科	2023-06-28	2023-07-10	3390027	朱三蕊	女	77Y	症状性癫痫[继发性癫痫]	特发性（原发性）高血压;胆总管扩张;胰管扩张;肋骨多处骨折;后天性肾囊肿;陈旧性脑梗死;下肢静脉血栓形成;肺部感染;糖尿病不伴有并发症;桡骨下端骨折;髂骨骨折;耻骨骨折;多发性腰椎骨折;硬脑膜下积液	好转	邹明	邹明	刘荣培
554	G03神经内科	2023-07-15	2023-07-26	3397529	林蔡凤	女	67Y	紧张型头痛	颈动脉硬化;锁骨下动脉粥样硬化;2型糖尿病;肾结石;低钾血症;乳突炎;鼻中隔溃疡;颞骨骨折;下肢静脉血栓形成	好转	陈松芳	陈松芳	朱娟娟
555	G03神经内科	2023-07-30	2023-07-31	3399518	金爱玲	女	64Y	视神经脊髓炎［德维克］	脂肪肝;下肢静脉血栓形成;椎间盘突出;脊柱压缩性骨折;特发性（原发性）高血压;胆囊结石	好转	何志勇	周莉莉	周莉莉
556	G03神经内科	2023-12-04	2023-12-13	3457708	章从元	男	62Y	骨质疏松伴有病理性骨折，其他的	胸椎压缩性骨折;慢性乙型病毒性肝炎;特发性(原发性)高血压;糖尿病;肝恶性肿瘤;肺气肿合并肺大泡;下肢动脉粥样硬化;下肢静脉血栓形成;前列腺增生;肝术后;前列腺结石	好转	韩钊	韩钊	朱娟娟
557	G04(神内+老年)	2023-01-06	2023-01-17	3320551	徐学闹	男	53Y	腔隙性脑梗死	高磷酸盐血症;轻度贫血;低蛋白血症;腹水;胸腔积液;下肢静脉血栓形成;颈动脉硬化;下肢动脉粥样硬化;急性上呼吸道感染;肝占位性病变;闭合性胫骨平台骨折;膝关节积液;前列腺增生;肺气肿;后天性肾囊肿;高血压病;尿毒症;2型糖尿病性肾病	好转	林燕	李勇	傅方望
558	G04(神内+老年)	2023-12-10	2023-12-14	3457990	杨菊秋	女	79Y	基底节脑梗死	2型糖尿病;窦性心律失常;下肢动脉粥样硬化;脂肪肝;骨折术后;房性期前收缩[房性早搏];室性期前收缩;阵发性房性心动过速;下肢静脉血栓形成	好转	董其谦	邬伟	邬伟
559	H07骨科综合病区	2023-01-09	2023-01-31	3326689	范茂弟	男	71Y	膝关节十字韧带扭伤	膝关节副韧带扭伤;膝关节脱位;胫腓骨闭合性骨折;老年性脑变性;下肢动脉粥样硬化;下肢深静脉血栓形成;肝回声不均;后天性肾囊肿	治愈	潘孝云	柳海晓	218020	副韧带修补术;膝关节镜下前十字韧带重建术;下腔静脉滤器置入术;股静脉穿刺术;膝关节镜下后十字韧带重建术;下腔静脉滤器取出术;膝关节镜下滑膜切除术
560	H07骨科综合病区	2023-01-25	2023-02-01	3327095	金冬凤	女	82Y	双踝骨折	糖尿病;下肢静脉血栓形成;高血压病;肺炎;胸腔积液;心包积液;胆囊结石;室性早搏;肝回声不均	好转	潘孝云	柳海晓	徐道亮
561	H07骨科综合病区	2023-04-01	2023-04-11	3353052	姚三媛	女	81Y	股骨颈骨折	高血压病;2型糖尿病;下肢静脉血栓形成;冠状动脉粥样硬化性心脏病;老年性痴呆;特指手术后状态;乳房恶性肿瘤个人史;颈动脉硬化;抑郁状态;胆囊结石	好转	冯永增	冯永增	何自力	人工股骨头置换术
562	H07骨科综合病区	2023-04-04	2023-04-16	3354953	包爱玲	女	74Y	三踝骨折	腹腔内和盆腔的肿胀、肿物和肿块;下肢静脉血栓形成;踝关节脱位;心动过速;脂肪肝	好转	冯永增	冯永增	何自力	踝关节骨折切开复位钢针内固定术
563	H07骨科综合病区	2023-05-24	2023-06-18	3380445	郑光取	男	64Y	胫腓骨下端骨折	胆囊结石;小腿撕脱伤;前列腺结石;下肢静脉血栓形成;心功能不全;手术后皮肤坏死	治愈	冯永增	冯永增	周宗伟	胫骨骨折切开复位钢针内固定术;皮肤和皮下坏死组织切除清创术;游离皮肤移植;胫骨和腓骨使用外固定装置;创面封闭式负压引流术（VSD）;皮肤和皮下组织非切除性清创;中厚皮片移植术
564	H07骨科综合病区	2023-06-21	2023-07-01	3385840	施秋霞	女	66Y	双踝骨折	下肢静脉血栓形成;肝囊肿;脂肪肝	治愈	冯永增	冯永增	何自力	同种异体骨植骨术;踝关节镜下软骨修复术;踝关节骨折切开复位钢板内固定术
565	H07骨科综合病区	2023-06-15	2023-07-02	3386276	林少英	女	62Y	股骨颈骨折	高血压;下肢静脉血栓形成;后天性肾囊肿;肝囊肿	好转	成少安	成少安	陈道森	髋轴面，陶瓷与聚乙烯;髋关节滑膜切除术;全髋关节置换
566	H07骨科综合病区	2023-06-26	2023-07-02	3386278	林荣华	男	62Y	跟骨骨折	下肢静脉血栓形成;肝回声不均;主动脉钙化;心功能不全;肝囊肿	好转	冯永增	冯永增	何自力	跟骨骨折切开复位钢板内固定术
567	H07骨科综合病区	2023-06-27	2023-07-11	3390669	董国平	男	71Y	胫骨平台伴腓骨骨折	膝关节退行性病变;创伤性胸腔积液;高血压;下肢静脉血栓形成;手术后肾缺失;肝回声不均;肾积水伴肾结石;后天性肾囊肿;前列腺增生	治愈	冯永增	冯永增	何自力	胫骨人工骨植骨术;胫骨骨折切开复位钢板内固定术;关节软骨修复术
568	H07骨科综合病区	2023-06-24	2023-07-13	3391648	周为密	男	62Y	创伤后伤口感染	骨折术后;下肢静脉血栓形成;跖骨骨折;跗骨骨折;趾骨骨折;创伤性肾血肿;前列腺增生;前列腺结石	治愈	宋永焕	李晓阳	薛继鑫	皮肤和皮下组织非切除性清创;中厚皮片移植术;创面封闭式负压引流术（VSD）
569	H07骨科综合病区	2023-07-10	2023-07-17	3393279	胡阿娇	女	69Y	三踝骨折	后天性肾囊肿;肾结石;肾盂扩张;输尿管扩张;泌尿器官诊断性影像检查的异常所见;脊柱侧弯;胆囊钙化;胫腓近端韧带扭伤;下肢静脉肌间血栓形成;脂肪肝	治愈	冯永增	冯永增	何自力	踝关节骨折切开复位钢板内固定术;踝关节镜下软骨修复术
570	H07骨科综合病区	2023-07-10	2023-07-19	3394526	叶凤钗	女	75Y	股骨颈骨折	高血压;2型糖尿病;脂肪肝;下肢静脉肌间血栓形成	治愈	冯永增	冯永增	何自力	人工股骨头置换术
571	H07骨科综合病区	2023-08-20	2023-09-05	3415674	周赛君	女	54Y	手术后皮肤坏死	骨折治疗后的随诊检查;高血压;下肢静脉血栓形成	治愈	宋永焕	李晓阳	林康	创面封闭式负压引流术（VSD);皮肤和皮下坏死组织切除清创术;中厚皮片移植术
572	H07骨科综合病区	2023-08-29	2023-09-06	3416030	朱兴娒	男	91Y	股骨粗隆间骨折	心房颤动;胆总管扩张;静脉血栓形成;手术后状态，其他特指的	好转	冯永增	冯永增	219047	股骨骨折闭合复位髓内针内固定术
573	H07骨科综合病区	2023-09-09	2023-09-11	3418085	孔春英	女	71Y	取除骨折内固定装置	2型糖尿病;特发性(原发性)高血压;下肢静脉血栓形成;下肢静脉曲张;肝囊肿;主动脉钙化	其他	王鉴顺	王鉴顺	219047	瘢痕单纯切除,Z字改形修复术;肱骨内固定装置去除术
574	H07骨科综合病区	2023-09-10	2023-09-20	3421716	李银朵	男	65Y	股骨粗隆间骨折	颧骨骨折;眶骨骨折;面部软组织挫伤;下肢静脉血栓形成;肝囊肿;胆囊结石;前列腺增生;前列腺结石	好转	王鉴顺	王鉴顺	219047	骨空隙骨水泥填充术;股骨骨折切开复位髓内针内固定术
575	H07骨科综合病区	2023-09-20	2023-09-28	3425517	戴翠花	女	95Y	股骨颈骨折	冠状动脉粥样硬化性心脏病;心房颤动;高血压;老年性心脏瓣膜病;下肢静脉血栓形成;主动脉瓣狭窄伴有关闭不全;退行性主动脉瓣疾患;二尖瓣反流;二尖瓣退行性变	治愈	潘孝云	薛星河	219082	人工股骨头置换术
576	H07骨科综合病区	2023-09-30	2023-10-11	3429825	陈明祥	男	78Y	髌骨骨折	胸腔积液;肺钙化;肺大疱;主动脉硬化;肝内胆管结石;2型糖尿病;脑卒中后遗症;腔隙性脑梗死;脑室扩张;老年性脑萎缩;肝钙化灶;下肢深静脉血栓形成;上颌窦炎	好转	王鉴顺	王鉴顺	219047	关节软骨修复术;髌骨骨折切开复位螺钉内固定术
577	H07骨科综合病区	2023-11-16	2023-11-28	3451269	林丙忠	男	71Y	髋臼骨折	髂骨骨折;耻骨分支骨折;骨盆骨折;髋部多处浅表损伤;胸腔积液;头皮血肿;肾损伤;肺部阴影;下肢静脉血栓形成;胆囊内胆汁淤积;肝包膜下积液;腹腔积液;肺占位性病变;脂肪肝;胆囊病变	好转	王鉴顺	王鉴顺		骨盆骨折切开复位钢板内固定术;髂动脉栓塞术;股动脉造影;骨盆带牵引术;髂骨骨折切开复位钢板内固定术;关节软骨修复术
578	H08胸外	2022-11-20	2023-01-04	3315394	邱少霞	女	69Y	创伤性蛛网膜下腔出血	肋骨骨折;腔隙性脑梗死;肺部感染;下肢静脉血栓形成;高血压病;脑挫伤;多发性脑梗死;头皮血肿;气管内异物;食管内异物;胸腔积液;肺大泡	治愈	黄宪平	章岳峰	吴威佳	食管瘘修补术;支气管镜检查术
579	H08胸外	2023-02-19	2023-03-08	3339797	金学祥	男	85Y	肺特指损伤	后天性肾囊肿;下肢动脉粥样硬化;慢性呼吸衰竭;肺性脑病;高血压病;肺挫伤;肋骨骨折;急性支气管炎;下肢静脉血栓形成	治愈	周伟鹤	周伟鹤	218331	胸腔穿刺置管术
580	H08胸外	2023-03-01	2023-03-29	3347996	朱良平	男	46Y	多发性肋骨骨折	股骨其他部位的骨折;肱骨大结节骨折;肾血肿;创伤性胸腔积液;胸椎骨折T1/T2;头皮挫伤;肺挫伤;创伤性气胸;肱骨外科颈骨折;肩胛骨骨折;腰椎骨折;下肢静脉血栓形成	治愈	杨文宇	周伟鹤	218331	肋骨骨折切开复位内固定术;胸廓成形术;股骨骨折切开复位内固定术;下腔静脉造影;下腔静脉滤器置入术;下腔静脉滤器取出术;肱骨骨折切开复位钢板内固定术
581	H08胸外	2023-07-31	2023-08-10	3404555	林清波	男	77Y	创伤性胸腔积液	后天性肾囊肿;手术后状态，其他特指的;基底节出血;肋骨多处骨折;下肢静脉血栓形成;类风湿性关节炎;多发性肝囊肿	好转	杨文宇	周伟鹤	谷利中	胸腔穿刺术
582	H08胸外	2023-07-12	2023-08-14	3406344	吴明权	男	71Y	创伤性血胸	特发性(原发性)高血压;创伤性胸腔积液;腰椎间盘突出;胸椎退行性病变;后天性肾囊肿;下肢动脉血栓形成;肾上腺血肿;肋骨多处骨折;肌腱和肌肉损伤;脂肪肝;胆囊结石;双侧腹股沟疝;下肢动脉粥样硬化	治愈	周伟鹤	周伟鹤	吴威佳	胸腔镜下胸腺病损切除术;胸腔镜下肺修补术
583	H08胸外	2023-08-04	2023-09-12	3418919	刘耀升	男	55Y	膈疝	肋骨多处骨折;皮肤挫伤;创伤性湿肺;液气胸;肺挫伤;肝挫伤;肾挫伤;上肢开放性伤口;胸椎骨折;骨盆骨折;特发性(原发性)高血压;下肢静脉血栓形成;肩胛骨骨折;在肩和上臂水平的肌肉和肌腱的损伤;肾上腺血肿;肩关节扭伤;胸腔积液	治愈	赵曙光	赵曙光	谷利中	经腹膈疝修补术
584	H08胸外	2023-09-16	2023-10-10	3429703	王昌敏	男	63Y	肺动脉栓塞	肺部感染;创伤性湿肺;骶骨骨折;骨盆骨折;髂骨骨折;下肢深静脉血栓形成;特发性(原发性)高血压;手术后状态，其他特指的;肋骨骨折;肝术后;腹壁挫伤;创伤性血气胸	治愈	赵曙光	赵曙光	谷利中
585	H08胸外	2023-09-14	2023-10-30	3438234	郑碎莲	女	85Y	创伤性胸腔积液	头皮血肿;陈旧性胫腓骨骨折;胫腓骨干骨折;肝囊肿;后天性肾囊肿;腔隙性脑梗死;肺不张;耻骨骨折;肋骨多处骨折;髋臼骨折;后天性踝关节畸形;下肢静脉血栓形成	治愈	赵曙光	赵曙光	谷利中	胸腔穿刺术;静脉穿刺术
586	H08胸外	2023-10-27	2023-11-14	3444806	高振余	男	53Y	肺上叶恶性肿瘤	陈旧性肋骨骨折;后天性肾囊肿;下肢静脉血栓形成	治愈	赵曙光	赵曙光	谷利中	胸腔镜下肺叶切除术
587	H08胸外	2023-10-18	2023-12-03	3453291	钟圣满	男	73Y	肺上叶恶性肿瘤	肺的其他疾患;肋骨多处骨折;创伤性气胸;创伤性胸腔积液;耳廓开放性损伤;锁骨骨折;肩锁关节脱位;耻骨骨折;浅表损伤;胃恶性肿瘤;下肢动脉粥样硬化;下肢静脉血栓形成;肾结石;胸膜粘连	治愈	黄宪平	黄宪平	朱栋辉	胸腔镜下肺叶部分切除术;胸腔镜胸内淋巴结清扫术;胸腔镜下胸膜粘连松解术
588	H08胸外	2023-11-30	2023-12-27	3463904	王绍兴	男	81Y	创伤性胸腔积液	肋骨多处骨折;腰椎骨折;肺挫伤;心包积液;创伤性皮下气肿;急性肠炎;尿频;二尖瓣反流;三尖瓣疾病,其他的;肺动脉高压中度;单侧腹股沟疝;肾积水伴肾结石;胸椎退行性病变;肝囊肿;后天性肾囊肿;腰椎退行性病变;鞘膜积液;下肢静脉血栓形成;肾萎缩(终末期)	治愈	赵曙光	谷利中	谷利中	胸腔镜胸膜腔引流
589	H09胃肠外科	2023-09-26	2023-11-25	3449845	曾国英	女	87Y	结肠恶性肿瘤	肝继发恶性肿瘤;结肠穿孔;低蛋白血症;肠梗阻;创伤后伤口感染;胸腔积液;静脉血栓形成;下肢动脉粥样硬化;后天性肾囊肿;胆囊切除术后状态;骨折术后恢复期	好转	俞耀军	李利义	陈健	右半结肠根治性切除术;肠粘连松解术
590	H10胆胰外科	2023-08-01	2023-09-16	3420032	蔡香花	女	70Y	开放性胫骨骨折	腕骨骨折;上肢开放性伤口;小腿开放性伤口;多处挫伤;多处开放性伤口;腓骨骨折;肱骨近端骨折;多发性脑梗死;胸骨骨折;股骨骨折;肋骨多处骨折;耳廓挫伤;胆囊结石伴慢性胆囊炎;下肢静脉血栓形成;老年性脑萎缩;子宫平滑肌瘤;胸腔积液	好转	金洲祥	金洲祥	219079	皮瓣修整术;胫骨骨折切开复位钢板内固定术;腹腔镜下胆囊切除术;胫骨外固定装置去除术;内镜下胆管置管引流术;创面封闭式负压引流术（VSD);腹腔镜下胆道探查术;胫骨骨折闭合复位螺钉内固定术;股骨骨折闭合复位螺钉内固定术;皮肤和皮下组织非切除性清创
591	H10胆胰外科	2023-09-25	2023-09-28	3425425	郑更升	男	83Y	慢性萎缩性胃炎	糖尿病;下肢动脉粥样硬化;下肢深静脉血栓形成;肾结石;后天性肾囊肿;前列腺增生;腰椎骨折L1	未愈	王文星	卢光荣	周羽翙	结肠镜检查;胃镜检查
592	H10胆胰外科	2023-09-30	2023-10-20	3433820	陈碎香	女	54Y	创伤性脾破裂	腹腔积液;下肢深静脉血栓形成;肋骨骨折;肺病;肺大疱	治愈	王飞海	周磊	潘传孟	腹腔冲洗检查;股静脉穿刺术;下腔静脉滤器置入术;全脾切除术
593	H11颈部外科	2022-12-25	2023-01-03	3314853	杨福友	男	68Y	髌骨骨折	下肢静脉血栓形成;静脉栓塞和血栓形成;前列腺增生;肝血管瘤;下肢动脉粥样硬化;前列腺结石	治愈	陈龙	应晓洲	应晓洲	关节软骨修复术;髌骨骨折切开复位螺钉内固定术
594	H11颈部外科	2023-04-09	2023-04-26	3359337	林月莲	女	80Y	股骨粗隆间骨折	后天性肾囊肿;下肢动脉粥样硬化;肝囊肿;脂肪肝;下肢静脉血栓形成;心功能不全	好转	陈华	孙辽军	王特	肱骨骨折闭合复位螺钉内固定术
595	H11颈部外科	2023-06-29	2023-07-08	3389241	梅楷弟	男	68Y	踝关节骨折	下肢动脉粥样硬化;静脉血栓形成;下肢静脉曲张;脾大;特发性肺纤维化	好转	陈龙	陈龙	王特	踝关节骨折切开复位钢板内固定术
596	H11颈部外科	2023-08-09	2023-08-19	3408330	黄光妹	女	78Y	股骨颈骨折	腰椎间盘突出;后天性肾囊肿;高血压;肾型过敏性紫癜;下肢静脉血栓形成;心功能不全	好转	陈龙	陈龙	王特	人工股骨头置换术;髋轴面，陶瓷与聚乙烯;髋关节滑膜切除术
597	H11颈部外科	2023-08-11	2023-08-22	3409737	陈青妹	女	73Y	髌骨骨折	膝关节退行性病变;下肢静脉血栓形成;心功能不全;糖尿病	好转	陈龙	陈龙	王特	髌韧带重建术;下腔静脉滤器置入术;股静脉穿刺术;髌骨骨折切开复位螺钉内固定术
598	H11颈部外科	2023-08-09	2023-08-28	3412435	沈美媛	女	53Y	胫腓骨闭合性骨折	下肢静脉血栓形成;胆囊息肉;胆囊胆固醇沉着症	好转	翁益民	翁益民	项光恒	胫骨骨折切开复位钢板内固定术
599	H11颈部外科	2023-09-09	2023-09-26	3424346	胡均和	男	50Y	股骨粗隆间骨折	下肢静脉血栓形成;桡骨远端骨折;特发性(原发性)高血压;肋骨多处骨折	好转	翁益民	翁益民	王特	股骨骨折闭合复位螺钉内固定术
600	H11颈部外科	2023-10-21	2023-11-07	3442008	闫俊明	男	48Y	股骨多处骨折	股骨粗隆下骨折;耻骨骨折;下肢静脉血栓形成;骶骨骨折	治愈	陈龙	应晓洲	应晓洲	股骨骨折切开复位钢板内固定术;股骨移植术
601	H11颈部外科	2023-11-09	2023-11-17	3446144	邹爱兰	女	85Y	股骨骨折	人工关节术后;高血压;2型糖尿病;下肢静脉血栓形成;心功能不全;脂肪肝;胆囊结石	好转	黄俊武	余贤斌	郑文浩	股骨骨折闭合复位螺钉内固定术
602	H11颈部外科	2023-12-17	2023-12-30	3464878	范良妹	女	88Y	股骨颈骨折	髋关节置换术后;特发性(原发性)高血压;骨质疏松;胸腔积液;后天性肾囊肿;下肢静脉肌间血栓形成	好转	孔建中	翁益民	王特	人工股骨头置换术
603	H12肝脾外科	2023-01-30	2023-02-22	3333910	邹培良	男	94Y	胆总管结石伴胆管炎	膀胱憩室;骨化性肌炎;肱骨上端骨折;心功能不全;下肢静脉血栓形成;大隐静脉曲张;急性胆源型胰腺炎，重症;肺炎;多发性肝囊肿;后天性肾囊肿	治愈	刘海斌	陈辉2	鲍海力	胆囊造口术;超声引导下胆管穿刺引流术
604	H12肝脾外科	2023-02-19	2023-02-26	3335558	周菜娣	女	87Y	胆囊炎	胆囊结石;肺恶性肿瘤;陈旧性肺结核;肺结节;脊柱压缩性骨折;多发性肝囊肿;肾结石;副脾;高血压病;2型糖尿病;阑尾炎;下肢特指深部脉管静脉炎和血栓性静脉炎	好转	刘海斌	刘海斌	鲍海力
605	H13内分泌血管外科	2023-01-16	2023-01-30	3324983	张顺记	男	55Y	内踝骨折	下肢静脉血栓形成;脂肪肝;胆囊息肉	好转	陈聪	艾鹏	郑继行	踝关节骨折切开复位螺钉内固定术;下腔静脉滤器取出术;下肢静脉造影;下腔静脉滤器置入术
606	H13内分泌血管外科	2023-01-27	2023-02-15	3331406	牟加福	男	78Y	下肢深静脉血栓形成	多发性脑梗死;股骨骨折;肱骨骨折;睾丸鞘膜积液;肺部感染	好转	陈聪	陈聪	高自勉
607	H13内分泌血管外科	2023-03-15	2023-03-20	3344586	吴春竹	女	69Y	下肢深静脉血栓形成	高血压病;股骨粗隆间骨折	好转	邓超频	陈聪	高自勉	下肢动脉造影
608	H13内分泌血管外科	2023-03-28	2023-04-01	3349110	陈小云	女	60Y	下肢深静脉血栓形成	闭合性胫骨平台骨折;高血压病;慢性乙型病毒性肝炎;低钾血症	好转	邓超频	陈聪	高自勉	下肢静脉造影
609	H13内分泌血管外科	2023-03-22	2023-04-09	3352294	郭四喜	男	71Y	闭合性胫骨平台骨折	取除下腔静脉滤器;膝关节损伤;胫骨髁间棘骨折;下肢静脉肌间血栓形成;高血压病	治愈	邓超频	陈聪	潘浩	下腔静脉滤器置入术;下肢静脉造影;皮肤和皮下组织血肿抽吸术;胫骨骨折切开复位钢板内固定术;胫骨植骨术;关节软骨修复术;下腔静脉滤器取出术;股静脉穿刺术
610	H13内分泌血管外科	2023-04-09	2023-04-12	3353536	樊丽芳	女	69Y	下肢深静脉血栓形成	髂静脉压迫综合征;肱骨外髁骨折;纤维囊性乳腺病	治愈	邓超频	艾鹏	陈魁	下腔静脉滤器置入术;静脉穿刺术;髂静脉球囊血管成形术;髂静脉支架置入术;髂静脉取栓术;股静脉取栓术;下肢静脉造影
611	H13内分泌血管外科	2023-03-26	2023-04-12	3353555	孙玉素	女	70Y	闭合性胫骨平台骨折	脂肪肝;特指趾骨骨折;膝关节十字韧带损伤;膝关节副韧带损伤;膝半月板撕裂;下肢静脉肌间血栓形成;腰椎间盘变性;腰椎间盘突出;腰椎退行性病变;膝关节积液;2型糖尿病;房性早搏;室性早搏;足挫伤;小腿挫伤;跖骨骨折	好转	邓超频	陈聪	陈魁	股静脉穿刺术;胫骨骨折切开复位钢板内固定术;胫骨植骨术;胫骨外固定术;下腔静脉滤器置入术;下腔静脉滤器取出术
612	H13内分泌血管外科	2023-04-22	2023-04-24	3358442	樊丽芳	女	69Y	取除下腔静脉滤器	纤维囊性乳腺病;肱骨外髁骨折;下肢深静脉血栓形成	其他	邓超频	艾鹏	陈魁	下腔静脉滤器取出术;下肢静脉造影
613	H13内分泌血管外科	2023-04-22	2023-05-08	3363779	张朝余	男	40Y	股骨干骨折	肝囊肿;脂肪肝;肾结石;慢性筛窦炎;慢性上颌窦炎;下肢静脉肌间血栓形成;脑震荡;髌骨骨折	治愈	邓超频	艾鹏	陈魁	下腔静脉滤器取出术;下腔静脉滤器置入术;下肢静脉造影;股骨骨折切开复位钢板内固定术
614	H13内分泌血管外科	2023-05-08	2023-05-17	3367636	王春香	女	87Y	下肢动脉硬化闭塞症	足溃疡;骨折术后;高血压;下肢静脉肌间血栓形成	治愈	邓超频	艾鹏	陈魁	股动脉穿刺术;股动脉球囊血管成形术
615	H13内分泌血管外科	2023-05-17	2023-05-24	3370506	叶陈品	男	53Y	下肢动脉血栓形成	陈旧性锁骨骨折;脂肪肝;脑软化灶;颈动脉硬化;下肢动脉硬化闭塞症;脑出血后遗症;多发性脑梗死;高血压;头皮血肿;胆囊息肉	治愈	邓超频	陈聪	郑继行	动脉穿刺术;髂动脉球囊血管成形术;髂动脉导管溶栓
616	H13内分泌血管外科	2023-06-03	2023-06-05	3375378	麻美云	女	57Y	取除下腔静脉滤器	骨折术后;下肢深静脉血栓形成	其他	邓超频	陈聪	陈魁	下腔静脉滤器取出术;下肢静脉造影
617	H13内分泌血管外科	2023-06-04	2023-06-05	3375383	谢盛针	男	81Y	取除下腔静脉滤器	骨折术后;下肢深静脉血栓形成	其他	邓超频	艾鹏	陈魁	下腔静脉滤器取出术
618	H13内分泌血管外科	2023-06-15	2023-06-21	3381928	支汉中	男	63Y	下肢深静脉血栓形成	下肢动脉粥样硬化;膝关节积液;膝关节退行性病变;后天性脾缺失;创伤性血气胸;脑挫伤;腓骨骨折;鼻骨骨折;眉弓裂伤;肋骨多处骨折	治愈	邓超频	艾鹏	陈魁	下腔静脉滤器置入术;下肢静脉置管溶栓术;下肢静脉球囊扩张成形术
619	H13内分泌血管外科	2023-06-26	2023-06-27	3384381	吴冬香	女	62Y	取除下腔静脉滤器	下肢深静脉血栓形成;胫骨平台骨折;骨折术后;髋臼骨折	其他	邓超频	陈聪	陈魁	下肢静脉造影;下腔静脉滤器取出术
620	H13内分泌血管外科	2023-06-27	2023-07-01	3385944	郑友锡	男	55Y	下肢深静脉血栓形成	骨折术后恢复期;前列腺增生;脂肪肝	好转	邓超频	陈聪	高自勉	下肢静脉造影
621	H13内分泌血管外科	2023-07-01	2023-07-03	3386974	支汉中	男	63Y	下肢深静脉血栓形成	下肢动脉粥样硬化;脾术后;脑挫伤;肋骨多处骨折;创伤性血气胸;鼻骨骨折;腓骨骨折;膝关节积液;膝关节退行性病变;取除下腔静脉滤器	治愈	邓超频	艾鹏	陈魁	髂静脉支架置入术;置入一根血管的支架;下肢静脉造影;下腔静脉滤器取出术;单根血管操作;髂静脉球囊血管成形术
622	H13内分泌血管外科	2023-07-08	2023-07-10	3390083	刘延明	男	52Y	取除下腔静脉滤器	下肢静脉肌间血栓形成;骨折术后;枕骨骨折;肋骨多处骨折	其他	邓超频	艾鹏	郑继行	下肢静脉造影;下腔静脉滤器取出术
623	H13内分泌血管外科	2023-07-08	2023-07-10	3390085	厉龙进	男	69Y	取除下腔静脉滤器	下肢静脉肌间血栓形成;肋骨多处骨折;骨折术后;高血压;2型糖尿病;颈椎退行性病变;腔隙性脑梗死;骨盆骨折	其他	邓超频	艾鹏	陈魁	下肢静脉造影;下腔静脉滤器取出术
624	H13内分泌血管外科	2023-07-31	2023-08-07	3402952	叶云新	男	67Y	下肢深静脉血栓形成	胸椎退行性病变;脊柱侧弯;高血压;脊髓灰质炎的后遗症;后天性肾囊肿;前列腺结石;老年性脑萎缩;乳突炎;骨折术后	好转	邓超频	陈聪	高自勉	下肢静脉造影
625	H13内分泌血管外科	2023-08-12	2023-08-14	3406088	邹钊东	男	52Y	取除下腔静脉滤器	股骨粗隆间骨折;颈部脊髓损伤;骨折术后;下肢深静脉血栓形成	其他	邓超频	艾鹏	陈魁	下肢静脉造影;下腔静脉滤器取出术
626	H13内分泌血管外科	2023-08-16	2023-08-19	3408161	曾洪金	男	56Y	下肢深静脉血栓形成	骨折术后	好转	邓超频	陈聪	高自勉	髂静脉支架置入术;下腔静脉滤器置入术;下肢静脉置管溶栓术;两根血管操作;置入一根血管的支架;髂静脉造影;髂静脉球囊血管成形术
627	H13内分泌血管外科	2023-08-19	2023-08-21	3409357	叶妙妙	女	37Y	取除下腔静脉滤器	下肢深静脉血栓形成;尺骨骨折;肋骨多处骨折;肝挫伤;肾错构瘤;骨折术后	其他	邓超频	艾鹏	郑继行	下肢静脉造影;下腔静脉滤器取出术
628	H13内分泌血管外科	2023-09-24	2023-09-24	3423655	占秀芹	女	65Y	取除下腔静脉滤器	陈旧性腰椎骨折;孤立性肺结节;陈旧性肋骨骨折;颈椎椎管狭窄;脊柱骨软骨病;腰椎间盘突出;脊椎退行性病变;下肢深静脉血栓形成;脑外伤恢复期;颈椎间盘突出;颈椎退行性病变	其他	邓超频	艾鹏	高自勉	下腔静脉滤器取出术;下腔静脉造影
629	H13内分泌血管外科	2023-09-23	2023-09-25	3423875	曾洪金	男	56Y	取除下腔静脉滤器	下肢深静脉血栓形成;骨折术后恢复期;肝钙化灶;后天性肾囊肿;前列腺囊肿;前列腺结石;踝和足神经损伤	其他	邓超频	高自勉	陈魁	下腔静脉造影;下腔静脉滤器取出术
630	H13内分泌血管外科	2023-09-13	2023-09-25	3423884	郑克全	男	48Y	腰椎骨折	下肢静脉肌间血栓形成;肋骨多处骨折;马尾综合征;股骨粗隆间骨折	治愈	邓超频	陈聪	高自勉	腰椎骨折切开复位内固定术;下肢静脉造影;下腔静脉滤器取出术;股骨骨折闭合复位髓内针内固定术;下腔静脉滤器置入术
631	H13内分泌血管外科	2023-09-27	2023-09-28	3425533	吴贤付	男	65Y	取除下腔静脉滤器	多发性肝囊肿;脂肪肝;骨折术后;睡眠障碍;下肢深静脉血栓形成;后天性肾囊肿	其他	邓超频	陈聪	郑继行	下腔静脉造影;下腔静脉滤器取出术
632	H13内分泌血管外科	2023-10-07	2023-10-09	3429122	吴朝德	男	54Y	取除下腔静脉滤器	骨折术后;腰椎骨折;肋骨骨折;下肢静脉肌间血栓形成	其他	邓超频	艾鹏	郑继行	下腔静脉滤器取出术;下肢静脉造影
633	H13内分泌血管外科	2023-10-11	2023-10-14	3431156	黄美娟	女	77Y	下肢深静脉血栓形成	桡骨骨折;骨盆骨折;高血压;2型糖尿病;老年性脑萎缩;主动脉钙化	好转	邓超频	艾鹏	郑继行	下肢静脉造影
634	H13内分泌血管外科	2023-10-14	2023-10-16	3432106	章映	男	44Y	取除下腔静脉滤器	下肢深静脉血栓形成;骨折术后;2型糖尿病;脂肪肝;后天性肾囊肿;前列腺结石;下肢静脉肌间血栓形成	其他	邓超频	高自勉	陈魁	下肢静脉造影;下腔静脉滤器取出术
635	H13内分泌血管外科	2023-11-11	2023-11-18	3446548	吴银合	女	81Y	2型糖尿病性低血糖昏迷	2型糖尿病;高脂血症;高血压;帕金森病;睡眠障碍;腔隙性脑梗死;老年性脑萎缩;冠状动脉粥样硬化性心脏病;颈动脉硬化;下肢动脉粥样硬化闭塞症;胆囊结石;肝囊肿;肾结石;后天性肾囊肿;肋骨骨折;肺诊断性影像异常;肺大疱;下肢静脉肌间血栓形成;肺诊断性影像异常	好转	潘优津	戴志娟	施梦特
636	H13内分泌血管外科	2023-12-02	2023-12-04	3453636	李花妹	女	65Y	取除下腔静脉滤器	下肢静脉肌间血栓形成;骨折术后;高血压;2型糖尿病;脂肪肝	其他	郑祥韬	艾鹏	郑继行	下腔静脉滤器取出术;下肢静脉造影
637	H13内分泌血管外科	2023-12-09	2023-12-11	3456682	欧南华	男	60Y	取除下腔静脉滤器	下肢深静脉血栓形成;下肢动脉粥样硬化;骨折术后;尺骨茎突骨折;大多角骨骨折;肋骨骨折	其他	郑祥韬	高自勉	陈魁	下腔静脉滤器取出术;下肢静脉造影
638	H13内分泌血管外科	2023-12-09	2023-12-11	3456688	赵典凤	男	63Y	下肢深静脉血栓形成	周围血管支架植入术后状态;骨折术后;腰椎术后	好转	郑祥韬	艾鹏	陈魁	下肢静脉造影
639	H13内分泌血管外科	2023-12-16	2023-12-18	3459843	谢作銮	男	60Y	取除下腔静脉滤器	下肢静脉肌间血栓形成;2型糖尿病;骨折术后;脊椎退行性病变;腰椎间盘突出;腰椎椎管狭窄;肺诊断性影像异常	其他	郑祥韬	艾鹏	陈魁	下腔静脉滤器取出术;下肢静脉造影
640	H13内分泌血管外科	2023-12-18	2023-12-24	3462261	陈德英	女	65Y	髂静脉血栓形成	髌骨骨折;陈旧性肋骨骨折;肺诊断性影像异常;胆囊结石;后天性肾囊肿	治愈	郑祥韬	艾鹏	陈魁	下腔静脉滤器置入术;下肢静脉置管溶栓术;下肢静脉球囊扩张成形术;两根血管操作
641	H13内分泌血管外科	2023-12-24	2023-12-28	3464325	吴丰山	男	52Y	下肢深静脉血栓形成	下肢动脉粥样硬化;肺气肿;肝回声不均;肝钙化灶;胆囊息肉;慢性乙型病毒性肝炎;骨折术后	治愈	郑祥韬	艾鹏	潘浩	髂静脉支架置入术;下肢静脉置管溶栓术;下肢静脉支架置入术;下肢静脉造影;髂静脉球囊血管成形术;下腔静脉滤器置入术;置入两根血管的支架
642	H14呼吸内科	2023-02-23	2023-03-11	3340421	张时德	男	67Y	肺部感染	下肢动脉粥样硬化;支气管哮喘;下肢静脉肌间血栓形成;肺性脑病;肋骨骨折;呼吸衰竭;脂肪肝;肺大泡;梅毒;肺结节	治愈	林洁2	林洁2	邱章伟
643	H14呼吸内科	2023-02-28	2023-03-15	3342682	杨崇禧	男	85Y	糖尿病性高渗性高血糖状态昏迷	肺占位性病变;下肢静脉肌间血栓形成;肱骨外科颈骨折;肾衰竭;肺部感染;肺大泡;甲状腺结节	好转	林洁2	林洁2	218279
644	H14呼吸内科	2023-03-18	2023-03-27	3347406	张联余	男	69Y	肺部感染	下肢动脉粥样硬化;下肢静脉肌间血栓形成;腰椎间盘突出;腰椎椎管狭窄;脊柱压缩性骨折;2型糖尿病	好转	何剑波	何剑波	章国棉
645	H14呼吸内科	2023-03-27	2023-04-09	3352449	金爱玲	女	63Y	视神经脊髓炎	肺真菌感染;骨质疏松;脂肪肝;脊柱压缩性骨折;高血压病;胆囊结石;下肢静脉肌间血栓形成;颈椎间盘突出	好转	徐慧	徐慧	林慧	气管镜刷检术
646	H14呼吸内科	2023-04-07	2023-04-27	3359856	卢明章	女	69Y	肺部感染	肱骨髁上骨折;胸腔积液;支气管扩张;肺大泡;肺气肿;贫血;下肢静脉肌间血栓形成;肺曲霉病	好转	夏晓东	王道会	218278	肱骨骨折切开复位钢板内固定术;肱骨人工骨植骨术
647	H14呼吸内科	2023-07-19	2023-07-30	3399413	张维妹	女	78Y	肺部感染	下肢静脉肌间血栓形成;下肢动脉粥样硬化;肱骨髁上骨折;原发性双侧膝关节病;非毒性多个甲状腺结节;盆腔囊肿	好转	颜孙舜	颜孙舜	葛翔挺
648	H14呼吸内科	2023-09-27	2023-10-14	3431344	高芳柳	女	78Y	肺栓塞	主动脉钙化;肝内胆管结石;肾结石;后天性肾囊肿;肋骨骨折;腰椎间盘突出;下肢静脉肌间血栓形成;下肢动脉粥样硬化;结肠黑变病;腰椎术后;骨质疏松;甲状腺钙化;轻度肺动脉高压;间质性肺病;高血压性肾衰竭;乳房纤维囊性乳腺病;冠状动脉粥样硬化	好转	徐慧	邱章伟	219087
649	H14呼吸内科	2023-10-24	2023-11-05	3440688	金凤英	女	79Y	肺部感染	陈旧性肱骨骨折;陈旧性肋骨骨折;脑梗死;胸腔积液;下肢静脉肌间血栓形成;皮肤念珠菌病;脂肪肝;退行性主动脉瓣疾患;主动脉(瓣)关闭不全;二尖瓣反流	好转	何剑波	何剑波	章国棉
650	H14呼吸内科	2023-10-07	2023-11-16	3445954	于学凡	女	87Y	多发性骨盆骨折	耻骨骨折;髂骨骨折;骶骨骨折;支气管哮喘;肺部感染;冠状动脉粥样硬化性心脏病;心功能Ⅳ级;胸腔积液;2型糖尿病;高血压性心脏病;退行性主动脉瓣疾患;主动脉瓣关闭不全;二尖瓣反流;二尖瓣退行性变;子宫切除术后状态;下肢动脉硬化闭塞症;下肢水肿;下肢静脉肌间血栓形成	好转	夏晓东	夏晓东		盆骨外固定术;胸腔穿刺抽液术;胸腔闭式引流术;外部固定装置应用，单相系统
651	H14呼吸内科	2023-11-29	2023-12-16	3458857	陈建光	男	54Y	重症肺炎	呼吸衰竭;陈旧性肺结核;胸腔积液;肺气肿;轻度肺动脉高压;低蛋白血症;多发性面骨骨折;脑积水;肋骨骨折;下肢动脉粥样硬化;下肢静脉肌间血栓形成;毁损肺	好转	徐慧	邱章伟	俞丽华
652	H14呼吸内科	2023-12-09	2023-12-23	3461484	黄中顺	男	47Y	股骨干骨折	肺部感染;肺挫伤;肺诊断性影像异常;继发性贫血;下肢静脉肌间血栓形成	好转	徐慧	邱章伟	俞丽华	股骨骨折闭合复位髓内针内固定术
653	H14呼吸内科	2023-12-08	2023-12-31	3465183	周光妹	女	75Y	股骨颈骨折	发热;肺部感染;胸腔积液;高血压;痛风;胸膜钙化;陈旧性肋骨骨折;主动脉钙化;心功能不全;下肢静脉肌间血栓形成;脂肪肝;后天性肾囊肿;高血压	好转	徐慧	邱章伟	俞丽华	人工股骨头置换术
654	H15消化内科	2023-04-22	2023-04-28	3360067	陈招翠	女	75Y	消化道出血	下肢动脉粥样硬化;骨折治疗后恢复期;腔隙性脑梗死;高血压病;胸腔积液;痔;下肢静脉血栓形成;肺结节;特指手术后状态	好转	蔡振寨	裴继华	周羽翙
655	H15消化内科	2023-06-10	2023-06-15	3379150	黄雪梅	女	84Y	复合性溃疡伴出血	胸椎压缩性骨折;颈动脉硬化;下肢动脉粥样硬化;陈旧性肋骨骨折;慢性胃炎;肺部感染;胸腔积液;下肢静脉血栓形成;幽门螺旋杆菌感染	好转	蒋益	曹曙光	夏盛隆	胃镜检查
656	H15消化内科	2023-07-27	2023-08-04	3401563	徐冬花	女	93Y	胰腺恶性肿瘤	低蛋白血症;肾功能不全;高钾血症;腹腔积液;特发性(原发性)高血压;脑梗死;脊柱血管瘤;肺的其他疾患;肾萎缩(终末期);后天性肾囊肿;下肢动脉粥样硬化;下肢静脉血栓形成;陈旧性肋骨骨折;肝继发恶性肿瘤;肺部感染;胸腔积液;脓毒性休克	好转	蒋益	曹曙光	夏盛隆
657	K02康复	2022-12-07	2023-01-08	3316692	朱巧云	女	69Y	髋关节僵硬	脂肪肝;下肢动脉粥样硬化;下肢静脉血栓形成;腰骶神经根损害;髂骨骨折;涉及使用特指康复操作医疗;耻骨骨折;髋臼骨折;躯干部血管瘤;颈椎间盘突出;肺结节;2型糖尿病;腹水;头皮血肿;额骨骨折	好转	蒋松鹤	郑余银	黄世园
658	K02康复	2023-01-04	2023-01-16	3320207	邱少霞	女	69Y	食管异物穿孔	肋骨骨折;下肢动脉粥样硬化;下肢静脉血栓形成;低钾血症;涉及使用特指康复操作医疗;吞咽困难;言语障碍;运动障碍;食管溃疡;慢性胃炎;声带麻痹;蛛网膜下腔出血;脑挫伤;肺部感染;高血压病	治愈	屠文展	屠文展	李慧芳
659	K02康复	2022-12-29	2023-01-24	3323561	何有正	男	54Y	胸部脊髓损伤	截瘫;肿瘤性病理性骨折;肺恶性肿瘤;脊柱继发恶性肿瘤;腰椎退行性病变;腰椎间盘突出;下腔静脉血栓形成;前列腺结石;前列腺增生;神经源性肠;前列腺钙化灶;涉及使用特指康复操作医疗	好转	蒋松鹤	卢君艳	218289
660	K02康复	2022-12-27	2023-01-24	3323562	任家祥	男	56Y	胸部脊髓损伤	截瘫;脊髓病性膀胱;神经源性肠;下肢静脉血栓形成;褥疮;胸椎骨折;肩胛骨骨折;多发性肋骨骨折;颧骨骨折;多囊肝;泌尿道感染;后天性肾囊肿;涉及使用特指康复操作医疗	好转	蒋松鹤	卢君艳	218289
661	K02康复	2023-01-22	2023-03-05	3338013	蒋生相	男	46Y	马尾损伤	截瘫;吸入性肺炎;涉及使用特指康复操作医疗;肩关节积液;踝关节僵硬;肱骨破坏;下肢静脉肌间血栓形成;腰椎骨折L2;腰椎骨折L3;排便困难;腹部、下背和骨盆肌肉和肌腱损伤;肩部挫伤;上臂挫伤;三角肌损伤;肩胛下肌肌腱损伤	好转	蒋松鹤	郑余银	邹恩苗
662	K02康复	2023-02-26	2023-03-18	3343728	郑元宝	男	81Y	腔隙性脑梗死	人工膝关节;涉及使用特指康复操作医疗;高血压病;运动障碍;前列腺增生;不完全性肠梗阻;肺部感染;异常步态;多发性肋骨骨折;颈动脉硬化;锁骨下动脉粥样硬化;下肢动脉粥样硬化;下肢静脉肌间血栓形成;后天性踇外翻	好转	屠文展	屠文展	李慧芳
663	K02康复	2023-02-20	2023-03-20	3344709	林美珠	女	52Y	颈部脊髓功能损伤C5	体位性低血压;骨质疏松;胫腓骨下端骨折;腕和手水平特指肌肉和肌腱损伤;腕关节损伤;桡骨下端骨折;多发性胸椎骨折;颈椎骨折C7;颈椎骨折C6;下肢动脉粥样硬化;下肢静脉肌间血栓形成;脊髓病性膀胱;涉及使用特指康复操作医疗;四肢瘫痪	好转	蒋松鹤	卢君艳	程博
664	K02康复	2023-02-20	2023-03-22	3345359	朱巧云	女	69Y	关节痛	下肢动脉粥样硬化;额窦炎;下肢静脉肌间血栓形成;股动脉狭窄;颈椎间盘突出;涉及使用特指康复操作医疗;2型糖尿病;髋臼骨折;髂骨骨折;耻骨骨折;额骨骨折;肝功能异常;脂肪肝;高脂血症;躯干部血管瘤;肺结节;腰骶丛损伤	好转	蒋松鹤	郑余银	高丽萍
665	K02康复	2023-03-01	2023-04-03	3350277	何有正	男	54Y	胸部脊髓功能损伤	前列腺钙化灶;下腔静脉血栓形成;涉及使用特指康复操作医疗;肿瘤性病理性骨折;肺恶性肿瘤;前列腺增生;截瘫;骨继发恶性肿瘤;神经源性肠	好转	蒋松鹤	卢君艳	程博
666	K02康复	2023-03-18	2023-04-26	3359234	严其龙	男	65Y	膝关节痛	半月板损伤;闭合性胫骨平台骨折;下肢静脉曲张;下肢深静脉血栓形成;涉及使用其他康复操作的医疗;胫腓韧带远端撕裂;开放性足损伤;骨折术后;下肢动脉粥样硬化;原发性双侧膝关节病;踝关节痛;前列腺钙化灶;大腿挫伤;小腿擦伤;膝关节内侧副韧带损伤	好转	蒋松鹤	郑余银	高丽萍
667	K02康复	2023-04-10	2023-05-12	3364723	苏梅玉	女	88Y	髂骨骨折	脓毒血症;高血压病;泌尿道感染;胸腔积液;动脉硬化性脑病;颈内动脉狭窄;后天性肾囊肿;肾积水伴肾输尿管结石;颈动脉硬化;下肢动脉粥样硬化;多发性脑梗死;下肢静脉肌间血栓形成;急性脑病综合征;多发性肝囊肿;骨质增生	好转	蒋松鹤	郑余银	邹恩苗
668	K02康复	2023-04-11	2023-05-15	3366783	张敏	女	45Y	髋关节痛	涉及使用其他康复操作的医疗;坐骨骨折;髂骨骨折;耻骨骨折;下肢静脉血栓形成;髋臼骨折;泌尿道感染	好转	蒋松鹤	郑余银	邹恩苗
669	K02康复	2023-04-19	2023-05-18	3368012	赵月枝	女	56Y	髋关节痛	贫血;下肢静脉血栓形成;胸腔积液;腹水;骶骨骨折;耻骨骨折;脑挫伤;创伤后伤口感染;高血压病;多发性肋骨骨折;肾周积液;髋和大腿水平坐骨神经损伤;髋臼骨折;涉及使用其他康复操作的医疗	好转	蒋松鹤	郑余银	高丽萍
670	K02康复	2023-05-15	2023-06-03	3374600	张美娇	女	60Y	关节僵硬	骨折术后;动眼神经损伤;视神经损伤;下肢静脉血栓形成;肺挫伤;泌尿道感染;肋骨骨折;骨盆骨折;锁骨骨折;胫骨骨折;创伤性蛛网膜下腔出血;涉及使用其他康复操作的医疗;胸腔积液	好转	蒋松鹤	郑余银	邹恩苗
671	K02康复	2023-04-26	2023-06-10	3376921	林月莲	女	81Y	髋关节痛	腰椎压缩性骨折;后天性肾囊肿;涉及使用其他康复操作的医疗;脂肪肝;肝囊肿;股骨粗隆间骨折;腰椎退行性病变;下肢静脉肌间血栓形成	好转	蒋松鹤	郑余银	高丽萍
672	K02康复	2023-06-04	2023-07-05	3387722	夏金花	女	69Y	入脑前动脉血栓形成引起的脑梗死	运动障碍;涉及使用其他康复操作的医疗;膝关节退行性病变;肺部结节;脂肪肝;颈动脉硬化;大脑前动脉狭窄;椎动脉狭窄;椎动脉硬化;下肢动脉粥样硬化;异常步态;脑肿瘤切除史;骨质疏松伴有病理性骨折;2型糖尿病;高血压;睡眠障碍;腰椎间盘突出	好转	蒋松鹤	林海燕2	林乐2
673	K02康复	2023-06-10	2023-07-19	3394662	张美娇	女	60Y	膝关节僵硬	骨折术后;物理治疗;单纯性牙周炎;视神经损伤;多发性骨盆骨折;下肢静脉肌间血栓形成;肋骨多处骨折;锁骨骨折;胫骨骨折;动眼神经损伤	好转	蒋松鹤	郑余银	邹恩苗
674	K02康复	2023-06-26	2023-07-27	3398079	赵小房	男	47Y	臂丛神经损伤	股骨干骨折;胫骨平台骨折;骨折术后;物理治疗;距骨骨折;肩胛骨骨折;下肢静脉肌间血栓形成;肋骨骨折;膝关节积液;关节僵硬;脾术后;肺大疱;后天性肾囊肿;胸椎横突骨折	好转	蒋松鹤	郑余银	邹恩苗
675	K02康复	2023-06-27	2023-08-02	3400653	苏志猛	男	48Y	膝关节痛	胫骨平台骨折;膝关节内侧副韧带部分断裂;半月板损伤;胆囊胆固醇沉着症;前列腺结石;下肢静脉肌间血栓形成;脂肪肝;下肢静脉曲张;物理治疗	好转	蒋松鹤	郑余银	高丽萍	关节穿刺术
676	K02康复	2023-07-03	2023-08-02	3400943	林柳凤	女	56Y	颈部脊髓功能损伤	神经源性肠;神经源性膀胱;四肢瘫痪;颈椎术后;腕关节僵硬;桡骨远端骨折;颈椎间盘突出;下肢深静脉血栓形成;上肢静脉血栓形成;涉及使用其他康复操作的医疗	好转	蒋松鹤	卢君艳	程博
677	K02康复	2023-07-08	2023-08-05	3402039	宋立英	女	94Y	髋关节痛	原发性双侧膝关节病;肾结石;高同型半胱氨酸血症;间质性肺炎;下肢静脉肌间血栓形成;下肢动脉粥样硬化;中度贫血;骨折术后;物理治疗;耵聍栓塞;后天性肾囊肿	好转	蒋松鹤	林海燕2	林乐2
678	K02康复	2023-07-12	2023-08-19	3408425	杨爱兰	女	74Y	脑挫伤	下肢静脉血栓形成;腔隙性脑梗死;胆囊结石;肝囊肿;后天性肾囊肿;高血压;大肠杆菌作为分类于其他章疾病的原因;甲状腺术后;创伤性硬膜下出血;创伤性蛛网膜下出血;骨折术后恢复期;肋骨多处骨折;创伤性湿肺;胸腔积液;创伤性耳聋;锁骨骨折	好转	蒋松鹤	林海燕2	林乐2
679	K02康复	2023-08-14	2023-08-28	3412402	蔡爱娥	女	67Y	肩关节僵硬	锁骨骨折;肩胛骨骨折;物理治疗;低钾血症;急性阑尾炎;2型糖尿病;下肢静脉肌间血栓形成;高血压;皮下血肿;颈椎间盘突出;眶骨骨折;额骨骨折;脑挫伤;胸椎压缩性骨折;肋骨多处骨折	好转	蒋松鹤	林海燕2	林乐2
680	K02康复	2023-08-01	2023-08-30	3413253	林松美	女	65Y	髋关节痛	髌骨骨折;髋关节置换术后;下肢静脉肌间血栓形成;慢性胃炎;物理治疗	好转	蒋松鹤	郑余银	邹恩苗
681	K02康复	2023-08-07	2023-08-31	3413525	陈爱菊	女	61Y	局灶性大脑挫裂伤	创伤性硬膜下出血;创伤性硬脑膜外血肿;创伤性蛛网膜下腔出血;枕骨骨折;颅腔积气;高血压;孤立性肺结节;低钠血症;冠状动脉粥样硬化性心脏病;下肢动脉粥样硬化;下肢静脉肌间血栓形成;下肢静脉曲张	好转	屠文展	屠文展	陈文斯
682	K02康复	2023-08-03	2023-09-04	3415192	吴文雪	女	55Y	关节痛	骨折术后恢复期;胫腓骨下端骨折;物理治疗;下肢静脉肌间血栓形成;低钾血症;脂肪肝;2型糖尿病;高血压;尺骨桡骨闭合性骨折;髌骨骨折;股骨骨折	好转	蒋松鹤	林海燕2	林乐2
683	K02康复	2023-08-21	2023-09-20	3421800	向仕见	男	49Y	关节痛	骨折术后;物理治疗;三角骨骨折;钩骨骨折;掌骨基底骨折;腋神经损伤;前臂桡神经损伤;眶骨骨折;筛窦骨折;胸腔积液;肾上腺肿物;肾周积液;腰椎骨折;肋骨骨折;脂肪肝;胆汁淤积症;阑尾疾病;高血压;下肢深静脉血栓形成;月骨骨折	好转	蒋松鹤	郑余银	邹恩苗
684	K02康复	2023-08-22	2023-09-24	3423230	吴迎春	男	70Y	弥散性大脑损伤伴出血	高血压;下肢静脉肌间血栓形成;孤立性肺结节;后天性肾囊肿;前列腺增生;甲状腺结节;下肢动脉粥样硬化;腰椎间盘突出;肝囊肿;前列腺钙化灶;创伤性硬脑膜下积液;脑出血后物理康复训练;肋骨骨折;肩胛骨骨折;腰椎骨折;肺大疱	好转	屠文展	屠文展	陈文斯
685	K02康复	2023-07-28	2023-10-12	3430377	李成赚	男	59Y	开放性心包积血	下肢静脉肌间血栓形成;肋骨骨折;肾结石;2型糖尿病;高血压;颈椎间盘突出;高脂血症;肺的其他损伤;短暂性脑缺血发作;脱髓鞘性脑病;外踝骨折;关节僵硬;创伤性湿肺;创伤性胸腔积液	好转	蒋松鹤	林海燕2	林乐2	皮肤和皮下组织非切除性清创;心包血块清除术;心脏破裂修补术;胸腔闭式引流术
686	K02康复	2023-09-27	2023-10-28	3437472	王叔垟	男	49Y	圆锥马尾综合征	运动障碍;物理治疗;神经源性肠;腰椎术后;胸椎骨折T5/T6;胸椎退行性病变;骨折术后;下肢静脉肌间血栓形成;泌尿道感染	好转	蒋松鹤	卢君艳	林心心
687	K02康复	2023-09-09	2023-10-31	3438973	贺杰芳	男	42Y	胸部脊髓功能损伤T10/T11	物理治疗;泌尿道感染;骨折术后;腰椎骨折;脊髓病性膀胱;截瘫;神经源性肠;足部烧伤;胆囊结石伴有急性胆囊炎;肾结石;中度贫血;肋骨骨折;下肢静脉肌间血栓形成	好转	蒋松鹤	林海燕2	林乐2
688	K02康复	2023-11-11	2023-11-22	3448724	袁少玉	女	64Y	脑出血后物理康复训练	运动障碍;肩关节僵硬;脑出血后遗症;2型糖尿病;肝炎后肝硬化;肩手综合征;胆囊结石伴胆囊炎;下肢静脉肌间血栓形成;颈动脉硬化;下肢动脉粥样硬化;肾错构瘤;乳腺增生;脾血管瘤;骨折术后	其他	屠文展	屠文展	李慧芳
689	K02康复	2023-11-12	2023-11-28	3451087	南蚕莲	女	59Y	腰椎间盘突出	腰椎术后;腰椎退行性病变;骨质疏松伴有病理性骨折;胸椎术后;下肢静脉肌间血栓形成;高血压;低钾血症;物理治疗	好转	蒋松鹤	郑余银	高丽萍
690	K02康复	2023-11-14	2023-12-10	3456028	洪延松	男	52Y	马尾损伤	腰椎术后;骨折术后恢复期;跟骨骨折;创伤性湿肺;胸腔积液;腹腔积液;下肢静脉肌间血栓形成;室上性心动过速;泌尿道感染;胆囊结石;肝囊肿	好转	蒋松鹤	卢君艳	程博
691	K02康复	2023-11-14	2023-12-13	3457512	陈微	女	48Y	髋关节僵硬	骨折术后恢复期;物理治疗;腰骶丛损伤;高血压;高尿酸血症;下肢静脉肌间血栓形成	好转	蒋松鹤	郑余银	高丽萍
692	K02康复	2023-10-14	2023-12-19	3459994	Я无名681	男	40Y	开放性胫骨下端骨折	开放性胫骨上端骨折;创伤性休克;开放性桡骨骨折;耻骨骨折;创伤性腹膜后血肿;颅底骨折;颅腔积气;创伤性蛛网膜下腔出血;脑挫伤;寰椎骨折;寰枕关节半脱位;胸椎骨折T5/T6;肩部损伤;臂丛神经损伤;副神经损伤;肺部感染;下肢静脉肌间血栓形成;腰椎间盘突出;骶骨骨折	好转	蒋松鹤	林海燕2	林乐2	胫骨骨折切开复位钢板内固定术;腓骨骨折切开复位螺钉内固定术;胫骨人工骨植骨术;桡骨骨折切开复位钢板内固定术;桡骨人工骨植骨术
693	K02康复	2023-12-09	2023-12-27	3463636	姚员宝	男	48Y	马尾损伤	创伤性截瘫;物理治疗;腰椎术后;骨折术后;腰椎间盘突出;腰椎退行性病变;2型糖尿病;高血压;脂肪肝;肾结石;前列腺结石;下肢静脉肌间血栓形成	好转	蒋松鹤	卢君艳	林心心
694	K06康复	2022-12-07	2023-01-11	3318112	滕云青	男	51Y	颈部脊髓损伤	神经源性肠;皮肤感觉异常;颈椎骨折;颈椎椎管狭窄;颈椎间盘突出;下肢动脉粥样硬化;下肢静脉血栓形成;下肢深静脉瓣膜机能不全;慢性胃炎;泌尿道感染;踝和足烧伤;涉及使用特指康复操作医疗;脊髓病性膀胱;四肢瘫痪	好转	蒋松鹤	卢君艳	218289
695	K06康复	2023-01-05	2023-01-18	3320742	陈献忠	男	55Y	腕关节僵硬	下肢静脉血栓形成;涉及使用特指康复操作医疗;股骨干骨折;桡骨下端骨折;腰椎骨折;耻骨骨折;腰椎退行性病变;脂肪肝	好转	蒋松鹤	郑余银	陈文斯
696	K06康复	2023-01-18	2023-01-25	3323636	朱巧云	女	69Y	髋关节僵硬	脂肪肝;肺结节;颈椎间盘突出;躯干部血管瘤;髋臼骨折;耻骨骨折;涉及使用特指康复操作医疗;慢性额窦炎;髂骨骨折;腰骶部脊髓神经丛损伤;下肢静脉血栓形成;下肢动脉粥样硬化;颅底骨折;头皮血肿;腹水;2型糖尿病	好转	蒋松鹤	郑余银	邹恩苗
697	K06康复	2022-12-28	2023-01-28	3324819	徐月红	女	65Y	腕关节僵硬	髋关节僵硬;踝关节僵硬;桡骨下端骨折;眶骨骨折;腰椎骨折;多发性肋骨骨折;眼挫伤;高血压病;2型糖尿病;多发性脑梗死;下肢静脉血栓形成;急性扁桃体炎;大脑血管特指畸形;腓骨骨折;颧骨骨折;上颌骨骨折;鼻骨骨折;眼睑裂伤;基底动脉狭窄	好转	蒋松鹤	郑余银	邹恩苗
698	K06康复	2022-12-14	2023-01-28	3325129	钱曼菲	女	72Y	踝关节僵硬	腔隙性脑梗死;骨密度和结构特指疾患;颈椎关节强硬;Ⅰ度房室传导阻滞;脂肪肝;静脉栓塞和血栓形成;下肢动脉粥样硬化;帕金森病;2型糖尿病;高血压病;外踝骨折	好转	蒋松鹤	郑余银	黄世园
699	K06康复	2023-01-04	2023-02-01	3327238	刘龙光	男	64Y	颈部脊髓损伤	后天性肾囊肿;肾结石;下肢静脉血栓形成;胸腔积液;颈椎间盘突出;非器质性失眠症;体位性低血压;脊髓病性膀胱;神经源性肠;四肢瘫痪;特指颈椎骨折	好转	蒋松鹤	卢君艳	林乐2
700	K06康复	2023-01-16	2023-02-21	3333699	赵纯银	男	37Y	颈部脊髓损伤	腓骨骨折;躯干部血管瘤;静脉栓塞和血栓形成;泌尿道感染;颈椎椎管狭窄;胸椎骨折;腰椎骨折;涉及使用特指康复操作医疗;四肢瘫痪;颈椎骨折;脊髓病性膀胱;肺挫伤;肾挫伤;创伤性肾血肿;肌腱和肌肉损伤;肋骨骨折;神经源性肠	好转	蒋松鹤	卢君艳	程博
701	K06康复	2023-01-24	2023-02-22	3334207	任家祥	男	56Y	胸部脊髓损伤	下肢静脉血栓形成;神经源性肠;多发性腰椎骨折;脊髓病性膀胱;多发性肋骨骨折;颧骨骨折;多发性肝囊肿;后天性肾囊肿;涉及使用特指康复操作医疗;截瘫;褥疮;胸椎骨折;肩胛骨骨折	好转	蒋松鹤	卢君艳	218289
702	K06康复	2023-01-11	2023-02-26	3335718	滕云青	男	51Y	颈部脊髓损伤	颈椎骨折;颈椎椎管狭窄;颈椎间盘突出;四肢瘫痪;静脉栓塞和血栓形成;泌尿道感染;躯干烧伤;涉及使用特指康复操作医疗;脊髓病性膀胱;神经源性肠;下肢动脉粥样硬化	好转	蒋松鹤	卢君艳	程博
703	K06康复	2023-01-09	2023-03-01	3336724	程光明	男	60Y	髋关节僵硬	涉及使用特指康复操作医疗;创伤后伤口感染;耻骨骨折;下肢静脉肌间血栓形成;下肢动脉粥样硬化;后天性肾囊肿;脂肪肝;髋臼骨折	好转	蒋松鹤	郑余银	邹恩苗
704	K06康复	2023-02-12	2023-03-12	3341225	徐月红	女	66Y	关节僵硬	多发性脑梗死;下肢静脉肌间血栓形成;涉及使用特指康复操作医疗;高血压病;多发性肋骨骨折;桡骨下端骨折;鼻中隔骨折;颧弓骨折;颅内损伤;髋臼骨折;眼挫伤;眼睑裂伤;腓骨骨折;耻骨骨折;骶骨骨折;腰椎骨折;2型糖尿病;上颌骨骨折;眶骨骨折	好转	蒋松鹤	郑余银	高丽萍
705	K06康复	2023-02-26	2023-03-15	3342669	陈显忠	男	54Y	髋关节痛	髋关节僵硬;涉及使用特指康复操作医疗;胆囊结石;高血压病;手术后腹腔出血;肋骨骨折;下肢静脉血栓形成;多脏器损伤;髋和大腿水平坐骨神经损伤;后天性肾囊肿	好转	蒋松鹤	郑余银	高丽萍
706	K06康复	2023-02-20	2023-03-22	3345632	龚翠菊	女	81Y	髋关节痛	帕金森病;下肢静脉肌间血栓形成;胆囊切除术后状态;涉及使用特指康复操作医疗;高血压病;股骨粗隆间骨折;泌尿道感染;肝囊肿;脂肪肝	好转	蒋松鹤	郑余银	邹恩苗
707	K06康复	2023-03-23	2023-03-24	3346141	郑元宝	男	81Y	腔隙性脑梗死	异常步态;颈动脉硬化;锁骨下动脉粥样硬化;下肢动脉粥样硬化;下肢静脉肌间血栓形成;后天性踇外翻;人工膝关节;涉及使用特指康复操作医疗;高血压病;运动障碍;肋骨骨折;前列腺增生	好转	屠文展	屠文展	李慧芳
708	K06康复	2023-02-27	2023-03-27	3347341	赵纯银	男	37Y	颈部脊髓功能损伤C4	神经源性肠;肾挫伤;颈椎骨折;泌尿道感染;躯干部血管瘤;胫腓骨干骨折;肾上腺损伤;多发性腰椎骨折;多发性肋骨骨折;多发性胸椎骨折;四肢瘫痪;下肢静脉肌间血栓形成;脊髓病性膀胱;涉及使用特指康复操作医疗	好转	蒋松鹤	程博	程博
709	K06康复	2023-03-18	2023-04-04	3350486	谢雪燕	女	58Y	关节痛	高脂血症;特指手术后状态;股骨下端骨折;尺骨下端骨折;耻骨骨折;下肢动脉粥样硬化;多发性肋骨骨折;涉及使用特指康复操作医疗;腰椎间盘突出;下肢静脉肌间血栓形成	好转	蒋松鹤	郑余银	邹恩苗
710	K06康复	2023-02-25	2023-04-06	3351366	姚福珍	女	76Y	骶骨骨折	脂肪肝;骨质疏松;耻骨骨折;下肢静脉肌间血栓形成	好转	蒋松鹤	郑余银	高丽萍
711	K06康复	2023-03-25	2023-04-28	3360105	蒋生相	男	45Y	马尾损伤	上臂挫伤;多发性腰椎骨折;骨折术后;下肢静脉肌间血栓形成;肘关节关节病;肘关节痛;肩关节积液;肩关节痛;胃穿孔;涉及使用其他康复操作的医疗;肩胛下肌肌腱损伤;三角肌损伤;创伤性三角肌断裂	好转	蒋松鹤	郑余银	邹恩苗
712	K06康复	2023-04-28	2023-05-06	3363173	陈招翠	女	75Y	髋关节痛	涉及使用其他康复操作的医疗;股骨粗隆下骨折;多发性腰椎骨折;腰部脊髓损伤;多发性肋骨骨折;下肢静脉肌间血栓形成;颈椎病;腰椎间盘突出;高血压病;跖骨骨折;耻骨骨折;骶骨骨折;胸椎骨折;骨质疏松;胸腔积液;肺结节	好转	蒋松鹤	郑余银	高丽萍
713	K06康复	2023-04-01	2023-05-09	3364299	孔繁财	男	53Y	颈部脊髓功能损伤	涉及使用其他康复操作的医疗;低钠血症;上颌窦骨折;颧弓骨折;蝶骨骨折;腰椎压缩性骨折;创伤性胸腔积液;胸椎压缩性骨折;四肢瘫痪;下肢静脉肌间血栓形成;脊髓病性膀胱;神经源性肠;头皮血肿;创伤性蛛网膜下腔出血;创伤性硬膜外血肿;脑挫伤	好转	蒋松鹤	卢君艳	程博
714	K06康复	2023-04-03	2023-05-13	3365974	潘升亮	男	63Y	胸部脊髓功能损伤T10/T11	下肢动脉粥样硬化;神经源性肠;肋骨骨折;泌尿道感染;肺大泡;肺气肿;下肢静脉血栓形成;截瘫;脊髓变性;低蛋白血症;甲状腺囊肿;胸椎压缩性骨折;肾结石;涉及使用其他康复操作的医疗;后天性肾囊肿	好转	蒋松鹤	卢君艳	黄倩倩2
715	K06康复	2023-04-30	2023-05-20	3368564	蒋生相	男	45Y	马尾损伤	急性上呼吸道感染;截瘫;肩关节痛;肱骨头骨折;肩关节积液;肘关节僵硬;肘关节关节病;下肢静脉肌间血栓形成;涉及使用其他康复操作的医疗;胃术后;肩胛下肌肌肉损伤;三角肌损伤;多发性腰椎骨折;下背肌肉损伤;上臂挫伤	好转	蒋松鹤	郑余银	邹恩苗
716	K06康复	2023-04-12	2023-05-22	3369573	胡竹兰	女	76Y	髋关节置换术后疼痛	涉及使用其他康复操作的医疗;后天性肾囊肿;双侧小肾;肾结石;高血压;痔不伴有并发症;低钾血症;胆囊结石伴胆囊炎;原发性双侧膝关节病;骨质疏松，其他的;股骨颈骨折;泌尿道感染;胸腔积液;下肢静脉肌间血栓形成	好转	蒋松鹤	郑余银	邹恩苗	关节穿刺术
717	K06康复	2023-05-07	2023-06-10	3377247	刘龙光	男	64Y	颈部脊髓功能损伤C4	四肢瘫痪;颈椎骨折C3;颈椎术后;眼术后;肾积水伴肾结石;后天性肾囊肿;涉及使用其他康复操作的医疗;下肢静脉肌间血栓形成;高脂血症;膀胱结石;泌尿道感染;睡眠障碍;神经源性肠;颈椎间盘突出;脊髓病性膀胱	好转	蒋松鹤	卢君艳	程博
718	K06康复	2023-05-05	2023-06-13	3378511	朱金友	男	64Y	关节僵硬	腹股沟斜疝;颅骨骨折;脑挫伤;肺挫伤;下肢静脉肌间血栓形成;下肢动脉粥样硬化;肋骨多处骨折;骨折术后;手部指内在肌和肌腱损伤;肾挛缩;后天性肾囊肿	好转	蒋松鹤	林海燕2	林乐2
719	K06康复	2023-03-04	2023-06-17	3380081	任家祥	男	56Y	胸部脊髓功能损伤	截瘫;肋骨多处骨折;胸椎多处骨折;脊髓病性膀胱;神经源性肠;肩胛骨骨折;附睾炎;泌尿道感染;肝囊肿;颧弓骨折;后天性肾囊肿;下肢静脉血栓形成;多发性腰椎骨折;胸椎术后	好转	蒋松鹤	卢君艳	黄倩倩2
720	K06康复	2023-05-10	2023-06-18	3380584	王济林	男	60Y	颈部脊髓功能损伤C4	四肢瘫痪;胸腔积液;泌尿道感染;肋骨骨折;神经源性肠;颈椎椎管狭窄;受压区压疮;腰椎退行性病变;颈椎间盘突出;脊髓病性膀胱;下肢静脉肌间血栓形成;胸椎压缩性骨折;烧伤;涉及使用其他康复操作的医疗	好转	蒋松鹤	卢君艳	黄倩倩2
721	K06康复	2023-05-20	2023-06-19	3380795	季肖雄	男	57Y	颈部脊髓功能损伤C5	涉及使用其他康复操作的医疗;颅骨多发性骨折;胸椎椎弓骨折;四肢瘫痪;尘肺;下肢静脉肌间血栓形成;脊髓病性膀胱;颈椎间盘突出;神经源性肠;肺挫伤;肩胛骨骨折;肋骨骨折;泌尿道感染;肺部结节	好转	蒋松鹤	卢君艳	黄倩倩2
722	K06康复	2023-05-31	2023-06-27	3384628	林洪焕	男	74Y	颈部脊髓损伤	下肢动脉粥样硬化;静脉血栓形成;脊髓病性膀胱;颈椎间盘突出;腰椎滑脱;男性盆腔炎;神经源性肠;泌尿道感染;脂肪肝;胸腔积液;脊髓变性;脑萎缩;低钾血症;涉及使用其他康复操作的医疗;颈椎术后;颈椎骨折C4;四肢瘫痪	好转	蒋松鹤	卢君艳	程博
723	K06康复	2023-05-29	2023-06-28	3384906	陈荣华	男	54Y	颈部脊髓损伤	肾结石;颈椎术后;四肢瘫痪;脊髓病性膀胱;颈椎间盘突出;颈椎后纵韧带骨化;颈椎椎管狭窄;神经源性肠;眶骨骨折;鼻骨骨折;慢性骨髓炎;泌尿道感染;脂肪肝;下肢静脉血栓形成;涉及使用其他康复操作的医疗;后天性肾囊肿	好转	蒋松鹤	卢君艳	黄倩倩2
724	K06康复	2023-05-30	2023-07-02	3386595	陈满弟	女	69Y	颈部脊髓损伤	脂肪肝;骨质增生;泌尿道感染;2型糖尿病;肾盂积水;小腿血肿;脊髓病性膀胱;神经源性肠;颈椎术后;颈椎椎管狭窄;物理治疗;具有其他心脏瓣膜置换;四肢瘫痪;颈椎间盘突出;脊柱骨折;下肢静脉肌间血栓形成;下肢动脉粥样硬化;腰椎间盘突出;高血压	好转	蒋松鹤	卢君艳	黄倩倩2
725	K06康复	2023-06-05	2023-07-05	3387877	林海同	男	66Y	胸部脊髓损伤	胸椎骨折;骨折术后;物理治疗;脊髓病性膀胱;神经源性肠;肾结石;老年性脑萎缩;贫血;泌尿道感染;腰椎间盘突出;下肢静脉肌间血栓形成;胸腔积液;坠积性肺炎;腰椎骨折L2;截瘫;肋骨骨折	好转	蒋松鹤	卢君艳	程博
726	K06康复	2023-06-20	2023-07-05	3388110	赵罗球	男	63Y	膝关节僵硬	股骨粗隆间骨折;肾结石;创伤性脑损伤;硬脑膜下积液;枕骨骨折;物理治疗;胸腔积液;肺大疱;肺部感染;主动脉钙化;老年性脑萎缩;后天性肾囊肿;肝囊肿;高血压;慢性肾功能不全;下肢静脉血栓形成;痛风;贫血;创伤性蛛网膜下腔出血	好转	蒋松鹤	郑余银	高丽萍
727	K06康复	2023-06-11	2023-07-12	3391149	黄笑芬	女	64Y	踝关节僵硬	跟骨骨折;腓骨骨折;距骨脱位;肋骨多处骨折;骨折术后;下肢静脉血栓形成;糖尿病;物理治疗;骰骨骨折	好转	蒋松鹤	郑余银	邹恩苗
728	K06康复	2023-07-06	2023-07-16	3393045	郭增产	男	47Y	关节僵硬	骨盆骨折;髌骨骨折;膝关节脱位;膝关节积液;肌腱和肌肉损伤;坐骨神经损伤;肠系膜损伤;股骨外髁骨折;冠状动脉粥样硬化性心脏病;下肢动脉粥样硬化;下肢静脉血栓形成;髋臼骨折;高血压;物理治疗;骨折术后	好转	蒋松鹤	郑余银	邹恩苗
729	K06康复	2023-06-14	2023-07-23	3396287	滕云青	男	51Y	颈部脊髓损伤	脊髓病性膀胱;神经源性肠;四肢瘫痪;颈椎骨折;颈椎间盘突出;物理治疗;下肢静脉肌间血栓形成;体位性低血压;慢性胃炎;骨折术后;颈椎椎管狭窄;下肢动脉粥样硬化	好转	蒋松鹤	程博	黄倩倩2
730	K06康复	2023-06-25	2023-07-29	3398591	王济林	男	60Y	颈部脊髓损伤	脊髓病性膀胱;神经源性肠;颈椎椎管狭窄;颈椎间盘突出;肋骨骨折;腰椎退行性病变;物理治疗;胸腔积液;下肢深静脉血栓形成;受压区压疮;四肢瘫痪;泌尿道感染;胸椎压缩性骨折	好转	蒋松鹤	卢君艳	黄倩倩2
731	K06康复	2023-05-23	2023-07-31	3374806	夏松龄	女	78Y	胸部脊髓功能损伤T12	胸椎骨折T11/T12;腰椎骨折L1;高血压;系统性红斑狼疮;冠状动脉粥样硬化性心脏病;脊柱侧弯;泌尿道感染;下肢静脉肌间血栓形成;脊椎松解;物理治疗;腰骶椎间盘突出	好转	蒋松鹤	卢君艳	黄倩倩2	胸椎骨折球囊扩张成形术
732	K06康复	2023-07-25	2023-08-05	3402085	刘效林	男	34Y	关节僵硬	胫骨干骨折;骨折术后;多处挫伤;手术后状态，其他特指的;下肢静脉肌间血栓形成;物理治疗	好转	蒋松鹤	郑余银	邹恩苗
733	K06康复	2023-07-06	2023-08-06	3402572	蔡爱娥	女	67Y	肩关节痛	创伤性硬脑膜下积液;2型糖尿病性神经源性膀胱;高血压;下肢静脉肌间血栓形成;物理治疗;肩胛骨骨折;锁骨骨折;肋骨骨折;胸椎压缩性骨折;创伤性蛛网膜下腔出血;创伤性硬膜下出血;脑挫伤;皮下血肿;额骨骨折;眶骨骨折;颈椎间盘突出;肺挫伤	好转	蒋松鹤	林海燕2	林乐2
734	K06康复	2023-07-17	2023-08-12	3405264	黄笑芬	女	65Y	踝关节僵硬	肋骨多处骨折;骰骨骨折;距骨脱位;跟骨骨折;腓骨骨折;骨折术后;糖尿病;肌腱和肌肉损伤;下肢静脉肌间血栓形成	好转	蒋松鹤	郑余银	邹恩苗
735	K06康复	2023-07-19	2023-08-19	3408461	林海同	男	66Y	胸部脊髓损伤	截瘫;肋骨骨折;胸椎骨折T11/T12;下肢静脉肌间血栓形成;肾结石;腰椎间盘突出;老年性脑萎缩;贫血;泌尿道感染;脊髓病性膀胱;神经源性肠;涉及使用其他康复操作的医疗;骨折术后;腰椎骨折L1	好转	蒋松鹤	卢君艳	程博
736	K06康复	2023-07-23	2023-08-21	3409393	张海浦	男	44Y	胸部脊髓功能损伤T4/T5	肋骨多处骨折;胸腔闭式引流术后;股骨骨折;肩胛骨骨折;肾结石;骨折术后恢复期;截瘫;脊髓病性膀胱;神经源性肠;涉及使用其他康复操作的医疗;泌尿道感染;受压区压疮;低钠血症;下肢静脉血栓形成;胸椎骨折;胸椎滑脱	好转	蒋松鹤	林海燕2	林乐2
737	K06康复	2023-07-25	2023-08-22	3409601	叶晓飞	女	47Y	胸部脊髓功能损伤T8/T9	脂肪肝;肾结石;阴道炎;取除下腔静脉滤器;涉及使用其他康复操作的医疗;神经源性肠;骨折术后恢复期;胸椎骨折T11/T12;运动障碍;下肢深静脉血栓形成;脊髓病性膀胱;高血压;糖尿病;泌尿道感染;孤立性肺结节;胸腔积液	好转	蒋松鹤	卢君艳	程博	下肢静脉造影;下腔静脉滤器取出术
738	K06康复	2023-07-23	2023-08-23	3410087	孙权兵	男	48Y	髋关节痛	髂骨骨折;髋臼骨折;开放性足损伤;骶骨骨折;肾挫伤;胸腔积液;前列腺增生;下肢深静脉血栓形成;肝功能检查的异常结果;贫血;创伤后伤口感染;耻骨骨折;大腿开放性伤口;男性盆腔炎;前列腺结石;骨折术后恢复期;物理治疗	好转	蒋松鹤	郑余银	高丽萍
739	K06康复	2023-08-23	2023-08-31	3413553	詹秀娇	女	75Y	髋关节痛	骨折术后恢复期;白内障;心功能不全;睡眠障碍;脂肪肝;贫血;下肢深静脉血栓形成;股骨粗隆间骨折	好转	蒋松鹤	郑余银	邹恩苗
740	K06康复	2023-08-21	2023-09-05	3415571	张海浦	男	44Y	胸部脊髓功能损伤T4/T5	截瘫;肾结石;神经源性肠;涉及使用其他康复操作的医疗;泌尿道感染;受压区压疮;下肢静脉血栓形成;胸椎骨折;胸椎术后;胸椎滑脱;肋骨多处骨折;胸腔闭式引流术后;股骨骨折;肩胛骨骨折;脊髓病性膀胱	好转	蒋松鹤	林海燕2	林乐2
741	K06康复	2023-08-05	2023-09-05	3415785	林碎妹	女	54Y	多发性骨盆骨折	耻骨骨折;膝挫伤;肋骨骨折;寰椎骨折;颈部脊髓损伤;物理治疗;头皮血肿;局灶性大脑挫裂伤;盆腔积液;孤立性肺结节;下肢静脉肌间血栓形成;泌尿道感染;骶髂关节脱位;肩胛骨骨折;锁骨肩峰端骨折;髋臼骨折	好转	蒋松鹤	郑余银	邹恩苗
742	K06康复	2023-08-09	2023-09-07	3416743	黎永亮	男	49Y	肋骨骨折	原发性单侧膝关节病;感音神经性听觉丧失;肾上腺钙化;胆囊结石;前列腺钙化灶;物理治疗;下肢动脉粥样硬化;下肢静脉肌间血栓形成;胸腔积液;肺部感染;肺挫伤;肺栓塞	好转	蒋松鹤	林海燕2	林乐2	关节穿刺术;运动训练
743	K06康复	2023-09-20	2023-09-27	3424904	林碎妹	女	54Y	多发性骨盆骨折	骶髂关节脱位;耻骨骨折;髋臼骨折;肋骨骨折;寰椎骨折;颈部脊髓损伤;创伤后伤口感染;2型糖尿病;局灶性大脑挫裂伤;膝挫伤;盆腔积液;孤立性肺结节;下肢静脉肌间血栓形成;肩胛骨骨折;锁骨肩峰端骨折	好转	蒋松鹤	郑余银	邹恩苗
744	K06康复	2023-09-02	2023-09-30	3426417	林海同	男	66Y	胸部脊髓损伤	神经源性肠;物理治疗;截瘫;肋骨骨折;腰椎骨折;下肢静脉肌间血栓形成;肾结石;腰椎间盘突出;老年性脑萎缩;泌尿道感染;脊髓病性膀胱	好转	蒋松鹤	卢君艳	程博
745	K06康复	2023-09-30	2023-10-18	3432935	王爱玉	女	68Y	胸部脊髓损伤	截瘫;脊髓病性膀胱;肩胛骨骨折;肋骨多处骨折;耻骨骨折;胫腓骨干骨折;创伤性髂腰肌血肿;下肢静脉肌间血栓形成;胸腔闭式引流术后;胸腔积液;创伤性气胸;腔隙性脑梗死;心功能不全;受压区压疮;神经源性肠;物理治疗;骨折术后	好转	蒋松鹤	卢君艳	程博
746	K06康复	2023-09-15	2023-10-22	3434680	张文林	男	73Y	脑挫伤	腔隙性脑梗死;脑萎缩;全组鼻窦炎;2型糖尿病;高血压;孤立性肺结节;颈椎退行性病变;颈椎骨折;颈椎滑脱;腰椎退行性病变;膝关节退行性病变;下肢动脉粥样硬化;下肢静脉肌间血栓形成;头皮挫伤;眼睑挫伤;面部裂伤;头皮血肿;胸部损伤;肋骨骨折	好转	蒋松鹤	林海燕2	林乐2
747	K06康复	2023-10-08	2023-11-08	3442319	魏君印	男	66Y	脊髓损伤	创伤性截瘫;脊髓病性膀胱;神经源性肠;物理治疗;腰椎骨折;坐骨骨折;肋骨骨折;下肢静脉肌间血栓形成;胫骨平台骨折;股骨内髁骨折;半月板损伤;膝关节十字韧带损伤;膝关节退行性病变;消化道出血	好转	蒋松鹤	卢君艳	林心心
748	K06康复	2023-10-18	2023-11-21	3447815	李细香	女	54Y	胫骨平台伴腓骨骨折	足挫伤;拇趾骨折;腓肠神经损伤;肋骨骨折;腰椎间盘突出;后天性肾囊肿;肝回声不均;股神经损伤;闭孔神经损伤;下肢静脉肌间血栓形成;物理治疗;膝半月板撕裂;膝关节副韧带损伤;原发性单侧膝关节病;膝关节积液;滑膜增生;糖尿病	好转	蒋松鹤	郑余银	邹恩苗
749	K06康复	2023-10-25	2023-11-25	3448444	王爱玉	女	68Y	胸部脊髓损伤	运动障碍;物理治疗;骨折术后;下肢静脉肌间血栓形成;肩胛骨骨折;肋骨多处骨折;耻骨骨折;腔隙性脑梗死;半月板损伤;膝关节十字韧带损伤;膝的其他和未特指部位的扭伤和劳损	好转	蒋松鹤	卢君艳	程博
750	K06康复	2023-10-28	2023-11-27	3450483	郑燕娒	女	68Y	颈部脊髓损伤	创伤性截瘫;脊髓病性膀胱;颈椎脱位;颈椎术后;颈椎间盘突出;胸椎压缩性骨折;下肢静脉肌间血栓形成;体位性低血压;高血压;上呼吸道感染;物理治疗	好转	蒋松鹤	林心心	程博
751	K06康复	2023-10-30	2023-11-28	3451056	万凤迪	女	74Y	颈部脊髓损伤	后天性腰椎滑脱;腰椎间盘突出;脊椎退行性病变;胸腔积液;胸部挫伤;肋骨多处骨折;胆囊息肉;下肢静脉肌间血栓形成;下肢动脉粥样硬化;创伤性截瘫;物理治疗;颈椎术后;寰枢椎半脱位;胸椎压缩性骨折;胸椎骨折	好转	蒋松鹤	卢君艳	程博
752	K06康复	2023-10-31	2023-11-28	3451270	董俊印	男	63Y	膝关节僵硬	骨折术后;股骨干骨折;胫腓骨干骨折;股骨髁上骨折;高血压;下肢静脉肌间血栓形成;肝囊肿;前列腺增生	好转	蒋松鹤	林海燕2	林乐2
753	K06康复	2023-10-30	2023-11-29	3451514	李爱国	男	54Y	髋关节痛	骨折术后;物理治疗;寰枢椎半脱位;胸椎压缩性骨折;颧弓骨折;腰椎骨折;肋骨多处骨折;眶骨骨折;高脂血症;创伤性湿肺;胸腔积液;脂肪肝;颈椎退行性病变;颈椎间盘突出;颈椎椎管狭窄;牙周脓肿;下肢静脉肌间血栓形成;2型糖尿病	好转	蒋松鹤	郑余银	高丽萍
754	K06康复	2023-12-02	2023-12-11	3456534	郑燕娒	女	69Y	颈部脊髓损伤	创伤性截瘫;颈椎脱位C5/C6;颈椎间盘突出;胸椎压缩性骨折;胸椎退行性病变;下肢静脉肌间血栓形成;体位性低血压;高血压;泌尿道感染	好转	蒋松鹤	卢君艳	林心心
755	K06康复	2023-11-15	2023-12-13	3457812	魏君印	男	66Y	脊髓损伤	创伤性截瘫;脊髓病性膀胱;神经源性肠;物理治疗;骨折术后;腰椎骨折;坐骨骨折;肋骨骨折;下肢静脉肌间血栓形成;胫骨平台骨折;股骨骨折;膝内侧半月板损伤;膝外侧半月板损伤;膝关节退行性病变	好转	蒋松鹤	卢君艳	林心心
756	K06康复	2023-08-14	2023-12-14	3458032	王小罗	男	66Y	肿瘤性病理性骨折	股骨继发恶性肿瘤;肺继发恶性肿瘤;肾恶性肿瘤;直肠恶性肿瘤个人史;下肢静脉肌间血栓形成;高尿酸血症	好转	屠文展	屠文展	陈文斯	股骨骨折闭合复位髓内针内固定术
757	K06康复	2023-11-28	2023-12-16	3458792	林丙忠	男	71Y	髋关节痛	物理治疗;髂骨骨折;髋臼骨折;耻骨骨折;下肢静脉肌间血栓形成;膝关节前十字韧带损伤;膝关节内侧副韧带损伤;腓骨骨折;髌骨骨折;半月板损伤;膝关节外侧副韧带损伤;膝关节积液;胸腔积液;头皮血肿;肌腱和肌肉损伤;低蛋白血症;贫血;肝损伤;腹腔积液;胆汁淤积症;肾损伤;脂肪肝	好转	蒋松鹤	郑余银	邹恩苗
758	K06康复	2023-11-21	2023-12-20	3460824	王芊芊	女	43Y	关节僵硬	骨折术后;髋关节脱位;髋臼骨折;股骨远端骨折;胫腓骨干骨折;寰椎骨折;胸椎棘突骨折;创伤性硬脑膜下血肿;头皮血肿;腹壁挫伤;下肢静脉肌间血栓形成;物理治疗	好转	蒋松鹤	林海燕2	林乐2
759	K06康复	2023-11-24	2023-12-23	3461821	王哲领	男	47Y	膝关节前十字韧带损伤	膝关节僵硬;股骨内髁骨折;膝内侧半月板撕裂;膝关节内侧副韧带损伤;头皮裂伤;肝脂肪瘤;脂肪肝;肺诊断性影像异常;前列腺钙化灶;髌股关节病;下肢静脉肌间血栓形成	好转	蒋松鹤	郑余银	高丽萍	膝关节前交叉韧带重建术
760	K06康复	2023-11-25	2023-12-24	3462169	叶爱梅	女	52Y	脊髓损伤	创伤性截瘫;神经源性肠;脊髓病性膀胱;物理治疗;脊柱骨折;骨盆骨折;股骨骨折;骶髂关节脱位;肋骨骨折;骶尾部挫伤;腰椎间盘突出;胸腔积液;心包积液;后天性肾囊肿;泌尿道感染;下肢静脉肌间血栓形成;骨折术后	好转	蒋松鹤	卢君艳	林心心
761	K06康复	2023-12-03	2023-12-27	3463610	李爱国	男	54Y	髋关节痛	骨折术后恢复期;寰枢椎半脱位;胸椎压缩性骨折;颧弓骨折;腰椎骨折;肋骨多处骨折;高血压;2型糖尿病;高脂血症;创伤性湿肺;胸腔积液;脂肪肝;颈椎退行性病变;颈椎间盘突出;下肢静脉肌间血栓形成;肩周炎;物理治疗	好转	蒋松鹤	郑余银	邹恩苗
762	K06康复	2023-12-03	2023-12-31	3465314	陈小云	女	61Y	膝关节创伤性关节病	膝关节僵硬;胫骨平台骨折;骨质疏松;乙型病毒性肝炎;高血压;下肢静脉肌间血栓形成;物理治疗	好转	蒋松鹤	郑余银	邹恩苗
763	N13CCU	2023-08-15	2023-09-09	3417296	徐美妹	女	76Y	心室颤动	后天性肾囊肿;肋骨多处骨折;Ⅲ度房室传导阻滞;心房颤动;左束支传导阻滞;房间隔缺损;三尖瓣疾病,其他的;肺动脉高压;心功能不全;肺部感染;下肢动脉粥样硬化;下肢静脉血栓形成;肺大疱	治愈	张素勤	吴海亚	吴海亚	永久起搏器置入术;暂时性经静脉起搏器系统的置入;单根导管的冠状动脉造影术
764	N15心血管内科	2023-05-14	2023-05-18	3368112	李柳妹	女	81Y	冠状动脉粥样硬化性心脏病	肱骨上端骨折;颈动脉硬化;下肢动脉粥样硬化;多发性脑梗死;老年性脑萎缩;2型糖尿病;肩关节脱位;肱骨头骨折;肝囊肿;脂肪肝;下肢静脉血栓形成;高血压性心脏病	好转	曾刚焕	张新民	叶盛
765	N15心血管内科	2023-06-26	2023-06-28	3385133	王松土	男	82Y	二尖瓣反流	前列腺囊肿;前列腺结石;前列腺增生;肺部感染;肺气肿;下肢静脉血栓形成;高脂血症;主动脉（瓣）关闭不全;肋骨多处骨折;颈动脉硬化;锁骨下动脉粥样硬化;下肢动脉粥样硬化;肺动脉高压;高血压;支气管扩张（症）;心功能Ⅳ级;退行性主动脉瓣疾患	好转	林丛	潘嘉林	陈晔
766	N15心血管内科	2023-06-20	2023-07-04	3387261	唐美英	女	77Y	急性冠脉综合征	骨质疏松，其他的;头皮裂伤;冠状动脉粥样硬化性心脏病;心功能Ⅲ级;肺部感染;胸腔积液;下肢动脉粥样硬化;下肢静脉血栓形成;肱骨骨折;肱骨髁间骨折;桡骨骨折;小腿开放性伤口;开放性前臂损伤;腰椎骨折L1;肋骨多处骨折;耻骨骨折	好转	林丛	潘嘉林	陈晔
767	N16心血管内科	2023-07-17	2023-08-07	3402851	陈碎兰	女	88Y	心室过早除极	肺大疱;下肢动脉粥样硬化;下肢静脉血栓形成;梅毒;心功能Ⅲ级;股骨颈骨折;冠状动脉粥样硬化性心脏病;心房颤动;肺部感染;特发性(原发性)高血压;2型糖尿病;后天性肾囊肿;肺的其他疾患	好转	王艳	李进	郑程	多根导管冠状动脉造影;心电生理检查;右心导管置入;经导管心脏射频消融术;人工股骨头置换术
768	N16心血管内科	2023-08-01	2023-08-08	3403297	汤正华	男	87Y	不稳定型心绞痛	冠状动脉粥样硬化性心脏病;特发性(原发性)高血压;老年性心脏瓣膜病;主动脉(瓣)关闭不全;二尖瓣反流;颈动脉硬化;下肢动脉粥样硬化;下肢动脉血栓形成;陈旧性股骨颈骨折;陈旧性肺结核	好转	李岳春	潘样岐	潘样岐	冠状动脉血管内超声(IVUS);多根导管冠状动脉造影;冠状动脉成形术
769	N16心血管内科	2023-10-14	2023-10-30	3438365	徐兰英	女	75Y	病态窦房结综合征	特发性(原发性)高血压;脓毒血症;脑梗死;颈动脉硬化;慢性乙型病毒性肝炎;高同型半胱氨酸血症;单纯性肾囊肿;肾结石;冠状动脉粥样硬化性心脏病;胸椎骨折;下肢静脉血栓形成	好转	季亢挺	季亢挺	殷日鹏	右心导管置入;心电生理检查;永久起搏器置入术
770	N16心血管内科	2023-12-09	2023-12-20	3460642	翁柳玉	女	75Y	心房颤动	心室过早除极;脑梗死;特发性(原发性)高血压;2型糖尿病;脂肪肝;后天性肾囊肿;陈旧性肋骨骨折;锁骨下动脉粥样硬化;下肢动脉粥样硬化;下肢静脉血栓形成	好转	李岳春	宋静	宋静	经导管心脏射频消融改良迷宫术;经皮左心耳封堵术;侵入性电生理测定导管术;用对比剂其他特指部位的静脉造影术;心脏标测图;左心导管置入;房间隔穿刺术
771	N17心血管内科	2023-03-11	2023-03-13	3341825	徐丽芬	女	84Y	急性冠脉综合征	陈旧性耻骨骨折;后天性肾囊肿;慢性肾衰竭;下腔静脉血栓形成;皮肤和皮下组织局部感染;高血压病;脓毒血症;泌尿道感染;食管裂孔疝;肺部感染;哮喘;痛风	好转	李嘉	金戈	218336
首页	尾页
骨折+肺栓塞
序号	出院科室	入院日期	出院日期	病案号	病人	性别	年龄	主诊断	非主诊断	转归	主任	主治	住院	手术
					姓名					情况	医师	医师	医师	名称
1	C05疼痛科	2023-09-23	2023-12-04	3453755	林志翔	男	67Y	放射治疗疗程	为肿瘤化学治疗疗程;食管恶性肿瘤;肺栓塞;静脉血栓形成;粒细胞缺乏;肺部感染;后天性肾囊肿;肝囊肿;陈旧性肋骨骨折;腰椎间盘突出	好转	吴剑	吴剑	周盈盈2	静脉注射化疗药物;静脉注射化疗药物;静脉注射化疗药物;静脉注射化疗药物;静脉注射化疗药物;静脉注射化疗药物
2	C05疼痛科	2023-12-13	2023-12-21	3461263	林志翔	男	68Y	为肿瘤化学治疗疗程	食管恶性肿瘤;软组织感染;肺栓塞;肺部感染;后天性肾囊肿;肝囊肿;肋骨骨折;腰椎间盘突出	好转	吴剑	吴剑	周盈盈2	静脉注射化疗药物
3	C06肿瘤放化疗、神经康复	2023-08-22	2023-10-09	3428945	蒋洪福	男	83Y	肺恶性肿瘤	病理性骨折，不可归类在他处者;胸腔积液;下肢动脉粥样硬化;腹主动脉粥样硬化;呼吸衰竭;骨继发恶性肿瘤;阻塞性肺炎;心房颤动;颈动脉硬化;淋巴结继发恶性肿瘤;肺栓塞	未愈	陈文俊	朱宝玲	周盈盈2	内镜下鼻腔粘连松解术
4	D06(ICU)	2023-07-03	2023-07-22	3395795	何升光	男	59Y	急性肺栓塞	截断术残端的坏死;多脏器损伤;呼吸心跳骤停;腘动脉栓塞;心脏停搏复苏成功;截断术残端的感染;肋骨骨折;腘动脉损伤;腓总神经损伤;腘窝开放性损伤;头皮血肿;开放性损伤伴感染;特发性（原发性）高血压;股骨髁骨折;股四头肌肌肉损伤;失血性休克	未愈	程碧环	戴凌燕	戴凌燕	残端皮肤修整术;腿筋膜松解术;腘动脉缝合术;大腿截断术;其他下肢关节囊或韧带缝合术;股四头肌缝合术;创面封闭式负压引流术（VSD）;皮肤和皮下坏死组织切除清创术;肌腱、血管、神经探查术;连续性肾脏替代治疗[CRRT];呼吸机治疗[小于96小时]
5	D11(创伤3)	2023-03-04	2023-03-07	3339362	章文高	男	84Y	创伤性休克	急性肺栓塞;慢性阻塞性肺病;肩胛骨骨折;锁骨骨折;胸腔积液	未愈	洪建军	余洋	郑亦静
6	D15颈椎外科、腰椎外科	2023-02-26	2023-03-04	3337694	李岩新	男	89Y	骨质疏松伴病理性骨折	后天性肾囊肿;肺萎陷;肝内胆管结石;高血压病;腰椎骨折;脊椎前移;肺气肿;肺栓塞	好转	林焱	田乃锋	田乃锋	腰椎骨折球囊扩张成形术
7	F02急诊创伤	2023-07-08	2023-08-09	3403964	黎永亮	男	49Y	开放性肺破裂	前列腺钙化灶;肺栓塞;下肢静脉血栓形成;肺部感染;四根以上肋骨骨折不伴第一肋骨骨折;胸骨骨折;肾上腺钙化;多处挫伤;创伤性皮下气肿	好转	林露阳	林露阳	项洪武	股静脉穿刺术;下腔静脉滤器取出术;肾静脉造影;下肢静脉滤器置入术
8	F06(急ICU)	2023-06-04	2023-06-06	3375735	陈玉花	女	74Y	创伤性蛛网膜下腔出血	肺部感染;肺栓塞;低蛋白血症;多处损伤;掌骨多处骨折;尺骨桡骨闭合性骨折;开放性脑挫伤;肋骨骨折;呼吸衰竭;休克	未愈	孔万权	孔万权	张烁	静脉穿刺术
9	F06(急ICU)	2023-05-20	2023-06-21	3382060	吴向清	男	72Y	脾破裂	多处开放性伤口;创伤性湿肺;肌腱和肌肉损伤;创伤性脑损伤;失血性休克;肋骨多处骨折;急性肺栓塞;高血压;下肢深静脉栓塞;2型糖尿病性肾病;创伤性蛛网膜下腔出血;外踝骨折;耻骨骨折;肺部感染;硬脑膜下积液;髋臼骨折	治愈	孙来芳	孔万权	张烁	腹腔冲洗检查;全脾切除术;下腔静脉滤器置入术;肾静脉造影
10	H14呼吸内科	2023-01-05	2023-01-27	3324688	戚彩平	女	64Y	肺栓塞	颈椎椎管狭窄;颈椎间盘突出;肩袖损伤;腓骨骨折;脂肪肝;肝囊肿;肾结石;肺结节	治愈	何剑波	章国棉	章国棉
11	H14呼吸内科	2023-01-28	2023-02-12	3329912	麻永宣	男	66Y	肺栓塞	双踝骨折;踝关节脱位;后天性肾囊肿;高血压病;肾结石;肺部感染;鼻骨骨折;肋骨骨折	好转	何剑波	何剑波	章国棉
12	H14呼吸内科	2023-04-06	2023-04-29	3360271	胡里士	男	66Y	肺挫伤	颧弓骨折;前列腺钙化灶;创伤性胸腔积液;多发性肋骨骨折;肩胛骨骨折;眶骨骨折;额骨骨折;前列腺增生;肝囊肿;肺栓塞	好转	林洁2	金芬华	218279
13	H14呼吸内科	2023-09-27	2023-10-14	3431344	高芳柳	女	78Y	肺栓塞	主动脉钙化;肝内胆管结石;肾结石;后天性肾囊肿;肋骨骨折;腰椎间盘突出;下肢静脉肌间血栓形成;下肢动脉粥样硬化;结肠黑变病;腰椎术后;骨质疏松;甲状腺钙化;轻度肺动脉高压;间质性肺病;高血压性肾衰竭;乳房纤维囊性乳腺病;冠状动脉粥样硬化	好转	徐慧	邱章伟	219087
14	K02康复	2023-01-03	2023-01-04	3315494	戚彩平	女	66Y	肺栓塞	肾结石;肝囊肿;呼吸困难;颈椎椎管狭窄;颈椎间盘突出;涉及使用特指康复操作医疗;颈椎后纵韧带骨化;肩撞击综合征;肩袖损伤;胫骨下端骨折;脂肪肝	未愈	蒋松鹤	卢君艳	218289
15	K02康复	2023-08-21	2023-09-14	3419598	何有正	男	54Y	胸部脊髓损伤	肺部感染;泌尿道感染;脊髓病性膀胱;肺栓塞;肿瘤性病理性骨折;前列腺钙化灶;物理治疗;前列腺结石;截瘫;左肺上叶恶性肿瘤;胸椎继发恶性肿瘤;胸椎术后;前列腺增生;贫血;神经源性肠	好转	蒋松鹤	卢君艳	程博
16	K06康复	2023-08-09	2023-09-07	3416743	黎永亮	男	49Y	肋骨骨折	原发性单侧膝关节病;感音神经性听觉丧失;肾上腺钙化;胆囊结石;前列腺钙化灶;物理治疗;下肢动脉粥样硬化;下肢静脉肌间血栓形成;胸腔积液;肺部感染;肺挫伤;肺栓塞	好转	蒋松鹤	林海燕2	林乐2	关节穿刺术;运动训练
首页	尾页
