# Supplementary material for: Variable Rate of D-dimer Predicts Venous Thromboembolism in Postoperative Fracture Patients: A Single-Center Retrospective Cohort Study
Source: Research Square preprint supplement (doi:10.21203/rs.3.rs-7878480/v1), 2025-12-09
Supplement: Supplementary file 2 [file 1669e49f78fad702265aa561.xlsx]

## Sheet: Sheet1
骨折+血栓
序号	出院科室	入院日期	出院日期	病案号	病人	性别	年龄	主诊断	非主诊断	转归	主任	主治	住院	手术
					姓名					情况	医师	医师	医师	名称
1	C03眼科口腔	2025-05-23	2025-06-03	3653711	周伍妹	女	72Y	股骨颈骨折	骨质疏松;高血压;慢性胃炎;脂肪肝;后天性肾囊肿;室间隔肥大;二尖瓣及主动脉瓣关闭不全;下肢静脉血栓形成	好转	黄俊武	罗鹏	罗鹏	人工股骨头置换术;筋膜成形术
2	C03眼科口腔	2025-06-01	2025-06-08	3655963	张华志	男	73Y	股骨颈骨折	髋关节退行性病变;强直性脊柱炎;主动脉瓣关闭不全;肝回声不均;下肢动脉粥样硬化;下肢静脉血栓形成;骶髂关节炎，不可归类在他处者;老年性脑萎缩	治愈	水小龙	水小龙	汪吉棋	人工双动股骨头置换术;髋关节滑膜切除术;髋轴面，陶瓷与聚乙烯
3	C09全科医学科	2025-04-21	2025-04-27	3635885	王微妹	女	60Y	恶性腹水	甲状腺结节;肺大疱;支气管扩张(症);乳房恶性肿瘤个人史;肝囊肿;胆囊息肉;下肢静脉血栓形成;特发性(原发性)高血压;肋骨骨折	治愈	王志翊	齐艳红	王鹏	胸腔穿刺抽液术
4	C09全科医学科	2025-06-02	2025-06-12	3658343	林婉华	女	88Y	肾恶性肿瘤	低血糖昏迷性脑病;肺部感染;2型糖尿病;特发性(原发性)高血压;高血压性心脏病;下肢静脉血栓形成;轻度贫血;低蛋白血症;后天性肾囊肿;下肢动脉粥样硬化;腰椎间盘突出;腰椎骨折;颈动脉硬化;输卵管继发恶性肿瘤;膀胱继发恶性肿瘤;骨继发恶性肿瘤;淋巴结继发恶性肿瘤	死亡	陈莹	夏轶姿	潘贤娟
5	C11肾内科	2025-01-11	2025-01-30	3599242	郑水珠	女	85Y	急性肾功能不全	肺部感染;肺的其他疾患;肺肿物;胸腔积液;肺气肿;高血压性视网膜病变;房性期前收缩[房性早搏];颈内动脉狭窄;主动脉钙化;冠状动脉粥样硬化;下肢动脉粥样硬化;下肢静脉血栓形成;多发性脑梗死;肝囊肿;腰椎骨折;胸椎骨折;具有心脏和血管植入物和移植物	好转	李占园	徐晓燕2	黄文文
6	C11肾内科	2025-02-17	2025-05-01	3637968	郑水珠	女	85Y	慢性肾脏病5期	心功能不全;肺部感染;血液透析;消化道出血;肝功能不全;高血压性心脏病;阵发性心房颤动;肺气肿;颈内动脉狭窄;血管支架植入术后状态;下肢动脉粥样硬化;下肢静脉血栓形成;多发性脑梗死;肝囊肿;后天性肾囊肿;腰椎骨折;胸椎骨折;骨缺血性坏死	好转	李占园	徐晓燕2	黄文文	血液透析;为肾透析的临时静脉插管术;为肾透析的临时静脉导管拔管;为肾透析半永久静脉插管术;股静脉穿刺置管术;连续性肾脏替代治疗[CRRT];胸腔闭式引流术;胸腔闭式引流术
7	C11肾内科	2025-05-27	2025-06-08	3655766	郑大英	女	63Y	循环系统的其他操作后疾患，不可归类在他处者	慢性肾脏病5期贫血;血液透析;髂外静脉血栓形成;下肢软组织感染;急性上呼吸道感染;2型糖尿病肾病V期;高血压;甲状腺功能减退症;为肾透析的动静脉造瘘;骨折术后;老年性心脏瓣膜病;心房扩大;二尖瓣反流;三尖瓣疾病,其他的;肺动脉高压中度;后天性肾囊肿;无症状性菌尿	治愈	陈辉乐	陈辉乐	陈瑶慧	上肢静脉球囊扩张成形术;为肾透析的半永久静脉导管拔管;上肢静脉造影;上肢静脉导管溶栓;血液透析
8	D06(ICU)	2025-02-06	2025-02-27	3610523	郑和月	女	67Y	股骨颈骨折	多发性脑梗死;老年性脑萎缩;慢性肾衰竭尿毒症期;间质性肺炎;肺部感染;特发性(原发性)高血压;2型糖尿病;中度贫血;肋骨骨折;主动脉钙化;腰椎间盘突出伴神经根病;胸椎退行性病变;腰椎退行性病变;后天性肾囊肿;胆囊息肉;下肢动脉粥样硬化;下肢静脉肌间血栓形成;鼻窦炎;血液透析	好转	陈如杰	傅蓓蓓	傅蓓蓓	人工股骨头置换术;髋轴面，陶瓷与金属;关节滑膜切除术;血液透析;运动训练
9	D06(ICU)	2025-03-14	2025-03-21	3619696	黄忠存	男	67Y	创伤性湿肺	肋骨骨折;胸腔积液;胸椎压缩性骨折;腰椎骨折;颈椎退行性病变;腰部挫伤;肾超声检查异常;二尖瓣后叶脱垂;下肢深静脉血栓形成;皮下血肿;丘脑梗死;二尖瓣反流;下肢静脉肌间血栓形成	好转	程碧环	陈如杰	陈如杰
10	D07儿童骨科、骨盆外科	2025-01-18	2025-01-23	3595911	董定荣	男	92Y	股骨颈基底骨折	肝功能不全;老年性心脏瓣膜病;前列腺增生;前列腺结石;肺肿物;下肢静脉血栓形成	治愈	水小龙	水小龙	陈春慧	人工股骨头置换术;髋关节滑膜切除术;髋轴面，金属与聚乙烯
11	D07儿童骨科、骨盆外科	2025-03-22	2025-03-29	3623105	王婉华	女	66Y	桡骨远端骨折	尺骨茎突骨折;下肢静脉肌间血栓形成	好转	翁益民	翁益民	蔡乐益	桡骨骨折切开复位钢板内固定术;桡骨植骨术;关节软骨修复术
12	D13呼吸内科一	2024-12-13	2025-01-07	3588955	吴子刚	男	78Y	慢性阻塞性肺病伴有急性下呼吸道感染	脑挫伤;下肢静脉血栓形成;老年性脑萎缩;眶骨骨折;鼻骨骨折;多处挫伤;非创伤性肩袖撕裂;高血压;颈椎退行性病变;颈椎间盘突出;后天性肾囊肿	好转	翁海霞	翁海霞	章国棉
13	F02急诊创伤	2025-01-19	2025-02-03	3601006	金春彩	男	73Y	基底节出血	肺部感染;颈椎退行性病变;高血压;下肢静脉肌间血栓形成;颈椎间盘突出;陈旧性肋骨骨折	好转	林露阳	林露阳	项洪武
14	F02急诊创伤	2025-03-20	2025-04-03	3625521	胡庆兵	男	55Y	头皮血肿	多处挫伤;肋骨骨折;下肢深静脉血栓形成;后天性肾囊肿;下肢动脉粥样硬化;阑尾术后	治愈	林露阳	林露阳	项洪武
15	F02急诊创伤	2025-04-07	2025-04-23	3634020	蔡辉	男	85Y	肋骨骨折	胸椎横突骨折;下肢静脉肌间血栓形成;胸腔积液;硬脑膜下积液;头部的损伤;高血压;后天性肾囊肿;前列腺增生;胸椎退行性病变;腰椎退行性病变	好转	林露阳	林露阳	项洪武
16	F02急诊创伤	2025-03-26	2025-04-24	3634721	陈久烈	男	86Y	脑震荡	头皮裂伤;头皮血肿;腓骨骨折;胫骨骨折;外踝骨折;骰骨骨折;下肢静脉肌间血栓形成;手部损伤;高血压;肾结石	治愈	林露阳	项洪武	项洪武	带蒂皮瓣移植术;游离皮肤移植
17	F02急诊创伤	2025-04-29	2025-05-15	3644593	夏制青	男	77Y	肋骨骨折	创伤性胸腔积液;肺挫伤;胸椎横突骨折;腰椎骨折;颈椎横突骨折;胸椎退行性病变;腰椎退行性病变;腰骶椎间盘突出;下肢静脉血栓形成;气胸;创伤性皮下气肿;前列腺增生;前列腺钙化灶;主动脉瓣钙化;创伤性湿肺;腔隙性脑梗死;脱髓鞘性白质脑病;老年性脑萎缩	好转	林露阳	林露阳	项洪武	胸腔闭式引流术
18	F03观察病房	2025-01-20	2025-01-26	3596789	池松花	女	85Y	后循环缺血	2型糖尿病;高血压性心脏病;低钠血症;颈动脉硬化;锁骨下动脉粥样硬化;下肢静脉血栓形成;脂肪肝;胆囊结石;后天性肾囊肿;肾结石;孤立性肺结节;骨折术后	好转	陈莹	夏轶姿	潘贤娟
19	F04脑外	2024-12-24	2025-01-07	3589181	叶多弟	女	73Y	颈动脉闭塞脑梗死	多发性脑梗死;肺部感染;下肢动脉粥样硬化;下肢静脉肌间血栓形成;肋骨多处骨折;肺诊断性影像异常;胸腔积液	好转	尹波	李丹东	方均浩	脑动脉造影术;气管内插管;呼吸机治疗[小于96小时]
20	F04脑外	2024-12-01	2025-01-25	3596225	徐玉琴	女	57Y	颅骨缺损修补	手术后恢复期;脑挫伤;硬脑膜下积液;颅底骨骨折;创伤性硬脑膜下血肿;创伤性硬脑膜外血肿;创伤性颅内积气;主动脉瓣关闭不全;营养不良;高血压;2型糖尿病;下肢静脉血栓形成;脂肪肝;肾错构瘤	其他	尹波	李丹东	王祥	颅骨修补术
21	F05脑外	2024-12-13	2025-01-29	3598753	吴金波	男	67Y	局灶性大脑挫伤伴血肿	创伤性硬膜下出血;颞骨骨折;锁骨骨折;肋骨多处骨折;枢椎齿状突骨折;下肢静脉肌间血栓形成	好转	张弩	张弩	张弩	脑内血肿清除术
22	F06(急ICU)	2025-03-29	2025-04-13	3629613	郑东兰	女	79Y	脑梗死	肋骨骨折;肺部感染;肺不张;胸腔积液;急性呼吸衰竭;高血压;2型糖尿病;下肢静脉血栓形成;动脉粥样硬化;脂肪肝;后天性肾囊肿	好转	胡雪珍	胡雪珍	胡雪珍	气管内插管;电子支气管镜检查;呼吸机治疗[大于等于96小时]
23	F06(急ICU)	2025-04-13	2025-04-21	3633318	汪秀林	女	56Y	颅内损伤	创伤性蛛网膜下腔出血;脑挫伤;多处开放性伤口;骨盆骨折;创伤性脑梗塞;脑疝;创伤性气胸;肺部感染;头皮挫伤;软组织感染;肋骨骨折;肩胛骨骨折;胫骨骨折;腓骨骨折;下肢深静脉血栓形成;急性失血性贫血;低蛋白血症;颈椎退行性病变;肾结石;胸椎横突骨折;腰椎骨折	未愈	孙来芳	孙来芳	张烁	气管内插管;呼吸机治疗[大于等于96小时];锁骨下静脉穿刺中心静脉置管术
24	G04(神内+老年)	2025-01-23	2025-01-28	3597851	苏玉花	女	89Y	脑梗死	颈动脉狭窄;陈旧性脑出血;心房颤动;室性期前收缩;特发性(原发性)高血压;椎动脉狭窄;颈动脉硬化;下肢静脉肌间血栓形成;低钾血症;肾盂积水，其他的;股骨骨折;下肢动脉粥样硬化;锁骨下动脉粥样硬化;Ⅱ度房室传导阻滞	好转	林燕	孙晶	孙晶
25	G04(神内+老年)	2025-01-11	2025-02-01	3599674	陈宝丹	女	84Y	基底节脑梗死	特发性(原发性)高血压;静脉血栓形成;三叉神经痛;泌尿道感染;颈动脉硬化;脂肪肝;肋骨骨折;胸腔积液	好转	李勇	李勇	李勇
26	G04(神内+老年)	2025-02-04	2025-02-10	3604867	叶秀眉	女	76Y	大脑动脉血栓形成引起的脑梗死	高血压;糖耐量受损;颈动脉硬化;下肢动脉粥样硬化;肺肿物;脂肪肝;锁骨下动脉斑块;骨折术后	好转	郑国庆	金露	金露
27	G04(神内+老年)	2025-02-02	2025-02-18	3606378	邱永娒	男	76Y	大脑动脉血栓形成引起的脑梗死	2型糖尿病;颈内动脉粥样硬化;肾盂扩张;下肢动脉硬化闭塞症;局限性淋巴结增大;肺肿物;肾结石伴有输尿管结石;前列腺增生;后天性肾囊肿;陈旧性肋骨骨折;眼术后;前列腺结石;输尿管扩张	好转	郑国庆	金露	金露
28	G04(神内+老年)	2025-04-27	2025-05-11	3642113	李德荣	男	66Y	大脑动脉栓塞引起的脑梗死	心房颤动;大脑中动脉狭窄;下肢静脉肌间血栓形成;肺部感染;肋骨骨折;下肢动脉粥样硬化	好转	郑国庆	金露	金露
29	G04(神内+老年)	2025-04-28	2025-05-11	3642132	吴凤英	女	68Y	大脑动脉闭塞脑梗死	高血压;2型糖尿病;甲状腺功能减退症;颈动脉硬化;足骨折;脂肪肝;下肢动脉狭窄;下肢动脉硬化闭塞症;下肢静脉肌间血栓形成	好转	邬伟	金露	邬伟
30	G04(神内+老年)	2025-06-22	2025-06-28	3664839	徐顺旺	男	74Y	多发性脑梗死	高脂血症;颈动脉闭塞;颈动脉狭窄;颈内动脉瘤;下肢静脉肌间血栓形成;下肢动脉粥样硬化;三根肋骨骨折不伴第一肋骨骨折;颈椎间盘突出;肺肿物;胆囊胆固醇沉着症;前列腺增生;后天性肾囊肿	好转	柯将琼	柯将琼	柯将琼
31	G04(神内+老年)	2025-06-21	2025-06-28	3664946	毛秀文	女	76Y	前庭性眩晕	腔隙性脑梗死;特发性(原发性)高血压;2型糖尿病;泌尿道感染;肩胛骨喙突骨折;下肢静脉肌间血栓形成;房性期前收缩[房性早搏];轻度认知障碍;脾囊肿;后天性肾囊肿;下肢动脉粥样硬化;颈椎间盘突出;阵发性心房颤动	好转	郑国庆	金露	金露
32	H08综合外科/心胸外科	2025-04-07	2025-04-15	3630620	林青生	男	67Y	肠梗阻，其他和未特指的	手术后恶性肿瘤化学治疗;直肠恶性肿瘤;全身性广泛继发恶性肿瘤;结肠造口状态;下肢静脉血栓形成;股骨头缺血性坏死;后天性肾囊肿;肺大疱;骨折术后;盆腔肿物	治愈	倪仲琳	倪仲琳	徐训政	静脉注射化疗药物
33	H08综合外科/心胸外科	2025-05-14	2025-05-18	3645689	林青生	男	67Y	手术后恶性肿瘤化学治疗	直肠恶性肿瘤;全身性广泛继发恶性肿瘤;静脉血栓形成;后天性肾囊肿;股骨头缺血性坏死;肺大疱;结肠造口状态;骨折术后	好转	倪仲琳	倪仲琳	徐训政	静脉注射化疗药物
34	H08综合外科/心胸外科	2025-06-03	2025-06-07	3655383	林青生	男	67Y	手术后恶性肿瘤化学治疗	直肠恶性肿瘤;全身性广泛继发恶性肿瘤;静脉血栓形成;股骨头缺血性坏死;后天性肾囊肿;肺大疱;股骨骨折;结肠造口状态	好转	倪仲琳	倪仲琳	徐训政	静脉注射化疗药物
35	H08综合外科/心胸外科	2025-06-22	2025-06-26	3664278	林青生	男	67Y	手术后恶性肿瘤化学治疗	直肠恶性肿瘤;腹腔内和盆腔的肿胀、肿物和肿块;静脉血栓形成;股骨头缺血性坏死;后天性肾囊肿;肺大疱;骨折术后	好转	倪仲琳	倪仲琳	徐训政	静脉注射化疗药物
36	H10心血管内科	2025-01-02	2025-01-18	3593680	林玉莲	女	81Y	冠状动脉粥样硬化性心脏病	心功能Ⅲ级;左心室室壁瘤;肺部感染;脑梗死;高血压;2型糖尿病;后天性肾囊肿;脂肪肝;低蛋白血症;颈动脉硬化;陈旧性肋骨骨折;下肢静脉肌间血栓形成	好转	黄明远	黄明远	王存存	多根导管冠状动脉造影
37	H10心血管内科	2025-01-29	2025-02-18	3599202	李阿翠	女	86Y	股骨颈骨折	肺部感染;老年性心脏瓣膜病;二尖瓣反流;主动脉(瓣)关闭不全;心房颤动;肺动脉高压;胸腔积液;下肢静脉肌间血栓形成;脊柱侧弯;低色素性贫血;慢性乙型病毒性肝炎;单纯性肾囊肿;肾结石	治愈	李嘉	李嘉	李嘉	人工股骨头置换术;髋轴面，陶瓷与金属
38	H10心血管内科	2025-02-03	2025-03-05	3612622	郑听妹	女	87Y	急性非ST段抬高型心肌梗死	冠状动脉粥样硬化性心脏病;KillipII级;特发性(原发性)高血压;下肢静脉肌间血栓形成;闭塞性周围动脉粥样硬化;肺部感染;多发性脑梗死;慢性肾功能不全;胆囊炎;胆囊胆固醇沉着症;胆囊息肉;肝囊肿;肾结石;肺诊断性影像异常;多发性脑梗死;老年性脑萎缩;陈旧性肋骨骨折	好转	李嘉	李嘉	李嘉	颈内静脉穿刺中心静脉置管术;呼吸机治疗[大于等于96小时];无创呼吸机辅助通气(高频通气[HFPPV]);气管内插管;胸腔穿刺抽液术
39	H10心血管内科	2025-04-20	2025-05-13	3643098	柯玉妹	女	80Y	急性非ST段抬高型心肌梗死	肱骨骨折;肺部感染;呼吸衰竭;冠状动脉粥样硬化性心脏病;KillipIV级;阵发性心房颤动;胸腔积液;肋骨多处骨折;特发性(原发性)高血压;2型糖尿病;脑梗死后遗症;肺诊断性影像异常;下肢动脉粥样硬化;下肢静脉肌间血栓形成	好转	黄明远	黄明远	王存存	肱骨骨折切开复位钢板内固定术;肱骨人工骨植骨术;肩袖修补术;颈内静脉穿刺中心静脉置管术;呼吸机治疗[大于等于96小时];气管内插管;超声引导下胸腔穿刺术;药物洗脱冠状动脉支架置入;多根导管冠状动脉造影;置入两根血管的支架;单根血管操作;经皮冠状动脉球囊扩张成形术
40	H10心血管内科	2025-06-23	2025-06-25	3663962	李能娥	女	86Y	冠状动脉粥样硬化	房性期前收缩[房性早搏];窦性心动过缓;特发性(原发性)高血压;肺诊断性影像异常;下肢动脉粥样硬化;胫前动脉闭塞;下肢静脉血栓形成;陈旧性肋骨骨折	好转	李嘉	郑如莲	刘志伟	多根导管冠状动脉造影
41	H11儿童骨科/综合骨科	2025-03-28	2025-04-07	3626698	张梅	女	56Y	三踝骨折	静脉血栓形成;踝关节脱位;肝血管瘤;二尖瓣反流	好转	孔建中	方文来	方文来	踝关节骨折切开复位钢板内固定术;关节滑膜切除术
42	H11儿童骨科/综合骨科	2025-04-02	2025-04-19	3631988	谢纯定	男	63Y	外踝骨折	膝关节内侧副韧带损伤;额窦骨折;鼻骨骨折;面部软组织挫伤;膝关节多处韧带损伤;半月板损伤;膝关节积液;下肢静脉肌间血栓形成;前列腺增生;颈椎退行性病变;颈椎间盘突出;小腿挫伤	好转	石成弟	项光恒	项光恒	踝关节骨折切开复位钢板内固定术;下腔静脉滤器置入术;下腔静脉造影;下腔静脉滤器取出术;下肢静脉造影;副韧带修补术;腓骨植骨术;石膏绷带固定
43	H11儿童骨科/综合骨科	2025-04-03	2025-04-21	3632983	余玉香	女	75Y	髌骨骨折	尺骨和桡骨下端均骨折;骨质疏松;下肢静脉肌间血栓形成;心房颤动;主动脉瓣狭窄;二尖瓣反流;三尖瓣关闭不全;膝关节退行性病变;退行性主动脉瓣疾患;主动脉(瓣)关闭不全;二尖瓣退行性变;超声心动图异常	好转	石成弟	项光恒	项光恒	髌骨骨折切开复位张力带钢丝内固定术;髌韧带缝合术
44	H11儿童骨科/综合骨科	2025-05-10	2025-05-15	3644446	张阿花	女	72Y	股骨颈骨折	脑梗死;帕金森病;动脉粥样硬化;精神分裂症;下肢静脉血栓形成;肺栓塞;老年性心脏病	好转	周一飞	周一飞	翁摄稷
45	H11儿童骨科/综合骨科	2025-04-29	2025-05-16	3644856	卢绍山	男	83Y	股骨粗隆间骨折	开放性足损伤;趾骨骨折;高血压;肺肿物;主动脉钙化;肝钙化灶;肝回声不均;胆囊息肉;后天性肾囊肿;前列腺结石;下肢静脉肌间血栓形成;前列腺增生;冠状动脉粥样硬化;下肢静脉血栓形成;退行性主动脉瓣疾患;主动脉(瓣)关闭不全;二尖瓣关闭不全;超声心动图异常	好转	水小龙	水小龙	王贤亮	股骨骨折闭合复位髓内针内固定术;皮肤和皮下坏死组织切除清创术;趾骨骨折闭合复位钢针内固定术;股骨植骨术
46	H11儿童骨科/综合骨科	2025-05-26	2025-06-01	3652465	夏景双	男	53Y	股骨骨折不连接	高血压;下肢动脉粥样硬化;后天性肾囊肿;室间隔肥大;老年性心脏瓣膜病;下肢静脉肌间血栓形成;退行性主动脉瓣疾患;超声心动图异常	治愈	黄俊武	罗鹏	罗鹏	全髋关节置换;股骨内固定装置去除术;皮肤瘢痕切除术;髋轴面，金属与聚乙烯
47	H11儿童骨科/综合骨科	2025-06-01	2025-06-05	3654563	高莲碎	女	93Y	股骨粗隆间骨折	高血压;糖尿病;老年性心脏瓣膜病;肝回声不均;胆总管扩张;肾错构瘤;后天性肾囊肿;下肢动脉粥样硬化闭塞症;下肢静脉肌间血栓形成;肺气肿合并肺大泡;肋骨骨折;室间隔肥大	治愈	水小龙	水小龙	汪吉棋	股骨骨折闭合复位髓内针内固定术
48	H11儿童骨科/综合骨科	2025-06-03	2025-06-07	3655333	吴江富	男	73Y	股骨颈骨折	慢性支气管炎;支气管扩张(症);肺气肿合并肺大泡;胸腔积液;老年性心脏病;静脉血栓形成;后天性肾囊肿;膀胱结石;前列腺增生;前列腺囊肿;前列腺结石	治愈	水小龙	水小龙	汪吉棋	人工股骨头置换术;关节滑膜切除术;髋轴面，陶瓷与聚乙烯
49	H12介入治疗科/综合外科	2025-03-24	2025-04-08	3627345	陈信友	男	66Y	股骨粗隆间骨折	下肢深静脉血栓形成;急性失血性贫血;老年性心脏病	治愈	邓超频	潘浩	陈魁	股骨人工骨植骨术;下腔静脉滤器置入术;下腔静脉造影;下腔静脉滤器取出术;下腔静脉造影;股骨骨折闭合复位髓内针内固定术
50	H12介入综合外科	2025-01-07	2025-01-08	3589533	陈玉弟	女	81Y	下肢深静脉血栓形成	下肢静脉肌间血栓形成;脾损伤;耻骨骨折;高血压;骨折术后;后天性肾囊肿	好转	邓超频	艾鹏	陈魁	下腔静脉滤器置入术;下肢静脉造影
51	H12介入综合外科	2025-01-14	2025-01-19	3593907	陈珠兰	女	66Y	下肢深静脉血栓形成	桡骨骨折;外踝骨折;肾结石;后天性肾囊肿;胃术后	治愈	邓超频	潘浩	潘浩	髂静脉球囊血管成形术;下肢静脉血栓切除术;下腔静脉滤器置入术;下肢静脉造影
52	H12介入综合外科	2025-01-28	2025-01-30	3599226	叶云飞	男	69Y	下肢深静脉血栓形成	高血压;高脂血症;骨折术后	好转	邓超频	郑继行	高自勉	下肢静脉造影
53	H12介入综合外科	2025-03-01	2025-03-03	3611952	徐呈林	男	68Y	大隐静脉曲张伴有溃疡	下肢深静脉血栓形成;高血压;下肢动脉粥样硬化;肺气肿;肺诊断性影像检查的异常所见;脂肪肝;前列腺增生;髋关节置换术后;陈旧性肋骨骨折	好转	邓超频	艾鹏	高自勉	下肢静脉造影
54	H12介入综合外科	2025-03-02	2025-03-08	3613975	张秀弟	女	74Y	大隐静脉曲张	下肢血栓性静脉炎;下肢静脉功能不全;肺诊断性影像检查的异常所见;两根肋骨骨折不伴第一肋骨骨折;脂肪肝	治愈	邓超频	陈聪	郑继行	小隐静脉高位结扎和剥脱术;下肢静脉造影;大隐静脉高位结扎和剥脱术
55	K203综合康复	2024-11-07	2025-01-13	3583198	叶春柳	女	70Y	消化道出血	腰椎骨折;股骨粗隆间骨折;肋骨多处骨折;肺挫伤;骨盆骨折;心脏停搏复苏成功;下肢静脉肌间血栓形成;下肢动脉粥样硬化;跟骨骨折;腓骨骨折;踝关节半脱位;骶骨骨折;肺部感染;泌尿道感染;手术后败血症;胸腔积液;肺挫伤;颈椎退行性病变;胆囊结石;涉及使用其他康复操作的医疗	好转	屠文展	屠文展	李慧芳	蜡疗;超声波联合治疗;运动训练;骨创伤治疗仪使用;股静脉穿刺术;下腔静脉滤器置入术;跟骨骨折切开复位钢板内固定术;关节软骨修复术;跟骨人工骨植骨术;呼吸机治疗[大于等于96小时];气管内插管
56	K203综合康复	2024-11-25	2025-01-15	3592198	胡新苗	男	48Y	肺部感染	呼吸衰竭;胸腔积液;下肢深静脉血栓形成;肝功能不全;肾功能不全;糖尿病;老年性脑萎缩;肋骨骨折;涉及使用其他康复操作的医疗	好转	蒋松鹤	卢君艳	林乐2	运动训练;作业疗法;超短波短波疗法
57	K203综合康复	2024-12-09	2025-01-21	3595012	姚爱华	女	67Y	桡骨远端骨折	肺动脉栓塞;下肢深静脉血栓形成;运动障碍;头皮血肿;肋骨骨折;肩撞击综合征;下肢静脉肌间血栓形成;胸腔积液;脂肪肝;高尿酸血症;子宫平滑肌瘤;颈椎间盘突出;涉及使用其他康复操作的医疗	好转	屠文展	屠文展	陈文斯	超声波联合治疗;关节松动法;蜡疗;骨创伤治疗仪使用;电动起立床训练;桡骨骨折切开复位钢板内固定术;关节软骨修复术;桡骨人工骨植骨术
58	K203综合康复	2024-12-31	2025-01-25	3596624	陈伟	男	34Y	圆锥马尾综合征	截瘫;运动障碍;神经源性膀胱;泌尿道感染;神经源性肠;运动障碍;陈旧性腰椎骨折;膝关节僵硬;陈旧性胫骨平台骨折;骶骨骨折;精神分裂症;下肢静脉肌间血栓形成	好转	蒋松鹤	卢君艳	程博	截瘫肢体综合训练;运动训练;超声波联合治疗;超短波短波疗法
59	K203综合康复	2024-12-14	2025-01-29	3598505	周定祥	男	52Y	脊髓损伤	创伤性截瘫;神经源性膀胱;神经源性肠;运动障碍;涉及使用康复操作的医疗;脊柱骨折;椎管狭窄;肋骨骨折;眶骨骨折;胸腔积液;肾挫伤;静脉血栓形成;下肢动脉粥样硬化;泌尿道感染;骨质疏松;蝶窦炎	好转	蒋松鹤	卢君艳	吴登敏	胸椎骨折切开复位内固定术;截瘫肢体综合训练;针灸;超短波短波疗法;电动起立床训练;物理疗法;眶骨骨折切开复位内固定术
60	K203综合康复	2024-12-29	2025-02-03	3601018	谢绍胜	男	44Y	创伤性截瘫	神经源性膀胱;神经源性肠;圆锥马尾综合征;腰椎术后;胸椎骨折;下肢静脉血栓形成;糜烂性胃炎;贫血;腰椎间盘突出;骨质疏松;泌尿道感染	好转	蒋松鹤	卢君艳	吴登敏	截瘫肢体综合训练;超声波联合治疗;运动训练;物理疗法;电动起立床训练;针灸
61	K203综合康复	2025-01-02	2025-02-19	3606845	何明全	男	51Y	锁骨骨折	创伤性脑内血肿;运动障碍;头皮血肿;创伤性蛛网膜下腔出血;颞骨骨折;髂骨骨折;涉及使用其他康复操作的医疗;肋骨多处骨折;胸椎横突骨折;腰椎骨折;创伤性湿肺;创伤性气胸;创伤性胸腔积液;多处挫伤;认知障碍;肺部感染;颈椎退行性病变;颈椎间盘突出;静脉血栓形成;胆囊结石;肾结石	好转	蒋松鹤	卢君艳	吴登敏	锁骨骨折切开复位钢板内固定术;运动训练;重复经颅磁刺激[RTMS];物理疗法;电动起立床训练;针灸;锁骨人工骨植骨术
62	K203综合康复	2024-12-21	2025-02-21	3607479	张选锋	男	54Y	肺部感染	运动障碍;累及神经和肌肉骨骼系统症状和体征;认知障碍;吞咽困难;言语障碍;泌尿道感染;静脉血栓形成;多处开放性伤口;尺骨桡骨闭合性骨折;肩胛骨骨折;跖骨骨折;肋骨骨折;手骨折;胫骨上端骨折;颈椎横突骨折;硬膜下血肿;硬脑膜下积液;开放性脑挫伤	好转	蒋松鹤	卢君艳	吴登敏	运动训练;作业疗法;物理疗法;重复经颅磁刺激[RTMS];电动起立床训练;其他热疗法;关节松动法
63	K203综合康复	2025-02-22	2025-03-05	3612848	黄利娜	女	40Y	膝关节僵硬	陈旧性膝半月板损伤;韧带术后;陈旧性胫骨骨折;陈旧性髌骨骨折;陈旧性膝外侧副韧带损伤;膝关节积液;下肢静脉肌间血栓形成;涉及使用其他康复操作的医疗	好转	蒋松鹤	卢君艳	林乐2	关节松动法;物理疗法
64	K203综合康复	2024-11-21	2025-03-05	3612888	王润莹	女	62Y	截瘫	胸部脊髓损伤;神经源性膀胱;泌尿道感染;神经源性肠;肠道感染;躯干骨继发恶性肿瘤;椎管内占位性病变;肺占位性病变;肋骨骨折;下肢静脉肌间血栓形成;肾术后;脂肪肝	好转	屠文展	卢君艳	林乐2	运动训练;物理疗法;毫针刺法;低频脉冲电治疗;截瘫肢体综合训练
65	K203综合康复	2025-02-23	2025-03-12	3615857	林惠其	男	92Y	颈椎间盘突出	颈椎退行性病变;眶骨骨折;冠状动脉粥样硬化;颈动脉硬化;老年性脑萎缩;高血压;下肢动脉粥样硬化;下肢深静脉血栓形成;涉及使用其他康复操作的医疗	好转	蒋松鹤	卢君艳	林乐2	运动训练;电动起立床训练;毫针刺法;低频脉冲电治疗;平衡功能训练
66	K203综合康复	2025-02-18	2025-03-15	3616809	叶爱英	女	82Y	偏瘫	认知障碍;大脑动脉狭窄脑梗死;髌骨骨折;下肢静脉肌间血栓形成;肝功能检查的异常结果;椎基底动脉扩张延长症;高血压;子宫平滑肌瘤;膝关节积液;膝关节退行性病变;腰椎退行性病变;后天性肾囊肿;下肢动脉粥样硬化;胆囊结石;筛窦炎;白内障;髋关节退行性病变;胸椎退行性病变	好转	屠文展	屠文展	陈文斯	电针治疗;偏瘫肢体综合训练;运动训练;电动起立床训练;骨创伤治疗仪使用;蜡疗;超声波联合治疗
67	K203综合康复	2025-02-16	2025-03-16	3617428	夏良旺	男	53Y	截瘫[双下肢瘫痪]	神经源性膀胱;神经源性肠;运动障碍;脊髓损伤;腰椎术后;脊柱骨折;腰椎间盘突出;肾结石;后天性肾囊肿;受压区压疮;泌尿道感染;上呼吸道感染;下肢静脉肌间血栓形成;涉及使用其他康复操作的医疗	好转	蒋松鹤	卢君艳	程博	肌肉骨骼运动训练;关节运动训练;悬吊治疗;低频脉冲电治疗;电动起立床训练
68	K203综合康复	2025-03-22	2025-04-09	3627987	叶挺兴	男	58Y	颈部脊髓损伤	四肢瘫痪;神经源性膀胱;神经源性肠;运动障碍;肺部感染;头部的损伤;颈椎术后;颈椎骨折C4;肥厚性心肌病;下肢静脉血栓形成;肝功能不全;电解质代谢紊乱;肝囊肿;涉及使用其他康复操作的医疗	好转	蒋松鹤	卢君艳	林乐2	截瘫肢体综合训练;运动训练;作业疗法;手功能评估;超短波短波疗法;低频脉冲电治疗;毫针刺法;局部紫外线照射
69	K203综合康复	2025-03-10	2025-04-14	3629902	胡振松	男	48Y	截瘫	神经源性膀胱;泌尿道感染;神经源性肠;脊髓损伤;脊柱骨折;膝关节损伤;胫骨平台骨折;胫骨髁间棘骨折;膝关节损伤;膝内侧半月板损伤;下肢深静脉血栓形成;涉及使用其他康复操作的医疗	好转	蒋松鹤	卢君艳	林乐2	截瘫肢体综合训练;运动训练;作业疗法;毫针刺法;电动起立床训练
70	K203综合康复	2025-03-30	2025-04-28	3636363	夏良旺	男	53Y	截瘫	神经源性膀胱;神经源性肠道功能障碍;运动障碍;脊髓损伤;腰椎术后;脊柱骨折;泌尿道感染;下肢静脉肌间血栓形成;腰椎间盘突出;涉及使用其他康复操作的医疗	好转	蒋松鹤	卢君艳	程博	运动训练;毫针刺法;截瘫肢体综合训练;电动起立床训练;磁热疗;超声波联合治疗
71	K203综合康复	2025-04-14	2025-04-29	3636966	夏碎娥	女	81Y	髋关节僵硬	陈旧性胸椎骨折;创伤性蛛网膜下腔出血;骨折术后;头皮血肿;多发性脑梗死;高血压;贫血;骨质疏松;腰椎间盘突出;静脉血栓形成;甲状腺术后;颈动脉硬化;下肢动脉粥样硬化;涉及使用其他康复操作的医疗	好转	屠文展	屠文展	吴登敏	运动训练;物理疗法
72	K203综合康复	2025-03-31	2025-05-10	3642014	金胡小	女	48Y	骶骨骨折	耻骨骨折;脑震荡;头皮血肿;肌腱和肌肉损伤;下肢静脉肌间血栓形成;下肢动脉粥样硬化;颈椎间盘突出;脊椎退行性病变;泌尿道感染;肺诊断性影像检查的异常所见;涉及使用其他康复操作的医疗	好转	屠文展	屠文展	吴登敏	运动训练;物理疗法;其他热疗法
73	K203综合康复	2025-03-30	2025-05-24	3636798	戚三玉	女	70Y	基底节脑梗死	偏瘫;肌张力障碍;涉及使用康复操作的医疗;股骨颈骨折;髋关节置换术后;神经源性膀胱;泌尿道感染;肾盂积水，其他的;输尿管扩张;肾结石;肝功能不全;脱髓鞘性白质脑病;高血压;胆囊术后;肺诊断性影像检查的异常所见;下肢动脉粥样硬化;下肢静脉肌间血栓形成	好转	蒋松鹤	卢君艳	林乐2	运动训练;作业疗法;电动起立床训练;低频脉冲电治疗;其他热疗法;重复经颅磁刺激[RTMS]
74	K203综合康复	2025-04-16	2025-05-26	3649766	叶玉贵	男	84Y	四根以上肋骨骨折不伴第一肋骨骨折	胸腔积液;多发性脑梗死;高血压;2型糖尿病;心房颤动;静脉血栓形成;动脉粥样硬化;神经源性膀胱;前列腺增生;轻度贫血;涉及使用其他康复操作的医疗	治愈	屠文展	屠文展	李慧芳	骨创伤治疗仪使用;超短波短波疗法
75	K203综合康复	2025-05-15	2025-06-01	3652808	甘绿环	女	44Y	脑挫伤	创伤性蛛网膜下出血;创伤性硬膜下出血;颞骨骨折;头皮裂伤;头皮血肿;皮肤挫伤;贫血;慢性乙型病毒性肝炎;下肢静脉血栓形成;肾上腺结节性增生;肺诊断性影像检查的异常所见;盆腔积液;肝囊肿;低钾血症;甲状腺功能减退症;涉及使用康复操作的医疗	好转	屠文展	屠文展	李慧芳	超短波短波疗法;运动训练;毫针刺法
76	K203综合康复	2025-05-13	2025-06-17	3660089	高丽丽	女	70Y	偏瘫	言语障碍;运动障碍;涉及使用康复操作的医疗;脑梗死;创伤性蛛网膜下腔出血;开放性脑挫伤;手术后恢复期;股骨粗隆间骨折;硬脑膜下积液;肋骨多处骨折;2型糖尿病;高血压;下肢静脉肌间血栓形成;动脉硬化;肝囊肿;肾盂积水，其他的;输尿管扩张;泌尿道感染;轻度贫血;低钾血症	好转	屠文展	屠文展	李慧芳	骨创伤治疗仪使用;偏瘫肢体综合训练;运动训练;作业疗法;语言治疗;毫针刺法
77	K204神经康复	2025-01-28	2025-02-25	3609040	孙芬香	女	81Y	运动障碍	脑内出血;颈动脉瘤;肺部感染;肝损害;静脉血栓形成;高血压性心脏病;言语障碍;吞咽困难;运动障碍;脑梗死后遗症;陈旧性尺桡骨骨折;颈动脉硬化;后天性肾囊肿;肺结节病;老年性心脏瓣膜病;涉及使用康复操作的医疗	好转	刘宝华	商萍	覃燕青	其他物理治疗;作业疗法;物理疗法;低频脉冲电治疗;电动起立床训练;语言障碍训练;针灸
78	K204神经康复	2024-12-08	2025-02-27	3610432	谢成周	男	78Y	偏瘫	脑梗死;运动障碍;肺部感染;特发性(原发性)高血压;累及神经和肌肉骨骼系统症状和体征;认知障碍;吞咽困难;言语障碍;神经源性膀胱;神经源性肠;涉及使用康复操作的医疗;脑梗死后遗症;骨质疏松伴有病理性骨折;卒中后抑郁;肺气肿;肺气肿合并肺大泡;下肢静脉肌间血栓形成;颈动脉硬化	好转	刘宝华	商萍	金翩翩	运动训练;关节松动法;其他热疗法;超短波短波疗法;重复经颅磁刺激[RTMS]
79	K204神经康复	2025-01-26	2025-03-02	3611313	张茂龙	男	68Y	肺部感染	胸腔积液;肺挫伤;脑梗死;下肢静脉血栓形成;药物性肝损害;泌尿道感染;气胸;功能性吞咽困难;运动障碍;创伤性脾破裂;肋骨骨折;下肢动脉粥样硬化;慢性失血性贫血;鼻骨骨折;硬脑膜下积液;头皮裂伤;单侧腹股沟疝;低钾血症;言语障碍;认知障碍;由于活动能力降低而需要帮助	好转	刘宝华	商萍	覃燕青	超声引导下胸腔穿刺术;超声引导下胸腔穿刺术;物理疗法;低频脉冲电治疗;超短波短波疗法;作业疗法;电动起立床训练;中医按摩手法治疗;关节松动法;其他热疗法
80	K204神经康复	2025-04-14	2025-04-23	3634076	刘万傍	男	82Y	运动障碍	膝关节僵硬;涉及使用康复操作的医疗;帕金森综合征;股骨颈骨折;冠状动脉粥样硬化性心脏病;特发性(原发性)高血压;轻度贫血;下肢动脉粥样硬化;下肢静脉血栓形成;前列腺增生;青光眼术后;胆囊结石;后天性肾囊肿	好转	刘宝华	刘宝华	胡晓晓	运动训练;低频脉冲电治疗;平衡功能训练;电动起立床训练;其他控制气压和空气成分的疗法;针灸
81	K204神经康复	2025-03-12	2025-05-17	3645348	夏宝娣	女	83Y	慢性阻塞性肺病	呼吸困难;认知障碍;运动障碍;涉及使用康复操作的医疗;呼吸衰竭;肺部感染;肋骨骨折;骨质疏松;多发性脑梗死;老年性脑萎缩;尿潴留;陈旧性肺结核;泌尿道感染;下肢动脉粥样硬化;静脉血栓形成;脂肪肝;肾错构瘤	好转	刘宝华	刘宝华	金翩翩	运动训练;作业疗法;呼吸训练;毫针刺法;电动起立床训练;平衡功能训练;无创呼吸机辅助通气(双水平气道正压[BiPAP])
82	K204神经康复	2025-05-11	2025-05-28	3650835	李德荣	男	66Y	偏瘫	出血性脑梗死;脑梗死恢复期;运动障碍;神经源性膀胱;神经源性肠;涉及使用康复操作的医疗;心房颤动;大脑中动脉闭塞和狭窄;下肢静脉血栓形成;肋骨骨折;下肢动脉粥样硬化;心房扩大;前列腺结石	好转	刘宝华	戴威	戴威	运动训练;电动起立床训练;低频脉冲电治疗;针灸
83	K204神经康复	2025-03-25	2025-06-17	3659987	谢成周	男	78Y	肺部感染	脑梗死后遗症;偏瘫;运动障碍;累及神经和肌肉骨骼系统症状和体征;认知障碍;吞咽困难;言语障碍;神经源性膀胱;神经源性肠;特发性(原发性)高血压;骨质疏松伴有病理性骨折;卒中后抑郁;肺气肿;肺大疱;静脉血栓形成;低钾血症;前列腺增生;颈动脉硬化;下肢动脉粥样硬化;低蛋白血症	好转	刘宝华	黄世园	戴威
84	L103呼吸/风湿免疫	2025-01-21	2025-01-28	3597680	姚爱华	女	67Y	急性肺血栓栓塞症	肋骨多处骨折;肩撞击综合征;头皮血肿;应激性溃疡;肝功能不全;肠道菌群失调;脂肪肝;高尿酸血症;子宫平滑肌瘤;下肢深静脉血栓形成;下肢静脉肌间血栓形成;颈椎间盘突出;骨折术后	治愈	林洁2	俞丽华	俞丽华
85	L103呼吸内科	2025-03-24	2025-04-01	3624150	庄秋菊	女	68Y	支气管扩张伴感染	支气管哮喘;肺诊断性影像检查的异常所见;高血压性心脏病;骨质疏松;脑血管病后遗症;下肢动脉粥样硬化;下肢静脉肌间血栓形成;胸椎压缩性骨折;脊柱侧弯;骨质破坏;低钾血症	好转	林洁2	金芬华	林中豪
86	L103呼吸内科	2025-04-24	2025-04-28	3636516	姚爱华	女	67Y	肺栓塞	下肢深静脉血栓形成;甲状腺结节;乳房纤维囊性乳腺病;糜烂性胃炎;高脂血症;脂肪肝;高尿酸血症;子宫平滑肌瘤;陈旧性肋骨骨折;颈椎间盘突出;甲状腺术后;骨折术后	好转	戴元荣	林慧	王道会	胃镜检查;结肠镜检查
87	L104呼吸/肾内科	2025-02-01	2025-03-08	3614117	吴碎香	女	65Y	腰椎骨折L3	先天性髋臼发育不良;肺栓塞;髋关节周围炎;胆囊炎;胆囊结石;肝功能不全;骨质疏松;高血压;癫痫;银屑病;下腔静脉血栓形成;甲状腺术后;子宫术后	好转	颜孙舜	颜孙舜	彭燕平	腰椎骨折球囊扩张成形术;全髋关节置换;关节滑膜切除术;髋轴面，陶瓷与聚乙烯
88	L104呼吸/肾内科	2025-03-07	2025-03-28	3622574	董瑞快	男	81Y	支气管哮喘	呼吸衰竭;心脏停搏复苏成功;肺部感染;心功能不全;骨折术后;肾损伤;心房颤动[心房纤颤];胸腔积液;包绕性睾丸鞘膜积液;低蛋白血症;谵妄;下肢静脉肌间血栓形成;胆囊结石;后天性肾囊肿;前列腺增生;前列腺结石	未愈	颜孙舜	颜孙舜	彭燕平	全髋关节假体翻修术;胸腔穿刺术;呼吸机治疗[小于96小时];股骨骨折切开复位内固定术;水泥间隔物取出术;髋轴面，陶瓷与聚乙烯;气管内插管
89	L105CCU/综合ICU	2025-02-10	2025-02-22	3608011	朱炳川	男	77Y	急性心肌梗死	心源性休克;心脏停搏复苏成功;冠状动脉粥样硬化性心脏病;心室颤动;肝功能不全;急性肾功能不全;低蛋白血症;低钾血症;胫骨骨折累及踝关节;腓骨骨折;单纯性肾囊肿;前列腺结石;下肢动脉血栓形成	未愈	张素勤	张素勤	罗宏	多根导管冠状动脉造影;经皮冠状动脉球囊扩张成形术;药物洗脱冠状动脉支架置入;主动脉球囊反搏置入术;置入一根血管的支架;单根血管操作;胫骨骨折切开复位螺钉内固定术;踝关节骨折切开复位钢板内固定术;胫骨人工骨植骨术;膝关节半月板成形术;关节固定术
90	L105CCU/综合ICU	2025-04-07	2025-04-17	3631419	曾春香	女	81Y	急性冠脉综合征	冠状动脉粥样硬化性心脏病;高血压;胸椎压缩性骨折;腰椎压缩性骨折;骨质疏松;老年性脑萎缩;后天性肾囊肿;下肢动脉狭窄;胫前动脉闭塞;下肢静脉血栓形成;头皮血肿	好转	张素勤	邢大伟	罗宏	多根导管冠状动脉造影
91	L107心血管內科	2025-03-16	2025-03-18	3618474	张爱贞	女	75Y	更换心脏起搏器	病态窦房结综合征;高血压;肺诊断性影像检查的异常所见;胆囊结石;肱骨上端骨折;胸椎楔形变;慢性乙型病毒性肝炎;下肢深静脉血栓形成	其他	林加锋	李进	郑程	永久起搏器置换术
92	L108神经内科	2024-12-12	2025-01-06	3588506	冯兰花	女	80Y	胸椎骨折	多发性脑梗死;颈动脉硬化;下肢静脉肌间血栓形成;高血压;桡骨远端骨折;尺骨茎突骨折;肺部感染;肺肿物;骨质疏松;后天性肾囊肿;锁骨下动脉粥样硬化;下肢动脉粥样硬化	治愈	陈松芳	陈松芳	刘荣培	胸椎骨折切开复位内固定术;经皮椎骨成形术;椎骨活组织检查
93	L108神经内科	2025-01-21	2025-02-18	3606429	叶爱英	女	82Y	大脑动脉的闭塞或狭窄引起的脑梗死	椎基底动脉扩张延长症;特发性(原发性)高血压;髌骨骨折;子宫平滑肌瘤;膝关节积液;膝关节退行性病变;下肢静脉血栓形成;腰椎退行性病变;后天性肾囊肿;下肢动脉粥样硬化;胆囊结石;筛窦炎;白内障;髋关节退行性病变;胸椎退行性病变;肩关节关节病;大脑前动脉狭窄	好转	韩钊	韩钊	朱兰兵
94	L108神经内科	2025-03-10	2025-03-30	3623533	戚三玉	女	70Y	多发性脑梗死	股骨颈骨折;泌尿道感染;腔隙性脑梗死;脱髓鞘性白质脑病;老年性脑萎缩;高血压;胆囊切除术后状态;肺肿物;下肢动脉粥样硬化;下肢静脉肌间血栓形成;髋关节置换术后	好转	韩钊	韩钊	韩钊	人工股骨头置换术
95	L108神经内科	2025-03-16	2025-04-13	3629399	李春叶	女	73Y	股骨颈骨折	大脑动脉狭窄脑梗死;脑动脉狭窄;肺部感染;下肢静脉肌间血栓形成;特发性(原发性)高血压;2型糖尿病;下肢动脉粥样硬化;胸腔积液;脂肪肝	好转	胡蓓蕾	胡蓓蕾	郑园园	全髋关节表面置换术;关节滑膜切除术
96	L111肛肠外科	2025-03-25	2025-04-08	3627310	董光亮	男	79Y	直肠恶性肿瘤	肠粘连;下肢动脉粥样硬化;下肢静脉血栓形成;肺肿物;肝囊肿;膀胱结石;前列腺增生;前列腺钙化灶;膀胱憩室;肋骨骨折;股骨囊性纤维性骨炎	好转	刘长宝	王中林	曹伟兰	腹腔镜下直肠根治术;腹腔镜下肠粘连松解术
97	L113内分泌科	2025-02-23	2025-03-04	3612278	潘国銮	男	94Y	2型糖尿病	低血糖性昏迷;下肢动脉粥样硬化;高血压性心脏病;颈动脉硬化;冠状动脉粥样硬化性心脏病;多发性脑梗死;骨质疏松;下肢静脉血栓形成;高促性腺激素性性腺功能减退症;甲状腺结节;陈旧性耻骨骨折	好转	吴朝明	周盈盈	翁晓璐
98	L115肿瘤放化疗科	2024-12-10	2025-01-13	3591377	章福美	男	50Y	恶性肿瘤维持性化学治疗	肺恶性肿瘤;骨继发恶性肿瘤;脊髓损伤;截瘫;神经源性肠;神经源性膀胱;运动障碍;病理性骨折，不可归类在他处者;后天性肾囊肿;前列腺结石;下肢静脉血栓形成	好转	吴剑	吴剑	林瑞芳	静脉注射化疗药物;静脉注射化疗药物
99	L115肿瘤放化疗科	2025-01-13	2025-02-06	3602383	章福美	男	50Y	恶性肿瘤维持性化学治疗	肺恶性肿瘤;骨继发恶性肿瘤;脊髓损伤;截瘫;神经源性膀胱;神经源性肠;运动障碍;化疗后骨髓抑制;病理性骨折，不可归类在他处者;后天性肾囊肿;前列腺结石;下肢静脉血栓形成	好转	吴剑	吴剑	李平平	静脉注射化疗药物
100	L205重症医学科	2024-12-16	2025-01-22	3595584	张于尧	男	68Y	创伤性血气胸	失血性休克;消化道出血;连枷胸;肺挫伤;肺部感染;开放性上肢骨折;急性肾功能不全;创伤性指坏死;肋骨骨折;肩胛骨骨折;肱骨骨折;颈椎骨折C7;腰椎骨折;硬脑膜下积液;肘关节脱位;外耳挫伤;下肢静脉血栓形成;皮肤挫伤	好转	龚裕强	谢媚媚	谢媚媚	肺修补术;开胸止血术;经前臂截断术;皮肤和皮下坏死组织切除清创术;创面封闭式负压引流术（VSD);皮瓣转移术;肘脱位闭合性复位术;肋骨骨折切开复位内固定术;腹腔干动脉造影;肠系膜上动脉造影;胃十二指肠动脉栓塞术;腹主动脉造影;气管内插管;呼吸机治疗[大于等于96小时]
101	L205重症医学科	2024-12-10	2025-01-30	3599216	陈通财	男	67Y	脊髓损伤	呼吸衰竭;肺部感染;急性四肢瘫;颈椎骨折;肝功能不全;泌尿道感染;低蛋白血症;静脉血栓形成	未愈	程碧环	吴海亚	吴海亚	锁骨下静脉穿刺术;暂时性气管切开术;呼吸机治疗[大于等于96小时];寰-枢椎融合术，后入路;椎体脊椎融合装置的置入;2-3个椎骨融合或再融合;颈椎脱位切开复位术;纤维支气管镜检查伴肺泡灌洗术;纤维支气管镜检查伴肺泡灌洗术;纤维支气管镜检查伴肺泡灌洗术
102	L205重症医学科	2025-03-09	2025-03-13	3616470	黄兰香	女	81Y	创伤性膀胱破裂	高血压;腰椎压缩性骨折;肾功能不全;慢性支气管炎;胸腔积液;骨质疏松;后天性肾囊肿;下肢深静脉血栓形成	好转	龚裕强	王本极	王本极	膀胱裂伤缝合术;腹腔冲洗检查
103	L205综合ICU	2025-03-07	2025-04-02	3625243	陶朝葆	男	52Y	开放性胫腓骨干骨折	急性上消化道出血;下肢软组织感染;骨炎;酒精性肝病;肝硬化失代偿期;胸腔积液;腹水;肝肾综合征;肝肺综合征;肝性脑病;I型呼吸衰竭;低蛋白血症;下肢静脉血栓形成	好转	林孟相	项建文	戴洲豪	胫骨骨折切开复位钢针内固定术;皮肤和皮下坏死组织切除清创术;创面封闭式负压引流术（VSD);胫骨外固定术;骨空隙骨水泥填充术;皮肤和皮下坏死组织切除清创术;骨空隙骨水泥填充术;创面封闭式负压引流术（VSD);皮瓣预制术;创面封闭式负压引流术（VSD);游离皮瓣移植术
104	L205综合ICU	2025-05-14	2025-05-29	3651840	白明松	男	46Y	创伤性硬膜下出血	创伤性脑疝;呼吸衰竭;失血性休克;股骨骨折;创伤性骨筋膜室综合征;头皮血肿;锁骨骨折;髂骨骨折;髋臼骨折;股骨颈骨折;开放性胫腓骨干骨折;腘动脉损伤;肺部感染;下肢静脉肌间血栓形成;下肢动脉粥样硬化	未愈	龚裕强	傅蓓蓓	傅蓓蓓	大腿截断术;皮肤和皮下坏死组织切除清创术;带蒂皮瓣移植术;创面封闭式负压引流术（VSD);带蒂皮瓣迁徙术;颅骨去骨瓣减压术;脑内血肿清除术;气管内插管;呼吸机治疗[大于等于96小时];颈内静脉穿刺中心静脉置管术;纤维支气管镜检查伴肺泡灌洗术
105	L206心胸/整形/血管外科	2025-03-31	2025-05-10	3641515	朱善绍	男	59Y	开放性肱骨干骨折	创伤性脾破裂;创伤性血气胸;腹腔内出血;失血性休克;四根以上肋骨骨折不伴第一肋骨骨折;肾挫伤;多处挫伤;肺部感染;后天性肾囊肿;肾结石;前列腺增生;下肢静脉肌间血栓形成;下肢动脉粥样硬化;腔隙性脑梗死;脱髓鞘性脑病;心包积液	治愈	黄宪平	黄宪平	谷利中	肱骨骨折切开复位钢板内固定术;全脾切除术;开腹探查术;肌肉清创术;胸腔镜下肺切开血肿清除术;胰尾修补术;少于96小时连续的持续性侵入性机械性通气;气管内插管;骨移植术;游离皮肤移植
106	L206心胸/整形/血管外科	2025-05-08	2025-05-17	3645012	乔文全	男	48Y	髂静脉血栓形成	高血压;下肢深静脉血栓形成;肺肿物;脾大;肾结石;骨折术后;脂肪肝;多发性肝囊肿	治愈	郑祥韬	陈聪	陈魁	髂静脉支架置入术;髂静脉球囊血管成形术;下腔静脉滤器置入术;下肢静脉置管溶栓术;下肢静脉血栓切除术;下腔静脉造影;髂静脉造影;下肢静脉造影
107	L206心胸/整形/血管外科	2025-06-10	2025-06-16	3659441	周奶娒	女	73Y	下肢深静脉血栓形成	髂静脉血栓形成;腰椎间盘突出;腰椎术后;骨质疏松;陈旧性肋骨骨折;肺肿物;脂肪肝;后天性肾囊肿	好转	郑祥韬	陈聪	潘浩	下肢静脉造影
108	L206心胸/整形/血管外科	2025-05-16	2025-06-18	3660375	金彩云	女	66Y	下肢深静脉血栓形成	开放性脑挫伤;创伤性脑血肿;创伤性蛛网膜下腔出血;皮下血肿;眶骨骨折;肺肿物;高血压;创伤性胸腔积液;冈上肌肌腱损伤;肩关节积液;胸椎退行性病变;脊柱血管瘤;颈椎间盘突出;腰椎退行性病变;骨囊肿;慢性乙型病毒性肝炎;腰椎间盘突出	好转	邓超频	艾鹏	郑继行	下腔静脉滤器置入术;下腔静脉造影;眶骨骨折切开复位内固定术;下肢静脉造影
109	L207神经外科/神经内科	2024-12-28	2025-02-20	3607202	谢定道	男	83Y	创伤性硬脑膜下血肿	脑挫伤;创伤性蛛网膜下腔出血;头皮血肿;颅骨多发性骨折;肋骨多处骨折;下肢静脉血栓形成;肺部感染;胸腔积液	好转	张弩	俞丽生		脑内血肿清除术;脑内血肿清除术;暂时性气管切开术
110	L207神经外科/神经内科	2025-01-21	2025-03-02	3611331	谷逊其	男	73Y	弥散性大脑损伤伴出血	高血压;创伤性硬脑膜下血肿;创伤性蛛网膜下腔出血;颞骨骨折;下肢静脉血栓形成;乙型肝炎肝硬化;肺肿物;胸腔积液;后天性肾囊肿;肾结石;多发性脑梗死;老年性脑萎缩	好转	张弩	陈彦克		脑内血肿清除术
111	L208神经外科	2024-12-17	2025-01-18	3593423	张建兴	男	55Y	创伤性硬脑膜下出血	脑挫伤;创伤性蛛网膜下腔出血;创伤性硬脑膜外出血;肱骨干骨折;锁骨骨折;肩胛骨骨折;脾损伤;肺部感染;急性失血性贫血;低蛋白血症;肝功能不全;下肢静脉血栓形成;肋骨多处骨折;颞骨骨折;脂肪肝	好转	张弩	周辉	蔡铭	全脾切除术;肱骨骨折切开复位钢板内固定术;锁骨骨折切开复位钢板内固定术;脑膜切开伴硬脑膜下腔血肿清除术;肩胛骨骨折切开复位钢板内固定术;肱骨人工骨植骨术;肩胛骨，锁骨和胸廓［肋骨和胸骨］移植术
112	L208神经外科	2025-01-14	2025-02-17	3606335	张以弟	男	82Y	创伤性硬脑膜下血肿	多发性脑梗死;上颌骨骨折;高血压;胸腔积液;下腔静脉血栓形成	好转	周辉	俞丽生	卢相琦	硬脑膜下钻孔引流术
113	L208神经外科	2024-12-29	2025-02-26	3609990	董利心	女	61Y	创伤性脑疝	创伤性脑血肿;创伤性蛛网膜下腔出血;颞骨骨折;颅底骨折;眶骨骨折;头皮挫伤;眼睑挫伤;肋骨多发性骨折伴第一肋骨骨折;锁骨骨折;创伤性湿肺;胸腔积液;肺部感染;肺肿物;后天性肾囊肿;胫骨远端骨折伴腓骨骨折;肝功能不全;下肢静脉血栓形成	好转	张弩	周辉	俞丽生	脑内血肿清除术;暂时性气管切开术;锁骨骨折切开复位钢板内固定术;锁骨人工骨植骨术
114	L208神经外科	2025-03-11	2025-04-05	3625967	周美娟	女	85Y	创伤性蛛网膜下腔出血	颅骨骨折;肋骨骨折;胸腔积液;低钠血症;低氯血症;胆囊结石;后天性肾囊肿;下肢静脉血栓形成	好转	张弩	周辉	卢相琦
115	L208神经外科	2025-03-25	2025-04-06	3626338	倪根友	男	60Y	颅骨缺损修补	肺部感染;脑外伤后综合征;肺肿物;下肢静脉血栓形成;前列腺结石;肋骨骨折	其他	张弩	周辉	蔡铭	颅骨修补术
116	L208神经外科	2025-04-25	2025-05-24	3648598	项连珠	女	80Y	脑挫伤	创伤性硬脑膜下血肿;枕骨骨折;创伤性蛛网膜下腔出血;头皮挫伤;肺部感染;颈椎间盘突出;高血压;下肢静脉血栓形成;肩袖损伤	好转	张弩	张弩	张弩
117	L208神经外科	2025-05-23	2025-06-05	3654560	李启水	男	84Y	创伤性蛛网膜下腔出血	眶骨骨折;特发性(原发性)高血压;胸腔积液;主动脉钙化;后天性肾囊肿;下肢静脉血栓形成	好转	张弩	周辉	俞丽生
118	L208神经外科	2025-03-30	2025-06-30	3666112	陈静	男	47Y	多发性大脑挫裂伤	创伤性蛛网膜下出血;肺挫伤;肋骨多处骨折;锁骨骨折;创伤性血气胸;肾挫伤;腓骨骨折;下肢静脉肌间血栓形成;肺部感染;胸腔积液;气管造口状态	好转	张弩	周辉	蔡铭	胸腔闭式引流术;胸腔闭式引流术
119	L210胃肠肿瘤外科	2025-02-17	2025-03-15	3616996	郑桂兰	女	82Y	胸主动脉假性动脉瘤	贲门胃底恶性肿瘤;静脉血栓形成;贫血;低蛋白血症;败血症;胸腔积液;主动脉钙化;颈动脉硬化;后天性肾囊肿;肋骨骨折	治愈	黄颖鹏	胡经纬	张良	胸主动脉覆膜支架腔内隔绝术;胸主动脉造影;超声引导下胸腔穿刺术;超声引导下胸腔穿刺术
120	L212肝胆胰外科	2025-01-21	2025-02-08	3603732	张秀莲	女	89Y	胆总管结石伴急性胆囊炎	胆囊结石伴慢性胆囊炎急性发作;脂肪肝;心房颤动;下肢深静脉血栓形成;冠状动脉粥样硬化性心脏病;陈旧性肋骨骨折;肺动脉高压;胸腔积液;后天性肾囊肿;下肢动脉粥样硬化;高血压;糖尿病	治愈	金洲祥	金洲祥	陈克2	腹腔镜-胆道镜联合探查取石术;腹腔镜下胆囊切除术;腹腔镜下胆总管T管引流术
121	L212肝胆胰外科	2025-01-27	2025-02-19	3606643	吴美英	女	87Y	胰腺假囊肿	结肠瘘;胆总管结石伴急性化脓性胆管炎;慢性胰腺炎;急性冠脉综合征;急性心肌梗死;心功能不全;呼吸衰竭;心房颤动;肥厚性心肌病;十二指肠憩室;脂肪肝;肾结石;后天性肾囊肿;肋骨骨折;肺肿物;下肢动脉粥样硬化;静脉血栓形成;高血压;2型糖尿病;肺部感染;低蛋白血症;低钾血症;贫血	治愈	王继生	陈辉2	白炳隆	横结肠部分切除术;腹膜后脓肿切开引流术;腹膜后活检术;腹腔粘连松解术;胆管切开取石术（伴T管引流）;空肠造口术
122	L212肝胆胰外科	2025-02-20	2025-02-25	3609286	金林娇	女	70Y	十二指肠恶性肿瘤	肝继发恶性肿瘤;恶病质;低蛋白血症;腹腔积液;心功能不全;下肢静脉血栓形成;肝囊肿;盆腔肿物;肺部感染;胸腔积液;骨折术后	未愈	王继生	陈辉2	白炳隆
123	L212肝胆胰外科	2025-03-27	2025-03-27	3622464	张秀莲	女	89Y	胆总管残余结石	脂肪肝;肋骨骨折;心房颤动;冠状动脉粥样硬化性心脏病;二尖瓣退行性变;三尖瓣疾病,其他的;肺动脉高压;胸腔积液;后天性肾囊肿;下肢动脉血栓形成;下肢动脉粥样硬化;高血压;糖尿病;胆道术后	治愈	金洲祥	金洲祥	陈克2	经T管胆道镜下胆总管取石术
124	L214泌尿外科	2025-03-21	2025-04-08	3627375	黄忠存	男	67Y	肾错构瘤	后天性肾囊肿;腰椎骨折L2;肋骨多处骨折;肺挫伤;胸腔积液;下肢静脉血栓形成;胸椎骨折T9/T10	治愈	何有华	何有华	范来来	腹腔镜下单侧肾切除术;腹腔镜下肾周粘连松解术;腹腔镜下盆腔粘连松解术
125	L215血液肿瘤科	2025-02-15	2025-02-23	3608109	裘姜金	男	73Y	阵发性睡眠性血红蛋白尿	肠系膜动脉血栓形成;原发性血小板增多症;2型糖尿病;特发性(原发性)高血压;肾移植状态;肾挛缩;后天性肾囊肿;肝囊肿;骨折术后	好转	郭文坚	何牧卿	杨向绸
126	L215血液肿瘤科	2025-04-27	2025-05-04	3639175	黄兰英	女	74Y	缺铁性贫血	泌尿道感染;慢性胃炎;升结肠良性肿瘤;肺肿物;特发性(原发性)高血压;白癜风;痛风;肝囊肿;后天性肾囊肿;颈动脉硬化;下肢动脉粥样硬化;下肢静脉血栓形成;肋骨骨折	好转	姚荣欣	黄河2	黄樾樾	胃镜检查;结肠镜下大肠活组织检查
127	O106创伤骨科	2024-12-17	2025-01-02	3587290	徐笑容	女	65Y	髌骨骨折	心功能不全;脂肪肝;肝钙化灶;后天性肾囊肿;下肢静脉血栓形成	好转	翁益民	翁益民	蔡乐益	髌骨骨折切开复位内固定术;关节软骨修复术;股四头肌成形术
128	O106创伤骨科	2024-12-12	2025-01-06	3588593	吴呈余	男	71Y	开放性胫腓骨干骨折	下肢皮肤撕裂伤;小腿血管损伤;皮炎;下肢动脉粥样硬化;下肢静脉肌间血栓形成;肝回声不均;前列腺增生;高血压;2型糖尿病;小腿神经损伤;小腿水平肌肉损伤;前列腺结石	好转	王鉴顺	王鉴顺	王贤亮	胫骨骨折切开复位钢针内固定术;胫骨外固定术;皮肤缝合术;胫骨开放性骨折清创术;肌腱、血管、神经探查术;创面封闭式负压引流术（VSD);呼吸机治疗[小于96小时];气管内插管;应用单平面外固定架
129	O106创伤骨科	2024-12-20	2025-01-08	3589366	陈安全	男	64Y	内踝骨折	跖骨骨折;楔状骨骨折(足);下肢静脉肌间血栓形成;脂肪肝;肝囊肿;前列腺结石;前列腺增生;胸腔积液;清创术后	好转	王鉴顺	王鉴顺	王贤亮	踝关节骨折切开复位螺钉内固定术;关节软骨修复术;跖骨骨折切开复位钢板内固定术;皮肤伤口切除性清创术;石膏托固定术;跖骨植骨术
130	O106创伤骨科	2025-01-02	2025-01-12	3591072	张锡绿	男	76Y	股骨粗隆间骨折	下肢深静脉血栓形成;2型糖尿病;脑卒中后遗症;心功能不全;脂肪肝;肝囊肿;胆囊结石;肾结石;前列腺增生;前列腺结石;肺诊断性影像检查的异常所见;胸腔积液;腰椎退行性病变;腰椎间盘突出;腰椎椎管狭窄;退行性主动脉瓣疾患;主动脉(瓣)关闭不全;腰椎滑脱	好转	翁益民	翁益民	蔡乐益	股骨骨折闭合复位髓内针内固定术;下腔静脉滤器置入术;股骨人工骨植骨术;股骨颈/股骨转子间骨折手法整复术
131	O106创伤骨科	2024-12-21	2025-01-12	3591085	张茂弟	男	59Y	多发性骨盆骨折	骶骨骨折;髂骨骨折;耻骨骨折;肩胛骨骨折;肋骨多处骨折;肺挫伤;创伤性气胸;创伤性胸腔积液;胸壁挫伤;单侧腹股沟疝;肾结石;下肢静脉肌间血栓形成;下肢动脉粥样硬化	好转	王鉴顺	王鉴顺	王贤亮	骨盆骨折闭合复位内固定术;盆骨外固定术;外部固定装置应用，单相系统
132	O106创伤骨科	2025-01-02	2025-01-18	3593401	廖大元	男	68Y	髂骨骨折	髋臼骨折;坐骨骨折;耻骨骨折;胸椎压缩性骨折;肋骨多处骨折;胸腔积液;脂肪肝;主动脉钙化;下肢静脉血栓形成;腹腔积液;关节软骨疾患，其他的	好转	孔建中	陈墨川	陈墨川	骨盆骨折切开复位钢板内固定术;经导管髂内动脉栓塞术;髂动脉造影;关节软骨修复术;骨盆植骨术
133	O106创伤骨科	2025-01-21	2025-01-26	3596778	黄亦辉	男	31Y	外踝骨折	踝关节积液;脂肪肝;下肢静脉肌间血栓形成;眼球穿通伤术后	好转	孔建中	陈墨川	陈墨川	踝关节骨折切开复位钢板内固定术;关节软骨修复术;踝融合术;腓骨植骨术
134	O106创伤骨科	2025-01-11	2025-01-26	3597024	谭春国	男	52Y	髂骨骨折	髋臼骨折;髋关节脱位;股骨下端骨折;腓骨干骨折;尺骨茎突骨折;趾骨骨折;胸椎骨折;膝关节外侧副韧带损伤;膝关节后十字韧带损伤;弥漫性轴索损伤;高血压;皮肤挫伤;脂肪肝;后天性肾囊肿;老年性心脏病;下肢静脉血栓形成;清创术后	治愈	水小龙	水小龙	陈春慧	骨盆骨折切开复位钢板内固定术;关节软骨修复术;骨盆植骨术;髋关节脱位切开复位内固定术;副韧带修补术
135	O106创伤骨科	2025-01-20	2025-01-29	3598305	林显芬	女	66Y	肱骨近端骨折	腰椎压缩性骨折;肩胛骨骨折;耻骨分支骨折;高血压;下肢动脉粥样硬化;下肢静脉肌间血栓形成;精神分裂症	治愈	水小龙	水小龙	陈春慧	肱骨骨折切开复位钢板内固定术;关节软骨修复术;肱骨植骨术
136	O106创伤骨科	2025-01-25	2025-01-31	3599339	吴玉妹	女	81Y	股骨粗隆间骨折	桡骨远端骨折;前臂挫伤;肺诊断性影像检查的异常所见;施莫尔结;下肢静脉肌间血栓形成;肾超声检查异常;输尿管扩张	治愈	水小龙	水小龙	陈春慧	股骨骨折闭合复位髓内针内固定术
137	O106创伤骨科	2025-01-29	2025-02-09	3604089	吴雪梅	女	91Y	股骨颈骨折	骨质疏松;高血压;肺诊断性影像检查的异常所见;心功能不全;肝钙化灶;胆囊结石;后天性肾囊肿;肾结石;退行性主动脉瓣疾患;二尖瓣反流;下肢静脉肌间血栓形成	好转	翁益民	翁益民	蔡乐益	人工股骨头置换术;髋关节滑膜切除术;股骨人工骨植骨术;筋膜成形术;髋轴面，陶瓷与聚乙烯
138	O106创伤骨科	2025-02-25	2025-03-08	3613980	钱满绿	女	54Y	股骨粗隆下骨折	下肢静脉肌间血栓形成	治愈	石成弟	项光恒	蔡海丰	股骨骨折切开复位髓内针内固定术;股骨植骨术
139	O106创伤骨科	2025-03-03	2025-03-09	3614290	谢春满	女	49Y	取除骨折内固定装置	下肢静脉肌间血栓形成	其他	翁益民	翁益民	蔡乐益	胫骨内固定装置去除术;皮肤瘢痕切除术
140	O106创伤骨科	2025-02-27	2025-03-11	3615382	赵庆设	男	75Y	手术后切口感染	趾骨骨折;高血压;2型糖尿病;胆囊结石;脾大;前列腺结石;下肢动脉粥样硬化;下肢静脉肌间血栓形成;肺气肿;肺诊断性影像检查的异常所见;乙肝表面抗原携带者	好转	石成弟	项光恒	蔡海丰
141	O106创伤骨科	2025-04-03	2025-04-16	3630678	董碎媛	女	88Y	股骨远端骨折	下肢静脉血栓形成;肺部感染;胆囊结石;后天性肾囊肿;肺肿物;膝关节积液;肝回声不均;退行性主动脉瓣疾患;主动脉(瓣)关闭不全;超声心动图异常;膝关节退行性病变	好转	水小龙	水小龙	王贤亮	股骨骨折切开复位钢板内固定术;股骨植骨术
142	O106创伤骨科	2025-04-11	2025-04-21	3633093	王老八	男	57Y	开放性胫腓骨干骨折	尺骨冠突骨折;小腿前部肌群肌腱损伤;上肢韧带损伤;老年性脑萎缩;主动脉钙化;前列腺钙化灶;肾结石;前列腺结石;下肢静脉曲张;下肢静脉血栓形成;肘关节积液;冠状循环诊断性影像检查异常所见;超声心动图异常;肱骨内髁骨折;肱骨外髁骨折;清创术后	好转	水小龙	水小龙	王贤亮	胫骨骨折切开复位钢板内固定术;腓骨骨折闭合复位髓内针内固定术;胫前肌腱修补术;胫骨植骨术;肘关节韧带修补术;石膏托固定术
143	O106创伤骨科	2025-04-08	2025-04-24	3634756	吴三英	女	63Y	股骨颈骨折	骨质疏松;肝回声不均;下腔静脉血栓形成;主动脉瓣关闭不全;下肢静脉血栓形成	好转	翁益民	翁益民	蔡乐益	全髋关节置换;股骨植骨术;髋轴面，陶瓷与聚乙烯
144	O106创伤骨科	2025-04-26	2025-05-05	3639388	郑爱蕊	女	82Y	股骨颈骨折	特发性(原发性)高血压;2型糖尿病;肺大疱;退行性主动脉瓣疾患;胆囊息肉;下肢静脉肌间血栓形成;肺诊断性影像检查的异常所见;主动脉(瓣)关闭不全;超声心动图异常	治愈	赵友明	张秀孟	张秀孟	全髋关节置换;髋关节滑膜切除术;髋轴面，陶瓷与聚乙烯
145	O106创伤骨科	2025-04-26	2025-05-13	3643053	程学成	男	54Y	股骨粗隆间骨折	跟骨骨折;尺骨鹰嘴骨折;耻骨骨折;距骨骨软骨损伤;下肢静脉血栓形成;肺大疱;主动脉钙化;冠状动脉粥样硬化;肝回声不均	好转	孔建中	余贤斌	余贤斌	股骨骨折闭合复位髓内针内固定术;下腔静脉滤器置入术;跟骨骨折切开复位钢板内固定术;尺骨骨折切开复位内固定术;股静脉穿刺术;筋膜成形术;股骨植骨术;跟骨植骨术
146	O106创伤骨科	2025-04-28	2025-05-21	3647705	卢贤洪	男	71Y	胫骨平台骨折	股骨内髁骨折;腰椎骨折;骶骨骨折;髋臼骨折;髂骨骨折;耻骨分支骨折;腹膜后血肿;支气管扩张伴感染;心房肥大;肝回声不均;脾钙化;肾结石;下肢静脉肌间血栓形成;头皮血肿;退行性主动脉瓣疾患;二尖瓣反流;肝钙化灶;下肢动脉粥样硬化;清创术后;髋关节置换术后	治愈	王鉴顺	王鉴顺	汪吉棋	胫骨骨折切开复位钢板内固定术;胫骨人工骨植骨术;副韧带修补术;石膏绷带固定
147	O106创伤骨科	2025-05-24	2025-06-02	3652979	陈爱花	女	79Y	股骨颈骨折	特发性(原发性)高血压;陈旧性脑梗死;下肢静脉肌间血栓形成;脂肪肝;胆囊结石;2型糖尿病	治愈	王鉴顺	王鉴顺	白炳力	人工股骨头置换术;髋关节滑膜切除术;髋轴面，陶瓷与聚乙烯
148	O106创伤骨科	2025-05-25	2025-06-04	3653941	邹荣建	男	52Y	股骨颈骨折	肺诊断性影像检查的异常所见;肺大疱;脂肪肝;前列腺增生;下肢静脉肌间血栓形成;心室肥大;超声心动图异常	治愈	水小龙	水小龙	汪吉棋	股骨骨折闭合复位钢针内固定术
149	O106创伤骨科	2025-05-26	2025-06-07	3655159	黄敬全	男	50Y	股骨干骨折	下肢静脉血栓形成	治愈	孔建中	郑亦静	郑亦静	股骨骨折闭合复位髓内针内固定术;股骨干骨折手法整复术
150	O106创伤骨科	2025-05-30	2025-06-09	3656372	陈春花	女	72Y	髋臼骨折	耻骨骨折;骶骨骨折;脑挫伤;肾结石;后天性肾囊肿;上颌窦炎;盆腔积液;特发性(原发性)高血压;下肢静脉肌间血栓形成;腔隙性脑梗死;低色素性贫血;清创术后	好转	翁益民	翁益民	项光恒	盆骨外固定术;应用单平面外固定架
151	O106创伤骨科	2025-06-06	2025-06-12	3658092	周爱珍	女	72Y	肱骨髁上骨折	高血压;糖尿病;高脂血症;睡眠障碍;乳腺术后;多发性肝囊肿;脂肪肝;后天性肾囊肿;下肢动脉粥样硬化;下肢静脉血栓形成;主动脉钙化	治愈	孔建中	郑亦静	郑亦静	肱骨骨折切开复位钢板内固定术;肱骨植骨术;筋膜成形术
152	O106创伤骨科	2025-06-25	2025-06-27	3664688	杨勇芝	女	48Y	取除骨折内固定装置	老年性心脏病;下肢静脉血栓形成;脑出血个人史	其他	水小龙	水小龙	汪吉棋	骨盆内固定装置去除术
153	O107创伤骨科	2024-11-25	2025-01-11	3590411	郑忠孝	男	46Y	骨盆骨折	跟骨骨折;足舟骨骨折;胸椎骨折;颈椎横突骨折;脊椎退行性病变;肋骨骨折;液气胸;创伤性湿肺;下肢深静脉血栓形成;脂肪肝;头皮血肿	治愈	汤骏	汤骏	汪吉棋	骨盆骨折闭合复位内固定术;髂动脉栓塞术;髂动脉造影;胸椎骨折切开复位内固定术;颅骨牵引术;下腔静脉支架置入术;下肢静脉造影;跟骨植骨术;关节软骨修复术;跟骨植骨术
154	O107创伤骨科	2025-01-12	2025-01-22	3595174	章德亮	男	74Y	股骨颈骨折	高血压;下肢静脉血栓形成;糖尿病;老年性心脏瓣膜病;肺部感染;腔隙性脑梗死	好转	杨雷	方文来	谢忠杰	人工股骨头置换术;关节滑膜切除术
155	O107创伤骨科	2025-01-18	2025-01-23	3595916	张凤香	女	86Y	骨质疏松伴有病理性骨折，其他的	胸椎骨折;陈旧性腰椎骨折;脊柱侧弯;胸椎后凸;骨质疏松;肺动脉高压中度;老年性心脏瓣膜病;后天性肾囊肿;下肢动脉粥样硬化;下肢静脉肌间血栓形成	治愈	武垚森	武垚森	武垚森	胸椎骨折球囊扩张成形术;椎骨活组织检查
156	O107创伤骨科	2025-01-18	2025-01-25	3596485	石爱华	女	71Y	股骨粗隆间骨折	高血压;下肢静脉血栓形成;脂肪肝;胆囊息肉;后天性肾囊肿;糖尿病	治愈	潘骏	潘骏	潘骏	股骨骨折闭合复位髓内针内固定术
157	O107创伤骨科	2025-01-06	2025-01-31	3599368	叶爱芬	女	52Y	骨盆骨折	颈椎间盘突出;创伤性蛛网膜下腔出血;胆囊息肉;静脉血栓形成;外踝骨折;下肢静脉血栓形成;肺诊断性影像异常;膝关节积液;肝占位性病变	好转	赵友明	赵友明	胡炜	骨盆骨折切开复位钢针内固定术;髂动脉栓塞术;髂动脉造影;踝关节骨折切开复位钢板内固定术
158	O107创伤骨科	2025-02-03	2025-02-16	3606111	吴爱兰	女	75Y	股骨颈骨折	肺诊断性影像异常;创伤性胸腔积液;肾结石;下肢静脉血栓形成	好转	杨雷	方文来	谢忠杰	人工股骨头置换术;下腔静脉滤器置入术;髋关节滑膜切除术
159	O107创伤骨科	2025-02-10	2025-02-19	3606844	连正喜	男	81Y	股骨颈骨折	下肢动脉硬化闭塞症;下肢静脉肌间血栓形成;肝血管瘤;前列腺增生;肋骨骨折;肺结节病;冠状动脉粥样硬化	治愈	潘骏	潘骏	潘骏	人工股骨头置换术;髋关节滑膜切除术
160	O107创伤骨科	2025-02-14	2025-02-20	3607291	张伏莲	女	84Y	股骨粗隆间骨折	心功能不全;肋骨骨折;肺诊断性影像异常;冠状动脉粥样硬化;下肢静脉血栓形成;主动脉瓣关闭不全	好转	陈龙	陈龙	卢迪	股骨骨折闭合复位髓内针内固定术;股骨颈/股骨转子间骨折手法整复术
161	O107创伤骨科	2025-02-18	2025-02-27	3610206	胡义琴	男	92Y	股骨颈骨折	前列腺增生;下肢静脉血栓形成;腮腺区肿物;主动脉(瓣)关闭不全;二尖瓣反流;心功能不全;前列腺结石	治愈	汤骏	汤骏	汪吉棋	人工股骨头置换术;髋关节滑膜切除术
162	O107创伤骨科	2025-03-02	2025-03-10	3614779	奚美玉	女	74Y	腰椎骨折L4	原发性单侧膝关节病;高血压;糖尿病;肺部感染;主动脉钙化;胆囊结石;腰椎间盘突出;下肢静脉血栓形成;室间隔肥大;退行性主动脉瓣疾患;心功能不全	治愈	陈龙	金海东	荣宇西	腰椎骨折球囊扩张成形术
163	O107创伤骨科	2025-03-03	2025-03-12	3615896	陈柳叶	女	80Y	跟骨骨折	肋骨骨折;肺诊断性影像异常;老年性心脏瓣膜病;后天性肾囊肿;下肢动脉粥样硬化;下肢深静脉血栓形成	好转	杨雷	卢晓郎	谢忠杰	跟骨骨折切开复位术;跟骨植骨术;关节滑膜切除术
164	O107创伤骨科	2025-03-10	2025-03-12	3615937	项水华	男	58Y	取除骨折内固定装置	高血压;肝硬化;胆囊息肉;肾积水伴肾结石;前列腺结石;下肢动脉粥样硬化;下肢静脉血栓形成	其他	陈龙	金海东	金海东	胫骨外固定装置去除术
165	O107创伤骨科	2025-03-15	2025-03-24	3620959	吕芹妹	女	83Y	股骨粗隆间骨折	头皮血肿;创伤性蛛网膜下出血;老年性脑萎缩;高血压;脑梗死个人史;下肢深静脉血栓形成;肝囊肿;后天性肾囊肿;阑尾术后	治愈	杨雷	卢晓郎	谢忠杰	股骨植骨术;股骨骨折闭合复位髓内针内固定术
166	O107创伤骨科	2025-03-17	2025-03-27	3622178	纪立前	男	78Y	骨盆骨折	下肢静脉血栓形成;肺诊断性影像异常;肺大疱;多发性肝囊肿;后天性肾囊肿;前列腺增生;退行性主动脉瓣疾患;心功能不全	治愈	陈龙	金海东	金海东	骨盆骨折切开复位钢针内固定术
167	O107创伤骨科	2025-04-09	2025-04-13	3629334	叶美娟	女	68Y	取除骨折内固定装置	胆囊息肉;肾错构瘤;下肢静脉血栓形成;特发性肺纤维化	其他	冯永增	冯永增	陈春慧	髌骨内固定装置去除术
168	O107创伤骨科	2025-04-03	2025-04-14	3629816	朱细茶	女	88Y	股骨颈骨折	特发性(原发性)高血压;2型糖尿病;肺诊断性影像异常;后天性肾囊肿;肝回声不均;下肢静脉血栓形成	治愈	冯永增	冯永增	陈春慧	人工股骨头置换术;髋关节滑膜切除术
169	O107创伤骨科	2025-04-16	2025-04-26	3635513	叶银娣	女	83Y	股骨颈骨折	原发性单侧膝关节病;胆囊息肉;下肢静脉肌间血栓形成;高血压;退行性主动脉瓣疾患;二尖瓣反流;心功能不全	治愈	陈龙	金海东	金海东	人工股骨头置换术;髋关节滑膜切除术
170	O107创伤骨科	2025-04-20	2025-04-30	3637393	王冬娇	女	70Y	股骨颈骨折	下肢动脉粥样硬化;下肢静脉肌间血栓形成;退行性主动脉瓣疾患;心功能不全	治愈	陈龙	金海东	金海东	全髋关节置换;髋关节滑膜切除术;髋轴面，陶瓷与聚乙烯
171	O107创伤骨科	2025-04-27	2025-05-05	3639402	林叶金	男	88Y	股骨颈骨折	胸椎骨折T11/T12;肋骨骨折;痴呆;后天性肾囊肿;肾结石;室间隔肥大;退行性主动脉瓣疾患;下肢动脉粥样硬化;下肢静脉肌间血栓形成;主动脉(瓣)关闭不全	治愈	陈龙	金海东	金海东	人工股骨头置换术;髋关节滑膜切除术;髋轴面，金属与聚乙烯
172	O107创伤骨科	2025-05-24	2025-05-31	3651930	黄林仁	男	68Y	锁骨骨折	肋骨骨折;半月板撕裂，近期的;膝关节外侧副韧带部分断裂;陈旧性肺结核;下肢静脉血栓形成;足挫伤	治愈	冯永增	冯永增	陈春慧	锁骨骨折切开复位内固定术;锁骨植骨术
173	O107创伤骨科	2025-06-07	2025-06-13	3658522	谭晓涛	男	45Y	外踝骨折	胆囊结石;前列腺结石;下肢静脉血栓形成;肩关节积液	好转	杨雷	胡炜	胡炜	踝关节骨折切开复位钢板内固定术;骨移植术
174	O107创伤骨科	2025-06-15	2025-06-21	3661763	陈爱女	女	58Y	胫腓骨闭合性骨折	高血压;脂肪肝;下肢静脉血栓形成	好转	潘骏	潘骏	卢迪	胫骨骨折切开复位髓内针内固定术;胫骨骨折闭合性复位术
175	O107创伤骨科	2025-06-14	2025-06-21	3661904	吴春兰	女	72Y	股骨粗隆间骨折	高血压;下肢深静脉血栓形成;肺肿物;陈旧性肋骨骨折	好转	杨雷	胡炜	胡炜	股骨骨折闭合复位髓内针内固定术
176	O107创伤骨科	2025-05-04	2025-06-22	3662073	叶凌善	女	62Y	肱骨近端骨折	下肢皮肤套脱伤;开放性胫腓骨下端骨折;下肢皮肤缺损;胫后神经损伤;跟骨骨折;肺肿物;胸腔积液;主动脉钙化;肝钙化灶;下肢静脉血栓形成	好转	杨雷	胡炜	胡炜	肱骨骨折切开复位术;软组织病损切除术;胫骨外固定术;关节滑膜切除术;肱骨植骨术;同种皮片移植术;肩袖修补术
177	O107创伤骨科	2025-06-14	2025-06-28	3665158	钟云本	男	54Y	三踝骨折	肝囊肿;后天性肾囊肿;下肢静脉肌间血栓形成;肺诊断性影像异常	好转	杨雷	胡炜	胡炜	踝关节骨折切开复位钢板内固定术;踝关节修补术
178	O108创伤骨科	2024-12-30	2025-01-11	3590526	李景玉	女	77Y	肱骨近端骨折	肋骨多处骨折;肩关节脱位;肩袖损伤;肺肿物;肾盂积水，其他的;下肢静脉血栓形成	好转	孙辽军	孙辽军	郑文浩	肱骨骨折切开复位钢板内固定术;关节软骨修复术;肱骨人工骨植骨术;肩袖修补术;肩关节滑膜切除术
179	O108创伤骨科	2025-01-10	2025-01-18	3593569	麻金元	男	73Y	股骨颈骨折	下肢静脉肌间血栓形成;胆囊结石;后天性肾囊肿	治愈	黄俊武	张秀孟	张秀孟	人工股骨头置换术;髋关节滑膜切除术;髋轴面，陶瓷与陶瓷
180	O108创伤骨科	2025-01-12	2025-01-20	3594243	郭唐妹	女	98Y	股骨粗隆间骨折	特发性(原发性)高血压;心房颤动;完全性右束支传导阻滞;Q-T间期延长;心功能不全;肝回声不均;双侧小肾;下肢深静脉血栓形成	治愈	陈华	吴剑彬	吴剑彬	股骨骨折闭合复位髓内针内固定术;下腔静脉滤器置入术
181	O108创伤骨科	2025-01-09	2025-01-20	3594265	邵良雄	男	65Y	开放性内踝骨折	腓骨骨折;距骨骨折;足挫伤;下肢静脉肌间血栓形成;肺肿物;肺部感染;后天性肾囊肿	治愈	黄义星	黄义星	郭伟军	踝关节骨折切开复位钢针内固定术;腓骨骨折切开复位钢板内固定术;腓骨人工骨植骨术;关节软骨修复术;创面封闭式负压引流术（VSD);皮肤和皮下坏死组织切除清创术;创面封闭式负压引流术（VSD)
182	O108创伤骨科	2025-01-24	2025-02-01	3599581	章春娇	女	76Y	股骨颈骨折	骨质疏松;下肢静脉血栓形成;下肢动脉粥样硬化闭塞症;肝囊肿	好转	孙辽军	孙辽军	郑文浩	人工股骨头置换术;髋轴面，陶瓷与聚乙烯;髋关节滑膜切除术
183	O108创伤骨科	2025-01-26	2025-02-02	3600110	孙招弟	女	61Y	耻骨骨折	高血压;下肢静脉肌间血栓形成;心功能不全;肺肿物	好转	陈华	陈华	吴剑彬
184	O108创伤骨科	2025-01-11	2025-02-08	3603531	王小华	女	60Y	创伤后伤口感染	2型糖尿病;胸腔积液;肋骨多处骨折;肾结石;下肢静脉血栓形成;胆囊息肉;后天性肾囊肿;心功能不全;二尖瓣反流	治愈	陈华	陈华	吴剑彬	皮肤和皮下坏死组织切除清创术;皮肤和皮下坏死组织切除清创术;中厚皮片移植术;创面封闭式负压引流术（VSD)
185	O108创伤骨科	2025-02-18	2025-02-26	3609956	杨玉花	女	89Y	股骨颈骨折	主动脉(瓣)关闭不全;心功能不全;胆囊结石;后天性肾囊肿;下肢静脉血栓形成	治愈	赵友明	赵友明	胡炜	人工股骨头置换术;髋轴面，金属与聚乙烯
186	O108创伤骨科	2025-02-18	2025-03-01	3610987	杨立花	女	88Y	股骨颈骨折	骨折术后;主动脉(瓣)关闭不全;肝回声不均;下肢静脉血栓形成	好转	陈华	陈墨川	陈墨川	人工股骨头置换术;髋关节滑膜切除术;髋轴面，陶瓷与聚乙烯
187	O108创伤骨科	2025-03-21	2025-04-01	3624268	林下梅	女	57Y	踝关节骨折	在踝和足水平的韧带破裂;高血压;2型糖尿病;下肢静脉肌间血栓形成;脂肪肝;肺肿物;子宫术后	治愈	黄俊武	黄俊武	吴剑彬	踝关节骨折切开复位钢板内固定术;腓骨人工骨植骨术;踝关节韧带修补术
188	O108创伤骨科	2025-03-27	2025-04-03	3625599	王碎香	女	85Y	股骨粗隆下骨折	骨质疏松;高血压;冠状动脉粥样硬化性心脏病;后天性肾囊肿;二尖瓣反流;主动脉(瓣)关闭不全;下肢动脉粥样硬化;下肢静脉血栓形成	治愈	黄俊武	吴剑彬	吴剑彬	股骨骨折切开复位髓内针内固定术;筋膜成形术
189	O108创伤骨科	2025-04-01	2025-04-06	3626208	马彩玉	女	70Y	股骨粗隆间骨折	骨质疏松;下肢静脉血栓形成;肺肿物	治愈	赵友明	赵友明	施方灵	股骨骨折闭合复位髓内针内固定术;股骨粗隆间截骨术;股骨人工骨植骨术;股骨颈/股骨转子间骨折手法整复术
190	O108创伤骨科	2025-03-27	2025-04-07	3626652	钱昭党	男	57Y	胫骨平台伴腓骨骨折	胫骨干骨折伴腓骨骨折;高血压;前列腺增生;下肢动脉粥样硬化;下肢静脉肌间血栓形成;前列腺结石	治愈	黄俊武	黄俊武	吴剑彬	胫骨骨折切开复位钢板内固定术;筋膜成形术
191	O108创伤骨科	2025-04-06	2025-04-13	3629398	陈军	男	53Y	取除骨折内固定装置	肝囊肿;下肢静脉肌间血栓形成;肺部感染	其他	陈华	罗鹏	罗鹏	跟骨内固定物取出术
192	O108创伤骨科	2025-03-17	2025-04-20	3632746	胡素芬	女	54Y	多发性骨盆骨折	骶骨骨折;髂骨骨折;耻骨骨折;髋臼骨折;肱骨近端骨折;肩胛骨骨折;颞骨骨折;腰椎骨折;肩关节脱位;失血性休克;头皮血肿;开放性面部损伤;肋骨多处骨折;胸腔积液;下肢静脉血栓形成;肝病;胆囊息肉	好转	孙辽军	孙辽军	郑文浩	髂动脉栓塞术;盆骨外固定术;皮肤和皮下组织非切除性清创;外部固定装置应用，单相系统;肱骨骨折切开复位钢针内固定术;关节软骨修复术;肱骨人工骨植骨术;肩袖修补术;肩胛骨骨折切开复位钢板内固定术;筋膜成形术;肩锁关节脱位切开复位术;骨盆外固定装置去除术
193	O108创伤骨科	2025-04-25	2025-04-28	3636225	杨步华	男	78Y	股骨颈骨折	下肢静脉曲张;下肢静脉血栓形成;前列腺结石;下肢动脉粥样硬化	好转	黄俊武	黄俊武	吴剑彬
194	O108创伤骨科	2025-04-30	2025-05-10	3641956	赖玉莲	女	89Y	股骨颈骨折	髋关节退行性病变;腹腔积液;膝关节退行性病变;特发性(原发性)高血压;肺部感染;胸腔积液;下肢静脉血栓形成	治愈	黄义星	黄义星	汤嘉豪	人工股骨头置换术;髋关节滑膜切除术;髋轴面，陶瓷与陶瓷
195	O108创伤骨科	2025-04-27	2025-05-15	3644470	陈金飞	女	51Y	腰椎骨折L4	股骨骨折;腓骨骨折;肋骨多处骨折;胸腔积液;腰椎间盘突出;腰椎退行性病变;肺肿物;肝囊肿;心功能不全;肝回声不均;下肢静脉血栓形成	治愈	赵友明	张秀孟	张秀孟	腰椎骨折切开复位内固定术;股骨骨折切开复位钢板内固定术;股骨人工骨植骨术
196	O108创伤骨科	2025-05-22	2025-06-02	3652939	王可生	男	69Y	股骨粗隆下骨折	股骨干骨折;股骨粗隆间骨折;冠状动脉粥样硬化性心脏病;脂肪肝;下肢静脉血栓形成	治愈	赵友明	吴剑彬	吴剑彬	股骨骨折闭合复位髓内针内固定术
197	O109创伤骨科	2024-12-23	2025-01-03	3587509	郑继督	男	63Y	股骨颈骨折	头部的损伤;创伤性硬膜下出血;颅骨和面骨多发性骨折;脑挫伤;创伤性颅内积气;创伤性蛛网膜下出血;高血压;肝囊肿;肾结石;前列腺增生;前列腺结石;下肢静脉肌间血栓形成;肺大疱;主动脉钙化;肝回声不均	治愈	冯永增	冯永增	徐宏威	全髋关节置换;髋轴面，陶瓷与金属;髋关节滑膜切除术
198	O109创伤骨科	2024-12-24	2025-01-07	3589029	黄桃花	女	82Y	原发性单侧膝关节病	股骨粗隆间骨折;下肢动脉粥样硬化;高血压;2型糖尿病;痛风;后天性肾囊肿;肺诊断性影像检查的异常所见;退行性主动脉瓣疾患;二尖瓣退行性变;二尖瓣反流;心功能不全;下肢静脉肌间血栓形成	治愈	洪建军	卢晓郎	卢晓郎	全部膝关节置换;膝关节滑膜切除术;膝关节松解术
199	O109创伤骨科	2025-01-02	2025-01-15	3592293	张茂英	女	54Y	股骨颈骨折	骨折术后;髋关节置换术后;腰椎间盘突出;陈旧性肋骨骨折;下肢静脉血栓形成;后天性肾囊肿;肾结石	治愈	洪建军	卢晓郎	卢晓郎	全髋关节置换;髋关节滑膜切除术;髋轴面，陶瓷与聚乙烯
200	O109创伤骨科	2025-02-06	2025-03-08	3614153	马记林	男	60Y	距骨骨折	跖骨基底骨折;距舟关节脱位;坏疽，不可归类在他处者;胫骨骨折累及踝关节;跗跖关节脱位;足舟骨脱位;腰椎间盘突出;下肢静脉肌间血栓形成;退行性主动脉瓣疾患;下肢动脉粥样硬化;主动脉(瓣)关闭不全	治愈	余可和	余可和	郭伟军	踝关节骨折切开复位钢板内固定术;跖骨骨折切开复位钢板内固定术;距骨骨折切开复位钢板内固定术;距骨人工骨植骨术;踝关节骨折切开复位钢板内固定术;胫骨楔形截骨术;关节软骨修复术;创面封闭式负压引流术（VSD);创面封闭式负压引流术（VSD)
201	O109创伤骨科	2025-03-10	2025-03-18	3618240	侯冬娥	女	69Y	胫骨平台骨折	肝回声不均;下肢静脉血栓形成;肺诊断性影像检查的异常所见;超声心动图异常	治愈	冯永增	冯永增	陈春慧	胫骨骨折切开复位钢板内固定术;胫骨人工骨植骨术
202	O109创伤骨科	2025-04-14	2025-04-22	3633678	翁夏焦	女	72Y	股骨粗隆间骨折	高血压;糖尿病;下肢静脉血栓形成;脂肪肝;肾结石;后天性肾囊肿;主动脉钙化;胸腔积液;老年性心脏病;频发性室性期前收缩;十二指肠憩室	治愈	周一飞	周一飞	翁摄稷	股骨骨折闭合性复位术不伴内固定;股骨人工骨植骨术;股骨外固定术;外部固定装置应用，单相系统
203	O109创伤骨科	2025-04-22	2025-04-29	3636793	潘银平	女	70Y	胫骨结节骨折	假体周围骨折;人工关节术后;骨质疏松;高血压;糖尿病;下肢静脉血栓形成;脂肪肝;肺钙化;特发性肺纤维化;淋巴结钙化;主动脉钙化;老年性心脏病	治愈	周一飞	周一飞	翁摄稷	胫骨骨折切开复位钢板内固定术;胫骨人工骨植骨术
204	O109创伤骨科	2025-04-06	2025-05-08	3641226	周松涛	男	60Y	踝关节骨折	踝关节脱位;三角韧带断裂;Lisfranc损伤;开放性足损伤;下肢软组织感染;下肢静脉血栓形成	治愈	余可和	余可和	郭伟军	皮肤和皮下坏死组织切除清创术;创面封闭式负压引流术（VSD);踝关节骨折切开复位术;皮肤和皮下坏死组织切除清创术;踝关节骨折切开复位钢板内固定术;距骨植骨术;创面封闭式负压引流术（VSD);踝关节韧带缝合术;跖跗关节脱位切开复位术;创面封闭式负压引流术（VSD)
205	O109创伤骨科	2025-05-17	2025-05-25	3649296	李小玉	男	85Y	股骨颈骨折	心力衰竭;肺气肿;支气管扩张(症);主动脉钙化;肝钙化灶;下肢静脉血栓形成	治愈	赵友明	赵友明	施方灵	人工双动股骨头置换术;髋关节滑膜切除术;髋轴面，陶瓷与聚乙烯
206	O109创伤骨科	2025-05-20	2025-05-31	3652343	程阿花	女	82Y	股骨粗隆间骨折	高血压;肺部感染;2型糖尿病;骨质疏松;胆囊术后;下肢深静脉血栓形成;后天性肾囊肿	好转	杨雷	卢晓郎	谢忠杰	股骨骨折闭合复位髓内针内固定术
207	O109创伤骨科	2025-05-26	2025-06-04	3653885	杨昌丙	男	52Y	胫腓骨闭合性骨折	下肢静脉肌间血栓形成	好转	陈华	蔡乐益	蔡乐益	胫骨骨折切开复位钢板内固定术
208	O109创伤骨科	2025-05-27	2025-06-12	3658081	郭玉兰	女	68Y	股骨髁间骨折	下肢静脉血栓形成;高血压;脑术后;甲状腺术后;阑尾术后;肾盂积水，其他的;肾结石;心功能不全;输尿管扩张;骨质疏松	好转	陈华	蔡乐益	蔡乐益	股骨骨折切开复位钢板内固定术;下腔静脉滤器置入术
209	O109创伤骨科	2025-05-29	2025-06-13	3658597	项友妹	女	73Y	Lisfranc损伤	肾挫伤;胸腔积液;下肢静脉肌间血栓形成;脂肪肝;肝囊肿;肝钙化灶;骨折术后;清创术后;胆囊结石;肾盂积水，其他的;老年性心脏病;肺诊断性影像检查的异常所见;心房颤动;高血压	治愈	洪建军	卢晓郎	卢晓郎	跖骨骨折切开复位钢板内固定术
210	O109创伤骨科	2025-06-12	2025-06-22	3662329	周爱玉	女	75Y	股骨粗隆间骨折	高血压;泌尿道感染;肝囊肿;心功能不全;肺气肿;下肢静脉肌间血栓形成;炎症后肺纤维化;主动脉钙化;重度骨质疏松	好转	陈龙	陈龙	王特	股骨骨折闭合复位髓内针内固定术
211	O110关节外科	2025-01-03	2025-01-09	3590004	吴秀莲	女	87Y	股骨粗隆间骨折	高血压;糖尿病;单纯性肾囊肿;下肢静脉血栓形成	治愈	赵友明	赵友明	胡炜	股骨骨折闭合复位髓内针内固定术
212	O110运动医学科	2025-02-28	2025-03-05	3612794	施春妹	女	59Y	膝关节前十字韧带损伤	胫骨平台骨折;膝关节内侧副韧带损伤;桡骨远端骨折;肩撞击综合征;冈上肌肌腱损伤;肩关节积液;下肢动脉粥样硬化;胆囊息肉;下腔静脉血栓形成;副脾;肾结石;老年性心脏病	治愈	胡月正	许心弦	余炜	关节镜膝关节前交叉韧带重建术;关节镜膝关节滑膜切除术;异体肌腱移植术
213	O110运动医学科	2025-04-08	2025-04-14	3629731	全崇兰	女	57Y	外踝骨折	跖骨骨折;趾骨骨折;下肢静脉血栓形成;脂肪肝;胆囊结石	治愈	冯永增	冯永增	陈春慧	踝关节骨折切开复位钢针内固定术;跖骨骨折切开复位钢板内固定术
214	O110运动医学科	2025-04-08	2025-04-17	3631280	章彩华	女	56Y	胫骨平台骨折	下肢静脉肌间血栓形成;脂肪肝;主动脉硬化	治愈	陈华	罗鹏	罗鹏	胫骨骨折切开复位钢板内固定术;胫骨人工骨植骨术;膝关节的其他修补术
215	O110运动医学科	2025-05-05	2025-05-14	3643078	金彩华	女	66Y	股骨粗隆间骨折	脂肪肝;下肢静脉血栓形成;坠积性肺炎	治愈	赵友明	赵友明	施方灵	股骨骨折闭合复位髓内针内固定术
216	O110运动医学科	2025-05-04	2025-05-14	3643778	李春生	女	70Y	股骨颈骨折	肺肿物;胸腔积液;主动脉钙化;肝囊肿;后天性肾囊肿;下肢动脉粥样硬化;下肢静脉血栓形成	治愈	潘孝云	许心弦	余炜	全髋关节置换;髋轴面，陶瓷与陶瓷;髋关节滑膜切除术
217	O110运动医学科	2025-05-05	2025-05-16	3644926	梅荣光	男	68Y	股骨粗隆间骨折	下肢静脉血栓形成;心功能不全;肝囊肿;胆囊息肉;肺肿物	好转	孔建中	余贤斌	余贤斌	股骨骨折闭合复位螺钉内固定术;股骨人工骨植骨术
218	O110运动医学科	2025-05-24	2025-05-31	3652037	郑丐炉	男	72Y	尺骨茎突骨折伴桡骨远端骨折	后天性肾囊肿;前列腺增生;前列腺结石;下肢静脉血栓形成	治愈	潘孝云	许心弦	余炜	桡骨骨折切开复位钢板内固定术
219	O111关节外科	2025-01-14	2025-01-25	3596452	黄冬梅	女	80Y	肱骨髁上骨折	尺骨和桡骨下端均骨折;特发性(原发性)高血压;肝囊肿;后天性肾囊肿;下肢动脉粥样硬化;下肢静脉血栓形成;胸腔积液;主动脉钙化	好转	胡月正	许心弦	徐道亮	肱骨骨折切开复位钢板内固定术
220	O111关节外科	2025-01-17	2025-01-26	3596797	张柳妹	女	75Y	股骨粗隆间骨折	下肢静脉血栓形成;心功能不全;肝钙化灶;胆总管扩张	治愈	余洋	余洋	汤嘉豪	股骨骨折闭合复位螺钉内固定术;股骨人工骨植骨术
221	O111关节与骨病外科	2025-03-06	2025-03-17	3617774	张存宗	男	52Y	跟骨骨折	外踝骨折;下肢静脉血栓形成;胆囊息肉;脾大;后天性肾囊肿	治愈	赵友明	赵友明	施方灵	跟骨骨折切开复位钢板内固定术;跟骨人工骨植骨术;踝关节滑膜切除术
222	O111关节与骨病外科	2025-03-12	2025-03-20	3619329	林显姚	女	83Y	腰椎椎管狭窄	腰椎间盘突出;髂骨继发恶性肿瘤;高血压;脂肪肝;后天性肾囊肿;肋骨多处骨折;肺占位性病变;下肢静脉血栓形成	好转	成少安	成少安	李振兴	髂骨活检术;脊神经根阻滞术
223	O111关节与骨病外科	2025-03-29	2025-04-05	3626080	蒋学丹	男	86Y	股骨颈骨折	肺气肿;主动脉钙化;肺动脉高压;胸腔积液;后天性肾囊肿;前列腺增生;前列腺结石;下肢动脉粥样硬化;下肢静脉血栓形成	治愈	张宇	陈成旺	李振兴	髋轴面，陶瓷与聚乙烯;全髋关节置换;髋关节滑膜切除术
224	O111关节与骨病外科	2025-04-14	2025-04-22	3633468	方洪柳	女	90Y	股骨颈骨折	下肢动脉粥样硬化;下肢静脉血栓形成;肺部感染;支气管扩张(症);主动脉钙化	治愈	张宇	陈成旺	黄益奖	全髋关节置换;髋关节滑膜切除术;髋轴面，陶瓷与陶瓷
225	O111关节与骨病外科	2025-04-26	2025-05-05	3639438	卢伯春	男	63Y	胫骨平台骨折	膝半月板撕裂;2型糖尿病;脂肪肝;前列腺增生;前列腺结石;下肢静脉血栓形成	治愈	薛恩兴	陈亮2	林一木	胫骨骨折切开复位钢板内固定术;膝关节半月板成形术
226	O111关节与骨病外科	2025-04-28	2025-05-07	3640457	李阿英	女	83Y	骨折内固定物植入感染	高血压;肺部感染;肺气肿，其他的;肺肿物;主动脉钙化;胰腺钙化;肝囊肿;下肢动脉粥样硬化;下肢静脉血栓形成	好转	薛恩兴	陈亮2	林一木	股骨内固定装置去除术;下腔静脉滤器置入术;骨空隙骨水泥填充术
227	O111关节与骨病外科	2025-04-28	2025-05-07	3640460	周爱钗	女	92Y	股骨颈骨折	特发性(原发性)高血压;主动脉钙化;颈动脉硬化;下肢静脉血栓形成;后天性肾囊肿	治愈	张宇	陈成旺	黄益奖	髋轴面，陶瓷与聚乙烯;髋关节松解术;人工双动股骨头置换术
228	O111关节与骨病外科	2025-04-26	2025-05-07	3640468	管岩洪	男	85Y	股骨假体周围骨折	人工髋关节;孤立性肺结节;冠状动脉粥样硬化;主动脉钙化;下肢动脉粥样硬化;后天性肾囊肿;肺动脉高压;肾钙化;前列腺结石;二尖瓣及主动脉瓣关闭不全;下肢静脉曲张;下肢静脉血栓形成	治愈	薛恩兴	陈亮2	林一木	股骨骨折切开复位钢板内固定术
229	O111关节与骨病外科	2025-05-20	2025-05-29	3651341	刘磊	男	54Y	股骨干骨折	下肢静脉血栓形成;脂肪肝;肝钙化灶;胆囊息肉;前列腺增生;肺肿物;特发性肺纤维化	治愈	薛恩兴	陈亮2	林一木	股骨骨折切开复位髓内针内固定术;股骨植骨术
230	O111关节与骨病外科	2025-06-13	2025-06-19	3661087	吴尧森	男	93Y	股骨颈骨折	髋关节滑膜炎;2型糖尿病;胃术后;后天性肾囊肿;肾结石;膀胱炎;下肢静脉血栓形成;下肢动脉粥样硬化;下肢静脉曲张	治愈	薛恩兴	林一木	林一木	人工双动股骨头置换术;髋关节滑膜切除术;髋轴面，陶瓷与陶瓷
231	O111关节与骨病外科	2025-06-15	2025-06-30	3666189	金淑眉	女	86Y	股骨颈骨折	股骨头缺血性坏死;子宫钙化;心功能不全;下肢静脉肌间血栓形成;肾盂囊肿;肺大疱;肺的其他疾患;主动脉钙化;甲状腺钙化;冠状动脉粥样硬化	好转	张宇	陈成旺	李振兴	人工股骨头置换术;全髋关节置换;髋轴面，陶瓷与陶瓷;髋关节滑膜切除术
232	O204ICU	2024-12-29	2025-01-03	3587541	卓白燕	女	93Y	股骨粗隆间骨折	受压区压疮;2型糖尿病;慢性肾功能不全;低蛋白血症;中度贫血;肺大疱;肺诊断性影像检查的异常所见;后天性肾囊肿;下肢静脉肌间血栓形成	好转	程碧环	陈德准	陈德准	股骨骨折闭合复位螺钉内固定术
233	O204ICU	2025-01-19	2025-01-25	3596602	芦钗香	女	88Y	股骨粗隆间骨折	腹主动脉假性动脉瘤;髂内动脉夹层;左房扩大;心功能不全;下肢静脉血栓形成	治愈	程碧环	魏大臻	林国梁	股骨骨折闭合复位髓内针内固定术
234	O204ICU	2025-03-13	2025-03-30	3623435	包岩伍	男	93Y	股骨粗隆间骨折	胸腔积液;呼吸衰竭;脓毒血症;高乳酸血症;代谢性酸中毒;凝血功能障碍;下肢动脉粥样硬化;高血压;2型糖尿病;孤立性肺结节;前列腺增生;后天性肾囊肿;老年性心脏病;轻度肺动脉高压;心包积液;下肢静脉肌间血栓形成;前列腺结石;超声心动图异常	治愈	张晓隆	李忠旺	李忠旺	股骨骨折闭合复位髓内针内固定术;股骨植骨术;胸腔穿刺术
235	O204ICU	2025-03-24	2025-04-05	3625911	陈爱玉	女	88Y	股骨粗隆间骨折	急性心肌梗死;冠状动脉粥样硬化性心脏病;心包积液;下肢静脉肌间血栓形成	治愈	张晓隆	陈建时	陈建时	股骨骨折闭合复位髓内针内固定术;股骨人工骨植骨术
236	O204ICU	2025-04-07	2025-04-22	3633743	张彩珠	女	89Y	股骨粗隆间骨折	心功能不全;心房颤动;肺部感染;胸腔积液;下肢静脉肌间血栓形成;甲状腺结节;心房肥大;主动脉钙化;主动脉瓣钙化;冠状循环诊断性影像检查异常所见;心包积液;肺诊断性影像检查的异常所见;膝关节退行性病变	好转	张晓隆	谢媚媚	谢媚媚	股骨骨折闭合复位钢针内固定术;胸腔闭式引流术;胸腔闭式引流术
237	O204ICU	2025-04-16	2025-05-02	3638599	陈福银	男	85Y	股骨颈骨折	胸腔积液;慢性支气管炎急性加重期;支气管扩张伴感染;冠状动脉粥样硬化性心脏病;心功能不全;阵发性心房颤动;腹股沟斜疝;睾丸鞘膜积液;高血压;下肢动脉粥样硬化;下肢静脉肌间血栓形成;膀胱结石	治愈	张晓隆	李忠旺	李忠旺	人工股骨头置换术;颈内静脉穿刺中心静脉置管术;髋轴面，陶瓷与聚乙烯;髋关节松解术
238	O204ICU	2025-05-06	2025-05-26	3649970	周怀象	男	85Y	股骨继发恶性肿瘤	肿瘤性病理性骨折;肺恶性肿瘤;呼吸衰竭;肺部感染;支气管哮喘;下肢静脉肌间血栓形成;后天性肾囊肿;前列腺结石;阵发性心房颤动	治愈	张晓隆	陈如杰	陈如杰	股骨病损切除术;股骨骨折切开复位髓内针内固定术;心律电复律;呼吸机治疗[小于96小时];股骨颈/股骨转子间骨折手法整复术;股骨植骨术;气管内插管
239	O204ICU	2025-06-01	2025-06-15	3659334	周芳忠	男	75Y	股骨粗隆间骨折	肺部感染;下肢静脉肌间血栓形成;特发性(原发性)高血压;痛风;陈旧性肺结核;肾结石;清创术后;冠状动脉支架植入后状态	治愈	张晓隆	陈如杰	陈如杰	股骨骨折闭合复位髓内针内固定术
240	O205内外科病区	2024-12-25	2025-01-04	3587881	陈碎娟	女	91Y	股骨粗隆间骨折	下肢动脉粥样硬化;股静脉血栓形成;脑梗死;老年性脑萎缩;中度贫血;窦性心动过缓;房性期前收缩[房性早搏];低蛋白血症;脱髓鞘性脑病;脑缺血灶;脑软化灶	好转	程碧环	陈德准	陈德准	股骨骨折闭合复位髓内针内固定术
241	O205内外科病区	2024-12-15	2025-01-07	3589098	陈玉弟	女	81Y	桡骨干骨折	创伤性脾破裂;耻骨骨折;下肢深静脉血栓形成;高血压;髋部挫伤	治愈	邓应彬	周磊	周磊	桡骨骨折切开复位钢板内固定术;桡骨植骨术
242	O205内外科病区	2025-01-18	2025-01-21	3594984	颜桂兰	女	90Y	股骨粗隆间骨折	老年性心脏瓣膜病;急性肾功能不全;急性心力衰竭;冠状动脉粥样硬化性心脏病;高血压病1级（极高危）;下肢静脉肌间血栓形成;肝囊肿;后天性肾囊肿	未愈	程碧环	程碧环	胡建坚
243	O205内外科病区	2024-12-20	2025-01-25	3596628	娄宝娇	女	86Y	股骨颈骨折	腰椎骨折;高血压;泌尿道感染;盆腔肿物;下肢静脉肌间血栓形成;脂肪肝;后天性肾囊肿;肾结石	好转	程碧环	庄荣	庄荣	人工股骨头置换术;髋关节滑膜切除术
244	O205内外科病区	2025-01-27	2025-02-01	3599726	高銮仔	女	84Y	股骨粗隆间骨折	脊柱侧弯;肺大疱;膈疝;胆总管扩张;后天性肾囊肿;下肢静脉肌间血栓形成;泌尿器官诊断性影像检查的异常所见	治愈	黄俊武	黄俊武	张秀孟	股骨骨折闭合复位髓内针内固定术
245	O205内外科病区	2025-01-31	2025-02-07	3602966	林玉娟	女	64Y	桡骨远端骨折	肋骨多处骨折;下肢深静脉血栓形成;高血压	好转	赵友明	赵友明	胡炜	桡骨骨折切开复位钢板内固定术;石膏绷带固定
246	O205内外科病区	2025-01-26	2025-02-20	3607323	倪陈蜜	女	83Y	股骨颈骨折	泌尿道感染;低蛋白血症;胸腔积液;下肢静脉肌间血栓形成;老年性脑萎缩;肾结石;肺部阴影;甲状腺肿物;老年性心脏病;后天性肾囊肿;肾超声检查异常	治愈	张晓隆	庄荣	庄荣	人工股骨头置换术;髋轴面，金属与聚乙烯
247	O205内外科病区	2025-02-19	2025-02-26	3609869	厉莲英	女	87Y	股骨颈骨折	髋关节置换术后;下肢静脉肌间血栓形成;退行性主动脉瓣疾患;心功能不全;主动脉(瓣)关闭不全	治愈	黄俊武	黄俊武	张秀孟	髋关节滑膜切除术;肌再附着;人工股骨头置换术;髋轴面，金属与聚乙烯
248	O205内外科病区	2025-02-19	2025-03-02	3611429	毛瑞楣	男	89Y	股骨颈骨折	髋关节退行性病变;下肢静脉血栓形成;肝囊肿;后天性肾囊肿;前列腺增生;肺气肿;肺肿物;退行性主动脉瓣疾患;主动脉(瓣)关闭不全	治愈	黄俊武	吴剑彬	吴剑彬	人工股骨头置换术;下腔静脉滤器置入术;髋关节滑膜切除术;髋轴面，金属与聚乙烯
249	O205内外科病区	2025-02-23	2025-03-05	3612910	卢孔星	男	52Y	腰椎骨折L5	骨质疏松;急性不完全性四肢瘫;高血压;痛风性关节炎;库欣病;下肢静脉肌间血栓形成;后天性肾囊肿;肾结石;前列腺结石	好转	武垚森	武垚森	陈教想	腰椎骨折切开复位内固定术;经皮椎骨成形术
250	O205内外科病区	2025-02-23	2025-03-08	3613918	陈阿芹	男	68Y	胫骨干骨折伴腓骨骨折	骨折术后;高血压;陈旧性肋骨骨折;胆囊结石;胆囊息肉;后天性肾囊肿;前列腺增生;前列腺结石;下肢静脉血栓形成;纵隔阴影	治愈	黄俊武	吴剑彬	吴剑彬	胫骨骨折切开复位钢板内固定术;髂骨切除术用作移植物;胫骨植骨术
251	O205内外科病区	2025-03-31	2025-04-09	3627569	季福增	男	54Y	跖骨骨折	肩锁关节脱位;骰骨骨折;肩袖损伤;跟骨骨折;肱骨骨囊肿;高血压;痛风;脂肪肝;后天性肾囊肿;前列腺结石;下肢静脉肌间血栓形成	治愈	赵友明	赵友明	施方灵	肩锁关节修补术;肩锁关节脱位切开复位术;跖骨骨折切开复位钢针内固定术;骰骨骨折切开复位内固定术;关节滑膜切除术
252	O205内外科病区	2025-04-10	2025-04-17	3631352	杨保花	女	76Y	股骨粗隆间骨折	2型糖尿病;肺炎;肺中叶综合征;后天性肾囊肿;下肢静脉肌间血栓形成;超声心动图异常	治愈	冯永增	冯永增	陈春慧	股骨骨折闭合复位髓内针内固定术
253	O205内外科病区	2025-04-21	2025-05-08	3641167	张美蓉	女	89Y	骶尾区Ⅲ期压疮	足踝区Ⅱ期压疮;受压区Ⅱ期压疮;低色素性贫血;肺部感染;胸腔积液;低蛋白血症;老年性心脏病;下肢动脉粥样硬化;下肢静脉血栓形成;股骨骨折;后天性肾囊肿	治愈	张晓隆	李忠旺	李忠旺	超声引导下胸腔穿刺术
254	O205内外科病区	2025-05-19	2025-05-23	3648348	张国英	女	71Y	腰椎压缩性骨折	骨质疏松;高血压;腰椎间盘突出;肺肿物;下肢静脉肌间血栓形成	治愈	武垚森	武垚森	武垚森	腰椎骨折球囊扩张成形术;椎骨活组织检查;腰椎穿刺术
255	O205内外科病区	2025-06-02	2025-06-07	3655556	陈彩英	女	68Y	腰椎骨折L1	膝关节退行性病变;腰椎间盘突出;腰骶椎骨骨折;胸椎退行性病变;下肢静脉血栓形成	好转	倪文飞	朱思品	朱思品	腰椎骨折球囊扩张成形术
256	O205内外科病区	2025-06-10	2025-06-16	3659624	高文满	男	84Y	肿瘤性病理性骨折	骨继发恶性肿瘤;肺恶性肿瘤;肺术后;腰椎间盘突出;后天性肾囊肿;前列腺增生;前列腺结石;下肢动脉粥样硬化;下肢静脉血栓形成	好转	林仲可	林仲可	林仲可	腰椎骨折球囊扩张成形术;椎骨穿刺活组织检查;腰椎穿刺术
257	O205内外科病区	2025-06-22	2025-06-26	3664174	包兰英	女	81Y	腰椎压缩性骨折	骨质疏松;高血压;2型糖尿病;二尖瓣反流;胆囊结石;脂肪肝;下腔静脉血栓形成	好转	林焱	许聪	许聪	腰椎骨折球囊扩张成形术
258	O206疼痛科	2025-01-05	2025-01-09	3589979	黄菊花	女	78Y	骨质疏松伴有病理性骨折	肋骨骨折;偶发房室性期前收缩;下肢动脉粥样硬化;下肢静脉血栓形成	好转	占恭豪	占恭豪	刘世文
259	O206疼痛科	2025-01-31	2025-02-10	3605030	林秋舜	男	67Y	股骨粗隆间骨折	股骨粗隆下骨折;肺肿物;前列腺结石;静脉血栓形成	好转	孔建中	陈墨川	陈墨川	股骨骨折切开复位钢板内固定术;骨移植术;筋膜成形术
260	O206疼痛科	2025-03-17	2025-03-19	3618995	杨立花	女	88Y	髋关节脱位	髋关节置换术后;陈旧性股骨颈骨折;骨折术后;下肢静脉血栓形成;肝回声不均;主动脉瓣关闭不全;心律失常	治愈	陈华	陈墨川	陈墨川	髋关节脱位手法整复术
261	O206疼痛科	2025-03-28	2025-04-05	3626016	陈叶如	女	67Y	腰椎压缩性骨折	骨质疏松;腰椎术后;腰椎退行性病变;腰椎间盘突出;帕金森病;特发性(原发性)高血压;贫血;低钾血症;下肢静脉血栓形成;泌尿道感染	治愈	武垚森	武垚森	陈教想	腰椎骨折球囊扩张成形术
262	O206疼痛科	2025-04-22	2025-04-26	3635303	朱小兰	女	69Y	取除骨折内固定装置	2型糖尿病;下肢静脉肌间血栓形成;多发性肝囊肿;肾超声检查异常;肺大疱;主动脉瓣钙化;肺肿物	其他	陈华	罗鹏	罗鹏	髌骨内固定装置去除术
263	O206疼痛科	2025-05-08	2025-05-12	3642811	潘秀蕊	女	76Y	胸椎骨折T7/T8	胸椎骨折T11/T12;脊柱侧弯;骨质疏松;下肢静脉肌间血栓形成	治愈	黄俊武	黄俊武	吴剑彬	经皮穿刺脊柱后凸成形术
264	O206疼痛科	2025-05-29	2025-06-07	3655521	陈爱平	女	49Y	腰椎骨折L2	胸椎骨折T3/T4;颈椎间盘突出;肩胛骨骨折;胸骨骨折;头皮血肿;肺肿物;脂肪肝;胆囊息肉;后天性肾囊肿;下肢静脉血栓形成	好转	林焱	许聪	许聪	腰椎骨折切开复位内固定术;胸椎骨折切开复位内固定术
265	O207创面外科	2025-04-28	2025-05-10	3641634	陈海标	男	43Y	创伤性指动脉破裂	手指指神经损伤,其他的;手部拇指长屈肌腱损伤;开放性拇指骨折;掌指关节脱位;掌指和指间关节处的手指韧带创伤性破裂;手部拇指内在肌损伤;上肢动脉血栓形成;轻度贫血	治愈	李志杰	吴志鹏	周宗伟	动脉修补术;指骨骨折切开复位钢针内固定术;指骨人工骨植骨术;掌指关节脱位切开复位术;手部肌肉清创术;指神经缝合术;上肢动脉取栓术;指关节囊缝合术;屈指肌腱缝合术;石膏托固定术
266	O207创面外科	2025-05-05	2025-06-09	3656488	高绍济	男	56Y	开放性外踝骨折	足部套脱伤;踝开放性伤口;跟骨骨髓炎;高血压;肝囊肿;后天性肾囊肿;前列腺结石;下肢静脉血栓形成;大隐静脉曲张;肺肿物	好转	李志杰	李志杰	陈庭祥	皮肤和皮下坏死组织切除清创术;创面封闭式负压引流术（VSD);筋膜皮瓣移植术;踝关节骨折切开复位钢板内固定术;皮肤和皮下坏死组织切除清创术;创面封闭式负压引流术（VSD);皮肤和皮下坏死组织切除清创术;创面封闭式负压引流术（VSD);人工皮肤移植术
267	O207手外科	2024-12-25	2025-01-23	3595889	周德林	男	61Y	骨盆骨折	开放性尺骨桡骨远端骨折;腕部开放性损伤;腕关节脱位;髂骨骨折;耻骨骨折;三根肋骨骨折不伴第一肋骨骨折;液气胸;肺肿物;颈椎退行性病变;腰椎间盘突出;胸椎压缩性骨折;腰椎退行性病变;肾结石;后天性肾囊肿;前列腺钙化灶;多处挫伤;高血压;下肢静脉血栓形成	治愈	李志杰	周飞亚	罗祖程	骨盆骨折闭合复位内固定术;皮肤伤口切除性清创术;肌肉清创术;桡骨和尺骨骨折开放性复位术伴内固定;皮瓣预制术;盆骨外固定术;桡骨外固定术;应用组合外固定架系统;创面封闭式负压引流术（VSD);桡骨人工骨植骨术;水泥间隔物置入术;创面封闭式负压引流术（VSD)
268	O208手外科	2025-01-06	2025-01-21	3594776	潘彩娇	女	79Y	前臂开放性伤口	掌骨骨折;上颌窦骨折;肌腱和肌肉损伤;肋骨骨折;后天性肾囊肿;多发性脑梗死;老年性脑萎缩;胸腔积液;老年性心脏病;下肢静脉血栓形成;高血压	治愈	虞庆	陈一衡	陶振宇	全厚皮片移植术;筋膜皮瓣移植术;皮肤和皮下坏死组织切除清创术
269	O208手外科	2025-01-28	2025-02-08	3603618	金邦乾	男	68Y	股骨骨折	胫骨平台骨折;下肢静脉血栓形成;肌腱和肌肉损伤;膝关节积液;老年性关节炎;膝关节退行性病变;膝外侧半月板损伤;膝关节十字韧带损伤;膝关节副韧带损伤;腰椎退行性病变;腰椎间盘突出;后天性肾囊肿;前列腺增生;前列腺结石	治愈	陈龙	陈龙	卢迪	股骨骨折闭合复位髓内针内固定术;胫骨骨折切开复位钢板内固定术;胫骨人工骨植骨术
270	O208手外科	2025-04-01	2025-04-05	3626108	包月翠	女	65Y	胸椎骨折T11/T12	腰椎骨折L2;陈旧性腰椎骨折;骨质疏松;下肢静脉血栓形成;恶性肿瘤手术后的随诊检查;胆囊切除术后状态	治愈	林仲可	林仲可	林仲可	胸椎骨折球囊扩张成形术;腰椎骨折球囊扩张成形术;椎骨活组织检查;腰椎穿刺术
271	O208手外科	2025-05-24	2025-06-09	3656401	卢立树	男	63Y	受压区Ⅲ期压疮	截瘫;老年性心脏病;肺肿物;肺气肿合并肺大泡;后天性肾囊肿;腰椎退行性病变;髋关节退行性病变;膝关节病;胫骨平台骨折;膝关节积液;膀胱疾患;前列腺结石;下肢动脉粥样硬化;下肢静脉血栓形成;窦性心动过速;乙型肝炎小三阳	治愈	张文振	李士	孙成昊	带蒂皮瓣移植术;皮肤和皮下坏死组织切除清创术;焦痂切除术;皮瓣预制术
272	O208手外科	2025-06-09	2025-06-18	3660580	卢立树	男	63Y	开放性臀部损伤	手术后状态，其他特指的;截瘫[双下肢瘫痪];尘肺;肺气肿合并肺大泡;后天性肾囊肿;腰椎退行性病变;髋关节退行性病变;膝关节病;胫骨平台骨折;膝关节积液;前列腺结石;膀胱疾患;下肢动脉粥样硬化;下肢静脉血栓形成;乙型肝炎小三阳	治愈	张文振	李士	孙成昊	皮肤和皮下坏死组织切除清创术;焦痂切除术;带蒂皮瓣移植术;创面封闭式负压引流术（VSD);皮瓣预制术
273	O208手外科	2025-06-24	2025-06-26	3664548	陈小敏	女	56Y	取除骨折内固定装置	下肢静脉血栓形成;肺部感染;肺占位性病变;炎症后肺纤维化;冠状动脉粥样硬化;甲状腺结节	其他	闫合德	褚庭纲	陈明明2	肱骨内固定装置去除术;尺骨内固定装置去除术;肌腱松解术;皮肤瘢痕切除术
274	O209手外科	2025-01-06	2025-01-11	3590562	许爱莲	女	73Y	胸椎骨折T11/T12	椎间盘突出;胸椎退行性病变;腰椎退行性病变;骨质疏松;脂肪肝;胆囊结石;肝囊肿;高脂血症;下肢静脉肌间血栓形成;肺肿物;恶性肿瘤术后恢复期	治愈	林焱	陈教想	陈教想	经皮椎体球囊扩张成形术;椎骨活组织检查
275	O209手外科	2025-02-24	2025-03-01	3611103	戴金妹	女	82Y	胸椎骨折T11/T12	陈旧性腰椎骨折;骨质疏松;帕金森病;多发性肝囊肿;胆囊结石;肾结石;后天性肾囊肿;下肢动脉粥样硬化;下肢静脉血栓形成;胸腔积液	治愈	黄其杉	吴爱悯	吴爱悯	胸椎骨折球囊扩张成形术
276	O209手外科	2025-03-15	2025-03-29	3622880	翁学琴	女	56Y	颈部脊髓损伤	颈椎间盘突出;颈椎椎管狭窄;颈椎棘突骨折;胸椎棘突骨折;多处挫伤;肺挫伤;胸腔积液;肋骨纤维异常增殖症;下肢静脉血栓形成;脂肪肝;后天性肾囊肿;上颌窦炎	好转	武垚森	徐晖	孙泽明	颈椎间盘切除术;金属脊椎融合物置入术;2-3个椎骨融合或再融合;颈椎植骨术;前入路颈椎融合术
277	O209手外科	2025-04-04	2025-04-13	3629284	萧志森	男	73Y	单指不全切断	开放性指骨骨折;指神经损伤;主动脉(瓣)关闭不全;肝回声不均;下肢静脉肌间血栓形成;肋骨多处骨折;创伤性肺炎;肺肿物;肺钙化;脂肪肝;窦性心动过缓;完全性右束支传导阻滞;二尖瓣反流;心功能不全	治愈	陈星隆	褚庭纲	孙成昊	上肢动脉探查术;手部肌肉清创术;残端皮肤修整术;手指离断术
278	O209手外科	2025-04-11	2025-04-15	3630465	杨海燕	女	57Y	取除骨折内固定装置	下肢动脉粥样硬化;肺肿物;下肢静脉肌间血栓形成	其他	陈龙	金海东	金海东	胫骨内固定装置去除术;皮肤瘢痕切除术
279	O209手外科	2025-04-16	2025-05-07	3640584	金锡池	男	58Y	外踝骨折	下肢皮肤感染;下肢撕脱伤;皮下血肿;多处挫伤;下肢动脉粥样硬化;下肢静脉血栓形成;主动脉(瓣)关闭不全;脂肪肝;肋骨多处骨折;肺气肿;动脉粥样硬化;二尖瓣反流;心功能不全	治愈	陈星隆	褚庭纲	孙成昊	手中厚皮片游离移植术;皮肤和皮下坏死组织切除清创术;皮肤和皮下坏死组织切除清创术;创面封闭式负压引流术（VSD)
280	O209手外科	2025-04-29	2025-06-09	3656510	王丐有	男	71Y	开放性特指趾骨骨折	下肢皮肤撕裂伤;开放性足损伤;下肢动脉狭窄;跗骨骨折;下肢静脉血栓形成;胫腓肌腱断裂;膝关节损伤;急性失血性贫血;低蛋白血症;泌尿道感染;肺部感染;肺肿物;肺钙化;主动脉钙化;踝和足内在肌和肌腱损伤;局限性淋巴结增大;肝血管瘤;后天性肾囊肿;前列腺增生;老年性心脏病	治愈	闫合德	褚庭纲	陈明明2	趾骨骨折切开复位钢板内固定术;下肢全厚皮片移植术;下肢肌腱缝合术;皮肤和皮下坏死组织切除清创术;创面封闭式负压引流术（VSD);皮肤和皮下坏死组织切除清创术;创面封闭式负压引流术（VSD);趾骨病损切除术;趾骨病损切除术;游离皮瓣移植术;皮片取皮术
281	O210脊柱外科	2025-01-22	2025-01-23	3595930	林美香	女	77Y	骨质疏松伴有病理性骨折	骨折术后;冠状动脉支架植入后状态;肾功能不全;高血压;2型糖尿病;恶性肿瘤个人史;脂肪肝;后天性肾囊肿;下肢静脉血栓形成;下肢动脉粥样硬化;肾超声检查异常	好转	黄其杉	吴爱悯	吴爱悯	腰椎骨折球囊扩张成形术
282	O210脊柱外科	2025-01-17	2025-01-29	3598621	徐秀莲	女	65Y	胸椎多处骨折	颈椎骨折;骨质疏松;胸部脊髓损伤;颈椎退行性病变;胸椎退行性病变;腰椎退行性病变;肺炎;脂肪肝;肾结石;下肢静脉肌间血栓形成	治愈	毛方敏	潘翔翔	潘翔翔	胸椎骨折切开复位内固定术
283	O210脊柱外科	2025-02-17	2025-02-22	3607922	张春花	女	73Y	骨质疏松伴有病理性骨折，其他的	腰椎术后;多肌炎;高血压;甲状腺功能减退症;下肢动脉粥样硬化;下肢静脉肌间血栓形成;肺肿物;肝囊肿;后天性肾囊肿	好转	徐晖	徐晖	张迪	腰椎骨折球囊扩张成形术;胸椎骨折球囊扩张成形术;椎骨活组织检查
284	O210脊柱外科	2025-03-17	2025-03-22	3619979	林成竹	女	91Y	骨质疏松伴有病理性骨折，其他的	腰椎退行性病变;胸椎退行性病变;肺气肿合并肺大泡;下肢静脉肌间血栓形成;后天性肾囊肿	好转	黄其杉	黄其杉	朱思品	腰椎骨折球囊扩张成形术;胸椎骨折球囊扩张成形术
285	O210脊柱外科	2025-03-16	2025-03-31	3623972	刘化尧	男	61Y	颈部脊髓损伤	颈椎骨折;急性四肢瘫;颈椎滑脱;颈椎关节交锁;胸椎多处骨折;肋骨多处骨折;脊椎退行性病变;多处挫伤;创伤性胸腔积液;肺肿物;肺大疱;前列腺钙化灶;肾周积液;主动脉钙化;后天性肾囊肿;肾结石;下肢静脉肌间血栓形成	好转	田乃锋	田乃锋	金海明	前入路颈椎融合术;颈椎间盘切除术;金属脊椎融合物置入术;4-8个椎骨融合或再融合;未特指时间的持续性侵入性机械性通气
286	O210脊柱外科	2025-04-06	2025-04-14	3629960	吴林弟	女	86Y	腰椎压缩性骨折	骨质疏松;腰椎间盘突出;脊椎退行性病变;心脏病;肥厚型梗阻性心肌病;心房颤动;老年性心脏瓣膜病;肺动脉高压;肝内钙化点;肾结石;下肢动脉粥样硬化;下肢静脉肌间血栓形成;肺肿物;主动脉钙化	治愈	徐晖	徐晖	孙泽明	腰椎骨折球囊扩张成形术;椎骨活组织检查;腰椎穿刺术
287	O210脊柱外科	2025-04-11	2025-04-15	3630446	钱凤玉	女	76Y	骨质疏松伴有病理性骨折，其他的	骨折术后;下肢动脉粥样硬化;下肢静脉肌间血栓形成;脂肪肝;后天性肾囊肿	好转	黄其杉	黄其杉	朱思品	腰椎骨折球囊扩张成形术
288	O210脊柱外科	2025-04-27	2025-04-29	3637088	王靖高	男	67Y	腰椎骨折	胸椎骨折;腰椎骨折;骨质疏松;下肢静脉血栓形成;老年性心脏瓣膜病;肝回声不均;后天性肾囊肿;糖尿病	治愈	田乃锋	田乃锋	金海明	腰椎骨折球囊扩张成形术;椎骨活组织检查;腰椎穿刺术
289	O210脊柱外科	2025-04-29	2025-05-04	3639056	徐国虎	男	75Y	腰椎压缩性骨折	陈旧性胸椎骨折;骨质疏松;腰椎间盘突出;腰椎椎管狭窄;高血压;脾术后;直肠恶性肿瘤个人史;老年性脑萎缩;胸腔积液;下肢静脉肌间血栓形成;肺动脉高压	治愈	徐晖	徐晖	孙泽明	腰椎骨折球囊扩张成形术;椎骨活组织检查;腰椎穿刺术
290	O210脊柱外科	2025-05-02	2025-05-14	3643716	周才林	男	65Y	胸椎多处骨折	脊髓损伤;脊椎退行性病变;骨质疏松;老年性脑萎缩;后天性肾囊肿;下肢静脉血栓形成	好转	田乃锋	田乃锋	金海明	胸椎骨折切开复位内固定术;椎管减压术;胸椎植骨术
291	O210脊柱外科	2025-05-17	2025-05-25	3649133	徐正新	男	51Y	取除骨折内固定装置	下肢静脉血栓形成;脂肪肝;心功能不全	其他	黄其杉	黄其杉	窦海成	脊柱内固定装置去除术
292	O210脊柱外科	2025-05-31	2025-06-05	3654633	张长娒	男	88Y	骨质疏松伴有病理性骨折	高血压;2型糖尿病;肺肿物;多发性肝囊肿;后天性肾囊肿;下肢静脉肌间血栓形成;下肢动脉粥样硬化;主动脉钙化;慢性膀胱炎;膀胱憩室	好转	黄其杉	黄其杉	窦海成	腰椎骨折球囊扩张成形术;椎骨活组织检查;腰椎穿刺术
293	O210脊柱外科	2025-06-19	2025-06-28	3665092	陈眉眉	女	63Y	腰椎骨折L1	高血压;高脂血症;腰椎退行性病变;胸椎退行性病变;下肢静脉血栓形成;脂肪肝;腰椎间盘突出;肋骨骨折;肺肿物;骨质疏松	治愈	倪文飞	朱思品	朱思品	腰椎骨折切开复位内固定术
294	O210脊柱外科	2025-06-22	2025-06-29	3665582	滕昌香	女	86Y	胸椎骨折T11/T12	骨质疏松;腰椎退行性病变;胸椎退行性病变;腰椎滑脱;肺大疱;陈旧性肋骨骨折;下肢动脉粥样硬化;下肢静脉血栓形成	好转	倪文飞	朱思品	朱思品	胸椎骨折球囊扩张成形术;椎骨活组织检查
295	O211脊柱外科	2024-12-28	2025-01-02	3587274	刘小琴	女	56Y	腰椎骨折L1	胸椎骨折;胸椎退行性病变;再生障碍性贫血;血红蛋白尿;高血压;糖尿病;下肢静脉血栓形成;陈旧性肋骨骨折;肺部感染;脂肪肝;肾结石;肾挛缩;后天性肾囊肿;肾术后	治愈	林焱	林焱	陈教想	腰椎骨折球囊扩张成形术;胸椎骨折球囊扩张成形术;椎骨活组织检查
296	O211脊柱外科	2024-12-09	2025-01-03	3587566	李树勋	男	49Y	胸椎多处骨折	脊髓损伤;胸椎脱位;完全性瘫痪;腰椎间盘突出;颈椎间盘突出;下肢静脉血栓形成;肋骨多处骨折;创伤性胸腔积液;胆囊结石	好转	王向阳	盛孙仁	孙泽明	胸椎骨折切开复位内固定术;椎管减压术;胸椎脱位切开复位术;胸椎植骨术;胸椎间盘切除术
297	O211脊柱外科	2024-12-05	2025-01-13	3591468	孙文花	女	63Y	胸椎多处骨折	腰椎骨折L2;头部的损伤;鼻骨骨折;开放性胸部损伤;开放性多发性肋骨骨折;肩胛骨骨折;创伤性湿肺;液气胸;肺不张;胸腔积液;腹部损伤;创伤性脾破裂;腹腔积液;骨质疏松;老年性心脏瓣膜病;肺动脉高压重度;肾结石;胆囊结石;膀胱结石;下肢静脉肌间血栓形成;下肢动脉粥样硬化	治愈	武垚森	武垚森	武垚森	胸椎骨折球囊扩张成形术;全脾切除术;开腹探查术;呼吸机治疗[大于等于96小时];无创呼吸机辅助通气(高频通气[HFPPV]);胸腔穿刺术;腰椎骨折球囊扩张成形术
298	O211脊柱外科	2025-01-15	2025-01-23	3595627	方玉舟	男	95Y	骨质疏松伴有病理性骨折，其他的	腰椎骨折L3;腰椎骨折L1;高血压;心脏病;焦虑性抑郁症;肝囊肿;后天性肾囊肿;腰椎侧弯;腰椎间盘突出;下肢动脉硬化闭塞症;下肢静脉肌间血栓形成;轻度肺动脉高压;前列腺增生;心功能不全	好转	毛方敏	毛方敏	潘翔翔	腰椎骨折球囊扩张成形术
299	O211脊柱外科	2025-01-20	2025-01-25	3596360	吴金玉	女	75Y	骨质疏松伴有病理性骨折，其他的	腰椎压缩性骨折;锁骨肿瘤;腰椎间盘突出;高血压;糖尿病;老年性痴呆;肺肿物;心包积液;下肢静脉肌间血栓形成;胆囊术后	好转	王向阳	盛孙仁	孙泽明	腰椎骨折球囊扩张成形术;椎骨活组织检查
300	O211脊柱外科	2025-01-13	2025-01-25	3596556	夏月娒	女	84Y	胸椎压缩性骨折	腰椎骨折;腰椎间盘突出;腰椎退行性病变;胸椎退行性病变;老年性骨质疏松;蛛网膜囊肿;硬膜下血肿;创伤性颅内积气;蛛网膜下出血;侧脑室出血;下肢静脉肌间血栓形成;腔隙性脑梗死;老年性脑萎缩;多发性肝囊肿	好转	毛方敏	毛方敏	潘翔翔	胸椎骨折切开复位内固定术
301	O211脊柱外科	2025-02-02	2025-02-05	3602014	郑春花	女	84Y	腰椎压缩性骨折	骨质疏松;特发性(原发性)高血压;支气管扩张(症);下肢静脉肌间血栓形成;脂肪肝;后天性肾囊肿;老年性心脏病	治愈	林焱	林焱	陈教想	腰椎骨折球囊扩张成形术;经皮椎骨成形术
302	O211脊柱外科	2025-01-16	2025-02-08	3603759	陈福岳	男	68Y	颈部脊髓损伤	颈椎骨折C7;截瘫;颈椎间盘突出;颈椎脱位;创伤性胸腔积液;慢性筛窦炎;胆囊息肉;后天性肾囊肿;下肢静脉肌间血栓形成;肺部感染;肋骨骨折	好转	王向阳	盛孙仁	孙泽明	前入路颈椎融合术;颈椎骨折切开复位内固定术;颅骨牵引术;颈椎间盘切除术;金属脊椎融合物置入术;2-3个椎骨融合或再融合;颈椎植骨术;颈椎脱位切开复位术
303	O211脊柱外科	2025-02-05	2025-02-09	3604086	金陈英	女	64Y	腰椎骨折	骨质疏松;下肢静脉肌间血栓形成;肺部感染	好转	武垚森	王胜	金海明	腰椎骨折球囊扩张成形术;椎骨活组织检查
304	O211脊柱外科	2025-01-26	2025-02-09	3604338	彭勇军	男	43Y	多发性腰椎骨折	胸椎骨折;马尾损伤;颈椎间盘突出;上颌骨骨折;肋骨骨折;肌腱和肌肉损伤;下肢静脉血栓形成;创伤性胸腔积液;皮下血肿;肾上腺结节性增生	好转	武垚森	王胜	金海明	腰椎骨折切开复位内固定术;腰椎植骨术;腰椎椎板切除减压术;前外侧入路腰椎融合术;腰椎间盘切除伴椎管减压术;金属脊椎融合物置入术;2-3个椎骨融合或再融合;脊髓神经根粘连松解术;腰椎骨折切开复位内固定术
305	O211脊柱外科	2025-02-18	2025-02-22	3607872	袁阿钗	女	88Y	胸椎压缩性骨折	骨质疏松;支气管扩张伴感染;特发性(原发性)高血压;高脂血症;肺诊断性影像异常;下肢动脉粥样硬化;下肢静脉肌间血栓形成;老年性心脏病;骨折术后	治愈	林焱	林焱	陈教想	胸椎骨折球囊扩张成形术;椎骨活组织检查
306	O211脊柱外科	2025-03-07	2025-03-16	3617287	徐英	女	68Y	腰椎骨折	脊椎退行性病变;骨质疏松;冠状动脉粥样硬化;老年性心脏病;特发性(原发性)高血压;糖尿病;下肢静脉肌间血栓形成;肺肿物;肺大疱;脂肪肝	治愈	武垚森	王胜	陈教想	腰椎骨折球囊扩张成形术;腰椎穿刺术;椎骨活组织检查
307	O211脊柱外科	2025-03-08	2025-03-19	3618619	陈春兰	女	75Y	腰椎前移	腰椎间盘突出;腰椎椎管狭窄;腔隙性脑梗死;脂肪肝;肝钙化灶;下肢动脉粥样硬化;下肢静脉肌间血栓形成;心功能不全;肺肿物;陈旧性肋骨骨折	治愈	林焱	林焱	吴爱悯	椎弓根钉内固定术;经椎间孔入路腰椎体融合术;腰椎间盘切除伴椎板切除术;金属脊椎融合物置入术;2-3个椎骨融合或再融合;黄韧带部分切除术;骨病损或组织的局部切除术;椎骨植骨术;经椎间孔入路腰椎体融合术
308	O211脊柱外科	2025-03-12	2025-03-22	3620213	陈宗亮	男	53Y	颈部脊髓损伤	颈椎椎管狭窄;颈椎间盘突出;创伤性颈椎间盘破裂;颈椎横突骨折;截瘫;消化道出血;肠梗阻;糖尿病;特发性(原发性)高血压;颈椎退行性病变;胸腔积液;下肢静脉血栓形成;低钾血症;脂肪肝;肾结石	好转	武垚森	武垚森	陈教想	颈椎后路单开门椎管减压术;颈椎植骨术;椎骨内固定术
309	O211脊柱外科	2025-03-25	2025-03-29	3622750	陈美英	女	73Y	腰椎骨折L1	特发性(原发性)高血压;肺肿物;后天性肾囊肿;下肢动脉粥样硬化;心功能不全;下肢静脉肌间血栓形成;退行性主动脉瓣疾患;二尖瓣反流	好转	王向阳	盛孙仁	陈钰	腰椎骨折球囊扩张成形术;椎骨活组织检查
310	O211脊柱外科	2025-03-21	2025-04-03	3625291	林细凤	女	77Y	腰椎压缩性骨折	创伤性湿肺;桡骨远端骨折;豆骨骨折;陈旧性胸椎骨折;肋骨多处骨折;骨质疏松;多处挫伤;创伤性气胸;下肢静脉血栓形成;特发性(原发性)高血压;老年性脑萎缩;腰椎骨折L1	治愈	林仲可	林仲可	林仲可	腰椎骨折球囊扩张成形术;椎骨活组织检查;腰椎穿刺术
311	O211脊柱外科	2025-04-09	2025-04-19	3632035	王亚红	男	46Y	腰椎骨折	躯体形式的自主神经功能紊乱;骶骨骨折;腰椎间盘突出;胸椎椎管狭窄;脊椎退行性病变;耻骨骨折;肝囊肿;胆囊息肉;下肢静脉血栓形成	治愈	武垚森	王胜	陈教想	腰椎骨折切开复位内固定术;椎管减压术;黄韧带部分切除术
312	O211脊柱外科	2025-04-15	2025-04-26	3635195	江为正	男	68Y	颈部脊髓损伤	颈椎骨折;脾术后;清创术后;高血压;冠状动脉粥样硬化性心脏病;下肢静脉血栓形成;前列腺结石;胸腔积液	好转	毛方敏	毛方敏	潘翔翔	颈椎后路单开门椎管减压术
313	O211脊柱外科	2025-04-22	2025-04-26	3635319	章秀凤	女	85Y	胸椎压缩性骨折	胸椎退行性病变;腰椎退行性病变;腰椎间盘突出;脂肪肝;胆囊息肉;心功能不全;下肢动脉粥样硬化;下肢静脉肌间血栓形成;肋骨多处骨折;孤立性肺结节;主动脉钙化	未愈	林焱	林焱	吴爱悯
314	O211脊柱外科	2025-04-26	2025-04-30	3637243	曹国娟	女	69Y	腰椎骨折L1	桡骨远端骨折;骨质疏松;2型糖尿病;心功能不全;肝胆管扩张;胆囊息肉;后天性肾囊肿;下肢静脉血栓形成	治愈	吴爱悯	吴爱悯	吴爱悯	腰椎骨折球囊扩张成形术;经皮椎骨成形术
315	O211脊柱外科	2025-04-22	2025-05-20	3647031	陈春花	女	85Y	寰枢椎脱位	颈椎椎管狭窄;颈部脊髓损伤;颈椎间盘突出;颈椎退行性病变;贫血;低蛋白血症;胆囊结石;后天性肾囊肿;颈动脉硬化;下肢静脉肌间血栓形成;下肢动脉粥样硬化;主动脉钙化;陈旧性颈椎骨折	好转	王向阳	盛孙仁	陈钰	寰-枢椎融合术，经口;髂骨切除术用作移植物;颈椎植骨术
316	O211脊柱外科	2025-05-18	2025-05-24	3648794	林瑞凤	女	74Y	胸椎多处骨折	老年性骨质疏松;腰椎骨折L3;高血压;睡眠障碍;脂肪肝;下肢静脉肌间血栓形成;退行性主动脉瓣疾患;心功能不全;腰椎间盘突出	好转	王向阳	盛孙仁	陈钰	胸椎骨折球囊扩张成形术;椎骨活组织检查;腰椎骨折球囊扩张成形术
317	O211脊柱外科	2025-05-14	2025-05-27	3650444	陈招弟	女	87Y	腰椎骨折L1	骨质疏松;腰椎间盘突出;胸椎间盘突出;帕金森病;焦虑障碍;椎-基底动脉供血不足;肾结石;后天性肾囊肿;脂肪肝;下肢动脉粥样硬化;下肢静脉肌间血栓形成;肺大疱;胸腔积液;主动脉钙化	好转	王向阳	盛孙仁	陈钰	腰椎骨折球囊扩张成形术;椎骨活组织检查
318	O211脊柱外科	2025-06-04	2025-06-10	3656961	周奶娒	女	73Y	腰椎骨折L1	老年性骨质疏松;下肢深静脉血栓形成;脂肪肝;后天性肾囊肿;肺结节病;髂静脉血栓形成	治愈	毛方敏	毛方敏	张迪	腰椎骨折球囊扩张成形术;椎骨活组织检查
319	O303康复科	2024-12-17	2025-01-25	3596435	胡振松	男	47Y	腰部脊髓损伤	创伤性截瘫;神经源性膀胱;神经源性肠;腰椎骨折L1;胸椎骨折T11/T12;胫骨平台骨折;胫骨髁间棘骨折;膝关节前十字韧带损伤;下肢静脉肌间血栓形成;下肢深静脉血栓形成;前列腺结石;泌尿道感染;涉及使用其他康复操作的医疗	好转	蒋松鹤	卢君艳	高丽萍	截瘫肢体综合训练;运动训练;低频脉冲电治疗;针刺;下腔静脉滤器置入术;股静脉穿刺术
320	O303康复科	2024-12-18	2025-01-27	3597442	柳美玲	女	66Y	关节僵硬	高血压;骨质疏松;下肢静脉血栓形成;肋骨多处骨折;桡骨远端骨折;指骨骨折;面部挫伤;创伤性胸腔积液;肺气肿合并肺大泡;频发性室性期前收缩;房性期前收缩[房性早搏];涉及使用其他康复操作的医疗;髋关节置换术后;骨折术后	好转	蒋松鹤	郑余银	金韵	针刺;运动训练;关节松动法;超声波联合治疗;骨创伤治疗仪使用;作业疗法
321	O303康复科	2024-12-28	2025-01-28	3597855	缪爱玉	女	68Y	关节僵硬	肋骨多处骨折;掌骨骨折;静脉血栓形成;胸腔积液;骨质疏松;泌尿道感染;骨折术后;涉及使用其他康复操作的医疗	好转	蒋松鹤	郑余银	邹恩苗	运动训练;针刺;物理疗法
322	O303康复科	2025-01-13	2025-02-04	3601319	孙文花	女	63Y	运动障碍	胸椎压缩性骨折;下肢静脉肌间血栓形成;创伤性颅内出血;创伤性湿肺;骨质疏松;肩胛骨骨折;腰椎压缩性骨折;肋骨多处骨折;鼻骨骨折;肾结石;膀胱结石;下肢动脉粥样硬化;腰椎间盘突出;肺不张;创伤性胸腔积液;结肠积气;涉及使用其他康复操作的医疗;脾术后	好转	蒋松鹤	林海燕2	高丽萍	运动训练;电动起立床训练;物理疗法;毫针刺法
323	O303康复科	2025-01-26	2025-02-07	3603255	张熊	男	42Y	创伤性截瘫	胸部脊髓损伤;胸椎骨折;耻骨骨折;髂骨骨折;系统性红斑狼疮;胆囊结石;后天性肾囊肿;泌尿道感染;下肢静脉肌间血栓形成;涉及使用其他康复操作的医疗;乙肝表面抗原携带者	好转	蒋松鹤	林海燕2	郑力宇	截瘫肢体综合训练;运动训练;针灸;低频脉冲电治疗
324	O303康复科	2025-01-03	2025-02-09	3604299	李树勋	男	49Y	创伤性截瘫	胸部脊髓损伤;神经源性膀胱;神经源性肠;胸椎多处骨折;胸椎横突骨折;颈椎退行性病变;颈椎间盘突出;胸椎退行性病变;下肢静脉血栓形成;肋骨骨折;胸腔积液;胆囊结石;肝功能检查的异常结果;泌尿道感染;高血压;涉及使用其他康复操作的医疗;骨折术后	好转	蒋松鹤	郑余银	邹恩苗	截瘫肢体综合训练;运动训练;电动起立床训练;针刺;其他控制气压和空气成分的疗法;低频脉冲电治疗;超声波联合治疗
325	O303康复科	2025-01-19	2025-02-09	3604508	段国平	男	40Y	关节僵硬	下肢静脉肌间血栓形成;涉及使用其他康复操作的医疗;骨折术后	好转	蒋松鹤	郑余银	邹恩苗	运动训练;关节松动法;低频脉冲电治疗;中药熏治;超声波联合治疗
326	O303康复科	2025-01-20	2025-02-10	3604759	严小如	女	63Y	运动障碍	腰椎骨折;下肢静脉血栓形成;高血压;肺部感染;泌尿道感染;皮肤感觉障碍;外踝骨折;跟骨骨折;睡眠障碍;腰椎间盘突出;腰椎椎管狭窄;多发性腰椎骨折;多处挫伤;胸腔积液;肺诊断性影像检查的异常所见;脂肪肝;肝囊肿;心功能不全;涉及使用其他康复操作的医疗	好转	蒋松鹤	林海燕2	蔡晨晨	截瘫肢体综合训练;其他控制气压和空气成分的疗法
327	O303康复科	2025-01-22	2025-02-20	3607171	赖家好	男	73Y	四肢瘫痪	颈部脊髓损伤;肺挫伤;下肢静脉肌间血栓形成;冠状动脉粥样硬化性心脏病;颈椎间盘突出;髋臼骨折;骨盆骨折;陈旧性关节软骨损伤;耻骨骨折;腰椎骨折;肋骨骨折;腰椎椎管狭窄;慢性支气管炎伴肺气肿;间质性肺病;肺不张;陈旧性肺结核;胆囊结石;涉及使用其他康复操作的医疗;结肠术后	好转	蒋松鹤	林海燕2	郑力宇	运动训练;针刺;低频脉冲电治疗;物理疗法;作业疗法
328	O303康复科	2025-02-04	2025-02-24	3608565	周志刚	男	66Y	关节僵硬	肺栓塞;下肢静脉肌间血栓形成;高血压;痛风;肱骨骨折;腓骨骨折;涉及使用康复操作的医疗;脾术后;骨折术后;肺术后	好转	蒋松鹤	郑余银	邹恩苗	运动训练;关节松动法;超声波联合治疗;蜡疗;物理疗法
329	O303康复科	2025-02-08	2025-02-27	3610104	陈福岳	男	68Y	创伤性截瘫	神经源性膀胱;神经源性直肠;运动障碍;下肢静脉肌间血栓形成;肋骨骨折;肺部感染;胸腔积液;退行性主动脉瓣疾患;二尖瓣反流;胆囊息肉;后天性肾囊肿;副乳房;泌尿道感染;涉及使用其他康复操作的医疗;颈椎术后	好转	蒋松鹤	林海燕2	蔡晨晨	其他控制气压和空气成分的疗法;截瘫肢体综合训练;针刺;作业疗法;手功能评估;电动起立床训练;超短波短波疗法
330	O303康复科	2025-02-09	2025-03-13	3616319	李艳丽	女	37Y	截瘫[双下肢瘫痪]	胸部脊髓损伤;肺部感染;下肢深静脉血栓形成;泌尿道感染;低钠血症;肺挫伤;液气胸;胸椎骨折;开放性多发性肋骨骨折;头皮血肿;神经源性肠;神经源性膀胱;胸椎椎管狭窄;涉及使用其他康复操作的医疗	好转	蒋松鹤	林海燕2	高丽萍	截瘫肢体综合训练;运动训练;低频脉冲电治疗;康复评定;毫针刺法;超声疗法;其他控制气压和空气成分的疗法
331	O303康复科	2025-02-09	2025-03-16	3617342	彭勇军	男	43Y	截瘫[双下肢瘫痪]	马尾损伤;神经源性膀胱;神经源性肠;腰椎骨折L3;胸椎骨折;颈椎间盘突出;牙槽骨骨折;肋骨骨折;下肢静脉肌间血栓形成;胸腔积液;多处皮肤浅表血肿;肾上腺血肿;泌尿道感染;涉及使用其他康复操作的医疗	好转	蒋松鹤	林海燕2	郑力宇	截瘫肢体综合训练;运动训练;低频脉冲电治疗;超声波联合治疗;毫针刺法
332	O303康复科	2025-02-22	2025-03-19	3618785	王爱弟	女	51Y	下肢静脉血栓形成	腓骨骨折;创伤性硬脑膜外出血;颞叶出血;脑挫伤;肺部感染;运动障碍;下肢静脉肌间血栓形成;涉及使用其他康复操作的医疗;骨折术后恢复期	好转	蒋松鹤	林海燕2	蔡晨晨	针灸;运动训练;低频脉冲电治疗;超声波联合治疗;下腔静脉滤器置入术;股静脉穿刺术
333	O303康复科	2025-03-15	2025-04-22	3633362	林志谡	男	67Y	臂丛神经损伤	颈部脊髓损伤;胸椎压缩性骨折;肩胛骨骨折;颈椎间盘突出;腰椎间盘突出;胸椎骨折;腹腔积液;胸腔积液;肋骨多处骨折;肝功能检查的异常结果;下肢静脉肌间血栓形成;涉及使用其他康复操作的医疗	好转	蒋松鹤	林海燕2	郑力宇	运动训练;作业疗法;低频脉冲电治疗;毫针刺法
334	O303康复科	2025-03-31	2025-05-05	3639395	刘化尧	男	61Y	四肢瘫痪	颈部脊髓损伤;颈椎滑脱;颈椎多处骨折;颈椎间盘突出;胸椎骨折;肋骨多处骨折;胸椎退行性病变;腰椎退行性病变;多处挫伤;胸腔积液;肺肿物;肺大疱;前列腺钙化灶;后天性肾囊肿;肾结石;下肢静脉肌间血栓形成;特发性(原发性)高血压;泌尿道感染;2型糖尿病;涉及使用其他康复操作的医疗	好转	蒋松鹤	林海燕2	郑力宇	截瘫肢体综合训练;运动训练;毫针刺法;电动起立床训练
335	O303康复科	2025-03-29	2025-05-07	3640439	李艳丽	女	37Y	截瘫	胸部脊髓损伤;神经源性膀胱;神经源性肠;肺挫伤;创伤性胸腔积液;创伤性气胸;肺部感染;胸椎骨折;胸椎椎管狭窄;肋骨多处骨折;头皮血肿;颅腔积气;下肢静脉肌间血栓形成;涉及使用其他康复操作的医疗	好转	蒋松鹤	林海燕2	蔡晨晨	其他热疗法;截瘫肢体综合训练;等速肌力训练;功能性评估;低频脉冲电治疗;电动起立床训练;超声波联合治疗
336	O303康复科	2025-05-07	2025-05-14	3643738	陈爱玉	女	70Y	膝关节僵硬	膝关节积液;膝关节退行性病变;下肢静脉肌间血栓形成;骨折术后	好转	蒋松鹤	郑余银	邹恩苗	运动训练;关节松动法;其他物理治疗
337	O303康复科	2025-03-25	2025-05-17	3645251	徐兰芬	女	55Y	骨盆骨折	骶骨骨折;踝关节骨折;胫腓骨闭合性骨折;腰椎骨折;下肢静脉血栓形成;下肢动脉粥样硬化;胸椎退行性病变;涉及使用其他康复操作的医疗	好转	蒋松鹤	郑余银		骨盆骨折切开复位钢板内固定术;踝关节骨折切开复位钢板内固定术;骶骨骨折切开复位内固定术;腓骨植骨术;胫骨植骨术;筋膜成形术;盆骨外固定术;应用单平面外固定架;耻骨植骨术;胫骨结节牵引;截瘫肢体综合训练;关节松动法;针刺;低频脉冲电治疗;超声波联合治疗
338	O303康复科	2025-04-19	2025-05-18	3635190	王亚红	男	46Y	脊髓损伤	截瘫;腰椎骨折L1;骶骨骨折;腰椎间盘突出;胸椎椎管狭窄;胸椎退行性病变;耻骨骨折;肝囊肿;胆囊息肉;下肢静脉血栓形成;涉及使用其他康复操作的医疗	好转	蒋松鹤	林海燕2	郑力宇	截瘫肢体综合训练;运动训练;低频脉冲电治疗;超声波联合治疗;针刺
339	O303康复科	2025-04-24	2025-05-19	3646090	吴三英	女	63Y	人工关节置换术后假体功能障碍	陈旧性趾骨骨折;骨质疏松;肝血管瘤;退行性主动脉瓣疾患;主动脉(瓣)关闭不全;下肢静脉肌间血栓形成;特发性(原发性)高血压;涉及使用其他康复操作的医疗	好转	蒋松鹤	林海燕2	蔡晨晨	运动训练;关节松动法;低频脉冲电治疗;蜡疗
340	O303康复科	2025-03-25	2025-05-21	3632910	吕作富	男	60Y	胸椎多处骨折	胸椎脱位;胸部脊髓损伤;创伤性休克;创伤性截瘫;下肢深静脉血栓形成;受压区压疮;胸部挫伤;创伤性蛛网膜下腔出血;创伤性硬脑膜下出血;颧骨骨折;耳损伤;面部裂伤;面神经损伤;肋骨骨折;创伤性胸腔积液;肺不张;肺部感染;肝功能不全;泌尿道感染;颈椎退行性病变;上颌窦炎	治愈	蒋松鹤	林海燕2	高丽萍	胸椎骨折切开复位内固定术;颧骨骨折切开复位内固定术;颧弓骨折切开复位术;颧弓成形术;颧骨成形术;面神经缝合术;皮肤和皮下组织非切除性清创;胸椎植骨术;胸椎椎板切除减压术;呼吸机治疗[大于等于96小时];气管内插管;运动训练;截瘫肢体综合训练;电动起立床训练;针刺
341	O303康复科	2025-04-28	2025-05-22	3647842	王立功	男	53Y	截瘫	胸部脊髓损伤;神经源性膀胱;神经源性肠;大便失禁;泌尿道感染;肺部感染;下肢深静脉血栓形成;胸椎多处骨折;肋骨多处骨折;骨质疏松;肾周积液;胸腔积液;低钠血症;胸椎退行性病变;手术后切口感染;涉及使用其他康复操作的医疗	好转	蒋松鹤	林海燕2	高丽萍	截瘫肢体综合训练;运动训练;物理疗法;毫针刺法;留置导尿管的置换术
342	O303康复科	2025-05-26	2025-06-09	3656464	张柳凤	女	76Y	胸部脊髓损伤	胸椎压缩性骨折;枢椎骨折;胸椎椎弓骨折;颈椎棘突骨折;肋骨多处骨折;腰椎间盘突出;腰椎椎管狭窄;颈椎退行性病变;颈椎间盘突出;创伤性湿肺;创伤性胸腔积液;特发性(原发性)高血压;高脂血症;下肢深静脉血栓形成;贫血;睡眠障碍;肺肿物;后天性肾囊肿;冠状动脉粥样硬化;骨质疏松	好转	蒋松鹤	林海燕2	高丽萍	物理疗法;运动训练;低频脉冲电治疗;超声波联合治疗
343	O303康复科	2025-06-09	2025-06-15	3659251	陈春花	女	72Y	髋臼骨折	耻骨骨折;骶骨骨折;盆腔积液;颈椎间盘突出;腰椎间盘突出;下肢静脉肌间血栓形成;特发性(原发性)高血压;腔隙性脑梗死;老年性脑萎缩;脂肪肝;肾结石;后天性肾囊肿;涉及使用其他康复操作的医疗	好转	蒋松鹤	郑余银	吴登敏	物理疗法;运动训练;低频脉冲电治疗
344	O303康复科	2025-05-14	2025-06-16	3659651	周才林	男	65Y	截瘫[双下肢瘫痪]	胸部脊髓损伤;胸椎多处骨折;胸椎退行性病变;骨质疏松;老年性脑萎缩;后天性肾囊肿;下肢深静脉血栓形成;下肢静脉肌间血栓形成;泌尿道感染;前列腺增生;脊柱侧弯	好转	蒋松鹤	林海燕2	郑力宇	运动训练;低频脉冲电治疗;毫针刺法
345	O303康复科	2025-04-29	2025-06-20	3661322	陈永芬	女	54Y	取除外固定装置	关节僵硬;尺骨茎突骨折伴桡骨远端骨折;头皮血肿;腰椎退行性病变;痔不伴有并发症;便秘;下肢静脉肌间血栓形成;低钾血症;清创术后	其他	蒋松鹤	郑余银	吴登敏	骨盆外固定装置去除术;关节松动法;作业疗法;物理疗法;超声波联合治疗;低频脉冲电治疗
346	O303康复科	2025-04-20	2025-06-28	3664901	胡素芬	女	54Y	尺骨茎突骨折伴桡骨远端骨折	下肢深静脉血栓形成;泌尿道感染;肝功能检查的异常结果;下尺桡关节脱位;掌骨骨折;肱骨近端骨折;骨盆骨折;髋臼骨折;肩胛骨骨折;颞骨骨折;面神经损伤;锁骨骨折;腰椎骨折;关节僵硬;肋骨骨折;创伤性胸腔积液;高尿酸血症;皮炎，其他特指的;肝回声不均;胆囊息肉	治愈	蒋松鹤	林海燕2	高丽萍	桡骨骨折切开复位钢板内固定术;尺骨骨折切开复位钢板内固定术;关节腔隙骨水泥填充术;掌骨骨折切开复位钢板内固定术;筋膜成形术;运动训练;关节松动法;毫针刺法;物理疗法;其他控制气压和空气成分的疗法
347	O303康复科	2025-05-15	2025-06-29	3665488	吴贻文	男	87Y	股骨粗隆间骨折	特发性(原发性)高血压;冠状动脉性心脏病;肺肿物;下肢静脉肌间血栓形成;前列腺结石;前列腺增生;重度贫血;泌尿道感染;关节僵硬;原发性双侧膝关节病;涉及使用其他康复操作的医疗;前列腺术后	好转	蒋松鹤	林海燕2	郑力宇	股骨骨折闭合复位髓内针内固定术;运动训练;关节松动法;低频脉冲电治疗;超声波联合治疗
首页	尾页
骨折+肺栓塞
序号	出院科室	入院日期	出院日期	病案号	病人	性别	年龄	主诊断	非主诊断	转归	主任	主治	住院	手术
					姓名					情况	医师	医师	医师	名称
1	H11儿童骨科/综合骨科	2025-05-10	2025-05-15	3644446	张阿花	女	72Y	股骨颈骨折	脑梗死;帕金森病;动脉粥样硬化;精神分裂症;下肢静脉血栓形成;肺栓塞;老年性心脏病	好转	周一飞	周一飞	翁摄稷
2	L103呼吸/风湿免疫	2025-02-02	2025-02-06	3602402	王农妹	女	82Y	肺栓塞	轻度肺动脉高压;2型糖尿病;高血压;骨质疏松;腔隙性脑梗死;老年性心脏瓣膜病;肋骨多处骨折;下肢动脉粥样硬化;乙肝表面抗原携带者	好转	何剑波	何剑波	李慧莹
3	L103呼吸内科	2025-04-24	2025-04-28	3636516	姚爱华	女	67Y	肺栓塞	下肢深静脉血栓形成;甲状腺结节;乳房纤维囊性乳腺病;糜烂性胃炎;高脂血症;脂肪肝;高尿酸血症;子宫平滑肌瘤;陈旧性肋骨骨折;颈椎间盘突出;甲状腺术后;骨折术后	好转	戴元荣	林慧	王道会	胃镜检查;结肠镜检查
4	L104呼吸/肾内科	2025-02-01	2025-03-08	3614117	吴碎香	女	65Y	腰椎骨折L3	先天性髋臼发育不良;肺栓塞;髋关节周围炎;胆囊炎;胆囊结石;肝功能不全;骨质疏松;高血压;癫痫;银屑病;下腔静脉血栓形成;甲状腺术后;子宫术后	好转	颜孙舜	颜孙舜	彭燕平	腰椎骨折球囊扩张成形术;全髋关节置换;关节滑膜切除术;髋轴面，陶瓷与聚乙烯
5	L104呼吸/肾内科	2025-04-20	2025-04-27	3635914	程翠弟	女	84Y	肺栓塞	肺肿物;肺大疱;甲状腺结节;肝功能不全;高脂血症;胆囊结石;腰椎退行性病变;颈动脉硬化;下肢动脉粥样硬化;骨折术后	好转	颜孙舜	李慧莹	李慧莹
6	L115肿瘤放化疗科	2024-11-19	2025-02-03	3601036	沈上力	男	69Y	手术后恶性肿瘤化学治疗	恶性肿瘤靶向治疗;横结肠恶性肿瘤;腹腔继发恶性肿瘤;肺继发恶性肿瘤;腹膜继发恶性肿瘤;肠梗阻;肠道感染;肺栓塞;陈旧性肋骨骨折;胸腔积液;包裹性腹腔积液;食管裂孔疝;糜烂性胃炎;下肢动脉粥样硬化	好转	陈文俊	吴聪聪	周盈盈2	静脉注射化疗药物;静脉注射化疗药物;静脉注射化疗药物;分子靶向治疗;分子靶向治疗;分子靶向治疗;胸腔内注射;胸腔内注射;胸腔内注射;胸腔内注射;胸腔闭式引流术
7	O210脊柱外科	2025-03-08	2025-03-10	3615110	叶银松	男	68Y	胸椎骨折T3/T4	颈椎骨折;急性不完全性四肢瘫;急性冠脉综合征;急性肺栓塞;血小板减少;淋巴结增大;恶性肿瘤个人史;肺部感染;胸腔积液;骨质疏松;脊椎退行性病变;椎管内占位性病变;腰椎间盘突出;颈椎间盘突出;腰椎峡部裂;腰椎滑脱;甲状腺功能检查的异常结果;肝功能检查的异常结果;多发性肝囊肿	好转	田乃锋	田乃锋	金海明
8	O211脊柱外科	2025-02-20	2025-02-24	3608488	李少英	女	76Y	胸椎压缩性骨折	老年性骨质疏松;脊柱侧弯;肺栓塞;肺肿物;肝囊肿;甲状腺术后;骨折术后	好转	王向阳	盛孙仁	孙泽明	胸椎骨折球囊扩张成形术;椎骨活组织检查
9	O303康复科	2025-02-04	2025-02-24	3608565	周志刚	男	66Y	关节僵硬	肺栓塞;下肢静脉肌间血栓形成;高血压;痛风;肱骨骨折;腓骨骨折;涉及使用康复操作的医疗;脾术后;骨折术后;肺术后	好转	蒋松鹤	郑余银	邹恩苗	运动训练;关节松动法;超声波联合治疗;蜡疗;物理疗法
10	O303康复科	2025-02-24	2025-04-08	3627224	周志刚	男	66Y	肱骨外科颈骨折	急性肺栓塞;特发性(原发性)高血压;痛风;关节僵硬;腓骨骨折;涉及使用其他康复操作的医疗;骨折术后	好转	蒋松鹤	郑余银	邹恩苗	肱骨骨折切开复位钢板内固定术;肩袖修补术;肱骨植骨术;运动训练;超声波联合治疗;关节松动法;低频脉冲电治疗
11	O303康复科	2025-04-08	2025-05-01	3638288	周志刚	男	66Y	肩关节僵硬	肱骨外科颈骨折;腓骨骨折;肺栓塞;特发性(原发性)高血压;颈动脉硬化;肺肿物;涉及使用其他康复操作的医疗;脾术后;骨折术后;肺术后	好转	蒋松鹤	郑余银	邹恩苗	运动训练;关节松动法;超声波联合治疗;蜡疗;平衡功能训练
首页	尾页
