# Supplementary material for: Variable Rate of D-dimer Predicts Venous Thromboembolism in Postoperative Fracture Patients: A Single-Center Retrospective Cohort Study
Source: Research Square preprint supplement (doi:10.21203/rs.3.rs-7878480/v1), 2025-12-09
Supplement: Supplementary file 3 [file 5aa5922d52cc77e17c0d9869.xlsx]

## Sheet: Sheet1
序号	出院科室	入院日期	出院日期	病案号	病人	性别	年龄	主诊断	非主诊断	转归	主任	主治	住院	手术
					姓名					情况	医师	医师	医师	名称
1	A03康复	2020-01-13	2020-01-29	2945859	何书昊	男	7Y	硬膜外血肿	鼻骨骨折;马蹄形肾;慢性鼻炎	好转	汤行录	刘婵	刘婵
2	A03康复	2020-01-22	2020-02-06	2948920	叶安琪	女	10Y	创伤性颅内出血	硬膜外血肿;头皮血肿;创伤性蛛网膜下腔出血;脑积水;颞骨骨折;肝功能异常;脑挫伤	好转	汤行录	涂丰霞	赵凯怡
3	A03康复	2020-02-14	2020-02-29	2954235	叶安琪	女	9Y	脑挫伤	颞骨骨折;顶骨骨折	治愈	汤行录	涂丰霞	涂丰霞
4	A03康复	2020-02-14	2020-03-02	2955197	洪涛	男	1Y	脑外伤后综合征	额骨骨折;腹腔淋巴结肿大;脑积水;胆囊结石;鼻骨骨折;周围性面神经麻痹;急性上呼吸道感染;皮肤挫伤;头皮血肿;特指躯体形式障碍	好转	汤行录	刘婵	赵凯怡
5	A03康复	2020-02-14	2020-03-24	2962123	郑喻文	女	1Y	创伤性蛛网膜下腔出血	继发性外斜视;慢性失血性贫血;轮状病毒肠炎;急性上呼吸道感染;视神经损伤;眼挫伤;急性支气管炎;脑挫伤;锁骨骨折;颅骨骨折;顶骨骨折;肝功能异常;头皮血肿	治愈	汤行录	涂丰霞	赵凯怡
6	A03康复	2020-03-15	2020-04-18	2969390	郑涵楦	女	2Y	偏瘫	肝功能异常;脑血肿;急性上呼吸道感染;颅骨骨折;脑积水;特指手术后状态	好转	汤行录	刘婵	赵凯怡
7	A03康复	2020-03-05	2020-04-20	2970201	姚铭轩	男	7M	创伤性蛛网膜下腔出血	失血性休克;急性喘息性支气管炎;周围性面神经麻痹;慢性失血性贫血;急性上呼吸道感染;皮肤挫伤;偏瘫;肺挫伤;创伤性脑血肿;脑挫伤;颅骨骨折;气胸;脑疝;头皮血肿	好转	汤行录	刘婵	赵凯怡	颅骨切除减压术
8	A03康复	2020-04-08	2020-04-22	2971192	唐安琪	女	4Y	脑挫伤	特指手术后状态;动眼神经损伤;颅骨骨折;眶骨骨折;脑积水	好转	汤行录	刘婵	赵凯怡
9	A03康复	2020-03-11	2020-04-26	2972037	刘辰新	男	4Y	偏瘫	急性胃肠炎;周围性面神经麻痹;硬膜下血肿;脑挫伤;特指手术后状态;肝功能异常;运动性失语;急性支气管炎;脑积水;颅骨骨折	好转	汤行录	刘婵	赵凯怡
10	A03康复	2020-04-26	2020-05-12	2977150	刘辰新	男	4Y	偏瘫	胆囊结石;周围性面神经麻痹;脑挫伤;颅骨骨折;气管狭窄;脑积水	好转	汤行录	刘婵	赵凯怡
11	A03康复	2020-04-25	2020-05-27	2981992	王威威	男	9Y	脑外伤后综合征	特指躯体形式障碍;陈旧性髌骨骨折;陈旧性肩胛骨骨折;急性上呼吸道感染;陈旧性颅骨骨折;脑积水;特指手术后状态	好转	汤行录	汤行录	陈珊
12	A03康复	2020-06-13	2020-06-24	2990883	洪涛	男	2Y	脑挫伤	疱疹病毒性口炎;周围性面神经麻痹;鼻骨骨折;额骨骨折;脑积水	好转	汤行录	涂丰霞	陈珊
13	A03康复	2020-06-12	2020-06-28	2992150	王志远	男	8Y	脑外伤后综合征	额骨骨折;多处浅表损伤;硬膜外血肿;脑挫伤	好转	汤行录	刘婵	陈珊
14	A03康复	2020-07-06	2020-07-28	3002211	郑霖靖	女	12Y	脑挫伤	创伤性颅内出血;肾结石;皮肤挫伤;头皮血肿;肺挫伤;颅骨骨折	好转	汤行录	涂丰霞	陈珊
15	A03康复	2020-07-14	2020-08-01	3003597	王志远	男	8Y	偏瘫	脑挫伤;额骨骨折;硬膜下血肿;急性上呼吸道感染	好转	汤行录	刘婵	陈珊
16	A03康复	2020-08-11	2020-09-14	3018380	石靖涛	男	16D	臂丛神经损伤	肝功能异常;锁骨骨折;肩胛骨骨折	好转	汤行录	刘婵	陈珊
17	A03康复	2020-09-23	2020-09-26	3022190	黄章运	男	5Y	脑挫伤	特指手术后状态;开放性多发性损伤;多处浅表损伤;外展神经损伤;颞骨骨折;蛛网膜下腔出血;脑肿物	好转	汤行录	涂丰霞	陈珊
18	A03康复	2020-09-06	2020-09-30	3023565	杨雨	女	4Y	偏瘫	胆囊结石;多发性损伤;颅内损伤;头皮开放性伤口;颅骨骨折;鼻骨骨折;蛛网膜下腔出血;硬脑膜下积液	好转	汤行录	刘婵	陈珊
19	A03康复	2020-09-07	2020-10-24	3030658	张浩楠	男	4Y	脑挫伤	特指听觉异常;肝损伤;周围性面神经麻痹;创伤性颅内出血;颅骨骨折;蛛网膜下腔出血;多发性损伤;硬膜下血肿	好转	汤行录	刘婵	陈珊
20	A03康复	2020-09-22	2020-11-03	3034323	周雅萱	女	7Y	脑挫伤	颅内损伤;白细胞疾患;特指手术后状态;脑积水;枕骨骨折;蛛网膜下腔出血;急性上呼吸道感染	好转	汤行录	刘婵	陈珊
21	A03康复	2020-10-26	2020-11-14	3038204	杨雨	女	4Y	偏瘫	特指手术后状态;胆囊结石;开放性多发性损伤;硬膜下血肿;急性上呼吸道感染;脑挫伤;颅骨骨折;鼻骨骨折	好转	汤行录	汤行录	陈珊
22	A03康复	2020-11-29	2020-12-02	3044252	周雅萱	女	7Y	脑挫伤	急性胃肠炎;头部特指损伤的后遗症;外伤后脑积水;枕骨骨折;特指手术后状态	治愈	汤行录	汤行录	赵凯怡
23	A03康复	2020-12-08	2020-12-23	3051307	杨雨	女	4Y	偏瘫	开放性多发性损伤;脑挫伤;多发性颅骨骨折;硬脑膜下积液;鼻骨骨折;特指手术后状态;头皮撕脱	好转	汤行录	汤行录	216129
24	A04(儿童icu)	2019-12-22	2020-01-02	2937526	潘振宇	男	3M	脑挫伤	肝损伤;多发性损伤;枕骨骨折;肺挫伤;头皮血肿	治愈	严纯雪	金江兵	薛超超
25	A04(儿童icu)	2020-01-20	2020-02-16	2950470	张钰晨	男	2M	化脓性脑膜炎	特指-般症状和体征;脑挫伤;颅骨骨折;肺炎;脑疝;药物性皮炎	好转	南向珍	娄鹏程	叶小姣	开颅探查术
26	A04(儿童icu)	2020-03-07	2020-03-12	2958514	瞿业兴	男	11Y	颅骨骨折	特指手术后状态;脑疝;硬膜外血肿;慢性失血性贫血;脊髓损伤;脑挫伤;肝功能异常;心肌损害;失血性休克	未愈	南向珍	娄鹏程	卢露	开颅探查术;颅骨切除减压术;颅内镜下脑内血肿引流术
27	A04(儿童icu)	2020-04-05	2020-04-20	2970453	彭思颖	女	3Y	陈旧性股骨粗隆间骨折	下颌骨骨折;鼻骨骨折;陈旧性上颌骨骨折;眶骨骨折	好转	严纯雪	王林霞	唐震海	上颌骨骨折切开复位固定术;股骨骨折切开复位术;下颌骨骨折切开复位内固定术
28	A04(儿童icu)	2020-04-08	2020-04-25	2971969	邱锦鑫	男	3Y	脑挫伤	休克;陈旧性股骨骨折;硬膜下血肿;中度贫血;头皮血肿;肺挫伤;颅骨骨折;枕骨骨折	好转	严纯雪	王林霞	薛超超	股骨骨折切开复位术
29	A04(儿童icu)	2020-04-17	2020-05-05	2975141	陈煜鉥	男	3Y	创伤性肝破裂	皮肤挫伤;脑挫伤;肺挫伤;陈旧性肋骨骨折;陈旧性股骨骨折;腹膜炎	治愈	南向珍	梁亚峰	梁亚峰	腹腔冲洗检查;股骨骨折切开复位术;皮肤和皮下坏死组织切除清创术;肝破裂修补术
30	A04(儿童icu)	2020-04-30	2020-05-14	2977994	陈自豪	男	8Y	急性硬膜下出血	股骨骨折;多器官功能障碍综合征(MODS);脑梗死;脑疝;心脏骤停;开放性胫腓骨干骨折;肺炎;气胸	死亡	严纯雪	王林霞	卢露
31	A04(儿童icu)	2020-05-15	2020-06-02	2984047	杨喜喜	男	3Y	枕骨骨折	血友病A型;重症肺炎;肺动脉高压轻度;脑疝;脑干梗死;小脑梗死;房间隔缺损;中枢性呼吸衰竭;创伤性硬膜外出血	好转	南向珍	梁亚峰	梁亚峰	颅内血肿硬通道穿刺引流术
32	A04(儿童icu)	2020-06-11	2020-06-11	2986781	林祖增	男	2Y	脑挫伤	颅骨骨折;脑疝;创伤性蛛网膜下腔出血;颅内损伤;肺挫伤	未愈	严纯雪	金江兵	卢露	颅骨切除减压术
33	A04(儿童icu)	2020-07-08	2020-07-09	2996066	李敏铭	女	6Y	颅骨骨折	心脏停搏复苏成功;中枢性呼吸衰竭;颅内出血;急性失血性贫血;尿崩症;颅咽管良性肿瘤;头皮血肿;肺挫伤;脑挫伤;癫痫	未愈	严纯雪	金江兵	薛超超
34	A04(儿童icu)	2020-08-01	2020-08-01	3003352	郑博	男	4Y	蛛网膜下腔出血	失血性休克;急性失血性贫血;头皮血肿;心脏停搏复苏成功;枕骨骨折;心脏骤停;肺挫伤	死亡	南向珍	娄鹏程	娄鹏程
35	A04(儿童icu)	2020-08-01	2020-08-04	3004476	何冠纬	男	1Y	脑挫伤	肝损伤;颅内出血;中度贫血;尿崩症;眶骨骨折;头皮血肿;肺挫伤;股骨骨折;颅骨骨折;视神经损伤	未愈	南向珍	梁亚峰	梁亚峰
36	A04(儿童icu)	2020-08-09	2020-08-09	3006491	刘梓恒	男	4Y	脑疝	颅腔积气;颅内出血;慢性失血性贫血;头皮血肿;肺挫伤;脑挫伤;颅骨骨折	未愈	严纯雪	金江兵	卢露	皮肤和皮下坏死组织切除清创术
37	A04(儿童icu)	2020-08-09	2020-08-11	3007205	刘梓恒	男	4Y	脑挫伤	颅腔积气;颅内出血;头皮血肿;肺挫伤;颅骨骨折;腹水;脑疝;肾上腺出血	未愈	严纯雪	金江兵	卢露
38	A04(儿童icu)	2020-08-18	2020-08-31	3013981	徐语涵	女	3Y	肺挫伤	肝损伤;肌腱和肌肉损伤;先天性寰枢椎畸形;肋骨骨折;腹水;气胸	治愈	严纯雪	王林霞	卢露
39	A04(儿童icu)	2020-09-04	2020-09-09	3016657	吴欣月	女	2Y	脑挫伤	肝损伤;肌腱和肌肉损伤;多发性损伤;硬膜下血肿;头皮血肿;肺挫伤;颅骨骨折;蛛网膜下腔出血;硬脑膜下积液	好转	严纯雪	金江兵	唐震海
40	A04(儿童icu)	2020-09-14	2020-09-26	3021926	骆涵垟	男	12Y	颅骨骨折	创伤性脊椎病;多发性损伤;颅内损伤;牙槽骨骨折;颅内出血;肺挫伤;脑发育不全;癫痫	好转	南向珍	叶小姣	叶小姣	上颌骨骨折切开复位固定术
41	A04(儿童icu)	2020-10-22	2020-10-25	3031475	刘旭航	男	9Y	腹部损伤	膀胱损伤;创伤性尿道断裂;腹水;骨盆骨折	未愈	南向珍	叶小姣	叶小姣	膀胱造口术
42	A04(儿童icu)	2020-10-26	2020-11-10	3036796	王子航	男	3Y	多发性损伤	蛛网膜下腔出血;肺挫伤;鹰嘴骨折;髂骨骨折;下颌骨骨折;腹水;肝病	治愈	严纯雪	王林霞	卢露	下颌骨骨折切开复位内固定术;尺骨骨折切开复位术
43	A05儿科内分泌	2020-03-13	2020-03-17	2959857	阮渝淇	女	1Y	肺炎	锁骨骨折	治愈	单小鸥	罗越	吴慧平
44	A05儿科内分泌	2020-09-20	2020-09-27	3022379	李诊慧	女	5Y	病毒性脑炎	急性上呼吸道感染;脑挫伤;内踝骨折	好转	单小鸥	吴慧平	曹顺顺
45	A06(儿神)	2020-09-23	2020-09-25	3021644	刘志强	男	5Y	癫痫	特指惊厥;桡骨骨折	好转	叶秀云	郑飞霞	715620
46	A06(儿神)	2020-10-21	2020-10-30	3032978	林栋	男	10Y	Lennox-Gastaut综合征	急性上呼吸道感染;开放性多发性损伤;脑挫伤;硬膜外血肿;蛛网膜下腔出血;跟骨骨折;肌腱和肌肉损伤	好转	林忠东	张崇晓	张崇晓
47	A07(儿消)	2020-03-19	2020-04-02	2964912	周盛哲	男	6Y	急性创伤性胰腺炎，轻症	开放性股骨骨折;皮肤挫伤;蛛网膜下腔出血;腹水;上颌骨骨折;颧骨骨折;眶骨骨折;脑挫伤;肺挫伤;头皮裂伤;眼睑裂伤	好转	朱欢	朱欢	方玲娟
48	A07(儿消)	2020-08-03	2020-09-09	3016789	戴依婷	女	3Y	急性创伤性胰腺炎，轻症	小腿骨折;肝损伤;急性支气管炎;腹水;肱骨骨折;股骨骨折;颈椎脱位;肺挫伤;头皮血肿;皮肤挫伤;多发性胸椎骨折	好转	朱欢	卢华君	张雪雅
49	A09(儿肾)	2020-03-29	2020-04-15	2968931	胡鹏	男	10Y	肾病综合征	骨质疏松伴病理性骨折;急性上呼吸道感染	好转	庄捷秋	陈敏广	陈敏广
50	A09(儿肾)	2020-09-28	2020-10-09	3025995	谷广	男	9Y	链球菌感染	慢性鼻窦炎;反应性关节病;骨折治疗后恢复期	好转	郑雯洁	叶晓华	叶晓华
51	A10(儿血)	2020-01-30	2020-02-04	2947818	汤让毅	男	1Y	淋巴结炎	锁骨骨折	治愈	周海霞	周海霞	胡玲珑
52	B03儿科综合	2020-07-23	2020-07-30	3003139	王舒晨	女	4Y	败血症	肱骨髁上骨折	好转	金益梅	革丽莎	王雯雯
53	B03儿科综合	2020-10-08	2020-10-11	L0131311	罗双	女	7Y	急性支气管炎	特指手术后状态;骨折治疗后恢复期	治愈	何时军	林苗苗	林苗苗
54	B05儿科呼吸	2020-03-09	2020-03-12	L0121556	童思源	男	3Y	肺炎支原体性肺炎	锁骨骨折	治愈	张维溪	张维溪	张乐乐	纤维支气管镜检查
55	C03眼科口腔	2019-12-25	2020-01-05	2938206	林建敏	男	42Y	取除骨折内固定装置		其他	肖进	肖进	721015	下颌骨内固定物取出术
56	C03眼科口腔	2019-12-03	2020-01-06	2938572	陈传富	男	25Y	眶骨骨折	颅腔积气;尺骨茎突骨折;桡骨下端骨折;创伤性硬膜外出血;视神经损伤;面部挫伤;肺挫伤;创伤性蛛网膜下腔出血;脑挫伤;耻骨骨折;鼻骨骨折;颅底骨折;额骨骨折	治愈	郑海华	韩晓晖	林达	踝关节骨折切开复位螺钉内固定术;视神经减压术;桡骨骨折切开复位钢板内固定术;鼻骨骨折闭合复位术;一个眶壁减压术;眶骨骨折切开复位术
57	C03眼科口腔	2019-12-12	2020-01-08	2939147	陈晓峰	男	45Y	颧骨骨折	颅腔积气;额骨骨折;眶骨骨折;眼损伤	治愈	肖进	肖进	721015	颧骨骨折切开复位内固定术;上颌骨骨折切开复位固定术;眶骨骨折切开复位术
58	C03眼科口腔	2019-12-29	2020-01-08	2939246	王思琦	女	4Y	取除骨折内固定装置		其他	肖进	肖进	721015	下颌骨内固定物取出术
59	C03眼科口腔	2020-01-01	2020-01-08	2939276	王宇	男	20Y	下颌骨骨折		好转	肖进	肖进	721015	下颌骨骨折切开复位内固定术
60	C03眼科口腔	2020-01-06	2020-01-09	2939298	曾云宝	男	49Y	取除骨折内固定装置	高血压病	其他	陈龙	陈龙	金海东	胫骨内固定物取出术
61	C03眼科口腔	2019-12-29	2020-01-09	2939431	戴乐和	男	58Y	颧骨骨折	眶骨骨折;上颌骨骨折	好转	肖进	肖进	721015	眶骨骨折切开复位术;颧骨骨折切开复位内固定术;上颌骨骨折切开复位固定术
62	C03眼科口腔	2020-01-06	2020-01-13	2940477	林良德	男	60Y	眼撕脱伤	眶骨骨折;泪小管断裂;视神经损伤;面部裂伤	治愈	郑海华	杨顺海	林达	角膜裂伤缝合术;内眦成形术;眼球摘除术;眼睑裂伤缝合术
63	C03眼科口腔	2020-01-01	2020-01-13	2940550	丁雷	男	30Y	创伤性足趾切断	踝和足水平特指血管损伤;踝和足水平特指神经损伤;足趾挤压伤;跖骨骨折	好转	余可和	余可和	余可和	趾骨开放性骨折清创术;跖骨骨折切开复位钢板内固定术;趾骨骨折切开复位钢针内固定术;截断残端的修正术
64	C03眼科口腔	2020-01-11	2020-01-15	2941299	骆开福	男	47Y	取除骨折内固定装置		其他	郑海华	韩晓晖	林达	面骨内固定物取出术
65	C03眼科口腔	2020-01-11	2020-01-15	2941399	陈素文	女	51Y	外伤性白内障	高血压病;眶骨骨折	治愈	郑海华	冯旺强	林达	白内障超声乳化抽吸术;人工晶体置入术
66	C03眼科口腔	2020-01-10	2020-01-21	2943148	高青山	男	53Y	颧骨骨折		治愈	肖进	肖进	721015	颧骨骨折切开复位内固定术
67	C03眼科口腔	2020-01-21	2020-01-23	2943611	孙庆喜	男	50Y	眼睑裂伤	鼻骨骨折;泪小管裂伤	治愈	蔡剑秋	夏哲人	陈婕灵	眼睑裂伤缝合术;泪小管吻合术;鼻泪管插管术
68	C03眼科口腔	2019-12-30	2020-01-25	2944315	杨光英	女	48Y	多发性面骨骨折	上颌骨骨折;眶骨骨折;颧骨骨折	好转	肖进	肖进	721015	颧骨骨折切开复位内固定术;眶骨骨折切开复位术;上颌骨骨折切开复位固定术
69	C03眼科口腔	2020-01-18	2020-01-27	2945007	廖集保	男	42Y	取除骨折内固定装置	肾结石;胆囊息肉;脂肪肝	其他	赵友明	赵友明	郭伟军	股骨内固定物取出术
70	C03眼科口腔	2020-01-26	2020-01-29	2945476	潘俊全	男	12Y	取除骨折内固定装置		其他	陈华	陈华	余贤斌	锁骨内固定物取出术
71	C03眼科口腔	2020-01-03	2020-01-29	2945514	郑红	男	37Y	眼球破裂	面部裂伤;眶骨骨折;鼻骨骨折;玻璃体出血;上睑下垂;心律失常;前房积血;特指视网膜脱离;无晶状体;虹膜损伤	治愈	郑海华	冯旺强	林达	面部清创缝合术;前房冲洗术;前入路玻璃体切除术;视网膜剥离术;视网膜脱离复位术;眼球裂伤缝合
72	C03眼科口腔	2020-01-25	2020-02-01	2946405	王春进	男	48Y	眼球破裂	前房积血;眶骨骨折;结膜出血	好转	郑穗联	夏哲人	陈婕灵	眼球摘除伴义眼台置入术
73	C03眼科口腔	2020-01-20	2020-02-01	2946916	陈定华	男	39Y	眶骨骨折	上颌骨骨折;颧骨骨折	治愈	肖进	肖进	721015	眶骨骨折切开复位术;上颌骨骨折切开复位固定术;颧骨骨折切开复位内固定术
74	C03眼科口腔	2020-01-22	2020-02-02	2946955	武加华	男	41Y	眶骨骨折	面部软组织挫伤;颧骨骨折	好转	郑海华	韩晓晖	林达	眶骨骨折切开复位术;颧骨骨折切开复位内固定术
75	C03眼科口腔	2020-01-27	2020-02-03	2947669	王正	男	40Y	眼球破裂	眼睑裂伤;眼睑异物;颅底骨折;泪小管断裂;颅腔积气;眶骨骨折	治愈	蔡剑秋	夏哲人	陈婕灵	眼球内容物剜出术;泪小管吻合术;泪小管探通术;内眦成形术;外眦成形术;皮肤及皮下组织清创术;眼睑缝合术
76	C03眼科口腔	2020-01-11	2020-02-06	2949042	戴成省	男	32Y	眼球破裂	眶骨骨折;颅底骨折;胸腔积液;陈旧性肺结核;颅腔积气;失血性休克;多发性面骨骨折;舌裂伤;面部软组织挫伤;口腔浅表损伤;肺功能检查异常结果;视神经损伤;眼睑异物;眼睑裂伤;颈椎骨折	好转	肖进	肖进	721015	眶骨骨折切开复位术;眼内容物剜出伴巩膜内填充;眼睑裂伤缝合术;下颌骨骨折切开复位内固定术;上颌骨骨折切开复位固定术;颧骨骨折切开复位内固定术
77	C03眼科口腔	2020-02-02	2020-02-15	2950323	杨顺权	男	40Y	下颌骨骨折	牙槽骨骨折	治愈	肖进	肖进	721015	下颌骨骨折切开复位内固定术;牙槽骨折切开复位内固定术
78	C03眼科口腔	2020-02-09	2020-02-16	2950559	张郑钟	男	23Y	眼球破裂	鼻骨骨折;癫痫;眼睑裂伤	治愈	蔡剑秋	夏哲人	陈婕灵	眼睑缝合术;眼球摘除术伴植入物置入术
79	C03眼科口腔	2020-02-14	2020-02-17	2950773	黄强林	男	17Y	下颌骨骨折		好转	肖进	肖进	721015
80	C03眼科口腔	2020-02-15	2020-02-19	2951419	董怀存	男	60Y	眶骨骨折	颧骨骨折;翼状胬肉;白内障	好转	郑海华	韩晓晖	林达	眶骨骨折切开复位术
81	C03眼科口腔	2020-02-12	2020-02-24	2953034	周月寅	男	43Y	多发性面骨骨折	眶骨骨折;颧骨骨折;上颌骨骨折	治愈	肖进	肖进	721015	颧骨骨折切开复位内固定术;眶骨骨折切开复位术;上颌骨骨折切开复位固定术
82	C03眼科口腔	2020-02-16	2020-02-25	2953330	谷团伟	男	33Y	多发性面骨骨折	眶骨骨折;颧骨骨折;上颌骨骨折	治愈	肖进	肖进	721015	眶骨骨折切开复位术;上颌骨骨折切开复位固定术;颧骨骨折切开复位内固定术
83	C03眼科口腔	2020-02-19	2020-03-01	2954892	李侨	男	27Y	上颌骨骨折	颧骨骨折	治愈	肖进	肖进	721015	上颌骨骨折切开复位固定术;颧骨骨折切开复位内固定术
84	C03眼科口腔	2020-02-26	2020-03-01	2954970	温兴妙	男	27Y	眼球破裂	面部损伤;结膜出血;结膜裂伤;眶骨骨折;视神经损伤	好转	郑海华	董志章	林达	结膜缝合术;眼睑切开探查术;眼睑板层裂伤修补术;外眦成形术
85	C03眼科口腔	2020-02-26	2020-03-02	2955024	李陈丫	女	28Y	取除骨折内固定装置		其他	肖进	肖进	721015	下颌骨内固定物取出术
86	C03眼科口腔	2020-02-17	2020-03-02	2955136	王正	男	40Y	眼球破裂	眶骨骨折;上睑下垂;眼球摘除术后状态	治愈	蔡剑秋	夏哲人	陈婕灵	眶骨骨折切开复位术;义眼台二期置入术
87	C03眼科口腔	2020-02-19	2020-03-07	2956593	董昕琦	女	7Y	下颌骨骨折		治愈	肖进	肖进	721015	下颌骨骨折切开复位内固定术
88	C03眼科口腔	2020-02-27	2020-03-07	2956803	陈怡然	女	3Y	下颌骨骨折		治愈	肖进	肖进	721015	下颌骨骨折切开复位内固定术
89	C03眼科口腔	2020-02-26	2020-03-08	2957052	雷炳芝	女	54Y	动眼神经损伤	眶骨骨折;眼球挫伤;视神经损伤	好转	郑海华	董志章	林达
90	C03眼科口腔	2020-02-15	2020-03-09	2957367	陈开真	男	51Y	消化道穿孔	头部外伤;急性弥漫性腹膜炎;休克;下颌骨骨折	治愈	肖进	肖进	王兆洪	剖腹探查术;下颌骨骨折切开复位内固定术;小肠部分切除术;腹腔脓肿切开引流术
91	C03眼科口腔	2020-02-21	2020-03-14	2959013	陈飞雪	女	39Y	眶骨骨折	眼睑闭合不全;面部软组织挫伤;屈光不正;肋骨骨折	好转	郑海华	韩晓晖	林达	眶骨骨折切开复位术
92	C03眼科口腔	2020-03-07	2020-03-14	2959030	宋荣潘	男	41Y	眶骨骨折		治愈	郑海华	韩晓晖	林达	眶骨骨折切开复位术
93	C03眼科口腔	2020-02-25	2020-03-15	2959419	黄承谊	男	18Y	下颌骨骨折	腹腔积血;桡骨下端骨折;应激性溃疡;腹部损伤;肺挫伤;肝损伤	治愈	肖进	肖进	721015	下颌骨骨折切开复位内固定术
94	C03眼科口腔	2020-03-02	2020-03-16	2959490	赵玉眉	女	64Y	下颌骨骨折	上颌骨骨折	治愈	肖进	肖进	721015	上颌骨骨折切开复位固定术;下颌骨骨折切开复位内固定术
95	C03眼科口腔	2020-03-07	2020-03-16	2959528	林长平	男	38Y	泪小管裂伤	先天性眼睑缺如;颞骨骨折;脑挫伤;颧骨骨折;眼睑裂伤	治愈	郑海华	杨顺海	林达	泪小管成形术;眼睑裂伤缝合术;鼻泪管插管术
96	C03眼科口腔	2020-03-11	2020-03-17	2959773	徐梦涵	女	1Y	取除骨折内固定装置		其他	肖进	肖进	721015	下颌骨内固定物取出术
97	C03眼科口腔	2020-03-08	2020-03-17	2959947	李祖军	男	34Y	跟骨骨折		治愈	洪建军	陈鸿亮	陈鸿亮	跟骨骨折切开复位钢板内固定术
98	C03眼科口腔	2020-03-09	2020-03-21	2960847	项光师	男	50Y	跖骨骨折	楔状骨骨折(足);小腿开放性损伤	治愈	郑海华	韩晓晖	林达	跖骨骨折切开复位钢针内固定术;人工晶体置入术;白内障超声乳化抽吸术
99	C03眼科口腔	2020-03-14	2020-03-22	2961533	陈春柳	女	37Y	眶骨骨折		治愈	郑海华	韩晓晖	林达	眶骨骨折切开复位术
100	C03眼科口腔	2020-03-21	2020-03-22	2961546	李样样	女	52Y	上睑下垂	眶骨骨折;第三[动眼]神经麻痹	好转	郑海华	韩晓晖	林达
101	C03眼科口腔	2020-03-08	2020-03-24	2961921	梁旺财	男	30Y	取除骨折内固定装置		其他	肖进	肖进	721015	面骨内固定物取出术;鼻重建术;肋骨植骨术
102	C03眼科口腔	2020-03-16	2020-03-25	2962427	温兴妙	男	27Y	多发性面骨骨折		治愈	肖进	肖进	721015	上颌骨骨折切开复位固定术
103	C03眼科口腔	2020-03-05	2020-03-29	2963674	吴秀富	男	50Y	创伤性硬膜外出血	眼睑裂伤;创伤性蛛网膜下腔出血;肋骨骨折;面骨骨折;晶状体脱位;虹膜离断	治愈	郑海华	冯旺强	林达	硬脑膜外血肿清除术;颅骨切除减压术;眼睑裂伤缝合术;内眦成形术;眼睑缝合术;局部皮瓣转位眼睑重建术
104	C03眼科口腔	2020-03-28	2020-03-30	2964012	孙凯	男	15Y	下颌骨骨折		未愈	肖进	肖进	721015
105	C03眼科口腔	2020-03-21	2020-03-31	2964393	林长平	男	36Y	眼睑裂伤	颞骨骨折;眼睑特指疾患;泪小管裂伤;脑挫伤;颧骨骨折	治愈	郑海华	董志章	林达	内眦成形术;泪小管吻合术;鼻泪管插管术
106	C03眼科口腔	2020-03-23	2020-04-03	2965238	林绍淼	男	25Y	眶骨骨折	眼损伤;腕骨骨折;掌骨骨折;头部外伤	治愈	郑海华	韩晓晖	林达	眶骨骨折切开复位术
107	C03眼科口腔	2020-03-25	2020-04-05	2965376	林琴娟	女	44Y	泪小管裂伤	眼球挫伤;面部裂伤;腓骨骨折	治愈	蔡剑秋	夏哲人	陈婕灵	内眦成形术;面部清创缝合术
108	C03眼科口腔	2020-03-29	2020-04-05	2965601	林巧君	男	32Y	取除骨折内固定装置		其他	肖进	肖进	721015	面骨内固定物取出术
109	C03眼科口腔	2020-03-28	2020-04-06	2966013	杨赛龙	男	26Y	下颌骨骨折		治愈	肖进	肖进	721015	下颌骨骨折切开复位内固定术
110	C03眼科口腔	2020-03-12	2020-04-07	2966247	陈秀平	女	46Y	多发性面骨骨折	鼻骨骨折;颞骨骨折;胸腔积液;单纯性肾囊肿;肾结石;皮肤挫伤;肺挫伤;锁骨骨折;肋骨骨折;颈椎骨折;眶骨骨折;颧骨骨折;上颌骨骨折	治愈	郑海华	韩晓晖	林达	颧骨骨折切开复位内固定术;锁骨骨折切开复位钢板内固定术;鼻骨骨折切开复位术;上颌骨骨折切开复位固定术;眶骨骨折切开复位术
111	C03眼科口腔	2020-04-05	2020-04-09	2967050	章成松	男	66Y	跖骨骨折		治愈	张宇	陈成旺	陈成旺	跖骨骨折切开复位钢板内固定术
112	C03眼科口腔	2020-04-06	2020-04-11	2967287	林运顺	男	37Y	取除骨折内固定装置	乙型病毒性肝炎	其他	余可和	余可和	余可和	踝关节内固定物取出术
113	C03眼科口腔	2020-03-27	2020-04-14	2968559	梁专峰	男	48Y	泪小管裂伤	眼睑裂伤;腰椎骨折;眶骨骨折	治愈	郑海华	韩晓晖	林达	泪小管吻合术;鼻泪管插管术;眶骨骨折切开复位术
114	C03眼科口腔	2020-04-02	2020-04-15	2968948	杜世华	男	37Y	多发性面骨骨折	面部软组织挫伤	治愈	郑海华	韩晓晖	林达	颧骨骨折切开复位内固定术;上颌骨骨折切开复位固定术
115	C03眼科口腔	2020-03-30	2020-04-20	2970357	陈丐勇	男	35Y	眼球穿通伤伴异物	上睑下垂;继发性视网膜脱离;外伤性白内障;眶骨骨折;玻璃体出血	治愈	郑海华	董志章	林达	虹膜周边切除术;眼内异物取出术;白内障超声乳化抽吸术;前入路玻璃体切除术;视网膜脱离复位术;视网膜激光凝固术;玻璃体硅油置入术,用于视网膜再附着
116	C03眼科口腔	2020-04-06	2020-04-21	2970483	陈福臣	男	60Y	颧骨骨折		未愈	肖进	肖进	721015
117	C03眼科口腔	2020-04-21	2020-04-22	2971113	王彩萍	女	59Y	闭合性胫骨平台骨折	膝关节副韧带扭伤	未愈	黄义星	黄义星	罗鹏
118	C03眼科口腔	2020-04-16	2020-04-22	2971143	周志宏	男	62Y	取除骨折内固定装置		其他	肖进	肖进	721015	面骨内固定物取出术
119	C03眼科口腔	2020-03-25	2020-04-22	2971157	翁结义	男	48Y	眼球破裂	眶骨骨折;面部裂伤;眼睑裂伤;继发性视网膜脱离;眼内出血;鼻损伤	好转	郑穗联	夏哲人	陈婕灵	视网膜脱离复位术;眼睑裂伤缝合术;面部清创术;前入路玻璃体切除术;视网膜激光凝固术;眶骨骨折切开复位术;眼球裂伤缝合;鼻清创术
120	C03眼科口腔	2020-03-13	2020-04-22	2971170	尹露	男	22Y	眼损伤	眼球挫伤;眶骨骨折	治愈	郑海华	韩晓晖	林达	眼睑板层伴睑缘重建术;眶骨骨折切开复位术
121	C03眼科口腔	2020-04-18	2020-04-25	2971859	周世美	女	7Y	取除骨折内固定装置		其他	肖进	肖进	721015	面骨内固定物取出术
122	C03眼科口腔	2020-04-11	2020-04-25	2971861	刘帅民	男	25Y	多发性面骨骨折	眶骨骨折;颧骨骨折;上颌骨骨折	治愈	郑海华	韩晓晖	林达	眶骨骨折切开复位术;颧骨骨折切开复位术;上颌骨骨折切开复位术
123	C03眼科口腔	2020-04-13	2020-04-25	2971889	白洪锡	男	72Y	多发性面骨骨折	面部软组织挫伤;多发性肋骨骨折;眶骨骨折;颧骨骨折	治愈	郑海华	韩晓晖	林达	眶骨骨折切开复位术;颧骨骨折切开复位内固定术
124	C03眼科口腔	2020-03-29	2020-04-25	2971900	高廷昌	男	53Y	颧骨骨折		治愈	肖进	肖进	721015
125	C03眼科口腔	2020-03-31	2020-04-25	2971942	杨三妹	女	78Y	眼球破裂	无晶状体;玻璃体损伤;虹膜损伤;面部软组织挫伤;2型糖尿病;基底节脑梗死;视神经损伤;创伤性蛛网膜下腔出血;眶骨骨折;继发性视网膜脱离;高血压病	好转	郑海华	冯旺强	林达	视网膜脱离复位术;玻璃体硅油置入术,用于视网膜再附着;眼球裂伤缝合;前房成形术;前入路玻璃体切割术
126	C03眼科口腔	2020-04-20	2020-04-28	2972890	吴书军	男	43Y	视网膜损伤	晶状体不全脱位;外伤性白内障;眼球挫伤;眼睑裂伤;眶骨骨折;鼻骨骨折;玻璃体出血;继发性视网膜脱离	治愈	郑穗联	夏哲人	陈婕灵	前入路玻璃体切割术;玻璃体硅油置入术,用于视网膜再附着;视网膜脱离复位术;视网膜激光凝固术;白内障超声乳化抽吸术
127	C03眼科口腔	2020-04-22	2020-04-29	2973134	董建昊	男	10Y	取除骨折内固定装置		其他	肖进	肖进	721015	面骨内固定物取出术
128	C03眼科口腔	2020-04-25	2020-04-29	2973430	周色苗	女	31Y	眶骨骨折	眼球挫伤;上颌骨骨折	治愈	郑海华	韩晓晖	林达	眶骨骨折切开复位术;上颌骨骨折切开复位固定术
129	C03眼科口腔	2020-04-25	2020-04-30	2973503	孙佳佳	女	8Y	取除骨折内固定装置		其他	肖进	肖进	721015	面骨内固定物取出术
130	C03眼科口腔	2020-04-06	2020-04-30	2973707	戴吉林	男	54Y	颧骨骨折	眶骨骨折	好转	肖进	肖进	721015	颧骨骨折切开复位内固定术;眶骨骨折切开复位术
131	C03眼科口腔	2020-05-05	2020-05-13	2977648	常聪会	女	32Y	跟骨骨折		治愈	余可和	余可和	余可和	跟骨骨折闭合复位螺钉内固定术
132	C03眼科口腔	2020-05-11	2020-05-14	2977987	高青山	男	54Y	取除骨折内固定装置		其他	肖进	肖进	721015	面骨内固定物取出术
133	C03眼科口腔	2020-05-02	2020-05-16	2978509	张一航	男	9Y	下颌骨骨折	面部损伤;皮肤挫伤;脾损伤;腹水	未愈	肖进	肖进	梁亚峰
134	C03眼科口腔	2020-04-29	2020-05-18	2979135	陈方肖	男	57Y	鹰嘴骨折	舌损伤;单纯性肾囊肿;肾结石;面部裂伤;肩胛骨骨折;肋骨骨折;下颌骨骨折;肺大泡	治愈	肖进	肖进	721015	尺骨骨折切开复位钢板内固定术;下颌骨骨折切开复位内固定术
135	C03眼科口腔	2020-05-14	2020-05-20	2979679	戴金燕	女	32Y	取除骨折内固定装置		其他	肖进	肖进	721015	下颌骨内固定物取出术
136	C03眼科口腔	2020-05-18	2020-05-21	2980207	黄凯	男	28Y	颧骨骨折	眶骨骨折	未愈	肖进	肖进	721015
137	C03眼科口腔	2020-05-18	2020-05-21	2980270	马永会	女	46Y	取除骨折内固定装置		其他	陈龙	陈龙	陈龙	髌骨内固定物取出术
138	C03眼科口腔	2020-05-13	2020-05-23	2980698	王佳飞	男	28Y	取除骨折内固定装置		其他	肖进	肖进	721015	面骨内固定物取出术
139	C03眼科口腔	2020-05-13	2020-05-23	2980720	黄贵新	男	50Y	取除骨折内固定装置		其他	肖进	肖进	721015	下颌骨内固定物取出术
140	C03眼科口腔	2020-05-19	2020-05-23	2980803	黄美兰	女	51Y	取除骨折内固定装置	纤维囊性乳腺病;肾结石;胆囊息肉	其他	黄俊武	黄俊武	胡炜	踝关节内固定物取出术
141	C03眼科口腔	2020-05-07	2020-05-24	2981002	金海东	男	28Y	上颌骨骨折	牙槽骨骨折;皮肤挫伤;眼睑裂伤;下颌骨骨折	治愈	肖进	肖进	721015	上颌骨骨折切开复位术;下颌骨骨折切开复位内固定术
142	C03眼科口腔	2020-05-07	2020-05-24	2981214	方红超	男	56Y	创伤性蛛网膜下腔出血	鼻骨骨折;上颌骨骨折;头皮血肿;皮肤挫伤;多发性面骨骨折	治愈	肖进	肖进	721015	上颌骨骨折切开复位固定术
143	C03眼科口腔	2020-05-23	2020-05-26	2981877	莫林兴	男	22Y	取除骨折内固定装置		其他	郑海华	韩晓晖	林达	面骨内固定物取出术
144	C03眼科口腔	2020-05-16	2020-05-27	2982114	李新建	男	40Y	下颌骨骨折		治愈	肖进	肖进	721015	下颌骨骨折切开复位内固定术
145	C03眼科口腔	2020-05-27	2020-05-28	2982384	刘有胜	男	42Y	颧骨骨折		未愈	肖进	肖进	721015
146	C03眼科口腔	2020-05-13	2020-05-28	2982444	陈南秋	男	41Y	颧骨骨折		治愈	肖进	肖进	721015	颧骨骨折切开复位内固定术
147	C03眼科口腔	2020-05-18	2020-05-30	2983066	林添	男	26Y	取除骨折内固定装置		其他	肖进	肖进	721015	面骨内固定物取出术;下颌骨钛板置入术
148	C03眼科口腔	2020-05-22	2020-05-31	2983249	朱龙薇	女	5Y	下颌骨骨折		好转	肖进	肖进	721015	下颌骨骨折切开复位内固定术;副耳切除术
149	C03眼科口腔	2020-05-13	2020-05-31	2983494	郑祥辉	男	70Y	下颌骨骨折		好转	肖进	肖进	721015	下颌骨骨折切开复位内固定术
150	C03眼科口腔	2020-05-24	2020-05-31	2983510	王浩源	男	19Y	开放性眶骨骨折	面部软组织挫伤;面骨骨折	治愈	郑海华	韩晓晖	林达	眶骨骨折切开复位术
151	C03眼科口腔	2020-05-23	2020-06-01	2983579	王良远	男	48Y	取除骨折内固定装置		其他	郑海华	韩晓晖	林达	面骨内固定物取出术
152	C03眼科口腔	2020-05-16	2020-06-02	2983909	项厚威	男	20Y	眼球穿通伤	泪小管裂伤;虹膜损伤;多发性面骨骨折;外伤性白内障;眼挫伤;眶骨骨折;额骨骨折;继发性视网膜脱离;前房积血;颅腔积气;前臂特指伸肌和肌腱损伤;开放性尺骨骨折;玻璃体损伤	好转	郑海华	韩晓晖	林达	尺骨骨折切开复位钢板内固定术;后入路玻璃体切割术;眼球裂伤缝合;皮肤和皮下坏死组织切除清创术;伸腕肌腱缝合术
153	C03眼科口腔	2020-05-22	2020-06-03	2984526	林作康	男	49Y	眼球挫伤	单眼白内障;鼻骨骨折;晶状体脱位;虹膜离断	治愈	蔡剑秋	查屹	陈婕灵	前入路玻璃体切除术;虹膜修补术;白内障囊外摘除术
154	C03眼科口腔	2020-05-30	2020-06-04	2984622	王君	男	26Y	取除骨折内固定装置		其他	余可和	余可和	余可和	掌骨内固定物取出术
155	C03眼科口腔	2020-05-31	2020-06-05	2984921	洪丽霞	女	39Y	取除骨折内固定装置		其他	黄俊武	黄俊武	胡炜	胫骨内固定物取出术
156	C03眼科口腔	2020-05-31	2020-06-06	2985108	林元国	男	19Y	取除骨折内固定装置		其他	黄俊武	黄俊武	胡炜	胫骨内固定物取出术
157	C03眼科口腔	2020-05-31	2020-06-06	2985135	黄传宝	男	52Y	陈旧性踝骨骨折	特指手术后状态	治愈	黄俊武	黄俊武	胡炜	胫骨内固定物取出术;踝关节骨折切开复位螺钉内固定术
158	C03眼科口腔	2020-05-31	2020-06-06	2985145	叶振章	男	54Y	取除骨折内固定装置		其他	黄俊武	黄俊武	胡炜	锁骨内固定物取出术
159	C03眼科口腔	2020-05-31	2020-06-06	2985237	宋素芹	女	39Y	取除骨折内固定装置		其他	黄俊武	黄俊武	胡炜	髌骨内固定物取出术
160	C03眼科口腔	2020-05-31	2020-06-07	2985486	季统进	男	49Y	取除骨折内固定装置		其他	黄俊武	黄俊武	胡炜	髌骨内固定物取出术
161	C03眼科口腔	2020-05-30	2020-06-07	2985718	叶爱香	女	77Y	股骨粗隆间骨折	高血压病	治愈	王振文	水小龙	水小龙	股骨骨折闭合复位髓内针内固定术
162	C03眼科口腔	2020-05-19	2020-06-08	2983593	吕选余	男	59Y	肱骨上端骨折	肋骨骨折;特指手术后状态	治愈	余可和	余可和	余可和	肱骨骨折切开复位钢板内固定术
163	C03眼科口腔	2020-05-20	2020-06-08	2986103	何永立	男	47Y	取除骨折内固定装置		其他	肖进	肖进	721015	下颌骨内固定物取出术
164	C03眼科口腔	2020-05-23	2020-06-08	2986150	张磊	男	24Y	脑挫伤	面部软组织挫伤;头部外伤;头皮血肿;眶骨骨折;颧骨骨折;上颌骨骨折;颞骨骨折;额骨骨折;颅腔积气	治愈	肖进	肖进	721015	上颌骨骨折切开复位固定术;眶骨骨折切开复位术;颧骨骨折切开复位内固定术
165	C03眼科口腔	2020-06-09	2020-06-13	2987237	郭云亮	男	42Y	泪小管裂伤	眼睑裂伤;眶骨骨折	治愈	蔡剑秋	夏哲人	陈婕灵	泪小管吻合术;鼻泪管插管术;眼睑裂伤缝合术
166	C03眼科口腔	2020-04-29	2020-06-15	2976977	吴国红	男	43Y	股骨骨折	颞下颌关节脱位;肺部阴影;肘关节脱位;桡骨骨折;上颌骨骨折;下颌骨骨折;特指手术后状态;多发性足骨折;牙槽骨骨折	好转	肖进	肖进	721015	尺骨骨折切开复位钢板内固定术;下颌骨骨折切开复位内固定术;桡骨骨折切开复位钢板内固定术;股骨骨折切开复位钢板内固定术
167	C03眼科口腔	2020-06-02	2020-06-15	2987995	安守育	男	47Y	眶骨骨折	小腿挫伤	治愈	郑海华	韩晓晖	林达	眶骨骨折切开复位术
168	C03眼科口腔	2020-06-01	2020-06-16	2988197	刘有胜	男	42Y	颧骨骨折		治愈	肖进	肖进	721015	颧骨骨折切开复位内固定术
169	C03眼科口腔	2020-06-13	2020-06-17	2988719	黄金周	男	40Y	取除骨折内固定装置	脂肪肝	其他	陈龙	陈龙	应晓洲	锁骨内固定物取出术
170	C03眼科口腔	2020-06-13	2020-06-17	2988778	金松翠	女	64Y	取除骨折内固定装置	高血压病;2型糖尿病	其他	陈龙	陈龙	应晓洲	锁骨内固定物取出术
171	C03眼科口腔	2020-06-14	2020-06-17	2988784	黄舒舒	男	35Y	取除骨折内固定装置		其他	黄俊武	黄俊武	胡炜	掌骨内固定物取出术
172	C03眼科口腔	2020-06-13	2020-06-20	2989337	章育明	男	63Y	取除骨折内固定装置	高血压病	其他	陈龙	陈龙	应晓洲	锁骨内固定物取出术
173	C03眼科口腔	2020-06-07	2020-06-20	2989569	徐君弟	男	54Y	下颌骨骨折		治愈	肖进	肖进	721015	下颌骨骨折切开复位内固定术
174	C03眼科口腔	2020-06-15	2020-06-20	2989572	董永霞	女	46Y	取除骨折内固定装置		其他	翁益民	翁益民	翁益民	股骨内固定物取出术
175	C03眼科口腔	2020-05-26	2020-06-20	2989643	骆名强	男	52Y	眼球破裂	盲，单眼;眶骨骨折;颧骨骨折;中耳炎	治愈	郑海华	韩晓晖	林达	眼球裂伤缝合;眶骨骨折切开复位术;上颌骨骨折切开复位固定术;颧骨骨折切开复位内固定术
176	C03眼科口腔	2020-06-06	2020-06-22	2990173	简祖浩	男	26Y	眼球穿通伤	浆液性视网膜脱离;前房积血;玻璃体损伤;晶状体损伤;眼球破裂;眶骨骨折;脉络膜脱离	好转	郑海华	董志章	林达	前入路玻璃体切除术;后入路玻璃体切割术;眼球裂伤缝合;玻璃体腔药物注射术;前房冲洗术
177	C03眼科口腔	2020-06-15	2020-06-22	2990304	傅刚炜	男	25Y	取除骨折内固定装置		其他	陈龙	陈龙	应晓洲	跟骨内固定物取出术
178	C03眼科口腔	2020-06-13	2020-06-22	2990336	杨元静	女	21Y	眶骨骨折	眼球挫伤;上颌骨骨折	治愈	郑海华	韩晓晖	林达	眶骨骨折切开复位术
179	C03眼科口腔	2020-06-14	2020-06-23	2990734	邵乐鹊	男	21Y	下颌骨骨折		治愈	肖进	肖进	721015	下颌骨骨折切开复位内固定术
180	C03眼科口腔	2020-06-20	2020-06-24	2990942	胡波	男	43Y	眶骨骨折	创伤性鼓膜穿孔	治愈	郑海华	韩晓晖	林达	眶骨骨折切开复位术
181	C03眼科口腔	2020-06-20	2020-06-24	2990978	曾焕保	男	58Y	取除骨折内固定装置	脂肪肝	其他	陈龙	陈龙	应晓洲	掌骨内固定物取出术
182	C03眼科口腔	2020-06-20	2020-06-24	2991103	童孝坤	男	47Y	取除骨折内固定装置	特指肾盂积水;输尿管结石	其他	陈龙	陈龙	应晓洲	跖骨内固定物取出术
183	C03眼科口腔	2020-06-20	2020-06-26	2991511	陈垣憬	男	18Y	取除骨折内固定装置		其他	洪建军	周一飞	周一飞	踝关节内固定物取出术
184	C03眼科口腔	2020-06-14	2020-06-27	2991795	徐如里	男	53Y	颧骨骨折	上颌骨骨折	治愈	肖进	肖进	721015	颧骨骨折切开复位内固定术
185	C03眼科口腔	2020-06-17	2020-06-27	2991978	郭力豪	男	21Y	下颌骨骨折		治愈	肖进	肖进	721015	下颌骨骨折切开复位内固定术
186	C03眼科口腔	2020-06-17	2020-06-28	2992047	汪德霖	男	39Y	髌骨骨折	肋骨骨折;胸腔积液;肺炎	治愈	陈龙	陈龙	应晓洲	髌骨骨折切开复位张力带钢丝内固定术
187	C03眼科口腔	2020-06-29	2020-07-01	2993391	朱桂新	女	59Y	眼睑裂伤	泪道阻塞;眶骨骨折	治愈	郑海华	韩晓晖	林达	眼睑裂伤缝合术;泪小管探通术
188	C03眼科口腔	2020-06-22	2020-07-04	2994133	鲁玲	女	23Y	下颌骨骨折		治愈	肖进	肖进	721015	下颌骨骨折切开复位内固定术
189	C03眼科口腔	2020-05-31	2020-07-04	2994267	张慈祥	男	41Y	眼睑裂伤	玻璃体损伤;继发性视网膜脱离;眶骨骨折	治愈	郑海华	冯旺强	林达	玻璃体硅油置入术,用于视网膜再附着;视网膜激光凝固术;眼球裂伤缝合;后入路玻璃体切割术;视网膜脱离复位术
190	C03眼科口腔	2020-06-21	2020-07-07	2995148	陈秋君	女	56Y	颧骨骨折		治愈	肖进	肖进	721015	颧骨骨折切开复位内固定术
191	C03眼科口腔	2020-06-30	2020-07-07	2995181	李绍波	男	65Y	跟骨骨折	下肢动脉粥样硬化;脂肪肝;乙型肝炎小三阳;主动脉瓣疾患	好转	赵友明	赵友明	赵友明
192	C03眼科口腔	2020-06-27	2020-07-08	2995430	杨碎枢	男	55Y	眶骨骨折	双眼白内障;视神经损伤;颧骨骨折;上颌骨骨折	治愈	郑海华	郑海华	林达	眶骨骨折切开复位术;上颌骨骨折切开复位固定术;颧骨骨折切开复位内固定术
193	C03眼科口腔	2020-07-10	2020-07-10	2996184	陈影弟	女	87Y	股骨粗隆间骨折	高血压病	未愈	王振文	水小龙	水小龙
194	C03眼科口腔	2020-06-27	2020-07-11	2996271	张磊	男	23Y	眶骨骨折	高眼压症;睑外翻	治愈	郑海华	韩晓晖	林达	局部皮瓣转位眼睑重建术;眶骨骨折切开复位术
195	C03眼科口腔	2020-06-28	2020-07-11	2996509	徐秀堂	男	50Y	颧骨骨折		治愈	肖进	肖进	721015	颧骨骨折切开复位内固定术
196	C03眼科口腔	2020-06-28	2020-07-11	2996555	董彩莲	女	61Y	眶骨骨折	慢性上颌窦炎;视神经损伤;眼睑挫伤;肱骨上端骨折;面部软组织挫伤	治愈	郑海华	韩晓晖	林达	眶骨骨折切开复位术;肱骨骨折切开复位钢板内固定术
197	C03眼科口腔	2020-07-09	2020-07-13	2997054	简正飞	男	36Y	取除骨折内固定装置		其他	陈华	余贤斌	余贤斌	尺骨内固定物取出术
198	C03眼科口腔	2020-06-25	2020-07-14	2997422	叶志林	男	51Y	眼球破裂	鼻骨骨折;眼内出血;泪小管裂伤;眼睑裂伤;眶骨骨折	好转	蔡剑秋	夏哲人	陈婕灵	前入路玻璃体切除术;眼球裂伤缝合;眼睑裂伤缝合术;内眦成形术;鼻清创术
199	C03眼科口腔	2020-07-10	2020-07-15	2997769	张磊	男	27Y	颧骨骨折	脑挫伤;颅骨骨折;眶骨骨折;颞骨骨折;额骨骨折	未愈	肖进	肖进	721015
200	C03眼科口腔	2020-07-14	2020-07-18	2998634	孙成龙	男	21Y	取除骨折内固定装置		其他	肖进	肖进	721015	下颌骨内固定物取出术
201	C03眼科口腔	2020-07-14	2020-07-18	2998641	王永君	男	32Y	泪小管裂伤	眼睑裂伤;眶骨骨折	治愈	蔡剑秋	夏哲人	陈婕灵	眼睑裂伤缝合术;泪小管吻合术;鼻泪管插管术
202	C03眼科口腔	2020-07-08	2020-07-20	2999629	程雅微	女	6Y	开放性面部损伤	上颌骨骨折	治愈	肖进	肖进	721015	上颌骨骨折切开复位固定术
203	C03眼科口腔	2020-07-18	2020-07-20	2999719	李锦坤	男	7Y	特指手术随诊医疗	取除骨折内固定装置	其他	蔡剑秋	夏哲人	陈婕灵	外眦成形术;股骨内固定物取出术
204	C03眼科口腔	2020-07-18	2020-07-22	3000200	陈丐勇	男	35Y	眼科术后取出硅油	无晶状体;眶骨骨折;上睑下垂	其他	郑海华	杨顺海	林达	玻璃体腔硅油取出术;人工晶体置入术
205	C03眼科口腔	2020-07-16	2020-07-25	3000997	王晨霏	女	5Y	开放性下颌骨骨折	跖骨骨折	好转	肖进		721015
206	C03眼科口腔	2020-07-26	2020-08-01	3003801	魏怀军	男	45Y	下颌骨骨折		未愈	肖进	肖进	721015
207	C03眼科口腔	2020-07-28	2020-08-01	3003814	彭建梅	女	26Y	下颌骨骨折	头部外伤;皮肤裂伤	未愈	肖进	肖进	721015
208	C03眼科口腔	2020-07-17	2020-08-02	3003898	程茂贵	男	37Y	眼球破裂	额骨骨折;眼内出血;颅腔积气;结膜裂伤;脑挫伤	治愈	郑海华	冯旺强	林达	前房冲洗术;眼球裂伤缝合
209	C03眼科口腔	2020-07-20	2020-08-04	3004535	吕国生	男	46Y	下颌骨骨折		治愈	肖进	肖进	721015	下颌骨骨折切开复位内固定术
210	C03眼科口腔	2020-07-27	2020-08-04	3004789	杨赛龙	男	26Y	取除骨折内固定装置		其他	肖进	肖进	721015	下颌骨内固定物取出术
211	C03眼科口腔	2020-07-29	2020-08-05	3004881	潘文丽	女	25Y	眶骨骨折		治愈	郑海华	韩晓晖	林达	眶骨骨折切开复位术
212	C03眼科口腔	2020-07-28	2020-08-05	3005162	钟声洋	男	27Y	开放性上颌骨骨折		治愈	肖进	肖进	721015	上颌骨骨折切开复位固定术
213	C03眼科口腔	2020-07-27	2020-08-08	3005904	潘启书	男	20Y	下颌骨骨折	面部损伤	治愈	肖进	肖进	721015	下颌骨骨折切开复位内固定术
214	C03眼科口腔	2020-07-27	2020-08-12	3007226	陈大良	男	51Y	眼球破裂	视网膜分支静脉阻塞;虹膜损伤;外伤性白内障;眶骨骨折;眼内出血	治愈	郑海华	董志章	林达	眼球裂伤缝合;玻璃体腔药物注射术
215	C03眼科口腔	2020-08-09	2020-08-12	3007330	朱炜	男	11Y	取除骨折内固定装置		其他	黄俊武	黄俊武	胡炜	桡骨内固定物取出术
216	C03眼科口腔	2020-08-10	2020-08-15	3008134	陈怡然	女	3Y	取除骨折内固定装置		其他	肖进	肖进	721015	下颌骨内固定物取出术
217	C03眼科口腔	2020-08-09	2020-08-15	3008359	倪国志	男	67Y	股骨颈骨折		治愈	洪建军	余洋	余洋	人工股骨头置换术
218	C03眼科口腔	2020-08-11	2020-08-16	3008725	肖思旋	女	6Y	取除骨折内固定装置		其他	肖进	肖进	721015	下颌骨内固定物取出术
219	C03眼科口腔	2020-08-02	2020-08-17	3008950	沈海峰	男	21Y	下颌骨骨折		治愈	肖进	肖进	721015	下颌骨骨折切开复位内固定术
220	C03眼科口腔	2020-07-22	2020-08-17	3008973	秦光录	男	53Y	上颌骨骨折	头部外伤;多处挫伤;贫血;脑挫伤;眶骨骨折;创伤性牙齿脱落	治愈	肖进	肖进	721015	牙槽植骨成形术
221	C03眼科口腔	2020-07-27	2020-08-17	3008978	杨连文	男	51Y	下颌骨骨折		好转	肖进	肖进	721015	下颌骨骨折切开复位内固定术
222	C03眼科口腔	2020-08-04	2020-08-17	3008997	江波	男	28Y	下颌骨骨折		好转	肖进	肖进	721015	下颌骨骨折切开复位内固定术
223	C03眼科口腔	2020-07-25	2020-08-18	3009309	叶定想	男	47Y	上颌骨骨折		治愈	肖进	肖进	721015	上颌骨骨折切开复位固定术
224	C03眼科口腔	2020-08-18	2020-08-19	3009667	柯根夫	男	62Y	下颌骨骨折		未愈	肖进	肖进	721015
225	C03眼科口腔	2020-08-05	2020-08-20	3010310	黄为梅	女	43Y	泪小管裂伤	小腿挫伤;眼睑裂伤;桡骨下端骨折	好转	郑穗联	查屹	陈婕灵	眼睑裂伤缝合术;桡骨骨折切开复位钢板内固定术;面部清创缝合术;泪小管吻合术;泪小管探通术
226	C03眼科口腔	2020-08-11	2020-08-22	3010678	滕有福	男	74Y	眼挫伤	继发于眼外伤的青光眼;单眼白内障;尺桡关节脱位;结膜裂伤;眶骨骨折;晶状体脱位;虹膜离断;黄斑裂孔;眼内出血;高血压病	治愈	郑海华	董志章	林达	前入路玻璃体切除术
227	C03眼科口腔	2020-06-21	2020-08-22	3010868	陶锋	男	45Y	股骨粗隆间骨折	眶骨骨折	治愈	郑海华	韩晓晖	林达	眶骨骨折切开复位术;股骨骨折切开复位髓内针内固定术
228	C03眼科口腔	2020-08-22	2020-08-25	3011614	董怀存	男	61Y	取除骨折内固定装置	翼状胬肉	其他	郑海华	韩晓晖	林达	面骨内固定物取出术
229	C03眼科口腔	2020-08-23	2020-08-26	3012293	刘梅	女	44Y	取除骨折内固定装置		其他	肖进	肖进	721015	下颌骨内固定物取出术
230	C03眼科口腔	2020-08-23	2020-08-29	3012839	董昕琦	女	8Y	取除骨折内固定装置		其他				下颌骨内固定物取出术
231	C03眼科口腔	2020-08-06	2020-08-29	3012886	谷智博	男	5Y	开放性面部损伤	下颌骨骨折	治愈	肖进	肖进	721015	面神经吻合术;下颌骨骨折切开复位内固定术
232	C03眼科口腔	2020-08-24	2020-08-31	3013670	杨为民	男	29Y	颧骨骨折	多处挫伤;上颌骨骨折;额部血肿	未愈	肖进	肖进	721015
233	C03眼科口腔	2020-06-17	2020-08-31	3013909	王政杰	男	40Y	眶骨骨折	颧骨骨折;上颌骨骨折;面神经损伤;眼球挫伤	治愈	郑海华	韩晓晖	林达	眶骨骨折切开复位术;上颌骨骨折切开复位固定术;颧骨骨折切开复位术
234	C03眼科口腔	2020-08-27	2020-09-01	3014120	梁选跃	男	41Y	眼睑裂伤	前房积血;角膜损伤;外伤性白内障;眶骨骨折	好转	蔡剑秋	查屹	陈婕灵
235	C03眼科口腔	2020-08-29	2020-09-01	3014267	陈峰	男	34Y	视神经损伤	鼻骨骨折;高度近视;前房积血;眶骨骨折	好转	蔡剑秋	夏哲人	陈婕灵
236	C03眼科口腔	2020-08-03	2020-09-02	3014378	陈显腾	男	45Y	上颌骨骨折		治愈	肖进	肖进	721015	上颌骨骨折切开复位固定术
237	C03眼科口腔	2020-08-29	2020-09-05	3015358	陈涛	男	28Y	取除骨折内固定装置		其他	郑海华	韩晓晖	林达	面骨内固定物取出术
238	C03眼科口腔	2020-08-26	2020-09-09	3016855	王琴	女	44Y	下颌骨骨折	颧骨骨折	治愈	肖进	肖进	721015	颧骨骨折切开复位内固定术;下颌骨骨折切开复位内固定术
239	C03眼科口腔	2020-09-05	2020-09-12	3017531	游芠瑄	女	1Y	牙槽骨骨折		治愈	肖进	肖进	721015	牙槽骨折切开复位内固定术
240	C03眼科口腔	2020-09-12	2020-09-13	3017880	陈峰	男	34Y	眶骨骨折	视神经损伤	未愈	郑海华	韩晓晖	林达
241	C03眼科口腔	2020-09-14	2020-09-17	3019101	邵仕友	男	47Y	泪小管裂伤	眼睑裂伤;眶骨骨折	治愈	蔡剑秋	夏哲人	陈婕灵	泪小管吻合术;鼻泪管插管术;眼睑缝合术
242	C03眼科口腔	2020-09-11	2020-09-17	3019135	余承银	男	64Y	锁骨骨折	肝囊肿;脂肪肝	治愈	陈龙	陈龙	应晓洲	锁骨骨折切开复位钢板内固定术
243	C03眼科口腔	2020-08-15	2020-09-21	3020268	邓福义	男	31Y	眼球破裂	眼内出血;眶骨骨折	治愈	郑海华	杨顺海	林达	眼球裂伤缝合;上颌骨骨折切开复位术;颧骨骨折切开复位术;眶骨骨折切开复位术;眼睑裂伤缝合术
244	C03眼科口腔	2020-09-09	2020-09-21	3020375	杨顺权	男	40Y	取除骨折内固定装置		其他	肖进	肖进	721015	下颌骨内固定物取出术
245	C03眼科口腔	2020-09-19	2020-09-23	3020991	梁皓川	男	2Y	眼睑裂伤	眶骨骨折;面部裂伤;面部软组织挫伤	治愈	郑海华	查屹	林达	皮肤和皮下组织异物切开取出术;眼睑板层裂伤修补术;面部清创缝合术
246	C03眼科口腔	2020-09-19	2020-09-24	3021398	王正	男	40Y	取除骨折内固定装置	人工眼安装和调整	其他	郑海华	韩晓晖	林达	面骨内固定物取出术
247	C03眼科口腔	2020-09-19	2020-09-26	3022125	汤中成	男	49Y	眶骨骨折	上睑下垂	治愈	郑海华	韩晓晖	林达	眶骨骨折切开复位术
248	C03眼科口腔	2020-09-25	2020-09-26	3022193	李香娇	女	53Y	闭合性胫骨平台骨折	腓骨骨折	好转	翁益民	翁益民	柯陈荣
249	C03眼科口腔	2020-09-19	2020-09-26	3022211	吴火明	男	25Y	眶骨骨折		治愈	郑海华	韩晓晖	林达	眶骨骨折切开复位术
250	C03眼科口腔	2020-09-13	2020-09-27	3022246	游继国	男	41Y	下颌骨骨折		治愈	肖进	肖进	721015	下颌骨骨折切开复位内固定术
251	C03眼科口腔	2020-09-09	2020-09-29	3023019	姜佳辉	男	20Y	下颌骨骨折	鼻骨骨折;颞骨骨折;眶骨骨折;上颌骨骨折	治愈	肖进	肖进	721015	上颌骨骨折切开复位固定术;下颌骨骨折切开复位内固定术
252	C03眼科口腔	2020-09-26	2020-10-02	3024132	林金宽	男	64Y	颧骨骨折		治愈	肖进		721015	颧骨骨折切开复位内固定术
253	C03眼科口腔	2020-09-27	2020-10-02	3024147	邢继友	男	20Y	下颌骨骨折		治愈	肖进		721015	下颌骨骨折切开复位内固定术
254	C03眼科口腔	2020-09-23	2020-10-02	3024149	高瑞瑞	女	31Y	下颌骨骨折		治愈	肖进		721015	下颌骨骨折切开复位内固定术
255	C03眼科口腔	2020-09-17	2020-10-06	3025112	易文汉	男	35Y	下颌骨骨折	颧骨骨折;上颌骨骨折	治愈	肖进		721015	颧骨骨折切开复位内固定术;下颌骨骨折切开复位内固定术
256	C03眼科口腔	2020-10-02	2020-10-10	3026069	谷佳凌	男	35Y	眼球破裂	眶骨骨折;眼睑裂伤;面部裂伤;皮肤和皮下组织局部感染	治愈	郑海华	董志章	林达	面部清创缝合术;眼睑裂伤缝合术;眼球裂伤缝合
257	C03眼科口腔	2020-10-05	2020-10-11	3026381	张卫琴	女	46Y	眼球破裂	眼睑裂伤;眶骨骨折;玻璃体出血	好转	郑海华	林达	林达	眼球裂伤缝合;眼睑裂伤缝合术
258	C03眼科口腔	2020-09-26	2020-10-11	3026522	刘奎伟	男	36Y	下颌骨骨折		治愈	肖进		721015	下颌骨骨折切开复位内固定术
259	C03眼科口腔	2020-10-10	2020-10-17	3028248	刘帅民	男	26Y	取除骨折内固定装置		其他	郑海华	韩晓晖	林达	面骨内固定物取出术
260	C03眼科口腔	2020-10-02	2020-10-17	3028437	蔡方良	男	16Y	下颌骨骨折		治愈	肖进		721015	下颌骨骨折切开复位内固定术
261	C03眼科口腔	2020-10-13	2020-10-18	3029036	林正来	男	34Y	玻璃体出血	胸腔积液;多处挫伤;2型糖尿病性视网膜病变;高血压病;头部外伤;胸部损伤;肋骨骨折	治愈	蔡剑秋	郑穗联	陈婕灵
262	C03眼科口腔	2020-10-15	2020-10-20	3029495	彭诗颖	女	4Y	取除骨折内固定装置		其他				下颌骨内固定物取出术
263	C03眼科口腔	2020-10-17	2020-10-20	3029642	杜世华	男	38Y	取除骨折内固定装置		其他	郑海华	韩晓晖	林达	面骨内固定物取出术
264	C03眼科口腔	2020-10-13	2020-10-25	3031145	童水缸	男	52Y	下颌骨骨折		治愈				下颌骨骨折切开复位内固定术
265	C03眼科口腔	2020-10-09	2020-10-25	3031447	王士宇	男	54Y	眶骨骨折	脑挫伤;额骨骨折;上颌骨骨折;视神经损伤;面部软组织挫伤;视网膜裂孔;头部外伤	治愈	郑海华	韩晓晖	林达	眶骨骨折切开复位术
266	C03眼科口腔	2020-10-04	2020-10-28	3032416	郑建豪	男	21Y	多发性面骨骨折	继发性视网膜病变;颅骨骨折;颅腔积气;脑脊液鼻漏;眶骨骨折;颈椎半脱位;颧骨骨折	治愈	肖进		721015	颧骨骨折切开复位内固定术;眶骨骨折切开复位术;上颌骨骨折切开复位固定术;一个眶壁减压术;脑脊液鼻瘘修补术;视神经减压术
267	C03眼科口腔	2020-10-21	2020-10-28	3032428	訾大葱	女	42Y	取除骨折内固定装置		其他	肖进	肖进	721015	面骨内固定物取出术
268	C03眼科口腔	2020-10-23	2020-10-31	3033353	章圣标	男	39Y	双踝骨折		治愈	潘骏	冯永增	冯永增	腓骨骨折切开复位钢板内固定术;踝关节骨折切开复位螺钉内固定术
269	C03眼科口腔	2020-10-23	2020-11-03	3034358	翁结义	男	48Y	取除骨折内固定装置	盲，单眼;无晶状体;眼球萎缩	其他	郑海华	韩晓辉	林达	眼球摘除伴义眼植入术;面骨内固定物取出术
270	C03眼科口腔	2020-11-02	2020-11-04	3034722	陈仁福	男	49Y	泪小管裂伤	眼睑裂伤;髌骨骨折	治愈	郑海华	韩晓辉	林达	泪小管吻合术;鼻泪管插管术;眼睑裂伤缝合术
271	C03眼科口腔	2020-10-20	2020-11-04	3034920	林和敏	男	19Y	上颌骨骨折	眶骨骨折	治愈	肖进	肖进	721015	上颌骨骨折切开复位固定术;眶骨骨折切开复位术
272	C03眼科口腔	2020-10-29	2020-11-07	3035578	唐安琪	女	3Y	取除骨折内固定装置		其他	肖进	肖进	721015	面骨内固定物取出术
273	C03眼科口腔	2020-11-01	2020-11-07	3035599	张涛	男	19Y	下颌骨骨折		治愈	肖进	肖进	721015	下颌骨骨折切开复位内固定术
274	C03眼科口腔	2020-10-29	2020-11-07	3035667	徐后幸	男	37Y	颧骨骨折	脑震荡	好转	肖进	陈大庆	721015
275	C03眼科口腔	2020-10-28	2020-11-07	3035725	戴吉林	男	54Y	取除骨折内固定装置		其他	肖进	肖进	721015	面骨内固定物取出术
276	C03眼科口腔	2020-10-21	2020-11-07	3035868	陆丰林	男	41Y	眶骨骨折	眼睑裂伤	治愈	郑海华	韩晓辉	林达	眶骨骨折切开复位术
277	C03眼科口腔	2020-11-04	2020-11-09	3036326	朱龙薇	女	4Y	取除骨折内固定装置		其他	肖进	肖进	721015	下颌骨内固定物取出术
278	C03眼科口腔	2020-11-04	2020-11-11	3037226	彭家民	男	48Y	取除骨折内固定装置		其他	肖进	肖进	721015	颌骨外固定去除
279	C03眼科口腔	2020-10-28	2020-11-14	3037808	王松银	男	37Y	眶骨骨折	眼球挫伤;颧骨骨折;上颌骨骨折	治愈	郑海华	韩晓辉	林达	眶骨骨折切开复位术;颧骨骨折切开复位术;上颌骨骨折切开复位固定术
280	C03眼科口腔	2020-11-04	2020-11-14	3037933	余桂林	女	61Y	取除骨折内固定装置		其他	肖进	肖进	721015	颌骨外固定去除
281	C03眼科口腔	2020-10-25	2020-11-15	3038390	胡金建	男	41Y	颧骨骨折		治愈	肖进	肖进	721004	颧骨骨折切开复位内固定术
282	C03眼科口腔	2020-11-04	2020-11-15	3038531	陈笑琴	女	58Y	颧骨骨折		治愈	肖进	肖进	721004	颧骨骨折切开复位内固定术
283	C03眼科口腔	2020-11-14	2020-11-17	3039140	黄彩平	女	58Y	取除骨折内固定装置		其他	赵友明	赵友明	赵友明	锁骨内固定物取出术
284	C03眼科口腔	2020-11-04	2020-11-17	3039311	吕国生	男	46Y	取除骨折内固定装置		其他	肖进	肖进	721004	颌骨外固定去除
285	C03眼科口腔	2020-11-16	2020-11-19	3039913	陈爱华	女	33Y	下颌骨骨折		好转	肖进	肖进	721015
286	C03眼科口腔	2020-11-03	2020-11-22	3040900	陈树辉	男	49Y	下颌骨骨折	颞下颌关节脱位	治愈	肖进	肖进	721015	下颌骨骨折切开复位内固定术;颞下颌关节脱位切开复位术
287	C03眼科口腔	2020-11-18	2020-11-23	3041084	林振漪	男	51Y	下颌骨骨折		好转	肖进	肖进	721015
288	C03眼科口腔	2020-11-19	2020-11-25	3041786	陈方肖	男	58Y	取除骨折内固定装置		其他	肖进	肖进	721015	下颌骨内固定物取出术
289	C03眼科口腔	2020-11-19	2020-11-25	3041893	陈晓峰	男	45Y	取除骨折内固定装置		其他	肖进	肖进	721015	面骨内固定物取出术
290	C03眼科口腔	2020-11-23	2020-11-26	3042216	金光锋	男	43Y	骨折治疗后随诊检查	腰椎间盘突出	其他	余可和	余可和	项光恒
291	C03眼科口腔	2020-11-16	2020-11-26	3042280	曹元江	男	46Y	肱骨外科颈骨折	腰椎间盘突出;腰椎滑脱;开放性多发性损伤;后天性肾囊肿;头部外伤;颧骨骨折;颅底骨折;腰椎峡部裂;脂肪肝	治愈	陈龙	陈龙	应晓洲	肱骨骨折切开复位钢针内固定术
292	C03眼科口腔	2020-11-23	2020-11-28	3042775	孙友松	男	34Y	取除骨折内固定装置		其他	洪建军	余洋	余洋	股骨内固定物取出术
293	C03眼科口腔	2020-11-23	2020-11-28	3042989	卢晓燕	女	38Y	取除骨折内固定装置		其他	翁益民	翁益民	柯陈荣	掌骨内固定物取出术
294	C03眼科口腔	2020-11-24	2020-11-28	3043072	潘正安	男	41Y	眶骨骨折		治愈	郑海华	冯旺强	林达	眶骨骨折切开复位术
295	C03眼科口腔	2020-11-27	2020-11-30	3043463	黎舟	男	15Y	取除骨折内固定装置		其他	潘骏	冯永增	冯永增	尺骨内固定物取出术
296	C03眼科口腔	2020-11-22	2020-11-30	3043465	胡朝斌	男	26Y	下颌骨骨折		治愈	肖进	肖进	721015	下颌骨骨折切开复位内固定术
297	C03眼科口腔	2020-11-28	2020-11-30	3043478	安守育	男	47Y	取除骨折内固定装置		其他	郑海华	韩晓辉	林达	眶植入物去除术
298	C03眼科口腔	2020-11-20	2020-11-30	3043602	陈明	男	44Y	胸椎骨折	胸椎椎管狭窄;特指肾盂积水;韧带钙化;肾萎缩	治愈	陈龙	陈龙	应晓洲	胸骨骨折切开复位螺钉内固定术
299	C03眼科口腔	2020-11-23	2020-11-30	3043610	周佰源	男	58Y	取除骨折内固定装置	高血压病;糖尿病	其他	洪建军	余洋	余洋	胫骨内固定物取出术
300	C03眼科口腔	2020-11-18	2020-12-02	3044166	林玲友	男	40Y	眼球破裂	眼睑裂伤;眶骨骨折;外眼部位异物;视物模糊	治愈	郑海华	苟苏庆	林达	眼睑裂伤缝合术;眼球裂伤缝合;泪小管探通术
301	C03眼科口腔	2020-11-22	2020-12-02	3044514	刘剑锋	男	43Y	下颌骨骨折		治愈	肖进	肖进	721004	下颌骨骨折切开复位内固定术
302	C03眼科口腔	2020-11-24	2020-12-03	3044661	冯云福	男	26Y	上颌骨骨折	眶骨骨折	治愈	肖进	肖进	721015	眶骨骨折切开复位术;上颌骨骨折切开复位固定术
303	C03眼科口腔	2020-11-19	2020-12-03	3044667	周小余	男	34Y	眶骨骨折	头部外伤;脑震荡;皮下血肿;眼睑水肿;多处浅表损伤;眼挫伤	治愈	郑海华	韩晓辉	林达	眶骨骨折切开复位术
304	C03眼科口腔	2020-11-27	2020-12-05	3045131	王定福	男	67Y	三头肌肌肉和肌腱损伤	髌骨骨折;开放性膝部损伤;特指手术后状态	治愈	潘骏	冯永增	金海东	皮肤和皮下组织非切除性清创;韧带修补术
305	C03眼科口腔	2020-11-30	2020-12-06	3045789	虞洪满	男	51Y	取除骨折内固定装置		其他	王振文	水小龙	水小龙	髌骨内固定物取出术
306	C03眼科口腔	2020-12-01	2020-12-06	3045791	南爱琴	女	51Y	泪小管断裂	眶骨骨折;鼻骨骨折;头皮挫伤;肋骨骨折;肺挫伤;子宫平滑肌瘤;眼睑裂伤;眼挫伤	治愈	郑海华	杨顺海	林达	眼睑缝合术;鼻泪管插管术;泪小管吻合术
307	C03眼科口腔	2020-11-22	2020-12-07	3046067	凃方明	男	58Y	眶骨骨折	眼球挫伤;脑震荡;头部外伤;多发性损伤;肩锁关节脱位;面部软组织挫伤;眼损伤;双眼白内障;肩关节扭伤和劳损	治愈	郑海华	韩晓辉	林达	肩关节脱位切开复位内固定术;眶骨骨折闭合复位术
308	C03眼科口腔	2020-10-13	2020-12-09	3046553	郑军善	男	37Y	创伤性脾破裂	血气胸;桡骨骨折;多发性损伤;视神经损伤;失血性休克;腹腔内出血;头部外伤;眶骨骨折;肋骨骨折;耻骨骨折	治愈	郑海华	董志章	黄义星	脾切除术;尺骨骨折切开复位钢针内固定术
309	C03眼科口腔	2020-11-29	2020-12-09	3046709	Manal	女	20Y	下颌骨骨折		治愈	肖进	肖进	721015	下颌骨骨折切开复位内固定术
310	C03眼科口腔	2020-11-30	2020-12-09	3046756	王小娟	女	65Y	眶骨骨折		治愈	郑海华	韩晓辉	林达	眶骨骨折切开复位术
311	C03眼科口腔	2020-11-22	2020-12-12	3047486	高娜	女	21Y	下颌骨骨折		治愈	肖进	肖进	721015	下颌骨骨折切开复位内固定术
312	C03眼科口腔	2020-12-07	2020-12-12	3047563	武加华	男	42Y	取除骨折内固定装置		其他	郑海华	韩晓辉	林达	眶植入物去除术
313	C03眼科口腔	2020-11-29	2020-12-15	3048519	何琴福	女	20Y	下颌骨骨折		治愈	肖进	肖进	721015	下颌骨骨折切开复位内固定术
314	C03眼科口腔	2020-11-28	2020-12-16	3049014	吴天荣	男	46Y	颧骨骨折		治愈	肖进	肖进	721015	颧骨骨折切开复位内固定术
315	C03眼科口腔	2020-12-12	2020-12-19	3049837	骆名强	男	51Y	取除骨折内固定装置	上颌骨骨折;颧骨骨折;安装义眼;特指手术后状态	其他	郑海华	韩晓辉	林达	面骨内固定物取出术
316	C03眼科口腔	2020-12-13	2020-12-19	3049864	李成江	男	31Y	上颌骨骨折	颧骨骨折;面部挫伤	治愈	肖进	肖进	721015	面部清创缝合术
317	C03眼科口腔	2020-10-30	2020-12-19	3050011	杨天成	男	48Y	虹膜离断	眼损伤;继发于眼部疾患青光眼;孔源性视网膜脱离;玻璃体出血;眶骨骨折;晶状体脱位	治愈	郑海华	董志章	林达	玻璃体腔硅油取出术;前入路玻璃体切除术;玻璃体硅油置入术,用于视网膜再附着;视网膜激光凝固术;视网膜脱离复位术;玻璃体腔脱位晶状体取出术
318	C03眼科口腔	2020-11-07	2020-12-20	3050153	贾万里	男	16Y	眶骨骨折	颈椎骨折;鼻骨骨折;视神经损伤;上颌骨骨折;颧骨骨折;肺挫伤;气胸;肩胛骨骨折	好转	郑海华	韩晓辉	林达	面部清创缝合术;髋骨骨折切开复位钢针内固定术;眶外壁重建术;颧骨骨折切开复位内固定术;颌骨修整术
319	C03眼科口腔	2020-12-19	2020-12-23	3051362	南爱琴	女	50Y	眶骨骨折	泪小管裂伤;特指手术后状态	治愈	郑海华	韩晓辉	林达	髋骨骨折切开复位螺钉内固定术
320	C03眼科口腔	2020-12-12	2020-12-23	3051539	王斌晶	男	46Y	眼睑裂伤	眼睑和眼周区开放性伤口;泪小管断裂;鼻骨骨折	治愈	郑海华	冯旺强	林达	内眦成形术;眼睑裂伤缝合术
321	C03眼科口腔	2020-12-16	2020-12-26	3052261	王进孟	男	34Y	下颌骨骨折		治愈	肖进	肖进	721015	下颌骨骨折切开复位内固定术
322	C03眼科口腔	2020-12-12	2020-12-26	3052457	潘继环	男	54Y	上颌骨骨折	颧骨骨折;眶骨骨折	治愈	肖进	肖进	721015	上颌骨骨折切开复位固定术
323	C03眼科口腔	2020-12-21	2020-12-28	3052879	黄孝秀	男	54Y	眶骨骨折	上颌骨骨折;视神经损伤;颅底骨折	治愈	郑海华	韩晓辉	林达	眶骨骨折切开复位术
324	C03眼科口腔	2020-12-17	2020-12-28	3053161	刘定南	男	39Y	眼球穿通伤	眼损伤;眶骨骨折;眼睑裂伤	治愈	郑海华	冯旺强	林达	眼球摘除伴义眼台置入术;眼球内容物剜出术
325	C03眼科口腔	2020-12-22	2020-12-29	3053259	李明强	男	28Y	下颌骨骨折		治愈	肖进	肖进	721015
326	C03眼科口腔	2020-12-14	2020-12-30	3053865	陈中绪	男	25Y	眶骨骨折	颧骨骨折;上颌骨骨折	治愈	肖进	肖进	721015	眶骨骨折切开复位术
327	C03眼科口腔	2020-12-26	2020-12-30	3053919	裴怀娥	女	42Y	眶骨骨折		治愈	郑海华	韩晓辉	林达	眶骨骨折切开复位术
328	C04综合病房	2020-01-19	2020-01-23	2943657	鲍庆明	男	58Y	取除骨折内固定装置		其他	王振文	水小龙	水小龙	尺骨内固定物取出术
329	C04综合病房	2020-01-19	2020-01-23	2943658	章朝雷	男	27Y	取除骨折内固定装置	慢性乙型病毒性肝炎	其他	王振文	水小龙	水小龙	尺骨内固定物取出术
330	C04综合病房	2020-01-19	2020-01-23	2943730	谢富贵	女	42Y	取除骨折内固定装置		其他	黄俊武	黄俊武	李振兴	肩锁关节内固定物取出术
331	C04综合病房	2020-01-18	2020-01-25	2944070	张烁烁	女	33Y	取除骨折内固定装置		其他	陈华	陈华	余贤斌	跟骨内固定物取出术
332	C04综合病房	2020-01-19	2020-01-25	2944092	傅林琴	女	33Y	取除骨折内固定装置		其他	洪建军	洪建军	胡炜	尺骨内固定物取出术
333	C04综合病房	2020-01-21	2020-01-29	2945728	王玉花	女	69Y	闭合性胫骨平台骨折	双踝骨折;脂肪肝	治愈	洪建军	洪建军	胡炜	踝关节骨折切开复位钢板内固定术;胫骨骨折切开复位钢板内固定术
334	C04综合病房	2020-01-21	2020-01-29	2945864	林宣富	男	57Y	前列腺恶性肿瘤	陈旧性肋骨骨折;骨继发恶性肿瘤;甲状腺恶性肿瘤个人史;高血压病	好转	何有华	木海琦	木海琦
335	C04综合病房	2020-01-27	2020-02-01	2946663	王根夫	男	41Y	取除骨折内固定装置		其他	赵友明	赵友明	郭伟军	股骨内固定物取出术
336	C04综合病房	2020-01-26	2020-02-01	2946897	金林	女	41Y	取除骨折内固定装置	单纯性肾囊肿	其他	余可和	余可和	余可和	尺骨内固定物取出术;桡骨内固定物取出术
337	C04综合病房	2020-02-14	2020-02-16	2950545	陈忠武	男	41Y	指骨骨折		治愈	陈龙	陈龙	金海东	指骨骨折切开复位钢针内固定术
338	C04综合病房	2020-02-19	2020-02-20	2951825	叶罗青	女	22Y	取除骨折内固定装置		其他	陈龙	陈龙	金海东	踝关节内固定物取出术
339	C04综合病房	2020-03-03	2020-03-04	2955723	陈有福	男	37Y	取除骨折内固定装置		其他	陈龙	陈龙	陈龙	指骨内固定物取出术
340	C04综合病房	2020-03-07	2020-03-11	2958235	曾素梅	女	76Y	取除骨折内固定装置		其他	孔建中	孔建中	柯陈荣	股骨内固定物取出术
341	C04综合病房	2020-03-14	2020-03-19	2960567	曾垂龙	男	34Y	取除骨折内固定装置	前列腺结石;脂肪肝	其他	赵友明	赵友明	郭伟军	踝关节内固定物取出术
342	C04综合病房	2020-04-06	2020-04-08	2966553	吴海林	男	37Y	取除骨折内固定装置	高血压病	其他	陈龙	陈龙	陈龙	腓骨内固定物取出术;踝关节内固定物取出术
343	C04综合病房	2020-03-15	2020-04-19	2970112	余小华	女	63Y	臂骨折后遗症	高脂血症;膝关节病;肾结石;多发性肋骨骨折;臂丛神经损伤;腓骨骨折;脂肪肝;高血压病	好转	刘宝华	刘宝华	覃燕青
344	C04综合病房	2020-03-16	2020-04-23	2971304	郑爱鹤	女	75Y	脑梗死	股骨骨折;高脂血症;脑出血后遗症;下肢动脉粥样硬化;颈动脉硬化;肺结节病;2型糖尿病性肾病;吞咽困难;言语障碍;高血压病;肥厚型梗阻性心肌病;左前分支传导阻滞;完全性右束支传导阻滞;心律失常;甲状腺结节;睡眠障碍;骨质疏松;肺部感染	好转	刘宝华	刘宝华	覃燕青
345	C04综合病房	2020-05-07	2020-05-07	2975736	张在文	男	43Y	取除骨折内固定装置		其他	陈龙	陈龙	陈龙	踝关节内固定物取出术
346	C04综合病房	2020-04-21	2020-05-20	2979803	叶长真	男	67Y	创伤性硬膜下出血	锁骨下动脉粥样硬化;感音神经性耳聋;创伤性肾血肿;创伤性胸腔积液;多发性肋骨骨折;肺挫伤;创伤性血胸;脑挫伤;颧骨骨折;前列腺结石;前列腺增生;肝囊肿;脂肪肝	好转	刘宝华	刘宝华	覃燕青
347	C04综合病房	2020-05-13	2020-06-13	2987446	郑爱鹤	女	75Y	肥厚型梗阻性心肌病	骨质疏松;肺部感染;心力衰竭;室上性心动过速;高脂血症;甲状腺结节;睡眠障碍;股骨骨折;肺结节病;2型糖尿病性肾病;吞咽困难;言语障碍;高血压病;左前分支传导阻滞;完全性右束支传导阻滞;心律失常;胆囊结石;脑出血后遗症;脑梗死后遗症	好转	刘宝华	刘宝华	覃燕青
348	C04综合病房	2020-06-01	2020-06-22	2990282	何学军	男	28Y	脑出血后遗症	双眼视力特指疾患;陈旧性面骨骨折;高脂血症;言语障碍;脂肪肝	好转	刘宝华	刘宝华	覃燕青
349	C04综合病房	2020-05-18	2020-06-22	2990421	高奇堪	男	66Y	脑挫伤	低钾血症;颅骨骨折;胸椎骨折;肋骨骨折;锁骨骨折;肺挫伤;头皮挫伤;动眼神经损伤;面神经损伤;外伤后脑积水;创伤性胸腔积液;高血压病;弥漫性轴索损伤	好转	刘宝华	刘宝华	覃燕青
350	C04综合病房	2020-06-21	2020-06-23	2990737	李中怀	男	62Y	胸椎骨折	高血压病	好转	余可和	余可和	柯陈荣
351	C04综合病房	2020-07-04	2020-07-07	2995253	陈彩芽	女	51Y	取除骨折内固定装置	脂肪肝	其他	余可和	余可和	柯陈荣	踝关节内固定物取出术
352	C04综合病房	2020-06-24	2020-07-15	2997882	陈伯豪	男	83Y	脑梗死	下肢动脉粥样硬化;胆囊结石;高血压病;单纯性肾囊肿;肺部感染;2型糖尿病;股骨粗隆间骨折;肺部阴影;肝囊肿;肾结石	好转	刘宝华	刘宝华	覃燕青
353	C04综合病房	2020-07-14	2020-07-16	2998305	刘静	女	46Y	取除骨折内固定装置		其他	陈华	陈华	余贤斌	踝关节内固定物取出术
354	C04综合病房	2020-07-11	2020-07-18	2998657	李成吉	男	13Y	拇趾骨折		治愈	赵友明	赵友明	赵友明	趾骨骨折切开复位钢针内固定术
355	C04综合病房	2020-07-18	2020-07-20	2999573	徐圳	男	15Y	取除骨折内固定装置		其他	陈龙	陈龙	应晓洲	盆骨内固定物取出术
356	C04综合病房	2020-07-18	2020-07-21	2999953	周林香	女	59Y	取除骨折内固定装置		其他	陈龙	陈龙	陈龙	胫骨内固定物取出术
357	C04综合病房	2020-06-22	2020-07-22	3000347	徐迅	男	44Y	外伤后脑积水	脑出血后遗症;高血压病;运动障碍;2型糖尿病;肋骨骨折;高脂血症;混合性失语;肝功能不全;精神障碍;低钾血症;颅骨骨折	治愈	刘宝华	刘宝华	覃燕青
358	C04综合病房	2020-07-18	2020-07-22	3000395	张升良	男	52Y	取除骨折内固定装置	脂肪肝	其他	陈龙	陈龙	陈龙	跟骨内固定物取出术
359	C04综合病房	2020-07-25	2020-07-28	3002446	李熙地	男	56Y	取除骨折内固定装置		其他	杨雷	陈龙	陈龙	跖骨内固定物取出术
360	C04综合病房	2020-07-29	2020-08-01	3003647	汤六微	女	34Y	取除骨折内固定装置		其他	杨雷	陈龙	陈龙	锁骨内固定物取出术
361	C04综合病房	2020-08-01	2020-08-03	3004278	潘正	男	13Y	取除骨折内固定装置		其他	杨雷	陈龙	陈龙	尺骨内固定物取出术
362	C04综合病房	2020-08-01	2020-08-03	3004423	金万泉	男	18Y	取除骨折内固定装置		其他	杨雷	陈龙	陈龙	腓骨内固定物取出术;胫骨内固定物取出术
363	C04综合病房	2020-08-01	2020-08-05	3004936	金海云	女	44Y	取除骨折内固定装置		其他	杨雷	陈龙	陈龙	踝关节内固定物取出术
364	C04综合病房	2020-08-01	2020-08-05	3004965	蔡福轮	男	52Y	取除骨折内固定装置		其他	杨雷	陈龙	陈龙	肩锁关节内固定物取出术
365	C04综合病房	2020-07-27	2020-08-05	3005026	廖情缘	男	17Y	下颌骨骨折	上颌骨骨折;急性上颌窦炎;鼻骨骨折	好转				下颌骨骨折切开复位内固定术
366	C04综合病房	2020-08-08	2020-08-11	3007020	张家美	男	46Y	取除骨折内固定装置	胆囊结石	其他	陈龙	陈龙	陈龙	踝关节内固定物取出术
367	C04综合病房	2020-08-02	2020-08-11	3007039	林永安	男	42Y	肾积水伴肾结石	腰椎间盘突出;陈旧性腰椎骨折	治愈	何有华	余凯远	木海琦	经皮肾镜取石术
368	C04综合病房	2020-08-08	2020-08-12	3007392	林成	男	42Y	取除骨折内固定装置	肾结石	其他	陈龙	陈龙	陈龙	髌骨内固定物取出术
369	C04综合病房	2020-08-16	2020-08-17	3009000	尤大巧	男	62Y	取除骨折内固定装置		其他	陈龙	陈龙	应晓洲	踝关节内固定物取出术
370	C04综合病房	2020-08-15	2020-08-19	3009850	沈小东	男	45Y	取除骨折内固定装置	脂肪肝	其他	陈龙	陈龙	应晓洲	踝关节内固定物取出术;跗骨内固定物取出术
371	C04综合病房	2020-07-22	2020-08-22	3010524	徐迅	男	42Y	轻度认知障碍	脑损害和功能障碍及躯体疾病引起特指精神障碍;轻度认知障碍;高血压病;2型糖尿病;肋骨骨折;颅骨骨折;高尿酸血症;混合性失语;脑积水;脑出血后遗症	治愈	刘宝华	刘宝华	覃燕青
372	C04综合病房	2020-08-23	2020-08-24	3011468	林钰洁	女	9Y	取除骨折内固定装置		其他	陈龙	陈龙	应晓洲	桡骨内固定物取出术
373	C04综合病房	2020-08-22	2020-08-26	3011975	陈新	男	9Y	取除骨折内固定装置		其他	陈龙	陈龙	应晓洲	尺骨内固定物取出术;桡骨内固定物取出术
374	C04综合病房	2020-08-22	2020-08-26	3012128	李红弟	女	44Y	取除骨折内固定装置	脂肪肝	其他	陈龙	陈龙	应晓洲	踝关节内固定物取出术
375	C04综合病房	2020-08-22	2020-08-26	3012135	张李秀	女	52Y	取除骨折内固定装置		其他	陈龙	陈龙	应晓洲	髌骨内固定物取出术
376	C04综合病房	2020-08-22	2020-08-29	3012786	詹加旺	男	61Y	取除骨折内固定装置		其他	陈龙	陈龙	陈龙	肱骨内固定物取出术
377	C04综合病房	2020-08-24	2020-08-29	3013277	叶罗青	女	23Y	取除骨折内固定装置		其他	陈龙	陈龙	陈龙	踝关节内固定物取出术
378	C04综合病房	2020-08-29	2020-09-02	3014477	王晴媛	女	61Y	取除骨折内固定装置		其他	陈龙	陈龙	应晓洲	踝关节内固定物取出术
379	C04综合病房	2020-08-29	2020-09-02	3014567	徐松国	男	54Y	取除骨折内固定装置	高血压病;2型糖尿病;脂肪肝	其他	陈龙	陈龙	应晓洲	踝关节内固定物取出术
380	C04综合病房	2020-08-29	2020-09-02	3014580	潘国雄	男	48Y	取除骨折内固定装置		其他	陈龙	陈龙	应晓洲	股骨内固定物取出术
381	C04综合病房	2020-08-10	2020-09-13	3018039	戴洁天	男	93Y	多发性脑梗死	高脂血症;甲状腺结节;喉恶性肿瘤;下咽恶性肿瘤;低钾血症;心功能不全;体位性低血压;前列腺增生;前列腺结石;肋骨骨折;肺挫伤;原发性甲状腺功能减退症;肾结石;吞咽困难;高血压病;变异型心绞痛;下肢动脉粥样硬化;冠状动脉粥样硬化性心脏病	好转	刘宝华	刘宝华	刘宝华
382	C04综合病房	2020-09-13	2020-09-14	3018628	胡陈云	女	52Y	取除骨折内固定装置		其他	陈龙	陈龙	应晓洲	桡骨内固定物取出术
383	C04综合病房	2020-09-12	2020-09-17	3019152	苏永胜	男	39Y	取除骨折内固定装置	肾结石;乙型病毒性肝炎	其他	陈龙	陈龙	应晓洲	股骨内固定物取出术
384	C04综合病房	2020-08-12	2020-09-18	3019250	郑爱鹤	女	76Y	脑梗死后遗症	高血压病;心律失常;左前分支传导阻滞;完全性右束支传导阻滞;2型糖尿病性肾病;吞咽困难;言语障碍;股骨骨折;肺部阴影;睡眠障碍;骨质疏松;肺部感染;心力衰竭;室上性心动过速;高脂血症;甲状腺结节;颈动脉硬化;下肢动脉粥样硬化;脑出血后遗症	好转	刘宝华	刘宝华	陈霜2
385	C04综合病房	2020-08-22	2020-09-22	3020614	徐迅	男	42Y	脑外伤后综合征	高尿酸血症;混合性失语;前列腺结石;脑积水;精神障碍;轻度认知障碍;高血压病;运动障碍;2型糖尿病;中度贫血;肋骨骨折;颅骨骨折	好转	刘宝华	刘宝华	216160
386	C04综合病房	2020-09-19	2020-09-23	3021105	张华剑	男	25Y	取除骨折内固定装置	肾结石;脂肪肝	其他	陈龙	陈龙	应晓洲	跖骨内固定物取出术
387	C04综合病房	2020-09-19	2020-09-23	3021183	周用芬	女	63Y	取除骨折内固定装置	脾特指疾病;肝囊肿;脂肪肝	其他	陈龙	陈龙	应晓洲	髌骨内固定物取出术
388	C04综合病房	2020-09-19	2020-09-23	3021274	洪瑞新	男	51Y	取除骨折内固定装置	颈椎关节强硬	其他	陈龙	陈龙	应晓洲	髌骨内固定物取出术
389	C04综合病房	2020-09-19	2020-09-23	3021277	许美珍	女	47Y	取除骨折内固定装置	高血压病;肝钙化灶;脂肪肝	其他	陈龙	陈龙	应晓洲	股骨内固定物取出术
390	C04综合病房	2020-09-19	2020-09-23	3021282	邓师羽	男	22Y	取除骨折内固定装置		其他	陈龙	陈龙	应晓洲	尺骨内固定物取出术
391	C04综合病房	2020-09-19	2020-09-26	3022151	周伯勋	男	50Y	取除骨折内固定装置	肝血管瘤;后天性肾囊肿;高血压病	其他	陈龙	陈龙	应晓洲	股骨内固定物取出术
392	C04综合病房	2020-09-26	2020-09-29	3023173	陈国兴	男	58Y	取除骨折内固定装置	肝回声不均;肺部阴影	其他	陈龙	陈龙	应晓洲	踝关节内固定物取出术
393	C04综合病房	2020-09-26	2020-09-29	3023181	李治勇	男	37Y	取除骨折内固定装置		其他	陈龙	陈龙	应晓洲	桡骨内固定物取出术
394	C04综合病房	2020-09-26	2020-09-30	3023353	周纯生	男	57Y	取除骨折内固定装置	腰椎间盘突出;腰椎退行性病变;陈旧性胸椎骨折	其他	陈龙	陈龙	应晓洲	桡骨内固定物取出术
395	C04综合病房	2020-09-26	2020-09-30	3023363	董文钦	男	40Y	取除骨折内固定装置	肾结石;胆囊息肉	其他	陈龙	陈龙	应晓洲	锁骨内固定物取出术
396	C04综合病房	2020-09-29	2020-09-30	3023541	王芊静	女	13Y	取除骨折内固定装置		其他	陈龙	陈龙	应晓洲	桡骨内固定物取出术
397	C04综合病房	2020-09-26	2020-09-30	3023686	郑美花	女	56Y	取除骨折内固定装置		其他	陈龙	陈龙	应晓洲	跖骨内固定物取出术
398	C04综合病房	2020-09-28	2020-10-02	3024179	支笃光	男	57Y	取除骨折内固定装置		其他	陈龙	陈龙	应晓洲	跟骨内固定物取出术
399	C04综合病房	2020-09-30	2020-10-02	3024195	张涵	男	11Y	取除骨折内固定装置		其他	陈龙	陈龙	应晓洲	尺骨内固定物取出术;桡骨内固定物取出术
400	C04综合病房	2020-09-18	2020-10-05	3025070	吴阿竹	女	82Y	基底节脑梗死	动脉粥样硬化;心房颤动;心功能不全;肋骨骨折;吞咽困难;膝关节病;肺动脉高压中度;偏瘫;腰椎骨折;胸椎骨折;大脑前动脉狭窄;肾结石;胆囊结石	好转	刘宝华	刘宝华	216159
401	C04综合病房	2020-10-07	2020-10-10	3026301	徐丽招	女	31Y	取除骨折内固定装置	脂肪肝;胆囊息肉	其他	陈龙	陈龙	应晓洲	髌骨内固定物取出术
402	C04综合病房	2020-10-07	2020-10-11	3026383	周冬娥	女	54Y	取除骨折内固定装置		其他	陈龙	陈龙	应晓洲	踝关节内固定物取出术;胫骨内固定物取出术
403	C04综合病房	2020-09-12	2020-10-12	3026757	董进花	女	70Y	多发性脑梗死	肾积水伴肾结石;偏瘫;吞咽困难;颈内动脉闭塞;大脑中动脉闭塞;大脑中动脉狭窄;尺骨桡骨闭合性骨折;动脉粥样硬化;高血压病;2型糖尿病;心律失常;椎动脉狭窄;颈内动脉狭窄;病毒性肝炎病原携带者;腰椎间盘突出;腰椎退行性病变;房性早搏;肾萎缩	好转	刘宝华	刘宝华	刘宝华
404	C04综合病房	2020-10-10	2020-10-14	3027563	王晶晶	女	30Y	取除骨折内固定装置		其他	陈龙	陈龙	应晓洲	腓骨内固定物取出术;胫骨内固定物取出术
405	C04综合病房	2020-09-18	2020-10-19	3029113	郑爱鹤	女	76Y	脑性瘫痪	室上性心动过速;高血压病;脑出血后遗症;肥厚型梗阻性心肌病;泌尿道感染;吞咽困难;脑梗死后遗症;完全性右束支传导阻滞;颈动脉硬化;上肢动脉粥样硬化;下肢动脉粥样硬化;高脂血症;股骨骨折;睡眠障碍;骨质疏松;胆囊结石;甲状腺结节;肺结节	好转	刘宝华	刘宝华	陈霜2
406	C04综合病房	2020-10-17	2020-10-21	3030127	况金发	男	29Y	取除骨折内固定装置		其他	陈龙	陈龙	应晓洲	尺骨内固定物取出术
407	C04综合病房	2020-10-17	2020-10-21	3030136	黄孝琼	女	54Y	取除骨折内固定装置		其他	陈龙	陈龙	应晓洲	腓骨内固定物取出术;胫骨内固定物取出术
408	C04综合病房	2020-09-22	2020-10-24	3030683	徐迅	男	42Y	轻度认知障碍	脑积水;混合性失语;特指手术后状态;精神障碍;高血压病;中度贫血;运动障碍;颅骨骨折;肋骨骨折;2型糖尿病;前列腺结石	好转	刘宝华	刘宝华	刘宝华
409	C04综合病房	2020-10-24	2020-10-28	3032255	徐迅	男	42Y	轻度认知障碍	脑积水;精神障碍;高血压病;2型糖尿病;轻度贫血;前列腺结石;混合性失语;运动障碍;肋骨骨折;颅骨骨折	好转	刘宝华	刘宝华	刘宝华
410	C04综合病房	2020-10-24	2020-10-28	3032351	倪庆会	男	40Y	取除骨折内固定装置	癫痫;脂肪肝;胆囊息肉	其他	陈龙	陈龙	应晓洲	肩锁关节内固定物取出术
411	C04综合病房	2020-10-24	2020-10-28	3032417	周思思	女	28Y	取除骨折内固定装置		其他	陈龙	陈龙	应晓洲	锁骨内固定物取出术
412	C04综合病房	2020-10-24	2020-10-28	3032429	周克松	男	54Y	取除骨折内固定装置	脂肪肝;后天性肾囊肿	其他	陈龙	陈龙	应晓洲	桡骨内固定物取出术;锁骨内固定物取出术
413	C04综合病房	2020-10-24	2020-10-28	3032433	丁玉花	女	54Y	取除骨折内固定装置		其他	王振文	水小龙	水小龙	胫骨内固定物取出术
414	C04综合病房	2020-09-26	2020-10-29	3032610	沈阳光	男	77Y	多发性脑梗死	偏瘫;胃溃疡;吞咽困难;下肢动脉粥样硬化;2型糖尿病;老年性痴呆;骨质疏松;泌尿道感染;腰椎骨折;肺部感染	好转	刘宝华	刘宝华	刘宝华
415	C04综合病房	2020-10-24	2020-11-01	3033805	徐永通	男	51Y	取除骨折内固定装置	后天性肾囊肿;前列腺结石	其他	王振文	水小龙	水小龙	尺骨内固定物取出术
416	C04综合病房	2020-11-01	2020-11-07	3035545	何玲影	女	53Y	取除骨折内固定装置	2型糖尿病	其他	王振文	水小龙	水小龙	踝关节内固定物取出术
417	C04综合病房	2020-11-07	2020-11-11	3037069	司文艳	女	9Y	取除骨折内固定装置		其他	陈龙	陈龙	应晓洲	股骨内固定物取出术
418	C04综合病房	2020-11-07	2020-11-14	3037993	林元料	男	45Y	特指部位骨折不连接	取除骨折内固定装置;脂肪肝	治愈	陈龙	陈龙	应晓洲	尺骨内固定物取出术;髂骨植骨术
419	C04综合病房	2020-11-15	2020-11-17	3039281	周玉燕	女	40Y	取除骨折内固定装置	陈旧性耻骨骨折	其他	陈龙	陈龙	应晓洲	锁骨内固定物取出术
420	C04综合病房	2020-10-19	2020-11-18	3039343	郑爱鹤	女	76Y	四肢瘫痪	高血压病;言语障碍;吞咽困难;2型糖尿病性肾病;轻度贫血;肺结节;股骨骨折;睡眠障碍;骨质疏松;泌尿道感染;肾衰竭;肺部感染;心力衰竭;室上性心动过速;高脂血症;甲状腺结节;颈动脉硬化;下肢动脉粥样硬化;上肢动脉粥样硬化;脑梗死后遗症	治愈	刘宝华	刘宝华	陈霜2
421	C04综合病房	2020-11-14	2020-11-18	3039404	朱爱媚	女	46Y	取除骨折内固定装置	高血压病;胆囊切除术后状态	其他	陈龙	陈龙	应晓洲	胫骨内固定物取出术;腓骨内固定物取出术
422	C04综合病房	2020-11-14	2020-11-18	3039440	连长寿	男	52Y	取除骨折内固定装置	胆囊肿大;前列腺囊肿;胆汁淤积症	其他	赵友明	赵友明	郭伟军	椎骨内固定物取出术;锁骨内固定物取出术
423	C04综合病房	2020-11-21	2020-11-23	3041407	王菊妹	女	57Y	取除骨折内固定装置		其他	陈华	周一飞	216123	锁骨内固定物取出术
424	C04综合病房	2020-11-21	2020-11-25	3041947	蔺娜	女	10Y	取除骨折内固定装置		其他	陈龙	陈龙	应晓洲	尺骨内固定物取出术
425	C04综合病房	2020-11-21	2020-11-26	3042272	吴丽慧	女	22Y	胫腓骨下端骨折		治愈	陈龙	陈龙	应晓洲	腓骨骨折切开复位钢板内固定术
426	C04综合病房	2020-11-21	2020-11-26	3042274	朱祥安	男	61Y	取除骨折内固定装置		其他	陈华	周一飞	216123	胫骨内固定物取出术;腓骨内固定物取出术
427	C04综合病房	2020-11-21	2020-11-30	3043621	陈策	男	40Y	检查外固定装置	陈旧性肋骨骨折;胆囊胆固醇沉着症;肾结石	其他	陈龙	陈龙	应晓洲	外固定架固定
428	C04综合病房	2020-11-28	2020-11-30	3043622	陈小芳	女	42Y	取除骨折内固定装置	甲状腺恶性肿瘤个人史	其他	陈龙	陈龙	应晓洲	桡骨内固定物取出术
429	C04综合病房	2020-11-28	2020-12-01	3043931	连奔杰	男	7Y	取除骨折内固定装置		其他	陈龙	陈龙	应晓洲	桡骨内固定物取出术;尺骨内固定物取出术
430	C04综合病房	2020-11-21	2020-12-01	3044088	冯赛慧	男	26Y	取除骨折内固定装置	精神分裂症;脂肪肝	其他	陈龙	陈龙	应晓洲	跟骨内固定物取出术;椎骨内固定物取出术
431	C04综合病房	2020-12-05	2020-12-09	3046715	项祖龙	男	48Y	取除骨折内固定装置	后天性肾囊肿	其他	陈龙	陈龙	应晓洲	跟骨内固定物取出术
432	C04综合病房	2020-12-05	2020-12-09	3046750	余浩博	男	6Y	取除骨折内固定装置		其他	陈龙	陈龙	应晓洲	桡骨内固定物取出术;尺骨内固定物取出术
433	C04综合病房	2020-11-09	2020-12-09	3046893	沈阳光	男	77Y	多发性脑梗死	泌尿道感染;肺部感染;老年性痴呆;偏瘫;吞咽困难;胃溃疡;2型糖尿病;低蛋白血症;胆囊结石;下肢动脉粥样硬化;骨质疏松伴病理性骨折	好转	刘宝华	刘宝华	钟燕彪
434	C04综合病房	2020-12-05	2020-12-10	3047015	陈胜发	男	59Y	取除骨折内固定装置	慢性骨髓炎;高血压病;脂肪肝	其他	陈龙	陈龙	应晓洲	踝关节内固定物取出术
435	C04综合病房	2020-12-07	2020-12-10	3047097	陈彩凤	女	62Y	取除骨折内固定装置	糖尿病;脂肪肝	其他	陈龙	陈龙	应晓洲	踝关节内固定物取出术
436	C04综合病房	2020-12-12	2020-12-13	3048045	徐良岁	男	59Y	取除骨折内固定装置		其他	陈龙	陈龙	应晓洲
437	C04综合病房	2020-12-12	2020-12-16	3049248	陈加银	男	43Y	取除骨折内固定装置	后天性肾囊肿	其他	陈龙	陈龙	应晓洲	腓骨内固定物取出术;胫骨内固定物取出术
438	C04综合病房	2020-11-18	2020-12-19	3049758	郑爱鹤	女	76Y	肺部感染	室上性心动过速;甲状腺结节;胆囊结石;骨质疏松;睡眠障碍;股骨骨折;高脂血症;下肢动脉粥样硬化;颈动脉硬化;心力衰竭;泌尿道感染;吞咽困难;言语障碍;左前分支传导阻滞;完全性右束支传导阻滞;肥厚型梗阻性心肌病;肾衰竭;轻度贫血;肺结节	好转	刘宝华	刘宝华	陈霜2
439	C04综合病房	2020-12-19	2020-12-22	3051037	魏秋兰	女	58Y	取除骨折内固定装置	高血压病;2型糖尿病;脂肪肝	其他	陈龙	陈龙	应晓洲	尺骨内固定物取出术
440	C04综合病房	2020-12-17	2020-12-23	3051360	林少兰	女	42Y	取除骨折内固定装置		其他	汤骏	吴剑彬	吴剑彬	髌骨内固定物取出术
441	C04综合病房	2020-12-19	2020-12-24	3051769	贾胜敬	男	55Y	取除骨折内固定装置	慢性乙型病毒性肝炎;肩周炎;颈椎关节强硬;高血压病;脂肪肝;2型糖尿病	其他	陈龙	陈龙	应晓洲	肱骨内固定物取出术
442	C04综合病房	2020-12-24	2020-12-25	3052007	胡开	男	37Y	取除骨折内固定装置		其他	陈龙	陈龙	应晓洲	踝关节内固定物取出术
443	C04综合病房	2020-12-21	2020-12-26	3052275	陈隆鹏	男	50Y	取除骨折内固定装置	肝囊肿	其他	陈龙	陈龙	应晓洲	胫骨内固定物取出术;腓骨内固定物取出术
444	C04综合病房	2020-12-21	2020-12-26	3052340	杨立明	男	56Y	取除骨折内固定装置	高血压病;脂肪肝	其他	陈龙	陈龙	应晓洲	踝关节内固定物取出术
445	C04综合病房	2020-12-26	2020-12-30	3053779	姜素清	女	35Y	取除骨折内固定装置	高血压病;脂肪肝	其他	陈龙	陈龙	应晓洲	踝关节内固定物取出术
446	C05疼痛科	2019-12-28	2020-01-04	2937735	陈冬连	女	69Y	腰椎间盘突出	骨质疏松;陈旧性肋骨骨折	好转	许峰	许峰	何伶俐
447	C05疼痛科	2019-12-28	2020-01-05	2938127	吴连香	女	74Y	骨质疏松	特指手术后状态;胸椎骨折;康复操作医疗	好转	占恭豪	占恭豪	王佩芳
448	C05疼痛科	2019-12-29	2020-01-06	2938402	施美英	女	60Y	骨质疏松	高血压病;胸椎骨折;腰椎骨折	好转	占恭豪	占恭豪	王佩芳
449	C05疼痛科	2020-01-06	2020-01-08	2938971	杨胜传	男	58Y	腰椎骨折	特指手术后状态	好转	许峰	许峰	何伶俐
450	C05疼痛科	2019-12-31	2020-01-11	2939681	林新娇	女	87Y	骨质疏松	腰椎骨折;胸椎骨折	好转	占恭豪	占恭豪	黄茜茜
451	C05疼痛科	2019-12-29	2020-01-12	2940141	吕丽珍	女	74Y	类风湿性关节炎	特指手术后状态;颈动脉硬化;锁骨下动脉粥样硬化;高脂血症;2型糖尿病;陈旧性肋骨骨折;高血压性心脏病;高血压病	好转	许峰	许峰	何伶俐
452	C05疼痛科	2020-01-08	2020-01-14	2940855	郑朝中	男	22Y	取除骨折内固定装置		其他	洪建军	洪建军	胡炜	跖骨内固定物取出术
453	C05疼痛科	2020-01-12	2020-01-16	2941439	毛月娇	女	59Y	取除骨折内固定装置		其他	黄俊武	黄俊武	李振兴	踝关节内固定物取出术
454	C05疼痛科	2020-01-12	2020-01-16	2941477	戴吴梅	女	64Y	取除骨折内固定装置		其他	黄俊武	黄俊武	李振兴	胫骨内固定物取出术;腓骨内固定物取出术
455	C05疼痛科	2020-01-07	2020-01-16	2941589	许子骞	男	9Y	桡骨头骨折		好转	黄俊武	黄俊武	李振兴	桡骨骨折切开复位螺钉内固定术
456	C05疼痛科	2020-01-12	2020-01-18	2941860	徐亚民	男	66Y	取除骨折内固定装置		其他	黄俊武	黄俊武	李振兴	胫骨内固定物取出术;腓骨内固定物取出术
457	C05疼痛科	2020-01-18	2020-01-22	2943246	徐花妹	女	74Y	骨质疏松	高血压病;胸椎骨折	好转	占恭豪	占恭豪	黄茜茜
458	C05疼痛科	2020-01-11	2020-01-23	2943619	黄阿芬	女	70Y	骨质疏松	胸椎骨折	好转	占恭豪	占恭豪	黄茜茜
459	C05疼痛科	2020-01-11	2020-01-23	2943631	周美英	女	77Y	原发性单侧膝关节病	骨质疏松;冠状动脉粥样硬化性心脏病;心房颤动;变异型心绞痛;高血压病;胸椎骨折	好转	占恭豪	占恭豪	黄茜茜
460	C05疼痛科	2020-01-15	2020-01-25	2943959	叶克喜	男	77Y	腰椎骨折	高血压病	好转	许峰	许峰	何伶俐
461	C05疼痛科	2020-01-18	2020-01-25	2944081	张健鸿	女	47Y	取除骨折内固定装置		其他	赵友明	赵友明	郭伟军	髌骨内固定物取出术
462	C05疼痛科	2020-01-19	2020-01-26	2944438	李红玉	女	78Y	骨质疏松	甲状腺机能减退症;胸椎骨折	好转	占恭豪	王佩芳	黄茜茜
463	C05疼痛科	2020-01-18	2020-01-27	2944897	庄秋兰	女	76Y	骨质疏松伴病理性骨折		好转	许峰	许峰	何伶俐
464	C05疼痛科	2020-01-27	2020-01-27	2945060	林贤锁	男	37Y	股骨粗隆间骨折	特指手术后状态	未愈	黄义星	黄义星	谢君青
465	C05疼痛科	2020-01-21	2020-01-28	2945151	朱昌槐	男	84Y	骨质疏松伴病理性骨折	前列腺恶性肿瘤	好转	占恭豪	王佩芳	黄茜茜
466	C05疼痛科	2020-01-18	2020-01-29	2945497	阮仙花	女	81Y	骨质疏松伴病理性骨折	脊柱侧弯	好转	占恭豪	占恭豪	黄茜茜
467	C05疼痛科	2020-01-25	2020-01-29	2945515	杨宝英	女	78Y	骨质疏松伴病理性骨折		好转	占恭豪	占恭豪	黄茜茜
468	C05疼痛科	2020-01-27	2020-02-01	2946450	陈祉璇	女	19Y	取除骨折内固定装置		其他	王振文	水小龙	水小龙	尺骨内固定物取出术
469	C05疼痛科	2020-01-19	2020-02-01	2946457	夏德柳	女	87Y	骨质疏松伴病理性骨折	老年性脑萎缩;高血压病;多发性脑梗死;基底节脑梗死;腔隙性脑梗死;肺部感染	好转	许峰	许峰	何伶俐
470	C05疼痛科	2020-01-22	2020-02-01	2946471	郑玉香	女	78Y	骨质疏松伴病理性骨折		好转	占恭豪	占恭豪	王佩芳
471	C05疼痛科	2020-01-28	2020-02-01	2946476	刘许仁	男	88Y	胸椎骨折	骨质疏松	好转	占恭豪	占恭豪	王佩芳
472	C05疼痛科	2020-01-21	2020-02-04	2947723	林淑媚	女	76Y	骨质疏松伴病理性骨折	胃溃疡	好转	许峰	许峰	何伶俐
473	C05疼痛科	2020-01-28	2020-02-05	2948073	陈秀凤	女	72Y	骨质疏松伴病理性骨折	高血压病	好转	占恭豪	占恭豪	王佩芳
474	C05疼痛科	2020-02-16	2020-02-21	2951981	谢芝兰	女	71Y	腰椎骨折		好转	占恭豪	占恭豪	黄茜茜
475	C05疼痛科	2020-02-15	2020-02-22	2952048	孙保兰	女	58Y	骨质疏松伴病理性骨折		好转	占恭豪	占恭豪	王佩芳
476	C05疼痛科	2020-02-15	2020-02-23	2952429	黄菊花	女	73Y	骨质疏松伴病理性骨折		好转	占恭豪	占恭豪	王佩芳
477	C05疼痛科	2020-02-14	2020-02-23	2952440	吴明增	男	65Y	骨质疏松伴病理性骨折	高血压病;帕金森综合征;颈椎关节强硬;前列腺结石;高脂血症	好转	许峰	许峰	何伶俐
478	C05疼痛科	2020-02-18	2020-02-25	2952802	黄月影	女	80Y	骨质疏松伴病理性骨折	脑梗死;2型糖尿病;高血压病;胆囊炎	好转	占恭豪	占恭豪	王佩芳
479	C05疼痛科	2020-02-14	2020-02-26	2953460	柯兰芬	女	83Y	骨质疏松伴病理性骨折	支气管哮喘，非危重	好转	许峰	许峰	何伶俐
480	C05疼痛科	2020-02-23	2020-02-29	2954156	黄玉英	女	82Y	骨质疏松伴病理性骨折		好转	占恭豪	占恭豪	王佩芳
481	C05疼痛科	2020-02-22	2020-02-29	2954177	林永章	男	62Y	腰椎骨折	糖尿病;腰椎间盘突出	好转	占恭豪	占恭豪	占恭豪
482	C05疼痛科	2020-02-15	2020-02-29	2954178	孙福兰	女	75Y	骨质疏松伴病理性骨折	回旋套破裂;高血压病;肩关节关节病	好转	占恭豪	占恭豪	王佩芳
483	C05疼痛科	2020-02-19	2020-02-29	2954181	陈玉霜	女	80Y	骨质疏松伴病理性骨折		好转	占恭豪	占恭豪	王佩芳
484	C05疼痛科	2020-03-02	2020-03-10	2957592	吕丽珍	女	74Y	类风湿性关节炎	特指手术后状态;颈动脉硬化;锁骨下动脉粥样硬化;高脂血症;2型糖尿病;陈旧性肋骨骨折;高血压性心脏病;高血压病	好转	许峰	许峰	何伶俐
485	C05疼痛科	2020-03-03	2020-03-10	2957604	徐菊花	女	66Y	骨质疏松伴病理性骨折	高血压病	好转	占恭豪	占恭豪	黄茜茜
486	C05疼痛科	2020-03-04	2020-03-11	2957968	周苏月	男	65Y	骨质疏松伴病理性骨折		好转	许峰	许峰	何伶俐
487	C05疼痛科	2020-03-07	2020-03-15	2959179	郑尧定	男	80Y	骨质疏松伴病理性骨折	腰椎间盘突出;糖尿病;高血压病	好转	占恭豪	占恭豪	黄茜茜
488	C05疼痛科	2020-03-09	2020-03-16	2959520	叶彩弟	女	59Y	骨质疏松伴病理性骨折		好转	许峰	许峰	何伶俐
489	C05疼痛科	2020-03-17	2020-03-21	2960856	许怡诺	女	8Y	取除骨折内固定装置		其他	余可和	余可和	余可和	肱骨内固定物取出术
490	C05疼痛科	2020-03-08	2020-03-22	2961590	李娒弟	女	79Y	骨质疏松伴病理性骨折	颈椎关节强硬;高血压病	好转	许峰	许峰	何伶俐
491	C05疼痛科	2020-02-25	2020-03-23	2961687	叶玉花	女	77Y	腰椎间盘突出	骨质疏松;脑梗死;胸椎骨折	好转	占恭豪	占恭豪	黄茜茜	脊髓神经根粘连松解术;腰椎间盘髓核切除术;椎间盘射频消融术;椎管探查术
492	C05疼痛科	2020-03-04	2020-03-24	2961963	林碎媚	女	73Y	骨质疏松伴病理性骨折	股骨头无菌性坏死;髋关节半脱位	好转	许峰	许峰	何伶俐
493	C05疼痛科	2020-03-22	2020-03-24	2962107	张秀琴	女	51Y	全身性广泛继发恶性肿瘤	甲状腺恶性肿瘤个人史;病理性骨折;脊髓病	未愈	吴剑	陈文俊	陈文俊
494	C05疼痛科	2020-03-21	2020-03-28	2963035	蒋学贵	男	79Y	骨质疏松伴病理性骨折		好转	占恭豪	占恭豪	黄茜茜
495	C05疼痛科	2020-03-10	2020-03-28	2963071	林美叶	女	73Y	骨质疏松伴病理性骨折	肺部感染;贫血;胸腔积液	好转	占恭豪	申帮利	申帮利
496	C05疼痛科	2020-03-08	2020-03-29	2963570	傅爱莲	女	81Y	骨质疏松伴病理性骨折		好转	许峰	许峰	何伶俐
497	C05疼痛科	2020-02-26	2020-03-30	2963820	余战英	女	64Y	多处挫伤	胸椎骨折;骨质疏松;肺炎;肋骨骨折;高血压病;后天性肾囊肿;肾结石;特指手术后状态	好转	许峰	许峰	何伶俐
498	C05疼痛科	2020-02-26	2020-03-30	2963873	王彩云	女	64Y	下肢骨继发恶性肿瘤	高血压病;全身性广泛继发恶性肿瘤;病理性骨折;肾上腺肿物;糖尿病;肺恶性肿瘤;空洞型肺结核	好转	吴剑	吴剑	何泽来	股骨骨折切开复位髓内针内固定术;股骨病损切除术
499	C05疼痛科	2020-03-01	2020-04-01	2964544	汪美香	女	71Y	骨质疏松	腰椎骨折;高血压病;胸椎骨折	好转	许峰	许峰	何伶俐
500	C05疼痛科	2020-03-28	2020-04-01	2964546	林其管	男	38Y	取除骨折内固定装置		其他	陈龙	陈龙	陈龙	肱骨内固定物取出术
501	C05疼痛科	2020-03-28	2020-04-01	2964710	金铼祥	男	43Y	取除骨折内固定装置	前列腺结石	其他	张宇	陈成旺	陈成旺	胫骨内固定物取出术
502	C05疼痛科	2020-03-28	2020-04-02	2964922	耿成辉	男	21Y	取除骨折内固定装置		其他	陈龙	陈龙	陈龙	股骨内固定物取出术
503	C05疼痛科	2020-03-28	2020-04-05	2965383	郑秀英	女	82Y	原发性双侧膝关节病	高血压病;骨质疏松伴病理性骨折	好转	占恭豪	占恭豪	黄茜茜
504	C05疼痛科	2020-04-02	2020-04-09	2966920	单银榜	男	70Y	双踝骨折		治愈	蒋良福	蒋良福	王安远	踝关节骨折切开复位螺钉内固定术
505	C05疼痛科	2020-04-08	2020-04-14	2968293	朱传枝	女	67Y	骨质疏松伴病理性骨折		好转	许峰	许峰	何伶俐
506	C05疼痛科	2020-03-21	2020-04-15	2968626	戴秀连	女	68Y	骨质疏松伴病理性骨折	慢性肾炎综合征;糖尿病	好转	占恭豪	占恭豪	黄茜茜
507	C05疼痛科	2020-04-07	2020-04-16	2968984	夏诒贺	男	67Y	多发性胸椎骨折	多发性腰椎骨折	好转	占恭豪	占恭豪	黄茜茜
508	C05疼痛科	2020-04-18	2020-04-22	2970807	刘登芬	女	47Y	取除骨折内固定装置		其他	余可和	余可和	余可和	尺骨内固定物取出术;桡骨内固定物取出术
509	C05疼痛科	2020-03-13	2020-04-22	2971182	蔡秋芽	女	54Y	躯干骨继发恶性肿瘤	对症治疗;为肿瘤化学治疗疗程;病理性骨折;乳腺恶性肿瘤	好转	吴剑	吴剑	何泽来	腰椎骨折球囊扩张成形术
510	C05疼痛科	2020-04-17	2020-04-23	2971335	林高春	男	45Y	取除骨折内固定装置	腹腔血管瘤;前列腺结石;胆囊息肉;脂肪肝	其他	孔建中	王鉴顺	柯陈荣	胫骨内固定物取出术
511	C05疼痛科	2020-04-13	2020-04-26	2972039	王兰香	女	61Y	骨质疏松伴病理性骨折	高血压病	好转	许峰	许峰	何伶俐
512	C05疼痛科	2020-04-06	2020-04-26	2972043	郑谦花	女	75Y	腰椎间盘突出	骨质疏松伴病理性骨折	治愈	许峰	许峰	何伶俐	腰椎间盘髓核切除术;脊髓神经根粘连松解术;椎间盘射频消融术
513	C05疼痛科	2020-04-25	2020-04-28	2972860	李茂发	男	83Y	骨质疏松伴病理性骨折	腰椎间盘突出	好转	占恭豪	占恭豪	黄茜茜
514	C05疼痛科	2020-02-25	2020-04-29	2973236	杨宝莲	女	81Y	骨质疏松伴病理性骨折	颈椎关节强硬;高血压病	好转	占恭豪	占恭豪	黄茜茜
515	C05疼痛科	2020-05-04	2020-05-05	2975100	邱株仙	女	71Y	腰椎椎管狭窄	腰椎滑脱;高血压病;骨质疏松伴病理性骨折;2型糖尿病;脂肪肝	好转	许峰	许峰	何伶俐
516	C05疼痛科	2020-04-27	2020-05-06	2975253	吕丽珍	女	74Y	类风湿性关节炎	颈动脉硬化;锁骨下动脉粥样硬化;高血压病;特指手术后状态;陈旧性肋骨骨折;高血压性心脏病;高脂血症;2型糖尿病	好转	许峰	许峰	何伶俐
517	C05疼痛科	2020-05-04	2020-05-18	2979003	贾松菊	女	55Y	骨折内固定术后疼痛	下肢神经痛;下肢动脉栓塞;糖尿病	好转	占恭豪	申帮利	申帮利
518	C05疼痛科	2020-05-03	2020-05-20	2979762	林凤钗	女	83Y	骨质疏松伴病理性骨折	高血压病;2型糖尿病;肺恶性肿瘤;胃恶性肿瘤	好转	许峰	许峰	何伶俐
519	C05疼痛科	2020-05-20	2020-05-30	2982737	冯阿芽	女	75Y	骨质疏松伴病理性骨折		好转	占恭豪	占恭豪	王佩芳
520	C05疼痛科	2020-05-16	2020-05-31	2983221	黄松妹	女	82Y	骨质疏松伴病理性骨折	高血压病	好转	许峰	许峰	何伶俐
521	C05疼痛科	2020-06-02	2020-06-08	2985925	李领花	女	87Y	骨质疏松	高血压病;髋关节置换术后疼痛;陈旧性脊柱骨折	好转	占恭豪	占恭豪	王佩芳
522	C05疼痛科	2020-06-06	2020-06-11	2986628	戴玉香	女	62Y	骨质疏松伴病理性骨折	类风湿性关节炎	好转	占恭豪	占恭豪	王佩芳
523	C05疼痛科	2020-06-06	2020-06-12	2986929	夏玉荣	男	62Y	腰椎滑脱	胸椎骨折;腰椎峡部裂	好转	许峰	许峰	何伶俐
524	C05疼痛科	2020-05-31	2020-06-14	2987583	金荼蘼	女	79Y	骨质疏松伴病理性骨折	脊柱压缩性骨折;多部位神经痛;高血压病;2型糖尿病	好转	许峰	许峰	何伶俐
525	C05疼痛科	2020-06-13	2020-06-16	2988217	韩晓华	女	45Y	腰椎骨折		好转	占恭豪	占恭豪	王佩芳
526	C05疼痛科	2020-06-05	2020-06-17	2988874	董桂花	女	64Y	骨质疏松	腰椎骨折	好转	占恭豪	占恭豪	王佩芳
527	C05疼痛科	2020-06-08	2020-06-20	2989420	陈爱华	女	66Y	骨质疏松伴病理性骨折	腰椎骨折;腰椎间盘退行性病变	好转	许峰	许峰	何伶俐
528	C05疼痛科	2020-06-13	2020-06-20	2989469	周玉花	女	85Y	骨质疏松伴病理性骨折	高血压病	好转	占恭豪	占恭豪	王佩芳
529	C05疼痛科	2020-06-13	2020-06-22	2990208	平冬兰	女	68Y	骨质疏松伴病理性骨折		好转	占恭豪	占恭豪	王佩芳
530	C05疼痛科	2020-05-31	2020-06-24	2990948	金秋秋	女	63Y	骨质疏松伴病理性骨折	脊柱压缩性骨折	好转	许峰	许峰	何伶俐
531	C05疼痛科	2020-06-16	2020-06-27	2991609	沈娇兰	女	62Y	骨质疏松	踝筋膜炎;脊柱骨折	治愈	占恭豪	占恭豪	王佩芳
532	C05疼痛科	2020-06-20	2020-06-27	2991663	叶荷芳	女	74Y	骨质疏松伴病理性骨折	椎管狭窄	好转	占恭豪	占恭豪	王佩芳
533	C05疼痛科	2020-06-28	2020-06-29	2992679	程群	男	32Y	肱骨骨折		治愈	陈星隆	陈星隆	林大木
534	C05疼痛科	2020-06-20	2020-06-30	2992802	许锦福	男	74Y	骨质疏松伴病理性骨折	高血压病	好转	占恭豪	占恭豪	王佩芳
535	C05疼痛科	2020-06-15	2020-07-04	2993951	王信元	男	81Y	颈椎间盘突出	肺部感染;肺大泡;陈旧性肋骨骨折	治愈	占恭豪	申帮利	申帮利
536	C05疼痛科	2020-06-27	2020-07-06	2994768	翁连英	女	81Y	骨质疏松伴病理性骨折	高血压病	好转	占恭豪	占恭豪	王佩芳
537	C05疼痛科	2020-06-27	2020-07-08	2995531	干秋凤	女	64Y	骨质疏松伴病理性骨折		治愈	占恭豪	占恭豪	王佩芳
538	C05疼痛科	2020-06-27	2020-07-08	2995553	林友贞	男	53Y	脊柱骨折		好转	占恭豪	占恭豪	王佩芳
539	C05疼痛科	2020-07-05	2020-07-11	2996232	诸葛玲凤	女	80Y	骨质疏松伴病理性骨折	高血压病	治愈	占恭豪	占恭豪	王佩芳
540	C05疼痛科	2020-07-01	2020-07-11	2996263	张秀莲	女	73Y	腰椎间盘突出	脑梗死后遗症;高血压病;骨质疏松伴病理性骨折;糖尿病	治愈	占恭豪	占恭豪	王佩芳	腰椎间盘髓核切除术;神经根管松解术;椎间盘射频消融术
541	C05疼痛科	2020-06-14	2020-07-12	2997016	李佩英	女	69Y	颈椎关节强硬	骨质疏松伴病理性骨折;高血压病;败血症	好转	许峰	许峰	何伶俐
542	C05疼痛科	2020-06-28	2020-07-15	2997782	姜庆荣	男	62Y	骨继发恶性肿瘤	病理性骨折;肾恶性肿瘤	好转	许峰	许峰	何伶俐	腰动脉栓塞术;神经根管松解术
543	C05疼痛科	2020-07-05	2020-07-15	2997809	杨阿翠	女	83Y	腰椎间盘突出	高血压病;骨质疏松伴病理性骨折;神经痛	好转	许峰	许峰	何伶俐
544	C05疼痛科	2020-07-08	2020-07-19	2999124	蔡祖和	男	64Y	腰椎间盘突出	高血压病;脊柱压缩性骨折	好转	许峰	许峰	何伶俐
545	C05疼痛科	2020-07-14	2020-07-22	3000540	潘蓝眼	女	84Y	骨质疏松	胸椎骨折;十二指肠溃疡;胃溃疡;胃恶性肿瘤	治愈	占恭豪	申帮利	申帮利
546	C05疼痛科	2020-07-12	2020-07-23	3000647	陈佩兰	女	75Y	骨质疏松伴病理性骨折	高血压病;冠状动脉介入治疗后随诊检查	好转	许峰	许峰	何伶俐
547	C05疼痛科	2020-07-14	2020-07-26	3001535	郑国香	女	62Y	腰椎间盘突出	脊柱骨折;骨质疏松	好转	占恭豪	占恭豪	王佩芳
548	C05疼痛科	2020-07-11	2020-07-28	3002277	叶文文	女	73Y	骨质疏松伴病理性骨折		好转	占恭豪	占恭豪	王佩芳
549	C05疼痛科	2020-07-31	2020-08-01	3003810	白嫣其	女	5Y	开放性胫腓骨干骨折		未愈	张敬东	易先宏	王伟
550	C05疼痛科	2020-07-28	2020-08-04	3004511	郑秀琴	女	83Y	骨质疏松伴病理性骨折	高血压病;脊柱骨折	治愈	占恭豪	占恭豪	王佩芳
551	C05疼痛科	2020-07-25	2020-08-04	3004655	吕陈兰	女	73Y	骨质疏松伴病理性骨折	冠状动脉粥样硬化性心脏病;高血压病	治愈	占恭豪	占恭豪	王佩芳
552	C05疼痛科	2020-07-26	2020-08-05	3004937	黄阿娥	女	62Y	骨质疏松伴病理性骨折		好转	许峰	许峰	何伶俐	外周神经射频消融术
553	C05疼痛科	2020-08-02	2020-08-05	3004950	余招弟	女	84Y	骨质疏松伴病理性骨折	椎管狭窄	好转	许峰	许峰	何伶俐
554	C05疼痛科	2020-08-02	2020-08-08	3005836	谷志秀	女	62Y	骨质疏松伴病理性骨折	颈椎关节强硬	好转	许峰	许峰	何伶俐
555	C05疼痛科	2020-07-26	2020-08-08	3005871	李世德	男	75Y	带状疱疹性神经痛	2型糖尿病;脊柱骨折	好转	许峰	许峰	何伶俐
556	C05疼痛科	2020-07-25	2020-08-09	3006318	吴彩香	女	79Y	骨质疏松	心房颤动;心力衰竭;胸椎骨折;多发性脑梗死	治愈	占恭豪	占恭豪	王佩芳
557	C05疼痛科	2020-08-07	2020-08-09	3006489	洪昆妹	女	83Y	股骨粗隆间骨折	下肢动脉粥样硬化;高血压病;桡骨骨折;脑梗死;上颌窦筛窦炎	好转	陈龙	陈龙	陈龙
558	C05疼痛科	2020-08-03	2020-08-10	3006817	夏林香	女	77Y	骨质疏松	肋骨骨折;帕金森病;胸椎骨折;腰椎骨折	好转	占恭豪	占恭豪	王佩芳
559	C05疼痛科	2020-08-08	2020-08-11	3006969	匡星火	男	14Y	取除骨折内固定装置	肝钙化灶	其他	赵友明	赵友明	赵友明	桡骨内固定物取出术
560	C05疼痛科	2020-07-26	2020-08-12	3007510	冯志压	男	70Y	神经痛	纵隔肿瘤;特指部位骨折不连接	治愈	占恭豪	申帮利	申帮利
561	C05疼痛科	2020-08-05	2020-08-13	3007710	杨永妹	女	64Y	骨质疏松伴病理性骨折		好转	许峰	许峰	何伶俐
562	C05疼痛科	2020-08-08	2020-08-14	3008007	王海涛	男	23Y	桡骨下端骨折	腕部挫伤	治愈	余可和	余可和	柯陈荣	桡骨骨折闭合复位术;桡骨外固定术
563	C05疼痛科	2020-08-04	2020-08-15	3008154	柯来春	女	69Y	骨质疏松伴病理性骨折	腰椎滑脱;1型糖尿病;高血压病	好转	占恭豪	占恭豪	王佩芳
564	C05疼痛科	2020-08-08	2020-08-16	3008624	黄金前	男	48Y	腓骨骨折	膝关节副韧带劳损;闭合性胫骨平台骨折	好转	余可和	余可和	柯陈荣	胫骨骨折切开复位髓内针内固定术;韧带修补术
565	C05疼痛科	2020-08-09	2020-08-18	3009222	陈超华	男	65Y	股骨粗隆间骨折	高血压病;脊髓灰质炎后遗症;冠状动脉粥样硬化性心脏病;癫痫	治愈	洪建军	余洋	余洋
566	C05疼痛科	2020-08-16	2020-08-30	3013409	金来香	女	80Y	腰椎间盘突出	骨质疏松伴病理性骨折;股骨头无菌性坏死	好转	占恭豪	许峰	何伶俐
567	C05疼痛科	2020-08-22	2020-08-30	3013594	袁兰英	女	72Y	腰椎间盘突出	特指手术后状态;多关节炎;胸椎骨折	好转	占恭豪	许峰	何伶俐
568	C05疼痛科	2020-08-22	2020-08-31	3013793	尤玉香	女	82Y	颈椎关节强硬	骨质疏松伴病理性骨折;高血压病	好转	占恭豪	许峰	何伶俐	外周神经射频消融术
569	C05疼痛科	2020-08-19	2020-08-31	3013993	蔡秋芽	女	55Y	恶性肿瘤的维持性化疗	骨折治疗后恢复期;乳腺恶性肿瘤;脊柱恶性肿瘤	好转	吴剑	吴剑	何泽来
570	C05疼痛科	2020-08-03	2020-09-01	3014067	颜桂兰	女	77Y	腰椎滑脱	骨质疏松伴病理性骨折;高血压病;腰椎间盘突出	治愈	占恭豪	占恭豪	王佩芳	腰椎间盘髓核切除术;椎间盘射频消融术;神经根管松解术
571	C05疼痛科	2020-08-22	2020-09-02	3014427	杨兰芳	女	70Y	骨质疏松伴病理性骨折	肩周炎	治愈	占恭豪	占恭豪	王佩芳	按摩手法治疗
572	C05疼痛科	2020-09-06	2020-09-12	3017473	方秀琴	女	70Y	骨质疏松伴病理性骨折	高血压病	好转	占恭豪	占恭豪	王佩芳
573	C05疼痛科	2020-08-30	2020-09-13	3017900	孙伯武	男	83Y	骨质疏松伴病理性骨折	腰椎退行性病变;闭塞性周围动脉粥样硬化;高血压病	好转	许峰	许峰	何伶俐	外周神经射频消融术
574	C05疼痛科	2020-09-12	2020-09-19	3019595	傅小花	女	75Y	颈椎关节强硬	高血压病;骨质疏松伴病理性骨折;2型糖尿病	好转	占恭豪	占恭豪	王佩芳
575	C05疼痛科	2020-09-05	2020-09-21	3020365	马秀兰	女	67Y	骨质疏松	2型糖尿病;胸椎骨折	好转	占恭豪	占恭豪	王佩芳	外周神经射频消融术
576	C05疼痛科	2020-09-18	2020-09-22	3020720	蒋新媛	女	83Y	骨质疏松	腰椎骨折	好转	许峰	许峰	何伶俐
577	C05疼痛科	2020-09-23	2020-09-28	3022647	王玉香	女	68Y	骨质疏松伴病理性骨折		治愈	许峰	许峰	何伶俐
578	C05疼痛科	2020-09-19	2020-09-29	3023057	张如苗	女	84Y	骨质疏松伴病理性骨折	2型糖尿病;神经痛	好转	占恭豪	占恭豪	黄茜茜
579	C05疼痛科	2020-09-25	2020-10-02	3024275	詹武	男	43Y	踝关节脱位	腓骨骨折	治愈	洪建军	余洋	余洋	胫骨骨折切开复位钢板内固定术;踝关节骨折切开复位术
580	C05疼痛科	2020-09-29	2020-10-04	3024684	张兰花	女	67Y	骨质疏松伴病理性骨折	高脂血症	治愈	占恭豪	占恭豪	王佩芳
581	C05疼痛科	2020-10-07	2020-10-11	3026490	叶丽丽	女	70Y	骨质疏松伴病理性骨折	恶性肿瘤手术后随诊检查;骨继发恶性肿瘤;高血压病;2型糖尿病	好转	许峰	许峰	何伶俐
582	C05疼痛科	2020-09-26	2020-10-13	3027268	刘莲玉	女	85Y	骨质疏松伴病理性骨折	腔隙性脑梗死;高血压病	好转	占恭豪	占恭豪	王佩芳
583	C05疼痛科	2020-09-26	2020-10-16	3028188	吴娥迪	女	77Y	肠道恶性肿瘤	躯干骨继发恶性肿瘤;肝继发恶性肿瘤;心房颤动;泌尿道感染;腰椎骨折;骨质疏松;下肢动脉粥样硬化;脂肪肝	未愈	吴剑	吴剑	何泽来
584	C05疼痛科	2020-09-14	2020-10-18	3028899	黄春桃	女	58Y	恶性肿瘤的维持性化疗	肺恶性肿瘤;糖尿病;胸腔积液;心包积液;下肢静脉炎和血栓性静脉炎;肺部感染;肋骨骨折;肝硬化;高血压病;肺结节	好转	陈文俊	陈文俊	何泽来
585	C05疼痛科	2020-10-13	2020-10-20	3029508	李阿娇	女	70Y	骨质疏松伴病理性骨折		好转	占恭豪	占恭豪	王佩芳
586	C05疼痛科	2020-10-10	2020-10-20	3029543	陈拓平	男	58Y	腰椎间盘突出	骨折治疗后恢复期	治愈	占恭豪	占恭豪	王佩芳	椎间盘射频消融术;神经根管松解术;腰椎间盘髓核切除术
587	C05疼痛科	2020-10-17	2020-10-24	3030744	陈秀兰	女	68Y	骨质疏松伴病理性骨折	特指手术后状态;高血压病	好转	占恭豪	占恭豪	黄茜茜
588	C05疼痛科	2020-10-25	2020-10-28	3032558	陈玉英	女	51Y	取除骨折内固定装置	特指手术后状态	其他	余可和	余可和	项光恒	盆骨内固定物取出术
589	C05疼痛科	2020-10-31	2020-11-03	3034319	陈谦弟	女	81Y	骨质疏松伴病理性骨折	特指手术后状态	好转	占恭豪	占恭豪	黄茜茜
590	C05疼痛科	2020-10-27	2020-11-05	3035088	黄永珍	女	62Y	骨质疏松	高血压病;结肠息肉;肋骨骨折	治愈	占恭豪	申帮利	申帮利
591	C05疼痛科	2020-11-14	2020-11-17	3039031	潘仙蕊	女	75Y	骨质疏松伴病理性骨折	动脉粥样硬化;脑梗死后遗症;高血压病	好转	许峰	许峰	何伶俐
592	C05疼痛科	2020-11-15	2020-11-21	3040302	杨宝香	女	80Y	骨质疏松伴病理性骨折	高血压病;2型糖尿病	好转	占恭豪	占恭豪	王佩芳
593	C05疼痛科	2020-11-14	2020-11-21	3040382	汤香爱	女	76Y	骨质疏松伴病理性骨折	动脉粥样硬化;后天性肾囊肿	好转	占恭豪	占恭豪	王佩芳
594	C05疼痛科	2020-11-21	2020-11-24	3041499	吴连香	女	75Y	骨质疏松	2型糖尿病;胸椎骨折	治愈	占恭豪	占恭豪	王佩芳
595	C05疼痛科	2020-11-24	2020-11-28	3042614	朱昌槐	男	84Y	骨质疏松伴病理性骨折	前列腺恶性肿瘤	治愈	占恭豪	占恭豪	王佩芳
596	C05疼痛科	2020-11-24	2020-12-01	3043929	麻洪香	女	72Y	骨质疏松	脊柱骨折;高血压病;冠状动脉粥样硬化性心脏病;循环系统操作后疾患	好转	占恭豪	占恭豪	占恭豪
597	C05疼痛科	2020-11-29	2020-12-06	3045526	李影	女	42Y	腰椎间盘突出	取除骨折内固定装置	治愈	许峰	许峰	何伶俐	椎间盘射频消融术;神经根管松解术
598	C05疼痛科	2020-11-27	2020-12-07	3045924	但荣波	男	29Y	第一掌骨骨折	胆囊息肉	治愈	潘骏	冯永增	金海东	掌骨骨折切开复位术
599	C05疼痛科	2020-11-25	2020-12-08	3046300	戴用妹	男	65Y	取除骨折内固定装置	2型糖尿病	其他	杨雷	杨雷	方文来	踝关节内固定物取出术
600	C05疼痛科	2020-12-08	2020-12-09	3046777	廖国兴	男	44Y	跟骨骨折	高血压病	好转	潘骏	冯永增	金海东
601	C05疼痛科	2020-12-06	2020-12-12	3047356	龚可庆	男	66Y	类风湿性多部位关节炎	骨质疏松伴病理性骨折;高血压病	好转	许峰	许峰	何伶俐
602	C05疼痛科	2020-12-07	2020-12-12	3047367	余旖旎	女	23Y	取除骨折内固定装置		其他	赵友明	赵友明	郭伟军	胫骨内固定物取出术
603	C05疼痛科	2020-12-05	2020-12-13	3047939	金勋妹	女	80Y	骨质疏松	骨质疏松伴病理性骨折;胸椎骨折;高血压病	治愈	占恭豪	申帮利	申帮利
604	C05疼痛科	2020-12-12	2020-12-16	3049272	厉兰香	女	69Y	膝关节炎	骨质疏松伴病理性骨折;髋关节炎;特指手术后状态;高脂血症	好转	占恭豪	占恭豪	占恭豪
605	C05疼痛科	2020-12-08	2020-12-19	3049728	朱玉兰	女	75Y	腰椎间盘突出	骨质疏松;胸椎骨折;高血压病;冠状动脉粥样硬化性心脏病;下肢动脉硬化闭塞症	好转	占恭豪	占恭豪	占恭豪
606	C05疼痛科	2020-12-12	2020-12-19	3049779	黄秀兰	女	81Y	腰椎间盘突出	骨质疏松;高血压病;胸椎骨折	好转	占恭豪	占恭豪	占恭豪
607	C05疼痛科	2020-12-15	2020-12-22	3050844	林碎英	女	71Y	骨质疏松伴病理性骨折	高血压病	好转	占恭豪	占恭豪	王佩芳
608	C05疼痛科	2020-12-13	2020-12-23	3051270	朱碎娒	男	80Y	脊柱压缩性骨折	骨质疏松	好转	许峰	许峰	何伶俐
609	C05疼痛科	2020-12-12	2020-12-28	3052893	潘玉芬	女	61Y	胆管恶性肿瘤	腰椎骨折;肝囊肿;后天性肾囊肿;特指手术后状态	好转	陈文俊	陈文俊	陈文俊	腰椎骨折球囊扩张成形术
610	C05疼痛科	2020-12-23	2020-12-28	3052979	周国香	女	83Y	骨质疏松	脊柱骨折;高血压病	治愈	占恭豪	占恭豪	黄茜茜
611	C05疼痛科	2020-12-27	2020-12-30	3053943	林丐连	男	62Y	胫骨骨折	高血压病	未愈	汤骏	汤骏	吴剑彬
612	C05疼痛科	2020-12-26	2020-12-31	3054091	何林桃	女	64Y	骨质疏松	胸椎骨折;特指手术后状态	治愈	占恭豪	占恭豪	黄茜茜
613	C06乳腺外科	2020-02-27	2020-02-27	2953975	李爱苏	女	62Y	股骨颈骨折		好转	王振文	水小龙	水小龙
614	C06乳腺外科	2020-07-09	2020-07-09	2996067	刘发新	男	74Y	肱骨干骨折	B细胞淋巴瘤	未愈	黄俊武	胡炜	胡炜
615	C06乳腺外科	2020-07-10	2020-07-10	2996124	林韩怡	女	13Y	肱骨外科颈骨折		未愈	张敬东	张敬东	毛诚晃
616	C06乳腺外科	2020-07-16	2020-07-17	2998606	毕思涵	女	2Y	肱骨髁上骨折		未愈	张敬东	易先宏	毛诚晃
617	C06乳腺外科	2020-07-19	2020-08-19	3009904	周太坤	男	65Y	恶性肿瘤放射治疗	病理性骨折;肺恶性肿瘤;骨继发恶性肿瘤;骨质疏松	好转	陈文俊	陈文俊	陈文俊
618	C07泌尿	2020-02-01	2020-02-05	2948125	陈映鹤	男	50Y	取除骨折内固定装置		其他	陈华	陈华	余贤斌	髌骨内固定物取出术
619	C07泌尿	2020-02-14	2020-02-29	2954293	林大寿	男	72Y	前列腺增生	肺气肿;单纯性肾囊肿;肋骨骨折;尿潴留;膀胱结石	治愈	竺海波	饶大庞	虞海峰	膀胱造口术;经尿道前列腺气化电切术[TEVAP手术]
620	C07泌尿	2020-03-03	2020-03-10	2957630	余太明	男	77Y	前列腺恶性肿瘤	腰椎退行性病变;下肢动脉粥样硬化;胸腔积液;骨质疏松;脂肪肝;胸椎骨折	好转	竺海波	竺海波	饶大庞	B超引导下前列腺穿刺
621	C07泌尿	2020-03-22	2020-03-29	2963523	杨培吾	男	65Y	髋臼骨折	颈椎间盘突出;高血压病;单纯性肾囊肿;2型糖尿病;肋骨骨折	好转	郭晓山	吴剑彬	吴剑彬
622	C07泌尿	2020-03-29	2020-04-04	2965330	余昌华	男	63Y	肾挫伤	单纯性肾囊肿;陈旧性肋骨骨折	好转	陈映鹤	杨森	杨森
623	C07泌尿	2020-04-06	2020-04-22	2970945	宋德銮	男	57Y	创伤性尿道断裂	开放性阴囊损伤;骨盆骨折	治愈	余凯远	木海琦	木海琦
624	C07泌尿	2020-03-21	2020-04-27	2972474	钱文挺	男	47Y	手术后切口感染	肾挫伤;陈旧性胫骨骨折;胫骨骨髓炎;贫血;肺挫伤;前列腺结石;胆囊息肉	好转	竺海波	饶大庞	南存金	皮肤和皮下组织切开引流术
625	C07泌尿	2020-04-25	2020-04-28	2973015	刘文桂	男	55Y	膀胱结石	膀胱造口状态;陈旧性腰椎骨折	治愈	余凯远	余凯远	木海琦	经尿道膀胱激光碎石术;经尿道膀胱颈电切术
626	C07泌尿	2020-05-03	2020-05-12	2977112	钱文挺	男	48Y	肾挫伤	胫腓骨干骨折;胫骨骨髓炎;泌尿道感染	好转	竺海波	虞海峰	虞海峰
627	C07泌尿	2020-05-24	2020-06-02	2983940	陈春桃	女	30Y	肾结石	泌尿道感染;腰椎骨折;肾积脓	治愈	何有华	何有华	木海琦	单侧肾切除术
628	C07泌尿	2020-05-31	2020-06-06	2985048	王建国	男	39Y	肾挫伤	脊髓损伤;头皮血肿;颈椎骨折;鼻骨骨折;肺大泡	治愈	竺海波	虞海峰	竺海波
629	C07泌尿	2020-06-13	2020-06-24	2990945	彭明贵	男	52Y	肾结石伴输尿管结石	肝钙化灶;骨折治疗后恢复期;单纯性肾囊肿;泌尿道感染	治愈	何有华	木海琦	木海琦	经尿道输尿管镜激光碎石术
630	C07泌尿	2020-06-23	2020-07-04	2993886	周德理	男	39Y	膀胱结石	胆囊切除术后状态;肾缺如;膀胱造口状态;特指手术后状态;胸椎骨折;截瘫;泌尿道感染	治愈	张磊	张磊	张磊	经尿道膀胱镜碎石术
631	C07泌尿	2020-07-21	2020-07-27	3001915	王永旺	男	58Y	急性前列腺炎	胃溃疡;肾结石;陈旧性腰椎骨折;慢性胃炎	好转	何有华	余凯远	余凯远
632	C07泌尿	2020-07-22	2020-08-06	3005339	林永琴	男	89Y	肾肿瘤	陈旧性肋骨骨折	治愈	何有华	何有华	何有华	肾根治性切除术
633	C07泌尿	2020-08-08	2020-08-19	3009660	温正左	男	51Y	膀胱结石	神经源性膀胱;肝内胆管结石;膀胱造口状态;胆囊切除术后状态;骨折治疗后恢复期;肝硬化;脾大;泌尿道感染;胆管扩张;乙型病毒性肝炎	治愈	竺海波	竺海波	虞海峰	经尿道膀胱取石术
634	C07泌尿	2020-08-04	2020-09-03	3014874	陈谦谦	女	69Y	腰椎骨折	胸椎骨折;骨质疏松;肾上腺囊肿;腰椎退行性病变	治愈	余凯远	木海琦	王帅彬	经皮椎动脉球囊扩张血管成形术;腹腔镜下肾上腺病损切除术
635	C07泌尿	2020-08-29	2020-09-06	3015654	吴海春	男	82Y	前列腺增生	腰椎间盘突出;心房颤动;脑梗死;胸椎骨折;尿潴留;心力衰竭;冠状动脉粥样硬化性心脏病	治愈	余凯远	张磊	王帅彬
636	C07泌尿	2020-09-06	2020-09-14	3018302	郑伯永	男	62Y	开放性多发性损伤	肋骨骨折;胸椎骨折;胸腔积液;肾上腺出血	好转	陈映鹤	陈映鹤	陈映鹤
637	C07泌尿	2020-09-05	2020-09-15	3018794	杨良生	男	62Y	膀胱结石	硬膜下血肿;陈旧性肋骨骨折;前列腺增生;小脑出血;脑积水	治愈	竺海波	竺海波	饶大庞
638	C07泌尿	2020-10-08	2020-11-08	3035958	牟加福	男	76Y	股骨颈骨折	血尿;前列腺增生;下肢静脉血栓形成	好转	竺海波	竺海波	虞海峰	下腔静脉滤器置入术;股骨骨折闭合复位术
639	C07泌尿	2020-11-13	2020-11-21	3040269	金克壮	男	85Y	尿道损伤	胸椎骨折;尿潴留	治愈	余凯远	杨森	王怡君
640	C07泌尿	2020-12-01	2020-12-13	3047911	王昌焕	男	74Y	前列腺恶性肿瘤	股骨颈骨折;下肢动脉粥样硬化;脂肪肝;后天性肾囊肿;前列腺结节;下肢静脉血栓形成	未愈	何有华	张磊	王帅彬	股骨骨折闭合复位术
641	C07泌尿	2020-12-18	2020-12-26	3052229	谭太红	男	43Y	锁骨骨折	肋骨骨折;肺挫伤;胆囊结石;脂肪肝	治愈	余可和	余可和	张月雷	锁骨骨折切开复位术
642	C08肛肠科	2019-12-29	2020-01-02	2937439	陈久洲	男	23Y	特指指骨骨折		治愈	李志杰	杨景全	杨景全	副韧带修补术;指骨骨折切开复位钢针内固定术
643	C08肛肠科	2020-03-13	2020-03-17	2959997	杨丽萍	女	54Y	腰椎骨折		好转	王向阳	王向阳	林仲可
644	C08肛肠科	2020-03-21	2020-03-25	2962354	文章英	女	55Y	取除骨折内固定装置	骨质疏松	其他	陈龙	陈龙	陈龙	股骨内固定物取出术;踝关节内固定物取出术;胫骨内固定物取出术
645	C08肛肠科	2020-03-23	2020-03-26	2962890	张义智	男	60Y	取除骨折内固定装置		其他	翁益民	翁益民	翁益民	跟骨内固定物取出术
646	C08肛肠科	2020-03-22	2020-03-28	2963147	高瑞云	男	62Y	取除骨折内固定装置		其他	杨雷	杨雷	项光恒	锁骨内固定物取出术
647	C08肛肠科	2020-03-22	2020-03-30	2963882	杨彩萍	女	62Y	股骨颈骨折		治愈	郭晓山	吴剑彬	吴剑彬	股骨骨折闭合复位螺钉内固定术
648	C08肛肠科	2020-03-23	2020-03-31	2964201	陈金兰	女	59Y	肱骨外髁骨折	脂肪肝	治愈	陈龙	陈龙	陈龙	肩袖修补术;肱骨骨折切开复位钢板内固定术
649	C08肛肠科	2020-03-28	2020-04-06	2965903	刘雪	女	41Y	双踝骨折		治愈	张宇	陈成旺	陈成旺	踝关节骨折切开复位钢板内固定术
650	C08肛肠科	2020-03-28	2020-04-07	2966219	林嵩	男	60Y	肩袖损伤	陈旧性肋骨骨折;锁骨骨折;股骨头无菌性坏死	治愈	胡月正	胡月正	林一木	肩袖修补术;肩关节镜检查
651	C08肛肠科	2020-05-07	2020-05-26	2981901	江弟志	男	53Y	肛门损伤	尿道损伤;肾结石;指关节脱位;尾骨骨折;尿道瘘;肺大泡;特指手术后状态	治愈	刘长宝	郑晨果	郑晨果
652	C08肛肠科	2020-05-27	2020-06-12	2986893	池庆鑫	男	29Y	股骨特指部位骨折		治愈	黄俊武	黄俊武	胡炜	股骨骨折切开复位钢针内固定术
653	C08肛肠科	2020-06-20	2020-06-23	2990530	王才华	男	52Y	取除骨折内固定装置		其他	赵友明	赵友明	郭伟军	锁骨内固定物取出术
654	C08肛肠科	2020-10-23	2020-10-31	3033246	顾明明	男	23Y	桡骨骨折		治愈	潘骏	冯永增	冯永增	桡骨骨折切开复位钢板内固定术
655	C08肛肠科	2020-10-30	2020-11-07	3035575	郑晓鸿	女	35Y	锁骨骨折	肾结石;妊娠、分娩和产褥期并发症个人史;肝血管瘤;肝囊肿	治愈	余可和	余可和	项光恒	锁骨骨折切开复位钢针内固定术
656	C08肛肠科	2020-11-18	2020-11-21	3040309	吴桂英	女	78Y	肱骨髁间骨折	脑血管病后遗症;高血压病;肌腱和肌肉损伤;帕金森病;颈椎关节强硬	好转	石成弟	石成弟	216191
657	C08肛肠科	2020-11-25	2020-12-02	3044375	汪天胜	男	54Y	取除骨折内固定装置		其他	洪建军	余洋	余洋	髌骨内固定物取出术
658	C08肛肠科	2020-11-27	2020-12-09	3046568	章柳凤	女	86Y	股骨粗隆间骨折	高血压病	治愈	陈龙	陈龙	应晓洲	股骨骨折切开复位钢针内固定术
659	C08肛肠科	2020-12-21	2020-12-28	3052909	蔡振光	男	25Y	取除骨折内固定装置	创伤后伤口感染	其他	余可和	余可和	张月雷	皮肤和皮下组织非切除性清创;胫骨内固定物取出术
660	C09肛肠科	2020-01-06	2020-01-09	2939449	林铭豪	男	17Y	取除骨折内固定装置		其他	黄俊武	黄俊武	李振兴	桡骨内固定物取出术
661	C09肛肠科	2020-01-05	2020-01-11	2939741	钱宜宽	男	55Y	取除骨折内固定装置	肺部阴影;前列腺结石	其他	洪建军	洪建军	胡炜	腓骨内固定物取出术;踝关节内固定物取出术;跖骨内固定物取出术
662	C09肛肠科	2020-01-08	2020-01-13	2940493	习思平	男	30Y	跟骨骨折		好转	陈龙	陈龙	金海东
663	C09肛肠科	2020-01-27	2020-01-30	2946086	林翘楚	男	18Y	取除骨折内固定装置		其他	洪建军	洪建军	胡炜	跟骨内固定物取出术
664	C09肛肠科	2020-03-22	2020-03-26	2962779	胡臣来	男	54Y	肩胛骨骨折		好转	郭晓山	吴剑彬	吴剑彬
665	C09肛肠科	2020-06-15	2020-06-27	2991736	叶海燕	女	46Y	髌骨骨折	胆囊结石	治愈	陈龙	陈龙	应晓洲	髌骨骨折切开复位螺钉内固定术;髌韧带缝合术
666	C09肛肠科	2020-06-27	2020-06-30	2993070	周俊浩	男	19Y	特指掌骨骨折		治愈	陈龙	陈龙	应晓洲	掌骨骨折切开复位钢针内固定术
667	C09肛肠科	2020-07-16	2020-07-18	2998830	陈佳豪	男	6M	肱骨骨折		好转	张敬东	易先宏	王伟
668	C09肛肠科	2020-07-16	2020-08-01	3003415	林庆生	男	63Y	肱骨骨折	脂肪肝;肱骨良性肿瘤;肩袖损伤	好转	杨雷	陈龙	陈龙
669	C09肛肠科	2020-08-07	2020-08-08	3006112	邵凤香	女	78Y	外踝骨折	老年性痴呆;心脏病	未愈	杨雷	陈龙	陈龙
670	C09肛肠科	2020-08-12	2020-08-16	3008913	魏元福	男	29Y	取除骨折内固定装置	锁骨骨折	其他	洪建军	余洋	余洋	锁骨内固定物取出术
671	C09肛肠科	2020-08-07	2020-08-19	3009751	朱冬兰	女	83Y	股骨干骨折	特指手术后状态;下肢动脉粥样硬化;胆囊结石;高血压病;后天性肾囊肿;肾结石;多发性肋骨骨折;股骨粗隆间骨折;肝囊肿;肺炎	治愈	陈龙	陈龙	陈龙	股骨内固定物取出术;股骨骨折切开复位钢板内固定术
672	C09肛肠科	2020-08-13	2020-08-24	3011374	邓显光	男	48Y	尺骨桡骨远端骨折		治愈	陈龙	陈龙	陈龙	尺骨骨折切开复位钢板内固定术;桡骨骨折切开复位钢板内固定术
673	C09肛肠科	2020-10-08	2020-10-21	3029892	徐梅弟	女	81Y	直肠脱垂	陈旧性肋骨骨折;骨质疏松;食管裂孔疝;高血压性心脏病;冠状动脉粥样硬化;特指手术后状态	治愈	刘长宝	刘长宝	黄崇杰	经肛门直肠病损切除术
674	C09肛肠科	2020-10-24	2020-10-29	3032788	叶志德	男	34Y	踝骨闭合性骨折		治愈	潘骏	冯永增	冯永增	踝关节骨折切开复位钢板内固定术
675	C09肛肠科	2020-10-28	2020-11-07	3035479	汪瑜莹	女	14Y	跖骨骨折	肝血管瘤	治愈	余可和	余可和	项光恒	跖骨骨折切开复位钢板内固定术
676	C09肛肠科	2020-11-21	2020-11-25	3041801	叶翠平	女	46Y	取除骨折内固定装置	肱骨骨折	其他	赵友明	赵友明	赵友明	肱骨内固定物取出术
677	C09肛肠科	2020-11-21	2020-11-25	3041806	林魁幸	男	43Y	取除骨折内固定装置	脂肪肝;肱骨骨折	其他	赵友明	赵友明	赵友明	肱骨内固定物取出术
678	C09肛肠科	2020-11-23	2020-11-28	3042764	潘海燕	女	38Y	取除骨折内固定装置	房性早搏;肱骨骨折;脂肪肝	其他	余可和	余可和	项光恒	肱骨内固定物取出术
679	C09肛肠科	2020-11-20	2020-11-30	3043467	沈金妹	女	58Y	股骨颈骨折	肾结石;肝血管瘤	治愈	陈龙	陈龙	应晓洲	股骨骨折闭合复位钢针内固定术
680	C09肛肠科	2020-11-25	2020-11-30	3043645	林乃柱	男	24Y	取除骨折内固定装置	原发性甲状旁腺功能亢进症;内踝骨折;高钙血症	其他	余可和	余可和	项光恒	踝关节内固定物取出术
681	C09肛肠科	2020-11-29	2020-12-01	3043964	张瑞国	男	65Y	骨折治疗后随诊检查	脂肪肝;后天性肾囊肿;肝囊肿;下肢动脉粥样硬化;老年性脑萎缩;腔隙性脑梗死;陈旧性肺结核;胸锁关节脱位;锁骨骨折	其他	余可和	余可和	张月雷
682	C09肛肠科	2020-11-25	2020-12-02	3044221	洪娟妹	女	64Y	取除骨折内固定装置	跟骨骨折	其他	洪建军	余洋	余洋	跟骨内固定物取出术
683	C09肛肠科	2020-11-30	2020-12-03	3044671	林秀凤	女	50Y	取除骨折内固定装置	胫骨骨折	其他	洪建军	余洋	余洋	胫骨内固定物取出术
684	C09肛肠科	2020-12-01	2020-12-05	3045060	黄永和	男	38Y	取除骨折内固定装置	肱骨上端骨折	其他	洪建军	余洋	余洋	肱骨内固定物取出术
685	C09肛肠科	2020-11-29	2020-12-05	3045097	叶琪云	男	27Y	取除骨折内固定装置	尺骨骨折	其他	杨雷	杨雷	方文来	尺骨内固定物取出术
686	C09肛肠科	2020-11-29	2020-12-05	3045121	鲍存栋	男	30Y	取除骨折内固定装置	股骨骨折	其他	杨雷	杨雷	方文来	股骨内固定物取出术
687	C09肛肠科	2020-12-01	2020-12-06	3045502	曹裕良	男	65Y	取除骨折内固定装置	胫骨骨折;软组织内残留异物	其他	洪建军	余洋	余洋	胫骨内固定物取出术;下肢异物去除
688	C09肛肠科	2020-12-02	2020-12-07	3045911	温作芳	男	49Y	取除骨折内固定装置	肩锁关节脱位	其他	陈华	陈华	216123	肩锁关节内固定物取出术
689	C09肛肠科	2020-12-02	2020-12-14	3048166	周开郎	男	19Y	锁骨骨折		治愈	余可和	余可和	张月雷	锁骨骨折切开复位钢板内固定术
690	C09肛肠科	2020-12-18	2020-12-20	3050370	戴其妹	女	54Y	外踝骨折	肺纤维化	好转	余可和	余可和	张月雷
691	C09肛肠科	2020-12-09	2020-12-22	3051174	虞国江	男	46Y	胫腓骨干骨折	脂肪肝	治愈	余可和	余可和	张月雷	胫骨骨折切开复位钢板内固定术
692	C10感染内科	2019-11-30	2020-01-07	2938726	陈定旺	男	88Y	间质性肺病	肾功能异常;下肢动脉粥样硬化;十二指肠溃疡;肺部感染;高血压病;腔隙性脑梗死;股骨粗隆间骨折	未愈	诸葛璐	郑毅	林秀珍	股骨骨折闭合复位术
693	C10感染内科	2019-12-05	2020-01-12	2940074	林笑秋	女	68Y	肺部感染	心律失常;早搏;心房颤动;跟骨骨折;外踝骨折;脊椎关节强硬;骨盆骨折;心动过速;膝关节僵硬;泌尿道感染;胫骨骨折	好转	林巍	林巍	林秀珍
694	C10感染内科	2020-02-06	2020-02-17	2950600	胡永娟	女	90Y	脓毒血症	动脉粥样硬化;2型糖尿病;骨折治疗后恢复期;高血压病	治愈	潘陈为	李杰	李杰
695	C10感染内科	2020-02-01	2020-02-25	2953122	潘国新	男	35Y	脓毒血症	下肢深静脉血栓性静脉炎;拇指骨折;截瘫;特指手术后状态	治愈	潘陈为	郑毅	李杰	股静脉穿刺术;下腔静脉滤器置入术
696	C10感染内科	2020-02-14	2020-03-04	2955677	贾溢渭	男	72Y	泌尿道感染	骨折治疗后恢复期;肱骨外髁骨折;头皮挫伤;中毒性肝炎;脑挫伤;感染性休克;创伤性蛛网膜下腔出血	治愈	林巍	周光耀	林秀珍
697	C10感染内科	2020-03-25	2020-03-29	2963478	杨永钦	男	47Y	乙型病毒性肝炎	肝硬化;骨折治疗后随诊检查;脾大	好转	潘陈为	郑毅	郑毅
698	C10感染内科	2020-03-25	2020-03-30	2963913	陈美华	女	56Y	社区获得性肺炎，非重症	骨折治疗后恢复期;子宫平滑肌瘤;胆囊结石;特指手术后状态	治愈	周光耀	林秀珍	林秀珍
699	C10感染内科	2020-03-29	2020-04-05	2965395	周晓华	女	51Y	泌尿道感染	主动脉瓣硬化;甲状腺机能减退症;梅毒;陈旧性肋骨骨折;食管肿物;脓毒血症	好转	周光耀	林秀珍	林秀珍
700	C10感染内科	2020-03-26	2020-05-03	2974288	方升鹿	男	92Y	肺部感染	动脉粥样硬化;高血压病;真性红细胞增多症;心功能不全;高血压性心脏病;股骨颈骨折	治愈	潘陈为	郑毅	李杰	人工股骨头置换术
701	C10感染内科	2020-04-25	2020-05-03	2974294	李鲜	女	22Y	病毒性脑膜炎	动脉痉挛;陈旧性肱骨骨折	治愈	诸葛璐	周光耀	林秀珍
702	C10感染内科	2020-05-30	2020-06-10	2986591	陈尚志	男	57Y	肝硬化失代偿期	肝囊肿;胸腔积液;胆囊切除术后状态;门静脉高压;肋骨骨折;腹水;脾大;胆总管扩张;胆道感染;肝胆管结石	未愈	潘陈为	郑毅	李杰
703	C10感染内科	2020-06-29	2020-07-07	2995301	周玉花	女	85Y	病毒感染	腰椎退行性病变;下肢动脉粥样硬化;骨质疏松;高血压病;胸椎骨折;无症状性菌尿	好转	诸葛璐	金玲湘	林秀珍
704	C10感染内科	2020-07-12	2020-07-21	3000077	俞榜	男	76Y	感染性发热	颈动脉硬化;胆囊结石;高血压病;桡骨下端骨折;腔隙性脑梗死;横纹肌溶解症;脂肪肝	治愈	周光耀	林秀珍	林秀珍
705	C10感染内科	2020-08-03	2020-08-11	3007101	徐玉兰	女	90Y	肺部感染	腹主动脉扩张;髂动脉闭塞性粥样硬化;腹主动脉粥样硬化;心脏瓣膜病;老年性脑萎缩;腔隙性脑梗死;陈旧性肋骨骨折;高血压病	好转	周光耀	方佩佩2	黄珊珊
706	C10感染内科	2020-08-01	2020-08-17	3008071	俞榜	男	76Y	感染性发热	颈动脉硬化;胆囊结石;高血压病;脂肪肝;肺特指疾患;腔隙性脑梗死;桡骨下端骨折	治愈	金玲湘	方佩佩2	黄珊珊
707	C10感染内科	2020-08-15	2020-08-22	3010473	诸柏连	男	64Y	感染性发热	特指手术后状态;乙型肝炎后肝硬化失代偿期;胸椎骨折	好转	诸葛璐	金玲湘	郑毅
708	C10感染内科	2020-08-25	2020-09-12	3017552	陈志成	男	72Y	脓毒血症	血液透析;脑血管病后遗症;心房颤动;高血压病;慢性肾脏病5期;2型糖尿病;慢性乙型病毒性肝炎;腰椎骨折;骨质疏松;中毒性肝炎;中毒性脑病	治愈	林巍	周光耀	黄珊珊
709	C10感染内科	2020-09-21	2020-09-29	3022886	陈寿鹤	男	63Y	脓毒血症	高血压病;后天性肾囊肿;肾结石;2型糖尿病;指骨骨折;前列腺增生;脂肪肝;高脂血症	治愈	诸葛璐	方佩佩2	李杰
710	C10感染内科	2020-10-06	2020-10-19	3029288	赵克荣	男	81Y	脓毒血症	帕金森病;腰椎骨折;肾结石;前列腺增生;颈动脉硬化;下肢动脉粥样硬化	好转	诸葛璐	方佩佩2	李杰
711	C10感染内科	2020-09-01	2020-10-21	3029783	吴国光	男	86Y	脓毒血症	口腔感染;肺部感染;肾功能异常;中度贫血;下肢动脉粥样硬化;股骨颈骨折;高血压病;颈动脉硬化;腔隙性脑梗死	好转	诸葛璐	方佩佩2	李杰
712	C10感染内科	2020-11-07	2020-11-15	3038267	徐定虎	男	93Y	肺部感染	尿潴留;前列腺结石;前列腺增生;肝囊肿;下肢静脉血栓形成;阵发性室上性心动过速;高血压性心脏病;动脉粥样硬化;单纯性肾囊肿;胫前动脉狭窄;心功能Ⅲ级;胸椎骨折	好转	林巍	周光耀	林秀珍
713	C10感染内科	2020-11-17	2020-11-24	3041578	毛定民	男	51Y	脂肪肝	多发性肋骨骨折;胸腔积液;甲状腺结节;原发性甲状腺功能减退症;肝囊肿;后天性肾囊肿	好转	诸葛璐	方佩佩2	李杰
714	C11肾内科	2020-02-14	2020-03-16	2959699	朱延超	男	44Y	急性肾衰竭	高血压病;多发性肋骨骨折;横纹肌溶解症;下肢神经损伤;酒精中毒;肝纤维化;肺部感染;气胸;脂肪肝	好转	毛朝鸣	郑育	陈琰
715	C11肾内科	2020-03-06	2020-03-28	2963283	王培旭	男	72Y	高血压性肾病	下肢动脉粥样硬化;甲状腺结节;下肢溃疡;陈旧性肋骨骨折;腹膜透析;心房颤动;腹膜透析后腹膜炎	好转	王红	张益前	黄文
716	C11肾内科	2020-04-15	2020-04-19	2969824	董友金	男	57Y	骨质疏松	手舟状骨骨折;桡骨下端骨折;膝关节病;后天性肾囊肿;手挫伤;前列腺结石;前列腺增生;胆囊息肉	好转	张益前	王红	黄文
717	C11肾内科	2020-05-26	2020-06-02	2984122	徐贤良	男	56Y	2型糖尿病性肾病	颈动脉硬化;特发性痛风;单纯性肾囊肿;慢性肾脏病5期;2型糖尿病;2型糖尿病性视网膜病变;胫骨骨折	好转	毛朝鸣	李占园	陈琰
718	C11肾内科	2020-06-14	2020-06-24	2991119	王美英	女	73Y	导管相关性感染	脑梗死后遗症;高血压病;陈旧性腰椎骨折;慢性肾脏病5期;甲状腺机能减退症;骨质疏松;高血压性肾病;痛风	好转	王红	张益前	潘殊方
719	C11肾内科	2020-06-24	2020-07-01	2993338	徐贤良	男	56Y	2型糖尿病性肾病	痛风;2型糖尿病性视网膜病变;胫骨骨折;颈动脉硬化	好转	李占园	郑育	陈琰	腹膜透析
720	C11肾内科	2020-06-27	2020-07-07	2995280	陈海元	男	63Y	肾功能损害引起痛风	腘窝囊肿;肋骨骨折;慢性胃炎;痛风;胃息肉;动脉粥样硬化;下肢动脉粥样硬化;腹主动脉粥样硬化;高血压病;单纯性肾囊肿;肾结石;慢性肾衰竭;腔隙性脑梗死;肺结节病	好转	赵艳玲	陈辉乐	潘敏
721	C11肾内科	2020-06-23	2020-07-07	2995293	陈阿吾	男	69Y	2型糖尿病性肾病	髂总动脉粥样硬化;梅毒;高血压病;高血压性视网膜病变;间位结肠;单纯性肾囊肿;慢性肾衰竭;2型糖尿病;2型糖尿病性视网膜病变;肋骨骨折;前列腺增生;肺部感染;肺水肿;心力衰竭;贫血;腹主动脉粥样硬化	好转	赵艳玲	陈辉乐	潘敏
722	C11肾内科	2020-06-14	2020-07-13	2997364	张仙菊	女	82Y	2型糖尿病性肾病	心功能不全;胸腔积液;肺部感染;反流性食管炎;慢性胃炎;下肢皮肤感染;骨质疏松;心动过速;股骨粗隆间骨折;腹膜透析;2型糖尿病性视网膜病变;2型糖尿病足病;慢性肾脏病5期;骨折治疗后随诊检查;高血压病;营养不良;下肢动脉粥样硬化	好转	王红	张益前	黄文
723	C11肾内科	2020-07-08	2020-07-16	2998431	颜日全	男	43Y	慢性肾小球肾炎	肺大泡;骨折治疗后恢复期;乙型肝炎相关性肾炎	好转	赵艳玲	陈辉乐	潘敏
724	C11肾内科	2020-07-11	2020-07-21	3000118	许一状	男	49Y	肾衰竭	脑梗死后遗症;心房颤动;骨折治疗后恢复期;肾结石;慢性乙型病毒性肝炎;急性上颌窦炎;风湿性心脏病;痛风	好转	赵艳玲	陈辉乐	潘敏
725	C11肾内科	2020-07-21	2020-07-25	3001321	洪钻祥	男	42Y	强直性脊柱炎	颈动脉硬化;锁骨下动脉粥样硬化;陈旧性桡骨骨折	好转	王红	王红	黄文
726	C11肾内科	2020-07-06	2020-07-29	3002824	徐贤良	男	56Y	2型糖尿病性肾病	颈动脉硬化;特发性痛风;腹膜透析中腹腔感染;单纯性肾囊肿;慢性肾脏病5期;2型糖尿病;2型糖尿病性视网膜病变;胫骨骨折	好转	毛朝鸣	李占园	陈琰
727	C11肾内科	2020-08-09	2020-08-11	3007160	林良明	男	61Y	高血压性肾病	颈动脉硬化;下肢动脉粥样硬化;高血压病;骨折治疗后随诊检查;慢性肾脏病3期;2型糖尿病;肾动脉狭窄;高脂血症	好转	赵艳玲	赵艳玲	潘敏
728	C11肾内科	2020-08-05	2020-08-24	3011336	朱明兰	女	64Y	2型糖尿病性肾病	特指手术后状态;胆囊结石;老年性脑萎缩;2型糖尿病;单纯性甲状腺肿;陈旧性肋骨骨折;癫痫;贫血;肺结节病	好转	赵艳玲	潘敏	潘敏	为肾透析的动静脉造瘘术
729	C11肾内科	2020-08-16	2020-08-24	3011532	蒋永兰	女	82Y	肺部感染	稳定型心绞痛;高血压病;冠状动脉介入治疗后随诊检查;慢性肾脏病5期;股骨颈骨折;呼吸衰竭;心力衰竭;冠状动脉粥样硬化性心脏病;高血压性肾病;高血压性心脏病	好转	赵艳玲	潘敏	潘敏
730	C11肾内科	2020-09-09	2020-09-13	3017886	国方崇	男	53Y	隐匿性肾小球肾炎	高血压病;骨折治疗后恢复期;后天性肾囊肿;脂肪肝	治愈	李占园	叶菡洋	潘敏
731	C11肾内科	2020-09-12	2020-09-19	3019802	程夫元	男	76Y	肾衰竭	颈动脉硬化;淀粉样变皮肤损害;高血压病;心动过缓;肾结石;2型糖尿病;肺结节病;陈旧性肋骨骨折;主动脉钙化;痛风	好转	郑育	郑淑蓓	黄文
732	C11肾内科	2020-08-22	2020-09-20	3020056	池金波	男	85Y	慢性肾衰竭	胆囊结石;高血压病;恶性肿瘤手术后随诊检查;慢性肾脏病5期;2型糖尿病;腹膜透析;肋骨骨折;蜂窝织炎;肺部感染;冠状动脉粥样硬化性心脏病	好转	郑育	郑淑蓓	黄文	皮肤和皮下组织切开引流术
733	C11肾内科	2020-09-19	2020-09-21	3020528	潘秀兰	女	65Y	多肌炎	恶性肿瘤术后恢复期;间质性肺病;胸椎骨折;骨质疏松	未愈	王红	王红	潘殊方
734	C11肾内科	2020-09-20	2020-09-23	3021313	朱明兰	女	64Y	特指糖尿病伴肾并发症	肺结节;2型糖尿病性视网膜病变;慢性肾脏病5期;双眼白内障;陈旧性肋骨骨折;贫血;癫痫;单纯性甲状腺肿;胆囊结石;骨折治疗后恢复期;老年性脑萎缩	好转	李占园	赵艳玲	赵艳玲
735	C11肾内科	2020-09-26	2020-09-30	3023586	应欲汤	男	60Y	骨质疏松	腰椎退行性病变;胆囊结石;肾结石;陈旧性骨盆骨折;高血压病;2型糖尿病;胃溃疡;十二指肠息肉;直肠溃疡;前列腺增生;陈旧性胫骨骨折	好转	毛朝鸣	王红	张益前
736	C11肾内科	2020-09-20	2020-10-02	3024397	池金波	男	85Y	心脏停搏复苏成功	2型糖尿病;皮肤和皮下组织局部感染;肺部感染;冠状动脉粥样硬化性心脏病;高血压病;恶性肿瘤手术后随诊检查;肋骨骨折;带状疱疹	好转	郑育	郑育	黄文	为肾透析的动静脉造瘘术
737	C11肾内科	2020-09-30	2020-10-08	3025721	金秀兰	女	81Y	慢性肾衰竭	2型糖尿病;2型糖尿病性肾病;颈动脉硬化;单眼白内障;高血压病;脑血管病后遗症;骨折治疗后恢复期	好转	周志宏	戴彩香	戴彩香
738	C11肾内科	2020-09-12	2020-10-14	3027664	王美英	女	73Y	肺部感染	脑血管病后遗症;甲状腺机能减退症;痛风;骨质疏松;骨折治疗后恢复期;高血压病;高血压性肾病	好转	毛朝鸣	张益前	潘殊方
739	C11肾内科	2020-10-05	2020-10-14	3027757	陈乃初	男	63Y	急性肾衰竭	痛风;慢性萎缩性胃炎;十二指肠溃疡;骨折治疗后随诊检查;泪道狭窄	好转	李占园	叶菡洋	潘敏
740	C11肾内科	2020-10-17	2020-10-19	3029323	潘秀兰	女	65Y	多肌炎	恶性肿瘤手术后随诊检查;间质性肺病;胸椎骨折;骨质疏松	好转	毛朝鸣	王红	戴彩香
741	C11肾内科	2020-10-13	2020-10-21	3030190	陈伦平	女	50Y	类风湿性关节炎	肾结石;高脂血症;陈旧性耻骨骨折;骨质疏松	好转	毛朝鸣	王红	戴彩香
742	C11肾内科	2020-10-29	2020-11-02	3034062	朱明兰	女	65Y	特指糖尿病伴肾并发症	胆囊结石;老年性脑萎缩;特指糖尿病伴眼并发症;轻度贫血;双眼白内障;肋骨骨折;癫痫;单纯性甲状腺肿	好转	李占园	叶菡洋	潘敏
743	C11肾内科	2020-11-03	2020-11-07	3035852	洪钻祥	男	42Y	强直性脊柱炎	颈动脉硬化;锁骨下动脉粥样硬化;骨折治疗后恢复期	好转	毛朝鸣	王红	潘殊方
744	C11肾内科	2020-12-06	2020-12-09	3046797	王培旭	男	73Y	高血压性肾病	高血压病;腹膜透析;心房颤动;下肢动脉粥样硬化;肋骨骨折;甲状腺结节;甲状腺良性肿瘤;肝囊肿	好转	李占园	叶菡洋	潘敏
745	C11肾内科	2020-12-20	2020-12-21	3050806	潘秀兰	女	65Y	多肌炎	恶性肿瘤手术后随诊检查;胸椎骨折;骨质疏松;间质性肺病	好转	李占园	叶菡洋	潘敏
746	C11肾内科	2020-11-28	2020-12-29	3053346	李加明	男	51Y	腹壁脓肿	腹膜透析后腹膜炎;2型糖尿病性肾病;2型糖尿病性视网膜病变;2型糖尿病性周围神经病;冠状动脉粥样硬化性心脏病;高血压病;肾结石;后天性肾囊肿;特指手术后状态;陈旧性腓骨骨折;前列腺结石;颈动脉硬化;肝钙化灶	治愈	李占园	叶菡洋	潘敏	腹腔脓肿切开引流术
747	C11肾内科	2020-11-28	2020-12-30	3053812	陈泽霖	男	78Y	2型糖尿病性肾病	冠状动脉粥样硬化性心脏病;肺部感染;高血压病;肋骨骨折;痛风;颈动脉硬化;肺结节病;2型糖尿病;腹膜透析;前列腺增生;后天性肾囊肿	好转	毛朝鸣	张益前	216133
748	D06(ICU)	2020-01-10	2020-01-12	2940404	陈温样	女	15Y	颅内损伤伴长时间昏迷	颅骨骨折;骨盆骨折;创伤性硬膜下出血;创伤性脑疝	死亡	庄荣	陈如杰	陈如杰	脑内血肿清除术
749	D06(ICU)	2020-01-22	2020-02-05	2948109	黄玉玲	女	83Y	股骨粗隆间骨折	糖尿病;肺炎;胸腔积液;急性肾衰竭;高血压病;甲状腺肿	好转	庄荣	郭蕾	郭蕾	股骨骨折切开复位钢板内固定术
750	D06(ICU)	2020-02-05	2020-02-11	2949684	金送得	男	62Y	创伤性蛛网膜下腔出血	脑挫伤;骶骨骨折;腰椎骨折;肾衰竭;头皮血肿;脑疝;后天性肾囊肿;多发性脑出血;脂肪肝	未愈	程碧环	吴海亚	吴海亚	脑内血肿清除术
751	D06(ICU)	2020-02-04	2020-02-13	2950117	黄淑金	女	92Y	冠状动脉粥样硬化性心脏病	胸椎退行性病变;下肢动脉粥样硬化;高血压病;2型糖尿病;肺部感染;股骨粗隆间骨折;腰椎骨折;呼吸衰竭;肾衰竭;2型糖尿病性高渗性昏迷	未愈	程碧环	戴凌燕	戴凌燕
752	D06(ICU)	2020-01-19	2020-02-16	2947901	陈和兴	男	68Y	颈部脊髓损伤	高血压病;缺氧缺血性脑病;麻痹[瘫痪]综合征;癫痫;眶骨骨折;呼吸衰竭;脂肪肝;肾结石	好转	庄荣	庄荣	陈建时	后入路颈椎融合术
753	D06(ICU)	2020-03-03	2020-03-03	2956015	王宣明	男	74Y	失血性休克	呼吸心跳骤停;股骨骨折;脂肪栓塞综合征;多发性肋骨骨折	未愈	庄荣	郭献阳	郭献阳
754	D06(ICU)	2020-01-18	2020-03-04	2955809	陈少纳	女	66Y	肺部感染	特指手术后状态;脂肪肝;周围神经病;乙型病毒性肝炎;泌尿道感染;直肠恶性肿瘤个人史;脑干梗死;陈旧性肋骨骨折;脑出血后遗症	好转	程碧环	吴海亚	吴海亚
755	D06(ICU)	2020-02-27	2020-03-09	2957506	杨松波	男	76Y	股骨粗隆间骨折	呼吸心跳骤停;高血压病;心力衰竭;休克;肾衰竭;2型糖尿病	好转	程碧环	程碧环	胡建坚	跟骨骨折闭合复位术
756	D06(ICU)	2020-03-03	2020-03-14	2959109	阮秀兰	女	61Y	股骨颈骨折	骨质疏松;支气管扩张;呼吸衰竭;慢性阻塞性肺病伴急性加重;慢性支气管炎	好转	庄荣	庄荣	谢媚媚	全髋关节置换术
757	D06(ICU)	2020-03-10	2020-03-17	2960041	李平	男	43Y	创伤性硬膜外出血	尺骨下端骨折;面部软组织挫伤;桡骨下端骨折;弥漫性轴索损伤;创伤性蛛网膜下腔出血;脑挫伤;多发性颅骨骨折;肺部感染;多发性面骨骨折	未愈	庄荣	庄荣	陈建时	脑内血肿清除术
758	D06(ICU)	2020-03-17	2020-03-18	2960455	林孝疆	男	52Y	创伤性硬膜外出血	脑挫伤;肩胛骨骨折;肺部感染;支气管扩张;脑疝;多发性腰椎骨折;创伤性硬膜下出血;肺挫伤	未愈	庄荣	郭献阳	郭献阳	脑内血肿清除术
759	D06(ICU)	2020-03-29	2020-03-30	2964461	徐华妹	女	75Y	脑疝	单纯性肾囊肿;肺部感染;肝囊肿;颅底骨折;鼻骨骨折;颧骨骨折;眶骨骨折;硬膜下出血;肺结节病;脑挫伤	未愈	庄荣	庄荣	谢媚媚	颅骨切除减压术;开颅探查术
760	D06(ICU)	2020-03-26	2020-04-06	2966113	朱柏成	女	40Y	创伤性脑疝	心脏骤停;特指-般症状和体征;创伤性硬膜下出血;颅底骨折;创伤性蛛网膜下腔出血;脑挫伤;脑干损伤	死亡	庄荣	庄荣	张文武	开颅探查术
761	D06(ICU)	2020-04-02	2020-04-11	2967574	滕恩德	男	61Y	创伤性脑疝	中枢性呼吸衰竭;急性肾衰竭;肺挫伤;脑挫伤;颅底骨折	死亡	庄荣	庄荣	谢媚媚	颅骨切除减压术
762	D06(ICU)	2020-03-22	2020-04-14	2968959	张成桂	男	73Y	间质性肺病	前列腺增生;腰椎骨折;结肠息肉;后天性肾囊肿;特指手术后状态;神经官能症;气胸;肺部感染	未愈	庄荣	郭献阳	郭献阳
763	D06(ICU)	2020-04-08	2020-04-17	2969679	陈美花	女	60Y	创伤性蛛网膜下腔出血	创伤性硬膜下出血;顶骨骨折;额骨骨折;肺部感染;脑疝	死亡				颅骨切除减压术
764	D06(ICU)	2020-04-21	2020-05-12	2977318	盛小珍	女	48Y	骨盆骨折	腰椎骨折;腹水;胆囊结石;失血性休克;后天性肾囊肿;创伤性胸腔积液;多发性肋骨骨折;多发性胸椎骨折;多处挫伤;肺挫伤;创伤性气胸;创伤性蛛网膜下腔出血;腕关节脱位	治愈	庄荣	林孟相	张文武	骶髂关节固定术;骨盆骨折切开复位钢板内固定术
765	D06(ICU)	2020-05-12	2020-05-12	2977652	史庆生	男	53Y	多发性骨盆骨折	创伤性膀胱破裂;开放性阴囊损伤;失血性休克;多处挫伤;创伤性尿道断裂	死亡	庄荣	陈建时	陈建时	髂内动脉栓塞术
766	D06(ICU)	2020-05-25	2020-06-16	2988486	蔡秀华	女	89Y	股骨粗隆间骨折	下肢动脉粥样硬化;高血压病;后天性肾囊肿;肝囊肿;肺部感染;胸腔积液;心功能不全	治愈	庄荣	陈建时	陈建时	股骨骨折闭合复位髓内针内固定术
767	D06(ICU)	2020-06-22	2020-06-24	2991170	林爱英	女	55Y	大脑撕裂伤	颞骨骨折;乙型病毒性肝炎;肺挫伤;头皮血肿;特指颅骨和面骨骨折;创伤性硬膜外出血;创伤性急性硬膜下出血	好转	庄荣	谢媚媚	谢媚媚	脑膜切开伴硬脑膜下腔血肿清除术;硬脑膜外血肿清除术
768	D06(ICU)	2020-06-14	2020-06-27	2992333	梁祚聪	男	52Y	眼球破裂	多发性面骨骨折;肾结石;多发性肋骨骨折;多处挫伤;颅底骨折;脂肪肝;肺部感染;胸腔积液;心房扑动	好转	庄荣	陈建时	陈建时	眼球裂伤缝合;颧骨骨折切开复位内固定术;眶骨骨折切开复位术;上颌骨骨折切开复位固定术
769	D06(ICU)	2020-06-07	2020-06-28	2992338	黄雪兰	女	81Y	髋关节和在大腿水平多发性肌肉和肌腱损伤	开放性胫骨上端骨折;开放性小腿多处损伤;帕金森病;多发性脑梗死;腔隙性脑梗死;重症肺炎;肾萎缩;肾衰竭;开放性多发性髋和大腿损伤;下肢动脉粥样硬化;胆囊结石	好转	庄荣	谢媚媚	谢媚媚	大腿截断术;皮肤缝合术;皮肤和皮下组织切开引流术;皮肤和皮下坏死组织切除清创术
770	D06(ICU)	2020-06-29	2020-07-01	2993867	陈武	男	45Y	创伤性肠破裂	创伤性休克;创伤性腹膜后血肿;骨盆骨折;髂骨骨折;骶骨骨折;腰椎骨折;感染性休克;腹腔感染;创伤性膝切断;闭合性胫骨平台骨折;肠系膜裂伤;感染性多器官功能障碍综合征;髋臼骨折	未愈	龚裕强	陈欣欣2	陈欣欣2	胫骨外固定术;髂内动脉栓塞术;小肠破裂修补术;肠系膜修补术;腹部血肿去除术;皮肤及皮下组织清创术
771	D06(ICU)	2020-06-30	2020-07-03	2994278	桂斌槐	男	23Y	创伤性休克	创伤性骨筋膜室综合征;多发性损伤;全身炎症反应综合征;多器官功能障碍综合征(MODS);代谢性酸中毒;髋臼骨折;髋关节脱位;耻骨骨折;弥散性血管内凝血	死亡	庄荣	郭献阳	郭献阳	大腿截断术
772	D06(ICU)	2020-07-15	2020-07-15	2998442	杨进云	男	58Y	大脑撕裂伤	乙型肝炎小三阳;先天性胃移位;创伤性硬膜下出血;肺特指损伤;多发性肋骨骨折;急性呼吸衰竭;创伤性脑疝;颅底骨折;纵隔疝;心包积液	好转	龚裕强	张文武	张文武	颅骨切除减压术;脑膜切开伴硬脑膜下腔血肿清除术
773	D06(ICU)	2020-07-12	2020-07-19	2999419	华祖福	男	40Y	大脑撕裂伤	多发性损伤;创伤性硬膜下出血;多发性胸椎骨折;头皮血肿;创伤性脑疝;创伤性蛛网膜下腔出血;肋骨骨折;腰椎骨折;肺部感染	未愈	程碧环	程碧环	王本极	脑内血肿清除术;颅骨切除减压术
774	D06(ICU)	2020-07-25	2020-07-26	3002115	潘行近	男	80Y	大脑撕裂伤	创伤性硬膜下出血;头皮血肿;创伤性气胸;创伤性脑疝;创伤性蛛网膜下腔出血;枕骨骨折;颅底骨折;前列腺增生	未愈	程碧环	程碧环	王本极	脑膜切开伴硬脑膜下腔血肿清除术;颅骨切除减压术
775	D06(ICU)	2020-06-16	2020-07-28	3002333	陈金中	男	52Y	特指颈椎骨折	创伤性截瘫;颈部特指部位脱位;呼吸衰竭;肺部感染	好转	庄荣	林孟相	林孟相	椎弓根钉内固定术;颈椎植骨术;颈椎脱位切开复位内固定术;颈椎前路椎管减压术
776	D06(ICU)	2020-07-15	2020-07-29	3002911	陈菊花	女	89Y	股骨粗隆间骨折	血小板减少症;贫血;下肢动脉粥样硬化;大肠杆菌败血症;肾衰竭;肺部感染;心功能不全	好转	程碧环	程碧环	王本极	股骨骨折闭合复位螺钉内固定术
777	D06(ICU)	2020-08-02	2020-08-04	3004827	王德武	男	46Y	创伤性结肠破裂	多发性腰椎骨折;急性弥漫性腹膜炎;多发性肋骨骨折;脊髓损伤;肺挫伤;骶骨骨折;胸椎骨折;创伤性截瘫	未愈	庄荣	魏大臻	魏大臻	乙状结肠破裂修补术;结肠暂时性造口术;腹腔冲洗引流术;剖腹探查术
778	D06(ICU)	2020-08-01	2020-08-08	3005998	张崇仁	男	45Y	尿毒症	高血压病;2型糖尿病;股骨颈骨折;继发性贫血;肺部感染;精神分裂症;肋骨骨折	好转	庄荣	陈建时	陈建时
779	D06(ICU)	2020-08-01	2020-08-10	3006848	陈碎华	女	55Y	大脑撕裂伤	高钠血症;胆囊结石;创伤性硬膜下出血;多发性肋骨骨折;2型糖尿病;尿崩症;肩胛骨骨折;髂骨骨折;腰椎骨折;枕骨骨折	未愈	庄荣	陈欣欣2	陈欣欣2	颅骨切除减压术;脑内血肿清除术
780	D06(ICU)	2020-08-22	2020-08-22	3011215	李德建	男	43Y	创伤性休克	呼吸心跳骤停;多发性腰椎骨折;多发性骨盆骨折;腰背部皮肤撕脱伤;多发性肋骨骨折	死亡	庄荣	林孟相	林孟相	髂内动脉栓塞术;皮肤及皮下组织清创术;压力绷带固定;伤口止血术
781	D06(ICU)	2020-08-23	2020-08-31	3014011	时伯祥	男	43Y	大脑撕裂伤	中枢性呼吸衰竭;寰枢椎脱位;创伤性硬膜下出血;多处挫伤;颞骨骨折;颅底骨折;循环衰竭	死亡	龚裕强	张晓隆	张晓隆	脑膜切开伴硬脑膜下腔血肿清除术;颅骨金属板去除术
782	D06(ICU)	2020-08-08	2020-09-12	3017593	蒋兴胜	男	40Y	大脑撕裂伤	慢性上颌窦炎;创伤性硬膜下出血;慢性筛窦炎;头皮血肿;创伤性脑疝;创伤性蛛网膜下腔出血;顶骨骨折	好转	庄荣	郭献阳	郭献阳	脑内血肿清除术;颅骨切除减压术
783	D06(ICU)	2020-10-13	2020-10-13	3027775	杨建华	男	46Y	创伤性硬膜下出血	创伤性蛛网膜下腔出血;脑疝;多发性颅骨骨折;胸椎骨折;第一颈椎骨折;肺挫伤;呼吸心跳骤停;心脏停搏复苏成功;休克;头部浅表损伤;中耳和乳突疾患	未愈	程碧环	程碧环	王本极
784	D06(ICU)	2020-10-03	2020-10-14	3027781	陈克静	男	43Y	大脑撕裂伤	创伤性蛛网膜下腔出血;创伤性硬膜下出血;高钠血症;2型糖尿病;额骨骨折;低钾血症	死亡	庄荣	陈欣欣2	714099	颅骨切除减压术;脑内血肿清除术
785	D06(ICU)	2020-09-06	2020-10-15	3028013	高仁杰	男	66Y	创伤性硬膜下出血	特指手术后状态;膀胱造口状态;下肢深静脉血栓性静脉炎;急性失血性贫血;锁骨骨折;创伤性尿道断裂;骨盆骨折;多发性颈椎骨折;肺部感染;肺挫伤;创伤性脑血肿;失血性休克;创伤性蛛网膜下腔出血;创伤性腹膜后血肿	未愈	程碧环	戴凌燕	戴凌燕
786	D06(ICU)	2020-10-15	2020-10-15	3028206	Я无名9321	男	39Y	创伤性硬膜外出血	创伤性蛛网膜下腔出血;创伤性硬膜下出血;脑疝;肺挫伤;呼吸衰竭;循环衰竭;多发性颅骨骨折;头皮血肿	未愈	程碧环	戴凌燕	戴凌燕
787	D06(ICU)	2020-10-13	2020-10-21	3030473	王万妹	女	67Y	开放性膝部损伤	耻骨联合扭伤;多发性肋骨骨折;多发性腰椎骨折;脂肪肝;肾积水伴肾结石;髌骨骨折;胆囊切除术后状态;感染性休克;脓毒血症;腹水;感染性多器官功能障碍综合征;肺部感染;高血压病;髂骨骨折;消化道出血;骶骨骨折	未愈	庄荣	魏大臻	魏大臻	皮肤和皮下坏死组织切除清创术;伤口止血术;皮肤和皮下组织切开引流术
788	D06(ICU)	2020-10-20	2020-10-21	3030474	Я无名9381	男	35Y	创伤性硬膜下出血	头皮血肿;创伤性蛛网膜下腔出血;多发性颅骨骨折;创伤性脑疝;中枢性呼吸衰竭;循环衰竭	死亡	程碧环	戴凌燕	216175	脑内血肿清除术;颅骨切除减压术
789	D06(ICU)	2020-10-18	2020-11-01	3033846	谢小华	女	55Y	骨盆骨折	肘关节脱位;腰椎骨折;腹水;颈椎间盘突出;颈椎退行性病变;肝硬化失代偿期;失血性休克;盆腔积液，女性;桡骨头骨折;肱骨外髁骨折;肺挫伤	好转	林孟相	王本极	王本极	髂动脉造影;髂内动脉栓塞术
790	D06(ICU)	2020-10-24	2020-11-04	3035173	杨彩环	女	93Y	股骨干骨折	慢性阻塞性肺病;重症肺炎;股骨颈骨折;呼吸衰竭	治愈	程碧环	程碧环	216175	股骨骨折切开复位钢板内固定术;丙烯酸水泥骨空隙填充
791	D06(ICU)	2020-11-06	2020-11-06	3035875	陈林钗	女	57Y	脑挫伤	创伤性硬膜下出血;创伤性脑疝;颅骨骨折	未愈	程碧环	程碧环	程碧环	脑膜切开伴硬脑膜下腔血肿清除术;颅骨切除减压术
792	D06(ICU)	2020-10-17	2020-11-24	3041745	吴克前	男	72Y	颈椎骨折	创伤性截瘫;肾结石;低T3综合征;室性早搏;颈部脊髓损伤;前列腺增生;脂肪肝;肺部感染;胸腔积液;下肢动脉粥样硬化;颈椎滑脱	好转	龚裕强	张晓隆	张晓隆	椎管减压术;后入路颈椎融合术;脊椎骨折复位术;颈椎间盘髓核切除术;颈椎植骨术
793	D06(ICU)	2020-11-29	2020-11-29	3043398	刘香兰	女	64Y	脑挫伤	颞骨骨折;锁骨骨折;颈内动脉裂伤;创伤性硬膜外出血;头皮血肿;肺挫伤;创伤性脑疝;创伤性蛛网膜下腔出血	未愈	程碧环	戴凌燕	戴凌燕	颅骨切除减压术;硬脑膜外血肿清除术
794	D06(ICU)	2020-12-07	2020-12-14	3048494	胡志赫	男	83Y	股骨颈骨折	肺部感染;老年性痴呆;肝囊肿;胆囊结石;后天性肾囊肿;前列腺增生;下肢动脉粥样硬化	未愈	龚裕强	陈建时	陈建时
795	D06(ICU)	2020-09-12	2020-12-15	3048589	王德焕	男	68Y	脑挫伤	创伤性硬膜下出血;后天性肾囊肿;创伤性气胸;肺挫伤;创伤性胸腔积液;髌骨骨折;下消化道出血;多发性肋骨骨折;肩胛骨骨折;头皮挫伤;开放性背部损伤;下肢动脉粥样硬化;股静脉血栓性静脉炎;下肢深静脉血栓性静脉炎	好转	庄荣	郭献阳	郭献阳	下腔静脉滤器置入术;股静脉穿刺术
796	D06(ICU)	2020-12-18	2020-12-18	3050059	Я无名62	男	47Y	创伤性脾破裂	多发性肋骨骨折;凝血障碍;颅内损伤;创伤性肾周血肿;耳创伤性切断;失血性休克;颅内出血	死亡	龚裕强	陈欣欣2	陈欣欣2	皮肤缝合术;耳廓清创术;耳廓切除术;皮肤和皮下组织切开引流术;腹部冲洗引流术;脾切除术
797	D06(ICU)	2020-12-16	2020-12-21	3051168	张长青	男	35Y	大脑撕裂伤	颅底骨折;肺部感染;呼吸衰竭;急性肾衰竭;肺挫伤;循环衰竭;急性造血功能抑制;慢性上颌窦炎;慢性筛窦炎;创伤性脑疝;创伤性大脑水肿;蛛网膜下腔出血	未愈	程碧环	戴凌燕	戴凌燕	颅骨切除减压术;脑内血肿清除术
798	D06(ICU)	2020-12-22	2020-12-22	3051323	程昆峰	男	42Y	创伤性脑疝	创伤性急性硬膜下出血;颅骨骨折;头皮裂伤;创伤性气胸;多发性肋骨骨折;创伤性胸腔积液;肾上腺损伤;脾损伤	死亡	林坚	林坚	李丹东	颅骨切除减压术;脑内血肿清除术
799	D06(ICU)	2020-11-28	2020-12-23	3051583	郑英昌	男	77Y	股骨粗隆间骨折	心脏停搏复苏成功;呼吸心跳骤停;肝囊肿;前列腺结石;下肢动脉粥样硬化;老年性脑萎缩;肺部感染;帕金森综合征	好转	龚裕强	张晓隆	张晓隆	股骨骨折切开复位髓内针内固定术
800	D07儿童骨科、骨盆外科	2019-12-29	2020-01-02	2937448	金圣瑶	女	4Y	取除骨折内固定装置		其他	张敬东	毛诚晃	方明桥	胫骨内固定物取出术
801	D07儿童骨科、骨盆外科	2019-12-19	2020-01-02	2937466	林佳胜	男	27Y	股骨骨折		治愈	翁益民	翁益民	翁益民	股骨骨折闭合复位术
802	D07儿童骨科、骨盆外科	2019-12-25	2020-01-02	2937467	姜远财	男	42Y	尺骨骨折	头皮挫伤	治愈	翁益民	翁益民	翁益民	尺骨骨折切开复位术
803	D07儿童骨科、骨盆外科	2019-12-30	2020-01-02	2937520	王晶晶	女	2Y	肱骨髁上骨折		治愈	张敬东	张敬东	闫广奎	肱骨骨折切开复位术
804	D07儿童骨科、骨盆外科	2019-12-29	2020-01-04	2937766	肖健雄	男	9Y	踝骨闭合性骨折		治愈	张敬东	张敬东	方明桥	踝关节骨折闭合复位术
805	D07儿童骨科、骨盆外科	2019-12-26	2020-01-04	2937777	武梦宇	女	8Y	股骨骨折		治愈	张敬东	张敬东	李玉安	股骨骨折切开复位术
806	D07儿童骨科、骨盆外科	2019-12-27	2020-01-04	2937780	林大宝	男	8Y	肱骨髁上骨折		治愈	张敬东	张敬东	李玉安	肱骨骨折切开复位术
807	D07儿童骨科、骨盆外科	2019-12-27	2020-01-04	2937797	张爱菊	女	72Y	肱骨外科颈骨折		治愈	孔建中	孔建中	柯陈荣	肱骨骨折切开复位术
808	D07儿童骨科、骨盆外科	2019-12-29	2020-01-04	2937802	沈艺	男	13Y	尺骨桡骨远端骨折		治愈	张敬东	李玉安	方明桥	尺骨骨折闭合复位术;桡骨骨折切开复位术
809	D07儿童骨科、骨盆外科	2019-12-26	2020-01-04	2937823	徐歆悦	女	10Y	双踝骨折		治愈	张敬东	张敬东	李玉安	踝关节骨折切开复位术
810	D07儿童骨科、骨盆外科	2019-12-28	2020-01-05	2938095	张珈鸣	男	2Y	股骨骨折		治愈	张敬东	张敬东	李玉安	股骨骨折切开复位术
811	D07儿童骨科、骨盆外科	2019-12-28	2020-01-05	2938098	朱子仁奕	男	4Y	尺骨桡骨远端骨折	桡神经损害	治愈	张敬东	张敬东	李玉安	尺骨楔形截骨术
812	D07儿童骨科、骨盆外科	2019-12-18	2020-01-05	2938104	陈立瑞	男	42Y	多发性损伤	楔状骨骨折(足);跖骨骨折;腓骨骨折	治愈	翁益民	翁益民	翁益民	楔骨骨折切开复位螺钉内固定术;跖骨骨折闭合复位术;趾肌腱缝合术;腓骨骨折切开复位术
813	D07儿童骨科、骨盆外科	2019-12-03	2020-01-06	2938353	孙荣狄	男	8Y	慢性骨髓炎	骨折治疗后恢复期	治愈	张敬东	李玉安	方明桥	皮肤和皮下组织血肿抽吸术;尺骨内固定物取出术;手清创术
814	D07儿童骨科、骨盆外科	2019-12-24	2020-01-06	2938435	叶纪秋	男	63Y	股骨颈骨折	颧骨骨折;上颌骨骨折;急性蝶窦炎;急性筛窦炎;耻骨骨折;软组织疾患;老年性脑萎缩;创伤性肺破裂;脑挫伤;蛛网膜下腔出血	治愈	孔建中	孔建中	柯陈荣	股骨骨折切开复位术
815	D07儿童骨科、骨盆外科	2019-12-26	2020-01-06	2938438	汤芷欣	女	7Y	股骨干骨折		治愈	张敬东	张敬东	闫广奎	股骨骨折切开复位术
816	D07儿童骨科、骨盆外科	2019-12-25	2020-01-06	2938527	戴伟阳	男	31Y	胫骨骨折	膝关节十字韧带扭伤;膝关节副韧带劳损	治愈	赵友明	赵友明	郭伟军	胫骨骨折切开复位术
817	D07儿童骨科、骨盆外科	2020-01-02	2020-01-07	2938666	毛桢超	男	13Y	桡骨上端骨折		治愈	张敬东	李玉安	方明桥	桡骨骨折闭合复位术
818	D07儿童骨科、骨盆外科	2020-01-04	2020-01-07	2938670	丁晓雅	女	1Y	取除骨折内固定装置		其他	张敬东	李玉安	方明桥	股骨内固定物取出术
819	D07儿童骨科、骨盆外科	2019-12-31	2020-01-08	2939009	林丐朋	男	61Y	外踝骨折	踝骨闭合性骨折;高血压病;前列腺结石;肾结石;单纯性肾囊肿	治愈	翁益民	翁益民	翁益民	踝关节骨折切开复位术
820	D07儿童骨科、骨盆外科	2019-12-29	2020-01-08	2939015	泮香娇	女	48Y	髋臼骨折	特指手术后状态;颅腔积气;盆腔积液，女性;颞骨骨折;硬膜外血肿;头皮挫伤;颧骨骨折;创伤性胸腔积液	治愈	孔建中	孔建中	柯陈荣	髋骨骨折切开复位钢板内固定术
821	D07儿童骨科、骨盆外科	2020-01-03	2020-01-08	2939025	卢梓伊	女	1Y	肱骨髁上骨折		治愈	张敬东	张敬东	李玉安	肱骨骨折闭合复位术
822	D07儿童骨科、骨盆外科	2019-12-25	2020-01-08	2939033	林银娒	男	86Y	股骨粗隆间骨折	白内障;高血压病	好转	孔建中	孔建中	柯陈荣
823	D07儿童骨科、骨盆外科	2019-12-29	2020-01-08	2939040	林飞跃	男	16Y	胫骨骨折		治愈	翁益民	翁益民	翁益民	胫骨骨折切开复位术
824	D07儿童骨科、骨盆外科	2019-12-31	2020-01-09	2939307	王俊杰	男	15Y	髂骨骨折		好转	孔建中	孔建中	柯陈荣	骨盆骨折切开复位钢板内固定术
825	D07儿童骨科、骨盆外科	2020-01-05	2020-01-09	2939451	陈慧敏	女	25Y	取除骨折内固定装置		其他	翁益民	翁益民	翁益民	锁骨内固定物取出术
826	D07儿童骨科、骨盆外科	2020-01-05	2020-01-11	2939710	林鑫炎	女	7Y	肱骨髁上骨折		治愈	张敬东	李玉安	王伟	肱骨骨折闭合复位术
827	D07儿童骨科、骨盆外科	2020-01-04	2020-01-11	2939715	方瑾	女	2Y	先天性髋关节发育不良	取除骨折内固定装置	好转	张敬东	毛诚晃	王伟	髋关节内固定物取出术
828	D07儿童骨科、骨盆外科	2019-12-30	2020-01-11	2939742	金凤香	女	62Y	胫骨骨折	半月板损伤	治愈	孔建中	孔建中	柯陈荣	胫骨骨折切开复位术
829	D07儿童骨科、骨盆外科	2020-01-01	2020-01-11	2939757	李松泽	男	11Y	股骨干骨折		治愈	张敬东	张敬东	方明桥	股骨骨折切开复位术
830	D07儿童骨科、骨盆外科	2020-01-02	2020-01-11	2939765	周若凯	男	39Y	胫骨骨折		治愈	孔建中	孔建中	柯陈荣	胫骨骨折切开复位术;腓骨骨折切开复位术
831	D07儿童骨科、骨盆外科	2020-01-05	2020-01-11	2939781	黄羿博	男	3M	股骨干骨折		治愈	张敬东	张敬东	闫广奎	股骨骨折切开复位术
832	D07儿童骨科、骨盆外科	2020-01-04	2020-01-11	2939789	邵霄波	女	20Y	取除骨折内固定装置	先天性髋关节脱位;股骨头无菌性坏死	其他	张敬东	张敬东	方明桥	股骨骨折切开复位术
833	D07儿童骨科、骨盆外科	2019-12-19	2020-01-11	2939796	金上如	男	39Y	胫腓骨闭合性骨折	前列腺结石;胆囊结石	治愈	翁益民	翁益民	翁益民	胫骨骨折切开复位术;腓骨骨折切开复位术
834	D07儿童骨科、骨盆外科	2019-12-31	2020-01-12	2940107	杨一帆	男	2Y	股骨干骨折	肺部感染	治愈	翁益民	翁益民	翁益民	股骨骨折闭合复位术
835	D07儿童骨科、骨盆外科	2020-01-06	2020-01-12	2940112	黄继尧	男	6Y	胫腓骨下端骨折		治愈	张敬东	李玉安	方明桥	胫骨骨折闭合复位术;腓骨骨折闭合复位术
836	D07儿童骨科、骨盆外科	2020-01-02	2020-01-12	2940213	林翠柳	女	36Y	锁骨骨折	头皮血肿;肌腱和肌肉损伤;皮肤和皮下组织疾患	好转	余可和	余可和	余可和	锁骨骨折切开复位髓内针内固定术
837	D07儿童骨科、骨盆外科	2019-12-19	2020-01-13	2940455	韩红梅	女	33Y	髋臼骨折	股骨特指部位骨折;头皮血肿	治愈	翁益民	翁益民	翁益民	腓骨骨折切开复位术;踝关节骨折切开复位术;髋关节脱位切开复位内固定术;股骨髁上牵引
838	D07儿童骨科、骨盆外科	2019-12-26	2020-01-14	2940725	林秀成	男	73Y	髌骨骨折	2型糖尿病;高血压病	治愈	孔建中	孔建中	柯陈荣	髌骨骨折切开复位术
839	D07儿童骨科、骨盆外科	2020-01-06	2020-01-14	2940728	陈海波	男	31Y	肱骨外髁骨折	多发性损伤	治愈	孔建中	孔建中	柯陈荣	肱骨骨折切开复位术;石膏外固定去除
840	D07儿童骨科、骨盆外科	2020-01-07	2020-01-14	2940734	陈祖乐	男	5Y	鹰嘴骨折	桡神经损害	治愈	张敬东	李玉安	王伟	尺骨骨折闭合复位术
841	D07儿童骨科、骨盆外科	2020-01-07	2020-01-14	2940738	曾小兰	女	66Y	跟骨骨折	半月板损伤	治愈	翁益民	翁益民	翁益民	跟骨骨折闭合复位术
842	D07儿童骨科、骨盆外科	2020-01-12	2020-01-15	2941081	张仲云	男	6Y	取除骨折内固定装置		其他	张敬东	毛诚晃	毛诚晃	股骨内固定物取出术
843	D07儿童骨科、骨盆外科	2020-01-04	2020-01-15	2941100	朱向荣	男	39Y	髋臼骨折	特指手术后状态;肝硬化伴食管静脉曲张;坐骨神经损害;肾结石;股骨骨折;肋骨骨折	治愈	孔建中	孔建中	柯陈荣	股骨骨折切开复位术;髋骨骨折切开复位钢板内固定术
844	D07儿童骨科、骨盆外科	2020-01-11	2020-01-15	2941103	徐龙翔	男	9Y	取除骨折内固定装置		其他	张敬东	张敬东	方明桥	胫骨内固定物取出术
845	D07儿童骨科、骨盆外科	2020-01-11	2020-01-15	2941140	吴奕博	男	5Y	取除骨折内固定装置		其他	张敬东	李玉安	王伟	尺骨内固定物取出术
846	D07儿童骨科、骨盆外科	2020-01-13	2020-01-16	2941538	李琦韵	女	6Y	肱骨髁上骨折		治愈	张敬东	张敬东	方明桥	肱骨骨折闭合复位术
847	D07儿童骨科、骨盆外科	2020-01-11	2020-01-16	2941545	黄金芷糅	女	7Y	肱骨髁上骨折		治愈	张敬东	王伟	王伟	肱骨骨折闭合复位术
848	D07儿童骨科、骨盆外科	2019-12-30	2020-01-16	2941608	黄美香	女	84Y	股骨颈骨折	腔隙性脑梗死;高血压病	治愈	孔建中	孔建中	柯陈荣	全髋关节置换术
849	D07儿童骨科、骨盆外科	2020-01-10	2020-01-18	2941906	金照佳	女	3Y	肱骨外髁骨折		治愈	张敬东	李玉安	王伟	肱骨骨折切开复位术
850	D07儿童骨科、骨盆外科	2019-12-25	2020-01-18	2941914	林昌伍	男	51Y	胫腓骨下端骨折	肝囊肿;坏疽;前列腺增生	好转	孔建中	孔建中	柯陈荣
851	D07儿童骨科、骨盆外科	2019-12-30	2020-01-18	2941923	陈金媚	女	74Y	股骨颈骨折	2型糖尿病;高血压病;胆囊结石;下肢动脉粥样硬化	治愈	孔建中	孔建中	柯陈荣	人工股骨头置换术
852	D07儿童骨科、骨盆外科	2020-01-09	2020-01-18	2941952	陈文芹	男	55Y	肱骨外髁骨折	单纯性肾囊肿;指骨骨折;下肢动脉粥样硬化;高血压病;上肢皮肤裂伤	治愈	洪建军	洪建军	胡炜	肱骨骨折切开复位术
853	D07儿童骨科、骨盆外科	2020-01-13	2020-01-18	2942024	庄雨涵	女	3Y	开放性拇趾骨折	开放性足损伤	治愈	张敬东	张敬东	闫广奎	趾骨骨折切开复位术
854	D07儿童骨科、骨盆外科	2020-01-05	2020-01-18	2942028	聂兵	男	44Y	跟骨骨折	胫腓骨干骨折;鹰嘴骨折	治愈	孔建中	孔建中	柯陈荣	跟骨骨折切开复位术;尺骨骨折切开复位术;跟骨植骨术;皮肤和皮下组织血肿抽吸术
855	D07儿童骨科、骨盆外科	2020-01-01	2020-01-18	2942119	程旭晨	男	10Y	肱骨髁上骨折		好转	张敬东	李玉安	王伟	肱骨骨折闭合复位术
856	D07儿童骨科、骨盆外科	2020-01-05	2020-01-18	2942197	杨序用	男	53Y	肱骨髁间骨折	特指手术后状态	治愈	孔建中	孔建中	柯陈荣	肱骨骨折切开复位术
857	D07儿童骨科、骨盆外科	2020-01-14	2020-01-19	2942244	徐海翔	男	5Y	取除骨折内固定装置		其他	张敬东	李玉安	王伟	胫骨内固定物取出术
858	D07儿童骨科、骨盆外科	2020-01-14	2020-01-19	2942254	王小芳	女	42Y	三踝骨折	肝囊肿	治愈	孔建中	孔建中	柯陈荣	踝关节骨折切开复位术
859	D07儿童骨科、骨盆外科	2019-12-30	2020-01-19	2942265	金怀胜	男	48Y	骨盆骨折	骶髂关节脱位;肋骨骨折;锁骨骨折	治愈	孔建中	孔建中	柯陈荣	骨盆骨折切开复位钢板内固定术
860	D07儿童骨科、骨盆外科	2019-12-31	2020-01-19	2942268	陈友跑	男	62Y	骨盆骨折	盆腔器官损伤;耻骨联合扭伤;肝回声不均;单纯性肾囊肿;肾结石;陈旧性肺结核;腹壁挫伤;肺结节病;骶髂关节脱位;髂骨骨折;肺部感染;创伤性会阴血肿	治愈	翁益民	翁益民	翁益民	骨盆骨折切开复位钢板内固定术
861	D07儿童骨科、骨盆外科	2020-01-06	2020-01-19	2942269	叶冬兰	女	86Y	股骨颈骨折	颈动脉硬化;下肢动脉粥样硬化;高血压病;肾功能异常;痴呆	治愈	孔建中	孔建中	柯陈荣	全髋关节置换术;股骨病损切除术
862	D07儿童骨科、骨盆外科	2019-11-06	2020-01-20	2942754	陈孙炳	男	35Y	胫骨骨折	肾结石;皮肤挫伤	治愈	孔建中	孔建中	柯陈荣	皮肤及皮下组织清创术;皮肤和皮下组织血肿抽吸术;胫骨内固定物取出术
863	D07儿童骨科、骨盆外科	2020-01-06	2020-01-20	2942761	汪镇和	男	48Y	跟骨骨折	胆囊结石;高血压病;单纯性肾囊肿	治愈	孔建中	孔建中	柯陈荣	跟骨骨折切开复位术;皮肤和皮下组织血肿抽吸术
864	D07儿童骨科、骨盆外科	2020-01-13	2020-01-21	2942906	张顺	男	11Y	尺骨骨折		治愈	张敬东	张敬东	闫广奎	尺骨骨折切开复位术
865	D07儿童骨科、骨盆外科	2020-01-11	2020-01-21	2942930	张继华	男	67Y	骨折治疗后恢复期	高血压病;单纯性肾囊肿;股骨头无菌性坏死;脂肪肝	其他	孔建中	孔建中	柯陈荣	股骨内固定物取出术;全髋关节置换术
866	D07儿童骨科、骨盆外科	2020-01-09	2020-01-21	2942935	廖珠宝	女	4Y	股骨骨折	骨筋膜室综合征;胫腓骨闭合性骨折;跟骨骨折;胫骨骨折;胸椎骨折	治愈	张敬东	张敬东	方明桥	胫骨骨折切开复位术;腓骨骨折切开复位术;小腿减张术
867	D07儿童骨科、骨盆外科	2020-01-09	2020-01-21	2942947	吴细桃	女	59Y	股骨粗隆间骨折	腔隙性脑梗死;多发性脑梗死	治愈	翁益民	翁益民	翁益民	股骨骨折切开复位术
868	D07儿童骨科、骨盆外科	2020-01-07	2020-01-21	2942976	徐碎蕊	女	85Y	股骨颈骨折		治愈	翁益民	翁益民	翁益民	人工股骨头置换术
869	D07儿童骨科、骨盆外科	2020-01-18	2020-01-22	2943289	龙亮	男	13Y	取除骨折内固定装置		其他	张敬东	张敬东	闫广奎	尺骨内固定物取出术
870	D07儿童骨科、骨盆外科	2020-01-17	2020-01-22	2943302	童弘毅	男	10Y	肱骨髁上骨折		治愈	张敬东	李玉安	王伟	肱骨骨骺分离闭合复位术
871	D07儿童骨科、骨盆外科	2020-01-16	2020-01-22	2943333	黄转运	女	72Y	肱骨外科颈骨折	肝囊肿	治愈	孔建中	孔建中	柯陈荣	肱骨骨折切开复位术
872	D07儿童骨科、骨盆外科	2020-01-21	2020-01-22	2943335	刘晓昀	女	46Y	锁骨骨折		好转	翁益民	翁益民	翁益民
873	D07儿童骨科、骨盆外科	2020-01-11	2020-01-22	2943339	陈正铣	男	77Y	三踝骨折	高血压病;单纯性肾囊肿;肝囊肿	治愈	翁益民	翁益民	翁益民	踝关节脱位切开复位术
874	D07儿童骨科、骨盆外科	2020-01-16	2020-01-22	2943534	李海东	男	19Y	距骨骨折	肾结石	治愈	孔建中	孔建中	柯陈荣	距骨骨折切开复位钢板内固定术
875	D07儿童骨科、骨盆外科	2020-01-10	2020-01-23	2943642	金多花	女	83Y	股骨粗隆间骨折	下肢动脉粥样硬化;2型糖尿病;高血压病;下肢动脉硬化闭塞症	治愈	翁益民	翁益民	翁益民	股骨骨折闭合复位术
876	D07儿童骨科、骨盆外科	2020-01-21	2020-01-23	2943711	翁紫杭	男	5Y	取除骨折内固定装置		其他	张敬东	张敬东	闫广奎	尺骨内固定物取出术
877	D07儿童骨科、骨盆外科	2020-01-22	2020-01-24	2943842	张利伟	男	12Y	肱骨骨折		未愈	张敬东	张敬东	方明桥
878	D07儿童骨科、骨盆外科	2020-01-14	2020-01-25	2943996	陈秀妹	女	74Y	股骨骨折		治愈	孔建中	孔建中	柯陈荣	股骨骨折切开复位术
879	D07儿童骨科、骨盆外科	2020-01-18	2020-01-25	2944000	胡浩然	男	7Y	取除骨折内固定装置		其他	张敬东	李玉安	王伟	股骨内固定物取出术
880	D07儿童骨科、骨盆外科	2020-01-18	2020-01-25	2944012	胡婉琪	女	4Y	肱骨髁上骨折		治愈	张敬东	李玉安	王伟	肱骨骨折切开复位术
881	D07儿童骨科、骨盆外科	2020-01-14	2020-01-25	2944044	李锦坤	男	6Y	股骨骨折	鼻骨骨折;眶骨骨折;股骨上端骨骺滑脱;上颌骨骨折	治愈	张敬东	李玉安	王伟	股骨骨折闭合复位术
882	D07儿童骨科、骨盆外科	2020-01-15	2020-01-25	2944060	石春丽	女	12Y	肱骨骨折		治愈	张敬东	张敬东	王伟	肱骨骨折切开复位术
883	D07儿童骨科、骨盆外科	2020-01-19	2020-01-25	2944097	陈宇鹏	男	5Y	取除骨折内固定装置		其他	张敬东	张敬东	闫广奎	胫骨内固定物取出术
884	D07儿童骨科、骨盆外科	2020-01-16	2020-01-25	2944105	虞名赫	男	10Y	锁骨骨折		治愈	张敬东	张敬东	闫广奎	锁骨骨折切开复位术
885	D07儿童骨科、骨盆外科	2019-12-27	2020-01-25	2944330	贾溢渭	男	70Y	脑挫伤	急性冠脉综合征;蛛网膜下腔出血;胫骨骨折;腓骨骨折;股骨颈骨折;内踝骨折	治愈	孔建中	孔建中	柯陈荣	股骨骨折切开复位术;腓骨骨折闭合复位术;全髋关节置换术;胫骨骨折切开复位术;踝关节骨折切开复位术
886	D07儿童骨科、骨盆外科	2020-01-18	2020-01-25	2944331	董祥龙	男	59Y	肱骨外科颈骨折	肝囊肿	治愈	孔建中	孔建中	柯陈荣	肱骨骨折切开复位术
887	D07儿童骨科、骨盆外科	2020-01-15	2020-01-26	2944495	倪婷婷	女	8Y	尺骨桡骨远端骨折	臂丛神经损伤;桡神经损害	治愈	张敬东	王伟	王伟	桡骨骨折切开复位术
888	D07儿童骨科、骨盆外科	2020-01-18	2020-01-26	2944526	林御享	男	6Y	取除骨折内固定装置		其他	张敬东	张敬东	闫广奎	股骨内固定物取出术
889	D07儿童骨科、骨盆外科	2020-01-19	2020-01-26	2944537	白方胜	男	31Y	膝关节十字韧带扭伤	胫骨骨折	治愈	翁益民	翁益民	翁益民	膝关节镜下前十字韧带重建术
890	D07儿童骨科、骨盆外科	2020-01-17	2020-01-26	2944545	张慧敏	女	52Y	胫骨骨折	胆囊结石;肾结石	治愈	孔建中	孔建中	柯陈荣	胫骨骨折切开复位术
891	D07儿童骨科、骨盆外科	2020-01-21	2020-01-27	2944742	闫雨风	女	3Y	取除骨折内固定装置		其他	张敬东	张敬东	闫广奎	股骨内固定物取出术
892	D07儿童骨科、骨盆外科	2020-01-25	2020-01-27	2944807	沈永松	男	58Y	取除骨折内固定装置	单纯性肾囊肿;颈动脉硬化;前列腺结石	其他	孔建中	孔建中	柯陈荣	髌骨内固定物取出术
893	D07儿童骨科、骨盆外科	2020-01-17	2020-01-27	2944830	陈爱荣	男	50Y	跟骨骨折	前列腺结石	治愈	孔建中	孔建中	柯陈荣	跟骨骨折切开复位术
894	D07儿童骨科、骨盆外科	2020-01-22	2020-01-28	2945120	钱鑫有	男	11Y	肱骨干骨折		治愈	张敬东	张敬东	方明桥	肱骨骨折闭合复位术
895	D07儿童骨科、骨盆外科	2020-01-21	2020-01-28	2945125	陈中科	男	11Y	肱骨颈骨折		治愈	张敬东	张敬东	王伟	肱骨骨折切开复位术
896	D07儿童骨科、骨盆外科	2020-01-24	2020-01-28	2945131	黄通佑	男	35Y	髌骨骨折	胆囊息肉	治愈	孔建中	孔建中	柯陈荣	髌骨骨折切开复位术
897	D07儿童骨科、骨盆外科	2020-01-16	2020-01-28	2945134	梁贤银	男	62Y	股骨粗隆下骨折	下肢深静脉血栓性静脉炎	治愈	孔建中	孔建中	柯陈荣	股骨骨折切开复位术
898	D07儿童骨科、骨盆外科	2020-01-25	2020-01-28	2945143	王炜杰	男	7Y	取除骨折内固定装置		其他	张敬东	张敬东	闫广奎	桡骨内固定物取出术
899	D07儿童骨科、骨盆外科	2020-01-25	2020-01-28	2945173	戴宗	男	32Y	涉及骨折板和特指内固定装置的随诊医疗		其他	孔建中	孔建中	柯陈荣
900	D07儿童骨科、骨盆外科	2020-01-25	2020-01-28	2945223	赵柱豪	男	13Y	取除骨折内固定装置		其他	张敬东	张敬东	王伟	桡骨内固定物取出术
901	D07儿童骨科、骨盆外科	2020-01-25	2020-01-28	2945226	程梓桓	男	9Y	取除骨折内固定装置		其他	张敬东	张敬东	王伟	胫骨内固定物取出术
902	D07儿童骨科、骨盆外科	2020-01-26	2020-01-28	2945238	金杨程	男	13Y	取除骨折内固定装置		其他	张敬东	张敬东	方明桥	锁骨内固定物取出术
903	D07儿童骨科、骨盆外科	2020-01-14	2020-01-28	2945423	余涛	男	10Y	髌骨骨折		治愈	张敬东	张敬东	方明桥	髌骨骨折切开复位术
904	D07儿童骨科、骨盆外科	2019-12-31	2020-01-29	2945496	魏什么	男	8Y	胫骨骨折	腓骨骨折	治愈	张敬东	张敬东	王伟	胫骨内固定物取出术
905	D07儿童骨科、骨盆外科	2020-01-26	2020-01-29	2945550	蔡静雯	女	7Y	取除骨折内固定装置		其他	张敬东	张敬东	闫广奎	肱骨内固定物取出术
906	D07儿童骨科、骨盆外科	2020-01-20	2020-01-29	2945645	马爱桃	女	63Y	锁骨骨折	高血压病	治愈	翁益民	翁益民	翁益民	锁骨骨折切开复位术
907	D07儿童骨科、骨盆外科	2020-01-22	2020-01-29	2945647	李伟	男	43Y	三踝骨折		治愈	翁益民	翁益民	翁益民	踝关节骨折切开复位术
908	D07儿童骨科、骨盆外科	2020-01-25	2020-01-30	2946140	姚荔	女	53Y	三踝骨折		治愈	孔建中	孔建中	柯陈荣	踝关节骨折切开复位术
909	D07儿童骨科、骨盆外科	2020-01-28	2020-01-30	2946163	朱名贤	女	11Y	取除骨折内固定装置		其他	张敬东	张敬东	王伟	胫骨骨折切开复位术
910	D07儿童骨科、骨盆外科	2020-01-26	2020-01-30	2946164	林世杰	男	35Y	取除骨折内固定装置		其他	翁益民	翁益民	翁益民	踝关节内固定物取出术
911	D07儿童骨科、骨盆外科	2020-01-25	2020-01-30	2946169	卢瓯露	女	9Y	取除骨折内固定装置		其他	张敬东	张敬东	王伟	胫骨内固定物取出术
912	D07儿童骨科、骨盆外科	2020-01-28	2020-01-30	2946187	曾智朵	女	5Y	取除骨折内固定装置		其他	张敬东	张敬东	方明桥	胫骨内固定物取出术
913	D07儿童骨科、骨盆外科	2020-01-23	2020-01-30	2946193	徐顺可	男	13Y	跟骨骨折	外踝骨折	治愈	孔建中	孔建中	柯陈荣	跟骨骨折切开复位术
914	D07儿童骨科、骨盆外科	2020-01-17	2020-02-01	2946492	谢春兰	女	53Y	跟骨骨折		治愈	孔建中	孔建中	柯陈荣	跟骨骨折切开复位术
915	D07儿童骨科、骨盆外科	2020-01-22	2020-02-01	2946495	余协双	男	47Y	肱骨外髁骨折		治愈	孔建中	孔建中	柯陈荣	桡骨骨折切开复位术;尺骨骨折切开复位术
916	D07儿童骨科、骨盆外科	2020-01-26	2020-02-01	2946500	周旭	男	9Y	胫骨骨折		治愈	翁益民	翁益民	翁益民	胫骨骨折切开复位术
917	D07儿童骨科、骨盆外科	2020-01-27	2020-02-01	2946505	单恩暄	女	10Y	取除骨折内固定装置		其他	张敬东	张敬东	方明桥	股骨内固定物取出术
918	D07儿童骨科、骨盆外科	2020-01-28	2020-02-01	2946507	周佳琪	女	2Y	肱骨外髁骨折	尺骨骨折;鹰嘴骨折	好转	张敬东	张敬东	毛诚晃	肱骨骨折切开复位术
919	D07儿童骨科、骨盆外科	2020-01-28	2020-02-01	2946522	陈传澎	男	4Y	取除骨折内固定装置		其他	张敬东	张敬东	毛诚晃	尺骨内固定物取出术
920	D07儿童骨科、骨盆外科	2020-01-28	2020-02-01	2946527	王文哲	男	8Y	取除骨折内固定装置		其他	张敬东	张敬东	闫广奎	肱骨内固定物取出术;尺骨内固定物取出术
921	D07儿童骨科、骨盆外科	2020-01-26	2020-02-01	2946549	戴锦燿	男	10Y	取除骨折内固定装置		其他	张敬东	张敬东	闫广奎	尺骨内固定物取出术
922	D07儿童骨科、骨盆外科	2020-01-22	2020-02-01	2946554	温秀英	女	64Y	跟骨骨折	脂肪肝;先天性心脏病	治愈	孔建中	孔建中	孔建中	皮肤和皮下组织血肿抽吸术;跟骨骨折切开复位术
923	D07儿童骨科、骨盆外科	2020-01-28	2020-02-01	2946561	潘家俊	男	4Y	取除骨折内固定装置		其他	张敬东	张敬东	闫广奎	尺骨内固定物取出术
924	D07儿童骨科、骨盆外科	2020-01-28	2020-02-01	2946565	叶斌豪	男	11Y	胫骨骨干骨折		治愈	张敬东	李玉安	李玉安	胫骨内固定物取出术
925	D07儿童骨科、骨盆外科	2020-01-16	2020-02-01	2946572	余林弟	女	87Y	股骨颈骨折	糖尿病;下肢动脉粥样硬化;肺部感染;头皮挫伤;高血压病;胆囊结石	治愈	孔建中	孔建中	柯陈荣	全髋关节置换术;股骨骨折切开复位术
926	D07儿童骨科、骨盆外科	2020-01-22	2020-02-02	2946995	王阿连	女	86Y	股骨粗隆间骨折	肺动脉高压中度;高血压病;心肌炎;胸椎骨折;骨质疏松;起搏器安装术后调整	治愈	翁益民	翁益民	翁益民	股骨骨折切开复位术
927	D07儿童骨科、骨盆外科	2020-01-23	2020-02-02	2947012	顾乃六	男	44Y	股骨粗隆间骨折	腓骨骨折;头皮挫伤;陈旧性膝外侧副韧带损伤	治愈	翁益民	翁益民	翁益民	股骨骨折切开复位术
928	D07儿童骨科、骨盆外科	2020-01-29	2020-02-03	2947315	刘小艾	女	15Y	取除骨折内固定装置		其他	张敬东	张敬东	毛诚晃	肱骨内固定物取出术
929	D07儿童骨科、骨盆外科	2020-01-27	2020-02-03	2947356	王彩娟	女	93Y	股骨粗隆间骨折	下肢动脉粥样硬化;高血压病;单纯性肾囊肿;糖尿病;肝囊肿;脂肪肝;低蛋白血症;肾结石	治愈	孔建中	孔建中	柯陈荣	股骨骨折闭合复位术
930	D07儿童骨科、骨盆外科	2020-01-18	2020-02-03	2947411	伍素文	女	79Y	肱骨髁间骨折	单纯性肾囊肿;高血压病	治愈	翁益民	翁益民	翁益民	肱骨骨折闭合复位术
931	D07儿童骨科、骨盆外科	2020-01-31	2020-02-03	2947427	温正棒	男	6Y	取除骨折内固定装置		其他	张敬东	张敬东	闫广奎	胫骨内固定物取出术
932	D07儿童骨科、骨盆外科	2020-01-27	2020-02-03	2947442	朱丽华	女	50Y	腰椎骨折	颈椎间盘突出;骨盆骨折;高血压病	好转	孔建中	孔建中	柯陈荣
933	D07儿童骨科、骨盆外科	2020-01-27	2020-02-03	2947444	戴华柳	女	44Y	胫骨骨折	内踝骨折;胆囊息肉	治愈	孔建中	孔建中	柯陈荣	胫骨骨折切开复位术;踝关节骨折切开复位术
934	D07儿童骨科、骨盆外科	2020-01-27	2020-02-03	2947458	林露锋	男	26Y	尺骨骨折	脂肪肝;肾结石	治愈	孔建中	孔建中	柯陈荣	尺骨骨折切开复位术
935	D07儿童骨科、骨盆外科	2020-01-27	2020-02-03	2947467	朱文春	男	82Y	股骨粗隆间骨折	人工髋关节;下肢深静脉血栓性静脉炎;下肢动脉粥样硬化;特指手术后状态	治愈	孔建中	孔建中	柯陈荣	股骨骨折闭合复位术
936	D07儿童骨科、骨盆外科	2020-02-02	2020-02-04	2947825	庄子昂	男	14Y	取除骨折内固定装置		其他	张敬东	张敬东	毛诚晃	锁骨内固定物取出术
937	D07儿童骨科、骨盆外科	2020-02-01	2020-02-04	2947835	董炫艳	女	10Y	取除骨折内固定装置		其他	张敬东	张敬东	毛诚晃	胫骨内固定物取出术
938	D07儿童骨科、骨盆外科	2020-02-01	2020-02-04	2947837	黎高华	男	5Y	取除骨折内固定装置		其他	张敬东	张敬东	闫广奎	股骨内固定物取出术
939	D07儿童骨科、骨盆外科	2020-01-24	2020-02-04	2947841	王彬哲	男	8Y	下肢皮肤感染	股骨下端骨折;下肢皮肤套脱伤	好转	张敬东	张敬东	毛诚晃	股骨骨折切开复位术;膝关节镜下后十字韧带重建术;皮肤和皮下组织血肿抽吸术;皮肤及皮下组织清创术
940	D07儿童骨科、骨盆外科	2020-01-21	2020-02-04	2947842	吴金应	男	36Y	胫腓骨干骨折		治愈	翁益民	翁益民	翁益民	胫骨骨折切开复位术
941	D07儿童骨科、骨盆外科	2020-02-01	2020-02-05	2948186	张辰欣	女	3Y	肱骨外髁骨折		治愈	张敬东	张敬东	闫广奎	关节软骨修复术;肱骨骨折闭合复位术
942	D07儿童骨科、骨盆外科	2020-01-27	2020-02-05	2948191	陈维解	男	52Y	内踝骨折	胫腓骨下端骨折	治愈	孔建中	孔建中	柯陈荣	踝关节骨折切开复位术;腓骨骨折切开复位术
943	D07儿童骨科、骨盆外科	2020-02-01	2020-02-05	2948197	王烨	男	11Y	取除骨折内固定装置		其他	张敬东	张敬东	毛诚晃	股骨内固定物取出术
944	D07儿童骨科、骨盆外科	2020-01-28	2020-02-05	2948202	陈玉花	女	53Y	三踝骨折	颈动脉硬化;心房颤动;心功能不全;单纯性肾囊肿;老年性心脏病;高血压病	治愈	孔建中	孔建中	柯陈荣	踝关节骨折切开复位术
945	D07儿童骨科、骨盆外科	2020-01-28	2020-02-05	2948212	林福云	男	50Y	开放性胫腓骨干骨折	特指手术后状态;脂肪肝;胆囊结石	治愈	孔建中	孔建中	柯陈荣	肱骨骨折闭合复位螺钉内固定术
946	D07儿童骨科、骨盆外科	2020-01-25	2020-02-05	2948216	陈两双	男	59Y	桡骨上端骨折	腕骨骨折;腰椎骨折;正中神经损害;手舟状骨骨折	治愈	翁益民	翁益民	翁益民	桡骨骨折闭合复位术;腕骨骨折闭合复位钢针内固定术
947	D07儿童骨科、骨盆外科	2020-01-30	2020-02-05	2948245	郑建义	男	50Y	三踝骨折	脂肪肝;胆囊胆固醇沉着症	治愈	孔建中	孔建中	柯陈荣	踝关节骨折切开复位术
948	D07儿童骨科、骨盆外科	2020-01-28	2020-02-06	2948683	吴莉莉	女	68Y	股骨颈骨折	肾结石;下肢动脉粥样硬化	治愈	孔建中	孔建中	柯陈荣	股骨骨折切开复位术
949	D07儿童骨科、骨盆外科	2020-01-22	2020-02-06	2948721	陈中华	男	41Y	开放性腓骨骨折	小腿水平腓神经损伤;小腿撕脱伤	治愈	翁益民	翁益民	翁益民	皮肤及皮下组织清创术;皮肤和皮下组织血肿抽吸术;腓骨骨折切开复位钢板内固定术;腓神经缝合术
950	D07儿童骨科、骨盆外科	2020-02-03	2020-02-06	2948885	邰依诺	女	1Y	开放性特指指骨骨折	腕和手水平特指手指伸肌和肌腱损伤;特指手指血管损伤;特指手指指神经损伤	治愈	张敬东	张敬东	毛诚晃	手清创术;指骨骨折切开复位术;指神经探查术
951	D07儿童骨科、骨盆外科	2020-02-02	2020-02-06	2948931	杨锐	男	2Y	肱骨外髁骨折		治愈	张敬东	张敬东	闫广奎	肱骨骨折切开复位术
952	D07儿童骨科、骨盆外科	2020-01-03	2020-02-06	2948936	徐忠伟	男	12Y	股骨骨折	下肢皮肤感染;腓骨骨折;腕和手水平拇指内在肌和肌腱损伤;胫骨骨折	治愈	张敬东	张敬东	毛诚晃	皮肤和皮下组织脓肿抽吸术;皮肤和皮下坏死组织切除清创术;股骨骨折切开复位术;胫骨骨折切开复位术;腓骨骨折切开复位术
953	D07儿童骨科、骨盆外科	2020-02-04	2020-02-06	2948964	陈盈钎	女	9Y	取除骨折内固定装置		其他	张敬东	张敬东	毛诚晃	胫骨内固定物取出术
954	D07儿童骨科、骨盆外科	2020-01-29	2020-02-06	2949052	徐佳音	女	58Y	股骨骨折		治愈	翁益民	翁益民	翁益民	股骨骨折切开复位术
955	D07儿童骨科、骨盆外科	2020-02-03	2020-02-06	2949098	陈洁	女	36Y	桡骨头骨折	肘关节僵硬;肝囊肿;肱骨外髁骨折	治愈	翁益民	翁益民	翁益民	桡骨骨折切开复位术
956	D07儿童骨科、骨盆外科	2020-02-02	2020-02-06	2949107	陈满叶	女	64Y	股骨粗隆间骨折	尺骨下端骨折	治愈	翁益民	翁益民	翁益民	股骨骨折切开复位术
957	D07儿童骨科、骨盆外科	2020-02-02	2020-02-07	2949192	高有可	男	26Y	肱骨外髁骨折	脂肪肝;尺骨骨折	治愈	孔建中	孔建中	柯陈荣	肱骨骨折切开复位术
958	D07儿童骨科、骨盆外科	2020-01-29	2020-02-07	2949282	朱珠玉	女	75Y	胫骨骨折	下肢动脉粥样硬化;人工髋关节;脾囊肿;类风湿性关节炎;单纯性肾囊肿	治愈	孔建中	孔建中	柯陈荣	胫骨骨折切开复位术
959	D07儿童骨科、骨盆外科	2020-02-10	2020-02-12	2949717	李布川	男	11Y	肱骨上端骨折		未愈	张敬东	张敬东	方明桥
960	D07儿童骨科、骨盆外科	2020-02-06	2020-02-12	2949756	林营	男	2Y	肱骨骨折	尺骨骨折;鹰嘴骨折	好转	张敬东	张敬东	毛诚晃	肱骨骨折切开复位术
961	D07儿童骨科、骨盆外科	2020-02-08	2020-02-12	2949758	蔡诗蕊	女	5Y	肱骨髁上骨折		治愈	张敬东	张敬东	毛诚晃	肱骨骨折切开复位术
962	D07儿童骨科、骨盆外科	2020-02-02	2020-02-12	2949809	吴才春	男	65Y	股骨颈骨折		治愈	翁益民	翁益民	翁益民	人工股骨头置换术
963	D07儿童骨科、骨盆外科	2020-02-13	2020-02-13	2949890	赵东	男	35Y	胫骨骨折	膝关节积液;腓骨骨折	好转	孔建中	孔建中	柯陈荣
964	D07儿童骨科、骨盆外科	2020-02-12	2020-02-13	2949920	徐宗弟	女	83Y	股骨颈骨折	高血压病;脑梗死	好转	孔建中	孔建中	柯陈荣
965	D07儿童骨科、骨盆外科	2020-02-09	2020-02-15	2950177	陈楠楠	女	2Y	胫骨骨折		治愈	张敬东	张敬东	毛诚晃
966	D07儿童骨科、骨盆外科	2020-01-28	2020-02-15	2950179	陈秀莲	女	76Y	股骨干骨折	高血压病;下肢动脉粥样硬化	治愈	孔建中	孔建中	柯陈荣	股骨骨折切开复位术
967	D07儿童骨科、骨盆外科	2020-02-12	2020-02-16	2950351	吴亿翰	男	1Y	肱骨髁上骨折		治愈	张敬东	张敬东	毛诚晃	肱骨骨折切开复位术
968	D07儿童骨科、骨盆外科	2020-02-10	2020-02-16	2950357	陈开杰	男	5Y	肱骨髁上骨折		治愈	张敬东	李玉安	王伟	肱骨骨折切开复位术
969	D07儿童骨科、骨盆外科	2020-02-14	2020-02-16	2950358	吴雨含	女	4Y	取除骨折内固定装置		其他	张敬东	张敬东	毛诚晃	胫骨内固定物取出术
970	D07儿童骨科、骨盆外科	2020-02-14	2020-02-16	2950365	单依慧	女	10Y	取除骨折内固定装置		其他	张敬东	张敬东	毛诚晃	胫骨内固定物取出术
971	D07儿童骨科、骨盆外科	2020-02-14	2020-02-16	2950385	张信基	男	14Y	取除骨折内固定装置		其他	张敬东	张敬东	毛诚晃	胫骨内固定物取出术
972	D07儿童骨科、骨盆外科	2020-02-02	2020-02-16	2950424	郑玲香	女	80Y	股骨颈骨折	下肢动脉粥样硬化;肾结石;帕金森病;老年性脑萎缩	治愈	孔建中	孔建中	柯陈荣	人工股骨头置换术
973	D07儿童骨科、骨盆外科	2020-02-13	2020-02-17	2950635	黄经淇	男	1Y	肱骨髁上骨折		好转	张敬东	张敬东	毛诚晃	肱骨骨折闭合复位术
974	D07儿童骨科、骨盆外科	2020-02-12	2020-02-17	2950639	吕素绿	女	44Y	桡骨头骨折	肝硬化;桡骨颈骨折;肝囊肿	治愈	孔建中	孔建中	柯陈荣	桡骨骨折切开复位术
975	D07儿童骨科、骨盆外科	2020-02-13	2020-02-17	2950642	陈崇男	男	16Y	肱骨干骨折		治愈	孔建中	孔建中	柯陈荣	肱骨骨折切开复位术
976	D07儿童骨科、骨盆外科	2020-02-13	2020-02-17	2950685	包邦祥	男	36Y	股骨粗隆间骨折	骨折治疗后恢复期	治愈	孔建中	孔建中	柯陈荣	股骨骨折闭合复位术
977	D07儿童骨科、骨盆外科	2020-02-11	2020-02-18	2950931	谢炀	男	5Y	股骨骨折		治愈	张敬东	张敬东	方明桥	股骨骨折切开复位术
978	D07儿童骨科、骨盆外科	2020-02-14	2020-02-18	2950954	陈亲杰	男	2Y	肱骨内髁骨折		治愈	张敬东	李玉安	毛诚晃	肱骨骨折切开复位术
979	D07儿童骨科、骨盆外科	2020-02-12	2020-02-18	2951039	潘娟明	女	59Y	桡骨骨折		治愈	孔建中	孔建中	柯陈荣	桡骨骨折切开复位术
980	D07儿童骨科、骨盆外科	2020-02-11	2020-02-18	2951048	柯金朴	男	3Y	胫骨骨折	开放性多发性损伤;腓骨骨折	治愈	张敬东	张敬东	毛诚晃	胫骨骨折闭合复位术;腓骨骨折闭合复位术
981	D07儿童骨科、骨盆外科	2020-02-15	2020-02-19	2951362	黄钏胤	男	7Y	取除骨折内固定装置		其他	张敬东	张敬东	毛诚晃	尺骨内固定物取出术
982	D07儿童骨科、骨盆外科	2020-02-15	2020-02-19	2951369	何金磊	男	6Y	取除骨折内固定装置		其他	张敬东	闫广奎	闫广奎	股骨内固定物取出术
983	D07儿童骨科、骨盆外科	2020-02-15	2020-02-19	2951370	谢紫涵	女	4Y	肱骨髁上骨折		治愈	张敬东	张敬东	毛诚晃	肱骨骨折切开复位术
984	D07儿童骨科、骨盆外科	2020-02-14	2020-02-19	2951401	徐家奕	男	10Y	肱骨外髁骨折		治愈	张敬东	张敬东	毛诚晃	肱骨骨折切开复位术
985	D07儿童骨科、骨盆外科	2020-02-15	2020-02-19	2951404	张天豪	男	8Y	肱骨髁上骨折		治愈	张敬东	张敬东	毛诚晃	肱骨骨折闭合复位术
986	D07儿童骨科、骨盆外科	2020-02-13	2020-02-19	2951465	余承环	男	69Y	髌骨骨折	下肢静脉炎和血栓性静脉炎;下肢动脉粥样硬化;股四头肌腱断裂;高血压病	治愈	孔建中	孔建中	柯陈荣	髌骨骨折切开复位术;股四头肌成形术
987	D07儿童骨科、骨盆外科	2020-02-13	2020-02-19	2951492	张惠豹	男	59Y	骨盆骨折	消化性溃疡;多发性损伤;肺挫伤;骶骨骨折;腰椎骨折;胸腔积液	治愈	孔建中	孔建中	柯陈荣	骨盆骨折闭合复位术
988	D07儿童骨科、骨盆外科	2020-02-12	2020-02-20	2951704	谢用进	男	91Y	股骨粗隆间骨折	下肢动脉粥样硬化;胫前动脉狭窄;前列腺增生;膀胱炎;股动脉闭塞	治愈	孔建中	孔建中	柯陈荣	股骨骨折闭合复位术
989	D07儿童骨科、骨盆外科	2020-02-14	2020-02-20	2951705	杨佳琦	女	10Y	肱骨髁上骨折		治愈	张敬东	张敬东	毛诚晃	肱骨骨折闭合复位术
990	D07儿童骨科、骨盆外科	2020-02-12	2020-02-20	2951827	林希玲	女	58Y	肱骨干骨折	胆囊结石;高血压病;脂肪肝	治愈	孔建中	孔建中	柯陈荣	肱骨骨折切开复位术
991	D07儿童骨科、骨盆外科	2020-02-12	2020-02-22	2952084	曾彩云	女	63Y	肱骨骨折		治愈	翁益民	翁益民	翁益民	肱骨骨折切开复位术
992	D07儿童骨科、骨盆外科	2020-02-16	2020-02-22	2952088	袁廷海	男	11Y	肱骨髁上骨折		好转	张敬东	张敬东	毛诚晃	肱骨骨折切开复位术
993	D07儿童骨科、骨盆外科	2020-02-17	2020-02-22	2952089	毛依凡	女	2Y	肱骨髁上骨折		治愈	张敬东	张敬东	毛诚晃	肱骨骨折闭合复位术
994	D07儿童骨科、骨盆外科	2020-02-11	2020-02-22	2952092	缪可言	女	5Y	股骨粗隆下骨折		好转	张敬东	张敬东	毛诚晃	股骨骨折切开复位术
995	D07儿童骨科、骨盆外科	2020-02-17	2020-02-22	2952093	陈如跃	男	13Y	肱骨髁上骨折		治愈	张敬东	张敬东	方明桥	肱骨骨折闭合复位术
996	D07儿童骨科、骨盆外科	2020-02-14	2020-02-22	2952106	张纯巧	男	51Y	股骨颈骨折	高血压病;乙型肝炎小三阳;单纯性肾囊肿;肾结石	治愈	翁益民	翁益民	翁益民	股骨骨折切开复位术
997	D07儿童骨科、骨盆外科	2020-02-11	2020-02-22	2952189	袁瑞珍	女	46Y	特指部位骨折不连接	肾结石;取除骨折内固定装置	治愈	孔建中	孔建中	柯陈荣	锁骨内固定物取出术;锁骨植骨术;锁骨骨折切开复位术
998	D07儿童骨科、骨盆外科	2020-02-16	2020-02-22	2952195	蔡雨芯	女	4Y	取除骨折内固定装置		其他	张敬东	张敬东	毛诚晃	股骨内固定物取出术
999	D07儿童骨科、骨盆外科	2020-02-01	2020-02-22	2952291	林林英	女	70Y	胫腓骨下端骨折	胆囊结石;肾积水伴肾结石	治愈	翁益民	翁益民	翁益民	胫骨骨折切开复位术;腓骨骨折切开复位术
1000	D07儿童骨科、骨盆外科	2020-02-13	2020-02-22	2952296	王光良	男	64Y	胫骨骨折	特指手术后状态;恶性肿瘤个人史;前列腺结石;前列腺增生	治愈	孔建中	孔建中	柯陈荣	胫骨骨折切开复位术
1001	D07儿童骨科、骨盆外科	2020-02-19	2020-02-23	2952458	张叶倩	女	14Y	取除骨折内固定装置		其他	张敬东	张敬东	毛诚晃	跟骨内固定物取出术
1002	D07儿童骨科、骨盆外科	2020-02-14	2020-02-23	2952461	朱雨辰	男	5Y	胫腓骨干骨折		治愈	张敬东	王伟	闫广奎	胫骨骨折切开复位术;腓骨骨折切开复位术
1003	D07儿童骨科、骨盆外科	2020-01-30	2020-02-23	2952467	黄爱华	女	86Y	股骨骨折	高血压病;低钾血症;贫血;2型糖尿病	治愈	孔建中	孔建中	柯陈荣	股骨骨折闭合复位术
1004	D07儿童骨科、骨盆外科	2020-02-15	2020-02-23	2952484	林建静	男	39Y	肱骨外科颈骨折	脂肪肝	治愈	孔建中	孔建中	柯陈荣	肱骨骨折闭合复位术
1005	D07儿童骨科、骨盆外科	2020-02-11	2020-02-23	2952530	陈建云	男	53Y	胫骨骨折	胆囊息肉;脂肪肝	治愈	孔建中	孔建中	柯陈荣	胫骨骨折切开复位术
1006	D07儿童骨科、骨盆外科	2020-02-16	2020-02-23	2952550	潘鑫博	男	7Y	尺骨骨折	桡神经损害;正中神经损害	治愈	张敬东	张敬东	王伟	尺骨骨折切开复位术
1007	D07儿童骨科、骨盆外科	2020-02-13	2020-02-24	2952780	谢重余	男	28Y	胫骨骨折	腓骨骨折;下肢皮肤撕裂伤	治愈	孔建中	孔建中	柯陈荣	胫骨外固定术;胫骨植骨术;皮肤和皮下坏死组织切除清创术;胫骨骨折切开复位术
1008	D07儿童骨科、骨盆外科	2020-02-18	2020-02-24	2952786	叶文哲	男	32Y	鹰嘴骨折	脂肪肝	治愈	孔建中	孔建中	柯陈荣	尺骨骨折切开复位术
1009	D07儿童骨科、骨盆外科	2020-02-17	2020-02-24	2952793	王珏	男	12Y	桡骨上端骨折		好转	张敬东	张敬东	毛诚晃	桡骨骨折切开复位术
1010	D07儿童骨科、骨盆外科	2020-02-20	2020-02-24	2952795	吴宁雅	女	1Y	胫骨骨折	跖骨骨折	好转	张敬东	张敬东	毛诚晃
1011	D07儿童骨科、骨盆外科	2020-02-02	2020-02-25	2953099	柯有余	男	65Y	开放性足损伤	跖趾关节脱位;下肢静脉炎和血栓性静脉炎;跖骨骨折	治愈	翁益民	翁益民	翁益民	跖骨骨折切开复位术;皮肤和皮下坏死组织切除清创术;皮肤和皮下组织切开引流术
1012	D07儿童骨科、骨盆外科	2020-02-15	2020-02-25	2953115	陈润泽	男	1Y	开放性特指指骨骨折	开放性手指损伤不伴指甲损害	治愈	张敬东	张敬东	王伟	手清创术;指骨骨折切开复位术;伸指肌腱缝合术
1013	D07儿童骨科、骨盆外科	2020-02-21	2020-02-25	2953128	王贤权	男	11Y	肱骨髁上骨折		治愈	张敬东	张敬东	闫广奎	肱骨骨折切开复位术
1014	D07儿童骨科、骨盆外科	2020-02-15	2020-02-25	2953154	孔爱蕊	女	53Y	股骨头无菌性坏死	骨折治疗后随诊检查;乙型病毒性肝炎	治愈	孔建中	孔建中	柯陈荣	全髋关节置换术
1015	D07儿童骨科、骨盆外科	2020-02-23	2020-02-25	2953195	杨晨旭	男	7Y	取除骨折内固定装置		其他	张敬东	张敬东	闫广奎	尺骨内固定物取出术
1016	D07儿童骨科、骨盆外科	2020-02-22	2020-02-26	2953463	钱凯	男	6Y	肱骨髁上骨折		好转	张敬东	张敬东	毛诚晃	肱骨骨折闭合复位术
1017	D07儿童骨科、骨盆外科	2020-02-19	2020-02-26	2953482	刘怡晨	女	6Y	胫骨骨折		治愈	张敬东	张敬东	毛诚晃	胫骨骨折闭合复位术
1018	D07儿童骨科、骨盆外科	2020-02-22	2020-02-26	2953488	李康乐	男	5Y	取除骨折内固定装置		其他	张敬东	毛诚晃	闫广奎	股骨内固定物取出术
1019	D07儿童骨科、骨盆外科	2020-02-18	2020-02-26	2953491	胡可馨	女	3Y	胫骨骨折	腓骨骨折	治愈	张敬东	李玉安	毛诚晃
1020	D07儿童骨科、骨盆外科	2020-02-19	2020-02-26	2953492	陈玉水	男	75Y	股骨干骨折	下肢动脉粥样硬化;前列腺结石	治愈	孔建中	孔建中	柯陈荣	股骨骨折切开复位术
1021	D07儿童骨科、骨盆外科	2020-02-16	2020-02-26	2953522	施忠义	男	34Y	腓骨骨折	外踝骨折;内踝骨折	治愈	翁益民	翁益民	翁益民	踝关节骨折切开复位术
1022	D07儿童骨科、骨盆外科	2020-02-24	2020-02-27	2953882	戚少莲	女	60Y	取除骨折内固定装置	骨质疏松	其他	翁益民	翁益民	翁益民	股骨内固定物取出术
1023	D07儿童骨科、骨盆外科	2020-02-15	2020-02-27	2953905	叶小妹	女	90Y	股骨粗隆间骨折	腰椎间盘突出;高血压病;胸椎骨折	治愈	孔建中	孔建中	柯陈荣	人工股骨头置换术;髋关节松解术
1024	D07儿童骨科、骨盆外科	2020-02-25	2020-02-28	2954105	林非锐	男	4Y	取除骨折内固定装置		其他	张敬东	张敬东	毛诚晃	股骨内固定物取出术
1025	D07儿童骨科、骨盆外科	2020-02-14	2020-02-29	2954320	来凤恩	男	89Y	股骨粗隆间骨折	下肢动脉粥样硬化;高血压病;单纯性肾囊肿;肺大泡;糖尿病	治愈	孔建中	翁益民	孔建中	股骨骨折切开复位术
1026	D07儿童骨科、骨盆外科	2020-02-20	2020-02-29	2954330	朱希晨	男	10Y	肱骨外科颈骨折		治愈	张敬东	张敬东	毛诚晃	肱骨骨折切开复位术
1027	D07儿童骨科、骨盆外科	2020-02-18	2020-02-29	2954346	杨宝香	女	78Y	股骨颈骨折	单纯性肾囊肿;高血压病;下肢动脉粥样硬化	治愈	孔建中	孔建中	柯陈荣	股骨病损切除术;全髋关节置换术
1028	D07儿童骨科、骨盆外科	2020-02-15	2020-02-29	2954355	徐忠伟	男	12Y	骨折内固定物植入感染		治愈	张敬东	张敬东	毛诚晃
1029	D07儿童骨科、骨盆外科	2020-02-18	2020-02-29	2954371	王淑英	女	90Y	股骨颈骨折	单纯性肾囊肿;下肢动脉粥样硬化	治愈	孔建中	孔建中	柯陈荣	股骨病损切除术;全髋关节置换术
1030	D07儿童骨科、骨盆外科	2020-02-18	2020-02-29	2954381	金圣标	男	66Y	胫骨骨干骨折	外踝骨折;肝硬化	治愈	翁益民	翁益民	翁益民	胫骨骨折切开复位术;腓骨骨折切开复位术
1031	D07儿童骨科、骨盆外科	2020-02-23	2020-02-29	2954386	朱师东	男	46Y	取除骨折内固定装置	胆囊结石;高血压病;糖尿病	其他	翁益民	翁益民	翁益民	髌骨内固定物取出术
1032	D07儿童骨科、骨盆外科	2020-02-14	2020-02-29	2954390	高支英	女	57Y	股骨颈骨折	下肢静脉炎和血栓性静脉炎;下肢动脉粥样硬化	治愈	翁益民	翁益民	翁益民	股骨骨折闭合复位术
1033	D07儿童骨科、骨盆外科	2020-02-20	2020-02-29	2954393	温彩微	女	31Y	内踝骨折	腓骨骨折	治愈	翁益民	翁益民	翁益民	踝关节骨折切开复位术
1034	D07儿童骨科、骨盆外科	2020-02-24	2020-02-29	2954404	朱孔银	男	37Y	取除骨折内固定装置	胆囊结石;前列腺结石	其他	孔建中	孔建中	柯陈荣	髋关节内固定物取出术
1035	D07儿童骨科、骨盆外科	2020-02-26	2020-03-01	2954742	季慧藏	男	10Y	肱骨髁上骨折		好转	张敬东	张敬东	毛诚晃
1036	D07儿童骨科、骨盆外科	2020-02-14	2020-03-01	2954746	程春景	女	45Y	跟骨骨折		治愈	孔建中	孔建中	柯陈荣	跟骨骨折切开复位术
1037	D07儿童骨科、骨盆外科	2020-02-27	2020-03-03	2955352	潘国者	男	64Y	髌骨骨折		治愈	张宇	陈成旺	陈成旺	髌骨骨折切开复位术
1038	D07儿童骨科、骨盆外科	2020-03-01	2020-03-03	2955384	蔡妹	女	24Y	锁骨骨折		治愈	郭晓山	吴剑彬	吴剑彬
1039	D07儿童骨科、骨盆外科	2020-02-23	2020-03-03	2955387	黄佑法	男	23Y	外踝骨折		治愈	翁益民	翁益民	翁益民	踝关节骨折切开复位术
1040	D07儿童骨科、骨盆外科	2020-02-25	2020-03-03	2955388	黄凌风	男	11Y	肱骨髁上骨折		治愈	张敬东	毛诚晃	方明桥	肱骨骨折切开复位术
1041	D07儿童骨科、骨盆外科	2020-02-16	2020-03-03	2955393	程昌多	男	59Y	股骨头无菌性坏死	股骨颈骨折	治愈	翁益民	翁益民	翁益民	股骨内固定物取出术;全髋关节置换术
1042	D07儿童骨科、骨盆外科	2020-02-21	2020-03-03	2955509	郑鑫峰	男	3Y	多发性损伤	脑挫伤;视神经损伤;皮肤挫伤;眶骨骨折;颅骨骨折;股骨干骨折	好转	张敬东	张敬东	方明桥	股骨骨折切开复位术
1043	D07儿童骨科、骨盆外科	2020-02-23	2020-03-03	2955534	朱秀琴	女	81Y	股骨骨折		治愈	孔建中	孔建中	柯陈荣	股骨骨折切开复位术
1044	D07儿童骨科、骨盆外科	2020-02-28	2020-03-04	2955726	冯李桉	男	6Y	股骨骨折		治愈	孔建中	孔建中	柯陈荣	股骨骨折切开复位术
1045	D07儿童骨科、骨盆外科	2020-02-29	2020-03-04	2955794	金宇翔	男	4Y	取除骨折内固定装置		其他	张敬东	张敬东	毛诚晃	股骨内固定物取出术
1046	D07儿童骨科、骨盆外科	2020-02-26	2020-03-04	2955797	陈钦条	男	54Y	髌骨骨折	股四头肌腱断裂	治愈	孔建中	孔建中	柯陈荣	髌骨骨折切开复位术
1047	D07儿童骨科、骨盆外科	2020-02-24	2020-03-04	2955807	王小霞	女	65Y	三踝骨折		治愈	翁益民	翁益民	翁益民	踝关节骨折切开复位术
1048	D07儿童骨科、骨盆外科	2020-03-02	2020-03-04	2955849	胡湘东	男	8Y	病理性骨折	骨囊肿;肱骨骨折	好转	张敬东	张敬东	方明桥
1049	D07儿童骨科、骨盆外科	2020-03-01	2020-03-04	2955964	王波	男	13Y	取除骨折内固定装置		其他	张敬东	李玉安	毛诚晃	跟骨内固定物取出术
1050	D07儿童骨科、骨盆外科	2020-03-01	2020-03-04	2956023	张良生	男	55Y	取除骨折内固定装置		其他	翁益民	翁益民	翁益民	踝关节内固定物取出术
1051	D07儿童骨科、骨盆外科	2020-03-01	2020-03-04	2956024	彭国永	男	47Y	取除骨折内固定装置		其他	杨雷	杨雷	项光恒	胫骨内固定物取出术
1052	D07儿童骨科、骨盆外科	2020-02-18	2020-03-04	2956026	单梓轩	男	6Y	股骨骨折	脑发育不全;癫痫;颈椎半脱位;肋骨骨折;皮肤挫伤	治愈	张敬东	张敬东	毛诚晃	股骨骨折切开复位术
1053	D07儿童骨科、骨盆外科	2020-02-26	2020-03-05	2956182	蒋海平	男	57Y	跟骨骨折		治愈	翁益民	翁益民	翁益民	跟骨骨折闭合复位术
1054	D07儿童骨科、骨盆外科	2020-02-16	2020-03-07	2956452	尤文辉	男	58Y	大腿软组织疾患	桡骨骨折	治愈	翁益民	翁益民	翁益民	桡骨内固定物取出术;皮肤和皮下组织切开引流术
1055	D07儿童骨科、骨盆外科	2020-02-27	2020-03-07	2956607	林健伟	男	11Y	股骨骨折	慢性肾脏病1期	治愈	张敬东	张敬东	毛诚晃
1056	D07儿童骨科、骨盆外科	2020-03-01	2020-03-07	2956622	陈云	男	17Y	取除骨折内固定装置		其他	杨雷	杨雷	项光恒	肱骨内固定物取出术
1057	D07儿童骨科、骨盆外科	2020-03-01	2020-03-07	2956631	戴雪春	女	46Y	取除骨折内固定装置		其他	孔建中	孔建中	柯陈荣	胫骨内固定物取出术
1058	D07儿童骨科、骨盆外科	2020-03-03	2020-03-07	2956634	叶佳萱	女	7Y	肱骨髁上骨折		好转	张敬东	张敬东	毛诚晃	肱骨骨折切开复位术
1059	D07儿童骨科、骨盆外科	2020-02-26	2020-03-07	2956642	黄煜博	男	5Y	胫骨骨折		治愈	张敬东	张敬东	毛诚晃	胫骨骨折切开复位术
1060	D07儿童骨科、骨盆外科	2020-03-01	2020-03-07	2956653	泮香玉	女	67Y	取除骨折内固定装置		其他	孔建中	孔建中	柯陈荣	股骨内固定物取出术
1061	D07儿童骨科、骨盆外科	2020-02-24	2020-03-07	2956675	严昌育	男	83Y	股骨颈骨折	高血压病;支气管炎	好转	孔建中	孔建中	柯陈荣	全髋关节置换术;股骨骨折闭合复位术
1062	D07儿童骨科、骨盆外科	2020-02-26	2020-03-07	2956677	王毅	男	9Y	桡骨骨折		治愈	张敬东	毛诚晃	毛诚晃	桡骨骨折切开复位术
1063	D07儿童骨科、骨盆外科	2020-03-01	2020-03-07	2956684	汤玉娥	女	48Y	内踝骨折	腓骨骨折	治愈	孔建中	孔建中	柯陈荣	踝关节骨折闭合复位术
1064	D07儿童骨科、骨盆外科	2020-02-16	2020-03-07	2956688	施世浩	男	16Y	骨盆骨折	失血性休克;开放性多发性损伤;肱骨骨折;股骨骨折	治愈	孔建中	孔建中	柯陈荣	股骨骨折切开复位螺钉内固定术;骨盆骨折切开复位螺钉内固定术;肱骨骨折切开复位螺钉内固定术
1065	D07儿童骨科、骨盆外科	2020-03-04	2020-03-07	2956847	李永垚	男	85Y	开放性头部损伤	肌腱和肌肉损伤;髋关节病;单纯性肾囊肿;头皮血肿;腓骨骨折;肺部感染;胫骨骨折	治愈	洪建军	陈鸿亮	陈鸿亮
1066	D07儿童骨科、骨盆外科	2020-02-25	2020-03-08	2956922	黎丽玲	女	52Y	胫骨骨折	腓骨骨折	好转	孔建中	孔建中	柯陈荣	腓骨骨折切开复位术;胫骨骨折切开复位术
1067	D07儿童骨科、骨盆外科	2020-03-04	2020-03-08	2956926	王迪	男	6Y	取除骨折内固定装置		其他	张敬东	张敬东	毛诚晃	股骨内固定物取出术
1068	D07儿童骨科、骨盆外科	2020-02-29	2020-03-08	2957063	柯昌华	男	40Y	股骨颈骨折	骨盆骨折	好转	孔建中	孔建中	柯陈荣	骨盆骨折闭合复位术;股骨骨折闭合复位术
1069	D07儿童骨科、骨盆外科	2020-03-06	2020-03-09	2957293	梁皓文	男	2Y	腓骨骨折	胫骨骨折	治愈	张敬东	张敬东	毛诚晃
1070	D07儿童骨科、骨盆外科	2020-02-29	2020-03-09	2957321	许长发	男	55Y	内踝骨折	头部浅表损伤;头皮血肿;肺大泡;外踝骨折;肺挫伤	好转	孔建中	孔建中	柯陈荣	踝关节骨折切开复位术
1071	D07儿童骨科、骨盆外科	2020-03-07	2020-03-09	2957322	金志蓉	男	52Y	取除骨折内固定装置		其他	孔建中	孔建中	柯陈荣	髌骨内固定物取出术
1072	D07儿童骨科、骨盆外科	2020-03-04	2020-03-09	2957330	李全红	男	43Y	股骨粗隆间骨折	慢性前列腺炎	好转	洪建军	陈鸿亮	陈鸿亮
1073	D07儿童骨科、骨盆外科	2020-02-23	2020-03-09	2957357	王昌华	男	24Y	股骨粗隆间骨折		治愈	翁益民	翁益民	翁益民	股骨骨折闭合复位术
1074	D07儿童骨科、骨盆外科	2020-03-07	2020-03-10	2957534	张译之	女	3Y	取除骨折内固定装置		其他	张敬东	王伟	毛诚晃	股骨内固定物取出术
1075	D07儿童骨科、骨盆外科	2020-03-05	2020-03-10	2957537	戚栩榮	男	8Y	肱骨干骨折		治愈	张敬东	张敬东	毛诚晃	肱骨骨折闭合复位术
1076	D07儿童骨科、骨盆外科	2020-03-03	2020-03-10	2957538	潘李众	男	38Y	跟骨骨折		治愈	孔建中	孔建中	柯陈荣	跟骨骨折切开复位术
1077	D07儿童骨科、骨盆外科	2020-02-29	2020-03-10	2957542	李慈惠	女	65Y	股骨颈骨折		治愈	孔建中	孔建中	柯陈荣	股骨骨折切开复位术
1078	D07儿童骨科、骨盆外科	2020-03-07	2020-03-10	2957545	陈好	女	12Y	胫骨骨折	腓骨骨折	好转	张敬东	张敬东	毛诚晃
1079	D07儿童骨科、骨盆外科	2020-03-04	2020-03-10	2957562	蒋梓枫	男	6Y	桡骨骨折		治愈	张敬东	张敬东	毛诚晃	桡骨骨折切开复位术
1080	D07儿童骨科、骨盆外科	2020-03-01	2020-03-11	2957997	陈成谦	男	73Y	多发性损伤	大腿肌断裂;开放性膝部损伤;肱骨外髁骨折	好转	孔建中	孔建中	柯陈荣	下肢肌腱缝合术;皮肤和皮下组织血肿抽吸术;石膏绷带固定;皮肤缝合术
1081	D07儿童骨科、骨盆外科	2020-03-05	2020-03-11	2958006	李好	女	10Y	桡骨骨折		治愈	张敬东	张敬东	毛诚晃	桡骨骨折闭合复位术
1082	D07儿童骨科、骨盆外科	2020-02-18	2020-03-14	2958801	郑凤菊	女	82Y	股骨颈骨折	腔隙性脑梗死;老年性脑萎缩;高血压病;胆总管梗阻	好转	孔建中	孔建中	柯陈荣	全髋关节置换术
1083	D07儿童骨科、骨盆外科	2020-02-18	2020-03-14	2958819	徐玉菊	女	78Y	股骨骨折	下肢动脉粥样硬化;慢性支气管炎;肱骨外科颈骨折;高血压病	好转	孔建中	孔建中	柯陈荣	股骨骨折切开复位术
1084	D07儿童骨科、骨盆外科	2020-02-17	2020-03-14	2958822	谭钰菲	女	3M	开放性跖骨骨折	创伤后趾骨坏死;趾关节脱位	治愈	张敬东	张敬东	毛诚晃	趾骨骨折切开复位术;跖骨骨折切开复位术;皮肤和皮下坏死组织切除清创术;截断残端的修正术
1085	D07儿童骨科、骨盆外科	2020-03-08	2020-03-14	2958828	陈礼淮	男	12Y	桡骨颈骨折	特指手术后状态;心动过缓;完全性右束支传导阻滞	治愈	张敬东	张敬东	毛诚晃	桡骨骨折切开复位术
1086	D07儿童骨科、骨盆外科	2020-03-10	2020-03-14	2958843	杨经雕	男	56Y	取除骨折内固定装置	高血压病	其他	余可和	余可和	余可和	桡骨骨折切开复位术
1087	D07儿童骨科、骨盆外科	2020-03-04	2020-03-14	2958845	胡澄毅	男	9Y	肱骨髁上骨折		好转	张敬东	张敬东	毛诚晃	肱骨骨折切开复位术
1088	D07儿童骨科、骨盆外科	2020-03-09	2020-03-14	2958851	潘俊程	男	7Y	肱骨髁上骨折		治愈	张敬东	张敬东	毛诚晃	肱骨骨折闭合复位术
1089	D07儿童骨科、骨盆外科	2020-03-04	2020-03-14	2958858	胡银挑	女	81Y	股骨粗隆间骨折		治愈	孔建中	孔建中	柯陈荣	股骨骨折闭合复位术
1090	D07儿童骨科、骨盆外科	2020-03-02	2020-03-14	2958862	李倪骏	男	1Y	跖骨骨折	下肢皮肤套脱伤	好转	张敬东	张敬东	毛诚晃
1091	D07儿童骨科、骨盆外科	2020-02-15	2020-03-14	2958868	施陈林	男	61Y	外踝骨折	踝关节脱位;趾关节脱位;颈椎间盘突出;特指手术后状态	治愈	孔建中	孔建中	柯陈荣	踝关节骨折切开复位术
1092	D07儿童骨科、骨盆外科	2020-03-01	2020-03-15	2959171	李苏兰	女	69Y	跟骨骨折	肱骨髁间骨折;肱骨髁上骨折	好转	孔建中	孔建中	柯陈荣	跟骨骨折切开复位术;肱骨骨折切开复位术
1093	D07儿童骨科、骨盆外科	2020-03-03	2020-03-15	2959173	王彩菊	女	80Y	股骨颈骨折	老年性脑萎缩;腔隙性脑梗死;单纯性肾囊肿	好转	孔建中	孔建中	柯陈荣	股骨骨折闭合复位术
1094	D07儿童骨科、骨盆外科	2020-03-09	2020-03-15	2959174	陈奥	男	7Y	距骨骨折		治愈	张敬东	李玉安	毛诚晃	距骨骨折闭合复位术
1095	D07儿童骨科、骨盆外科	2020-03-09	2020-03-15	2959386	罗立杖	男	11Y	肱骨髁上骨折		治愈	张敬东	张敬东	闫广奎	肱骨骨折切开复位术
1096	D07儿童骨科、骨盆外科	2020-03-08	2020-03-16	2959526	王述君	女	62Y	髌骨骨折	股四头肌腱断裂;子宫平滑肌瘤;高血压病;滑膜破裂;室性早搏;脂肪肝;心脏瓣膜病;特指手术后状态	好转	孔建中	孔建中	柯陈荣	髌骨骨折切开复位术;股四头肌成形术
1097	D07儿童骨科、骨盆外科	2020-03-09	2020-03-16	2959530	陈欣宇	男	2Y	股骨干骨折		治愈	张敬东	李玉安	毛诚晃	石膏绷带固定;股骨骨折闭合复位术
1098	D07儿童骨科、骨盆外科	2020-02-24	2020-03-16	2959535	吴刘府	男	53Y	胫腓骨闭合性骨折	踝关节脱位	治愈	翁益民	翁益民	翁益民	踝关节骨折切开复位术;胫骨骨折闭合复位术;腓骨骨折切开复位术
1099	D07儿童骨科、骨盆外科	2020-02-25	2020-03-16	2959537	金东波	男	28Y	股骨干骨折		治愈	赵友明	赵友明	郭伟军	股骨骨折切开复位术
1100	D07儿童骨科、骨盆外科	2020-03-06	2020-03-16	2959573	郑庆柯	男	59Y	髌骨骨折	股四头肌腱断裂;滑膜破裂	治愈	孔建中	孔建中	柯陈荣	髌骨骨折切开复位术;股四头肌成形术
1101	D07儿童骨科、骨盆外科	2020-03-06	2020-03-17	2959793	肖思璇	女	6Y	开放性多发性骨折	颧骨骨折;气胸;肺挫伤;股骨骨折	好转	张敬东	张敬东	毛诚晃	股骨骨折切开复位术;下颌骨骨折切开复位内固定术
1102	D07儿童骨科、骨盆外科	2020-03-08	2020-03-17	2959794	李正怀	男	49Y	跟骨骨折		治愈	翁益民	翁益民	翁益民	跟骨骨折切开复位术
1103	D07儿童骨科、骨盆外科	2020-03-12	2020-03-17	2959800	金兰芬	女	60Y	内踝骨折	高血压病;子宫切除术后状态;外踝骨折	治愈	孔建中	孔建中	柯陈荣	踝关节骨折切开复位术
1104	D07儿童骨科、骨盆外科	2020-03-12	2020-03-17	2959815	季彩华	女	73Y	肱骨外科颈骨折	高血压病;肩锁关节脱位	好转	孔建中	孔建中	柯陈荣	肱骨骨折切开复位术;肩锁关节脱位切开复位术
1105	D07儿童骨科、骨盆外科	2020-03-01	2020-03-17	2959818	毛刘粉	女	52Y	开放性多发性损伤	膝关节副韧带劳损;半月板损伤;软组织疾患;子宫平滑肌瘤;骨盆骨折;脂肪肝;单纯性肾囊肿	好转	孔建中	孔建中	柯陈荣	骨盆骨折闭合复位术
1106	D07儿童骨科、骨盆外科	2020-03-05	2020-03-17	2959822	林笑兰	女	82Y	股骨粗隆间骨折	精神分裂症;传导性耳聋	好转	翁益民	翁益民	翁益民	股骨骨折切开复位术
1107	D07儿童骨科、骨盆外科	2020-03-12	2020-03-17	2959825	朱乾涛	男	11Y	尺骨桡骨远端骨折		治愈	张敬东	易先宏	毛诚晃	桡骨骨折闭合复位术
1108	D07儿童骨科、骨盆外科	2020-03-14	2020-03-17	2959971	常宸睿	男	3Y	取除骨折内固定装置		其他	张敬东	毛诚晃	毛诚晃	股骨内固定物取出术
1109	D07儿童骨科、骨盆外科	2020-03-01	2020-03-18	2960210	干梓鑫	男	1Y	病毒性脑炎后遗症	骨折治疗后恢复期;颅内出血;股骨骨折;癫痫;偏瘫	好转	汤行录	刘婵	刘婵	股骨骨折闭合复位术;石膏外固定去除
1110	D07儿童骨科、骨盆外科	2020-03-06	2020-03-18	2960211	黄正文	男	35Y	髌骨骨折		治愈	翁益民	翁益民	翁益民	髌骨骨折切开复位术
1111	D07儿童骨科、骨盆外科	2020-03-05	2020-03-18	2960289	陈步银	男	82Y	肱骨外科颈骨折	2型糖尿病;高血压病	治愈	翁益民	翁益民	翁益民	肱骨人工骨植骨术
1112	D07儿童骨科、骨盆外科	2020-03-16	2020-03-18	2960290	欧阳重宇	男	2Y	肱骨髁上骨折	桡骨头脱位	治愈	张敬东	易先宏	毛诚晃
1113	D07儿童骨科、骨盆外科	2020-03-13	2020-03-19	2960603	林伟邦	男	10Y	桡骨颈骨折	肱骨骨折	治愈	张敬东	张敬东	毛诚晃	桡骨骨折切开复位术
1114	D07儿童骨科、骨盆外科	2020-03-11	2020-03-19	2960606	贾智帆	男	3Y	股骨骨折		治愈	张敬东	张敬东	闫广奎	股骨骨折闭合复位术
1115	D07儿童骨科、骨盆外科	2020-03-03	2020-03-19	2960637	周盛哲	男	6Y	开放性股骨骨折	头皮裂伤;眼睑挫伤;脑挫伤;眶骨骨折;腹水;蛛网膜下腔出血;急性创伤性胰腺炎，轻症;创伤性胰腺破裂;软组织疾患;肺挫伤	好转	张敬东	易先宏	毛诚晃	皮肤和皮下组织血肿抽吸术;皮肤缝合术;股骨骨折切开复位术
1116	D07儿童骨科、骨盆外科	2020-03-15	2020-03-19	2960666	黄承谊	男	18Y	尺骨桡骨远端骨折	尺骨茎突骨折;肝损伤;下颌骨骨折	好转	孔建中	王鉴顺	柯陈荣	桡骨骨折切开复位术
1117	D07儿童骨科、骨盆外科	2020-03-14	2020-03-19	2960673	叶晓微	女	33Y	取除骨折内固定装置	乙型肝炎小三阳	其他	孔建中	王鉴顺	柯陈荣	髋关节内固定物取出术
1118	D07儿童骨科、骨盆外科	2020-03-17	2020-03-21	2960926	王梓萱	女	3M	肱骨髁上骨折		治愈	张敬东	毛诚晃	毛诚晃	肱骨骨折闭合复位术
1119	D07儿童骨科、骨盆外科	2020-03-09	2020-03-21	2960933	季绍敏	男	38Y	髌骨骨折		治愈	翁益民	翁益民	翁益民	髌骨骨折切开复位术
1120	D07儿童骨科、骨盆外科	2020-03-15	2020-03-21	2960934	叶亚涵	男	16Y	内踝骨折	踝关节脱位	治愈	翁益民	翁益民	翁益民	踝关节骨折切开复位术
1121	D07儿童骨科、骨盆外科	2020-03-11	2020-03-21	2960942	彭盛博	男	12Y	胫骨骨折		治愈	张敬东	张敬东	毛诚晃	胫骨骨折切开复位术
1122	D07儿童骨科、骨盆外科	2020-03-17	2020-03-21	2960959	李世楷	男	6Y	肱骨外髁骨折		治愈	张敬东	易先宏	毛诚晃	肱骨骨折闭合复位术
1123	D07儿童骨科、骨盆外科	2020-03-17	2020-03-21	2960970	陈奕霖	男	3Y	取除骨折内固定装置		其他	张敬东	李玉安	毛诚晃	胫骨内固定物取出术
1124	D07儿童骨科、骨盆外科	2020-03-11	2020-03-21	2960992	杨语嫣	女	5Y	胫骨骨折		治愈	张敬东	张敬东	毛诚晃	距骨骨折闭合复位术
1125	D07儿童骨科、骨盆外科	2020-03-11	2020-03-21	2961000	周秀艳	女	7Y	肱骨髁上骨折		治愈	张敬东	张敬东	毛诚晃	肱骨骨折闭合复位术
1126	D07儿童骨科、骨盆外科	2020-03-05	2020-03-21	2961016	赵有龙	男	42Y	胫骨骨折	腓骨骨折;坏疽	治愈	翁益民	翁益民	翁益民	皮肤和皮下组织脓肿抽吸术
1127	D07儿童骨科、骨盆外科	2020-03-11	2020-03-21	2961032	叶莲莲	女	77Y	股骨颈骨折	高血压病;2型糖尿病	治愈	孔建中	王鉴顺	柯陈荣	全髋关节置换术
1128	D07儿童骨科、骨盆外科	2020-03-12	2020-03-21	2961214	潘昱名	男	6Y	股骨骨折		治愈	张敬东	张敬东	毛诚晃	股骨骨折切开复位术
1129	D07儿童骨科、骨盆外科	2020-03-18	2020-03-22	2961374	周鹏	男	3Y	肱骨髁上骨折		治愈	张敬东	张敬东	毛诚晃	肱骨骨折闭合复位术
1130	D07儿童骨科、骨盆外科	2020-03-17	2020-03-23	2960954	齐佳佳	女	7Y	肱骨髁上骨折		治愈	易先宏	闫广奎	王伟	肱骨骨折闭合复位术
1131	D07儿童骨科、骨盆外科	2020-03-19	2020-03-23	2961647	吴昭超	男	12Y	胫腓骨下端骨折		治愈	王振文	王振文	水小龙
1132	D07儿童骨科、骨盆外科	2020-03-17	2020-03-23	2961648	卢磊	男	2Y	肱骨髁上骨折		治愈	张敬东	张敬东	毛诚晃	肱骨骨折闭合复位术
1133	D07儿童骨科、骨盆外科	2020-03-06	2020-03-23	2961650	董英	男	26Y	桡骨上端骨折	尺骨茎突骨折	治愈	翁益民	翁益民	翁益民	桡骨骨折切开复位术
1134	D07儿童骨科、骨盆外科	2020-03-20	2020-03-24	2962008	朱松林	女	58Y	取除骨折内固定装置	高血压病;心房颤动	其他	孔建中	王鉴顺	柯陈荣	锁骨内固定物取出术
1135	D07儿童骨科、骨盆外科	2020-03-16	2020-03-24	2962014	邵爱月	女	68Y	股骨颈骨折		好转	孔建中	王鉴顺	柯陈荣	全髋关节置换术
1136	D07儿童骨科、骨盆外科	2020-03-20	2020-03-24	2962021	陈志才	男	44Y	取除骨折内固定装置		其他	孔建中	王鉴顺	柯陈荣	髌骨内固定物取出术
1137	D07儿童骨科、骨盆外科	2020-03-13	2020-03-24	2962029	江珠凤	女	79Y	股骨颈骨折	单纯性肾囊肿;肺纤维化;肱骨骨折;肋骨骨折;食管裂孔疝	好转	孔建中	孔建中	柯陈荣	全髋关节置换术
1138	D07儿童骨科、骨盆外科	2020-03-21	2020-03-25	2962320	陈锦媛	女	2Y	肱骨髁上骨折		治愈	张敬东	易先宏	毛诚晃	肱骨骨折闭合复位术
1139	D07儿童骨科、骨盆外科	2020-03-21	2020-03-25	2962382	林海丘	女	50Y	取除骨折内固定装置		其他	孔建中	王鉴顺	柯陈荣	胫骨内固定物取出术
1140	D07儿童骨科、骨盆外科	2020-03-11	2020-03-25	2962655	叶银昆	男	92Y	内踝骨折	精索鞘膜积液;睾丸鞘膜积液;手软组织疾患;髋臼骨折;肱骨骨折;骨盆骨折;耻骨骨折;肺部感染	好转	孔建中	王鉴顺	柯陈荣	骨盆骨折闭合复位术
1141	D07儿童骨科、骨盆外科	2020-03-21	2020-03-28	2963156	孙万年	男	4Y	取除骨折内固定装置		其他	张敬东	毛诚晃	毛诚晃	盆骨内固定物取出术
1142	D07儿童骨科、骨盆外科	2020-03-22	2020-03-28	2963167	陈振杰	男	10Y	尺骨桡骨远端骨折		治愈	张敬东	毛诚晃	毛诚晃	桡骨骨折闭合复位术
1143	D07儿童骨科、骨盆外科	2020-03-23	2020-03-28	2963175	叶河长	男	51Y	取除骨折内固定装置		其他	翁益民	翁益民	翁益民	肱骨内固定物取出术
1144	D07儿童骨科、骨盆外科	2020-03-12	2020-03-28	2963189	邹成区	男	52Y	开放性胫骨骨折	浅表损伤;局部肿物	好转	孔建中	王鉴顺	柯陈荣	胫骨骨折切开复位术;皮肤和皮下组织异物切开取出术
1145	D07儿童骨科、骨盆外科	2020-03-21	2020-03-28	2963240	胡美凤	女	68Y	锁骨骨折	高血压病;2型糖尿病	好转	孔建中	王鉴顺	柯陈荣	锁骨骨折切开复位术
1146	D07儿童骨科、骨盆外科	2020-03-16	2020-03-28	2963246	张武胜	男	26Y	跖骨骨折	特指手术后状态;乙型病毒性肝炎	治愈	孔建中	王鉴顺	柯陈荣	跖骨骨折闭合复位术
1147	D07儿童骨科、骨盆外科	2020-03-22	2020-03-28	2963251	黄欣意	女	12Y	肱骨髁上骨折		治愈	张敬东	易先宏	毛诚晃	肱骨骨折切开复位术
1148	D07儿童骨科、骨盆外科	2020-03-24	2020-03-28	2963285	陈娅琪	女	11Y	肱骨外科颈骨折		治愈	孔建中	王鉴顺	柯陈荣	肱骨骨折切开复位术
1149	D07儿童骨科、骨盆外科	2020-03-17	2020-03-29	2963577	项杨娥	女	80Y	股骨颈骨折	单纯性肾囊肿;2型糖尿病;高血压病	好转	孔建中	王鉴顺	柯陈荣	全髋关节置换术
1150	D07儿童骨科、骨盆外科	2020-03-26	2020-03-29	2963634	陈亮	男	4Y	肱骨髁上骨折		治愈	张敬东	易先宏	毛诚晃	肱骨骨折闭合复位术
1151	D07儿童骨科、骨盆外科	2020-03-23	2020-03-29	2963696	胡鹏	男	10Y	胸椎骨折	骨质疏松;肾病综合征	好转	张敬东	李玉安	李玉安
1152	D07儿童骨科、骨盆外科	2020-03-21	2020-03-30	2963818	陈美琳	女	14Y	髌骨骨折		治愈	张敬东	易先宏	毛诚晃	髌骨骨折切开复位术
1153	D07儿童骨科、骨盆外科	2020-03-23	2020-03-30	2963819	潘浩龙	男	17Y	内踝骨折	腓骨骨折;高尿酸血症	治愈	孔建中	王鉴顺	柯陈荣	腓骨骨折切开复位术;踝关节融合术
1154	D07儿童骨科、骨盆外科	2020-03-22	2020-03-30	2963825	林宗湖	男	50Y	桡骨骨折		治愈	翁益民	翁益民	翁益民	桡骨骨折切开复位术
1155	D07儿童骨科、骨盆外科	2020-03-17	2020-03-30	2963831	林勤云	男	33Y	桡骨骨折		治愈	翁益民	翁益民	翁益民	桡骨骨折切开复位术
1156	D07儿童骨科、骨盆外科	2020-03-21	2020-03-30	2963837	侯浩晖	男	11Y	肱骨髁间骨折	桡骨颈骨折	治愈	张敬东	易先宏	毛诚晃	桡骨骨折切开复位术
1157	D07儿童骨科、骨盆外科	2020-03-13	2020-03-30	2963853	夏文希	男	31Y	髋臼骨折	鼻骨骨折;前列腺结石;牙根滞留;肌腱和肌肉损伤;髋关节脱位;髌骨骨折;股骨粗隆间骨折;腰椎骨折	治愈	孔建中	王鉴顺	柯陈荣	股骨骨折切开复位术;髋骨骨折切开复位钢板内固定术;髋关节脱位切开复位术
1158	D07儿童骨科、骨盆外科	2020-03-26	2020-03-30	2963863	戚安众	男	6Y	锁骨骨折	外踝骨折	治愈	张敬东	易先宏	毛诚晃
1159	D07儿童骨科、骨盆外科	2020-03-23	2020-03-30	2963864	董张应	男	17Y	取除骨折内固定装置		其他	翁益民	翁益民	翁益民	胫骨内固定物取出术
1160	D07儿童骨科、骨盆外科	2020-03-28	2020-03-30	2963898	郑紫佃	女	26Y	取除骨折内固定装置		其他	孔建中	王鉴顺	柯陈荣	踝关节内固定物取出术
1161	D07儿童骨科、骨盆外科	2020-03-29	2020-03-30	2963997	吴相平	男	8Y	胫腓骨闭合性骨折		治愈	张敬东	易先宏	毛诚晃
1162	D07儿童骨科、骨盆外科	2020-03-22	2020-03-31	2964178	方春华	女	72Y	胫骨骨折	高血压病;2型糖尿病	治愈	孔建中	王鉴顺	柯陈荣	胫骨骨折切开复位术
1163	D07儿童骨科、骨盆外科	2020-03-25	2020-03-31	2964179	陈镓豪	男	13Y	尺骨桡骨远端骨折		治愈	张敬东	易先宏	毛诚晃	桡骨骨折切开复位术
1164	D07儿童骨科、骨盆外科	2020-03-29	2020-03-31	2964281	宋瑞	男	3Y	开放性手部损伤	指骨骨折;尿道下裂	治愈	张敬东	张敬东	毛诚晃
1165	D07儿童骨科、骨盆外科	2020-03-18	2020-03-31	2964452	王秀西	女	36Y	股骨骨折	肌腱和肌肉损伤	治愈	孔建中	王鉴顺	柯陈荣	股骨骨折切开复位术
1166	D07儿童骨科、骨盆外科	2020-03-28	2020-04-01	2964478	龙湘婷	女	5Y	尺骨骨折		治愈	张敬东	易先宏	毛诚晃	尺骨骨折闭合复位术;石膏绷带固定
1167	D07儿童骨科、骨盆外科	2020-03-15	2020-04-01	2964480	林碎蕊	女	66Y	股骨粗隆下骨折	高血压病;脂肪肝;甲状腺结节;肝囊肿;多发性肋骨骨折;胆囊结石	治愈	翁益民	翁益民	翁益民	肱骨骨折闭合复位术
1168	D07儿童骨科、骨盆外科	2020-03-14	2020-04-01	2964538	谢春兰	女	53Y	骨折内固定物植入感染		治愈	孔建中	孔建中	王鉴顺	跟骨内固定物取出术;皮肤和皮下组织脓肿抽吸术
1169	D07儿童骨科、骨盆外科	2020-03-23	2020-04-01	2964540	黄碎兰	女	56Y	髌骨骨折	股四头肌腱断裂	治愈	孔建中	孔建中	王鉴顺	下肢肌腱缝合术;髌骨骨折切开复位术
1170	D07儿童骨科、骨盆外科	2020-03-28	2020-04-01	2964541	王明哲	男	3Y	取除骨折内固定装置		其他	张敬东	方明桥	王伟	股骨内固定物取出术
1171	D07儿童骨科、骨盆外科	2020-03-28	2020-04-01	2964542	胡会明	男	12Y	桡骨上端骨折		治愈	张敬东	易先宏	毛诚晃	桡骨骨折闭合复位术
1172	D07儿童骨科、骨盆外科	2020-03-12	2020-04-01	2964715	郑明栋	男	79Y	股骨粗隆间骨折	2型糖尿病;肝恶性细胞瘤;腹水;前列腺结石;下肢静脉血栓形成;低钾血症;膀胱恶性肿瘤;胰腺恶性肿瘤;单纯性肾囊肿;下肢动脉粥样硬化;高血压病	治愈	孔建中	孔建中	柯陈荣	股骨骨折闭合复位术
1173	D07儿童骨科、骨盆外科	2020-03-14	2020-04-02	2964932	刘奕彤	女	5Y	肱骨髁上骨折	中度贫血	治愈	张敬东	易先宏	毛诚晃	股骨骨折切开复位术
1174	D07儿童骨科、骨盆外科	2020-03-28	2020-04-02	2964942	曾鑫鑫	女	6Y	桡骨颈骨折		治愈	张敬东	易先宏	毛诚晃	桡骨骨折切开复位术
1175	D07儿童骨科、骨盆外科	2020-03-31	2020-04-03	2965158	李子龙	男	3Y	取除骨折内固定装置		其他	张敬东	易先宏	毛诚晃	股骨内固定物取出术
1176	D07儿童骨科、骨盆外科	2020-03-30	2020-04-03	2965190	谢琳萱	女	3Y	取除骨折内固定装置		其他	张敬东	易先宏	毛诚晃	股骨内固定物取出术
1177	D07儿童骨科、骨盆外科	2020-03-29	2020-04-03	2965191	张翊晨	男	3Y	取除骨折内固定装置		其他	张敬东	易先宏	毛诚晃	股骨内固定物取出术
1178	D07儿童骨科、骨盆外科	2020-03-31	2020-04-03	2965198	周雯晗	女	4Y	开放性足损伤	特指趾骨骨折	治愈	张敬东	易先宏	毛诚晃	皮肤和皮下坏死组织切除清创术
1179	D07儿童骨科、骨盆外科	2020-03-29	2020-04-03	2965199	黄进峰	男	8Y	桡骨颈骨折		治愈	张敬东	易先宏	毛诚晃	桡骨骨折切开复位术
1180	D07儿童骨科、骨盆外科	2020-03-31	2020-04-04	2965311	伍延坤	男	9Y	桡骨颈骨折		治愈	张敬东	易先宏	毛诚晃	桡骨骨折切开复位术
1181	D07儿童骨科、骨盆外科	2020-03-28	2020-04-04	2965313	杨炜玲	女	2Y	肱骨髁上骨折	桡骨上端骨折;头皮挫伤	治愈	张敬东	易先宏	毛诚晃	肱骨骨折切开复位术
1182	D07儿童骨科、骨盆外科	2020-03-29	2020-04-05	2965472	周银丹	女	77Y	肱骨颈骨折		治愈	孔建中	孔建中	王鉴顺	肱骨骨折切开复位术
1183	D07儿童骨科、骨盆外科	2020-03-23	2020-04-05	2965475	陈传伦	男	40Y	股骨粗隆间骨折	多发性损伤;内踝骨折	治愈	孔建中	孔建中	王鉴顺	股骨骨折切开复位术;踝关节骨折切开复位术
1184	D07儿童骨科、骨盆外科	2020-03-17	2020-04-05	2965528	项春梅	女	40Y	胫骨骨折	肝囊肿	治愈	翁益民	翁益民	翁益民	胫骨骨折切开复位术
1185	D07儿童骨科、骨盆外科	2020-03-15	2020-04-05	2965531	王玉招	女	75Y	跟骨骨折		治愈	孔建中	孔建中	柯陈荣	跟骨骨折切开复位术
1186	D07儿童骨科、骨盆外科	2020-03-30	2020-04-05	2965562	钱先烨	男	6Y	骨折内固定装置障碍	取除骨折内固定装置	治愈	张敬东	易先宏	毛诚晃	尺骨内固定物取出术
1187	D07儿童骨科、骨盆外科	2020-03-29	2020-04-05	2965571	郑元欢	男	9Y	锁骨骨折		治愈	张敬东	易先宏	王伟	锁骨骨折切开复位术
1188	D07儿童骨科、骨盆外科	2020-03-24	2020-04-05	2965700	黄小飞	女	57Y	内踝骨折	外踝骨折;人工髋关节	治愈	余可和	余可和	余可和	踝关节骨折切开复位术
1189	D07儿童骨科、骨盆外科	2020-03-26	2020-04-06	2965909	叶大利	男	81Y	股骨粗隆间骨折	胆囊结石;高血压病;脂肪肝;前列腺结石;前列腺增生;单纯性肾囊肿	治愈	翁益民	翁益民	翁益民	股骨骨折切开复位术
1190	D07儿童骨科、骨盆外科	2020-04-01	2020-04-06	2965912	于晨昊	男	3Y	髂骨骨折		治愈	张敬东	易先宏	毛诚晃
1191	D07儿童骨科、骨盆外科	2020-03-31	2020-04-06	2965914	郑棉昆	男	67Y	胫骨骨折	膝关节十字韧带劳损;半月板损伤;膝关节积液;陈旧性股骨颈骨折;腓骨骨折;腰椎骨折	好转	孔建中	孔建中	柯陈荣
1192	D07儿童骨科、骨盆外科	2020-04-01	2020-04-06	2965924	叶炯广	男	6Y	尺骨骨折		治愈	张敬东	易先宏	毛诚晃	尺骨骨折切开复位术
1193	D07儿童骨科、骨盆外科	2020-03-17	2020-04-06	2965925	林定州	男	62Y	胫骨骨折	外踝骨折;内踝骨折;前列腺增生;腓骨骨折	治愈	翁益民	翁益民	翁益民	踝关节骨折切开复位术
1194	D07儿童骨科、骨盆外科	2020-03-31	2020-04-07	2966179	黄雷	男	5Y	股骨粗隆间骨折		治愈	张敬东	易先宏	毛诚晃	股骨骨折切开复位术
1195	D07儿童骨科、骨盆外科	2020-03-27	2020-04-07	2966255	潘子豪	男	1Y	胫骨骨折	肺水肿;肾结石	治愈	张敬东	易先宏	毛诚晃	胫骨骨折切开复位术
1196	D07儿童骨科、骨盆外科	2020-04-03	2020-04-08	2966515	陈明辉	男	1Y	肱骨下端骨折		治愈	张敬东	易先宏	毛诚晃	肱骨骨骺分离闭合复位术
1197	D07儿童骨科、骨盆外科	2020-04-04	2020-04-08	2966518	李怡佳	女	7Y	肱骨髁上骨折	神经损伤	治愈	张敬东	易先宏	毛诚晃	肱骨骨折闭合复位术
1198	D07儿童骨科、骨盆外科	2020-03-26	2020-04-08	2966521	柯漫漫	女	14Y	尺骨桡骨闭合性骨折	鼻骨骨折;肌腱和肌肉损伤;膝关节副韧带扭伤	治愈	张敬东	易先宏	毛诚晃	桡骨骨折闭合复位术
1199	D07儿童骨科、骨盆外科	2020-04-04	2020-04-08	2966524	徐喆	男	4Y	肱骨外髁骨折		治愈	张敬东	易先宏	毛诚晃	肱骨骨折切开复位术
1200	D07儿童骨科、骨盆外科	2020-03-31	2020-04-08	2966528	苏陈曦	女	3Y	胫腓骨闭合性骨折	胃气胀;头皮挫伤;跟骨骨折;肺炎	好转	张敬东	易先宏	毛诚晃
1201	D07儿童骨科、骨盆外科	2020-04-04	2020-04-08	2966538	朱守政	男	8Y	肱骨髁上骨折		治愈	张敬东	易先宏	毛诚晃	肱骨骨折闭合复位术
1202	D07儿童骨科、骨盆外科	2020-04-05	2020-04-08	2966540	何鸿涛	男	6Y	尺骨骨折		治愈	张敬东	易先宏	毛诚晃	尺骨骨折闭合复位术;石膏绷带固定
1203	D07儿童骨科、骨盆外科	2020-04-01	2020-04-08	2966554	谢选强	男	55Y	桡骨骨折	高血压病;单纯性肾囊肿;乙型病毒性肝炎	治愈	孔建中	王鉴顺	柯陈荣	桡骨骨折切开复位术
1204	D07儿童骨科、骨盆外科	2020-04-05	2020-04-08	2966557	暨强豪	男	5Y	取除骨折内固定装置		其他	张敬东	易先宏	方明桥	胫骨内固定物取出术
1205	D07儿童骨科、骨盆外科	2020-04-02	2020-04-08	2966569	陈海昆	男	33Y	锁骨骨折	淋巴结增大;颈部软组织感染	治愈	翁益民	翁益民	翁益民	锁骨骨折切开复位术
1206	D07儿童骨科、骨盆外科	2020-04-01	2020-04-09	2966970	杨廷兰	女	64Y	髌骨骨折	高血压病;脂肪肝	治愈	翁益民	翁益民	翁益民	髌骨骨折切开复位术
1207	D07儿童骨科、骨盆外科	2020-04-04	2020-04-09	2966989	陈浩明	男	7Y	肱骨髁上骨折		治愈	张敬东	易先宏	毛诚晃	肱骨骨折切开复位术
1208	D07儿童骨科、骨盆外科	2020-04-02	2020-04-09	2967025	项敬恒	男	6Y	股骨干骨折		治愈	孔建中	王鉴顺	柯陈荣	股骨骨折闭合复位术;石膏绷带固定
1209	D07儿童骨科、骨盆外科	2020-04-03	2020-04-11	2967226	谢修杰	男	56Y	锁骨骨折		治愈	孔建中	王鉴顺	柯陈荣	锁骨骨折切开复位术
1210	D07儿童骨科、骨盆外科	2020-03-26	2020-04-11	2967251	印世雄	男	52Y	髌骨骨折		治愈	翁益民	翁益民	翁益民	髌骨骨折切开复位术
1211	D07儿童骨科、骨盆外科	2020-04-06	2020-04-11	2967261	潘齐泽	男	11Y	尺骨桡骨闭合性骨折		治愈	张敬东	易先宏	毛诚晃	尺骨骨折闭合复位术
1212	D07儿童骨科、骨盆外科	2020-04-06	2020-04-11	2967274	叶笑媚	女	61Y	取除骨折内固定装置	髋关节病;陈旧性肋骨骨折;股骨头无菌性坏死	其他	孔建中	王鉴顺	柯陈荣	髋关节内固定物取出术
1213	D07儿童骨科、骨盆外科	2020-04-01	2020-04-11	2967282	万家和	男	12Y	胫腓骨干骨折		治愈	张敬东	易先宏	毛诚晃	胫骨骨折切开复位术
1214	D07儿童骨科、骨盆外科	2020-04-01	2020-04-11	2967286	金昌光	男	62Y	肱骨骨折	指关节僵硬;前列腺结石;前列腺增生	治愈	孔建中	王鉴顺	柯陈荣	肱骨骨折切开复位术
1215	D07儿童骨科、骨盆外科	2020-03-31	2020-04-11	2967433	余可欣	女	5Y	多发性损伤	眼睑挫伤;头皮挫伤;胫骨骨折;腓骨骨折;锁骨骨折	治愈	张敬东	易先宏	毛诚晃	胫骨骨折切开复位术;腓骨骨折切开复位术
1216	D07儿童骨科、骨盆外科	2020-04-06	2020-04-12	2967598	夏克生	男	47Y	取除骨折内固定装置		其他	孔建中	王鉴顺	柯陈荣	髌骨内固定物取出术;胫骨内固定物取出术
1217	D07儿童骨科、骨盆外科	2020-03-26	2020-04-12	2967600	严佳阳	男	8Y	开放性胫腓骨干骨折		治愈	张敬东	易先宏	毛诚晃	皮肤和皮下坏死组织切除清创术;胫骨骨折切开复位术
1218	D07儿童骨科、骨盆外科	2020-04-01	2020-04-12	2967603	杨莲芽	女	76Y	股骨颈骨折	高血压病;桡骨上端骨折;单纯性肾囊肿;脂肪肝	治愈	孔建中	王鉴顺	柯陈荣	髋关节滑膜切除术;全髋关节置换术
1219	D07儿童骨科、骨盆外科	2020-04-04	2020-04-12	2967677	李明英	女	57Y	肩胛骨骨折		治愈	孔建中	王鉴顺	柯陈荣	肩胛骨折骨术
1220	D07儿童骨科、骨盆外科	2020-04-05	2020-04-12	2967680	余光亮	男	65Y	骶骨骨折	强直性脊柱炎;单纯性肾囊肿;耻骨骨折;腰椎骨折;胆管扩张	治愈	孔建中	王鉴顺	柯陈荣	骨盆骨折闭合复位术;骨盆骨折切开复位螺钉内固定术
1221	D07儿童骨科、骨盆外科	2020-04-08	2020-04-13	2968041	杨若瑶	女	4Y	取除骨折内固定装置	特指手术后状态	其他	张敬东	易先宏	毛诚晃	股骨内固定物取出术
1222	D07儿童骨科、骨盆外科	2020-04-09	2020-04-13	2968042	王杨辰	男	6Y	肱骨髁上骨折		治愈	张敬东	易先宏	毛诚晃	肱骨骨折闭合复位术
1223	D07儿童骨科、骨盆外科	2020-03-16	2020-04-13	2968051	赵钦样	男	72Y	胫骨骨折	前列腺增生;腓骨骨折;内踝骨折;软组织疾患	治愈	孔建中	王鉴顺	柯陈荣	踝关节骨折切开复位术;胫骨骨折切开复位术
1224	D07儿童骨科、骨盆外科	2020-03-22	2020-04-13	2968056	孙自肖	男	54Y	胫骨骨折	踝关节脱位;跟骨骨折;腓骨骨折;胆囊息肉	治愈	孔建中	王鉴顺	柯陈荣	腓骨骨折切开复位术;踝关节骨折切开复位术;胫骨骨骺分离闭合复位术;胫骨骨折切开复位术
1225	D07儿童骨科、骨盆外科	2020-04-11	2020-04-15	2968656	向金容	女	51Y	取除骨折内固定装置		其他	孔建中	王鉴顺	柯陈荣	肱骨内固定物取出术
1226	D07儿童骨科、骨盆外科	2020-04-11	2020-04-15	2968660	侯语晨	男	3Y	肱骨外髁骨折		治愈	张敬东	易先宏	毛诚晃	肱骨骨折闭合复位术
1227	D07儿童骨科、骨盆外科	2020-04-11	2020-04-15	2968669	余康铭	男	3Y	肱骨外髁骨折		治愈	张敬东	易先宏	毛诚晃	肱骨骨折切开复位术
1228	D07儿童骨科、骨盆外科	2020-04-05	2020-04-15	2968683	胡良妹	女	86Y	股骨颈骨折		治愈	翁益民	翁益民	翁益民	人工股骨头置换术
1229	D07儿童骨科、骨盆外科	2020-04-10	2020-04-16	2969010	陈佳慧	女	4Y	肱骨外髁骨折		治愈	张敬东	易先宏	毛诚晃	肱骨内固定物取出术
1230	D07儿童骨科、骨盆外科	2020-04-11	2020-04-16	2969107	杨安邦	男	3Y	肱骨外髁骨折		治愈	张敬东	易先宏	毛诚晃	肱骨骨折切开复位术
1231	D07儿童骨科、骨盆外科	2020-04-13	2020-04-16	2969137	陈靖皓	男	8Y	取除骨折内固定装置		其他	张敬东	易先宏	毛诚晃	肱骨内固定物取出术
1232	D07儿童骨科、骨盆外科	2020-04-13	2020-04-17	2969265	程智	男	3Y	取除骨折内固定装置		其他	张敬东	易先宏	毛诚晃	股骨内固定物取出术
1233	D07儿童骨科、骨盆外科	2020-04-11	2020-04-18	2968518	李康达	男	7Y	取除骨折内固定装置		其他	张敬东	闫广奎	王伟	尺骨内固定物取出术
1234	D07儿童骨科、骨盆外科	2020-04-12	2020-04-18	2969407	曾力薪	男	2Y	指骨骨折	手软组织疾患	治愈	张敬东	张敬东	张敬东
1235	D07儿童骨科、骨盆外科	2020-04-05	2020-04-18	2969433	潘琦	男	11Y	股骨颈骨折		治愈	张敬东	易先宏	毛诚晃	股骨骨折切开复位术
1236	D07儿童骨科、骨盆外科	2020-04-14	2020-04-18	2969469	周浩然	男	11Y	取除骨折内固定装置		其他	张敬东	易先宏	毛诚晃	尺骨内固定物取出术
1237	D07儿童骨科、骨盆外科	2020-04-10	2020-04-18	2969551	陈彬镭	男	18Y	外踝骨折		治愈	孔建中	王鉴顺	柯陈荣	踝关节骨折切开复位术
1238	D07儿童骨科、骨盆外科	2020-04-09	2020-04-18	2969561	吴贝贝	女	3Y	股骨干骨折		治愈	张敬东	易先宏	毛诚晃	股骨骨折切开复位术
1239	D07儿童骨科、骨盆外科	2020-04-02	2020-04-18	2969563	徐金莲	女	61Y	胫骨骨折	半月板损伤;2型糖尿病;头皮血肿;面部挫伤;锁骨骨折;肺水肿;高血压病	治愈	孔建中	王鉴顺	柯陈荣	膝关节半月板成形术;胫骨植骨术;胫骨骨折切开复位术
1240	D07儿童骨科、骨盆外科	2020-04-01	2020-04-18	2969566	朱治德	男	49Y	胫骨骨折	腓骨骨折;脂肪肝	治愈	翁益民	翁益民	翁益民	胫骨骨折切开复位术
1241	D07儿童骨科、骨盆外科	2020-04-13	2020-04-18	2969570	张晶	女	61Y	肱骨骨折	单纯性肾囊肿;肾结石;冠状动脉粥样硬化	治愈	翁益民	翁益民	翁益民	肱骨骨折切开复位术
1242	D07儿童骨科、骨盆外科	2020-04-11	2020-04-18	2969574	林小花	女	69Y	桡骨下端骨折		治愈	孔建中	王鉴顺	柯陈荣	桡骨骨折闭合复位术;石膏绷带固定
1243	D07儿童骨科、骨盆外科	2020-04-06	2020-04-18	2969587	陶文松	男	40Y	跟骨骨折		治愈	翁益民	翁益民	翁益民	跟骨骨折切开复位术
1244	D07儿童骨科、骨盆外科	2020-04-12	2020-04-18	2969590	杨文涛	男	60Y	股骨粗隆间骨折	高血压病;2型糖尿病	治愈	孔建中	王鉴顺	柯陈荣	股骨骨折闭合复位术
1245	D07儿童骨科、骨盆外科	2020-04-08	2020-04-18	2969606	蔡小冬	女	60Y	肱骨外科颈骨折	肝囊肿	治愈	翁益民	翁益民	翁益民	肱骨骨折切开复位术
1246	D07儿童骨科、骨盆外科	2020-04-13	2020-04-18	2969810	郑绵昆	男	67Y	胫骨骨折	膝关节十字韧带扭伤;膝关节副韧带扭伤;半月板损伤;膝关节积液;陈旧性股骨颈骨折;腓骨骨折;腰椎骨折	好转	孔建中	王鉴顺	柯陈荣
1247	D07儿童骨科、骨盆外科	2020-04-08	2020-04-19	2969936	董婷	女	5Y	跖骨骨折		治愈	张敬东	易先宏	毛诚晃	跖骨骨折切开复位术
1248	D07儿童骨科、骨盆外科	2020-03-01	2020-04-19	2969952	彭翰林	男	11Y	开放性胫骨骨折	下肢皮肤套脱伤;开放性腓骨骨折	治愈	张敬东	易先宏	毛诚晃	踝关节内固定物取出术;皮肤及皮下组织清创术;皮肤和皮下组织血肿抽吸术;腓骨骨折切开复位术;胫骨骨折切开复位术;指皮肤游离移植术
1249	D07儿童骨科、骨盆外科	2020-04-03	2020-04-20	2970224	陈泯桦	女	14Y	胫骨下端骨折	腰椎骨折	好转	张敬东	易先宏	毛诚晃	胫骨骨折切开复位术
1250	D07儿童骨科、骨盆外科	2020-04-09	2020-04-20	2970227	徐林喜	男	4Y	开放性特指指骨骨折		好转	张敬东	易先宏	毛诚晃	手清创术;指骨骨折切开复位术
1251	D07儿童骨科、骨盆外科	2020-04-16	2020-04-20	2970232	冯子轩	男	3Y	取除骨折内固定装置		其他	张敬东	易先宏	毛诚晃	胫骨内固定物取出术;腓骨内固定物取出术
1252	D07儿童骨科、骨盆外科	2020-04-16	2020-04-20	2970234	梁睿凡	男	2Y	取除骨折内固定装置		其他	张敬东	易先宏	毛诚晃	股骨内固定物取出术
1253	D07儿童骨科、骨盆外科	2020-04-17	2020-04-20	2970237	刘可瑾	女	5Y	取除骨折内固定装置		其他	张敬东	易先宏	毛诚晃	胫骨内固定物取出术;腓骨内固定物取出术
1254	D07儿童骨科、骨盆外科	2020-04-01	2020-04-20	2970242	施世浩	男	16Y	下肢软组织感染	陈旧性股骨骨折;陈旧性骨盆骨折;陈旧性腰椎骨折;肾结石;泌尿道感染	治愈	孔建中	王鉴顺	柯陈荣
1255	D07儿童骨科、骨盆外科	2020-04-10	2020-04-20	2970243	郑云元	男	46Y	髌骨骨折	下肢静脉血栓形成	治愈	孔建中	王鉴顺	柯陈荣	股静脉穿刺术;下腔静脉滤器置入术;髌骨骨折切开复位术
1256	D07儿童骨科、骨盆外科	2020-04-11	2020-04-20	2970407	陈春霞	女	83Y	股骨粗隆间骨折		治愈	孔建中	王鉴顺	柯陈荣	股骨骨折闭合复位术;股骨骨折切开复位术
1257	D07儿童骨科、骨盆外科	2020-04-12	2020-04-20	2970467	陈成积	男	53Y	三踝骨折	高血压病	治愈	孔建中	王鉴顺	柯陈荣	踝关节骨折切开复位术
1258	D07儿童骨科、骨盆外科	2020-04-16	2020-04-21	2970542	姚永恒	男	7Y	股骨骨折		治愈	张敬东	易先宏	毛诚晃	股骨骨折闭合复位术
1259	D07儿童骨科、骨盆外科	2020-04-14	2020-04-22	2970939	刘羽凡	女	2Y	股骨干骨折		治愈	张敬东	易先宏	毛诚晃	股骨骨折闭合复位术
1260	D07儿童骨科、骨盆外科	2020-04-19	2020-04-22	2970942	张有余	男	8Y	取除骨折内固定装置		其他	张敬东	易先宏	方明桥	股骨骨折切开复位术
1261	D07儿童骨科、骨盆外科	2020-04-19	2020-04-22	2970953	厉浩明	男	12Y	取除骨折内固定装置		其他	张敬东	易先宏	毛诚晃	股骨内固定物取出术
1262	D07儿童骨科、骨盆外科	2020-04-19	2020-04-22	2970976	张政	男	10Y	取除骨折内固定装置		其他	张敬东	易先宏	方明桥	尺骨内固定物取出术
1263	D07儿童骨科、骨盆外科	2020-04-05	2020-04-22	2970983	张作宾	男	35Y	胫骨骨折	多发性损伤;前列腺钙化灶;小腿软组织疾患;跖骨骨折;足舟状骨骨折;跟骨骨折;腰椎骨折;肝钙化灶	治愈	翁益民	翁益民	翁益民	胫骨骨折切开复位术;跟骨骨折切开复位术
1264	D07儿童骨科、骨盆外科	2020-04-02	2020-04-22	2970996	陆杰	男	17Y	胫腓骨下端骨折	特指趾骨骨折;尺骨桡骨远端骨折;前臂多处浅表损伤;上肢皮肤裂伤	好转	孔建中	王鉴顺	柯陈荣	手清创术;尺骨骨折闭合复位术;桡骨骨折闭合复位术;胫骨骨折切开复位术;腓骨骨折切开复位术
1265	D07儿童骨科、骨盆外科	2020-04-14	2020-04-22	2971000	黄爱敏	女	38Y	胫骨骨折	腓骨骨折;骨质疏松	治愈	孔建中	王鉴顺	柯陈荣	胫骨骨折切开复位术
1266	D07儿童骨科、骨盆外科	2020-04-06	2020-04-22	2971009	胡小美	女	49Y	胫骨骨折	三踝骨折;小腿软组织疾患	治愈	翁益民	翁益民	翁益民	踝关节骨折切开复位术;胫骨内固定物取出术
1267	D07儿童骨科、骨盆外科	2020-04-19	2020-04-23	2971332	姜爱娣	女	63Y	取除骨折内固定装置	肝囊肿	其他	翁益民	翁益民	翁益民	尺骨内固定物取出术
1268	D07儿童骨科、骨盆外科	2020-04-19	2020-04-23	2971334	高修仁	男	58Y	取除骨折内固定装置		其他	翁益民	翁益民	翁益民	锁骨内固定物取出术
1269	D07儿童骨科、骨盆外科	2020-04-05	2020-04-25	2971679	倪华妹	女	55Y	闭合性胫骨平台骨折	膝关节十字韧带扭伤;膝关节副韧带扭伤;胫骨骨干骨折;半月板损伤;骰骨骨折;距骨骨折;腓骨骨折;肝囊肿	治愈	翁益民	翁益民	翁益民	胫骨骨折切开复位术
1270	D07儿童骨科、骨盆外科	2020-04-21	2020-04-25	2971683	赵燕菊	女	5Y	股骨干骨折		治愈	张敬东	易先宏	王伟	股骨骨折切开复位术
1271	D07儿童骨科、骨盆外科	2020-04-21	2020-04-25	2971695	汤瑶君	男	2Y	肱骨外髁骨折		治愈	张敬东	易先宏	毛诚晃	肱骨骨折闭合复位术
1272	D07儿童骨科、骨盆外科	2020-04-20	2020-04-25	2971708	蒋雨倩	女	4Y	肱骨髁上骨折		治愈	张敬东	易先宏	闫广奎	肱骨骨折闭合复位术
1273	D07儿童骨科、骨盆外科	2020-04-20	2020-04-25	2971730	沈美玲	女	24Y	取除骨折内固定装置		其他	翁益民	翁益民	翁益民	跖骨内固定物取出术
1274	D07儿童骨科、骨盆外科	2020-04-18	2020-04-25	2971744	戴子翔	男	14Y	鹰嘴骨折		治愈	孔建中	王鉴顺	柯陈荣	尺骨骨折切开复位术
1275	D07儿童骨科、骨盆外科	2020-04-20	2020-04-25	2971768	王凯越	男	4Y	肱骨髁上骨折		治愈	张敬东	易先宏	毛诚晃	肱骨骨折闭合复位术
1276	D07儿童骨科、骨盆外科	2020-04-15	2020-04-25	2971771	潘熠帆	男	7Y	胫骨骨干骨折		治愈	张敬东	易先宏	毛诚晃	胫骨骨折闭合复位术
1277	D07儿童骨科、骨盆外科	2020-04-20	2020-04-25	2971777	彭诗颖	女	3Y	骨折治疗后随诊检查	特指手术后状态	其他	张敬东	易先宏	毛诚晃
1278	D07儿童骨科、骨盆外科	2020-04-18	2020-04-25	2971790	齐三勇	男	33Y	闭合性胫骨平台骨折		治愈	孔建中	王鉴顺	柯陈荣	胫骨骨折切开复位术;膝关节半月板成形术
1279	D07儿童骨科、骨盆外科	2020-04-13	2020-04-25	2971801	金全香	女	64Y	踝关节脱位	骨盆骨折;腰椎骨折;胆囊息肉;肝囊肿;陈旧性肺结核	治愈	孔建中	王鉴顺	柯陈荣	踝关节骨折切开复位术
1280	D07儿童骨科、骨盆外科	2020-04-21	2020-04-26	2972061	齐祥浡	男	6Y	肱骨髁上骨折		治愈	张敬东	易先宏	李玉安	肱骨骨折切开复位术
1281	D07儿童骨科、骨盆外科	2020-04-16	2020-04-26	2972091	吴皓轩	男	7Y	胫腓骨闭合性骨折		治愈	张敬东	易先宏	毛诚晃
1282	D07儿童骨科、骨盆外科	2020-04-16	2020-04-26	2972092	习贝琪	男	7Y	股骨粗隆下骨折		治愈	张敬东	易先宏	王伟	股骨骨折闭合复位术
1283	D07儿童骨科、骨盆外科	2020-04-22	2020-04-27	2972483	胡婉琪	女	4Y	取除骨折内固定装置		其他	张敬东	易先宏	闫广奎	肱骨内固定物取出术
1284	D07儿童骨科、骨盆外科	2020-04-22	2020-04-27	2972485	杨杰	男	2Y	取除骨折内固定装置		其他	张敬东	易先宏	闫广奎	股骨内固定物取出术
1285	D07儿童骨科、骨盆外科	2020-04-23	2020-04-27	2972497	李士泽	男	5Y	肱骨髁上骨折		治愈	张敬东	易先宏	毛诚晃	肱骨骨折闭合复位术
1286	D07儿童骨科、骨盆外科	2020-04-11	2020-04-27	2972535	董秀朋	男	46Y	胫骨下端骨折	胫骨骨干骨折;跟骨骨折;内踝骨折	治愈	孔建中	王鉴顺	柯陈荣	胫骨骨折切开复位术;踝关节骨折切开复位术;外固定架固定
1287	D07儿童骨科、骨盆外科	2020-04-14	2020-04-27	2972540	赵静	男	45Y	肩胛骨骨折	髂骨骨折;肋骨骨折;胸腔积液	治愈	孔建中	王鉴顺	柯陈荣	肩胛骨骨折切开复位钢板内固定术
1288	D07儿童骨科、骨盆外科	2020-04-16	2020-04-27	2972548	祁一城	男	6Y	股骨干骨折	肱骨外髁骨折;皮肤挫伤	治愈	张敬东	易先宏	毛诚晃	股骨骨折切开复位术
1289	D07儿童骨科、骨盆外科	2020-04-17	2020-04-27	2972559	王梓涵	男	4Y	股骨干骨折		治愈	翁益民	翁益民	翁益民	股骨骨折切开复位术
1290	D07儿童骨科、骨盆外科	2020-04-16	2020-04-27	2972561	叶玲玉	女	74Y	肱骨外科颈骨折	高血压病;单纯性肾囊肿	治愈	翁益民	翁益民	翁益民	肱骨骨折切开复位术
1291	D07儿童骨科、骨盆外科	2020-04-19	2020-04-27	2972566	钱春媚	女	77Y	股骨粗隆间骨折	2型糖尿病;支气管扩张;下肢静脉炎和血栓性静脉炎;肺部感染;股骨粗隆下骨折	治愈	孔建中	王鉴顺	柯陈荣	股骨骨折切开复位术
1292	D07儿童骨科、骨盆外科	2020-04-21	2020-04-28	2972803	王子阳	男	8Y	肱骨外髁骨折		好转	张敬东	易先宏	毛诚晃	肱骨骨折切开复位术
1293	D07儿童骨科、骨盆外科	2020-04-25	2020-04-28	2972817	陆慧栩	女	3Y	取除骨折内固定装置		其他	张敬东	易先宏	毛诚晃	肱骨内固定物取出术
1294	D07儿童骨科、骨盆外科	2020-04-11	2020-04-28	2972821	曾鑫鑫	女	6Y	创伤后伤口感染	陈旧性桡骨骨折	治愈	张敬东	易先宏	毛诚晃
1295	D07儿童骨科、骨盆外科	2020-04-25	2020-04-28	2972830	黄雪莉	女	4Y	取除骨折内固定装置		其他	张敬东	易先宏	毛诚晃	股骨内固定物取出术
1296	D07儿童骨科、骨盆外科	2020-04-27	2020-04-28	2972950	章家豪	男	12Y	肱骨髁上骨折	神经损伤	未愈	张敬东	毛诚晃	闫广奎
1297	D07儿童骨科、骨盆外科	2020-04-25	2020-04-29	2973063	邱锦鑫	男	3Y	股骨骨折	颅骨骨折;脑挫伤;肺挫伤;硬膜下出血;胎盘血肿	治愈	张敬东	易先宏	毛诚晃
1298	D07儿童骨科、骨盆外科	2020-04-22	2020-04-29	2973082	姜澳楠	男	16Y	肱骨髁上骨折	桡骨颈骨折	治愈	张敬东	易先宏	毛诚晃	桡骨骨折闭合复位术;肱骨骨折切开复位术
1299	D07儿童骨科、骨盆外科	2020-04-22	2020-04-29	2973083	谷明乐	男	9Y	锁骨骨折		治愈	张敬东	易先宏	毛诚晃	锁骨骨折切开复位术
1300	D07儿童骨科、骨盆外科	2020-04-22	2020-04-29	2973085	陈锦杰	男	12Y	桡骨下端骨折		治愈	张敬东	易先宏	毛诚晃	桡骨骨折切开复位术
1301	D07儿童骨科、骨盆外科	2020-04-19	2020-04-29	2973117	周玉莲	女	70Y	股骨颈骨折	斜颈;2型糖尿病;高血压病	治愈	孔建中	王鉴顺	柯陈荣	髋关节滑膜切除术;全髋关节置换术
1302	D07儿童骨科、骨盆外科	2020-04-26	2020-04-29	2973118	程晨	女	3Y	胫腓骨下端骨折		治愈	张敬东	易先宏	毛诚晃
1303	D07儿童骨科、骨盆外科	2020-04-25	2020-04-29	2973144	余涛	男	11Y	取除骨折内固定装置		其他	张敬东	易先宏	毛诚晃	髌骨内固定物取出术
1304	D07儿童骨科、骨盆外科	2020-04-01	2020-04-29	2973384	陈龙	男	27Y	肱骨干骨折	髋关节脱位;肺水肿;桡神经损害;特指手术后状态;胫骨骨干骨折	治愈	孔建中	王鉴顺	柯陈荣	肱骨骨折切开复位术;皮肤和皮下组织脓肿抽吸术;髋关节脱位闭合复位术;胫骨骨折闭合复位术
1305	D07儿童骨科、骨盆外科	2020-04-23	2020-04-29	2973471	汪灵晨	女	8Y	病理性骨折	骨纤维异样增殖症	好转	张敬东	易先宏	闫广奎
1306	D07儿童骨科、骨盆外科	2020-04-27	2020-04-30	2973722	陈浩明	男	7Y	肱骨髁上骨折	骨折内固定术后疼痛	治愈	张敬东	易先宏	毛诚晃	肱骨内固定物取出术;肱骨骨折切开复位术
1307	D07儿童骨科、骨盆外科	2020-04-28	2020-04-30	2973724	薛培翊	男	1Y	肱骨髁上骨折		治愈	张敬东	易先宏	毛诚晃	肱骨骨折闭合复位术
1308	D07儿童骨科、骨盆外科	2020-04-27	2020-04-30	2973728	关萍	女	7Y	肱骨髁上骨折		治愈	张敬东	王伟	毛诚晃	肱骨骨折闭合复位术
1309	D07儿童骨科、骨盆外科	2020-04-25	2020-04-30	2973733	林欢洁	女	6Y	取除骨折内固定装置	先天性髋关节脱位	其他	张敬东	易先宏	毛诚晃	瘢痕松解术;髋关节内固定物取出术
1310	D07儿童骨科、骨盆外科	2020-04-28	2020-04-30	2973831	罗杰	男	11Y	肱骨髁上骨折		治愈	张敬东	易先宏	毛诚晃	肱骨骨折闭合复位术
1311	D07儿童骨科、骨盆外科	2020-04-20	2020-05-01	2973840	孟召福	男	54Y	股四头肌腱断裂	股骨下端骨折;膝关节副韧带扭伤	治愈	余可和	余可和	余可和	皮肤和皮下坏死组织切除清创术;皮肤和皮下组织脓肿抽吸术
1312	D07儿童骨科、骨盆外科	2020-04-26	2020-05-01	2973874	李双清	男	41Y	取除骨折内固定装置	血管瘤	其他	孔建中	王鉴顺	柯陈荣	锁骨内固定物取出术
1313	D07儿童骨科、骨盆外科	2020-04-26	2020-05-01	2973905	倪春飞	男	39Y	内踝骨折		治愈	孔建中	王鉴顺	柯陈荣	踝关节骨折切开复位术
1314	D07儿童骨科、骨盆外科	2020-04-27	2020-05-02	2973975	章淑璟	女	1Y	肱骨髁上骨折		治愈	张敬东	易先宏	毛诚晃	肱骨骨折闭合复位术
1315	D07儿童骨科、骨盆外科	2020-04-28	2020-05-02	2974021	薛杰怀	男	13Y	取除骨折内固定装置		其他	张敬东	易先宏	毛诚晃	桡骨内固定物取出术
1316	D07儿童骨科、骨盆外科	2020-04-23	2020-05-03	2973876	黄燕华	男	45Y	髌骨脱位	膝关节十字韧带扭伤;内侧半月板后脚损伤;膝关节积液;膝挫伤;皮肤挫伤;腓骨骨折	治愈	孔建中	王鉴顺	柯陈荣	髌骨骨折闭合复位术
1317	D07儿童骨科、骨盆外科	2020-04-27	2020-05-03	2974209	秦桃林	女	30Y	取除骨折内固定装置	肾结石	其他	翁益民	翁益民	翁益民	踝关节内固定物取出术
1318	D07儿童骨科、骨盆外科	2020-04-27	2020-05-03	2974212	陈清清	女	26Y	取除骨折内固定装置	肾肿物	其他	翁益民	翁益民	翁益民	锁骨内固定物取出术
1319	D07儿童骨科、骨盆外科	2020-04-21	2020-05-03	2974213	谷定海	男	56Y	肱骨外科颈骨折		治愈	孔建中	王鉴顺	柯陈荣	肱骨骨折切开复位术
1320	D07儿童骨科、骨盆外科	2020-04-28	2020-05-03	2974218	张俊杰	男	11Y	肱骨外科颈骨折		治愈	张敬东	张敬东	李玉安	肱骨骨折闭合复位术
1321	D07儿童骨科、骨盆外科	2020-04-27	2020-05-03	2974222	杨孔智	男	67Y	取除骨折内固定装置	高血压病	其他	翁益民	翁益民	翁益民	髌骨内固定物取出术
1322	D07儿童骨科、骨盆外科	2020-04-21	2020-05-03	2974228	李翠玲	女	46Y	髌骨骨折	肾结石;外踝骨折;内踝骨折;股骨骨折;股四头肌腱断裂;骨折治疗后恢复期	治愈	孔建中	王鉴顺	柯陈荣	股四头肌成形术;股骨骨折切开复位术;髌骨骨折切开复位术;踝关节骨折切开复位术
1323	D07儿童骨科、骨盆外科	2020-04-22	2020-05-03	2974237	陈弟妹	女	70Y	开放性胫骨骨干骨折		治愈	孔建中	王鉴顺	柯陈荣	胫骨外固定术;胫骨骨折切开复位术
1324	D07儿童骨科、骨盆外科	2020-04-28	2020-05-03	2974239	章涵宇	男	3Y	胫腓骨下端骨折		治愈	张敬东	易先宏	毛诚晃	胫骨骨折闭合复位术
1325	D07儿童骨科、骨盆外科	2020-04-04	2020-05-03	2974251	叶苗准	男	53Y	胫骨下端骨折	皮肤挫伤	治愈	翁益民	翁益民	翁益民	胫骨骨折切开复位术
1326	D07儿童骨科、骨盆外科	2020-04-17	2020-05-03	2974258	付臣林	男	55Y	闭合性胫骨平台骨折	前列腺增生;高血压病;膝韧带松弛;膝关节十字韧带扭伤;膝外侧半月板损伤;胫腓骨闭合性骨折;股骨骨折	治愈	翁益民	翁益民	翁益民	胫骨骨折切开复位术
1327	D07儿童骨科、骨盆外科	2020-04-30	2020-05-03	2974267	陆志鹏	男	8Y	肱骨髁上骨折		治愈	张敬东	易先宏	毛诚晃	肱骨骨折闭合复位术
1328	D07儿童骨科、骨盆外科	2020-04-27	2020-05-03	2974272	周衍成	男	59Y	股骨头无菌性坏死	脂肪肝;肾积水伴肾结石;陈旧性股骨颈骨折;前列腺结石	治愈	孔建中	王鉴顺	柯陈荣	股骨内固定物取出术;髋关节滑膜切除术;全髋关节置换术
1329	D07儿童骨科、骨盆外科	2020-04-28	2020-05-03	2974310	夏建忠	男	50Y	取除骨折内固定装置	前列腺结石;脂肪肝	其他	孔建中	王鉴顺	柯陈荣	胫骨内固定物取出术;肱骨内固定物取出术
1330	D07儿童骨科、骨盆外科	2020-04-28	2020-05-04	2974636	吴星怡	女	15Y	肱骨下端骨折		治愈	张敬东	易先宏	方明桥	肱骨骨折闭合复位术
1331	D07儿童骨科、骨盆外科	2020-04-22	2020-05-04	2974642	陈启翁	男	77Y	股骨颈骨折		治愈	孔建中	王鉴顺	柯陈荣	髋关节滑膜切除术;全髋关节置换术
1332	D07儿童骨科、骨盆外科	2020-04-02	2020-05-04	2974649	韩清华	男	39Y	胫腓骨下端骨折	距骨骨折;下肢皮肤感染;跟骨骨折	治愈	孔建中	王鉴顺	柯陈荣	皮肤和皮下组织脓肿抽吸术;距骨骨折切开复位螺钉内固定术;胫骨骨折切开复位术;皮肤和皮下坏死组织切除清创术;踝关节骨折切开复位术;距下关节融合术
1333	D07儿童骨科、骨盆外科	2020-04-22	2020-05-04	2974748	陈伍德	男	39Y	开放性胫骨骨折	胫骨骨折;跟骨骨折;内踝骨折;腰椎骨折	治愈	孔建中	王鉴顺	柯陈荣	踝关节骨折切开复位术;外固定架固定;胫骨骨折切开复位术
1334	D07儿童骨科、骨盆外科	2020-05-03	2020-05-04	2974806	孙传生	男	36Y	髌骨骨折		治愈	孔建中	王鉴顺	柯陈荣
1335	D07儿童骨科、骨盆外科	2020-04-24	2020-05-05	2974946	沈律呈	男	6Y	股骨干骨折	胫腓骨下端骨折;头皮挫伤	治愈	张敬东	易先宏	毛诚晃	股骨骨折闭合复位术;胫骨骨折闭合复位术;石膏绷带固定
1336	D07儿童骨科、骨盆外科	2020-04-26	2020-05-06	2975265	赵美玉	女	84Y	股骨粗隆间骨折	髌骨骨折;高血压病;冠状动脉粥样硬化性心脏病	治愈	翁益民	翁益民	翁益民	股骨骨折闭合复位术
1337	D07儿童骨科、骨盆外科	2020-04-16	2020-05-06	2975269	黄苏华	女	45Y	股骨粗隆下骨折	股骨头无菌性坏死;2型糖尿病;高血压病;肾小球肾病;特指手术后状态	治愈	孔建中	王鉴顺	王鉴顺	股骨骨折闭合复位术
1338	D07儿童骨科、骨盆外科	2020-04-21	2020-05-06	2975272	黄庆节	男	48Y	跟骨骨折	高血压病;股骨颈骨折	治愈	孔建中	王鉴顺	王鉴顺	股骨骨折切开复位术;跟骨骨折切开复位术
1339	D07儿童骨科、骨盆外科	2020-04-30	2020-05-06	2975310	柳智策	男	3Y	耻骨骨折	多处浅表损伤	好转	张敬东	易先宏	李玉安
1340	D07儿童骨科、骨盆外科	2020-04-29	2020-05-07	2975547	张雪兴	男	46Y	掌骨骨折	尿毒症	治愈	翁益民	翁益民	翁益民	掌骨骨折闭合复位术
1341	D07儿童骨科、骨盆外科	2020-05-03	2020-05-07	2975569	戴淑苗	女	17Y	桡骨下端骨折		治愈	翁益民	翁益民	翁益民	桡骨骨折闭合复位术
1342	D07儿童骨科、骨盆外科	2020-05-06	2020-05-07	2975620	钟木香	女	45Y	髌骨骨折		治愈	翁益民	翁益民	翁益民
1343	D07儿童骨科、骨盆外科	2020-05-03	2020-05-09	2975896	郑月凤	女	72Y	股骨颈骨折	高血压病;陈旧性耻骨骨折;脂肪肝	治愈	孔建中	王鉴顺	王鉴顺
1344	D07儿童骨科、骨盆外科	2020-05-03	2020-05-09	2976044	黄凌风	男	12Y	取除骨折内固定装置		其他	张敬东	易先宏	毛诚晃	肱骨内固定物取出术
1345	D07儿童骨科、骨盆外科	2020-05-07	2020-05-09	2976046	饶雯轩	女	4Y	肱骨髁上骨折		治愈	张敬东	易先宏	毛诚晃	肱骨骨折闭合复位术
1346	D07儿童骨科、骨盆外科	2020-05-03	2020-05-09	2976052	潘子翔	男	1Y	肱骨外髁骨折		治愈	张敬东	易先宏	毛诚晃	肱骨骨折切开复位术
1347	D07儿童骨科、骨盆外科	2020-04-30	2020-05-09	2976056	金依善	女	9Y	肱骨外科颈骨折	肺挫伤;头皮血肿;神经损伤	治愈	张敬东	易先宏	毛诚晃	肱骨骨折闭合复位术
1348	D07儿童骨科、骨盆外科	2020-04-21	2020-05-09	2976071	李碎眉	女	85Y	股骨颈骨折	高血压病;房性早搏	治愈	孔建中	王鉴顺	柯陈荣	全髋关节置换术;髋关节滑膜切除术
1349	D07儿童骨科、骨盆外科	2020-05-01	2020-05-09	2976077	池玉妹	女	89Y	股骨粗隆间骨折	髂骨骨折;陈旧性骨盆骨折;陈旧性耻骨骨折;髋臼骨折	治愈	孔建中	王鉴顺	柯陈荣	股骨骨折切开复位术
1350	D07儿童骨科、骨盆外科	2020-05-03	2020-05-09	2976083	叶乐萍	女	54Y	髌骨骨折		治愈	孔建中	王鉴顺	柯陈荣	髌骨骨折切开复位术;股四头肌成形术
1351	D07儿童骨科、骨盆外科	2020-05-01	2020-05-09	2976090	王福云	男	54Y	内踝骨折	脂肪肝	治愈	孔建中	王鉴顺	柯陈荣	踝关节骨折切开复位术
1352	D07儿童骨科、骨盆外科	2020-04-19	2020-05-09	2976114	杨刘顺	男	57Y	胫骨骨干骨折	胆囊息肉;脂肪肝;肺大泡;下肢皮肤套脱伤;胫腓骨下端骨折;单纯性肾囊肿;肾结石;2型糖尿病;皮肤挫伤;颧骨骨折	治愈	孔建中	王鉴顺	王鉴顺	腓骨骨折闭合复位术;皮肤和皮下组织脓肿抽吸术;胫骨骨折切开复位术
1353	D07儿童骨科、骨盆外科	2020-04-28	2020-05-09	2976176	林浩	男	13Y	肱骨髁上骨折		治愈	张敬东	易先宏	李玉安	肱骨骨折切开复位术
1354	D07儿童骨科、骨盆外科	2020-05-03	2020-05-09	2976241	许生双	男	53Y	小腿水平胫神经损伤	骨折治疗后随诊检查	好转	孔建中	王鉴顺	柯陈荣	胫神经松解术
1355	D07儿童骨科、骨盆外科	2020-05-03	2020-05-10	2976424	郭优艺	女	1Y	胫腓骨下端骨折		好转	张敬东	易先宏	毛诚晃
1356	D07儿童骨科、骨盆外科	2020-05-02	2020-05-10	2976428	谭华容	女	38Y	股骨颈骨折		治愈	孔建中	王鉴顺	柯陈荣	股骨骨折闭合复位术
1357	D07儿童骨科、骨盆外科	2020-05-03	2020-05-10	2976431	谢荣笑	女	2Y	肱骨外髁骨折	特指手术后状态	治愈	张敬东	易先宏	毛诚晃	肱骨骨折闭合复位术
1358	D07儿童骨科、骨盆外科	2020-04-30	2020-05-10	2976438	陈凤香	女	74Y	骨折不连接	高血压病;2型糖尿病;肋骨骨折	治愈	孔建中	王鉴顺	柯陈荣	肱骨内固定物取出术;人工肱骨头置换术;肩袖修补术
1359	D07儿童骨科、骨盆外科	2020-05-04	2020-05-10	2976541	王宏亮	男	7Y	肱骨髁上骨折		治愈	张敬东	易先宏	毛诚晃	肱骨骨折闭合复位术
1360	D07儿童骨科、骨盆外科	2020-05-01	2020-05-10	2976641	牛孜扬	男	2Y	肱骨骨折	胫腓骨干骨折;面部挫伤;肺挫伤	治愈	张敬东	易先宏	闫广奎
1361	D07儿童骨科、骨盆外科	2020-05-06	2020-05-11	2976750	金铭淼	男	1Y	胫腓骨闭合性骨折		治愈	张敬东	易先宏	李玉安
1362	D07儿童骨科、骨盆外科	2020-05-01	2020-05-11	2976769	叶爱香	女	74Y	胫腓骨闭合性骨折	高血压病;脂肪肝	治愈	孔建中	王鉴顺	柯陈荣	胫骨骨折切开复位术
1363	D07儿童骨科、骨盆外科	2020-05-03	2020-05-12	2977040	蔡乐意	男	14Y	取除骨折内固定装置		其他	张敬东	易先宏	毛诚晃	股骨内固定物取出术;跟骨内固定物取出术
1364	D07儿童骨科、骨盆外科	2020-04-11	2020-05-12	2977049	吴思来	男	49Y	开放性胫腓骨干骨折	肺大泡;多发性损伤	治愈	孔建中	王鉴顺	柯陈荣	皮肤和皮下坏死组织切除清创术;胫骨骨折切开复位术
1365	D07儿童骨科、骨盆外科	2020-05-05	2020-05-12	2977051	陈国梁	男	11Y	胫腓骨闭合性骨折	骨骺滑脱	治愈	张敬东	李玉安	方明桥	胫骨骨折闭合复位术
1366	D07儿童骨科、骨盆外科	2020-05-04	2020-05-12	2977161	陈伊明	女	40Y	内踝骨折	腓骨骨折	治愈	孔建中	王鉴顺	柯陈荣	踝关节骨折切开复位术
1367	D07儿童骨科、骨盆外科	2020-05-09	2020-05-13	2977405	余圣杰	男	4Y	取除骨折内固定装置		其他	张敬东	易先宏	李玉安	股骨内固定物取出术
1368	D07儿童骨科、骨盆外科	2020-05-07	2020-05-13	2977425	温小女	女	29Y	胫骨骨折		治愈	孔建中	王鉴顺	柯陈荣	胫骨骨折切开复位术
1369	D07儿童骨科、骨盆外科	2020-04-12	2020-05-13	2977431	刘汉中	男	49Y	跟骨骨折	肝囊肿;前列腺结石	治愈	孔建中	王鉴顺	柯陈荣	跟骨骨折切开复位术
1370	D07儿童骨科、骨盆外科	2020-05-10	2020-05-14	2977902	陈茹	女	29Y	取除骨折内固定装置	脂肪肝	其他	翁益民	翁益民	翁益民	踝关节内固定物取出术
1371	D07儿童骨科、骨盆外科	2020-05-03	2020-05-16	2978340	黄眉妹	女	74Y	股骨颈骨折	高血压病;阿尔茨海默病;2型糖尿病;脂肪肝	治愈	孔建中	王鉴顺	柯陈荣	全髋关节置换术;髋关节滑膜切除术
1372	D07儿童骨科、骨盆外科	2020-05-02	2020-05-16	2978351	金碧霞	女	66Y	髌骨骨折	2型糖尿病	治愈	孔建中	王鉴顺	柯陈荣	髌骨骨折切开复位术;股四头肌成形术
1373	D07儿童骨科、骨盆外科	2020-05-11	2020-05-16	2978356	卓家墨	男	6Y	取除骨折内固定装置		其他	张敬东	易先宏	毛诚晃	股骨内固定物取出术
1374	D07儿童骨科、骨盆外科	2020-04-29	2020-05-16	2978357	陈朱莲	女	78Y	股骨粗隆间骨折	高血压病;2型糖尿病	治愈	翁益民	翁益民	翁益民	股骨骨折闭合复位术
1375	D07儿童骨科、骨盆外科	2020-05-07	2020-05-16	2978359	黄子逸	男	4Y	胫腓骨下端骨折		治愈	张敬东	易先宏	毛诚晃	胫骨骨折切开复位术
1376	D07儿童骨科、骨盆外科	2020-05-01	2020-05-16	2978366	李方连	男	55Y	跟骨骨折		治愈	孔建中	王鉴顺	柯陈荣	跟骨骨折切开复位术;跟骨植骨术
1377	D07儿童骨科、骨盆外科	2020-05-10	2020-05-16	2978370	罗栩	男	7Y	尺骨桡骨骨干骨折		治愈	张敬东	易先宏	毛诚晃	尺桡关节脱位切开复位术
1378	D07儿童骨科、骨盆外科	2020-05-13	2020-05-16	2978374	周王涛	男	13Y	肱骨髁上骨折		治愈	张敬东	易先宏	李玉安	肱骨骨折闭合复位术
1379	D07儿童骨科、骨盆外科	2020-05-06	2020-05-16	2978378	林允杰	男	6Y	胫骨骨折		治愈	张敬东	易先宏	毛诚晃
1380	D07儿童骨科、骨盆外科	2020-05-09	2020-05-16	2978382	梁世斌	男	6Y	取除骨折内固定装置		其他	张敬东	易先宏	李玉安	股骨内固定物取出术
1381	D07儿童骨科、骨盆外科	2020-05-13	2020-05-16	2978388	夏艳华	女	28Y	股骨干骨折	贫血	治愈	翁益民	翁益民	翁益民
1382	D07儿童骨科、骨盆外科	2020-04-30	2020-05-16	2978399	林娇弟	女	80Y	股骨粗隆间骨折	肺部感染	治愈	翁益民	翁益民	翁益民	股骨骨折闭合复位术
1383	D07儿童骨科、骨盆外科	2020-04-30	2020-05-16	2978413	陈慧青	女	21Y	肱骨外科颈骨折	头部伴颈部浅表损伤;耻骨骨折;骨盆骨折;坐骨骨折	治愈	翁益民	翁益民	翁益民	肱骨骨折切开复位术
1384	D07儿童骨科、骨盆外科	2020-04-29	2020-05-16	2978424	葛伦妹	女	80Y	股骨颈骨折	尺骨茎突骨折;桡骨下端骨折;股骨干骨折	治愈	翁益民	翁益民	翁益民	人工股骨头置换术
1385	D07儿童骨科、骨盆外科	2020-05-07	2020-05-16	2978439	魏建修	男	35Y	锁骨骨折		治愈	翁益民	翁益民	翁益民	锁骨骨折切开复位术
1386	D07儿童骨科、骨盆外科	2020-04-30	2020-05-17	2978670	赵盛榆	男	3Y	股骨下端骨折	脑挫伤;颞骨骨折;肺挫伤;周围性面神经麻痹;硬膜下血肿;颅腔积气	治愈	张敬东	易先宏	毛诚晃	股骨骨折闭合复位术
1387	D07儿童骨科、骨盆外科	2020-05-12	2020-05-17	2978673	张子晨	男	6Y	肱骨外髁骨折		治愈	张敬东	李玉安	方明桥	肱骨骨折切开复位术
1388	D07儿童骨科、骨盆外科	2020-05-13	2020-05-17	2978678	史嘉颖	女	6Y	肱骨髁上骨折		治愈	张敬东	易先宏	李玉安	肱骨骨折闭合复位术
1389	D07儿童骨科、骨盆外科	2020-05-15	2020-05-17	2978688	黄铖豪	男	13Y	肱骨髁上骨折		治愈	张敬东	易先宏	毛诚晃	肱骨骨折闭合复位术
1390	D07儿童骨科、骨盆外科	2020-05-09	2020-05-17	2978914	朱碎媛	女	81Y	股骨颈骨折	高血压病;2型糖尿病;陈旧性肋骨骨折;慢性支气管炎	未愈	孔建中	王鉴顺	柯陈荣
1391	D07儿童骨科、骨盆外科	2020-05-12	2020-05-17	2978941	陈奕汝	女	6Y	尺骨骨折	桡骨骨折	好转	孔建中	王鉴顺	柯陈荣
1392	D07儿童骨科、骨盆外科	2020-05-14	2020-05-18	2979050	徐婉萍	女	1Y	肱骨髁上骨折		治愈	张敬东	易先宏	毛诚晃	肱骨骨折闭合复位术
1393	D07儿童骨科、骨盆外科	2020-04-26	2020-05-18	2979075	黄树	男	64Y	锁骨骨折	肋骨骨折;肺部感染;胸腔积液;肌腱损伤;肾结石;液气胸;臂丛神经损伤;肺挫伤;肩胛骨骨折	治愈	翁益民	翁益民	翁益民	肩胛骨骨折切开复位钢板内固定术;锁骨骨折切开复位术
1394	D07儿童骨科、骨盆外科	2020-05-10	2020-05-18	2979086	吕文威	男	10Y	肱骨骨折	肺挫伤;慢性鼻窦炎;头皮血肿	好转	张敬东	易先宏	毛诚晃	肱骨骨折切开复位术
1395	D07儿童骨科、骨盆外科	2020-05-09	2020-05-18	2979094	杨立华	男	38Y	髌骨骨折	胆囊结石;脂肪肝	治愈	翁益民	翁益民	翁益民	髌骨骨折切开复位术
1396	D07儿童骨科、骨盆外科	2020-04-22	2020-05-18	2979117	徐继松	男	69Y	骨盆骨折	骶骨骨折;肋骨骨折;耻骨骨折;髂骨骨折;肩胛骨骨折;肺挫伤;创伤性胸腔积液	好转	孔建中	王鉴顺	柯陈荣	骨盆骨折切开复位钢针内固定术;骨盆骨折切开复位钢板内固定术
1397	D07儿童骨科、骨盆外科	2020-05-15	2020-05-18	2979183	薛丁豪	男	5Y	肱骨髁上骨折		治愈	张敬东	张敬东	方明桥	肱骨骨折闭合复位术
1398	D07儿童骨科、骨盆外科	2020-05-14	2020-05-18	2979259	朱琴希	女	10Y	桡骨颈骨折		治愈	张敬东	易先宏	毛诚晃	桡骨骨折闭合复位术
1399	D07儿童骨科、骨盆外科	2020-05-09	2020-05-19	2979387	罗小兵	男	36Y	肱骨髁上骨折		治愈	孔建中	王鉴顺	柯陈荣	股骨骨折切开复位术
1400	D07儿童骨科、骨盆外科	2020-05-17	2020-05-19	2979394	苏敏雯	女	9Y	肱骨髁上骨折		治愈	张敬东	李玉安	李玉安	肱骨骨折闭合复位术
1401	D07儿童骨科、骨盆外科	2020-05-17	2020-05-19	2979401	陈乐乐	女	5Y	尺骨骨折		好转	张敬东	易先宏	毛诚晃
1402	D07儿童骨科、骨盆外科	2020-05-14	2020-05-19	2979406	陈礼生	男	42Y	股骨粗隆间骨折	肾结石;前列腺结石;脂肪肝	好转	孔建中	王鉴顺	柯陈荣
1403	D07儿童骨科、骨盆外科	2020-05-04	2020-05-20	2979698	侯浩晖	男	11Y	手术后伤口愈合不良	陈旧性桡骨骨折;传染性湿疹样皮炎	治愈	张敬东	易先宏	方明桥
1404	D07儿童骨科、骨盆外科	2020-05-16	2020-05-20	2979741	陈璟雯	女	7Y	肱骨髁上骨折		治愈	张敬东	易先宏	方明桥	肱骨骨折闭合复位术
1405	D07儿童骨科、骨盆外科	2020-05-11	2020-05-20	2979744	李辰宇	男	1Y	开放性手部损伤	开放性拇指骨折;前臂拇指屈肌断裂	治愈	张敬东	易先宏	毛诚晃	手部肌腱延迟性缝合术;指骨骨折切开复位术;皮肤和皮下组织脓肿抽吸术
1406	D07儿童骨科、骨盆外科	2020-05-15	2020-05-20	2979745	陈匡杰	男	4Y	肱骨外髁骨折		治愈	张敬东	易先宏	李玉安	肱骨骨折切开复位术;石膏绷带固定
1407	D07儿童骨科、骨盆外科	2020-05-16	2020-05-20	2979746	胡欣妍	女	1Y	肱骨干骨折		治愈	张敬东	易先宏	李玉安	跟骨骨折切开复位术
1408	D07儿童骨科、骨盆外科	2020-05-05	2020-05-20	2979749	陈漫	男	46Y	桡骨骨折	皮肤挫伤;髋关节脱位;股骨骨折;肺结节病	治愈	孔建中	王鉴顺	柯陈荣	桡骨骨折闭合复位术
1409	D07儿童骨科、骨盆外科	2020-05-11	2020-05-20	2979755	赵冬玲	女	55Y	胫腓骨干骨折		治愈	孔建中	王鉴顺	柯陈荣	胫骨骨折切开复位术
1410	D07儿童骨科、骨盆外科	2020-05-10	2020-05-20	2979764	吴翠香	女	69Y	肱骨髁间骨折	特指手术后状态;高血压病;脑梗死;糖尿病	治愈	孔建中	王鉴顺	柯陈荣	股骨骨折切开复位术
1411	D07儿童骨科、骨盆外科	2020-05-14	2020-05-20	2979768	杨军	男	25Y	锁骨骨折	特指手术后状态;腰背部皮肤撕脱伤	治愈	翁益民	翁益民	翁益民	锁骨骨折切开复位术
1412	D07儿童骨科、骨盆外科	2020-04-30	2020-05-20	2979771	沈建宗	男	49Y	胫骨骨折	半月板损伤;腓骨骨折;膝关节副韧带劳损	治愈	翁益民	翁益民	翁益民	胫骨骨折切开复位术
1413	D07儿童骨科、骨盆外科	2020-05-11	2020-05-20	2979994	黄美娟	女	64Y	锁骨骨折	头皮血肿;肋骨骨折;胆囊息肉;脂肪肝;胸腔积液	治愈	孔建中	王鉴顺	柯陈荣	锁骨骨折切开复位术
1414	D07儿童骨科、骨盆外科	2020-05-17	2020-05-21	2980130	池贝禾	女	1Y	肱骨外髁骨折	鹰嘴骨折	治愈	张敬东	易先宏	闫广奎	肱骨骨折切开复位术
1415	D07儿童骨科、骨盆外科	2020-05-19	2020-05-23	2980569	王亚楠	女	6Y	取除骨折内固定装置		其他	张敬东	易先宏	闫广奎	胫骨内固定物取出术
1416	D07儿童骨科、骨盆外科	2020-05-14	2020-05-23	2980592	程小莲	女	58Y	股骨颈骨折		治愈	孔建中	王鉴顺	柯陈荣	全髋关节置换术;髋关节滑膜切除术
1417	D07儿童骨科、骨盆外科	2020-05-19	2020-05-23	2980597	蔡昊炀	男	4Y	取除骨折内固定装置		其他	张敬东	易先宏	闫广奎	股骨内固定物取出术
1418	D07儿童骨科、骨盆外科	2020-05-20	2020-05-23	2980599	黄淑贤	女	66Y	肱骨上端骨折		治愈	孔建中	王鉴顺	柯陈荣	跟骨骨折切开复位术
1419	D07儿童骨科、骨盆外科	2020-05-12	2020-05-23	2980601	袁康抱	男	47Y	内踝骨折	距骨骨折	好转	孔建中	王鉴顺	柯陈荣	踝关节骨折切开复位术
1420	D07儿童骨科、骨盆外科	2020-05-19	2020-05-23	2980604	张筱萍	女	40Y	三踝骨折	踝关节脱位	治愈	孔建中	王鉴顺	柯陈荣	踝关节骨折切开复位术
1421	D07儿童骨科、骨盆外科	2020-04-28	2020-05-23	2980639	王孟洧	男	57Y	开放性外踝骨折	高血压病	治愈	孔建中	王鉴顺	柯陈荣	踝关节骨折切开复位术;皮肤和皮下组织脓肿抽吸术;皮肤和皮下坏死组织切除清创术
1422	D07儿童骨科、骨盆外科	2020-05-13	2020-05-24	2980945	姜升柳	女	86Y	股骨颈骨折	高血压病;慢性支气管炎	治愈	翁益民	翁益民	翁益民	人工股骨头置换术
1423	D07儿童骨科、骨盆外科	2020-05-15	2020-05-24	2980965	何俞莹	女	10Y	髌骨骨折	下肢皮肤撕裂伤;轻度贫血	治愈	张敬东	易先宏	毛诚晃	髌骨骨折切开复位术
1424	D07儿童骨科、骨盆外科	2020-05-19	2020-05-24	2980971	郑淑怡	女	11Y	肱骨髁上骨折	尺神经损害	治愈	张敬东	易先宏	方明桥	肱骨骨折闭合复位术
1425	D07儿童骨科、骨盆外科	2020-05-13	2020-05-24	2980972	姚进	男	29Y	胫腓骨下端骨折	开放性指骨骨折	治愈	孔建中	王鉴顺	柯陈荣	胫骨骨折切开复位术;皮肤和皮下坏死组织切除清创术
1426	D07儿童骨科、骨盆外科	2020-05-23	2020-05-25	2981334	刘悠然	女	2Y	肱骨髁上骨折		好转	张敬东	易先宏	毛诚晃
1427	D07儿童骨科、骨盆外科	2020-05-21	2020-05-25	2981337	陈忠涵	男	5Y	肱骨外髁骨折		治愈	张敬东	易先宏	方明桥	肱骨骨折切开复位术
1428	D07儿童骨科、骨盆外科	2020-05-16	2020-05-26	2981678	陈化兰	女	65Y	肱骨外科颈骨折	心肌病;肩关节脱位	治愈	翁益民	翁益民	翁益民	肱骨骨折切开复位术
1429	D07儿童骨科、骨盆外科	2020-05-21	2020-05-26	2981682	许梓怡	女	8Y	肱骨髁上骨折		治愈	张敬东	易先宏	方明桥	跟骨骨折闭合复位术
1430	D07儿童骨科、骨盆外科	2020-05-19	2020-05-26	2981685	杨建沛	男	14Y	肱骨外科颈骨折	骨骺滑脱	治愈	张敬东	易先宏	李玉安	肱骨骨折闭合复位术
1431	D07儿童骨科、骨盆外科	2020-05-14	2020-05-26	2981693	周咏晖	男	17Y	三踝骨折		治愈	翁益民	翁益民	翁益民	踝关节骨折切开复位术
1432	D07儿童骨科、骨盆外科	2020-05-20	2020-05-26	2981704	石志涵	男	3Y	取除骨折内固定装置		其他	张敬东	易先宏	方明桥	瘢痕松解术;股骨内固定物取出术
1433	D07儿童骨科、骨盆外科	2020-05-18	2020-05-27	2981958	郑玉英	女	52Y	三踝骨折	恶性肿瘤手术后随诊检查	治愈	孔建中	陈鸿亮	项光恒	踝关节骨折切开复位术
1434	D07儿童骨科、骨盆外科	2020-05-20	2020-05-27	2982020	黄梁红	女	53Y	肱骨髁间骨折		治愈	王振文	水小龙	水小龙	肱骨骨折切开复位术
1435	D07儿童骨科、骨盆外科	2020-05-20	2020-05-27	2982021	黄玉平	女	51Y	取除骨折内固定装置	焦虑状态;2型糖尿病	其他	孔建中	陈鸿亮	项光恒	肱骨内固定物取出术
1436	D07儿童骨科、骨盆外科	2020-05-25	2020-05-27	2982022	李美慧	女	6Y	肱骨髁上骨折		治愈	张敬东	易先宏	闫广奎	肱骨骨折闭合复位术
1437	D07儿童骨科、骨盆外科	2020-05-18	2020-05-27	2982025	叶棋	男	22Y	肘关节脱位	尺骨骨折	治愈	孔建中	陈鸿亮	项光恒	尺骨骨折切开复位术;肘关节固定术;副韧带修补术
1438	D07儿童骨科、骨盆外科	2020-05-20	2020-05-27	2982092	胡月花	女	76Y	股骨粗隆间骨折	阿尔茨海默病;高血压病;皮肤挫伤	治愈	孔建中	陈鸿亮	项光恒	股骨骨折闭合复位术
1439	D07儿童骨科、骨盆外科	2020-05-16	2020-05-28	2982376	林松英	女	75Y	肱骨颈骨折	大脑动脉闭塞脑梗死;老年性痴呆	治愈	翁益民	翁益民	翁益民	人工股骨头置换术
1440	D07儿童骨科、骨盆外科	2020-05-22	2020-05-28	2982391	陈培彩	男	14Y	尺骨骨折		治愈	张敬东	易先宏	李玉安	尺骨骨折切开复位术
1441	D07儿童骨科、骨盆外科	2020-05-24	2020-05-30	2982788	黄优璇	女	2Y	开放性足骨折	开放性跖骨骨折	治愈	张敬东	易先宏	毛诚晃
1442	D07儿童骨科、骨盆外科	2020-05-24	2020-05-30	2982790	邵欣	女	8Y	取除骨折内固定装置		其他	张敬东	易先宏	毛诚晃	股骨内固定物取出术
1443	D07儿童骨科、骨盆外科	2020-05-23	2020-05-30	2982794	黎舟	男	14Y	桡骨骨折		治愈	张敬东	易先宏	李玉安	桡骨骨折切开复位术
1444	D07儿童骨科、骨盆外科	2020-05-24	2020-05-30	2982802	董子怡	女	4Y	肱骨髁上骨折		治愈	张敬东	易先宏	闫广奎	肱骨骨折闭合复位术
1445	D07儿童骨科、骨盆外科	2020-05-24	2020-05-30	2982807	潘昱凯	男	4Y	肱骨髁上骨折		治愈	张敬东	易先宏	毛诚晃	肱骨骨折闭合复位术
1446	D07儿童骨科、骨盆外科	2020-05-21	2020-05-30	2982812	高春霞	女	36Y	三踝骨折		治愈	孔建中	王鉴顺	柯陈荣	踝关节骨折切开复位术
1447	D07儿童骨科、骨盆外科	2020-05-21	2020-05-30	2982835	罗琼珍	男	52Y	股骨颈骨折	骨折治疗后恢复期	治愈	孔建中	王鉴顺	柯陈荣	股骨骨折切开复位术
1448	D07儿童骨科、骨盆外科	2020-05-22	2020-05-30	2982837	娄雯	女	36Y	三踝骨折	踝关节脱位	治愈	孔建中	王鉴顺	柯陈荣	踝关节骨折切开复位术
1449	D07儿童骨科、骨盆外科	2020-05-19	2020-05-30	2982842	赵松	男	19Y	胫骨骨折		治愈	孔建中	王鉴顺	柯陈荣	胫骨骨折切开复位术
1450	D07儿童骨科、骨盆外科	2020-05-24	2020-05-30	2982845	余廷佐	男	38Y	特指趾骨骨折	胆囊结石;高血压病;皮肤挫伤;脂肪肝	治愈	翁益民	翁益民	翁益民	趾骨骨折切开复位术
1451	D07儿童骨科、骨盆外科	2020-05-17	2020-05-30	2982850	吴巧英	女	82Y	股骨粗隆间骨折	胆囊结石;高血压病;2型糖尿病	治愈	翁益民	翁益民	翁益民	股骨骨折切开复位术
1452	D07儿童骨科、骨盆外科	2020-05-20	2020-05-30	2982938	毛根富	男	43Y	胫骨骨折	膝关节十字韧带扭伤;膝关节副韧带扭伤;半月板损伤;膝关节积液	好转	赵友明	赵友明	郭伟军	胫骨骨折切开复位术
1453	D07儿童骨科、骨盆外科	2020-05-22	2020-05-31	2983257	仇明迪	男	41Y	胫骨骨折	腓骨骨折	治愈	孔建中	王鉴顺	柯陈荣	胫骨植骨术;胫骨骨折切开复位术;膝关节半月板成形术
1454	D07儿童骨科、骨盆外科	2020-05-24	2020-05-31	2983274	王泽民	男	12Y	锁骨骨折		治愈	张敬东	易先宏	李玉安	锁骨骨折切开复位术
1455	D07儿童骨科、骨盆外科	2020-05-04	2020-05-31	2983280	郑洪才	男	10Y	股骨下端骨折	肌腱和肌肉损伤	治愈	张敬东	易先宏	李玉安	股骨骨折闭合复位术
1456	D07儿童骨科、骨盆外科	2020-05-17	2020-05-31	2983295	潘国雄	男	48Y	开放性股骨骨折	肋骨骨折;眶骨骨折;胸腔积液;皮下血肿;多处挫伤;肺挫伤;股骨颈骨折	治愈	孔建中	王鉴顺	柯陈荣	股骨骨折闭合复位术;皮肤和皮下坏死组织切除清创术
1457	D07儿童骨科、骨盆外科	2020-05-17	2020-05-31	2983299	陈苏	男	13Y	胫腓骨下端骨折		治愈	张敬东	易先宏	李玉安	胫骨骨折切开复位术
1458	D07儿童骨科、骨盆外科	2020-05-18	2020-05-31	2983305	徐焕林	男	47Y	桡骨下端骨折	上肢肌肉和肌腱损伤	治愈	翁益民	翁益民	翁益民	桡骨骨折切开复位术
1459	D07儿童骨科、骨盆外科	2020-05-24	2020-05-31	2983324	范梓逸	男	2Y	股骨干骨折		治愈	张敬东	易先宏	毛诚晃	股骨骨折闭合复位术
1460	D07儿童骨科、骨盆外科	2020-05-30	2020-06-01	2983673	叶梓翔	男	6Y	肱骨髁间骨折		治愈	张敬东	易先宏	王伟	肱骨骨折闭合复位钢针内固定术
1461	D07儿童骨科、骨盆外科	2020-05-27	2020-06-01	2983851	刘雪眉	女	50Y	桡骨头骨折	甲状腺机能亢进症	治愈	孔建中	陈鸿亮	项光恒	桡骨骨折切开复位钢针内固定术
1462	D07儿童骨科、骨盆外科	2020-05-06	2020-06-02	2983917	章翠云	女	70Y	开放性足损伤	手术后恢复期;胫腓骨干骨折;胆囊息肉	治愈	翁益民	翁益民	翁益民	足截断术
1463	D07儿童骨科、骨盆外科	2020-05-26	2020-06-02	2983919	黄肖灿	男	9Y	股骨骨折		治愈	张敬东	易先宏	闫广奎	股骨骨折闭合复位钢针内固定术
1464	D07儿童骨科、骨盆外科	2020-05-27	2020-06-02	2983923	张嘉怡	女	4Y	尺骨骨折	前臂桡神经损伤	治愈	张敬东	易先宏	方明桥	尺骨骨折闭合复位钢针内固定术
1465	D07儿童骨科、骨盆外科	2020-05-21	2020-06-02	2984076	吴学明	男	50Y	锁骨骨折	手术后恢复期;多处浅表损伤	治愈	王振文	水小龙	水小龙	锁骨骨折切开复位钢板内固定术
1466	D07儿童骨科、骨盆外科	2020-05-27	2020-06-03	2984276	廖佳欣	女	3Y	开放性多发性指骨骨折		治愈	张敬东	易先宏	闫广奎	石膏绷带固定;手清创术
1467	D07儿童骨科、骨盆外科	2020-05-31	2020-06-03	2984281	王子豪	男	8Y	肱骨髁上骨折		治愈	张敬东	易先宏	方明桥	肱骨骨折闭合复位钢针内固定术
1468	D07儿童骨科、骨盆外科	2020-05-20	2020-06-03	2984282	谷熙	男	52Y	闭合性胫骨平台骨折	腓骨骨折	治愈	王振文	水小龙	水小龙	胫骨骨折切开复位钢板内固定术
1469	D07儿童骨科、骨盆外科	2020-04-26	2020-06-03	2984293	陈时健	男	56Y	胫腓骨干骨折	结肠积气;高血压病;单纯性肾囊肿;肾结石;头皮血肿;肝囊肿	治愈	翁益民	翁益民	翁益民	腓骨骨折切开复位钢板内固定术;皮肤及皮下组织清创术;皮肤和皮下组织切开引流术;同种皮肤移植术
1470	D07儿童骨科、骨盆外科	2020-05-26	2020-06-03	2984296	陈美飞	女	44Y	锁骨骨折	肺特指疾患;肋骨骨折;胸腔积液	治愈	翁益民	翁益民	翁益民	锁骨骨折切开复位钢针内固定术
1471	D07儿童骨科、骨盆外科	2020-05-30	2020-06-03	2984299	张欣	女	6Y	肱骨髁上骨折	上臂桡神经损伤	治愈	张敬东	李玉安	李玉安	肱骨骨折切开复位钢针内固定术
1472	D07儿童骨科、骨盆外科	2020-05-26	2020-06-03	2984302	张阿丽	女	34Y	肱骨外科颈骨折		治愈	孔建中	陈鸿亮	项光恒	肱骨骨折切开复位钢板内固定术
1473	D07儿童骨科、骨盆外科	2020-05-29	2020-06-03	2984305	潘弘峰	男	16Y	尺骨桡骨骨干骨折		治愈	孔建中	陈鸿亮	项光恒	尺骨骨折闭合复位钢针内固定术;桡骨骨折闭合复位钢针内固定术
1474	D07儿童骨科、骨盆外科	2020-05-21	2020-06-03	2984452	叶菊花	女	92Y	股骨颈骨折	肝囊肿;单纯性肾囊肿	治愈	孔建中	陈鸿亮	项光恒	股骨病损切除术;人工股骨头置换术
1475	D07儿童骨科、骨盆外科	2020-05-28	2020-06-03	2984587	朱婧婕	女	9Y	肱骨外科颈骨折	面部擦伤;鼻中隔溃疡	治愈	张敬东	易先宏	方明桥	肱骨骨折闭合复位髓内针内固定术
1476	D07儿童骨科、骨盆外科	2020-05-31	2020-06-04	2984757	陈思蕊	女	6Y	肱骨髁上骨折		治愈	张敬东	易先宏	毛诚晃	肱骨骨折切开复位钢针内固定术
1477	D07儿童骨科、骨盆外科	2020-05-21	2020-06-06	2985052	王美霞	女	74Y	股骨下端骨折	特指手术后状态	治愈	孔建中	陈鸿亮	项光恒	肱骨骨折闭合复位髓内针内固定术
1478	D07儿童骨科、骨盆外科	2020-06-02	2020-06-06	2985120	黄银来	男	76Y	锁骨骨折		治愈	孔建中	陈鸿亮	项光恒	锁骨骨折切开复位钢板内固定术
1479	D07儿童骨科、骨盆外科	2020-05-28	2020-06-06	2985126	王皓朗	男	3Y	开放性肱骨骨折	前臂桡神经损伤	治愈	张敬东	易先宏	方明桥	肱骨髓内针内固定术;肱骨开放性骨折清创术;皮肤和皮下组织切开引流术
1480	D07儿童骨科、骨盆外科	2020-05-23	2020-06-06	2985139	李栢茹	女	5Y	胫腓骨干骨折		治愈	张敬东	易先宏	毛诚晃	胫骨骨折切开复位钢针内固定术
1481	D07儿童骨科、骨盆外科	2020-05-22	2020-06-06	2985143	谷旭良	男	25Y	跟骨骨折		治愈	孔建中	陈鸿亮	项光恒	跟骨骨折切开复位钢板内固定术
1482	D07儿童骨科、骨盆外科	2020-06-02	2020-06-06	2985153	朱新祥	男	12Y	肱骨髁上骨折	前臂神经损伤	治愈	张敬东	易先宏	方明桥	肱骨骨折闭合复位钢针内固定术
1483	D07儿童骨科、骨盆外科	2020-05-29	2020-06-06	2985154	林锟	男	46Y	跟骨骨折	单纯性肾囊肿	治愈	孔建中	陈鸿亮	项光恒	跟骨骨折切开复位钢针内固定术;跟骨植骨术
1484	D07儿童骨科、骨盆外科	2020-05-28	2020-06-06	2985435	吴莲华	女	78Y	肱骨骨折	高血压病	治愈	翁益民	翁益民	翁益民	肱骨骨折切开复位钢板内固定术
1485	D07儿童骨科、骨盆外科	2020-05-31	2020-06-08	2985841	白传长	男	45Y	跟骨骨折	楔状骨骨折(足);肾结石;跖骨骨折;痛风	治愈	孔建中	陈鸿亮	项光恒	跟骨骨折切开复位钢板内固定术;皮肤和皮下组织切开引流术
1486	D07儿童骨科、骨盆外科	2020-05-30	2020-06-08	2985876	刘渠涛	男	2Y	股骨干骨折		治愈	张敬东	易先宏	方明桥	股骨骨折闭合复位术;石膏绷带固定
1487	D07儿童骨科、骨盆外科	2020-06-04	2020-06-08	2985922	张文炫	男	7Y	肱骨髁间骨折		治愈	张敬东	易先宏	方明桥	肱骨骨折闭合复位钢针内固定术
1488	D07儿童骨科、骨盆外科	2020-05-29	2020-06-08	2985926	汤依琳	女	8Y	肱骨外科颈骨折	头皮血肿;多处浅表损伤	治愈	张敬东	易先宏	李玉安	肱骨钢针内固定术;肌腱、血管、神经探查术;肩袖修补术
1489	D07儿童骨科、骨盆外科	2020-06-03	2020-06-08	2985930	李如莹	女	4Y	取除骨折内固定装置		其他	张敬东	易先宏	李玉安	股骨内固定物取出术
1490	D07儿童骨科、骨盆外科	2020-06-03	2020-06-08	2985934	吴兴锐	男	2Y	肱骨骨折		治愈	张敬东	易先宏	王伟	肱骨骨折闭合复位钢针内固定术
1491	D07儿童骨科、骨盆外科	2020-05-22	2020-06-08	2985945	金恩明	男	38Y	桡骨骨折	腕浅表损伤	治愈	孔建中	陈鸿亮	项光恒	桡骨骨折切开复位钢针内固定术
1492	D07儿童骨科、骨盆外科	2020-06-04	2020-06-08	2985989	张克	男	34Y	胫骨骨折	大腿损伤;膝关节副韧带扭伤;股骨骨折;前列腺结石;脂肪肝	好转	翁益民	翁益民	翁益民
1493	D07儿童骨科、骨盆外科	2020-05-14	2020-06-08	2985995	万言学	男	55Y	胫骨骨折	半月板损伤;膝关节积液;下肢浅表损伤;耻骨骨折;膝关节十字韧带扭伤	治愈	翁益民	翁益民	翁益民	胫骨骨折切开复位钢针内固定术
1494	D07儿童骨科、骨盆外科	2020-06-06	2020-06-09	2986351	司美祥	男	5Y	肱骨髁上骨折		治愈	张敬东	易先宏	李玉安	肱骨骨折切开复位钢针内固定术
1495	D07儿童骨科、骨盆外科	2020-06-07	2020-06-10	2986536	张珈鸣	男	2Y	取除骨折内固定装置		其他	张敬东	易先宏	方明桥	股骨内固定物取出术
1496	D07儿童骨科、骨盆外科	2020-06-01	2020-06-10	2986538	戴景浩	男	5Y	胫骨骨折	腓骨骨折	治愈	张敬东	易先宏	闫广奎	胫骨骨折闭合复位髓内针内固定术
1497	D07儿童骨科、骨盆外科	2020-06-05	2020-06-10	2986571	朱品端	男	6Y	肱骨髁上骨折		治愈	张敬东	易先宏	方明桥	肱骨骨折闭合复位钢针内固定术
1498	D07儿童骨科、骨盆外科	2020-06-06	2020-06-11	2986705	王松玲	女	50Y	取除骨折内固定装置		其他	孔建中	陈鸿亮	项光恒	股骨内固定物取出术;桡骨内固定物取出术;尺骨内固定物取出术
1499	D07儿童骨科、骨盆外科	2020-06-02	2020-06-11	2986708	阳江海	男	32Y	锁骨骨折		治愈	孔建中	陈鸿亮	项光恒	锁骨骨折切开复位钢板内固定术
1500	D07儿童骨科、骨盆外科	2020-05-11	2020-06-12	2985576	夏堂清	男	80Y	开放性胫骨骨折	小腿浅表损伤	治愈	孔建中	陈鸿亮	项光恒	胫骨钢板内固定术;皮肤及皮下组织清创术
1501	D07儿童骨科、骨盆外科	2020-06-01	2020-06-12	2986834	翁秀连	女	48Y	股骨颈骨折	高血压病;子宫切除术后状态	治愈	孔建中	陈鸿亮	项光恒	股骨骨折闭合复位螺钉内固定术
1502	D07儿童骨科、骨盆外科	2020-05-27	2020-06-12	2986873	俞桂凤	女	66Y	三踝骨折	2型糖尿病	治愈	孔建中	陈鸿亮	项光恒	踝关节骨折切开复位钢针内固定术
1503	D07儿童骨科、骨盆外科	2020-06-10	2020-06-12	2986877	姜紫茜	女	6M	尺骨桡骨骨干骨折		好转	张敬东	易先宏	李玉安
1504	D07儿童骨科、骨盆外科	2020-06-07	2020-06-13	2987169	林小玲	女	37Y	胫骨骨折		治愈	孔建中	陈鸿亮	项光恒	胫骨骨折切开复位钢针内固定术
1505	D07儿童骨科、骨盆外科	2020-05-15	2020-06-13	2987219	干爱菊	女	59Y	股骨骨折	面部挫伤;肺挫伤;肱骨骨折;肩胛骨骨折;肋骨骨折;多发性骨折;多处挫伤	治愈	孔建中	陈鸿亮	项光恒	胫骨骨折切开复位钢针内固定术;腓骨骨折切开复位钢针内固定术;肩胛骨骨折切开复位钢板内固定术;股骨骨折闭合复位髓内针内固定术;肱骨骨折切开复位钢针内固定术
1506	D07儿童骨科、骨盆外科	2020-05-25	2020-06-13	2987306	韩爱玉	女	88Y	股骨粗隆间骨折	高血压病;肝囊肿	治愈	翁益民	翁益民	翁益民	股骨骨折闭合复位髓内针内固定术
1507	D07儿童骨科、骨盆外科	2020-06-10	2020-06-14	2987518	林智博	男	10Y	肱骨髁上骨折		治愈	张敬东	易先宏	方明桥	肱骨骨折闭合复位钢针内固定术
1508	D07儿童骨科、骨盆外科	2020-05-29	2020-06-14	2987519	王来凤	女	71Y	三踝骨折	高血压病;肾超声检查异常;肝回声不均;肝血管瘤;肾错构瘤;肺部感染	治愈	翁益民	翁益民	翁益民	踝关节骨折切开复位钢针内固定术
1509	D07儿童骨科、骨盆外科	2020-06-07	2020-06-15	2987908	郑思璇	女	2Y	肱骨外髁骨折		治愈	张敬东	易先宏	方明桥	肱骨骨折切开复位钢针内固定术
1510	D07儿童骨科、骨盆外科	2020-06-10	2020-06-15	2987911	徐子怡	女	5Y	肱骨外髁骨折		治愈	张敬东	易先宏	闫广奎	肱骨骨折切开复位钢针内固定术
1511	D07儿童骨科、骨盆外科	2020-06-11	2020-06-15	2987913	詹锦浩	男	6Y	取除骨折内固定装置		其他	张敬东	易先宏	闫广奎	尺骨内固定物取出术
1512	D07儿童骨科、骨盆外科	2020-06-10	2020-06-15	2987915	黄家诚	男	2Y	股骨干骨折	急性上颌窦炎	治愈	张敬东	易先宏	方明桥	股骨骨折切开复位髓内针内固定术
1513	D07儿童骨科、骨盆外科	2020-06-07	2020-06-15	2987926	张崇宽	男	64Y	股骨干骨折	单纯性肾囊肿;肾结石;前列腺结石;前列腺增生	治愈	孔建中	陈鸿亮	项光恒	股骨骨折切开复位钢板内固定术
1514	D07儿童骨科、骨盆外科	2020-06-11	2020-06-15	2987935	蔡亦博	男	4Y	开放性拇趾骨折	开放性足损伤	治愈	张敬东	易先宏	方明桥	皮肤及皮下组织清创术;甲床清创术
1515	D07儿童骨科、骨盆外科	2020-06-10	2020-06-15	2987951	林裕凯	男	11Y	尺骨桡骨闭合性骨折		治愈	翁益民	翁益民	翁益民	尺骨骨折闭合复位钢针内固定术;桡骨骨折闭合复位钢针内固定术
1516	D07儿童骨科、骨盆外科	2020-06-08	2020-06-16	2988185	周华	男	48Y	锁骨骨折	肋骨骨折	治愈	孔建中	陈鸿亮	项光恒	锁骨骨折切开复位钢板内固定术;锁骨植骨术
1517	D07儿童骨科、骨盆外科	2020-06-08	2020-06-16	2988295	黄品博	男	9Y	肱骨上端骨折		治愈	张敬东	易先宏	李玉安	肱骨骨折闭合复位钢针内固定术
1518	D07儿童骨科、骨盆外科	2020-06-12	2020-06-16	2988296	朱相同	男	4Y	陈旧性肱骨骨折	后天性肘内翻	治愈	张敬东	易先宏	方明桥	肱骨骨折切开复位钢针内固定术
1519	D07儿童骨科、骨盆外科	2020-06-12	2020-06-16	2988310	鲁昌炜	男	6Y	尺骨桡骨闭合性骨折	肱骨髁上骨折	治愈	张敬东	易先宏	李玉安	肱骨骨折闭合复位钢针内固定术;尺骨骨折闭合复位钢针内固定术;桡骨骨折闭合复位钢针内固定术
1520	D07儿童骨科、骨盆外科	2020-06-09	2020-06-16	2988313	王柏栋	男	9Y	尺骨骨折	前臂桡神经损伤;桡骨头脱位	治愈	张敬东	易先宏	李玉安	尺骨骨折切开复位钢板内固定术
1521	D07儿童骨科、骨盆外科	2020-06-13	2020-06-17	2988579	江雪萍	女	25Y	取除骨折内固定装置		其他	孔建中	陈鸿亮	项光恒	髌骨内固定物取出术
1522	D07儿童骨科、骨盆外科	2020-06-06	2020-06-17	2988587	夏远涵	男	9Y	胫腓骨干骨折		治愈	张敬东	易先宏	王伟	胫骨骨折切开复位钢板内固定术
1523	D07儿童骨科、骨盆外科	2020-06-07	2020-06-17	2988598	黄宗彬	男	15Y	髂骨骨折		治愈	翁益民	翁益民	翁益民	髂骨骨折切开复位螺钉内固定术
1524	D07儿童骨科、骨盆外科	2020-06-10	2020-06-17	2988603	陈智宇	男	1Y	股骨干骨折		治愈	张敬东	易先宏	方明桥	股骨骨折闭合复位术;石膏绷带固定
1525	D07儿童骨科、骨盆外科	2020-05-26	2020-06-17	2988731	林直享	男	64Y	跟骨骨折	肝囊肿	治愈	翁益民	翁益民	翁益民	跟骨骨折切开复位钢针内固定术
1526	D07儿童骨科、骨盆外科	2020-06-14	2020-06-18	2988939	张高杨	男	2Y	肱骨髁上骨折		治愈	张敬东	易先宏	闫广奎	股骨骨折闭合复位钢针内固定术
1527	D07儿童骨科、骨盆外科	2020-05-27	2020-06-18	2988946	林学庄	男	61Y	髂骨骨折	创伤性蛛网膜下腔出血;手术后恢复期;肾结石;胆囊息肉;尺骨骨折;结肠积气	治愈	翁益民	翁益民	翁益民	髂骨骨折切开复位钢板内固定术
1528	D07儿童骨科、骨盆外科	2020-06-07	2020-06-18	2988972	吴奶儿	女	75Y	股骨颈骨折		治愈	翁益民	翁益民	翁益民	人工股骨头置换术
1529	D07儿童骨科、骨盆外科	2020-06-15	2020-06-18	2989052	柯凯潮	男	5Y	取除骨折内固定装置		其他	张敬东	易先宏	李玉安	胫骨内固定物取出术;腓骨内固定物取出术
1530	D07儿童骨科、骨盆外科	2020-06-15	2020-06-18	2989101	雷祖翔	男	5Y	肱骨髁上骨折	正中神经损害	治愈	张敬东	易先宏	方明桥	肱骨骨折闭合复位钢针内固定术
1531	D07儿童骨科、骨盆外科	2020-06-12	2020-06-18	2989119	刘振玉	男	36Y	取除骨折内固定装置		其他	孔建中	陈鸿亮	项光恒	跟骨内固定物取出术
1532	D07儿童骨科、骨盆外科	2020-06-15	2020-06-20	2989372	陈友跑	男	63Y	取除骨折内固定装置		其他	翁益民	翁益民	翁益民	股骨内固定物取出术
1533	D07儿童骨科、骨盆外科	2020-06-16	2020-06-20	2989375	叶嘉俊	男	5Y	肱骨外髁骨折		治愈	张敬东	易先宏	闫广奎	肱骨骨折切开复位钢针内固定术
1534	D07儿童骨科、骨盆外科	2020-06-15	2020-06-20	2989379	吴瑾浩	男	4Y	肱骨外髁骨折		治愈	张敬东	易先宏	方明桥	肱骨骨折切开复位钢针内固定术
1535	D07儿童骨科、骨盆外科	2020-06-10	2020-06-20	2989382	陈呈轩	男	5Y	胫骨骨折		治愈	张敬东	易先宏	毛诚晃	胫骨骨折闭合复位髓内针内固定术
1536	D07儿童骨科、骨盆外科	2020-06-15	2020-06-20	2989387	刘绍焕	男	5Y	取除骨折内固定装置		其他	张敬东	易先宏	李玉安	股骨内固定物取出术
1537	D07儿童骨科、骨盆外科	2020-06-13	2020-06-20	2989627	孙云华	女	64Y	髌骨骨折	下肢动脉粥样硬化;肾结石	治愈	孔建中	陈鸿亮	项光恒	髌骨骨折切开复位张力带钢丝内固定术;股四头肌成形术
1538	D07儿童骨科、骨盆外科	2020-06-11	2020-06-21	2989835	林红胜	男	47Y	胫骨骨折		治愈	孔建中	陈鸿亮	项光恒	胫骨骨折切开复位钢针内固定术;膝关节半月板成形术
1539	D07儿童骨科、骨盆外科	2020-06-11	2020-06-21	2989836	林阿玉	女	83Y	髌骨骨折	高血压病;耻骨骨折	治愈	孔建中	陈鸿亮	项光恒	髂骨骨折切开复位钢板内固定术
1540	D07儿童骨科、骨盆外科	2020-06-11	2020-06-21	2989838	吴少钦	男	41Y	踝骨闭合性骨折	腓骨干骨折;脂肪肝	治愈	孔建中	陈鸿亮	项光恒	踝关节脱位闭合复位术;韧带修补术;踝关节囊缝合术
1541	D07儿童骨科、骨盆外科	2020-06-11	2020-06-21	2989842	黄贤校	男	58Y	股骨颈骨折	酒精性肝硬变;脾大;肝硬化失代偿期;门静脉高压;继发性血小板减少	治愈	孔建中	陈鸿亮	项光恒	股骨骨折闭合复位螺钉内固定术
1542	D07儿童骨科、骨盆外科	2020-05-30	2020-06-21	2989849	陈政	男	11Y	股骨干骨折		治愈	张敬东	易先宏	李玉安	股骨骨折切开复位钢板内固定术
1543	D07儿童骨科、骨盆外科	2020-06-15	2020-06-21	2989862	余行	男	13Y	肱骨髁间骨折		治愈	张敬东	易先宏	李玉安	肱骨骨折切开复位空心钉内固定术
1544	D07儿童骨科、骨盆外科	2020-06-12	2020-06-22	2990124	周胜春	男	66Y	股骨骨折	下肢皮肤套脱伤;腓骨骨折	治愈	孔建中	项光恒	陈鸿亮
1545	D07儿童骨科、骨盆外科	2020-06-15	2020-06-22	2990205	林翔	男	11Y	锁骨骨折	头皮裂伤	治愈	张敬东	易先宏	方明桥	锁骨骨折切开复位钢板内固定术
1546	D07儿童骨科、骨盆外科	2020-06-14	2020-06-22	2990212	黄爱菊	女	63Y	胫骨骨折	膝关节十字韧带扭伤	治愈	孔建中	陈鸿亮	项光恒	胫骨骨折切开复位钢针内固定术
1547	D07儿童骨科、骨盆外科	2020-06-11	2020-06-22	2990219	黄加泉	男	34Y	股骨粗隆间骨折		治愈	孔建中	陈鸿亮	项光恒	股骨骨折切开复位钢板内固定术;股骨骨折切开复位钢针内固定术
1548	D07儿童骨科、骨盆外科	2020-06-13	2020-06-22	2990323	郑锦华	女	68Y	跟骨骨折	高血压病	治愈	孔建中	陈鸿亮	项光恒	跟骨骨折切开复位钢针内固定术
1549	D07儿童骨科、骨盆外科	2020-06-11	2020-06-23	2990533	金敏丽	女	43Y	胫骨骨折	半月板损伤;腓神经损害	治愈	孔建中	陈鸿亮	项光恒	胫骨骨折切开复位钢板内固定术;膝关节半月板成形术
1550	D07儿童骨科、骨盆外科	2020-06-09	2020-06-23	2990535	徐莉呀	女	34Y	耻骨骨折	腰椎骨折;寰枢椎半脱位;创伤性胸腔积液;继发性甲状旁腺功能减退症	好转	潘骏	王鉴顺	王鉴顺
1551	D07儿童骨科、骨盆外科	2020-06-12	2020-06-23	2990540	张申德	男	57Y	胫骨骨折	小腿开放性损伤	治愈	孔建中	陈鸿亮	项光恒	胫骨骨折切开复位钢板内固定术
1552	D07儿童骨科、骨盆外科	2020-05-31	2020-06-24	2990794	雷海宝	女	29Y	腰椎骨折	腰骶神经根损伤;肱骨干骨折;耻骨骨折;骶骨骨折;桡神经损害;抑郁症	治愈	孔建中	项光恒	陈鸿亮	脊椎骨折复位术;椎弓根钉内固定术;肱骨骨折切开复位钢板内固定术;股骨骨折切开复位钢针内固定术;骶髂关节固定术
1553	D07儿童骨科、骨盆外科	2020-06-12	2020-06-24	2990808	谷春妹	女	74Y	股骨颈骨折	高血压病;下肢静脉血栓形成	治愈	孔建中	陈鸿亮	项光恒	全髋关节置换术
1554	D07儿童骨科、骨盆外科	2020-06-21	2020-06-24	2990854	陈威寰	男	6Y	肱骨髁上骨折	上肢神经损伤	治愈	张敬东	易先宏	方明桥	肱骨骨折闭合复位钢针内固定术
1555	D07儿童骨科、骨盆外科	2020-06-20	2020-06-24	2990864	曹松辉	男	57Y	取除骨折内固定装置		其他	孔建中	陈鸿亮	项光恒	股骨内固定物取出术
1556	D07儿童骨科、骨盆外科	2020-06-21	2020-06-25	2991335	黄彦皓	男	13Y	胫骨下端骨折		治愈	孔建中	陈鸿亮	项光恒	胫骨骨折闭合复位螺钉内固定术
1557	D07儿童骨科、骨盆外科	2020-06-17	2020-06-25	2991354	夏孟贺	男	37Y	股骨粗隆间骨折		治愈	翁益民	翁益民	翁益民
1558	D07儿童骨科、骨盆外科	2020-06-04	2020-06-25	2991366	陈阿丕	女	71Y	股骨下端骨折	高血压病;外踝骨折;内踝骨折	治愈	翁益民	翁益民	翁益民	踝关节骨折切开复位钢板内固定术;股骨骨折切开复位钢板内固定术
1559	D07儿童骨科、骨盆外科	2020-06-24	2020-06-27	2991680	林文信	男	1Y	肱骨髁上骨折		治愈	张敬东	易先宏	方明桥	肱骨骨折闭合复位钢针内固定术
1560	D07儿童骨科、骨盆外科	2020-06-23	2020-06-27	2991786	王梓嘉	男	8Y	桡骨下端骨折		治愈	张敬东	易先宏	李玉安	桡骨骨折切开复位钢针内固定术
1561	D07儿童骨科、骨盆外科	2020-06-02	2020-06-28	2992069	廖武松	男	57Y	开放性胫骨骨折	膝关节十字韧带扭伤;膝关节副韧带扭伤;半月板损伤;腓骨骨折	治愈	孔建中	项光恒	陈鸿亮	胫骨骨折切开复位钢板内固定术;皮肤及皮下组织清创术
1562	D07儿童骨科、骨盆外科	2020-06-18	2020-06-28	2992074	陈小春	女	56Y	胸椎骨折	腰椎间盘突出;颈椎间盘突出;骨质疏松;肝囊肿	好转	余可和	余可和	柯陈荣
1563	D07儿童骨科、骨盆外科	2020-06-22	2020-06-28	2992080	姚胤玥	女	3Y	肱骨干骨折		治愈	张敬东	易先宏	李玉安	肱骨骨折切开复位髓内针内固定术
1564	D07儿童骨科、骨盆外科	2020-06-21	2020-06-28	2992086	郑佳琪	女	5Y	尺骨桡骨远端骨折		治愈	张敬东	易先宏	李玉安	尺骨骨折闭合复位髓内针内固定术
1565	D07儿童骨科、骨盆外科	2020-06-23	2020-06-28	2992087	林圣博	男	2Y	肱骨髁上骨折		治愈	张敬东	易先宏	方明桥	肱骨骨折闭合复位钢针内固定术
1566	D07儿童骨科、骨盆外科	2020-06-12	2020-06-28	2992088	杨芬娟	女	81Y	股骨粗隆间骨折	输尿管积水;脂肪肝;高血压病;手术后恢复期;特指肾盂积水;肾盂扩张;输尿管扩张	治愈	翁益民	翁益民	翁益民	股骨骨折切开复位髓内针内固定术
1567	D07儿童骨科、骨盆外科	2020-06-20	2020-06-28	2992098	陈阿菊	女	95Y	股骨颈骨折	手术后恢复期;肝囊肿;单纯性肾囊肿	治愈	翁益民	翁益民	翁益民	股骨骨折闭合复位螺钉内固定术
1568	D07儿童骨科、骨盆外科	2020-06-25	2020-06-29	2992471	李辰宇	男	1Y	腕和手水平拇指伸肌和肌腱损伤	手术后恢复期;取除骨折内固定装置	治愈	张敬东	易先宏	方明桥	手指肌腱成形术;指骨内固定物取出术
1569	D07儿童骨科、骨盆外科	2020-06-18	2020-06-29	2992491	方慧敏	女	47Y	髌骨骨折	肝钙化灶	治愈	翁益民	翁益民	翁益民	髌骨骨折切开复位螺钉内固定术
1570	D07儿童骨科、骨盆外科	2020-06-19	2020-06-29	2992492	丁振花	女	65Y	股骨颈骨折	胆囊结石;后天性肾囊肿;心血管疾病;癫痫	治愈	孔建中	项光恒	陈鸿亮	全髋关节置换术;髋关节滑膜切除术
1571	D07儿童骨科、骨盆外科	2020-06-24	2020-06-29	2992559	陈晓依	女	1Y	特指趾骨骨折	开放性足损伤	治愈	张敬东	易先宏	闫广奎	趾骨骨折切开复位螺钉内固定术;足血管、神经、肌腱探查术;皮肤及皮下组织清创术
1572	D07儿童骨科、骨盆外科	2020-06-28	2020-06-30	2993060	顾依辰	女	4Y	开放性趾损伤	特指趾骨骨折	治愈	张敬东	易先宏	闫广奎	皮肤及皮下组织清创术
1573	D07儿童骨科、骨盆外科	2020-06-24	2020-07-01	2993097	马小秋	女	51Y	股骨颈骨折		治愈	孔建中	项光恒	陈鸿亮	股骨骨折闭合复位螺钉内固定术
1574	D07儿童骨科、骨盆外科	2020-06-21	2020-07-01	2993099	徐玲杏	女	82Y	股骨粗隆间骨折	人工膝关节;手术后恢复期;肝囊肿;胆囊结石	治愈	孔建中	项光恒	陈鸿亮	股骨骨折切开复位钢针内固定术
1575	D07儿童骨科、骨盆外科	2020-06-24	2020-07-01	2993100	马秀芹	女	53Y	股骨颈骨折	下肢动脉粥样硬化;肝囊肿;胆囊息肉;高血压病	治愈	孔建中	项光恒	陈鸿亮	股骨骨折闭合复位螺钉内固定术
1576	D07儿童骨科、骨盆外科	2020-06-28	2020-07-01	2993183	陈奕涵	男	3Y	肱骨髁上骨折		治愈	张敬东	李玉安	王伟	肱骨骨折闭合复位钢针内固定术
1577	D07儿童骨科、骨盆外科	2020-06-18	2020-07-01	2993202	陈丽桃	女	55Y	肱骨下端骨折	高血压病;上臂桡神经损伤	治愈	翁益民	翁益民	翁益民	桡神经探查术;肱骨骨折切开复位钢板内固定术
1578	D07儿童骨科、骨盆外科	2020-06-18	2020-07-01	2993207	王学雁	男	38Y	股骨颈骨折	前列腺结石	治愈	翁益民	翁益民	翁益民	股骨骨折闭合复位螺钉内固定术
1579	D07儿童骨科、骨盆外科	2020-06-29	2020-07-01	2993421	汤让杰	男	11Y	桡骨颈骨折	脾大;尺骨骨折	好转	张敬东	易先宏	方明桥
1580	D07儿童骨科、骨盆外科	2020-06-23	2020-07-02	2993466	陆小雄	女	41Y	取除骨折内固定装置		其他	孔建中	项光恒	陈鸿亮	肱骨内固定物取出术
1581	D07儿童骨科、骨盆外科	2020-06-28	2020-07-02	2993650	尤新朋	男	16Y	取除骨折内固定装置		其他	翁益民	翁益民	翁益民	盆骨内固定物取出术
1582	D07儿童骨科、骨盆外科	2020-06-27	2020-07-02	2993687	张萍萍	女	11Y	桡骨颈骨折		治愈	张敬东	易先宏	方明桥	桡骨骨折切开复位钢针内固定术
1583	D07儿童骨科、骨盆外科	2020-06-26	2020-07-03	2993832	张智恒	男	2Y	股骨干骨折		治愈	张敬东	易先宏	闫广奎	股骨骨折闭合复位术
1584	D07儿童骨科、骨盆外科	2020-06-22	2020-07-03	2993836	陈萌	男	20Y	胫腓骨干骨折	多发性小腿浅表损伤	治愈	孔建中	项光恒	陈鸿亮	腓骨骨折闭合复位髓内针内固定术;胫骨骨折切开复位螺钉内固定术
1585	D07儿童骨科、骨盆外科	2020-06-13	2020-07-04	2993903	李朋	男	30Y	股骨干骨折	开放性膝部损伤;内踝骨折;髂骨骨折	治愈	孔建中	项光恒	陈鸿亮	股骨骨折切开复位钢板内固定术
1586	D07儿童骨科、骨盆外科	2020-06-27	2020-07-04	2993945	周知博	男	5Y	胫腓骨干骨折		治愈	张敬东	易先宏	方明桥	胫骨骨折闭合复位髓内针内固定术
1587	D07儿童骨科、骨盆外科	2020-06-29	2020-07-04	2993950	林其铭	男	4Y	肱骨外髁骨折		治愈	张敬东	易先宏	方明桥	肱骨骨折切开复位钢针内固定术
1588	D07儿童骨科、骨盆外科	2020-06-28	2020-07-04	2993958	柯博文	男	6Y	胫腓骨下端骨折		治愈	张敬东	易先宏	方明桥	胫骨骨折闭合复位术
1589	D07儿童骨科、骨盆外科	2020-06-29	2020-07-04	2993966	陈则通	男	79Y	取除骨折内固定装置	单纯性肾囊肿;高血压病	其他	翁益民	翁益民	翁益民	髌骨内固定物取出术
1590	D07儿童骨科、骨盆外科	2020-06-17	2020-07-04	2993967	张胜金	男	39Y	髂骨骨折	肋骨骨折;髋臼骨折;肾结石;脂肪肝;胆囊结石	治愈	翁益民	翁益民	翁益民	髂骨骨折切开复位钢板内固定术
1591	D07儿童骨科、骨盆外科	2020-06-24	2020-07-04	2994025	刘太春	男	42Y	股骨粗隆间骨折		治愈	孔建中	项光恒	陈鸿亮	股骨骨折闭合复位螺钉内固定术
1592	D07儿童骨科、骨盆外科	2020-06-19	2020-07-05	2994373	陈荣化	男	42Y	股骨颈骨折	面部软组织挫伤;前列腺结石;股骨骨折;髌骨骨折;脊髓灰质炎后遗症;内侧半月板后脚损伤;脂肪肝	治愈	翁益民	翁益民	翁益民	股骨骨折切开复位钢针内固定术;股骨骨折闭合复位钢针内固定术;髌骨骨折切开复位螺钉内固定术
1593	D07儿童骨科、骨盆外科	2020-06-18	2020-07-05	2994379	樊和平	男	44Y	胫骨骨干骨折	趾骨良性肿瘤;膝关节副韧带扭伤;胫骨骨折;小腿浅表损伤;膝关节积液	治愈	翁益民	翁益民	翁益民	胫骨骨折切开复位钢针内固定术
1594	D07儿童骨科、骨盆外科	2020-06-22	2020-07-05	2994392	郭光辉	男	82Y	髌骨骨折	脂肪肝;肾结石;肝囊肿;前列腺增生;胆囊结石;单纯性肾囊肿;高血压病	治愈	孔建中	项光恒	陈鸿亮	股四头肌成形术;髌骨骨折切开复位张力带钢丝内固定术
1595	D07儿童骨科、骨盆外科	2020-06-28	2020-07-05	2994432	周铭涵	女	7Y	胫骨骨折		治愈	张敬东	易先宏	闫广奎	胫骨骨折切开复位钢针内固定术
1596	D07儿童骨科、骨盆外科	2020-06-28	2020-07-05	2994435	俞灵潇	男	12Y	桡骨下端骨折	前臂尺神经损伤	治愈	张敬东	易先宏	闫广奎	尺骨骨折切开复位钢针内固定术;桡骨骨折切开复位钢针内固定术
1597	D07儿童骨科、骨盆外科	2020-07-03	2020-07-05	2994439	吕林锹	男	7Y	肱骨髁上骨折		治愈	张敬东	易先宏	方明桥	肱骨骨折闭合复位钢针内固定术
1598	D07儿童骨科、骨盆外科	2020-06-24	2020-07-05	2994446	黄林香	女	93Y	股骨颈骨折		治愈	孔建中	项光恒	陈鸿亮	股骨骨折闭合复位螺钉内固定术
1599	D07儿童骨科、骨盆外科	2020-06-29	2020-07-06	2994709	陈永林	男	48Y	胫骨骨折	乙型病毒性肝炎	治愈	孔建中	项光恒	陈鸿亮	胫骨骨折切开复位钢板内固定术
1600	D07儿童骨科、骨盆外科	2020-06-27	2020-07-06	2994724	钱彩芬	女	58Y	肱骨上端骨折	甲状腺结节	治愈	孔建中	项光恒	陈鸿亮	肩袖修补术;肱骨骨折切开复位钢板内固定术
1601	D07儿童骨科、骨盆外科	2020-07-02	2020-07-06	2994835	周子顺	男	5Y	肱骨外髁骨折		治愈	张敬东	易先宏	方明桥	肱骨骨折切开复位钢针内固定术
1602	D07儿童骨科、骨盆外科	2020-07-01	2020-07-06	2994839	李德鸿	男	5Y	髂骨骨折	多处浅表损伤	好转	张敬东	李玉安	闫广奎
1603	D07儿童骨科、骨盆外科	2020-07-01	2020-07-06	2994848	郑德	男	10Y	肱骨外科颈骨折		治愈	张敬东	易先宏	王伟	肱骨骨折闭合复位髓内针内固定术
1604	D07儿童骨科、骨盆外科	2020-07-02	2020-07-06	2994850	杨立恒	男	1Y	肱骨髁上骨折		治愈	张敬东	易先宏	王伟	肱骨骨折闭合复位钢针内固定术
1605	D07儿童骨科、骨盆外科	2020-06-29	2020-07-06	2994865	王荷花	女	46Y	股骨颈骨折		治愈	翁益民	翁益民	翁益民	股骨骨折闭合复位螺钉内固定术
1606	D07儿童骨科、骨盆外科	2020-06-19	2020-07-06	2994866	陈明星	男	16Y	开放性胫腓骨下端骨折	跟腱断裂;趾肌腱断裂;踝和足水平特指血管损伤;足部皮肤撕裂伤;小腿水平多发性肌腱损伤;小腿水平特指神经损伤	治愈	翁益民	翁益民	翁益民	胫骨骨折切开复位钢板内固定术;肌腱、血管、神经探查术
1607	D07儿童骨科、骨盆外科	2020-07-05	2020-07-07	2995150	叶雨红	女	77Y	股骨粗隆间骨折	老年性痴呆;贫血;大便失禁;肾功能异常;2型糖尿病;高血压病	好转	孔建中	陈鸿亮	项光恒
1608	D07儿童骨科、骨盆外科	2020-07-04	2020-07-07	2995152	高前程	男	14Y	取除骨折内固定装置		其他	张敬东	易先宏	方明桥	锁骨内固定物取出术
1609	D07儿童骨科、骨盆外科	2020-07-04	2020-07-07	2995153	李智炫	男	6Y	取除骨折内固定装置		其他	张敬东	易先宏	方明桥	桡骨内固定物取出术
1610	D07儿童骨科、骨盆外科	2020-06-29	2020-07-07	2995154	张以勒	男	2Y	股骨干骨折		治愈	张敬东	易先宏	闫广奎	股骨骨折闭合复位术
1611	D07儿童骨科、骨盆外科	2020-07-05	2020-07-07	2995161	潘江胜	男	3Y	肱骨下端骨折		治愈	张敬东	易先宏	毛诚晃	肱骨骨折切开复位钢针内固定术
1612	D07儿童骨科、骨盆外科	2020-07-04	2020-07-07	2995201	包高滔	男	14Y	取除骨折内固定装置		其他	张敬东	易先宏	毛诚晃	桡骨内固定物取出术
1613	D07儿童骨科、骨盆外科	2020-07-04	2020-07-07	2995203	潘鑫博	男	8Y	取除骨折内固定装置		其他	张敬东	易先宏	毛诚晃	尺骨内固定物取出术
1614	D07儿童骨科、骨盆外科	2020-07-05	2020-07-07	2995217	周欣怡	女	9Y	取除骨折内固定装置		其他	张敬东	易先宏	毛诚晃	股骨内固定物取出术
1615	D07儿童骨科、骨盆外科	2020-07-04	2020-07-07	2995375	欧思雨	女	7Y	取除骨折内固定装置		其他	张敬东	易先宏	方明桥	股骨内固定物取出术
1616	D07儿童骨科、骨盆外科	2020-07-04	2020-07-08	2995540	孙龙彬	男	14Y	取除骨折内固定装置		其他	张敬东	易先宏	毛诚晃	胫骨内固定物取出术
1617	D07儿童骨科、骨盆外科	2020-07-05	2020-07-08	2995542	苏凌特	男	15Y	取除骨折内固定装置		其他	张敬东	易先宏	毛诚晃	桡骨内固定物取出术
1618	D07儿童骨科、骨盆外科	2020-07-05	2020-07-08	2995543	项锦晨	男	12Y	取除骨折内固定装置		其他	张敬东	易先宏	毛诚晃	肩锁关节内固定物取出术
1619	D07儿童骨科、骨盆外科	2020-06-29	2020-07-09	2995968	李秀兰	女	60Y	骨折迟延愈合	高血压病;手术后随诊检查;脂肪肝	治愈	孔建中	陈鸿亮	项光恒	锁骨骨折切开复位螺钉内固定术;髂骨取骨术;锁骨植骨术
1620	D07儿童骨科、骨盆外科	2020-05-28	2020-07-09	2995999	林良弟	男	66Y	骨盆骨折	下肢浅表损伤;特指肾盂积水;肺特指疾患;陈旧性肋骨骨折;髋关节脱位;耻骨骨折;腰椎峡部裂;肺部感染;胸腔积液;肺大泡;下肢静脉曲张	治愈	翁益民	翁益民	翁益民	同种皮肤移植术;股骨牵引;骨盆骨折切开复位钢针内固定术;皮肤及皮下组织清创术
1621	D07儿童骨科、骨盆外科	2020-07-07	2020-07-09	2996030	吴娜	女	5Y	取除骨折内固定装置		其他	张敬东	易先宏	闫广奎	胫骨内固定物取出术
1622	D07儿童骨科、骨盆外科	2020-07-05	2020-07-11	2995866	杨一帆	男	3Y	取除骨折内固定装置		其他	翁益民	翁益民	翁益民	股骨内固定物取出术
1623	D07儿童骨科、骨盆外科	2020-07-07	2020-07-11	2996320	查永迪	男	6Y	肱骨髁上骨折	上肢神经损伤	治愈	张敬东	李玉安	闫广奎	肱骨骨折切开复位钢针内固定术
1624	D07儿童骨科、骨盆外科	2020-06-28	2020-07-11	2996321	孙青力	男	31Y	桡骨骨折		治愈	孔建中	陈鸿亮	项光恒	桡骨骨折切开复位钢板内固定术
1625	D07儿童骨科、骨盆外科	2020-06-21	2020-07-11	2996327	余仕华	男	53Y	跟骨骨折		治愈	翁益民	翁益民	翁益民	跟骨骨折切开复位钢板内固定术
1626	D07儿童骨科、骨盆外科	2020-07-07	2020-07-11	2996336	唐文飞	男	7Y	取除骨折内固定装置		其他	张敬东	易先宏	方明桥	胫骨内固定物取出术
1627	D07儿童骨科、骨盆外科	2020-07-07	2020-07-11	2996348	郑昊	男	16Y	取除骨折内固定装置		其他	张敬东	易先宏	闫广奎	股骨内固定物取出术
1628	D07儿童骨科、骨盆外科	2020-07-07	2020-07-11	2996369	姬非凡	女	10Y	取除骨折内固定装置		其他	张敬东	易先宏	毛诚晃	肱骨内固定物取出术
1629	D07儿童骨科、骨盆外科	2020-07-07	2020-07-11	2996373	谢秀淮	男	15Y	取除骨折内固定装置		其他	张敬东	易先宏	闫广奎	股骨内固定物取出术
1630	D07儿童骨科、骨盆外科	2020-07-07	2020-07-11	2996455	董希周	男	67Y	股骨颈骨折	特指手术后状态;胆囊息肉;高血压病;肾结石	好转	孔建中	陈鸿亮	项光恒
1631	D07儿童骨科、骨盆外科	2020-07-03	2020-07-11	2996468	彭奔南	男	20Y	陈旧性腓骨骨折	内踝骨折	治愈	孔建中	陈鸿亮	项光恒	踝关节骨折切开复位钢针内固定术;腓骨骨折切开复位钢板内固定术
1632	D07儿童骨科、骨盆外科	2020-06-24	2020-07-12	2996720	吴春芳	女	68Y	股骨颈骨折	下肢动脉粥样硬化;高血压病;2型糖尿病	治愈	孔建中	陈鸿亮	项光恒	全髋关节置换术
1633	D07儿童骨科、骨盆外科	2020-07-06	2020-07-12	2996744	陈伟杰	男	7Y	肱骨外科颈骨折	多处浅表损伤	治愈	张敬东	易先宏	毛诚晃	肱骨骨折闭合复位钢针内固定术
1634	D07儿童骨科、骨盆外科	2020-07-07	2020-07-12	2996748	王卓	男	8Y	肱骨髁上骨折		治愈	张敬东	易先宏	方明桥	肱骨骨折闭合复位钢针内固定术
1635	D07儿童骨科、骨盆外科	2020-07-07	2020-07-12	2996752	冯思豪	男	7Y	尺骨桡骨骨干骨折		治愈	张敬东	易先宏	方明桥	尺骨骨折切开复位钢针内固定术
1636	D07儿童骨科、骨盆外科	2020-07-09	2020-07-12	2996754	程黎昕	男	3Y	肱骨外髁骨折		治愈	张敬东	易先宏	闫广奎
1637	D07儿童骨科、骨盆外科	2020-07-09	2020-07-12	2996756	陈亦静	女	4Y	肱骨髁上骨折		治愈	张敬东	易先宏	闫广奎	肱骨骨折切开复位钢针内固定术
1638	D07儿童骨科、骨盆外科	2020-07-09	2020-07-13	2997087	王磊	男	6Y	肱骨髁上骨折		治愈	张敬东	易先宏	方明桥	肱骨骨折闭合复位钢针内固定术
1639	D07儿童骨科、骨盆外科	2020-07-10	2020-07-13	2997092	章国涵	男	7Y	肱骨上端骨折	腹水	治愈	张敬东	易先宏	毛诚晃	肱骨骨折切开复位髓内针内固定术
1640	D07儿童骨科、骨盆外科	2020-07-09	2020-07-13	2997093	陈晨	男	4Y	肱骨髁上骨折		治愈	张敬东	易先宏	方明桥	肱骨骨折闭合复位钢针内固定术
1641	D07儿童骨科、骨盆外科	2020-07-07	2020-07-13	2997097	邹艺杰	男	6Y	肱骨髁上骨折		治愈	张敬东	易先宏	方明桥	肱骨骨折闭合复位钢针内固定术
1642	D07儿童骨科、骨盆外科	2020-07-04	2020-07-13	2997107	刘健	男	39Y	髌骨骨折	特指手术后状态	治愈	孔建中	陈鸿亮	项光恒	髌骨骨折切开复位张力带钢丝内固定术;股四头肌成形术;髌骨开放性骨折清创术
1643	D07儿童骨科、骨盆外科	2020-07-09	2020-07-13	2997244	高依蕊	女	12Y	开放性胫腓骨下端骨折	下肢特指损伤	治愈	张敬东	易先宏	方明桥	胫骨钢针内固定术
1644	D07儿童骨科、骨盆外科	2020-07-01	2020-07-13	2997297	项爱兰	女	53Y	外踝骨折	胫骨下端骨折	治愈	孔建中	陈鸿亮	项光恒	踝关节骨折切开复位钢板内固定术;胫骨骨折切开复位螺钉内固定术
1645	D07儿童骨科、骨盆外科	2020-07-04	2020-07-14	2997412	陈月兰	女	68Y	股骨骨折	高血压病	治愈	孔建中	陈鸿亮	项光恒	股骨骨折切开复位钢板内固定术
1646	D07儿童骨科、骨盆外科	2020-07-06	2020-07-14	2997420	胡银娒	男	90Y	股骨颈骨折	高血压病	治愈	翁益民	翁益民	翁益民	人工股骨头置换术
1647	D07儿童骨科、骨盆外科	2020-07-08	2020-07-14	2997421	陈城成	男	3Y	肱骨外髁骨折		治愈	张敬东	易先宏	闫广奎	肱骨骨折切开复位钢针内固定术
1648	D07儿童骨科、骨盆外科	2020-07-09	2020-07-14	2997526	金朝超	男	3Y	开放性指骨骨折	特指单个手指部分或完全切断;特指手指指神经损伤	治愈	张敬东	易先宏	闫广奎	指骨骨折切开复位钢针内固定术;手清创术;指神经吻合术
1649	D07儿童骨科、骨盆外科	2020-07-11	2020-07-15	2997855	赵秀兰	女	62Y	取除骨折内固定装置		其他	孔建中	陈鸿亮	项光恒	肱骨内固定物取出术
1650	D07儿童骨科、骨盆外科	2020-07-06	2020-07-15	2997857	李双清	男	41Y	锁骨骨折	手术后随诊检查	治愈	孔建中	陈鸿亮	项光恒	锁骨骨折切开复位钢板内固定术;锁骨植骨术
1651	D07儿童骨科、骨盆外科	2020-06-30	2020-07-15	2997864	陈美琳	女	14Y	取除骨折内固定装置	手术后切口感染	其他	张敬东	易先宏	李玉安	皮肤及皮下组织清创术;髌骨内固定物取出术
1652	D07儿童骨科、骨盆外科	2020-07-03	2020-07-16	2998281	赵赛萍	女	55Y	股骨粗隆间骨折	桡骨下端骨折;肾结石	治愈	翁益民	翁益民	翁益民	股骨骨折闭合复位髓内针内固定术
1653	D07儿童骨科、骨盆外科	2020-07-12	2020-07-16	2998370	潘一昭	男	6Y	取除骨折内固定装置		其他	张敬东	易先宏	方明桥	胫骨内固定物取出术
1654	D07儿童骨科、骨盆外科	2020-07-14	2020-07-17	2998501	朱家乐	女	5Y	肱骨髁上骨折		治愈	张敬东	易先宏	毛诚晃	肱骨骨折闭合复位钢针内固定术
1655	D07儿童骨科、骨盆外科	2020-07-12	2020-07-18	2998782	胡鑫鹏	男	11Y	取除骨折内固定装置		其他	张敬东	易先宏	毛诚晃	股骨内固定物取出术
1656	D07儿童骨科、骨盆外科	2020-07-11	2020-07-18	2998783	吴剑秋	女	54Y	取除骨折内固定装置		其他	孔建中	陈鸿亮	项光恒	踝关节内固定物取出术
1657	D07儿童骨科、骨盆外科	2020-07-11	2020-07-18	2998784	刘嘉宸	男	13Y	骨折畸形愈合	取除骨折内固定装置	治愈	张敬东	易先宏	闫广奎	石膏绷带固定;尺骨内固定物取出术;尺骨骨折切开复位髓内针内固定术
1658	D07儿童骨科、骨盆外科	2020-07-13	2020-07-18	2998788	朱杭	男	3Y	股骨干骨折		治愈	张敬东	易先宏	闫广奎	股骨骨折闭合复位术
1659	D07儿童骨科、骨盆外科	2020-07-13	2020-07-18	2998790	王家钧	男	3Y	肱骨外髁骨折		治愈	张敬东	易先宏	方明桥	肱骨骨折切开复位钢针内固定术
1660	D07儿童骨科、骨盆外科	2020-07-13	2020-07-18	2998801	姚辰毅	男	1Y	肱骨外髁骨折		治愈	张敬东	易先宏	方明桥	肱骨骨折切开复位钢针内固定术
1661	D07儿童骨科、骨盆外科	2020-07-13	2020-07-18	2998811	方秭源	女	6Y	肱骨外髁骨折		治愈	张敬东	易先宏	王伟	肱骨骨折切开复位钢针内固定术
1662	D07儿童骨科、骨盆外科	2020-07-08	2020-07-18	2998813	罗贵川	男	7Y	肱骨髁上骨折	急性化脓性扁桃体炎	治愈	张敬东	易先宏	王伟	肱骨骨折闭合复位钢针内固定术
1663	D07儿童骨科、骨盆外科	2020-07-07	2020-07-18	2998823	许有仰	男	67Y	股骨粗隆间骨折	前列腺结石;糖尿病;下肢静脉曲张;前列腺增生;肾结石;下肢动脉粥样硬化	治愈	孔建中	陈鸿亮	项光恒	股骨骨折闭合复位钢针内固定术
1664	D07儿童骨科、骨盆外科	2020-06-30	2020-07-18	2998827	杜举会	女	19Y	开放性胫腓骨干骨折	硬膜下血肿;硬膜下出血;皮肤挫伤;头皮血肿;脑挫伤;枕骨骨折	治愈	孔建中	陈鸿亮	项光恒	胫骨骨折切开复位钢针内固定术;腓骨骨折切开复位髓内针内固定术
1665	D07儿童骨科、骨盆外科	2020-07-10	2020-07-18	2998994	刘俊	女	31Y	骨盆骨折	跖骨骨折;跟骨骨折;肺挫伤;面部挫伤;髋臼骨折;踝关节半脱位;距骨骨折;足舟状骨骨折;腰椎骨折;尺骨桡骨远端骨折;下肢静脉血栓形成;骶骨骨折;耻骨骨折;股骨干骨折;外踝骨折;失血性休克;多发性肋骨骨折	好转	翁益民	翁益民	郭蕾	髂内动脉栓塞术
1666	D07儿童骨科、骨盆外科	2020-06-23	2020-07-18	2999018	林显乐	男	45Y	开放性内踝骨折	单纯性肾囊肿	治愈	孔建中	陈鸿亮	项光恒	踝关节骨折切开复位钢针内固定术;肌腱成形术;胫神经探查术;腱鞘缝合术
1667	D07儿童骨科、骨盆外科	2020-07-17	2020-07-19	2999097	邵若涵	女	5Y	尺骨骨折	桡骨头脱位;桡神经损害	治愈	张敬东	易先宏	方明桥
1668	D07儿童骨科、骨盆外科	2020-07-15	2020-07-19	2999098	金诗越	男	5Y	肱骨髁上骨折		好转	张敬东	易先宏	闫广奎
1669	D07儿童骨科、骨盆外科	2020-07-11	2020-07-19	2999131	石春丽	女	13Y	取除骨折内固定装置		其他	张敬东	易先宏	毛诚晃	肱骨内固定物取出术
1670	D07儿童骨科、骨盆外科	2020-07-17	2020-07-19	2999133	黄于萁	女	3Y	肱骨髁上骨折		治愈	张敬东	易先宏	方明桥	肱骨骨折闭合复位钢针内固定术
1671	D07儿童骨科、骨盆外科	2020-07-13	2020-07-19	2999443	刘瑶珊	男	28Y	掌骨骨折	肝钙化灶;前列腺结石	治愈	翁益民	翁益民	翁益民	掌骨骨折切开复位钢针内固定术
1672	D07儿童骨科、骨盆外科	2020-07-09	2020-07-20	2999536	谢建东	男	39Y	股骨颈骨折	肝回声不均;单纯性肾囊肿;肝血管瘤;肾钙化;胆囊息肉;肝囊肿	治愈	翁益民	翁益民	翁益民	肱骨骨折闭合复位钢针内固定术
1673	D07儿童骨科、骨盆外科	2020-07-11	2020-07-20	2999540	郭林段	女	85Y	股骨颈骨折	2型糖尿病	治愈	翁益民	翁益民	翁益民	人工股骨头置换术
1674	D07儿童骨科、骨盆外科	2020-07-11	2020-07-20	2999545	朱杰	男	48Y	股骨颈骨折	高血压病;肾移植状态	治愈	翁益民	翁益民	翁益民	股骨骨折闭合复位钢针内固定术
1675	D07儿童骨科、骨盆外科	2020-07-14	2020-07-21	2999878	刘宇宸	男	6Y	尺骨骨折	桡骨头脱位	治愈	张敬东	易先宏	闫广奎	尺骨骨折切开复位钢板内固定术
1676	D07儿童骨科、骨盆外科	2020-06-28	2020-07-21	2999931	王会迪	男	57Y	胫骨骨折	腓骨骨折;多发性小腿浅表损伤	治愈	翁益民	翁益民	翁益民
1677	D07儿童骨科、骨盆外科	2020-07-05	2020-07-21	3000033	叶海勇	男	42Y	股骨骨折	胸椎骨折;肺特指疾患;肾结石	治愈	孔建中	陈鸿亮	项光恒	股骨外固定术;股骨骨折切开复位钢针内固定术
1678	D07儿童骨科、骨盆外科	2020-07-08	2020-07-22	3000244	金陈杰	男	12Y	跟骨骨折	桡骨下端骨折;胸壁浅表损伤;外踝骨折	治愈	张敬东	易先宏	闫广奎	跟骨骨折切开复位钢板内固定术
1679	D07儿童骨科、骨盆外科	2020-07-12	2020-07-22	3000265	王少华	男	60Y	股骨粗隆间骨折	下肢动脉粥样硬化;高血压病;单纯性肾囊肿;前列腺结石;下肢静脉血栓形成	治愈	孔建中	陈鸿亮	项光恒	股骨骨折切开复位钢针内固定术
1680	D07儿童骨科、骨盆外科	2020-07-09	2020-07-22	3000270	赵莉花	女	53Y	髌骨骨折	高血压病	治愈	翁益民	翁益民	翁益民	髌骨骨折切开复位螺钉内固定术
1681	D07儿童骨科、骨盆外科	2020-07-21	2020-07-23	3000722	周宇昊	男	11Y	取除骨折内固定装置		其他	张敬东	易先宏	毛诚晃	肱骨内固定物取出术
1682	D07儿童骨科、骨盆外科	2020-07-20	2020-07-23	3000729	吴柯逸	男	15Y	取除骨折内固定装置		其他	翁益民	翁益民	翁益民	胫骨内固定物取出术
1683	D07儿童骨科、骨盆外科	2020-07-20	2020-07-23	3000750	张传	男	3Y	尺骨骨折	桡骨头脱位	治愈	张敬东	易先宏	闫广奎	尺骨骨折切开复位钢针内固定术
1684	D07儿童骨科、骨盆外科	2020-07-16	2020-07-25	3001104	赵晟辉	男	4Y	开放性手部损伤	指骨骨折	治愈	张敬东	易先宏	闫广奎	手清创术
1685	D07儿童骨科、骨盆外科	2020-07-16	2020-07-25	3001129	兰佳羲	男	1Y	股骨骨折		治愈	张敬东	易先宏	方明桥	股骨骨折闭合复位术;石膏绷带固定
1686	D07儿童骨科、骨盆外科	2020-07-18	2020-07-25	3001171	黄唐娒	男	65Y	取除骨折内固定装置	高血压病;单纯性肾囊肿;肺特指疾患	其他	孔建中	陈鸿亮	项光恒	踝关节内固定物取出术
1687	D07儿童骨科、骨盆外科	2020-07-18	2020-07-25	3001259	吴招格	男	65Y	骨盆骨折	多发性肋骨骨折;手术后恢复期;下肢静脉血栓形成;吸入性肺炎	治愈	孔建中	陈鸿亮	项光恒	骨盆骨折切开复位钢针内固定术
1688	D07儿童骨科、骨盆外科	2020-07-21	2020-07-26	3001520	刘一诺	男	1Y	肱骨髁上骨折	骺脱离	治愈	张敬东	易先宏	方明桥	肱骨骨折闭合复位钢针内固定术
1689	D07儿童骨科、骨盆外科	2020-07-12	2020-07-26	3001567	薛化璋	男	59Y	股骨骨折	特指趾骨骨折;头部外伤;肺挫伤;肋骨骨折;胸腔积液	治愈	孔建中	陈鸿亮	项光恒	股骨骨折切开复位钢针内固定术;股骨植骨术
1690	D07儿童骨科、骨盆外科	2020-07-21	2020-07-26	3001573	陈雨晴	女	8Y	桡骨颈骨折	鹰嘴骨折	治愈	张敬东	易先宏	闫广奎	桡骨骨折切开复位钢针内固定术
1691	D07儿童骨科、骨盆外科	2020-07-20	2020-07-26	3001576	何茂林	男	15Y	尺骨骨折	桡骨头脱位	治愈	张敬东	易先宏	闫广奎	尺骨骨折切开复位钢针内固定术
1692	D07儿童骨科、骨盆外科	2020-07-24	2020-07-26	3001615	潘齐泽	男	12Y	取除骨折内固定装置		其他	张敬东	易先宏	毛诚晃	尺骨内固定物取出术
1693	D07儿童骨科、骨盆外科	2020-07-22	2020-07-26	3001620	周小宝	男	6Y	肱骨髁上骨折		治愈	张敬东	易先宏	李玉安	肱骨骨折闭合复位钢针内固定术
1694	D07儿童骨科、骨盆外科	2020-07-16	2020-07-27	3001571	钱阿竹	女	86Y	股骨粗隆间骨折	特指手术后状态;下肢动脉粥样硬化;肺动脉高压轻度;肺部感染	治愈	孔建中	陈鸿亮	项光恒	股骨骨折闭合复位钢针内固定术
1695	D07儿童骨科、骨盆外科	2020-07-14	2020-07-27	3001902	赖顺良	男	66Y	股骨粗隆间骨折	下肢动脉粥样硬化;高血压病;单纯性肾囊肿;糖尿病	治愈	孔建中	陈鸿亮	项光恒	股骨骨折闭合复位钢针内固定术
1696	D07儿童骨科、骨盆外科	2020-07-20	2020-07-28	3002261	赵佳琪	女	1Y	股骨骨折		治愈	张敬东	易先宏	闫广奎	股骨骨折闭合复位钢针内固定术
1697	D07儿童骨科、骨盆外科	2020-07-13	2020-07-28	3002262	孙静茹	女	3Y	股骨干骨折	多处浅表损伤;骨盆骨折	治愈	张敬东	易先宏	方明桥	股骨骨折闭合复位钢针内固定术
1698	D07儿童骨科、骨盆外科	2020-07-24	2020-07-28	3002264	黄家俊	男	5Y	肱骨外髁骨折		治愈	张敬东	易先宏	方明桥	肱骨骨折切开复位钢针内固定术
1699	D07儿童骨科、骨盆外科	2020-07-23	2020-07-28	3002269	刘天宇	男	8Y	胫骨骨折	膝关节十字韧带扭伤;骨盆软组织损伤;小腿挫伤	治愈	张敬东	易先宏	方明桥	胫骨骨折闭合复位螺钉内固定术;膝关节镜检查;膝关节滑膜切除术
1700	D07儿童骨科、骨盆外科	2020-07-19	2020-07-28	3002271	黄良健	男	6Y	胫腓骨干骨折	腓神经损害	治愈	张敬东	易先宏	毛诚晃	胫骨骨折切开复位钢针内固定术
1701	D07儿童骨科、骨盆外科	2020-07-14	2020-07-28	3002287	涂志德	男	70Y	髌骨骨折	腰椎间盘退行性病变;颈椎退行性病变;下肢动脉粥样硬化;膝关节病	治愈	孔建中	陈鸿亮	项光恒	髌骨骨折切开复位螺钉内固定术
1702	D07儿童骨科、骨盆外科	2020-07-23	2020-07-29	3002626	蔡藕生	女	50Y	取除骨折内固定装置		其他	孔建中	陈鸿亮	项光恒	髌骨内固定物取出术
1703	D07儿童骨科、骨盆外科	2020-07-07	2020-07-29	3002630	洪玉丽	女	47Y	胫骨骨折	慢性胃炎;脂肪肝	治愈	孔建中	陈鸿亮	项光恒	胫骨骨折切开复位钢针内固定术
1704	D07儿童骨科、骨盆外科	2020-07-25	2020-07-29	3002631	李奕成	男	5Y	肱骨髁上骨折		治愈	张敬东	易先宏	方明桥	肱骨骨折切开复位钢针内固定术
1705	D07儿童骨科、骨盆外科	2020-06-28	2020-07-29	3002633	李梓研	男	3Y	足拇长伸肌腱断裂	足部皮肤撕裂伤;开放性足损伤;胫腓骨干骨折	治愈	张敬东	易先宏	毛诚晃	足肌腱成形术;皮肤及皮下组织清创术;同种皮肤移植术
1706	D07儿童骨科、骨盆外科	2020-07-26	2020-07-29	3002634	宋叶嘉	女	7Y	取除骨折内固定装置		其他	张敬东	易先宏	方明桥	股骨内固定物取出术
1707	D07儿童骨科、骨盆外科	2020-07-26	2020-07-31	3003303	於素兰	女	58Y	取除骨折内固定装置	高血压病	其他	翁益民	翁益民	翁益民	髌骨内固定物取出术
1708	D07儿童骨科、骨盆外科	2020-07-26	2020-07-31	3003315	周杰	男	29Y	取除骨折内固定装置	肾结石;前列腺结石;脂肪肝	其他	翁益民	翁益民	翁益民	桡骨内固定物取出术
1709	D07儿童骨科、骨盆外科	2020-07-04	2020-08-01	3002260	蒋春风	女	41Y	开放性跟骨骨折		治愈	孔建中	陈鸿亮	项光恒	跟腱修补术;跟骨骨折切开复位钢针内固定术
1710	D07儿童骨科、骨盆外科	2020-07-13	2020-08-01	3003499	黄彩弟	女	75Y	尺骨桡骨骨干骨折	肝损伤;老年性脑萎缩;下肢静脉血栓形成;肝囊肿;肾错构瘤;内踝骨折;距骨骨折;多发性肋骨骨折;单纯性肾囊肿	治愈	孔建中	孔建中	项光恒	桡骨骨折切开复位螺钉内固定术;尺骨骨折切开复位螺钉内固定术
1711	D07儿童骨科、骨盆外科	2020-06-27	2020-08-01	3003503	刘文帅	男	5Y	特指趾骨骨折	足挫伤;创伤后趾骨坏死;骨筋膜室综合征	治愈	张敬东	易先宏	方明桥	趾截断术;趾骨骨折切开复位钢针内固定术
1712	D07儿童骨科、骨盆外科	2020-07-21	2020-08-01	3003506	张紫琪	女	8Y	外踝骨折		治愈	张敬东	易先宏	闫广奎	踝关节骨折切开复位钢针内固定术
1713	D07儿童骨科、骨盆外科	2020-07-28	2020-08-01	3003508	吴昌卫	男	14Y	取除骨折内固定装置		其他	张敬东	易先宏	方明桥	肱骨内固定物取出术
1714	D07儿童骨科、骨盆外科	2020-07-27	2020-08-01	3003513	田钰彬	男	13Y	取除骨折内固定装置		其他	张敬东	易先宏	方明桥	股骨内固定物取出术
1715	D07儿童骨科、骨盆外科	2020-07-28	2020-08-01	3003534	岑雨歆	女	1Y	肱骨外科颈骨折		治愈	张敬东	易先宏	毛诚晃	肱骨骨折切开复位钢针内固定术
1716	D07儿童骨科、骨盆外科	2020-07-28	2020-08-01	3003541	杨广林	男	13Y	取除骨折内固定装置		其他	张敬东	易先宏	闫广奎	盆骨内固定物取出术
1717	D07儿童骨科、骨盆外科	2020-07-27	2020-08-01	3003547	季中海	男	47Y	内踝骨折	前列腺结石;脂肪肝	治愈	翁益民	翁益民	翁益民	踝关节骨折切开复位钢针内固定术
1718	D07儿童骨科、骨盆外科	2020-07-15	2020-08-01	3003626	方一航	男	10Y	胫腓骨干骨折	下肢皮肤套脱伤;多处浅表损伤	治愈	张敬东	易先宏	闫广奎	皮肤和皮下组织切开引流术;胫骨骨折闭合复位螺钉内固定术;皮肤及皮下组织清创术
1719	D07儿童骨科、骨盆外科	2020-07-09	2020-08-01	3003779	黄信军	男	33Y	胫腓骨干骨折	内侧半月板后脚损伤;外侧半月板损伤;膝关节副韧带扭伤;胫骨骨折;下肢皮肤撕裂伤	治愈	翁益民	翁益民	翁益民	胫骨骨折切开复位钢针内固定术
1720	D07儿童骨科、骨盆外科	2020-07-29	2020-08-02	3003927	虞名赫	男	10Y	取除骨折内固定装置		其他	张敬东	易先宏	毛诚晃	锁骨内固定物取出术
1721	D07儿童骨科、骨盆外科	2020-07-28	2020-08-02	3003943	戚栩榮	男	8Y	取除骨折内固定装置		其他	张敬东	易先宏	闫广奎	肱骨内固定物取出术
1722	D07儿童骨科、骨盆外科	2020-07-21	2020-08-02	3003950	谢景苏	男	90Y	股骨颈骨折	特指手术后状态;下肢动脉粥样硬化;高血压病;单纯性肾囊肿	治愈	孔建中	孔建中	孔建中	人工股骨头置换术
1723	D07儿童骨科、骨盆外科	2020-07-25	2020-08-02	3003954	陈夏伊	女	2Y	足拇长伸肌腱断裂	跖骨骨折;纵隔气肿;肺挫伤;足挤压伤	治愈	张敬东	易先宏	闫广奎	足血管、神经、肌腱探查术;足屈趾屈拇肌腱延长术
1724	D07儿童骨科、骨盆外科	2020-08-02	2020-08-03	3004206	张瑶婧	女	9Y	肱骨外科颈骨折		好转	张敬东	易先宏	王伟
1725	D07儿童骨科、骨盆外科	2020-07-29	2020-08-03	3004256	支裕旦	男	13Y	取除骨折内固定装置		其他	张敬东	易先宏	方明桥	肘关节假体取出术
1726	D07儿童骨科、骨盆外科	2020-07-30	2020-08-03	3004258	钟新科	男	6Y	肱骨髁上骨折	上臂桡神经损伤	治愈	张敬东	易先宏	方明桥	桡骨骨折闭合复位钢针内固定术
1727	D07儿童骨科、骨盆外科	2020-08-01	2020-08-03	3004262	卓琳	女	1Y	肱骨髁上骨折		治愈	张敬东	易先宏	方明桥	股骨骨折闭合复位钢针内固定术
1728	D07儿童骨科、骨盆外科	2020-07-22	2020-08-03	3004377	戴依婷	女	3Y	股骨骨折	浅表损伤;肝损伤;头皮血肿;肺挫伤;踝关节脱位;肱骨骨折;胸椎骨折;腹水;急性创伤性胰腺炎，轻症;颈椎滑脱;多处挫伤	治愈	张敬东	易先宏	闫广奎	腓骨骨折闭合复位钢针内固定术;股骨骨折切开复位钢板内固定术;胫骨骨折切开复位钢针内固定术
1729	D07儿童骨科、骨盆外科	2020-08-02	2020-08-04	3004584	朱乾涛	男	11Y	取除骨折内固定装置		其他	张敬东	易先宏	方明桥	尺骨内固定物取出术
1730	D07儿童骨科、骨盆外科	2020-07-21	2020-08-04	3004602	李敏娟	女	59Y	三踝骨折	脂肪肝	好转	翁益民	翁益民	翁益民	踝关节骨折切开复位钢针内固定术
1731	D07儿童骨科、骨盆外科	2020-08-01	2020-08-04	3004606	郑启特	男	4Y	取除骨折内固定装置		其他	张敬东	易先宏	方明桥	股骨内固定物取出术
1732	D07儿童骨科、骨盆外科	2020-08-01	2020-08-04	3004608	洪东阳	男	8Y	取除骨折内固定装置		其他	张敬东	易先宏	方明桥	股骨内固定物取出术
1733	D07儿童骨科、骨盆外科	2020-08-01	2020-08-04	3004738	肖玉威	男	36Y	耻骨骨折	单纯性肾囊肿;骶骨骨折;肾结石	未愈	孔建中	孔建中	项光恒
1734	D07儿童骨科、骨盆外科	2020-08-02	2020-08-05	3004920	王珏	男	13Y	取除骨折内固定装置		其他	张敬东	易先宏	闫广奎	尺骨内固定物取出术
1735	D07儿童骨科、骨盆外科	2020-08-01	2020-08-05	3004921	童旖蕊	女	10Y	肱骨髁上骨折		治愈	张敬东	易先宏	毛诚晃	肱骨骨折切开复位钢针内固定术
1736	D07儿童骨科、骨盆外科	2020-07-26	2020-08-05	3004922	叶乐怡	女	11Y	股骨粗隆间骨折		治愈	张敬东	易先宏	闫广奎	股骨骨折切开复位钢针内固定术
1737	D07儿童骨科、骨盆外科	2020-07-20	2020-08-05	3004968	章海贞	女	44Y	股骨骨折	特指手术后状态;面部软组织挫伤;小腿开放性损伤	好转	翁益民	翁益民	翁益民	股骨骨折切开复位钢针内固定术
1738	D07儿童骨科、骨盆外科	2020-07-25	2020-08-05	3004972	林爱助	女	64Y	胫腓骨干骨折	胆囊息肉;陈旧性肺结核;骨质疏松	治愈	孔建中	孔建中	项光恒	腓骨骨折切开复位钢板内固定术;胫骨骨折切开复位钢板内固定术
1739	D07儿童骨科、骨盆外科	2020-07-23	2020-08-05	3005076	单银林	男	65Y	股骨颈骨折	2型糖尿病;肝继发恶性肿瘤;骨质疏松;肝血管瘤	治愈	孔建中	孔建中	项光恒	人工股骨头置换术
1740	D07儿童骨科、骨盆外科	2020-08-04	2020-08-06	3005405	蔡浩昌	男	14Y	取除骨折内固定装置		其他	张敬东	易先宏	闫广奎	盆骨内固定物取出术
1741	D07儿童骨科、骨盆外科	2020-08-01	2020-08-06	3005406	何爱微	女	53Y	尺骨骨折	肱骨外上髁炎;高血压病;外踝骨折	治愈	孔建中	孔建中	项光恒	肱骨骨折切开复位钢针内固定术;尺骨骨折切开复位钢针内固定术;肘关节固定术
1742	D07儿童骨科、骨盆外科	2020-07-26	2020-08-06	3005409	周如一	男	58Y	胫骨下端骨折	外踝骨折;高血压病;2型糖尿病;跖骨骨折	治愈	孔建中	孔建中	孔建中	胫骨骨折切开复位螺钉内固定术
1743	D07儿童骨科、骨盆外科	2020-08-04	2020-08-06	3005426	叶子萱	女	4Y	肱骨髁上骨折		治愈	张敬东	李玉安	毛诚晃	肱骨骨折切开复位螺钉内固定术
1744	D07儿童骨科、骨盆外科	2020-08-06	2020-08-08	3005636	潘喜苗	女	9Y	肱骨髁上骨折	上臂神经损伤	好转	张敬东	易先宏	毛诚晃
1745	D07儿童骨科、骨盆外科	2020-08-04	2020-08-08	3005688	曹海辰	男	8Y	肱骨外髁骨折		治愈	张敬东	易先宏	毛诚晃	肱骨骨折切开复位螺钉内固定术
1746	D07儿童骨科、骨盆外科	2020-07-31	2020-08-08	3005694	金佳慧	女	5Y	尺骨桡骨骨干骨折		治愈	张敬东	易先宏	闫广奎	尺骨骨折切开复位螺钉内固定术
1747	D07儿童骨科、骨盆外科	2020-08-04	2020-08-08	3005701	陈晓依	女	1Y	取除骨折内固定装置	骨折内固定装置障碍	其他	张敬东	易先宏	毛诚晃	趾骨内固定物取出术
1748	D07儿童骨科、骨盆外科	2020-07-25	2020-08-08	3005703	杨宗闹	男	48Y	跟骨骨折		治愈	孔建中	孔建中	孔建中	跟骨内固定物取出术
1749	D07儿童骨科、骨盆外科	2020-07-29	2020-08-08	3005706	王羽彤	女	7Y	腓骨骨折	胫腓关节近端脱位;踝关节脱位	治愈	张敬东	易先宏	毛诚晃	腓骨骨折切开复位钢针内固定术;踝关节脱位切开复位术
1750	D07儿童骨科、骨盆外科	2020-08-02	2020-08-08	3005717	吴柏瑶	女	3Y	肱骨外髁骨折		治愈	张敬东	易先宏	毛诚晃	肱骨骨折切开复位空心钉内固定术
1751	D07儿童骨科、骨盆外科	2020-08-06	2020-08-10	3006550	钱鑫有	男	12Y	取除骨折内固定装置	脊柱侧弯	其他	张敬东	易先宏	毛诚晃	肱骨内固定物取出术
1752	D07儿童骨科、骨盆外科	2020-08-04	2020-08-10	3006554	王子豪	男	1Y	肱骨髁上骨折		治愈	张敬东	易先宏	毛诚晃	肱骨骨折切开复位钢针内固定术
1753	D07儿童骨科、骨盆外科	2020-07-31	2020-08-10	3006560	蒋成框	男	35Y	外踝骨折		治愈	孔建中	孔建中	孔建中	踝关节骨折切开复位钢板内固定术
1754	D07儿童骨科、骨盆外科	2020-07-27	2020-08-11	3006911	倪维俊	男	26Y	开放性髌骨骨折		治愈	孔建中	孔建中	孔建中	皮肤及皮下组织清创术;髌骨骨折切开复位螺钉内固定术
1755	D07儿童骨科、骨盆外科	2020-08-08	2020-08-11	3006915	林方航	男	3Y	肱骨髁上骨折	上臂正中神经损伤;尺骨骨折	治愈	张敬东	易先宏	毛诚晃	肱骨骨折闭合复位钢针内固定术;尺骨骨折闭合复位钢针内固定术
1756	D07儿童骨科、骨盆外科	2020-08-05	2020-08-11	3006920	王子豪	男	7Y	肱骨髁上骨折		治愈	张敬东	易先宏	毛诚晃	肱骨骨折切开复位螺钉内固定术
1757	D07儿童骨科、骨盆外科	2020-08-06	2020-08-11	3006934	洪晓雯	女	11Y	取除骨折内固定装置	股骨头无菌性坏死	其他	张敬东	易先宏	毛诚晃	股骨内固定物取出术
1758	D07儿童骨科、骨盆外科	2020-08-01	2020-08-11	3006943	徐杏花	女	65Y	三踝骨折	高血压病;桡骨下端骨折;脂肪肝;胆囊息肉;2型糖尿病	治愈	翁益民	翁益民	翁益民	踝关节骨折切开复位螺钉内固定术
1759	D07儿童骨科、骨盆外科	2020-08-05	2020-08-11	3006963	魏什么	男	9Y	取除骨折内固定装置		其他	张敬东	易先宏	毛诚晃	胫骨内固定物取出术
1760	D07儿童骨科、骨盆外科	2020-07-31	2020-08-11	3006971	舒信	男	21Y	桡骨下端骨折	尺骨茎突骨折	治愈	翁益民	翁益民	翁益民	桡骨骨折闭合复位螺钉内固定术
1761	D07儿童骨科、骨盆外科	2020-07-25	2020-08-11	3006981	潘菊叶	女	60Y	开放性跖骨骨折	慢性支气管炎;2型糖尿病	治愈	翁益民	翁益民	翁益民	皮肤及皮下组织清创术;跖骨骨折切开复位螺钉内固定术
1762	D07儿童骨科、骨盆外科	2020-08-06	2020-08-11	3006984	廖珠宝	女	5Y	取除骨折内固定装置		其他	张敬东	易先宏	毛诚晃	胫骨内固定物取出术
1763	D07儿童骨科、骨盆外科	2020-08-11	2020-08-12	3007263	阚子豪	男	2Y	鹰嘴骨折	前臂神经损伤	未愈	张敬东	易先宏	毛诚晃
1764	D07儿童骨科、骨盆外科	2020-07-20	2020-08-12	3007341	叶丰平	男	44Y	骨盆骨折	多处浅表损伤;踝和足浅表损伤;髋臼骨折;外踝骨折;耻骨骨折;肋骨骨折	治愈	翁益民	翁益民	翁益民	股骨骨折切开复位螺钉内固定术;中厚皮片移植术
1765	D07儿童骨科、骨盆外科	2020-07-31	2020-08-12	3007354	黄孝必	男	50Y	桡骨下端骨折		治愈	翁益民	翁益民	翁益民	桡骨骨折切开复位螺钉内固定术
1766	D07儿童骨科、骨盆外科	2020-07-21	2020-08-12	3007357	蔡文斌	男	35Y	胫腓骨干骨折	半月板损伤;膝关节副韧带扭伤;膝关节十字韧带扭伤;小腿挫伤;大腿挫伤	治愈	翁益民	翁益民	翁益民	副韧带修补术;腓骨骨折切开复位螺钉内固定术
1767	D07儿童骨科、骨盆外科	2020-08-10	2020-08-12	3007362	潘嘉辉	男	9Y	肱骨髁上骨折	肩和上臂特指血管损伤;上臂神经损伤	治愈	张敬东	易先宏	毛诚晃	肱骨骨折切开复位钢针内固定术
1768	D07儿童骨科、骨盆外科	2020-08-02	2020-08-12	3007366	邵建龙	男	39Y	胫骨骨折	腓骨骨折;膝关节十字韧带扭伤	治愈	翁益民	翁益民	翁益民	胫骨骨折切开复位钢针内固定术
1769	D07儿童骨科、骨盆外科	2020-08-10	2020-08-13	3007887	杨竞	男	12Y	尺骨骨折	桡骨头脱位	治愈	张敬东	易先宏	毛诚晃	尺骨骨折闭合复位术;石膏绷带固定
1770	D07儿童骨科、骨盆外科	2020-08-08	2020-08-15	3008155	徐忠伟	男	13Y	取除骨折内固定装置		其他	张敬东	易先宏	毛诚晃	股骨内固定物取出术
1771	D07儿童骨科、骨盆外科	2020-08-01	2020-08-15	3008162	郑永灿	男	53Y	跟骨骨折		治愈	孔建中	孔建中	项光恒	跟骨骨折切开复位螺钉内固定术
1772	D07儿童骨科、骨盆外科	2020-08-12	2020-08-15	3008164	吴佳敏	女	1Y	肱骨髁上骨折		治愈	张敬东	易先宏	毛诚晃	肱骨骨折闭合复位螺钉内固定术
1773	D07儿童骨科、骨盆外科	2020-08-10	2020-08-15	3008166	吴珮瑜	女	2Y	肱骨外髁骨折		治愈	张敬东	易先宏	毛诚晃	肱骨骨折切开复位钢针内固定术
1774	D07儿童骨科、骨盆外科	2020-08-10	2020-08-15	3008169	厉尚辰	男	12Y	肱骨内髁骨折		治愈	张敬东	易先宏	毛诚晃	肱骨骨折切开复位钢针内固定术
1775	D07儿童骨科、骨盆外科	2020-08-10	2020-08-15	3008173	王芷晨	女	3Y	肱骨外髁骨折		治愈	张敬东	易先宏	毛诚晃	肱骨骨折闭合复位螺钉内固定术
1776	D07儿童骨科、骨盆外科	2020-08-12	2020-08-15	3008176	薛志东	男	10Y	肱骨髁上骨折		治愈	张敬东	易先宏	毛诚晃	肱骨骨折切开复位螺钉内固定术
1777	D07儿童骨科、骨盆外科	2020-08-05	2020-08-15	3008179	吉晓	女	3Y	股骨干骨折	股骨下端骨折;股骨粗隆间骨折;髌骨骨折	治愈	张敬东	易先宏	毛诚晃	股骨骨折切开复位钢针内固定术
1778	D07儿童骨科、骨盆外科	2020-08-10	2020-08-15	3008181	杨明博	男	6Y	胫骨下端骨折		治愈	张敬东	易先宏	毛诚晃	胫骨骨折切开复位钢针内固定术
1779	D07儿童骨科、骨盆外科	2020-08-10	2020-08-15	3008188	赵尉峻	男	11Y	鹰嘴骨折		治愈	张敬东	易先宏	毛诚晃	尺骨骨折切开复位钢针内固定术
1780	D07儿童骨科、骨盆外科	2020-08-03	2020-08-16	3008582	金奶娒	男	93Y	股骨粗隆间骨折	下肢动脉粥样硬化;股骨骨折后遗症;慢性膀胱炎;2型糖尿病;腹股沟肿物	治愈	孔建中	孔建中	项光恒	股骨骨折闭合复位螺钉内固定术
1781	D07儿童骨科、骨盆外科	2020-08-06	2020-08-16	3008584	李雪琴	女	26Y	锁骨骨折	特指手术后状态	好转	潘骏	王鉴顺	王鉴顺	锁骨骨折切开复位螺钉内固定术
1782	D07儿童骨科、骨盆外科	2020-08-05	2020-08-16	3008588	廖国华	男	41Y	锁骨骨折	高血压病;多发性肋骨骨折;肺挫伤;胸腔积液;胸椎骨折;脂肪肝;腰椎骨折	治愈	孔建中	孔建中	项光恒	锁骨骨折切开复位钢针内固定术
1783	D07儿童骨科、骨盆外科	2020-08-13	2020-08-16	3008618	游琰懿	男	4Y	肱骨髁上骨折		治愈	张敬东	易先宏	毛诚晃	肱骨骨折切开复位钢针内固定术
1784	D07儿童骨科、骨盆外科	2020-08-12	2020-08-16	3008882	钱柯仁	男	11Y	肱骨髁上骨折		治愈	张敬东	易先宏	毛诚晃	肱骨骨折闭合复位钢针内固定术
1785	D07儿童骨科、骨盆外科	2020-07-25	2020-08-17	3008961	熊先木	男	43Y	陈旧性股骨骨折	特指手术后状态	治愈	孔建中	孔建中	项光恒	股骨螺钉内固定术;股骨楔形截骨术
1786	D07儿童骨科、骨盆外科	2020-08-04	2020-08-17	3008970	柯漫漫	女	12Y	取除骨折内固定装置		其他	张敬东	易先宏	毛诚晃	尺骨内固定物取出术
1787	D07儿童骨科、骨盆外科	2020-08-10	2020-08-17	3008972	李修彬	男	14Y	肱骨骨折	骨囊肿;病理性骨折	治愈	张敬东	易先宏	毛诚晃	肱骨骨折闭合复位螺钉内固定术
1788	D07儿童骨科、骨盆外科	2020-08-12	2020-08-17	3008990	陈郁	女	6Y	肱骨髁上骨折		治愈	张敬东	易先宏	毛诚晃	肱骨骨折闭合复位钢针内固定术
1789	D07儿童骨科、骨盆外科	2020-08-05	2020-08-17	3008991	张崇清	男	49Y	跖骨骨折	肾结石;头部外伤;单纯性肾囊肿;多处浅表损伤;前列腺结石	治愈	孔建中	孔建中	项光恒	跖骨骨折切开复位钢针内固定术
1790	D07儿童骨科、骨盆外科	2020-07-31	2020-08-17	3009034	郑建清	女	40Y	尺骨桡骨骨干骨折		治愈	翁益民	翁益民	翁益民	尺骨骨折切开复位钢针内固定术
1791	D07儿童骨科、骨盆外科	2020-08-04	2020-08-17	3009037	李健	男	31Y	髋臼骨折	特指手术后状态;小腿浅表损伤;2型糖尿病;肋骨骨折;内踝骨折;股骨骨折;髋关节脱位	治愈	翁益民	翁益民	翁益民	股骨骨折切开复位钢针内固定术
1792	D07儿童骨科、骨盆外科	2020-08-12	2020-08-18	3009335	刁婷婷	女	4Y	桡骨下端骨折		治愈	张敬东	易先宏	毛诚晃	桡骨骨折切开复位钢针内固定术
1793	D07儿童骨科、骨盆外科	2020-08-15	2020-08-19	3009760	王舒雅	女	4Y	桡骨颈骨折		治愈	张敬东	易先宏	毛诚晃	桡骨骨折切开复位钢针内固定术
1794	D07儿童骨科、骨盆外科	2020-08-15	2020-08-19	3009771	洪乐	女	10Y	取除骨折内固定装置		其他	张敬东	易先宏	毛诚晃	锁骨内固定物取出术
1795	D07儿童骨科、骨盆外科	2020-08-13	2020-08-19	3009786	姜诚澈	男	9Y	锁骨骨折	肩锁关节脱位	治愈	孔建中	孔建中	项光恒	锁骨骨折切开复位钢针内固定术
1796	D07儿童骨科、骨盆外科	2020-08-09	2020-08-19	3009796	韩秀锦	女	70Y	跟骨骨折	高血压病;单纯性肾囊肿;2型糖尿病;骨质疏松;肾萎缩	治愈	翁益民	翁益民	翁益民	跟骨骨折切开复位螺钉内固定术
1797	D07儿童骨科、骨盆外科	2020-07-27	2020-08-19	3009848	彭祉郡	女	4Y	肱骨外髁骨折		治愈	张敬东	易先宏	毛诚晃	肱骨骨折切开复位钢针内固定术
1798	D07儿童骨科、骨盆外科	2020-08-07	2020-08-19	3009967	陈国建	男	12Y	股骨干骨折	跖骨骨折;髌骨骨折;锁骨骨折;肋骨骨折;上颌骨骨折;下颌骨骨折;肺大泡;多处浅表损伤;肺挫伤	治愈	张敬东	易先宏	毛诚晃	股骨骨折切开复位钢板内固定术;跖骨外固定术
1799	D07儿童骨科、骨盆外科	2020-08-16	2020-08-20	3010239	郭天佑	男	3Y	尺骨骨折	前臂桡神经损伤;桡骨头脱位	治愈	张敬东	易先宏	毛诚晃	尺骨骨折切开复位钢针内固定术
1800	D07儿童骨科、骨盆外科	2020-08-17	2020-08-22	3010525	阚子豪	男	2Y	鹰嘴骨折		治愈	张敬东	易先宏	毛诚晃	尺骨骨折切开复位钢针内固定术
1801	D07儿童骨科、骨盆外科	2020-08-17	2020-08-22	3010537	郑元欢	男	9Y	取除骨折内固定装置		其他	张敬东	易先宏	毛诚晃	锁骨内固定物取出术
1802	D07儿童骨科、骨盆外科	2020-08-11	2020-08-22	3010544	王百有	男	33Y	跟骨骨折		治愈	孔建中	孔建中	项光恒	跟骨骨折切开复位钢针内固定术
1803	D07儿童骨科、骨盆外科	2020-08-17	2020-08-22	3010555	涂宸赫	男	8Y	肱骨干骨折	骨囊肿	治愈	张敬东	易先宏	毛诚晃	肱骨骨折闭合复位髓内针内固定术
1804	D07儿童骨科、骨盆外科	2020-08-05	2020-08-22	3010560	娄美莲	女	78Y	股骨粗隆间骨折	抑郁症;下肢动脉粥样硬化;脂肪肝;高血压病;骨质疏松;胆囊结石	治愈	翁益民	翁益民	翁益民	股骨骨折闭合复位钢针内固定术
1805	D07儿童骨科、骨盆外科	2020-08-08	2020-08-22	3010566	陈莲子	女	66Y	股骨干骨折	骨质疏松;脑梗死后遗症;高血压病;腋下淋巴结肿大;肺特指疾患	治愈	翁益民	翁益民	翁益民	股骨骨折切开复位钢针内固定术
1806	D07儿童骨科、骨盆外科	2020-08-17	2020-08-22	3010572	李好	女	11Y	取除骨折内固定装置		其他	张敬东	易先宏	毛诚晃	桡骨内固定物取出术
1807	D07儿童骨科、骨盆外科	2020-08-18	2020-08-22	3010580	刘栩博	男	3Y	肱骨外髁骨折		治愈	张敬东	易先宏	毛诚晃	肱骨骨折切开复位钢针内固定术
1808	D07儿童骨科、骨盆外科	2020-08-13	2020-08-22	3010648	刘奕彤	女	3Y	取除骨折内固定装置		其他	张敬东	易先宏	毛诚晃	股骨内固定物取出术
1809	D07儿童骨科、骨盆外科	2020-08-18	2020-08-23	3010967	林诗琪	女	4Y	胫骨骨折	腓骨骨折	治愈	张敬东	易先宏	毛诚晃	胫骨骨折闭合复位术;腓骨骨折闭合复位术;石膏绷带固定
1810	D07儿童骨科、骨盆外科	2020-08-19	2020-08-23	3010969	林晓宣	女	8Y	胫腓骨闭合性骨折		好转	张敬东	易先宏	毛诚晃
1811	D07儿童骨科、骨盆外科	2020-08-19	2020-08-23	3010972	朱琴希	女	9Y	取除骨折内固定装置		其他	张敬东	易先宏	易先宏	桡骨内固定物取出术
1812	D07儿童骨科、骨盆外科	2020-08-17	2020-08-23	3010981	徐兰香	女	52Y	桡骨下端骨折	骨质疏松	好转	孔建中	孔建中	项光恒	桡骨骨折闭合复位螺钉内固定术
1813	D07儿童骨科、骨盆外科	2020-08-11	2020-08-23	3010984	金彦璋	男	9Y	桡骨下端骨折	尺骨下端骨折	治愈	翁益民	翁益民	翁益民	桡骨骨折切开复位钢针内固定术
1814	D07儿童骨科、骨盆外科	2020-08-18	2020-08-23	3010990	张茹泫	男	1Y	尺骨桡骨远端骨折		好转	张敬东	易先宏	毛诚晃
1815	D07儿童骨科、骨盆外科	2020-08-21	2020-08-24	3011318	余可欣	女	3Y	肱骨骨折		治愈	张敬东	易先宏	毛诚晃
1816	D07儿童骨科、骨盆外科	2020-08-19	2020-08-24	3011319	沈艺	男	13Y	取除骨折内固定装置		其他	张敬东	易先宏	毛诚晃	尺骨内固定物取出术
1817	D07儿童骨科、骨盆外科	2020-08-19	2020-08-24	3011377	阮金熙	男	8Y	桡骨下端骨折		治愈	张敬东	易先宏	毛诚晃	桡骨骨折闭合复位钢针内固定术
1818	D07儿童骨科、骨盆外科	2020-08-15	2020-08-25	3011692	高钗妹	女	80Y	肱骨上端骨折	高血压病;陈旧性尺桡骨骨折;骨质疏松;肝囊肿	好转	孔建中	孔建中	项光恒	肱骨骨折切开复位螺钉内固定术
1819	D07儿童骨科、骨盆外科	2020-08-22	2020-08-26	3012004	张桐瑶	女	6Y	胫骨骨折	多处浅表损伤;头皮血肿;肺挫伤;锁骨骨折;急性鼻窦炎	好转	张敬东	易先宏	毛诚晃
1820	D07儿童骨科、骨盆外科	2020-08-02	2020-08-26	3012013	陈文平	男	46Y	胫骨骨折	膝关节副韧带扭伤;膝外侧半月板损伤;膝内侧半月板损伤;脂肪肝;下肢浅表损伤;腓骨骨折;肋骨骨折;膝关节积液	治愈	翁益民	翁益民	翁益民	胫骨骨折切开复位螺钉内固定术
1821	D07儿童骨科、骨盆外科	2020-08-13	2020-08-26	3012336	周声泓	女	5Y	股骨粗隆下骨折	骨质疏松;脑性瘫痪	治愈	张敬东	易先宏	毛诚晃	股骨骨折切开复位钢针内固定术
1822	D07儿童骨科、骨盆外科	2020-08-06	2020-08-27	3012434	何经世	男	53Y	跟骨骨折	脂肪肝	治愈	孔建中	孔建中	项光恒	跟骨骨折切开复位钢针内固定术
1823	D07儿童骨科、骨盆外科	2020-08-23	2020-08-27	3012475	刘怡晨	女	7Y	取除骨折内固定装置		其他	张敬东	易先宏	闫广奎	胫骨内固定物取出术
1824	D07儿童骨科、骨盆外科	2020-08-23	2020-08-29	3012961	金心艺	女	4Y	肱骨外髁骨折		治愈	张敬东	易先宏	闫广奎	肱骨骨折切开复位钢针内固定术
1825	D07儿童骨科、骨盆外科	2020-08-22	2020-08-29	3012968	洪子健	男	6Y	肱骨外髁骨折		治愈	张敬东	易先宏	方明桥	肱骨骨折切开复位钢针内固定术;上肢关节囊缝合术;石膏绷带固定
1826	D07儿童骨科、骨盆外科	2020-08-26	2020-08-29	3012971	陈潇涵	女	5Y	肱骨髁上骨折		治愈	张敬东	易先宏	方明桥	肱骨骨折闭合复位螺钉内固定术
1827	D07儿童骨科、骨盆外科	2020-08-16	2020-08-29	3012978	施洪国	男	58Y	髌骨骨折	髋臼骨折;骨盆骨折;乙型病毒性肝炎	治愈	孔建中	孔建中	孔建中	骨盆骨折切开复位钢针内固定术
1828	D07儿童骨科、骨盆外科	2020-08-13	2020-08-29	3012986	黄忠亮	男	30Y	肩胛骨骨折	开放性多发性损伤;脾损伤;眼睑挫伤;肾挫伤;肺挫伤;脂肪肝;胸腔积液	治愈	翁益民	翁益民	翁益民	肩胛骨骨折切开复位钢针内固定术
1829	D07儿童骨科、骨盆外科	2020-08-22	2020-08-29	3012987	缪可言	女	5Y	取除骨折内固定装置		其他	张敬东	张敬东	李玉安	股骨内固定物取出术
1830	D07儿童骨科、骨盆外科	2020-08-12	2020-08-29	3013008	尤彩梅	女	61Y	胫骨骨折	膝关节病;肾结石;股骨骨折;冠状动脉粥样硬化性心脏病	治愈	翁益民	翁益民	翁益民	胫骨骨折切开复位钢板内固定术
1831	D07儿童骨科、骨盆外科	2020-08-22	2020-08-29	3013022	何阿青	女	63Y	肱骨骨折		治愈	孔建中	孔建中	孔建中	肱骨骨折切开复位钢针内固定术
1832	D07儿童骨科、骨盆外科	2020-08-25	2020-08-30	3013370	方政军	男	7Y	肱骨外髁骨折	上臂桡神经损伤	治愈	张敬东	易先宏	毛诚晃	肱骨骨折闭合复位螺钉内固定术
1833	D07儿童骨科、骨盆外科	2020-08-24	2020-08-30	3013373	王拓贲	男	25Y	外踝骨折	踝和足韧带破裂	治愈	孔建中	孔建中	孔建中	副韧带修补术;踝关节骨折切开复位钢针内固定术
1834	D07儿童骨科、骨盆外科	2020-08-26	2020-08-31	3013665	杨语嫣	女	5Y	取除骨折内固定装置		其他	张敬东	易先宏	闫广奎	胫骨内固定物取出术
1835	D07儿童骨科、骨盆外科	2020-08-24	2020-08-31	3013738	兰欣怡	女	9Y	胫腓骨干骨折		治愈	孔建中	孔建中	孔建中	胫骨骨折切开复位钢针内固定术
1836	D07儿童骨科、骨盆外科	2020-08-18	2020-08-31	3013741	张剑阳	男	4Y	股骨颈骨折	多处浅表损伤;耻骨骨折	治愈	张敬东	易先宏	毛诚晃	股骨骨折切开复位钢针内固定术
1837	D07儿童骨科、骨盆外科	2020-08-29	2020-08-31	3013748	郑钲琪	女	9Y	锁骨骨折		好转	张敬东	毛诚晃	毛诚晃
1838	D07儿童骨科、骨盆外科	2020-08-22	2020-08-31	3013753	周银弟	女	58Y	髌骨骨折		治愈	翁益民	翁益民	翁益民	髌骨骨折切开复位螺钉内固定术
1839	D07儿童骨科、骨盆外科	2020-08-15	2020-08-31	3013765	杨嘉浩	男	8Y	胫骨下端骨折		治愈	张敬东	闫广奎	闫广奎	胫骨骨折切开复位钢针内固定术
1840	D07儿童骨科、骨盆外科	2020-08-18	2020-08-31	3013979	杨美合	女	56Y	股骨颈骨折		治愈	孔建中	孔建中	孔建中	全髋关节置换术
1841	D07儿童骨科、骨盆外科	2020-08-10	2020-09-02	3014375	周伟国	男	46Y	股骨颈骨折	肝囊肿;骨质疏松;鹰嘴骨折;肾结石;乙型肝炎小三阳;多处浅表损伤	治愈	翁益民	翁益民	柯陈荣	股骨骨折闭合复位钢针内固定术;尺骨骨折切开复位钢针内固定术
1842	D07儿童骨科、骨盆外科	2020-08-18	2020-09-02	3014390	邵云兰	女	84Y	股骨粗隆间骨折	心脏病;骨质疏松;肾结石;高血压病	治愈	孔建中	孔建中	陈墨川	股骨骨折闭合复位钢针内固定术
1843	D07儿童骨科、骨盆外科	2020-07-25	2020-09-02	3014392	李平勇	女	49Y	股骨颈骨折	高血压病;脂肪肝;骨质疏松;下肢浅表损伤	治愈	孔建中	孔建中	陈墨川	股骨骨折闭合复位钢针内固定术;中厚皮片移植术;皮肤及皮下组织清创术
1844	D07儿童骨科、骨盆外科	2020-08-17	2020-09-02	3014395	林燕英	女	68Y	股骨骨折	高血压病;2型糖尿病;肾上腺肿瘤;髌骨骨折;脂肪肝;肺部感染;胸腔积液;下肢静脉血栓形成	治愈	孔建中	孔建中	陈墨川	髌骨骨折切开复位螺钉内固定术;下腔静脉滤器置入术;股骨骨折切开复位钢针内固定术
1845	D07儿童骨科、骨盆外科	2020-08-28	2020-09-02	3014398	陈玉梅	女	85Y	肱骨上端骨折	桡骨下端骨折;单纯性肾囊肿;骨质疏松;下肢静脉血栓形成	治愈	孔建中	孔建中	陈墨川	肱骨骨折切开复位钢针内固定术
1846	D07儿童骨科、骨盆外科	2020-08-18	2020-09-02	3014409	邢喜芬	女	96Y	股骨粗隆间骨折	肺部感染;陈旧性肋骨骨折;胆囊结石;单纯性肾囊肿;下肢静脉血栓形成;完全性右束支传导阻滞;房性早搏	治愈	孔建中	孔建中	陈墨川	股骨骨折闭合复位钢针内固定术
1847	D07儿童骨科、骨盆外科	2020-08-17	2020-09-02	3014413	黄小秋	女	57Y	髌骨骨折	桡骨下端骨折;骨质疏松;胆囊息肉	治愈	孔建中	孔建中	陈墨川	股四头肌缝合术;髌骨骨折切开复位螺钉内固定术
1848	D07儿童骨科、骨盆外科	2020-08-28	2020-09-02	3014625	张国	男	41Y	内踝骨折	高血压病;浅表损伤;外踝骨折;脂肪肝;胸膜炎	治愈	孔建中	孔建中	陈墨川	踝关节骨折切开复位钢针内固定术;腓骨骨折闭合复位钢针内固定术
1849	D07儿童骨科、骨盆外科	2020-08-30	2020-09-03	3014880	张一一	女	6Y	肱骨髁上骨折	上臂神经损伤	治愈	张敬东	易先宏	毛诚晃	肱骨骨折闭合复位钢针内固定术
1850	D07儿童骨科、骨盆外科	2020-08-24	2020-09-03	3014997	石开宇	男	41Y	踝骨闭合性骨折	高血压病;后天性肾囊肿;脂肪肝	治愈	孔建中	孔建中	陈墨川	踝关节骨折切开复位钢针内固定术
1851	D07儿童骨科、骨盆外科	2020-08-28	2020-09-03	3015036	刘江浩	男	6Y	肱骨髁上骨折		治愈	孔建中	孔建中	陈墨川	肱骨骨折闭合复位钢针内固定术
1852	D07儿童骨科、骨盆外科	2020-08-28	2020-09-03	3015059	陈娟迪	女	66Y	肱骨上端骨折	骨质疏松;心包积液;单纯性肾囊肿;肾结石	治愈	孔建中	孔建中	陈墨川	肩袖修补术;肱骨骨折切开复位钢针内固定术
1853	D07儿童骨科、骨盆外科	2020-08-25	2020-09-05	3015229	余坤法	男	74Y	股骨粗隆间骨折	前列腺增生;脑损害和功能障碍及躯体疾病引起特指精神障碍;高血压病;老年性脑萎缩;后天性肾囊肿	治愈	孔建中	孔建中	陈墨川	股骨骨折闭合复位钢针内固定术
1854	D07儿童骨科、骨盆外科	2020-08-23	2020-09-05	3015308	许晓俊	男	30Y	跟骨骨折	距骨骨折	治愈	翁益民	翁益民	柯陈荣	跟骨骨折切开复位钢针内固定术
1855	D07儿童骨科、骨盆外科	2020-08-28	2020-09-05	3015317	全心雨	女	6Y	骨盆骨折	腹水;耻骨骨折;髂骨骨折;多发性损伤;创伤性耻骨联合破裂	好转	张敬东	易先宏	毛诚晃
1856	D07儿童骨科、骨盆外科	2020-08-30	2020-09-05	3015322	黄煜博	男	5Y	取除骨折内固定装置		其他	张敬东	张敬东	毛诚晃	胫骨内固定物取出术
1857	D07儿童骨科、骨盆外科	2020-09-01	2020-09-05	3015327	郑文昊	男	7Y	肱骨外髁骨折		治愈	张敬东	闫广奎	闫广奎	肱骨骨折切开复位钢针内固定术
1858	D07儿童骨科、骨盆外科	2020-08-22	2020-09-05	3015333	郭合齐	男	52Y	胫骨骨折	后天性肾囊肿;前列腺钙化灶;肋骨骨折;腓骨骨折;肺大泡	治愈	翁益民	翁益民	柯陈荣	胫骨骨折切开复位钢针内固定术
1859	D07儿童骨科、骨盆外科	2020-09-01	2020-09-05	3015335	黄子邺	男	3Y	肱骨髁上骨折		治愈	张敬东	张敬东	李玉安	肱骨骨折切开复位钢针内固定术
1860	D07儿童骨科、骨盆外科	2020-08-13	2020-09-05	3015379	李博进	男	9Y	肱骨外科颈骨折	肋骨骨折;骨盆骨折;肺挫伤;头皮血肿;多处浅表损伤;腹水	治愈	张敬东	易先宏	李玉安	肱骨骨折闭合复位钢针内固定术
1861	D07儿童骨科、骨盆外科	2020-08-27	2020-09-06	3015677	刘芯怡	女	6Y	桡骨干骨折		治愈	翁益民	翁益民	柯陈荣	桡骨骨折切开复位钢针内固定术
1862	D07儿童骨科、骨盆外科	2020-08-29	2020-09-06	3015709	钱海强	男	9Y	股骨骨折	尺骨桡骨远端骨折	好转	张敬东	易先宏	毛诚晃	股骨骨折闭合复位钢针内固定术
1863	D07儿童骨科、骨盆外科	2020-08-30	2020-09-06	3015714	陈子萱	女	3Y	股骨骨折		好转	张敬东	易先宏	毛诚晃	股骨骨折切开复位钢针内固定术
1864	D07儿童骨科、骨盆外科	2020-09-01	2020-09-06	3015746	朱煊赫	男	40Y	胫骨骨折	脂肪肝	治愈	孔建中	孔建中	陈墨川	胫骨骨折切开复位钢针内固定术
1865	D07儿童骨科、骨盆外科	2020-08-12	2020-09-06	3015753	龚小明	女	43Y	胫腓骨干骨折	下肢浅表损伤	治愈	翁益民	翁益民	柯陈荣	胫骨骨折切开复位钢针内固定术
1866	D07儿童骨科、骨盆外科	2020-08-21	2020-09-06	3015758	戴玉领	女	59Y	胫腓骨干骨折	下肢浅表损伤;肋骨骨折;肺部感染;胸腔积液	治愈	翁益民	翁益民	柯陈荣	胫骨骨折切开复位钢针内固定术
1867	D07儿童骨科、骨盆外科	2020-09-02	2020-09-07	3016038	蒋城枫	男	11Y	桡骨干骨折		治愈	孔建中	孔建中	陈墨川	桡骨骨折闭合复位髓内针内固定术
1868	D07儿童骨科、骨盆外科	2020-09-02	2020-09-07	3016039	李皓臻	男	5Y	肱骨髁上骨折		治愈	孔建中	孔建中	陈墨川	肱骨骨折闭合复位钢针内固定术
1869	D07儿童骨科、骨盆外科	2020-08-28	2020-09-07	3016043	胡影	女	46Y	胫腓骨干骨折		治愈	孔建中	孔建中	陈墨川	胫骨骨折切开复位钢针内固定术
1870	D07儿童骨科、骨盆外科	2020-08-26	2020-09-07	3016050	黄绿萍	女	50Y	胫腓骨干骨折	脂肪肝	治愈	孔建中	孔建中	陈墨川	胫骨骨折切开复位钢针内固定术
1871	D07儿童骨科、骨盆外科	2020-08-28	2020-09-07	3016108	邵东东	女	20Y	开放性掌骨骨折	多发性掌骨骨折	治愈	孔建中	孔建中	陈墨川	掌骨骨折切开复位钢板内固定术;皮肤及皮下组织清创术
1872	D07儿童骨科、骨盆外科	2020-08-26	2020-09-08	3016360	江金凤	女	42Y	股骨干骨折	股骨颈骨折;肾结石;后天性肾囊肿	治愈	孔建中	孔建中	陈墨川	股骨骨折切开复位钢针内固定术
1873	D07儿童骨科、骨盆外科	2020-09-05	2020-09-08	3016366	徐奕帆	男	2Y	胫骨上端骨折	开放性多发性损伤	治愈	张敬东	毛诚晃	毛诚晃
1874	D07儿童骨科、骨盆外科	2020-08-29	2020-09-08	3016373	赵小珍	女	30Y	胫骨骨折	脂肪肝	治愈	孔建中	孔建中	陈墨川	胫骨骨折切开复位钢针内固定术
1875	D07儿童骨科、骨盆外科	2020-09-02	2020-09-08	3016375	叶晓雪	女	2Y	指骨骨折		治愈	张敬东	李玉安	李玉安	指骨骨折闭合复位钢针内固定术
1876	D07儿童骨科、骨盆外科	2020-09-03	2020-09-08	3016436	童诗晨	女	4Y	肱骨外髁骨折		治愈	张敬东	毛诚晃	毛诚晃	肱骨骨折切开复位钢针内固定术
1877	D07儿童骨科、骨盆外科	2020-08-23	2020-09-09	3016712	杨帆	男	6Y	尺骨桡骨闭合性骨折	手术后切口感染	治愈	张敬东	方明桥	李玉安	尺骨骨折切开复位钢针内固定术;皮肤和皮下坏死组织切除清创术
1878	D07儿童骨科、骨盆外科	2020-09-06	2020-09-09	3016714	刘若熙	女	3Y	肱骨髁上骨折	上臂神经损伤	治愈	张敬东	李玉安	李玉安	肱骨骨折切开复位钢针内固定术
1879	D07儿童骨科、骨盆外科	2020-09-01	2020-09-10	3017157	王子涵	男	3Y	股骨干骨折	肺挫伤	治愈	张敬东	张敬东	李玉安	股骨骨折闭合复位髓内针内固定术
1880	D07儿童骨科、骨盆外科	2020-09-01	2020-09-10	3017160	柳筱筱	女	31Y	胸椎骨折	纤维囊性乳腺病;乳房孤立囊肿;室性早搏;椎管狭窄	好转	翁益民	翁益民	柯陈荣
1881	D07儿童骨科、骨盆外科	2020-08-29	2020-09-12	3017488	覃明聪	男	13Y	跟骨骨折	开放性多发性损伤;颅腔积气;脊柱骨折;脑挫伤	治愈	孔建中	孔建中	陈墨川	跟骨骨折切开复位钢针内固定术;跟骨植骨术;皮肤及皮下组织清创术
1882	D07儿童骨科、骨盆外科	2020-09-05	2020-09-12	3017513	欧阳正一	男	12Y	锁骨骨折		治愈	张敬东	张敬东	李玉安	锁骨骨折切开复位钢针内固定术
1883	D07儿童骨科、骨盆外科	2020-09-05	2020-09-12	3017516	金青锋	男	56Y	闭合性胫骨平台骨折	前列腺结石;脂肪肝	好转	孔建中	孔建中	陈墨川	胫骨骨折切开复位钢针内固定术
1884	D07儿童骨科、骨盆外科	2020-09-08	2020-09-12	3017522	郑瑾熙	男	8Y	尺骨桡骨闭合性骨折		治愈	张敬东	李玉安	李玉安	尺骨骨折闭合复位髓内针内固定术
1885	D07儿童骨科、骨盆外科	2020-09-07	2020-09-12	3017526	高洋博	男	10Y	肱骨髁上骨折		治愈	张敬东	毛诚晃	李玉安	肱骨骨折切开复位钢针内固定术
1886	D07儿童骨科、骨盆外科	2020-09-08	2020-09-12	3017538	金依善	女	9Y	取除骨折内固定装置		其他	张敬东	李玉安	李玉安	肱骨内固定物取出术
1887	D07儿童骨科、骨盆外科	2020-09-05	2020-09-12	3017541	胡海盈	女	10Y	肱骨髁上骨折	上臂神经损伤	治愈	张敬东	张敬东	李玉安	肱骨骨折切开复位钢板内固定术
1888	D07儿童骨科、骨盆外科	2020-08-31	2020-09-12	3017547	刘润秋	男	6Y	股骨粗隆间骨折	躯干骨囊肿	好转	张敬东	李玉安	李玉安	股骨骨折闭合复位髓内针内固定术
1889	D07儿童骨科、骨盆外科	2020-09-01	2020-09-12	3017565	李胜权	男	62Y	肩胛骨骨折	脂肪肝	治愈	孔建中	孔建中	陈墨川	肩胛骨骨折切开复位钢针内固定术
1890	D07儿童骨科、骨盆外科	2020-09-08	2020-09-12	3017572	陈家琦	女	3Y	指骨骨折	开放性手部损伤	治愈	张敬东	李玉安	李玉安	指骨钢针内固定术;甲成形术
1891	D07儿童骨科、骨盆外科	2020-07-25	2020-09-13	3017888	唐维芳	女	50Y	开放性胫腓骨干骨折	多发性损伤;股骨颈骨折	治愈	孔建中	孔建中	陈墨川	胫骨骨折闭合复位钢板内固定术;腓骨骨折闭合复位钢板内固定术;股骨骨折闭合复位钢针内固定术
1892	D07儿童骨科、骨盆外科	2020-09-05	2020-09-13	3017890	李春兰	女	68Y	肱骨外科颈骨折	高血压病;2型糖尿病;胆囊结石	好转	孔建中	孔建中	陈墨川	肱骨内固定物取出术;肱骨骨折切开复位钢板内固定术
1893	D07儿童骨科、骨盆外科	2020-08-26	2020-09-13	3017938	徐益隆	男	58Y	肩锁关节脱位	头部外伤;肩胛骨骨折;前列腺结石;胆囊结石;闭合性胫骨平台骨折;骨和关节软骨良性肿瘤	好转	孔建中	孔建中	陈墨川	肩锁关节脱位切开复位内固定术;肩关节修补术
1894	D07儿童骨科、骨盆外科	2020-09-10	2020-09-14	3018379	胡益高	男	6Y	肱骨外髁骨折		治愈	张敬东	易先宏	毛诚晃	肱骨骨折切开复位钢针内固定术
1895	D07儿童骨科、骨盆外科	2020-09-09	2020-09-14	3018394	相子涵	男	3Y	肱骨骨折		治愈	张敬东	易先宏	毛诚晃	肱骨骨折切开复位钢针内固定术
1896	D07儿童骨科、骨盆外科	2020-08-24	2020-09-14	3018405	郭红敏	女	30Y	股骨特指部位骨折	鼻和鼻窦特指疾病;肺挫伤;鼻骨骨折;特指手术后状态;多处浅表损伤	好转	翁益民	翁益民	柯陈荣	股骨骨折切开复位钢针内固定术
1897	D07儿童骨科、骨盆外科	2020-09-07	2020-09-14	3018420	潘豪翔	男	6Y	尺骨桡骨闭合性骨折		治愈	张敬东	易先宏	毛诚晃	尺骨骨折切开复位钢针内固定术
1898	D07儿童骨科、骨盆外科	2020-09-03	2020-09-14	3018667	刘锦鸿	男	6Y	股骨骨折	多处浅表损伤;贫血	治愈	张敬东	易先宏	毛诚晃	股骨骨折切开复位钢针内固定术
1899	D07儿童骨科、骨盆外科	2020-08-31	2020-09-15	3018773	陈松廷	男	71Y	跟骨骨折	髋臼骨折;肺挫伤;髌骨骨折;指骨骨折;耻骨骨折;肋骨骨折;胸腔积液;肺大泡;陈旧性肺结核;下肢动脉粥样硬化;老年性脑萎缩;肾结石;肺空洞	好转	翁益民	翁益民	柯陈荣	盆骨外固定术;跟骨骨折切开复位钢板内固定术
1900	D07儿童骨科、骨盆外科	2020-09-09	2020-09-15	3018776	任博洋	男	7Y	尺骨桡骨远端骨折		治愈	张敬东	易先宏	毛诚晃	尺骨骨折闭合复位钢针内固定术
1901	D07儿童骨科、骨盆外科	2020-09-03	2020-09-17	3019238	蔡雷生	男	53Y	胫腓骨干骨折	多发性损伤	治愈	孔建中	孔建中	陈墨川	胫骨骨折切开复位钢板内固定术;腓骨骨折闭合复位髓内针内固定术
1902	D07儿童骨科、骨盆外科	2020-09-02	2020-09-18	3019314	向宇	男	4Y	股骨粗隆间骨折	消化道穿孔;开放性多发性损伤;多处浅表损伤;肝损伤;液气胸;肺挫伤;腹水;胃穿孔	治愈	张敬东	易先宏	毛诚晃	股骨骨折闭合复位钢针内固定术
1903	D07儿童骨科、骨盆外科	2020-09-09	2020-09-18	3019317	叶王越	女	1Y	股骨干骨折	开放性唇部损伤;肺挫伤	治愈	张敬东	易先宏	毛诚晃	股骨骨折闭合复位术;石膏绷带固定
1904	D07儿童骨科、骨盆外科	2020-09-05	2020-09-18	3019350	潘正	男	29Y	髂骨骨折	多处浅表损伤;特指手术后状态	好转	翁益民	翁益民	柯陈荣	骨盆骨折切开复位钢针内固定术
1905	D07儿童骨科、骨盆外科	2020-09-09	2020-09-19	3019674	方学雷	男	15Y	尺骨桡骨骨干骨折		好转	张敬东	闫广奎	毛诚晃	尺骨骨折切开复位钢针内固定术
1906	D07儿童骨科、骨盆外科	2020-09-15	2020-09-19	3019677	郭明辉	男	2Y	肱骨髁上骨折		治愈	张敬东	毛诚晃	毛诚晃	肱骨骨折闭合复位钢针内固定术
1907	D07儿童骨科、骨盆外科	2020-09-10	2020-09-19	3019738	娄美平	女	59Y	髌骨骨折		治愈	孔建中	孔建中	陈墨川	髌骨骨折切开复位螺钉内固定术
1908	D07儿童骨科、骨盆外科	2020-09-08	2020-09-19	3019827	金学爱	女	64Y	股骨粗隆间骨折		好转	孔建中	孔建中	陈墨川	股骨骨折切开复位钢针内固定术
1909	D07儿童骨科、骨盆外科	2020-09-10	2020-09-19	3019835	杨金娥	女	58Y	股骨颈骨折	骨质疏松	好转	孔建中	孔建中	陈墨川	股骨骨折闭合复位钢针内固定术
1910	D07儿童骨科、骨盆外科	2020-09-06	2020-09-19	3019873	金汶波	男	71Y	股骨粗隆间骨折	髋关节半脱位;肩胛骨骨折;椎管狭窄;脂肪肝;蛛网膜下腔出血;胆囊结石;多发性腰椎骨折;老年性脑萎缩;单纯性肾囊肿;多发性肋骨骨折;2型糖尿病;髋臼骨折	好转	孔建中	孔建中	陈墨川	髋骨骨折切开复位钢板内固定术;股骨骨折闭合复位螺钉内固定术
1911	D07儿童骨科、骨盆外科	2020-09-09	2020-09-20	3018458	卓步焌	男	9Y	胫骨骨折	肘浅表损伤	治愈	张敬东	张敬东	李玉安	胫骨骨折闭合复位螺钉内固定术
1912	D07儿童骨科、骨盆外科	2020-09-07	2020-09-20	3019830	李凤侠	女	27Y	股骨粗隆间骨折	面部软组织挫伤	治愈	孔建中	孔建中	陈墨川	股骨骨折闭合复位钢针内固定术
1913	D07儿童骨科、骨盆外科	2020-09-14	2020-09-20	3019981	池奕成	男	6Y	尺骨桡骨远端骨折		治愈	张敬东	李玉安	毛诚晃	尺骨骨折切开复位钢针内固定术
1914	D07儿童骨科、骨盆外科	2020-09-06	2020-09-20	3020014	董宏坚	男	57Y	胫骨骨折	特指含硅[矽]粉尘肺尘埃沉着病;后天性肾囊肿;肾结石;外踝骨折	好转	翁益民	翁益民	柯陈荣	胫骨骨折切开复位钢针内固定术
1915	D07儿童骨科、骨盆外科	2020-09-18	2020-09-21	3020302	余希佳	男	2Y	肱骨髁上骨折		治愈	张敬东	闫广奎	毛诚晃	肱骨骨折闭合复位钢针内固定术
1916	D07儿童骨科、骨盆外科	2020-09-16	2020-09-21	3020304	谢心怡	女	7Y	肱骨骨折		治愈	张敬东	易先宏	闫广奎	肱骨骨折闭合复位钢针内固定术
1917	D07儿童骨科、骨盆外科	2020-09-18	2020-09-21	3020307	刘羽凡	女	2Y	取除骨折内固定装置		其他	张敬东	易先宏	毛诚晃	股骨内固定物取出术
1918	D07儿童骨科、骨盆外科	2020-09-09	2020-09-21	3020315	马鑫荣	男	13Y	髌骨骨折	髌骨脱位;后天性膝外翻	治愈	张敬东	易先宏	毛诚晃	髌骨重建术;膝关节修正术;髌骨骨折切开复位螺钉内固定术
1919	D07儿童骨科、骨盆外科	2020-09-17	2020-09-21	3020329	高渝涵	女	5Y	肱骨髁上骨折	上臂神经损伤;上肢血管损伤	治愈	张敬东	易先宏	毛诚晃	肱骨骨折切开复位钢针内固定术
1920	D07儿童骨科、骨盆外科	2020-09-09	2020-09-21	3020372	陈玉梅	女	85Y	股骨颈骨折	特指手术后状态;骨质疏松	治愈	孔建中	孔建中	陈墨川	全髋关节置换术
1921	D07儿童骨科、骨盆外科	2020-09-16	2020-09-21	3020393	南松清	男	39Y	尺骨骨折		好转	孔建中	孔建中	陈墨川	尺骨骨折闭合复位螺钉内固定术
1922	D07儿童骨科、骨盆外科	2020-09-07	2020-09-21	3020565	吴媚菊	女	82Y	股骨粗隆间骨折	下肢动脉粥样硬化;高血压病;骨质疏松伴病理性骨折;2型糖尿病	好转	孔建中	孔建中	陈墨川	股骨骨折闭合复位钢针内固定术
1923	D07儿童骨科、骨盆外科	2020-09-19	2020-09-22	3020685	屠文昊	男	7Y	肱骨髁上骨折		好转	张敬东	张敬东	毛诚晃	肱骨骨折闭合复位钢针内固定术
1924	D07儿童骨科、骨盆外科	2020-09-20	2020-09-22	3020687	杨爱雪	女	54Y	肱骨骨折	甲状腺肿;肺大泡	好转	翁益民	翁益民	柯陈荣
1925	D07儿童骨科、骨盆外科	2020-09-18	2020-09-22	3020694	陈文馨	女	3Y	胫腓骨下端骨折		好转	张敬东	毛诚晃	毛诚晃
1926	D07儿童骨科、骨盆外科	2020-09-14	2020-09-22	3020696	彭望兰	女	31Y	肱骨髁间骨折	前臂尺神经损伤	好转	孔建中	孔建中	陈墨川	肱骨骨折切开复位钢针内固定术
1927	D07儿童骨科、骨盆外科	2020-09-07	2020-09-22	3020699	卢燕	女	30Y	楔状骨骨折(足)	开放性足损伤;开放性趾损伤;小腿水平大隐静脉损伤;下肢肌腱损伤;脂肪肝;足特指部位脱位;足部皮肤撕裂伤	治愈	孔建中	孔建中	陈墨川	楔骨骨折切开复位螺钉内固定术;跗跖关节脱位切开复位术;肌腱成形术;皮肤及皮下组织清创术
1928	D07儿童骨科、骨盆外科	2020-09-18	2020-09-22	3020703	林月磊	男	11Y	肱骨外科颈骨折		好转	张敬东	毛诚晃	毛诚晃	肱骨骨折切开复位钢针内固定术
1929	D07儿童骨科、骨盆外科	2020-08-31	2020-09-23	3021042	张丙玉	男	35Y	踝骨闭合性骨折	特指手术后状态;脂肪肝	好转	孔建中	孔建中	陈墨川	踝关节骨折切开复位钢针内固定术
1930	D07儿童骨科、骨盆外科	2020-09-06	2020-09-23	3021044	胡万香	女	76Y	肱骨骨折	后天性肾囊肿;脂肪肝	好转	孔建中	孔建中	陈墨川	肱骨人工骨植骨术;肩袖修补术
1931	D07儿童骨科、骨盆外科	2020-09-19	2020-09-23	3021050	夏远涵	男	9Y	取除骨折内固定装置		其他	张敬东	张敬东	毛诚晃	胫骨内固定物取出术
1932	D07儿童骨科、骨盆外科	2020-09-19	2020-09-23	3021053	徐文航	男	6Y	肱骨髁上骨折		好转	张敬东	李玉安	毛诚晃	肱骨骨折切开复位钢针内固定术
1933	D07儿童骨科、骨盆外科	2020-09-19	2020-09-23	3021057	张邵博	男	6Y	肱骨髁上骨折		好转	张敬东	张敬东	毛诚晃	肱骨骨折切开复位钢针内固定术
1934	D07儿童骨科、骨盆外科	2020-09-20	2020-09-24	3021546	尹宇杰	男	11Y	胫腓骨干骨折		好转	张敬东	张敬东	毛诚晃
1935	D07儿童骨科、骨盆外科	2020-09-14	2020-09-24	3021589	池孔铭	男	8Y	股骨干骨折		治愈	孔建中	孔建中	陈墨川	股骨骨折切开复位钢针内固定术
1936	D07儿童骨科、骨盆外科	2020-09-23	2020-09-24	3021594	陈俊	男	43Y	指骨骨折	脾大;特指手术后状态	好转	翁益民	翁益民	柯陈荣
1937	D07儿童骨科、骨盆外科	2020-09-20	2020-09-26	3021849	黄雨泽	男	7Y	取除骨折内固定装置		其他	张敬东	毛诚晃	毛诚晃	股骨内固定物取出术
1938	D07儿童骨科、骨盆外科	2020-09-20	2020-09-26	3021852	吕文威	男	8Y	取除骨折内固定装置		其他	张敬东	李玉安	毛诚晃	肱骨内固定物取出术
1939	D07儿童骨科、骨盆外科	2020-09-20	2020-09-26	3021859	马小秋	女	51Y	股骨颈骨折		治愈	孔建中	孔建中	陈墨川	股骨骨折闭合复位钢针内固定术
1940	D07儿童骨科、骨盆外科	2020-09-21	2020-09-26	3021866	林梦霓	女	5Y	肱骨外髁骨折		好转	张敬东	李玉安	毛诚晃	肱骨骨折闭合复位钢针内固定术
1941	D07儿童骨科、骨盆外科	2020-09-09	2020-09-26	3021867	王硕硕	男	4Y	骨盆骨折	肝损伤;多发性损伤;肺特指损伤;皮肤挫伤;肺挫伤	好转	张敬东	张敬东	毛诚晃
1942	D07儿童骨科、骨盆外科	2020-09-22	2020-09-26	3021897	杨诗悦	女	5Y	肱骨外髁骨折		好转	张敬东	李玉安	毛诚晃	肱骨骨折切开复位钢针内固定术
1943	D07儿童骨科、骨盆外科	2020-09-17	2020-09-26	3021902	曾明曦	男	6Y	胫腓骨闭合性骨折	创伤性牙齿脱落	治愈	张敬东	张敬东	毛诚晃	胫骨骨折切开复位钢针内固定术
1944	D07儿童骨科、骨盆外科	2020-09-19	2020-09-26	3021915	陈城	男	2Y	尺骨桡骨闭合性骨折	头皮血肿	治愈	孔建中	孔建中	陈墨川	桡骨骨折切开复位髓内针内固定术;尺骨骨折闭合复位钢针内固定术
1945	D07儿童骨科、骨盆外科	2020-09-21	2020-09-26	3021921	盛文泽	男	9Y	肱骨髁上骨折		好转	张敬东	易先宏	闫广奎	肱骨骨折闭合复位钢针内固定术
1946	D07儿童骨科、骨盆外科	2020-09-04	2020-09-26	3021925	钱素菊	女	60Y	开放性外踝骨折	踝和足韧带破裂;开放性距骨骨折;开放性足损伤;小腿水平腓神经损伤;高血压病;肝回声不均;肝血管瘤	治愈	翁益民	翁益民	柯陈荣	距骨骨折切开复位钢针内固定术;踝关节修补术;皮肤及皮下组织清创术
1947	D07儿童骨科、骨盆外科	2020-09-13	2020-09-26	3021969	蔡苏凤	女	39Y	开放性胫骨骨干骨折	小腿特指损伤;膝关节副韧带扭伤;内侧半月板损伤;膝关节积液;下肢浅表损伤;面部软组织挫伤;腓骨骨折	治愈	翁益民	翁益民	柯陈荣	胫骨骨折切开复位钢板内固定术
1948	D07儿童骨科、骨盆外科	2020-09-22	2020-09-26	3021988	彭千漩	女	1Y	肱骨髁上骨折		好转	张敬东	毛诚晃	毛诚晃	肱骨骨折闭合复位钢针内固定术
1949	D07儿童骨科、骨盆外科	2020-09-19	2020-09-27	3022251	谷奶牛	男	82Y	肱骨干骨折	头皮擦伤;老年性脑萎缩;后天性肾囊肿;腔隙性脑梗死;髋臼骨折;耻骨骨折;脂肪肝	治愈	孔建中	孔建中	陈墨川	肱骨骨折切开复位钢针内固定术
1950	D07儿童骨科、骨盆外科	2020-09-17	2020-09-27	3022270	郑祥发	男	67Y	股骨粗隆间骨折	高血压病;肾结石;前列腺结石;胆囊息肉	好转	翁益民	翁益民	柯陈荣	股骨骨折闭合复位钢针内固定术
1951	D07儿童骨科、骨盆外科	2020-09-09	2020-09-27	3022273	杨睿怡	女	9Y	股骨干骨折	肌腱和肌肉损伤	治愈	张敬东	易先宏	闫广奎	肱骨骨折切开复位钢针内固定术
1952	D07儿童骨科、骨盆外科	2020-09-21	2020-09-27	3022302	杨慧怡	女	6Y	尺骨桡骨闭合性骨折		治愈	张敬东	易先宏	方明桥	尺骨骨折闭合复位髓内针内固定术;桡骨骨折闭合复位髓内针内固定术
1953	D07儿童骨科、骨盆外科	2020-09-18	2020-09-28	3022588	林蔷薇	女	70Y	开放性股骨干骨折	骨质疏松	治愈	孔建中	孔建中	陈墨川	股骨骨折切开复位钢针内固定术
1954	D07儿童骨科、骨盆外科	2020-09-24	2020-09-28	3022592	郑如婷	女	11Y	桡骨颈骨折	鹰嘴骨折	好转	张敬东	毛诚晃	毛诚晃
1955	D07儿童骨科、骨盆外科	2020-09-19	2020-09-28	3022595	潘玉莲	女	83Y	桡骨下端骨折	特指手术后状态;高血压病;肺占位性病变;老年性脑萎缩;肺纤维化;硬脑膜下积液	治愈	孔建中	孔建中	陈墨川	桡骨骨折闭合复位螺钉内固定术;桡骨外固定术
1956	D07儿童骨科、骨盆外科	2020-09-24	2020-09-28	3022750	程金香	女	24Y	跖骨骨折	骰骨骨折;楔状骨骨折(足)	好转	翁益民	翁益民	柯陈荣
1957	D07儿童骨科、骨盆外科	2020-09-19	2020-09-29	3022911	林志强	男	12Y	股骨颈骨折	骶骨骨折;特指手术后状态	治愈	孔建中	孔建中	陈墨川	股骨骨折闭合复位螺钉内固定术
1958	D07儿童骨科、骨盆外科	2020-09-14	2020-09-29	3022913	陈明容	女	43Y	跟骨骨折	脂肪肝	治愈	孔建中	孔建中	陈墨川	跟骨骨折切开复位钢针内固定术
1959	D07儿童骨科、骨盆外科	2020-09-19	2020-09-29	3022915	徐春媚	女	67Y	桡骨下端骨折	脂肪肝;后天性肾囊肿	治愈	孔建中	孔建中	陈墨川	全髋关节置换术
1960	D07儿童骨科、骨盆外科	2020-09-26	2020-09-29	3022919	潘雨晴	女	4Y	肱骨髁上骨折	上肢神经损伤	好转	张敬东	易先宏	闫广奎	肱骨骨折闭合复位钢针内固定术
1961	D07儿童骨科、骨盆外科	2020-09-25	2020-09-29	3022923	王骏腾	男	3Y	肱骨髁上骨折	上肢神经损伤	治愈	张敬东	张敬东	毛诚晃	肱骨骨折闭合复位螺钉内固定术
1962	D07儿童骨科、骨盆外科	2020-09-22	2020-09-29	3022925	吴俊良	男	10Y	尺骨桡骨闭合性骨折		治愈	张敬东	李玉安	毛诚晃	桡骨骨折闭合复位髓内针内固定术;尺骨骨折闭合复位髓内针内固定术
1963	D07儿童骨科、骨盆外科	2020-09-19	2020-09-29	3022933	王春莲	女	76Y	股骨颈骨折	肾结石;脂肪肝;下肢动脉粥样硬化;后天性肾囊肿	治愈	孔建中	孔建中	陈墨川	人工股骨头置换术
1964	D07儿童骨科、骨盆外科	2020-09-21	2020-09-29	3022939	叶玉茹	女	43Y	胫骨骨折	脂肪肝	治愈	孔建中	孔建中	陈墨川	胫骨骨折切开复位钢针内固定术
1965	D07儿童骨科、骨盆外科	2020-09-06	2020-09-29	3022940	叶庆武	男	45Y	跟骨骨折	开放性多发性损伤;电流效应;胆囊息肉	治愈	翁益民	翁益民	柯陈荣	跟骨骨折切开复位钢板内固定术
1966	D07儿童骨科、骨盆外科	2020-09-13	2020-09-29	3022942	朱千方	男	20Y	尺骨骨折	肌腱和肌肉损伤	好转	翁益民	翁益民	柯陈荣	尺骨骨折切开复位钢针内固定术
1967	D07儿童骨科、骨盆外科	2020-09-28	2020-09-29	3022952	徐兴云	男	11Y	锁骨骨折		好转	张敬东	毛诚晃	毛诚晃
1968	D07儿童骨科、骨盆外科	2020-09-22	2020-09-30	3023442	郑寒	男	15Y	髂骨骨折		治愈	陈龙	陈龙	应晓洲	髂骨骨折切开复位钢针内固定术
1969	D07儿童骨科、骨盆外科	2020-09-25	2020-09-30	3023444	朱鑫宇	男	7Y	肱骨外髁骨折		好转	张敬东	易先宏	方明桥	肱骨骨折切开复位钢针内固定术
1970	D07儿童骨科、骨盆外科	2020-09-25	2020-09-30	3023445	王浩泽	男	12Y	尺骨桡骨闭合性骨折		好转	张敬东	毛诚晃	毛诚晃	桡骨骨折闭合复位钢针内固定术
1971	D07儿童骨科、骨盆外科	2020-09-26	2020-09-30	3023447	周盛哲	男	6Y	取除骨折内固定装置		其他	张敬东	张敬东	毛诚晃	股骨内固定物取出术
1972	D07儿童骨科、骨盆外科	2020-09-27	2020-09-30	3023482	潘熠帆	男	7Y	取除骨折内固定装置		其他	张敬东	李玉安	毛诚晃	胫骨内固定物取出术
1973	D07儿童骨科、骨盆外科	2020-09-09	2020-09-30	3023783	王晓克	男	40Y	胫腓骨干骨折	多囊肾;多囊肝;肝钙化灶	治愈	孔建中	孔建中	陈墨川	胫骨骨折切开复位钢针内固定术;腓骨骨折闭合复位髓内针内固定术
1974	D07儿童骨科、骨盆外科	2020-08-05	2020-09-30	3023786	孔繁友	男	53Y	骰骨骨折	脂肪肝;跖骨骨折;足部脱位;特指趾骨骨折;趾伸肌腱断裂	治愈	孔建中	孔建中	陈墨川	趾肌腱缝合术;跗跖关节脱位切开复位术;皮肤和皮下坏死组织切除清创术;皮肤和皮下组织血肿抽吸术;趾骨骨折切开复位钢针内固定术;跗骨骨折切开复位钢针内固定术;跖骨骨折切开复位螺钉内固定术
1975	D07儿童骨科、骨盆外科	2020-09-29	2020-10-02	3024212	余行	男	13Y	取除骨折内固定装置		其他	张敬东	李玉安	毛诚晃	肱骨内固定物取出术
1976	D07儿童骨科、骨盆外科	2020-09-29	2020-10-02	3024218	潘昱名	男	6Y	取除骨折内固定装置		其他	张敬东	易先宏	毛诚晃	股骨内固定物取出术
1977	D07儿童骨科、骨盆外科	2020-09-28	2020-10-02	3024221	陈渔樾	男	5Y	肱骨髁上骨折	上臂神经损伤	治愈	张敬东	毛诚晃	毛诚晃	肱骨骨折闭合复位钢针内固定术
1978	D07儿童骨科、骨盆外科	2020-09-21	2020-10-03	3024538	邹梓翰	男	3Y	股骨干骨折		好转	张敬东	闫广奎	毛诚晃	股骨骨折闭合复位钢针内固定术
1979	D07儿童骨科、骨盆外科	2020-09-29	2020-10-03	3024540	吴贝贝	女	3Y	取除骨折内固定装置		其他	张敬东	张敬东	毛诚晃	股骨内固定物取出术
1980	D07儿童骨科、骨盆外科	2020-09-28	2020-10-03	3024541	王羽彤	女	7Y	取除骨折内固定装置		其他	张敬东	易先宏	毛诚晃	踝关节内固定物取出术
1981	D07儿童骨科、骨盆外科	2020-09-25	2020-10-03	3024578	尹利沐	男	3Y	胫腓骨干骨折		治愈	张敬东	易先宏	毛诚晃	胫骨骨折闭合复位髓内针内固定术
1982	D07儿童骨科、骨盆外科	2020-09-28	2020-10-03	3024604	陈潜	男	34Y	陈旧性掌骨骨折	陈旧性腕骨骨折	好转	翁益民	翁益民	柯陈荣	腕骨骨折切开复位钢针内固定术
1983	D07儿童骨科、骨盆外科	2020-09-25	2020-10-04	3024749	陈爱媚	女	59Y	股骨骨折	脂肪肝;病理性骨折	治愈	孔建中	孔建中	陈墨川	股骨骨折闭合复位钢针内固定术
1984	D07儿童骨科、骨盆外科	2020-09-26	2020-10-04	3024769	李儒昊	男	13Y	锁骨骨折		治愈	孔建中	孔建中	陈墨川	锁骨骨折切开复位钢针内固定术
1985	D07儿童骨科、骨盆外科	2020-09-24	2020-10-05	3024950	张安生	男	77Y	鹰嘴骨折	高脂血症;高血压病;后天性肾囊肿;前列腺增生;具有心脏起搏器;下肢动脉粥样硬化;前列腺结石;肝囊肿;腰椎间盘突出	好转	翁益民	翁益民	柯陈荣	尺骨骨折切开复位钢针内固定术
1986	D07儿童骨科、骨盆外科	2020-10-02	2020-10-06	3025195	黄子靖	男	3Y	肱骨髁上骨折		治愈	张敬东	易先宏	方明桥	肱骨骨折闭合复位钢针内固定术
1987	D07儿童骨科、骨盆外科	2020-09-28	2020-10-06	3025216	马海涛	男	8Y	鹰嘴骨折		治愈	张敬东	毛诚晃	毛诚晃	尺骨骨折切开复位钢针内固定术
1988	D07儿童骨科、骨盆外科	2020-09-26	2020-10-06	3025229	张小薇	女	72Y	锁骨骨折	骨质疏松;脂肪肝;肝囊肿;后天性肾囊肿;下肢动脉粥样硬化;肺不典型增生	治愈	孔建中	孔建中	陈墨川	锁骨植骨术;锁骨骨折切开复位钢针内固定术
1989	D07儿童骨科、骨盆外科	2020-09-18	2020-10-06	3025282	蔡娇迪	女	53Y	胫腓骨下端骨折	高血压病;脂肪肝;肝囊肿;单纯性肾囊肿;胆囊结石;胸骨骨折;特指椎间盘变性	治愈	孔建中	孔建中	陈墨川	胫骨骨折切开复位钢针内固定术;踝关节骨折闭合复位钢针内固定术;腓骨骨折切开复位钢针内固定术
1990	D07儿童骨科、骨盆外科	2020-09-13	2020-10-08	3025495	周新元	男	79Y	股骨粗隆间骨折	高血压病;前列腺结石;冠状动脉支架植入后状态;特指手术后状态;低氯血症;下肢动脉粥样硬化;单纯性肾囊肿;低钠血症;胆囊结石;肾结石;前列腺增生	好转	翁益民	翁益民	柯陈荣	股骨骨折闭合复位钢针内固定术
1991	D07儿童骨科、骨盆外科	2020-09-25	2020-10-08	3025524	杜若茜	女	31Y	三踝骨折	乙型病毒性肝炎	好转	翁益民	翁益民	柯陈荣	踝关节骨折切开复位钢针内固定术
1992	D07儿童骨科、骨盆外科	2020-10-05	2020-10-08	3025535	蔡智鑫	男	7Y	骨折		好转	张敬东	毛诚晃	毛诚晃
1993	D07儿童骨科、骨盆外科	2020-09-30	2020-10-08	3025542	邵子迈	男	11Y	肱骨内髁骨折		治愈	张敬东	王伟	毛诚晃	肱骨骨折切开复位钢针内固定术
1994	D07儿童骨科、骨盆外科	2020-09-27	2020-10-08	3025547	黄鹂	女	29Y	髌骨骨折		治愈	孔建中	孔建中	陈墨川	股四头肌缝合术;髌骨骨折切开复位张力带钢丝内固定术
1995	D07儿童骨科、骨盆外科	2020-08-08	2020-10-08	3025551	林博	男	5Y	胫腓骨干骨折	骨髓炎	治愈	张敬东	李玉安	毛诚晃	皮肤和皮下坏死组织切除清创术;皮肤和皮下组织切开引流术;胫骨骨折闭合复位髓内针内固定术
1996	D07儿童骨科、骨盆外科	2020-10-02	2020-10-08	3025556	王武涵	男	7Y	肱骨内髁骨折		好转	张敬东	方明桥	方明桥	副韧带修补术;肱骨骨折切开复位钢针内固定术
1997	D07儿童骨科、骨盆外科	2020-09-29	2020-10-08	3025558	陈蕾蕾	女	7Y	胫骨骨折		治愈	张敬东	闫广奎	毛诚晃	胫骨骨折切开复位钢针内固定术
1998	D07儿童骨科、骨盆外科	2020-09-14	2020-10-08	3025574	黄锦恬	女	1Y	肱骨髁上骨折		好转	张敬东	易先宏	毛诚晃	肱骨骨折闭合复位钢针内固定术
[truncated: 10,259 more rows]
