# Supplementary material for: Variable Rate of D-dimer Predicts Venous Thromboembolism in Postoperative Fracture Patients: A Single-Center Retrospective Cohort Study
Source: Research Square preprint supplement (doi:10.21203/rs.3.rs-7878480/v1), 2025-12-09
Supplement: Supplementary file 4 [file 7ae13f91e19ff69a303494cd.xlsx]

## Sheet: Sheet1
骨折+血栓
序号	出院科室	入院日期	出院日期	病案号	病人	性别	年龄	主诊断	非主诊断	转归	主任	主治	住院	手术
					姓名					情况	医师	医师	医师	名称
1	C03眼科口腔	2024-03-31	2024-04-02	3488775	许爱梅	女	75Y	视网膜脱离	白内障;下肢静脉血栓形成;骨折治疗后恢复期;脑挫伤;创伤性蛛网膜下腔出血;脑室出血	治愈	蔡剑秋	夏哲人	张煜	后入路玻璃体切割术;白内障超声乳化抽吸术;视网膜脱离激光治疗术
2	C03眼科口腔	2024-04-16	2024-04-25	3496237	高美柳	女	59Y	胫骨平台伴腓骨骨折	膝关节积液;慢性乙型病毒性肝炎;肝囊肿;下肢静脉血栓形成	好转	陈华	孙辽军	陈春慧	胫骨骨折切开复位钢板内固定术;膝关节的其他修补术;胫骨人工骨植骨术
3	C03眼科口腔	2024-05-10	2024-05-21	3503437	徐小燕	女	58Y	股骨干骨折	下肢静脉肌间血栓形成	好转	黄俊武	余贤斌	马亮亮	股骨骨折切开复位钢板内固定术;股骨人工骨植骨术
4	C03眼科口腔	2024-09-11	2024-09-22	3547702	王厚发	男	60Y	股骨粗隆间骨折	肺大疱;肺的其他疾患;后天性肾囊肿;前列腺结石;下肢动脉粥样硬化;下肢静脉血栓形成;冠状动脉粥样硬化	治愈	孙辽军	项光恒	项光恒	股骨骨折闭合复位髓内针内固定术;股骨人工骨植骨术
5	C04综合病房	2024-01-07	2024-01-20	3474718	王绍兴	男	81Y	腹股沟脓肿	肋骨多处骨折;腰椎骨折;肺挫伤;心包积液;心脏瓣膜病;肾结石;二尖瓣反流;非风湿性三尖瓣关闭不全;肾挛缩;肾盂积水;骨囊肿;后天性肾囊肿;腰椎退行性病变;胸椎退行性病变;下肢静脉肌间血栓形成	治愈	王飞海	周磊	潘传孟	腹股沟脓肿切开引流术;开腹探查术
6	C04综合病房	2024-01-17	2024-02-03	3478547	贺猛	男	31Y	创伤性脾破裂	腹腔积血;失血性休克;小肠损伤;结肠损伤;腰椎骨折;胸腔积液;下肢静脉血栓形成	治愈	杨越涛	杨越涛	洪滉	肠系膜修补术;脾修补术;小肠浆膜修补术;回肠结肠切除术;回肠造口术;开腹探查术
7	C04综合病房	2024-03-01	2024-03-09	3482747	卢碎华	男	57Y	手术后腹痛	头皮血肿;后天性脾缺失;主动脉夹层［任何部分］;寰枢关节扭伤;骨折治疗后恢复期;胸腔积液;肋骨骨折;多发性肝囊肿;后天性肾囊肿;静脉血栓形成;颈椎术后	好转	杨越涛	杨越涛	杨越涛	腹腔穿刺引流术
8	C04综合病房	2024-05-13	2024-07-20	3523474	陈承彪	男	68Y	创伤性脾破裂	创伤性肠破裂;小肠系膜出血伴血肿;腹腔感染;腹腔积血;感染性休克;小肠肿瘤;失血性休克;下消化道出血;肱骨骨折;肋骨骨折;尺骨桡骨闭合性骨折;手术后败血症;腹壁切口疝;肾积水伴肾输尿管结石;脂肪肝;多发性肝囊肿;静脉血栓形成	治愈	王飞海	周磊	洪滉	小肠破裂修补术;全脾切除术;气管切开异物取出术;肱骨骨折切开复位术;小肠部分切除术;腹腔镜中转剖腹探查术;腹腔冲洗检查;肠系膜修补术;关节软骨修复术;腹腔冲洗检查;桡神经探查术;桡骨植骨术
9	C04综合病房	2024-07-29	2024-08-15	3533354	陈宣有	男	60Y	创伤性脾破裂	腹腔积血;肝挫伤;硬脑膜下积液;头皮血肿;上颌骨骨折;鼻骨骨折;鼻中隔骨折;肋骨骨折;胸腔积液;牙龈开放性损伤;多处挫伤;肺不张;肺气肿;肺大疱;上肢皮肤裂伤;下肢静脉肌间血栓形成;脂肪瘤	治愈	王飞海	周磊	洪滉	全脾切除术;开腹探查术;腹腔冲洗检查
10	C06肿瘤放化疗、神经康复	2024-04-02	2024-06-30	3516036	吕阿菊	女	84Y	脑梗死	偏瘫;运动障碍;皮肤感觉障碍;吞咽困难;运动障碍;涉及使用康复操作的医疗;颈动脉硬化;下肢静脉肌间血栓形成;下肢动脉粥样硬化;心房颤动;高血压2级;2型糖尿病;股骨粗隆间骨折	好转	刘宝华	刘宝华	吕德钊	物理疗法;运动训练;低频脉冲电治疗;针灸;作业疗法
11	C06肿瘤放化疗、神经康复	2024-06-22	2024-07-09	3519415	虞位荣	男	84Y	偏瘫	运动障碍;运动障碍;出血性脑梗死;颈动脉狭窄;下肢静脉血栓形成;下肢动脉粥样硬化;腰椎骨折;冠状动脉粥样硬化性心脏病;高血压2级;老年性脑萎缩;前列腺增生;腹股沟斜疝;肾结石;腰椎间盘突出;骨质疏松;心房颤动;泌尿道感染;大脑中动脉狭窄	好转	刘宝华	商萍	吕德钊	低频脉冲电治疗;针灸;运动训练;物理疗法;日常生活动作训练;作业疗法
12	C06肿瘤放化疗、神经康复	2024-05-29	2024-07-13	3520529	叶云芳	男	68Y	脑梗死	运动障碍;运动障碍;吞咽困难;颈动脉狭窄;陈旧性肋骨骨折;颈椎退行性病变;肺肿物;下肢静脉血栓形成;单纯性肾囊肿;肝钙化灶;膀胱结石;肾结石;慢性咽炎;前列腺增生;慢性咽炎;前列腺结石	好转	刘宝华	商萍	戴威	经尿道膀胱镜膀胱激光碎石术;语言治疗;针灸;运动训练;作业疗法;物理疗法;电动起立床训练
13	C06肿瘤放化疗、神经康复	2024-06-21	2024-08-18	3534282	李云勤	女	46Y	胸椎骨折	胸部脊髓损伤;锁骨骨折;桡骨远端骨折;手骨折;创伤性血气胸;脑梗死;脑挫伤;腰椎骨折;肩胛骨骨折;肋骨骨折;颅底骨折;创伤性蛛网膜下腔出血;头皮裂伤;肺挫伤;肺部感染;下肢静脉肌间血栓形成;低蛋白血症;肝损害;累及神经和肌肉骨骼系统症状和体征;运动障碍;功能性吞咽困难	治愈	刘宝华	刘宝华	覃燕青	胸椎骨折切开复位内固定术;桡骨骨折切开复位钢板内固定术;胸腔穿刺术;关节运动训练;低频脉冲电治疗;物理疗法;其他控制气压和空气成分的疗法;温针灸治疗;胸腔穿刺术
14	C06肿瘤放化疗、神经康复	2024-09-21	2024-09-29	3550516	陈伟	男	34Y	截瘫	运动障碍;陈旧性胸椎骨折;陈旧性腰椎骨折;腰椎间盘突出;陈旧性胫骨平台骨折;精神分裂症;窦性心动过速;下肢静脉肌间血栓形成;高脂血症;脂肪肝;肝囊肿;胆囊结石;肝钙化灶;高尿酸血症;甲状腺结节;肾结石;后天性肾囊肿	好转	刘宝华	商萍	戴威	关节运动训练;作业疗法;电动起立床训练;其他物理治疗;温针灸治疗;运动训练
15	C06肿瘤放化疗、神经康复	2024-09-05	2024-10-27	3560772	谢成周	男	78Y	偏瘫	吞咽困难;混合性失语;神经源性膀胱;神经源性肠;运动障碍;涉及使用康复操作的医疗;脑梗死;脑梗死后遗症;特发性(原发性)高血压;骨质疏松伴有病理性骨折;抑郁状态;下肢静脉血栓形成;颈动脉硬化;肺气肿;低钾血症;肺部感染;肝功能检查的异常结果;下肢静脉血栓形成	好转	刘宝华	商萍	金翩翩	运动训练;日常生活动作训练;低频脉冲电治疗;作业疗法;电动起立床训练
16	C06肿瘤放化疗、神经康复	2024-11-02	2024-12-01	3574031	谢成周	男	78Y	偏瘫	吞咽困难;言语障碍;神经源性膀胱;神经源性肠;运动障碍;涉及使用康复操作的医疗;脑梗死;脑梗死后遗症;高血压;肺部感染;老年性骨质疏松伴病理性骨折;抑郁状态;肺气肿;肺气肿合并肺大泡;静脉血栓形成;下肢动脉粥样硬化	好转	刘宝华	商萍	金翩翩	运动训练;物理疗法;针灸;作业疗法
17	C06肿瘤放化疗、神经康复	2024-11-13	2024-12-18	3581608	杨建臣	男	73Y	消化道出血	失血性休克;细菌性肺炎;胸腔积液;脓毒血症;菌血症;低蛋白血症;运动障碍;吞咽困难;涉及使用康复操作的医疗;脑挫伤;创伤性蛛网膜下出血;颞骨骨折;骨盆骨折;肩关节脱位;骶骨骨折;多浆膜腔积液;气胸;创伤性皮下气肿;下肢静脉肌间血栓形成;甲状腺结节;食管炎;十二指肠球部溃疡	好转	刘宝华	商萍	覃燕青	胃镜检查;胸腔穿刺术;其他控制气压和空气成分的疗法;低频脉冲电治疗
18	C06肿瘤放化疗、神经康复	2024-11-13	2024-12-23	3583314	赵琴	女	64Y	脑梗死	运动障碍;偏瘫;言语障碍;功能性吞咽困难;认知障碍;神经源性膀胱;由于活动能力降低而需要帮助;涉及使用康复操作的医疗;轻度贫血;多发性脑梗死;下肢深静脉血栓形成;颈动脉狭窄;下肢动脉粥样硬化;颈动脉硬化;肺部感染;高血压;2型糖尿病;陈旧性肋骨骨折;脂肪肝;胆囊结石;肾结石	好转	刘宝华	商萍	戴威	运动训练;电动起立床训练;平衡功能训练;作业疗法;语言治疗;其他控制气压和空气成分的疗法;超声波联合治疗;超短波短波疗法;针灸;肺功能康复评定;低频脉冲电治疗
19	C10感染内科	2024-01-02	2024-01-10	3469464	朱秀琴	女	86Y	脓毒血症	中毒性脑病;软组织感染;特发性(原发性)高血压;下肢静脉肌间血栓形成;下肢动脉粥样硬化;老年性痴呆;腔隙性脑梗死;骨折术后恢复期;后天性肾囊肿	好转	周光耀	黄珊珊	黄珊珊
20	C10感染内科	2024-03-12	2024-03-26	3486713	张金英	女	91Y	感染性发热	下肢静脉血栓形成;高血压性心脏病;腔隙性脑梗死;阿尔茨海默病;主动脉硬化;胸椎压缩性骨折;骨质增生;胆囊息肉;后天性肾囊肿;胸椎椎管狭窄;冠状动脉粥样硬化;颈动脉硬化;下肢动脉粥样硬化;慢性乳突炎;晶状体疾患	治愈	周光耀	方佩佩2	林秀珍
21	C10感染内科	2024-04-08	2024-04-24	3495664	张金英	女	91Y	肠道感染	下肢静脉血栓形成;高血压性心脏病;腔隙性脑梗死;主动脉硬化;胸椎压缩性骨折;阿尔茨海默病;冠状动脉粥样硬化;颈动脉硬化;下肢动脉粥样硬化;胸椎椎管狭窄;晶状体疾患	治愈	周光耀	黄珊珊	黄珊珊
22	C10感染内科	2024-04-21	2024-04-25	3496114	周宝钗	女	88Y	真菌败血症	泌尿道念珠菌病;原发性腹膜炎;骨髓抑制;凝血功能障碍;中毒性心肌炎;甲状腺功能减退症;下肢深静脉血栓形成;高钠血症;高氯血症;低钾血症;受压区压疮;后天性肾囊肿;肾结石;骨折术后;眼术后	好转	周光耀	周光耀	黄珊珊
23	C10感染内科	2024-04-20	2024-04-30	3497554	戴方娟	女	80Y	中毒性心肌炎	脓毒血症;急性肾盂肾炎;肺部感染;急性呼吸衰竭（I型呼吸衰竭）;胸腔积液;高血压;2型糖尿病;老年性痴呆;子宫体脂肪瘤;甲状腺结节;多发性肝囊肿;胆囊结石;肾结石;下肢静脉血栓形成;乳腺术后;脑梗死后遗症;骨折术后;腹部诊断性影像异常;放射治疗史	好转	周光耀	周光耀	黄珊珊
24	C10感染内科	2024-06-13	2024-06-23	3513884	蔡碎花	女	88Y	脓毒血症	急性肾功能不全;急性胆囊炎;局限性腹膜炎;腹腔积液;肺恶性肿瘤;髂骨骨折;高血压;2型糖尿病;脑梗死后遗症;脑软化灶;多发性脑梗死;下肢静脉肌间血栓形成;下肢动脉粥样硬化;后天性肾囊肿	治愈	方佩佩2	周光耀	黄珊珊	颈内静脉穿刺中心静脉置管术
25	C11肾内科	2024-04-16	2024-05-05	3498904	王美英	女	77Y	肾透析的人工血管血栓形成	高血压性肾衰竭;慢性肾脏病5期;血液透析;脓毒血症;慢性胆囊炎;腔隙性脑梗死;甲状腺功能减退症;痛风;骨质疏松;腰椎骨折;手术后状态，其他特指的	好转	郑育	陈琰	徐晓燕2	动静脉造瘘后球囊扩张(用于肾透析);下肢静脉造影;下肢静脉置管溶栓术;动静脉造瘘后球囊扩张(用于肾透析);下肢静脉造影;下肢静脉置管溶栓术;血液透析
26	C11肾内科	2024-07-04	2024-07-23	3524581	钱雪松	男	71Y	慢性肾脏病5期	多囊肾;骨质疏松伴有病理性骨折;血液透析;2型糖尿病;前列腺恶性肿瘤;泌尿道感染;高血压性心脏病;肺大疱;颈动脉硬化;下肢动脉粥样硬化;下肢静脉血栓形成;肾术后	好转	毛朝鸣	徐晓燕2	黄文	血液透析
27	C11肾内科	2024-08-31	2024-09-16	3545243	柯国明	男	76Y	急性肾功能不全	肺部感染;下肢深静脉血栓形成;高血压;双相情感障碍;肺肿物;肝囊肿;后天性肾囊肿;前列腺增生;前列腺结石;陈旧性肋骨骨折	好转	郑育	黄文	彭杨培
28	D06(ICU)	2024-02-10	2024-02-28	3481205	李玉蕉	女	98Y	股骨粗隆间骨折	肺部感染;下肢静脉血栓形成;呼吸衰竭	治愈	龚裕强	林孟相	林孟相	股骨骨折闭合性复位术伴内固定
29	D06(ICU)	2024-05-14	2024-05-22	3504028	项引弟	女	73Y	创伤性硬膜下出血	创伤性脑疝;创伤性蛛网膜下腔出血;脑挫伤;头皮血肿;颧骨骨折;肺部感染;胸腔积液;陈旧性肋骨骨折;下肢静脉肌间血栓形成;肾错构瘤	好转	庄荣	陈德准	陈德准	颅骨去骨瓣减压术;颅内血肿清除术;硬脑膜补片修补术;脑内血肿清除术;呼吸机治疗[大于等于96小时];气管内插管
30	D06(ICU)	2024-07-06	2024-08-03	3529044	董如松	男	65Y	股骨粗隆下骨折	消化道出血;创伤性休克;腹股沟损伤;创伤后伤口感染;脂肪栓塞(创伤性);骨盆骨折;脑梗死，其他的;肛门损伤;鼻骨骨折;下肢静脉肌间血栓形成;多发性腰椎骨折;肺部感染;肺大疱;开放性臀部损伤;骨盆肌肉损伤;肋骨多处骨折	死亡	龚裕强	龚裕强	胡建坚	股骨骨折闭合复位髓内针内固定术;经导管髂内动脉栓塞术;髌骨骨折切开复位张力带钢丝内固定术;皮肤和皮下坏死组织切除清创术;创面封闭式负压引流术（VSD);关节软骨修复术;肛门成形术;肛门裂伤缝合术;结肠造口术;开腹探查术;皮肤和皮下坏死组织切除清创术
31	D06(ICU)	2024-09-19	2024-09-22	3547777	朱启冲	男	57Y	创伤性蛛网膜下腔出血	创伤性闭合性硬膜外血肿;脑挫伤;创伤性小脑出血;枕骨骨折;皮下血肿;肺部感染;胸腔积液;下肢深静脉血栓形成	未愈	庄荣	高叶	戴洲豪	脑膜切开伴硬脑膜下腔血肿清除术;颅骨钻孔减压术;呼吸机治疗[小于96小时];气管内插管;颈内静脉穿刺中心静脉置管术
32	D06(ICU)	2024-10-16	2024-10-19	3557500	胡美球	女	65Y	创伤性硬脑膜下出血	创伤性蛛网膜下腔出血;创伤性脑出血;创伤性小脑血肿;肺部感染;肋骨骨折;下肢深静脉血栓形成;后天性肾囊肿	未愈	庄荣	戴洲豪	戴洲豪	气管内插管;颈内静脉穿刺中心静脉置管术;呼吸机治疗[大于等于96小时]
33	D06(ICU)	2024-10-22	2024-11-09	3565907	胡太生	男	76Y	胸椎多处骨折	神经源性休克;脊髓损伤;肋骨骨折;呼吸衰竭;肺部感染;创伤性皮下气肿;气胸;胸腔积液;下肢静脉血栓形成;多发性脑梗死;膀胱结石;前列腺增生;老年性脑萎缩	治愈	龚裕强	龚裕强	李慧3	呼吸机治疗[大于等于96小时];股静脉穿刺置管术;胸腔闭式引流术;胸腔闭式引流术;气管内插管
34	D07儿童骨科、骨盆外科	2023-12-19	2024-01-01	3465713	陈林弟	女	90Y	股骨粗隆间骨折	骨质疏松;髋关节退行性病变;高血压;肺部感染;心功能不全;肝囊肿;胆囊息肉;后天性肾囊肿;肺诊断性影像异常;肺气肿;胸腔积液;下肢静脉血栓形成	好转	翁益民	翁益民	王特	股骨骨折闭合复位髓内针内固定术
35	D07儿童骨科、骨盆外科	2023-12-20	2024-01-02	3466089	张素叶	女	78Y	股骨颈骨折	高血压;糖尿病;睡眠障碍;脂肪肝;甲状腺术后;下肢静脉血栓形成;心功能不全	治愈	孔建中	胡炜	陈墨川	全髋关节置换;髋轴面，陶瓷与聚乙烯;髋关节滑膜切除术
36	D07儿童骨科、骨盆外科	2023-12-13	2024-01-07	3468205	陈良平	女	59Y	锁骨骨折	耻骨骨折;三根肋骨骨折不伴第一肋骨骨折;心功能不全;胆囊结石;下肢静脉血栓形成	好转	翁益民	翁益民	王特	锁骨骨折切开复位钢板内固定术
37	D07儿童骨科、骨盆外科	2024-01-01	2024-01-13	3470958	金凤娥	女	88Y	股骨粗隆间骨折	高血压;膝关节退行性病变;下肢静脉血栓形成;心功能不全;肺诊断性影像异常;脂肪肝;胆囊结石;腘窝囊肿	好转	翁益民	翁益民	王特	股骨骨折闭合复位髓内针内固定术
38	D07儿童骨科、骨盆外科	2024-01-09	2024-01-18	3473801	虞洪权	男	83Y	股骨粗隆间骨折	肺气肿合并肺大泡;肺部阴影;肺部感染;胸腔积液;心房颤动;胸椎多处骨折;胸椎退行性病变;颈动脉硬化;下肢静脉血栓形成;下肢静脉曲张;骨折术后;上肢动脉粥样硬化;胆囊结石伴慢性胆囊炎;肝囊肿;后天性肾囊肿	治愈	孔建中	陈墨川	胡炜	股骨骨折闭合复位螺钉内固定术
39	D07儿童骨科、骨盆外科	2024-01-07	2024-01-18	3473864	周查清	女	70Y	肱骨外科颈骨折	肩袖损伤;高血压;脂肪肝;下肢静脉血栓形成	好转	翁益民	翁益民	王特	肱骨骨折切开复位钢板内固定术;肩袖修补术
40	D07儿童骨科、骨盆外科	2024-01-06	2024-01-22	3475746	金美丽	女	80Y	股骨下端骨折	骨折术后;心房颤动;高血压;糖尿病;肺部感染;肺诊断性影像异常;心功能不全;胆管结石;下肢动脉粥样硬化;下肢静脉血栓形成	好转	翁益民	翁益民	王特	股骨骨折切开复位钢板内固定术
41	D07儿童骨科、骨盆外科	2024-01-08	2024-02-04	3478737	连雪英	女	51Y	骨盆骨折	骶髂关节脱位;多发性腰椎骨折;骶骨骨折;马尾损伤;肱骨骨折;肋骨骨折;低蛋白血症;低钾血症;贫血;创伤性湿肺;胸腔积液;腹腔积液;腹腔积血;肝囊肿;胆囊息肉;后天性肾囊肿;创伤性肾血肿;下肢静脉血栓形成	治愈	孔建中	胡炜	陈墨川	经导管髂内动脉栓塞术;髂动脉造影;骨盆骨折切开复位钢板内固定术;脊椎骨折切开复位内固定术;椎管减压术;肱骨骨折切开复位髓内针内固定术
42	D07儿童骨科、骨盆外科	2024-01-11	2024-02-10	3479390	赵红英	女	71Y	胫骨平台伴腓骨骨折	胫骨干骨折;胸腔积液;肝脂肪瘤;肝钙化灶;下肢静脉血栓形成;后天性肾囊肿;贫血;低蛋白血症	治愈	孔建中	胡炜	陈墨川	胫骨骨折切开复位钢板内固定术;关节软骨修复术;胫骨植骨术
43	D07儿童骨科、骨盆外科	2024-02-16	2024-02-25	3480718	颜贻蔡	男	73Y	胫骨平台骨折	高血压;下肢深静脉血栓形成;艾滋病	治愈	孔建中	陈墨川	胡炜	胫骨骨折切开复位钢板内固定术;关节软骨修复术;同种异体骨植骨术
44	D07儿童骨科、骨盆外科	2024-02-17	2024-02-27	3480988	周美花	女	93Y	股骨粗隆间骨折	高血压;肝囊肿;胆囊结石;后天性肾囊肿;下肢深静脉血栓形成;低蛋白血症	治愈	孔建中	胡炜	陈墨川	股骨骨折闭合复位螺钉内固定术
45	D07儿童骨科、骨盆外科	2024-02-18	2024-03-02	3481529	章爱芳	女	82Y	股骨颈骨折	高血压;手术后状态，其他特指的;后天性肾囊肿;人工膝关节;脂肪肝;下肢动脉粥样硬化;下肢静脉血栓形成;肾后天性缺失;肺诊断性影像异常	好转	胡炜	胡炜	陈墨川	人工股骨头置换术;髋关节滑膜切除术
46	D07儿童骨科、骨盆外科	2024-02-24	2024-03-05	3482046	陈碎眉	女	82Y	股骨粗隆间骨折	心功能不全;下肢静脉血栓形成;高血压	好转	翁益民	翁益民	王特	股骨骨折闭合复位髓内针内固定术
47	D07儿童骨科、骨盆外科	2024-02-27	2024-03-09	3482769	陈兰香	女	90Y	股骨粗隆间骨折	肋骨多处骨折;心功能不全;下肢静脉血栓形成;胆囊息肉;后天性肾囊肿;肝回声不均;高血压	好转	翁益民	翁益民	王特	股骨骨折闭合复位髓内针内固定术
48	D07儿童骨科、骨盆外科	2024-02-16	2024-03-10	3482959	夏洪玉	女	75Y	肱骨髁间骨折	尺骨茎突骨折伴桡骨远端骨折;肱骨近端骨折;高血压;肾结石;肋骨多处骨折;肺诊断性影像异常;糖尿病;下肢静脉血栓形成;肌肉骨骼系统其他部位诊断性影像检查的异常所见	治愈	孔建中	胡炜	陈墨川	肱骨骨折切开复位钢板内固定术;关节软骨修复术;肱骨植骨术;桡骨骨折闭合复位螺钉内固定术;人工肱骨头置换术;肩关节成形术;肱骨植骨术
49	D07儿童骨科、骨盆外科	2024-03-12	2024-03-24	3486197	郑金兰	女	67Y	股骨颈骨折	骨质疏松;下肢静脉血栓形成;心功能不全;肺间质纤维化	好转	翁益民	翁益民	王特	全髋关节置换;髋轴面，陶瓷与金属
50	D07儿童骨科、骨盆外科	2024-03-23	2024-03-30	3487784	潘凤彩	女	90Y	股骨颈骨折	颈动脉硬化;下肢静脉血栓形成;肝钙化灶;肝囊肿;心包积液	治愈	孔建中	胡炜	陈墨川	人工股骨头置换术;髋关节滑膜切除术
51	D07儿童骨科、骨盆外科	2024-03-26	2024-03-30	3488047	周秋微	女	47Y	股骨骨折	多发性肝囊肿;陈旧性肋骨骨折;肺诊断性影像异常;支气管扩张伴感染;下肢静脉血栓形成	治愈	孔建中	胡炜	陈墨川	股骨骨折闭合复位髓内针内固定术
52	D07儿童骨科、骨盆外科	2024-03-28	2024-04-10	3491165	林美钗	女	74Y	锁骨骨折	两根肋骨骨折不伴第一肋骨骨折;坐骨骨折;脂肪肝;心功能不全;下肢静脉血栓形成;腔隙性脑梗死;颈椎病;高血压;糖尿病	好转	翁益民	翁益民	王特	锁骨骨折切开复位钢板内固定术
53	D07儿童骨科、骨盆外科	2024-04-07	2024-04-13	3492095	柯寿明	男	80Y	股骨粗隆间骨折	股骨头缺血性坏死;下肢动脉粥样硬化;下肢静脉血栓形成;肝囊肿;肾结石;髋关节退行性病变	治愈	孔建中	胡炜	胡炜	股骨骨折闭合复位螺钉内固定术
54	D07儿童骨科、骨盆外科	2024-04-06	2024-04-15	3492916	杨礼官	男	87Y	股骨粗隆间骨折	高血压;胆囊结石;前列腺增生;前列腺结石;桡骨远端骨折;下肢静脉血栓形成	治愈	孔建中	胡炜	胡炜	股骨骨折切开复位钢板内固定术;股骨植骨术
55	D07儿童骨科、骨盆外科	2024-05-07	2024-05-18	3502422	吴秀珠	女	84Y	股骨颈骨折	脑震荡;头皮血肿;多处挫伤;腰骶椎间盘突出;轻度贫血;冠状动脉支架植入后状态;上颌窦炎;陈旧性肺结核;后天性肾囊肿;心功能不全;下肢静脉血栓形成;胃部分后天性缺失	好转	翁益民	翁益民	王特	人工股骨头置换术
56	D07儿童骨科、骨盆外科	2024-04-22	2024-05-27	3505328	张国俊	男	54Y	在大腿水平的后部肌群和肌腱损伤	大腿撕脱伤;开放性股骨粗隆下骨折;多处挫伤;胸椎压缩性骨折;多发性腰椎骨折;腰椎椎管狭窄;创伤性气胸;创伤性胸腔积液;胸腰椎椎间盘突出;腹膜后血肿;神经源性膀胱;颈椎病;前列腺囊肿;下肢静脉血栓形成	治愈	翁益民	翁益民	王特	下肢肌肉缝合术;皮肤和皮下坏死组织切除清创术;创面封闭式负压引流术（VSD);肌腱、血管、神经探查术;皮肤缝合术;下腔静脉滤器置入术;股骨骨折闭合复位髓内针内固定术;腰椎骨折切开复位内固定术
57	D07儿童骨科、骨盆外科	2024-05-29	2024-06-09	3509388	张陈奎	男	70Y	股骨颈骨折	下肢动脉粥样硬化;下肢静脉血栓形成;肾结石;前列腺增生;前列腺结石;肺部阴影;胸主动脉粥样硬化;冠状动脉粥样硬化;主动脉瓣钙化;胃部分后天性缺失	好转	孔建中	陈墨川	陈墨川	全髋关节置换;髋关节滑膜切除术;髋轴面，金属与聚乙烯
58	D07儿童骨科、骨盆外科	2024-06-10	2024-06-17	3512031	周夏玉	女	76Y	股骨颈骨折	高血压;糖尿病;脂肪肝;心功能不全;心房肥大;退行性主动脉瓣疾患;二尖瓣及主动脉瓣关闭不全;肾盂扩张;下肢静脉血栓形成	好转	翁益民	翁益民	蔡乐益	人工股骨头置换术;股骨植骨术;髋轴面，金属与聚乙烯
59	D07儿童骨科、骨盆外科	2024-06-08	2024-06-19	3512680	徐小兰	女	63Y	股骨颈骨折	脂肪肝;肝囊肿;后天性肾囊肿;心功能不全;退行性主动脉瓣疾患;二尖瓣及主动脉瓣关闭不全;下肢静脉血栓形成	好转	翁益民	翁益民	蔡乐益	全髋关节置换;髋关节滑膜切除术;髋轴面，陶瓷与金属
60	D07儿童骨科、骨盆外科	2024-06-22	2024-07-01	3516319	卢碎妹	女	95Y	股骨多处骨折	肝回声不均;肾超声检查异常;下肢静脉血栓形成;退行性主动脉瓣疾患;二尖瓣及主动脉瓣关闭不全;心功能不全	好转	翁益民	翁益民	蔡乐益	股骨骨折闭合复位髓内针内固定术
61	D07儿童骨科、骨盆外科	2024-06-15	2024-07-03	3516996	徐贤香	女	86Y	股骨颈骨折	心力衰竭;高血压;心房颤动;下肢动脉粥样硬化;肝囊肿;肝血管瘤;后天性肾囊肿;肺动脉高压重度;下肢静脉血栓形成	好转	孔建中	陈墨川	陈墨川	人工股骨头置换术;髋关节滑膜切除术;髋轴面，金属与聚乙烯
62	D07儿童骨科、骨盆外科	2024-06-17	2024-07-15	3521698	胡念春	男	67Y	耻骨骨折	三根肋骨骨折不伴第一肋骨骨折;多发性腰椎骨折;眶骨骨折;受压区压疮;后天性肾囊肿;前列腺钙化灶;多发性脑梗死;脱髓鞘性脑病;胸腔积液;肺部阴影;创伤性湿肺;下肢静脉血栓形成;腰椎椎管狭窄	治愈	孔建中	陈墨川	陈墨川	骨盆骨折切开复位钢板内固定术;腰椎骨折切开复位内固定术;骶髂关节融合术;经导管髂内动脉栓塞术;髂动脉造影
63	D07儿童骨科、骨盆外科	2024-07-15	2024-07-20	3523430	徐松妹	女	71Y	多发性腰椎骨折	胸椎骨折;腰椎退行性病变;下肢动脉粥样硬化;肝囊肿;胆囊结石;下肢静脉血栓形成	治愈	孔建中	陈墨川	陈墨川	腰椎骨折球囊扩张成形术;胸椎骨折球囊扩张成形术
64	D07儿童骨科、骨盆外科	2024-07-09	2024-07-23	3524770	张国民	男	57Y	双踝骨折	多处挫伤;下肢静脉血栓形成;腰椎退行性病变;腰椎侧弯;腰骶椎间盘突出;肝回声不均;心功能不全	好转	翁益民	翁益民	蔡乐益	踝关节骨折切开复位钢板内固定术;关节软骨修复术;踝融合术
65	D07儿童骨科、骨盆外科	2024-07-11	2024-08-01	3527948	季小梅	男	68Y	前臂伸肌腱损伤	腓骨骨折;髌韧带损伤;踝开放性伤口;膝开放性伤口;足挫伤;开放性前臂损伤;肾功能不全;肝回声不均;后天性肾囊肿;下肢静脉血栓形成	好转	翁益民	翁益民	蔡乐益	肌腱、血管、神经探查术;石膏绷带固定;前臂肌腱缝合术;皮肤和皮下坏死组织切除清创术;创面封闭式负压引流术（VSD);髌韧带缝合术
66	D07儿童骨科、骨盆外科	2024-07-23	2024-08-03	3528446	童阿芝	女	90Y	股骨颈骨折	高血压;肺大疱;脂肪肝;胆囊结石;胆总管扩张;主动脉钙化;冠状动脉粥样硬化;下肢静脉血栓形成;肺部感染	治愈	孔建中	陈墨川	陈墨川	人工股骨头置换术;髋轴面，金属与聚乙烯
67	D07儿童骨科、骨盆外科	2024-08-01	2024-08-18	3534332	李素芬	女	49Y	髋臼骨折	耻骨骨折;泌尿道感染;肝硬化;胸腔积液;下肢静脉血栓形成	治愈	孔建中	陈墨川	陈墨川	骨盆骨折切开复位钢板内固定术;关节软骨修复术
68	D07儿童骨科、骨盆外科	2024-08-14	2024-08-24	3536856	张玉妹	女	87Y	股骨粗隆间骨折	骨折术后;下肢静脉血栓形成;肺肿物;胸部肿物;胆囊结石;后天性肾囊肿	治愈	孔建中	陈墨川	陈墨川	股骨骨折闭合复位螺钉内固定术;股骨植骨术
69	D07儿童骨科、骨盆外科	2024-08-23	2024-08-31	3539676	林香姐	女	80Y	股骨颈骨折	下肢静脉血栓形成;房性期前收缩[房性早搏];室性期前收缩;多发性肝囊肿;后天性肾囊肿;胸椎骨折;腰椎骨折;膝关节退行性病变;骨和关节软骨动态未定或动态未知的肿瘤;食管裂孔疝;心脏和冠状循环诊断性影像检查的异常所见	治愈	孔建中	陈墨川	陈墨川	人工股骨头置换术;髋轴面，金属与聚乙烯;髋关节滑膜切除术;下腔静脉滤器置入术;下肢静脉造影
70	D07儿童骨科、骨盆外科	2024-08-22	2024-09-09	3542802	陈蓉	女	81Y	股骨粗隆间骨折	冠状动脉粥样硬化性心脏病;十二指肠溃疡;胸腔积液;主动脉钙化;下肢静脉血栓形成;颈动脉硬化;肝血管瘤	治愈	孔建中	余贤斌	余贤斌	股骨骨折闭合复位螺钉内固定术
71	D07儿童骨科、骨盆外科	2024-09-12	2024-09-23	3547954	卢岳良	男	76Y	股骨颈骨折	下肢静脉血栓形成;高血压;心功能不全;脂肪肝;后天性肾囊肿;肾结石;前列腺结石	治愈	孔建中	余贤斌	余贤斌	全髋关节置换;髋关节滑膜切除术;髋轴面，陶瓷与聚乙烯
72	D07儿童骨科、骨盆外科	2024-09-26	2024-10-03	3551968	金林娇	女	69Y	股骨颈骨折	十二指肠恶性肿瘤;肝继发恶性肿瘤;低蛋白血症;肺部感染;肺肿物;肝囊肿;后天性肾囊肿;肾结石;肺气肿;主动脉钙化;下肢静脉肌间血栓形成;卵巢占位性病变;髋关节退行性病变;下肢动脉粥样硬化	好转	孔建中	余贤斌	余贤斌
73	D07儿童骨科、骨盆外科	2024-10-09	2024-10-21	3558242	陈碎尧	男	77Y	股骨粗隆下骨折	2型糖尿病;膝关节退行性病变;后天性肾囊肿;骨疾患;下肢静脉血栓形成	好转	翁益民	翁益民	王特	股骨骨折切开复位髓内针内固定术;股骨植骨术
74	D07儿童骨科、骨盆外科	2024-10-31	2024-11-08	3565435	胡春三	女	86Y	股骨粗隆间骨折	下肢深静脉血栓形成;肺肿物;肺部感染;后天性肾囊肿;心功能不全;心房颤动;心包积液	治愈	水小龙	水小龙	徐宏威	股骨骨折切开复位髓内针内固定术;下腔静脉滤器置入术;下腔静脉造影
75	D07儿童骨科、骨盆外科	2024-10-24	2024-11-09	3565863	宋志荣	男	49Y	髂骨骨折	清创术后;创伤性肾血肿;脂肪肝;肺部阴影;胸腔积液;下肢深静脉血栓形成	治愈	翁益民	翁益民	汤嘉豪	髂骨植骨术;髂骨骨折切开复位钢板内固定术
76	D07儿童骨科、骨盆外科	2024-12-16	2024-12-23	3583263	叶道明	男	87Y	股骨粗隆间骨折	下肢静脉血栓形成;胫动脉粥样硬化;脂肪肝;多发性肝囊肿;后天性肾囊肿;肾结石;前列腺增生;前列腺结石;间质性肺病;肺部阴影;主动脉钙化;冠状动脉粥样硬化	治愈	黄义星	黄义星	郭伟军	股骨骨折闭合复位髓内针内固定术
77	D08(骨病)	2023-12-24	2024-01-03	3466581	石福平	男	63Y	膝半月板撕裂	膝关节外侧副韧带损伤;痛风;外踝骨折;特发性(原发性)高血压;二尖瓣关闭不全;脂肪肝;前列腺结石;下肢静脉曲张;下腔静脉血栓形成	治愈	胡月正	柳海晓	许心弦	膝关节镜下半月板成形术
78	D08(骨病)	2024-01-01	2024-01-06	3467690	严城花	女	82Y	股骨粗隆间骨折	特发性(原发性)高血压;2型糖尿病;肺部感染;胸腔积液;下肢静脉血栓形成;陈旧性肋骨骨折	治愈	张宇	陈成旺	林剑2	股骨骨折闭合复位髓内针内固定术
79	D08(骨病)	2024-01-06	2024-01-10	3469990	薛正明	男	82Y	脊柱继发恶性肿瘤	截瘫;胸椎骨折;骨质疏松，其他的;脊柱侧弯;腰椎退行性病变;后天性肾囊肿;前列腺增生;前列腺结石;下肢静脉血栓形成	未愈	王向阳	窦海成	陈泽新
80	D08(骨病)	2024-01-26	2024-02-03	3478566	董希森	男	83Y	股骨颈骨折	高血压;尿毒症;2型糖尿病性肾病;2型糖尿病;肾性贫血;高尿酸血症;心房颤动;胸腔积液;心包积液;主动脉的动脉粥样硬化;主动脉血栓形成;胆囊息肉;后天性肾囊肿;前列腺增生;前列腺结石;心功能不全;肺动脉高压;二尖瓣及主动脉瓣关闭不全	好转	冯永增	冯永增	卢迪
81	D08(骨病)	2024-01-29	2024-02-28	3481149	陈细友	男	53Y	股骨干骨折	膝关节后十字韧带损伤;膝关节内侧副韧带损伤;两根肋骨骨折不伴第一肋骨骨折;下肢静脉血栓形成;高血压	治愈	胡月正	柳海晓	许心弦	股骨骨折闭合复位髓内针内固定术;关节镜膝关节后交叉韧带重建术;关节镜膝关节副韧带修补术;异体肌腱移植术
82	D08(骨病)	2024-02-19	2024-03-02	3481525	郑奎崇	男	85Y	股骨颈骨折	老年性心脏病;肝囊肿;胆囊结石;肾结石;后天性肾囊肿;前列腺增生;下肢静脉血栓形成	治愈	胡月正	柳海晓	许心弦	人工股骨头置换术;髋轴面，陶瓷与聚乙烯;髋关节滑膜切除术
83	D08(骨病)	2024-03-16	2024-03-23	3486013	郭春龙	男	83Y	髌骨骨折	下肢静脉肌间血栓形成;后天性肾囊肿;前列腺增生;下肢动脉粥样硬化	治愈	张宇	陈成旺	李振兴	髌骨骨折切开复位张力带钢丝内固定术
84	D08(骨病)	2024-03-18	2024-03-25	3486670	李启聪	男	77Y	股骨颈骨折	由于禁忌证而未进行操作;胸椎压缩性骨折;慢性支气管炎伴肺气肿;肺部感染;二尖瓣及主动脉瓣关闭不全;肺动脉高压中度;肝钙化灶;肝囊肿;后天性肾囊肿;肾结石;前列腺增生;前列腺结石;下肢静脉血栓形成	好转	张宇	陈成旺	李振兴
85	D08(骨病)	2024-03-27	2024-04-06	3489854	周大同	男	62Y	跟骨骨折	脂肪肝;后天性肾囊肿;前列腺增生;前列腺结石;下肢静脉血栓形成	治愈	胡月正	柳海晓	许心弦	跟骨骨折切开复位钢板内固定术;跟骨人工骨植骨术;踝关节镜下软骨修复术
86	D08(骨病)	2024-04-03	2024-04-13	3492004	黄安叶	女	87Y	股骨颈骨折	高血压;2型糖尿病;下肢静脉血栓形成;肺的其他疾患	治愈	薛恩兴	樊沛	童珉基	人工股骨头置换术;髋轴面，陶瓷与聚乙烯
87	D08(骨病)	2024-04-15	2024-04-22	3495160	姚福珍	女	78Y	股骨颈骨折	肝囊肿;下肢静脉血栓形成	治愈	张宇	樊沛	童珉基	人工双动股骨头置换术
88	D08(骨病)	2024-04-20	2024-04-27	3496724	林仁英	男	53Y	胫骨平台骨折	肺诊断性影像异常;肝大;下肢静脉血栓形成;慢性乙型病毒性肝炎	治愈	薛恩兴	薛恩兴	童珉基	胫骨骨折切开复位钢板内固定术
89	D09(创伤1)	2024-01-14	2024-01-22	3475850	吴定翠	女	86Y	股骨粗隆间骨折	高血压;2型糖尿病;下肢静脉血栓形成;胆囊结石	治愈	汤骏	吴剑彬	潘天龙	股骨骨折闭合复位髓内针内固定术
90	D09(创伤1)	2024-01-13	2024-01-23	3476804	董桂花	女	81Y	股骨粗隆间骨折	特发性(原发性)高血压;糖尿病;类风湿性关节炎;后天性肾囊肿;静脉血栓形成;老年性心脏病	治愈	周一飞	周一飞	白炳力	股骨骨折闭合复位髓内针内固定术
91	D09(创伤1)	2024-01-18	2024-01-31	3478133	苏兰妹	女	83Y	插入矫形外科关节假体后骨折	静脉血栓形成;下肢动脉粥样硬化;后天性肾囊肿;肝囊肿;下肢静脉血栓形成;肺动脉扩张;主动脉瓣疾患;心功能不全	治愈	陈龙	应晓洲	应晓洲	股骨骨折切开复位钢板内固定术
92	D09(创伤1)	2024-02-05	2024-02-19	3480135	易济珍	女	77Y	闭合性胫骨平台骨折	下肢静脉血栓形成;下肢动脉粥样硬化;后天性肾囊肿;肾结石;高血压;室间隔肥大;退行性主动脉瓣疾患;心功能不全	治愈	陈龙	应晓洲	应晓洲	胫骨骨折切开复位钢板内固定术;关节软骨修复术;胫骨植骨术
93	D09(创伤1)	2024-02-11	2024-02-28	3481098	姜孟亮	男	53Y	股骨粗隆间骨折	股骨干骨折;下肢静脉血栓形成;肝功能检查的异常结果;后天性肾囊肿;肺诊断性影像异常;胆囊息肉;肾包膜下积液;肾超声检查异常	治愈	陈龙	应晓洲	应晓洲	股骨骨折闭合复位髓内针内固定术
94	D09(创伤1)	2024-02-28	2024-03-19	3485097	陈光建	男	67Y	胫腓骨闭合性骨折	肺部感染;下肢静脉血栓形成;主动脉瓣疾患，其他的;胆囊息肉;胆总管扩张;下肢动脉粥样硬化;下肢静脉曲张	治愈	陈龙	应晓洲	应晓洲	胫骨骨折切开复位钢板内固定术;骨移植术
95	D09(创伤1)	2024-03-05	2024-03-19	3485125	黄小云	女	36Y	股骨干骨折	肝功能检查的异常结果;下肢静脉血栓形成;中度贫血;肾结石	治愈	陈龙	应晓洲	应晓洲	股骨骨折闭合复位髓内针内固定术
96	D09(创伤1)	2024-03-09	2024-03-26	3486899	吴梅菊	女	82Y	股骨粗隆间骨折	骨质疏松，其他的;特发性(原发性)高血压;2型糖尿病;老年性心脏病;胆囊结石;下肢动脉粥样硬化;下肢静脉血栓形成;下肢静脉功能不全;肺部感染;肺间质纤维化;主动脉钙化;甲状腺结节	治愈	赵友明	赵友明	汪吉棋	股骨骨折闭合复位髓内针内固定术
97	D09(创伤1)	2024-04-01	2024-04-04	3489615	严陈氏	女	93Y	股骨粗隆间骨折	非器质性精神病;静脉血栓形成;老年性心脏病;受压区压疮	治愈	杨雷	周一飞	白炳力
98	D09(创伤1)	2024-03-18	2024-04-07	3490279	陈光榜	男	59Y	跟骨骨折	距骨骨折;桡骨远端骨折;老年性心脏病;下肢静脉肌间血栓形成;脂肪肝	治愈	赵友明	柯陈荣	汪吉棋	跟骨骨折切开复位钢板内固定术;关节软骨修复术;骨移植术;石膏绷带固定
99	D09(创伤1)	2024-03-30	2024-04-08	3490425	孙冬彩	女	88Y	尺骨和桡骨下端均骨折	老年性心脏病;肺诊断性影像异常;肾结石;后天性肾囊肿;主动脉硬化;下肢动脉粥样硬化;下肢静脉血栓形成;肺恶性肿瘤;主动脉瓣钙化	治愈	赵友明	柯陈荣	汪吉棋	桡骨骨折切开复位钢板内固定术;关节软骨修复术;石膏绷带固定
100	D09(创伤1)	2024-04-18	2024-04-27	3496900	周月娥	女	84Y	股骨粗隆间骨折	肺部感染;创伤性胸腔积液;陈旧性肋骨骨折;心包积液;单纯性肾囊肿;肝囊肿;下肢静脉血栓形成;老年性心脏病;主动脉钙化;脾占位性病变;膀胱憩室结石;下肢静脉血栓形成	治愈	杨雷	方文来	方文来	股骨骨折闭合复位髓内针内固定术
101	D09(创伤1)	2024-04-17	2024-04-28	3497123	刘花	女	88Y	股骨粗隆间骨折	高血压;老年性心脏病;下肢静脉血栓形成;脂肪肝;肾结石	治愈	杨雷	方文来	方文来	股骨骨折闭合复位髓内针内固定术
102	D09(创伤1)	2024-04-23	2024-05-01	3498089	戴本花	女	91Y	股骨颈骨折	支气管扩张(症);轻度肺动脉高压;下肢静脉肌间血栓形成;下肢动脉粥样硬化;肺诊断性影像异常;肺气肿合并肺大泡;主动脉瓣钙化	治愈	陈龙	应晓洲	应晓洲	人工股骨头置换术;髋关节滑膜切除术
103	D09(创伤1)	2024-05-14	2024-05-16	3502049	叶娒弟	女	92Y	股骨粗隆间骨折	高血压;下肢静脉血栓形成;肝囊肿;心房肥大;室间隔肥大;退行性主动脉瓣疾患;主动脉(瓣)关闭不全;心功能不全	治愈	陈龙	陈龙	应晓洲	下腔静脉造影;股静脉穿刺术
104	D09(创伤1)	2024-05-14	2024-05-22	3503871	李永英	女	70Y	股骨髁间骨折	静脉栓塞和血栓形成;下肢静脉肌间血栓形成;肝功能不全	治愈	陈龙	应晓洲	应晓洲	股骨骨折切开复位钢板内固定术;下腔静脉滤器置入术;股静脉穿刺置管术;关节软骨修复术;骨移植术
105	D09(创伤1)	2024-05-20	2024-05-26	3504956	郑三妹	女	94Y	股骨粗隆间骨折	下肢深静脉血栓形成;高血压2级;肺占位性病变;肺动脉高压;室性期前收缩;完全性右束支传导阻滞;室性期前收缩;肝回声不均;后天性肾囊肿;股骨颈骨折	好转	冯永增	冯永增	王贤亮	股骨骨折闭合复位髓内针内固定术;下肢静脉造影;股静脉穿刺术;下腔静脉滤器置入术
106	D09(创伤1)	2024-05-21	2024-05-28	3505612	姜勤飞	女	67Y	胫骨下端骨折	骨质疏松;陈旧性距骨骨折;陈旧性肱骨骨折;陈旧性肩胛骨骨折;下肢静脉血栓形成;左前分支传导阻滞;心功能不全;泌尿道感染	好转	黄俊武	余贤斌	马亮亮	胫骨骨折切开复位钢板内固定术;关节软骨修复术;胫骨植骨术
107	D09(创伤1)	2024-05-22	2024-06-07	3508713	黄开通	男	78Y	胫骨下端骨折	胆囊结石;胸腔积液;下肢静脉血栓形成;脱髓鞘性脑病;老年性脑萎缩;心功能不全;低蛋白血症	治愈	黄俊武	余贤斌	马亮亮	胫骨骨折切开复位钢板内固定术;关节软骨修复术;胫骨植骨术
108	D09(创伤1)	2024-06-14	2024-06-21	3513384	欧贵华	女	74Y	股骨粗隆间骨折	多发性脑梗死;肋骨骨折;胆囊结石;后天性肾囊肿;下肢静脉肌间血栓形成;老年性心脏病;肺动脉高压;心房颤动;心房肥大;主动脉(瓣)关闭不全;心功能不全	治愈	水小龙	水小龙	汪吉棋	股骨骨折闭合复位髓内针内固定术
109	D09(创伤1)	2024-07-20	2024-07-31	3527654	柯道进	男	80Y	股骨粗隆下骨折	特发性(原发性)高血压;脑卒中后遗症;特发性肺纤维化;后天性肾囊肿;肝囊肿;颈动脉硬化;下肢静脉血栓形成	治愈	孔建中	陈墨川	陈墨川	股骨骨折切开复位螺钉内固定术;骨移植术
110	D09(创伤1)	2024-08-04	2024-08-13	3532339	胡娟娣	女	66Y	股骨远端骨折	膝关节退行性病变;先天性膝关节滑膜骨软骨瘤病;老年性心脏瓣膜病;下肢静脉肌间血栓形成	治愈	水小龙	水小龙	汪吉棋	股骨骨折切开复位钢板内固定术;股骨植骨术
111	D09(创伤1)	2024-08-06	2024-08-18	3534522	郑美兰	女	71Y	肱骨大结节骨折	脂肪肝;后天性肾囊肿;下肢动脉粥样硬化;肺诊断性影像异常;主动脉钙化;下肢静脉血栓形成	治愈	孔建中	陈墨川	陈墨川	肱骨骨折切开复位钢板内固定术
112	D09(创伤1)	2024-08-08	2024-08-19	3534626	任春云	女	75Y	股骨粗隆间骨折	下肢静脉血栓形成;急性失血性贫血;陈旧性锁骨骨折;高血压;脂肪肝;肝囊肿;后天性肾囊肿;2型糖尿病;锁骨骨折	好转	余洋	余洋	徐宏威	股骨骨折闭合复位髓内针内固定术;下肢静脉滤器置入术;下肢静脉造影;股静脉穿刺术
113	D09(创伤1)	2024-09-11	2024-09-23	3547930	贾巧妹	女	92Y	股骨颈骨折	腔隙性脑梗死;肺不张;陈旧性肋骨骨折;后天性肾囊肿;肾积水伴肾结石;肝回声不均;下肢深静脉血栓形成;二尖瓣和主动脉瓣的疾患;心包积液;胆总管扩张;肾钙化;老年性心脏瓣膜病	治愈	余洋	余洋	陈春慧	人工股骨头置换术;下腔静脉滤器置入术;股静脉穿刺术
114	D09(创伤1)	2024-09-28	2024-10-09	3553703	鲍干春	男	65Y	股骨干骨折	脂肪肝;肾结石;前列腺增生;髋关节退行性病变;下肢静脉血栓形成	治愈	余洋	余洋	陈春慧	股骨骨折闭合复位钢针内固定术;股骨植骨术
115	D09(创伤1)	2024-10-05	2024-10-12	3554477	戴瑞力	男	60Y	踝关节骨折	跖骨骨折;肺诊断性影像异常;支气管扩张(症);肺钙化;肝囊肿;肾结石;后天性肾囊肿;前列腺增生;下肢静脉血栓形成;脂肪肝;老年性心脏病;楔状骨骨折(足);前列腺结石	治愈	周一飞	周一飞	翁摄稷	踝关节骨折切开复位钢板内固定术;骨移植术;关节软骨修复术
116	D09(创伤1)	2024-11-16	2024-11-19	3570002	戴显银	男	53Y	跖骨骨折	头皮裂伤;肾结石;下肢静脉肌间血栓形成	好转	余洋	余洋	陈春慧
117	D09(创伤1)	2024-11-10	2024-11-21	3570808	金可昆	男	57Y	开放性尺骨桡骨远端骨折	肱骨干骨折;肘关节脱位;腕关节脱位;尺骨茎突骨折;肱骨外髁骨折;尺骨冠突骨折;下肢静脉肌间血栓形成;肝诊断性影像异常;胆囊息肉;后天性肾囊肿	治愈	余洋	余洋	陈春慧	桡骨和尺骨开放性骨折部位的清创术;肱骨骨折闭合复位螺钉内固定术;肌腱、血管、神经探查术;桡骨骨折切开复位钢针内固定术;肱骨人工骨植骨术;桡骨外固定术;肘关节韧带修补术;关节软骨修复术;手部肌肉或筋膜缝合术
118	D10(创伤2)	2023-12-23	2024-01-06	3467527	吴玉领	男	61Y	开放性胫腓骨干骨折	骨和关节软骨良性肿瘤;下肢静脉血栓形成;脂肪肝;前列腺增生;前列腺结石	好转	黄俊武	余贤斌	郑文浩	胫骨骨折切开复位钢板内固定术;腓骨骨折闭合复位钢板内固定术;外固定架固定
119	D10(创伤2)	2023-12-30	2024-01-06	3467777	盛月媚	女	71Y	腓骨骨折	桡骨远端骨折;下肢静脉血栓形成;泌尿道感染;心功能不全	好转	黄俊武	余贤斌	郑文浩	腓骨骨折切开复位钢板内固定术;关节软骨修复术
120	D10(创伤2)	2023-12-29	2024-01-10	3469580	李光清	男	47Y	踝关节骨折	胫腓骨下端骨折;下肢静脉血栓形成	治愈	黄义星	罗鹏	罗鹏	踝关节骨折切开复位钢板内固定术;腓骨骨折切开复位钢板内固定术;胫骨骨折切开复位螺钉内固定术
121	D10(创伤2)	2024-01-06	2024-01-14	3471629	朱美英	女	76Y	股骨颈骨折	心功能不全;主动脉钙化;高血压;下肢静脉血栓形成;室间隔肥大;主动脉(瓣)关闭不全;二尖瓣反流;肺动脉高压;肺的其他疾患;胸膜肥厚;主动脉硬化;髋关节积液	治愈	陈华	孙辽军	陈春慧	全髋关节置换;关节滑膜切除术;髋轴面，陶瓷与陶瓷
122	D10(创伤2)	2024-01-07	2024-01-16	3472550	李莲贞	女	73Y	股骨粗隆间骨折	肋骨多处骨折;帕金森病;肾盂积水，其他的;心功能不全;下肢静脉血栓形成	好转	黄俊武	余贤斌	郑文浩	股骨骨折闭合复位髓内针内固定术;股骨颈/股骨转子间骨折手法整复术
123	D10(创伤2)	2024-01-16	2024-01-23	3476743	温兴顺	男	41Y	股骨干骨折	下肢深静脉血栓形成;前列腺结石	治愈	黄义星	罗鹏	罗鹏	股骨骨折闭合复位髓内针内固定术;股静脉穿刺术;下腔静脉滤器置入术
124	D10(创伤2)	2024-01-22	2024-02-10	3479409	刘贵魁	男	85Y	股骨粗隆间骨折	高血压;下肢静脉血栓形成;心房过早除极;心功能不全	好转	黄俊武	余贤斌	郑文浩	股骨骨折闭合复位髓内针内固定术;股骨颈/股骨转子间骨折手法整复术
125	D10(创伤2)	2024-02-07	2024-02-24	3480593	张芸芸	女	82Y	股骨粗隆间骨折	肺部感染;高血压;下肢深静脉血栓形成;颈动脉硬化;慢性肾功能不全;老年性心脏病;心房过早除极;窦性心动过速	好转	石成弟	方文来	方文来	股骨骨折切开复位钢针内固定术;股骨颈/股骨转子间骨折手法整复术
126	D10(创伤2)	2024-02-21	2024-03-04	3481841	陈知花	女	72Y	手术后切口感染	胫骨骨折;高血压;下肢静脉血栓形成	治愈	黄义星	黄义星	卢迪
127	D10(创伤2)	2024-03-10	2024-03-13	3483737	杨林弟	女	86Y	股骨粗隆间骨折	下肢静脉血栓形成;肾积水伴肾结石;后天性肾囊肿	好转	黄俊武	余贤斌	郑文浩	股骨骨折闭合复位髓内针内固定术
128	D10(创伤2)	2024-03-04	2024-03-17	3484573	郑文光	男	80Y	股骨干骨折	高血压;2型糖尿病;肺部感染;下肢静脉肌间血栓形成;后天性肾囊肿;人工髋关节	好转	黄俊武	余贤斌	郑文浩	股骨骨折切开复位钢板内固定术;股骨植骨术
129	D10(创伤2)	2024-03-16	2024-03-19	3485004	林双兰	女	74Y	肱骨髁间骨折	胆囊结石;脑萎缩;高血压;2型糖尿病;下腔静脉血栓形成	治愈	黄义星	黄义星	卢迪
130	D10(创伤2)	2024-03-16	2024-03-25	3486512	朱岩喜	男	88Y	股骨粗隆间骨折	前列腺增生;下肢静脉血栓形成;主动脉(瓣)关闭不全;二尖瓣反流;心功能不全	治愈	陈华	孙辽军	陈春慧	股骨骨折闭合复位钢针内固定术
131	D10(创伤2)	2024-03-14	2024-03-25	3486574	项公花	女	73Y	股骨颈骨折	下肢深静脉血栓形成;肝囊肿;后天性肾囊肿;肺的其他疾患;肺间质纤维化;主动脉硬化	治愈	陈华	陈华	陈春慧	全髋关节置换;髋轴面，陶瓷与陶瓷
132	D10(创伤2)	2024-03-28	2024-04-02	3488865	李光清	男	47Y	取除骨折内固定装置	踝关节骨折;胫腓关节脱位;腓骨骨折;脂肪肝;肺的其他疾患;髂外静脉血栓形成;下肢静脉血栓形成;胸膜肥厚	其他	黄义星	黄义星	卢迪	踝关节内固定装置去除术;下肢静脉滤器置入术;股静脉穿刺术
133	D10(创伤2)	2024-04-01	2024-04-06	3489929	应王翠	女	95Y	肱骨外科颈骨折	肺炎;下肢动脉粥样硬化;下肢静脉血栓形成;高血压;高脂血症;后天性肾囊肿;脂肪肝	治愈	陈龙	应晓洲	应晓洲	肱骨骨折切开复位钢板内固定术;肩袖修补术
134	D10(创伤2)	2024-03-28	2024-04-14	3492315	季乾书	男	69Y	髋臼骨折	髂骨骨折;骨盆骨折;后天性肾囊肿;肺部感染;胸腔积液;肋骨骨折;下肢静脉血栓形成;大隐静脉曲张	好转	黄义星	黄义星	卢迪	髂动脉栓塞术;髂内动脉插管术
135	D10(创伤2)	2024-04-15	2024-04-22	3495029	杨阿玉	女	72Y	股骨粗隆间骨折	肺部感染;心功能不全;下肢动脉粥样硬化;下肢静脉血栓形成;异位肾	好转	黄俊武	余贤斌	郑文浩	股骨骨折闭合复位髓内针内固定术;股骨颈/股骨转子间骨折手法整复术
136	D10(创伤2)	2024-04-02	2024-04-26	3496446	郑荣国	男	57Y	创伤性脾破裂	开放性胫骨下端骨折;腓骨骨折;下肢皮肤撕裂伤;下肢静脉血栓形成;外踝骨折;肺部感染;胸腔积液;腰椎骨折;肋骨骨折;肺挫伤;失血性休克;脾损伤;腹腔积血;肾裂伤;胰腺损伤;开放性足损伤	治愈	黄义星	黄义星	卢迪	踝关节骨折切开复位钢板内固定术;全脾切除术;皮瓣修整术;创面封闭式负压引流术（VSD);下肢静脉滤器置入术;单侧肾切除术;股静脉穿刺术;腹腔冲洗检查;小腿截断术;胫骨外固定术;皮肤缝合术;创面封闭式负压引流术（VSD)
137	D10(创伤2)	2024-04-13	2024-04-29	3497385	白圻水	男	69Y	骨盆骨折	高血压;肺气肿;肺的其他疾患;主动脉钙化;肋骨多处骨折;前列腺钙化灶;老年性心脏病;下肢动脉粥样硬化;下肢深静脉血栓形成	好转	石成弟	石成弟	郑文浩	骨盆骨折切开复位钢板内固定术;股静脉穿刺术;下肢静脉滤器置入术;下肢静脉造影;下腔静脉滤器取出术;关节软骨修复术
138	D10(创伤2)	2024-04-10	2024-04-30	3497702	林贤龙	男	61Y	骨折不连接\[假关节\]	软组织感染;手术后恢复期;脂肪肝;后天性肾囊肿;慢性乙型病毒性肝炎;下肢静脉血栓形成	好转	黄义星	黄义星	陈春慧	胫骨植骨术;髂骨切除术用作移植物;胫骨内固定装置去除术
139	D10(创伤2)	2024-04-23	2024-04-30	3497835	潘春妹	女	90Y	股骨颈骨折	高血压;2型糖尿病;贫血;肾功能不全;肾结石;脂肪肝;下肢静脉曲张;下肢静脉血栓形成;胸腔积液;孤立性肺结节;肋骨多处骨折	治愈				人工股骨头置换术;髋轴面，陶瓷与金属
140	D11(创伤3)	2024-01-06	2024-01-13	3469753	徐啟妹	男	75Y	锁骨骨折	高血压;腔隙性脑梗死;老年性脑萎缩;肺诊断性影像异常;后天性肾囊肿;肾结石;下肢动脉粥样硬化;前列腺钙化灶;下肢静脉肌间血栓形成	治愈	陈龙	应晓洲	应晓洲
141	D11(创伤3)	2024-01-13	2024-01-19	3474103	白金翠	女	88Y	股骨颈骨折	高血压;2型糖尿病;肺诊断性影像异常;主动脉钙化;肝囊肿;胆囊结石;心功能不全;后天性肾囊肿;下肢静脉肌间血栓形成;室间隔肥大;退行性主动脉瓣疾患;主动脉瓣关闭不全;二尖瓣反流;肾钙化	治愈	余洋	郑亦静	郑亦静	髋关节部分置换;髋轴面，陶瓷与聚乙烯
142	D11(创伤3)	2024-01-10	2024-01-21	3475053	周常成	男	56Y	Pilon骨折	腓骨骨折累及踝关节;心功能不全;颅骨骨折;下肢深静脉血栓形成;慢性乙型病毒性肝炎;肝囊肿;胆囊结石;前列腺结石;下肢静脉肌间血栓形成	治愈	水小龙	郑亦静	郑亦静	胫骨骨折切开复位钢板内固定术;关节软骨修复术;腓骨骨折切开复位螺钉内固定术;胫骨人工骨植骨术;下腔静脉滤器置入术;下肢静脉造影
143	D11(创伤3)	2024-02-17	2024-02-27	3480983	董直员	男	51Y	股骨粗隆间骨折	大腿软组织异物残留;肝血管瘤;下肢静脉肌间血栓形成	治愈	潘骏	潘骏	金海东	股骨骨折闭合复位髓内针内固定术
144	D11(创伤3)	2024-02-26	2024-03-06	3482180	戚苹妹	女	58Y	股骨颈骨折	高血压;抑郁发作;下肢静脉肌间血栓形成;下肢静脉曲张;胆囊息肉;肺部感染;肺大疱	治愈	洪建军	卢晓郎	卢晓郎	股骨骨折闭合复位螺钉内固定术;股骨颈/股骨转子间骨折手法整复术
145	D11(创伤3)	2024-02-25	2024-03-08	3482570	郑婷婷	女	34Y	胫骨上端骨折	静脉血栓形成;骨折术后恢复期;胆囊结石;肺间质纤维化	治愈	王振文	水小龙	徐宏威	胫骨骨折切开复位钢板内固定术;胫骨植骨术
146	D11(创伤3)	2024-03-07	2024-03-16	3484181	朱进旺	男	97Y	股骨粗隆间骨折	肺诊断性影像异常;肝回声不均;前列腺增生;下肢动脉粥样硬化;下肢静脉肌间血栓形成;腰椎退行性病变;胸椎退行性病变	治愈	王振文	水小龙	徐宏威	股骨骨折闭合复位髓内针内固定术
147	D11(创伤3)	2024-03-19	2024-03-27	3487286	朱春竹	女	65Y	双踝骨折	在踝和足水平的韧带破裂;高血压;下肢静脉肌间血栓形成;冠状动脉粥样硬化;多发性肝囊肿;脂肪肝;胆囊息肉;肾超声检查异常;肾盂积水;下肢动脉粥样硬化	治愈	洪建军	卢晓郎	卢晓郎	踝关节骨折切开复位钢板内固定术;踝关节的其他修补术;腓骨人工骨植骨术
148	D11(创伤3)	2024-03-20	2024-03-29	3487679	胡国兴	男	90Y	股骨粗隆间骨折	肺部感染;胸腔积液;心包积液;肾挛缩;后天性肾囊肿;前列腺增生;下肢静脉肌间血栓形成;冠状动脉粥样硬化性心脏病;心房颤动;心功能不全;肺不张;主动脉钙化	治愈	洪建军	卢晓郎	卢晓郎	股骨骨折闭合复位髓内针内固定术
149	D11(创伤3)	2024-03-26	2024-03-29	3487683	邢松花	女	81Y	股骨粗隆间骨折	高血压;2型糖尿病;肺部感染;脑卒中后遗症;冠状动脉粥样硬化;下肢静脉肌间血栓形成;陈旧性肋骨骨折;脂肪肝;后天性肾囊肿;由于其他和未特指原因而使病人决定不进行操作;主动脉钙化	好转	洪建军	卢晓郎	卢晓郎
150	D11(创伤3)	2024-03-20	2024-04-02	3488774	蔡正亮	男	50Y	股骨粗隆间骨折	股骨粗隆下骨折;多处皮肤浅表挫伤;胸腔积液;下肢静脉肌间血栓形成;头部的损伤	治愈	洪建军	卢晓郎	卢晓郎	股骨骨折闭合复位髓内针内固定术;股骨人工骨植骨术
151	D11(创伤3)	2024-03-26	2024-04-05	3489686	陈宗才	男	62Y	开放性多发性足骨折	足部套脱伤;踝和足肌肉和肌腱损伤;肝回声不均;后天性肾囊肿;前列腺结石;下肢静脉肌间血栓形成	治愈	王振文	余洋	徐宏威	经足截断术;皮肤和皮下坏死组织切除清创术;创面封闭式负压引流术（VSD);肌腱、血管、神经探查术
152	D11(创伤3)	2024-03-31	2024-04-06	3489946	潘教楚	男	78Y	股骨粗隆下骨折	下肢深静脉血栓形成;腰椎退行性病变;心功能不全	治愈	潘骏	潘骏	金海东	股骨骨折闭合复位髓内针内固定术;下腔静脉滤器置入术;下肢静脉造影
153	D11(创伤3)	2024-04-01	2024-04-20	3494328	白希印	男	72Y	髋臼骨折	耻骨骨折;骶骨骨折;腹腔积液;多发性脑梗死;老年性脑萎缩;颈内动脉斑块;特发性肺纤维化;肺大疱;冠状动脉粥样硬化;肝囊肿;前列腺增生;下肢静脉肌间血栓形成;包绕性睾丸鞘膜积液;腰椎骨折;主动脉钙化	治愈	洪建军	卢晓郎	卢晓郎	骨盆骨折切开复位螺钉内固定术;盆骨外固定术;椎弓根钉内固定术
154	D11(创伤3)	2024-04-13	2024-04-22	3495171	胡杨花	女	91Y	股骨粗隆间骨折	后天性肾囊肿;下肢静脉肌间血栓形成;肾积水伴肾结石	治愈	王振文	水小龙	徐宏威	股骨骨折闭合复位髓内针内固定术
155	D11(创伤3)	2024-04-09	2024-04-25	3496195	张小妹	女	56Y	肱骨下端骨折	尺骨鹰嘴骨折;高血压;下肢静脉肌间血栓形成;特发性肺纤维化;脂肪肝;肾结石	治愈	洪建军	张秀孟	张秀孟	肱骨骨折切开复位钢板内固定术;关节软骨修复术;肱骨植骨术
156	D11(创伤3)	2024-04-13	2024-04-30	3497581	陈启标	男	54Y	股骨髁间骨折	股骨干骨折;膝关节内侧副韧带损伤;下肢深静脉血栓形成;下肢静脉肌间血栓形成;下肢动脉粥样硬化;肺诊断性影像异常;肺部感染;肾包膜下积液	治愈	洪建军	张秀孟	张秀孟	下腔静脉滤器置入术;肾静脉造影;下腔静脉滤器取出术;股骨骨折切开复位钢板内固定术;关节软骨修复术;股骨人工骨植骨术;副韧带修补术;下肢静脉造影
157	D11(创伤3)	2024-04-14	2024-04-30	3497590	刘雪山	男	28Y	股骨干骨折	开放性髌骨骨折;下肢静脉肌间血栓形成;隐睾	治愈	洪建军	张秀孟	张秀孟	股骨骨折闭合复位髓内针内固定术;髌骨骨折切开复位螺钉内固定术;膝关节的其他修补术;股四头肌缝合术;胫骨结节牵引
158	D11(创伤3)	2024-04-14	2024-05-04	3498512	林文龙	男	68Y	耻骨骨折	肺动脉栓塞;骶骨骨折;眶骨骨折;骶髂关节脱位;肾结石;后天性肾囊肿;胸腔积液;下肢静脉肌间血栓形成;肺气肿合并肺大泡;老年性心脏瓣膜病	治愈	王振文	水小龙	汪吉棋	骨盆骨折切开复位钢板内固定术;骶髂关节融合术
159	D12(手外)	2024-01-09	2024-01-17	3473434	李牡丹	女	69Y	股骨颈骨折	下肢静脉血栓形成;胸腔积液;肝回声不均;胆囊息肉;胆总管扩张;肺部阴影	治愈	孔建中	陈墨川	胡炜	股骨骨折闭合复位螺钉内固定术
160	D12(手外)	2024-01-15	2024-01-21	3475193	蔡建发	男	52Y	肩锁关节脱位	脂肪肝;肋骨骨折;胸腔积液;前列腺结石;肺部阴影;肝钙化灶;下肢静脉血栓形成;下肢静脉曲张	治愈	虞庆	虞庆	林康	肩锁关节脱位切开复位内固定术;肩锁关节修补术
161	D12(手外)	2023-12-11	2024-01-22	3475697	江爱味	女	57Y	锁骨骨折	跟骨骨折;腓骨骨折;四根以上肋骨骨折不伴第一肋骨骨折;下肢静脉血栓形成;额部血肿;眼睑血肿;创伤性湿肺;多发性脑梗死;老年性脑萎缩;后天性肾囊肿;孤立性肺结节	治愈	虞庆	虞庆	王杰克	跟骨骨折切开复位钢针内固定术;皮肤和皮下坏死组织切除清创术;腓肠神经吻合术;下肢肌腱缝合术;胫神经缝合术;胫动脉缝合术;创面封闭式负压引流术（VSD);锁骨骨折切开复位钢板内固定术;创面封闭式负压引流术（VSD);皮肤和皮下组织非切除性清创;下腔静脉滤器置入术
162	D12(手外)	2024-01-09	2024-01-23	3476744	陈礼真	男	73Y	髂骨骨折	耻骨骨折;坐骨骨折;肺部感染;创伤性胸腔积液;心功能不全;前列腺增生;静脉血栓形成;肋骨骨折	好转	翁益民	翁益民	王特	髂骨骨折切开复位钢板内固定术
163	D12(手外)	2024-01-12	2024-01-31	3478062	金彩花	女	70Y	小腿挤压伤	趾骨骨折;开放性足损伤;升主动脉扩张;室间隔肥大;二尖瓣及主动脉瓣关闭不全;退行性主动脉瓣疾患;肝回声不均;肝囊肿;胆囊结石;肾结石;膝关节退行性病变;下肢静脉血栓形成;肋骨骨折;肱骨骨折	治愈	虞庆	虞庆	林康	截断残端的修复术;经胫骨和腓骨的小腿离断术;带蒂皮瓣移植术;带蒂皮瓣移植术;创面封闭式负压引流术（VSD);创面封闭式负压引流术（VSD);膝关节滑膜切除术
164	D12(手外)	2024-02-21	2024-03-06	3482331	胡春英	女	77Y	股骨颈骨折	坠积性肺炎;胆囊结石;后天性肾囊肿;下肢静脉血栓形成;心脏和冠状循环诊断性影像检查的异常所见;高血压;肺部阴影	好转	陈华	孙辽军	陈春慧	全髋关节置换;髋轴面，陶瓷与陶瓷
165	D12(手外)	2024-05-27	2024-06-05	3508285	李芸雪	女	52Y	锁骨骨折	肋骨骨折;下肢动脉血栓形成;多处挫伤;脂肪肝	治愈	王鉴顺	王鉴顺	白炳力	锁骨骨折切开复位钢板内固定术;锁骨人工骨植骨术
166	D12(手外)	2024-07-03	2024-07-15	3521674	李忠杰	男	92Y	创伤后伤口感染	脓毒血症;手部指伸肌腱损伤;指间关节脱位;头皮血肿;肋骨骨折;心功能不全;肾功能不全;肺肿物;胸腔积液;老年性脑萎缩;肝囊肿;后天性肾囊肿;脊柱侧弯;贫血;低蛋白血症;低钾血症;低钙血症;老年性痴呆;下肢静脉血栓形成	治愈	李志杰	吴志鹏	王珑	皮肤和皮下坏死组织切除清创术;皮肤缝合术;手肌腱、血管、神经探查术;伸指肌腱缝合术;伤口、感染或烧伤的非切除性清创术;缝线去除
167	D12(手外)	2024-07-13	2024-09-11	3543802	陈杨粉	女	57Y	截断术残端的感染	骨盆骨折;锁骨骨折;肩锁关节脱位;胸骨骨折;肋骨多处骨折;创伤性血气胸;创伤性胸腔积液;急性失血性贫血;下肢深静脉血栓形成;瘢痕挛缩;肺部感染;低蛋白血症;心功能不全;下肢深静脉血栓形成;上睑下垂;玻璃体混浊;肺挫伤	治愈	陈星隆	李士	蔡海丰	创面封闭式负压引流术（VSD);创面封闭式负压引流术（VSD);膝关节离断术;皮肤和皮下坏死组织切除清创术;呼吸机治疗[大于等于96小时];锁骨下静脉穿刺中心静脉置管术;支气管镜下诊断性支气管肺泡灌洗[BAL];皮肤和皮下坏死组织切除清创术
168	D13(手外)	2024-01-09	2024-01-14	3471532	刘开均	男	49Y	骨折不连接\[假关节\]	拇指骨折;乙型肝炎小三阳;胆囊息肉;后天性肾囊肿;心功能不全;下肢静脉肌间血栓形成	治愈	陈星隆	陈一衡	蔡海丰	指骨植骨术;髂骨切除术用作移植物
169	D13(手外)	2024-04-05	2024-04-13	3492030	林珠香	女	65Y	尺骨茎突骨折伴桡骨远端骨折	脂肪肝;肝囊肿;肺的其他疾患;特发性肺纤维化;主动脉钙化;左室扩大;心功能不全;下肢静脉血栓形成;主动脉(瓣)关闭不全	治愈	陈星隆	陈星隆	蔡海丰	桡骨骨折切开复位钢板内固定术
170	D13呼吸内科一	2024-07-16	2024-07-23	3524429	潘锦珍	女	74Y	肺部感染	支气管扩张(症);肺占位性病变;脑占位性病变;肝囊肿;肝病;胆囊息肉;下肢动脉粥样硬化;下肢静脉肌间血栓形成;跟骨骨折	好转	吴立琴	吴立琴	施盛乔
171	D13呼吸内科一	2024-07-20	2024-08-24	3536567	高自良	男	55Y	髋臼骨折	髂骨骨折;耻骨骨折;髂动脉损伤;急性肺血栓栓塞症;肺动脉高压重度;下肢深静脉血栓形成;下肢静脉血栓形成;腰椎骨折L2;肋骨多处骨折;气胸;颈椎退行性病变;腰椎退行性病变;颈椎间盘突出;脂肪肝	好转	夏晓东	夏晓东	夏晓东	骨盆骨折切开复位钢板内固定术;下腔静脉滤器置入术;下肢静脉造影;髂动脉栓塞术;髂动脉造影;皮肤和皮下组织切开术伴异物或装置去除
172	D13呼吸内科一	2024-12-04	2024-12-10	3578160	林连国	男	70Y	肺动脉栓塞	肺部感染;胸腔积液;肺气肿;肺肿物;下肢动脉粥样硬化;下肢静脉血栓形成;缺铁性贫血;肋骨多处骨折;腰椎骨折	好转	翁海霞	吴立琴	李慧莹
173	D14(脊柱)	2024-01-02	2024-01-08	3468690	连珠香	女	71Y	病理性骨折，不可归类在他处者	高血压;糖尿病性前期肾病;肺部感染;泌尿道感染;胸腔积液;肋骨骨折;下肢静脉血栓形成	好转	徐晖	徐晖	朱思品	椎骨活组织检查
174	D14(脊柱)	2023-12-20	2024-01-08	3468718	孙静	女	63Y	脊柱继发恶性肿瘤	肿瘤性病理性骨折;胸椎椎管狭窄;肺占位性病变;乳腺恶性肿瘤;多发性肝囊肿;肝占位性病变;下肢动脉粥样硬化;下肢静脉血栓形成;胸腔积液	治愈	倪文飞	林仲可	万峻莱	胸椎病损切除术;胸椎椎板切除减压术;椎骨内固定术
175	D14(脊柱)	2023-12-30	2024-01-11	3470253	杨典恭	男	81Y	腰椎骨折	骨质疏松，其他的;陈旧性腰椎骨折;腰椎间盘突出;腰椎退行性病变;胸椎退行性病变;肺间质纤维化;胸腔积液;高血压;脂肪肝;肝囊肿;后天性肾囊肿;椎管内囊肿;前列腺结石;下肢静脉血栓形成;腹主动脉粥样硬化;前列腺增生;髂动脉硬化;腹主动脉狭窄;髂动脉狭窄	治愈	倪文飞	林仲可	万峻莱	腰椎骨折球囊扩张成形术
176	D14(脊柱)	2024-01-08	2024-01-14	3471586	周秀珠	女	69Y	病理性骨折，不可归类在他处者	多发性骨髓瘤;腰骶椎间盘突出;腰骶椎间盘变性;特发性(原发性)高血压;脂肪肝;肝囊肿;下肢静脉血栓形成;手术后状态，其他特指的	好转	徐晖	徐晖	朱思品	经皮穿刺脊柱后凸成形术;椎骨活组织检查
177	D14(脊柱)	2024-01-09	2024-01-16	3472605	吴林妹	女	85Y	骨质疏松伴有病理性骨折	腰椎术后;脊柱侧弯;腰椎前移;脊椎退行性病变;腰骶椎间盘突出;肝回声不均;下肢静脉血栓形成;主动脉钙化;特发性(原发性)高血压	治愈	倪文飞	林仲可	万峻莱	胸椎骨折球囊扩张成形术
178	D14(脊柱)	2024-01-13	2024-01-17	3473268	郑巧芬	女	69Y	骨质疏松伴有病理性骨折	胸椎退行性病变;腰椎退行性病变;腰椎间盘突出;肝回声不均;下肢静脉血栓形成;后天性肾囊肿	治愈	倪文飞	林仲可	万峻莱	腰椎骨折球囊扩张成形术
179	D14(脊柱)	2023-12-30	2024-01-20	3474748	刘新地	男	55Y	腰椎和骨盆多处骨折	胸椎多处骨折;腰部脊髓损伤;耻骨联合脱位;耻骨骨折;骶骨骨折;胸部脊髓损伤;创伤性蛛网膜下腔出血;腰骶椎间盘突出;颈部挫伤;下肢静脉血栓形成;胸腔积液;上颌窦炎	好转	倪文飞	林仲可	万峻莱	腰椎骨折切开复位内固定术;腰椎椎板切除减压术;骨盆骨折闭合复位内固定术
180	D14(脊柱)	2023-12-29	2024-02-18	3480016	程占士	男	52Y	胸椎多处骨折	胸部脊髓损伤;创伤性截瘫;肋骨骨折;创伤性湿肺;创伤性气胸;多发性肝囊肿;胸主动脉夹层;多发性腰椎骨折;下肢静脉血栓形成;特发性肾积水	治愈	倪文飞	林仲可	万峻莱	胸椎骨折切开复位内固定术;下腔静脉滤器置入术;下肢静脉造影;胸主动脉覆膜支架腔内隔绝术;主动脉造影术;胸椎间盘切除伴椎板切除术;胸椎融合术，后入路;2-3个椎骨融合或再融合;金属脊椎融合物置入术
181	D14(脊柱)	2024-03-28	2024-04-03	3489184	梁亦左	男	71Y	胸椎骨折	下肢静脉血栓形成;胸椎退行性病变;腰椎退行性病变;脊柱侧弯;肺气肿;肺诊断性影像异常;肾积水伴肾结石;前列腺结石;高血压;下肢静脉曲张	治愈	徐晖	徐晖	徐晖	胸椎骨折球囊扩张成形术
182	D14(脊柱)	2024-03-30	2024-04-04	3489546	胡爱银	女	71Y	骨质疏松伴有病理性骨折	胸椎术后;胸椎退行性病变;腰椎退行性病变;哮喘;支气管扩张伴感染;糖尿病;下肢静脉肌间血栓形成;肝钙化灶;下肢动脉粥样硬化	治愈	黄其杉	田乃锋	周凯亮	胸椎骨折球囊扩张成形术
183	D14(脊柱)	2024-03-27	2024-04-06	3489181	李高奉	男	56Y	胸椎多处骨折	趾骨骨折;骨质疏松;创伤性湿肺;多发性肝囊肿;胆汁淤积症;下肢静脉血栓形成	治愈	黄其杉	田乃锋	周凯亮	胸椎骨折球囊扩张成形术
184	D14(脊柱)	2024-04-04	2024-04-10	3491222	朱景波	男	81Y	胸椎多处骨折	多发性腰椎骨折;两根肋骨骨折不伴第一肋骨骨折;下肢静脉血栓形成;骨质疏松;肺气肿;颈椎退行性病变;胸椎退行性病变;腰椎退行性病变;后天性肾囊肿;躯干脂肪瘤	治愈	徐晖	徐晖	徐晖	经皮穿刺脊柱后凸成形术
185	D14(脊柱)	2024-04-04	2024-04-10	3491239	戴碎花	女	90Y	骨质疏松伴有病理性骨折	下肢静脉血栓形成;腰椎退行性病变;肾结石;肝钙化灶;后天性肾囊肿	好转	武垚森	武垚森	武垚森	腰椎骨折球囊扩张成形术
186	D14(脊柱)	2024-04-07	2024-04-13	3492108	乔娒弟	男	84Y	胸椎骨折	腰椎骨折L1;骨质疏松;脊柱侧弯;脊椎前移;帕金森病;肝囊肿;后天性肾囊肿;前列腺增生;下肢动脉粥样硬化;静脉血栓形成;腰椎退行性病变;肺诊断性影像异常;前列腺结石	治愈	黄其杉	田乃锋	周凯亮	胸椎骨折球囊扩张成形术
187	D14(脊柱)	2024-04-08	2024-04-21	3494779	陈建林	男	62Y	多发性腰椎骨折	胸椎多处骨折;腰背部挫伤;创伤性湿肺;下肢静脉血栓形成;肋骨骨折;胸腔积液;脂肪肝;胆囊结石;后天性肾囊肿;肾结石	治愈	武垚森	武垚森	武垚森	腰椎骨折切开复位内固定术;经皮椎骨成形术
188	D14(脊柱)	2024-04-20	2024-04-25	3496266	王重根	男	81Y	胸椎多处骨折	骨质疏松;胸椎退行性病变;腰椎退行性病变;高血压;腔隙性脑梗死;下肢动脉粥样硬化;下肢静脉血栓形成;脂肪肝;肾结石	治愈	黄其杉	田乃锋	周凯亮	经皮穿刺脊柱后凸成形术
189	D14呼吸内科二/风湿免疫	2024-07-11	2024-07-20	3523136	黄英英	女	81Y	肺部感染	冠状动脉粥样硬化性心脏病;2型糖尿病;高尿酸血症;颈动脉硬化;锁骨下动脉粥样硬化;陈旧性肋骨骨折;脂肪肝;手术后状态，其他特指的;下肢静脉肌间血栓形成;上肢动脉粥样硬化;下肢动脉粥样硬化	好转	颜孙舜	颜孙舜	彭燕平
190	D14呼吸内科二/风湿免疫	2024-09-30	2024-10-09	3553676	李春叶	女	72Y	急性肺栓塞	下肢深静脉血栓形成;脓毒血症;低钾血症;2型糖尿病;高血压;骨折术后;下肢动脉粥样硬化;退行性主动脉瓣疾患;二尖瓣及三尖瓣关闭不全;肺大疱;胸腔积液;脂肪肝;胰腺萎缩	好转	翁海霞	俞丽华	葛翔挺
191	D15颈椎外科、腰椎外科	2024-01-08	2024-01-17	3473176	彭爱聪	女	73Y	骨质疏松伴有病理性骨折，其他的	胸椎骨折T7/T8;特发性(原发性)高血压;胸椎间盘突出;腰椎间盘突出;下肢静脉血栓形成	好转	毛方敏	吴爱悯	吴爱悯	胸椎骨折球囊扩张成形术;椎骨活组织检查
192	D15颈椎外科、腰椎外科	2024-01-15	2024-01-21	3475171	邹金花	女	84Y	胸椎骨折	骨质疏松，其他的;胸椎退行性病变;多发性肝囊肿;下肢静脉血栓形成;下肢动脉粥样硬化	治愈	毛方敏	吴爱悯	吴爱悯	胸椎骨折球囊扩张成形术
193	D15颈椎外科、腰椎外科	2024-01-16	2024-01-22	3475911	周曼丽	女	81Y	胸椎骨折	胸椎术后;腰椎术后;高血压;肝回声不均;肝囊肿;肾结石;窦性心律失常;下肢静脉血栓形成	治愈	林焱	武垚森	周凯亮	胸椎骨折球囊扩张成形术
194	D15颈椎外科、腰椎外科	2024-01-21	2024-01-23	3476442	张玉燕	女	66Y	腰椎骨折L1	骨质疏松，其他的;脊椎退行性病变;脂肪肝;胆囊结石;肾结石;高血压;下肢静脉血栓形成	治愈	王向阳	窦海成	陈泽新	腰椎骨折球囊扩张成形术
195	D15颈椎外科、腰椎外科	2024-02-28	2024-03-04	3481889	林月仙	女	70Y	腰椎骨折L1	骨质疏松，其他的;腰椎间盘突出;腰椎退行性病变;肝囊肿;胆囊结石;肾结石;下肢静脉血栓形成;肝回声不均	治愈	毛方敏	吴爱悯	吴爱悯	腰椎骨折球囊扩张成形术
196	D15颈椎外科、腰椎外科	2024-03-01	2024-03-05	3482055	蒋松翠	女	84Y	骨质疏松伴有病理性骨折，其他的	胸椎骨折;胸椎退行性病变;下肢静脉血栓形成;腰椎退行性病变	好转	王向阳	窦海成	陈泽新	胸椎骨折球囊扩张成形术
197	D15颈椎外科、腰椎外科	2024-02-28	2024-03-09	3482706	林炳钦	男	86Y	骨质疏松伴有病理性骨折，其他的	腰椎骨折L1;高血压;心包积液;肺大疱;胸腔积液;肺诊断性影像异常;肝囊肿;后天性肾囊肿;前列腺增生;下肢静脉肌间血栓形成;前列腺结石	好转	王向阳	窦海成	陈泽新	腰椎骨折球囊扩张成形术
198	D15颈椎外科、腰椎外科	2024-03-09	2024-03-19	3485093	杨友弟	女	74Y	腰椎骨折L4	骨质疏松，其他的;后天性肾囊肿;下肢静脉肌间血栓形成;可疑疾病和情况的观察，其他的;手术后状态，其他特指的	治愈	毛方敏	吴爱悯	吴爱悯	腰椎骨折切开复位内固定术
199	D15颈椎外科、腰椎外科	2024-03-23	2024-03-27	3487107	陈满仙	女	62Y	骨质疏松伴有病理性骨折，其他的	腰椎骨折L2;下肢静脉肌间血栓形成;椎管内蛛网膜囊肿;胆囊息肉	治愈	王向阳	窦海成	陈泽新	腰椎骨折球囊扩张成形术
200	D15颈椎外科、腰椎外科	2024-04-06	2024-04-09	3490874	贾爱莲	女	70Y	胸椎骨折	骨质疏松;特发性肺纤维化;创伤性胸腔积液;主动脉钙化;腰椎间盘突出;脂肪肝;胆囊结石;下肢静脉肌间血栓形成	治愈	毛方敏	毛方敏	万峻莱	胸椎骨折球囊扩张成形术
201	D15颈椎外科、腰椎外科	2024-04-04	2024-04-15	3492768	张兰芬	女	74Y	骨质疏松伴有病理性骨折，其他的	胸椎多处骨折;胸椎间盘突出;下肢动脉粥样硬化;下肢静脉肌间血栓形成;肝囊肿;肺诊断性影像异常	好转	王向阳	盛孙仁	朱思品	胸椎骨折切开复位内固定术;胸椎骨折球囊扩张成形术
202	D15颈椎外科、腰椎外科	2024-04-16	2024-04-24	3495960	饶菊	女	82Y	化脓性脊柱炎	腰椎压缩性骨折;马尾综合征;腰椎间盘突出;骨质疏松;胸椎退行性病变;腰椎退行性病变;腔隙性脑梗死;周围神经病;脑梗死后遗症;泌尿道感染;轻度贫血;下肢动脉粥样硬化;下肢静脉肌间血栓形成;脊髓受压	好转	林仲可	王胜	王胜
203	D15颈椎外科、腰椎外科	2024-04-15	2024-04-28	3497011	黄其雪	男	61Y	腰椎骨折L3	糖尿病不伴有并发症;下肢静脉血栓形成	好转	林焱	许聪	许聪	腰椎骨折切开复位内固定术
204	D15五官科二/神经外科二	2024-08-22	2024-09-03	3540853	余守中	男	74Y	腹壁皮肤继发恶性肿瘤	颅内恶性肿瘤;肺继发恶性肿瘤;腔隙性脑梗死;脑积水;肺诊断性影像检查的异常所见;肺气肿;陈旧性肋骨骨折;后天性肾囊肿;前列腺钙化灶;下肢动脉粥样硬化;下肢静脉血栓形成;脂肪肝;高血压;心脏肥大	好转	张弩	周辉	俞丽生	腹壁病损切除术
205	D15五官科二/神经外科二	2024-09-03	2024-10-03	3551884	郑祥钗	女	79Y	创伤性硬脑膜下血肿	创伤性硬脑膜外血肿;创伤性蛛网膜下腔出血;局灶性大脑挫裂伤;枕骨骨折;下肢静脉血栓形成;肺诊断性影像检查的异常所见;高血压;2型糖尿病	治愈	张弩	周辉	俞丽生	脑膜切开伴硬脑膜下腔血肿清除术;颅骨修补术;脑脊液漏修补术
206	D15五官科二/神经外科二	2024-09-21	2024-10-12	3554563	金育龙	男	65Y	颅骨缺损修补	顶骨骨折;颞骨骨折;上颌窦炎;肺部感染;肺诊断性影像检查的异常所见;肺大疱;肾结石;慢性胃炎;消化道诊断性影像异常;髋关节积液;下肢静脉血栓形成	其他	张弩	周辉	蔡铭	颅骨修补术
207	D15五官科二/神经外科二	2024-10-15	2024-10-28	3561153	金育龙	男	65Y	肺部感染	脑出血后遗症;颞骨骨折;上颌窦炎;肺诊断性影像检查的异常所见;肺大疱;慢性胃炎;髋关节积液;下肢静脉肌间血栓形成;肝回声不均;髋臼骨折;胆囊结石;肾结石;膀胱结石;消化道诊断性影像异常;后天性颅骨缺损;脑术后	好转	张弩	周辉	卢相琦
208	F02急诊创伤	2024-01-06	2024-01-15	3472222	吴继爱	男	64Y	创伤性蛛网膜下腔出血	创伤性硬脑膜下积液;颈部脊髓损伤;多处挫伤;颈椎间盘突出;颈椎退行性病变;后纵韧带骨化;胸椎退行性病变;胸椎椎管狭窄;下肢静脉血栓形成;面部软组织挫伤;四根以上肋骨骨折不伴第一肋骨骨折;胸腔积液;肺挫伤	好转	吴伟军	朱烈烈	朱烈烈
209	F02急诊创伤	2024-02-17	2024-02-29	3481300	张凤弟	女	85Y	脑挫伤	肋骨骨折;骨盆骨折;下肢静脉血栓形成	好转	林露阳	林露阳	项洪武
210	F02急诊创伤	2024-04-15	2024-04-29	3497433	肖彩仙	女	62Y	肺挫伤	创伤性气胸;锁骨骨折;肋骨骨折;胸椎骨折;腰椎骨折;面部软组织挫伤;高血压;眼睑裂伤;泪小管断裂;下肢深静脉血栓形成;下肢静脉血栓形成;I型呼吸衰竭	好转	林露阳	项洪武	项洪武	泪小管吻合术;鼻泪管插管术;鼻泪管探通术;内眦成形术;锁骨骨折切开复位钢板内固定术;锁骨人工骨植骨术;下腔静脉滤器置入术;下肢静脉造影
211	F02急诊创伤	2024-04-29	2024-05-05	3498923	徐显超	男	85Y	肺挫伤	肩胛骨骨折;创伤性气胸;肋骨多处骨折;创伤性皮下气肿;肺气肿;脑萎缩;脑缺血灶;甲状腺肿物;肾占位性病变;单侧腹股沟疝;后天性肾囊肿;肾结石;下肢静脉血栓形成;主动脉钙化;主动脉瓣钙化;二尖瓣钙化;冠状动脉粥样硬化;前列腺增生;累及泌尿系统其他和未特指的症状和体征	好转	林露阳	林露阳	项洪武
212	F02急诊创伤	2024-05-14	2024-05-19	3502971	陈加申	男	86Y	颈部脊髓其他和未特指的损伤	颈椎椎弓骨折;颈椎棘突骨折;颈椎间盘突出;颈椎椎管狭窄;颈椎退行性病变;腰椎退行性病变;腰椎间盘突出;硬脑膜下积液;胸腔积液;陈旧性肋骨骨折;食管裂孔疝;孤立性肺结节;脑萎缩;主动脉钙化;下肢静脉肌间血栓形成;腔隙性脑梗死;冠状动脉粥样硬化;棘上韧带损伤;肺挫伤	治愈	林露阳	林露阳	项洪武
213	F02急诊创伤	2024-05-15	2024-06-01	3506882	章学兴	男	74Y	脑震荡	肩胛骨骨折;冈上肌肌腱损伤;创伤性胸腔积液;肋骨多处骨折;创伤性气胸;肺挫伤;头皮血肿;创伤后硬脑膜下积液;陈旧性腰椎骨折;下肢静脉肌间血栓形成	治愈	林露阳	林露阳	项洪武	胸腔闭式引流术
214	F02急诊创伤	2024-05-26	2024-06-05	3508335	李宝兰	女	81Y	脑挫伤	创伤性蛛网膜下出血;肋骨多处骨折;心包积液;胸腔积液;盆腔积液;多处挫伤;甲状腺结节;下肢动脉粥样硬化;下肢静脉肌间血栓形成;胸椎退行性病变;老年性骨质疏松;痴呆;高血压2级;2型糖尿病;头皮血肿;腰椎退行性病变;肺诊断性影像异常	治愈	林露阳	林露阳	项洪武
215	F02急诊创伤	2024-07-04	2024-07-15	3521707	林和娒	男	72Y	肋骨多处骨折	肺气肿;胸腔积液;心包积液;头皮血肿;下肢动脉粥样硬化;下肢静脉血栓形成;慢性咽炎;后天性肾囊肿;前列腺增生;胸椎退行性病变;腰椎间盘突出;胸椎骨折;胸骨骨折;腰骶棘突骨折;创伤性湿肺	治愈	林露阳	项洪武	项洪武
216	F02急诊创伤	2024-08-06	2024-08-24	3536827	潘成锦	男	81Y	腰椎骨折L2	颞叶出血;创伤性髂腰肌血肿;创伤性腹膜后血肿;下肢静脉血栓形成;下肢动脉粥样硬化;肾结石;心房颤动;肺动脉高压;帕金森病;特发性(原发性)高血压;脚气病;痛风;阿尔茨海默病	好转	林露阳	项洪武	项洪武	腰椎骨折球囊扩张成形术
217	F02急诊创伤	2024-09-28	2024-10-16	3556426	邵国娇	女	66Y	髂外静脉血栓形成	丘脑出血;肋骨骨折;胸腔积液;下肢深静脉血栓形成;高血压;动脉粥样硬化;主动脉钙化	好转	林露阳	项洪武	项洪武	髂静脉造影;股静脉穿刺术;下腔静脉滤器置入术
218	F02急诊创伤	2024-10-10	2024-10-22	3558822	李宏焱	男	68Y	脑挫伤	创伤性硬膜下出血;创伤性蛛网膜下腔出血;颞骨骨折;顶骨骨折;肋骨骨折;创伤性胸腔积液;腹壁挫伤;耻骨骨折;骶骨骨折;耳损伤;下肢静脉血栓形成;多处挫伤;肺气肿;下肢动脉粥样硬化;腔隙性脑梗死	治愈	林露阳	项洪武	项洪武
219	F02急诊创伤	2024-09-25	2024-10-23	3559355	李振辉	男	47Y	胸椎多处骨折	多发性腰椎骨折;锁骨骨折;脊髓损伤;肱骨骨折;跟骨骨折;肩胛骨骨折;股骨髁上骨折;肋骨骨折;截瘫;创伤性胸腔积液;失血性休克;肺部感染;多处挫伤;多发性小脑挫裂伤;足舟骨骨折;踝关节骨折;下肢静脉血栓形成;椎间盘突出;胸椎退行性病变;血管瘤	好转	林露阳	项洪武	项洪武	脊椎骨折切开复位内固定术;锁骨骨折切开复位钢板内固定术;肱骨骨折切开复位钢板内固定术;股骨骨折切开复位钢板内固定术;股骨人工骨植骨术;跟骨骨折切开复位钢板内固定术;肩袖修补术;呼吸机治疗[大于等于96小时];锁骨下静脉穿刺中心静脉置管术;胸腔闭式引流术
220	F02急诊创伤	2024-11-14	2024-12-21	3582607	张选峰	男	54Y	尺骨桡骨闭合性骨折	肩胛骨骨折;跖骨骨折;张力性气胸;创伤性胸腔积液;肋骨骨折;缺氧缺血性脑病;创伤性硬膜下出血;开放性脑挫伤;创伤性蛛网膜下腔出血;肺部感染;泌尿道感染;腹腔积液;肾上腺肿物;多处挫伤;桡骨骨折;指骨骨折;胫骨上端骨折;膝关节积液;下肢静脉肌间血栓形成;颈椎横突骨折	治愈	林露阳	项洪武	项洪武	肩胛骨骨折切开复位钢板内固定术;桡骨骨折切开复位钢板内固定术;尺骨骨折切开复位钢板内固定术;尺骨人工骨植骨术;趾关节融合术;趾骨人工骨植骨术;趾骨骨折切开复位钢板内固定术
221	F03观察病房	2024-01-14	2024-02-02	3478485	上官彩弟	女	78Y	泌尿道感染	尿潴留;肾盂积水，其他的;肺部感染;2型糖尿病;高血压2级;混合型阿尔茨海默病性痴呆伴幻觉妄想状态;胆囊结石;肾结石;后天性肾囊肿;陈旧性腰椎骨折;下肢静脉血栓形成;颈动脉硬化;下肢动脉粥样硬化	好转	陈大庆	齐艳红	曾霜
222	F03观察病房	2024-08-13	2024-08-21	3535618	范秀娒	女	88Y	泌尿道感染	肺部感染;骨质疏松伴有病理性骨折;静脉血栓形成;一度烫伤;特发性(原发性)高血压;心脏射频消融术后;脊椎退行性病变;肺恶性肿瘤个人史;骨折术后;股骨颈骨折;后天性肾囊肿;结膜炎;晶状体疾患;胸椎压缩性骨折	好转	王志翊	胡公义	周小明
223	F04脑外	2023-12-06	2024-01-10	3469509	李丽萍	女	61Y	颞叶恶性肿瘤	胸腔积液;肋骨多处骨折;多发性肝囊肿;下肢动脉粥样硬化;下肢静脉血栓形成	好转	张弩	周辉	卢相琦	大脑半球病损切除术;脑脊液漏修补术
224	F04脑外	2024-01-10	2024-01-16	3472572	李丽萍	女	61Y	额颞叶恶性肿瘤	颅内出血(非创伤性);肺部感染;胸腔积液;肋骨多处骨折;多发性肝囊肿;下肢动脉粥样硬化;下肢静脉血栓形成	好转	张弩	周辉	卢相琦
225	F04脑外	2023-12-16	2024-02-09	3479254	钱林钦	男	68Y	弥散性大脑损伤伴出血	创伤性硬脑膜下出血;创伤性蛛网膜下腔出血;肺气肿;肺部感染;胸腔积液;下肢深静脉血栓形成;心包积液;脂肪肝;肋骨多处骨折	好转	张弩	周辉	俞丽生	脑内血肿清除术;脑脊液漏修补术;颞肌下减压术
226	F04脑外	2024-01-03	2024-02-18	3480012	柯昌均	男	54Y	创伤性硬脑膜下血肿	多发性大脑挫裂伤;腰椎骨折;肋骨多处骨折;胸腔积液;肺挫伤;下肢动脉粥样硬化;下肢静脉血栓形成;上颌窦炎	好转	张弩	周辉	俞丽生	脑膜切开伴硬脑膜下腔血肿清除术
227	F04脑外	2024-03-09	2024-03-26	3486725	陈良香	女	64Y	大脑动脉血栓形成引起的脑梗死	高血压;心房颤动;胆囊结石;肋骨骨折;慢性多鼻窦炎;下肢静脉血栓形成	好转	尹波	李丹东	方均浩	经导管颅内血管血栓去除术;脑动脉造影术
228	F04脑外	2024-04-19	2024-05-16	3501877	麻时尧	男	76Y	基底节出血	脑室出血;腔隙性脑梗死;肋骨多处骨折;锁骨骨折;肺部感染;胸腔积液;低钾血症;脑出血后遗症;下肢动脉粥样硬化;下肢静脉血栓形成;后天性肾囊肿;二尖瓣反流	好转	尹波	李丹东	段人桦	脑室外引流[EVD]装置置入术
229	F04脑外	2024-05-09	2024-05-27	3505320	吴志礼	男	67Y	丘脑出血	脱髓鞘性白质脑病;老年性脑萎缩;肺气肿;陈旧性肋骨骨折;泌尿道感染;下肢静脉血栓形成	好转	盛汉松	许尚虞	许尚虞	立体定向颅内血肿穿刺引流术
230	F04脑外	2024-05-31	2024-06-22	3513804	虞位荣	男	84Y	骨质疏松伴有病理性骨折	颈内动脉狭窄脑梗死;大脑中动脉狭窄;冠状动脉粥样硬化性心脏病;冠状动脉支架植入后状态;高血压;老年性脑萎缩;前列腺增生;腹股沟斜疝;下肢动脉粥样硬化;肾结石;腰椎间盘突出;下肢静脉血栓形成	好转	尹波	李丹东	方均浩	脑动脉造影术;腰椎骨折球囊扩张成形术
231	F04脑外	2024-05-13	2024-07-07	3518676	金育龙	男	65Y	创伤性硬脑膜下出血	创伤性脑疝;顶骨骨折;颞骨骨折;肺挫伤;肾结石;慢性胃炎;髋关节积液;下肢静脉血栓形成	好转	张弩	周辉	俞丽生	脑膜切开伴硬脑膜下腔血肿清除术;颅压监护探极置入术;脑室外引流[EVD]装置置入术;颅骨去骨瓣减压术;脑内血肿清除术
232	F04脑外	2024-10-24	2024-11-02	3563208	叶高跑	男	61Y	大脑动脉血栓形成引起的脑梗死	头皮血肿;陈旧性肋骨骨折;心房颤动;脂肪肝;胆囊结石;二尖瓣及主动脉瓣关闭不全;下肢静脉血栓形成	好转	尹波	李丹东	段人桦	经皮颅内动脉取栓术;脑血管造影
233	F04脑外	2024-10-21	2024-11-03	3563309	王贻松	男	51Y	颈动脉血栓形成脑梗死	大脑中动脉血栓形成;痛风;肺气肿;低钾血症;胸腔积液;外踝骨折	好转	尹波	李丹东	段人桦	经皮颈动脉取栓术;脑血管造影;颈动脉支架经皮置入术;置入一根血管的支架;单根血管操作;经皮颈动脉球囊扩张成形术
234	F04脑外	2024-09-29	2024-11-16	3568394	徐玉琴	女	57Y	脑挫伤	创伤性硬脑膜下血肿;枕骨骨折;头皮血肿;创伤性蛛网膜下出血;颅腔积气;下肢静脉血栓形成;胸腔积液;肺肿物	好转	尹波	李丹东	段人桦	脑膜切开伴硬脑膜下腔血肿清除术;脑内血肿清除术
235	F04脑外	2024-11-15	2024-12-14	3579905	郑传满	男	70Y	脑挫伤	创伤性硬膜下出血;创伤性蛛网膜下出血;颞骨骨折;2型糖尿病;高血压;肺部感染;肺脓肿伴有肺炎;脂肪肝;肺肿物;下肢静脉肌间血栓形成	好转	尹波	李丹东	方均浩
236	F04脑外	2024-12-08	2024-12-25	3584099	陈兰花	女	67Y	颅骨缺损修补	开放性脑挫伤;创伤性硬脑膜下积液;枕骨骨折;高血压;2型糖尿病;甲状腺功能减退症;下肢静脉血栓形成;胆囊结石;下肢动脉粥样硬化	其他	盛汉松	许尚虞	许尚虞	颅骨修补术
237	F05脑外	2023-11-24	2024-01-06	3467508	刘会有	男	60Y	局灶性大脑挫伤伴出血	创伤性硬脑膜下出血;枕骨骨折;肺部感染;胸腔积液;泌尿道感染;两根肋骨骨折不伴第一肋骨骨折;锁骨骨折;胫骨近端骨折伴腓骨骨折;膝关节退行性病变;下肢静脉血栓形成;下肢动脉粥样硬化	好转	王怀瓯	陈彦克	蔡铭	脑内血肿清除术;脑清创术;颅骨去骨瓣减压术;侧脑室腹腔内分流术;颅骨修补术;锁骨骨折切开复位钢板内固定术;锁骨人工骨植骨术;胫骨骨折切开复位钢板内固定术;胫骨人工骨植骨术
238	F05脑外	2023-12-07	2024-01-10	3469511	郑经会	男	65Y	创伤性小脑挫伤	创伤性硬脑膜下出血;创伤性蛛网膜下腔出血;颅骨和面骨多发性骨折;头皮裂伤;头皮血肿;腰椎骨折;耻骨骨折;髋臼骨折;肺大疱;筛窦蝶窦炎;上颌窦囊肿;乳突炎;下肢静脉血栓形成;肝囊肿;胆囊息肉	好转	张弩	周辉	俞丽生	石膏绷带固定;石膏绷带固定
239	F05脑外	2023-12-08	2024-01-13	3470846	叶云芳	男	67Y	基底动脉闭塞脑梗死	颅内椎动脉夹层;头皮血肿;动脉硬化;动脉狭窄;肺部感染;胸腔积液;肺诊断性影像异常;颈椎骨折;跟骨骨折;肋骨骨折;低蛋白血症;颈椎退行性病变;下肢静脉血栓形成;后天性肾囊肿;肾结石;跗骨骨折;前列腺增生;前列腺钙化灶;肝病	好转	尹波	李丹东	李丹东	脑动脉造影术;脑动脉内溶栓术
240	F05脑外	2024-01-10	2024-03-12	3483414	张永香	女	69Y	脑积水	脑术后;肺部感染;肋骨骨折;2型糖尿病;高血压;下肢动脉粥样硬化;锁骨下动脉粥样硬化;陈旧性腰椎骨折;下肢静脉血栓形成	好转	张弩	周辉	俞丽生	脑室-腹腔分流术
241	F05脑外	2024-05-20	2024-06-19	3512950	陈永辉	男	67Y	创伤性硬脑膜下出血	脑挫伤;创伤性蛛网膜下出血;颞骨骨折;肺部感染;肝功能不全;肝囊肿;下肢深静脉血栓形成;后天性肾囊肿	好转	张弩	周辉	卢相琦	脑膜切开伴硬脑膜下腔血肿清除术
242	F05脑外	2024-07-28	2024-08-07	3530370	宋孝珍	男	62Y	创伤性脑疝	创伤性蛛网膜下腔出血;创伤性硬脑膜下出血;顶骨骨折;枕骨骨折;肺部感染;高血压;枢椎齿状突骨折;颈椎间盘突出;下肢静脉血栓形成	好转	盛汉松	许尚虞	许尚虞
243	F05脑外	2024-08-09	2024-09-20	3546965	陈爱娇	女	75Y	丘脑出血	颅内感染;肺部感染;下肢深静脉血栓形成;多发性脑梗死;老年性脑变性，不可归类在他处者;陈旧性肋骨骨折;先天性肋骨畸形;下肢动脉粥样硬化;胆囊结石;特发性(原发性)高血压;脂肪肝	好转	尹波	李丹东	李丹东	脑室外引流[EVD]装置置入术;下肢静脉造影
244	F05脑外	2024-07-27	2024-10-15	3555880	方加亨	男	67Y	脑挫伤	脑积水;颅骨缺损修补;颅底骨折;脑脊液耳漏;创伤性硬脑膜下血肿;创伤性蛛网膜下腔出血;肋骨多处骨折;胸椎骨折;腰椎骨折;下肢静脉血栓形成;创伤性血气胸;腹膜后血肿	好转	张弩	周辉	蔡铭	颅骨修补术
245	F05脑外	2024-10-15	2024-11-11	3566720	方加亨	男	67Y	脑外伤后综合征	创伤后脑积水;昏迷;脑软化灶;脑脊液分流状态;脑出血后遗症;气管造口状态;肺部感染;胸腔积液;下肢动脉粥样硬化;股静脉血栓形成;肋骨多发性骨折伴第一肋骨骨折;胸椎压缩性骨折;腰椎骨折;锁骨骨折;脂肪肝;后天性肾囊肿;肾错构瘤	好转	张弩	俞丽生	卢相琦
246	F05脑外	2024-10-22	2024-11-29	3573779	陈兰花	女	67Y	创伤性硬脑膜下出血	脑挫伤;颅底骨折;枕骨骨折;头皮血肿;特发性(原发性)高血压;糖尿病;胆囊结石;肝钙化灶;下肢静脉血栓形成	好转	盛汉松	许尚虞	许尚虞	脑膜切开伴硬脑膜下腔血肿清除术;暂时性气管切开术
247	F06(急ICU)	2024-03-14	2024-05-11	3500380	陈永华	男	57Y	大面积肺栓塞	呼吸衰竭;梗阻性休克;心脏停搏复苏成功;缺氧缺血性脑病;癫痫;肺部感染;下肢深静脉血栓形成;头皮血肿;肋骨骨折;肺大疱;肝囊肿;单纯性肾囊肿;胃麻痹;腰椎峡部裂	好转	孙来芳	孙来芳	王婷婷4
248	F06(急ICU)	2024-05-19	2024-05-20	3503338	吴小某	女	79Y	大面积肺栓塞	心脏停搏复苏成功;非感染性多器官功能障碍综合征(MODS);缺氧缺血性脑病;代谢性酸中毒;肺部感染;骨折术后;肋骨多处骨折;胸腔积液;肺不张;下腔静脉血栓形成;胆囊结石;脂肪肝;下肢动脉粥样硬化	未愈	孔万权	王征	王征	静脉穿刺术
249	F06(急ICU)	2024-05-14	2024-05-29	3506134	冷杏员	女	81Y	股骨粗隆间骨折	失血性休克;肋骨骨折;肺挫伤;血气胸;创伤性皮下气肿;纵隔气肿;骨盆骨折;肩胛骨骨折;耻骨骨折;肝功能不全;肾功能不全;肺部感染;下肢静脉血栓形成;下肢动脉粥样硬化;贫血;心脏停搏复苏成功	好转	胡雪珍	胡雪珍	胡雪珍	股骨骨折闭合复位螺钉内固定术;下腔静脉滤器置入术;下肢静脉造影
250	F06(急ICU)	2024-08-10	2024-08-21	3535780	王金法	男	77Y	消化道出血	失血性休克;肾功能不全;心功能不全;急性冠脉综合征;肺部感染;下肢动脉粥样硬化;颈椎骨折;胸椎骨折;头皮血肿;肾结石;退行性主动脉瓣疾患;主动脉(瓣)关闭不全;下肢静脉血栓形成;头皮血肿;肾结石	好转	孔万权	杨婷	杨婷
251	G03神经内科	2024-04-01	2024-04-23	3495494	陈克兰	男	73Y	基底节出血	肺部感染;高血压;心房颤动;陈旧性锁骨骨折;下肢动脉粥样硬化;胸腔积液;肺诊断性影像异常;慢性支气管炎;脾大;下肢静脉肌间血栓形成	好转	张雄	周莉莉	周莉莉
252	G03神经内科	2024-08-17	2024-08-25	3537016	郭增荣	男	75Y	周围性面神经麻痹	阿尔茨海默病;腔隙性脑梗死;骨折术后;肝囊肿;下肢静脉肌间血栓形成;退行性主动脉瓣疾患;心功能不全;面神经炎	好转	胡蓓蕾	陈轲扬	陈轲扬
253	G03神经内科	2024-09-16	2024-09-24	3548530	徐爱兰	女	70Y	前庭周围性眩晕	胸椎压缩性骨折;锁骨下动脉粥样硬化;下肢静脉肌间血栓形成;高脂血症;脂肪肝;胆囊结石;低钾血症;下肢动脉粥样硬化	好转	韩钊	李岩	朱兰兵
254	G03神经内科	2024-10-27	2024-11-02	3563147	谢成周	男	78Y	大脑动脉的闭塞或狭窄引起的脑梗死	脑内出血;颈内动脉闭塞;肺部感染;胸腔积液;脑梗死后遗症;特发性(原发性)高血压;骨质疏松伴有病理性骨折;肺气肿合并肺大泡;下肢静脉肌间血栓形成;颈内动脉狭窄;颈总动脉斑块;下肢动脉粥样硬化	好转	陈松芳	朱娟娟	朱娟娟
255	G03神经内科	2024-11-18	2024-11-25	3572126	吴光美	女	75Y	大脑动脉狭窄脑梗死	颈动脉硬化;锁骨下动脉斑块;下肢动脉粥样硬化;特发性(原发性)高血压;2型糖尿病;下肢静脉血栓形成;抑郁状态;腰椎压缩性骨折;肺诊断性影像异常;肾结石;后天性肾囊肿;手术后状态，其他特指的	好转	胡蓓蕾	胡蓓蕾	胡蓓蕾
256	G04(神内+老年)	2024-08-12	2024-08-24	3536544	孙宏建	男	63Y	大脑动脉血栓形成引起的脑梗死	特发性(原发性)高血压;高脂血症;胸腺动态未定或动态未知的肿瘤;颈动脉硬化;锁骨下动脉粥样硬化;下肢动脉粥样硬化;肾积水伴肾输尿管结石;陈旧性锁骨骨折;前列腺结石;上颌窦炎;脂肪肝;后天性肾囊肿	好转	徐珑珑	金露	金露
257	G04(神内+老年)	2024-12-01	2024-12-08	3577139	谢成周	男	78Y	脑梗死	偏瘫;吞咽困难;言语障碍;神经源性膀胱;神经源性肠;运动障碍;涉及使用康复操作的医疗;特发性(原发性)高血压;肺部感染;骨质疏松伴有病理性骨折;卒中后抑郁;脑梗死后遗症;肺气肿合并肺大泡;下腔静脉血栓形成;下肢动脉粥样硬化	好转	柯将琼	邵胜敏	李勇
258	H07骨科综合病区	2024-01-07	2024-01-15	3472013	郑红弟	女	88Y	股骨颈骨折	下肢静脉血栓形成;肝钙化灶;心功能不全;二尖瓣及主动脉瓣关闭不全;室间隔肥大	治愈	王鉴顺	王鉴顺	卢迪	人工股骨头置换术;关节镜髋关节滑膜切除术;髋轴面，金属与聚乙烯
259	H07骨科综合病区	2023-12-25	2024-01-15	3472060	董绍新	男	86Y	尺骨桡骨闭合性骨折	创伤性蛛网膜下出血;脑挫伤;眶骨骨折;颧骨骨折;上颌窦骨折;创伤性脑内血肿;颈椎退行性病变;颈椎间盘突出;下肢动脉粥样硬化;下肢静脉血栓形成;急性闭角型青光眼;主动脉钙化;肺钙化;肾结石;前列腺结石;具有心脏起搏器;高血压;脱髓鞘性脑病;肺挫伤	好转	林露阳	林露阳	项洪武	桡骨和尺骨骨折开放性复位术伴内固定;股静脉穿刺术;下腔静脉滤器置入术;肘关节镜下软骨修复术;桡骨小头切除术;肘关节成形术;桡骨和尺骨移植术;桡骨和尺骨使用外固定装置
260	H07骨科综合病区	2024-03-14	2024-03-20	3485350	周昌洪	男	77Y	股骨粗隆间骨折	下肢静脉血栓形成;腰椎术后;陈旧性肺结核;心功能不全;退行性主动脉瓣疾患;下肢动脉粥样硬化	好转	冯永增	冯永增	王贤亮	股骨骨折闭合复位髓内针内固定术
261	H07骨科综合病区	2024-03-09	2024-03-28	3487455	陈瑞福	男	67Y	手术后皮肤坏死	2型糖尿病;骨折术后;下肢静脉血栓形成;胸骨骨折;肺诊断性影像异常	治愈	宋永焕	宋永焕	朱旭伟	皮肤和皮下坏死组织切除清创术;皮肤和皮下坏死组织切除清创术;创面封闭式负压引流术（VSD);带蒂皮瓣移植术;中厚皮片移植术
262	H07骨科综合病区	2024-03-31	2024-04-07	3490202	郭增荣	男	75Y	股骨颈骨折	老年性痴呆;腔隙性脑梗死;老年性脑萎缩;肝囊肿;下肢静脉血栓形成;退行性主动脉瓣疾患;心功能不全	好转	冯永增	冯永增	王贤亮	人工股骨头置换术
263	H07老年康复	2024-04-11	2024-05-08	3499537	王佩秋	女	70Y	膝关节僵硬	胫骨平台骨折;膝关节十字韧带损伤;膝关节副韧带损伤;膝关节内侧副韧带损伤;创伤后伤口感染;膝关节退行性病变;膝关节积液;下肢静脉血栓形成;下肢动脉粥样硬化;膝部挫伤;涉及使用其他康复操作的医疗;手术后恢复期	好转	屠文展	郑余银	陈文斯
264	H07老年康复	2024-04-15	2024-05-12	3500537	郑元杰	男	39Y	腰部脊髓损伤	创伤性截瘫;脊髓病性膀胱;神经源性肠;物理治疗，其他的;腰椎术后;腰椎骨折L2;腰骶椎间盘突出;下肢静脉肌间血栓形成;泌尿道感染	好转	蒋松鹤	卢君艳	程博	针刺
265	H07老年康复	2024-04-29	2024-05-19	3502819	徐志成	男	54Y	肋骨骨折	肺挫伤;创伤性胸腔积液;肺诊断性影像异常;纵隔脂肪瘤;肝囊肿;后天性肾囊肿;结肠憩室;关节固定术后假关节形成;下肢静脉肌间血栓形成;涉及使用其他康复操作的医疗	好转	屠文展	屠文展	陈文斯	超短波短波疗法;骨创伤治疗仪使用
266	H07老年康复	2024-03-23	2024-05-22	3503691	程云生	男	73Y	颈部脊髓损伤	运动障碍;皮肤感觉障碍;神经源性膀胱;神经源性肠;四肢瘫痪;由于活动能力降低而需要帮助;肩峰骨折;颧弓骨折;多处挫伤;肺部感染;胸腔积液;肺不张;下肢静脉肌间血栓形成;泌尿道感染;受压区压疮;脊柱血管瘤;附睾炎	好转	蒋松鹤	卢君艳	程博	留置导尿管的置入术;吸氧;针刺;截瘫肢体综合训练;运动训练;作业疗法;下腔静脉滤器置入术;下腔静脉造影;颈椎后路单开门椎管减压术;胸椎骨折球囊扩张成形术;颈椎人工骨植骨术;椎骨内固定术
267	H07老年康复	2024-05-18	2024-06-12	3510295	陈良香	女	64Y	入脑前动脉血栓形成引起的脑梗死	运动障碍;言语障碍;涉及使用康复操作的医疗;高血压;2型糖尿病;低钾血症;心房颤动;腰椎术后;胆囊结石;陈旧性肋骨骨折;全组鼻窦炎;下肢静脉血栓形成;下肢动脉粥样硬化	好转	屠文展	屠文展	陈文斯	针刺;偏瘫肢体综合训练;运动训练;作业疗法;低频脉冲电治疗;语言治疗;行走和步态训练;重复经颅磁刺激[rTMS]
268	H07老年康复	2024-06-28	2024-08-07	3530156	张长平	男	48Y	上颌骨骨折	牙槽骨骨折;蝶骨骨折;下颌骨骨折;心包积液;胸骨骨折;面部软组织挫伤;吞咽困难;涉及使用其他康复操作的医疗;肺部感染;下肢静脉血栓形成;创伤性纵隔血肿;心包积液;脂肪肝	好转	屠文展	屠文展	金韵	骨创伤治疗仪使用;超短波短波疗法;超声波联合治疗;上颌骨骨折切开复位内固定术;下颌骨骨折切开复位内固定术
269	H07老年康复	2024-07-22	2024-08-10	3531234	林三豹	男	84Y	股骨粗隆间骨折	肋骨多处骨折;物理治疗，其他的;肺部感染;呼吸衰竭;胸腔积液;下肢静脉血栓形成;下肢动脉粥样硬化;中度贫血;高血压;脑梗死个人史;骨折术后	好转	蒋松鹤	卢君艳	林乐2	股骨骨折闭合复位髓内针内固定术;运动训练;超短波短波疗法;骨创伤治疗仪使用;悬吊治疗;其他物理治疗;心脏再训练
270	H07老年康复	2024-07-04	2024-08-14	3533014	谢林丐	男	64Y	弥散性大脑损伤伴出血	脑挫伤;创伤性蛛网膜下腔出血;脑出血后物理康复训练;腓骨骨折;跟腱断裂;创伤性胸腔积液;腹腔积液;下肢静脉肌间血栓形成;胫骨良性肿瘤;2型糖尿病;高血压;创伤性失明;后天性肾囊肿;低钠血症;甲状腺结节	好转	蒋松鹤	卢君艳	程博	运动训练;骨创伤治疗仪使用;超短波短波疗法;超声疗法;电动起立床训练
271	H07老年康复	2024-07-10	2024-08-21	3535481	陈尔爱	男	65Y	腰椎骨折	股骨骨折;马尾损伤;神经源性肠;膝关节僵硬;神经源性膀胱;双踝骨折;膝外侧半月板伴十字韧带损伤;髋关节僵硬;膝关节骨软骨炎;膝关节积液;下肢静脉肌间血栓形成;下肢动脉粥样硬化;贫血	好转	蒋松鹤	卢君艳	程博	腰椎骨折切开复位内固定术;股骨骨折闭合复位髓内针内固定术;跟骨骨折切开复位钢板内固定术;关节软骨修复术;跟骨人工骨植骨术;运动训练;骨创伤治疗仪使用
272	H07老年康复	2024-07-31	2024-08-26	3537391	高丐俊	男	55Y	脾损伤	创伤性休克;掌骨骨折，其他的;桡骨骨折;腰椎骨折;腹腔积血;肺气肿;肾上腺血肿;下肢静脉肌间血栓形成;肝囊肿;肾错构瘤;脂肪肝;下肢动脉粥样硬化	好转	蒋松鹤	卢君艳	程博	全脾切除术;腹腔冲洗检查;桡骨骨折切开复位钢板内固定术;掌骨骨折切开复位钢针内固定术;关节软骨修复术;伸指肌腱缝合术;掌骨人工骨植骨术
273	H07老年康复	2024-08-23	2024-10-16	3556147	雷华远	男	40Y	支气管损伤	涉及使用其他康复操作的医疗;肋骨多处骨折;肺挫伤;肺部感染;胸骨骨折;颈椎横突骨折;胸椎横突骨折;胸椎骨折;胸椎棘突骨折;锁骨骨折;肩胛骨骨折;肱骨骨折;头皮挫伤;面部软组织挫伤;受压区压疮;挤压伤;创伤性皮下气肿;中度贫血;低蛋白血症;肝功能不全;高血压;下肢静脉血栓形成	好转	蒋松鹤	卢君艳	林心心	毫针刺法;锁骨骨折切开复位钢板内固定术;气管镜支气管支架置入术;肋骨骨折闭合复位内固定术;骨创伤治疗仪使用;低频脉冲电治疗;运动训练;作业疗法;锁骨人工骨植骨术;肱骨骨折切开复位钢板内固定术;肘关节的其他修补术;肱骨人工骨植骨术
274	H07老年康复	2024-09-09	2024-11-10	3566198	陈蓉	女	81Y	膝关节僵硬	骨折术后;冠状动脉粥样硬化性心脏病;涉及使用其他康复操作的医疗;十二指肠溃疡;胸腔积液;主动脉钙化;下肢静脉肌间血栓形成;颈动脉硬化;肝血管瘤	好转	蒋松鹤	屠文展	陈文斯	关节松动法;运动训练;超声波联合治疗;低频脉冲电治疗;艾灸;平衡功能训练
275	H07老年康复	2024-10-26	2024-11-23	3571463	黄阿翠	女	87Y	股骨粗隆间骨折	慢性硬膜下血肿;肺部感染;胸腔积液;脑术后;泌尿道感染;2型糖尿病;高血压;低钾血症;心房颤动;胸椎术后;静脉血栓形成;受压区压疮;老年性脑变性，不可归类在他处者;乳房疾患;梅毒;下肢动脉粥样硬化;涉及使用其他康复操作的医疗	好转	蒋松鹤	卢君艳	程博	运动训练;低频脉冲电治疗;艾灸
276	H07老年康复	2024-09-26	2024-11-26	3572539	周步法	男	67Y	脊髓损伤	胸椎骨折T9/T10;创伤性截瘫;神经源性膀胱;神经源性肠;涉及使用其他康复操作的医疗;运动障碍;胸椎棘突骨折;血气胸;肺部感染;泌尿道感染;肺不张;胸腔积液;下肢动脉粥样硬化;静脉血栓形成;小腿挫伤;多发性脑梗死;多处开放性伤口;头部的损伤;肾结石	好转	蒋松鹤	卢君艳	林心心	胸椎骨折切开复位内固定术;运动训练;呼吸训练;低频脉冲电治疗;骨创伤治疗仪使用;针刺;支气管镜下诊断性支气管肺泡灌洗[BAL]
277	H07老年康复	2024-11-09	2024-12-10	3578021	章福美	男	49Y	运动障碍	截瘫;神经源性膀胱;神经源性肠;肿瘤性病理性骨折;胸骨继发恶性肿瘤;后天性肾囊肿;前列腺结石;下肢静脉肌间血栓形成;涉及使用康复操作的医疗	治愈	蒋松鹤	卢君艳	程博	针刺;截瘫肢体综合训练;运动训练
278	H07老年康复	2024-11-27	2024-12-23	3583132	郑玉蝉	女	73Y	偏瘫	运动障碍;言语障碍;吞咽困难;涉及使用其他康复操作的医疗;大脑动脉狭窄;颈动脉硬化;高血压;股骨干骨折;锁骨骨折;下肢静脉肌间血栓形成;泌尿道感染;带状疱疹不伴有并发症;频发性房性期前收缩;阵发性房性心动过速;阵发性室性心动过速	好转	屠文展	屠文展	陈文斯	电针治疗;语言障碍训练;运动训练;作业疗法;低频脉冲电治疗;骨创伤治疗仪使用;蜡疗;超声波联合治疗
279	H07老年康复	2024-10-15	2024-12-23	3583162	曹进和	男	82Y	肋骨多处骨折	双踝骨折;硬脑膜下积液;多处开放性伤口;血气胸;胸壁畸形;肌腱和肌肉损伤;肺功能不全;肺部感染;泌尿道感染;胸椎压缩性骨折;腰椎间盘突出;恶性肿瘤个人史;下肢动脉粥样硬化;静脉血栓形成;后天性肾囊肿;肾结石;涉及使用其他康复操作的医疗	好转	蒋松鹤	卢君艳	林心心	肋骨骨折切开复位内固定术;骨创伤治疗仪使用;下腔静脉滤器置入术;下肢静脉造影;腓骨骨折切开复位钢板内固定术;呼吸训练;电针治疗;腓骨人工骨植骨术;踝融合术;胫骨骨折闭合复位髓内针内固定术;皮肤和皮下坏死组织切除清创术;气管内插管;呼吸机治疗[大于等于96小时]
280	H08胸外	2024-06-08	2024-06-17	3512007	王月儿	女	66Y	胸椎骨折	腰椎骨折;肋骨骨折;创伤性胸腔积液;肺挫伤;创伤性蛛网膜下腔出血;头皮血肿;肾挫伤;小腿挫伤;高血压;肝囊肿;后天性肾囊肿;下肢静脉肌间血栓形成	治愈	章岳峰	章岳峰	谷利中	胸椎骨折球囊扩张成形术
281	H08胸外	2024-06-17	2024-07-01	3516501	项青花	女	76Y	肺上叶恶性肿瘤	胸腔积液;心包积液;高血压;下肢动脉粥样硬化;下肢深静脉血栓形成;中枢神经系统脱髓鞘病;腔隙性脑梗死;老年性脑萎缩;肝囊肿;骨折术后	好转	黄宪平	黄宪平	朱栋辉	肺穿刺活检
282	H08胸外	2024-06-10	2024-07-07	3518357	黄美华	女	68Y	创伤性蛛网膜下腔出血	创伤性胸腔积液;肺挫伤;肺部感染;鼻骨骨折;眶骨骨折;皮肤裂伤;唇部损伤;肋骨骨折;腰椎骨折;多处皮肤浅表擦伤;髌骨骨折;髌韧带损伤;弥漫性轴索损伤;创伤性硬脑膜下积液;2型糖尿病;高血压2级;脂肪肝;肝功能不全;神经源性膀胱;下肢静脉肌间血栓形成;下肢动脉粥样硬化	治愈	章岳峰	章岳峰	谷利中
283	H08胸外	2024-08-05	2024-09-08	3542291	张荷花	女	71Y	创伤性脾破裂	腹腔积液;血容量不足性休克;四根以上肋骨骨折不伴第一肋骨骨折;创伤性皮下气肿;急性呼吸窘迫综合征;创伤性胸腔积液;头皮血肿;下颌骨骨折;肝损害;颈椎退行性病变;腰椎峡部裂;腰椎间盘突出;脊柱血管瘤;膀胱结石;下肢静脉血栓形成;颈椎间盘突出	治愈	章岳峰	章岳峰	吴威佳	全脾切除术;腹腔冲洗检查
284	H08胸外	2024-08-27	2024-09-11	3543451	王加叨	男	82Y	四根以上肋骨骨折不伴第一肋骨骨折	开放性胸部损伤;液气胸;踝部擦伤;窦性心动过缓;阿尔茨海默病;下肢静脉肌间血栓形成;创伤性胸腔积液;前列腺恶性肿瘤;前列腺术后;腰椎术后	治愈	章岳峰	章岳峰	吴威佳	肋骨骨折切开复位内固定术
285	H08胸外	2024-08-21	2024-09-27	3549687	黄修土	男	69Y	髂骨骨折	髋臼骨折;耻骨骨折;头皮血肿;肩胛骨骨折;肺挫伤;膈疝;闭合性气胸;腓骨骨折;膝关节内侧副韧带损伤;膝关节囊韧带松弛;肺肿物;肝囊肿;下肢静脉肌间血栓形成	治愈	赵曙光	赵曙光	陈凯	骨盆骨折切开复位钢板内固定术;膝关节的其他修补术;髂动脉栓塞术;经胸膈疝修补术;关节软骨修复术;胸腔穿刺术;骨移植术;髋臼部分切除术;踝关节骨折切开复位术;膝关节病损切除术
286	H08胸外	2024-10-31	2024-11-09	3565503	余恩珍	女	67Y	四根以上肋骨骨折不伴第一肋骨骨折	肌腱和肌肉损伤;2型糖尿病;高脂血症;脂肪肝;单纯性肾囊肿;肝囊肿;下肢静脉肌间血栓形成	治愈	刘勇2	刘勇2	谷利中
287	H08胸外	2024-09-15	2024-11-09	3565928	章福美	男	49Y	肺下叶恶性肿瘤	淋巴结继发恶性肿瘤;骨继发恶性肿瘤;病理性骨折，不可归类在他处者;截瘫[双下肢瘫痪];下肢静脉肌间血栓形成	好转	黄宪平	黄宪平	朱栋辉	支气管镜下肺活检
288	H10胆胰外科	2024-01-09	2024-02-24	3480627	卢碎华	男	57Y	创伤性脾破裂	胸腹主动脉夹层;脊柱变性;腹水;肋骨骨折;创伤性胸腔积液;腰椎峡部裂;创伤性蛛网膜下腔出血;心包积液;头皮血肿;掌骨骨折;下肢深静脉血栓形成;失血性休克;心脏挫伤;锁骨骨折;掌骨骨折;失血性休克	治愈		艾鹏		部分脾切除术;锁骨骨折闭合复位钢板内固定术;寰-枢椎融合术，后入路;胸主动脉覆膜支架腔内隔绝术;股动脉穿刺术;踝关节骨折切开复位钢针内固定术;掌骨骨折闭合复位钢板内固定术;开腹探查术
289	H10胆胰外科	2024-07-17	2024-08-06	3529844	毛爱兰	女	84Y	慢性阻塞性肺病伴有急性加重	胆总管结石;呼吸衰竭;肺源性心脏病;心功能不全;肺动脉高压;胸腔积液;肺部感染;心房颤动;老年性心脏病;退行性主动脉瓣疾患;二尖瓣反流;三尖瓣关闭不全;脑梗死;下肢动脉粥样硬化;下肢静脉血栓形成;尺骨远端骨折伴桡骨远端骨折;肾结石;后天性肾囊肿;盆腔积液;高血压2级	好转	徐昌隆	王文星	叶梦思
290	H10胆胰外科	2024-07-09	2024-09-08	3542351	项淑青	女	55Y	胆管恶性肿瘤	下肢静脉肌间血栓形成;肺不张;病理性骨折，不可归类在他处者;胸腔积液;腹腔积液;肺肿物;低蛋白血症;肺部感染	好转	王向昱	王向昱	王向昱	创面封闭式负压引流术（VSD);创面封闭式负压引流术（VSD)
291	H11颈部外科	2023-12-31	2024-01-08	3468730	厉竹兰	女	85Y	甲状腺良性肿瘤	原发性甲状旁腺功能亢进;高钙血症;下肢静脉血栓形成;腰椎骨折;高血压;2型糖尿病;冠状动脉粥样硬化性心脏病;冠状动脉支架植入后状态;心房颤动;心功能不全;手术后状态，其他特指的	未愈	张银龙	李丕宏	韩一帆	单侧甲状腺部分切除术
292	H11颈部外科	2024-05-09	2024-05-16	3502088	邵候妹	女	75Y	股骨粗隆间骨折	下肢静脉肌间血栓形成;心功能不全;泌尿道感染	好转	黄俊武	余贤斌	马亮亮	股骨骨折闭合复位髓内针内固定术
293	H12介入综合外科	2024-12-23	2024-12-24	3583786	陈福香	女	82Y	取除下腔静脉滤器	下肢深静脉血栓形成;股骨骨折;高血压	其他	郑祥韬	艾鹏	潘浩	下腔静脉滤器取出术;下肢静脉造影
294	H12介入综合外科	2024-12-28	2024-12-30	3586307	朱小映	女	51Y	取除下腔静脉滤器	下肢深静脉血栓形成;血管支架植入术后状态;腰椎骨折L2;胆囊息肉;脂肪肝	其他	郑祥韬	艾鹏	高自勉	下腔静脉滤器取出术;下肢静脉造影;股静脉穿刺术
295	H13内分泌血管外科	2024-01-02	2024-01-04	3467115	陈德英	女	65Y	血管通路装置的调整和管理	下肢深静脉血栓形成;肺诊断性影像异常;陈旧性肋骨骨折;髌骨骨折;胆囊结石;后天性肾囊肿	其他	郑祥韬	艾鹏	陈魁	下腔静脉滤器取出术;下肢静脉造影
296	H13内分泌血管外科	2023-12-26	2024-01-06	3467603	俞学全	男	58Y	下肢深静脉血栓形成	胸腔积液;心功能不全;胫骨平台骨折;后天性肾囊肿;前列腺增生	治愈	郑祥韬	郑祥韬	陈魁	经皮下肢静脉取栓术;下肢静脉置管溶栓术;下腔静脉滤器置入术;股静脉穿刺术;下肢静脉造影
297	H13内分泌血管外科	2024-01-31	2024-02-03	3478655	江爱味	女	58Y	取除下腔静脉滤器	下肢静脉血栓形成;锁骨骨折;跟骨骨折;腓骨骨折;陈旧性肋骨骨折;创伤性湿肺;特发性(原发性)高血压;肺的其他疾患;多发性脑梗死;老年性脑萎缩;后天性肾囊肿;肋骨多处骨折	其他	郑祥韬	陈聪	潘浩
298	H13内分泌血管外科	2024-03-02	2024-03-04	3481865	张召葱	男	54Y	血管通路装置的调整和管理	下肢静脉血栓形成;骨折治疗后恢复期;颅内损伤;帕金森病;老年性心脏瓣膜病	其他	郑祥韬	艾鹏	高自勉	下腔静脉滤器取出术;下肢静脉造影
299	H13内分泌血管外科	2024-03-04	2024-03-09	3482722	张春梅	女	84Y	下肢深静脉血栓形成	骨折术后恢复期;人工髋关节;肺诊断性影像异常;主动脉硬化;冠状动脉粥样硬化;食管裂孔疝;肝钙化灶	好转	郑祥韬	高自勉	高自勉
300	H13内分泌血管外科	2024-03-16	2024-03-18	3484866	温兴顺	男	41Y	血管通路装置的调整和管理	下肢深静脉血栓形成;骨折治疗后恢复期	其他	郑祥韬	艾鹏	陈魁	下腔静脉滤器取出术;下肢静脉造影
301	H13内分泌血管外科	2024-03-24	2024-03-25	3486569	周常成	男	56Y	血管通路装置的调整和管理	下肢深静脉血栓形成;骨折治疗后恢复期;肝囊肿;胆囊结石;前列腺结石;慢性乙型病毒性肝炎	其他	郑祥韬	高自勉	高自勉	下腔静脉滤器取出术;下肢静脉造影
302	H13内分泌血管外科	2024-03-25	2024-03-30	3487908	陈秋莲	女	59Y	下肢深静脉血栓形成	腓骨头骨折;子宫切除术后状态;脂肪肝;肝囊肿;胆囊息肉;下肢动脉粥样硬化;颈椎胸椎椎间盘疾患	治愈	邓超频	陈聪	潘浩	髂静脉支架置入术;髂静脉球囊血管成形术;置入一根血管的支架;单根血管操作;下腔静脉滤器置入术;下肢静脉造影
303	H13内分泌血管外科	2024-03-30	2024-03-31	3488162	许爱梅	女	75Y	血管通路装置的调整和管理	因病人家属原因未进行操作;下肢动脉粥样硬化;下肢静脉血栓形成;脑挫伤;创伤性蛛网膜下腔出血;肝囊肿;后天性肾囊肿;肾结石;骨折治疗后恢复期	其他	邓超频	高自勉	高自勉
304	H13内分泌血管外科	2024-03-27	2024-04-03	3489058	徐爱良	男	77Y	下肢静脉曲张合并静脉炎	下肢血栓性静脉炎;下肢静脉功能不全;特发性(原发性)高血压;下肢动脉粥样硬化;二尖瓣反流;肺诊断性影像异常;陈旧性肋骨骨折;肝囊肿;脂肪肝;前列腺增生;前列腺结石	好转	郑祥韬	高自勉	高自勉	大隐静脉高位结扎和剥脱术;下肢静脉造影
305	H13内分泌血管外科	2024-04-21	2024-04-23	3495488	李光清	男	47Y	下腔静脉滤器血栓形成	下肢深静脉血栓形成;骨折术后恢复期;胸膜肥厚;肺肿物;脂肪肝	好转	郑祥韬	艾鹏	郑继行	下腔静脉导管溶栓;下肢静脉造影;下腔静脉造影
306	H13内分泌血管外科	2024-04-20	2024-04-23	3495496	陈秋莲	女	59Y	取除下腔静脉滤器	下肢深静脉血栓形成;陈旧性腓骨骨折;甲状腺肿;肝囊肿	其他	郑祥韬	陈聪	陈魁	下腔静脉滤器取出术;下肢静脉造影
307	H13内分泌血管外科	2024-05-01	2024-05-10	3500133	杨四民	男	47Y	下肢深静脉血栓形成	腰椎骨折;脂肪肝;肝囊肿	治愈	郑祥韬	陈聪	陈魁	下肢静脉球囊扩张成形术;单根血管操作;下肢静脉置管溶栓术;经皮下肢静脉取栓术;下腔静脉滤器置入术;下肢静脉支架置入术;下肢静脉球囊扩张成形术;单根血管操作;置入一根血管的支架;下肢静脉造影
308	H13内分泌血管外科	2024-05-18	2024-05-20	3503206	杨四民	男	47Y	取除下腔静脉滤器	下肢深静脉血栓形成;腰椎骨折;脂肪肝;肝囊肿	其他	郑祥韬	艾鹏	陈魁	下腔静脉滤器取出术;下肢静脉造影
309	H13内分泌血管外科	2024-05-23	2024-05-27	3505345	肖彩仙	女	62Y	取除下腔静脉滤器	下肢深静脉血栓形成;泌尿道感染;高血压;骨折术后恢复期;肋骨多处骨折;胸椎横突骨折;腰椎骨折	其他	郑祥韬	陈聪	高自勉	下腔静脉滤器取出术;下肢静脉造影
310	H13内分泌血管外科	2024-06-02	2024-06-03	3507427	郑荣国	男	58Y	取除下腔静脉滤器	下肢深静脉血栓形成;肺部感染;胸腔积液;肋骨多处骨折;肺肿物;骨折术后恢复期;高血压;多发性肝囊肿;肝钙化灶	其他	郑祥韬	艾鹏	陈魁	下腔静脉滤器取出术
311	H13内分泌血管外科	2024-06-23	2024-06-25	3514755	刘爱菊	女	73Y	取除下腔静脉滤器	下肢深静脉血栓形成;股骨颈骨折;膝半月板撕裂;膝关节后十字韧带损伤;膝关节积液;膝关节退行性病变;高血压;冠状动脉粥样硬化性心脏病;支气管哮喘;孤立性肺结节;骨质疏松	其他	郑祥韬	潘浩	潘浩	下腔静脉滤器取出术;下肢静脉造影
312	H13内分泌血管外科	2024-06-30	2024-07-01	3516508	张国俊	男	54Y	取除下腔静脉滤器	下肢深静脉血栓形成;陈旧性肋骨骨折;冠状动脉粥样硬化性心脏病	其他	郑祥韬	陈魁	高自勉	下腔静脉滤器取出术;下肢静脉造影
313	H13内分泌血管外科	2024-06-22	2024-07-15	3521565	林成香	女	63Y	髋臼骨折	坐骨骨折;寰枢椎半脱位;腰椎骨折;肋骨多处骨折;胸椎横突骨折;肺挫伤;胸腔积液;下肢静脉血栓形成;下肢动脉粥样硬化;输尿管扩张;后天性肾囊肿	好转	郑祥韬	高自勉	高自勉	下腔静脉滤器置入术;下肢静脉造影;骨盆骨折切开复位钢板内固定术;髋臼成形术;腰椎骨折切开复位内固定术;下腔静脉滤器取出术;下肢静脉造影
314	H13内分泌血管外科	2024-06-20	2024-07-18	3522896	胡三豹	男	51Y	股骨干骨折	桡骨干骨折;胫骨平台骨折;膝关节外侧副韧带部分断裂;膝关节十字韧带损伤;膝半月板撕裂;多处挫伤;下肢静脉血栓形成;后天性肾囊肿;乙肝表面抗原携带者	治愈	郑祥韬	高自勉	高自勉	股骨骨折切开复位钢板内固定术;股二头肌缝合术;坐骨神经探查术;下腔静脉滤器置入术;下肢静脉造影;桡骨骨折切开复位钢板内固定术;桡骨人工骨植骨术;股骨骨折闭合复位螺钉内固定术;股骨人工骨植骨术;下腔静脉滤器取出术;下肢静脉造影
315	H13内分泌血管外科	2024-07-22	2024-07-23	3524751	章成兴	男	65Y	下肢深静脉血栓形成	股骨干骨折;2型糖尿病;胆囊结石	好转	郑祥韬	艾鹏	郑继行	下腔静脉滤器置入术;下肢静脉造影
316	H13内分泌血管外科	2024-07-24	2024-07-28	3526429	陈华琴	女	63Y	下肢深静脉血栓形成	骨折术后;陈旧性膝关节韧带损伤;半月板损伤	好转	郑祥韬	艾鹏	潘浩	下肢静脉造影
317	H13内分泌血管外科	2024-08-01	2024-08-05	3529308	夏念新	男	55Y	下肢深静脉血栓形成	骨髓炎;骨折术后恢复期;孤立性肺结节;肺大疱;原发性甲状腺功能亢进症;脂肪肝;后天性肾囊肿;前列腺增生;前列腺结石	好转	郑祥韬	陈聪	潘浩	下肢静脉造影
318	H13内分泌血管外科	2024-07-20	2024-08-05	3529415	黄宇	男	41Y	胫骨平台骨折	下肢深静脉血栓形成;头皮血肿;肺肿物;肾结石;肝囊肿	治愈	郑祥韬	陈聪	高自勉	胫骨骨折切开复位螺钉内固定术;下腔静脉滤器置入术;下腔静脉滤器取出术;下肢静脉造影
319	H13内分泌血管外科	2024-08-03	2024-08-19	3534818	胡仁莲	女	63Y	膝半月板撕裂	膝关节内侧副韧带损伤;膝关节十字韧带损伤;胫骨平台骨折;下肢深静脉血栓形成;特发性(原发性)高血压;下肢动脉粥样硬化;孤立性肺结节;胸椎退行性病变;脂肪肝;多发性脑梗死	好转	郑祥韬	艾鹏	陈魁	下腔静脉滤器置入术;关节镜膝关节半月板部分切除术;关节镜膝关节副韧带修补术;下腔静脉滤器取出术;下肢静脉造影
320	H13内分泌血管外科	2024-08-25	2024-08-26	3537555	任春云	女	75Y	取除下腔静脉滤器	下肢深静脉血栓形成;糖尿病;高血压;股骨粗隆间骨折;陈旧性锁骨骨折	其他	郑祥韬	陈魁	高自勉	下腔静脉滤器取出术;下肢静脉造影
321	H13内分泌血管外科	2024-09-26	2024-09-30	3550910	陈宝英	女	77Y	2型糖尿病肾病II期	2型糖尿病;高血压性视网膜病变;高血压性心脏病;高脂血症;颈动脉硬化;冠状动脉粥样硬化性心脏病;骨质疏松;泌尿道感染;下肢静脉血栓形成;脂肪肝;后天性肾囊肿;甲状腺结节;肺的其他疾患;炎症后肺纤维化;陈旧性肋骨骨折;主动脉钙化;后天性肾囊肿	好转	潘优津	钱掩映	徐静
322	H13内分泌血管外科	2024-10-05	2024-10-14	3555320	阚建国	男	69Y	下肢深静脉血栓形成	2型糖尿病;高血压;周围血管支架植入术后状态;股骨颈骨折;痴呆	好转	郑祥韬	陈聪	潘浩
323	H13内分泌血管外科	2024-10-15	2024-10-20	3557756	章成兴	男	65Y	下肢深静脉血栓形成	大腿肌间脓肿;2型糖尿病;骨折术后;前列腺增生;前列腺结石	好转	郑祥韬	陈聪	高自勉	下肢静脉造影
324	H13内分泌血管外科	2024-11-09	2024-11-11	3566597	洪求平	男	57Y	取除下腔静脉滤器	下肢深静脉血栓形成;下肢静脉肌间血栓形成;骨折术后恢复期;胆囊结石;脂肪肝	其他	郑祥韬	潘浩	潘浩	下腔静脉滤器取出术;下肢静脉造影
325	H13内分泌血管外科	2024-11-08	2024-11-11	3566732	胡娇妹	女	74Y	下肢深静脉血栓形成	骨折术后;肋骨多处骨折;肝囊肿;肾结石;食管裂孔疝	好转	郑祥韬	郑继行	郑继行	下肢静脉造影
326	H13内分泌血管外科	2024-11-11	2024-11-17	3568970	叶妙妙	女	39Y	下肢深静脉血栓形成	骨折术后恢复期	好转	郑祥韬	艾鹏	潘浩	下肢静脉造影
327	H13内分泌血管外科	2024-12-09	2024-12-17	3580966	朱小映	女	51Y	下肢深静脉血栓形成	下肢静脉肌间血栓形成;腰椎骨折L2;胆囊息肉;脂肪肝	治愈	郑祥韬	艾鹏	郑继行	髂静脉支架置入术;下肢静脉球囊扩张成形术;置入一根血管的支架;单根血管操作;经皮下肢静脉取栓术;下腔静脉滤器置入术;下肢静脉造影;下肢静脉造影
328	H13内分泌血管外科	2024-12-18	2024-12-21	3582444	杨再芬	女	58Y	下肢深静脉血栓形成	骨折术后恢复期;主动脉瓣关闭不全	好转	郑祥韬	艾鹏	潘浩	下肢静脉造影
329	H14呼吸内科	2024-01-06	2024-01-21	3475568	吕选禄	男	79Y	股骨粗隆间骨折	慢性阻塞性肺病伴有急性加重;慢性呼吸衰竭（II型呼吸衰竭）;肺部感染;特发性(原发性)高血压;胸腔积液;肺动脉高压;肾结石;下肢静脉血栓形成;脊柱侧弯;鼻窦炎;动脉硬化	治愈	夏晓东	夏晓东	李慧莹	股骨骨折闭合复位髓内针内固定术;胸腔闭式引流术;肺功能测定;呼吸机治疗[大于等于96小时]
330	H14呼吸内科	2024-03-12	2024-03-23	3485816	金成宣	男	82Y	肺部感染	下肢静脉血栓形成;肝功能不全;高血压性心脏病;阵发性心房颤动;脑梗死;骨折治疗后恢复期;脂肪肝;肝囊肿;后天性肾囊肿;肾结石	好转	吴立琴	金芬华	俞丽华
331	H14呼吸内科	2024-04-11	2024-04-30	3497534	方陈红	女	72Y	股骨颈骨折	胸腔积液;支气管哮喘;肺部感染;颈动脉硬化;下肢动脉粥样硬化;下肢静脉血栓形成;高血压;特发性血小板增多症;轻度贫血	治愈	夏晓东	邱章伟	徐慧	人工股骨头置换术;髋轴面，陶瓷与聚乙烯
332	H14呼吸内科	2024-04-10	2024-04-30	3497742	陈秋芽	女	81Y	股骨粗隆间骨折	慢性阻塞性肺病;Ⅱ型呼吸衰竭;肺部感染;胸腔积液;肺肿物;过敏性皮炎;高血压2级;2型糖尿病;下肢静脉肌间血栓形成;下肢动脉粥样硬化;多发性肝囊肿;后天性肾囊肿	好转	林洁2	林洁2	王道会	股骨骨折闭合复位髓内针内固定术;无创呼吸机辅助通气(双水平气道正压[BiPAP])
333	H14介入/消化内科二	2024-06-12	2024-07-30	3527286	杨小华	男	61Y	肝恶性肿瘤	肝脓肿;脑梗死;大隐静脉曲张;腹腔淋巴结继发恶性肿瘤;慢性乙型病毒性肝炎;腹水;低蛋白血症;贫血;慢性胃炎;食管裂孔疝;血栓性静脉炎;反流性食管炎;陈旧性肋骨骨折;退行性主动脉瓣疾患;二尖瓣反流;胸腔积液;后天性肾囊肿	好转	姚红响	姚红响	张衡以挺	经导管肝动脉栓塞术;肝动脉造影;化疗药物灌注;大隐静脉高位结扎和剥脱术;小隐静脉高位结扎和剥脱术;下肢静脉剥脱术;肝脓肿穿刺引流术;肝脓肿穿刺引流术;经皮肝穿刺胆管引流术
334	H14介入/消化内科二	2024-12-03	2024-12-12	3579242	吴美英	女	86Y	胆总管结石	急性胰腺炎;急性心肌梗死;心功能不全;呼吸衰竭;心房颤动;肥厚性心肌病;十二指肠憩室;脂肪肝;肾结石;后天性肾囊肿;肋骨多处骨折;肺诊断性影像检查的异常所见;下肢动脉粥样硬化;下肢静脉血栓形成;高血压;2型糖尿病;胆囊切除术后状态	好转	朱雄	申苏建	应晴吉	内镜逆行胰胆管造影[ERCP];内镜逆行胰胆管造影[ERCP];内镜逆行胰胆管造影[ERCP]
335	H14介入/消化内科二	2024-12-23	2024-12-26	3584830	吴洪钗	女	85Y	急性阑尾炎	胸椎压缩性骨折;胸椎间盘突出;十二指肠憩室;多发性肝囊肿;心包积液;下肢动脉粥样硬化;下肢静脉肌间血栓形成	治愈	林李淼	夏盛隆	夏盛隆
336	H14介入/消化内科二	2024-12-18	2024-12-28	3585439	杨建臣	男	73Y	消化道出血	十二指肠球部溃疡;慢性胃炎;食管炎;肺部感染;局灶性大脑挫裂伤;创伤性蛛网膜下出血;颞骨骨折;骨盆骨折;肩关节脱位;骶骨骨折;创伤性皮下气肿;低蛋白血症;下肢静脉血栓形成;甲状腺结节;肝囊肿;后天性肾囊肿;脊柱侧弯;多发性脑梗死;老年性脑萎缩;运动障碍;功能性吞咽困难	治愈	朱雄	申苏建	应晴吉	胃镜检查;结肠镜检查
337	H15消化内科	2023-12-25	2024-01-07	3467993	林阿花	女	91Y	消化道出血	慢性肾功能不全;高钾血症;泌尿道感染;特发性(原发性)高血压;肺诊断性影像异常;下肢静脉血栓形成;胸腔积液;动脉硬化;甲状腺结节;后天性肾囊肿;骨折治疗后恢复期	好转	蒋益	郑波	林道泼
338	H15消化内科	2024-01-05	2024-01-20	3474709	林志翔	男	68Y	食管恶性肿瘤	消化道出血;失血性休克;恶性肿瘤维持性化学治疗;肺栓塞;下肢深静脉血栓形成;粒细胞缺乏;肺部感染;后天性肾囊肿;肝囊肿;陈旧性肋骨骨折;腰骶椎间盘突出	死亡	王文星	胡定元	杨守醒	静脉注射化疗药物
339	H15消化内科	2024-06-04	2024-06-19	3512715	王崇月	女	77Y	糜烂性胃炎	食管裂孔疝;肝囊肿;骨质疏松;下肢动脉粥样硬化;下肢静脉血栓形成;哮喘;肺气肿;特发性(原发性)高血压;腰椎退行性病变;腰椎间盘突出;胸椎压缩性骨折;胸椎术后;颈椎术后	好转	徐昌隆	夏盛隆	叶梦思	胃镜检查
340	H15消化内科	2024-08-23	2024-09-05	3541342	叶银娣	女	82Y	胃溃疡	静脉血栓形成;下肢静脉血栓形成;胃息肉;十二指肠球部息肉;高血压;肋骨多处骨折;多发性脑梗死;甲状腺结节;心脏扩大;颈动脉硬化	好转	蔡振寨	林李淼	夏盛隆	胃镜检查
341	H16血液内科	2024-01-08	2024-01-15	3471826	魏君印	男	66Y	药物性血小板减少症	脊髓损伤;创伤性截瘫;神经源性膀胱;神经源性肠;特定性运动功能发育障碍;特发性(原发性)高血压;下肢动脉粥样硬化;下肢静脉血栓形成;脂肪肝;腰骶横突骨折;坐骨骨折;肋骨多处骨折;胫骨平台骨折;股骨内髁骨折;膝半月板撕裂;陈旧性膝关节韧带损伤;膝关节病	好转	林颖	林颖	周晓海	骨髓穿刺术
342	H16血液内科	2024-04-16	2024-04-18	3493882	高延近	男	64Y	恶性肿瘤维持性化学治疗	肺恶性肿瘤;多部位淋巴结继发恶性肿瘤;骨继发恶性肿瘤;慢性顽固性疼痛;腰椎骨折;下肢动脉粥样硬化;下肢静脉血栓形成	好转	林颖	林颖	黄樾樾	静脉注射化疗药物
343	H16血液内科	2024-04-19	2024-04-22	3494975	高延近	男	64Y	全身性广泛继发恶性肿瘤	肺恶性肿瘤;多部位淋巴结继发恶性肿瘤;骨继发恶性肿瘤;慢性顽固性疼痛;药物性发热;腰椎压缩性骨折;下肢动脉粥样硬化;下肢静脉血栓形成	好转	林颖	林颖	黄樾樾
344	H16血液内科	2024-05-07	2024-05-11	3500439	高延近	男	64Y	恶性肿瘤维持性化学治疗	肺恶性肿瘤;全身性广泛继发恶性肿瘤;淋巴结继发恶性肿瘤;骨继发恶性肿瘤;胸椎压缩性骨折;下肢动脉粥样硬化;下肢静脉血栓形成;疼痛	好转	林颖	黄河2	黄河2	静脉注射化疗药物;静脉注射免疫制剂治疗
345	H16血液内科	2024-06-19	2024-06-24	3514600	高延近	男	64Y	恶性肿瘤维持性化学治疗	全身性广泛继发恶性肿瘤;肺恶性肿瘤;淋巴结继发恶性肿瘤;骨继发恶性肿瘤;慢性顽固性疼痛;腰椎压缩性骨折;下肢动脉粥样硬化;下腔静脉血栓形成;窦性心动过缓	好转	林颖	黄河2	方玮玥	静脉注射化疗药物
346	H16血液内科	2024-09-11	2024-09-18	3546110	朱娟娟	女	77Y	缺铁性贫血	地中海贫血;特发性(原发性)高血压;阿尔茨海默病(老年型);骨质疏松;下肢静脉血栓形成;食管裂孔疝;糜烂性胃炎;脑梗死后遗症;胸椎骨折;陈旧性腰椎骨折;骨折术后;胸椎退行性病变;腰椎间盘突出;肝囊肿;后天性肾囊肿;颈动脉硬化;下肢动脉粥样硬化;腰椎退行性病变;下肢静脉血栓形成	好转	郭文坚	孙妮	孙妮	胃镜检查;结肠镜检查
347	K02康复	2023-12-25	2024-01-12	3470668	王芊芊	女	43Y	关节僵硬	髋关节脱位;髋臼骨折;骨折术后恢复期;股骨头骨折;股骨远端骨折;寰椎骨折;胸椎棘突骨折;锁骨骨折;下肢静脉肌间血栓形成;物理治疗	好转	蒋松鹤	林海燕2	林乐2
348	K02康复	2023-12-24	2024-01-14	3471502	陈桂松	男	47Y	腰骶神经根损害	骨折术后恢复期;骶骨骨折;耻骨骨折;物理治疗;臂丛神经损伤;副神经损伤;颅底骨折;脑挫伤;寰椎骨折;寰枢椎半脱位;胸椎骨折T5/T6;下肢静脉肌间血栓形成;腰椎间盘突出;高血压;肝功能检查的异常结果;高脂血症;高尿酸血症	好转	蒋松鹤	林海燕2	林乐2
349	K06康复	2023-12-04	2024-01-03	3466418	万凤迪	女	74Y	颈部脊髓损伤	创伤性截瘫;物理治疗;第二颈椎骨折;寰枢椎半脱位;胸椎压缩性骨折;胸椎骨折;腰椎前移;腰椎间盘突出;脊椎退行性病变;肋骨多处骨折;胆囊息肉;下肢静脉肌间血栓形成;下肢动脉粥样硬化;泌尿道感染;肺部感染	好转	蒋松鹤	卢君艳	林心心
350	K06康复	2023-12-05	2024-01-03	3466500	孙大尧	男	56Y	脊髓损伤	运动障碍;皮肤感觉障碍;耻骨骨折;胸椎骨折;腰椎术后;物理治疗;肋骨多处骨折;腰骶椎间盘突出;胸腔积液;创伤性尿道断裂;贫血;创伤性会阴血肿;下肢静脉肌间血栓形成;多发性肝囊肿;后天性肾囊肿;肾结石	好转	蒋松鹤	卢君艳	程博	膀胱造口导管置换
351	K06康复	2023-12-04	2024-01-03	3466521	王爱玉	女	69Y	脊髓损伤	运动障碍;物理治疗;胸椎术后;骨折术后;陈旧性肩胛骨骨折;肋骨多处骨折;陈旧性耻骨骨折;下肢静脉肌间血栓形成;腔隙性脑梗死;膝关节后十字韧带损伤;腰椎术后;膝外侧半月板损伤;膝内侧半月板损伤	好转	蒋松鹤	卢君艳	程博
352	K06康复	2023-12-17	2024-01-08	3468834	魏君印	男	66Y	脊髓损伤	创伤性截瘫;脊髓病性膀胱;神经源性肠;物理治疗;腰椎术后;腰椎骨折L2;坐骨骨折;肋骨骨折;下肢静脉肌间血栓形成;胫骨平台骨折;股骨内髁骨折;膝内侧半月板损伤;膝关节十字韧带损伤;原发性单侧膝关节病;高血压;血小板减少;膝关节副韧带损伤	好转	蒋松鹤	卢君艳	林心心
353	K06康复	2024-01-02	2024-01-10	3469600	陈小云	女	61Y	膝关节创伤性关节病	膝关节痛;胫骨平台骨折;骨质疏松;乙型病毒性肝炎;高血压;下肢静脉肌间血栓形成;下肢静脉曲张;物理治疗	好转	蒋松鹤	郑余银	邹恩苗
354	K06康复	2024-01-07	2024-01-11	3470371	庄克港	男	56Y	颈部脊髓损伤	创伤性截瘫;物理治疗;颈椎术后;颈椎间盘突出;颈椎前移;髌骨骨折;腰椎骨折;第一肋骨骨折;下肢动脉粥样硬化;下肢静脉肌间血栓形成;创伤性湿肺;慢性乙型病毒性肝炎	好转	蒋松鹤	卢君艳	林心心
355	K06康复	2023-12-20	2024-01-14	3471495	洪延松	男	52Y	马尾损伤	室上性心动过速;泌尿道感染;髋臼骨折;耻骨骨折;物理治疗;腰椎术后;骨折术后恢复期;髂骨骨折;跟骨骨折;胆囊结石;肝囊肿;下肢静脉肌间血栓形成	好转	蒋松鹤	卢君艳	程博
356	K06康复	2024-01-04	2024-01-15	3471890	王爱玉	女	69Y	脊髓损伤	创伤性截瘫;物理治疗;胸椎术后;陈旧性肩胛骨骨折;肋骨骨折;陈旧性耻骨骨折;膝内侧半月板损伤;下肢静脉肌间血栓形成;腔隙性脑梗死;原发性单侧膝关节病;高脂血症;高尿酸血症;腰椎术后;骨折术后;膝关节后十字韧带损伤;下肢动脉粥样硬化;股总动脉狭窄;胫前动脉狭窄	好转	蒋松鹤	卢君艳	程博
357	K06康复	2024-01-07	2024-01-15	3471907	叶荣香	女	87Y	髋关节置换术后疼痛	股骨颈骨折;下肢静脉血栓形成;静脉石;高血压;2型糖尿病;骨质疏松伴有病理性骨折;下肢静脉肌间血栓形成;物理治疗	好转	蒋松鹤	郑余银	邹恩苗
358	K06康复	2023-12-17	2024-01-16	3472505	李细香	女	54Y	膝关节痛	胫骨平台伴腓骨骨折;物理治疗;大腿挫伤;股神经损伤;闭孔神经损伤;膝半月板撕裂;膝关节副韧带损伤;原发性单侧膝关节病;膝关节积液;下肢静脉肌间血栓形成;2型糖尿病;后天性肾囊肿;拇趾骨折;腓肠神经损伤;肋骨骨折;腰椎间盘突出;瘢痕粘连;膝的其他和未特指部位的扭伤和劳损	好转	蒋松鹤	郑余银	高丽萍
359	K06康复	2023-12-27	2024-01-16	3472516	谢世业	男	53Y	颈部脊髓损伤	颈椎术后;骨折术后恢复期;桡骨远端骨折;三角骨骨折;骶骨骨折;趾骨骨折;颈椎间盘突出;腰椎间盘突出;脊椎退行性病变;足挫伤;胸腔积液;受压区压疮;泌尿道感染;下肢深静脉血栓形成;创伤性截瘫;皮肤感觉障碍;运动障碍;物理治疗	好转	蒋松鹤	卢君艳	程博
360	K06康复	2023-12-31	2024-01-16	3472555	张朝兴	男	69Y	肩关节痛	骨折术后恢复期;创伤性蛛网膜下出血;创伤性硬脑膜下积液;锁骨下动脉粥样硬化;下肢动脉粥样硬化;颈动脉瘤;乙肝表面抗原携带者;前列腺增生;前列腺结石;下肢静脉肌间血栓形成;物理治疗	好转	蒋松鹤	郑余银	邹恩苗
361	K06康复	2023-12-23	2024-01-17	3473182	林丙忠	男	71Y	膝关节痛	骨折术后恢复期;膝关节内侧副韧带损伤;腓骨骨折;髌骨骨折;大腿挫伤;膝内侧半月板损伤;膝关节积液;主动脉瓣关闭不全;下肢静脉肌间血栓形成;头皮血肿;胸腔积液;肺占位性病变;陈旧性肺结核;胆囊结石;脂肪肝;前列腺结石;退行性主动脉瓣疾患;下肢动脉粥样硬化;心功能不全	好转	蒋松鹤	郑余银	高丽萍
362	K06康复	2024-01-08	2024-01-20	3474620	金洪钗	女	70Y	耻骨骨折	骨折术后恢复期;胸椎骨折T11/T12;脑挫伤;创伤性蛛网膜下腔出血;硬脑膜下积液;腔隙性脑梗死;肋骨骨折;胸腔积液;胸腔闭式引流术后;2型糖尿病;下肢静脉肌间血栓形成;颈椎病;低钾血症;急性肠炎;泌尿道感染	好转	蒋松鹤	郑余银	邹恩苗
363	K06康复	2024-01-10	2024-01-22	3475839	陈春兰	女	60Y	膝关节置换术后疼痛	左室扩大;退行性主动脉瓣疾患;二尖瓣反流;脂肪肝;下肢静脉肌间血栓形成;主动脉瓣关闭不全;心功能不全;涉及使用其他康复操作的医疗;膝关节滑膜炎;趾骨骨折;2型糖尿病;甲状腺功能减退症;甲状腺术后	好转	蒋松鹤	郑余银	邹恩苗
364	K06康复	2024-01-04	2024-01-22	3475842	万凤迪	女	75Y	颈部脊髓损伤	创伤性截瘫;物理治疗;第二颈椎骨折;寰枕关节半脱位;胸椎术后;骨折术后恢复期;椎间盘移位，其他特指的;腰椎间盘突出;脊椎退行性病变;肋骨多处骨折;胆囊息肉;下肢静脉肌间血栓形成;下肢动脉粥样硬化;创伤后伤口感染	好转	蒋松鹤	卢君艳	林心心
365	K06康复	2023-12-27	2024-01-22	3476203	叶爱梅	女	52Y	胸部脊髓损伤	创伤性截瘫;神经源性肠;脊髓病性膀胱;物理治疗;骨折术后恢复期;骨盆骨折;胸椎术后;骶髂关节脱位;肋骨骨折;脊柱骨折;骶骨区挫伤;腰椎间盘突出;胸腔积液;心包积液;后天性肾囊肿;下肢静脉肌间血栓形成;泌尿道感染	好转	蒋松鹤	卢君艳	林心心
366	K06康复	2024-01-19	2024-02-18	3480045	洪延松	男	52Y	马尾损伤	腰椎术后;骨折术后恢复期;髂骨骨折;跟骨骨折;下肢静脉肌间血栓形成;室上性心动过速;胆囊结石;肝囊肿;胆总管扩张;髋臼骨折;耻骨骨折;跟骨骨折;物理治疗	好转	蒋松鹤	卢君艳	程博
367	K06康复	2024-01-08	2024-02-20	3480220	孙大尧	男	56Y	脊髓损伤	创伤性截瘫;骨折术后恢复期;物理治疗;肋骨多处骨折;耻骨骨折;创伤性尿道断裂;膀胱造口状态;腰椎间盘突出;肝囊肿;后天性肾囊肿;肾结石;下肢静脉肌间血栓形成;创伤性会阴血肿;手术后切口感染;腰椎术后	好转	蒋松鹤	卢君艳	程博
368	K06康复	2024-01-22	2024-02-24	3480592	詹建銮	男	62Y	创伤性蛛网膜下腔出血	脑挫伤;创伤性硬脑膜下积液;额骨骨折;筛窦骨折;颅脑外伤所致精神障碍;上颌骨骨折;排尿困难;骨折术后恢复期;髌骨骨折;肋骨多处骨折;创伤性胸腔积液;颈椎骨折;鼻骨骨折;下肢静脉肌间血栓形成;脂肪肝;后天性肾囊肿;肝囊肿;肺诊断性影像异常;认知障碍;高血压	好转	屠文展	屠文展	李慧芳
369	K06康复	2024-02-21	2024-03-14	3483812	李细花	女	71Y	关节痛	骨盆骨折;跖骨骨折;物理治疗;尺骨桡骨闭合性骨折;下肢静脉肌间血栓形成;下肢动脉粥样硬化;肥厚性心肌病;肺诊断性影像异常;骨质疏松;腰椎退行性病变	好转	蒋松鹤	郑余银	高丽萍
370	K06康复	2024-02-18	2024-03-17	3484502	洪延松	男	52Y	马尾损伤	腰椎术后;骨折术后恢复期;髂骨骨折;物理治疗;跟骨骨折;胆囊结石;肝囊肿;下肢静脉肌间血栓形成;室上性心动过速;胆总管扩张;腰椎骨质增生	好转	蒋松鹤	卢君艳	林心心
371	K06康复	2024-03-11	2024-03-19	3485119	卜维春	男	40Y	膝关节僵硬	股骨下端骨折;胫骨平台骨折;物理治疗;股骨内髁骨折;膝关节后十字韧带损伤;膝关节外侧副韧带损伤;骨折术后恢复期;楔状骨骨折(足);桡骨远端骨折;掌骨基底骨折;拇指近节骨折;髂骨骨折;耻骨骨折;肋骨多处骨折;脊柱裂;肺部感染;肾上腺血肿;高脂血症;下肢静脉血栓形成	好转	蒋松鹤	郑余银	高丽萍
372	K06康复	2024-02-25	2024-03-26	3486830	周玉章	男	73Y	髋关节僵硬	骨折术后恢复期;腰椎骨折L3;髋臼骨折;2型糖尿病;冠状动脉粥样硬化性心脏病;高脂血症;老年性脑萎缩;多发性脑梗死;肝囊肿;肾结石;下肢静脉血栓形成;下肢动脉粥样硬化;下肢神经的损伤;正中神经的其他损害;室性期前收缩;冠状动脉支架植入后状态;高血压;物理治疗	好转	蒋松鹤	郑余银	邹恩苗
373	K06康复	2024-02-20	2024-03-26	3486877	孙大尧	男	56Y	胸部脊髓损伤	创伤性截瘫;物理治疗;腰椎术后;骨折术后恢复期;胸椎骨折T11/T12;肋骨多处骨折;腰椎间盘突出;创伤性尿道断裂;耻骨骨折;多发性肝囊肿;后天性肾囊肿;泌尿道感染;下肢静脉肌间血栓形成;创伤性尿道断裂;膀胱术后	好转	蒋松鹤	卢君艳	林心心
374	K06康复	2024-03-17	2024-03-27	3487020	洪延松	男	52Y	马尾损伤	腰椎术后;骨折术后恢复期;物理治疗;髂骨骨折;跟骨骨折;胆囊结石;肝囊肿;下肢静脉肌间血栓形成;室上性心动过速;胆总管扩张;腰椎骨质增生;髋臼骨折;耻骨骨折	好转	蒋松鹤	卢君艳	林心心
375	K06康复	2024-03-16	2024-04-15	3492915	郑元杰	男	39Y	胸部脊髓损伤	骨折术后恢复期;腰椎间盘突出;下肢静脉肌间血栓形成;泌尿道感染;创伤性截瘫;脊髓病性膀胱;神经源性肠;物理治疗，其他的;腰椎术后	好转	蒋松鹤	卢君艳	程博
376	K06康复	2024-03-26	2024-04-25	3496238	陈良香	女	64Y	入脑前动脉的闭塞或狭窄引起的脑梗死	运动障碍;吞咽困难;认知障碍;言语障碍;物理治疗，其他的;高血压;2型糖尿病;低钾血症;心房颤动;腰椎术后;胆囊结石;陈旧性肋骨骨折;全组鼻窦炎;下肢静脉肌间血栓形成;下肢动脉粥样硬化	好转	屠文展	屠文展	陈文斯	认知功能评定;运动训练;针灸
377	K06康复	2024-03-26	2024-04-28	3496939	杨中浩	男	25Y	马尾损伤	运动障碍;神经源性膀胱;神经源性肠;腰椎骨折;骶骨骨折;骨盆骨折;骨折术后恢复期;跖骨骨折;足舟状骨骨折;骰骨骨折;肋骨骨折;下肢静脉肌间血栓形成;精神分裂症;泌尿道感染	好转	蒋松鹤	卢君艳	林心心
378	K06康复	2024-03-26	2024-05-01	3497962	孙大尧	男	56Y	脊髓损伤	创伤性截瘫;物理治疗，其他的;腰椎术后;脊柱骨折;耻骨骨折;肋骨多处骨折;腰骶椎间盘突出;创伤性尿道断裂;多发性肝囊肿;后天性肾囊肿;下肢静脉肌间血栓形成;肩关节僵硬	好转	蒋松鹤	卢君艳	林心心	关节穿刺术
379	K203综合康复	2024-12-25	2024-12-30	3586003	陈兰花	女	67Y	运动障碍	开放性脑挫伤;脑外伤恢复期;涉及使用康复操作的医疗;后天性颅骨缺损;硬脑膜下积液;枕骨骨折;高血压;糖尿病;甲状腺术后;下肢静脉肌间血栓形成;下肢动脉粥样硬化;胆囊结石;骨折术后	治愈	蒋松鹤	卢君艳	林乐2	运动训练;电针治疗;电动起立床训练;呼吸训练
380	L103呼吸/风湿免疫	2024-11-14	2024-11-24	3571678	周建平	男	55Y	急性肺血栓栓塞症	肺部感染;陈旧性肋骨骨折;腰椎术后	好转	林洁2	邱章伟	俞丽华
381	L103呼吸/风湿免疫	2024-12-11	2024-12-18	3581620	周志蕊	女	81Y	支气管哮喘	高血压;肺肿物;低钾血症;下肢静脉血栓形成;肾盂积水，其他的;颈动脉硬化;下肢动脉粥样硬化;多发性脑梗死;腰椎术后;陈旧性胸椎骨折;骨质疏松;腰椎间盘突出;腰椎间盘变性;肝钙化灶;胆囊结石	好转	何剑波	林慧	徐挺挺
382	L110消化内科	2024-11-02	2024-11-21	3570961	潘开梅	女	96Y	十二指肠溃疡伴出血	慢性萎缩性胃炎;幽门螺旋杆菌感染;抗利尿激素不恰当分泌综合征;低钠血症;肺部感染;肥厚型梗阻性心肌病;下肢静脉肌间血栓形成;下肢动脉粥样硬化;动脉的动脉粥样硬化，其他的;肝硬化;脾大;胆囊结石;后天性肾囊肿;老年性脑萎缩;硬脑膜下积液;肋骨骨折;胸椎压缩性骨折;小脑出血	好转	蒋益	邵晓晓	林道泼	胃镜检查
383	L208神经外科	2024-09-13	2024-11-17	3568882	程玉香	女	76Y	额叶出血	脑疝;脑软化灶;肺肿物;肺部感染;血糖过多;肋骨骨折;肩关节脱位;多发性肝囊肿;老年性心脏病;下肢动脉粥样硬化;下肢静脉血栓形成	好转	张弩	周辉	卢相琦	颅骨去骨瓣减压术;脑内血肿清除术;呼吸机治疗[大于等于96小时]
384	L208神经外科	2024-08-10	2024-11-26	3572731	徐家存	男	72Y	创伤性硬脑膜下血肿	创伤性硬脑膜外血肿;创伤性蛛网膜下腔出血;脑挫伤;肺部感染;胸骨骨折;胸椎压缩性骨折;肺挫伤;胸腔积液;后天性肾囊肿;下腔静脉血栓形成;意识丧失	治愈	张弩	周辉	卢相琦	脑膜切开伴硬脑膜下腔血肿清除术;呼吸机治疗[大于等于96小时];永久性气管切开术
385	L208神经外科	2024-10-14	2024-12-02	3575122	黄文香	女	66Y	多发性大脑挫裂伤	创伤性蛛网膜下腔出血;颧弓骨折;头皮血肿;锁骨骨折;肺部感染;胸腔积液;高血压;2型糖尿病;下肢静脉血栓形成;子宫切除术后状态	好转	张弩	周辉	俞丽生	锁骨人工骨植骨术;锁骨骨折切开复位钢板内固定术
386	L208神经外科	2024-11-20	2024-12-23	3583438	林宝玉	女	81Y	丘脑出血	陈旧性肋骨骨折;特发性(原发性)高血压;2型糖尿病;低蛋白血症;贫血;胆囊结石;肾结石;腹腔积液;胸腔积液;肺部感染;胃恶性肿瘤;颈椎术后;下肢静脉肌间血栓形成	好转	张弩	周辉	俞丽生
387	N15心血管内科	2024-06-10	2024-06-29	3515656	叶春兰	女	96Y	急性前壁心肌梗死	心源性休克;急性心包积液;心功能IV级(NYHA分级);高血压;肺部感染;阵发性心房颤动;肝占位性病变;急性肾功能不全;下肢动脉粥样硬化;肝恶性肿瘤;胃食管反流;具有心脏起搏器;下肢静脉血栓形成;低蛋白血症;肝血管瘤;肝囊肿;胆囊结石;骨折术后	死亡	林丛	潘嘉林	陈晔	气管内插管
388	N16心血管内科	2024-08-17	2024-08-28	3538332	宋金娥	女	70Y	肺栓塞	心功能III级(NYHA分级);心房颤动;髂动脉血栓形成;肺部感染;2型糖尿病;高血压;脑梗死后遗症;下肢动脉粥样硬化;肺诊断性影像检查的异常所见;陈旧性肋骨骨折;肝功能不全	好转	王艳	李进	郑程
389	N16心血管内科	2024-11-17	2024-11-24	3571791	马玉英	女	82Y	老年性心脏病	心房颤动;退行性主动脉瓣疾患;二尖瓣主动脉瓣及三尖瓣关闭不全;心功能Ⅲ级;颈动脉硬化;股动脉粥样硬化;下肢静脉肌间血栓形成;肾结石;骨折术后;脂肪肝;子宫腔积液	好转	李岳春	潘样岐	潘样岐
390	N17心血管内科	2024-01-01	2024-01-10	3469568	李玉领	女	84Y	冠状动脉粥样硬化	室上性心动过速;老年性心脏瓣膜病;主动脉瓣疾患，其他的;主动脉(瓣)关闭不全;二尖瓣退行性变;骨折术后;骨质疏松;动脉粥样硬化;手术后恢复期;肺动脉高压;下肢静脉血栓形成	好转	李继武	陈徐亮	谢尚合	多根导管冠状动脉造影
391	N17心血管内科	2024-06-04	2024-06-11	3510007	黄英英	女	81Y	冠状动脉粥样硬化性心脏病	颈动脉硬化;锁骨下动脉粥样硬化;2型糖尿病;高尿酸血症;桡动脉狭窄;下肢静脉血栓形成;陈旧性肋骨骨折;脂肪肝;上肢动脉粥样硬化;下肢动脉粥样硬化;手术后状态，其他特指的	好转	李嘉	金戈	王存存	药物洗脱冠状动脉支架置入;多根导管冠状动脉造影;冠状动脉血管内超声(IVUS);单根血管操作;经皮冠状动脉球囊扩张成形术;置入一根血管的支架
392	N17心血管内科	2024-07-12	2024-07-14	3521061	叶启菊	女	85Y	冠状动脉粥样硬化	窦性心动过缓;特发性(原发性)高血压;老年性心脏瓣膜病;二尖瓣反流;退行性主动脉瓣疾患;主动脉(瓣)关闭不全;颈动脉硬化;下肢动脉粥样硬化;慢性胃炎;肋骨骨折;后天性肾囊肿;肺诊断性影像异常;下肢静脉血栓形成	好转	李继武	李继武	谢尚合	多根导管冠状动脉造影
393	N17心血管内科	2024-10-15	2024-10-19	3557197	王德楷	男	66Y	冠状动脉粥样硬化性心脏病	骨折术后;下肢深静脉血栓形成;贫血;肺肿物;肺气肿合并肺大泡;颈动脉硬化;脂肪肝;肝囊肿;前列腺结石;手术后状态，其他特指的	好转	李嘉	金戈	王金生	多根导管冠状动脉造影
394	O106创伤骨科	2024-11-14	2024-11-23	3571272	南阿花	女	101Y	股骨粗隆间骨折	下肢静脉血栓形成;骨质疏松;炎症后肺纤维化;肺动脉高压;心包积液;肝回声不均;肾盂积水;心功能不全;房性期前收缩[房性早搏]	治愈	孔建中	余贤斌	余贤斌	股骨骨折闭合性复位术伴内固定;股骨颈/股骨转子间骨折手法整复术;股静脉穿刺术;下腔静脉滤器置入术;筋膜成形术
395	O106创伤骨科	2024-11-12	2024-12-02	3575029	陈国存	男	51Y	多发性骨盆骨折	骶骨骨折;耻骨分支骨折;股骨粗隆下骨折;尺骨鹰嘴骨折;肋骨多处骨折;肩胛骨颈和肩关节盂骨折;肾结石;肝钙化灶;老年性心脏病;下肢静脉血栓形成;低蛋白血症;高胆红素血症;胸腔积液;I型呼吸衰竭;胆汁淤积症;肺挫伤	治愈	水小龙	水小龙	陈春慧	股骨骨折切开复位髓内针内固定术;骨盆骨折切开复位螺钉内固定术;尺骨骨折切开复位钢板内固定术
396	O106创伤骨科	2024-11-30	2024-12-07	3576657	韩春香	女	75Y	肩关节脱位	肱骨头骨折;下肢静脉血栓形成;肝回声不均;肝囊肿;后天性肾囊肿;肾结石;糖尿病;退行性主动脉瓣疾患;骨折术后	治愈	水小龙	水小龙	陈春慧	肩关节脱位切开复位内固定术
397	O106创伤骨科	2024-11-27	2024-12-07	3576800	王许密	女	60Y	跖骨骨折	下肢静脉血栓形成;脂肪肝;清创术后	好转	冯永增	冯永增	徐宏威	跖骨骨折切开复位钢板内固定术
398	O106创伤骨科	2024-12-05	2024-12-14	3579647	应王翠	女	96Y	股骨粗隆间骨折	高血压;肺部感染;肺气肿;肺诊断性影像检查的异常所见;陈旧性肋骨骨折;骨质疏松;脂肪肝;主动脉钙化;冠状循环诊断性影像检查异常所见;主动脉瓣钙化;二尖瓣钙化;胆汁淤积症;后天性肾囊肿;膀胱憩室;下肢静脉血栓形成	治愈	陈龙	应晓洲	应晓洲	股骨骨折闭合复位髓内针内固定术
399	O106创伤骨科	2024-12-07	2024-12-16	3580426	诸世娒	男	69Y	膝关节前十字韧带完全断裂	膝外侧半月板撕裂;膝内侧半月板损伤;胫骨平台骨折;膝关节内侧副韧带损伤;膝关节外侧副韧带损伤;肝回声不均;肝囊肿;后天性肾囊肿;前列腺增生;前列腺结石;心功能不全;下肢静脉血栓形成;下肢静脉曲张	好转	孔建中	陈墨川	陈墨川	关节镜膝关节前交叉韧带重建术;异体肌腱移植术;膝关节镜下半月板成形术;关节镜膝关节副韧带修补术
400	O106创伤骨科	2024-12-21	2024-12-28	3585083	陈阿碎	女	87Y	肱骨大结节骨折	肩关节脱位;特发性(原发性)高血压;膝关节退行性病变;肺肿物;甲状腺钙化;心功能不全;脂肪肝;胆囊结石;后天性肾囊肿;下肢静脉血栓形成;主动脉瓣关闭不全	好转	翁益民	翁益民	蔡乐益	肱骨骨折闭合复位术;肩脱位闭合性复位术;石膏托固定术
401	O106创伤骨科	2024-12-24	2024-12-31	3586560	程年香	女	76Y	股骨粗隆间骨折	二尖瓣及主动脉瓣关闭不全;肺肿物;下肢静脉血栓形成	好转	孔建中	陈墨川	陈墨川	股骨骨折闭合复位螺钉内固定术;股骨人工骨植骨术;筋膜成形术
402	O107创伤骨科	2024-05-13	2024-05-25	3504475	鲁世汉	男	78Y	胫骨骨折累及踝关节	踝关节脱位;多处挫伤;肺气肿;支气管扩张伴感染;下肢静脉血栓形成	治愈	汤骏	汤骏	吴剑彬	踝关节骨折切开复位钢板内固定术;踝关节修补术
403	O107创伤骨科	2024-05-20	2024-06-23	3514030	陈茶元	女	73Y	取除骨折内固定装置	髋关节置换术后;下肢静脉血栓形成;老年性心脏瓣膜病;内部关节假体引起的感染和炎症性反应	其他	杨雷	方文来	方文来	股骨内固定装置去除术;皮肤和皮下坏死组织切除清创术
404	O107创伤骨科	2024-07-01	2024-07-10	3519609	金崇伦	男	67Y	趾骨骨折	创伤后伤口感染，不可归类在他处者;肺大疱;下肢动脉粥样硬化;下肢静脉血栓形成	治愈	汤骏	汤骏	吴剑彬
405	O107创伤骨科	2024-07-24	2024-08-02	3528186	吴在朋	女	57Y	髌骨骨折	下肢深静脉血栓形成;脂肪肝;肝回声不均;肝血管瘤	好转	杨雷	方文来	谢忠杰	髌骨骨折切开复位张力带钢丝内固定术;关节软骨修复术;关节病损的其他局部切除术或破坏术
406	O107创伤骨科	2024-07-27	2024-08-06	3529636	叶佩玉	女	66Y	胫骨平台骨折	跖骨骨折;下肢静脉肌间血栓形成;脂肪肝;后天性肾囊肿;心功能不全	治愈	陈龙	陈龙	应晓洲	胫骨骨折切开复位钢板内固定术;关节软骨修复术
407	O107创伤骨科	2024-05-17	2024-08-11	3531699	包林玉	女	73Y	胫骨平台伴腓骨骨折	髌骨骨折;高血压2级;脂肪肝;老年性心脏瓣膜病;下肢静脉肌间血栓形成	治愈	杨雷	方文来	方文来	胫骨骨折切开复位钢板内固定术;皮肤和皮下坏死组织切除清创术;胫骨内固定装置去除术;膝关节半月板成形术;胫骨植骨术;关节软骨修复术
408	O107创伤骨科	2024-08-02	2024-08-12	3531814	朱金荣	男	70Y	股骨干骨折	股骨粗隆间骨折;高血压;下肢静脉肌间血栓形成;心功能不全;脂肪肝;心房扩大;心功能不全	治愈	陈龙	陈龙	应晓洲	股骨骨折切开复位髓内针内固定术;骨移植术
409	O107创伤骨科	2024-08-13	2024-08-25	3537028	黄成华	女	64Y	胫骨平台骨折	膝关节十字韧带损伤;膝关节积液;股骨病变;下肢静脉血栓形成;膝关节退行性病变;主动脉瓣钙化;脂肪肝;胆囊病变;胆囊结石	好转	赵友明	赵友明	柯陈荣	胫骨骨折切开复位钢板内固定术;关节软骨修复术;石膏托固定术;膝关节半月板成形术
410	O107创伤骨科	2024-08-21	2024-08-28	3538231	陈崇钗	女	85Y	股骨粗隆间骨折	肺炎;支气管扩张(症);老年性肺气肿;下肢动脉粥样硬化;下肢静脉肌间血栓形成;后天性肾囊肿;心功能不全;主动脉瓣关闭不全	治愈	陈龙	陈龙	应晓洲	股骨骨折闭合复位钢针内固定术
411	O107创伤骨科	2024-07-23	2024-08-29	3538943	邵传香	女	66Y	肋骨骨折	失血性休克;创伤性湿肺;肺不张;创伤性胸腔积液;骨盆骨折;腰椎骨折;下肢深静脉血栓形成;高血压;糖尿病	治愈	杨雷	方文来	谢忠杰
412	O107创伤骨科	2024-08-16	2024-09-09	3542742	黄加准	男	40Y	胫骨平台伴腓骨骨折	腓总神经损伤;糖尿病;肝功能不全;膝关节积血;慢性肝病;下肢静脉肌间血栓形成;后天性肾囊肿	治愈	杨雷	应晓洲	谢忠杰	胫骨骨折切开复位钢板内固定术;距骨骨折闭合复位术;胫骨植骨术;胫骨植骨术;关节软骨修复术;膝关节的其他修补术;膝关节镜下半月板缝合术
413	O107创伤骨科	2024-10-07	2024-10-16	3556139	陈丽珍	女	63Y	胫骨平台骨折	双踝骨折;关节炎;脂肪肝;肝囊肿;下肢动脉粥样硬化;下肢静脉肌间血栓形成	治愈	陈龙	陈龙	白炳力	胫骨骨折切开复位钢板内固定术;关节软骨修复术
414	O107创伤骨科	2024-10-10	2024-10-27	3560805	涂喜木	男	71Y	髂骨骨折	骶髂关节脱位;耻骨联合脱位;腹腔积血;腹壁挫伤;失血性休克;下肢静脉肌间血栓形成;肾结石	治愈	冯永增	冯永增	汤嘉豪	髋关节脱位切开复位内固定术;髂动脉栓塞术;骨盆骨折闭合性复位术
415	O107创伤骨科	2024-10-18	2024-10-27	3560849	潘锦龙	男	75Y	外踝骨折	踝关节脱位;高血压;下肢深静脉血栓形成;下肢动脉粥样硬化;主动脉瓣疾患;脂肪肝;肝囊肿;前列腺增生;前列腺结石	治愈	赵友明	方文来	方文来	踝关节骨折切开复位钢板内固定术;关节软骨修复术;踝关节修补术
416	O107创伤骨科	2024-10-22	2024-11-04	3563953	黄金花	女	87Y	股骨颈骨折	下肢静脉血栓形成;特发性肺纤维化;退行性主动脉瓣疾患;脂肪肝;胆囊结石;主动脉钙化	好转	汤骏	汤骏	王贤亮	人工股骨头置换术;股静脉穿刺置管术;下肢静脉血栓切除术;髋关节滑膜切除术
417	O107创伤骨科	2024-11-15	2024-11-23	3571514	陈学钦	男	85Y	股骨粗隆间骨折	肋骨骨折;下肢静脉血栓形成;肝囊肿;后天性肾囊肿;前列腺增生;膀胱憩室;肺气肿	治愈	陈龙	陈龙	白炳力	股骨骨折闭合复位钢针内固定术;石膏绷带固定
418	O107创伤骨科	2024-11-20	2024-11-26	3572637	李连根	女	73Y	胸椎压缩性骨折	下肢静脉血栓形成;肝囊肿;肺诊断性影像异常;主动脉瓣关闭不全	好转	赵友明	方文来	方文来	胸椎骨折球囊扩张成形术
419	O107创伤骨科	2024-11-30	2024-12-10	3578043	林春香	女	89Y	股骨粗隆间骨折	肺诊断性影像异常;肺动脉高压;下肢静脉血栓形成	治愈	陈龙	应晓洲	应晓洲	股骨骨折闭合复位髓内针内固定术
420	O107创伤骨科	2024-11-30	2024-12-10	3578166	王阿玉	女	80Y	肱骨近端骨折	肩袖损伤;甲状腺结节;脂肪肝;后天性肾囊肿;肾结石;静脉血栓形成;高血压	好转	杨雷	方文来	谢忠杰	肱骨骨折切开复位钢板内固定术;肩袖修补术;关节软骨修复术
421	O107创伤骨科	2024-11-30	2024-12-11	3578767	潘秀华	女	69Y	腰椎骨折	高血压;胸椎退行性病变;后天性肾囊肿;脂肪肝;下肢动脉粥样硬化;下肢静脉血栓形成;老年性心脏病;主动脉瓣关闭不全;心功能不全	治愈	潘骏	潘骏	潘骏	腰椎骨折球囊扩张成形术
422	O107创伤骨科	2024-12-02	2024-12-14	3579588	王凤英	女	80Y	股骨粗隆间骨折	后天性肾囊肿;肺诊断性影像异常;主动脉钙化;下肢静脉血栓形成	治愈	赵友明	赵友明	胡炜	股骨骨折闭合复位髓内针内固定术
423	O107创伤骨科	2024-12-11	2024-12-21	3582305	洪春友	男	66Y	髂骨骨折	骶骨骨折;耻骨骨折;骶髂关节脱位;内踝骨折;足舟骨骨折;特发性(原发性)高血压;痛风;肝钙化灶;后天性肾囊肿;前列腺增生;下肢静脉血栓形成;主动脉钙化;前列腺结石	治愈	冯永增	冯永增	徐宏威	髂动脉栓塞术;骨盆骨折闭合复位内固定术;踝关节骨折切开复位髓内针内固定术
424	O107创伤骨科	2024-11-25	2024-12-30	3586205	林美娇	女	58Y	腰椎骨折	髋臼骨折;耻骨骨折;腰椎骨折L4;胫腓骨下端骨折;跟骨骨折;胆囊结石;下肢静脉肌间血栓形成;肋骨骨折;腰骶神经损伤;骶骨骨折;距骨骨折	好转	赵友明	赵友明	胡炜	胫骨骨折切开复位钢板内固定术;踝关节骨折切开复位钢板内固定术;腰椎骨折球囊扩张成形术;骶骨骨折切开复位内固定术;髋骨骨折切开复位螺钉内固定术;骨盆钢针内固定术;跟骨骨折切开复位钢板内固定术;跟骨植骨术;髂动脉造影
425	O107创伤骨科	2024-12-19	2024-12-31	3586584	何其红	女	46Y	胫腓骨闭合性骨折	半月板撕裂，近期的;膝关节副韧带损伤;膝的其他和未特指部位的扭伤和劳损;肺肿物;后天性肾囊肿;肝囊肿;下肢静脉血栓形成	治愈	汤骏	汤骏	汪吉棋	胫骨骨折切开复位钢板内固定术;关节软骨修复术;膝关节半月板成形术;胫骨植骨术;石膏绷带固定
426	O108创伤骨科	2024-04-30	2024-05-12	3500595	舒定西	男	70Y	股骨骨折	锁骨骨折;肋骨多处骨折;胸腔积液;肺挫伤;脑震荡;腰椎骨折;硬脑膜下积液;下肢深静脉血栓形成;前列腺结石	治愈	陈华	胡炜	胡炜	股骨骨折闭合复位髓内针内固定术;股静脉穿刺置管术
427	O108创伤骨科	2024-05-11	2024-05-15	3501756	夏建雪	女	66Y	取除骨折内固定装置	肱骨近端骨折;下肢静脉血栓形成;高血压;2型糖尿病;脂肪肝;非器质性失眠症	其他	陈华	胡炜	胡炜	肱骨内固定装置去除术
428	O108创伤骨科	2024-04-30	2024-05-22	3503747	王分田	男	69Y	胫腓骨闭合性骨折	多处挫伤;腰骶椎弓骨折;后天性肾囊肿;前列腺增生;肝回声不均;前列腺结石;肝回声不均;肝囊肿;下肢动脉粥样硬化;下肢静脉血栓形成;甲状腺结节	治愈	陈华	胡炜	胡炜	胫骨骨折切开复位钢板内固定术;胫骨植骨术
429	O108创伤骨科	2024-04-28	2024-05-27	3505486	杨中浩	男	25Y	骶骨骨折	骨盆骨折;马尾损伤;运动障碍;神经源性膀胱;神经源性肠;腰椎骨折;股骨骨折;跟骨骨折;跖骨骨折;足舟状骨骨折;骰骨骨折;肋骨骨折;下肢静脉血栓形成;精神分裂症;泌尿道感染;肾超声检查异常;肾结石	治愈	陈华	胡炜	胡炜	椎弓根钉内固定术;椎板切除减压术;腓肠神经吻合术
430	O108创伤骨科	2024-06-02	2024-06-10	3509772	吴银珠	女	69Y	股骨颈骨折	心功能不全;下肢静脉血栓形成;2型糖尿病;肾结石	治愈	陈华	胡炜	胡炜	全髋关节置换;髋关节滑膜切除术;髋轴面，陶瓷与聚乙烯
431	O108创伤骨科	2024-06-02	2024-06-10	3509932	谷文花	女	63Y	跖骨骨折	下肢静脉肌间血栓形成;肺气肿	好转	黄俊武	余贤斌	马亮亮	跖骨骨折切开复位螺钉内固定术;跖骨植骨术
432	O108创伤骨科	2024-06-03	2024-06-16	3511910	陈永光	男	67Y	Pilon骨折	开放性腓骨骨折;下肢静脉血栓形成;心功能不全;胆囊结石;后天性肾囊肿;前列腺结石;前列腺增生	治愈	黄俊武	余贤斌	马亮亮	胫骨骨折切开复位钢板内固定术;关节软骨修复术;胫骨植骨术
433	O108创伤骨科	2024-06-12	2024-06-23	3514100	刘爱菊	女	73Y	股骨颈骨折	下肢深静脉血栓形成;胫骨平台骨折;半月板损伤;膝关节后十字韧带损伤;膝关节积液;膝关节退行性病变;骨质疏松;高血压2级;支气管哮喘;冠状动脉粥样硬化性心脏病;肺肿物;老年性心脏病;肾错构瘤	治愈	赵友明	赵友明	柯陈荣	全髋关节置换;下腔静脉滤器置入术;髋关节滑膜切除术;髋轴面，陶瓷与陶瓷;股静脉穿刺术
434	O108创伤骨科	2024-06-29	2024-07-09	3518484	谢玉兰	女	61Y	取除骨折内固定装置	跟骨骨折;跖骨骨折;高血压2级;下肢静脉血栓形成;肝占位性病变	其他	黄义星	黄义星	陈春慧	跟骨内固定物取出术;跖骨内固定装置去除术
435	O108创伤骨科	2024-06-06	2024-07-13	3520937	王志霞	女	55Y	肱骨骨折	胸椎骨折T7/T8;下颌骨骨折;头皮血肿;创伤性湿肺;创伤性胸腔积液;创伤性气胸;四根以上肋骨骨折不伴第一肋骨骨折;胸椎横突骨折;下肢静脉血栓形成;肝囊肿	治愈	黄义星	黄义星	陈春慧	肱骨骨折切开复位钢板内固定术;胸椎骨折切开复位内固定术;肱骨植骨术;填充物(水泥)置入或置换
436	O108创伤骨科	2024-07-06	2024-07-15	3521460	张福根	男	67Y	股骨颈骨折	下肢静脉血栓形成;心功能不全;高血压;帕金森病	好转	黄俊武	余贤斌	马亮亮	人工股骨头置换术;髋关节滑膜切除术
437	O108创伤骨科	2024-07-12	2024-07-22	3524163	陈茹	女	39Y	胫骨平台骨折	骨盆骨折;下肢静脉血栓形成;开放性外伤术后恢复期	好转	陈华	胡炜	胡炜	胫骨骨折切开复位钢板内固定术;关节软骨修复术;胫骨植骨术
438	O108创伤骨科	2024-06-30	2024-08-03	3528522	陈建新	男	70Y	多发性骨盆骨折	耻骨骨折;髋臼骨折;肋骨骨折;胸腔积液;高血压;肺部感染;凝血功能异常;陈旧性肺结核;毁损肺;下肢静脉血栓形成;后天性肾囊肿;副脾	好转	黄俊武	余贤斌	余贤斌	关节软骨修复术;骨盆骨折切开复位钢板内固定术;骨盆植骨术
439	O108创伤骨科	2024-07-27	2024-08-08	3530586	孙明双	男	56Y	髌骨骨折	下肢静脉血栓形成;肝钙化灶;前列腺增生	治愈	黄义星	黄义星	陈春慧	髌骨骨折切开复位螺钉内固定术;关节软骨修复术
440	O108创伤骨科	2024-07-31	2024-08-10	3531075	付忠和	男	39Y	膝关节内侧副韧带完全断裂	胫骨骨折;清创术后;多处挫伤;下肢静脉曲张;下肢静脉血栓形成;脂肪肝;胆囊结石;前列腺结石;心功能不全;特发性肺纤维化	治愈	石成弟	石成弟	郑文浩	副韧带修补术;石膏托固定术
441	O108创伤骨科	2024-07-31	2024-08-12	3531344	叶招花	女	69Y	髌骨骨折	股四头肌肌腱损伤;高血压;2型糖尿病;室间隔肥大;肝囊肿;胆囊息肉;肾结石;下肢静脉血栓形成;退行性主动脉瓣疾患;心功能不全	治愈	陈华	胡炜	胡炜	髌骨骨折切开复位张力带钢丝内固定术;关节软骨修复术;股四头肌缝合术
442	O108创伤骨科	2024-08-13	2024-08-21	3535453	傅文川	男	63Y	骨盆骨折	清创术后;肋骨多处骨折;创伤性湿肺;肺部感染;下肢静脉血栓形成;后天性肾囊肿;前列腺增生;前列腺结石	好转	黄义星	黄义星	陈春慧
443	O108创伤骨科	2024-08-14	2024-08-24	3536518	林松妹	女	82Y	股骨粗隆间骨折	特发性(原发性)高血压;2型糖尿病;下肢静脉血栓形成;胆囊结石;肾结石;食管裂孔疝;甲状腺结节;房性期前收缩[房性早搏];Ⅰ度房室传导阻滞	治愈	黄义星	黄义星	陈春慧	股骨骨折闭合复位髓内针内固定术
444	O108创伤骨科	2024-08-22	2024-09-05	3541471	夏林香	女	97Y	股骨颈骨折	下肢静脉血栓形成;腔隙性脑梗死;老年性脑萎缩;心功能不全;脂肪肝;后天性肾囊肿	好转	黄俊武	胡炜	胡炜	人工股骨头置换术;髋关节滑膜切除术;下肢肌肉缝合术
445	O108创伤骨科	2024-10-01	2024-10-11	3554247	柯兰英	女	77Y	肱骨近端多发性骨折	肱骨大结节骨折;肱骨外科颈骨折;手术后恢复期;下肢静脉血栓形成;乙肝表面抗原携带者	治愈	孙辽军	项光恒	项光恒	肱骨骨折切开复位钢板内固定术;肱骨植骨术
446	O108创伤骨科	2024-10-06	2024-10-15	3555773	胡娇妹	女	74Y	锁骨骨折	脂肪肝;肾结石;老年性脑萎缩;食管裂孔疝;肝囊肿;肋骨多处骨折;胸腔积液;冠状动脉粥样硬化;下肢静脉血栓形成;老年性心脏病;心功能不全	治愈	陈华	张秀孟	张秀孟	锁骨骨折切开复位钢板内固定术;锁骨植骨术
447	O108创伤骨科	2024-10-03	2024-10-20	3557697	陈春凤	女	66Y	Pilon骨折	双踝骨折;尺骨茎突骨折伴桡骨远端骨折;头皮血肿;下腔静脉血栓形成;肺部感染;肺肿物;多发性肝囊肿;后天性肾囊肿	治愈	黄义星	黄义星	卢晓郎	胫骨骨折切开复位钢板内固定术;踝关节骨折切开复位钢板内固定术;关节软骨修复术;踝关节滑膜切除术;胫骨植骨术
448	O108创伤骨科	2024-10-12	2024-10-23	3559119	林须普	男	48Y	股骨粗隆间骨折	下肢深静脉血栓形成	治愈	黄俊武	胡炜	胡炜	股骨骨折闭合复位髓内针内固定术;下腔静脉滤器置入术
449	O108创伤骨科	2024-10-05	2024-10-27	3560526	张茂光	男	65Y	股骨骨折不连接	下肢静脉血栓形成;下肢动脉粥样硬化;后天性肾囊肿	治愈	黄俊武	胡炜	胡炜	股骨骨折切开复位钢板内固定术;髂骨切除术用作移植物;股骨植骨术
450	O108创伤骨科	2024-10-28	2024-11-09	3565531	洪求平	男	57Y	股骨干骨折	下肢深静脉血栓形成;胆囊结石	好转	王鉴顺	王鉴顺	蔡乐益	股骨骨折闭合复位髓内针内固定术;下腔静脉滤器置入术
451	O108创伤骨科	2024-10-28	2024-11-09	3565597	常德军	男	44Y	股骨粗隆下骨折	跟骨骨折;耻骨骨折;距骨骨折;尺骨茎突骨折伴桡骨远端骨折;肺的其他疾患;冠状动脉粥样硬化;下肢静脉血栓形成;下肢血栓性静脉炎	治愈	洪建军	郑亦静	郑亦静	股骨骨折闭合复位髓内针内固定术;跟骨骨折切开复位钢板内固定术;跟骨人工骨植骨术;关节软骨修复术
452	O108创伤骨科	2024-11-16	2024-11-26	3572724	周茂乐	男	85Y	股骨颈骨折	下肢静脉血栓形成;肝肾功能衰竭;痛风;胸椎退行性病变;下肢动脉粥样硬化;炎症后肺纤维化;冠状动脉闭塞;后天性肾囊肿;前列腺增生;念珠菌疹;前列腺结石	治愈	黄义星	卢晓郎	卢晓郎	人工股骨头置换术;髋关节滑膜切除术;髋关节病损切除术;髋轴面，陶瓷与聚乙烯
453	O108创伤骨科	2024-11-20	2024-11-26	3572745	陈凤香	女	88Y	股骨颈骨折	头皮挫伤;老年性痴呆;下肢静脉血栓形成;多发性肝囊肿;后天性肾囊肿	好转	石成弟	石成弟	郑文浩	人工股骨头置换术;髋关节滑膜切除术;髋轴面，陶瓷与聚乙烯
454	O108创伤骨科	2024-11-23	2024-12-04	3575807	滕小英	女	90Y	股骨粗隆间骨折	白内障;下肢静脉血栓形成;多发性肝囊肿;升主动脉扩张;室间隔肥大;主动脉(瓣)关闭不全;心功能不全	治愈	陈华	吴剑彬	吴剑彬	股骨骨折闭合复位髓内针内固定术;股骨颈/股骨转子间骨折手法整复术
455	O108创伤骨科	2024-12-06	2024-12-09	3577655	叶招花	女	70Y	取除骨折内固定装置	特发性(原发性)高血压;2型糖尿病;二尖瓣反流;胆囊息肉;肾错构瘤;下肢静脉血栓形成	其他	陈华	吴剑彬	吴剑彬	髌骨内固定装置去除术;皮肤缝合术
456	O108创伤骨科	2024-12-12	2024-12-23	3583129	陈福香	女	82Y	股骨髁间骨折	陈旧性关节软骨损伤;下肢深静脉血栓形成;膝关节退行性病变;膝关节积液	治愈	陈华	吴剑彬	吴剑彬	股骨骨折切开复位钢板内固定术;股静脉穿刺术;股骨人工骨植骨术;下腔静脉滤器置入术;关节软骨修复术
457	O108创伤骨科	2024-12-12	2024-12-26	3584629	侯秋妹	女	51Y	多发性骨盆骨折	髌骨骨折;眶骨骨折;鼻骨骨折;创伤性硬膜下出血;肋骨多处骨折;下肢静脉血栓形成;坐骨神经损伤;股骨髁骨折;创伤性硬脑膜外出血;胸腔积液;膝关节积液	治愈	石成弟	项光恒	项光恒	骨盆骨折切开复位钢板内固定术;髌骨骨折切开复位张力带钢丝内固定术;髋骨骨折切开复位钢板内固定术;关节软骨修复术;髋关节病损切除术
458	O108创伤骨科	2024-12-18	2024-12-28	3585144	缪爱玉	女	68Y	多发性骨盆骨折	掌骨骨折;肋骨多处骨折;脂肪肝;肾结石;皮肤挫伤;下肢静脉血栓形成;耻骨骨折;髋臼骨折;髂骨骨折;骶骨骨折	好转	冯永增	冯永增	徐宏威	掌骨外固定术;骨盆骨折切开复位螺钉内固定术
459	O108创伤骨科	2024-12-21	2024-12-28	3585436	潘玉石	男	84Y	股骨颈骨折	下肢静脉血栓形成	治愈	石成弟	项光恒	项光恒	人工股骨头置换术;髋关节滑膜切除术
460	O108创伤骨科	2024-12-17	2024-12-30	3585962	向秀英	女	48Y	胫骨平台骨折	下肢静脉血栓形成;肺肿物;肺钙化;特发性肺纤维化;主动脉(瓣)关闭不全;心功能不全	治愈	陈华	吴剑彬	吴剑彬	胫骨骨折切开复位钢板内固定术;膝关节半月板成形术;关节软骨修复术
461	O109创伤骨科	2024-05-07	2024-05-08	3499815	王凤柳	女	81Y	股骨粗隆间骨折	2型糖尿病;受压区压疮;下肢静脉肌间血栓形成;动脉粥样硬化;肺诊断性影像异常	治愈	余可和	余可和	卢晓郎
462	O109创伤骨科	2024-05-04	2024-05-11	3500217	沈细金	女	52Y	股骨颈骨折	肺诊断性影像异常;后天性肾囊肿;下肢静脉肌间血栓形成	治愈	洪建军	张秀孟	张秀孟	股骨骨折闭合复位螺钉内固定术;股骨颈/股骨转子间骨折手法整复术
463	O109创伤骨科	2024-05-11	2024-05-18	3502391	陈杨玉	女	76Y	股骨颈骨折	高血压;下肢静脉肌间血栓形成;胆囊结石;肺诊断性影像异常;老年性心脏病	治愈	水小龙	水小龙	汪吉棋	人工股骨头置换术;髋关节滑膜切除术
464	O109创伤骨科	2024-05-10	2024-05-21	3503546	林书翠	男	81Y	股骨粗隆间骨折	下肢静脉肌间血栓形成;下肢动脉粥样硬化;支气管肺炎;高血压;膀胱结石;脑出血后遗症	治愈	余可和	卢晓郎	卢晓郎	股骨骨折闭合复位髓内针内固定术
465	O109创伤骨科	2024-06-03	2024-06-10	3509859	许美兰	女	69Y	胸椎骨折T11/T12	腰椎退行性病变;肝血管瘤;胆囊结石;后天性肾囊肿;下肢动脉粥样硬化;下肢静脉肌间血栓形成;肺诊断性影像异常;骨质疏松	治愈	余可和	卢晓郎	卢晓郎	胸椎骨折球囊扩张成形术
466	O109创伤骨科	2024-06-15	2024-06-26	3515028	叶秀红	女	76Y	股骨粗隆间骨折	胸腔积液;下肢静脉肌间血栓形成;肺部感染;下肢动脉粥样硬化	治愈	余可和	卢晓郎	卢晓郎	股骨骨折闭合复位髓内针内固定术
467	O109创伤骨科	2024-06-26	2024-07-02	3516764	彭美玉	女	66Y	髌骨骨折	高血压;低钾血症;下肢静脉肌间血栓形成;膝关节退行性病变	治愈	余洋	余洋	徐宏威	髌骨骨折切开复位张力带钢丝内固定术;膝关节的其他修补术;髌韧带重建术
468	O109创伤骨科	2024-06-29	2024-07-05	3517835	金凤妹	女	83Y	肱骨近端骨折	腰椎退行性病变;脊柱侧弯;腰椎间盘突出;下肢静脉肌间血栓形成;下肢动脉粥样硬化;胆囊息肉	治愈	潘骏	金海东	金海东	肱骨骨折切开复位钢板内固定术;肩袖修补术
469	O109创伤骨科	2024-07-27	2024-08-03	3528565	林春连	女	76Y	股骨粗隆间骨折	下肢静脉肌间血栓形成;主动脉瓣关闭不全;心功能不全;肝回声不均;肝钙化灶;老年性痴呆;退行性主动脉瓣疾患	治愈	洪建军	张秀孟	张秀孟	股骨骨折闭合复位髓内针内固定术;股骨颈/股骨转子间骨折手法整复术
470	O109创伤骨科	2024-07-26	2024-08-05	3529198	陈爱池	女	60Y	尺骨茎突骨折伴桡骨远端骨折	腰椎骨折L1;胸椎骨折T9/T10;胸椎退行性病变;腰椎退行性病变;腰椎间盘突出;下肢静脉肌间血栓形成;脂肪肝;肝囊肿	治愈	水小龙	水小龙	汪吉棋	桡骨骨折切开复位钢板内固定术;关节软骨修复术;胸椎骨折球囊扩张成形术;腰椎骨折球囊扩张成形术
471	O109创伤骨科	2024-08-13	2024-08-19	3534924	周连芬	女	68Y	胫骨平台骨折	老年性关节炎;下肢静脉肌间血栓形成;脂肪肝;胆囊结石;高血压;先天性肺大泡;两根肋骨骨折不伴第一肋骨骨折;老年性心脏瓣膜病	治愈	水小龙	水小龙	汪吉棋	胫骨骨折切开复位钢板内固定术;膝关节的其他修补术;胫骨人工骨植骨术
472	O109创伤骨科	2024-08-19	2024-08-31	3539561	叶菜兰	女	58Y	下肢静脉曲张伴静脉炎	臂骨折后遗症;下肢血栓性静脉炎;下肢静脉功能不全;桡侧副韧带断裂	治愈	水小龙	水小龙	汪吉棋	下肢静脉造影;大隐静脉高位结扎和剥脱术;肘关节固定术;肘关节的其他修补术
473	O109创伤骨科	2024-08-05	2024-09-03	3540628	彭玉生	男	90Y	胫骨干骨折伴腓骨骨折	多处挫伤;下肢静脉血栓形成;腘窝囊肿;清创术后	治愈	潘骏	金海东	金海东	胫骨骨折切开复位钢板内固定术;胫骨人工骨植骨术;皮肤和皮下坏死组织切除清创术;胫骨内固定装置去除术;皮肤和皮下坏死组织切除清创术
474	O109创伤骨科	2024-08-31	2024-09-03	3540835	安陈媛	女	84Y	腰椎骨折L3	下肢静脉肌间血栓形成;腰椎退行性病变;胸椎退行性病变;胆囊结石;后天性肾囊肿;肾结石;肾错构瘤;老年性骨质疏松;骨折术后恢复期	治愈	水小龙	水小龙	徐宏威	腰椎骨折球囊扩张成形术
475	O109创伤骨科	2024-08-26	2024-09-05	3541384	李炳华	女	59Y	Pilon骨折	腓骨骨折累及踝关节;踝距腓前韧带断裂;跟腓韧带损伤;下肢静脉血栓形成;脂肪肝;糖尿病;老年性心脏瓣膜病	治愈	余可和	余可和	汪吉棋	胫骨骨折切开复位钢板内固定术;踝关节骨折切开复位钢板内固定术;踝融合术;踝关节滑膜切除术;踝关节的其他修补术;踝关节韧带修补术
476	O109创伤骨科	2024-09-12	2024-09-21	3547076	陈碎香	女	87Y	股骨粗隆间骨折	肾功能不全;腰椎退行性病变;手术后状态，其他特指的;腰椎椎管狭窄;高血压;下肢静脉肌间血栓形成;下肢动脉粥样硬化;肺炎;甲状腺结节;退行性主动脉瓣疾患;主动脉(瓣)关闭不全;胆囊息肉;后天性肾囊肿	治愈	冯永增	冯永增	汤嘉豪	股骨骨折闭合复位髓内针内固定术
477	O109创伤骨科	2024-09-16	2024-09-22	3547583	陈凤翠	女	84Y	股骨粗隆间骨折	高血压;下肢静脉血栓形成;肝回声不均;胆总管扩张;肾结石;心功能不全;退行性主动脉瓣疾患;主动脉(瓣)关闭不全	治愈	洪建军	郑亦静	郑亦静	股骨骨折闭合复位髓内针内固定术;肌腱缝合术
478	O109创伤骨科	2024-09-16	2024-09-27	3549585	赵春松	男	69Y	双踝骨折	冠状动脉支架植入后状态;股静脉血栓形成;肾结石;前列腺增生;高血压;退行性主动脉瓣疾患;二尖瓣及主动脉瓣关闭不全;心功能不全;前列腺结石;踝部韧带断裂	好转	余可和	余可和	汪吉棋	踝关节骨折切开复位钢板内固定术;踝关节的其他修补术;踝融合术
479	O109创伤骨科	2024-09-17	2024-10-05	3552517	丁柏青	男	72Y	胫骨骨折不连接	陈旧性肋骨骨折;肺诊断性影像检查的异常所见;主动脉硬化;下肢动脉粥样硬化;下肢静脉肌间血栓形成;脂肪肝;肝囊肿;后天性肾囊肿;前列腺增生;心功能不全;前列腺结石;退行性主动脉瓣疾患;主动脉(瓣)关闭不全	治愈	洪建军	郑亦静	郑亦静	胫骨骨折切开复位钢板内固定术;髂骨切除术用作移植物;胫骨外固定装置去除术
480	O109创伤骨科	2024-10-20	2024-10-28	3561055	金仙奇	男	54Y	胫骨髁间棘骨折	胫骨平台骨折;膝关节十字韧带损伤;膝半月板撕裂;脂肪肝;前列腺增生;下肢静脉血栓形成;肺诊断性影像检查的异常所见	治愈	周一飞	周一飞	翁摄稷	膝关节镜下胫骨髁间棘骨折固定术;膝关节的其他修补术;下肢关节囊缝合术;胫骨骨折切开复位螺钉内固定术
481	O109创伤骨科	2024-10-28	2024-11-08	3565279	朱启超	男	89Y	股骨粗隆间骨折	高血压;2型糖尿病;肺部感染;肺诊断性影像检查的异常所见;心包积液;主动脉钙化;轻度肺动脉高压;后天性肾囊肿;前列腺增生;下肢静脉血栓形成;腹壁疝;胆囊结石;前列腺钙化灶	治愈	洪建军	郑亦静	郑亦静	股骨骨折切开复位髓内针内固定术;下肢肌腱缝合术
482	O109创伤骨科	2024-11-27	2024-12-07	3576754	杜佐松	男	63Y	股骨颈骨折	髋关节病;高血压;特发性肺纤维化;下肢动脉粥样硬化;心功能不全;下肢静脉肌间血栓形成;前列腺钙化灶	治愈	潘骏	潘骏	潘骏	全髋关节置换;髋关节滑膜切除术;髋轴面，陶瓷与聚乙烯
483	O109创伤骨科	2024-11-27	2024-12-07	3576897	丁春香	女	60Y	胸椎骨折T11/T12	下肢静脉肌间血栓形成;脂肪肝;肺诊断性影像检查的异常所见;肝囊肿;胆囊息肉	治愈	赵友明	赵友明	胡炜	腰椎骨折球囊扩张成形术
484	O109创伤骨科	2024-11-27	2024-12-08	3577284	潘彩娥	女	63Y	尺骨鹰嘴骨折	高血压;膝关节退行性病变;上臂挫伤;下肢静脉血栓形成;2型糖尿病;脂肪肝;肾结石;心功能不全;肺诊断性影像检查的异常所见;特发性肺纤维化;主动脉钙化;甲状腺结节;下肢静脉肌间血栓形成	治愈	洪建军	卢晓郎	卢晓郎	尺骨骨折切开复位钢板内固定术;肘关节融合术;关节软骨修复术;尺骨人工骨植骨术
485	O109创伤骨科	2024-12-06	2024-12-13	3579380	纪美绿	女	54Y	股骨颈骨折	脂肪肝;下肢静脉肌间血栓形成	治愈	黄俊武	黄俊武	张秀孟	股骨骨折闭合复位髓内针内固定术;关节软骨修复术
486	O109创伤骨科	2024-12-13	2024-12-14	3579736	杨绍东	男	58Y	取除骨折内固定装置	由于其他原因而未进行操作;下肢静脉肌间血栓形成;下肢动脉粥样硬化;心功能不全;前列腺结石;二尖瓣反流	治愈	洪建军	卢晓郎	卢晓郎
487	O109创伤骨科	2024-11-27	2024-12-21	3582459	黄天献	男	62Y	骨盆骨折	髂骨骨折;耻骨骨折;骶骨骨折;髋臼骨折;创伤性膀胱破裂;腰骶横突骨折;腰骶椎间盘突出;腰椎退行性病变;胸椎退行性病变;两根肋骨骨折不伴第一肋骨骨折;肾积水伴肾结石;后天性肾囊肿;肾盂积水，其他的;心功能不全;前列腺结石;下肢静脉肌间血栓形成;腹腔积液;肺气肿	治愈	洪建军	卢晓郎	卢晓郎	骨盆骨折切开复位钢板内固定术;髂骨骨折切开复位钢板内固定术;耻骨骨折切开复位内固定术;关节软骨修复术;膀胱修补术;骨盆植骨术
488	O110关节外科	2024-06-01	2024-06-12	3510593	王董柳	女	75Y	原发性单侧膝关节病	人工膝关节;高血压;炎症后肺纤维化;主动脉钙化;陈旧性肋骨骨折;肝回声不均;下肢动脉粥样硬化;下肢静脉血栓形成;心功能不全;退行性主动脉瓣疾患;主动脉瓣关闭不全	治愈	潘孝云	杨阳	林剑2	全部膝关节置换
489	O110关节外科	2024-06-20	2024-07-22	3524199	娄益算	男	50Y	髋臼骨折	胫骨平台骨折;膝关节多处韧带损伤;膝半月板撕裂;髌韧带损伤;肋骨多处骨折;胸腔积液;腹腔感染;肝功能不全;下肢静脉血栓形成;退行性主动脉瓣疾患;肺肿物;血小板增多;真菌感染	治愈	潘孝云	杨阳	林剑2	骨盆骨折闭合性复位术;盆骨外固定术;应用单平面外固定架;副韧带修补术
490	O110关节外科	2024-07-13	2024-08-03	3528649	陈莲莲	女	54Y	膝关节前十字韧带完全断裂	膝半月板撕裂;肩袖损伤;髌韧带损伤;肱骨大结节骨折;肝囊肿;下肢静脉血栓形成	治愈	潘孝云	杨阳	林剑2	肱骨骨折闭合复位螺钉内固定术;肩关节镜下肩袖修补术;关节镜膝关节半月板部分切除术;膝关节镜下半月板成形术;异体肌腱移植术;关节镜膝关节前交叉韧带重建术
491	O110关节外科	2024-07-07	2024-08-06	3529696	叶余文	男	54Y	骨盆骨折	股骨粗隆下骨折;膝关节十字韧带断裂;膝关节内侧副韧带完全断裂;膝外侧半月板撕裂;膝关节退行性病变;腓骨骨折;肾包膜下积液;后天性肾囊肿;前列腺钙化灶;肝囊肿;胸腔积液;下肢静脉血栓形成	治愈	潘孝云	薛星河	林剑2	骨盆骨折闭合复位内固定术;盆骨外固定术;应用单平面外固定架;股骨骨折闭合复位髓内针内固定术;关节镜膝关节交叉韧带重建术;关节镜膝外侧半月板部分切除术;关节镜膝关节副韧带修补术;异体肌腱移植术
492	O110关节外科	2024-08-24	2024-08-31	3539329	王祖安	男	51Y	膝内侧半月板损伤	膝关节前十字韧带损伤;膝关节副韧带损伤;股骨内髁骨折;椎间盘膨隆;腰椎间盘突出;腰椎退行性病变;下肢静脉肌间血栓形成;脂肪肝	治愈	潘孝云	薛星河	林剑2	膝关节镜下半月板成形术
493	O110关节外科	2024-08-06	2024-09-08	3542543	娄益算	男	50Y	胫骨平台骨折	取除骨折内固定装置;膝关节多处韧带损伤;膝半月板撕裂;肋骨多处骨折;骨盆骨折;腓总神经损伤;胸腔积液;肝钙化灶;后天性肾囊肿;心功能不全;下腔静脉血栓形成	治愈	潘孝云	杨阳	林剑2	胫骨骨折切开复位钢板内固定术;胫骨人工骨植骨术;关节镜膝关节检查;骨盆外固定装置去除术
494	O110关节外科	2024-08-11	2024-09-09	3542787	南卿妹	女	69Y	膝关节十字韧带断裂	膝内侧半月板损伤;原发性单侧膝关节病;趾骨骨折;后天性(足母)外翻;肋骨多处骨折;胸腔积液;主动脉钙化;肝囊肿;后天性肾囊肿;下肢静脉肌间血栓形成;二尖瓣及主动脉瓣关闭不全	治愈	潘孝云	杨阳	林剑2	关节镜膝关节交叉韧带重建术;膝关节镜下半月板缝合术;异体肌腱移植术
495	O110关节外科	2024-09-15	2024-10-02	3551864	黄作定	男	80Y	原发性单侧膝关节病	半月板损伤;膝关节前十字韧带损伤;膝关节滑膜炎;膝关节积液;高血压;贲门撕裂症;下肢静脉血栓形成;二尖瓣及主动脉瓣关闭不全;脂肪肝;后天性肾囊肿;孤立性肺结节;主动脉钙化;冠状动脉粥样硬化;肺部感染;陈旧性肋骨骨折	治愈	潘孝云	薛星河	林剑2	全部膝关节置换;膝关节滑膜切除术
496	O110关节外科	2024-09-28	2024-10-13	3554945	应秀连	女	78Y	股骨干骨折	特发性(原发性)高血压;脑血栓形成;脂肪肝;多发性肝囊肿;后天性肾囊肿;下肢动脉粥样硬化;心功能不全	好转	翁益民	翁益民	王特	股骨骨折闭合复位髓内针内固定术;股骨人工骨植骨术
497	O110关节外科	2024-12-24	2024-12-30	3586052	陈林香	女	84Y	股骨颈骨折	股骨头缺血性坏死;老年性脑萎缩;下肢动脉粥样硬化;下肢静脉血栓形成;肺肿物;主动脉钙化;肝囊肿;肾上腺结节性增生;后天性肾囊肿;退行性主动脉瓣疾患;主动脉瓣关闭不全;心功能不全	治愈	潘孝云	薛星河	林剑2	人工双动股骨头置换术;髋轴面，陶瓷与聚乙烯;髋关节滑膜切除术
498	O111关节外科	2024-04-27	2024-05-06	3499125	胡奶春	女	92Y	股骨颈骨折	骨质疏松;肺部感染;肝囊肿;后天性肾囊肿;下肢动脉粥样硬化;下肢静脉肌间血栓形成	治愈	张宇	樊沛	童珉基	人工股骨头置换术;髋轴面，陶瓷与聚乙烯
499	O111关节外科	2024-05-05	2024-05-10	3500135	叶爱光	男	60Y	内踝骨折	下肢静脉血栓形成;脂肪肝	治愈	张宇	樊沛	童珉基	踝关节骨折切开复位螺钉内固定术
500	O111关节外科	2024-05-06	2024-05-16	3502052	鞠庆兰	女	93Y	股骨粗隆间骨折	2型糖尿病;下肢动脉粥样硬化;下肢静脉血栓形成	治愈	张宇	樊沛	童珉基	股骨骨折闭合复位髓内针内固定术
501	O111关节外科	2024-07-24	2024-08-10	3531212	蔡金旺	女	81Y	股骨颈骨折	心功能Ⅲ级;肺动脉高压;肺肿物;房室传导阻滞;胸腔积液;下腔静脉血栓形成	治愈	胡月正	柳海晓	许心弦	人工股骨头置换术;髋轴面，陶瓷与聚乙烯;多根导管冠状动脉造影
502	O111关节外科	2024-09-12	2024-09-19	3546659	缪银红	女	69Y	胫骨平台骨折	膝关节退行性病变;脂肪肝;下肢静脉血栓形成	治愈	张宇	薛恩兴	李振兴	胫骨骨折切开复位钢板内固定术
503	O111关节外科	2024-09-01	2024-09-23	3547967	厉圣光	男	51Y	胫骨平台骨折	腘动脉血栓形成;膝关节十字韧带损伤;膝半月板撕裂;胫神经损伤;腓神经损伤;外踝骨折;陈旧性肋骨骨折;下肢动脉粥样硬化;下肢静脉血栓形成;2型糖尿病	治愈	胡月正	柳海晓	余炜	胫骨骨折切开复位钢板内固定术;膝关节镜下半月板成形术;胫骨外固定装置去除术;石膏绷带固定;胫骨人工骨植骨术;皮肤和皮下坏死组织切除清创术;创面封闭式负压引流术（VSD)
504	O111关节外科	2024-09-10	2024-09-28	3549836	邵翠英	女	81Y	股骨粗隆间骨折	高血压;2型糖尿病;下肢静脉血栓形成;胆汁淤积症;多发性脑梗死	治愈	胡月正	柳海晓	余炜	股骨骨折闭合复位髓内针内固定术
505	O111关节外科	2024-09-26	2024-10-03	3551892	郑继锁	男	91Y	股骨颈骨折	骨质疏松;下肢静脉血栓形成;后天性肾囊肿;前列腺增生;前列腺结石;高血压	治愈	张宇	陈成旺	徐道亮	全髋关节置换;髋轴面，陶瓷与聚乙烯
506	O111关节外科	2024-09-28	2024-10-07	3552932	郑阿英	女	80Y	股骨颈骨折	高血压;下肢动脉粥样硬化;后天性肾囊肿;孤立性肺结节;陈旧性肋骨骨折;下肢静脉肌间血栓形成;肺肿物	治愈	张宇	陈成旺	徐道亮	全髋关节置换;髋轴面，陶瓷与聚乙烯
507	O111关节外科	2024-11-17	2024-12-01	3574757	李长华	女	81Y	股骨颈骨折	高血压;心房颤动;下肢动脉粥样硬化;下肢静脉曲张;主动脉瓣疾患;肝回声不均;后天性肾囊肿;肾结石;特发性肺纤维化;支气管扩张伴感染;下肢静脉血栓形成	治愈	张宇	樊沛	余炜	人工股骨头置换术;髋轴面，陶瓷与聚乙烯;髋关节滑膜切除术
508	O111关节外科	2024-11-28	2024-12-17	3580997	胡振松	男	47Y	胸椎骨折	腰椎骨折L1;膝关节前十字韧带损伤;膝半月板撕裂;截瘫;胫骨平台骨折;下肢静脉血栓形成	治愈	胡月正	柳海晓	许心弦	脊椎骨折切开复位内固定术;关节镜膝关节前交叉韧带重建术;关节镜膝关节滑膜切除术;异体肌腱移植术
509	O204ICU	2024-04-30	2024-05-14	3501383	夏阿翠	女	89Y	股骨假体周围骨折	心脏停搏复苏成功;循环衰竭;呼吸衰竭;肺部感染;高血压;胆囊结石;低钾血症;下肢静脉肌间血栓形成;骨折术后恢复期	好转	程碧环	王本极	王本极	股骨骨折切开复位螺钉内固定术;呼吸机治疗[小于96小时];股骨内固定装置去除术;气管内插管
510	O204ICU	2024-07-05	2024-07-18	3522941	林杨粉	女	86Y	前臂挤压伤	骶骨骨折;髂骨骨折;耻骨骨折;肺挫伤;肋骨多处骨折;创伤性气胸;创伤性胸腔积液;创伤性皮下气肿;耳开放性伤口;下肢静脉肌间血栓形成;下肢动脉粥样硬化;失血性休克	好转	程碧环	王瑞丽	王瑞丽	经前臂截断术;外耳软骨切除术;骨盆骨折闭合性复位术;盆骨外固定术;带蒂皮瓣移植术
511	O204ICU	2024-07-17	2024-07-25	3525567	林仁兰	女	83Y	股骨颈骨折	脑梗死;高血压3级;2型糖尿病;孤立性肺结节;下肢静脉血栓形成;脂肪肝;胆囊结石;后天性肾囊肿	好转	程碧环	王本极	王本极	人工双动股骨头置换术;髋轴面，金属与聚乙烯
512	O204ICU	2024-07-24	2024-08-05	3529547	董仁宽	男	65Y	多发性骨盆骨折	肺挫伤;尿道损伤;骶骨骨折;下肢静脉肌间血栓形成;肺大疱;前列腺钙化灶;乙型病毒性肝炎病原携带者;下肢动脉粥样硬化;腰椎峡部裂	好转	程碧环	谢媚媚	谢媚媚	骨盆骨折闭合复位内固定术;盆骨外固定术;应用单平面外固定架
513	O204ICU	2024-09-17	2024-09-30	3551257	朱德强	男	76Y	股骨骨折	骨盆骨折;腓骨骨折;心功能不全;肾功能不全;肺部感染;腹腔积液;高血压;下肢静脉血栓形成;下肢动脉粥样硬化;下肢动脉狭窄;肝囊肿;后天性肾囊肿;颈椎退行性病变;上颌窦炎;腔隙性脑梗死;老年性脑萎缩	好转	程碧环	谢媚媚	谢媚媚	股骨骨折闭合复位髓内针内固定术;骨盆骨折闭合复位内固定术;股骨颈/股骨转子间骨折手法整复术;骨移植术
514	O204ICU	2024-08-16	2024-10-04	3552385	蔡加星	男	40Y	颈部脊髓损伤	创伤性颈椎间盘破裂;颈椎脱位C4/C5;创伤性脑脊液漏;颈部食管挫伤;声带麻痹;肋骨骨折;中枢神经系统感染;创伤性血气胸;浅表损伤;下肢静脉血栓形成;肾损伤;高钾血症;代谢性酸中毒;导管相关性感染;导管相关性尿路感染	好转	程碧环	吴海亚	吴海亚	颈椎前路椎管减压术;颈椎间盘切除术;颈椎脱位切开复位内固定术;皮肤和皮下坏死组织切除清创术;颈椎后路单开门椎管减压术;椎板切除减压术;颈椎脱位切开复位内固定术;呼吸机治疗[小于96小时];气管内插管;呼吸机治疗[小于96小时];呼吸机治疗[小于96小时]
515	O204ICU	2024-09-27	2024-10-23	3559386	余福寿	男	61Y	颈部脊髓损伤	颈椎多处骨折;肋骨多发性骨折伴第一肋骨骨折;胸椎多处骨折;肩胛骨骨折;创伤性血气胸;肺挫伤;多处皮肤浅表挫伤;麻痹性肠梗阻;创伤性湿肺;肺部感染;骶尾区Ⅰ期压疮;低蛋白血症;神经源性膀胱;颈椎病;下肢静脉血栓形成;头皮血肿	好转	程碧环	程碧环	傅蓓蓓	颈椎后路单开门椎管减压术;颈椎骨折切开复位内固定术;骶尾部病损切除术;带蒂皮瓣或皮瓣移植的修复术;胸腔闭式引流术
516	O204ICU	2024-10-25	2024-11-27	3573328	郑玉蝉	女	73Y	股骨干骨折	锁骨骨折;腔隙性脑梗死;泌尿道感染;高血压;下肢深静脉血栓形成;老年性脑萎缩;胸腔积液;骨质疏松;主动脉钙化;脱髓鞘性白质脑病	治愈	程碧环	陈德准	戴洲豪	股骨骨折切开复位钢板内固定术;呼吸机治疗[小于96小时];颈内静脉穿刺中心静脉置管术;锁骨骨折切开复位钢板内固定术;股骨植骨术
517	O204ICU	2024-12-26	2024-12-28	3585268	陈云香	女	69Y	股骨粗隆间骨折	高血压;下肢静脉血栓形成;脑卒中后遗症;肾功能不全;下肢动脉粥样硬化;血液透析状态	好转	程碧环	庄荣	庄荣	股骨骨折闭合复位髓内针内固定术;股骨人工骨植骨术
518	O205内外科病区	2024-05-20	2024-05-27	3505235	施碎珠	女	58Y	胫骨平台骨折	下肢静脉肌间血栓形成;肝囊肿	治愈	孔建中	孔建中	陈墨川	胫骨骨折切开复位钢板内固定术;关节软骨修复术;胫骨植骨术
519	O205内外科病区	2024-06-04	2024-06-15	3511286	缪娇娣	女	76Y	股骨粗隆间骨折	股骨粗隆下骨折;肋骨骨折;创伤性胸腔积液;老年性心脏瓣膜病;胆囊结石;下肢静脉血栓形成	治愈	水小龙	水小龙	汪吉棋	股骨骨折闭合复位髓内针内固定术
520	O205内外科病区	2024-06-22	2024-07-07	3518478	阮周彬	男	73Y	股骨粗隆间骨折	高血压;2型糖尿病;高脂血症;下肢静脉血栓形成;颈动脉硬化;脂肪肝	治愈	孔建中	陈墨川	陈墨川	股骨骨折闭合复位螺钉内固定术;股骨植骨术
521	O205内外科病区	2024-06-02	2024-07-13	3520850	汪九标	男	72Y	锁骨骨折	外踝骨折;距骨骨折;胫骨远端骨折;踝关节不稳定;踝关节损伤;腔隙性脑梗死;胆囊结石;肾结石;前列腺增生;前列腺结石;肺的其他疾患;老年性心脏瓣膜病;下肢静脉血栓形成;下肢动脉粥样硬化	好转	杨雷	方文来	谢忠杰	锁骨骨折切开复位钢板内固定术;锁骨植骨术;皮肤和皮下坏死组织切除清创术;踝融合术;下肢韧带缝合术;肌腱、血管、神经探查术;创面封闭式负压引流术（VSD)
522	O205内外科病区	2024-07-21	2024-07-23	3524796	姜香柳	女	88Y	股骨粗隆间骨折	下肢静脉血栓形成;退行性主动脉瓣疾患;二尖瓣及主动脉瓣关闭不全;心功能不全;肝回声不均;肝囊肿;胆囊息肉;胆囊胆固醇沉着症;肾错构瘤;肾盂囊肿	未愈	陈华	胡炜	胡炜
523	O205内外科病区	2024-07-13	2024-08-01	3527906	林方良	男	56Y	胫骨远端骨折伴腓骨骨折	跟骨骨折;小腿浅表损伤;下肢静脉肌间血栓形成;肺肿物;后天性肾囊肿;肝钙化灶;陈旧性肋骨骨折;老年性心脏瓣膜病;坠积性肺炎;特发性肺纤维化	治愈	赵友明	赵友明	柯陈荣	胫骨骨折切开复位钢板内固定术;腓骨骨折切开复位髓内针内固定术;跟骨骨折切开复位螺钉内固定术;胫骨植骨术;石膏托固定术;关节软骨修复术
524	O205内外科病区	2024-08-05	2024-08-15	3533296	董秀翠	女	65Y	腰椎骨折	骨质疏松;心房颤动;血小板减少;腰椎间盘突出;脊椎退行性病变;下肢静脉血栓形成;老年性心脏瓣膜病;二尖(瓣)关闭不全	治愈	林仲可	林仲可	林仲可	腰椎骨折球囊扩张成形术
525	O205内外科病区	2024-08-06	2024-08-20	3535074	潘岳祥	男	77Y	髌骨骨折	下肢静脉血栓形成;肾结石;前列腺增生;心功能不全	好转	黄俊武	余贤斌	余贤斌	髌骨骨折切开复位张力带钢丝内固定术;下腔静脉滤器置入术
526	O205内外科病区	2024-08-26	2024-09-22	3547617	陈和平	男	65Y	耻骨骨折	髋臼骨折;骶骨骨折;糖尿病;肝恶性肿瘤个人史;胆囊结石;前列腺结石;下肢静脉血栓形成;老年性脑萎缩	好转	程碧环	程碧环	傅蓓蓓
527	O205内外科病区	2024-08-23	2024-09-25	3548886	谢钦冲	男	55Y	耻骨骨折	髂骨骨折;骶骨骨折;肋骨多处骨折;胸椎多处骨折;多发性腰椎骨折;股骨颈骨折;掌骨骨折;腕骨骨折;肺部感染;下肢静脉血栓形成;脊椎退行性病变;颈椎间盘突出;糖尿病	治愈	邓应彬	黄和	黄和	股静脉穿刺术;下腔静脉滤器置入术;骨盆骨折切开复位钢板内固定术;桡尺关节脱位闭合复位术;石膏绷带固定;股骨骨折闭合复位螺钉内固定术;肋骨骨折切开复位内固定术;骨盆骨折切开复位钢板内固定术;盆骨外固定术
528	O205内外科病区	2024-09-20	2024-10-03	3552007	林云发	男	73Y	肋骨多处骨折	胸腔积液;肺不张;肺部感染;下肢深静脉血栓形成;老年性痴呆;头部损伤后遗症	好转	程碧环	张晓隆	周王锋	胸腔闭式引流术
529	O205内外科病区	2024-09-27	2024-10-04	3552376	蔡万弟	女	44Y	胫骨髁骨折	膝关节副韧带断裂;膝关节前十字韧带损伤;下肢深静脉血栓形成;肺钙化	好转	黄俊武	胡炜	胡炜	胫骨骨折切开复位钢针内固定术;副韧带修补术;石膏绷带固定
530	O205内外科病区	2024-10-05	2024-10-18	3556945	魏姑雅	女	86Y	股骨粗隆间骨折	腔隙性脑梗死;老年性脑萎缩;高血压;肺肿物;脱髓鞘性脑病;脑缺血灶;下肢静脉血栓形成	好转	程碧环	吴海亚	周王锋	股骨骨折闭合复位髓内针内固定术
531	O205内外科病区	2024-09-20	2024-10-21	3558229	张财宏	男	52Y	创伤性脾破裂	创伤性肾破裂;腹腔积液;失血性休克;肋骨多处骨折;肺挫伤;创伤性气胸;胸椎多处骨折;多发性腰椎骨折;髂骨骨折;下肢静脉血栓形成	治愈	邓应彬	周磊	周磊	全脾切除术;单侧肾切除术
532	O205内外科病区	2024-11-17	2024-11-20	3570442	王德凤	女	87Y	胸椎骨折	腰椎骨折;心功能不全;下肢动脉粥样硬化闭塞症;下肢静脉血栓形成;肺部感染	治愈	黄其杉	田乃锋	田乃锋	胸椎骨折球囊扩张成形术;腰椎骨折球囊扩张成形术;椎骨活组织检查
533	O205内外科病区	2024-11-27	2024-12-04	3576013	黄新康	男	85Y	股骨粗隆间骨折	桡骨远端骨折;下肢静脉血栓形成;多发性肝囊肿;后天性肾囊肿;前列腺结石;心功能不全;肺部感染;甲状腺结节;脾钙化;前列腺增生;退行性主动脉瓣疾患;主动脉(瓣)关闭不全	治愈	黄俊武	张秀孟	张秀孟	股骨骨折闭合复位髓内针内固定术;桡骨骨折切开复位钢板内固定术;关节软骨修复术;桡骨植骨术
534	O205内外科病区	2024-09-21	2024-12-20	3582096	徐新东	男	61Y	颈部脊髓损伤	颈椎脱位;颈椎椎管狭窄;截瘫;肺部感染;肺实变;胸腔积液;咽部挫伤;创伤后伤口感染;腰椎骨折;高血压;脂肪肝;下肢静脉血栓形成	好转	程碧环	陈德准	陈德准	颅骨牵引术;前入路颈椎融合术;前入路颈椎间盘切除术;2-3个椎骨融合或再融合;金属脊椎融合物置入术;颈椎后路单开门椎管减压术;椎骨内固定术;脊柱内固定装置去除术;暂时性气管切开术;皮肤和皮下坏死组织切除清创术;空肠造口术;暂时性胃造口术;气管内插管
535	O205内外科病区	2024-10-24	2024-12-28	3585171	金克德	男	73Y	股四头肌腱断裂	急性失血性贫血;失血性休克;多处开放性伤口;大腿大隐静脉损伤;大腿皮感觉神经损伤;髂骨骨折;腰椎峡部裂;腰椎前移;腰骶椎间盘突出;低蛋白血症;胸腔积液;创伤后伤口感染;下肢静脉血栓形成;肘关节关节病;多发性脑梗死;骨质疏松	治愈	程碧环	庄荣	庄荣	股四头肌缝合术;创面封闭式负压引流术（VSD);皮肤缝合术;肌腱、血管、神经探查术;胸腔闭式引流术;胸腔闭式引流术;胸腔闭式引流术;胸腔闭式引流术
536	O206疼痛科	2024-05-19	2024-05-26	3505138	周维卿	男	71Y	骨质疏松伴有病理性骨折	双侧膝关节骨性关节病;帕金森病;贫血;下肢静脉肌间血栓形成	好转	占恭豪	王佩芳	黄茜茜	周围神经阻滞术;关节或韧带治疗性药物注射
537	O206疼痛科	2024-05-28	2024-05-29	3506194	张陈奎	男	70Y	股骨颈骨折	肺占位性病变;冠状动脉粥样硬化;主动脉瓣钙化;胃术后;肾结石;前列腺增生;下肢动脉粥样硬化;下肢静脉血栓形成;前列腺结石;由于其他原因而未进行操作	未愈	洪建军	张秀孟	张秀孟
538	O206疼痛科	2024-05-27	2024-06-04	3507858	曾显亮	男	69Y	腰椎骨折	高血压2级;肝回声不均;后天性肾囊肿;下肢静脉血栓形成	治愈	毛方敏	毛方敏	万峻莱	腰椎骨折球囊扩张成形术
539	O206疼痛科	2024-06-13	2024-06-18	3512406	翁珍菊	女	63Y	腰椎骨折L1	肺挫伤;肌腱和肌肉损伤;脊椎退行性病变;骨质疏松;脾囊肿;肾结石;下肢静脉血栓形成;心功能不全	治愈	林仲可	王胜	王胜	腰椎骨折切开复位内固定术;椎骨植骨术
540	O206疼痛科	2024-12-07	2024-12-16	3580562	瞿六娒	女	77Y	胸椎骨折	骨质疏松;腰椎退行性病变;高血压;陈旧性肺结核;肺肿物;多发性肝囊肿;下肢动脉粥样硬化;下肢静脉血栓形成	治愈	徐晖	徐晖	徐晖	胸椎骨折球囊扩张成形术;椎骨活组织检查
541	O206疼痛科	2024-12-19	2024-12-24	3583723	高美凤	女	83Y	腰椎骨折	胸椎骨折;骨质疏松;高血压;冠状动脉粥样硬化性心脏病;焦虑性抑郁症;胸椎退行性病变;腰椎退行性病变;腰椎侧弯;下肢静脉血栓形成	好转	毛方敏	毛方敏	潘翔翔	经皮椎体球囊扩张成形术
542	O208手外科	2024-05-07	2024-05-13	3501074	林超元	男	92Y	股骨颈骨折	肝占位性病变;下肢静脉血栓形成;腹腔淋巴结肿大;孤立性肺结节;肺大疱;胆囊结石伴胆囊炎;心包积液;胸腔积液;肺不张;结肠恶性肿瘤个人史;下肢动脉粥样硬化	治愈	陈龙	应晓洲	应晓洲	人工股骨头置换术;髋轴面，陶瓷与聚乙烯
543	O208手外科	2024-05-07	2024-05-29	3506054	李茂迁	男	59Y	骨折外固定装置的调整	胫骨上端骨折;陈旧性胫骨平台骨折;外踝骨折;低钾血症;陈旧性肋骨骨折;2型糖尿病;肝囊肿;后天性肾囊肿;肾结石;前列腺增生;下肢动脉粥样硬化;下肢静脉血栓形成	其他	李志杰	周飞亚	陶振宇	胫骨外固定装置去除术;胫骨骨折切开复位钢板内固定术;胫骨外固定术
544	O208手外科	2024-05-29	2024-07-10	3519652	李茂迁	男	59Y	胫骨骨折不连接	骨折畸形愈合;腓骨骨折累及踝关节;腓总神经损伤;骨质疏松;2型糖尿病;陈旧性肋骨骨折;前列腺增生;下肢动脉粥样硬化;下肢静脉肌间血栓形成;胫神经损伤	好转	李志杰	蒋宾	林康	胫骨截骨术;胫骨延长术;胫骨外固定装置去除术;胫骨死骨去除术;胫骨外固定术;应用环形外固定架系统;胫骨病损切除术
545	O208手外科	2024-08-09	2024-08-12	3532229	杨云夫	男	57Y	肱骨颈骨折	下肢静脉曲张伴有溃疡;下肢静脉肌间血栓形成;由于其他和未特指原因而使病人决定不进行操作	治愈	赵友明	赵友明	柯陈荣
546	O208手外科	2024-10-08	2024-10-15	3555941	王德楷	男	66Y	股骨颈骨折	下肢深静脉血栓形成;肺气肿合并肺大泡;肺肿物;脂肪肝;肝囊肿;前列腺结石	好转	陈龙	陈龙	白炳力	全髋关节置换;肾静脉造影;下腔静脉滤器置入术;髋关节滑膜切除术;髋轴面，陶瓷与陶瓷
547	O208手外科	2024-12-03	2024-12-28	3585401	刘成撰	男	76Y	足拇长伸肌腱断裂	踝关节骨折;开放性多发性足骨折;手术后切口感染;孤立性肺结节;肺气肿;肺大疱;下肢动脉粥样硬化;下肢静脉血栓形成;下肢静脉曲张;后天性肾囊肿;前列腺囊肿;贫血;低钠血症;心脏术后	治愈	李志杰	丁健	林大木	趾肌腱缝合术;创面封闭式负压引流术（VSD);皮肤和皮下坏死组织切除清创术;中厚皮片移植术;创面封闭式负压引流术（VSD);旋转皮瓣移植术
548	O209手外科	2024-04-26	2024-05-05	3498910	曾大毛	男	55Y	肱骨近端骨折	肋骨骨折;尾骨骨折;血气胸;腰椎退行性病变;肝钙化灶;前列腺结石;心功能不全;肺动脉高压;下肢静脉血栓形成;胸腔积液;胸壁挫伤;二尖瓣反流	治愈	陈星隆	吴志鹏	蔡海丰	肱骨骨折切开复位钢板内固定术
549	O209手外科	2024-06-02	2024-07-13	3520624	黄亦桃	女	68Y	骨折内固定物植入感染	胫腓骨闭合性骨折;下肢皮肤缺损;高血压;下肢静脉血栓形成;脂肪肝;肾结石	治愈	陈星隆	周飞亚	林大木	皮肤和皮下坏死组织切除清创术;皮肤和皮下坏死组织切除清创术;皮肤和皮下坏死组织切除清创术;骨空隙骨水泥填充术;骨空隙骨水泥填充术;骨空隙骨水泥填充术;创面封闭式负压引流术（VSD);创面封闭式负压引流术（VSD);创面封闭式负压引流术（VSD);皮瓣修整术;中厚皮片移植术
550	O209手外科	2024-08-29	2024-09-01	3540117	厉圣光	男	51Y	胫骨平台骨折	腘动脉损伤;胫神经损伤;腓总神经损伤;外踝骨折;肋骨骨折;2型糖尿病;下肢动脉粥样硬化;下肢静脉血栓形成;肺肿物	好转	冯永增	冯永增	王贤亮	胫骨骨折闭合复位螺钉内固定术;腘动脉缝合术;腘动脉取栓术;小腿减张术
551	O209手外科	2024-08-08	2024-09-14	3544645	郑春兰	女	67Y	单趾切断	开放性足骨折;足部皮肤撕裂伤;跖趾关节脱位;皮肤挫伤;颈椎间盘突出;下肢静脉血栓形成;老年性心脏瓣膜病;高血压;心功能不全;下肢皮肤撕裂伤	好转	陈星隆	周飞亚	周飞亚	断趾再植术;皮肤和皮下坏死组织切除清创术;趾截断术;皮瓣修整术;带蒂皮瓣移植术;创面封闭式负压引流术（VSD);创面封闭式负压引流术（VSD);创面封闭式负压引流术（VSD);趾关节脱位切开复位术;皮肤和皮下坏死组织切除清创术;足关节囊缝合术;副韧带修补术;皮肤缝合术
552	O209手外科	2024-08-16	2024-09-16	3545435	章连恩	男	76Y	趾骨骨折	开放性足损伤;腓神经损伤;老年性脑萎缩;后天性肾囊肿;肝囊肿;下腔静脉血栓形成;老年性心脏瓣膜病	治愈	陈星隆	周飞亚	周飞亚	趾骨骨折切开复位钢针内固定术;残端皮肤修整术;趾骨病损切除术;趾骨病损切除术;中厚皮片移植术;腓神经缝合术;创面封闭式负压引流术（VSD);创面封闭式负压引流术（VSD);皮瓣修整术;创面封闭式负压引流术（VSD);肌腱、血管、神经探查术;皮肤和皮下坏死组织切除清创术
553	O209手外科	2024-10-12	2024-10-16	3556158	杨秀芬	女	62Y	手部拇指伸肌腱损伤	桡骨远端骨折;陈旧性尺桡骨骨折;肺肿物;炎症后肺纤维化;心包积液;主动脉钙化;肝囊肿;下肢静脉血栓形成;左室扩大;升主动脉扩张;室间隔肥大;退行性主动脉瓣疾患;心功能不全;主动脉(瓣)关闭不全	治愈	蒋良福	王安远	罗祖程	上肢肌伸肘功能重建伴肌移位术
554	O209手外科	2024-10-22	2024-11-02	3563051	梅碎斌	男	66Y	手部指伸肌腱损伤	创伤后伤口感染;下肢动脉粥样硬化;下肢静脉肌间血栓形成;肝回声不均;膀胱纤维化;前列腺结石;左房扩大;心功能不全;肺大疱;主动脉钙化;肋骨多处骨折;肝囊肿	治愈	陈星隆	陈一衡	蔡海丰	皮肤和皮下坏死组织切除清创术;皮肤和皮下坏死组织切除清创术;手带蒂皮瓣移植术;手肌腱、血管、神经探查术;创面封闭式负压引流术（VSD);指关节囊缝合术
555	O209手外科	2024-09-25	2024-11-03	3563425	季敬龙	男	66Y	创伤后趾骨坏死	糖尿病;下肢静脉血栓形成;肝囊肿;胆囊息肉;后天性肾囊肿;肾结石;陈旧性肋骨骨折;孤立性肺结节	治愈	蒋良福	王安远	罗祖程	趾截断术;带蒂皮瓣修整术;跖骨内固定装置去除术
556	O209手外科	2024-11-12	2024-11-25	3572264	丁朝霞	女	60Y	肱骨外科颈骨折	肩关节半脱位;下肢静脉肌间血栓形成;多处挫伤;肾结石;二尖瓣反流;肋骨多处骨折	治愈	陈星隆	李士	蔡海丰	肱骨骨折切开复位钢板内固定术;肩袖修补术
557	O210脊柱外科	2024-04-26	2024-05-05	3498912	张香蕊	女	70Y	颈部脊髓损伤	颈椎间盘突出;颈椎骨折;颈椎椎管狭窄;颈椎后纵韧带骨化;胸腔积液;肝囊肿;下肢动脉粥样硬化;下肢静脉血栓形成	好转	黄其杉	田乃锋	周凯亮	颈椎后路单开门椎管减压术
558	O210脊柱外科	2024-05-13	2024-05-20	3503176	陈兰香	女	78Y	胸椎骨折	骨质疏松;脊椎前移;胸椎退行性病变;胸椎退行性病变;心房颤动;肺动脉高压;下肢动脉粥样硬化;下肢静脉血栓形成	治愈	徐晖	徐晖	陈泽新	胸椎骨折球囊扩张成形术
559	O210脊柱外科	2024-05-20	2024-05-28	3505759	朱景波	男	81Y	骨质疏松伴有病理性骨折	脊柱术后;肺气肿;下肢静脉血栓形成;脊椎退行性病变;脂肪瘤;后天性肾囊肿	治愈	徐晖	徐晖	陈泽新	腰椎骨折球囊扩张成形术
560	O210脊柱外科	2024-06-12	2024-06-19	3512911	杨彩华	女	65Y	胸椎骨折T11/T12	颈椎退行性病变;胸椎退行性病变;腰椎退行性病变;腰椎间盘突出;胸腔积液;腰背部挫伤;下肢静脉血栓形成;老年性心脏瓣膜病;胆囊结石;肾结石	治愈	黄其杉	黄其杉	周凯亮	胸椎骨折球囊扩张成形术
561	O210脊柱外科	2024-06-23	2024-07-01	3516539	黄三妹	女	81Y	骶骨骨折	胸椎骨折;腰椎术后;慢性阻塞性肺病伴有急性加重;肺大疱;肝胆管结石;下肢动脉粥样硬化;下肢静脉血栓形成;肾错构瘤;脑卒中后遗症;子宫内膜恶性肿瘤个人史;高血压;糖尿病;脂肪肝	治愈	田乃锋	田乃锋	周凯亮	经皮穿刺脊柱后凸成形术;椎骨活组织检查
562	O210脊柱外科	2024-06-26	2024-07-06	3518119	李珠花	女	86Y	骨质疏松伴有病理性骨折	脊椎退行性病变;肺部感染;冠状动脉粥样硬化;退行性主动脉瓣疾患;主动脉(瓣)关闭不全;慢性胃炎;甲状腺结节;脂肪肝;后天性肾囊肿;肾结石;锁骨下动脉粥样硬化;下肢动脉血栓形成	治愈	徐晖	徐晖	陈泽新	胸椎骨折球囊扩张成形术
563	O210脊柱外科	2024-06-28	2024-07-13	3520846	周成连	男	68Y	多发性腰椎骨折	腰骶椎间盘突出;腰椎椎管狭窄;高血压;慢性阻塞性肺病;肺动脉高压;下肢动脉粥样硬化;后天性肾囊肿;脂肪肝;肝囊肿;单侧腹股沟疝，不伴有梗阻或坏疽;老年性心脏病;肾超声检查异常;下肢静脉曲张;下肢静脉血栓形成;肝回声不均	治愈	倪文飞	吴爱悯	吴爱悯	腰椎骨折切开复位内固定术
564	O210脊柱外科	2024-07-30	2024-08-07	3530284	卢素清	女	53Y	颈部脊髓损伤	颈椎骨折C3;颈椎椎管狭窄;创伤性截瘫;肺挫伤;腹股沟挫伤;头皮血肿;头部的损伤;胸腔积液;下肢静脉血栓形成;脂肪肝	好转	田乃锋	田乃锋	周凯亮	前入路颈椎融合术;椎体次全切除伴椎间盘切除术;金属脊椎融合物置入术;2-3个椎骨融合或再融合
565	O210脊柱外科	2024-08-07	2024-08-12	3532098	叶加丰	男	81Y	骨质疏松伴有病理性骨折	室性期前收缩;肺钙化;间质性肺病;支气管扩张(症);肺部感染;肝囊肿;胆囊胆固醇沉着症;后天性肾囊肿;前列腺增生;下肢动脉粥样硬化;老年性心脏病;前列腺结石;下肢静脉血栓形成	治愈	倪文飞	吴爱悯	吴爱悯	胸椎骨折球囊扩张成形术;椎骨活组织检查
566	O210脊柱外科	2024-08-15	2024-08-23	3536377	陈章松	男	57Y	腰椎间盘突出	腰椎术后;腰椎退行性病变;骨折术后;脂肪肝;肺部阴影;下肢静脉血栓形成	治愈	田乃锋	田乃锋	周凯亮	腰椎椎体间融合术，后入路;2-3个椎骨融合或再融合;金属脊椎融合物置入术;后入路腰椎间盘切除术
567	O210脊柱外科	2024-08-20	2024-08-28	3538443	木凤英	女	74Y	胸椎骨折T11/T12	陈旧性胸椎骨折;胸椎退行性病变;腰椎退行性病变;重度骨质疏松;甲状腺术后;子宫术后;支气管哮喘;陈旧性肋骨骨折;高血压;2型糖尿病;脂肪肝;后天性肾囊肿;下肢动脉粥样硬化;下肢静脉血栓形成	治愈	黄其杉	黄其杉	周凯亮	胸椎骨折球囊扩张成形术
568	O210脊柱外科	2024-08-23	2024-09-11	3543676	叶玉娥	女	68Y	脊髓囊肿	病理性骨折，不可归类在他处者;腰椎间盘突出;人工髋关节;脑卒中后遗症;肺部感染;肝囊肿;心功能不全;脂肪肝;肾结石;后天性肾囊肿;胸椎术后;腰椎术后;下肢静脉血栓形成	好转	黄其杉	田乃锋	田乃锋	硬脊膜下病损切除术;胸椎椎板切除减压术;椎骨内固定术
569	O210脊柱外科	2024-09-22	2024-09-29	3550319	刘秋华	女	80Y	多发性腰椎骨折	胸椎骨折;骨质疏松伴有病理性骨折;高血压;弥漫大B细胞淋巴瘤;陈旧性肋骨骨折;下肢动脉粥样硬化;下肢静脉肌间血栓形成;主动脉钙化	治愈	徐晖	徐晖	徐晖	腰椎骨折球囊扩张成形术;胸椎骨折球囊扩张成形术;椎骨活组织检查
570	O210脊柱外科	2024-09-26	2024-10-08	3553367	邹嫦娟	女	65Y	腰椎骨折	胸椎骨折;胸部挫伤;骨质疏松;窦性心动过缓;股静脉血栓形成;肝囊肿;肺肿物;肝脂肪瘤	治愈	徐晖	徐晖	徐晖	腰椎骨折切开复位内固定术;胸椎骨折切开复位内固定术;腰椎植骨术
571	O210脊柱外科	2024-09-15	2024-10-12	3554584	谢银春	女	61Y	胸部脊髓损伤	胸椎多处骨折;急性截瘫;多发性腰椎骨折;肋骨多处骨折;肺部阴影;肺挫伤;脂肪肝;头皮血肿;真菌性上颌窦炎;心功能不全;下腔静脉血栓形成;高血压	好转	黄其杉	田乃锋	田乃锋	胸椎骨折切开复位内固定术;胸椎融合术，后入路;2-3个椎骨融合或再融合;胸椎骨折球囊扩张成形术;腰椎骨折球囊扩张成形术;胸椎椎板切除减压术
572	O210脊柱外科	2024-10-16	2024-10-23	3559275	胡松妹	女	82Y	骨质疏松伴有病理性骨折	脊柱术后;后天性肾囊肿;下肢静脉血栓形成;食管裂孔疝	治愈	倪文飞	吴爱悯	吴爱悯	胸椎骨折球囊扩张成形术;椎骨活组织检查
573	O210脊柱外科	2024-10-18	2024-10-26	3560321	张意昂	男	66Y	腰椎骨折L1	骨质疏松;下肢动脉粥样硬化;下肢静脉肌间血栓形成;肺肿物;肺气肿	治愈	黄其杉	田乃锋	田乃锋	腰椎骨折球囊扩张成形术
574	O210脊柱外科	2024-11-08	2024-11-18	3569593	邵领照	女	74Y	胸椎多处骨折	胸部脊髓损伤;创伤性截瘫;颈部脊髓损伤;肱骨干骨折;肱骨头骨折;肩关节脱位;肋骨多处骨折;胸腔积液;心功能不全;脂肪肝;老年性脑萎缩;肺肿物;下肢动脉粥样硬化;下肢静脉肌间血栓形成	治愈	黄其杉	田乃锋	田乃锋	胸椎骨折切开复位内固定术;胸椎融合术，后入路;4-8个椎骨融合或再融合;肱骨骨折切开复位钢板内固定术;肱骨植骨术;肩关节脱位手法整复术
575	O210脊柱外科	2024-12-08	2024-12-09	3577828	朱小映	女	51Y	腰椎骨折	下肢深静脉血栓形成;下肢静脉肌间血栓形成;脂肪肝;胆囊息肉	未愈	黄其杉	吴爱悯	吴爱悯
576	O210脊柱外科	2024-12-09	2024-12-26	3584688	吴细线	女	51Y	颈部脊髓损伤	颈椎椎管狭窄;尺骨骨折;2型糖尿病;脂肪肝;肺肿物;下肢静脉血栓形成	好转	倪文飞	许聪	许聪	颈椎后路单开门椎管减压术;椎骨内固定术
577	O211脊柱外科	2024-05-28	2024-05-30	3506368	陈爱华	女	70Y	骨质疏松伴有病理性骨折，其他的	胸椎骨折;腰椎间盘突出;胸椎退行性病变;肺部感染;胸腔积液;肝囊肿;下肢动脉粥样硬化;下肢静脉肌间血栓形成;心功能不全	好转	林仲可	林仲可	王胜	胸椎骨折球囊扩张成形术
578	O211脊柱外科	2024-07-18	2024-07-23	3524568	胡彩媚	女	70Y	骨质疏松伴有病理性骨折，其他的	腰椎峡部裂;胸椎骨折;糖尿病不伴有并发症;特发性肺纤维化;主动脉钙化;胸椎术后;下肢动脉粥样硬化;心功能不全;二尖瓣和主动脉瓣的疾患;下肢静脉肌间血栓形成;静脉疾患	好转	王向阳	盛孙仁	朱思品	胸椎骨折球囊扩张成形术
579	O211脊柱外科	2024-07-18	2024-07-24	3525016	郑爱英	女	77Y	腰椎压缩性骨折	腰椎前移;骨质疏松;帕金森病;高血压;心功能不全;脂肪肝;胆囊结石;后天性肾囊肿;下肢静脉肌间血栓形成	好转	林焱	林焱	许聪	腰椎骨折球囊扩张成形术
580	O211脊柱外科	2024-07-20	2024-08-05	3529396	尤良正	男	79Y	第二颈椎骨折	寰椎骨折;额骨骨折;足骨折;下肢深静脉血栓形成;下肢静脉肌间血栓形成;头部的损伤;开放性脑挫伤;脑萎缩;肺部感染;颈椎退行性病变;老年性心脏瓣膜病;脂肪肝;后天性肾囊肿;前列腺增生;前列腺结石;主动脉钙化;心功能不全;主动脉瓣钙化	治愈	林仲可	林仲可	林仲可	颈后入路寰枢椎复位内固定术;颈椎植骨术
581	O211脊柱外科	2024-08-11	2024-08-14	3533082	聂军	女	65Y	腰椎骨折	腰椎椎管狭窄;颈椎退行性病变;颈椎间盘突出;下肢深静脉血栓形成;宫颈恶性肿瘤;子宫切除术后状态;肾盂积水，其他的;输尿管扩张;下肢静脉肌间血栓形成	未愈	王向阳	盛孙仁	朱思品	下肢静脉造影
582	O211脊柱外科	2024-08-12	2024-08-18	3534604	陈启英	女	85Y	颈椎骨折	骨质疏松;下肢静脉肌间血栓形成;冠状动脉粥样硬化性心脏病;心房颤动;心力衰竭;肺动脉高压中度;肝血管瘤;肾错构瘤;胆囊结石;低钾血症	好转	毛方敏	万峻莱	万峻莱
583	O211脊柱外科	2024-08-25	2024-09-03	3540695	胡美翠	女	86Y	骨质疏松伴有病理性骨折，其他的	下肢静脉肌间血栓形成;脑梗死后遗症;胸椎骨折	好转	武垚森	王胜	王胜	胸椎骨折球囊扩张成形术
584	O211脊柱外科	2024-09-07	2024-09-22	3547430	卓士刚	男	57Y	颈椎骨折	胸椎多处骨折;肌腱和肌肉损伤;颅骨多发性骨折;骨折术后;下肢静脉血栓形成;肺挫伤;肺气肿合并肺大泡;肺肿物;胆囊内胆汁淤积;肝囊肿	治愈	王向阳	盛孙仁	盛孙仁	前入路颈椎融合术;颈椎间盘切除术;颈椎植骨术;后入路颈椎融合术;颈椎植骨术;金属脊椎融合物置入术;胸椎骨折切开复位内固定术
585	O211脊柱外科	2024-09-15	2024-09-25	3548660	吕尾珠	女	69Y	腰椎骨折	脊髓损伤;骨质疏松;头皮血肿;下肢静脉肌间血栓形成;脂肪肝;胆囊结石;主动脉弓钙化	治愈	武垚森	武垚森	王胜	腰椎骨折切开复位内固定术;腰椎椎体间融合术，后入路;黄韧带部分切除术;腰椎植骨术;腰椎椎板切除减压术
586	O211脊柱外科	2024-10-06	2024-10-10	3553792	姜兴	男	80Y	腰椎骨折L3	骨质疏松;腰椎间盘突出;阿尔茨海默病;下肢动脉粥样硬化;肝内胆管结石;后天性肾囊肿;前列腺增生;前列腺结石;肺部感染;特发性(原发性)高血压;2型糖尿病;下肢静脉肌间血栓形成;胫前动脉狭窄;腰椎前移	治愈	王向阳	盛孙仁	盛孙仁	腰椎骨折球囊扩张成形术;经皮椎骨成形术
587	O211脊柱外科	2024-11-01	2024-11-06	3564511	张招弟	女	81Y	骨质疏松伴有病理性骨折，其他的	腰椎骨折;高血压;糖尿病;肺肿物;肝囊肿;肝内钙化点;下肢静脉肌间血栓形成	好转	林仲可	林仲可	林仲可	腰椎骨折球囊扩张成形术;椎骨活组织检查
588	O211脊柱外科	2024-11-10	2024-11-15	3568164	吴香妹	女	77Y	胸椎压缩性骨折	腰椎压缩性骨折;骨质疏松;下肢静脉肌间血栓形成;高血压;多发性肝囊肿;下肢动脉粥样硬化;甲状腺结节;胆囊结石;陈旧性肋骨骨折;骨折术后	好转	王向阳	盛孙仁	盛孙仁	胸椎骨折球囊扩张成形术;椎骨活组织检查;经皮椎骨成形术;腰椎骨折球囊扩张成形术
589	O211脊柱外科	2024-11-30	2024-12-04	3575778	朱春兰	女	72Y	骨质疏松伴有病理性骨折，其他的	腰椎骨折L2;高血压;帕金森病;腰椎间盘突出;肺肿物;二尖瓣及主动脉瓣关闭不全;下肢动脉粥样硬化;下肢静脉血栓形成;脊柱侧弯;胸椎后凸	好转	盛孙仁	盛孙仁	盛孙仁	腰椎骨折球囊扩张成形术;椎骨活组织检查
590	O211脊柱外科	2024-12-07	2024-12-12	3578972	刘银柱	男	75Y	胸椎压缩性骨折	腰椎间盘变性;痛风;脂肪肝;肾结石;前列腺结石;肺部感染;下肢静脉肌间血栓形成	治愈	林焱	田乃锋	田乃锋	胸椎骨折球囊扩张成形术;椎骨活组织检查
591	O211脊柱外科	2024-12-07	2024-12-12	3578985	王凤花	女	73Y	骨质疏松伴有病理性骨折，其他的	腰椎压缩性骨折;腰椎退行性病变;胸椎退行性病变;肺肿物;肾盂积水;下肢静脉血栓形成;骨折术后	好转	林焱	田乃锋	田乃锋	腰椎骨折球囊扩张成形术;椎骨活组织检查
592	O211脊柱外科	2024-12-14	2024-12-28	3585049	武金鱼	女	68Y	腰椎间盘突出	脊柱侧弯;肺大疱;下肢动脉粥样硬化;下肢静脉肌间血栓形成;陈旧性胸椎骨折;眩晕;腰椎不稳定;老年性骨质疏松	好转	王向阳	盛孙仁	孙泽明	腰椎间盘切除伴椎板切除术;金属脊椎融合物置入术;腰椎椎体间融合术，后入路;2-3个椎骨融合或再融合;脊髓神经根粘连松解术;黄韧带部分切除术;腰椎植骨术
593	O303康复科	2024-04-30	2024-05-16	3501859	刘雪山	男	28Y	膝关节痛	骨折术后恢复期;下肢静脉肌间血栓形成;物理治疗，其他的	好转	蒋松鹤	林海燕2	庞琼怡	运动训练;关节松动法;电针治疗;超声波治疗;针灸
594	O303康复科	2024-04-23	2024-05-22	3503856	杨建沦	男	35Y	踝关节痛	骨折术后恢复期;面部软组织挫伤;物理治疗，其他的;跖趾关节脱位;坐骨神经损伤;四根以上肋骨骨折不伴第一肋骨骨折;面部软组织挫伤;乙型病毒性肝炎;下肢静脉肌间血栓形成	好转	蒋松鹤	郑余银	邹恩苗	针刺;运动训练;中药熏治;超声波治疗
595	O303康复科	2024-04-17	2024-05-27	3505285	朱维治	男	65Y	胸部脊髓功能损伤T12	骨折术后恢复期;运动障碍;皮肤感觉障碍;神经源性肠;神经源性膀胱;腰椎骨折;胸椎骨折;桡骨骨折;肋骨骨折;受压区压疮;肺挫伤;胸腔积液;创伤性蛛网膜下腔出血;膀胱造口状态;原发性双侧膝关节病;泌尿道感染;下肢静脉肌间血栓形成	好转	蒋松鹤	郑余银	郑力宇	骨盆外固定装置去除术;针灸;运动训练;骨创伤治疗仪使用;其他控制气压和空气成分的疗法;桡骨和尺骨置入装置去除
596	O303康复科	2024-05-05	2024-06-04	3507746	张香蕊	女	70Y	颈部脊髓损伤	四肢瘫痪;神经源性肠;神经源性膀胱;运动障碍;颈椎间盘突出;颈椎骨折;颈椎椎管狭窄;颈椎后纵韧带骨化;低钾血症;低钠血症;胸腔积液;肝囊肿;下肢动脉粥样硬化;下肢静脉肌间血栓形成;泌尿道感染;涉及使用其他康复操作的医疗	好转	蒋松鹤	林海燕2	高丽萍	运动训练;作业疗法;物理疗法;针灸
597	O303康复科	2024-04-04	2024-06-04	3507769	缪金岳	男	66Y	胸椎多处骨折	创伤性胸腔积液;多发性腰椎骨折;脊髓损伤;创伤性截瘫;脊髓病性膀胱;创伤性休克;下肢深静脉血栓形成;下肢静脉肌间血栓形成;腰部软组织损伤;创伤性湿肺;肺部感染;泌尿道感染;腔隙性脑梗死;颈椎间盘突出;腰椎间盘突出;胸椎退行性病变;骨质疏松;低蛋白血症;贫血;前列腺钙化灶	好转	蒋松鹤	林海燕2	高丽萍	针刺;物理疗法;电动起立床训练;截瘫肢体综合训练;运动训练;呼吸训练;胸椎融合术，后入路;胸椎骨折切开复位内固定术;2-3个椎骨融合或再融合;椎体脊椎融合装置的置入;呼吸机治疗[大于等于96小时];气管内插管;气管套管置换术;胸腔闭式引流术;气管镜肺泡灌洗术
598	O303康复科	2024-05-02	2024-06-18	3512421	汪月霞	女	83Y	股骨颈骨折	脑梗死;乳腺恶性肿瘤;乳腺术后;高尿酸血症;桡骨远端骨折;运动障碍;下肢动脉粥样硬化;下肢静脉肌间血栓形成;腔隙性脑梗死;脱髓鞘病;老年性脑萎缩;胆囊结石;后天性肾囊肿;肾钙化;糖尿病;泌尿道感染;原发性双侧膝关节病;高血压;涉及使用其他康复操作的医疗	治愈	蒋松鹤	林海燕2	高丽萍	偏瘫肢体综合训练;运动训练;康复评定;针刺;物理疗法;人工股骨头置换术;髋轴面，金属与聚乙烯;髋关节滑膜切除术
599	O303康复科	2024-05-08	2024-07-06	3518188	王佩秋	女	70Y	膝关节僵硬	胫骨平台伴腓骨骨折;股骨内髁骨折;膝内侧半月板损伤;膝关节外侧副韧带损伤;膝关节前十字韧带损伤;膝关节内侧副韧带损伤;大腿血肿;膝关节退行性病变;膝关节积液;下肢静脉肌间血栓形成;下肢动脉粥样硬化	好转	蒋松鹤	郑余银	邹恩苗	运动训练;关节松动法;物理疗法
600	O303康复科	2024-06-14	2024-07-14	3521110	田代伍	男	52Y	髋关节痛	骨折术后恢复期;脂肪肝;前列腺结石;高血压;下肢静脉肌间血栓形成	好转	蒋松鹤	郑余银	邹恩苗	运动训练;关节松动法;物理疗法
601	O303康复科	2024-06-22	2024-07-22	3524118	张香蕊	女	70Y	四肢瘫痪	运动障碍;颈部脊髓损伤;颈椎术后;颈椎间盘突出;颈椎骨折C7;颈椎椎管狭窄;颈椎后纵韧带骨化;肝囊肿;下肢静脉肌间血栓形成;腰椎压缩性骨折;腰骶椎间盘突出;肩胛下肌肌腱损伤;肩关节积液;肩滑囊炎;施莫尔结;冈上肌肌腱损伤;腰椎椎管狭窄	好转	蒋松鹤	林海燕2	吴登敏	偏瘫肢体综合训练;运动训练;作业疗法;电动起立床训练;物理疗法;中药熏治
602	O303康复科	2024-06-01	2024-07-25	3525347	蔡琼	男	37Y	腰椎骨折L2	马尾损伤;跟骨骨折;髌骨骨折;肱骨大结节骨折;关节僵硬;肋骨骨折;胫骨平台伴腓骨骨折;距骨骨折;足舟骨骨折;脂肪肝;精神分裂症;下肢深静脉血栓形成;肝功能检查的异常结果;中度贫血;腰椎椎管狭窄	治愈	蒋松鹤	郑余银	郑力宇	腰椎间盘切除伴椎板切除术;腰椎椎体间融合术，前入路;腰椎骨折切开复位内固定术;腰椎骨折切开复位内固定术;腰椎椎板切除减压术;跟骨骨折切开复位钢板内固定术;跟骨人工骨植骨术;关节软骨修复术;髌骨骨折切开复位张力带钢丝内固定术;交叉韧带的其他修补术
603	O303康复科	2024-06-29	2024-07-31	3527597	徐启茂	男	54Y	内踝骨折	创伤性蛛网膜下腔出血;踝关节半脱位;头皮血肿;脑血管瘤;颈椎间盘突出;特发性肺纤维化;头部的开放性伤口;脑挫伤;帕金森病;踝关节僵硬;甲状腺术后;下肢静脉肌间血栓形成	好转	蒋松鹤	郑余银	邹恩苗	关节软骨修复术;足部骨折手法整复术;运动训练;关节松动法;踝关节骨折切开复位钢板内固定术
604	O303康复科	2024-07-24	2024-08-07	3530160	郑爱英	女	77Y	老年性骨质疏松伴病理性骨折	腰椎压缩性骨折;脊椎前移;腰椎间盘突出;帕金森病;腰椎椎管狭窄;下肢静脉肌间血栓形成;脂肪肝;胆囊结石;后天性肾囊肿;肝结节;陈旧性胸椎骨折;脊柱骨软骨病;高血压;涉及使用其他康复操作的医疗	好转	蒋松鹤	林海燕2	高丽萍	物理疗法;运动训练
605	O303康复科	2024-07-15	2024-08-13	3532396	徐秀玉	女	75Y	运动障碍	吞咽困难;认知障碍;物理治疗，其他的;创伤性硬脑膜下血肿;胫骨上端骨折;肱骨上端骨折;肩胛骨骨折;锁骨骨折;胸骨骨折;肋骨多处骨折;髂骨骨折;髋臼骨折;骶骨骨折;耻骨骨折;高血压;下肢动脉粥样硬化;下肢深静脉血栓形成;肝囊肿;肾结石;颈椎间盘突出;高尿酸血症;高脂血症	好转	蒋松鹤	林海燕2	吴登敏	运动训练;作业疗法;物理疗法
606	O303康复科	2024-07-22	2024-08-21	3535633	陈茹	女	39Y	膝关节痛	膝关节僵硬;膝外侧半月板撕裂;半月板变性;膝关节内侧副韧带部分断裂;骨盆骨折;骶骨骨折;耻骨骨折;髋臼骨折;腰椎骨折L5;下肢静脉血栓形成;骨折术后;涉及使用其他康复操作的医疗	好转	蒋松鹤	林海燕2	吴登敏	运动训练;关节松动法;物理疗法;中药熏治
607	O303康复科	2024-07-21	2024-08-28	3538338	潘正瑛	女	57Y	关节僵硬	创伤性上肢切断后遗症;胸腔积液;下肢静脉肌间血栓形成;肺诊断性影像检查的异常所见;后天性肾囊肿;骨折术后;涉及使用其他康复操作的医疗	好转	蒋松鹤	郑余银	郑力宇	运动训练;关节松动法;作业疗法;低频脉冲电治疗;超声波联合治疗
608	O303康复科	2024-07-28	2024-09-08	3542389	何守增	男	64Y	髂骨骨折	髋臼骨折;耻骨骨折;髋关节僵硬;腹腔积液;膀胱憩室;肺气肿合并肺大泡;肺诊断性影像检查的异常所见;股静脉血栓形成;下肢静脉血栓形成;肝功能检查的异常结果;涉及使用其他康复操作的医疗	好转	蒋松鹤	卢君艳	郑力宇	关节软骨修复术;骨盆骨折切开复位钢板内固定术;骨盆骨折切开复位钢板内固定术;关节软骨修复术;运动训练;毫针刺法;低频脉冲电治疗
609	O303康复科	2024-07-13	2024-09-09	3542976	何细赖	男	71Y	腰椎间盘突出	胸椎骨折T5/T6;颈椎间盘变性，其他的;颈椎间盘突出;颈椎椎管狭窄;腰骶横突骨折;髋关节病;肺部感染;腰椎骨折;肺气肿合并肺大泡;肺诊断性影像检查的异常所见;肝囊肿;后天性肾囊肿;髂骨骨折;下肢静脉血栓形成;退行性主动脉瓣疾患;窦性心动过缓;涉及使用其他康复操作的医疗	好转	蒋松鹤	卢君艳	高丽萍	脊神经根阻滞术;毫针刺法;物理疗法
610	O303康复科	2024-08-31	2024-09-16	3545441	吴汝龙	男	65Y	创伤性截瘫	胸部脊髓损伤;神经源性膀胱;神经源性肠;运动障碍;腰椎骨折;腰椎间盘突出;血管瘤;肋骨骨折;胸腔积液;肺诊断性影像检查的异常所见;下肢静脉血栓形成;低钠血症;胸椎术后;涉及使用其他康复操作的医疗	好转	蒋松鹤	卢君艳	郑力宇	运动训练;毫针刺法;物理疗法;电动起立床训练;超声波联合治疗;截瘫肢体综合训练
611	O303康复科	2024-08-19	2024-09-24	3548341	赵思文	男	59Y	关节僵硬	尺骨桡骨闭合性骨折;肋骨骨折;髂骨骨折;胸腔积液;脂肪肝;下肢动脉粥样硬化;下肢静脉血栓形成;完全性右束支传导阻滞;痛风;涉及使用其他康复操作的医疗	好转	蒋松鹤	郑余银	金韵	运动训练;作业疗法;关节松动法;物理疗法;超声波联合治疗;低频脉冲电治疗
612	O303康复科	2024-09-22	2024-09-28	3549891	卓士刚	男	57Y	运动障碍	肋骨骨折;肌腱和肌肉损伤;下肢静脉血栓形成;肺挫伤;肺气肿合并肺大泡;肺诊断性影像检查的异常所见;胆囊内胆汁淤积;肝囊肿;骨折术后恢复期;涉及使用其他康复操作的医疗	好转	蒋松鹤	卢君艳	郑力宇	偏瘫肢体综合训练;作业疗法;低频脉冲电治疗;电动起立床训练;毫针刺法;运动训练
613	O303康复科	2024-09-07	2024-09-29	3550248	徐秀玉	女	75Y	运动障碍	认知障碍;胫骨骨折;肱骨骨折;肩胛骨骨折;锁骨骨折;胸骨骨折;肋骨骨折;骨盆骨折;髂骨骨折;髋臼骨折;骶骨骨折;耻骨骨折;特发性(原发性)高血压;高脂血症;下肢深静脉血栓形成;肺挫伤;肺血肿;吞咽困难;下肢动脉粥样硬化;脑外伤恢复期;肝囊肿;肾结石;颈椎间盘突出;胸椎间盘突出	好转	蒋松鹤	卢君艳	吴登敏	运动训练;作业疗法;物理疗法;毫针刺法
614	O303康复科	2024-09-09	2024-10-23	3559168	南卿妹	女	69Y	膝关节僵硬	单侧膝关节骨性关节病;肋骨多处骨折;趾骨骨折;下肢静脉血栓形成;胸腔积液;肝囊肿;急性牙周炎;手术后状态，其他特指的;涉及使用其他康复操作的医疗	好转	蒋松鹤	郑余银	邹恩苗	运动训练;关节松动法;低频脉冲电治疗;超声波联合治疗;中药熏治;物理疗法
615	O303康复科	2024-10-23	2024-10-28	3561249	余福寿	男	61Y	创伤性截瘫	颈部脊髓损伤;胸椎多处骨折;颈椎多处骨折;肺部感染;肩胛骨骨折;肋骨多处骨折;神经源性膀胱;神经源性肠;运动障碍;肋骨骨折;肺挫伤;低蛋白血症;贫血;麻痹性肠梗阻;下肢静脉血栓形成;多处皮肤浅表挫伤;手术后状态，其他特指的;涉及使用其他康复操作的医疗	好转	蒋松鹤	卢君艳	高丽萍	截瘫肢体综合训练;运动训练;物理疗法;毫针刺法
616	O303康复科	2024-09-22	2024-10-29	3561424	曹正青	男	55Y	创伤性截瘫	腰部脊髓损伤;腰椎间盘突出;髂骨骨折;髋臼骨折;骶骨骨折;肋骨多处骨折;多处皮肤浅表挫伤;胸腔积液;肺不张;肺气肿合并肺大泡;膈疝;后天性肾囊肿;前列腺增生;泌尿道感染;附睾炎;下肢静脉血栓形成;外侧半月板前角损伤;膝关节前十字韧带损伤;膝关节后十字韧带损伤;膝关节积液	好转	蒋松鹤	卢君艳	郑力宇	截瘫肢体综合训练;运动训练;物理疗法;毫针刺法;超声波联合治疗;中药熏治
617	O303康复科	2024-10-04	2024-11-06	3564415	蔡加星	男	40Y	创伤性截瘫	颈部脊髓损伤;神经源性膀胱;神经源性肠;运动障碍;颈椎滑脱;颈部挫伤;创伤性脑脊液漏;声带麻痹;颈部食管挫伤;肋骨多处骨折;骶骨骨折;胸腔积液;多处挫伤;下肢深静脉血栓形成;髂总动脉血栓形成;髂外静脉血栓形成;下肢静脉肌间血栓形成;泌尿道感染;肝功能检查的异常结果	好转	蒋松鹤	郑余银	邹恩苗	截瘫肢体综合训练;运动训练;作业疗法;针刺;电动起立床训练;超声波联合治疗;物理疗法
618	O303康复科	2024-11-09	2024-12-03	3575308	王银妹	女	89Y	髋关节僵硬	肝囊肿;胆囊结石;后天性肾囊肿;肾结石;下肢动脉粥样硬化;下肢静脉血栓形成;肺诊断性影像检查的异常所见;肺动脉高压中度;慢性咽炎;骨折术后;人工关节术后;涉及使用其他康复操作的医疗	好转	蒋松鹤	郑余银	邹恩苗	超声波联合治疗;运动训练;低频脉冲电治疗;关节松动法
619	O303康复科	2024-11-09	2024-12-10	3578242	周丕竹	男	75Y	四肢瘫痪	颈部脊髓损伤;神经源性膀胱;神经源性肠;颈椎骨折;胸椎骨折;颈椎退行性病变;颈椎间盘突出;颈椎脱位C5/C6;皮下血肿;眼球萎缩;2型糖尿病;胸腔积液;睾丸鞘膜积液;后天性肾囊肿;前列腺增生;前列腺钙化灶;腹腔积液;下肢静脉血栓形成;受压区压疮;颈椎椎管狭窄;泌尿道感染	好转	蒋松鹤	卢君艳	郑力宇	截瘫肢体综合训练;运动训练;作业疗法;针灸;电动起立床训练;物理疗法
620	O303康复科	2024-11-10	2024-12-11	3578592	虞叶胜	男	69Y	关节僵硬	多发性骨盆骨折;腓骨小头骨折;膝内侧半月板损伤;膝关节十字韧带损伤;膝关节外侧副韧带损伤;下肢撕脱伤;胸部损伤;创伤性膈疝;肋骨多处骨折;肺挫伤;创伤性胸腔积液;腹部损伤;创伤性肝破裂;腹腔内出血;头部的损伤;面部裂伤;唇裂伤;创伤性牙齿脱落;下肢静脉血栓形成;高血压	好转	蒋松鹤	郑余银	金韵	运动训练;关节松动法;低频脉冲电治疗;超声波联合治疗;物理疗法
621	O303康复科	2024-11-24	2024-12-31	3586386	张先亮	男	64Y	创伤性截瘫	胸部脊髓损伤;神经源性膀胱;神经源性肠;胸椎压缩性骨折;腰椎压缩性骨折;多发性腰椎骨折;肋骨多处骨折;主动脉钙化;冠状循环诊断性影像检查异常所见;创伤性胸腔积液;创伤性气胸;肠道感染;肾结石;后天性肾囊肿;前列腺结石;下肢静脉血栓形成;涉及使用其他康复操作的医疗	好转	蒋松鹤	卢君艳	郑力宇	截瘫肢体综合训练;运动训练;针灸;低频脉冲电治疗
首页	尾页
骨折+肺栓塞
序号	出院科室	入院日期	出院日期	病案号	病人	性别	年龄	主诊断	非主诊断	转归	主任	主治	住院	手术
					姓名					情况	医师	医师	医师	名称
1	D14呼吸内科二/风湿免疫	2024-09-30	2024-10-09	3553676	李春叶	女	72Y	急性肺栓塞	下肢深静脉血栓形成;脓毒血症;低钾血症;2型糖尿病;高血压;骨折术后;下肢动脉粥样硬化;退行性主动脉瓣疾患;二尖瓣及三尖瓣关闭不全;肺大疱;胸腔积液;脂肪肝;胰腺萎缩	好转	翁海霞	俞丽华	葛翔挺
2	F06(急ICU)	2024-03-14	2024-05-11	3500380	陈永华	男	57Y	大面积肺栓塞	呼吸衰竭;梗阻性休克;心脏停搏复苏成功;缺氧缺血性脑病;癫痫;肺部感染;下肢深静脉血栓形成;头皮血肿;肋骨骨折;肺大疱;肝囊肿;单纯性肾囊肿;胃麻痹;腰椎峡部裂	好转	孙来芳	孙来芳	王婷婷4
3	F06(急ICU)	2024-05-19	2024-05-20	3503338	吴小某	女	79Y	大面积肺栓塞	心脏停搏复苏成功;非感染性多器官功能障碍综合征(MODS);缺氧缺血性脑病;代谢性酸中毒;肺部感染;骨折术后;肋骨多处骨折;胸腔积液;肺不张;下腔静脉血栓形成;胆囊结石;脂肪肝;下肢动脉粥样硬化	未愈	孔万权	王征	王征	静脉穿刺术
4	H07老年康复	2024-04-30	2024-05-21	3503361	邵君平	男	47Y	腰椎骨折L3	马尾损伤;肺栓塞;耻骨骨折;腰椎间盘突出;乙型病毒性肝炎;创伤性湿肺;胸腔积液;腰椎椎管狭窄	好转	蒋松鹤	卢君艳	程博	针刺;电动起立床训练;截瘫肢体综合训练;运动训练
5	H08胸外	2024-11-13	2024-12-23	3583109	朱维光	男	82Y	肋骨多处骨折	支气管内异物;急性肺栓塞;纵隔气肿;腰骶横突骨折;胸椎横突骨折;创伤性气胸;急性呼吸衰竭（I型呼吸衰竭）;肺部感染;代偿性肺气肿;特发性(原发性)高血压;肺肿物;老年性脑萎缩;颈动脉硬化;脂肪肝;腔隙性脑梗死;下肢动脉粥样硬化;颈动脉狭窄	好转	章岳峰	章岳峰	陈凯	颈内静脉穿刺中心静脉置管术;呼吸机治疗[大于等于96小时];气管内插管;气管镜支气管异物取出术
6	H14呼吸内科	2024-01-11	2024-02-04	3478710	洪玉鸿	男	47Y	股骨多处骨折	肺部感染;肺栓塞;支气管哮喘;高血压;髌骨骨折;肋骨骨折	治愈		吴立琴		股骨骨折闭合复位螺钉内固定术
7	H14呼吸内科	2024-04-03	2024-04-11	3491434	叶秀兰	女	82Y	肺栓塞	阵发性心房颤动;颈动脉硬化;下肢动脉粥样硬化;后天性肾囊肿;肋骨骨折;胆囊结石	好转	翁海霞	翁海霞	李慧莹
8	H14呼吸内科	2024-04-28	2024-05-15	3501458	卜维春	男	40Y	肺栓塞	肺部感染;胸腔积液;骨折术后恢复期	好转	颜孙舜	颜孙舜	李慧莹
9	H15消化内科	2023-12-28	2024-01-10	3469663	夏素贞	女	90Y	消化道出血	食管静脉曲张破裂出血;肝硬化失代偿期;肺栓塞;肺部感染;纵隔淋巴结肿大;特发性(原发性)高血压;2型糖尿病;下肢动脉粥样硬化;陈旧性肋骨骨折	好转	夏宣平	闫峻	裴继华
10	H15消化内科	2024-01-05	2024-01-20	3474709	林志翔	男	68Y	食管恶性肿瘤	消化道出血;失血性休克;恶性肿瘤维持性化学治疗;肺栓塞;下肢深静脉血栓形成;粒细胞缺乏;肺部感染;后天性肾囊肿;肝囊肿;陈旧性肋骨骨折;腰骶椎间盘突出	死亡	王文星	胡定元	杨守醒	静脉注射化疗药物
11	H16血液内科	2024-08-18	2024-09-02	3540399	冯理登	男	71Y	肺恶性肿瘤	全身性广泛继发恶性肿瘤;肺栓塞;肺部感染;慢性顽固性疼痛;腰椎骨折;特发性(原发性)高血压;高血压性心脏病;高尿酸血症;腔隙性脑梗死;脑血管瘤;脑肿瘤;老年性脑萎缩;脑肿物;下肢动脉粥样硬化;肝囊肿;后天性肾囊肿	未愈	林颖	黄河2	方玮玥	超声引导下胸腔穿刺术;肺穿刺活检
12	N15心血管内科	2024-06-03	2024-06-12	3510655	汤三联	女	63Y	肺栓塞	冠状动脉粥样硬化性心脏病;腰椎间盘移位;腰椎压缩性骨折;骨质疏松;高脂血症;下肢动脉粥样硬化;脂肪肝;慢性肾功能不全;胆囊结石	好转	林丛	潘嘉林	陈晔
13	N16心血管内科	2024-08-17	2024-08-28	3538332	宋金娥	女	70Y	肺栓塞	心功能III级(NYHA分级);心房颤动;髂动脉血栓形成;肺部感染;2型糖尿病;高血压;脑梗死后遗症;下肢动脉粥样硬化;肺诊断性影像检查的异常所见;陈旧性肋骨骨折;肝功能不全	好转	王艳	李进	郑程
14	O303康复科	2024-06-05	2024-08-26	3537428	缪存坤	男	39Y	颈椎骨折C7	颈部脊髓损伤;颈椎脱位C6/C7;神经源性肠;颈椎棘突骨折;股骨粗隆间骨折;腰骶椎骨骨折;髂骨骨折;四肢瘫痪;肺栓塞;创伤性湿肺;手术后切口感染;泌尿道感染;肝功能检查的异常结果;脊髓病性膀胱	好转	蒋松鹤	郑余银	邹恩苗	后入路颈椎融合术;颈椎后路单开门椎管减压术;颈椎脱位切开复位内固定术;2-3个椎骨融合或再融合;颈椎骨折切开复位内固定术;椎体脊椎融合装置的置入;股骨骨折闭合复位髓内针内固定术;盆骨外固定术;应用单平面外固定架;呼吸机治疗[小于96小时];运动训练;物理疗法
首页	尾页
