# Supplementary material for: Variable Rate of D-dimer Predicts Venous Thromboembolism in Postoperative Fracture Patients: A Single-Center Retrospective Cohort Study
Source: Research Square preprint supplement (doi:10.21203/rs.3.rs-7878480/v1), 2025-12-09
Supplement: Supplementary file 5 [file 86240d440b9964e2777c8cd8.xlsx]

## Sheet: Sheet1
骨折+血栓
序号	出院科室	入院日期	出院日期	病案号	病人	性别	年龄	主诊断	非主诊断	转归	主任	主治	住院	手术
					姓名					情况	医师	医师	医师	名称
1	C03眼科口腔	2021-05-23	2021-05-26	3102494	高超	男	53Y	闭合性胫骨平台骨折	下肢静脉血栓形成;膝关节十字韧带扭伤;肾结石;膝外侧半月板损伤;膝关节副韧带扭伤	好转	余可和	余可和	卢晓郎
2	C03眼科口腔	2021-09-12	2021-09-18	3142286	林定洋	男	45Y	跟骨骨折	下肢静脉血栓形成;脂肪肝;前列腺结石	治愈	洪建军	周一飞	周一飞	股骨骨折闭合复位螺钉内固定术
3	C04综合病房	2020-12-09	2021-02-04	3065135	林津津	女	71Y	脱髓鞘性脊髓炎	骨质疏松伴病理性骨折;运动障碍;下腔静脉血栓形成;多发性脑梗死;高血压病;颈动脉硬化;下肢动脉粥样硬化;神经源性膀胱;脊柱侧弯;颈椎间盘突出	好转	刘宝华	刘宝华	钟燕彪
4	C04综合病房	2021-04-04	2021-04-27	3092690	李世荣	女	58Y	肠扭转	骨盆骨折;骨折治疗后恢复期;腰椎骨折;肋骨骨折;小肠憩室病;肠粘连;下肢深静脉血栓性静脉炎	治愈	吴伟军	吴伟军	吴伟军	肠粘连松解术;下肢静脉滤器置入术;小肠扭转复位术;下肢静脉造影;小肠病损切除术
5	C04综合病房	2021-02-16	2021-08-05	3126861	Я无名841	男	52Y	骨盆骨折	肠瘘;腹壁疝;腹膜损伤;髂外静脉血栓形成;截肢残端溃疡;肋骨骨折;髋臼骨折;骶骨骨折;关节瘘;失血性休克	治愈	杨越涛	杨越涛	闻浩	皮肤和皮下坏死组织切除清创术;皮肤和皮下组织切开引流术;回肠-降结肠吻合术;腹腔粘连松解术;乙状结肠瘘修补术;腹膜组织修补术;乙状结肠造口还纳术;骨盆切除术;皮肤和皮下组织血肿抽吸术;结肠造口扩大术;骨盆骨折闭合复位术;髋关节离断术;腹股沟探查术
6	C05疼痛科	2021-03-17	2021-03-30	3083149	程高元	男	82Y	腰椎椎管狭窄	腰椎间盘突出;非毒性多结节性甲状腺肿;膝关节炎;高血压病;腰椎骨折;下肢静脉血栓形成	好转	许峰	许峰	何伶俐
7	C06肿瘤放化疗、神经康复	2021-04-19	2021-05-19	3099960	董进花	女	71Y	脑梗死后遗症	2型糖尿病;肾积水伴肾结石;肺部感染;脓毒血症;偏瘫;由于活动能力降低而需要帮助;湿疹;药物性肝损害;念珠菌疹;颈内动脉闭塞;大脑中动脉闭塞;动脉粥样硬化;下肢静脉血栓形成;心律失常;房性早搏;腰椎退行性病变;骨折治疗后恢复期;膝关节强硬	好转	刘宝华	刘宝华	金翩翩
8	C06肿瘤放化疗、神经康复	2021-08-11	2021-08-23	3133316	邵正绍	男	81Y	脑梗死	偏瘫;进食障碍;由于活动能力降低而需要帮助;慢性肾衰竭;轻度贫血;肺部感染;高血压病;心功能不全;颈动脉硬化;动脉粥样硬化;下肢动脉粥样硬化;下肢静脉血栓形成;静脉石;胸椎骨折;腰椎骨折;肋骨骨折;肺挫伤;冠状动脉支架植入后状态;肾结石	好转	刘宝华	刘宝华	217115	深静脉穿刺;经外周静脉穿刺中心静脉插管术[PICC]
9	C06肿瘤放化疗、神经康复	2021-10-13	2021-11-07	3159208	卢汝富	男	71Y	脑出血	慢性支气管炎;下肢特指深部脉管静脉炎和血栓性静脉炎;偏瘫;进食障碍;肱骨骨折;言语障碍;高血压病;泌尿道感染;下肢动脉粥样硬化	好转	刘宝华	刘宝华	胡晓晓	股静脉穿刺术;下腔静脉滤器置入术
10	C06肿瘤放化疗、神经康复	2021-12-12	2021-12-20	3173926	董进花	女	71Y	多发性脑梗死	言语障碍;吞咽困难;偏瘫;动脉粥样硬化;颈内动脉闭塞;大脑中动脉闭塞;大脑中动脉狭窄;颈内动脉狭窄;胫前动脉狭窄;锁骨下动脉粥样硬化;下肢静脉炎和血栓性静脉炎;高血压病;2型糖尿病性周围神经病;房性早搏;腰椎退行性病变;陈旧性尺桡骨骨折	好转	刘宝华	刘宝华	吕德钊
11	C07泌尿	2020-12-05	2021-01-13	3058019	牟加福	男	76Y	前列腺增生	特指手术后状态;下腔静脉滤器血栓形成;骨折治疗后恢复期	治愈	竺海波	饶大庞	王怡君	经尿道前列腺气化电切术[TEVAP手术]
12	C10感染内科	2020-12-17	2021-01-12	3057721	蒋明正	男	41Y	胸椎骨折	胸腔积液;下肢静脉血栓形成;截瘫;精神分裂症;开放性多发性损伤;脊柱骨折;肾结石;脊髓损伤;肺挫伤;椎管狭窄;胆囊息肉;药物性肝炎	治愈	诸葛璐	郑毅	李杰	后入路胸腰椎融合术;胸椎植骨术;胸椎椎板切除减压术
13	C10感染内科	2021-04-12	2021-04-24	3091159	陈爱丽	女	78Y	肺部感染	2型糖尿病;下肢静脉血栓形成;后天性脑穿通畸形;骨折治疗后恢复期;下肢动脉粥样硬化	好转	诸葛璐	方佩佩2	李杰
14	C10感染内科	2021-08-17	2021-08-29	3135542	叶正国	男	80Y	肺部感染	泌尿道感染;血管性痴呆;颈动脉硬化;锁骨下动脉粥样硬化;多发性脑梗死;高血压病;陈旧性肋骨骨折;椎动脉粥样硬化;下肢动脉粥样硬化;下肢静脉血栓形成;特指手术后状态	好转	诸葛璐	李杰	217134
15	C10感染内科	2021-11-21	2021-12-27	3176274	王连连	女	61Y	大肠杆菌败血症	皮肤和皮下组织特指局部感染;子宫钙化;肺部感染;褥疮;低蛋白血症;缺铁性贫血;2型糖尿病;神经源性膀胱;高血压病;骨折治疗后恢复期;睡眠障碍;动脉粥样硬化;下肢静脉血栓形成;子宫平滑肌瘤;泌尿道感染	好转	潘陈为	方佩佩2	林秀珍	胸腔闭式引流术
16	D06(ICU)	2021-04-03	2021-04-10	3087032	陈岩翠	女	88Y	多发性脑梗死	股骨粗隆间骨折;高血压病;下肢静脉血栓形成;下肢动脉粥样硬化;2型糖尿病	未愈	程碧环	程碧环	王本极	股骨骨折切开复位髓内针内固定术
17	D06(ICU)	2021-04-11	2021-04-18	3089503	尤良元	男	90Y	感染性胃肠炎	多发性肝囊肿;脂肪肝;下肢动脉硬化闭塞症;骨折治疗后恢复期;感染性休克;心脏骤停;腔隙性脑梗死;脑梗死后遗症;多发性脑梗死;高血压病;高血压性心脏病;房性早搏;完全性右束支传导阻滞;慢性阻塞性肺病;下肢动脉血栓形成;颈动脉硬化;前列腺结石	死亡	龚裕强	张晓隆	张晓隆
18	D06(ICU)	2021-04-22	2021-05-19	3100398	徐式娒	男	77Y	肺出血	髌骨骨折;下肢深静脉血栓形成;下肢动脉粥样硬化;特指手术后状态;凝血障碍;肺部感染;胸腔积液;急性肾衰竭;高血压病;前列腺增生	好转	程碧环	郭献阳	郭献阳
19	D06(ICU)	2021-10-18	2021-10-22	3153969	程成朱	男	63Y	颈部脊髓损伤	急性四肢瘫;多发性颈椎骨折;强直性脊柱炎;下肢动脉粥样硬化;下肢深静脉血栓形成	未愈	戴凌燕	戴凌燕	傅蓓蓓	颅骨牵引
20	D06(ICU)	2021-11-30	2021-12-14	3172193	林秀兰	女	96Y	股骨粗隆间骨折	心脏停搏复苏成功;胸腔积液;高钠血症;肾衰竭;多发性肋骨骨折;下肢动脉粥样硬化;肝囊肿;胆囊结石;胆囊胆固醇沉着症;胫前动脉狭窄;肺气肿;下肢深静脉血栓形成	好转	龚裕强	戴凌燕	傅蓓蓓	股骨骨折闭合复位髓内针内固定术
21	D07儿童骨科、骨盆外科	2020-12-26	2021-01-05	3055487	邵进铸	男	80Y	股骨粗隆间骨折	膀胱结石;骨质疏松;多发性脑梗死;后天性肾囊肿;老年性脑萎缩;高血压病;脑积水;下肢静脉血栓形成	治愈	翁益民	翁益民	柯陈荣	股骨骨折闭合复位螺钉内固定术
22	D07儿童骨科、骨盆外科	2020-12-21	2021-01-05	3055493	徐永明	男	45Y	股骨干骨折	头部外伤;下肢静脉血栓形成	治愈	孔建中	孔建中	陈墨川	股骨骨折闭合复位髓内针内固定术;股静脉穿刺术;下腔静脉滤器置入术
23	D07儿童骨科、骨盆外科	2020-12-26	2021-01-09	3056702	林永库	男	76Y	骨盆骨折	骨质疏松;下肢动脉粥样硬化;前列腺增生;下肢静脉血栓形成	治愈	孔建中	翁益民	柯陈荣	骨盆重建术
24	D07儿童骨科、骨盆外科	2021-01-06	2021-01-19	3060289	杨秀花	女	50Y	跟骨骨折	下肢静脉血栓形成	治愈	孔建中	孔建中	陈墨川	跟骨骨折切开复位钢板内固定术;皮肤和皮下组织非切除性清创;跟骨植骨术
25	D07儿童骨科、骨盆外科	2021-01-22	2021-01-30	3064384	方光张	男	48Y	闭合性胫骨平台骨折	下肢静脉血栓形成	治愈	孔建中	孔建中	陈墨川	胫骨骨折切开复位钢针内固定术;胫骨植骨术;关节软骨修复术
26	D07儿童骨科、骨盆外科	2021-02-09	2021-02-20	3070256	戴晓芬	女	61Y	胫骨下端骨折	下肢动脉粥样硬化;肾结石;外踝骨折;脂肪肝;下肢静脉血栓形成	治愈	翁益民	翁益民	柯陈荣	踝关节骨折切开复位钢板内固定术;胫骨骨折切开复位螺钉内固定术
27	D07儿童骨科、骨盆外科	2021-02-19	2021-02-27	3072753	陈南京	女	84Y	股骨粗隆间骨折	下肢动脉粥样硬化;心房颤动;高血压病;后天性肾囊肿;胫后动脉狭窄;胫前动脉狭窄;多发性脑梗死;肝钙化灶;下肢静脉血栓形成	治愈	孔建中	孔建中	陈墨川	股骨骨折闭合复位髓内针内固定术
28	D07儿童骨科、骨盆外科	2021-02-15	2021-02-27	3072871	倪美珠	女	80Y	股骨颈骨折	下肢动脉粥样硬化;胆囊结石;高血压病;2型糖尿病;下肢静脉血栓形成;下肢动脉狭窄	治愈	孔建中	孔建中	陈墨川	全髋关节置换术;髋关节滑膜切除术
29	D07儿童骨科、骨盆外科	2021-03-15	2021-04-03	3084298	张碎竹	女	92Y	股骨粗隆下骨折	2型糖尿病;下肢动脉粥样硬化;下肢静脉血栓形成;脂肪肝;肝囊肿;骨质疏松;高血压病	治愈	翁益民	翁益民	柯陈荣	股骨骨折闭合复位钢针内固定术;下腔静脉滤器置入术;股静脉穿刺术
30	D07儿童骨科、骨盆外科	2021-03-29	2021-04-12	3087169	叶阿香	女	81Y	股骨颈骨折	神经痛;高血压病;腔隙性脑梗死;颈动脉硬化;下肢静脉血栓形成;下肢动脉粥样硬化;焦虑状态;卵巢囊肿;锁骨下动脉粥样硬化	治愈	翁益民	翁益民	柯陈荣	人工股骨头置换术
31	D07儿童骨科、骨盆外科	2021-04-03	2021-04-17	3088915	刘碎英	女	76Y	股骨颈骨折	桡骨骨折;老年性脑萎缩;增殖型肺结核;下肢动脉粥样硬化;肺钙化;脂肪肝;胆囊结石;乙型病毒性肝炎;下肢静脉血栓形成	治愈	孔建中	孔建中	陈墨川	人工股骨头置换术
32	D07儿童骨科、骨盆外科	2021-04-27	2021-05-10	3096753	胡许娒	女	94Y	股骨粗隆间骨折	梅毒;后天性肾囊肿;下肢动脉粥样硬化;下肢静脉血栓形成;静脉石;退行性主动脉瓣疾患;二尖瓣返流;心功能不全;胫前动脉狭窄	治愈	孔建中	孔建中	陈墨川	股骨骨折闭合复位钢针内固定术
33	D07儿童骨科、骨盆外科	2021-05-03	2021-05-15	3098453	金丹弟	女	75Y	股骨粗隆间骨折	高血压病;颈动脉硬化;腰椎滑脱;骨质疏松;下肢静脉血栓形成	治愈	孔建中	孔建中	陈墨川	股骨骨折闭合复位钢针内固定术
34	D07儿童骨科、骨盆外科	2021-04-29	2021-05-17	3099156	吴君伍	男	90Y	股骨粗隆间骨折	下肢动脉粥样硬化;下肢静脉血栓形成;后天性肾囊肿;多发性肝囊肿	治愈	翁益民	翁益民	柯陈荣	股骨骨折切开复位髓内针内固定术;下腔静脉滤器置入术;股静脉穿刺术
35	D07儿童骨科、骨盆外科	2021-05-03	2021-05-19	3099824	方陈女	女	68Y	骨盆骨折	肺挫伤;脂肪肝;高血压病;糖尿病;下肢动脉粥样硬化;肋骨骨折;下肢静脉血栓形成;股骨干骨折	治愈	孔建中	孔建中	陈墨川	骨盆骨折切开复位螺钉内固定术;股骨骨折切开复位髓内针内固定术;骨盆外固定架固定术
36	D07儿童骨科、骨盆外科	2021-05-26	2021-06-07	3106177	邓伦顶	男	87Y	股骨颈骨折	高血压病;多发性肝囊肿;后天性肾囊肿;胫前动脉狭窄;前列腺增生;下肢动脉粥样硬化;下肢静脉血栓形成	治愈	孔建中	孔建中	陈墨川	髋关节滑膜切除术;人工股骨头置换术
37	D07儿童骨科、骨盆外科	2021-06-02	2021-06-29	3113417	胡志领	男	70Y	开放性胫腓骨干骨折	特指手术后状态;高血压病;跖骨骨折;下肢静脉血栓形成	治愈	翁益民	翁益民	柯陈荣	股静脉穿刺术;下腔静脉滤器置入术;胫骨骨折切开复位钢针内固定术
38	D07儿童骨科、骨盆外科	2021-05-31	2021-07-04	3115376	王道影	男	33Y	骶骨骨折	下肢静脉血栓形成;脂肪肝;胆汁淤积症;骨盆骨折;腰骶神经根损伤;肱骨髁间骨折;尺骨桡骨远端骨折;创伤性胸腔积液	治愈	孔建中	孔建中	陈墨川	桡骨骨折切开复位钢针内固定术;后入路腰椎融合术;下肢静脉造影;下肢静脉滤器置入术;肱骨骨折切开复位钢板内固定术;股静脉穿刺术;肱骨植骨术;腰椎椎板切除减压术;骨盆外固定架固定术;桡骨植骨术;关节软骨修复术
39	D07儿童骨科、骨盆外科	2021-07-05	2021-07-17	3119924	黄孔样	男	61Y	跖骨骨折	肺结节;肺气肿;肝血管瘤;肝回声不均;下肢静脉血栓形成	治愈	翁益民	翁益民	柯陈荣	跖骨骨折切开复位钢针内固定术
40	D07儿童骨科、骨盆外科	2021-07-02	2021-07-17	3120065	傅冬长	男	52Y	跟骨骨折	前列腺囊肿;下肢静脉血栓形成;肾结石;小肾	治愈	孔建中	孔建中	陈墨川	创面负压封闭引流[VSD];跟骨植骨术;关节软骨修复术;跟骨骨折切开复位钢针内固定术
41	D07儿童骨科、骨盆外科	2021-07-14	2021-07-21	3121683	王秋华	女	70Y	股骨粗隆间骨折	脑梗死后遗症;高血压病;下肢动脉粥样硬化;下肢静脉血栓形成;股骨颈骨折	治愈	孔建中	孔建中	陈墨川	下腔静脉滤器置入术;股静脉穿刺术;下肢静脉造影;股骨骨折闭合复位钢针内固定术
42	D07儿童骨科、骨盆外科	2021-07-17	2021-07-24	3122616	杨永贵	男	61Y	外踝骨折	肌腱和肌肉损伤;冠状动脉粥样硬化性心脏病;下肢静脉血栓形成	好转	孔建中	孔建中	陈墨川
43	D07儿童骨科、骨盆外科	2021-09-23	2021-09-29	3146357	薛光云	男	58Y	股骨颈骨折	下肢动脉粥样硬化;高血压病;后天性肾囊肿;下肢静脉血栓形成	治愈	孔建中	胡炜	陈墨川	股骨骨折闭合复位钢针内固定术
44	D07儿童骨科、骨盆外科	2021-10-21	2021-11-04	3158273	陈筱筱	女	58Y	髋臼骨折	肝肿物;多发性肝囊肿;耻骨骨折;髋关节脱位;骶骨骨折;尺骨桡骨远端骨折;创伤性蛛网膜下腔出血;多发性肋骨骨折;创伤性气胸;腰椎骨折;特指手术后状态;下肢静脉血栓形成	治愈	孔建中	胡炜	陈墨川	髋骨骨折切开复位钢针内固定术;髋关节脱位闭合复位术;下腔静脉滤器置入术;股静脉穿刺术;骨盆骨折切开复位钢针内固定术
45	D07儿童骨科、骨盆外科	2021-11-01	2021-11-17	3162676	林陈香	女	80Y	股骨干骨折	跟骨骨折;骰骨骨折;楔状骨骨折(足);骨质疏松;足骨折;下肢动脉粥样硬化;下肢静脉血栓形成;胆囊结石;肺部感染	治愈	翁益民	翁益民	柯陈荣	下腔静脉滤器置入术;股骨植骨术;股骨骨折切开复位钢板内固定术;股静脉穿刺术
46	D07儿童骨科、骨盆外科	2021-11-13	2021-11-23	3164665	李冬梅	女	83Y	股骨颈骨折	高血压病;2型糖尿病;下肢动脉硬化闭塞症;下肢静脉血栓形成;脂肪肝	治愈	孔建中	胡炜	陈墨川	髋关节滑膜切除术;全髋关节表面置换术
47	D07儿童骨科、骨盆外科	2021-12-19	2021-12-21	3174332	李珠兰	女	88Y	股骨粗隆间骨折	老年性痴呆;下肢静脉血栓形成;下肢动脉粥样硬化;后天性肾囊肿;室性早搏	未愈	翁益民	翁益民	王特
48	D07儿童骨科、骨盆外科	2021-12-07	2021-12-21	3174352	薛思棉	男	58Y	髋臼骨折	髌骨骨折;下肢静脉血栓形成;单纯性肾囊肿	治愈	孔建中	孔建中	陈墨川	关节软骨修复术;骨盆骨折切开复位钢针内固定术;髋骨骨折切开复位钢针内固定术
49	D07儿童骨科、骨盆外科	2021-12-13	2021-12-22	3174720	黄银富	男	83Y	股骨粗隆间骨折	下肢静脉血栓形成;高血压病;血小板减少症;Ⅰ度房室传导阻滞;完全性右束支传导阻滞;胆囊息肉;下肢动脉粥样硬化;胫后动脉狭窄	好转	孔建中	孔建中	陈墨川	股骨骨折闭合复位钢针内固定术
50	D07儿童骨科、骨盆外科	2021-12-19	2021-12-29	3176971	金林妹	女	70Y	髌骨骨折	下肢静脉血栓形成	治愈	孔建中	孔建中	陈墨川	关节软骨修复术;髌骨骨折切开复位螺钉内固定术
51	D08(骨病)	2020-12-27	2021-01-03	3054856	董爱华	女	93Y	股骨粗隆间骨折	下肢动脉粥样硬化;下肢静脉血栓形成	治愈	张宇	薛恩兴	陈成旺	股骨骨折切开复位螺钉内固定术
52	D08(骨病)	2021-01-17	2021-01-25	3063113	马碎柳	女	82Y	股骨颈骨折	甲状腺肿;下肢静脉血栓形成;甲状腺钙化;颈部局部肿胀、肿物和肿块	治愈	张宇	薛恩兴	林一木	人工股骨头置换术
53	D08(骨病)	2020-12-31	2021-02-09	3066547	徐德法	男	69Y	半月板损伤	胸椎骨折;胸腔积液;蜂窝织炎;颈椎骨折;肋骨骨折;腹部损伤;颈部脊髓损伤;头部外伤;蛛网膜下腔出血;颈椎间盘突出;颈椎椎管狭窄;膝关节十字韧带扭伤;膝关节副韧带扭伤;高血压病;肌腱和肌肉损伤;原发性单侧膝关节病;胸部损伤;下肢静脉血栓形成	治愈	胡月正	胡月正	胡月正	全膝关节表面置换术;膝关节滑膜切除术
54	D08(骨病)	2021-02-03	2021-02-13	3067813	王金和	男	66Y	股骨粗隆间骨折	下肢动脉粥样硬化;脑梗死后遗症;胆囊结石;高血压病;前列腺增生;脂肪肝;下肢静脉血栓形成;心房肥大	治愈	张宇	薛恩兴	林一木	股骨骨折闭合复位钢针内固定术
55	D08(骨病)	2021-02-18	2021-03-03	3074114	王美香	女	79Y	股骨粗隆间骨折	高血压病;下肢静脉血栓形成;下肢动脉粥样硬化	治愈	胡月正	余华晨	许心弦	股骨骨折闭合复位髓内针内固定术
56	D08(骨病)	2021-07-07	2021-07-14	3119057	王阿花	女	81Y	股骨粗隆间骨折	原发性单侧膝关节病;下肢静脉血栓形成;高血压病;2型糖尿病;下肢动脉粥样硬化;肾结石;后天性肾囊肿;胸腔积液;恶性肿瘤手术后随诊检查	好转	张宇	陈成旺	林一木
57	D08(骨病)	2021-08-29	2021-09-15	3141400	叶丽华	女	82Y	股骨粗隆间骨折	下肢静脉血栓形成;下肢动脉粥样硬化	治愈	薛恩兴	薛恩兴	张学磊	股骨骨折闭合复位钢针内固定术
58	D08(骨病)	2021-09-21	2021-10-30	3156318	陈捷	女	79Y	股骨颈骨折	脓毒血症;感染性休克;泌尿道感染;肺部感染;下肢静脉血栓形成;心功能不全;肾结石;下肢动脉粥样硬化;胸腔积液	治愈	张宇	陈成旺	柳海晓	全髋关节表面置换术
59	D08(骨病)	2021-10-20	2021-10-31	3156763	应惠芬	女	75Y	三踝骨折	冠状动脉介入治疗后随诊检查;高血压病;下肢动脉粥样硬化;冠状动脉粥样硬化性心脏病;下肢静脉血栓形成	治愈	翁益民	翁益民	柯陈荣	踝关节融合术;踝关节韧带修补术;踝关节骨折切开复位钢针内固定术
60	D08(骨病)	2021-10-30	2021-11-07	3159197	林阿英	女	80Y	髌骨骨折	高血压病;下肢静脉血栓形成;下肢动脉粥样硬化;心功能不全;脂肪肝	治愈	张宇	陈成旺	张学磊	髌骨骨折切开复位螺钉内固定术
61	D08(骨病)	2021-11-21	2021-11-30	3167168	陈祥花	女	78Y	股骨颈骨折	高血压病;肝回声不均;下肢动脉粥样硬化;下肢静脉血栓形成;肝血管瘤;下肢静脉曲张	治愈	胡月正	胡月正	林一木	髋关节滑膜切除术;人工股骨头置换术
62	D08(骨病)	2021-11-24	2021-12-04	3168639	金连弟	女	94Y	股骨颈骨折	下肢动脉粥样硬化;下肢静脉血栓形成;心功能不全;退行性主动脉瓣疾患;老年性脑萎缩;二尖瓣返流;后天性肾囊肿	治愈	张宇	陈成旺	张学磊	人工股骨头置换术
63	D08(骨病)	2021-12-01	2021-12-13	3171666	宋汉弟	男	80Y	病理性骨折	冠状动脉粥样硬化性心脏病;不稳定性心绞痛;心功能Ⅱ级;退行性主动脉瓣疾患;后天性肾囊肿;冠状动脉介入治疗后随诊检查;下肢动脉粥样硬化;下肢静脉血栓形成;二尖瓣返流;多发性骨髓瘤	治愈	张宇	陈成旺	张学磊	人工股骨头置换术
64	D08(骨病)	2021-12-06	2021-12-18	3173211	赵如英	女	90Y	股骨颈骨折	胸腔积液;下肢动脉粥样硬化;下肢静脉血栓形成;多发性脑梗死;老年性脑萎缩;骨质疏松;脊柱侧弯;肝囊肿;脾大;后天性肾囊肿;贫血;肝钙化灶;慢性骨髓增生性疾病;高血压病;呼吸衰竭;低蛋白血症;肋骨骨折	治愈	胡月正	胡月正	柳海晓	髋关节滑膜切除术;人工股骨头置换术
65	D09(创伤1)	2020-12-09	2021-01-03	3055051	吴爱珠	女	72Y	胫腓骨干骨折	踝骨闭合性骨折;桡骨上端骨折;2型糖尿病;静脉栓塞和血栓形成;股骨髁骨折;肋骨骨折;髌骨骨折;跟骨骨折	治愈	陈龙	陈龙	陈龙	胫骨骨折切开复位钢针内固定术;股静脉穿刺置管术;桡骨骨折闭合复位钢板内固定术
66	D09(创伤1)	2020-12-27	2021-01-11	3057703	林秀容	女	89Y	股骨颈骨折	下肢静脉血栓形成;高血压病	治愈	汤骏	吴剑彬	吴剑彬	股骨骨折闭合复位钢针内固定术;股静脉穿刺术;下腔静脉滤器置入术
67	D09(创伤1)	2020-12-23	2021-01-20	3061014	陈福初	男	49Y	股骨特指部位骨折	特指手术后状态;下肢静脉血栓形成;髌骨骨折;前列腺结石;头皮裂伤	治愈	赵友明	赵友明	张学磊	股骨骨折闭合复位髓内针内固定术;皮肤和皮下组织非切除性清创
68	D09(创伤1)	2021-02-02	2021-02-10	3067093	王碎妹	女	84Y	股骨粗隆间骨折	动脉粥样硬化;下肢静脉血栓形成	治愈	洪建军	余洋	余洋	股骨骨折闭合复位髓内针内固定术
69	D09(创伤1)	2021-02-20	2021-03-09	3076298	林牡丹	女	77Y	髂骨骨折	多处挫伤;特指手术后状态;腰椎骨折;肋骨骨折;胸腔积液;静脉栓塞和血栓形成;耻骨骨折;肺挫伤;胆囊结石;卵巢囊肿;输卵管囊肿	好转	杨雷	杨雷	应晓洲
70	D09(创伤1)	2021-03-10	2021-03-21	3080270	朱如流	男	60Y	膝关节副韧带扭伤	膝关节十字韧带扭伤;半月板撕裂，近期的;坏疽;心房颤动;创伤性牙齿脱落;脱髓鞘性脑病;胆囊结石;后天性肾囊肿;多发性小腿损伤;肌腱和肌肉损伤;肝回声不均;陈旧性肋骨骨折;下肢静脉血栓形成	治愈	赵友明	赵友明	周玉龙	下肢韧带缝合术
71	D09(创伤1)	2021-03-23	2021-04-05	3085111	苏德春	女	54Y	肱骨上端骨折	脂肪肝;下肢静脉血栓形成;特指趾骨骨折;闭合性胫骨平台骨折	治愈	杨雷	余贤斌	余贤斌	肱骨骨折闭合复位钢板内固定术
72	D09(创伤1)	2021-03-25	2021-04-10	3086640	单娒儿	女	83Y	髌骨骨折	静脉栓塞和血栓形成;下肢动脉粥样硬化;2型糖尿病;高血压病;尺骨茎突骨折;桡骨下端骨折	治愈	赵友明	赵友明	周玉龙	髌骨骨折闭合复位空心钉内固定术
73	D09(创伤1)	2021-04-07	2021-04-17	3089040	吴寿翠	女	41Y	膝关节副韧带扭伤	多发性膝关节损伤;乙肝表面抗原携带者;胫骨上端骨折;下肢静脉血栓形成;后天性肾囊肿	治愈	汤骏	吴剑彬	吴剑彬	副韧带修补术
74	D09(创伤1)	2021-04-14	2021-05-05	3095369	王来珍	男	81Y	股骨粗隆间骨折	前列腺增生;后天性肾囊肿;肝囊肿;原发性单侧髋关节病;重度贫血;膀胱结石;高血压病;急性肾炎综合征，弥漫性膜性肾小球肾炎;下肢动脉粥样硬化;下肢静脉血栓形成	治愈	陈龙	陈龙	应晓洲	全髋关节置换术
75	D09(创伤1)	2021-05-02	2021-05-15	3098587	鲁冬来	女	60Y	肱骨上端骨折	下肢静脉血栓形成;脂肪肝;肝钙化灶;胆囊息肉;肱骨干骨折	治愈	汤骏	吴剑彬	吴剑彬	肱骨骨折切开复位钢针内固定术;股骨骨折闭合复位螺钉内固定术
76	D09(创伤1)	2021-05-17	2021-06-12	3107726	杨正祥	男	66Y	股骨下端骨折	失血性休克;下肢静脉血栓形成;髌骨骨折;胫骨上端骨折;颅腔积气;肺挫伤;后天性上肢和下肢缺失;蜂窝织炎;肌腱和肌肉损伤;下肢皮肤套脱伤	好转	赵友明	赵友明	赵友明	股骨骨折切开复位钢针内固定术;皮肤和皮下组织切开引流术;唇裂伤缝合术;同种皮肤移植术;皮肤和皮下组织非切除性清创;髌骨骨折切开复位螺钉内固定术;胫骨骨折切开复位钢针内固定术
77	D09(创伤1)	2021-06-08	2021-06-22	3111273	李宝丹	女	88Y	股骨粗隆间骨折	骨折不连接;下肢静脉血栓形成;下肢动脉粥样硬化;下肢动脉硬化闭塞症	治愈	陈龙	陈龙	应晓洲	股骨骨折闭合复位钢针内固定术
78	D09(创伤1)	2021-06-10	2021-06-26	3112629	邹竹妹	女	93Y	股骨粗隆间骨折	下肢静脉血栓形成;肺部感染;下肢动脉粥样硬化;主动脉瓣疾患;心功能不全;开放性尺骨桡骨远端骨折	治愈	杨雷	余贤斌	余贤斌	股骨骨折闭合复位钢针内固定术
79	D09(创伤1)	2021-06-23	2021-07-06	3116152	张华	男	54Y	股骨骨折	肱骨上端骨折;肺部感染;多发性肋骨骨折;静脉栓塞和血栓形成;创伤性硬膜外血肿;下肢静脉血栓形成	治愈	陈龙	陈龙	应晓洲	下肢静脉滤器置入术;静脉穿刺术;股骨骨折闭合复位钢针内固定术
80	D09(创伤1)	2021-06-30	2021-07-11	3117875	张彦付	男	63Y	股骨粗隆间骨折	下肢静脉血栓形成;主动脉瓣肥厚;心功能不全;主动脉瓣关闭不全	治愈	汤骏	吴剑彬	吴剑彬	下腔静脉滤器置入术;股静脉穿刺术;股骨骨折闭合复位髓内针内固定术
81	D09(创伤1)	2021-06-26	2021-07-11	3117895	沈凤英	女	83Y	股骨粗隆间骨折	静脉栓塞和血栓形成;高血压病	治愈	陈龙	陈龙	应晓洲	股骨骨折切开复位钢针内固定术
82	D09(创伤1)	2021-07-03	2021-07-17	3119994	杨正祥	男	64Y	股骨下端骨折	髌骨骨折;下肢静脉血栓形成;肺挫伤;后天性肾囊肿;胫骨上端骨折;多处挫伤;多发性面骨骨折;颅腔积气	治愈	赵友明	赵友明	郭伟军	胫骨骨折闭合复位螺钉内固定术;股骨骨折闭合复位螺钉内固定术
83	D09(创伤1)	2021-07-19	2021-08-05	3127024	王秀贞	女	75Y	股骨颈骨折	腔隙性脑梗死;下肢动脉粥样硬化;阿尔茨海默病性痴呆;高血压病;特指肾盂积水;腹股沟斜疝;脑卒中后遗症;室性早搏;下肢静脉血栓形成;2型糖尿病	治愈	杨雷	余贤斌	余贤斌	人工股骨头置换术
84	D09(创伤1)	2021-07-24	2021-08-07	3127527	陶大春	男	65Y	股骨颈骨折	糖尿病;下肢静脉血栓形成;高血压病	治愈	陈龙	陈龙	应晓洲	全髋关节置换术
85	D09(创伤1)	2021-08-01	2021-08-14	3130005	黄春妹	女	75Y	股骨粗隆间骨折	胆囊息肉;骨质疏松;后天性肾囊肿;下肢静脉血栓形成;脂肪肝;下肢动脉粥样硬化;高血压病;肝囊肿;肾结石	治愈	陈龙	陈龙	应晓洲	股骨骨折闭合复位髓内针内固定术
86	D09(创伤1)	2021-08-07	2021-08-16	3130943	郑桂珍	男	50Y	闭合性胫骨平台骨折	多发性胸椎骨折;特指趾骨骨折;下肢静脉血栓形成;脂肪肝	治愈	陈龙	陈龙	应晓洲	椎弓根钉内固定术;胫骨骨折切开复位钢板内固定术
87	D09(创伤1)	2021-08-11	2021-08-24	3133900	胡阿花	女	82Y	股骨骨折	下肢静脉血栓形成;高血压病;胆囊结石	治愈	杨雷	余贤斌	余贤斌	下腔静脉支架置入术;股静脉穿刺术;股骨骨折闭合复位钢针内固定术
88	D09(创伤1)	2021-09-23	2021-10-11	3149593	王兰香	女	66Y	股骨下端骨折	掌骨骨折;眼睑挫伤;指关节脱位;多发性肋骨骨折;头皮挫伤;特指听觉异常;下肢动脉粥样硬化;下肢静脉血栓形成;外伤性牙齿缺失	好转	赵友明	赵友明	郭伟军	股静脉穿刺术;股骨骨折切开复位钢针内固定术
89	D09(创伤1)	2021-10-20	2021-10-30	3156333	林红翠	女	78Y	桡骨下端骨折	下肢静脉血栓形成;胆囊息肉;肺结节;肝钙化灶	治愈	陈龙	陈龙	陈龙	桡骨骨折切开复位钢板内固定术
90	D09(创伤1)	2021-11-23	2021-11-30	3167327	陆国稔	男	79Y	股骨粗隆下骨折	肺结节;高血压病;下肢动脉粥样硬化;大隐静脉曲张;肝囊肿;后天性肾囊肿;肺部感染;颧骨骨折;下肢特指深部脉管静脉炎和血栓性静脉炎;前列腺钙化灶	治愈	陈龙	陈龙	应晓洲	股骨骨折闭合复位螺钉内固定术;下腔静脉滤器置入术;股静脉穿刺术
91	D09(创伤1)	2021-11-26	2021-12-05	3168957	胡正彩	女	51Y	跖骨骨折	外踝骨折;脂肪肝;心功能不全;特指跗骨骨折;静脉栓塞和血栓形成	治愈	杨雷	周一飞	张月雷	跖骨骨折切开复位钢针内固定术
92	D09(创伤1)	2021-12-10	2021-12-23	3175240	黄阿碎	女	82Y	股骨粗隆间骨折	高血压病;脑血管病后遗症;下肢动脉血栓形成;动脉粥样硬化	治愈	汤骏	吴剑彬	吴剑彬	下腔静脉造影;股静脉穿刺术
93	D09(创伤1)	2021-12-26	2021-12-29	3177367	王永斋	男	93Y	股骨粗隆间骨折	下肢动脉粥样硬化;下肢静脉血栓形成;肝钙化灶;前列腺结石;后天性肾囊肿	治愈	杨雷	周一飞	张月雷	股骨骨折闭合复位螺钉内固定术
94	D10(创伤2)	2020-12-29	2021-01-09	3056648	吕金媚	女	68Y	股骨颈骨折	下肢静脉血栓形成	治愈	陈华	孙辽军	蔡乐益	全髋关节置换术
95	D10(创伤2)	2020-12-23	2021-01-14	3058700	侯兴有	男	64Y	跖骨骨折	下肢静脉血栓形成;前列腺增生;前列腺囊肿;手术后皮肤坏死;后天性上肢和下肢缺失	治愈	黄义星	黄义星	张儒	指皮肤游离移植术
96	D10(创伤2)	2021-01-01	2021-01-21	3061342	杨玉兴	男	47Y	胫腓骨干骨折	下肢静脉血栓形成;肾结石;头皮挫伤;脂肪肝;胆囊结石	治愈	黄义星	黄义星	张儒	下腔静脉滤器置入术;胫骨骨折切开复位术;下肢静脉造影
97	D10(创伤2)	2021-01-20	2021-02-08	3066069	李作健	男	78Y	足挤压伤	动脉粥样硬化;特指趾骨骨折;后天性肾囊肿;静脉栓塞和血栓形成;跖骨骨折;前列腺增生	治愈	黄义星	黄义星	张儒	皮肤和皮下坏死组织切除清创术;皮肤和皮下组织血肿抽吸术
98	D10(创伤2)	2021-01-22	2021-02-08	3066073	王秀连	女	85Y	股骨颈骨折	膝关节病;下肢静脉炎和血栓性静脉炎;老年性骨质疏松;下肢动脉粥样硬化;慢性支气管炎;胸腔积液;肺部感染;脂肪肝;胆囊息肉	治愈	石成弟	石成弟	项光恒	人工股骨头置换术
99	D10(创伤2)	2021-02-03	2021-02-13	3067786	潘翠玉	女	60Y	闭合性胫骨平台骨折	下肢动脉粥样硬化;下肢动脉栓塞和血栓形成	治愈	黄义星	黄义星	张儒	胫骨骨折切开复位术
100	D10(创伤2)	2021-02-01	2021-02-20	3070426	徐光妹	女	71Y	股骨骨折	腰椎退行性病变;膝关节病;2型糖尿病;静脉栓塞和血栓形成;肋骨骨折	好转	黄俊武	王鉴顺	王鉴顺	股骨骨折切开复位术
101	D10(创伤2)	2021-02-16	2021-02-27	3072681	金唐娒	男	85Y	股骨粗隆间骨折	肺部感染;心力衰竭;胸腔积液;静脉栓塞和血栓形成;风湿性二尖瓣狭窄伴关闭不全;特指三尖瓣疾病;下肢动脉粥样硬化;心房颤动	治愈	黄义星	黄义星	张儒
102	D10(创伤2)	2021-04-02	2021-04-13	3087796	周洪翠	女	78Y	肱骨上端骨折	股骨干骨折;下消化道出血;陈旧性腰椎骨折;人工髋关节;骨质疏松;高血压病;下肢动脉粥样硬化;静脉栓塞和血栓形成	治愈	黄义星	黄义星	张儒	股骨骨折切开复位术;肱骨骨折切开复位术;静脉穿刺术;下肢静脉造影
103	D10(创伤2)	2021-04-06	2021-04-14	3088009	毛祥炼	男	77Y	股骨粗隆间骨折	肺特指疾患;胸腔积液;下肢静脉血栓形成;前列腺结石;下肢动脉粥样硬化;肺气肿	治愈	陈华	孙辽军	孙辽军	股骨骨折切开复位术
104	D10(创伤2)	2021-04-02	2021-04-17	3088817	林美英	女	68Y	股骨粗隆间骨折	肱骨上端骨折;骨质疏松;心房颤动;脂肪肝;心包积液;下肢特指深部脉管静脉炎和血栓性静脉炎;肾结石;心功能不全	治愈	黄义星	黄义星	张儒	股骨骨折切开复位术
105	D10(创伤2)	2021-04-10	2021-04-21	3090493	梁莹英	女	90Y	肱骨上端骨折	高血压病;2型糖尿病;膝关节病;静脉栓塞和血栓形成;胆囊结石;后天性肾囊肿;下肢动脉粥样硬化;肺结节	治愈	陈华	孙辽军	孙辽军	人工肱骨头置换术
106	D10(创伤2)	2021-04-12	2021-04-24	3091358	李美月	女	88Y	股骨粗隆间骨折	下肢特指深部脉管静脉炎和血栓性静脉炎;胸腔积液;下肢动脉粥样硬化	治愈	黄义星	黄义星	张儒	下腔静脉滤器置入术;股静脉穿刺术;股骨骨折切开复位术
107	D10(创伤2)	2021-04-10	2021-04-25	3091882	陈玉林	女	59Y	胫腓骨干骨折	半月板损伤;膝关节十字韧带扭伤;多发性下肢浅表损伤;静脉栓塞和血栓形成;脂肪肝;高血压病;髌骨骨折;膝关节副韧带扭伤	好转	陈华	孙辽军	孙辽军	韧带修补术;胫骨骨折切开复位术;腓骨骨折闭合复位术
108	D10(创伤2)	2021-04-15	2021-04-27	3092570	倪美钗	女	73Y	胫骨骨折	股骨骨折;腓骨骨折;人工髋关节;下腔静脉血栓形成;特指手术后状态;膝关节病;骨质疏松	好转	黄俊武	王鉴顺	王鉴顺	胫骨骨折切开复位术
109	D10(创伤2)	2021-04-08	2021-04-28	3092884	何文勋	男	69Y	踝骨闭合性骨折	特指手术后状态;静脉栓塞和血栓形成	治愈	陈华	孙辽军	孙辽军	踝关节骨折切开复位术
110	D10(创伤2)	2021-05-05	2021-05-17	3099014	陶女	女	83Y	股骨颈骨折	下肢静脉血栓形成	治愈	黄义星	黄义星	张儒	下肢静脉滤器置入术;股静脉穿刺术;下肢静脉造影
111	D10(创伤2)	2021-05-03	2021-05-19	3099887	戴强华	男	68Y	闭合性胫骨平台骨折	下肢动脉血栓形成;脂肪肝;前列腺增生;下肢动脉粥样硬化;肠易激综合征	好转	黄俊武	王鉴顺	王鉴顺	胫骨骨折切开复位术;韧带修补术;下肢静脉滤器置入术;股静脉穿刺术
112	D10(创伤2)	2021-05-19	2021-05-24	3101664	王刘花	女	84Y	股骨颈骨折	肾萎缩;肝囊肿;下肢动脉粥样硬化;下肢静脉血栓形成;痴呆	治愈	黄义星	黄义星	张儒
113	D10(创伤2)	2021-05-22	2021-06-02	3104450	黄祥齐	男	49Y	胫骨骨干骨折	前列腺结石;后天性肾囊肿;肾结石;脂肪肝;下肢静脉血栓形成;高血压病	治愈	陈华	孙辽军	孙辽军	股骨骨折切开复位术
114	D10(创伤2)	2021-05-26	2021-06-07	3106056	林金顺	男	56Y	骨盆骨折	特指手术后状态;下肢动脉粥样硬化;下肢静脉血栓形成;胆汁淤积症	治愈	陈华	孙辽军	孙辽军	骨盆骨折切开复位钢板内固定术
115	D10(创伤2)	2021-05-29	2021-06-08	3106433	毛玉梅	女	81Y	肱骨上端骨折	2型糖尿病;脂肪肝;高血压病;下肢静脉血栓形成;后天性肾囊肿	治愈	陈华	孙辽军	孙辽军	肱骨骨折切开复位术
116	D10(创伤2)	2021-05-30	2021-06-11	3107369	曾春媚	女	58Y	闭合性胫骨平台骨折	小腿水平腓神经损伤;小腿水平胫神经损伤;静脉栓塞和血栓形成;皮肤和皮下组织局部感染;腘动脉损伤	好转	石成弟	石成弟	蔡乐益
117	D10(创伤2)	2021-06-01	2021-06-19	3109972	陈忠益	男	55Y	骨盆骨折	肺不张;髋臼骨折;耻骨骨折;腹水;下肢静脉血栓形成;脂肪肝;胸腔积液	好转	黄俊武	王鉴顺	王鉴顺	下腔静脉滤器置入术;下肢静脉造影
118	D10(创伤2)	2021-06-13	2021-06-26	3112389	周生	男	59Y	锁骨骨折	肋骨骨折;下肢静脉血栓形成;胸腔积液;肾结石	好转	黄俊武	王鉴顺	王鉴顺	锁骨骨折切开复位术
119	D10(创伤2)	2021-06-13	2021-06-28	3113316	齐小娥	女	62Y	股骨颈骨折	高血压病;下肢动脉粥样硬化;下肢静脉血栓形成	治愈	陈华	孙辽军	孙辽军	全髋关节置换术
120	D10(创伤2)	2021-06-16	2021-06-30	3111518	陈满女	女	70Y	闭合性胫骨平台骨折	腓骨骨折;头痛;2型糖尿病;后天性肾囊肿;下肢静脉血栓形成	治愈	陈华	孙辽军	孙辽军	胫骨骨折切开复位术
121	D10(创伤2)	2021-06-24	2021-07-01	3114306	周建华	男	46Y	胫腓骨闭合性骨折	下肢静脉血栓形成;前列腺结石;胆囊息肉;肝回声不均	好转	石成弟	石成弟	蔡乐益
122	D10(创伤2)	2021-06-24	2021-07-09	3117081	沈爱华	女	72Y	股骨颈骨折	老年性脑萎缩;肺大泡;静脉栓塞和血栓形成;高血压病;2型糖尿病;多发性脑梗死	好转	黄俊武	王鉴顺	王鉴顺	人工股骨头置换术
123	D10(创伤2)	2021-07-05	2021-07-14	3119183	周多光	男	68Y	膝关节副韧带扭伤	四头肌和肌腱损伤;膝关节十字韧带扭伤;髌骨脱位;静脉栓塞和血栓形成;肋骨骨折;前列腺结石;后天性肾囊肿	好转	黄俊武	王鉴顺	王鉴顺	髌韧带缝合术;副韧带修补术
124	D10(创伤2)	2021-07-09	2021-07-24	3122450	李玲玲	女	60Y	股骨颈骨折	静脉栓塞和血栓形成;动脉粥样硬化;肝病;慢性乙型病毒性肝炎;心包积液	好转	黄俊武	王鉴顺	王鉴顺	全髋关节置换术
125	D10(创伤2)	2021-07-25	2021-08-02	3125591	王玉翠	女	82Y	股骨颈骨折	肾结石;后天性肾囊肿;静脉栓塞和血栓形成;人工髋关节;高血压病	治愈	陈华	孙辽军	孙辽军	人工股骨头置换术
126	D10(创伤2)	2021-07-22	2021-08-02	3125611	滕美华	女	64Y	肱骨上端骨折	髌骨骨折;静脉栓塞和血栓形成;头部外伤;结膜出血;肝病;慢性支气管炎;眼睑挫伤;高血压病	好转	黄俊武	王鉴顺	王鉴顺	肱骨骨折切开复位术
127	D10(创伤2)	2021-08-10	2021-08-15	3130359	黄樟其	男	60Y	足挤压伤	外踝骨折;下肢浅表损伤;肌腱损伤;皮肤挫伤;下肢特指深部脉管静脉炎和血栓性静脉炎;后天性肾囊肿;下肢动脉粥样硬化;跖骨骨折;特指趾骨骨折	好转	黄俊武	王鉴顺	王鉴顺	皮肤和皮下组织血肿抽吸术;皮肤和皮下坏死组织切除清创术
128	D10(创伤2)	2021-08-10	2021-08-17	3131176	陈芝亨	男	70Y	股骨粗隆间骨折	乙型病毒性肝炎;肝病;脾大;中度贫血;下肢静脉血栓形成;肺尘埃沉着病;凝血障碍;下肢动脉粥样硬化;肺动脉高压轻度;肾结石;后天性肾囊肿;血液化学特指异常所见	好转	黄义星	黄义星	方文来
129	D10(创伤2)	2021-08-05	2021-08-24	3133799	陈克长	男	41Y	股骨粗隆下骨折	下肢静脉血栓形成;乙型肝炎小三阳	治愈	陈华	孙辽军	217096	股静脉穿刺术;下腔静脉滤器置入术;股骨骨折切开复位术
130	D10(创伤2)	2021-08-23	2021-09-06	3138268	肖花妹	女	82Y	股骨颈骨折	创伤性胸腔积液;肺部感染;下肢动脉粥样硬化;高血压病;下肢静脉血栓形成;下肢动脉硬化闭塞症	治愈	黄义星	黄义星	项光恒	下腔静脉滤器置入术;股静脉穿刺术;下肢静脉造影;人工股骨头置换术
131	D10(创伤2)	2021-09-03	2021-09-13	3140560	傅岳英	女	80Y	尺骨骨折	慢性支气管炎;桡骨骨折;肱骨骨折;下肢特指深部脉管静脉炎和血栓性静脉炎;下肢动脉粥样硬化;肘关节脱位;骨质疏松;肋骨骨折	好转	黄俊武	黄俊武	王鉴顺	副韧带修补术;肱骨骨折切开复位术;尺骨骨折切开复位术
132	D10(创伤2)	2021-09-02	2021-09-16	3141577	林碎香	女	61Y	股骨骨折	下肢静脉血栓形成	治愈	石成弟	余贤斌	余贤斌	股骨骨折切开复位术
133	D10(创伤2)	2021-09-11	2021-09-21	3143303	张爱月	女	66Y	开放性足损伤	跖骨骨折;下肢静脉血栓形成;脂肪肝;胆囊息肉	好转	黄俊武	王鉴顺	王鉴顺	皮肤和皮下坏死组织切除清创术
134	D10(创伤2)	2021-09-15	2021-09-25	3144476	王瑜珍	女	62Y	髌骨骨折	下肢静脉血栓形成;高血压病	治愈	陈华	孙辽军	王特	髌骨骨折切开复位术
135	D10(创伤2)	2021-09-19	2021-09-25	3144488	季昌德	男	70Y	股骨粗隆间骨折	2型糖尿病;胆囊息肉;后天性肾囊肿;肾结石;前列腺增生;股动脉狭窄;下肢静脉血栓形成;高血压病	好转	陈华	孙辽军	王特
136	D10(创伤2)	2021-09-22	2021-10-09	3148823	倪雪英	女	82Y	股骨粗隆间骨折	肺部感染;桡骨下端骨折;下肢动脉粥样硬化;下肢静脉血栓形成;肝囊肿	好转	黄义星	黄义星	项光恒	股骨骨折闭合复位术
137	D10(创伤2)	2021-09-20	2021-10-16	3151358	赖福英	女	76Y	股骨颈骨折	下肢静脉血栓形成;肱骨上端骨折;慢性肾衰竭;下肢动脉粥样硬化;心功能不全;肺动脉高压重度;二尖瓣返流;三尖瓣疾病	好转	黄俊武	王鉴顺	王鉴顺	人工股骨头置换术;髋关节脱位闭合复位术
138	D10(创伤2)	2021-10-09	2021-10-19	3152394	陈兰香	女	68Y	股骨骨折	骨折治疗后恢复期;高血压病;2型糖尿病;下腔静脉血栓形成;动脉粥样硬化;完全性右束支传导阻滞	好转	黄义星	黄义星	项光恒	股骨内固定物取出术
139	D10(创伤2)	2021-10-17	2021-10-25	3154392	王花柳	女	81Y	股骨粗隆间骨折	下肢静脉血栓形成;下肢动脉粥样硬化;脂肪肝;2型糖尿病	治愈	陈华	孙辽军	王特	股骨骨折切开复位术
140	D10(创伤2)	2021-10-19	2021-10-28	3155681	梁云法	男	50Y	距骨骨折	跟骨骨折;骰骨骨折;跖骨骨折;下肢静脉血栓形成;前列腺结石	治愈	陈华	孙辽军	王特	距骨骨折切开复位钢板内固定术
141	D10(创伤2)	2021-10-16	2021-10-30	3156098	阮关林	男	84Y	股骨粗隆间骨折	高血压病;下肢动脉粥样硬化;下肢静脉血栓形成;肺部感染;肺气肿	好转	黄义星	黄义星	项光恒	股骨骨折切开复位术
142	D10(创伤2)	2021-09-01	2021-10-31	3156601	潘满钗	女	69Y	踝骨闭合性骨折	2型糖尿病;高血压病;多发性肝囊肿;后天性肾囊肿;距骨骨折;下肢静脉血栓形成	治愈	陈华	孙辽军	王特	中厚皮片移植术;皮肤和皮下组织切开引流术;皮肤和皮下组织血肿抽吸术;踝关节骨折切开复位术;韧带修补术
143	D10(创伤2)	2021-10-22	2021-10-31	3156607	吴小月	女	58Y	髌骨骨折	2型糖尿病;脂肪肝;胆囊结石;肾结石;下肢特指深部脉管静脉炎和血栓性静脉炎	好转	黄俊武	王鉴顺	王鉴顺	髌骨骨折切开复位术
144	D10(创伤2)	2021-10-25	2021-11-09	3159987	闫梅英	女	59Y	股骨粗隆间骨折	下肢静脉血栓形成;脂肪肝;胸腔积液;肺部感染	治愈	陈华	孙辽军	王特	股骨骨折闭合复位术
145	D10(创伤2)	2021-10-31	2021-11-10	3160215	王秀凤	女	84Y	股骨颈骨折	下肢动脉粥样硬化;下肢静脉血栓形成;主动脉钙化;肾结石;肺钙化	治愈	陈华	孙辽军	王特	股骨骨折闭合复位术
146	D10(创伤2)	2021-11-10	2021-11-20	3163723	郑炳候	男	62Y	开放性髌骨骨折	下肢静脉血栓形成;脂肪肝;肝囊肿;肾结石;后天性肾囊肿	好转	陈华	孙辽军	王特	皮肤和皮下组织血肿抽吸术;髌骨骨折切开复位术
147	D10(创伤2)	2021-10-28	2021-11-28	3166560	朱彩弟	女	86Y	股骨粗隆间骨折	高血压病;具有心脏起搏器;泌尿道感染;下肢特指深部脉管静脉炎和血栓性静脉炎;下肢静脉血栓形成;慢性肾脏病5期;胆总管结石;肾结石;后天性肾囊肿	治愈	陈华	孙辽军	王特	下腔静脉滤器置入术;股骨骨折切开复位术;股静脉穿刺术
148	D10(创伤2)	2021-11-17	2021-11-30	3167311	刘联兰	女	55Y	胫骨骨折	髋臼骨折;肋骨骨折;头皮血肿;下肢静脉血栓形成;特指手术后状态;脂肪肝;肱骨内髁骨折	治愈	陈华	孙辽军	王特	胫骨骨折切开复位术
149	D10(创伤2)	2021-11-17	2021-12-01	3167664	余花妹	女	80Y	股骨粗隆间骨折	下肢静脉血栓形成;心包积液;肺部感染;肋骨骨折;下肢动脉粥样硬化;腔隙性脑梗死;后天性肾囊肿;2型糖尿病;高血压病;心功能不全;陈旧性肋骨骨折	好转	陈华	孙辽军	卢迪
150	D10(创伤2)	2021-11-30	2021-12-08	3170130	南莉琪	女	44Y	股骨髁骨折	腓骨骨折;创伤性股动脉血栓形成;胆道感染;胆囊结石;脂肪肝	治愈	黄俊武	王鉴顺	王鉴顺	股骨骨折切开复位术
151	D10(创伤2)	2021-12-06	2021-12-18	3173064	王碎玉	女	72Y	股骨颈骨折	高血压病;肋骨骨折;下肢动脉粥样硬化;脂肪肝;下肢静脉血栓形成	治愈	陈华	孙辽军	卢迪	全髋关节置换术
152	D10(创伤2)	2021-12-13	2021-12-20	3174162	邹春雷	女	78Y	股骨粗隆间骨折	腰椎退行性病变;2型糖尿病;高血压病;腔隙性脑梗死;胆囊结石;创伤性肾血肿;下肢静脉炎和血栓性静脉炎;脂肪肝;下肢静脉曲张	好转	黄俊武	黄俊武	黄俊武	股骨骨折闭合复位术
153	D10(创伤2)	2021-12-11	2021-12-21	3174505	项晓武	男	45Y	股骨干骨折	下肢特指深部脉管静脉炎和血栓性静脉炎;脂肪肝	治愈	陈华	孙辽军	卢迪	下肢静脉造影;股骨骨折切开复位术;下腔静脉滤器置入术
154	D10(创伤2)	2021-12-10	2021-12-23	3175178	周永茶	女	79Y	股骨颈骨折	肝囊肿;下肢动脉粥样硬化;下肢静脉血栓形成;脱髓鞘病;脑缺血灶;高血压病;脑积水	好转	石成弟	石成弟	张儒	下肢静脉滤器置入术;股静脉穿刺术
155	D10(创伤2)	2021-12-09	2021-12-28	3176818	潘孝生	男	69Y	闭合性胫骨平台骨折	下肢静脉血栓形成;高血压病;冯·维勒布兰德病;前列腺增生;脂肪肝;前列腺结石;后天性肾囊肿	治愈	陈华	孙辽军	卢迪	胫骨骨折切开复位术
156	D11(创伤3)	2020-12-23	2021-01-04	3055182	胡秀月	女	76Y	股骨颈骨折	后天性肾囊肿;下肢动脉粥样硬化;下肢静脉血栓形成	治愈	余可和	余可和	应晓洲	股骨骨折切开复位螺钉内固定术
157	D11(创伤3)	2020-12-27	2021-01-06	3055829	王路松	男	78Y	股骨干骨折	脑血管病后遗症;下肢动脉粥样硬化;多发性脑梗死;取除骨折内固定装置;下肢静脉血栓形成	治愈	余可和	余可和	应晓洲	股骨骨折闭合复位螺钉内固定术;股骨内固定物取出术
158	D11(创伤3)	2020-12-29	2021-01-15	3058897	李英	女	60Y	股骨颈骨折	胸腔积液;下肢动脉粥样硬化;后天性肾囊肿;肾结石;慢性胃炎;下肢静脉血栓形成	治愈	余可和	余可和	应晓洲	股骨骨折闭合复位术
159	D11(创伤3)	2021-01-18	2021-02-08	3066122	姚定新	男	53Y	股骨骨折	坐骨神经损害;胫骨骨折;肋骨骨折;下肢静脉血栓形成	治愈	余可和	余可和	应晓洲	皮肤和皮下组织血肿抽吸术;大腿离断术
160	D11(创伤3)	2021-01-22	2021-02-09	3066629	何祖松	男	64Y	骨盆骨折	下肢静脉血栓形成;髋和大腿水平坐骨神经损伤;腓骨骨折;耻骨骨折;髋臼骨折;髂骨骨折;腰椎骨折	治愈	洪建军	余洋	余洋	骨盆骨折切开复位钢板内固定术
161	D11(创伤3)	2021-02-10	2021-02-27	3072496	王忠勤	男	80Y	股骨特指部位骨折	动脉粥样硬化;面部软组织挫伤;2型糖尿病;创伤性蛛网膜下腔出血;脑挫伤;眶骨骨折;下肢静脉血栓形成	治愈	洪建军	余洋	余洋	股骨骨折切开复位术
162	D11(创伤3)	2021-02-02	2021-03-01	3073616	柯朝金	男	70Y	胫腓骨下端骨折	陈旧性肋骨骨折;腓骨骨折;慢性筛窦炎;脑挫伤;距骨骨折;股骨骨折;颈椎退行性病变;下肢特指深部脉管静脉炎和血栓性静脉炎;老年性脑萎缩;开放性多发性损伤;多发性骨折;颧骨骨折	治愈	潘骏	潘骏	金海东	腓骨骨折切开复位术;踝关节骨折切开复位术
163	D11(创伤3)	2021-03-11	2021-03-20	3079917	邹岳明	男	97Y	股骨粗隆间骨折	高血压病;下肢动脉粥样硬化;下肢静脉血栓形成;胆囊结石;后天性肾囊肿;完全性右束支传导阻滞;房性早搏	治愈	潘骏	潘骏	金海东	肱骨骨折切开复位术
164	D11(创伤3)	2021-03-13	2021-03-24	3081034	卢冬菊	女	73Y	股骨颈骨折	2型糖尿病;静脉栓塞和血栓形成	治愈	王振文	王振文	蔡乐益	全髋关节置换术
165	D11(创伤3)	2021-03-25	2021-03-27	3082302	金玉菊	女	81Y	股骨颈骨折	下肢动脉粥样硬化;多发性肝囊肿;下肢深静脉血栓形成;后天性肾囊肿	未愈	潘骏	潘骏	金海东
166	D11(创伤3)	2021-03-22	2021-04-11	3086875	尤良元	男	90Y	股骨粗隆间骨折	下肢动脉粥样硬化;下肢动脉血栓形成;慢性阻塞性肺病;脑卒中后遗症;高血压病	治愈	余可和	余可和	卢晓郎	股骨骨折闭合复位髓内针内固定术
167	D11(创伤3)	2021-04-13	2021-04-21	3090379	陈尽燕	女	47Y	耻骨骨折	多发性肋骨骨折;下肢静脉血栓形成;特指手术后状态	治愈	洪建军	余洋	余洋	骨盆骨折切开复位钢板内固定术
168	D11(创伤3)	2021-03-17	2021-04-22	3090897	董地眉	女	45Y	下肢深静脉血栓形成	骨折治疗后恢复期;下肢肌腱损伤;皮肤窦道	治愈	洪建军	余洋	余洋
169	D11(创伤3)	2021-04-21	2021-05-03	3094344	瞿宏妹	女	82Y	股骨粗隆间骨折	慢性支气管炎;下肢静脉血栓形成	治愈	洪建军	周一飞	周一飞	股骨骨折闭合复位髓内针内固定术
170	D11(创伤3)	2021-04-25	2021-05-04	3094802	陈林华	男	54Y	股骨颈骨折	下肢静脉血栓形成	治愈	余可和	余可和	卢晓郎	股骨骨折闭合复位螺钉内固定术
171	D11(创伤3)	2021-05-08	2021-05-15	3098427	林玉珠	女	62Y	髌骨骨折	高血压病;下腔静脉血栓形成;脂肪肝	治愈	潘骏	冯永增	金海东	髌骨骨折切开复位张力带钢丝内固定术
172	D11(创伤3)	2021-05-25	2021-06-05	3105342	朱招弟	女	86Y	股骨颈骨折	特指手术后状态;胆囊息肉;脂肪肝;胆囊结石;下肢动脉粥样硬化;下肢静脉血栓形成;肝囊肿;肺部感染	治愈	王振文	水小龙	水小龙	人工股骨头置换术
173	D11(创伤3)	2021-05-31	2021-06-05	3105402	方圣光	男	61Y	股骨粗隆间骨折	高血压病;贫血;下肢静脉血栓形成;肺部感染	治愈	洪建军	周一飞	郑亦静	股骨骨折闭合复位髓内针内固定术
174	D11(创伤3)	2021-05-23	2021-06-06	3105975	徐春桃	女	81Y	股骨颈骨折	下肢动脉粥样硬化;下肢静脉血栓形成	治愈	余可和	余可和	卢晓郎	全髋关节置换术
175	D11(创伤3)	2021-06-05	2021-06-16	3109080	李巧妹	女	69Y	股骨颈骨折	高血压病;主动脉瓣关闭不全;下肢动脉粥样硬化;下肢静脉血栓形成;心功能不全	治愈	王振文	水小龙	水小龙	全髋关节置换术
176	D11(创伤3)	2021-06-04	2021-06-17	3109562	陈先佐	男	59Y	跟骨骨折	膝关节十字韧带扭伤;闭合性胫骨平台骨折;下肢浅表脉管静脉炎和血栓静脉炎	治愈	潘骏	冯永增	金海东	胫骨骨折切开复位钢板内固定术;跟骨骨折切开复位钢板内固定术;膝关节镜下后交叉韧带止点撕脱骨折固定术
177	D11(创伤3)	2021-06-01	2021-06-19	3109884	朱珠娥	女	59Y	胫骨骨折累及踝关节	下肢深静脉血栓形成;脂肪肝	治愈	余可和	余可和	卢晓郎	下腔静脉滤器置入术;股静脉穿刺术;下肢静脉造影;踝关节骨折切开复位钢板内固定术;胫骨骨折切开复位钢板内固定术
178	D11(创伤3)	2021-06-13	2021-06-26	3112350	张永珍	男	57Y	跖骨骨折	跟骨骨折;距骨骨折;下肢浅表脉管静脉炎和血栓静脉炎;骰骨骨折;2型糖尿病;脂肪肝;足舟状骨骨折	治愈	余可和	余可和	卢晓郎	跗跖关节脱位切开复位术;跗骨骨折切开复位螺钉内固定术;跖骨骨折切开复位钢板内固定术
179	D11(创伤3)	2021-07-05	2021-07-16	3119560	朱凤根	男	73Y	股骨粗隆间骨折	肺结节;肺部感染;胸腔积液;主动脉瓣钙化;肝下垂;高血压病;主动脉钙化;下肢动脉粥样硬化;股静脉血栓性静脉炎;下肢深静脉血栓形成;肺气肿	治愈	潘骏	冯永增	冯永增	下肢静脉滤器置入术;股静脉穿刺术;下肢静脉造影;股骨骨折闭合复位髓内针内固定术
180	D11(创伤3)	2021-07-26	2021-08-02	3125652	王薇薇	女	59Y	髌骨骨折	胆囊结石;特指器官后天性缺失;下肢静脉血栓形成;后天性肾囊肿;肝钙化灶;肝囊肿	治愈	余可和	余可和	卢晓郎	髌骨骨折切开复位张力带钢丝内固定术
181	D11(创伤3)	2021-07-19	2021-08-07	3127346	芦冬莲	女	66Y	股骨干骨折	肘关节骨折;多发性肋骨骨折;头部外伤;下肢深静脉血栓形成;多发性脑梗死;硬脑膜下积液;股骨颈骨折	治愈	王振文	王振文	水小龙	股静脉穿刺术;下腔静脉滤器置入术;股骨骨折切开复位钢板内固定术;股骨骨折闭合复位螺钉内固定术
182	D11(创伤3)	2021-07-29	2021-08-09	3128381	郑正庄	男	61Y	股骨颈骨折	痛风;下肢静脉血栓形成;酒精性肝病	治愈	孔建中	孔建中	陈墨川	下腔静脉滤器置入术;全髋关节置换术;下肢静脉造影;髋关节滑膜切除术;股静脉穿刺术
183	D11(创伤3)	2021-08-18	2021-09-04	3137483	徐登良	男	54Y	胫腓骨干骨折	下肢静脉血栓形成;陈旧性腰椎骨折;肺结节;胸腔积液;高血压病;脂肪肝	治愈	潘骏	冯永增	何自力	股静脉穿刺术;下腔静脉滤器置入术;胫骨骨折闭合复位螺钉内固定术;下肢静脉造影
184	D11(创伤3)	2021-08-30	2021-09-06	3138349	康金山	男	72Y	双踝骨折	足舟状骨骨折;膝挫伤;特指手术后状态;下肢动脉粥样硬化;下肢静脉血栓形成;前列腺增生;前列腺结石	治愈	潘骏	潘骏	何自力	踝关节骨折切开复位螺钉内固定术
185	D11(创伤3)	2021-09-06	2021-09-19	3142486	夏克勇	男	43Y	股骨干骨折	跖骨骨折;慢性肝炎;下肢静脉血栓形成;胆囊息肉;前列腺结石;肋骨骨折;肺结节	治愈	潘骏	潘骏	何自力	跖骨骨折切开复位螺钉内固定术;股骨骨折闭合复位髓内针内固定术
186	D11(创伤3)	2021-10-16	2021-10-21	3153208	陈钦条	男	55Y	取除骨折内固定装置	脂肪肝;下肢深静脉血栓形成	其他	洪建军	余洋	余洋	髌骨内固定物取出术
187	D11(创伤3)	2021-10-20	2021-11-01	3157004	郑银花	女	77Y	股骨颈骨折	下肢深静脉血栓形成;下肢动脉粥样硬化;脂肪肝;2型糖尿病;高血压病	治愈	王振文	水小龙	卢迪	人工股骨头置换术
188	D11(创伤3)	2021-11-13	2021-11-21	3164057	陈德上	男	48Y	跟骨骨折	下肢静脉血栓形成;胆囊息肉;前列腺增生;前列腺结石;肝和胆道影像检查异常	治愈	潘骏	冯永增	冯永增	跟骨骨折切开复位钢板内固定术
189	D11(创伤3)	2021-11-21	2021-11-28	3166417	吴秀英	女	58Y	三踝骨折	高血压病;下肢静脉血栓形成;踝关节半脱位	治愈	潘骏	冯永增	冯永增	踝关节脱位切开复位术;踝关节骨折切开复位钢板内固定术
190	D11(创伤3)	2021-11-18	2021-12-03	3168101	黄直夫	男	68Y	肱骨上端骨折	后天性肾囊肿;多发性肋骨骨折;肩胛骨骨折;锁骨骨折;下肢静脉血栓形成;肺挫伤;头皮血肿;头皮挫伤;高血压病;肝囊肿	治愈	王振文	水小龙	何自力	锁骨骨折切开复位钢板内固定术;肱骨骨折切开复位髓内针内固定术
191	D11(创伤3)	2021-11-08	2021-12-04	3168666	林永树	男	64Y	骨盆骨折	脂肪肝;创伤性皮下气肿;髂骨骨折;骶骨骨折;耻骨骨折;肺挫伤;下肢静脉血栓形成;腰椎骨折;失血性休克;肱骨髁间骨折;气胸;多发性肋骨骨折;下肢动脉粥样硬化	治愈	余可和	余可和	何自力	骨盆骨折切开复位钢板内固定术;皮肤和皮下组织血肿抽吸术;肱骨开放性骨折清创术;肱骨骨折切开复位钢板内固定术;下肢动脉造影
192	D11(创伤3)	2021-12-09	2021-12-23	3175237	卢金山	男	75Y	开放性内踝骨折	踝关节脱位;心房颤动;小腿水平胫神经损伤;小腿水平特指血管损伤;肺部感染;脂肪肝;后天性肾囊肿;下肢皮肤套脱伤;下肢静脉血栓形成;高血压病;脑梗死后遗症	治愈	余可和	余可和	卢晓郎	踝关节脱位切开复位术;踝关节骨折切开复位螺钉内固定术
193	D12(手外)	2021-03-06	2021-04-10	3086506	冉洪林	男	59Y	足部皮肤撕裂伤	原发性双侧膝关节病;踝和足水平神经损伤;踝和足水平血管损伤;踝和足水平肌肉和肌腱损伤;特指急性骨髓炎;腓骨骨折;下肢深静脉血栓形成	好转	李志杰	褚庭纲	朱旭伟	创面负压封闭引流[VSD];皮肤和皮下坏死组织切除清创术;皮肤缝合术;带蒂皮瓣移植术;经胫骨和腓骨的小腿离断术
194	D12(手外)	2021-04-17	2021-04-26	3092122	徐碎花	女	83Y	股骨颈骨折	下肢浅表脉管静脉炎和血栓静脉炎;下肢动脉粥样硬化	治愈	陈华	孙辽军	孙辽军	人工股骨头置换术
195	D12(手外)	2021-06-12	2021-07-03	3114780	杨正祥	男	64Y	创伤后伤口感染	肺挫伤;后天性肾囊肿;面骨骨折;下颌骨骨折;下肢静脉血栓形成;下肢开放性伤口;开放性多发性损伤;颅腔积气	好转	李志杰	李志杰	朱旭伟	皮肤和皮下坏死组织切除清创术;创面负压封闭引流[VSD];带蒂皮瓣移植术
196	D12(手外)	2021-09-02	2021-09-09	3139390	吴彩英	女	70Y	桡骨下端骨折	下肢动脉粥样硬化;后天性肾囊肿;下肢静脉血栓形成	治愈	陈华	孙辽军	王特	桡骨骨折切开复位钢板内固定术
197	D12(手外)	2021-09-07	2021-09-12	3140320	林彩云	女	55Y	跖骨骨折	高血压病;肺钙化;多发性肋骨骨折;静脉栓塞和血栓形成	治愈	陈华	孙辽军	王特	跖骨骨折切开复位钢板内固定术
198	D13(手外)	2021-05-26	2021-06-02	3104779	陈满兰	女	80Y	桡骨下端骨折	恶性肿瘤手术后随诊检查;特指手术后状态;心功能不全;下肢静脉血栓形成;二尖瓣及主动脉瓣关闭不全;下肢动脉粥样硬化	治愈	陈星隆	吴志鹏	吴志鹏	桡骨骨折切开复位钢板内固定术
199	D13(手外)	2021-06-26	2021-07-06	3115986	郑碧琴	女	81Y	肱骨上端骨折	下肢静脉血栓形成;特指手术后状态;桡骨下端骨折	治愈	洪建军	周一飞	郑亦静	下腔静脉滤器置入术;肱骨骨折切开复位螺钉内固定术;股静脉穿刺术
200	D13(手外)	2021-10-27	2021-11-06	3157361	麻德林	男	76Y	内踝骨折	脂肪肝;肾结石;后天性肾囊肿;前列腺增生;下肢动脉粥样硬化;下肢静脉血栓形成;前列腺结石;距骨骨折;高血压病	治愈	洪建军	余洋	余洋	距骨骨折闭合复位术;踝关节镜检查;踝关节骨折切开复位螺钉内固定术
201	D14(脊柱)	2021-02-03	2021-02-11	3067383	朱珠芳	女	85Y	腰椎骨折	高血压病;陈旧性腰椎骨折;后天性肾囊肿;骨质疏松;下肢静脉血栓形成	治愈	倪文飞	倪文飞	吴爱悯	腰椎骨折球囊扩张成形术
202	D14(脊柱)	2021-02-15	2021-02-22	3071129	陈金兰	女	79Y	腰椎骨折	下肢动脉粥样硬化;帕金森病;骨质疏松;下肢静脉血栓形成	治愈	徐晖	徐晖	覃燕青	腰椎骨折球囊扩张成形术
203	D14(脊柱)	2021-02-14	2021-02-24	3072031	陈素贞	女	73Y	腰椎骨折	下肢动脉粥样硬化;后天性肾囊肿;骨质疏松;泌尿道感染;脂肪肝;慢性支气管炎;下肢静脉血栓形成	好转	徐晖	徐晖	覃燕青	腰椎骨折球囊扩张成形术
204	D14(脊柱)	2021-03-08	2021-03-24	3081120	薛尧妹	女	85Y	多发性腰椎骨折	骨质疏松;高血压病;下肢静脉血栓形成;下肢动脉粥样硬化;心室壁瘤;胆囊结石	治愈	倪文飞	倪文飞	窦海成	腰椎骨折球囊扩张成形术
205	D14(脊柱)	2021-04-04	2021-04-14	3087988	郭翠英	女	84Y	胸椎骨折	下肢静脉血栓形成;泌尿道感染;腔隙性脑梗死;糖尿病;骨质疏松;高血压病;陈旧性桡骨骨折	治愈	徐晖	徐晖	李振兴	胸椎骨折球囊扩张成形术
206	D14(脊柱)	2021-04-13	2021-04-24	3091592	陈继雪	男	83Y	多发性胸椎骨折	陈旧性腰椎骨折;骨质疏松;胸椎退行性病变;下肢静脉血栓形成;腰椎椎管狭窄;痴呆;腔隙性脑梗死;腰椎退行性病变	好转	徐晖	王胜	王胜	胸椎骨折球囊扩张成形术
207	D14(脊柱)	2021-08-01	2021-08-10	3128621	郑兰妹	女	60Y	髌骨骨折	后天性肾囊肿;下肢静脉血栓形成	治愈	孔建中	孔建中	陈墨川	关节软骨修复术;股四头肌缝合术;髌骨骨折切开复位螺钉内固定术
208	D14(脊柱)	2021-07-20	2021-08-15	3130553	林亨顺	男	67Y	多发性胸椎骨折	下肢静脉血栓形成;胸椎椎管狭窄;多发性肋骨骨折;肺挫伤;肺部感染;创伤性血气胸;创伤性胸腔积液;皮肤挫伤;急性支气管炎;后天性肾囊肿;前列腺增生	治愈	徐晖	王胜	217008	椎弓根钉内固定术;脊椎骨折复位术;胸椎病损切除术;胸椎椎板切除减压术
209	D14(脊柱)	2021-08-28	2021-08-31	3136263	杜红景	女	76Y	脊椎前移	下肢动脉血栓形成;高血压病;冠状动脉支架植入后状态;特指手术后状态;陈旧性腰椎骨折	好转	黄其杉	黄其杉	许聪
210	D14(脊柱)	2021-08-29	2021-09-01	3136651	曾春香	女	85Y	股骨粗隆间骨折	心脏病;下肢静脉血栓形成;下肢动脉粥样硬化;脂肪肝;甲状腺机能亢进症;高血压病;肾钙化;后天性肾囊肿	未愈	陈龙	陈龙	陈龙
211	D14(脊柱)	2021-08-21	2021-09-11	3139743	陈小玲	女	67Y	多发性腰椎骨折	创伤性胸腔积液;多发性肋骨骨折;胸椎骨折;下肢静脉血栓形成;主动脉钙化;肾结石	治愈	倪文飞	吴爱悯	吴爱悯	腰椎骨折球囊扩张成形术;胸椎骨折球囊扩张成形术
212	D14(脊柱)	2021-07-24	2021-10-12	3149999	郑美娇	女	73Y	化脓性脊柱炎	高血压病;骨质疏松;脂肪肝;下肢静脉血栓形成;腰椎骨折;腰椎间盘突出	好转	黄其杉	武垚森	武垚森	椎弓根钉内固定术;后入路腰椎间盘切除术;腰椎椎板切除减压术
213	D14(脊柱)	2021-09-18	2021-11-08	3159531	高彩英	女	49Y	多发性胸椎骨折	胸部特指部位脱位;肺挫伤;创伤性胸腔积液;创伤性血气胸;头皮血肿;室性早搏;下肢静脉血栓形成;特指手术后状态;胸椎脱位;腰椎骨折	好转	黄其杉	武垚森	武垚森	脊椎骨折复位术;椎弓根钉内固定术;后入路胸椎融合术;胸椎间盘切除伴椎板切除术
214	D14(脊柱)	2021-11-28	2021-12-13	3171639	江永根	男	48Y	腰椎骨折	腰骶神经根损伤;下肢静脉血栓形成;高血压病;后天性肾囊肿;肾结石	治愈	徐晖	徐晖	朱思品	椎弓根钉内固定术;后入路腰椎融合术;腰椎植骨术;脊椎骨折复位术
215	D14(脊柱)	2021-12-19	2021-12-27	3176407	王玉连	女	78Y	腰椎骨折	胸椎骨折;尿潴留;消化道出血;骨质疏松;下肢静脉血栓形成;下肢动脉粥样硬化	治愈	黄其杉	黄其杉	林仲可	胸椎骨折球囊扩张成形术;腰椎骨折球囊扩张成形术
216	D14(脊柱)	2021-12-05	2021-12-28	3176738	杨崇勉	男	64Y	颈部脊髓损伤	老年性脑萎缩;胆囊炎;后天性肾囊肿;泌尿道感染;颈椎椎管狭窄;脑挫伤;头皮裂伤;颅骨骨折;肺挫伤;创伤性胸腔积液;腹水;皮肤挫伤;创伤性牙齿脱落;下肢动脉粥样硬化;下肢静脉血栓形成	好转	徐晖	徐晖	朱思品	前入路颈椎融合术;前入路颈椎间盘切除术
217	D15颈椎外科、腰椎外科	2020-12-23	2021-01-03	3054906	谢宝花	女	76Y	胸椎骨折	陈旧性腰椎骨折;脑梗死后遗症;高血压病;老年性脑萎缩;陈旧性胸椎骨折;骨质疏松;慢性支气管炎;下肢静脉血栓形成;脱髓鞘性脑病;特指手术后状态	治愈	毛方敏	毛方敏	毛方敏	胸椎骨折球囊扩张成形术;股静脉穿刺术;下腔静脉滤器置入术
218	D15颈椎外科、腰椎外科	2021-01-21	2021-01-25	3062867	周宪	男	61Y	颈部脊髓损伤	椎体塌陷;第二颈椎骨折;肺结节;头皮血肿;下肢静脉血栓形成;肋骨骨折;肺大泡;肺气肿;尺骨上端骨折	好转	林焱	武垚森	武垚森
219	D15颈椎外科、腰椎外科	2021-02-09	2021-02-15	3068544	卢柳钗	女	85Y	腰椎骨折	下肢动脉硬化闭塞症;下肢动脉粥样硬化;高血压病;胸椎骨折;骨质疏松;肺部感染;下肢静脉血栓形成;下肢动脉狭窄	好转	林焱	武垚森	武垚森
220	D15颈椎外科、腰椎外科	2021-02-14	2021-02-20	3070215	孔玉茶	女	76Y	腰椎骨折	下肢动脉粥样硬化;陈旧性胸椎骨折;骨质疏松;下肢静脉血栓形成	治愈	王向阳	王向阳	盛孙仁	腰椎骨折球囊扩张成形术
221	D15颈椎外科、腰椎外科	2021-02-12	2021-02-27	3072864	汤春梅	女	62Y	胸椎骨折	腰椎椎管狭窄;急性冠脉综合征;急性非ST段抬高型心肌梗塞;多发性肋骨骨折;肺挫伤;腰椎骨折;下肢静脉血栓形成;癫痫	治愈	毛方敏	毛方敏	许聪	胸椎骨折球囊扩张成形术;椎弓根钉内固定术
222	D15颈椎外科、腰椎外科	2021-03-20	2021-04-06	3085261	王双进	男	56Y	颈部脊髓损伤	下肢动脉粥样硬化;乙型病毒性肝炎;颈椎关节强硬;腰椎骨折;锁骨骨折;肩胛骨骨折;下颌骨骨折;肺挫伤;胸腔积液;尺骨骨折;肋骨骨折;下肢静脉血栓形成	好转	毛方敏	毛方敏	毛方敏	前入路颈椎融合术;颈椎植骨术;颈椎前路椎管减压术
223	D15颈椎外科、腰椎外科	2021-03-20	2021-04-10	3086497	曾新恩	男	63Y	腰椎骨折	抑郁状态;梅毒;下肢静脉血栓形成;单纯性肾囊肿;肺部感染	治愈	王向阳	王向阳	许聪	椎弓根钉内固定术
224	D15颈椎外科、腰椎外科	2021-04-19	2021-05-04	3094748	郑福郎	男	60Y	胸椎骨折	胸椎脱位;下肢静脉血栓形成;肺挫伤;头皮血肿;多处挫伤;脂肪肝;脊髓损伤;腰椎骨折;多发性肋骨骨折;气胸;胸腔积液;糖尿病;高血压病;冠状动脉支架植入后状态	治愈	毛方敏	毛方敏	毛方敏	后入路腰椎融合术;椎管减压术;椎弓根钉内固定术;股静脉穿刺术;下肢静脉滤器置入术
225	D15颈椎外科、腰椎外科	2021-05-01	2021-05-16	3098774	张芬德	女	55Y	胸椎骨折	脊髓损伤;胸椎脱位;肋骨骨折;胸腔积液;下肢静脉血栓形成;可疑疾病观察	好转	毛方敏	毛方敏	毛方敏	椎管减压术;后入路胸椎融合术;椎弓根钉内固定术
226	D15颈椎外科、腰椎外科	2021-05-16	2021-06-07	3106107	张芬德	女	55Y	脊髓损伤	特指手术后状态;胸腔积液;肋骨骨折;下肢静脉血栓形成	好转	毛方敏	毛方敏	窦海成
227	D15颈椎外科、腰椎外科	2021-06-07	2021-06-15	3108732	陈和中	男	86Y	骨质疏松伴病理性骨折	胸椎骨折;膀胱恶性肿瘤;下肢静脉血栓形成;高血压病;糖尿病;特指心律失常;前列腺增生;腰椎骨折;肺恶性肿瘤;特指手术后状态	好转	王向阳	王向阳	林仲可	股静脉穿刺术;下腔静脉滤器置入术
228	D15颈椎外科、腰椎外科	2021-06-26	2021-07-03	3114849	潘教品	男	71Y	腰椎骨折	骨质疏松;脊柱肿瘤;胸腔积液;肋骨骨折;后天性肾囊肿;慢性支气管炎;前列腺结石;下肢静脉血栓形成;下肢动脉粥样硬化;腰椎椎管狭窄;肾结石	好转	毛方敏	毛方敏	窦海成
229	D15颈椎外科、腰椎外科	2021-06-28	2021-07-06	3115951	戴家烧	男	76Y	腰椎骨折	下肢动脉粥样硬化;下肢静脉血栓形成;高血压病;骨质疏松;先天性静脉扩张	治愈	林焱	武垚森	武垚森	腰椎骨折球囊扩张成形术
230	D15颈椎外科、腰椎外科	2021-06-27	2021-07-06	3115970	王贤妹	女	55Y	胸椎骨折	骨质疏松;高血压病;下肢静脉血栓形成;多发性肝囊肿;脂肪肝;原发性甲状腺机能亢进症	好转	王向阳	林仲可	林仲可	胸椎骨折球囊扩张成形术
231	D15颈椎外科、腰椎外科	2021-06-30	2021-07-08	3116819	郑秋桃	女	84Y	腰椎骨折	骨质疏松;高血压病;下肢动脉粥样硬化;心功能不全;后天性肾囊肿;下肢静脉血栓形成;主动脉瓣疾患;胆囊结石	治愈	毛方敏	毛方敏	窦海成	腰椎骨折球囊扩张成形术
232	D15颈椎外科、腰椎外科	2021-06-15	2021-07-10	3117257	魏翠妹	女	76Y	腰椎骨折	头皮血肿;多发性肋骨骨折;胸腔积液;多发性脑梗死;肺萎陷;脊椎前移;下肢动脉粥样硬化;腰椎椎管狭窄;下肢静脉血栓形成;头部外伤;腰椎间盘突出;胆总管结石;胆囊结石	治愈	毛方敏	毛方敏	窦海成	椎弓根钉内固定术
233	D15颈椎外科、腰椎外科	2021-07-04	2021-07-12	3118096	余桂花	女	67Y	腰椎骨折	高血压病;2型糖尿病;肾结石;躯干皮肤和皮下组织良性脂肪瘤样肿瘤;下肢静脉血栓形成;骨质疏松;腰椎间盘突出;脂肪肝	治愈	毛方敏	毛方敏	窦海成	腰椎骨折球囊扩张成形术
234	D15颈椎外科、腰椎外科	2021-07-20	2021-07-31	3124982	陈锡炲	男	82Y	胸椎骨折	腰椎骨折;静脉栓塞和血栓形成;2型糖尿病;高血压病;骨质疏松;腰椎间盘突出;头部外伤;胸腔积液	治愈	毛方敏	毛方敏	窦海成	胸椎骨折球囊扩张成形术;腰椎骨折球囊扩张成形术
235	D15颈椎外科、腰椎外科	2021-07-19	2021-08-01	3125361	饶安	男	53Y	颈部脊髓损伤	后天性肾囊肿;前列腺结石;创伤性脑血肿;颈椎椎管狭窄;腰椎骨折;颈椎退行性病变;特指手术后状态;下肢静脉血栓形成;脂肪肝	好转	王向阳	王向阳	林仲可	颈椎前路椎管减压术;椎管成形术;颈椎植骨术
236	D15颈椎外科、腰椎外科	2021-08-31	2021-09-08	3139047	董文曼	女	70Y	腰椎骨折	陈旧性胸椎骨折;骨质疏松;帕金森综合征;脑卒中后遗症;高血压病;2型糖尿病;肾结石;后天性肾囊肿;下肢静脉血栓形成	治愈	毛方敏	林仲可	林仲可	腰椎骨折球囊扩张成形术
237	D15颈椎外科、腰椎外科	2021-09-11	2021-09-15	3141240	黄永春	女	87Y	腰椎骨折	骨质疏松;下肢动脉粥样硬化;下肢静脉血栓形成;肝回声不均;特指手术后状态;腰椎间盘突出;腰椎退行性病变	治愈	王向阳	王向阳	窦海成	腰椎骨折球囊扩张成形术
238	D15颈椎外科、腰椎外科	2021-09-29	2021-10-12	3149880	宋新娒	男	77Y	骨质疏松伴病理性骨折	Ⅱ度二型房室传导阻滞;原发性单侧膝关节病;下肢静脉血栓形成;胸椎骨折;间质性肺病;高血压病;下肢动脉粥样硬化;膝关节十字韧带扭伤;膝关节积液;脂肪肝;胆囊息肉;前列腺增生;前列腺结石;糖尿病	好转	林焱	盛孙仁	陈教想	胸椎骨折球囊扩张成形术
239	D15颈椎外科、腰椎外科	2021-10-11	2021-10-18	3151964	沈银莲	女	88Y	腰椎骨折	高血压病;下肢静脉血栓形成;肝回声不均;后天性肾囊肿;肾结石;下肢动脉粥样硬化;骨质疏松	治愈	毛方敏	毛方敏	林仲可	腰椎骨折球囊扩张成形术
240	D15颈椎外科、腰椎外科	2021-11-14	2021-11-23	3164684	夏鸿眉	女	77Y	胸椎骨折	胆囊结石;下肢动脉粥样硬化;下肢静脉血栓形成;高血压病;脂肪肝	治愈	毛方敏	林仲可	林仲可	胸椎骨折球囊扩张成形术
241	D15颈椎外科、腰椎外科	2021-12-08	2021-12-18	3173040	陈余挺	男	49Y	腰椎骨折	不完全截瘫;下肢静脉血栓形成	好转	王向阳	王向阳	许聪	椎弓根钉内固定术;脊椎骨折复位术;腰椎植骨术;腰椎椎板切除减压术
242	D15颈椎外科、腰椎外科	2021-12-22	2021-12-30	3177542	王最金	女	79Y	腰椎骨折	高血压病;下肢静脉血栓形成;下肢动脉粥样硬化;胆囊结石;后天性肾囊肿;肾衰竭	治愈	王向阳	王向阳	许聪	腰椎骨折球囊扩张成形术
243	D21ICU	2021-05-17	2021-06-26	3112671	仇深达	男	52Y	大肠杆菌败血症	2型糖尿病;下肢深静脉血栓形成;多发性肋骨骨折;肺栓塞;感染性休克;肺部感染;腹壁挫伤;肾衰竭;泌尿道感染;肺挫伤;创伤性胸腔积液;创伤性气胸;呼吸衰竭	未愈	林孟相	魏大臻	魏大臻	肋骨骨折切开复位螺钉内固定术
244	D21ICU	2021-07-10	2021-08-01	3125558	程依桃	男	55Y	肾挫伤	髂骨骨折;肺部感染;肺特指损伤;肱骨骨折;多发性肋骨骨折;肺不张;创伤性胸腔积液;多处挫伤;肝功能不全;肾周积液;多发性腰椎骨折;下肢深静脉血栓形成	好转	林孟相	陈建时	陈建时	肱骨骨折切开复位钢板内固定术;肾动脉栓塞术
245	F02急诊创伤	2020-12-12	2021-02-04	3065048	徐时安	男	69Y	创伤性蛛网膜下腔出血	眶骨骨折;颧骨骨折;下颌骨骨折;颅底骨折;下肢静脉血栓形成;下肢动脉粥样硬化;特指趾骨骨折;肾包膜下积液;肩锁关节脱位;多处挫伤;脑挫伤;股骨骨折;肋骨骨折	好转	林露阳	林露阳	陈健2	股骨骨折切开复位髓内针内固定术;颧骨骨折切开复位内固定术;髁突骨折切开复位内固定术;肩锁关节脱位切开复位内固定术;上肢韧带缝合术
246	F02急诊创伤	2021-04-30	2021-05-21	3100513	徐月秋	男	59Y	腰椎骨折	肱骨外髁骨折;胸椎退行性病变;肱骨髁上骨折;鹰嘴骨折;桡骨头骨折;肩锁关节脱位;肋骨骨折;面部软组织挫伤;膝关节积液;下肢静脉血栓形成;创伤性胸腔积液;肺部感染;膝挫伤;鼻出血;下肢静脉曲张;下肢动脉粥样硬化;肺结节	好转	李永领	李永领	李永领	股静脉穿刺术;下肢静脉滤器置入术
247	F02急诊创伤	2021-07-18	2021-07-25	3122779	蒋碎花	女	83Y	创伤性蛛网膜下腔出血	肺挫伤;多发性肋骨骨折;肺部感染;下肢深静脉血栓形成;下肢静脉血栓形成;高血压病;糖尿病;多发性脑梗死;颈动脉硬化;下肢动脉粥样硬化;陈旧性肋骨骨折	治愈	林露阳	林露阳	陈健2
248	F02急诊创伤	2021-10-25	2021-11-10	3160350	苏仕树	男	65Y	脑挫伤	头皮血肿;头皮擦伤;复视;眼挫伤;外踝骨折;脱髓鞘性白质脑病;小腿挫伤;肩部挫伤;高血压病;多发性脑梗死;下肢静脉血栓形成	治愈	朱烈烈	朱烈烈	朱烈烈
249	F02急诊创伤	2021-10-21	2021-11-14	3161483	叶松育	男	75Y	创伤性蛛网膜下腔出血	脑挫伤;创伤性硬膜下出血;面部软组织挫伤;外伤性硬脑膜下积液;下肢静脉血栓形成;后天性肾囊肿;骶尾部挫伤;腰椎骨折;下肢动脉粥样硬化;肺结节;骶骨骨折	好转	朱烈烈	朱烈烈	朱烈烈
250	F02急诊创伤	2021-10-30	2021-11-15	3162160	蔡桂英	女	51Y	创伤后伤口感染	2型糖尿病;陈旧性肋骨骨折;下肢动脉粥样硬化;下肢静脉血栓形成	好转	林露阳	项洪武	朱盈盈
251	F02急诊创伤	2021-11-21	2021-11-24	3165336	朱照南	男	79Y	股骨粗隆间骨折	后天性肾囊肿;男性盆腔炎;髋臼骨折;外伤性硬脑膜下积液;创伤性脑疝;下肢动脉粥样硬化;下肢静脉血栓形成;肺部感染;骨质疏松;主动脉瓣关闭不全;冠状动脉性心脏病;前列腺增生;前列腺钙化灶;胃部分后天性缺失;慢性支气管炎;肝囊肿	好转	林露阳	林露阳	林露阳
252	F02急诊创伤	2021-12-13	2021-12-29	3177316	陈秋香	女	59Y	脑震荡	下肢动脉粥样硬化;下肢静脉血栓形成;肾超声检查异常;腓骨骨折;大腿挫伤;膝关节副韧带扭伤;膝外侧半月板损伤;膝关节病;膝关节积液;低色素性小红细胞性贫血;脂肪肝	好转	林露阳	项洪武	朱盈盈	副韧带修补术;腓骨骨折切开复位钢针内固定术
253	F03观察病房	2021-03-08	2021-04-03	3084566	林万千	男	84Y	肺部感染	股骨粗隆间骨折;前列腺增生;甲状腺囊肿;非毒性多结节性甲状腺肿;下肢静脉血栓形成;肺气肿;特指手术后状态;甲状腺结节;颈动脉硬化;锁骨下动脉粥样硬化;肺大泡	好转	孙来芳	胡公义	苗敬伟
254	F03观察病房	2021-06-20	2021-07-25	3123013	钱云娥	女	54Y	腹部恶性肿瘤	淋巴结继发恶性肿瘤;高血压病;特指手术后状态;腰椎骨折;变态反应性支气管哮喘;低蛋白血症;低钠血症;股静脉血栓性静脉炎;脓毒血症;髂静脉血栓形成	好转	陈大庆	胡公义	胡公义
255	F03观察病房	2021-12-07	2021-12-13	3171640	胡美凤	女	72Y	后循环缺血	脑血管病后遗症;高血压Ⅱ期;胸椎骨折;颈椎关节强硬;脂肪肝;肾功能异常;颈动脉硬化;甲状腺结节;下肢动脉粥样硬化;下肢静脉血栓形成	好转	陈大庆	齐艳红	潘贤娟
256	F04脑外	2020-12-16	2021-01-26	3063692	胡爱莲	女	49Y	创伤性硬膜下出血	肺部感染;下肢静脉血栓形成;创伤性硬膜外出血;创伤性胸腔积液;创伤性脑梗塞;头皮血肿;创伤性脑疝;创伤性脑出血;创伤性蛛网膜下腔出血;脑干挫伤;额骨骨折	好转	张弩	周辉	尹波	暂时性气管切开术;颅骨切除减压术;脑膜切开伴硬脑膜下腔血肿清除术
257	F04脑外	2021-01-19	2021-02-04	3065089	陈彩萍	女	69Y	创伤性蛛网膜下腔出血	创伤性胸腔积液;眼挫伤;肺挫伤;脑挫伤;腰椎骨折;眶骨骨折;闭合性胫骨平台骨折;额骨骨折;下肢静脉血栓形成;阵发性室上性心动过速;下肢动脉粥样硬化;颅底骨折	好转	盛汉松	盛汉松	李丹东
258	F04脑外	2021-01-31	2021-03-02	3073940	袁高弟	男	70Y	创伤性硬膜下出血	脑挫伤;下肢静脉血栓形成;创伤性蛛网膜下腔出血;颅底骨折;颞骨骨折;颅腔积气;头皮血肿;肺挫伤;多发性肋骨骨折;肾结石	好转	盛汉松	林逢春	许尚虞	颅骨切除减压术;脑膜切开伴硬脑膜下腔血肿清除术
259	F04脑外	2021-02-11	2021-05-08	3095909	陈秀兰	女	58Y	创伤性蛛网膜下腔出血	肺大泡;下肢静脉血栓形成;创伤性胸腔积液;胫骨上端骨折;双踝骨折;脑挫伤;创伤性脑出血;髋臼骨折;肺部感染	好转	张弩	周辉	尹波	髋骨骨折切开复位钢板内固定术;胫骨骨折切开复位钢板内固定术;踝关节骨折切开复位钢板内固定术
260	F04脑外	2021-04-26	2021-05-15	3098658	李启发	男	77Y	大脑动脉血栓形成性脑梗死	大脑动脉狭窄脑梗死;滑膜疾患;老年性脑萎缩;陈旧性肋骨骨折;脂肪肝;心房颤动;肺部感染;胸腔积液;肱骨髁上骨折;肘关节关节病;膝关节病	好转	张弩	许尚虞	尹波	脑动脉造影;经皮颅内动脉取栓术;经皮大脑中动脉球囊扩张成形术
261	F04脑外	2021-06-28	2021-10-24	3153949	胡兰妹	女	70Y	创伤性硬膜下出血	脑挫伤;头皮挫伤;高血压病;下肢动脉粥样硬化;创伤性蛛网膜下腔出血;桡骨下端骨折;下肢静脉血栓形成;低钾血症	治愈	王怀瓯	陈彦克	方均浩	脑膜切开伴硬脑膜下腔血肿清除术;暂时性气管切开术;颅骨修补术;颅骨切除减压术
262	F04脑外	2021-12-14	2021-12-18	3173441	汤春柳	女	80Y	脑挫伤	肝胆管结石;下肢静脉血栓形成;下肢静脉曲张;创伤性硬膜外出血;多发性肋骨骨折;肺挫伤;胸腔积液;心功能不全;心脏扩大;心包积液;锁骨骨折;胸椎骨折;慢性肾衰竭;重度贫血	好转	盛汉松	林逢春	卢相琦
263	G04(神内+老年)	2021-03-06	2021-03-29	3082944	叶阿香	女	81Y	神经痛	腔隙性脑梗死;股骨颈骨折;高血压病;颈动脉硬化;下肢动脉粥样硬化;焦虑状态;锁骨下动脉粥样硬化;下肢静脉血栓形成;抑郁状态	好转	董其谦	郑国庆	郑国庆
264	G04(神内+老年)	2021-07-27	2021-08-21	3132737	郑庆真	男	72Y	大脑动脉闭塞脑梗死	颈动脉硬化;锁骨下动脉粥样硬化;下肢动脉粥样硬化;大隐静脉曲张;梅毒;下肢静脉血栓形成;荨麻疹;腰骶椎间盘突出;血管瘤;痛风;高血压病;骨质疏松;胸椎骨折;高脂血症;脂肪肝;后天性肾囊肿;肾结石;前列腺增生;痛风性关节炎;痛风石;肾病	好转	董其谦	邬伟	傅方望
265	G04(神内+老年)	2021-08-16	2021-08-24	3133597	郑碧琴	女	81Y	后循环缺血	高脂血症;肱骨上端骨折;桡骨下端骨折;下肢静脉血栓形成;颅骨肿瘤;胆囊结石;多发性肋骨骨折	好转	柯将琼	柯将琼	卢如意
266	G04(神内+老年)	2021-10-24	2021-11-20	3163645	尤帮言	男	80Y	脑梗死	脊柱压缩性骨折;胆囊结石;甲状腺结节;下肢动脉粥样硬化;锁骨下动脉粥样硬化;肾衰竭;2型糖尿病;血管性痴呆;颈动脉硬化;睡眠障碍;高血压病;下肢静脉血栓形成;急性肠炎;单纯性肾囊肿	好转	董其谦	徐珑珑	郑园园
267	G04(神内+老年)	2021-12-04	2021-12-18	3173308	林阿珠	女	83Y	脑梗死	高血压性心脏病;高血压病;2型糖尿病;下肢深静脉血栓形成;肾衰竭;呼吸道感染;颈动脉硬化;胸椎间盘突出;胆囊切除术后状态;后天性肾囊肿;肾错构瘤;脂肪肝;下肢动脉粥样硬化;先天性静脉扩张;脊柱压缩性骨折;冠状动脉粥样硬化性心脏病	好转	李勇	邵胜敏	郑园园
268	H07骨科综合病区	2020-12-18	2021-01-16	3059201	夏国平	男	60Y	闭合性胫骨平台骨折	半月板撕裂，近期的;腓骨骨折;膝挫伤;下肢深静脉血栓性静脉炎;膝关节十字韧带扭伤;膝关节副韧带扭伤	治愈	潘孝云	杨阳	许心弦	副韧带修补术;膝关节镜下半月板成形术;胫骨骨折切开复位钢板内固定术;膝关节镜下前十字韧带重建术;膝关节镜下半月板部分切除术
269	H07骨科综合病区	2021-02-27	2021-03-03	3074174	丁丛秀	女	70Y	股骨粗隆间骨折	房性早搏;室性早搏;肝囊肿;下肢动脉粥样硬化;下肢深静脉血栓形成;乙型病毒性肝炎;梅毒	好转	潘孝云	杨阳	林一木
270	H07骨科综合病区	2021-05-15	2021-05-31	3103757	方志翠	女	75Y	髌骨骨折	胆囊结石;后天性肾囊肿;下肢深静脉血栓形成;腘窝囊肿	治愈	潘孝云	杨阳	林一木	髌骨骨折切开复位张力带钢丝内固定术
271	H07骨科综合病区	2021-06-29	2021-07-11	3117826	刘碎奶	女	80Y	闭合性胫骨平台骨折	脑梗死;高血压病;脂肪肝;后天性肾囊肿;肺纤维化;主动脉瓣关闭不全;特指主动脉瓣疾患;心脏诊断性影像检查异常所见;先天性主动脉扩张;下肢深静脉血栓形成	治愈	汤骏	吴剑彬	吴剑彬	下肢静脉造影;胫骨骨折切开复位钢板内固定术;下腔静脉滤器置入术;膝关节镜检查;股静脉穿刺术
272	H07骨科综合病区	2021-10-07	2021-10-27	3155304	章王菊	女	90Y	股骨干骨折	高血压病;肺恶性肿瘤;胸腔积液;脂肪肝;下肢动脉粥样硬化;特指主动脉瓣疾患;心脏诊断性影像检查异常所见;下肢深静脉血栓形成	治愈	翁益民	翁益民	柯陈荣	股骨骨折切开复位钢板内固定术
273	H07骨科综合病区	2021-10-31	2021-11-06	3158889	陈三奶	女	66Y	闭合性胫骨平台骨折	糖尿病;高血压病;肾结石;下肢深静脉血栓形成;下肢动脉粥样硬化	治愈	成少安	成少安	成少安	石膏绷带固定
274	H07骨科综合病区	2021-12-13	2021-12-20	3174198	吴余益	男	46Y	双踝骨折	下肢静脉血栓形成;脂肪肝	治愈	洪建军	余洋	余贤斌	踝关节骨折切开复位螺钉内固定术
275	H08胸外	2021-05-20	2021-07-03	3114642	赵春招	女	70Y	肺中叶恶性肿瘤	胸椎骨折;腰椎骨折;高血压病;创伤性胸腔积液;下肢静脉血栓形成	好转	黄宪平	章岳峰	章岳峰	腰椎骨折球囊扩张成形术;淋巴结扩大性区域性切除术;胸椎骨折球囊扩张成形术;胸腔镜下肺叶部分切除术
276	H08胸外	2021-10-17	2021-10-21	3153268	郑竹春	女	84Y	股骨粗隆间骨折	高血压病;2型糖尿病;冠状动脉粥样硬化性心脏病;脂肪肝;后天性肾囊肿;下肢动脉粥样硬化;下肢静脉血栓形成;下肢深静脉血栓形成	好转	王振文	水小龙	卢迪
277	H10胆胰外科	2021-11-15	2021-12-13	3171449	陈金媛	女	74Y	胆囊结石伴急性胆囊炎	肱骨髁上骨折;肱骨外科颈骨折;掌骨骨折;下肢开放性伤口;上肢浅表损伤;肋骨骨折;下肢动脉粥样硬化;静脉栓塞和血栓形成;原发性肺动脉高压;下肢静脉血栓形成;股骨颈骨折;耻骨骨折;肺动脉高压中度;内踝骨折	好转	金洲祥	陈辉2	高静	胆囊造口术
278	H11颈部外科	2021-11-28	2021-12-11	3170844	谢阿华	女	72Y	髌骨骨折	陈旧性肺结核;高血压病;后天性肾囊肿;下肢静脉血栓形成;肾结石;下肢动脉粥样硬化	治愈	王振文	水小龙	何自力	髌骨骨折切开复位螺钉内固定术
279	H13内分泌血管外科	2020-12-30	2021-01-17	3059613	仇四玲	女	62Y	下肢静脉血栓形成	髌骨骨折;高血压病;胆囊结石;子宫平滑肌瘤;痔;高脂血症	好转	邓超频	陈聪	潘浩
280	H13内分泌血管外科	2021-01-18	2021-01-19	3060212	王碎蕊	女	67Y	下肢静脉血栓形成	高血压病;蛛网膜下腔出血;创伤性硬膜下出血;2型糖尿病;肋骨骨折;泌尿道感染;肺部感染;基底节出血;特指治疗后恢复期	治愈	邓超频	陈聪	郑继行	股静脉穿刺术;下腔静脉滤器置入术
281	H13内分泌血管外科	2021-02-13	2021-02-20	3070108	应法力	男	49Y	下肢静脉曲张	下肢皮肤感染;脂肪肝;高脂血症;静脉炎和血栓性静脉炎;左房扩大;慢性乙型病毒性肝炎;陈旧性肋骨骨折	治愈	邓超频	陈聪	郑继行	大隐静脉剥脱术;大隐静脉高位结扎剥脱术;下肢静脉剥脱术
282	H13内分泌血管外科	2021-04-15	2021-05-17	3099320	余佐全	男	64Y	闭合性胫骨平台骨折	下肢血肿;下肢动脉粥样硬化;下肢深静脉血栓形成;高血压病;2型糖尿病;胆囊结石;脂肪肝;脑梗死;基底节脑梗死;脑萎缩;特指脑梗死	治愈	邓超频	陈聪	郑继行	下肢静脉造影;下腔静脉滤器置入术;股静脉穿刺术;胫骨骨折切开复位钢板内固定术
283	H13内分泌血管外科	2021-05-01	2021-06-05	3105228	黄国祥	男	74Y	下肢动脉血栓形成	坏疽;肺结节;高尿酸血症;酒精性心肌病;老年性脑萎缩;室性早搏;窦性心动过速;跖骨骨折;心功能不全;高血压病;梅毒;心室扩大;二尖瓣及主动脉瓣关闭不全	治愈	邓超频	陈聪	潘浩	下肢动脉导管溶栓;大腿离断术
284	H13内分泌血管外科	2021-07-31	2021-08-03	3126081	付珠芽	女	59Y	取除下腔静脉滤器	下肢静脉血栓形成;髂静脉压迫综合征;外踝骨折;特指手术后状态	其他	邓超频	艾鹏	郑继行	下腔静脉滤器取出术;下肢静脉造影
285	H13内分泌血管外科	2021-07-03	2021-08-03	3126176	朱臣生	男	76Y	喉梗阻	下肢静脉血栓形成;下肢动脉粥样硬化;肺部感染;原发性甲状腺功能减退症;继发性肾上皮质功能减退症;肢端肥大症;呼吸衰竭;高血压性心脏病;陈旧性肋骨骨折;不完全性肠梗阻;胆囊结石	好转	吴朝明	钱掩映	施梦特	暂时性气管切开术;纤维喉镜下喉活检
286	H13内分泌血管外科	2021-08-11	2021-08-18	3131776	邵得胜	男	60Y	大隐静脉曲张	下肢血栓性静脉炎;高脂血症;陈旧性肋骨骨折;后天性肾囊肿;贫血	治愈	邓超频	艾鹏	郑继行	下肢静脉造影;大隐静脉高位结扎剥脱术
287	H13内分泌血管外科	2021-08-28	2021-09-07	3138774	刘坤	男	52Y	下肢深静脉血栓形成	髌骨骨折	好转	邓超频	陈聪	郑继行	下肢静脉造影
288	H13内分泌血管外科	2021-08-26	2021-09-11	3139753	黄明英	女	48Y	下肢深静脉血栓形成	髂静脉压迫综合征;骶骨骨折;耻骨骨折	治愈	邓超频	艾鹏	陈魁	静脉穿刺术;髂静脉球囊扩张成形术;下腔静脉滤器置入术;下肢静脉造影;下肢静脉导管溶栓
289	H13内分泌血管外科	2021-09-06	2021-09-25	3144429	黄红妹	女	54Y	下肢深静脉血栓形成	特指手术后状态;肋骨骨折;泌尿道感染	治愈	邓超频	郑继行	陈魁
290	H13内分泌血管外科	2021-09-03	2021-09-25	3144434	滕胜兴	男	87Y	胸椎骨折	前列腺结石;特指肾盂积水;胆囊胆固醇沉着症;多发性脑梗死;腹主动脉血栓形成;髂动脉瘤;下肢动脉硬化闭塞症;腹主动脉瘤;骨质疏松;脑卒中后遗症;高血压病;脂肪肝	治愈	邓超频	陈聪	陈魁	髂动脉瘤覆膜支架置入术;腹主动脉覆膜支架腔内隔绝术;胸椎骨折球囊扩张成形术;股动脉穿刺术
291	H13内分泌血管外科	2021-10-19	2021-10-27	3155472	应清和	男	79Y	下肢深静脉血栓形成	心房颤动;桡骨下端骨折;尺骨茎突骨折;多发性脑梗死;前列腺增生;脂肪肝;胆囊息肉;后天性肾囊肿;下肢动脉粥样硬化	好转	邓超频	艾鹏	郑继行	下肢静脉造影
292	H13内分泌血管外科	2021-10-16	2021-10-28	3155639	何招霞	女	45Y	下肢深静脉血栓形成	取除骨折内固定装置;高血压病	治愈	邓超频	陈聪	陈魁	下肢静脉造影;锁骨内固定物取出术;髂静脉支架置入术;下肢静脉支架置入术;髂静脉球囊扩张成形术;下肢静脉球囊扩张成形术
293	H13内分泌血管外科	2021-11-09	2021-11-17	3162728	杨凤叶	女	79Y	下肢深静脉血栓形成	下肢动脉粥样硬化;高血压病;2型糖尿病;肾结石;陈旧性肋骨骨折	好转	邓超频	陈聪	陈魁	下肢静脉造影
294	H13内分泌血管外科	2021-12-13	2021-12-20	3174007	敖叨荣	男	65Y	下肢深静脉血栓形成	高血压病;腔隙性脑梗死;腰椎骨折;肝囊肿;肾结石;后天性肾囊肿;前列腺增生	治愈	邓超频	陈聪	陈魁	下肢静脉造影;股静脉穿刺术;髂静脉球囊扩张成形术;下腔静脉滤器置入术
295	H14呼吸内科	2021-05-19	2021-05-20	3100191	姚锡坤	男	55Y	下肢深静脉血栓形成	脑挫伤;颅骨骨折;颞骨骨折;肋骨骨折;腰椎骨折;髂骨骨折;特指手术后状态;创伤性蛛网膜下腔出血	好转	邓超频	陈聪	陈魁	下肢静脉造影;下肢静脉滤器置入术;股静脉穿刺术
296	H14呼吸内科	2021-06-05	2021-07-03	3114628	周玉香	女	87Y	肺栓塞	呼吸衰竭;慢性阻塞性肺病伴急性加重;股骨粗隆间骨折;肺部感染;冠状动脉粥样硬化性心脏病;心功能不全;具有心脏起搏器;下肢静脉血栓形成;支气管扩张	好转	徐慧	徐慧	章国棉	股骨骨折闭合复位髓内针内固定术
297	H14呼吸内科	2021-06-24	2021-07-26	3123058	赵跃森	男	83Y	肺部感染	胸腔积液;下肢静脉血栓形成;心房颤动;股骨粗隆间骨折	好转	林洁2	林洁2	林慧	股骨骨折闭合复位髓内针内固定术
298	H14呼吸内科	2021-10-08	2021-11-02	3157551	林菊香	女	76Y	肺恶性肿瘤	臂骨折后遗症;下肢动脉粥样硬化;阻塞性肺气肿;下肢静脉血栓形成;特指脑梗死;高血压病;恶性胸腔积液;脱髓鞘性脑病	好转	夏晓东	徐慧	徐慧
299	H16血液内科	2020-12-27	2021-01-27	3063910	林陈菊	女	80Y	髋关节半脱位	泌尿道感染;肋骨骨折;髂骨骨折;肩胛骨骨折;跟骨骨折;高血压病;药物性血小板减少症;中度贫血;下肢特指深部脉管静脉炎和血栓性静脉炎;下肢动脉粥样硬化	好转	林颖	林晓骥	黄河2	跟骨骨折切开复位钢板内固定术;髋关节脱位切开复位内固定术
300	H16血液内科	2021-09-06	2021-09-30	3146725	戴送对	男	79Y	恶性肿瘤化学治疗后随诊检查	肺部感染;阵发性心房纤颤;外周T细胞淋巴瘤;胆囊结石;胸椎骨折;股静脉血栓性静脉炎	其他	姚荣欣	何牧卿	周晓海
301	H16血液内科	2021-11-23	2021-11-30	3167070	陈阿暖	女	80Y	血小板减少症	下肢静脉血栓形成;凝血缺陷;骨折治疗后恢复期	好转	林颖	林颖	孙妮	骨髓穿刺术（骨穿）
302	K02康复	2021-06-06	2021-06-14	3108501	刘万荣	男	43Y	脑挫伤	面骨骨折;眼球挫伤;抑郁状态;运动障碍;大便失禁;创伤后尿失禁;下肢静脉血栓形成	好转	屠文展	林海燕2	林心心
303	K02康复	2021-07-03	2021-08-11	3128901	吴凤珠	女	57Y	脊髓损伤	消化道出血;胆囊结石;腰椎骨折;胸椎骨折;大便失禁;泌尿道感染;缺铁性贫血;低蛋白血症;下肢静脉血栓形成;神经源性膀胱;截瘫;神经源性肠	好转	屠文展	林海燕2	林心心
304	K02康复	2021-08-11	2021-09-09	3139281	吴凤珠	女	57Y	胸部脊髓损伤	胸椎骨折;胆囊结石;泌尿道感染;下肢静脉血栓形成;低蛋白血症;缺铁性贫血;尿潴留;神经源性膀胱;截瘫;神经源性肠;大便失禁	好转	屠文展	林海燕2	林心心
305	K02康复	2021-09-11	2021-10-22	3153158	吴凤珠	女	57Y	胸部脊髓损伤	低蛋白血症;下肢静脉血栓形成;神经源性肠;缺铁性贫血;泌尿道感染;胆囊结石;神经源性膀胱;胸椎骨折;大便失禁;尿潴留;截瘫	好转	屠文展	林海燕2	林心心
306	K02康复	2021-11-07	2021-12-15	3172551	郑学锡	男	62Y	颈部脊髓损伤	四肢瘫痪;神经源性膀胱;神经源性肠;泌尿道感染;肺部感染;胸腔积液;高血压病;下肢动脉粥样硬化;下肢静脉血栓形成;肋骨骨折;颈椎骨折;具有心脏起搏器;寰枢关节扭伤;腔隙性脑梗死;后天性肾囊肿;肾结石;面部挫伤;皮肤挫伤	好转	蒋松鹤	卢君艳	邹恩苗
307	K02康复	2021-11-10	2021-12-25	3175800	吴凤珠	女	58Y	胸部脊髓损伤	神经源性膀胱;大便失禁;截瘫;神经源性肠;尿潴留;颈椎关节强硬;高脂血症;陈旧性胸椎骨折;陈旧性腰椎骨折;高血压病;胆囊结石;下肢静脉血栓形成;下肢动脉粥样硬化;缺铁性贫血	好转	屠文展	林海燕2	程博
308	K06康复	2021-01-25	2021-02-07	3065919	周宪	男	61Y	颈部脊髓损伤	胸椎骨折;肺大泡;肺气肿;神经源性膀胱;神经源性肠;不完全截瘫;静脉栓塞和血栓形成;第二颈椎骨折;室性早搏;尺骨上端骨折;肋骨骨折	好转	蒋松鹤	卢君艳	高丽萍
309	K06康复	2020-12-27	2021-02-14	3068403	朱献义	男	65Y	颈部脊髓损伤	声带麻痹;颅骨骨折;髂骨骨折;掌骨骨折;创伤性硬膜外血肿;特指手术后状态;多发性颈椎骨折;高血压病;下肢静脉血栓形成;颈动脉硬化	好转	蒋松鹤	卢君艳	程博
310	K06康复	2021-02-03	2021-03-06	3075243	罗海英	女	53Y	颈部脊髓特指损伤	特指手术后状态;多发性骨折;眶骨骨折;鼻骨骨折;肋骨骨折;腰椎峡部裂;下肢静脉血栓形成;肝功能异常;高血压病;泌尿道感染;截瘫;神经源性膀胱;胸骨骨折;颅骨骨折;脑挫伤	好转	蒋松鹤	卢君艳	高丽萍
311	K06康复	2021-02-04	2021-03-08	3075976	陈彩萍	女	69Y	关节僵硬	半月板撕裂，近期的;膝关节副韧带扭伤;闭合性胫骨平台骨折;手术后恢复期;下肢动脉硬化闭塞症;高脂血症;静脉栓塞和血栓形成;特指手术后状态;多发性骨折;颅内损伤;膝关节十字韧带扭伤;低钾血症	好转	蒋松鹤	卢君艳	林乐2
312	K06康复	2021-02-14	2021-03-20	3079439	朱献义	男	65Y	颈部脊髓损伤	声带麻痹;胸腔积液;特指动脉动脉粥样硬化;特指骨质疏松伴病理性骨折;特指手术后状态;掌骨骨折;颅骨骨折;髂骨骨折;下肢静脉血栓形成;下肢动脉硬化闭塞症;颈动脉硬化;高血压病;脊柱骨折;多发性骨折;多发性颅骨骨折;硬膜外血肿	好转	蒋松鹤	卢君艳	邹恩苗
313	K06康复	2021-04-13	2021-05-18	3099476	罗海英	女	54Y	神经源性膀胱	肝功能异常;多发性肋骨骨折;眶骨骨折;鼻骨骨折;颅骨骨折;腰椎骨折;神经源性肠;下肢静脉血栓形成;腰椎间盘突出;颈椎间盘突出;脊髓损伤;腰椎滑脱;创伤性截瘫	好转	蒋松鹤	卢君艳	高丽萍
314	K06康复	2021-05-04	2021-06-05	3105611	郑福郎	男	60Y	脊髓损伤	2型糖尿病;神经源性肠;冠状动脉粥样硬化;冠状动脉支架植入后状态;颈椎间盘突出;颈椎退行性病变;脂肪肝;下肢静脉血栓形成;胸腔积液;神经源性膀胱;多发性肋骨骨折;泌尿道感染;腰椎骨折;创伤性截瘫;高血压病	好转	蒋松鹤	卢君艳	邹恩苗
315	K06康复	2021-05-29	2021-07-03	3115018	罗海英	女	54Y	脊髓损伤	下肢静脉血栓形成;截瘫;多发性肋骨骨折;神经源性肠;特指手术后状态;胸椎骨折;颈椎间盘突出;腰椎间盘突出;脊椎前移;神经源性膀胱;泌尿道感染;颅骨骨折;鼻骨骨折;眶骨骨折	好转	蒋松鹤	卢君艳	高丽萍
316	K06康复	2021-06-19	2021-07-18	3120400	郑福郎	男	60Y	脊髓损伤	肋骨骨折;颈椎退行性病变;颈椎间盘突出;冠状动脉支架植入后状态;冠状动脉粥样硬化;截瘫;神经源性膀胱;神经源性肠;泌尿道感染;前臂尺神经损伤;胸椎骨折;高血压病;2型糖尿病;特指手术后状态;脂肪肝;下肢静脉血栓形成	好转	蒋松鹤	卢君艳	高丽萍
317	K06康复	2021-07-06	2021-08-12	3129293	张华	男	54Y	肱骨上端骨折	膝关节僵硬;特指手术后状态;肩部挫伤;上臂挫伤;髋关节僵硬;创伤性硬膜外出血;肩袖损伤;肩关节僵硬;肋骨骨折;下肢静脉血栓形成	好转	蒋松鹤	郑余银	陈文斯
318	K06康复	2021-08-09	2021-09-13	3140396	童彩仙	女	80Y	尺骨桡骨远端骨折	下肢动脉粥样硬化;下肢静脉血栓形成;腔隙性脑梗死;高血压病;股骨粗隆间骨折;后天性肾囊肿;脂肪肝;糖尿病	好转	蒋松鹤	郑余银	李慧芳
319	K06康复	2021-08-28	2021-09-15	3141134	郑福郎	男	60Y	脊髓损伤	截瘫;腰椎骨折;神经源性肠;前臂尺神经损伤;胸部挫伤;胸椎骨折;肋骨骨折;下肢静脉血栓形成;高血压病;2型糖尿病;脂肪肝;颈椎关节强硬;冠状动脉支架植入后状态;冠状动脉粥样硬化;颈椎间盘突出;具有特指功能性植入物;第二颈椎骨折	好转	蒋松鹤	卢君艳	邹恩苗
320	K06康复	2021-08-14	2021-09-15	3141545	张华	男	54Y	股骨骨折	肩部损伤;上臂挫伤;膝关节僵硬;肱骨上端骨折;肋骨骨折;髋关节僵硬;肩关节僵硬;高脂血症;下肢静脉血栓形成;肩袖损伤	好转	蒋松鹤	郑余银	林乐2
321	K06康复	2021-08-21	2021-09-29	3146012	蔡兰芳	女	69Y	髌骨骨折	下肢静脉血栓形成;高脂血症	好转	蒋松鹤	卢君艳	邹恩苗
322	K06康复	2021-09-18	2021-10-20	3152952	童彩仙	女	80Y	股骨粗隆间骨折	脂肪肝;尺骨桡骨闭合性骨折;高血压病;糖尿病;腔隙性脑梗死;下肢静脉血栓形成;后天性肾囊肿;下肢动脉粥样硬化	好转	蒋松鹤	郑余银	李慧芳
323	K06康复	2021-10-23	2021-11-07	3159276	童彩仙	女	81Y	股骨粗隆间骨折	尺骨桡骨远端骨折;高血压病;糖尿病;腔隙性脑梗死;晕厥和虚脱;下肢动脉粥样硬化;脂肪肝;后天性肾囊肿;肺栓塞;下肢静脉血栓形成	未愈	蒋松鹤	郑余银	林乐2
324	K06康复	2021-10-09	2021-11-10	3160516	汪德楷	男	63Y	脊髓损伤	截瘫;创伤性胸腔积液;膝关节十字韧带扭伤;骨密度和结构特指疾患;膝关节积液;半月板损伤;膝关节副韧带扭伤;肩胛骨骨折;下肢动脉粥样硬化;继发性单侧膝关节病;下肢静脉血栓形成	好转	蒋松鹤	卢君艳	邹恩苗
325	K06康复	2021-10-20	2021-11-14	3161801	黄凤娇	女	86Y	膝关节僵硬	老年性痴呆;颈动脉硬化;下肢动脉粥样硬化;静脉栓塞和血栓形成;涉及骨折板和特指内固定装置的随诊医疗;脂肪肝;肾结石;陈旧性肋骨骨折;多发性脑梗死;高血压病	好转	屠文展	林海燕2	林心心
326	N12妇科	2021-11-28	2021-12-09	3170208	潘绣娟	女	36Y	股骨干骨折	妊娠合并子宫瘢痕;面部挫伤;妊娠合并脂肪肝;妊娠合并肾积水;妊娠合并血栓形成	治愈	耿筱虹	耿筱虹	舒莉	股骨骨折切开复位髓内针内固定术
327	N15心血管内科	2021-02-03	2021-03-03	3074182	刘松波	男	75Y	胸椎骨折	腰椎骨折;骨质疏松;胸椎椎管狭窄;1型糖尿病;冠状动脉血栓形成;冠状动脉粥样硬化性心脏病;胸部脊髓损伤;低蛋白血症;高血压病	好转	林丛	黄明远	毛艳雪	椎弓根钉内固定术;经皮冠状动脉药物洗脱支架置入术;腰椎骨折球囊扩张成形术;脊椎骨折复位术
328	N15心血管内科	2021-05-29	2021-06-08	3106712	黄玉妹	女	76Y	肺部感染	心包积液;精神障碍;胸腔积液;低蛋白血症;特指手术后状态;肺动脉高压轻度;颈动脉硬化;陈旧性肋骨骨折;下肢动脉粥样硬化;下肢静脉血栓形成	好转	林丛	黄明远	黄隐青
329	N16心血管内科	2021-01-17	2021-01-19	3060429	陈彩萍	女	69Y	阵发性室上性心动过速	特指手术后状态;下肢静脉血栓形成;多发性骨折;多发性损伤;面部损伤;静脉栓塞和血栓形成;肺挫伤;创伤性蛛网膜下腔出血;脑挫伤;胫骨骨折;骨盆骨折;腰椎骨折;眶骨骨折;颅底骨折;额骨骨折;胸腔积液;下肢动脉粥样硬化	好转	季亢挺	宋喜发	殷日鹏	经皮心脏射频消融术
330	N16心血管内科	2021-06-05	2021-06-15	3108721	程汉凤	女	65Y	扩张型心肌病	下肢静脉血栓形成;二尖瓣关闭不全;风湿性三尖瓣关闭不全;原发性肺动脉高压;心功能Ⅲ级;后天性肾囊肿;肋骨骨折	好转	李岳春	宋静	潘样岐	永久起搏器置入术
331	N17心血管内科	2021-03-29	2021-04-10	3086673	黄为浦	男	69Y	冠状动脉粥样硬化性心脏病	闭合性胫骨平台骨折;膝关节十字韧带扭伤;半月板撕裂，近期的;后天性肾囊肿;前列腺增生;前列腺结石;2型糖尿病;下肢动脉粥样硬化;下肢深静脉血栓形成;亚临床甲状腺功能减退症	好转	李嘉	马骏	马骏	单根导管冠状动脉造影;经皮冠状动脉支架置入术;冠状动脉血管内超声(IVUS)
332	N17心血管内科	2021-05-15	2021-06-10	3107206	沈和英	女	78Y	肱骨上端骨折	下肢动脉粥样硬化;肾衰竭;下肢深静脉血栓形成;肝回声不均;后天性肾囊肿;冠状动脉粥样硬化性心脏病;冠状动脉狭窄;脂肪肝	好转	李继武	周野	周野	经皮冠状动脉药物洗脱支架置入术;单根导管冠状动脉造影;肱骨骨折切开复位钢板内固定术;经皮冠状动脉支架置入术
333	N17心血管内科	2021-10-29	2021-11-16	3162424	徐双玉	女	77Y	股骨粗隆间骨折	冠状动脉粥样硬化性心脏病;心功能Ⅳ级;肺部感染;下肢深静脉血栓形成;中度贫血;下肢动脉粥样硬化;胸腔积液	好转	李继武	周野	周野	股骨骨折切开复位髓内针内固定术
首页	尾页
骨折+肺栓塞
序号	出院科室	入院日期	出院日期	病案号	病人	性别	年龄	主诊断	非主诊断	转归	主任	主治	住院	手术
					姓名					情况	医师	医师	医师	名称
1	D10(创伤2)	2021-11-03	2021-12-08	3169898	陈正海	男	77Y	股骨颈骨折	脂肪肝;睡眠呼吸暂停;脑萎缩;高血压病;帕金森病;肺部感染;前列腺增生;急性冠脉综合征;肺栓塞;慢性呼吸衰竭;后天性肾囊肿;胆囊内胆汁郁积	好转	黄俊武	王鉴顺	王鉴顺	人工股骨头置换术
2	D15颈椎外科、腰椎外科	2021-05-23	2021-06-22	3111177	施心君	女	71Y	颈部脊髓损伤	肺部感染;颈椎椎管狭窄;腰椎骨折;子宫切除术后状态;肺栓塞;截瘫;颈椎间盘突出;颈椎退行性病变;高血压病;下肢动脉粥样硬化	治愈	林焱	盛孙仁	盛孙仁	颈椎后路单开门椎管减压术;腰椎骨折球囊扩张成形术
3	D21ICU	2021-05-17	2021-06-26	3112671	仇深达	男	52Y	大肠杆菌败血症	2型糖尿病;下肢深静脉血栓形成;多发性肋骨骨折;肺栓塞;感染性休克;肺部感染;腹壁挫伤;肾衰竭;泌尿道感染;肺挫伤;创伤性胸腔积液;创伤性气胸;呼吸衰竭	未愈	林孟相	魏大臻	魏大臻	肋骨骨折切开复位螺钉内固定术
4	H14呼吸内科	2021-02-20	2021-03-20	3079931	缪阿德	男	85Y	慢性阻塞性肺病伴急性加重	呼吸衰竭;肺栓塞;胸椎骨折;肺部感染	死亡	翁海霞	徐慧	徐慧
5	H14呼吸内科	2021-06-05	2021-07-03	3114628	周玉香	女	87Y	肺栓塞	呼吸衰竭;慢性阻塞性肺病伴急性加重;股骨粗隆间骨折;肺部感染;冠状动脉粥样硬化性心脏病;心功能不全;具有心脏起搏器;下肢静脉血栓形成;支气管扩张	好转	徐慧	徐慧	章国棉	股骨骨折闭合复位髓内针内固定术
6	H14呼吸内科	2021-10-06	2021-11-02	3157226	詹桂枝	女	66Y	肺栓塞	肱骨骨折;多发性肋骨骨折;高血压病;胸腔积液;肺挫伤;肺结节	好转	颜孙舜	颜孙舜	章国棉	肱骨骨折切开复位钢板内固定术
7	H14呼吸内科	2021-11-01	2021-11-20	3163824	刘甫德	男	78Y	肺栓塞	腰椎骨折;腰椎间盘突出;高血压病;肺动脉高压中度;特指脑梗死;后天性肾囊肿	好转	夏晓东	章国棉	章国棉
8	K06康复	2021-10-23	2021-11-07	3159276	童彩仙	女	81Y	股骨粗隆间骨折	尺骨桡骨远端骨折;高血压病;糖尿病;腔隙性脑梗死;晕厥和虚脱;下肢动脉粥样硬化;脂肪肝;后天性肾囊肿;肺栓塞;下肢静脉血栓形成	未愈	蒋松鹤	郑余银	林乐2
9	N15心血管内科	2021-11-20	2021-12-12	3171311	刘甫德	男	78Y	腰椎骨折	多发性肋骨骨折;高血压心脏病伴心力衰竭;心房颤动;心功能Ⅲ级;急性上呼吸道感染;后天性肾囊肿;椎间盘膨隆;肺气肿;下肢动脉粥样硬化;肺栓塞;骨质疏松;脑梗死;肺动脉高压重度;脓毒血症	好转	陈鹏	张新民	叶盛	腰椎骨折球囊扩张成形术
10	N16心血管内科	2021-07-29	2021-08-21	3132367	谢作枪	男	68Y	急性非ST段抬高型心肌梗塞	下肢动脉硬化闭塞症;下肢动脉粥样硬化;腔隙性脑梗死;冠状动脉粥样硬化性心脏病;心功能Ⅳ级;高血压病;2型糖尿病;肺栓塞;股骨颈骨折;中度贫血;肺部感染;胆囊结石;胆囊息肉;后天性肾囊肿;前列腺增生	好转	李岳春	宋静	潘样岐	股骨骨折闭合复位螺钉内固定术;经皮冠状动脉支架置入术
首页	尾页
