# Supplementary material for: Variable Rate of D-dimer Predicts Venous Thromboembolism in Postoperative Fracture Patients: A Single-Center Retrospective Cohort Study
Source: Research Square preprint supplement (doi:10.21203/rs.3.rs-7878480/v1), 2025-12-09
Supplement: Supplementary file 6 [file 945660d9bbb6b1e730d67cff.xlsx]

## Sheet: Sheet1
骨折+血栓
序号	出院科室	入院日期	出院日期	病案号	病人	性别	年龄	主诊断	非主诊断	转归	主任	主治	住院	手术
					姓名					情况	医师	医师	医师	名称
1	C03眼科口腔	2022-05-03	2022-05-15	3225141	李显兰	女	55Y	玻璃体损伤	双眼白内障;特指手术后状态;创伤性晶状体脱位;肋骨骨折;腰椎骨折;颅骨骨折;眶骨骨折;下肢静脉血栓形成	好转	郑穗联	查屹	郭燕	后入路玻璃体切割术;白内障超声乳化摘除术+人工晶体植入术（微切口）
2	C03眼科口腔	2022-07-02	2022-07-09	3245878	张东明	男	23Y	眶骨骨折	下肢静脉血栓形成;鼻骨骨折;上颌骨骨折	治愈	冯旺强	杨顺海	林达	上颌骨骨折切开复位固定术;眶骨骨折闭合复位术
3	C04综合病房	2022-03-07	2022-03-08	3200522	苏宗俭	男	72Y	下肢深静脉血栓形成	脊髓损伤;骨折治疗后恢复期;气管造口状态;胸腔积液;高血压病;肺部感染	治愈	邓超频	陈聪	陈魁	股静脉穿刺术;下腔静脉滤器置入术
4	C04综合病房	2022-04-26	2022-05-21	3227095	谢纯亲	男	49Y	脾损伤	多发性肋骨骨折;多发性胸椎骨折;多处挫伤;创伤性胸腔积液;前列腺钙化灶;颈椎间盘突出;腰和特指椎间盘疾患伴有脊髓病;创伤性气胸;耻骨骨折;腰椎骨折;颈椎关节强硬;肝钙化灶;肺挫伤;下肢静脉血栓形成	治愈	倪仲琳	黄和	潘传孟
5	C04综合病房	2022-07-23	2022-07-24	3252234	陈笑萍	女	61Y	取除骨折内固定装置	腰椎退行性病变;下肢静脉炎和血栓性静脉炎;肝囊肿;下肢动脉粥样硬化	其他	陈龙	陈龙	应晓洲	跖骨内固定物取出术
6	C05疼痛科	2022-01-05	2022-01-15	3182674	林永钗	女	89Y	急性冠脉综合征	急性心肌梗死;心力衰竭;呼吸衰竭;肺部感染;骨质疏松伴病理性骨折;耻骨骨折;2型糖尿病;心房颤动;下肢静脉血栓形成;人工髋关节;高血压病	未愈	占恭豪	占恭豪	田心毅
7	C05疼痛科	2022-01-29	2022-02-06	3190406	温菊媛	女	85Y	骨质疏松	脊柱骨折;下肢静脉血栓形成	好转	占恭豪	占恭豪	田心毅
8	C05疼痛科	2022-07-16	2022-07-23	3251337	邹多妹	女	74Y	骨质疏松伴病理性骨折	低色素性贫血;下肢静脉血栓形成	好转	许峰	王佩芳	田心毅
9	C05疼痛科	2022-08-07	2022-08-12	3259911	陈景云	男	72Y	恶性肿瘤的维持性化疗	后天性肾囊肿;慢性上颌窦炎;颈动脉硬化;下肢动脉粥样硬化;喉恶性肿瘤;腰椎骨折;2型糖尿病;老年性脑萎缩;锁骨下静脉血栓形成;上肢静脉血栓形成;肺气肿	好转	吴剑	吴剑	张曦
10	C05疼痛科	2022-11-12	2022-11-14	3295668	王爵飞	男	80Y	肺恶性肿瘤	下肢静脉血栓形成;呼吸衰竭;慢性阻塞性肺病;慢性肺源性心脏病;心功能不全;心律失常;心房颤动;肝功能不全;低蛋白血症;高钾血症;凝血缺陷;下肢动脉粥样硬化;多发性脑梗死;主动脉钙化;高脂血症;肝囊肿;后天性肾囊肿;前列腺增生;髋臼骨折	未愈	吴剑	吴剑	黄选章
11	C06肿瘤放化疗、神经康复	2022-01-26	2022-03-07	3200284	陈锡金	男	90Y	脑梗死	后天性肾囊肿;肾结石;肝钙化灶;肾上腺囊肿;陈旧性肋骨骨折;手术后恢复期;言语障碍;轻度认知障碍;进食障碍;大便失禁;由于活动能力降低而需要帮助;多发性脑梗死;肺部感染;胸腔积液;高血压病;低钠血症;股动脉血栓形成;下肢动脉粥样硬化	好转	刘宝华	刘宝华	商萍	膀胱造口术
12	C06肿瘤放化疗、神经康复	2022-04-09	2022-04-27	3218122	周月槎	男	93Y	脑梗死	陈旧性肺结核;血管瘤;低钠血症;低钾血症;下肢静脉血栓形成;胸腔积液;肺部感染;肝囊肿;前列腺增生;前列腺结石;病理性骨折;陈旧性肋骨骨折;出血性脑梗死;特定性运动功能发育障碍;后天性肾囊肿;老年性脑萎缩;言语障碍;进食障碍;高血压病	好转	刘宝华	刘宝华	吕德钊
13	C06肿瘤放化疗、神经康复	2022-03-01	2022-04-28	3218893	张美翠	女	82Y	脑梗死	急性心肌梗死;陈旧性肋骨骨折;颈动脉硬化;言语障碍;由于活动能力降低而需要帮助;子宫切除术后状态;进食障碍;高血压病;低蛋白血症;低钾血症;偏瘫;冠状动脉粥样硬化性心脏病;脑出血;下肢静脉血栓形成;肺部感染;泌尿道感染;肾错构瘤	好转	刘宝华	刘宝华	吕德钊	经外周静脉穿刺中心静脉插管术[PICC]
14	C06肿瘤放化疗、神经康复	2022-04-28	2022-05-02	3220441	张美翠	女	83Y	脑梗死	颈动脉硬化;高血压病;进食障碍;子宫切除术后状态;特指治疗后恢复期;言语障碍;循环系统特指操作后疾患;特定性运动功能发育障碍;陈旧性肋骨骨折;肾错构瘤;泌尿道感染;肺部感染;下肢静脉血栓形成;脑出血;冠状动脉粥样硬化性心脏病;偏瘫	好转	刘宝华	刘宝华	吕德钊
15	C06肿瘤放化疗、神经康复	2022-05-17	2022-06-01	3231281	谢美莲	女	60Y	创伤性蛛网膜下腔出血	由于活动能力降低而需要帮助;创伤性硬膜下出血;下腔静脉血栓形成;高血压病;轻度认知障碍;2型糖尿病;头部外伤;脑挫伤;枕骨骨折;贫血;高脂血症;特指手术后状态	好转	刘宝华	商萍	黄婷婷2
16	C06肿瘤放化疗、神经康复	2022-05-02	2022-06-08	3233915	张美翠	女	83Y	脑梗死	颈动脉硬化;下肢动脉粥样硬化;高血压病;进食障碍;陈旧性肋骨骨折;肾错构瘤;泌尿道感染;肺部感染;下肢静脉血栓形成;脑出血;冠状动脉粥样硬化性心脏病;偏瘫;低钾血症;低蛋白血症;言语障碍;子宫切除术后状态;由于活动能力降低而需要帮助	好转	刘宝华	刘宝华	吕德钊
17	C06肿瘤放化疗、神经康复	2022-05-25	2022-06-25	3240254	叶玉霞	女	82Y	肺栓塞	冠状动脉支架植入后状态;单纯性肾囊肿;特指肾盂积水;胆囊结石;下肢特指深部脉管静脉炎和血栓性静脉炎;特指动脉动脉粥样硬化;老年性脑萎缩;特定性运动功能发育障碍;2型糖尿病;陈旧性肋骨骨折;泌尿道感染;肺部感染;冠状动脉粥样硬化性心脏病	好转	刘宝华	商萍	吕德钊	下肢静脉滤器置入术
18	C06肿瘤放化疗、神经康复	2022-07-13	2022-07-27	3251347	陈景云	男	72Y	为肿瘤化学治疗疗程	喉恶性肿瘤;静脉栓塞和血栓形成;肺气肿;后天性肾囊肿;慢性上颌窦炎;老年性脑萎缩;下肢动脉粥样硬化;腰椎骨折;2型糖尿病;颈动脉硬化	好转	吴剑	吴剑	张曦
19	C06肿瘤放化疗、神经康复	2022-05-30	2022-08-14	3260579	占月秀	女	63Y	颅内损伤	颈内静脉血栓形成;骨盆骨折;多发性肋骨骨折;肩胛骨骨折;肺挫伤;消化道出血;失血性休克;特指手术后状态;皮肤和皮下组织局部感染;肺部感染;泌尿道感染;低蛋白血症;下肢特指深部脉管静脉炎和血栓性静脉炎;颈动脉硬化;腰椎间盘突出;高尿酸血症	好转	刘宝华	商萍	覃燕青
20	C06肿瘤放化疗、神经康复	2022-08-20	2022-08-29	3266589	邹祖祥	男	85Y	脑梗死	言语障碍;轻度认知障碍;神经源性肠;由于活动能力降低而需要帮助;肺部感染;Ⅲ期褥疮;股骨颈骨折;下肢特指深部脉管静脉炎和血栓性静脉炎;主动脉瓣硬化;心动过缓;高血压病;肺结节;脂肪肝;冠状动脉粥样硬化(狭窄);颈动脉硬化;下肢动脉粥样硬化	未愈	刘宝华	商萍	胡晓晓
21	C06肿瘤放化疗、神经康复	2022-06-12	2022-09-18	3274361	徐忠忠	女	89Y	股骨粗隆间骨折	脑梗死;下肢静脉血栓形成;痴呆;肺部感染;泌尿道感染;运动障碍;由于活动能力降低而需要帮助;言语障碍;吞咽困难;特指癫痫;高血压病;2型糖尿病;后天性肾囊肿;肾结石;肝囊肿;颈动脉硬化;锁骨下动脉粥样硬化;低蛋白血症;脑血管病后遗症	好转	刘宝华	商萍	覃燕青	股骨骨折闭合复位螺钉内固定术
22	C06肿瘤放化疗、神经康复	2022-10-21	2022-10-31	3290504	李扎孝	男	53Y	恶性肿瘤的维持性化疗	手术后恶性肿瘤化学治疗;颈部淋巴结继发恶性肿瘤;骨继发恶性肿瘤;静脉栓塞和血栓形成;2型糖尿病性视网膜病变;黄斑水肿;双眼白内障;慢性乙型病毒性肝炎;肺结节;骨折治疗后恢复期	好转	吴剑	吴剑	黄选章
23	C06肿瘤放化疗、神经康复	2022-10-12	2022-11-23	3299331	王岩寿	男	42Y	病毒性脑膜炎	肋骨骨折;胆囊结石;高血压病;气管造口状态;急性脊髓炎;由于活动能力降低而需要帮助;特指颈椎间盘变性;肺部感染;泌尿道感染;下肢特指深部脉管静脉炎和血栓性静脉炎	好转	刘宝华	商萍	吕德钊	经外周静脉穿刺中心静脉插管术[PICC];支气管镜检查术
24	C06肿瘤放化疗、神经康复	2022-09-19	2022-12-04	3303450	徐忠忠	女	90Y	脑血管病后遗症	泌尿道感染;肺部感染;2型糖尿病;后天性肾囊肿;肾结石;肝囊肿;颈动脉硬化;双眼白内障;静脉栓塞和血栓形成;增生性牙龈炎;痴呆;骨质疏松伴病理性骨折;股骨粗隆间骨折;运动障碍;特定性运动功能发育障碍;言语障碍;进食障碍;特指癫痫;Ⅱ期褥疮	好转	刘宝华	商萍	覃燕青
25	C10感染内科	2022-01-30	2022-02-21	3195515	林蓉蓉	女	81Y	细菌性肝脓肿	肺部感染;2型糖尿病;颈动脉硬化;下肢静脉血栓形成;胆囊息肉;肾结石;痴呆;股骨骨折后遗症;下肢动脉粥样硬化	好转	诸葛璐	李杰	吴佐罗
26	C10感染内科	2022-08-10	2022-08-22	3264143	陈荣军	男	47Y	创伤性硬膜外血肿	颅内感染;颅内静脉窦血栓形成;短暂性脑缺血发作;顶骨骨折;肝囊肿;肾结石;前列腺增生;肺气肿	好转	潘陈为	方佩佩2	林秀珍	腰椎穿刺
27	C10感染内科	2022-08-19	2022-09-05	3269343	王阿翠	女	86Y	脓毒血症	心功能不全;高血压性心脏病;肾衰竭;多发性肋骨骨折;动脉粥样硬化;下肢静脉血栓形成;2型糖尿病;胆囊结石;后天性肾囊肿;神经官能症	好转	诸葛璐	李杰	吴佐罗
28	C11肾内科	2022-02-16	2022-03-08	3200442	张树令	女	86Y	慢性肾脏病5期	双眼白内障;下肢静脉血栓形成;下肢动脉粥样硬化;颈动脉硬化;肋骨骨折;骨质疏松;肝硬化失代偿期;轻度贫血;肾性高血压;2型糖尿病性肾病	好转	赵艳玲	陈辉乐	徐晓燕2
29	C11肾内科	2022-03-02	2022-03-23	3206223	陈益女	女	79Y	类风湿性关节炎	间质性肺病;肺部感染;骨质疏松;脂肪肝;肝囊肿;后天性肾囊肿;陈旧性肋骨骨折;动脉粥样硬化;静脉栓塞和血栓形成;双眼白内障;黄斑玻璃样疣	好转	周志宏	张益前	金怡
30	C11肾内科	2022-02-22	2022-03-29	3208179	叶花妹	女	71Y	肾病综合征	肾衰竭;胸椎骨折;胸椎退行性病变;腰椎退行性病变;消化道出血;下肢静脉血栓形成;高血压病;骨质疏松;肾结石;颈动脉硬化;下肢动脉粥样硬化;糜烂性胃炎	好转	赵艳玲	陈辉乐	徐晓燕2	胸椎骨折球囊扩张成形术
31	C11肾内科	2022-03-28	2022-04-10	3212205	张树令	女	86Y	2型糖尿病性肾病	血液透析;高血压性心脏病;颈动脉硬化;下肢动脉粥样硬化;肝硬化失代偿期;后天性肾囊肿;肾结石;轻度贫血;双眼白内障;肋骨骨折;腹水;骨质疏松;肺部感染;胸腔积液;下肢静脉血栓形成;肾性高血压;肺结节	好转	毛朝鸣	叶菡洋	黄文
32	C11肾内科	2022-07-18	2022-07-23	3251850	叶花妹	女	71Y	肾病综合征	慢性肾衰竭;急性肾衰竭;心功能不全;感染性休克;肺部感染;泌尿道感染;高血压病;骨质疏松;颈动脉硬化;下肢动脉粥样硬化;下肢静脉血栓形成;骨折治疗后恢复期;胸椎退行性病变;腰椎退行性病变;糜烂性胃炎;肾结石;老年性脑萎缩;脑梗死后遗症	未愈	毛朝鸣	王红	金怡
33	C11肾内科	2022-07-20	2022-07-25	3252362	麻林菊	女	61Y	骨质疏松	高血压病;乙型病毒性肝炎;特指手术后状态;骨折治疗后恢复期;脊柱侧弯;脊椎退行性病变;亚临床甲状腺功能亢进症;肾结石;后天性肾囊肿;胆囊结石;下肢静脉血栓形成;脂肪肝;高血压性心脏病	好转	毛朝鸣	王红	金怡
34	D06(ICU)	2021-12-28	2022-01-13	3182351	杨贤良	男	81Y	慢性阻塞性肺病伴急性加重	呼吸衰竭;肺部感染;消化道出血;股骨粗隆间骨折;陈旧性肋骨骨折;胸椎骨折;下肢深静脉血栓形成;脑梗死个人史;高血压性肾衰竭	未愈	龚裕强	龚裕强	谢媚媚
35	D06(ICU)	2022-01-03	2022-01-15	3182862	林华敏	男	54Y	创伤性硬膜下出血	创伤性蛛网膜下腔出血;肺部感染;肝功能不全;脑挫伤;下肢动脉粥样硬化;继发性血小板增多症;大手术个人史;腰椎骨折;骶骨骨折;高脂血症;肾结石;后天性肾囊肿;前列腺钙化灶;下肢深静脉血栓形成	好转	程碧环	王本极	王本极	有创呼吸机治疗小于96小时
36	D06(ICU)	2022-01-21	2022-01-23	3186043	徐杨柳	女	54Y	结肠损伤	急性坏死性肠炎;脓毒血症;腹水;感染性休克;急性化脓性阑尾炎;腓骨骨折;尿毒症;闭合性胫骨平台骨折;不完全性肠梗阻;2型糖尿病;髂静脉血栓形成;股静脉血栓形成;下肢深静脉血栓形成	未愈	龚裕强	戴凌燕	傅蓓蓓	肠粘连松解术;小肠造口术;右半结肠切除术;血液净化;有创呼吸机治疗小于96小时;腹部冲洗引流术
37	D06(ICU)	2022-07-12	2022-07-19	3250208	徐克进	男	101Y	肺部感染	2型糖尿病;癫痫;高血压病;多发性脑梗死;低蛋白血症;下肢动脉粥样硬化;下肢静脉血栓形成;颈动脉硬化;锁骨下动脉粥样硬化;特指手术后状态;陈旧性股骨骨折	好转	龚裕强	程碧环	张文武
38	D07儿童骨科、骨盆外科	2022-01-11	2022-01-23	3185393	李彩媄	女	70Y	股骨粗隆间骨折	糖尿病;特指手术后状态;呼吸道结核;下肢动脉粥样硬化;下肢静脉血栓形成	治愈	孔建中	孔建中	陈墨川	股骨骨折闭合复位钢针内固定术
39	D07儿童骨科、骨盆外科	2022-01-11	2022-01-25	3186259	曾爱莲	女	73Y	股骨粗隆间骨折	慢性胃炎;泌尿道感染;糖尿病;下肢静脉血栓形成;糜烂性胃炎;脑梗死后遗症;脂肪肝;后天性肾囊肿;高血压病	治愈	孔建中	孔建中	陈墨川	股骨骨折闭合复位钢针内固定术
40	D07儿童骨科、骨盆外科	2022-02-02	2022-02-06	3190691	董自富	男	54Y	股骨颈骨折	下肢静脉血栓形成;脂肪肝;后天性肾囊肿;肝囊肿	治愈	孔建中	孔建中	陈墨川	股骨骨折闭合复位钢针内固定术
41	D07儿童骨科、骨盆外科	2022-01-24	2022-02-09	3191955	鲁珍掀	男	54Y	股骨粗隆下骨折	脂肪肝;骰骨骨折;跖趾关节脱位;三踝骨折;跖骨骨折;腰椎骨折;中度贫血;下肢静脉血栓形成	治愈	孔建中	孔建中	陈墨川	踝关节骨折切开复位钢针内固定术;股骨骨折闭合复位钢针内固定术;跗跖关节融合术
42	D07儿童骨科、骨盆外科	2022-02-10	2022-02-26	3196889	吕秋莲	女	65Y	闭合性胫骨平台骨折	多发性肋骨骨折;液气胸;胸腔积液;下肢动脉粥样硬化;静脉栓塞和血栓形成;原发性单侧膝关节病;脂肪肝;肝和胆道影像检查异常;尺骨桡骨闭合性骨折;腓骨骨折;耻骨骨折;骨质疏松	治愈	翁益民	翁益民	王特	胫骨骨折切开复位钢板内固定术;尺骨骨折切开复位钢板内固定术;桡骨骨折切开复位钢板内固定术;胫骨植骨术
43	D07儿童骨科、骨盆外科	2022-03-06	2022-03-15	3202983	林宪华	女	66Y	胫骨骨折累及踝关节	小腿开放性损伤;2型糖尿病;下肢动脉粥样硬化;下肢静脉血栓形成	治愈	翁益民	翁益民	王特	踝关节骨折切开复位钢板内固定术;胫骨植骨术;胫骨骨折切开复位钢板内固定术
44	D07儿童骨科、骨盆外科	2022-03-06	2022-03-16	3203573	蔡娇妹	女	92Y	股骨粗隆间骨折	高血压病;2型糖尿病;下肢动脉粥样硬化;下肢动脉血栓形成;后天性肾囊肿;完全性右束支传导阻滞;肺栓塞;冠状动脉粥样硬化性心脏病	治愈	翁益民	翁益民	王特	股骨骨折闭合复位钢针内固定术
45	D07儿童骨科、骨盆外科	2022-03-09	2022-03-20	3204705	钱飞鹏	男	66Y	开放性足损伤	开放性特指趾骨骨折;下肢静脉血栓形成;肝囊肿;后天性肾囊肿	治愈	孔建中	孔建中	陈墨川	创面负压封闭引流[VSD];皮肤和皮下坏死组织切除清创术
46	D07儿童骨科、骨盆外科	2022-02-26	2022-03-23	3205962	彭玉西	男	51Y	开放性胫腓骨下端骨折	跟骨骨折;肝囊肿;下肢动脉粥样硬化;下肢静脉血栓形成	治愈	孔建中	孔建中	陈墨川	胫骨骨折切开复位钢板内固定术;腓骨骨折切开复位钢板内固定术;关节软骨修复术;胫骨植骨术;跟骨结节牵引
47	D07儿童骨科、骨盆外科	2022-03-15	2022-03-27	3207089	项纯萍	女	82Y	股骨粗隆间骨折	高血压病;2型糖尿病;脂肪肝;肾超声检查异常;特指肾盂积水;下肢特指深部脉管静脉炎和血栓性静脉炎	治愈	孔建中	陈墨川	陈墨川	股骨骨折闭合复位钢针内固定术
48	D07儿童骨科、骨盆外科	2022-03-27	2022-04-02	3209527	邵玉兰	女	77Y	股骨粗隆间骨折	退行性主动脉瓣疾患;下肢静脉血栓形成;2型糖尿病;高血压病	治愈	孔建中	陈墨川	方文来	股骨骨折闭合复位钢针内固定术
49	D07儿童骨科、骨盆外科	2022-04-12	2022-04-15	3214112	胡六英	女	52Y	内踝骨折	肱骨上端骨折;桡骨下端骨折;下肢动脉粥样硬化;下肢静脉血栓形成;肝囊肿;肾结石	治愈	孔建中	陈墨川	方文来	关节软骨修复术;踝关节骨折切开复位钢针内固定术
50	D07儿童骨科、骨盆外科	2022-04-03	2022-04-16	3214349	陈余平	女	61Y	股骨粗隆间骨折	脂肪肝;下肢静脉血栓形成;下肢动脉粥样硬化;高血压病;特指手术后状态	好转	翁益民	翁益民	王特	股骨骨折闭合复位钢针内固定术
51	D07儿童骨科、骨盆外科	2022-04-18	2022-04-23	3217195	肖崇昌	男	90Y	股骨颈骨折	前列腺增生;胸腔积液;肺气肿;下肢静脉血栓形成;下肢动脉粥样硬化;完全性右束支传导阻滞;后天性肾囊肿	好转	孔建中	陈墨川	方文来	人工股骨头置换术
52	D07儿童骨科、骨盆外科	2022-04-17	2022-04-28	3219076	闵长久	男	50Y	三踝骨折	下肢静脉血栓形成	治愈	孔建中	陈墨川	方文来	踝关节骨折切开复位钢针内固定术
53	D07儿童骨科、骨盆外科	2022-01-21	2022-05-11	3223544	吴则华	男	61Y	开放性胫腓骨干骨折	脂肪肝;下肢静脉血栓形成;股骨髁骨折;下肢动脉粥样硬化;小腿水平腓神经损伤;开放性髌骨骨折;高血压病;房性早搏;室性早搏;多处挫伤;前列腺结石	好转	孔建中	陈墨川	陈墨川	股骨骨折切开复位钢板内固定术;游离皮瓣移植术;创面负压封闭引流[VSD];皮肤和皮下坏死组织切除清创术;胫骨骨折切开复位钢板内固定术;股骨病损切除术
54	D07儿童骨科、骨盆外科	2022-04-24	2022-05-16	3225210	吴志爱	女	75Y	肱骨上端骨折	肩胛骨骨折;脂肪肝;下肢静脉血栓形成;胆囊胆固醇沉着症;心房颤动;闭合性胫骨平台骨折;高血压病;冠状动脉支架植入后状态	好转	翁益民	翁益民	王特	胫骨骨折切开复位钢板内固定术;关节软骨修复术;下腔静脉滤器置入术;肱骨骨折切开复位钢板内固定术
55	D07儿童骨科、骨盆外科	2022-05-04	2022-05-17	3225713	李阿翠	女	57Y	双踝骨折	后天性肾囊肿;肾结石;跖骨骨折;下肢静脉血栓形成;闭合性胫骨平台骨折	好转	孔建中	陈墨川	方文来	关节软骨修复术;跟骨人工骨植骨术;踝关节骨折切开复位钢板内固定术
56	D07儿童骨科、骨盆外科	2022-05-09	2022-05-18	3226224	陈龙波	男	69Y	股骨干骨折	后天性肾囊肿;下肢静脉血栓形成;多发性肋骨骨折;2型糖尿病;肾结石	好转	孔建中	陈墨川	方文来	股骨骨折闭合复位髓内针内固定术;股静脉穿刺术;下腔静脉滤器置入术
57	D07儿童骨科、骨盆外科	2022-05-09	2022-05-19	3226469	黄孝悌	男	89Y	胫腓骨干骨折	下肢动脉粥样硬化;高血压病;下肢静脉血栓形成;皮肤挫伤;心动过速;肾积水伴肾结石	好转	孔建中	陈墨川	方文来	胫骨骨折切开复位钢板内固定术
58	D07儿童骨科、骨盆外科	2022-07-02	2022-07-09	3245693	谢王玲	女	54Y	跖骨骨折	下肢静脉血栓形成;多发性肋骨骨折	好转	孔建中	陈墨川	方文来	跖骨骨折切开复位钢板内固定术
59	D07儿童骨科、骨盆外科	2022-06-27	2022-07-12	3247349	李余波	男	65Y	股骨干骨折	低蛋白血症;胸腔积液;特指肾上腺皮质功能减退症和肾上腺皮质功能减退症;下肢静脉血栓形成;轻度贫血;脂肪肝;后天性肾囊肿;特指类风湿性关节炎;膝关节病理性不全脱位;肺部感染	治愈	孔建中	陈墨川	方文来	股骨人工骨植骨术;股骨骨折切开复位钢板内固定术
60	D07儿童骨科、骨盆外科	2022-07-28	2022-08-07	3257871	金美菊	女	61Y	髌骨骨折	外踝骨折;骨质疏松;后天性肾囊肿;下肢静脉血栓形成	治愈	翁益民	翁益民	项光恒	关节软骨修复术;髌骨骨折切开复位张力带钢丝内固定术
61	D07儿童骨科、骨盆外科	2022-06-28	2022-08-08	3258385	陈必忠	男	42Y	腰椎骨折	骶骨骨折;耻骨骨折;下肢静脉血栓形成;跟骨骨折;多发性肋骨骨折;肺挫伤;后天性肾囊肿;肺结节;髋臼骨折	好转	孔建中	陈墨川	方文来	髋骨骨折切开复位钢板内固定术;髂内动脉栓塞术;皮肤和皮下坏死组织切除清创术;脊椎骨折复位术;椎弓根钉内固定术
62	D07儿童骨科、骨盆外科	2022-08-24	2022-09-06	3269889	陈崇月	男	47Y	胫骨上端骨折	下肢静脉血栓形成;脂肪肝;前列腺增生	好转	孔建中	陈墨川	方文来	股骨人工骨植骨术;股骨截骨术;胫骨植骨术;关节软骨修复术;胫骨骨折切开复位钢板内固定术
63	D07儿童骨科、骨盆外科	2022-09-09	2022-09-15	3273319	吴剑烽	男	34Y	胫骨上端骨折	开放性膝部损伤;下肢静脉血栓形成	好转	孔建中	陈墨川	方文来	胫骨人工骨植骨术;关节软骨修复术;胫骨骨折切开复位钢板内固定术
64	D07儿童骨科、骨盆外科	2022-08-25	2022-09-20	3275200	朱建勇	男	52Y	股骨下端骨折	髌骨骨折;下肢特指深部脉管静脉炎和血栓性静脉炎;肺气肿;脂肪肝	好转	孔建中	陈墨川	方文来	关节软骨修复术;髌骨骨折切开复位张力带钢丝内固定术;股骨人工骨植骨术;股骨骨折切开复位钢板内固定术
65	D07儿童骨科、骨盆外科	2022-09-15	2022-10-07	3281050	沈春妹	女	56Y	闭合性胫骨平台骨折	脂肪肝;双踝骨折;下肢静脉曲张;下肢静脉血栓形成	好转	孔建中	陈墨川	方文来	胫骨骨折切开复位钢板内固定术;踝关节骨折切开复位钢板内固定术
66	D07儿童骨科、骨盆外科	2022-09-26	2022-10-09	3281467	缪顺莲	女	80Y	股骨颈骨折	肺结节;胸腔积液;高血压病;下肢静脉血栓形成;肺部感染;腔隙性脑梗死;老年性脑萎缩;脂肪肝;后天性肾囊肿	好转	孔建中	陈墨川	方文来	陶瓷-聚乙烯髋关节置换;全髋关节置换术
67	D07儿童骨科、骨盆外科	2022-09-30	2022-10-16	3284244	李培众	男	82Y	股骨髁骨折	肝病;胆囊结石;前列腺增生;下肢静脉血栓形成;髌骨骨折;开放性膝部损伤	好转	孔建中	陈墨川	方文来	髌骨骨折切开复位张力带钢丝内固定术;股骨骨折切开复位钢板内固定术;创面负压封闭引流[VSD];关节软骨修复术
68	D07儿童骨科、骨盆外科	2022-10-03	2022-10-17	3284706	叶秋霞	女	60Y	闭合性胫骨平台骨折	胆囊息肉;动脉粥样硬化;下肢静脉血栓形成	治愈	翁益民	翁益民	项光恒	下腔静脉滤器置入术;胫骨骨折切开复位钢板内固定术
69	D07儿童骨科、骨盆外科	2022-10-07	2022-10-17	3284757	林仁汉	男	74Y	股骨粗隆下骨折	下肢静脉血栓形成;后天性肾囊肿;肝病	好转	孔建中	陈墨川	方文来	股骨骨折切开复位髓内针内固定术
70	D07儿童骨科、骨盆外科	2022-10-12	2022-10-20	3285865	林洪国	男	80Y	股骨粗隆间骨折	后天性肾囊肿;前列腺增生;下肢动脉粥样硬化;下肢静脉血栓形成	好转	翁益民	翁益民	项光恒	股骨骨折闭合复位髓内针内固定术
71	D07儿童骨科、骨盆外科	2022-10-26	2022-11-06	3292692	朱善海	男	75Y	股骨颈骨折	高血压病;肺恶性肿瘤;前列腺增生;前列腺结石;下肢静脉血栓形成;慢性阻塞性肺病	治愈	孔建中	陈墨川	方文来	人工双动股骨头置换术
72	D07儿童骨科、骨盆外科	2022-10-24	2022-11-07	3293091	高小珍	女	69Y	股骨颈骨折	后天性肾囊肿;下肢静脉血栓形成	治愈	翁益民	翁益民	项光恒	陶瓷-陶瓷髋关节置换;全髋关节置换术
73	D07儿童骨科、骨盆外科	2022-10-31	2022-11-09	3293741	李香凤	女	79Y	股骨颈骨折	肺结节;高血压Ⅲ期;冠状动脉粥样硬化性心脏病;肾结石;肺气肿;下肢静脉血栓形成;褥疮	好转	孔建中	陈墨川	方文来	人工双动股骨头置换术
74	D07儿童骨科、骨盆外科	2022-11-01	2022-11-16	3296579	范丽霞	女	66Y	闭合性胫骨平台骨折	膝关节脱位;下肢静脉血栓形成;脂肪肝	好转	孔建中	陈墨川	方文来	膝关节脱位切开复位术;胫骨骨折切开复位钢板内固定术
75	D07儿童骨科、骨盆外科	2022-11-15	2022-11-24	3299686	何玉英	女	80Y	股骨粗隆间骨折	下肢静脉血栓形成;脂肪肝;肾结石	好转	孔建中	陈墨川	方文来	股骨骨折闭合复位髓内针内固定术
76	D07儿童骨科、骨盆外科	2022-10-31	2022-11-30	3302210	洪利坚	女	66Y	开放性胫腓骨下端骨折	胆囊息肉;后天性肾囊肿;肾结石;坏疽;高血压病;静脉栓塞和血栓形成;肝囊肿	好转	孔建中	陈墨川	方文来	创面负压封闭引流[VSD];腓骨骨折切开复位术;胫骨骨折切开复位术;腓骨开放性骨折清创术;胫骨开放性骨折清创术;踝关节骨折切开复位螺钉内固定术;腓骨骨折切开复位钢板内固定术;胫骨骨折切开复位钢板内固定术
77	D07儿童骨科、骨盆外科	2022-11-19	2022-12-04	3303548	李秀凤	女	83Y	股骨颈骨折	胆囊病变;后天性肾囊肿;带状疱疹;下肢静脉血栓形成	治愈	翁益民	翁益民	项光恒	人工双动股骨头置换术
78	D07儿童骨科、骨盆外科	2022-11-30	2022-12-12	3306628	蔡春兰	女	56Y	三踝骨折	下肢静脉血栓形成	好转	孔建中	陈墨川	方文来	腓骨人工骨植骨术;关节软骨修复术;踝关节骨折切开复位钢板内固定术
79	D07儿童骨科、骨盆外科	2022-12-11	2022-12-19	3309431	舒秀花	女	53Y	髌骨骨折	膝挫伤;下肢静脉血栓形成	好转	孔建中	陈墨川	方文来	关节软骨修复术;髌韧带缝合术;髌骨骨折切开复位张力带钢丝内固定术
80	D07儿童骨科、骨盆外科	2022-12-18	2022-12-28	3313078	李阿英	女	81Y	胫骨上端骨折	高血压病;2型糖尿病;下肢静脉血栓形成;肾衰竭;脂肪肝;肾结石;肺结节	好转	孔建中	陈墨川	方文来
81	D08(骨病)	2021-12-27	2022-01-02	3178287	夏美花	女	93Y	股骨粗隆间骨折	高血压病;胆囊切除术后状态;下肢动脉粥样硬化;肾钙化;脂肪肝;后天性肾囊肿;股动脉血栓形成	治愈	翁益民	翁益民	王特
82	D08(骨病)	2022-01-05	2022-01-17	3183466	周冬妹	男	84Y	股骨粗隆间骨折	骨质疏松;下肢静脉血栓形成;腹股沟疝	治愈	张宇	陈成旺	张学磊	股骨骨折闭合复位钢针内固定术
83	D08(骨病)	2022-01-12	2022-01-22	3185014	蔡爱玉	女	81Y	股骨颈骨折	下肢动脉血栓形成;高血压病	治愈	张宇	陈成旺	林一木	人工股骨头置换术
84	D08(骨病)	2022-01-22	2022-01-27	3187018	江爱梅	女	83Y	胸椎骨折	高血压病;骨质疏松;下肢静脉血栓形成;下肢动脉粥样硬化	治愈	毛方敏	田乃锋	田乃锋	胸椎骨折球囊扩张成形术
85	D08(骨病)	2022-01-18	2022-01-29	3187569	陈顺翠	女	63Y	半月板撕裂，近期的	下肢静脉血栓形成;后天性肾囊肿;膝关节副韧带扭伤;膝关节十字韧带扭伤;闭合性胫骨平台骨折;下肢动脉粥样硬化	治愈	胡月正	胡月正	许心弦	副韧带修补术;膝关节镜下前十字韧带重建术;膝关节滑膜切除术
86	D08(骨病)	2022-02-02	2022-02-09	3191949	林永珠	女	67Y	闭合性胫骨平台骨折	膝外侧半月板损伤;膝关节副韧带扭伤;膝关节病;下肢静脉血栓形成;尾骨骨折;高血压病	治愈	胡月正	胡月正	许心弦	副韧带修补术;膝关节镜下滑膜切除术;膝关节镜下半月板部分切除术
87	D08(骨病)	2022-02-23	2022-03-06	3199823	叶绍凤	女	72Y	肱骨上端骨折	下肢静脉血栓形成;2型糖尿病;肺纤维化;肝囊肿;下肢动脉粥样硬化;高血压病	治愈	胡月正	余华晨	柳海晓	肱骨骨折切开复位钢针内固定术
88	D08(骨病)	2022-02-24	2022-03-19	3204527	管嗣录	男	83Y	膝关节十字韧带扭伤	多发性肋骨骨折;前列腺结石;下肢静脉血栓形成;下肢动脉粥样硬化;高血压病;2型糖尿病;脂肪肝;肾结石;后天性肾囊肿;腺性膀胱炎;前列腺增生	治愈	张宇	陈成旺	林一木	下腔静脉滤器置入术;全膝关节表面置换术;股静脉穿刺术
89	D08(骨病)	2022-03-13	2022-03-23	3206084	王阿珠	女	88Y	股骨颈骨折	痛风;下肢动脉粥样硬化;肾结石;下肢静脉血栓形成	治愈	张宇	陈成旺	张学磊	人工股骨头置换术
90	D08(骨病)	2022-03-12	2022-03-26	3207122	池丽蓉	女	59Y	髌骨骨折	头皮血肿;下肢静脉血栓形成;脂肪肝	治愈	翁益民	翁益民	王特	髌骨骨折切开复位螺钉内固定术
91	D08(骨病)	2022-04-06	2022-04-17	3214767	蔡侠龙	男	65Y	髌骨骨折	膝关节病;下肢动脉粥样硬化;胸膜钙化;下肢静脉血栓形成;前列腺结石	治愈	张宇	陈成旺	许心弦	髌骨骨折切开复位螺钉内固定术
92	D08(骨病)	2022-04-18	2022-04-24	3217373	苏晓晞	女	80Y	股骨颈骨折	下肢动脉粥样硬化;冠状动脉粥样硬化;主动脉钙化;下肢静脉血栓形成;胸腔积液;脂肪肝;胆囊炎;肾结石;胆囊结石	治愈	张宇	陈成旺	许心弦	人工股骨头置换术;下腔静脉滤器置入术;下肢静脉造影
93	D08(骨病)	2022-06-04	2022-06-11	3234918	詹丽姿	女	66Y	膝关节副韧带扭伤	半月板撕裂，近期的;下肢动脉粥样硬化;高血压病;下肢静脉血栓形成;股骨髁骨折	治愈	薛恩兴	薛恩兴	许心弦	副韧带修补术;股骨骨折切开复位螺钉内固定术
94	D08(骨病)	2022-07-27	2022-07-30	3254625	南凤香	女	89Y	股骨粗隆间骨折	下肢动脉硬化闭塞症;下肢静脉血栓形成;下肢动脉粥样硬化;膀胱憩室;高血压病;2型糖尿病;后天性肾囊肿	好转	薛恩兴	张宇	李振兴
95	D08(骨病)	2022-08-24	2022-09-12	3272041	姜永田	男	71Y	胫骨上端骨折	下肢动脉粥样硬化;下肢静脉血栓形成;胆囊息肉;后天性肾囊肿;主动脉扩张;室间隔肥大;二尖瓣及主动脉瓣关闭不全;颈椎关节强硬;多发性膝关节损伤;颈椎间盘突出	治愈	薛恩兴	陈成旺	陈德横	胫骨骨折切开复位钢板内固定术
96	D08(骨病)	2022-09-19	2022-09-27	3277622	徐寿蕊	女	83Y	髌骨骨折	高血压病;脂肪肝;下肢动脉粥样硬化;静脉栓塞和血栓形成	治愈	张宇	陈成旺	陈德横	髌骨骨折切开复位张力带钢丝内固定术
97	D08(骨病)	2022-10-06	2022-10-16	3284298	陈良焱	男	37Y	陈旧性前十字韧带损伤	陈旧性胫骨骨折;下肢静脉血栓形成	治愈	胡月正	柳海晓	徐道亮	膝关节镜下前十字韧带重建术
98	D08(骨病)	2022-12-15	2022-12-25	3311679	朱岳滔	男	74Y	股骨颈骨折	高血压病;2型糖尿病;帕金森病;动脉粥样硬化;下肢静脉血栓形成;心房颤动	治愈	张宇	陈成旺	林一木	人工双动股骨头置换术
99	D09(创伤1)	2021-12-29	2022-01-02	3178397	王永斋	男	93Y	骨折治疗后恢复期	前列腺增生;左房扩大;下肢动脉粥样硬化;肝钙化灶;后天性肾囊肿;前列腺结石;肝回声不均;静脉栓塞和血栓形成	其他	杨雷	周一飞	张月雷
100	D09(创伤1)	2022-01-06	2022-01-15	3182773	王进良	男	86Y	股骨粗隆间骨折	阿尔茨海默病;高血压病;下肢动脉粥样硬化;胆总管扩张;腘窝囊肿;肝钙化灶;静脉栓塞和血栓形成	治愈	陈龙	陈龙	应晓洲	股骨骨折闭合复位髓内针内固定术
101	D09(创伤1)	2021-12-29	2022-01-22	3184909	柳齐扬	男	72Y	原发性单侧膝关节病	静脉栓塞和血栓形成;下肢特指深部脉管静脉炎和血栓性静脉炎;肝硬化;骨折不连接;前列腺增生;前列腺结石;脾大	治愈	杨雷	周一飞	张月雷	膝关节双间室置换术
102	D09(创伤1)	2021-12-25	2022-01-23	3185623	杨伯云	男	76Y	髋臼骨折	大隐静脉曲张;下肢静脉血栓形成;髂骨骨折;坐骨骨折;创伤性血气胸;后天性肾囊肿;头皮血肿;特指手术后状态;下肢动脉栓塞和血栓形成;多发性肋骨骨折;创伤性胸腔积液;肺部感染;失血性休克;急性肾衰竭;下肢动脉粥样硬化	治愈	陈龙	陈龙	应晓洲	皮肤和皮下组织切开异物取出术;髋骨骨折切开复位钢板内固定术;髂动脉栓塞术
103	D09(创伤1)	2022-01-15	2022-01-30	3187783	杨成必	男	64Y	股骨粗隆间骨折	下肢静脉血栓形成;下肢动脉硬化闭塞症	治愈	汤骏	汤骏	吴剑彬	股骨骨折闭合复位螺钉内固定术
104	D09(创伤1)	2022-01-29	2022-01-31	3188486	周金妹	女	78Y	肱骨上端骨折	股骨粗隆间骨折;下肢动脉硬化闭塞症;下肢静脉血栓形成	好转	汤骏	吴剑彬	吴剑彬
105	D09(创伤1)	2022-02-09	2022-02-12	3193356	陈顺法	男	79Y	股骨颈骨折	人工髋关节;下肢特指深部脉管静脉炎和血栓性静脉炎	好转	杨雷	周一飞	张月雷
106	D09(创伤1)	2022-01-23	2022-02-13	3193781	柳良春	男	44Y	开放性股骨干骨折	头皮血肿;脊柱骨折;静脉栓塞和血栓形成	治愈	杨雷	周一飞	张月雷	皮肤和皮下组织非切除性清创;胫骨结节牵引;股骨骨折闭合复位钢针内固定术
107	D09(创伤1)	2022-02-07	2022-02-14	3194033	潘锦表	男	86Y	股骨粗隆间骨折	下肢动脉粥样硬化;静脉栓塞和血栓形成;后天性肾囊肿;前列腺增生;肺部阴影;前列腺结石	治愈	陈龙	陈龙	应晓洲	股骨骨折闭合复位髓内针内固定术
108	D09(创伤1)	2022-02-11	2022-02-28	3197440	吴春芽	女	81Y	股骨颈骨折	高血压病;后天性肾囊肿;肾结石;下肢静脉血栓形成;肺部阴影	治愈	陈龙	陈龙	应晓洲	人工股骨头置换术
109	D09(创伤1)	2022-02-27	2022-03-01	3198054	季二妹	女	87Y	股骨颈骨折	下肢静脉血栓形成;胆囊结石;膀胱憩室	好转	汤骏	吴剑彬	吴剑彬
110	D09(创伤1)	2022-02-18	2022-03-06	3199669	徐夏春	女	81Y	股骨颈骨折	胃溃疡;多发性脑梗死;下肢动脉粥样硬化;下肢静脉血栓形成;颈动脉硬化;脱髓鞘性脑病;老年性脑萎缩;肾结石;下肢静脉狭窄;下肢静脉曲张;冠状动脉粥样硬化性心脏病;高血压病	治愈	赵友明	赵友明	柯陈荣	人工股骨头置换术
111	D09(创伤1)	2022-02-03	2022-03-06	3199901	徐玉双	女	66Y	尺骨桡骨闭合性骨折	骨盆骨折;失血性休克;开放性甲状腺损伤;髋臼骨折;多发性肋骨骨折;头皮血肿;腰椎骨折;下肢动脉粥样硬化;下肢静脉血栓形成;下肢动脉硬化闭塞症	治愈	陈龙	陈龙	应晓洲	单侧甲状腺部分切除术;髋骨骨折切开复位钢针内固定术;骨盆骨折闭合复位术;桡骨骨折切开复位钢板内固定术;有创呼吸机治疗小于96小时;髂动脉栓塞术;伤口止血术
112	D09(创伤1)	2022-02-15	2022-03-07	3200048	张爱芳	女	90Y	股骨颈骨折	高血压病;直肠肿物;下肢动脉粥样硬化;肺结节;后天性肾囊肿;肺恶性肿瘤;下肢静脉血栓形成	治愈	陈龙	陈龙	应晓洲	人工股骨头置换术
113	D09(创伤1)	2022-01-27	2022-03-08	3200565	陈美云	女	45Y	髂骨骨折	慢性乙型病毒性肝炎;髋臼骨折;骶骨骨折;耻骨骨折;腰骶部脊髓神经丛损伤;股动脉血栓形成;腰椎骨折;下肢开放性伤口;下肢静脉血栓形成;头皮血肿;盆腔积液，女性	治愈	陈龙	陈龙	应晓洲	髂动脉栓塞术;髂骨骨折切开复位钢板内固定术;下肢动脉造影;经皮髂动脉取栓术;经皮股动脉取栓术;髋骨骨折切开复位钢针内固定术
114	D09(创伤1)	2022-02-27	2022-03-14	3202566	陈洁	男	33Y	跟骨骨折	腰椎骨折;跖骨骨折;脂肪肝;前列腺结石;下肢静脉血栓形成	治愈	赵友明	赵友明	柯陈荣	跖骨骨折切开复位钢针内固定术;跟骨骨折切开复位钢针内固定术
115	D09(创伤1)	2022-03-12	2022-03-22	3205426	李竹弟	女	70Y	股骨干骨折	脂肪肝;肝囊肿;下肢静脉血栓形成	治愈	杨雷	周一飞	张月雷	股骨骨折切开复位钢板内固定术
116	D09(创伤1)	2022-03-18	2022-03-22	3205721	王祝川	男	90Y	股骨粗隆间骨折	高血压病;帕金森病;特指含硅[矽]粉尘肺尘埃沉着病;乙型肝炎小三阳;下肢静脉血栓形成;脂肪肝;后天性肾囊肿;慢性支气管炎;躯干皮肤和皮下组织良性脂肪瘤样肿瘤;室性早搏;下肢动脉硬化闭塞症;肺气肿	好转	陈龙	陈龙	应晓洲
117	D09(创伤1)	2022-03-16	2022-03-24	3206556	邵友妹	女	70Y	髌骨骨折	下肢动脉硬化闭塞症;肺部感染;肺结节;下肢静脉血栓形成	治愈	陈龙	陈龙	应晓洲	髌韧带重建术;髌骨骨折切开复位张力带钢丝内固定术
118	D09(创伤1)	2022-03-28	2022-04-04	3210237	黄连香	女	78Y	股骨颈骨折	肝钙化灶;下肢静脉血栓形成;后天性肾囊肿;高血压病;下肢动脉粥样硬化	治愈	杨雷	吴剑彬	吴剑彬	全髋关节置换术
119	D09(创伤1)	2022-04-13	2022-04-26	3218276	郑邦启	男	67Y	肱骨上端骨折	2型糖尿病;下肢静脉血栓形成;大腿血肿;下肢动脉粥样硬化;高血压病;后天性肾囊肿;头皮挫伤;头皮血肿	治愈	赵友明	赵友明	柯陈荣	肱骨骨折闭合复位钢针内固定术
120	D09(创伤1)	2022-04-23	2022-04-28	3219252	杨建凑	男	67Y	闭合性胫骨平台骨折	下肢动脉粥样硬化;肝回声不均;大隐静脉曲张;下肢静脉血栓形成	治愈	陈龙	陈龙	应晓洲	胫骨骨折切开复位钢针内固定术
121	D09(创伤1)	2022-04-17	2022-05-05	3221501	周成伍	男	72Y	跟骨骨折	下肢动脉粥样硬化;高血压病;下肢静脉血栓形成	治愈	杨雷	杨雷	张月雷	跟骨骨折切开复位钢针内固定术
122	D09(创伤1)	2022-04-26	2022-05-07	3221971	张松莲	女	64Y	股骨粗隆间骨折	下肢静脉血栓形成;肝囊肿	治愈	赵友明	赵友明	柯陈荣	股骨骨折闭合复位髓内针内固定术
123	D09(创伤1)	2022-05-07	2022-05-15	3225083	黄菊兰	女	50Y	闭合性胫骨平台骨折	膝关节副韧带扭伤;肘浅表损伤;肝钙化灶;下肢静脉血栓形成	治愈	赵友明	赵友明	柯陈荣	副韧带修补术;胫骨骨折切开复位钢针内固定术
124	D09(创伤1)	2022-05-21	2022-05-29	3230337	徐德铭	男	93Y	肱骨上端骨折	冠状动脉粥样硬化;肺部感染;下肢动脉粥样硬化;肾结石;高血压病;主动脉钙化;下肢静脉血栓形成;胰管扩张	治愈	杨雷	杨雷	张月雷	肱骨骨折切开复位钢针内固定术
125	D09(创伤1)	2022-06-01	2022-06-12	3235225	陈银媛	女	81Y	股骨髁骨折	特指手术后状态;乳腺恶性肿瘤;肺部感染;下肢静脉血栓形成;下肢动脉粥样硬化;原发性双侧髋关节病	治愈	陈龙	陈龙	应晓洲	股骨骨折闭合复位螺钉内固定术
126	D09(创伤1)	2022-06-07	2022-06-15	3236824	伍美柳	女	84Y	肱骨上端骨折	下肢静脉血栓形成;骨质疏松;老年性痴呆;耻骨骨折;下肢动脉硬化闭塞症;高血压病	治愈	杨雷	杨雷	周一飞	肱骨骨折切开复位钢板内固定术
127	D09(创伤1)	2022-06-10	2022-06-20	3238463	王冬春	男	44Y	胫骨骨干骨折	脂肪肝;下肢静脉血栓形成	好转	赵友明	赵友明	柯陈荣	胫骨骨折切开复位钢针内固定术;胫骨植骨术
128	D09(创伤1)	2022-06-12	2022-06-23	3239371	陈美玲	女	58Y	髌骨骨折	桡骨下端骨折;胆囊结石;下肢动脉粥样硬化;2型糖尿病;下肢静脉血栓形成	治愈	陈龙	陈龙	应晓洲	髌骨骨折切开复位螺钉内固定术;髌韧带缝合术
129	D09(创伤1)	2022-06-24	2022-07-17	3249036	陈联凤	男	66Y	闭合性胫骨平台骨折	下肢静脉血栓形成;纵隔疝;头部外伤;肺挫伤;多发性肋骨骨折	治愈	杨雷	周一飞	项光恒	胫骨骨折切开复位钢针内固定术;经胸膈疝修补术
130	D09(创伤1)	2022-08-09	2022-08-13	3260409	谢彩香	女	75Y	腰椎骨折	腰椎退行性病变;下肢动脉粥样硬化;下肢静脉血栓形成;创伤性脊柱侧弯	治愈	赵友明	赵友明	柯陈荣	腰椎骨折球囊扩张成形术
131	D09(创伤1)	2022-08-11	2022-08-21	3263388	沈潘澄	男	79Y	股骨粗隆间骨折	头部外伤;下肢动脉粥样硬化;下肢静脉血栓形成	治愈	汤骏	吴剑彬	吴剑彬	股骨骨折闭合复位髓内针内固定术
132	D09(创伤1)	2022-07-29	2022-08-26	3265409	温香妹	女	70Y	肱骨下端骨折	骨盆骨折;下肢静脉血栓形成;多发性腰椎骨折;创伤性蛛网膜下腔出血;肺挫伤;头皮血肿;皮肤挫伤;开放性舌部损伤;骶骨骨折;耻骨骨折;颈椎骨折;脑挫伤;肺部感染;脾损伤;头皮撕脱;胆总管扩张	治愈	汤骏	汤骏	吴剑彬	尺神经前移术;肱骨骨折切开复位钢针内固定术
133	D09(创伤1)	2022-08-21	2022-08-29	3266852	李升妹	女	86Y	股骨粗隆间骨折	心功能不全;高血压病;静脉栓塞和血栓形成;下肢动脉粥样硬化;心脏扩大;主动脉钙化;主动脉瓣关闭不全;退行性主动脉瓣疾患	治愈	陈龙	陈龙	应晓洲	股骨骨折切开复位髓内针内固定术
134	D09(创伤1)	2022-09-06	2022-09-10	3271400	刘伦昌	男	64Y	肩胛骨骨折	多发性肋骨骨折;肺气肿;创伤性胸腔积液;多处挫伤;下肢动脉粥样硬化;下肢静脉血栓形成	好转	赵友明	赵友明	柯陈荣
135	D09(创伤1)	2022-09-01	2022-09-11	3271530	蒋云琴	女	55Y	尺骨上端骨折	脂肪肝;下肢静脉血栓形成	治愈	赵友明	赵友明	柯陈荣	肘关节韧带修补术;关节软骨修复术;尺骨骨折切开复位钢针内固定术
136	D09(创伤1)	2022-09-12	2022-09-18	3274087	耿林美	女	59Y	髌骨骨折	下肢静脉血栓形成;胆囊息肉;后天性肾囊肿;下肢动脉硬化闭塞症	治愈	赵友明	赵友明	柯陈荣	关节软骨修复术;髌骨骨折切开复位螺钉内固定术
137	D09(创伤1)	2022-09-10	2022-09-25	3276793	郑珠妹	女	94Y	股骨粗隆间骨折	冠状动脉粥样硬化性心脏病;下肢静脉血栓形成;糖尿病;高血压病	治愈	杨雷	周一飞	218371	股骨骨折闭合复位髓内针内固定术
138	D09(创伤1)	2022-09-19	2022-09-26	3277335	蔡杨桃	女	72Y	桡骨下端骨折	贫血;下肢动脉粥样硬化;下肢静脉血栓形成;高血压病;糖尿病;慢性胃炎	治愈	汤骏	汤骏	吴剑彬	桡骨骨折切开复位钢板内固定术
139	D09(创伤1)	2022-09-18	2022-10-05	3280676	金春方	女	61Y	股骨颈骨折	下肢动脉粥样硬化;下肢静脉血栓形成;胆囊结石;肺占位性病变	治愈	赵友明	赵友明	柯陈荣	髋关节滑膜切除术;全髋关节置换术
140	D09(创伤1)	2022-10-12	2022-10-15	3284083	冯善茂	男	58Y	膝关节副韧带扭伤	胆囊病变;前列腺增生;前列腺结石;下肢静脉血栓形成;肱骨外髁骨折;原发性单侧膝关节病	治愈	赵友明	赵友明	柯陈荣	石膏绷带固定;副韧带修补术
141	D09(创伤1)	2022-10-15	2022-10-19	3285655	缪正林	男	59Y	腰椎骨折	腰椎退行性病变;腰椎间盘突出;创伤性胸腔积液;肝囊肿;下肢静脉血栓形成;椎管狭窄;肺挫伤	治愈	赵友明	赵友明	柯陈荣	腰椎骨折球囊扩张成形术
142	D09(创伤1)	2022-10-13	2022-10-22	3286874	刘碎娒	女	75Y	股骨粗隆间骨折	高血压病;糖尿病;脑梗死;肝囊肿;脂肪肝;下肢动脉粥样硬化;下肢静脉血栓形成	治愈	杨雷	周一飞	218371	股骨骨折闭合复位螺钉内固定术
143	D09(创伤1)	2022-10-19	2022-11-02	3291338	叶桂香	女	74Y	股骨颈骨折	胆囊息肉;老年性脑萎缩;高血压病;脑卒中后遗症;下肢静脉血栓形成;融合肾;高脂血症;腔隙性脑梗死	治愈	赵友明	赵友明	柯陈荣	全髋关节置换术
144	D09(创伤1)	2022-10-25	2022-11-05	3292332	陈爱娥	女	81Y	股骨粗隆间骨折	下肢静脉血栓形成;脂肪肝;后天性肾囊肿;肝回声不均	治愈	陈龙	陈龙	应晓洲	股骨骨折切开复位钢丝内固定术
145	D09(创伤1)	2022-11-01	2022-11-09	3293973	刘春叶	女	67Y	骨盆骨折	高血压病;髋臼骨折;耻骨骨折;腰椎间盘突出;髂骨骨折;下肢静脉血栓形成	治愈	陈龙	陈龙	应晓洲	骨盆骨折闭合复位术;骨盆外固定架固定术
146	D09(创伤1)	2022-11-08	2022-11-14	3295915	邹菊香	女	83Y	股骨粗隆间骨折	下肢静脉血栓形成;慢性乙型病毒性肝炎	治愈	陈龙	应晓洲	应晓洲	股骨骨折闭合复位髓内针内固定术
147	D09(创伤1)	2022-11-07	2022-11-14	3295984	朱林弟	女	76Y	股骨干骨折	高血压病;脂肪肝;下肢静脉血栓形成	治愈	杨雷	周一飞	218371	股骨骨折闭合复位螺钉内固定术
148	D09(创伤1)	2022-11-15	2022-11-24	3299759	王炳翠	女	83Y	股骨粗隆间骨折	骨质疏松;多发性肋骨骨折;创伤性心包积血;脱髓鞘性脑病;老年性脑萎缩;下肢静脉血栓形成	治愈	赵友明	赵友明	柯陈荣	股骨骨折切开复位钢板内固定术
149	D09(创伤1)	2022-11-28	2022-12-05	3304110	缪俊声	男	77Y	股骨颈骨折	2型糖尿病;下肢静脉血栓形成;胆囊结石;后天性肾囊肿	治愈	杨雷	周一飞	218371	全髋关节置换术
150	D09(创伤1)	2022-12-16	2022-12-26	3312206	杨梅香	女	69Y	骨盆骨折	静脉栓塞和血栓形成;多发性肋骨骨折;特指间质性肺病伴纤维化;冠状动脉粥样硬化;髂骨骨折;腕管综合征;脑梗死;肌腱和肌肉损伤;2型糖尿病;脱髓鞘病;脂肪肝	治愈	赵友明	余贤斌	柯陈荣	骨盆骨折切开复位螺钉内固定术
151	D09(创伤1)	2022-12-14	2022-12-29	3313197	董希银	男	65Y	股骨粗隆间骨折	腰椎骨折;下肢静脉血栓形成;高血压病	治愈	汤骏	吴剑彬	吴剑彬	股骨骨折切开复位钢针内固定术
152	D10(创伤2)	2021-12-27	2022-01-10	3180985	黄洪娒	女	88Y	股骨粗隆间骨折	高血压病;胸腔积液;脂肪肝;下肢静脉血栓形成;下肢动脉粥样硬化	治愈	陈华	孙辽军	卢迪	股骨骨折闭合复位术
153	D10(创伤2)	2021-12-28	2022-01-11	3181400	江水钗	女	93Y	皮肤恶性肿瘤	慢性骨髓炎;骨折治疗后恢复期;人工髋关节;肱骨上端骨折;肺结节;慢性支气管炎伴肺气肿;脊柱侧弯;下肢动脉粥样硬化;闭塞性周围动脉粥样硬化;下肢静脉血栓形成;胸腔积液;肾结石;原发性肺动脉高压;冠状动脉粥样硬化	好转	陈华	孙辽军	卢迪	经胫骨和腓骨的小腿离断术
154	D10(创伤2)	2022-01-15	2022-01-24	3185760	姚秀蓉	女	66Y	肱骨骨折	下肢静脉血栓形成;后天性肾囊肿;脂肪肝	好转	黄俊武	黄俊武	王鉴顺	肱骨骨折切开复位术
155	D10(创伤2)	2022-01-12	2022-01-24	3185789	施唐娒	男	67Y	髌骨骨折	肾积水伴肾结石;膝关节僵硬;下肢深静脉血栓形成;高血压病;脑卒中后遗症;肋骨骨折;下肢动脉粥样硬化;脂肪肝;肝囊肿	治愈	黄义星	黄义星	项光恒	下腔静脉滤器置入术;髌骨骨折切开复位术;股静脉穿刺术
156	D10(创伤2)	2022-01-25	2022-02-06	3190466	周林弟	女	84Y	股骨颈骨折	脂肪肝;肝内胆管结石;胆囊结石;肾结石;下肢动脉粥样硬化;下肢静脉血栓形成	治愈	石成弟	石成弟	张儒	人工股骨头置换术
157	D10(创伤2)	2022-02-08	2022-02-14	3194285	潘川进	女	90Y	股骨粗隆间骨折	后天性肾囊肿;下肢静脉血栓形成	好转	黄俊武	王鉴顺	蔡乐益	股骨骨折闭合复位术
158	D10(创伤2)	2022-02-07	2022-02-15	3194745	黄爱奇	女	70Y	股骨粗隆间骨折	下肢动脉粥样硬化;髋关节积液;下肢静脉血栓形成	治愈	石成弟	石成弟	张儒	股骨骨折闭合复位术
159	D10(创伤2)	2022-02-02	2022-02-24	3196328	缪巧妹	女	85Y	股骨粗隆间骨折	原发性肺动脉高压;慢性胃炎;肝囊肿;下肢动脉粥样硬化;下肢静脉血栓形成	治愈	陈华	孙辽军	卢迪	股骨骨折切开复位术
160	D10(创伤2)	2022-02-22	2022-03-05	3199306	林秀时	女	79Y	股骨髁骨折	胸椎骨折;慢性支气管炎;下肢动脉粥样硬化;下肢静脉血栓形成;心房颤动;室性早搏;腰椎骨折	治愈	石成弟	石成弟	张儒	股骨骨折切开复位钢板内固定术
161	D10(创伤2)	2022-03-12	2022-03-21	3205137	叶秀兰	女	86Y	股骨粗隆间骨折	动脉硬化性心脏病;胆囊结石;下肢动脉粥样硬化;静脉栓塞和血栓形成;肺动脉高压中度;具有心脏起搏器;胫前动脉狭窄	好转	黄俊武	王鉴顺	蔡乐益	股骨骨折切开复位钢板内固定术
162	D10(创伤2)	2022-03-12	2022-03-23	3205895	周美凤	女	57Y	肱骨上端骨折	肋骨骨折;慢性鼻窦炎;肺挫伤;创伤性皮下气肿;面部软组织挫伤;2型糖尿病;下肢静脉血栓形成	好转	黄俊武	王鉴顺	蔡乐益	肱骨骨折切开复位螺钉内固定术
163	D10(创伤2)	2022-03-30	2022-04-12	3212877	谢春兰	女	67Y	股骨下端骨折	脂肪肝;下肢动脉粥样硬化;高血压病;肾结石;下肢特指深部脉管静脉炎和血栓性静脉炎	治愈	石成弟	石成弟	张儒	下肢静脉造影;股骨骨折切开复位钢板内固定术;股静脉穿刺术;下肢静脉滤器置入术
164	D10(创伤2)	2022-04-16	2022-04-20	3215973	刘爱莲	女	64Y	取除骨折内固定装置	后天性肾囊肿;肾结石;下肢静脉血栓形成;胆囊息肉;肝囊肿;乳腺腺病	其他	石成弟	石成弟	张儒	跟骨内固定物取出术
165	D10(创伤2)	2022-04-09	2022-04-20	3216278	李秀兰	女	68Y	股骨颈骨折	颈动脉硬化;下肢动脉粥样硬化;胆囊结石;下肢静脉血栓形成;特指手术后状态;肝囊肿;脂肪肝;高血压病	好转	黄俊武	王鉴顺	蔡乐益	人工股骨头置换术
166	D10(创伤2)	2022-04-26	2022-05-07	3221778	瞿足妹	女	96Y	股骨粗隆间骨折	下肢动脉粥样硬化;下肢静脉血栓形成;骨质疏松;高血压病	治愈	黄义星	余贤斌	余贤斌	股骨骨折闭合复位钢针内固定术
167	D10(创伤2)	2022-05-11	2022-05-19	3226439	朱朋兰	女	69Y	髌骨骨折	下肢动脉粥样硬化;下肢静脉血栓形成;脂肪肝;高血压病	治愈	陈华	孙辽军	卢迪	髌骨骨折切开复位螺钉内固定术
168	D10(创伤2)	2022-05-14	2022-05-22	3227529	朱明设	男	54Y	胫腓骨下端骨折	下肢动脉粥样硬化;后天性肾囊肿;脂肪肝;下肢静脉血栓形成	好转	黄俊武	王鉴顺	蔡乐益	胫骨骨折切开复位螺钉内固定术;胫骨植骨术;踝关节融合术
169	D10(创伤2)	2022-06-06	2022-06-13	3235772	陈笑萍	女	61Y	跖骨骨折	腰椎骨折;肝囊肿;下肢静脉血栓形成;肺结节;特指腹部区域诊断性影像检查异常所见;下肢动脉粥样硬化;皮肤挫伤	好转	黄俊武	王鉴顺	蔡乐益	跖骨骨折切开复位钢针内固定术
170	D10(创伤2)	2022-05-29	2022-06-13	3235953	徐莲翠	女	66Y	股骨颈骨折	下肢静脉炎和血栓性静脉炎;下肢动脉粥样硬化;脑卒中后遗症;高血压病	好转	黄义星	黄义星	卢迪	人工股骨头置换术
171	D10(创伤2)	2022-05-11	2022-06-15	3236756	李爱莲	女	70Y	股骨粗隆间骨折	肺结节;下肢静脉血栓形成;胸腔积液;呼吸困难;桡骨下端骨折;2型糖尿病;高血压病;肝硬化失代偿期;脾功能亢进	治愈	陈华	陈华	王特	股骨骨折切开复位钢板内固定术
172	D10(创伤2)	2022-06-13	2022-06-20	3238321	朱招弟	女	87Y	股骨粗隆间骨折	人工髋关节;后天性肾囊肿;胆囊胆固醇沉着症;胆囊结石;脂肪肝;下肢静脉血栓形成;下肢深静脉血栓形成	好转	黄俊武	王鉴顺	蔡乐益	股骨骨折切开复位钢板内固定术
173	D10(创伤2)	2022-06-14	2022-06-25	3240084	金花柳	女	85Y	股骨粗隆间骨折	高血压病;2型糖尿病;髋关节强硬;胸腔积液;下肢静脉血栓形成;主动脉钙化;甲状腺结节;甲状腺钙化;特指腹部区域诊断性影像检查异常所见;下肢动脉粥样硬化	好转	石成弟	石成弟	胡炜	股骨骨折闭合复位螺钉内固定术
174	D10(创伤2)	2022-06-17	2022-06-26	3240490	伍月兰	女	69Y	髌骨骨折	二尖瓣返流;肝囊肿;脂肪肝;下肢静脉血栓形成	好转	黄俊武	王鉴顺	蔡乐益	髌骨骨折切开复位螺钉内固定术;髌韧带缝合术
175	D10(创伤2)	2022-06-16	2022-06-27	3240752	郑国毫	男	50Y	闭合性胫骨平台骨折	脂肪肝;下肢深静脉血栓形成	好转	黄俊武	王鉴顺	蔡乐益	胫骨骨折切开复位钢板内固定术
176	D10(创伤2)	2022-06-21	2022-07-02	3242564	张东明	男	23Y	髌骨骨折	上颌骨骨折;鼻骨骨折;下肢静脉血栓形成;眶骨骨折;颧骨骨折	治愈	黄义星	黄义星	卢迪	髌骨骨折切开复位张力带钢丝内固定术
177	D10(创伤2)	2022-06-23	2022-07-04	3243634	谢立山	男	94Y	股骨粗隆间骨折	下肢动脉粥样硬化;后天性肾囊肿;静脉栓塞和血栓形成;下肢动脉硬化闭塞症	好转	陈华	孙辽军	王特	股骨骨折闭合复位螺钉内固定术
178	D10(创伤2)	2022-06-25	2022-07-06	3244472	富华娟	女	68Y	股骨骨折	静脉栓塞和血栓形成;心功能不全;高血压病;脂肪肝;心房肥大;主动脉瓣关闭不全	好转	石成弟	胡炜	胡炜	髋关节松解术;全髋关节置换术;髋关节滑膜切除术
179	D10(创伤2)	2022-07-01	2022-07-09	3245749	王盛程	男	61Y	股骨骨折	下肢动脉粥样硬化;下肢静脉血栓形成;下肢静脉曲张;脂肪肝;肾结石	治愈	石成弟	胡炜	胡炜	股骨骨折闭合复位钢针内固定术;股骨植骨术
180	D10(创伤2)	2022-07-05	2022-07-18	3249776	郭碎凤	女	76Y	股骨颈骨折	下肢动脉栓塞和血栓形成;下肢动脉粥样硬化;肝囊肿;后天性肾囊肿	好转	陈华	孙辽军	王特	人工股骨头置换术
181	D10(创伤2)	2022-07-14	2022-07-23	3251376	季美雪	女	82Y	股骨骨折	桡骨下端骨折;尺骨茎突骨折;2型糖尿病;肺恶性肿瘤;陈旧性肋骨骨折;肝回声不均;下肢动脉粥样硬化;下肢静脉血栓形成	好转	黄俊武	王鉴顺	蔡乐益	人工股骨头置换术
182	D10(创伤2)	2022-07-08	2022-07-24	3252275	林启禀	男	64Y	胫腓骨干骨折	颈椎关节强硬;硬脑膜下积液;多发性脑梗死;肝病;2型糖尿病;静脉栓塞和血栓形成;下肢动脉粥样硬化;膝关节副韧带扭伤;腓骨骨折;颈部脊髓损伤;皮肤挫伤	治愈	黄义星	黄义星	卢迪	胫骨植骨术;下腔静脉滤器置入术;股静脉穿刺术;胫骨骨折切开复位钢板内固定术;副韧带修补术
183	D10(创伤2)	2022-07-10	2022-07-27	3253428	朱巧云	女	68Y	多发性骨盆骨折	肺结节;颈椎间盘突出;头皮血肿;下肢动脉粥样硬化;下肢静脉血栓形成;髂骨骨折;耻骨骨折;髋臼骨折;脂肪肝;腹水;颅底骨折	好转	陈华	孙辽军	王特	骨盆骨折切开复位钢板内固定术
184	D10(创伤2)	2022-07-26	2022-08-06	3257414	项多多	女	62Y	闭合性胫骨平台骨折	下肢静脉血栓形成;下肢动脉粥样硬化	好转	陈华	孙辽军	王特	胫骨骨折切开复位钢板内固定术
185	D10(创伤2)	2022-07-26	2022-08-13	3260002	陶加顺	男	55Y	股骨骨折	高血压病;下肢静脉血栓形成;前列腺结石;睾丸鞘膜积液;脂肪肝;肝囊肿	好转	黄俊武	王鉴顺	蔡乐益	股骨植骨术;股骨骨折闭合复位螺钉内固定术
186	D10(创伤2)	2022-08-07	2022-08-14	3260695	王玉虎	男	80Y	股骨颈骨折	脂肪肝;后天性肾囊肿;下肢静脉血栓形成;腔隙性脑梗死;老年性脑萎缩;颈动脉硬化	好转	陈华	孙辽军	王特	人工股骨头置换术
187	D10(创伤2)	2022-08-19	2022-08-28	3266159	陈仁福	男	82Y	股骨骨折	插入矫形外科关节假体后骨折;后天性肾囊肿;下肢动脉粥样硬化;下肢静脉血栓形成;脂肪瘤	好转	黄俊武	王鉴顺	蔡乐益	股骨植骨术;股骨骨折切开复位术
188	D10(创伤2)	2022-08-24	2022-09-03	3268481	陈可寿	男	61Y	髌骨骨折	高血压病;2型糖尿病;下肢动脉粥样硬化;下肢静脉血栓形成	好转	黄义星	黄义星	卢迪	髌骨骨折切开复位螺钉内固定术
189	D10(创伤2)	2022-08-28	2022-09-07	3270245	游雪某	女	84Y	股骨粗隆间骨折	高血压病;下肢动脉粥样硬化;下肢静脉炎和血栓性静脉炎;后天性肾囊肿	好转	陈华	孙辽军	蔡乐益	股骨骨折闭合复位螺钉内固定术
190	D10(创伤2)	2022-09-12	2022-09-24	3276535	金冬眉	女	50Y	股骨粗隆间骨折	下腔静脉血栓形成	好转	黄俊武	王鉴顺	218239	股骨植骨术;股骨骨折闭合复位钢针内固定术
191	D10(创伤2)	2022-09-13	2022-09-25	3276789	何玉燕	女	70Y	股骨粗隆间骨折	下肢静脉血栓形成;脂肪肝;胆囊结石;胆总管扩张;后天性肾囊肿;2型糖尿病;高血压病;精神分裂症	好转	陈华	孙辽军	王特	股骨骨折闭合复位螺钉内固定术
192	D10(创伤2)	2022-10-02	2022-10-03	3280270	宋谋传	男	55Y	腰椎骨折	下肢静脉血栓形成;胆囊息肉;前列腺增生;前列腺结石	好转	黄俊武	王鉴顺	218239
193	D10(创伤2)	2022-09-19	2022-10-08	3281310	李文菊	女	66Y	肱骨上端骨折	肩袖损伤;颈椎骨折;下肢动脉粥样硬化;静脉栓塞和血栓形成;胸椎骨折;完全性右束支传导阻滞;左前分支传导阻滞;头皮血肿;2型糖尿病;肋骨骨折	好转	黄义星	黄义星	卢迪	肩袖修补术;肱骨骨折切开复位钢板内固定术
194	D10(创伤2)	2022-09-30	2022-10-10	3281846	陈春桃	女	82Y	股骨粗隆间骨折	老年性脑变性;膝关节病;高血压病;下肢动脉粥样硬化;下肢静脉血栓形成	好转	黄俊武	王鉴顺	218239	股骨植骨术;股骨骨折闭合复位钢针内固定术
195	D10(创伤2)	2022-10-01	2022-10-10	3281905	池良臣	男	93Y	股骨粗隆间骨折	前列腺增生;肺大泡;肺部感染;胸腔积液;下肢动脉粥样硬化;下肢静脉血栓形成;后天性肾囊肿	好转	陈华	陈华	蔡乐益	股骨骨折闭合复位螺钉内固定术
196	D10(创伤2)	2022-10-06	2022-10-10	3282022	王金花	女	65Y	股骨颈骨折	主动脉瓣关闭不全;下肢静脉血栓形成;肝硬化;肝肿物;脾大;腹水;心功能不全;泌尿器官诊断性影像检查异常所见;特指手术后状态;肝恶性肿瘤个人史	好转	陈华	陈华	蔡乐益
197	D10(创伤2)	2022-10-03	2022-10-11	3282528	沈新发	男	84Y	股骨粗隆间骨折	冠状动脉粥样硬化性心脏病;胸腔积液;下肢动脉粥样硬化;下肢动脉硬化闭塞症;下肢静脉血栓形成;脂肪肝;胆囊息肉;后天性肾囊肿	好转	陈华	陈华	王特	股骨骨折切开复位钢板内固定术
198	D10(创伤2)	2022-10-06	2022-10-15	3283626	孙珠香	女	81Y	股骨颈骨折	下肢动脉粥样硬化;下肢静脉血栓形成;肾结石;肺结节	好转	陈华	陈华	蔡乐益	人工股骨头置换术
199	D10(创伤2)	2022-10-10	2022-10-19	3285603	陈飘盈	男	81Y	多发性骨盆骨折	骶骨骨折;腹股沟斜疝;后天性肾囊肿;肺部感染;胸腔积液;老年性脑萎缩;慢性上颌窦炎;高血压病;下肢动脉粥样硬化;下肢静脉血栓形成;陈旧性股骨骨折	好转	陈华	陈华	蔡乐益	骨盆骨折闭合复位术
200	D10(创伤2)	2022-10-18	2022-10-29	3289560	叶爱萍	女	56Y	跟骨骨折	外踝骨折;心律失常;下肢静脉血栓形成	好转	陈华	陈华	蔡乐益	关节软骨修复术;踝关节骨折切开复位螺钉内固定术;跟骨骨折切开复位螺钉内固定术
201	D10(创伤2)	2022-10-11	2022-11-02	3291166	张志强	男	50Y	胫骨下端骨折	股骨头无菌性坏死;2型糖尿病;下肢动脉粥样硬化;下肢静脉血栓形成;高血压病;骨折治疗后恢复期	治愈	黄义星	黄义星	卢迪	胫骨外固定架固定术;胫骨植骨术
202	D10(创伤2)	2022-11-06	2022-11-11	3294614	张素妹	女	52Y	跖骨骨折	胆囊息肉;下肢静脉血栓形成;高血压病	好转	黄俊武	王鉴顺	218239	跖骨骨折切开复位钢板内固定术
203	D10(创伤2)	2022-11-06	2022-11-16	3296550	周月清	男	83Y	股骨粗隆间骨折	前列腺增生;高血压病;痛风;下肢动脉粥样硬化;下肢静脉血栓形成;脂肪肝;肝囊肿;泌尿系结石	好转	黄俊武	王鉴顺	218239	股骨植骨术;股骨骨折切开复位钢板内固定术
204	D10(创伤2)	2022-11-04	2022-11-21	3296558	黄凤钗	女	60Y	骨盆骨折	下肢静脉血栓形成;耳浅表损伤;髂骨骨折;髋臼骨折;耻骨骨折;胸椎骨折;头皮血肿;脑震荡;颈椎骨折;腰椎间盘突出;脂肪肝	好转	黄俊武	王鉴顺	218239	骨盆骨折切开复位钢板内固定术;关节软骨修复术;髂动脉造影;髂内动脉栓塞术
205	D10(创伤2)	2022-11-23	2022-12-03	3303156	温周弟	女	81Y	股骨颈骨折	骨囊肿;肺结节;肺炎;下肢静脉血栓形成;后天性肾囊肿;胸腔积液	好转	黄俊武	王鉴顺	218239	髋关节滑膜切除术;人工股骨头置换术;关节软骨修复术
206	D10(创伤2)	2022-11-26	2022-12-04	3303375	胡丽华	女	59Y	髌骨骨折	下肢静脉血栓形成;脂肪肝;后天性肾囊肿;肾结石	好转	黄俊武	王鉴顺	218239	髌骨骨折切开复位螺钉内固定术;关节软骨修复术
207	D10(创伤2)	2022-11-28	2022-12-06	3304166	胡希斌	男	84Y	股骨粗隆间骨折	肺栓塞;下肢静脉血栓形成;前列腺增生;心力衰竭	好转	黄俊武	王鉴顺	218239	股骨骨折闭合复位钢针内固定术;股骨植骨术
208	D10(创伤2)	2022-11-27	2022-12-06	3304218	赵美莲	女	87Y	股骨粗隆间骨折	高血压病;肾结石;肺部感染;下肢静脉血栓形成;胆囊结石	好转	陈华	孙辽军	蔡乐益	股骨骨折闭合复位螺钉内固定术
209	D10(创伤2)	2022-12-01	2022-12-10	3305712	蔡修炉	男	70Y	股骨颈骨折	高血压病;2型糖尿病;下肢静脉血栓形成	好转	陈华	孙辽军	蔡乐益	关节软骨修复术;髋关节滑膜切除术;全髋关节置换术;下腔静脉滤器置入术
210	D10(创伤2)	2022-12-05	2022-12-11	3306386	朱作翠	女	82Y	胸椎骨折	跖骨骨折;腰椎间盘突出;2型糖尿病;下肢静脉血栓形成	治愈	石成弟	胡炜	胡炜	胸椎骨折球囊扩张成形术
211	D10(创伤2)	2022-12-07	2022-12-17	3308313	陈秀英	女	88Y	股骨颈骨折	胸腔积液;肺特指疾患;后天性肾囊肿;老年性脑萎缩;下肢静脉血栓形成	好转	黄俊武	王鉴顺	218239	髋关节滑膜切除术;人工股骨头置换术;关节软骨修复术
212	D10(创伤2)	2022-12-11	2022-12-18	3308923	叶唐妹	女	88Y	股骨颈骨折	高血压病;下肢静脉血栓形成;肝囊肿;胆囊结石	好转	黄俊武	王鉴顺	218239	人工股骨头置换术;关节软骨修复术;髋关节滑膜切除术
213	D10(创伤2)	2022-12-13	2022-12-20	3309731	丁岩翠	女	78Y	股骨颈骨折	下肢动脉粥样硬化;下肢静脉血栓形成;后天性肾囊肿	好转	黄俊武	王鉴顺	218239	关节软骨修复术;髋关节滑膜切除术;人工股骨头置换术
214	D10(创伤2)	2022-12-09	2022-12-20	3309766	叶际菊	女	88Y	股骨颈骨折	肝囊肿;肝钙化灶;胆囊息肉;后天性肾囊肿;下肢静脉血栓形成	治愈	石成弟	胡炜	胡炜	髋关节滑膜切除术;人工股骨头置换术
215	D10(创伤2)	2022-12-17	2022-12-27	3312407	王领弟	女	65Y	双踝骨折	踝关节脱位;下肢静脉血栓形成;骨质疏松;高血压病	治愈	黄义星	黄义星	张儒	踝关节融合术;踝关节脱位切开复位术;踝关节骨折切开复位钢板内固定术
216	D10(创伤2)	2022-12-16	2022-12-27	3312434	洪立松	男	55Y	腓骨骨折	下肢静脉血栓形成;胆囊息肉	好转	黄俊武	王鉴顺	218239	皮肤和皮下坏死组织切除清创术;腓骨骨折切开复位钢板内固定术
217	D11(创伤3)	2021-12-26	2022-01-04	3179019	林月德	男	74Y	股骨颈骨折	头部外伤;面部擦伤;手指挫伤;后天性肾囊肿;下肢静脉血栓形成;多发性肝囊肿;肾结石	治愈	潘骏	冯永增	冯永增	皮肤缝合术;全髋关节表面置换术
218	D11(创伤3)	2022-01-01	2022-01-08	3180035	汤建香	女	43Y	骶骨骨折	耻骨骨折;头皮血肿;胆囊结石;下肢静脉血栓形成;胸膜炎;肺炎;下肢静脉曲张	好转	潘骏	冯永增	冯永增
219	D11(创伤3)	2021-12-23	2022-01-11	3181399	戴竹兰	女	81Y	股骨粗隆间骨折	陈旧性肋骨骨折;手指挫伤;下肢静脉血栓形成;胰损伤;后天性肾囊肿;肺炎	治愈	余可和	余可和	卢晓郎	下肢静脉造影;下腔静脉滤器置入术;股静脉穿刺术;股骨骨折闭合复位螺钉内固定术
220	D11(创伤3)	2021-12-29	2022-01-19	3184140	徐月华	女	65Y	股骨粗隆间骨折	胫骨上端骨折;特指器官后天性缺失;鹰嘴骨折;骨质疏松;下肢静脉血栓形成;肝囊肿;肾钙化;乳房恶性肿瘤个人史;骨肿物	治愈	王振文	水小龙	何自力	胫骨骨折切开复位钢板内固定术;股骨骨折切开复位髓内针内固定术;尺骨骨折切开复位钢板内固定术
221	D11(创伤3)	2022-01-13	2022-01-23	3185474	翁周花	女	78Y	股骨粗隆间骨折	胆囊结石;下肢动脉粥样硬化;下肢静脉血栓形成;胆汁淤积症;肺气肿;肺大泡;支气管扩张伴感染	治愈	洪建军	余洋	郑亦静	股骨骨折闭合复位髓内针内固定术
222	D11(创伤3)	2022-01-09	2022-01-25	3186119	卢金山	男	76Y	创伤后伤口感染	脑血栓后遗症;高血压病;后天性肾囊肿;下肢动脉粥样硬化;心房颤动;骨折治疗后恢复期;足软组织感染	治愈	余可和	余可和	卢晓郎	中厚皮片移植术;皮肤和皮下坏死组织切除清创术;皮肤和皮下组织血肿抽吸术
223	D11(创伤3)	2022-01-22	2022-02-01	3188620	吕秋玉	女	66Y	股骨颈骨折	桡骨下端骨折;心房颤动;下肢静脉血栓形成;心动过速	治愈	潘骏	冯永增	冯永增	桡骨骨折切开复位钢板内固定术;全髋关节置换术
224	D11(创伤3)	2022-02-05	2022-02-12	3193096	唐明弟	男	51Y	胫骨下端骨折	足舟状骨骨折;距骨骨折;下肢静脉血栓形成;胆囊息肉	治愈	洪建军	余洋	郑亦静	跗骨骨折切开复位螺钉内固定术;胫骨骨折切开复位钢板内固定术
225	D11(创伤3)	2022-02-03	2022-02-13	3193629	雷丽芳	女	45Y	股骨粗隆间骨折	面部损伤;下肢静脉血栓形成;肩回旋套肌腱损伤;跟骨骨折;肩关节脱位	治愈	洪建军	余洋	郑亦静	跟骨骨折切开复位钢板内固定术;股骨骨折闭合复位髓内针内固定术;跟骨人工骨植骨术
226	D11(创伤3)	2022-02-06	2022-02-13	3193676	吴明匡	男	73Y	股骨颈骨折	股骨干骨折;急性冠脉综合征;后天性肾囊肿;肾钙化;下肢静脉血栓形成	治愈	洪建军	余洋	郑亦静	股骨骨折闭合复位髓内针内固定术
227	D11(创伤3)	2022-02-07	2022-02-14	3194175	蔡寸梅	女	83Y	股骨颈骨折	高血压病;糖尿病;下肢静脉血栓形成;下肢动脉粥样硬化;房性早搏;室性早搏;后天性肾囊肿	治愈	潘骏	冯永增	冯永增	人工股骨头置换术
228	D11(创伤3)	2022-02-18	2022-02-26	3196726	周碎媚	女	79Y	股骨颈骨折	肾结石;肺动脉高压轻度;后天性肾囊肿;下肢动脉粥样硬化;下肢静脉血栓形成	治愈	洪建军	余洋	郑亦静	人工股骨头置换术
229	D11(创伤3)	2022-02-12	2022-03-12	3201903	叶友金	男	69Y	开放性胫腓骨干骨折	高血压病;后天性肾囊肿;前列腺结石;下肢动脉粥样硬化;下肢静脉血栓形成	治愈	洪建军	余洋	郑亦静	中厚皮片移植术;胫骨开放性骨折清创术;胫骨外固定架固定术
230	D11(创伤3)	2022-03-03	2022-03-13	3202195	杨柳弟	女	80Y	股骨干骨折	下肢静脉血栓形成;脂肪肝;胆囊息肉;后天性肾囊肿;下肢动脉粥样硬化	治愈	潘骏	冯永增	项光恒	股骨骨折切开复位钢板内固定术
231	D11(创伤3)	2022-03-10	2022-03-16	3203372	蔡永明	女	55Y	双踝骨折	耻骨骨折;髋臼骨折;腰骶部脊柱骨折;肌肉损伤;多发性肋骨骨折;多发性肝囊肿;原发性肺动脉高压;盆腔损伤;下肢静脉血栓形成;髋部肌肉和肌腱损伤	治愈	潘骏	冯永增	项光恒	踝关节骨折切开复位螺钉内固定术
232	D11(创伤3)	2022-03-07	2022-03-23	3206137	徐杨柳	女	54Y	闭合性胫骨平台骨折	小腿水平腓神经损伤;腹水;创伤性胸腔积液;尿毒症;2型糖尿病;下肢静脉血栓形成	治愈	洪建军	余洋	郑亦静	同种异体骨植骨术;胫骨骨折切开复位钢板内固定术
233	D11(创伤3)	2022-03-17	2022-03-24	3206472	董地眉	女	46Y	取除骨折内固定装置	下肢静脉血栓形成	其他	洪建军	余洋	郑亦静	踝关节内固定物取出术;胫骨内固定物取出术;锁骨内固定物取出术
234	D11(创伤3)	2022-03-28	2022-04-03	3209889	汪金生	男	54Y	髌骨骨折	下肢动脉粥样硬化;下肢静脉血栓形成;胆汁淤积症;胆囊结石嵌顿	治愈	洪建军	余洋	郑亦静	髌骨骨折切开复位张力带钢丝内固定术
235	D11(创伤3)	2022-03-28	2022-04-07	3211284	章厚其	男	91Y	股骨颈骨折	下肢静脉血栓形成;脂肪肝;谵妄;前列腺增生;多发性脑梗死	治愈	余可和	余可和	卢晓郎	股静脉穿刺术;人工股骨头置换术;下腔静脉滤器置入术
236	D11(创伤3)	2022-04-04	2022-04-09	3211980	陈金昌	男	92Y	股骨颈骨折	颈动脉硬化;心房颤动;肾积水伴肾结石;肋骨骨折;前列腺增生;腺性膀胱炎;膀胱结石;肺部感染;下肢静脉血栓形成;心包积液	未愈	潘骏	冯永增	项光恒
237	D11(创伤3)	2022-04-03	2022-04-17	3214644	叶强花	女	69Y	胫腓骨干骨折	高血压病;脂肪肝;股静脉血栓形成;特指肾盂积水;肝囊肿;心房颤动	好转	王振文	水小龙	何自力	胫骨骨折闭合复位髓内针内固定术
238	D11(创伤3)	2022-04-06	2022-04-19	3215548	杨大联	男	79Y	股骨颈骨折	下肢动脉硬化闭塞症;心功能不全;高血压病;二尖瓣及三尖瓣关闭不全;具有心脏起搏器;肝回声不均;老年性脑萎缩;肾结石;多发性脑梗死;心室肥厚;慢性胃炎;下肢静脉血栓形成;心室扩大;下肢动脉粥样硬化	治愈	余可和	余可和	卢晓郎	全髋关节置换术;金属-聚乙烯髋关节置换
239	D11(创伤3)	2022-04-16	2022-04-26	3218100	叶友金	男	69Y	开放性胫腓骨干骨折	前列腺结石;下腔静脉血栓形成;高血压病;后天性肾囊肿;下肢动脉硬化闭塞症	治愈	洪建军	余洋	郑亦静	胫骨骨折切开复位钢板内固定术
240	D11(创伤3)	2022-04-18	2022-04-26	3218102	金纯兰	女	74Y	髌骨骨折	下肢动脉粥样硬化;冠状动脉粥样硬化性心脏病;高血压病;冠状动脉支架植入后状态;肾结石;后天性肾囊肿;2型糖尿病;髌骨脱位;肾钙化;脂肪肝;下肢动脉狭窄;下肢静脉血栓形成	治愈	王振文	水小龙	何自力	髌韧带缝合术;髌骨骨折切开复位张力带钢丝内固定术
241	D11(创伤3)	2022-04-08	2022-04-28	3218998	郑祺钗	女	57Y	闭合性胫骨平台骨折	膝关节十字韧带扭伤;下肢静脉血栓形成;胆囊息肉;后天性肾囊肿	好转	王振文	水小龙	何自力	股静脉穿刺术;胫骨骨折切开复位钢板内固定术;下腔静脉滤器置入术
242	D11(创伤3)	2022-03-30	2022-05-03	3220865	方福城	男	77Y	创伤后伤口感染	肝囊肿;前列腺增生;下肢动脉粥样硬化;高血压病;后天性肾囊肿;肾结石;取除骨折内固定装置;骨质疏松;前列腺结石;下肢静脉血栓形成	治愈	余可和	余可和	卢晓郎	皮肤和皮下坏死组织切除清创术;创面负压封闭引流[VSD];跖骨内固定物取出术;皮肤和皮下组织非切除性清创
243	D11(创伤3)	2022-05-11	2022-05-21	3226969	王薛昌	男	68Y	股骨颈骨折	下肢动脉粥样硬化;特指主动脉瓣疾患;主动脉瓣关闭不全;肝囊肿;下肢静脉血栓形成	治愈	余可和	余可和	卢晓郎	全髋关节置换术;陶瓷-聚乙烯髋关节置换
244	D11(创伤3)	2022-05-06	2022-05-21	3226996	蔡世亲	男	60Y	股骨粗隆间骨折	下肢静脉血栓形成	治愈	水小龙	水小龙	何自力	股骨骨折闭合复位髓内针内固定术
245	D11(创伤3)	2022-05-14	2022-05-21	3227014	李啊儿	女	85Y	股骨粗隆间骨折	室间隔肥大;肺结节;下肢动脉粥样硬化;主动脉瓣关闭不全;高血压病;肝回声不均;后天性肾囊肿;特指肾盂积水;胆囊息肉;下肢静脉血栓形成;主动脉钙化;心房肥大;心功能不全	治愈	余可和	余可和	卢晓郎	股骨骨折闭合复位髓内针内固定术
246	D11(创伤3)	2022-05-17	2022-05-23	3228033	陈洪寿	男	66Y	大腿内收肌腱损伤	足挫伤;腓骨骨折;大隐静脉曲张;下肢静脉血栓形成;股四头肌腱断裂;下肢动脉粥样硬化;开放性膝部损伤;高血压病	治愈	洪建军	余洋	郑亦静	中厚皮片移植术;下肢肌肉缝合术;髌韧带缝合术;皮肤和皮下坏死组织切除清创术;下肢肌腱缝合术
247	D11(创伤3)	2022-05-17	2022-05-26	3229225	钱恒富	男	45Y	股骨粗隆间骨折	股骨粗隆下骨折;下肢动脉粥样硬化;下肢深静脉血栓形成	治愈	洪建军	余洋	郑亦静	股骨骨折闭合复位髓内针内固定术
248	D11(创伤3)	2022-06-03	2022-06-11	3234820	潘连织	女	77Y	股骨粗隆间骨折	下肢深静脉血栓形成	好转	王振文	水小龙	何自力	股骨骨折闭合复位螺钉内固定术;股静脉穿刺术;下腔静脉滤器置入术
249	D11(创伤3)	2022-05-28	2022-06-13	3235974	刘家伟	男	55Y	胫骨骨折	下肢缺血;下肢静脉血栓形成;下肢动脉血栓形成;血小板减少症	好转	王振文	王振文	何自力	胫骨骨折闭合复位螺钉内固定术;下肢动脉导管溶栓
250	D11(创伤3)	2022-06-03	2022-06-16	3237034	许阿绸	女	63Y	股骨颈骨折	下肢静脉血栓形成;后天性肾囊肿;下肢动脉粥样硬化;胆囊息肉	治愈	余可和	余可和	卢晓郎	下腔静脉滤器置入术;下肢静脉造影;全髋关节置换术
251	D11(创伤3)	2022-06-03	2022-06-17	3237389	方美菊	女	70Y	股骨髁骨折	下肢动脉粥样硬化;主动脉瓣关闭不全;下肢静脉血栓形成;精神障碍	治愈	余可和	余可和	卢晓郎	股骨骨折切开复位钢板内固定术;下腔静脉滤器置入术;下肢静脉造影
252	D11(创伤3)	2022-06-09	2022-06-20	3238244	钱吕妹	女	92Y	股骨粗隆间骨折	特指肾盂积水;下肢动脉粥样硬化;肝占位性病变;肺部感染;下肢静脉血栓形成	治愈	余可和	余可和	卢晓郎	股骨骨折闭合复位髓内针内固定术;下腔静脉滤器置入术;下肢静脉造影
253	D11(创伤3)	2022-06-26	2022-06-27	3241158	林三翠	女	87Y	髌骨骨折	肾结石;下肢动脉粥样硬化;高血压病;下肢静脉血栓形成	好转	余可和	余可和	卢晓郎
254	D11(创伤3)	2022-06-23	2022-07-05	3244054	陆康英	女	78Y	股骨髁骨折	脂肪肝;胆囊胆固醇沉着症;下肢动脉粥样硬化;下肢静脉血栓形成;骨质疏松;肺结节;后天性肾囊肿;胆囊结石	治愈	潘骏	潘骏	金海东	股骨骨折切开复位钢板内固定术
255	D11(创伤3)	2022-07-13	2022-07-23	3251596	李贤伟	女	48Y	开放性股骨下端骨折	膝挫伤;髋和大腿水平坐骨神经损伤;大腿撕脱伤;腰椎骨折;头皮血肿;胸腔积液;2型糖尿病;脂肪肝;肾积水伴肾结石;下肢静脉血栓形成	治愈	洪建军	余洋	郑亦静	下肢动脉探查术;股骨开放性骨折清创术;股骨骨折切开复位钢板内固定术
256	D11(创伤3)	2022-07-18	2022-07-30	3254554	沙定益	男	77Y	股骨粗隆间骨折	主动脉钙化;冠状动脉粥样硬化;退行性主动脉瓣疾患;心功能不全;下肢静脉血栓形成;高血压病;贫血;心脏病;陈旧性肺结核;肺气肿;肺大泡;下肢动脉粥样硬化;肺纤维化;胆囊结石;前列腺增生	治愈	余可和	余可和	卢晓郎	股骨骨折闭合复位髓内针内固定术
257	D11(创伤3)	2022-07-12	2022-08-09	3258651	叶爱英	女	62Y	胫骨骨折累及踝关节	膝关节十字韧带扭伤;膝关节副韧带扭伤;膝内侧半月板损伤;膝外侧半月板损伤;创伤后伤口感染;髋臼骨折;耻骨骨折;髂骨骨折;大腿挫伤;腰椎骨折;外伤性硬脑膜下积液;下肢皮肤套脱伤;肺炎;下肢深静脉血栓形成;下肢静脉血栓形成;下肢动脉粥样硬化	治愈	潘骏	潘骏	金海东	股静脉穿刺术;下腔静脉滤器置入术;踝关节骨折切开复位螺钉内固定术;皮肤和皮下坏死组织切除清创术;骨盆外固定架去除术
258	D11(创伤3)	2022-07-28	2022-08-10	3259232	周克生	男	68Y	股骨颈骨折	高血压病;房性早搏;糖尿病;胃部分后天性缺失;贫血;后天性肾囊肿;Ⅰ度房室传导阻滞;主动脉瓣关闭不全;退行性主动脉瓣疾患;超声心动图异常;下肢动脉粥样硬化;下肢静脉血栓形成;肝血管瘤;肺结节;肝囊肿;肺炎	治愈	王振文	水小龙	何自力	陶瓷-聚乙烯髋关节置换;全髋关节置换术
259	D11(创伤3)	2022-08-06	2022-08-13	3260093	丁爱华	女	63Y	髌骨骨折	下肢静脉血栓形成;腰椎间盘突出;肝回声不均;肾结石;退行性主动脉瓣疾患;主动脉瓣关闭不全	治愈	余可和	余可和	卢晓郎	股静脉穿刺术;下腔静脉滤器置入术;髌骨骨折切开复位张力带钢丝内固定术
260	D11(创伤3)	2022-08-03	2022-08-14	3260598	金可中	男	70Y	股骨粗隆间骨折	高血压病;下肢动脉粥样硬化;下肢静脉血栓形成;后天性肾囊肿	治愈	王振文	水小龙	何自力	股骨骨折闭合复位螺钉内固定术
261	D11(创伤3)	2022-08-07	2022-08-16	3261592	黄莲莲	女	71Y	股骨髁骨折	下肢静脉血栓形成;退行性主动脉瓣疾患;脂肪肝;下肢动脉粥样硬化;肺结节;超声心动图异常	治愈	余可和	余可和	卢晓郎	股骨骨折切开复位钢板内固定术
262	D11(创伤3)	2022-08-07	2022-08-17	3261986	潘爱芝	女	75Y	髌骨骨折	高血压病;下肢静脉血栓形成;肺大泡;主动脉钙化;坠积性肺炎	治愈	潘骏	潘骏	金海东	髌骨骨折切开复位张力带钢丝内固定术
263	D11(创伤3)	2022-08-27	2022-09-04	3268901	李娒弟	女	84Y	骨质疏松伴病理性骨折	多发性肋骨骨折;肝恶性肿瘤;高血压病;2型糖尿病;躯干部血管瘤;下肢动脉硬化闭塞症;下肢静脉血栓形成;胆囊结石;肝硬化;胸椎椎管狭窄	好转	潘骏	潘骏	金海东	胸椎骨折球囊扩张成形术
264	D11(创伤3)	2022-09-15	2022-09-23	3276226	陈秀月	女	67Y	跟骨骨折	多处挫伤;下肢静脉血栓形成;闭合性胫骨平台骨折;桡骨下端骨折;膝关节副韧带扭伤	治愈	王振文	水小龙	218241	副韧带修补术;胫骨骨折切开复位钢板内固定术;跟骨骨折切开复位螺钉内固定术
265	D11(创伤3)	2022-10-03	2022-10-10	3281836	金阿碎	女	88Y	股骨粗隆间骨折	肝囊肿;后天性肾囊肿;膀胱功能检查异常;肺部阴影;下肢动脉粥样硬化;下肢静脉血栓形成	治愈	洪建军	余洋	郑亦静	筋膜缝合术;股骨骨折闭合复位髓内针内固定术
266	D11(创伤3)	2022-10-04	2022-10-15	3283722	周细花	女	77Y	股骨颈骨折	下肢动脉粥样硬化;下肢静脉血栓形成;肺纤维化;主动脉钙化	治愈	潘骏	潘骏	金海东	人工股骨头置换术
267	D11(创伤3)	2022-10-07	2022-10-16	3284170	丽亚娇	女	90Y	股骨粗隆间骨折	后天性肾囊肿;下肢静脉血栓形成	治愈	王振文	水小龙	218241	股骨骨折闭合复位髓内针内固定术
268	D11(创伤3)	2022-10-05	2022-10-18	3285128	叶加星	男	77Y	股骨粗隆间骨折	下肢静脉血栓形成;坏疽;腔隙性脑梗死;高血压病;老年性脑萎缩;下肢动脉粥样硬化	治愈	余可和	卢晓郎	卢晓郎	趾离断术;股骨植骨术;股骨骨折闭合复位髓内针内固定术;皮肤和皮下坏死组织切除清创术;残端皮肤修整术
269	D11(创伤3)	2022-10-22	2022-10-26	3288486	徐进娒	男	85Y	股骨粗隆间骨折	老年性痴呆;肺结节;下肢动脉粥样硬化;下肢静脉血栓形成;下肢动脉硬化闭塞症	未愈	余可和	余可和	卢晓郎
270	D11(创伤3)	2022-10-16	2022-10-29	3289463	宋凤英	女	65Y	股骨颈骨折	脑卒中后遗症;高血压病;下肢动脉粥样硬化;下肢静脉血栓形成;肝囊肿	治愈	王振文	水小龙	218241	陶瓷-聚乙烯髋关节置换;全髋关节表面置换术
271	D11(创伤3)	2022-10-23	2022-10-30	3290195	钱曼菲	女	72Y	三踝骨折	高血压病;2型糖尿病;帕金森病;下肢动脉粥样硬化;下腔静脉血栓形成;脂肪肝;Ⅰ度房室传导阻滞	治愈	洪建军	余洋	郑亦静	踝关节融合术;石膏夹板固定;踝关节骨折切开复位螺钉内固定术
272	D11(创伤3)	2022-11-02	2022-11-12	3294765	夏胜柳	女	80Y	股骨颈骨折	下肢动脉粥样硬化;下肢静脉血栓形成	治愈	王振文	水小龙	218241	人工股骨头置换术
273	D11(创伤3)	2022-10-28	2022-11-12	3295146	唐开品	男	55Y	髋臼骨折	耻骨骨折;盆腔损伤;腹水;阴囊肿大;骶骨骨折;创伤性股动脉血栓形成;股动脉损伤;肠梗阻;胸腔积液	治愈	王振文	水小龙	218241	骨盆骨折闭合复位术;经皮股动脉取栓术;股动脉穿刺术;骨盆外固定架固定术;股动脉覆膜支架置入术
274	D11(创伤3)	2022-11-09	2022-11-21	3298470	梅岳花	女	87Y	股骨粗隆间骨折	下肢动脉粥样硬化;下肢静脉血栓形成;后天性肾囊肿	治愈	王振文	水小龙	218241	筋膜缝合术;股骨骨折闭合复位髓内针内固定术
275	D11(创伤3)	2022-11-15	2022-11-22	3298872	巫爱娟	女	86Y	股骨粗隆间骨折	下肢静脉血栓形成;脂肪肝;肺结节	治愈	余可和	余可和	卢晓郎	筋膜缝合术;股骨骨折闭合复位髓内针内固定术
276	D11(创伤3)	2022-11-13	2022-11-23	3299288	郑祺钗	女	58Y	创伤后伤口感染	取除骨折内固定装置;后天性肾囊肿;下肢静脉血栓形成;高血压病	治愈	王振文	水小龙	218241	皮肤和皮下坏死组织切除清创术;胫骨内固定物取出术
277	D11(创伤3)	2022-11-16	2022-11-26	3300248	何克泽	男	66Y	股骨粗隆间骨折	下肢静脉血栓形成;后天性肾囊肿;前列腺增生;2型糖尿病	治愈	王振文	水小龙	218241	股骨骨折闭合复位髓内针内固定术
278	D11(创伤3)	2022-11-16	2022-11-27	3300853	谢文钱	男	63Y	股骨粗隆间骨折	下肢静脉血栓形成;贫血;肝大;肝回声不均;肝钙化灶;肺结节;陈旧性肋骨骨折;前列腺增生;前列腺结石	治愈	余可和	余可和	卢晓郎	筋膜缝合术;股骨人工骨植骨术;股骨骨折闭合复位髓内针内固定术
279	D11(创伤3)	2022-11-21	2022-11-29	3301691	罗遂勤	男	66Y	胫骨骨折	前列腺结石;下肢静脉血栓形成;前列腺增生;膝关节十字韧带扭伤;膝关节副韧带扭伤	治愈	王振文	水小龙	218241	膝后十字韧带重建术;胫骨骨折切开复位螺钉内固定术
280	D11(创伤3)	2022-11-05	2022-12-03	3302836	叶礼祝	男	60Y	股骨干骨折	多发性肋骨骨折;臂丛神经损伤;前臂特指浅表损伤;前臂尺神经损伤;前臂正中神经损伤;锁骨骨折;尺骨骨折;肱骨外髁骨折;耻骨骨折;耻骨联合扭伤;髋臼骨折;腹水;下肢静脉血栓形成	治愈	王振文	水小龙	218241	股骨骨折切开复位钢板内固定术;股骨内固定物取出术;锁骨骨折切开复位钢板内固定术
281	D11(创伤3)	2022-11-26	2022-12-05	3303812	黄翠兰	女	75Y	股骨粗隆间骨折	下肢静脉血栓形成	治愈	王振文	水小龙	218241	筋膜缝合术;股骨骨折闭合复位髓内针内固定术
282	D11(创伤3)	2022-11-27	2022-12-05	3303824	赵燕妹	女	55Y	双踝骨折	膝关节副韧带扭伤;耻骨骨折;骶骨骨折;髋臼骨折;腰骶椎间盘突出;腰椎退行性病变;原发性双侧膝关节病;肾结石;肾错构瘤;胆囊息肉;脂肪肝;下肢静脉血栓形成	治愈	洪建军	卢晓郎	卢迪	副韧带修补术;距腓韧带缝合修补术;踝关节骨折切开复位钢板内固定术
283	D11(创伤3)	2022-12-03	2022-12-13	3307024	张昌汉	男	55Y	髋臼骨折	高血压病;下肢静脉血栓形成;脂肪肝;肾结石;前列腺结石	治愈	洪建军	余洋	郑亦静	髋骨骨折切开复位钢板内固定术
284	D11(创伤3)	2022-12-07	2022-12-17	3308374	胡明华	男	53Y	髌骨骨折	原发性单侧膝关节病;肝血管瘤;多发性肝囊肿;胆囊息肉;下肢静脉血栓形成;肺特指疾患;股四头肌腱断裂	治愈	余可和	余可和	卢迪	髌骨骨折切开复位张力带钢丝内固定术;股四头肌缝合术
285	D11(创伤3)	2022-12-07	2022-12-17	3308399	董进花	女	72Y	股骨颈骨折	脑梗死后遗症;大脑中动脉闭塞;偏瘫;下肢静脉血栓形成;高血压病;2型糖尿病性周围神经病;房性早搏;腰椎退行性病变;慢性乙型病毒性肝炎;肾积水伴肾结石;肾萎缩;后天性肾囊肿;原发性双侧膝关节病;吞咽困难;言语障碍;颈内动脉闭塞;椎动脉狭窄	治愈	余可和	余可和	卢迪	人工股骨头置换术
286	D11(创伤3)	2022-12-08	2022-12-20	3309757	王仕叶	女	65Y	股骨颈骨折	下肢静脉血栓形成;肾结石;肾错构瘤	治愈	王振文	水小龙	218241	陶瓷-聚乙烯髋关节置换;全髋关节置换术
287	D11(创伤3)	2022-12-08	2022-12-25	3311633	李本良	男	70Y	胫骨骨干骨折	闭合性胫骨平台骨折;髋臼骨折;下肢静脉血栓形成;高血压病;痛风;先天性膝滑膜骨软骨瘤病;甲状腺钙化;后天性肾囊肿;肾结石;胸腔积液;心包积液	治愈	王振文	水小龙	218241	胫骨人工骨植骨术;胫骨骨折切开复位钢板内固定术
288	D11(创伤3)	2022-12-17	2022-12-26	3311982	吴仕品	男	88Y	股骨粗隆间骨折	下肢静脉血栓形成;前列腺增生;胸腔积液;肾结石;后天性肾囊肿;前列腺结石	治愈	潘骏	潘骏	金海东	股骨骨折闭合复位髓内针内固定术
289	D11(创伤3)	2022-12-24	2022-12-27	3312687	林乐清	女	101Y	股骨粗隆间骨折	高血压病;下肢静脉血栓形成;肺炎性肿块;冠状动脉粥样硬化;胸腔积液;主动脉钙化;陈旧性肋骨骨折	未愈	余可和	余可和	卢迪
290	D11(创伤3)	2022-12-16	2022-12-29	3313433	裘定竹	女	80Y	股骨粗隆间骨折	多发性脑梗死;脱髓鞘性白质脑病;老年性脑萎缩;脑缺血灶;糜烂性胃炎;肝回声不均;后天性肾囊肿;下肢静脉血栓形成;颈动脉硬化	治愈	余可和	余可和	卢迪	股骨骨折闭合复位髓内针内固定术
291	D12(手外)	2022-01-25	2022-02-13	3193798	潘笃富	男	65Y	创伤性骨筋膜室综合征	股动脉狭窄;急性失血性贫血;创伤性股动脉血栓形成;下肢深静脉血栓形成;后天性肾囊肿;创伤性胸腔积液;前列腺钙化灶;脊椎退行性病变;胫腓骨干骨折;腹股沟淋巴结肿大;乙型肝炎小三阳;低钠血症;骨盆骨折;开放性髋损伤;股动脉闭塞	治愈	李志杰	褚庭纲	周宗伟	下腔静脉滤器置入术;股静脉穿刺术;残端皮肤修整术;大腿离断术;皮肤和皮下坏死组织切除清创术;创面负压封闭引流[VSD]
292	D12(手外)	2022-02-24	2022-03-14	3202629	庄千高	男	42Y	耻骨骨折	创伤性耻骨联合破裂;糖尿病;下肢静脉血栓形成;脂肪肝;股骨干骨折	好转	王振文	水小龙	何自力	股骨骨折切开复位髓内针内固定术;骨盆骨折切开复位螺钉内固定术
293	D12(手外)	2022-06-02	2022-06-09	3234398	陈德福	男	81Y	腰椎骨折	脂肪肝;下肢静脉血栓形成;骨折治疗后恢复期;高血压病;胸椎骨折;前列腺结石	好转	林焱	武垚森	武垚森	腰椎骨折球囊扩张成形术;胸椎骨折球囊扩张成形术
294	D12(手外)	2022-05-04	2022-06-15	3236647	彭振友	男	69Y	手术后切口感染	开放性多发性足骨折;下肢动脉硬化闭塞症;高血压病;下肢动脉血栓形成;糖尿病	治愈	虞庆	王安远	王安远	趾骨死骨去除术;趾骨截骨术;残端皮肤修整术;皮肤和皮下坏死组织切除清创术;股动脉穿刺术;髂动脉造影;下肢动脉造影;下肢动脉导管溶栓;股动脉球囊扩张成形术;股动脉支架置入术;创面负压封闭引流[VSD]
295	D12(手外)	2022-08-09	2022-09-30	3278975	吴永造	男	64Y	创伤后伤口感染	腹水;下肢动脉粥样硬化;周围性面神经麻痹;下肢静脉血栓形成;多处挫伤;多发性肋骨骨折;创伤性胸腔积液;肺挫伤;阴囊挫伤	治愈	李志杰	林大木	218324	创面负压封闭引流[VSD];皮肤和皮下坏死组织切除清创术;皮肤缝合术;中厚皮片移植术
296	D13(手外)	2022-04-14	2022-04-24	3217376	范美珠	女	71Y	股骨颈骨折	下肢动脉粥样硬化;下肢静脉血栓形成;高血压Ⅱ期;再生障碍性贫血;胸腔积液;肺部感染	好转	黄俊武	王鉴顺	蔡乐益	髋关节滑膜切除术;人工股骨头置换术
297	D13(手外)	2022-07-18	2022-07-26	3253015	邱香黄	女	76Y	肘关节脱位	糖尿病;脂肪肝;肾结石;下肢动脉粥样硬化;下肢静脉血栓形成;Ⅰ度房室传导阻滞;肱骨内髁骨折;鹰嘴骨折;皮肤裂伤	治愈	虞庆	王安远	王安远	韧带修补术;肘关节脱位切开复位内固定术
298	D13(手外)	2022-09-03	2022-09-06	3269965	蒋福明	男	56Y	胫腓骨下端骨折	皮肤裂伤;特指颈椎骨折;肾结石;前列腺结石;淋巴结钙化;肺气肿;下肢静脉血栓形成;骨质疏松;椎管内炎性肿物;梅毒;脂肪肝;心动过缓	好转	蒋良福	蒋良福	褚庭纲
299	D13(手外)	2022-09-11	2022-10-12	3282794	董美桂	女	57Y	开放性尺骨桡骨骨干骨折	腕关节脱位;前臂尺动脉损伤;前臂正中神经断裂;前臂尺神经断裂;前臂肌肉和肌腱损伤;下肢静脉血栓形成;开放性桡骨下端骨折;尺桡关节脱位	治愈	陈星隆	吴志鹏	林康	残端修正术;创面负压封闭引流[VSD];尺桡关节脱位切开复位术;尺骨骨折切开复位螺钉内固定术;桡骨骨折切开复位螺钉内固定术;前臂肌腱缝合术;尺神经缝合术;正中神经松解术;动脉修补术;皮肤和皮下组织非切除性清创
300	D13(手外)	2022-09-24	2022-10-26	3288763	赵典媚	男	70Y	下肢浅表损伤	胸腔积液;心功能不全;下肢皮肤感染;高血压病;2型糖尿病;类风湿性结节;脂肪肝;下肢静脉血栓形成;多发性肋骨骨折;脑卒中后遗症;前列腺增生	治愈	闫合德	陈一衡	陈一衡	全厚皮片移植术;皮肤和皮下组织非切除性清创;创面负压封闭引流[VSD]
301	D14(脊柱)	2021-12-29	2022-01-06	3179653	吴春兰	女	67Y	腰椎骨折	下肢动脉粥样硬化;下肢静脉血栓形成;脂肪肝;骨质疏松	治愈	倪文飞	武垚森	武垚森	腰椎骨折球囊扩张成形术
302	D14(脊柱)	2022-01-08	2022-01-22	3185159	王信炉	男	77Y	第一颈椎骨折	颈部脊髓损伤;下肢静脉血栓形成;后天性肾囊肿	治愈	黄其杉	林仲可	朱思品	颅骨牵引
303	D14(脊柱)	2022-01-29	2022-02-03	3189512	陈运连	男	54Y	腰椎骨折	下肢静脉血栓形成;脂肪肝;胆囊胆固醇沉着症;肾超声检查异常	治愈	徐晖	徐晖	陈教想	腰椎骨折球囊扩张成形术
304	D14(脊柱)	2022-01-25	2022-02-05	3189953	王一巧	女	81Y	多发性胸椎骨折	心房颤动;下肢动脉粥样硬化;下腔静脉血栓形成;2型糖尿病;高血压病;房性早搏	治愈	徐晖	王胜	王胜	胸椎骨折球囊扩张成形术
305	D14(脊柱)	2022-01-29	2022-02-06	3190572	周上彪	男	49Y	脊髓损伤	腰椎骨折;肋骨骨折;肺部感染;鼻咽恶性肿瘤;下肢静脉血栓形成	好转	徐晖	王胜	王胜	椎弓根钉内固定术;脊椎骨折复位术
306	D14(脊柱)	2022-02-10	2022-02-14	3194215	胡玉钗	女	86Y	骨质疏松伴病理性骨折	慢性阻塞性肺病;高血压性心脏病;心房颤动;心功能不全;脑梗死后遗症;慢性肾衰竭;食管裂孔疝;后天性肾囊肿;下肢动脉粥样硬化;下肢静脉血栓形成	好转	徐晖	徐晖	陈教想
307	D14(脊柱)	2022-03-12	2022-03-19	3204271	张彩眉	女	70Y	病理性骨折	高血压病;糖尿病;冠状动脉粥样硬化性心脏病;冠状动脉支架植入后状态;多发性骨髓瘤;下肢动脉粥样硬化;下肢静脉血栓形成;脂肪肝;胆囊息肉	治愈	黄其杉	黄其杉	陈教想	腰椎骨折球囊扩张成形术
308	D14(脊柱)	2022-04-13	2022-04-29	3219491	吴炳龙	男	74Y	腰椎骨折	肝囊肿;骨质疏松;下肢动脉粥样硬化;下肢静脉血栓形成;多发性骨髓瘤	好转	黄其杉	黄其杉	陈教想	腰椎骨折球囊扩张成形术
309	D14(脊柱)	2022-04-14	2022-05-02	3220310	郑志翠	女	65Y	多发性胸椎骨折	下肢静脉血栓形成;后天性肾囊肿;开放性肺特指损伤;脂肪肝;糖尿病;原发性双侧膝关节病	治愈	倪文飞	林仲可	周玉龙	椎弓根钉内固定术;脊椎骨折复位术
310	D14(脊柱)	2022-05-19	2022-05-24	3228397	林戴弟	女	83Y	多发性胸椎骨折	下肢动脉粥样硬化;骨质疏松;胆总管扩张;下肢深静脉血栓形成	治愈	黄其杉	黄其杉	陈教想	胸椎骨折球囊扩张成形术
311	D14(脊柱)	2022-05-26	2022-06-04	3232361	胡金钗	女	79Y	腰椎骨折	胆囊结石;下肢动脉粥样硬化;骨质疏松;下肢静脉血栓形成	治愈	黄其杉	窦海成	窦海成	腰椎骨折球囊扩张成形术
312	D14(脊柱)	2022-06-05	2022-06-14	3236165	赵世格	男	59Y	腰椎骨折	脑恶性肿瘤个人史;创伤性肾周血肿;骨质疏松;前列腺结石;前列腺增生;脂肪肝;下肢静脉血栓形成	治愈	徐晖	盛孙仁	盛孙仁	腰椎骨折球囊扩张成形术
313	D14(脊柱)	2022-06-13	2022-06-29	3241838	郑美连	女	68Y	多发性腰椎骨折	下肢动脉粥样硬化;脊椎前移;骨质疏松;下肢静脉血栓形成;肺结节	治愈	徐晖	盛孙仁	盛孙仁	经皮穿刺脊柱后凸成形术
314	D14(脊柱)	2022-06-25	2022-07-02	3242824	高茶英	女	76Y	骨质疏松伴病理性骨折	颈椎椎管狭窄;高血压病;下肢动脉粥样硬化;肾结石;腰椎间盘突出;下肢静脉血栓形成;后天性肾囊肿;颈椎间盘突出	治愈	徐晖	盛孙仁	盛孙仁	腰椎骨折球囊扩张成形术
315	D14(脊柱)	2022-06-21	2022-07-02	3242967	杨素芬	女	76Y	腰椎骨折	特指身体结构诊断性影像检查异常所见;躯干部血管瘤;脂肪肝;抑郁症;2型糖尿病;陈旧性肺结核;下肢动脉粥样硬化;下肢静脉血栓形成;后天性肾囊肿;腹泻;陈旧性胸椎骨折	治愈	倪文飞	田乃锋	周玉龙	腰椎骨折球囊扩张成形术
316	D14(脊柱)	2022-07-02	2022-07-09	3245764	郑显秋	女	74Y	胸椎骨折	脂肪肝;后天性肾囊肿;下肢动脉粥样硬化;下肢静脉血栓形成	治愈	黄其杉	窦海成	窦海成	经皮穿刺脊柱后凸成形术
317	D14(脊柱)	2022-06-27	2022-07-11	3246711	曹绪明	男	50Y	腰部脊髓特指损伤	腰椎骨折;创伤性截瘫;肺部感染;头部外伤;特指手术后状态;下肢静脉血栓形成;肝囊肿	好转	黄其杉	窦海成	窦海成	椎管减压术;后入路腰椎融合术;腰椎植骨术;脊椎骨折复位术;椎弓根钉内固定术
318	D14(脊柱)	2022-07-16	2022-07-23	3251587	程爱弟	女	70Y	病理性骨折	陈旧性腰椎骨折;陈旧性胸椎骨折;下肢动脉粥样硬化;下肢静脉血栓形成	治愈	黄其杉	窦海成	窦海成	经皮穿刺脊柱后凸成形术
319	D14(脊柱)	2022-07-18	2022-08-01	3255547	金兰珠	女	72Y	颈部脊髓损伤	下肢静脉血栓形成;后天性肾囊肿;下肢动脉粥样硬化;颈椎关节强硬;第二颈椎骨折;肾钙化	治愈	黄其杉	窦海成	窦海成	前入路颈椎融合术;前入路颈椎间盘切除术
320	D14(脊柱)	2022-07-23	2022-08-07	3257914	黄志姑	女	80Y	骨质疏松伴病理性骨折	主动脉瓣疾患;主动脉瓣关闭不全;二尖瓣关闭不全;脂肪肝;下肢动脉粥样硬化;下肢静脉血栓形成;心功能不全	好转	徐晖	盛孙仁	盛孙仁	胸椎骨折球囊扩张成形术
321	D14(脊柱)	2022-09-03	2022-09-26	3277236	许彩香	女	80Y	脊椎前移	腰椎退行性病变;脑萎缩;肺部感染;心包积液;门静脉高压;后天性肾囊肿;下肢动脉粥样硬化;下肢静脉血栓形成;病理性骨折;高血压病;肝硬化;多发性脑梗死;胸腔积液;胆囊结石;胸椎退行性病变	治愈	黄其杉	黄其杉	许聪	椎管减压术;椎弓根钉内固定术;脊椎骨折复位术;后入路腰椎融合术;腰椎植骨术;腰椎椎板切除减压术
322	D14(脊柱)	2022-09-27	2022-10-04	3280421	吴美兰	女	67Y	多发性腰椎骨折	骨质疏松;脂肪肝;下肢静脉血栓形成	治愈	倪文飞	盛孙仁	盛孙仁	腰椎骨折球囊扩张成形术
323	D14(脊柱)	2022-10-06	2022-10-11	3282379	张志强	男	50Y	腰椎骨折	后天性肾囊肿;前列腺增生;前列腺囊肿;腰椎椎管狭窄;胫骨下端骨折;下肢动脉粥样硬化;下肢静脉血栓形成	治愈	黄其杉	黄其杉	许聪	脊椎骨折复位术;椎弓根钉内固定术
324	D14(脊柱)	2022-10-06	2022-10-15	3283935	卓高潮	男	49Y	胸椎骨折	胸部脊髓特指损伤;踝挫伤;多发性肋骨骨折;下肢静脉血栓形成;前列腺结石;胸腔积液	治愈	徐晖	王胜	窦海成	椎弓根钉内固定术;脊椎骨折复位术
325	D14(脊柱)	2022-10-11	2022-10-18	3285217	李玉梅	女	78Y	胸椎骨折	腰椎退行性病变;腰椎间盘突出;脂肪肝;胆囊结石;下肢静脉血栓形成	好转	黄其杉	黄其杉	许聪	胸椎骨折球囊扩张成形术
326	D14(脊柱)	2022-10-11	2022-10-18	3285228	罗珠杏	女	82Y	骨质疏松伴病理性骨折	胸椎骨折;陈旧性腰椎骨折;特指手术后状态;腰椎间盘突出;下肢动脉粥样硬化;下肢静脉血栓形成;脂肪肝;肾结石;后天性肾囊肿	治愈	徐晖	田乃锋	田乃锋	胸椎骨折球囊扩张成形术
327	D14(脊柱)	2022-10-24	2022-10-26	3288689	叶天香	女	89Y	多发性腰椎骨折	骨质疏松;腰椎间盘突出;脊柱侧弯;高血压病;脂肪肝;胆囊结石;后天性肾囊肿;下肢动脉粥样硬化;下肢静脉血栓形成;肺纤维化	好转	徐晖	王胜	窦海成
328	D14(脊柱)	2022-10-26	2022-10-30	3290125	蒋永和	男	72Y	脊柱继发恶性肿瘤	肿瘤性病理性骨折;骨质疏松;腰椎椎管狭窄;腰椎滑脱;脊柱侧弯;肺恶性肿瘤;肺纤维化;前列腺结石;下肢静脉血栓形成	未愈	徐晖	王胜	窦海成
329	D14(脊柱)	2022-10-25	2022-11-06	3292768	潘笋芽	女	74Y	病理性骨折	腰椎间盘突出;下肢静脉血栓形成;脂肪肝;胆囊结石;后天性肾囊肿;腰椎椎管狭窄	治愈	徐晖	田乃锋	田乃锋	金属脊椎融合物置入术;2-3块椎骨融合;后入路腰椎融合术;胸椎骨折球囊扩张成形术
330	D14(脊柱)	2022-10-06	2022-11-12	3295140	刘龙光	男	63Y	颈部脊髓损伤	肺部感染;胸腔积液;后天性肾囊肿;下肢静脉血栓形成;创伤性截瘫;颈椎骨折;颈椎间盘突出;颈椎椎管狭窄	好转	黄其杉	许聪	许聪	前入路颈椎间盘切除术;前入路颈椎融合术;椎弓根钉内固定术;颈椎后路单开门椎管减压术;金属脊椎融合物置入术;2-3块椎骨融合
331	D14(脊柱)	2022-11-03	2022-11-14	3295890	泮兰芬	女	68Y	腰椎骨折	脂肪肝;慢性上颌窦炎;后天性肾囊肿;胸椎骨折;创伤性胸腔积液;肺挫伤;下肢静脉血栓形成	治愈	徐晖	田乃锋	田乃锋	2-3块椎骨融合;后入路腰椎融合术;胸椎骨折球囊扩张成形术;金属脊椎融合物置入术
332	D14(脊柱)	2022-11-11	2022-11-17	3297156	李宝钗	女	86Y	胸椎骨折	后天性肾囊肿;肾结石;高血压病;下肢动脉粥样硬化;下肢静脉血栓形成;肝囊肿;脊椎前移	治愈	徐晖	田乃锋	田乃锋	胸椎骨折球囊扩张成形术
333	D14(脊柱)	2022-11-12	2022-11-23	3299428	陈永波	男	54Y	多发性胸椎骨折	肺挫伤;皮肤挫伤;2型糖尿病;肾结石;下肢动脉粥样硬化;下肢静脉血栓形成;腰椎骨折;多发性肋骨骨折;肺炎;创伤性胸腔积液	好转	徐晖	王胜	窦海成	胸椎骨折球囊扩张成形术;腰椎植骨术;胸椎植骨术;椎弓根钉内固定术;脊椎骨折复位术
334	D14(脊柱)	2022-12-05	2022-12-10	3305837	孙凤香	女	83Y	腰椎骨折	骨质疏松;脂肪肝;后天性肾囊肿;下肢静脉血栓形成;腰椎退行性病变	治愈	徐晖	许聪	许聪	腰椎骨折球囊扩张成形术
335	D14(脊柱)	2022-12-10	2022-12-20	3309865	金学英	女	72Y	骨质疏松伴病理性骨折	腰椎间盘突出;陈旧性胸椎骨折;高血压病;特指手术后状态;人工膝关节;下肢静脉血栓形成;脂肪肝;胆囊肿;胆囊结石;多发性肝囊肿	治愈	徐晖	许聪	许聪	腰椎骨折球囊扩张成形术
336	D14(脊柱)	2022-12-15	2022-12-24	3311286	叶松妹	女	81Y	腰椎骨折	高血压病;肝回声不均;下肢静脉血栓形成	治愈	倪文飞	窦海成	窦海成	经皮穿刺脊柱后凸成形术
337	D14(脊柱)	2022-12-10	2022-12-24	3311300	金飞华	女	50Y	腰椎骨折	肝回声不均;下肢静脉血栓形成	治愈	倪文飞	窦海成	窦海成	椎弓根钉内固定术;脊椎骨折复位术
338	D14(脊柱)	2022-12-19	2022-12-27	3312500	胡秀媚	女	67Y	病理性骨折	高血压病;下肢静脉血栓形成;脂肪肝	好转	倪文飞	窦海成	窦海成	经皮穿刺脊柱后凸成形术
339	D15颈椎外科、腰椎外科	2022-01-24	2022-01-30	3187924	吴志标	男	87Y	骨质疏松伴病理性骨折	下肢动脉粥样硬化;主动脉钙化;腰椎骨折;肝钙化灶;脑血栓后遗症;高血压病	好转	毛方敏	田乃锋	田乃锋	腰椎骨折球囊扩张成形术
340	D15颈椎外科、腰椎外科	2022-01-27	2022-01-31	3188297	周凤香	女	71Y	胸椎骨折	下肢动脉粥样硬化;下肢静脉血栓形成;胸腔积液	治愈	毛方敏	田乃锋	田乃锋	胸椎骨折球囊扩张成形术
341	D15颈椎外科、腰椎外科	2022-03-02	2022-03-13	3202490	张菊娒	女	65Y	腰椎骨折	后天性肾囊肿;下肢静脉血栓形成;下肢动脉粥样硬化;腰椎间盘突出;后天性单侧指缺损;特指手术后状态;骨质疏松	治愈	王向阳	武垚森	武垚森	脊椎骨折修补术;腰椎骨折球囊扩张成形术;椎弓根钉内固定术
342	D15颈椎外科、腰椎外科	2022-04-24	2022-04-28	3218912	林玉莲	女	76Y	骨质疏松伴病理性骨折	下肢静脉血栓形成;糖尿病;下肢动脉粥样硬化;腰椎间盘突出;胆囊结石;腰椎骨折	治愈	林焱	林焱	许聪	腰椎骨折球囊扩张成形术
343	D15颈椎外科、腰椎外科	2022-05-01	2022-05-08	3222364	潘美花	女	85Y	骨质疏松伴病理性骨折	心房颤动;扩张型心肌病;高血压病;心功能Ⅳ级;特指手术后状态;腰椎骨折;胸椎骨折;下肢静脉血栓形成	好转	王向阳	武垚森	武垚森
344	D15颈椎外科、腰椎外科	2022-05-30	2022-06-06	3233122	刘爱娇	女	87Y	腰椎骨折	先天性静脉扩张;腰椎退行性病变;腰椎椎管狭窄;颈动脉硬化;下肢动脉粥样硬化;心房颤动;陈旧性胸椎骨折;骨质疏松;下肢静脉血栓形成;特指手术后状态	好转	王向阳	王向阳	林仲可	腰椎骨折球囊扩张成形术
345	D15颈椎外科、腰椎外科	2022-06-05	2022-06-12	3235464	徐香珠	女	68Y	胸椎骨折	下肢动脉粥样硬化;高血压病;骨质疏松;下肢静脉血栓形成	治愈	王向阳	王向阳	林仲可	胸椎骨折球囊扩张成形术
346	D15颈椎外科、腰椎外科	2022-06-04	2022-06-18	3237550	陈碎葱	女	66Y	颈椎骨折	高血压病;下肢静脉血栓形成	治愈	毛方敏	毛方敏	许聪	前入路颈椎间盘切除术;前入路颈椎融合术;颈椎植骨术
347	D15颈椎外科、腰椎外科	2022-06-15	2022-06-21	3238713	吴乃孙	女	61Y	腰椎骨折	特指心律失常;骨质疏松;下肢静脉血栓形成	治愈	王向阳	王向阳	林仲可	腰椎骨折球囊扩张成形术
348	D15颈椎外科、腰椎外科	2022-06-13	2022-06-27	3240879	徐顺柱	男	61Y	颈部脊髓损伤	膝关节十字韧带扭伤;膝关节副韧带扭伤;闭合性胫骨平台骨折;先天性静脉扩张;颈椎间盘突出;颈椎后纵韧带骨化;颈椎椎管狭窄;膝关节积液;外侧半月板后角损伤;内侧半月板损伤;慢性上颌窦炎;高血压病;下肢静脉血栓形成;特指手术后状态	好转	林焱	武垚森	武垚森	颈椎后路单开门椎管减压术;椎管成形术
349	D15颈椎外科、腰椎外科	2022-06-25	2022-06-29	3241798	黄锦华	男	54Y	肺结核	乙型肝炎后肝硬化失代偿期;2型糖尿病;脊髓损伤后遗症;胸椎骨折;病理性骨折;褥疮;下肢静脉血栓形成;截瘫;脊髓受压	好转	王向阳	王向阳	林仲可
350	D15颈椎外科、腰椎外科	2022-06-19	2022-07-05	3244235	黄冬英	女	63Y	颈部脊髓损伤	下腔静脉血栓形成;肾结石;特指手术后状态;心动过缓;肺部感染;胸腔积液;膀胱结石;乳腺恶性肿瘤;颈椎间盘突出;颈椎骨折	好转	王向阳	王向阳	林仲可	前入路颈椎间盘切除术;前入路颈椎融合术;颈椎植骨术
351	D15颈椎外科、腰椎外科	2022-06-26	2022-07-09	3245904	董碎波	男	68Y	颈部脊髓损伤	下肢动脉粥样硬化;颈椎骨折;下肢静脉血栓形成;后天性肾囊肿;前列腺增生	好转	林焱	林焱	武垚森	椎管成形术;颈椎后路单开门椎管减压术
352	D15颈椎外科、腰椎外科	2022-07-06	2022-07-10	3246199	郑陈义	男	59Y	胸椎骨折	面部挫伤;鼻骨骨折;腰椎间盘突出;眶骨骨折;下肢静脉血栓形成;后天性肾囊肿	好转	林焱	林焱	武垚森
353	D15颈椎外科、腰椎外科	2022-06-29	2022-07-12	3247007	章灶根	男	85Y	腰椎骨折	脊椎前移;高血压病;下肢深静脉血栓形成;下肢动脉粥样硬化;肝囊肿;单纯性肾囊肿;腰椎椎管狭窄	治愈	毛方敏	毛方敏	许聪	腰椎骨折球囊扩张成形术
354	D15颈椎外科、腰椎外科	2022-07-09	2022-07-14	3247974	朱金姑	女	66Y	腰椎骨折	下肢动脉粥样硬化;下肢静脉血栓形成;子宫切除术后状态;脂肪肝	治愈	王向阳	王向阳	林仲可	腰椎骨折球囊扩张成形术
355	D15颈椎外科、腰椎外科	2022-07-30	2022-08-04	3256780	谢碎凤	女	79Y	多发性胸椎骨折	胸椎退行性病变;陈旧性胸椎骨折;下肢静脉血栓形成;多发性肝囊肿;肝回声不均;胆囊息肉;下肢动脉粥样硬化	治愈	倪文飞	田乃锋	田乃锋	胸椎骨折球囊扩张成形术
356	D15颈椎外科、腰椎外科	2022-08-03	2022-08-09	3258657	杨园香	女	66Y	胸椎骨折	脂肪肝;肾结石;腰椎退行性病变;胸腔积液;肺部感染;高血压病;下肢静脉血栓形成;小隐静脉曲张	治愈	倪文飞	田乃锋	田乃锋	胸椎骨折球囊扩张成形术
357	D15颈椎外科、腰椎外科	2022-07-29	2022-08-14	3260718	张碎年	男	44Y	第一颈椎骨折	肺挫伤;颞骨骨折;肌腱和肌肉损伤;下肢静脉血栓形成;颧骨骨折;特指手术后状态;颈部脊髓损伤;创伤性硬膜外血肿;脑疝	治愈	王向阳	王向阳	林仲可	颈椎植骨术;后入路颈椎融合术;脊椎骨折复位术
358	D15颈椎外科、腰椎外科	2022-08-15	2022-09-03	3268515	王兆荣	女	78Y	脊柱良性肿瘤	腰椎骨折;下肢静脉血栓形成;脊髓损伤;胸椎骨折;下肢动脉粥样硬化;特指主动脉瓣疾患;心功能不全	治愈	毛方敏	许聪	许聪	脊椎骨折复位术;椎弓根钉内固定术;股静脉穿刺术;下腔静脉滤器置入术;胸椎病损切除术
359	D15颈椎外科、腰椎外科	2022-08-26	2022-09-04	3269027	林张女	女	76Y	胸椎骨折	下肢静脉血栓形成;下肢动脉粥样硬化;肝钙化灶;高血压病	治愈	林焱	林仲可	林仲可	胸椎骨折球囊扩张成形术
360	D15颈椎外科、腰椎外科	2022-09-09	2022-09-25	3276695	杨满茶	女	76Y	胸椎骨折	肝钙化灶;后天性肾囊肿;下肢动脉粥样硬化;下肢静脉血栓形成;强直性脊柱炎;肺部感染;胸腔积液;肾结石;肾钙化	治愈	王向阳	王向阳	陈教想	椎弓根钉内固定术;脊椎骨折复位术
361	D15颈椎外科、腰椎外科	2022-09-12	2022-09-30	3279426	滕云青	男	50Y	颈部脊髓损伤	肺挫伤;创伤性胸腔积液;肺部感染;鼻骨骨折;颧骨骨折;多囊肝;下肢动脉粥样硬化;下肢静脉血栓形成;截瘫;颈椎骨折;颈椎椎管狭窄;颈椎间盘突出;泌尿道感染	好转	王向阳	王向阳	陈教想	颈椎植骨术;前入路颈椎间盘切除术;前入路颈椎融合术
362	D15颈椎外科、腰椎外科	2022-06-17	2022-10-08	3281363	郑秀莲	女	81Y	皮肤和皮下组织特指局部感染	阵发性房性心动过速;具有心脏起搏器;下肢静脉血栓形成;下肢动脉粥样硬化;颈动脉硬化;胸腔积液;特指手术后状态;脊柱压缩性骨折;房性早搏	治愈	林焱	林仲可	林仲可	皮肤和皮下组织切开引流术;皮肤和皮下组织非切除性清创;皮肤和皮下坏死组织切除清创术
363	D15颈椎外科、腰椎外科	2022-11-06	2022-11-13	3295339	周崇翠	女	80Y	腰椎骨折	骨质疏松;肺结节;下肢动脉粥样硬化;下肢静脉血栓形成;肝囊肿;特指主动脉瓣疾患;二尖瓣返流;心功能不全	治愈	林焱	林仲可	林仲可	腰椎骨折球囊扩张成形术
364	D15颈椎外科、腰椎外科	2022-11-11	2022-11-26	3300227	周进满	男	76Y	颈部脊髓损伤	肋骨骨折;骨质疏松;腰椎椎管狭窄;下肢动脉粥样硬化;下肢静脉血栓形成;肺气肿;创伤性胸腔积液;完全性右束支传导阻滞;高血压病;颈椎脱位;颈椎骨折;多发性胸椎骨折	好转	王向阳	王向阳	陈教想	颈椎间盘切除伴半椎板切除术;颈椎植骨术;颅骨牵引;后入路颈椎融合术
365	D15颈椎外科、腰椎外科	2022-11-26	2022-11-30	3302248	王国弟	女	80Y	骨质疏松伴病理性骨折	陈旧性腰椎骨折;陈旧性胸椎骨折;下肢静脉血栓形成;胆总管扩张	好转	王向阳	陈教想	陈教想	腰椎骨折球囊扩张成形术
366	D15颈椎外科、腰椎外科	2022-11-05	2022-12-22	3310735	杨永成	男	66Y	颈椎恶性肿瘤	下肢深静脉血栓形成;颈椎间盘突出;脂肪肝;肾错构瘤;前列腺增生;病理性骨折	好转	王向阳	王向阳	王向阳	颈椎椎板切除减压术;椎弓根钉内固定术;前入路颈椎融合术;椎骨活检术
367	D15颈椎外科、腰椎外科	2022-12-25	2022-12-29	3313453	徐娒儿	女	77Y	骨质疏松伴病理性骨折	下肢静脉血栓形成;胸腔积液;胸椎骨折;肺部感染;肾结石;多发性肝囊肿;高血压病;陈旧性腰椎骨折	治愈	林焱	林焱	陈教想	胸椎骨折球囊扩张成形术
368	F02急诊创伤	2021-12-14	2022-01-05	3179542	徐红迪	女	78Y	创伤性蛛网膜下腔出血	鼻骨骨折;特指手术后状态;肝囊肿;肺结节;下肢静脉血栓形成;下肢动脉粥样硬化;面部裂伤;耻骨骨折;髂骨骨折;骨盆骨折;创伤性胸腔积液;锁骨骨折;多发性肋骨骨折	好转	李永领	李永领	李永领
369	F02急诊创伤	2022-03-07	2022-03-12	3202051	周美凤	女	57Y	多发性肋骨骨折	肱骨骨折;上颌骨骨折;慢性鼻窦炎;肺挫伤;创伤性皮下气肿;皮肤挫伤;低钾血症;糖尿病;下肢静脉血栓形成	好转	林露阳	项洪武	717560
370	F02急诊创伤	2022-03-03	2022-03-13	3202451	李恩光	男	74Y	创伤性硬膜下出血	创伤性蛛网膜下腔出血;外伤性硬脑膜下积液;颧骨骨折;头皮血肿;高血压病;急性上呼吸道感染;低钠血症;低钾血症;颈动脉硬化;下肢动脉粥样硬化;脂肪肝;肾结石;腔隙性脑梗死;下肢静脉血栓形成;心室肥厚;主动脉瓣疾患;主动脉瓣关闭不全	好转	林露阳	项洪武	朱盈盈
371	F02急诊创伤	2022-03-14	2022-04-21	3216456	黄肖曦	女	25Y	肝损伤	肺挫伤;创伤性肾破裂;创伤后伤口感染;肾小管酸中毒;肺部感染;应激性溃疡;过敏性紫癜;髓质海绵肾;多发性腰椎骨折;胃损伤;下腔静脉血栓形成;创伤性胸腔积液;肋骨骨折;骨盆骨折;股骨颈骨折;股骨干骨折;腹壁疝;干燥综合征	好转	李永领	李永领	李永领	股骨骨折切开复位钢板内固定术;腹腔镜检查;肝破裂修补术;腹腔冲洗检查;腹腔镜下腹壁疝修补术
372	F02急诊创伤	2022-04-21	2022-05-17	3225811	陈爱玉	女	81Y	多发性肋骨骨折	肾衰竭;褥疮;慢性失血性贫血;2型糖尿病;多发性胸椎骨折;下肢静脉血栓形成;高血压病;创伤性胸腔积液	好转	李永领	李永领	李永领	胸腔闭式引流术
373	F02急诊创伤	2022-04-17	2022-06-01	3231378	柳文镯	男	65Y	股骨颈骨折	创伤性肝破裂;腹水;下肢静脉曲张;下肢静脉血栓形成;肾上腺出血;多发性腰椎骨折;创伤性胸腔积液;创伤性肺破裂;多发性肋骨骨折;多发性胸椎骨折;盆腔积液，女性;肾结石;下肢动脉粥样硬化;高血压病	好转	林露阳	项洪武	项洪武	髋关节滑膜切除术;肋骨骨折切开复位钢板内固定术;股静脉穿刺术;下腔静脉滤器置入术;人工股骨头置换术
374	F02急诊创伤	2022-05-16	2022-06-06	3233312	缪莲芬	女	78Y	创伤性脑出血	脑震荡;老年性脑萎缩;下肢动脉粥样硬化;下肢静脉血栓形成;耻骨骨折;下肢静脉曲张;脑室出血	治愈	林露阳	项洪武	项洪武
375	F02急诊创伤	2022-06-06	2022-07-09	3245951	李思勇	男	43Y	基底节出血	高血压病;脑疝;蛛网膜下腔出血;额骨骨折;开放性多发性损伤;前臂肌肉和肌腱损伤;多发性脑梗死;胸腔积液;泌尿道感染;下肢静脉血栓形成;肾结石;胆囊结石;肺部感染	好转	林露阳	林露阳	项洪武	硬脑膜下钻孔引流术
376	F02急诊创伤	2022-08-16	2022-09-01	3268045	林允阔	男	72Y	髋臼骨折	多发性肋骨骨折;多处挫伤;下肢静脉血栓形成;下肢动脉粥样硬化;2型糖尿病;后天性肾囊肿;腔隙性脑梗死	好转	林露阳	林露阳	项洪武	股静脉穿刺术;下肢静脉滤器置入术
377	F02急诊创伤	2022-08-04	2022-09-05	3269592	俞盛龙	男	85Y	创伤性蛛网膜下腔出血	创伤性硬膜下出血;下肢动脉粥样硬化;前列腺增生;膀胱结石;输尿管结石伴肾结石;脑挫伤;颞骨骨折;脑脊液耳漏;头部浅表损伤;肺挫伤;创伤性胸腔积液;泌尿道感染;腔隙性脑梗死;下肢深静脉血栓形成;特指腹疝	好转	林露阳	林露阳	项洪武	下腔静脉滤器置入术;股静脉穿刺术
378	F02急诊创伤	2022-11-01	2022-12-06	3304515	黄秀英	女	80Y	多发性胸椎骨折	创伤性胸腔积液;失血性休克;心包积液;胸骨骨折;高血压病;下肢动脉粥样硬化;下肢静脉血栓形成;创伤性蛛网膜下腔出血;外伤性硬脑膜下积液;头皮血肿;多发性肋骨骨折;创伤性气胸;肺部感染;肺不张;肺挫伤	好转	林露阳	项洪武	项洪武	脊椎骨折复位术;椎弓根钉内固定术
379	F03观察病房	2022-02-19	2022-03-01	3197995	郑玉珍	女	80Y	肺部感染	抑郁症;心房颤动;2型糖尿病;手术后随诊检查;特指手术后状态;肋骨骨折;后天性肾囊肿;肝囊肿;下肢静脉血栓形成;颈动脉硬化;高血压病;骨质疏松	好转	陈大庆	齐艳红	潘贤娟
380	F03观察病房	2022-04-08	2022-04-19	3215660	林曼莉	女	94Y	胃肠功能紊乱	颈动脉硬化;下肢动脉粥样硬化;多发性肝囊肿;高血压病;慢性龈炎;甲状腺结节;股骨粗隆间骨折;泌尿道感染;下肢静脉血栓形成;高血压性心脏病;后天性肾囊肿	好转	陈大庆	齐艳红	翁杰
381	F03观察病房	2022-04-18	2022-04-29	3219567	刘贵美	男	78Y	创伤性鼻中隔血肿	脑梗死;上颌骨骨折;面部挫伤;头部外伤;肺栓塞;下肢静脉血栓形成;椎动脉狭窄;肠系膜静脉血栓形成;肺不张;高血压病;凝血障碍	治愈	陈莹	陈莹	陈莹
382	F03观察病房	2022-05-10	2022-05-22	3227596	陈益女	女	79Y	肺部感染	颈动脉硬化;下肢动脉粥样硬化;厌食;后天性肾囊肿;下肢静脉血栓形成;骨质疏松;类风湿性关节炎;肝囊肿;脂肪肝;陈旧性肋骨骨折	好转	陈大庆	齐艳红	翁杰
383	F03观察病房	2022-10-27	2022-11-10	3294327	叶美妹	女	60Y	出血性脑梗死	多发性肋骨骨折;下肢静脉血栓形成;下肢动脉粥样硬化;阵发性心房纤颤;高血压病;2型糖尿病;高脂血症	好转	陈大庆	陈莹	陈莹
384	F03观察病房	2022-11-06	2022-11-12	3295163	缪彩弟	女	57Y	多发性肋骨骨折	肺部感染;膝关节病;下肢静脉血栓形成;血胸;开放性胸部损伤	好转	陈大庆	陈莹	陈莹
385	F04脑外	2021-11-20	2022-01-02	3178403	李时亮	男	72Y	创伤性脑疝	创伤性硬膜外血肿;肺不张;创伤性硬膜下出血;脑挫伤;创伤性蛛网膜下腔出血;下肢动脉粥样硬化;颅腔积气;肺部感染;创伤性胸腔积液;后天性肾囊肿;顶骨骨折;下肢静脉血栓形成;颈椎间盘突出	治愈	盛汉松	林逢春	卢相琦	颅骨切除减压术;硬脑膜外血肿清除术
386	F04脑外	2022-02-06	2022-02-14	3194132	林华敏	男	54Y	外伤后脑积水	脑挫伤;创伤性蛛网膜下腔出血;创伤性硬膜下出血;头皮血肿;腰椎骨折;肺部感染;高血压病;下肢动脉粥样硬化;下肢静脉血栓形成;前列腺增生;脂肪肝;后天性肾囊肿;骶骨骨折	好转	盛汉松	林逢春	卢相琦	脑室-腹腔分流术
387	F04脑外	2022-02-08	2022-05-10	3223040	翁学明	男	79Y	脑疝	高血压病;大脑中动脉狭窄;颈内动脉粥样硬化;多发性脑梗死;腔隙性脑梗死;胸腔积液;肺部感染;基底节出血;颈内动脉狭窄;下肢深静脉血栓形成;陈旧性肋骨骨折	好转	盛汉松	盛汉松	卢相琦	脑内血肿清除术
388	F04脑外	2022-05-10	2022-05-30	3230501	翁学明	男	79Y	基底节出血	大脑中动脉狭窄;多发性脑梗死;陈旧性肋骨骨折;锁骨骨折;肺部感染;胸腔积液;下肢静脉曲张;下肢动脉血栓形成;颈内动脉狭窄;心包积液;下肢动脉粥样硬化;颈内动脉粥样硬化;高血压病	好转	盛汉松	盛汉松	俞丽生
389	F04脑外	2022-04-09	2022-05-30	3230811	孔兰英	女	82Y	创伤性硬膜下出血	下肢动脉粥样硬化;下肢静脉血栓形成;高血压病;创伤性慢性硬膜下血肿;膝关节病;创伤性胸腔积液;多发性肋骨骨折;头皮血肿;肺挫伤;创伤性气胸;创伤性蛛网膜下腔出血;脑挫伤;肝囊肿;肺部感染;膝内侧半月板损伤	治愈	张弩	许尚虞	尹波
390	F04脑外	2022-07-06	2022-08-17	3261881	周爱先	女	66Y	创伤性硬膜下出血	高血压病;骨质疏松;胸椎骨折;静脉栓塞和血栓形成;创伤性胸腔积液;肺挫伤	好转	王怀瓯	王怀瓯	陈彦克	腰椎骨折球囊扩张成形术;硬脑膜外血肿清除术;颅骨切除减压术;经皮穿刺椎体成形术
391	F04脑外	2022-07-26	2022-08-28	3266438	徐恭瑞	男	76Y	弥漫性轴索损伤	创伤性蛛网膜下腔出血;下肢静脉血栓形成;颅腔积气;多发性颅骨骨折;头皮裂伤;肋骨骨折;创伤性胸腔积液;高血压病;肺部感染;后天性肾囊肿;颈椎退行性病变;颈椎间盘突出;颈椎骨折;下肢动脉粥样硬化;前列腺钙化灶;胸椎间盘突出;肺结节	好转	盛汉松	林逢春	卢相琦
392	F04脑外	2022-08-29	2022-09-13	3272358	王宝	男	47Y	大脑动脉血栓形成性脑梗死	颈动脉血栓形成脑梗死;多发性肋骨骨折;大脑血管动静脉畸形	治愈	尹波	尹波	李丹东	脑动脉造影;两支血管的操作;经皮颅内动脉取栓术
393	F04脑外	2022-08-02	2022-09-15	3273146	吴道金	男	50Y	颅内损伤伴长时间昏迷	脂肪肝;肝衰竭;脓毒血症;肺部感染;下肢静脉血栓形成;额骨骨折;顶骨骨折;创伤性蛛网膜下腔出血;上颌骨骨折	好转	盛汉松	林逢春	卢相琦
394	F04脑外	2022-08-21	2022-09-18	3274387	周胜霞	男	46Y	创伤性硬膜外血肿	肩胛骨骨折;肺挫伤;下肢静脉血栓形成;局灶性脑损伤;顶骨骨折;枕骨骨折;颞骨骨折;创伤性胸腔积液	好转	盛汉松	林逢春	卢相琦	硬脑膜外血肿清除术
395	F04脑外	2022-11-21	2022-12-26	3311999	张积日	男	65Y	创伤性硬膜下出血	创伤性脑疝;骨折治疗后恢复期;手术后恢复期;特指含硅[矽]粉尘肺尘埃沉着病;下肢静脉血栓形成	好转	盛汉松	林逢春	卢相琦	脑膜切开伴硬脑膜下腔血肿清除术
396	F05脑外	2021-05-19	2022-01-26	3186636	金玉益	男	77Y	创伤性硬膜下出血	创伤性硬膜外血肿;脑挫伤;创伤性蛛网膜下腔出血;颞骨骨折;肋骨骨折;肩胛骨骨折;肺结节;胸膜钙化;肺部感染;下肢动脉粥样硬化;下肢静脉血栓形成	好转	盛汉松	林逢春	卢相琦	硬脑膜外血肿清除术;脑膜切开伴硬脑膜下腔血肿清除术;颅骨切除减压术
397	F05脑外	2021-12-18	2022-02-13	3193530	余振顺	男	67Y	股骨下端骨折	下肢深静脉血栓形成;创伤性蛛网膜下腔出血;躁狂状态;肺部感染;脂肪肝;枕骨骨折;下肢动脉粥样硬化;脑挫伤	好转	盛汉松	林逢春	卢相琦	股骨骨折切开复位钢板内固定术
398	F05脑外	2022-01-23	2022-03-15	3203057	孙国民	男	69Y	创伤性脑血肿	创伤性蛛网膜下腔出血;脑挫伤;枕骨骨折;高血压病;肺部感染;肺气肿;下肢动脉粥样硬化;下肢静脉血栓形成;后天性肾囊肿;顶骨骨折	好转	张弩	周辉	尹波	脑内血肿清除术;颅骨切除减压术
399	F05脑外	2022-03-09	2022-04-18	3215246	周仙春	女	67Y	脑室出血	后交通动脉瘤破裂伴蛛网膜下腔出血;肺部感染;多发性肋骨骨折;高血压病;多发性肝囊肿;下肢静脉血栓形成;胸腔积液	好转	张弩	周辉	尹波	脑室钻孔引流术;经皮颅内动脉取栓术;下腔静脉滤器置入术;股静脉穿刺术
400	F05脑外	2022-03-14	2022-04-18	3215247	张名志	男	49Y	脑挫伤	多发性肋骨骨折;下肢静脉血栓形成;顶骨骨折;创伤性硬膜下出血;创伤性胸腔积液;头皮血肿;肺挫伤;创伤性蛛网膜下腔出血;创伤性硬膜外血肿;锁骨骨折;鼻骨骨折;颞骨骨折;颅底骨折	好转	张弩	周辉	尹波	暂时性气管切开术
401	F05脑外	2022-10-14	2022-10-26	3288751	林毅	男	58Y	创伤性蛛网膜下腔出血	弥漫性轴索损伤;头皮血肿;下肢静脉血栓形成;慢性筛窦炎;慢性蝶窦炎;慢性上颌窦炎;腕和手损伤;上消化道出血;脑干挫伤;脑挫伤;脑室出血;顶骨骨折	好转	周辉	林中啸	俞丽生	暂时性气管切开术
402	F05脑外	2022-10-15	2022-10-30	3289994	李爱香	女	66Y	创伤性蛛网膜下腔出血	膝关节病;静脉栓塞和血栓形成;脑挫伤;创伤性硬膜下出血;枕骨骨折;头皮挫伤;慢性鼻窦炎;后天性肾囊肿;支气管扩张;肺结节;多发性肋骨骨折;胸腔积液;先天性髋关节发育不良;髋关节病;股骨头无菌性坏死	好转	张弩	周辉	俞丽生	颅骨切除减压术;脑膜切开伴硬脑膜下腔血肿清除术;脑内血肿清除术
403	F05脑外	2022-11-03	2022-11-11	3294625	周海光	男	67Y	基底动脉血栓形成脑梗死	开放性足损伤;陈旧性肋骨骨折	好转	尹波	许尚虞	许尚虞	单一血管的操作;脑动脉造影;经皮颅内动脉取栓术
404	F05脑外	2022-10-05	2022-11-13	3295394	赵艮叶	女	76Y	创伤性蛛网膜下腔出血	高血压病;创伤性硬膜下出血;低钾血症;肝功能不全;下肢静脉血栓形成;下肢动脉粥样硬化;泌尿道感染;胸腔积液;肺部感染;头皮裂伤;头皮血肿;枕骨骨折;脑挫伤	好转	张弩	周辉	俞丽生	脑膜切开伴硬脑膜下腔血肿清除术;皮肤缝合术
405	F06(急ICU)	2022-02-21	2022-02-25	3196537	吴伯龙	男	88Y	胸部多处损伤	头皮开放性伤口;下肢特指深部脉管静脉炎和血栓性静脉炎;高血压病;胸部脊髓损伤;多发性颈椎骨折;多发性肋骨骨折;肩胛骨骨折;肺挫伤;血气胸;呼吸衰竭;头部外伤;头皮裂伤;头皮血肿;下肢动脉粥样硬化;多发性胸椎骨折;创伤性截瘫	未愈	胡雪珍	汤鲁明	甘一峰	深静脉穿刺;胸腔闭式引流术
406	F06(急ICU)	2022-04-06	2022-04-10	3212517	余禄秀	女	44Y	肺栓塞	脊柱压缩性骨折;缺氧缺血性脑病;慢性呼吸衰竭;下肢特指深部脉管静脉炎和血栓性静脉炎;猝死;肺部感染	死亡	孔万权	王征	王征	深静脉穿刺
407	F06(急ICU)	2022-04-07	2022-04-18	3215407	留国华	女	87Y	上消化道出血	肺部感染;心功能不全;冠状动脉粥样硬化性心脏病;结肠恶性肿瘤;窒息;高血压病;缺氧缺血性脑病;胆囊切除术后状态;特指治疗后恢复期;呼吸衰竭;取除骨折内固定装置;全身性广泛继发恶性肿瘤;下肢特指深部脉管静脉炎和血栓性静脉炎;2型糖尿病	未愈	孔万权	徐俊南	徐俊南	深静脉穿刺
408	F06(急ICU)	2021-05-31	2022-05-08	3222575	王凤媚	女	73Y	颈部脊髓损伤	下肢动脉粥样硬化;呼吸心跳骤停;心脏停搏复苏成功;高血压病;四肢瘫痪;胆囊切除术后状态;下肢静脉血栓形成;多发性肋骨骨折;颈椎骨折;呼吸衰竭;泌尿道感染;肺部感染;胸腔积液;气管食道瘘	好转	胡雪珍	胡雪珍	胡雪珍
409	F06(急ICU)	2022-04-09	2022-05-30	3230836	占月秀	女	63Y	创伤性硬膜下出血	失血性休克;颅内损伤伴长时间昏迷;弥漫性轴索损伤;多发性肋骨骨折;多处挫伤;肺挫伤;肩胛骨骨折;骨盆骨折;褥疮;泌尿道感染;消化道出血;肺部感染;下肢静脉血栓形成;颈动脉硬化;脊柱骨折	好转	孙来芳	孙来芳	潘贤娟	带蒂皮瓣修整术;下肢静脉滤器置入术
410	F06(急ICU)	2022-05-20	2022-06-11	3235205	陈爱爱	女	87Y	感染性休克	输尿管结石伴肾结石;心脏停搏复苏成功;高血压病;2型糖尿病;陈旧性股骨颈骨折;泌尿道感染;输尿管积水;肾衰竭;下肢静脉血栓形成;双眼白内障;特指手术后状态	未愈	孙来芳	汤鲁明	潘贤娟
411	F06(急ICU)	2022-06-12	2022-06-19	3237776	陈海强	男	62Y	缺氧缺血性脑病	静脉栓塞和血栓形成;心脏停搏复苏成功;高血压病;特指电解质和液体平衡紊乱;肋骨骨折;肺部感染;癫痫;特指手术后状态	好转	孔万权	王征	甘一峰
412	F06(急ICU)	2022-06-29	2022-07-06	3244819	柳文镯	男	65Y	肺部感染	肺结节;口角炎;呼吸衰竭;喉返神经疾患;肾上腺出血;肝损伤;多发性肋骨骨折;肺特指疾患;下肢动脉粥样硬化;下肢静脉血栓形成;高血压病;迷走神经损伤;多发性损伤;纵隔肿物;胸腔积液	未愈	孔万权	王征	王征
413	F06(急ICU)	2022-08-06	2022-08-22	3263975	金爱香	女	79Y	肺部感染	尺骨桡骨远端骨折;腰椎骨折;下肢静脉血栓形成;腔隙性脑梗死;老年性痴呆;2型糖尿病;心律失常;冠状动脉粥样硬化;颈动脉硬化;下肢动脉粥样硬化;股骨颈骨折	好转	孔万权	杨婷	杨婷
414	F06(急ICU)	2022-07-16	2022-09-10	3270998	章厚钦	男	82Y	多发性脑出血	创伤性硬膜外血肿;颈椎退行性病变;创伤性蛛网膜下腔出血;头皮血肿;肺部感染;呼吸衰竭;心功能不全;高血压病;下肢静脉血栓形成;出血性脑梗死;颧骨骨折;锁骨骨折;肩胛骨骨折;多发性肋骨骨折;室性早搏;后天性肾囊肿	未愈	孙来芳	王征	王征	脑内血肿清除术
415	F06(急ICU)	2022-10-17	2022-10-20	3285872	郑银凤	女	78Y	肺部感染	呼吸衰竭;股骨粗隆间骨折;高血压病;2型糖尿病;食管裂孔疝;下肢动脉硬化闭塞症;下肢静脉血栓形成	好转	孔万权	王征	潘建胜
416	F06(急ICU)	2022-11-21	2022-12-04	3303549	金阿锡	男	80Y	酒精中毒	乳酸性酸中毒;肺部感染;休克;多发性肋骨骨折;气胸;呼吸衰竭;急性肾衰竭;下肢静脉血栓形成;下肢动脉粥样硬化;酒精性肝硬变;低蛋白血症;阵发性心房纤颤	治愈	孔万权	孔万权	张烁	下肢静脉滤器置入术;下腔静脉滤器置入术;下肢静脉造影;深静脉穿刺
417	G03神经内科	2022-01-19	2022-01-25	3186377	汪德莲	女	79Y	脑梗死	特指手术后状态;锁骨下动脉粥样硬化;下肢动脉粥样硬化;颈动脉硬化;高血压病;下肢静脉血栓形成;慢性肾衰竭;泌尿道感染;脂肪肝;肝囊肿;特指肾盂积水;肾积水伴肾结石;陈旧性肋骨骨折	好转	何志勇	何志勇	李岩
418	G03神经内科	2022-07-23	2022-08-20	3262941	邹祖祥	男	85Y	脑梗死	肺部感染;特指动脉动脉粥样硬化;陈旧性股骨颈骨折;主动脉粥样硬化;心动过缓;高血压病;肺结节;脂肪肝;下肢静脉血栓形成;冠状动脉粥样硬化;下肢动脉粥样硬化;颈内动脉粥样硬化;脑动脉粥样硬化	好转	胡蓓蕾	周莉莉	朱益	下肢静脉滤器置入术;人工股骨头置换术;下肢静脉造影
419	G03神经内科	2022-12-02	2022-12-11	3306337	金爱玲	女	63Y	视神经脊髓炎	高血压病;脂肪肝;胆囊结石;颈椎间盘突出;脊柱压缩性骨折;下肢静脉血栓形成	好转	何志勇	何志勇	陈轲扬
420	G04(神内+老年)	2021-12-12	2022-01-02	3178278	沈锡春	女	71Y	后循环缺血	脑梗死;后天性肾囊肿;感音神经性耳聋;肱骨外科颈骨折;抑郁状态;动脉粥样硬化;阿尔茨海默病;2型糖尿病;焦虑状态;下肢静脉血栓形成	好转	林燕	金露	金露
421	G04(神内+老年)	2022-01-09	2022-01-18	3183784	汤秀翠	女	87Y	骨质疏松伴病理性骨折	脑梗死个人史;颈动脉硬化;股动脉血栓形成;十二指肠溃疡;非毒性多结节性甲状腺肿;肺结节;2型糖尿病;肾结石;下肢动脉粥样硬化;腰椎间盘突出;胸椎骨折;高血压病;后天性肾囊肿	好转	董其谦	李勇	傅方望
422	G04(神内+老年)	2022-02-09	2022-02-27	3197284	陈星招	男	81Y	椎动脉狭窄脑梗死	低钠血症;颈动脉硬化;高血压性心脏病;肺部感染;前列腺增生;尿道损伤;泌尿道感染;肺气肿;肋骨骨折;颈椎间盘突出;睡眠障碍;低氯血症;下肢动脉粥样硬化;下肢动脉狭窄;肝功能异常;下肢静脉血栓形成	好转	邬伟	邬伟	郑园园
423	G04(神内+老年)	2022-10-15	2022-11-09	3293897	孔春兰	女	76Y	多发性脑梗死	下肢静脉血栓形成;锁骨下动脉粥样硬化;骨质疏松;腔隙性脑梗死;泌尿道感染;脊柱压缩性骨折;特指手术后状态;高血压病	好转	董其谦	邵胜敏	邵胜敏
424	H07骨科综合病区	2022-01-03	2022-01-16	3183151	高宝香	女	87Y	股骨颈骨折	高血压病;胆囊结石;下肢深静脉血栓形成;下肢动脉粥样硬化	治愈	陈龙	陈龙	应晓洲	人工股骨头置换术
425	H07骨科综合病区	2022-03-02	2022-03-15	3203095	曹进昌	男	64Y	股骨粗隆间骨折	下肢深静脉血栓形成;2型糖尿病;前列腺结石	治愈	孔建中	孔建中	陈墨川	下肢静脉滤器置入术;股静脉穿刺置管术;股骨骨折切开复位髓内针内固定术
426	H07骨科综合病区	2022-05-16	2022-06-02	3231700	朱美凤	女	78Y	股骨粗隆间骨折	后天性肾囊肿;下肢动脉粥样硬化;高血压病;哮喘;下肢静脉血栓形成;人工髋关节;2型糖尿病	治愈	潘孝云	杨阳	陈德横	股骨骨折闭合复位钢针内固定术
427	H07骨科综合病区	2022-08-08	2022-08-20	3262793	周阿微	女	72Y	股骨颈骨折	高血压病;2型糖尿病;特指手术后状态;下肢动脉粥样硬化;下肢动脉硬化闭塞症;下肢静脉血栓形成;后天性肾囊肿	治愈	潘孝云	杨阳	薛星河	全髋关节表面置换术
428	H07骨科综合病区	2022-11-13	2022-11-21	3298450	金学青	男	66Y	肩袖损伤	肩撞击综合征;肋骨骨折;肩胛骨骨折;耻骨骨折;下肢静脉血栓形成;脂肪肝	治愈	潘孝云	潘孝云	陈德横	肩关节镜下肩袖修补术
429	H07胸外icu	2022-07-12	2022-08-07	3257992	王绍彬	男	68Y	肺恶性肿瘤	肺炎;慢性浅表性胃炎;下肢深静脉血栓形成;淋巴结继发恶性肿瘤;陈旧性肋骨骨折;肺气肿;肺部感染;感染性休克;非感染性全身炎症反应综合征伴器官衰竭;肺结节	未愈	黄宪平	潘利伟	潘利伟
430	H08胸外	2022-06-14	2022-06-29	3241850	柳文镯	男	65Y	创伤性胸腔积液	下肢静脉血栓形成;肾上腺出血;肺结节;特指手术后状态;肝损伤;多发性腰椎骨折;脑缺血灶;腰椎间盘突出;肺挫伤;声带麻痹	治愈	杨文宇	周伟鹤	林志勇	胸腔闭式引流术
431	H08胸外	2022-07-20	2022-08-01	3255534	张诗敏	男	83Y	胸部脊髓损伤	神经源性膀胱;下肢静脉血栓形成;脑动脉瘤;腔隙性脑梗死;骨质疏松;头皮裂伤;多处挫伤;肺挫伤;特指手术后状态;神经源性肠;多发性肋骨骨折;腰椎骨折;创伤性胸腔积液;高血压病;不完全截瘫	好转	赵曙光	赵曙光	赵曙光	胸腔闭式引流术
432	H08胸外	2022-09-17	2022-10-01	3279574	徐送寿	男	85Y	肺挫伤	多发性肋骨骨折;下肢动脉粥样硬化;颈动脉硬化;胆囊结石;下肢静脉血栓形成;特指手术后状态;面部软组织挫伤;创伤性胸腔积液;高血压病	好转	黄宪平	章岳峰	吴威佳
433	H09胃肠外科	2022-06-08	2022-07-02	3242682	陈益鑫	男	69Y	胃溃疡伴出血	支气管扩张伴感染;慢性胃炎;面部肿物;陈旧性肋骨骨折;下肢静脉血栓形成;下肢动脉粥样硬化;老年性脑萎缩;胸腔积液	好转	林李淼	林李淼	吴利敏	胃十二指肠动脉栓塞术
434	H10胆胰外科	2021-12-27	2022-01-09	3180629	王玉连	女	78Y	十二指肠溃疡	手术后随诊检查;骨质疏松;动脉粥样硬化;静脉栓塞和血栓形成;下肢静脉血栓形成;神经源性膀胱;高脂血症;腰椎骨折;幽门螺旋杆菌感染;慢性胃炎;下肢动脉粥样硬化	好转	王文星	郑波	吴利敏	胃镜检查
435	H11颈部外科	2022-08-02	2022-08-20	3262319	胡光平	男	52Y	股骨粗隆间骨折	下肢静脉血栓形成;慢性胃炎;腰椎骨折	治愈	余可和	余可和	卢晓郎	股骨骨折切开复位螺钉内固定术
436	H11颈部外科	2022-11-01	2022-11-12	3295013	徐岩松	男	82Y	髌骨骨折	下肢静脉血栓形成;脂肪肝;胆囊结石;后天性肾囊肿;前列腺增生;四头肌和肌腱损伤;下肢动脉粥样硬化	治愈	陈龙	陈龙	应晓洲	髌骨骨折切开复位螺钉内固定术;韧带修补术
437	H11颈部外科	2022-11-13	2022-11-27	3300790	黄准西	男	71Y	肱骨髁间骨折	肺气肿;前列腺结石;骨质疏松;下肢静脉血栓形成;前列腺增生;后天性肾囊肿	治愈	翁益民	翁益民	项光恒	股骨骨折切开复位螺钉内固定术;关节软骨修复术
438	H11颈部外科	2022-12-02	2022-12-05	3303927	吴爱莲	女	60Y	取除骨折内固定装置	踝骨闭合性骨折;高血压病;下肢静脉血栓形成;肝囊肿	其他	余可和	余可和	卢迪	踝关节内固定物取出术
439	H12肝脾外科	2022-06-22	2022-06-23	3239369	彭平安	男	46Y	下肢特指深部脉管静脉炎和血栓性静脉炎	创伤性蛛网膜下腔出血;脑挫伤;肩胛骨骨折;面骨骨折;多发性肋骨骨折;创伤性硬膜下出血	好转	邓超频	艾鹏	陈魁	下肢静脉造影;股静脉穿刺术;下腔静脉滤器置入术
440	H13内分泌血管外科	2022-01-04	2022-01-22	3184944	陈浪	男	46Y	下肢深静脉血栓形成	下肢动脉血栓形成;腰椎骨折;面部损伤;皮下血肿;肾挫伤;大腿挫伤;膝挫伤	好转	邓超频	陈聪	郑继行	髂静脉球囊扩张成形术;下肢静脉滤器置入术;下肢静脉造影;下肢静脉导管溶栓
441	H13内分泌血管外科	2022-01-19	2022-01-26	3186579	黄希涨	男	68Y	大隐静脉曲张	下肢浅表脉管静脉炎和血栓静脉炎;下肢深静脉血栓形成;下肢动脉粥样硬化;原发性单侧膝关节病;陈旧性股骨骨折;前列腺增生	治愈	邓超频	陈聪	郑继行	下肢静脉造影;股静脉穿刺术;下腔静脉滤器置入术;大隐静脉高位结扎剥脱术
442	H13内分泌血管外科	2022-02-06	2022-02-07	3190916	刘渝生	男	68Y	下肢深静脉血栓形成	髌骨骨折	好转	邓超频	陈聪	陈魁	下肢静脉造影;股静脉穿刺术;下腔静脉滤器置入术
443	H13内分泌血管外科	2022-01-29	2022-02-09	3191867	潘小华	女	67Y	下肢深静脉血栓形成	骨盆骨折;肺挫伤;肋骨骨折	好转	邓超频	陈聪	陈魁	下腔静脉滤器置入术;下肢静脉造影
444	H13内分泌血管外科	2022-02-27	2022-03-09	3200993	徐玉钗	女	60Y	下肢深静脉血栓形成	硬脑膜下积液;骨盆骨折;特指器官后天性缺失;具有人工眼;手术后恢复期	好转	邓超频	陈聪	陈魁	下肢静脉造影;股静脉穿刺术;下腔静脉滤器置入术
445	H13内分泌血管外科	2022-05-22	2022-05-31	3231049	温成洪	男	68Y	2型糖尿病性视网膜病变	颈动脉硬化;下肢动脉粥样硬化;腔隙性脑梗死;内踝骨折;颈椎关节强硬;前列腺结石;下肢静脉血栓形成	好转	郑超	郑超	王靓	下肢静脉造影
446	H13内分泌血管外科	2022-05-28	2022-06-04	3232285	柳良春	男	44Y	下肢深静脉血栓形成	下肢骨折;慢性上颌窦炎;急性上呼吸道感染;前列腺结石;脂肪肝	治愈	邓超频	艾鹏	郑继行	下肢静脉造影
447	H13内分泌血管外科	2022-06-04	2022-06-07	3233570	黄维克	男	27Y	取除下腔静脉滤器	累及认知功能和意识特指症状和体征;脊髓病性膀胱;脊髓损伤;脑挫伤;肩胛骨骨折;肋骨骨折;腰椎骨折;下肢深静脉血栓形成;截瘫;肩袖损伤	其他	邓超频	艾鹏	陈魁	下腔静脉滤器取出术;下肢静脉造影
448	H13内分泌血管外科	2022-06-03	2022-06-15	3236701	刘成洪	男	76Y	下肢动脉栓塞	退行性主动脉瓣疾患;二尖瓣主动脉瓣及三尖瓣关闭不全;腰椎骨折;下肢动脉血栓形成;高血压性心脏病;具有心脏起搏器;慢性肾衰竭;颈动脉硬化;下肢动脉粥样硬化;心功能Ⅱ级;心房颤动;Ⅲ度房室传导阻滞	治愈	邓超频	陈聪	潘浩	筋膜间隙切开减压术;皮肤和皮下组织非切除性清创;皮肤缝合术;下肢动脉导管溶栓;下肢动脉造影
449	H13内分泌血管外科	2022-08-23	2022-08-31	3267533	苏尔奇	男	59Y	2型糖尿病	下肢动脉粥样硬化;下肢静脉血栓形成;踝骨闭合性骨折;三角韧带断裂;胫骨上端骨折;高脂血症;胆囊结石	好转	吴朝明	戴志娟	周盈盈
450	H13内分泌血管外科	2022-09-19	2022-09-22	3275967	余礼朋	男	64Y	下肢深静脉血栓形成	下肢动脉粥样硬化;陈旧性股骨颈骨折;陈旧性臂骨折;肝囊肿;后天性肾囊肿	好转	邓超频	陈聪	高自勉	下肢静脉造影
451	H13内分泌血管外科	2022-09-20	2022-10-12	3282926	陈兰妹	女	66Y	股骨颈骨折	下肢静脉血栓形成;下肢动脉粥样硬化;胆囊结石;肾错构瘤;胸椎骨折;陈旧性肋骨骨折;肾上腺良性肿瘤;原发性醛固酮过多症;低钾血症;2型糖尿病;高血压病;贫血;梅毒	治愈	郑超	吴笑英	218308	全髋关节表面置换术;陶瓷-聚乙烯髋关节置换
452	H13内分泌血管外科	2022-10-19	2022-10-26	3288520	上官美莲	女	60Y	取除下腔静脉滤器	陈旧性腰椎骨折;下肢深静脉血栓形成;下肢动脉粥样硬化;高血压病	其他	陈聪	艾鹏	陈魁	下腔静脉滤器取出术;下腔静脉造影
453	H13内分泌血管外科	2022-10-22	2022-11-09	3293864	叶爱英	女	62Y	取除下腔静脉滤器	皮肤裂伤;肺炎;下肢动脉粥样硬化;半月板撕裂，近期的;膝关节僵硬;多发性腰椎骨折;外伤性硬脑膜下积液;下肢深静脉血栓形成;下肢静脉血栓形成;髂骨骨折;髋臼骨折;耻骨骨折;胫骨骨折;腓骨骨折;大腿挫伤;膝关节副韧带扭伤	其他	邓超频	艾鹏	陈魁	下腔静脉造影;下腔静脉滤器取出术
454	H14呼吸内科	2021-12-29	2022-01-22	3184833	季克会	男	82Y	肺部感染	高血压病;继发性双侧髋关节病;腰椎骨折;特指脑梗死;口腔粘膜溃疡;真菌感染;支气管哮喘，非危重;股骨粗隆间骨折;下肢静脉血栓形成;胸椎骨折	好转	夏晓东	夏晓东	林秀慧
455	H14呼吸内科	2022-01-13	2022-01-31	3188436	陈启党	男	64Y	颈部脊髓损伤	低蛋白血症;下肢动脉粥样硬化;颈椎间盘突出;肝囊肿;胸腔积液;低通气综合征;创伤性截瘫;颈椎椎管狭窄;下肢静脉血栓形成;颈椎骨折;肺挫伤;睡眠呼吸暂停;肺部感染	好转	何剑波	何剑波	卢超慧	颈椎人工骨植骨术;后入路颈椎融合术;椎弓根钉内固定术;颈椎椎板切除减压术
456	H14呼吸内科	2022-01-08	2022-03-19	3196900	史碎香	女	74Y	胸部脊髓损伤	食管裂孔疝;肝硬化;肾结石;后天性肾囊肿;下肢动脉粥样硬化;下肢静脉血栓形成;粒细胞缺乏;截瘫;胸椎骨折;闭合性胫骨平台骨折;血容量不足性休克;泌尿道感染;肺部感染;股骨粗隆间骨折;肋骨骨折;肺挫伤;头皮血肿;骨盆骨折	治愈	林洁2	刘道猴	邱章伟	脊椎骨折复位术;椎弓根钉内固定术;胫骨骨折闭合复位螺钉内固定术;胸椎椎板切除减压术
457	H14呼吸内科	2022-03-22	2022-04-08	3211522	潘凤香	女	71Y	慢性阻塞性肺病伴急性加重	高血压病;肺性脑病;陈旧性肋骨骨折;低钾血症;肺部感染;下肢静脉曲张;下肢静脉血栓形成;呼吸衰竭	好转	何剑波	金芬华	金芬华	气管插管
458	H14呼吸内科	2022-04-09	2022-04-20	3215887	徐良七	男	87Y	支气管扩张	特指主动脉瓣疾患;下肢动脉粥样硬化;肺动脉高压中度;高血压病;老年性脑萎缩;后天性肾囊肿;多发性脑梗死;房性早搏;陈旧性肋骨骨折;前列腺结石;前列腺增生;胆囊息肉;肺部感染;肺气肿;下肢静脉血栓形成;老年性痴呆;痛风;主动脉瓣关闭不全	好转	夏晓东	夏晓东	林秀慧
459	H14呼吸内科	2022-04-11	2022-04-24	3217251	吴大贤	男	70Y	肺栓塞	下肢动脉粥样硬化;高血压病;胆囊结石;硬皮病性肺间质纤维化;肾结石;冠状动脉粥样硬化性心脏病;骨质疏松伴病理性骨折;椎动脉狭窄;脂肪肝;下肢静脉血栓形成;肺部感染;后天性肾囊肿	好转	夏晓东	夏晓东	林秀慧	腰椎骨折球囊扩张成形术
460	H14呼吸内科	2022-08-12	2022-08-29	3266514	杨永钗	女	87Y	股骨髁骨折	呼吸衰竭;支气管扩张伴感染;腰椎骨折;腰椎退行性病变;高血压病;下肢动脉粥样硬化;下肢静脉血栓形成;肝囊肿;胆囊结石;后天性肾囊肿	好转	颜孙舜	林慧	林慧	股骨骨折切开复位钢板内固定术
461	H14呼吸内科	2022-09-14	2022-09-25	3276991	林炳莲	女	80Y	肺部感染	胸腔积液;股骨粗隆间骨折;静脉栓塞和血栓形成;高血压病;下肢动脉粥样硬化	好转	林洁2	林洁2	218279
462	H14呼吸内科	2022-07-30	2022-09-30	3272272	管素蕊	女	82Y	肺栓塞	泌尿道感染;肝功能异常;粒细胞缺乏;消化道出血;阿尔茨海默病;后天性肾囊肿;间质性肺病;胆囊结石;鹰嘴骨折;下肢静脉血栓形成;下肢动脉粥样硬化;肺部感染;肝囊肿	治愈	徐慧	徐慧	王道会
463	H14呼吸内科	2022-12-11	2022-12-21	3310100	杨阿玉	女	60Y	肺恶性肿瘤	骨继发恶性肿瘤;胸腔积液;阻塞性肺气肿;高血压病;2型糖尿病;高胆固醇血症;后天性肾囊肿;肾结石;陈旧性肋骨骨折;下肢静脉血栓形成	未愈	颜孙舜	颜孙舜	王道会	支气管镜下支气管活检
464	H15消化内科	2022-02-08	2022-03-22	3205589	王秋华	女	71Y	药物性肝炎伴肝功能衰竭	脑梗死后遗症;胃排空障碍;食管痉挛;高血压病;特指手术后状态;下肢深静脉血栓形成;单纯性肾囊肿;耻骨骨折;陈旧性腰椎骨折;主动脉钙化	好转	蔡振寨	蔡振寨	叶梦思
465	H15消化内科	2022-09-12	2022-09-28	3277851	杨雪花	女	82Y	结肠腺瘤样息肉病	下肢静脉血栓形成;下肢动脉粥样硬化;脂肪肝;心脏肿瘤;后天性肾囊肿;陈旧性肱骨骨折;肋骨骨折;低钾血症;腰椎退行性病变;脂膜炎	治愈	夏宣平	闫峻	卢光荣	肩袖修补术;肱骨骨折切开复位螺钉内固定术;电子肠镜下结肠息肉切除术
466	H15消化内科	2022-10-22	2022-11-28	3301167	丁孟金	男	66Y	肝恶性肿瘤	下肢静脉血栓形成;股骨颈骨折;脾功能亢进;腹水;肝肾综合征;心力衰竭;肾衰竭;败血症;肺结节;颈动脉硬化;下肢动脉粥样硬化;肝硬化失代偿期;酒精性肝纤维化和肝硬化;肝硬化伴食管胃底静脉曲张破裂出血;门静脉高压;脓毒血症;肝衰竭;肺部感染	好转	蒋益	曹曙光	邵晓晓	肝动脉化学物质栓塞（TACE）;腹腔穿刺术
467	H16血液内科	2022-02-05	2022-03-01	3198129	林春香	女	73Y	多发性骨髓瘤	骨质疏松;肺部感染;胸椎骨折;高血压病;下肢静脉血栓形成;韦尼克脑病	好转	姚荣欣	何牧卿	林晓骥
468	H16血液内科	2022-04-07	2022-04-16	3214305	盛从招	男	79Y	背部恶性肿瘤	肺部感染;胆道感染;胆总管扩张;消化道出血;肾衰竭;后天性肾囊肿;多发性骨折;下肢静脉血栓形成;室性心动过速;肥厚型非梗阻性心肌病;心房颤动	未愈	姚荣欣	郭文坚	黄河2	骨髓活体组织检查术;骨髓穿刺术（骨穿）
469	K02康复	2021-12-26	2022-01-10	3181076	吴凤珠	女	58Y	胸部脊髓损伤	截瘫;尿潴留;陈旧性腰椎骨折;颈椎关节强硬;高血压病;下肢静脉血栓形成;下肢动脉粥样硬化;缺铁性贫血;胆囊结石;陈旧性胸椎骨折;神经源性膀胱	好转	屠文展	林海燕2	程博
470	K02康复	2021-12-28	2022-01-26	3186797	杨崇勉	男	64Y	颈部脊髓损伤	神经源性膀胱;下肢动脉粥样硬化;上消化道出血;颈椎椎管狭窄;脑挫伤;颅骨骨折;肺挫伤;胸腔积液;腹水;下肢静脉血栓形成;老年性脑萎缩;胆囊炎;后天性肾囊肿;创伤性牙齿脱落;运动障碍;神经源性肠	好转	蒋松鹤	卢君艳	陈文斯
471	K02康复	2022-03-07	2022-04-15	3214163	陈启党	男	63Y	颈部脊髓损伤	脊髓病性膀胱;四肢瘫痪;神经源性肠;下肢动脉粥样硬化;颈椎椎管狭窄;低通气综合征;睡眠呼吸暂停;肺挫伤;颈椎骨折;肝囊肿;胸腔积液;下肢静脉血栓形成;颈椎间盘突出	好转	蒋松鹤	卢君艳	陈文斯
472	K02康复	2022-03-22	2022-04-17	3214990	郭林科	男	55Y	下肢深静脉血栓形成	高脂血症;髌骨骨折;膝关节僵硬	好转	蒋松鹤	郑余银	李慧芳
473	K02康复	2022-03-14	2022-04-18	3215331	杜攀攀	男	28Y	腰部脊髓特指损伤	神经源性膀胱;胆囊结石;开放性足骨折;踝骨闭合性骨折;胫骨下端骨折;神经源性肠;跟骨骨折;腰椎骨折;泌尿道感染;胆总管结石;脂肪肝;下肢静脉血栓形成;截瘫;高脂血症	好转	蒋松鹤	郑余银	高丽萍
474	K02康复	2022-04-16	2022-05-16	3225452	陈启党	男	63Y	颈部脊髓损伤	肩回旋套肌腱损伤;四肢瘫痪;睡眠呼吸暂停;肺挫伤;颈椎骨折;泌尿道感染;肝囊肿;胸腔积液;下肢静脉血栓形成;颈椎间盘突出;颈椎椎管狭窄;下肢动脉粥样硬化;神经源性膀胱;神经源性肠;低通气综合征	好转	蒋松鹤	卢君艳	陈文斯	关节穿刺术
475	K02康复	2022-05-21	2022-06-20	3238509	陈启党	男	63Y	颈部脊髓损伤	肩回旋套肌腱损伤;颈椎间盘突出;颈椎椎管狭窄;神经源性肠;下肢动脉粥样硬化;脊髓病性膀胱;四肢瘫痪;肺挫伤;颈椎骨折;下肢静脉血栓形成	好转	蒋松鹤	林海燕2	陈文斯
476	K02康复	2022-06-26	2022-07-26	3253151	胡雪媚	女	62Y	胸部脊髓损伤	胸椎骨折;乙型肝炎小三阳;泌尿道感染;下肢静脉血栓形成;腰椎骨折;后天性肾囊肿;截瘫;脊髓病性膀胱;神经源性肠;胆囊息肉	好转	蒋松鹤	林海燕2	林乐2
477	K02康复	2022-06-29	2022-08-02	3255778	徐玉双	女	67Y	骨盆骨折	下肢静脉血栓形成;下肢动脉粥样硬化;原发性单侧膝关节病;多发性肋骨骨折;腰椎骨折;特指手术后状态;髋和大腿水平特指神经损伤;髋和大腿水平坐骨神经损伤;尺骨桡骨闭合性骨折	好转	蒋松鹤	郑余银	邹恩苗
478	K02康复	2022-06-27	2022-08-03	3256608	陈彩萍	女	81Y	老年性痴呆	类风湿性关节炎;肺部感染;胸腔积液;高血压病;2型糖尿病;下肢溃疡;下肢动脉粥样硬化;下肢静脉血栓形成;褥疮;头部外伤;低蛋白血症;胆囊结石;肾结石;子宫肿物;肋骨骨折;老年性脑萎缩;脑积水	好转	蒋松鹤	林海燕2	林乐2
479	K02康复	2022-07-09	2022-08-07	3258071	董碎波	男	68Y	颈部脊髓损伤	前列腺增生;后天性肾囊肿;下肢静脉血栓形成;颈椎骨折;下肢动脉粥样硬化	好转	蒋松鹤	郑余银	邹恩苗
480	K02康复	2022-08-01	2022-08-31	3267596	胡雪媚	女	62Y	腰部脊髓特指损伤	下肢静脉血栓形成;胆囊息肉;后天性肾囊肿;泌尿道感染;涉及使用特指康复操作医疗;慢性乙型病毒性肝炎;截瘫;脊髓病性膀胱;神经源性肠;胸椎骨折;腰椎骨折;乙型肝炎小三阳	好转	蒋松鹤	林海燕2	陈文斯
481	K02康复	2022-08-03	2022-09-25	3277012	陈彩萍	女	81Y	老年性痴呆	脑积水;子宫肿物;类风湿性关节炎;肺部感染;胸腔积液;2型糖尿病足病;腹主动脉狭窄;髂动脉闭塞性粥样硬化;下肢动脉硬化闭塞症;下肢静脉血栓形成;骨质疏松;多发性肋骨骨折;褥疮;低蛋白血症;高血压病;胆囊结石;肾结石;老年性脑萎缩	好转	蒋松鹤	林海燕2	林乐2
482	K02康复	2022-08-27	2022-09-30	3279450	徐彩珠	女	54Y	胫腓骨下端骨折	肺挫伤;下肢静脉血栓形成;后天性肾囊肿;贫血;涉及使用特指康复操作医疗;踝关节僵硬;特指趾骨骨折;闭合性胫骨平台骨折;小腿挫伤;膝关节十字韧带扭伤;膝关节副韧带扭伤;膝关节积液;膝关节僵硬;创伤性硬膜下出血;脑挫伤;创伤性蛛网膜下腔出血	好转	蒋松鹤	郑余银	高丽萍
483	K02康复	2022-08-29	2022-10-09	3281603	任家祥	男	55Y	胸部脊髓损伤	多发性胸椎骨折;后天性肾囊肿;肝囊肿;头部外伤;胸腔积液;截瘫;脊髓病性膀胱;神经源性肠;下肢静脉血栓形成;褥疮;泌尿道感染;涉及使用特指康复操作医疗;胸椎椎管狭窄;腰椎骨折;肩胛骨骨折;多发性肋骨骨折;颧骨骨折;肺部感染;血胸	好转	蒋松鹤	卢君艳	218289
484	K02康复	2022-09-05	2022-10-10	3282061	俞盛龙	男	85Y	创伤性蛛网膜下腔出血	轻度认知障碍;泌尿道感染;前列腺增生;输尿管结石;肾结石;下肢静脉血栓形成;下肢动脉粥样硬化;创伤性硬膜下出血;脑挫伤;涉及使用特指康复操作医疗;运动障碍;颞骨骨折;脑脊液耳漏	好转	屠文展	屠文展	林心心
485	K02康复	2022-09-04	2022-10-12	3283070	何有正	男	53Y	脊髓病	腰椎退行性病变;肺恶性肿瘤;截瘫;肿瘤性病理性骨折;药物性皮炎;腰椎间盘突出;褥疮;下肢静脉血栓形成;骨继发恶性肿瘤	好转	蒋松鹤	卢君艳	林乐2
486	K02康复	2022-09-05	2022-10-16	3284504	朱巧云	女	68Y	髂骨骨折	额骨骨折;耻骨骨折;髋臼骨折;涉及使用特指康复操作医疗;躯干部血管瘤;下肢动脉粥样硬化;颈椎间盘突出;慢性额窦炎;额部血肿;腹水;下肢静脉血栓形成;髋和大腿水平坐骨神经损伤;2型糖尿病;脂肪肝;肺结节	好转	蒋松鹤	郑余银	高丽萍
487	K02康复	2022-09-25	2022-10-24	3287499	陈彩萍	女	82Y	老年性痴呆	老年性脑萎缩;脑积水;类风湿性关节炎;2型糖尿病足病;下肢动脉硬化闭塞症;下肢静脉血栓形成;骨质疏松;多发性肋骨骨折;褥疮;低蛋白血症;高血压病;胆囊结石;肾结石;子宫肿物;腹主动脉狭窄;髂动脉闭塞性粥样硬化;涉及使用特指康复操作医疗	好转	蒋松鹤	卢君艳	林乐2
488	K02康复	2022-10-04	2022-11-02	3291429	徐彩珠	女	54Y	胫腓骨下端骨折	脑挫伤;小腿挫伤;大腿挫伤;特指趾骨骨折;膝关节十字韧带扭伤;膝关节副韧带扭伤;膝关节积液;膝关节僵硬;静脉栓塞和血栓形成;创伤性硬膜下出血;创伤性蛛网膜下腔出血;头皮血肿;肺挫伤;涉及使用特指康复操作医疗;后天性肾囊肿;贫血	好转	蒋松鹤	郑余银	高丽萍	关节穿刺术
489	K02康复	2022-10-19	2022-11-17	3297224	何有正	男	54Y	脊髓病	截瘫;肺恶性肿瘤;肿瘤性病理性骨折;腰椎退行性病变;腰椎间盘突出;下肢静脉血栓形成;前列腺结石;涉及使用特指康复操作医疗	好转	蒋松鹤	卢君艳	林乐2
490	K02康复	2022-10-17	2022-11-20	3298135	朱巧云	女	70Y	髂骨骨折	髋臼骨折;耻骨骨折;髋关节僵硬;腰骶部脊髓神经丛损伤;下肢动脉粥样硬化;慢性额窦炎;下肢静脉血栓形成;额骨骨折;头皮血肿;腹水;颈椎间盘突出;躯干部血管瘤;2型糖尿病;肺结节;脂肪肝;涉及使用特指康复操作医疗	好转	蒋松鹤	郑余银	黄世园
491	K02康复	2022-10-16	2022-11-21	3298738	任家祥	男	56Y	胸部脊髓特指损伤	截瘫;脊髓病性膀胱;神经源性肠;褥疮;泌尿道感染;下肢静脉血栓形成;创伤后伤口感染;胸椎骨折;腰椎骨折;肩胛骨骨折;多发性肋骨骨折;颧骨骨折;创伤性胸腔积液;肝囊肿;后天性肾囊肿;涉及使用特指康复操作医疗	好转	蒋松鹤	卢君艳	林乐2
492	K02康复	2022-11-09	2022-11-23	3299314	徐彩珠	女	54Y	膝关节僵硬	后天性肾囊肿;下肢静脉血栓形成;涉及使用特指康复操作医疗;踝关节僵硬;肩关节僵硬;腓骨骨折;股骨骨折;膝关节十字韧带扭伤;膝关节副韧带扭伤;膝关节特指部位扭伤;膝关节积液;创伤性硬膜下出血;脑挫伤;创伤性蛛网膜下腔出血;皮下血肿;肺挫伤	好转	蒋松鹤	郑余银	高丽萍	关节穿刺术
493	K02康复	2022-11-15	2022-12-24	3311423	刘龙光	男	63Y	颈部脊髓损伤	低钾血症;非器质性失眠症;涉及使用特指康复操作医疗;四肢瘫痪;神经源性肠;脊髓病性膀胱;体位性低血压;泌尿道感染;颈椎骨折;颈椎间盘突出;胸腔积液;下肢静脉血栓形成	好转	蒋松鹤	卢君艳	218289
494	K02康复	2022-11-21	2022-12-27	3312548	任家祥	男	56Y	胸部脊髓损伤	截瘫;脊髓病性膀胱;神经源性肠;下肢静脉血栓形成;褥疮;泌尿道感染;创伤后伤口感染;胸椎骨折;腰椎骨折;涉及使用特指康复操作医疗;肩胛骨骨折;肋骨骨折;颧骨骨折;血胸;胸腔积液;特指手术后状态;肝囊肿;后天性肾囊肿	好转	蒋松鹤	卢君艳	218289
495	K02康复	2022-11-30	2022-12-29	3313530	何有正	男	54Y	胸部脊髓损伤	涉及使用特指康复操作医疗;截瘫;脊髓病性膀胱;神经源性肠;肺恶性肿瘤;骨继发恶性肿瘤;腰椎退行性病变;腰椎间盘突出;下肢静脉血栓形成;前列腺结石;慢性龈炎;病理性骨折	好转	蒋松鹤	卢君艳	218289
496	K06康复	2021-12-04	2022-01-05	3179578	李鑫	女	20Y	颈部脊髓损伤	四肢瘫痪;神经源性膀胱;气管造口状态;手术后随诊检查;腰椎骨折;下肢静脉血栓形成;肾结石;膀胱结石;泌尿道感染;体位性低血压;肺部感染	好转	蒋松鹤	卢君艳	林乐2
497	K06康复	2022-01-05	2022-01-18	3183747	徐红迪	女	78Y	骨盆骨折	锁骨骨折;耻骨骨折;肋骨骨折;腰椎骨折;下肢动脉粥样硬化;下肢静脉血栓形成;蛛网膜下腔出血;肺结节;肝囊肿;具有特指功能性植入物;骶骨骨折	好转	蒋松鹤	郑余银	高丽萍	下腔静脉滤器置入术;股静脉穿刺术
498	K06康复	2021-12-18	2022-01-18	3183849	陈余挺	男	49Y	腰部脊髓特指损伤	下肢静脉血栓形成;肝功能异常;胸腔积液;多发性肋骨骨折;腰椎骨折	好转	蒋松鹤	卢君艳	林乐2
499	K06康复	2022-01-15	2022-02-06	3190731	林华敏	男	54Y	创伤性硬膜下出血	创伤性蛛网膜下腔出血;外伤后脑积水;手术后恢复期;创伤性脑血肿;腰骶部脊柱骨折;脑挫伤;高血压病;下肢动脉粥样硬化;下肢静脉血栓形成;脂肪肝;后天性肾囊肿;前列腺增生;肺部感染	好转	屠文展	林海燕2	程博
500	K06康复	2022-01-06	2022-02-13	3193829	李鑫	女	20Y	颈部脊髓损伤	四肢瘫痪;神经源性膀胱;由于活动能力降低而需要帮助;下肢深静脉血栓形成;慢性鼻炎;体位性低血压;腰椎骨折;肾结石;膀胱结石;特指手术后状态	好转	蒋松鹤	卢君艳	姜方琦
501	K06康复	2022-01-19	2022-02-24	3196341	徐月华	女	65Y	股骨粗隆间骨折	鹰嘴骨折;闭合性胫骨平台骨折;髋关节僵硬;膝关节僵硬;骨质疏松;肘关节僵硬;肝囊肿;肾钙化;乳房恶性肿瘤个人史;甲状腺恶性肿瘤个人史;骨继发恶性肿瘤;缺铁性贫血;粒细胞缺乏;下肢静脉血栓形成	好转	蒋松鹤	郑余银	高丽萍
502	K06康复	2022-01-31	2022-03-01	3198061	陈启党	男	63Y	颈部脊髓损伤	胸腔积液;睡眠呼吸暂停;低蛋白血症;下肢动脉粥样硬化;神经源性肠;静脉栓塞和血栓形成;颈椎间盘突出;颈椎骨折;低通气综合征;神经源性膀胱;肺挫伤;肺部感染;颈椎椎管狭窄;肝囊肿	好转	蒋松鹤	卢君艳	陈文斯
503	K06康复	2022-02-01	2022-03-06	3199940	杜攀攀	男	28Y	腰部脊髓特指损伤	胆囊结石;胆总管结石;脂肪肝;泌尿道感染;下肢静脉血栓形成;腰椎骨折;胫骨下端骨折;跟骨骨折;神经源性肠;创伤性截瘫;神经源性膀胱	好转	蒋松鹤	郑余银	高丽萍
504	K06康复	2022-03-06	2022-04-08	3211629	黄维克	男	27Y	胸部脊髓损伤	腰椎骨折;胸椎骨折;腹股沟疝;下肢静脉血栓形成;脑室出血;肩袖损伤;肩胛骨骨折;脑挫伤;肺挫伤;多发性肋骨骨折;累及认知功能和意识特指症状和体征;脊髓病性膀胱;创伤性截瘫	好转	蒋松鹤	卢君艳	林乐2
505	K06康复	2022-03-06	2022-04-09	3211885	徐玉双	女	67Y	骨盆骨折	甲状腺囊肿出血;髋和大腿水平坐骨神经损伤;下肢动脉粥样硬化;神经源性膀胱;尺骨桡骨闭合性骨折;腰椎骨折;静脉栓塞和血栓形成;髋臼骨折;迷走神经损伤;肋骨骨折	好转	蒋松鹤	郑余银	林心心
506	K06康复	2022-03-05	2022-04-10	3212294	徐月华	女	65Y	股骨粗隆间骨折	骨质疏松;膝关节僵硬;肾钙化;肝囊肿;下肢静脉血栓形成;缺铁性贫血;骨继发恶性肿瘤;甲状腺恶性肿瘤;乳腺恶性肿瘤;肩撞击综合征;脊柱侧弯;闭合性胫骨平台骨折;髋关节僵硬;肘关节僵硬;粒细胞缺乏;鹰嘴骨折	好转	蒋松鹤	郑余银	高丽萍
507	K06康复	2022-03-01	2022-04-12	3213156	杨崇勉	男	65Y	颈部脊髓损伤	神经源性肠;脊髓病性膀胱;四肢瘫痪;抗利尿激素不适当分泌综合征;下肢静脉血栓形成;肺挫伤;颅骨骨折;胆囊炎;食管出血;食管炎;肺部感染;胸腔积液;下肢动脉粥样硬化;颈椎椎管狭窄;创伤性牙齿脱落	好转	蒋松鹤	卢君艳	陈文斯
508	K06康复	2022-04-12	2022-05-11	3223778	杨崇勉	男	65Y	颈部脊髓损伤	创伤性牙齿脱落;抗利尿激素不适当分泌综合征;下肢动脉粥样硬化;肺挫伤;颅骨骨折;胆囊炎;肺部感染;下肢静脉血栓形成;神经源性肠;创伤性胸腔积液;四肢瘫痪	好转	蒋松鹤	卢君艳	陈文斯
509	K06康复	2022-04-20	2022-05-22	3227692	徐月华	女	66Y	股骨粗隆间骨折	脊柱侧弯;白细胞疾患;乳腺恶性肿瘤;甲状腺恶性肿瘤;骨继发恶性肿瘤;缺铁性贫血;下肢静脉血栓形成;肝囊肿;肾钙化;膝关节僵硬;骨质疏松;鹰嘴骨折;闭合性胫骨平台骨折;髋关节僵硬;肘关节僵硬;肩撞击综合征	好转	蒋松鹤	郑余银	高丽萍	关节穿刺术
510	K06康复	2022-05-11	2022-06-05	3232914	杨崇勉	男	65Y	颈部脊髓损伤	下肢静脉血栓形成;肺空洞;神经源性肠;下肢动脉粥样硬化;脊髓病性膀胱;颈椎椎管狭窄;肺部感染;胆囊炎;颅骨骨折;创伤性牙齿脱落;抗利尿激素不适当分泌综合征;四肢瘫痪	好转	蒋松鹤	林海燕2	陈文斯
511	K06康复	2022-06-01	2022-06-13	3235901	徐月华	女	66Y	股骨粗隆间骨折	髋关节僵硬;肘关节僵硬;粒细胞缺乏;鹰嘴骨折;骨质疏松;膝关节僵硬;肾钙化;肝囊肿;下肢静脉血栓形成;缺铁性贫血;骨继发恶性肿瘤;甲状腺恶性肿瘤;乳腺恶性肿瘤;肩撞击综合征;闭合性胫骨平台骨折;脊柱侧弯	好转	蒋松鹤	郑余银	高丽萍
512	K06康复	2022-05-18	2022-06-20	3238488	陈美云	女	45Y	髋臼骨折	开放性髋损伤;腰椎骨折;骨盆骨折;股动脉血栓形成;髂内动脉闭塞;髋关节僵硬;腹、下背和骨盆特指神经损伤;慢性乙型病毒性肝炎	好转	蒋松鹤	郑余银	邹恩苗
513	K06康复	2022-06-01	2022-06-29	3241813	洪鲜红	女	51Y	颈部脊髓损伤	肋骨骨折;泌尿道感染;胸腔积液;下肢静脉血栓形成;下肢深静脉血栓形成;高脂血症;乙型病毒性肝炎;特指颈椎骨折;第二颈椎骨折;头皮开放性伤口;颈椎间盘突出;髂外静脉血栓形成;肺挫伤;股骨骨折;尺骨骨折	好转	蒋松鹤	郑余银	金翩翩	下肢静脉造影;下腔静脉滤器置入术
514	K06康复	2022-05-17	2022-06-29	3242021	李显兰	女	55Y	胸部脊髓损伤	具有眼内晶状体;皮肤移植状态;多发性肋骨骨折;皮肤慢性溃疡;神经源性肠;下肢动脉粥样硬化;脊髓病性膀胱;创伤后伤口感染;锁骨骨折;胸椎骨折;眶骨骨折;下颌骨骨折;鼻骨骨折;颞骨骨折;骨化性肌炎;泌尿道感染;肛裂;外痔;下肢静脉血栓形成	好转	蒋松鹤	林海燕2	林乐2
515	K06康复	2022-06-06	2022-07-03	3243170	缪莲芬	女	78Y	骨盆骨折	胆囊结石;后天性肾囊肿;卵巢囊肿;下肢动脉粥样硬化;骨质疏松;多发性脑梗死;下肢静脉曲张;高血压病;下肢静脉血栓形成	好转	蒋松鹤	郑余银	金翩翩
516	K06康复	2022-07-05	2022-07-24	3252297	陈美云	女	46Y	腰骶部脊髓神经丛损伤	骨盆骨折;髂内动脉闭塞;股动脉血栓形成;髋关节僵硬;腰椎骨折;开放性髋损伤;特指手术后状态;慢性乙型病毒性肝炎;下肢静脉血栓形成	好转	蒋松鹤	邹恩苗	邹恩苗
517	K06康复	2022-06-19	2022-07-24	3252324	张永峰	男	43Y	颈部脊髓损伤	脂肪肝;下肢静脉血栓形成;神经源性肠;四肢瘫痪;颧骨骨折;前列腺增生;颞骨骨折;脊髓病性膀胱;泌尿道感染;特指颈椎骨折	好转	蒋松鹤	林海燕2	林乐2
518	K06康复	2022-06-29	2022-08-04	3256967	李显兰	女	55Y	胸部脊髓损伤	下颌骨骨折;肋骨骨折;肛裂;外痔;眶骨骨折;鼻骨骨折;颞骨骨折;骨化性肌炎;下肢静脉血栓形成;胸椎骨折;创伤性截瘫;脊髓病性膀胱	好转	蒋松鹤	林海燕2	林乐2
519	K06康复	2022-07-04	2022-08-07	3258069	于国杰	男	51Y	股骨粗隆间骨折	胫腓骨下端骨折;下肢静脉血栓形成;高尿酸血症;肋骨骨折;腰椎骨折;膝关节僵硬;肺结节;脂肪肝;下肢动脉粥样硬化;肝功能异常	好转	蒋松鹤	郑余银	邹恩苗
520	K06康复	2022-07-19	2022-08-10	3259392	林茶菜	女	63Y	胫腓骨下端骨折	关节僵硬;皮下血肿;下肢静脉血栓形成;胆囊息肉;肝囊肿	好转	蒋松鹤	郑余银	邹恩苗
521	K06康复	2022-07-16	2022-08-15	3261261	洪鲜红	女	51Y	颈部脊髓损伤	第二颈椎骨折;颈椎间盘突出;尺骨骨折;股骨骨折;头皮开放性伤口;特指颈椎骨折;骨化性肌炎;慢性乙型病毒性肝炎;肋骨骨折;高脂血症;下肢深静脉血栓形成;涉及使用特指康复操作医疗;髂外静脉血栓形成;肺挫伤;创伤性胸腔积液	好转	蒋松鹤	郑余银	李慧芳
522	K06康复	2022-07-26	2022-08-15	3261269	陈美云	女	46Y	髋臼骨折	腰骶神经根损伤;髋关节僵硬;下肢静脉血栓形成;皮肤痈;开放性髋损伤;慢性乙型病毒性肝炎;涉及使用特指康复操作医疗;腰椎骨折	好转	蒋松鹤	郑余银	邹恩苗	电针脉冲疗法
523	K06康复	2022-07-27	2022-08-29	3266865	朱巧云	女	68Y	髂骨骨折	头皮血肿;髋臼骨折;耻骨骨折;腹水;下肢静脉血栓形成;下肢动脉粥样硬化;髋和大腿水平坐骨神经损伤;泌尿道感染;胃肠功能紊乱;涉及使用特指康复操作医疗;脂肪肝;肺结节;颈椎间盘突出;湿疹;躯干部血管瘤;慢性额窦炎;额骨骨折;额部血肿	治愈	蒋松鹤	郑余银	林心心
524	K06康复	2022-07-26	2022-08-29	3266921	张仕亮	男	63Y	胸部脊髓损伤	截瘫;神经源性肠;脊髓病性膀胱;泌尿道感染;胸椎骨折;涉及使用特指康复操作医疗;胸椎脱位;肺挫伤;胸腔积液;下肢静脉血栓形成;肋骨骨折	好转	蒋松鹤	林海燕2	林乐2
525	K06康复	2022-08-06	2022-09-04	3269235	李显兰	女	55Y	胸部脊髓损伤	特指手术后状态;外痔;肛裂;颞骨骨折;鼻骨骨折;眶骨骨折;肋骨骨折;皮肤慢性溃疡;下颌骨骨折;骨化性肌炎;下肢静脉血栓形成;截瘫;脊髓病性膀胱	好转	蒋松鹤	林海燕2	林乐2	肉毒素注射
526	K06康复	2022-08-14	2022-09-13	3272518	张碎年	男	44Y	颈部脊髓损伤	第一颈椎骨折;创伤性硬膜外血肿;创伤性脑疝;颧骨骨折;颞骨骨折;肺挫伤;急性四肢瘫;涉及使用特指康复操作医疗;下肢静脉血栓形成	好转	蒋松鹤	林海燕2	林乐2
527	K06康复	2022-08-20	2022-09-19	3274620	陈仓满	男	65Y	胸部脊髓损伤	神经源性肠;膀胱造口状态;肾结石;下肢动脉粥样硬化;前列腺增生;膀胱结石;下肢静脉血栓形成;胸椎骨折;腰椎骨折;髋臼骨折;前列腺钙化灶;多发性肋骨骨折;截瘫;脊髓病性膀胱	好转	蒋松鹤	林海燕2	林乐2	肉毒素注射
528	K06康复	2022-08-28	2022-09-21	3275494	叶爱英	女	62Y	髋关节僵硬	髂骨骨折;髋臼骨折;耻骨骨折;胫腓骨干骨折;膝关节十字韧带扭伤;外伤性硬脑膜下积液;膝外侧半月板损伤;肺炎;膝内侧半月板损伤;下肢静脉血栓形成;下肢动脉粥样硬化;腰椎骨折;皮肤裂伤;下肢深静脉血栓形成;涉及使用特指康复操作医疗	好转	蒋松鹤	郑余银	李慧芳
529	K06康复	2022-08-23	2022-10-08	3281380	金碎珍	女	67Y	闭合性胫骨平台骨折	腰椎间盘突出;颈椎间盘突出;高血压病;2型糖尿病;脂肪肝;后天性肾囊肿;下肢动脉粥样硬化;下肢静脉血栓形成;乳突炎;股骨骨折;四头肌和肌腱损伤;涉及使用特指康复操作医疗;半月板撕裂，近期的;膝关节副韧带扭伤;肋骨骨折;眼挫伤;头皮血肿	好转	蒋松鹤	郑余银	高丽萍
530	K06康复	2022-09-03	2022-10-09	3281523	朱兆毕	男	53Y	胸部脊髓损伤	神经源性肠;多发性腰椎骨折;多发性骨盆骨折;多发性胸椎骨折;脊髓病性膀胱;截瘫;肩胛骨骨折;多发性肋骨骨折;肾结石;前列腺增生;多处皮肤破损;涉及使用特指康复操作医疗;下肢静脉血栓形成	好转	蒋松鹤	卢君艳	218289
531	K06康复	2022-07-25	2022-10-09	3281725	林美珠	女	52Y	颈部脊髓损伤	脊髓病性膀胱;神经源性肠;颈椎骨折;颈椎脱位;胫腓骨下端骨折;肩胛骨骨折;胸椎骨折;肺部感染;肺不张;四肢瘫痪;泌尿道感染;头皮血肿;涉及使用特指康复操作医疗;下肢静脉血栓形成;肝功能不全	好转	蒋松鹤	王向阳	林乐2	金属脊椎融合物置入术;前外侧入路颈椎融合术;前入路颈椎间盘切除术;2-3块椎骨融合;冠状动脉血管内超声(IVUS);下肢静脉造影;下腔静脉滤器置入术;颅骨牵引;后入路颈椎融合术;钛合金脊椎融合物置入术
532	K06康复	2022-09-07	2022-10-10	3282139	张仕亮	男	63Y	胸部脊髓损伤	多发性胸椎骨折;肋骨骨折;泌尿道感染;下肢静脉血栓形成;胸椎脱位;涉及使用特指康复操作医疗;脊髓病性膀胱;截瘫;神经源性肠	好转	蒋松鹤	卢君艳	林乐2
533	K06康复	2022-08-27	2022-10-11	3282483	何菊辉	女	48Y	胸部脊髓损伤	截瘫;涉及使用特指康复操作医疗;神经源性肠;多发性胸椎骨折;腰椎骨折;骨盆骨折;下肢静脉血栓形成;多发性肋骨骨折;胸骨骨折;肺挫伤;后天性肾囊肿;肾结石;肾钙化;跖骨骨折;楔状骨骨折(足);脊髓病性膀胱	好转	蒋松鹤	郑余银	高丽萍
534	K06康复	2022-09-28	2022-10-15	3284122	刘会升	男	50Y	腰椎骨折	下肢静脉血栓形成;涉及使用特指康复操作医疗	好转	蒋松鹤	郑余银	高丽萍
535	K06康复	2022-09-12	2022-10-16	3284216	朱炳花	女	77Y	人工关节置换术后疼痛	股骨粗隆间骨折;高血压病;2型糖尿病;胆囊结石;后天性肾囊肿;涉及使用特指康复操作医疗;主动脉粥样硬化;冠状动脉粥样硬化;下肢动脉粥样硬化;下肢静脉血栓形成;胰腺占位性病变	好转	蒋松鹤	郑余银	高丽萍
536	K06康复	2022-10-15	2022-10-26	3288483	金碎珍	女	67Y	膝关节僵硬	闭合性胫骨平台骨折;大腿挫伤;半月板撕裂，近期的;膝关节副韧带扭伤;多发性肋骨骨折;眼挫伤;额部血肿;胸腔积液;特指颈椎间盘变性;颈椎间盘突出;腰椎间盘突出;下肢静脉曲张;高血压病;2型糖尿病;脂肪肝;后天性肾囊肿;下肢静脉血栓形成	好转	蒋松鹤	郑余银	高丽萍
537	K06康复	2022-09-20	2022-10-26	3288727	林超英	女	64Y	髋关节僵硬	股骨粗隆间骨折;股骨骨折;多发性肋骨骨折;头部外伤;坠积性肺炎;膝关节僵硬;脊柱侧弯;早搏;特指手术后状态;涉及使用特指康复操作医疗;下肢静脉血栓形成;髋臼骨折;骶骨骨折;耻骨骨折	治愈	蒋松鹤	郑余银	高丽萍
538	K06康复	2022-09-30	2022-10-31	3290614	滕云青	男	50Y	颈部脊髓损伤	四肢瘫痪;脊髓病性膀胱;神经源性肠;颈椎骨折;颈椎椎管狭窄;颈椎间盘突出;泌尿道感染;肺挫伤;胸腔积液;下肢动脉粥样硬化;下肢静脉血栓形成;下肢深静脉瓣膜机能不全;鼻骨骨折;颧骨骨折;多囊肝;涉及使用特指康复操作医疗	好转	蒋松鹤	卢君艳	林乐2
539	K06康复	2022-10-08	2022-11-05	3292443	陈兰飞	女	74Y	骶骨骨折	肺部感染;涉及使用特指康复操作医疗;骨质疏松伴病理性骨折;髋挫伤;臀部软组织损伤;下肢静脉血栓形成;腰椎间盘突出;髌股关节病;盆腔良性肿瘤;高血压病;下肢动脉粥样硬化;应力性骨折	好转	蒋松鹤	郑余银	高丽萍
540	K06康复	2022-10-25	2022-11-10	3294406	朱炳花	女	77Y	股骨粗隆间骨折	涉及使用特指康复操作医疗;骨质疏松伴病理性骨折;髋关节僵硬;主动脉粥样硬化;冠状动脉粥样硬化;下肢动脉粥样硬化;下肢静脉曲张;下肢静脉血栓形成;胆囊结石;后天性肾囊肿;胰腺占位性病变;高血压病;2型糖尿病	好转	蒋松鹤	郑余银	高丽萍
541	K06康复	2022-10-15	2022-11-15	3296401	林美珠	女	52Y	颈部脊髓特指损伤	泌尿道感染;涉及使用特指康复操作医疗;胫腓骨下端骨折;下肢静脉血栓形成;四肢瘫痪;脊髓病性膀胱;神经源性肠;体位性低血压;颈椎骨折;颈椎脱位;肩胛骨骨折;胸椎骨折	好转	蒋松鹤	卢君艳	林乐2
542	K06康复	2022-11-05	2022-11-21	3298582	张积日	男	65Y	创伤性硬膜下出血	创伤性脑疝;关节僵硬;耻骨骨折;腰椎骨折;四头肌和肌腱损伤;特指含硅[矽]粉尘肺尘埃沉着病;神经损伤;下肢静脉血栓形成;涉及使用特指康复操作医疗	好转	蒋松鹤	郑余银	黄世园
543	K06康复	2022-10-31	2022-11-30	3302144	滕云青	男	51Y	颈部脊髓特指损伤	四肢瘫痪;脊髓病性膀胱;神经源性肠;体位性低血压;涉及使用特指康复操作医疗;泌尿道感染;颈椎骨折;颈椎间盘突出;颈椎椎管狭窄;下肢静脉血栓形成;下肢动脉粥样硬化;下肢深静脉瓣膜机能不全;鼻骨骨折;颧骨骨折	好转	蒋松鹤	卢君艳	林乐2
544	K06康复	2022-10-30	2022-12-03	3303246	钱曼菲	女	72Y	踝关节僵硬	高血压病;2型糖尿病;帕金森病;涉及使用特指康复操作医疗;下肢静脉血栓形成;脂肪肝;Ⅰ度房室传导阻滞;颈椎关节强硬;外踝骨折;下肢动脉粥样硬化	好转	蒋松鹤	郑余银	高丽萍
545	K06康复	2022-11-09	2022-12-12	3306837	林超英	女	64Y	髋关节僵硬	坠积性肺炎;脊柱侧弯;下肢静脉曲张;下肢静脉血栓形成;涉及使用特指康复操作医疗;头部外伤;多发性肋骨骨折;股骨下端骨折;股骨粗隆间骨折;骨盆骨折	好转	蒋松鹤	郑余银	高丽萍
546	K06康复	2022-11-08	2022-12-19	3309350	夏丽芬	女	44Y	髋臼骨折	面部软组织挫伤;创伤性牙折断;腰椎骨折;骶骨骨折;耻骨骨折;手挫伤;膝挫伤;髋关节僵硬;抑郁症;涉及使用特指康复操作医疗;创伤后伤口感染;甲状腺肿;下肢静脉血栓形成	好转	蒋松鹤	郑余银	高丽萍
547	K06康复	2022-11-21	2022-12-21	3310465	徐月红	女	65Y	关节僵硬	大脑血管特指畸形;高血压病;2型糖尿病;多发性脑梗死;肺结节;下肢静脉血栓形成;创伤后伤口感染;颧骨骨折;上颌骨骨折;鼻骨骨折;骶骨骨折;结膜出血;创伤性蛛网膜下腔出血;创伤性硬膜外血肿;涉及使用特指康复操作医疗;腓骨骨折;桡骨下端骨折	好转	蒋松鹤	郑余银	郑力宇
548	K06康复	2022-11-12	2022-12-24	3311447	周芬芬	女	61Y	创伤性脑局灶出血	腰椎退行性病变;耻骨骨折;下肢静脉血栓形成;下肢动脉粥样硬化;大脑血管特指畸形;头皮裂伤;头皮血肿;创伤性蛛网膜下腔出血;外伤性硬脑膜下积液;创伤性硬膜下出血;脑挫伤;盆腔积液，女性;骶骨骨折;髋臼骨折	好转	蒋松鹤	郑余银	高丽萍
549	K06康复	2022-11-26	2022-12-26	3312273	林美珠	女	52Y	颈部脊髓损伤	多发性胸椎骨折;肩胛骨骨折;胫腓骨下端骨折;下肢静脉血栓形成;泌尿道感染;特指颈椎骨折;颈椎脱位;四肢瘫痪;脊髓病性膀胱;神经源性肠;体位性低血压;涉及使用特指康复操作医疗	好转	蒋松鹤	卢君艳	林乐2
550	N13CCU	2022-01-04	2022-01-17	3183554	周冬良	男	51Y	扩张型心肌病	急性肝衰竭;下肢静脉血栓形成;脂肪肝;肺部感染;肋骨骨折	好转	张素勤	邢大伟	钱鲁
551	N15心血管内科	2022-01-06	2022-01-13	3182136	陈彩妹	女	82Y	肺栓塞	下肢深静脉血栓形成;高脂血症;主动脉粥样硬化;下肢动脉粥样硬化;骨质疏松伴病理性骨折	好转	林丛	黄明远	潘嘉林
552	N15心血管内科	2022-05-02	2022-05-14	3224690	应金莲	女	89Y	肥厚型非梗阻性心肌病	类风湿性关节炎;后天性肾囊肿;心功能Ⅲ级;股动脉狭窄;陈旧性肋骨骨折;高血压病;脊柱侧弯;下肢动脉粥样硬化;颈动脉硬化;肺部感染;支气管扩张;下肢静脉血栓形成	好转	曾刚焕	张新民	叶盛
553	N15心血管内科	2022-10-24	2022-11-06	3292912	陈文翠	女	79Y	股骨颈骨折	特指手术后状态;支气管扩张伴感染;下肢动脉粥样硬化;下肢静脉血栓形成;冠状动脉粥样硬化性心脏病;急性冠脉综合征;肺动脉高压中度	治愈	林丛	黄明远	218339	人工股骨头置换术;髋关节镜下滑膜切除术;髋关节松解术
554	N17心血管内科	2022-10-17	2022-10-26	3288394	林天杰	男	82Y	急性心肌梗死	后天性肾囊肿;肺大泡;胆囊结石;脊柱压缩性骨折;腰椎间盘突出;主动脉瓣关闭不全;腰椎椎管狭窄;腰椎间盘变性;下肢静脉血栓形成;冠状动脉粥样硬化性心脏病;退行性主动脉瓣疾患;心功能Ⅱ级;颈动脉硬化;下肢动脉粥样硬化;骨质疏松;帕金森病	好转	李嘉	金戈	218336
首页	尾页
骨折+肺栓塞
序号	出院科室	入院日期	出院日期	病案号	病人	性别	年龄	主诊断	非主诊断	转归	主任	主治	住院	手术
					姓名					情况	医师	医师	医师	名称
1	C06肿瘤放化疗、神经康复	2022-05-25	2022-06-25	3240254	叶玉霞	女	82Y	肺栓塞	冠状动脉支架植入后状态;单纯性肾囊肿;特指肾盂积水;胆囊结石;下肢特指深部脉管静脉炎和血栓性静脉炎;特指动脉动脉粥样硬化;老年性脑萎缩;特定性运动功能发育障碍;2型糖尿病;陈旧性肋骨骨折;泌尿道感染;肺部感染;冠状动脉粥样硬化性心脏病	好转	刘宝华	商萍	吕德钊	下肢静脉滤器置入术
2	D06(ICU)	2022-01-02	2022-01-09	3180811	徐珠花	女	79Y	股骨粗隆间骨折	肺栓塞;肺部感染;骨折治疗后恢复期;高血压病;2型糖尿病;心功能不全	好转	龚裕强	张晓隆	胡建坚	股骨骨折闭合复位髓内针内固定术
3	D06(ICU)	2022-09-29	2022-10-07	3281105	林得清	男	87Y	创伤性脑出血	脑挫伤;颞骨骨折;高血压病;肺部感染;老年性脑萎缩;腔隙性脑梗死;创伤性硬膜外血肿;肺栓塞	好转	程碧环	林孟相	林孟相	颅骨骨瓣修补术
4	D07儿童骨科、骨盆外科	2022-03-06	2022-03-16	3203573	蔡娇妹	女	92Y	股骨粗隆间骨折	高血压病;2型糖尿病;下肢动脉粥样硬化;下肢动脉血栓形成;后天性肾囊肿;完全性右束支传导阻滞;肺栓塞;冠状动脉粥样硬化性心脏病	治愈	翁益民	翁益民	王特	股骨骨折闭合复位钢针内固定术
5	D08(骨病)	2022-01-21	2022-03-03	3198835	周星伟	男	55Y	桡骨下端骨折	头部伴颈部浅表损伤;胸部浅表损伤;尺骨茎突骨折;肺栓塞;创伤性气胸;头部外伤;开放性多发性损伤;肋骨骨折;肩胛骨骨折;颈椎骨折;胸椎骨折;腰椎骨折	治愈	张宇	陈成旺	薛星河	桡骨骨折切开复位钢板内固定术
6	D10(创伤2)	2022-11-28	2022-12-06	3304166	胡希斌	男	84Y	股骨粗隆间骨折	肺栓塞;下肢静脉血栓形成;前列腺增生;心力衰竭	好转	黄俊武	王鉴顺	218239	股骨骨折闭合复位钢针内固定术;股骨植骨术
7	D14(脊柱)	2021-12-28	2022-01-16	3183001	施美芳	女	63Y	脊椎前移	肺栓塞;后天性肾囊肿;肾结石;腰椎退行性病变;颈椎关节强硬;陈旧性胸椎骨折;骨质疏松;高血压病;肺部感染;胸腔积液	治愈	徐晖	王胜	王胜	脊椎骨折复位术;后入路腰椎融合术;椎弓根钉内固定术;腰椎椎板切除减压术
8	F03观察病房	2022-04-18	2022-04-29	3219567	刘贵美	男	78Y	创伤性鼻中隔血肿	脑梗死;上颌骨骨折;面部挫伤;头部外伤;肺栓塞;下肢静脉血栓形成;椎动脉狭窄;肠系膜静脉血栓形成;肺不张;高血压病;凝血障碍	治愈	陈莹	陈莹	陈莹
9	F06(急ICU)	2022-03-25	2022-03-26	3206943	黄国兴	男	81Y	肺栓塞	前列腺增生;肝囊肿;股骨颈骨折;阿尔茨海默病;脑血管病后遗症;高血压病;肺部感染;呼吸衰竭;咯血;支气管扩张	未愈	孙来芳	孙来芳	潘贤娟
10	F06(急ICU)	2022-04-06	2022-04-10	3212517	余禄秀	女	44Y	肺栓塞	脊柱压缩性骨折;缺氧缺血性脑病;慢性呼吸衰竭;下肢特指深部脉管静脉炎和血栓性静脉炎;猝死;肺部感染	死亡	孔万权	王征	王征	深静脉穿刺
11	H14呼吸内科	2022-04-11	2022-04-24	3217251	吴大贤	男	70Y	肺栓塞	下肢动脉粥样硬化;高血压病;胆囊结石;硬皮病性肺间质纤维化;肾结石;冠状动脉粥样硬化性心脏病;骨质疏松伴病理性骨折;椎动脉狭窄;脂肪肝;下肢静脉血栓形成;肺部感染;后天性肾囊肿	好转	夏晓东	夏晓东	林秀慧	腰椎骨折球囊扩张成形术
12	H14呼吸内科	2022-09-01	2022-09-14	3272773	徐莉莉	女	70Y	胸椎骨折	肺栓塞;胸椎退行性病变;腰椎退行性病变;腰椎间盘突出;后天性肾囊肿;下肢动脉粥样硬化;小腿挫伤	好转	夏晓东	邱章伟	邱章伟	胸椎骨折球囊扩张成形术
13	H14呼吸内科	2022-07-30	2022-09-30	3272272	管素蕊	女	82Y	肺栓塞	泌尿道感染;肝功能异常;粒细胞缺乏;消化道出血;阿尔茨海默病;后天性肾囊肿;间质性肺病;胆囊结石;鹰嘴骨折;下肢静脉血栓形成;下肢动脉粥样硬化;肺部感染;肝囊肿	治愈	徐慧	徐慧	王道会
14	H16血液内科	2021-11-29	2022-01-02	3178422	叶定前	男	68Y	多发性骨髓瘤	慢性肾衰竭;肺部感染;肺栓塞;肺结节;颈动脉硬化;胆囊息肉;肋骨骨折;下肢动脉粥样硬化	治愈	林颖	林颖	黄河2
15	N15心血管内科	2022-01-06	2022-01-13	3182136	陈彩妹	女	82Y	肺栓塞	下肢深静脉血栓形成;高脂血症;主动脉粥样硬化;下肢动脉粥样硬化;骨质疏松伴病理性骨折	好转	林丛	黄明远	潘嘉林
首页	尾页
