# Supplementary material for: Variable Rate of D-dimer Predicts Venous Thromboembolism in Postoperative Fracture Patients: A Single-Center Retrospective Cohort Study
Source: Research Square preprint supplement (doi:10.21203/rs.3.rs-7878480/v1), 2025-12-09
Supplement: Supplementary file 7 [file 9929fdf86a947cf728db2c75.xlsx]

## Sheet: Sheet1
序号	出院科室	入院日期	出院日期	病案号	病人	性别	年龄	主诊断	非主诊断	转归	主任	主治	住院	手术
					姓名					情况	医师	医师	医师	名称
1	A03康复	2022-01-15	2022-01-30	3187856	王磊	男	7Y	颅内损伤伴长时间昏迷	脑挫伤;手术后随诊检查;骨折治疗后恢复期;颅骨骨折;甲状腺肿伴囊性变;创伤性癫痫;支气管炎;眼睑发育不全;角膜变性;眼睑闭合不全	好转	陈翔	涂丰霞	陈珊
2	A03康复	2022-03-22	2022-04-04	3210220	刘灏喆	男	5Y	偏瘫	脑挫伤;颅骨骨折;急性支气管炎;创伤性硬膜外血肿;头皮血肿;创伤性脑出血;创伤性蛛网膜下腔出血;面神经麻痹	治愈	汤行录	涂丰霞	陈珊
3	A03康复	2022-01-08	2022-04-04	3210234	杨忙忙	男	10Y	颅内损伤伴长时间昏迷	顶骨骨折;脑挫伤;急性上呼吸道感染;肝功能异常;特指手术后状态;颅内出血;肺炎	好转	汤行录	刘婵	赵凯怡
4	A03康复	2022-03-23	2022-04-08	3211652	吴峻熙	男	3Y	特定性运动功能发育障碍	脑炎;特定性言语构音障碍;锁骨骨折;手足口病	好转	汤行录	刘婵	赵凯怡
5	A03康复	2022-04-09	2022-04-25	3217741	张绣绣	女	4Y	膝关节僵硬	骨折治疗后恢复期;特指手术后状态;颅骨骨折;耻骨骨折;颞骨骨折	好转	汤行录	刘婵	陈珊
6	A03康复	2022-04-19	2022-05-04	3221034	刘灏喆	男	5Y	偏瘫	硬膜外血肿;脑挫伤;颅骨骨折;脑出血;蛛网膜下腔出血;面神经麻痹	好转	汤行录	涂丰霞	陈珊
7	A03康复	2022-04-11	2022-05-31	3230933	朱有翔	男	3Y	创伤性颅内出血	脑挫伤;肺挫伤;头皮血肿;眼球挫伤;颅骨骨折;动眼神经损伤;肝损伤;颅腔积气;锁骨骨折;视神经损伤	好转	陈翔	刘婵	陈珊
8	A03康复	2022-05-11	2022-06-15	3236539	应昕晅	女	2Y	运动障碍	脑室出血;眶骨骨折;颅骨骨折;脑挫伤;头皮血肿;蛛网膜下腔出血	好转	汤行录	汤行录	赵凯怡
9	A03康复	2022-07-24	2022-08-10	3259067	应昕晅	女	2Y	脑挫伤	急性上呼吸道感染;运动障碍;颅骨骨折	好转	汤行录	刘婵	赵凯怡
10	A03康复	2022-08-02	2022-09-07	3270101	王欣怡	女	6Y	运动障碍	腹水;多发性颅骨骨折;颅腔积气;脑脊液漏;言语障碍;弥漫性轴索损伤;创伤性蛛网膜下腔出血;创伤性硬膜外血肿;急性上呼吸道感染;第六[展]神经麻痹	好转	陈翔	陈珊	黄婷婷2
11	A03康复	2022-10-09	2022-10-25	3287989	王欣怡	女	6Y	运动障碍	构音困难;手术后恢复期;脑挫伤;创伤性硬膜外血肿;第六[展]神经麻痹;多发性颅骨骨折	好转	汤行录	汤行录	赵凯怡
12	A03康复	2022-11-11	2022-12-29	3313270	林贤振	男	5Y	颅内损伤伴长时间昏迷	颅骨骨折;头皮血肿;多处挫伤;胆囊结石;运动障碍;创伤性蛛网膜下腔出血	好转	陈翔	陈珊	赵凯怡
13	A04(儿童icu)	2022-03-17	2022-03-18	3203991	梁乐	男	4Y	脑疝	硬膜下血肿;多器官功能障碍综合征(MODS);多发性颅骨骨折;头皮血肿;乳突炎;肺挫伤;特指手术后状态	未愈	严纯雪	金江兵	林威	颅骨骨折减压术;经颞叶脑内血肿清除术
14	A04(儿童icu)	2022-04-06	2022-04-19	3215810	陈紫欣	女	4Y	牙槽骨骨折	颈椎半脱位;下颌骨骨折;肺挫伤;面部软组织挫伤	好转	严纯雪	金江兵	卢露	皮肤和皮下坏死组织切除清创术
15	A04(儿童icu)	2022-04-14	2022-04-23	3217223	马靖琪	女	1Y	脑挫伤	肾上腺出血;颞骨骨折;肱骨骨折;肝损伤;肺挫伤;脾损伤;桡骨骨折	好转	严纯雪	金江兵	林蓓蓓2
16	A04(儿童icu)	2022-04-30	2022-06-16	3237018	刘佳一	女	1Y	创伤性蛛网膜下腔出血	尿崩症;慢性失血性贫血;重症肺炎;创伤性休克;脑挫伤;顶骨骨折;成人呼吸窘迫综合征;脑疝;皮下血肿	死亡	严纯雪	金江兵	林威	有创呼吸机治疗大于等于96小时
17	A04(儿童icu)	2022-07-04	2022-08-01	3255455	黄玉涵	男	1Y	创伤性蛛网膜下腔出血	颅内出血;颅骨骨折;眶骨骨折;脑疝;成人呼吸窘迫综合征;尿崩症;心脏停搏复苏成功;休克;呼吸机相关性肺炎;肺挫伤	治愈	南向珍	薛超超	唐震海
18	A04(儿童icu)	2022-08-07	2022-08-08	3258521	刘陈望	男	1Y	创伤性硬膜外出血	头皮血肿;脑疝;休克;尿崩症;创伤性硬膜下出血;创伤性蛛网膜下腔出血;颅骨骨折;颅内损伤	未愈	南向珍	薛超超	唐震海	颅骨骨瓣修补术;颅内血肿硬通道穿刺引流术;颅骨切除减压术
19	A04(儿童icu)	2022-10-24	2022-10-28	3289242	林贝淇	女	3Y	创伤性蛛网膜下腔出血	心脏特指损伤;枕骨骨折;脑疝;颅内损伤;脑室出血;颅骨骨折;颅腔积气;头皮血肿;肺挫伤	未愈	潘国权	南向珍	218245
20	A04(儿童icu)	2022-11-11	2022-11-12	3295176	林思帆	男	1Y	创伤性脾破裂	多发性颅骨骨折;硬膜下血肿;头皮血肿;脑疝;特指手术后状态;腹水;创伤性肾血肿;慢性失血性贫血;休克	未愈	南向珍	薛超超	218245	腹腔冲洗检查;脾切除术
21	A04(儿童icu)	2022-11-13	2022-11-13	3295672	刘子铭	男	4Y	肺挫伤	呼吸心跳骤停;创伤性血气胸;成人呼吸窘迫综合征;血容量不足性休克;肋骨骨折;肝损伤;腹水;皮肤挫伤	死亡	严纯雪	卢露	林威
22	A04(儿童icu)	2022-11-14	2022-11-15	3296066	林立人	男	5Y	脑干挫伤	呼吸心跳骤停;颅骨骨折;头皮血肿;肺挫伤;肝损伤;心肌损害;脑疝;慢性失血性贫血;休克;颅内出血	死亡	南向珍	薛超超	218245
23	A05儿科内分泌	2022-01-08	2022-01-16	3183143	吴卓航	男	12Y	创伤性关节病	陈旧性桡骨骨折;链球菌感染;陈旧性肱骨骨折;先天性肋骨特指畸形;脊柱侧弯	好转	陈敏广	叶晓华	上官瑶瑶	骨髓穿刺术（骨穿）
24	A05儿科内分泌	2022-01-30	2022-02-05	3189865	陈悠苒	女	3Y	支气管肺炎	手骨折	治愈	郑雯洁	叶晓华	上官瑶瑶
25	A05儿科内分泌	2022-03-07	2022-03-16	3203334	卢晓薇	女	10Y	骨结核	陈旧性骨盆骨折;脊柱侧弯;骨发育和生长的特指疾患;陈旧性肋骨骨折	好转	叶晓华	叶晓华	上官瑶瑶
26	A05儿科内分泌	2022-08-31	2022-09-08	3270644	陈依楚	女	6Y	与附着点炎症相关关节炎	腘窝囊肿;肱骨内髁骨折	好转	郑雯洁	郑雯洁	胡莹莹	骨髓穿刺术（骨穿）
27	A05儿科内分泌	2022-09-26	2022-10-06	3280869	庄安乔	女	9Y	重症肺炎	低T3综合征;肺纤维化;原发性肺动脉高压;应力性骨折;中央型房间隔缺损（卵圆孔型）;心功能不全;肝功能异常;呼吸衰竭;幼年型类风湿关节炎	好转	郑雯洁	叶晓华	胡莹莹
28	A05儿科内分泌	2022-10-08	2022-10-17	3284765	张可欣	女	4Y	糖尿病	尺骨桡骨闭合性骨折	好转	单小鸥	罗越	金佳蕙
29	A05儿科内分泌	2022-11-20	2022-11-24	3299785	刘杨菲	女	5Y	过敏性紫癜	肱骨髁上骨折	好转	郑雯洁	叶晓华	218248
30	A06(儿神)	2022-01-01	2022-02-06	3190702	管敬轩	男	7Y	细菌性脑膜炎	败血症;特指急性胃炎;粒细胞缺乏;额骨骨折;脑软化灶;脑外伤后综合征	治愈	叶秀云	施旭来	郑飞霞	腰椎穿刺
31	A06(儿神)	2022-03-23	2022-04-12	3212999	林晨骏	男	5Y	化脓性脑膜炎	筛窦骨折;面部软组织挫伤;头部外伤;面部裂伤	治愈	胡颖	胡颖	李丰	腰椎穿刺
32	A06(儿神)	2022-04-19	2022-04-25	3217951	金铮雅	男	4Y	化脓性脑膜炎	急性上呼吸道感染;脑疝;气胸;脑挫伤;颅骨骨折;蛛网膜下腔出血;硬膜下出血	好转	胡颖	胡颖	李丰	腰椎穿刺
33	A06(儿神)	2022-06-07	2022-07-02	3242698	汤若涵	女	4M	创伤性蛛网膜下腔出血	支气管肺炎;脑挫伤;顶骨骨折;癫痫	好转	焦颖	焦颖	梁忠杰
34	A06(儿神)	2022-07-08	2022-07-28	3253934	曾焕轩	男	6Y	肺挫伤	脑挫伤;肝损伤;多处挫伤;鼻骨骨折;眶骨骨折	好转	叶秀云	李秀翠	李秀翠
35	A07(儿消)	2022-08-07	2022-08-10	L0166861	杨若琳	女	1Y	特指急性胃炎	粒细胞缺乏;脑外伤后综合征;枕骨骨折	治愈	朱欢	朱欢	郑淑姿
36	A07(儿消)	2022-08-27	2022-09-02	3268176	胡纯林	男	7Y	慢性胃炎	胆囊结石;胫腓骨干骨折;面部血管瘤	好转	陈桧平	闫秀梅	潘冰婷	胃镜检查
37	A09(儿肾)	2022-01-09	2022-01-19	3184032	华依柔	女	5Y	巴特综合征	骨折治疗后恢复期;急性上呼吸道感染	好转	杨青	王德选	王德选
38	A09(儿肾)	2022-05-15	2022-05-26	3229054	杨千娴	女	13Y	泌尿道感染	胆囊结石;硬膜下血肿;枕骨骨折	治愈	杨宇真	陈敏广	陈敏广
39	A10(儿血)	2022-08-31	2022-09-30	3278820	周滏	男	2Y	急性淋巴细胞白血病	下肢骨折;药物性肝炎;房间隔缺损;急性上呼吸道感染	好转	王菊香	徐智胜	胡玲珑	骨髓穿刺术（骨穿）;椎管内注射封闭;静脉输注泵置入
40	A10(儿血)	2022-10-23	2022-10-28	3289151	陈宇浩	男	2Y	急性上呼吸道感染	锁骨骨折	治愈	王菊香	王菊香	陈敏3
41	A10(儿血)	2022-09-30	2022-11-01	3290755	周滏	男	2Y	恶性肿瘤维持性化学治疗	房间隔缺损;先天性心脏病;药物性肝炎;下肢骨折;急性淋巴细胞白血病	好转	王菊香	王菊香	陈敏3	骨髓穿刺术（骨穿）;椎管内注射封闭
42	A39儿传	2022-02-24	2022-02-27	3197193	林瑜馨	女	4Y	支气管肺炎	额骨骨折;头皮血肿;创伤性蛛网膜下腔出血;癫痫;肺挫伤;脑挫伤	好转	狄军波	狄军波	温正旺
43	A39儿传	2022-10-24	2022-10-30	3289997	柯俊浩	男	14Y	肝功能异常	视神经疾患;重度视力缺损，单眼;多发性骨折;额骨骨折;屈光不正	好转	狄军波	叶万定	叶万定
44	B03儿科综合	2022-10-11	2022-10-15	3283731	李正豪	男	5Y	急性化脓性扁桃体炎	锁骨骨折	治愈	黄爱蓉	革丽莎	黄婷婷3
45	B03儿科综合	2022-10-06	2022-10-18	3285297	范颖璇	女	3Y	支气管肺炎	骨折治疗后恢复期;慢性鼻窦炎	治愈	黄爱蓉	革丽莎	革丽莎
46	B04儿科呼吸	2022-08-20	2022-08-25	3265245	陈芠儒	男	7M	支气管肺炎	锁骨骨折	治愈	张海邻	温顺航	陈阳
47	B04儿科呼吸	2022-10-18	2022-10-22	3286544	黄祺钧	男	10Y	急性支气管炎	支气管哮喘，非危重;桡骨颈骨折	治愈	林立	温顺航	218385
48	B05儿科呼吸	2022-02-18	2022-02-25	3196422	项奕鸣	男	2Y	支气管肺炎	上肢骨折	好转	胡晓光	胡晓光	张乐乐
49	B05儿科呼吸	2022-05-13	2022-05-18	3226193	邹记民	男	3Y	吸入性肺炎	肱骨髁上骨折	治愈	董琳	王小明	孙王明
50	B05儿科呼吸	2022-06-29	2022-07-07	3245013	叶一诺	女	10Y	急性支气管炎	股骨下端骨折;脊髓性肌萎缩	治愈	胡晓光	胡晓光	潘晓宇
51	B06(儿传)	2022-09-25	2022-09-28	3277900	许家乐	男	4Y	手足口病	尺骨桡骨闭合性骨折	治愈	石海矾	温正旺	钟佩佩
52	C03眼科口腔	2025-12-25	2022-01-02	3178190	黄新环	男	46Y	眶骨骨折	肋骨骨折;颧骨骨折	治愈	韩晓辉	董志章	林达	眶骨骨折闭合复位术
53	C03眼科口腔	2025-12-29	2022-01-02	3178326	訾大葱	女	43Y	取除骨折内固定装置		其他	徐兴侨	肖进	胡孙强
54	C03眼科口腔	2025-12-24	2022-01-02	3178439	何建勇	男	31Y	下颌骨骨折		治愈	徐兴侨	肖进	胡孙强	下颌骨骨折切开复位内固定术
55	C03眼科口腔	2025-12-03	2022-01-02	3178474	王云清	男	48Y	胫骨骨折	多发性肋骨骨折;前列腺结石;脂肪肝;创伤性牙齿脱落;特指指骨骨折;上颌骨骨折;颧骨骨折;跟骨骨折;颅底骨折;多发性颅骨骨折	治愈	徐兴侨	肖进	胡孙强	指骨骨折切开复位钢板内固定术;上颌骨骨折切开复位固定术;眶骨骨折切开复位术;胫骨骨折切开复位钢板内固定术
56	C03眼科口腔	2025-12-15	2022-01-03	3178629	艾治民	男	32Y	眶骨骨折	颧骨骨折;结膜出血;上颌骨骨折	治愈	韩晓辉	董志章	林达	眶骨骨折闭合复位术
57	C03眼科口腔	2025-12-23	2022-01-04	3178836	朱德明	男	53Y	眶骨骨折	颧骨骨折	治愈	韩晓辉	韩晓辉	林达
58	C03眼科口腔	2025-12-12	2022-01-05	3179345	马龙	男	27Y	下颌骨骨折	头皮挫伤;胸部损伤;肺挫伤;皮肤挫伤;创伤性胸腔积液	好转	徐兴侨	肖进	胡孙强	下颌骨骨折切开复位内固定术
59	C03眼科口腔	2022-01-03	2022-01-05	3179562	吴作亮	男	63Y	股骨颈骨折	乙型病毒性肝炎;肝硬化	治愈	占恭豪	申帮利	申帮利
60	C03眼科口腔	2022-01-01	2022-01-08	3180435	饶舜宇	男	6Y	眼球破裂	眼睑和眼周区开放性伤口;眼内出血;眼睑裂伤;眶骨骨折	治愈	韩晓辉	董志章	骆伊丽	前房成形术;眼球破裂修补术
61	C03眼科口腔	2025-12-29	2022-01-10	3180918	曾荣刚	男	45Y	泪小管裂伤	眼睑裂伤;视神经损伤;眶骨骨折;颧骨骨折;上颌骨骨折	治愈	韩晓辉	韩晓辉	骆伊丽	上颌骨骨折切开复位固定术;眼睑裂伤缝合术;眼眶缺损修补术;内眦成形术;眶骨骨折闭合复位术
62	C03眼科口腔	2025-12-29	2022-01-10	3181149	朱芳芳	女	21Y	下颌骨骨折	肺挫伤	治愈	徐兴侨	肖进	胡孙强	下颌骨骨折切开复位内固定术
63	C03眼科口腔	2025-12-29	2022-01-11	3181426	周小琴	女	41Y	眶骨骨折	肱骨髁间骨折;颧骨骨折;前臂桡神经损伤;高血压病;肱骨髁上骨折;桡骨下端骨折	治愈	韩晓辉	韩晓辉	骆伊丽	桡骨骨折切开复位钢板内固定术;眶骨骨折闭合复位术;上颌骨骨折闭合复位术;颧骨骨折闭合复位术;肱骨骨折切开复位钢板内固定术
64	C03眼科口腔	2025-12-26	2022-01-12	3181665	鲁朝阳	男	31Y	视神经损伤	眶骨骨折;多发性面骨骨折;特指手术后状态	治愈	韩晓辉	韩晓辉	骆伊丽	视神经减压术;鼻内镜下眶减压术;颧骨骨折闭合复位术;眶骨骨折闭合复位术
65	C03眼科口腔	2022-01-08	2022-01-12	3181730	朱成攀	男	35Y	眶骨骨折		治愈	韩晓辉	董志章	骆伊丽	眶骨骨折闭合复位术
66	C03眼科口腔	2025-12-29	2022-01-15	3182771	李金闯	男	52Y	眶骨骨折	额骨骨折;胆囊切除术后状态;多发性面骨骨折;鼻损伤;眼睑裂伤;头皮挫伤;肺特指疾患	治愈	韩晓辉	韩晓辉	骆伊丽	额骨重建术;眶骨骨折闭合复位术
67	C03眼科口腔	2022-01-05	2022-01-19	3184353	姜娟妹	女	58Y	创伤性眶内异物	腰椎骨折;颈椎退行性病变;腰椎退行性病变;面部挫伤;胸部损伤;肺部感染;额骨骨折;眶骨骨折;眼睑挫伤;肋骨骨折;创伤性胸腔积液	治愈	韩晓辉	董志章	骆伊丽	眼内异物取出术
68	C03眼科口腔	2022-01-01	2022-01-20	3184477	张瑞	男	47Y	下颌骨骨折		治愈	肖进	徐兴侨	胡孙强	下颌骨骨折切开复位内固定术;皮肤和皮下组织非切除性清创
69	C03眼科口腔	2022-01-11	2022-01-20	3184552	何琴福	女	21Y	取除骨折内固定装置		其他	徐兴侨	肖进	胡孙强	下颌骨内固定物取出术
70	C03眼科口腔	2022-01-02	2022-01-22	3184902	陈光龙	男	53Y	眼球破裂	脉络膜脱离;无晶状体;虹膜损伤;上睑下垂;眼睑裂伤;面部裂伤;眶骨骨折;玻璃体出血;视网膜缺损;浆液性视网膜脱离	治愈	蔡剑秋	查屹	郭燕	皮肤和皮下组织非切除性清创;眶骨骨折切开复位术;筋膜缝合术;眼睑全层裂伤修补术;玻璃体腔药物注射术;眼球破裂修补术;视网膜激光凝固术;后入路玻璃体切割术
71	C03眼科口腔	2022-01-20	2022-01-23	3185691	林贤渊	男	11Y	下颌骨骨折		未愈		肖进	胡孙强
72	C03眼科口腔	2022-01-17	2022-01-23	3185693	周有翠	女	69Y	眼球破裂	眼睑裂伤;眼内出血;眶骨骨折;鼻骨骨折;脑动脉瘤;高血压病	治愈	郑穗联	夏哲人	郭燕	眼睑全层及睑缘裂伤修补术;眼球破裂修补术
73	C03眼科口腔	2022-01-26	2022-01-27	3186836	季浩轩	男	6Y	牙槽骨骨折		治愈		肖进	胡孙强	牙龈缝合术;乳牙拔除
74	C03眼科口腔	2022-01-22	2022-01-27	3187015	甘开娃	男	55Y	取除骨折内固定装置		其他	韩晓辉	韩晓辉	骆伊丽	面骨内固定物取出术
75	C03眼科口腔	2022-01-11	2022-01-29	3187446	诸葛品奇	男	11Y	下颌骨骨折		治愈		肖进	徐兴侨	下颌骨骨折切开复位内固定术
76	C03眼科口腔	2022-01-15	2022-01-29	3187511	邹全雄	男	51Y	颧骨骨折		治愈		肖进	胡孙强	颧骨骨折切开复位内固定术
77	C03眼科口腔	2022-02-05	2022-02-06	3190726	柯安妮	女	14Y	眶骨骨折	头部局部肿胀、肿物和肿块;眼挫伤;鼻骨骨折	未愈	郑海华	韩晓辉	骆伊丽
78	C03眼科口腔	2022-02-05	2022-02-08	3191405	林湘程	男	12Y	取除骨折内固定装置		其他	郑海华	韩晓辉	骆伊丽	面骨内固定物取出术
79	C03眼科口腔	2022-01-30	2022-02-13	3193512	张绍夏	男	57Y	眶骨骨折	上颌骨骨折;颧骨骨折;视神经损伤	治愈		徐兴侨	黄武	上颌骨骨折切开复位固定术;眶骨骨折闭合复位术
80	C03眼科口腔	2022-02-03	2022-02-14	3194367	曾阡纾	女	5Y	下颌骨骨折	颞下颌关节脱位	治愈		肖进	黄武	髁突摘除术;下颌骨骨折切开复位内固定术
81	C03眼科口腔	2022-02-12	2022-02-15	3194627	柯安妮	女	14Y	眶骨骨折	眼挫伤;鼻骨骨折	治愈	韩晓辉	董志章	骆伊丽	眶骨骨折闭合复位术
82	C03眼科口腔	2022-02-22	2022-02-27	3197292	项小宝	男	42Y	取除骨折内固定装置		其他	郑海华	韩晓辉	骆伊丽	面骨内固定物取出术
83	C03眼科口腔	2022-02-09	2022-03-03	3198540	李新梅	女	46Y	眼球破裂	呼吸道感染;眼睑裂伤;鼻骨骨折	治愈	郑穗联	查屹	郭燕	眼睑裂伤缝合术;眼球摘除伴义眼台置入术
84	C03眼科口腔	2022-02-14	2022-03-05	3199241	汤长考	男	46Y	眶骨骨折	面部挫伤;面部裂伤;肋骨骨折;上颌骨骨折;筛窦骨折;肱骨内髁骨折	治愈	韩晓辉	董志章	骆伊丽	眶骨骨折闭合复位术
85	C03眼科口腔	2022-02-22	2022-03-09	3201007	张健	男	24Y	上颌骨骨折		治愈		肖进	汪池	上颌骨骨折切开复位固定术;眶骨骨折切开复位术
86	C03眼科口腔	2022-02-20	2022-03-13	3202446	蔡福友	男	52Y	下颌骨骨折		治愈		徐兴侨	汪池	髁突摘除术;下颌骨骨折切开复位内固定术;髁突骨折切开复位内固定术
87	C03眼科口腔	2022-02-13	2022-03-14	3202793	周明光	男	59Y	眼球破裂	肋骨骨折;肺挫伤;创伤性蛛网膜下腔出血;眼睑裂伤;面部裂伤;特指颈椎骨折;颈部脊髓损伤;玻璃体损伤;创伤性脉络膜脱离;创伤性视网膜脱离	治愈	冯旺强	董志章	骆伊丽	外眦成形术;内眦成形术;眼球破裂修补术;眶外壁重建术;皮肤缝合术;眼睑裂伤缝合术
88	C03眼科口腔	2022-03-04	2022-03-14	3202801	杨功立	男	57Y	上颌骨骨折	下颌骨骨折	治愈		肖进	汪池	上颌骨骨折切开复位固定术
89	C03眼科口腔	2022-03-07	2022-03-15	3203218	黄小秀	女	46Y	眶骨骨折	视神经损伤;脊髓灰质炎后遗症	治愈	韩晓辉	董志章	骆伊丽	眶骨骨折闭合复位术
90	C03眼科口腔	2022-03-12	2022-03-16	3203572	汤中成	男	50Y	取除骨折内固定装置	上睑下垂	其他	韩晓辉	董志章	骆伊丽	面骨内固定物取出术
91	C03眼科口腔	2022-03-12	2022-03-16	3203634	李文界	男	42Y	眶骨骨折		治愈	韩晓辉	董志章	骆伊丽	眶骨骨折闭合复位术
92	C03眼科口腔	2022-03-04	2022-03-20	3204699	陈婉婉	女	46Y	下颌骨骨折	牙槽骨骨折	治愈		肖进	于跃远	牙槽骨折切开复位内固定术;上颌骨骨折切开复位固定术
93	C03眼科口腔	2022-03-18	2022-03-23	3205874	章力中	男	19Y	眶骨骨折		治愈	韩晓辉	董志章	骆伊丽	眶骨骨折闭合复位术
94	C03眼科口腔	2022-03-05	2022-03-26	3207204	白植灶	男	52Y	颧骨骨折	肋骨骨折;脑震荡	治愈		林露阳	汪池	颧骨骨折切开复位内固定术
95	C03眼科口腔	2022-03-19	2022-03-28	3207905	陈德银	男	42Y	泪小管裂伤	眼睑裂伤;眶骨骨折	治愈	韩晓辉	董志章	骆伊丽	内眦成形术;皮肤缝合术;泪小管吻合术
96	C03眼科口腔	2022-03-26	2022-03-29	3208157	胡荷红	女	67Y	取除骨折内固定装置	双眼白内障	其他	韩晓辉	杨顺海	骆伊丽	面骨内固定物取出术
97	C03眼科口腔	2022-03-17	2022-03-30	3208645	林畅	女	13Y	下颌骨骨折		治愈		肖进	汪池	下颌骨骨折切开复位内固定术
98	C03眼科口腔	2022-03-08	2022-03-31	3208955	路超	男	25Y	上颌骨骨折	牙龈裂伤;下颌骨骨折;脑挫伤;枕骨骨折	治愈		肖进	汪池	上颌骨骨折切开复位固定术;皮肤缝合术;下颌骨骨折切开复位内固定术
99	C03眼科口腔	2022-03-17	2022-04-03	3210059	冷和飞	男	25Y	眼球破裂	盲，单眼;眶骨骨折;颅腔积气;眼睑裂伤	治愈	冯旺强	杨顺海	骆伊丽	眼球破裂修补术;外眦成形术;筋膜缝合术;眼睑裂伤缝合术;眶骨骨折闭合复位术
100	C03眼科口腔	2022-04-02	2022-04-04	3210560	邵埈炀	男	5Y	唇裂伤	面部挫伤;下颌骨骨折	治愈		肖进	汪池	唇裂伤缝合术
101	C03眼科口腔	2022-04-04	2022-04-05	3210890	胡必楦	男	4Y	下颌骨骨折	面部软组织挫伤	未愈		肖进	汪池
102	C03眼科口腔	2022-03-28	2022-04-06	3211056	陈婷婷	女	20Y	下颌骨骨折	颞下颌关节脱位;颅底骨折	治愈		肖进	汪池	髁突摘除术;颅颌牵引
103	C03眼科口腔	2022-04-02	2022-04-08	3211567	邓超	男	23Y	取除骨折内固定装置		其他	郑海华	郑海华	郑海华	面骨内固定物取出术
104	C03眼科口腔	2022-03-14	2022-04-09	3211849	张绍军	男	58Y	眶骨骨折	胫腓骨干骨折;多发性面骨骨折;脊髓灰质炎后遗症;上颌骨骨折	治愈	韩晓辉	董志章	骆伊丽	胫骨骨折切开复位钢板内固定术;眶骨骨折闭合复位术;上颌骨骨折切开复位固定术
105	C03眼科口腔	2022-03-30	2022-04-09	3211975	程海霞	女	42Y	下颌骨骨折		治愈		肖进	汪池	下颌骨骨折切开复位内固定术
106	C03眼科口腔	2022-03-17	2022-04-11	3212634	刘谋平	男	42Y	下颌骨骨折		治愈		肖进	汪池	颅颌牵引
107	C03眼科口腔	2022-04-05	2022-04-16	3214429	楚毛旦	男	26Y	下颌骨骨折		治愈		肖进	汪池	髁突骨折切开复位内固定术;下颌骨骨折切开复位内固定术
108	C03眼科口腔	2022-04-04	2022-04-23	3217188	彭生政	男	48Y	眶骨骨折	黄斑裂孔;眼睑裂伤;视神经损伤	好转	郑海华	郑海华	郑海华	眶骨骨折闭合复位术
109	C03眼科口腔	2022-04-19	2022-04-24	3217546	林金生	男	65Y	眶骨骨折		好转	郑海华	郑海华	郑海华	眶骨骨折闭合复位术
110	C03眼科口腔	2022-04-18	2022-04-24	3217568	张煜	男	26Y	尺骨桡骨闭合性骨折		好转	赵友明	赵友明	柯陈荣	桡骨骨折切开复位钢板内固定术;尺骨骨折切开复位钢板内固定术
111	C03眼科口腔	2022-04-04	2022-04-25	3217857	宋万江	男	27Y	下颌骨骨折		治愈		肖进	汪池	下颌骨骨折切开复位内固定术
112	C03眼科口腔	2022-04-15	2022-04-26	3218355	付忠芬	女	50Y	翼状胬肉	取除骨折内固定装置	好转	韩晓辉	杨顺海	骆伊丽	面骨内固定物取出术;翼状胬肉切除术
113	C03眼科口腔	2022-04-22	2022-04-27	3218763	洪永恒	男	17Y	眶骨骨折	上颌骨骨折	治愈	韩晓辉	杨顺海	骆伊丽	眶骨骨折闭合复位术;上颌骨骨折切开复位固定术
114	C03眼科口腔	2022-04-22	2022-04-27	3218796	朱明共	男	41Y	眶骨骨折	颧骨骨折	好转	郑海华	郑海华	郑海华	眶骨骨折闭合复位术
115	C03眼科口腔	2022-04-14	2022-04-30	3219807	董韩誉	男	17Y	下颌骨骨折		治愈		肖进	汪池	髁突摘除术;下颌骨骨折切开复位内固定术
116	C03眼科口腔	2022-04-16	2022-04-30	3219849	金珍南	男	35Y	下颌骨骨折	桡骨下端骨折;癫痫;跟骨骨折	治愈		肖进	汪池	下颌骨骨折切开复位内固定术
117	C03眼科口腔	2022-04-19	2022-04-30	3219871	尚金会	女	16Y	下颌骨骨折		治愈		肖进	汪池	下颌骨骨折切开复位内固定术
118	C03眼科口腔	2022-04-28	2022-05-02	3220223	夏汉庆	男	36Y	眶骨骨折	颧骨骨折;上颌骨骨折;痛风;糖尿病	好转	韩晓辉	杨顺海	骆伊丽
119	C03眼科口腔	2022-04-22	2022-05-02	3220292	潘教群	男	65Y	眶骨骨折	面部裂伤;双眼白内障	治愈	韩晓辉	杨顺海	骆伊丽	眶骨骨折闭合复位术
120	C03眼科口腔	2022-04-11	2022-05-03	3220632	许贤法	男	55Y	眶骨骨折	鼻骨骨折;前列腺增生;眼睑裂伤;眼球挫伤;眼挫伤;高血压病;糖尿病;脂肪肝	治愈	韩晓辉	杨顺海	骆伊丽	眶骨骨折闭合复位术
121	C03眼科口腔	2022-04-19	2022-05-03	3220876	李照云	男	49Y	结膜裂伤	眶骨骨折;结膜出血;结合膜囊异物;眼挫伤	治愈	郑穗联	查屹	郭燕	结膜缝合术;眼内异物取出术;眶骨骨折闭合复位术
122	C03眼科口腔	2022-04-20	2022-05-04	3221051	黄朝新	男	57Y	颧骨骨折	颅腔积气;眼眶挫伤;脑挫伤;面骨骨折;糖尿病;肺结核	好转			汪池	颧骨骨折切开复位内固定术
123	C03眼科口腔	2022-04-16	2022-05-04	3221247	龚长友	男	32Y	眶骨骨折	上颌骨骨折;颧骨骨折;脊髓灰质炎后遗症	治愈	冯旺强	杨顺海	骆伊丽	颧骨骨折切开复位内固定术;眶骨骨折闭合复位术
124	C03眼科口腔	2022-04-26	2022-05-07	3222044	黄淑娟	女	32Y	下颌骨骨折	面部软组织挫伤	好转		肖进	黄武	下颌骨骨折切开复位内固定术
125	C03眼科口腔	2022-04-22	2022-05-07	3222080	陈晓群	女	36Y	眼球破裂	多发性面骨骨折;眶骨骨折;泪小管裂伤	治愈	韩晓辉	杨顺海	骆伊丽	内眦成形术;外眦成形术;眶骨骨折闭合复位术;眼球内容物剜出术
126	C03眼科口腔	2022-05-06	2022-05-14	3224521	叶伟俊	男	16Y	取除骨折内固定装置	视神经损伤	其他	冯旺强	杨顺海	骆伊丽	面骨内固定物取出术
127	C03眼科口腔	2022-05-06	2022-05-14	3224782	雷昌文	男	49Y	取除骨折内固定装置		其他	冯旺强	韩晓辉	骆伊丽	面骨内固定物取出术
128	C03眼科口腔	2022-05-03	2022-05-14	3224786	杨小龙	男	22Y	泪小管裂伤	面部裂伤;头皮裂伤;眼睑裂伤;鼻骨骨折	治愈	冯旺强	韩晓辉	骆伊丽	泪小管吻合术
129	C03眼科口腔	2022-05-03	2022-05-15	3225141	李显兰	女	55Y	玻璃体损伤	双眼白内障;特指手术后状态;创伤性晶状体脱位;肋骨骨折;腰椎骨折;颅骨骨折;眶骨骨折;下肢静脉血栓形成	好转	郑穗联	查屹	郭燕	后入路玻璃体切割术;白内障超声乳化摘除术+人工晶体植入术（微切口）
130	C03眼科口腔	2022-05-02	2022-05-18	3226333	高乐妙	女	46Y	眶骨骨折	牙槽骨骨折;鼻骨骨折;牙龈裂伤;肋骨骨折;特指手术后状态	治愈	韩晓辉	杨顺海	骆伊丽	眶骨骨折闭合复位术;上颌骨钛板置入术;上颌骨骨折切开复位固定术;上颌骨死骨切除术
131	C03眼科口腔	2022-05-13	2022-05-18	3226344	陈建明	男	44Y	取除骨折内固定装置		其他	韩晓辉	杨顺海	骆伊丽	面骨内固定物取出术
132	C03眼科口腔	2022-05-10	2022-05-21	3227181	李有方	男	19Y	下颌骨骨折	颧骨骨折;面部软组织挫伤	治愈		徐兴侨	黄武	下颌骨骨折切开复位内固定术
133	C03眼科口腔	2022-05-09	2022-05-21	3227193	戴利科	男	22Y	取除骨折内固定装置		其他			黄武	跟骨内固定物取出术;桡骨内固定物取出术;面骨内固定物取出术;跖骨内固定物取出术
134	C03眼科口腔	2022-05-11	2022-05-22	3227491	冉洪全	男	60Y	下颌骨骨折		治愈		徐兴侨	黄武	下颌骨骨折切开复位内固定术;颅颌牵引
135	C03眼科口腔	2022-04-24	2022-05-23	3228126	杨传道	男	47Y	胸椎骨折	颧骨骨折;下颌骨骨折;跖骨骨折;跟骨骨折	治愈		徐兴侨	黄武	脊椎骨折复位术;下颌骨钛板置入术;皮肤和皮下组织切开引流术;椎弓根钉内固定术;跟骨骨折切开复位钢针内固定术;下颌骨骨折切开复位内固定术;拔牙术
136	C03眼科口腔	2022-05-11	2022-05-24	3228475	刘爱柳	女	53Y	颧骨骨折	颅腔积气;面部软组织挫伤;眶骨骨折;上颌骨骨折	治愈		徐兴侨	黄武	颧骨骨折闭合复位术;眶骨骨折闭合复位术;皮肤和皮下组织非切除性清创
137	C03眼科口腔	2022-05-15	2022-05-25	3228752	邵余春	男	51Y	颧骨骨折		治愈	肖进	徐兴侨	黄武	颧骨骨折切开复位内固定术
138	C03眼科口腔	2022-05-20	2022-05-29	3230260	徐民超	男	15Y	取除骨折内固定装置		其他	冯旺强	韩晓辉	林达	面骨内固定物取出术
139	C03眼科口腔	2022-05-29	2022-06-04	3232232	许允根	男	19Y	取除骨折内固定装置		其他	冯旺强	杨顺海	林达	面骨内固定物取出术
140	C03眼科口腔	2022-05-29	2022-06-04	3232470	刘仁芬	女	20Y	眶骨骨折		治愈	韩晓辉	杨顺海	林达	眶骨骨折闭合复位术
141	C03眼科口腔	2022-05-23	2022-06-04	3232501	王家明	男	48Y	下颌骨骨折	多发性肋骨骨折;头部外伤;多处挫伤;腰椎骨折	治愈		徐兴侨	黄武	下颌骨骨折切开复位内固定术
142	C03眼科口腔	2022-06-04	2022-06-09	3234340	张景祥	男	42Y	眶骨骨折		治愈	冯旺强	韩晓辉	林达	眶骨骨折闭合复位术
143	C03眼科口腔	2022-06-11	2022-06-15	3236607	付康	男	18Y	取除骨折内固定装置		其他	韩晓辉	杨顺海	骆伊丽	面骨内固定物取出术
144	C03眼科口腔	2022-05-25	2022-06-19	3238024	谢纯友	男	66Y	眶骨骨折	牙槽骨骨折;创伤性牙折断;肾结石;颈椎间盘突出;颈椎退行性病变;高血压病;头部外伤;颈部脊髓损伤;面部裂伤;眼睑裂伤;上颌骨骨折;鼻骨骨折;额骨骨折	治愈	韩晓辉	杨顺海	林达	髋骨骨折切开复位螺钉内固定术;上颌骨骨折切开复位固定术
145	C03眼科口腔	2022-06-07	2022-06-22	3239107	李宁伟	男	32Y	下颌骨骨折	面部软组织挫伤	治愈			716816	颌下引流术;下颌骨骨折切开复位内固定术
146	C03眼科口腔	2022-06-11	2022-06-23	3239544	林玲	女	26Y	下颌骨骨折	面部挫伤;面部裂伤	治愈		肖进	716816	下颌骨骨折切开复位内固定术
147	C03眼科口腔	2022-06-19	2022-06-25	3240233	陈彤	女	18Y	视神经损伤	眶骨骨折;脑出血;头部外伤	好转	韩晓辉	杨顺海	骆伊丽	鼻内镜下眶减压术;鼻内窥镜下视神经减压术
148	C03眼科口腔	2022-06-12	2022-06-26	3240626	黄国宾	男	33Y	下颌骨骨折	面部挫伤;面部裂伤	好转		肖进	716816	下颌骨骨折切开复位内固定术;上颌骨骨折切开复位固定术
149	C03眼科口腔	2022-04-25	2022-06-27	3241064	周月雄	男	43Y	眼球破裂	眶骨骨折;上颌骨骨折;肺挫伤;眼睑裂伤;多处挫伤;多发性肋骨骨折;鼻骨骨折	治愈	韩晓辉	杨顺海	林达	眼球破裂修补术;眶骨骨折闭合复位术;上颌骨骨折切开复位固定术;眼内容物剜出伴巩膜内填充;眼睑裂伤缝合术
150	C03眼科口腔	2022-06-19	2022-06-28	3241530	夏江军	男	52Y	下颌骨骨折		治愈			716816	下颌骨骨折切开复位内固定术
151	C03眼科口腔	2022-06-17	2022-06-29	3241745	林海贞	女	46Y	下颌骨骨折	面部裂伤	治愈			716816	下颌骨骨折切开复位内固定术
152	C03眼科口腔	2022-06-14	2022-06-29	3242003	胡杰雄	男	20Y	眶骨骨折	鼻中隔偏曲;头部外伤;鼻损伤;多处挫伤;脂肪肝;上颌窦囊肿;鼻甲肥大;腺样体肥大	治愈	韩晓辉	杨顺海	林达	眶骨骨折闭合复位术
153	C03眼科口腔	2022-06-23	2022-07-02	3242598	黄显对	男	35Y	颧骨骨折	上颌骨骨折	治愈		肖进	716455	颧骨骨折切开复位内固定术
154	C03眼科口腔	2022-06-23	2022-07-04	3243863	刘海华	男	33Y	眶骨骨折	眼挫伤;多处挫伤;多发性肋骨骨折;胸部损伤	治愈	冯旺强	杨顺海	林达	眶骨骨折闭合复位术
155	C03眼科口腔	2022-06-28	2022-07-05	3244297	舒琴	女	23Y	下颌骨骨折		好转		肖进	716455	下颌骨骨折切开复位内固定术
156	C03眼科口腔	2022-06-26	2022-07-07	3245090	张鹏鹏	男	14Y	眶骨骨折	头部外伤;多处挫伤;急性上颌窦炎;上颌骨骨折	治愈	冯旺强	杨顺海	林达	上颌骨骨折切开复位固定术;眶骨骨折闭合复位术
157	C03眼科口腔	2022-07-02	2022-07-09	3245878	张东明	男	23Y	眶骨骨折	下肢静脉血栓形成;鼻骨骨折;上颌骨骨折	治愈	冯旺强	杨顺海	林达	上颌骨骨折切开复位固定术;眶骨骨折闭合复位术
158	C03眼科口腔	2022-07-11	2022-07-15	3248298	叶增怀	男	36Y	眼撕脱伤	泪小管裂伤;面部裂伤;额骨骨折	治愈	查屹	夏哲人	郭燕	内眦成形术;眼睑裂伤缝合术;鼻泪管探通术;泪小管吻合术
159	C03眼科口腔	2022-07-04	2022-07-16	3248618	胡海针	女	23Y	下颌骨骨折		治愈			716455	下颌骨骨折切开复位内固定术
160	C03眼科口腔	2022-07-03	2022-07-16	3248706	王光明	男	60Y	眶骨骨折	冠状动脉粥样硬化;胆囊息肉;后天性肾囊肿;上颌骨骨折;冠状动脉肌桥;晕厥和虚脱	治愈	韩晓辉	杨顺海	林达	上颌骨骨折闭合复位术;眶骨骨折闭合复位术
161	C03眼科口腔	2022-07-09	2022-07-16	3248727	季慧敏	女	23Y	下颌骨骨折		治愈			716455	下颌骨骨折切开复位内固定术
162	C03眼科口腔	2022-06-28	2022-07-18	3249492	王嘉华	男	20Y	眼球破裂	眼睑裂伤;眼内出血;眶骨骨折	治愈	冯旺强	杨顺海	林达	眼睑裂伤缝合术;眼球破裂修补术;外眦成形术;内眦成形术;玻璃体腔药物注射术
163	C03眼科口腔	2022-07-09	2022-07-19	3249965	郑建珍	男	41Y	眶骨骨折	晶状体不全脱位;双眼白内障	治愈	冯旺强	杨顺海	骆伊丽	眶骨骨折闭合复位术
164	C03眼科口腔	2022-07-10	2022-07-24	3252117	章鸿昊	男	3Y	下颌骨骨折	开放性唇部损伤;创伤性牙折断;头皮血肿;头部外伤	治愈		吴伟军	716816	髁突骨折切开复位内固定术;皮肤和皮下组织非切除性清创
165	C03眼科口腔	2022-07-11	2022-07-24	3252186	郑礼锋	男	40Y	上颌骨骨折	颧骨骨折;眶骨骨折	治愈			716816	眶骨骨折切开复位术;颧骨骨折切开复位内固定术;上颌骨骨折切开复位固定术
166	C03眼科口腔	2022-07-16	2022-07-27	3253368	艾治民	男	32Y	取除骨折内固定装置		其他	韩晓辉	董志章	林达	面骨内固定物取出术
167	C03眼科口腔	2022-07-22	2022-07-27	3253448	姜浩文	男	18Y	眶骨骨折		治愈	韩晓辉	董志章	林达	眶骨骨折闭合复位术
168	C03眼科口腔	2022-07-22	2022-07-27	3253509	郭乾	男	16Y	眶骨骨折	上颌骨骨折;鼻骨骨折;泪道阻塞;隐斜视	治愈	韩晓辉	杨顺海	林达	筋膜缝合术;上颌骨骨折切开复位固定术;眶骨骨折闭合复位术
169	C03眼科口腔	2022-07-28	2022-08-03	3256357	丁宇辰	男	4Y	下颌骨骨折		好转	聂鑫	肖进	716816
170	C03眼科口腔	2022-07-30	2022-08-08	3258243	曾荣刚	男	45Y	取除骨折内固定装置	睑球粘连;陈旧性面骨骨折;单眼白内障（右）	其他	韩晓辉	董志章	林达	内眦成形术;面骨内固定物取出术;筋膜缝合术;外眦成形术;眶骨骨折闭合复位术
171	C03眼科口腔	2022-07-28	2022-08-14	3260865	陈熙瑶	女	4Y	下颌骨骨折	骶骨骨折;尺骨骨折;胫腓骨下端骨折;跟骨骨折	治愈	聂鑫	聂鑫	黄武	下颌骨骨折切开复位内固定术
172	C03眼科口腔	2022-08-13	2022-08-18	3262368	孙春兰	女	65Y	眶骨骨折	眼球挫伤;双眼白内障	治愈	韩晓辉	董志章	林达	眶骨骨折闭合复位术
173	C03眼科口腔	2022-08-16	2022-08-20	3263149	陆爱斐	女	58Y	桡骨下端骨折	高血压病	治愈	洪建军	余洋	郑亦静	桡骨骨折切开复位钢板内固定术
174	C03眼科口腔	2022-07-22	2022-08-22	3264063	梁飞	男	37Y	创伤性晶状体脱位	眼球脱位;眼睑挫伤;眶骨骨折;继发于眼外伤的青光眼;玻璃体损伤;虹膜损伤	治愈	冯旺强	杨顺海	骆伊丽	视网膜剥离术;视网膜脱离复位术;后入路玻璃体切割术;外眦成形术;内眦成形术;眶骨骨折闭合复位术;筋膜缝合术;眼睑裂伤缝合术;玻璃体硅油置入术,用于视网膜再附着;视网膜激光凝固术
175	C03眼科口腔	2022-08-06	2022-08-24	3264729	林甜甜	女	15Y	颧骨骨折	眶骨骨折;面部损伤;后天性肾囊肿	治愈	韩晓辉	董志章	骆伊丽	眶骨骨折闭合复位术;眶骨骨折切开复位术;颧骨骨折切开复位术
176	C03眼科口腔	2022-08-20	2022-08-27	3265672	张金珠	女	50Y	眶骨骨折		治愈	韩晓辉	韩晓辉	骆伊丽	眶骨骨折闭合复位术
177	C03眼科口腔	2022-08-27	2022-08-27	3266077	黄东海	男	22Y	眶骨骨折		未愈	韩晓辉	韩晓辉	林达
178	C03眼科口腔	2022-08-15	2022-08-28	3266216	彭美玲	女	4Y	下颌骨骨折		治愈	聂鑫	徐兴侨	716816	髁突骨折切开复位内固定术
179	C03眼科口腔	2022-08-06	2022-08-28	3266293	黄国兴	男	51Y	下颌骨骨折		治愈	聂鑫	徐兴侨	716816	下颌骨骨折切开复位内固定术
180	C03眼科口腔	2022-08-17	2022-08-29	3266732	张林江	男	18Y	颧骨骨折	眶骨骨折;上颌骨骨折	治愈	聂鑫	徐兴侨	716816	眶壁骨折切开复位术;颧骨骨折切开复位内固定术
181	C03眼科口腔	2022-08-18	2022-08-30	3267186	王儒民	男	2Y	下颌骨骨折	颧骨骨折	治愈	聂鑫	聂鑫	716816	髁突骨折切开复位内固定术
182	C03眼科口腔	2022-08-03	2022-08-31	3267563	王克柳	女	76Y	颧骨骨折	视神经损伤;胸椎骨折;泪小管裂伤;颅内损伤;眶骨骨折;高血压病;股骨粗隆间骨折	治愈	聂鑫	聂鑫	716816	胸椎骨折球囊扩张成形术;股骨骨折闭合复位髓内针内固定术;颧骨骨折切开复位内固定术;眶壁骨折切开复位术
183	C03眼科口腔	2022-08-22	2022-08-31	3267661	饶立兴	男	51Y	眶骨骨折	多发性肋骨骨折;鼻骨骨折;上颌骨骨折;视力低下，单眼	好转	韩晓辉	韩晓辉	林达	筋膜缝合术;眶骨骨折闭合复位术
184	C03眼科口腔	2022-08-24	2022-09-03	3268569	郭苗苗	女	24Y	下颌骨骨折		治愈	聂鑫	徐兴侨	黄武	髁突骨折切开复位内固定术
185	C03眼科口腔	2022-08-24	2022-09-03	3268599	郑月友	男	54Y	下颌骨骨折	颌面间隙感染	治愈	聂鑫	徐兴侨	黄武	皮肤和皮下组织非切除性清创;下颌骨骨折切开复位内固定术
186	C03眼科口腔	2022-08-24	2022-09-04	3269132	万良义	男	51Y	颧骨骨折		治愈	聂鑫	徐兴侨	徐兴侨	颧骨骨折切开复位内固定术
187	C03眼科口腔	2022-08-14	2022-09-07	3270306	黎声富	男	29Y	眼球破裂	创伤性脉络膜脱离;创伤性视网膜脱离;无晶状体;眶骨骨折;会厌囊肿;眼睑裂伤;创伤性前房积血;玻璃体损伤	治愈	郑穗联	夏哲人	郭燕	后入路玻璃体切割术;前房冲洗术;眼睑缝合术;眼球破裂修补术;玻璃体硅油置入术,用于视网膜再附着;玻璃体腔气液交换术;视网膜激光凝固术;视网膜脱离复位术;视网膜剥离术
188	C03眼科口腔	2022-09-01	2022-09-10	3271365	黄志清	男	53Y	泪小管裂伤	创伤性气胸;胸椎骨折;腰椎骨折;结膜裂伤;眶骨骨折;眼睑裂伤;肋骨骨折	治愈	冯旺强	杨顺海	林达	耳廓皮肤和皮下组织非切除性清创;眼睑缝合术;内眦成形术;泪小管吻合术
189	C03眼科口腔	2022-09-05	2022-09-11	3271703	路超	男	25Y	取除骨折内固定装置		其他	聂鑫	肖进	黄武	面骨内固定物取出术
190	C03眼科口腔	2022-08-15	2022-09-12	3272141	邵再明	男	53Y	眶骨骨折	颧骨骨折;上颌骨骨折	治愈	聂鑫	龚裕强	黄武	暂时性气管切开术;颧骨骨折切开复位内固定术;上颌骨骨折切开复位固定术;眶骨骨折切开复位术
191	C03眼科口腔	2022-09-10	2022-09-13	3272303	夏胜松	男	77Y	单眼白内障（右）	肋骨骨折;单眼白内障（左）	治愈	蔡剑秋	夏哲人	郭燕	白内障超声乳化摘除术+人工晶体植入术（微切口）
192	C03眼科口腔	2022-09-06	2022-09-13	3272453	郑可欣	女	1Y	下颌骨骨折		治愈	聂鑫	徐兴侨	黄武	下颌骨骨折切开复位内固定术
193	C03眼科口腔	2022-09-03	2022-09-13	3272455	方海程	男	45Y	颧骨骨折	2型糖尿病	治愈	聂鑫	徐兴侨	黄武	颧骨骨折切开复位内固定术
194	C03眼科口腔	2022-09-05	2022-09-13	3272481	梁建民	男	56Y	泪小管裂伤	眼睑裂伤;面部裂伤;鼻骨骨折	治愈	韩晓辉	韩晓辉	林达	皮肤和皮下组织非切除性清创;内眦成形术;眼睑缝合术;泪小管探通术;泪小管吻合术
195	C03眼科口腔	2022-09-02	2022-09-17	3273646	李阿锡	男	56Y	眼球破裂	泪小管裂伤;上肢皮肤裂伤;高血压病;创伤性前房积血;眼睑裂伤;眶骨骨折	治愈	冯旺强	冯旺强	骆伊丽	眼内容物剜出伴巩膜内填充;筋膜缝合术;眶骨骨折切开复位术;眼睑缝合术;外眦成形术;内眦成形术
196	C03眼科口腔	2022-09-01	2022-09-18	3274329	邓丽	女	14Y	下颌骨骨折	足挫伤;面部挫伤;上颌骨骨折;锁骨骨折;胸锁关节脱位;髂骨骨折;骶骨骨折;耻骨骨折;颞下颌关节脱位;小腿挫伤	治愈	聂鑫	徐兴侨	黄武	锁骨骨折切开复位钢板内固定术;下颌骨骨折切开复位内固定术
197	C03眼科口腔	2022-09-12	2022-09-19	3274844	孟小涛	男	46Y	髋臼骨折	耻骨骨折;髂骨骨折	治愈	陈龙	应晓洲	应晓洲	骨盆骨折闭合复位术;骨盆螺钉内固定术
198	C03眼科口腔	2022-08-18	2022-09-21	3275672	万小马	男	28Y	眶骨骨折	额部血肿;创伤后伤口感染;上颌骨骨折;颧骨骨折;股骨干骨折	好转	韩晓辉	苟苏庆	林达	上颌骨骨折切开复位固定术;股骨牵引;股骨骨折切开复位髓内针内固定术;眶骨骨折切开复位术
199	C03眼科口腔	2022-09-12	2022-09-22	3275856	林小云	女	33Y	眶骨骨折	颧骨骨折;锁骨骨折	治愈	韩晓辉	杨顺海	骆伊丽	颧骨骨折切开复位内固定术;眶骨骨折切开复位术;锁骨骨折切开复位钢板内固定术
200	C03眼科口腔	2022-09-12	2022-09-22	3275857	张晓靖	男	38Y	眶骨骨折	额部血肿;额骨骨折	治愈	韩晓辉	杨顺海	骆伊丽	筋膜缝合术;眶骨骨折切开复位术
201	C03眼科口腔	2022-09-18	2022-09-22	3276084	李会林	男	43Y	泪小管裂伤	眼睑裂伤;鼻骨骨折	好转	郑穗联	郭燕	郭燕	眼睑缝合术;泪小管探通术;泪小管吻合术
202	C03眼科口腔	2022-08-30	2022-09-25	3276965	滕碎飞	女	53Y	眶骨骨折	颧骨骨折;创伤性硬膜外血肿;创伤性蛛网膜下腔出血;脑挫伤;锁骨骨折;肋骨骨折	治愈	韩晓辉	杨顺海	林达	锁骨人工骨植骨术;锁骨骨折切开复位钢板内固定术;颧骨骨折切开复位内固定术;眶骨骨折切开复位术
203	C03眼科口腔	2022-09-17	2022-09-25	3276986	胡宪洪	男	59Y	颧骨骨折	鼻骨骨折;创伤后伤口感染;面部挫伤	治愈	聂鑫	徐兴侨	黄武
204	C03眼科口腔	2022-09-19	2022-09-25	3276998	黄志清	男	54Y	眶骨骨折	泪小管裂伤;外伤性白内障	治愈	韩晓辉	杨顺海	林达	眶骨骨折闭合复位术
205	C03眼科口腔	2022-09-25	2022-09-30	3278983	冷和飞	男	26Y	取除骨折内固定装置	眼球萎缩;重度视力缺损，单眼	其他	韩晓辉	韩晓辉	林达	面骨内固定物取出术
206	C03眼科口腔	2022-09-25	2022-10-03	3280110	张绍夏	男	58Y	取除骨折内固定装置		其他	聂鑫	徐兴侨	汪池	面骨内固定物取出术
207	C03眼科口腔	2022-09-22	2022-10-04	3280358	杨方俭	男	47Y	下颌骨骨折		治愈	聂鑫	聂鑫	黄武	下颌骨骨折切开复位内固定术
208	C03眼科口腔	2022-09-15	2022-10-05	3280571	周新丹	女	13Y	下颌骨骨折		治愈	聂鑫	徐兴侨	黄武	下颌骨骨折切开复位内固定术
209	C03眼科口腔	2022-09-18	2022-10-06	3280784	徐云珠	女	63Y	下颌骨骨折		治愈	聂鑫	徐兴侨	黄武	髁突摘除术;下颌骨骨折切开复位内固定术
210	C03眼科口腔	2022-09-24	2022-10-09	3281680	雷金武	男	53Y	眼球挫伤	创伤性晶状体脱位;创伤性前房积血;玻璃体损伤;创伤性睫状体脱垂;外伤性白内障;眶骨骨折;2型糖尿病;肋骨骨折;肺挫伤;脑挫伤;颅腔积气	好转	韩晓辉	杨顺海	林达
211	C03眼科口腔	2022-10-06	2022-10-12	3282729	林畅	女	13Y	取除骨折内固定装置		其他	聂鑫	肖进	汪池	下颌骨内固定物取出术
212	C03眼科口腔	2022-09-28	2022-10-13	3283391	查胜军	男	43Y	眼球破裂	脑挫伤;开放性颅内异物;眶骨骨折	治愈	韩晓辉	杨顺海	林达	眼睑裂伤缝合术;筋膜缝合术;眶骨骨折切开复位术;颅骨切开异物取出术;眼球破裂修补术
213	C03眼科口腔	2022-10-05	2022-10-15	3283840	蔡冬玲	女	25Y	下颌骨骨折		治愈	聂鑫	肖进	汪池	下颌骨骨折切开复位内固定术
214	C03眼科口腔	2022-10-06	2022-10-17	3284776	郑晓	男	30Y	下颌骨骨折		治愈	聂鑫	肖进	汪池	下颌骨骨折切开复位内固定术
215	C03眼科口腔	2022-10-05	2022-10-18	3285188	蒋昕辰	男	6Y	下颌骨骨折		治愈	聂鑫	肖进	汪池	下颌骨骨折切开复位内固定术
216	C03眼科口腔	2022-09-29	2022-10-19	3285500	李锡勤	男	54Y	眶骨骨折	高血压病;眼挫伤;鼻骨骨折;眼眶挫伤;2型糖尿病性肾病;2型糖尿病性视网膜病变;高血压性视网膜病变;黄斑前膜	好转	韩晓辉	韩晓辉	林达	筋膜缝合术;眶壁骨折切开复位术
217	C03眼科口腔	2022-10-08	2022-10-22	3286583	张海兰	女	52Y	下颌骨骨折		治愈	聂鑫	肖进	汪池	下颌骨骨折切开复位内固定术;髁突摘除术
218	C03眼科口腔	2022-10-17	2022-10-24	3287737	林智强	男	21Y	下颌骨骨折	面部裂伤	治愈	聂鑫	肖进	汪池	髁突骨折切开复位内固定术;下颌骨骨折切开复位内固定术
219	C03眼科口腔	2022-09-28	2022-10-26	3288429	黄荣昌	男	39Y	玻璃体损伤	眼球萎缩;重度视力缺损，单眼;眶骨骨折	治愈	冯旺强	杨顺海	骆伊丽	玻璃体腔脱位晶状体取出术;玻璃体腔气液交换术;眼内容物剜出伴巩膜内填充;后入路玻璃体切割术
220	C03眼科口腔	2022-10-19	2022-10-26	3288630	卢顺道	男	86Y	眶骨骨折	额骨骨折;上颌骨骨折;眼睑挫伤;腔隙性脑梗死	好转	韩晓辉	韩晓辉	林达
221	C03眼科口腔	2022-10-23	2022-10-29	3289624	汪贵姑	女	43Y	上颌骨骨折	牙脱位	治愈	聂鑫	肖进	汪池	牙龈成形术;齿槽骨折闭合复位内固定术;皮肤和皮下组织非切除性清创
222	C03眼科口腔	2022-10-23	2022-10-29	3289750	张玲燕	女	34Y	鹰嘴骨折	脂肪肝	治愈	赵友明	赵友明	胡炜	石膏绷带固定;关节软骨修复术;尺骨骨折切开复位钢针内固定术
223	C03眼科口腔	2022-10-27	2022-10-29	3289757	王雨洁	女	6Y	踝骨闭合性骨折	病人决定不进行操作，特指原因	未愈	余可和	余可和	卢晓郎
224	C03眼科口腔	2022-10-23	2022-10-29	3289760	鲍宗本	男	40Y	桡骨头骨折	肱骨外髁骨折	治愈	赵友明	赵友明	胡炜	上肢关节囊缝合术;骨空隙填补物置入术;桡骨骨折切开复位钢针内固定术;肘关节镜下软骨修复术
225	C03眼科口腔	2022-10-13	2022-10-31	3290467	徐世祝	女	37Y	眶骨骨折	眼挫伤;肋骨骨折;面部软组织挫伤	好转	韩晓辉	韩晓辉	林达	眶骨骨折闭合复位术
226	C03眼科口腔	2022-10-11	2022-10-31	3290471	陈丽伟	男	44Y	眶骨骨折	眼损伤;眼睑裂伤;颧骨骨折;上颌骨骨折;面部软组织挫伤	好转	韩晓辉	韩晓辉	林达	上颌骨骨折切开复位固定术;颧骨骨折切开复位内固定术;眶骨骨折切开复位术
227	C03眼科口腔	2022-10-16	2022-10-31	3290487	林荣涛	男	13Y	上颌骨骨折	骶骨骨折;耻骨骨折;面部挫伤;创伤性牙齿脱落	治愈	聂鑫	洪建军	汪池	上颌骨骨折切开复位固定术;骨盆外固定架固定术;骨盆骨折闭合复位术
228	C03眼科口腔	2022-10-26	2022-10-31	3290535	陈浪	男	30Y	取除骨折内固定装置		其他	聂鑫	肖进	汪池	下颌骨内固定物取出术
229	C03眼科口腔	2022-10-31	2022-10-31	3290620	吴克波	男	33Y	翼状胬肉	额骨骨折;拇指骨折	治愈	查屹	夏哲人	郭燕	翼状胬肉切除伴角膜移植术
230	C03眼科口腔	2022-10-29	2022-11-01	3290825	黄新环	男	47Y	取除骨折内固定装置		其他	韩晓辉	杨顺海	林达	面骨内固定物取出术
231	C03眼科口腔	2022-10-22	2022-11-01	3290830	饶晓康	男	28Y	眶骨骨折	上颌骨骨折	治愈	韩晓辉	杨顺海	林达	上颌骨骨折切开复位固定术;眶骨骨折切开复位术
232	C03眼科口腔	2022-10-28	2022-11-02	3291458	谷定飞	男	55Y	眶骨骨折	中心性浆液性脉络膜视网膜病变;高血压病;2型糖尿病;后天性眼睑畸形	治愈	韩晓辉	董志章	林达	外眦成形术;筋膜缝合术;眶骨骨折切开复位术
233	C03眼科口腔	2022-10-31	2022-11-05	3292195	杨志强	男	49Y	泪小管断裂	眼睑裂伤;眶骨骨折	治愈	韩晓辉	董志章	林达	眼睑缝合术;鼻泪管插管术;泪小管吻合术
234	C03眼科口腔	2022-10-26	2022-11-05	3292338	杨荣俊	男	44Y	下颌骨骨折	上颌骨骨折;颞下颌关节脱位;面部软组织挫伤;肾结石	治愈	聂鑫	肖进	黄武	下颌骨骨折切开复位内固定术
235	C03眼科口腔	2022-10-25	2022-11-05	3292458	陈少瓯	女	36Y	眶骨骨折	颧骨骨折;上颌骨骨折	治愈	韩晓辉	冯旺强	林达	上颌骨骨折切开复位固定术;颧骨骨折切开复位内固定术;眶骨骨折切开复位术
236	C03眼科口腔	2022-10-29	2022-11-08	3293546	谢利元	男	45Y	眶骨骨折	脑震荡;鼻损伤;多发性肋骨骨折;拇指骨折;多处挫伤;肾结石;特指单个手指部分或完全切断	未愈	韩晓辉	董志章	林达
237	C03眼科口腔	2022-11-01	2022-11-09	3293865	王忠良	男	35Y	下颌骨骨折	面部软组织挫伤	治愈	聂鑫	聂鑫	716813	皮肤和皮下组织非切除性清创;下颌骨骨折切开复位内固定术
238	C03眼科口腔	2022-10-26	2022-11-09	3293982	汪金德	男	55Y	眶骨骨折	面部软组织挫伤;颈椎骨折;肺部感染;肺挫伤;头面颈部皮肤感染;颧骨骨折;上颌骨骨折;下颌骨骨折;精神障碍;脑挫伤;创伤性蛛网膜下腔出血;创伤性硬膜下出血;创伤性硬膜外出血;颅骨骨折;颅腔积气	治愈	韩晓辉	杨顺海	林达	眶骨骨折切开复位术;皮肤和皮下组织非切除性清创;下颌骨骨折切开复位内固定术;上颌骨骨折切开复位固定术;颧骨骨折切开复位内固定术
239	C03眼科口腔	2022-10-29	2022-11-10	3294377	支前进	男	39Y	上颌骨骨折		治愈	聂鑫	肖进	716813	上颌骨骨折切开复位固定术
240	C03眼科口腔	2022-11-08	2022-11-12	3294756	陈培文	女	49Y	取除骨折内固定装置		其他	陈华	陈华	蔡乐益	锁骨内固定物取出术
241	C03眼科口腔	2022-10-29	2022-11-12	3294888	阴代周	男	52Y	眼球破裂	创伤性前房积血;玻璃体损伤;创伤性脉络膜脱离;创伤性视网膜脱离;角膜损伤;眼睑裂伤;上颌骨骨折;鼻骨骨折	治愈	冯旺强	董志章	骆伊丽	前入路玻璃体切割术;玻璃体腔药物注射术;眼睑裂伤缝合术;眼球破裂修补术
242	C03眼科口腔	2022-11-08	2022-11-12	3295152	刘思淇	女	4Y	下颌骨骨折	上颌骨骨折;面部软组织挫伤;急性上颌窦炎;牙脱位	未愈	聂鑫	肖进	黄武
243	C03眼科口腔	2022-11-08	2022-11-13	3295416	卓素娟	女	64Y	肱骨上端骨折	肩关节脱位;肩袖损伤;肺部感染;创伤性胸腔积液;后天性肾囊肿	治愈	赵友明	胡炜	柯陈荣	肩袖修补术;肱骨骨折切开复位钢板内固定术
244	C03眼科口腔	2022-11-07	2022-11-13	3295463	吴梓诚	男	8Y	胫骨骨折		治愈	赵友明	胡炜	柯陈荣	胫骨骨折切开复位钢针内固定术
245	C03眼科口腔	2022-10-25	2022-11-15	3296276	王宝云	男	54Y	颧骨骨折	颈椎间盘突出;颈椎退行性病变;腰椎退行性病变;慢性肾小球肾炎;后天性肾囊肿;前列腺增生	治愈	聂鑫	聂鑫	716813	颧骨骨折切开复位内固定术
246	C03眼科口腔	2022-11-07	2022-11-15	3296320	庄子睿	男	4Y	肱骨外髁骨折	肱骨髁间骨折	治愈	余可和	余可和	卢晓郎	肱骨骨折切开复位钢针内固定术
247	C03眼科口腔	2022-11-04	2022-11-16	3296703	叶晓亮	男	41Y	上颌骨骨折	鼻骨骨折	治愈	聂鑫	聂鑫	716813	上颌骨骨折切开复位固定术
248	C03眼科口腔	2022-11-12	2022-11-16	3296793	郭志剑	男	35Y	眶骨骨折		治愈	韩晓辉	韩晓辉	林达	眶骨骨折切开复位术
249	C03眼科口腔	2022-11-05	2022-11-16	3296802	夏元权	男	49Y	眶骨骨折	颅腔积气;面部软组织挫伤;颧骨骨折;上颌骨骨折;脑挫伤;创伤性蛛网膜下腔出血	治愈	韩晓辉	林达	林达	上颌骨骨折切开复位固定术;颧骨骨折切开复位内固定术;眶骨骨折切开复位术
250	C03眼科口腔	2022-11-05	2022-11-17	3296938	何亮	男	27Y	眶骨骨折	颧骨骨折;眼球挫伤;上颌骨骨折	治愈	韩晓辉	林达	林达	上颌骨骨折切开复位固定术;眶骨骨折切开复位术
251	C03眼科口腔	2022-11-10	2022-11-17	3297094	邵曰霸	男	32Y	取除骨折内固定装置		其他	聂鑫	肖进	黄武	下颌骨内固定物取出术
252	C03眼科口腔	2022-11-08	2022-11-19	3297612	金小龙	男	28Y	外踝骨折	胫腓远端关节脱位	治愈	余可和	余可和	卢晓郎	踝关节融合术;踝关节骨折切开复位钢板内固定术
253	C03眼科口腔	2022-11-15	2022-11-19	3297887	张章宇	男	36Y	取除骨折内固定装置	脾大	其他	赵友明	赵友明	柯陈荣	椎骨内固定物取出术
254	C03眼科口腔	2022-11-12	2022-11-20	3298028	龚长友	男	33Y	取除骨折内固定装置	脊髓灰质炎后遗症	其他	韩晓辉	林达	林达	面骨内固定物取出术
255	C03眼科口腔	2022-11-10	2022-11-20	3298225	刘耀忠	男	42Y	下颌骨骨折	颧骨骨折	治愈	聂鑫	肖进	黄武	下颌骨骨折切开复位内固定术
256	C03眼科口腔	2022-11-12	2022-11-22	3299049	阮孔宝	男	63Y	锁骨骨折	肺炎;肺纤维化;颧骨骨折;上颌骨骨折;眶骨骨折;髌骨骨折;鼻骨骨折;小腿挫伤;多处挫伤;骨质疏松;高血压病;痛风;肺气肿;后天性肾囊肿;肝囊肿;下肢动脉粥样硬化;肺大泡	治愈	韩晓辉	林达	林达	髌骨开放性骨折清创术;锁骨骨折切开复位钢板内固定术
257	C03眼科口腔	2022-11-15	2022-11-24	3299680	吕建	男	31Y	拇趾骨折	前列腺结石;创伤后伤口感染;趾挫伤伴趾甲损坏;特指趾骨骨折	治愈	余可和	余可和	卢晓郎	趾骨骨折闭合复位钢针内固定术;皮肤和皮下组织非切除性清创;甲床去除术
258	C03眼科口腔	2022-11-16	2022-11-24	3299694	肖茂肘	男	63Y	髌骨骨折	下肢静脉曲张;膝关节炎;脂肪肝	治愈	余可和	余可和	卢晓郎	髌骨骨折切开复位张力带钢丝内固定术
259	C03眼科口腔	2022-11-12	2022-11-26	3300253	阮颂	男	38Y	上颌骨骨折		治愈	聂鑫	肖进	716813	下颌骨骨折切开复位内固定术;颧骨骨折切开复位内固定术
260	C03眼科口腔	2022-11-13	2022-11-26	3300363	傅乃清	男	54Y	眶骨骨折	颧骨骨折;颞骨骨折;高血压病;面部软组织挫伤;眼睑裂伤;上颌骨骨折	治愈	韩晓辉	杨顺海	林达	眶骨骨折切开复位术;颧骨骨折切开复位内固定术;上颌骨骨折切开复位固定术
261	C03眼科口腔	2022-11-17	2022-11-26	3300403	陈小娟	女	63Y	髌骨骨折	高血压病	治愈	余可和	余可和	卢晓郎	髌骨骨折切开复位张力带钢丝内固定术
262	C03眼科口腔	2022-11-20	2022-11-26	3300407	周爱玲	女	70Y	指骨骨折	肾钙化;主动脉瓣关闭不全;高血压病;脂肪肝	治愈	翁益民	翁益民	项光恒	指骨骨折切开复位钢板内固定术
263	C03眼科口腔	2022-11-24	2022-11-26	3300617	林文尉	男	45Y	眼睑裂伤	眶骨骨折;翼状胬肉	治愈	查屹	夏哲人	郭燕	眼睑裂伤缝合术;内眦成形术
264	C03眼科口腔	2022-11-16	2022-11-27	3300847	郑维铜	男	14Y	下颌骨骨折		好转	聂鑫	肖进	500765	下颌骨骨折切开复位内固定术
265	C03眼科口腔	2022-11-09	2022-11-28	3301355	叶昌德	男	74Y	眶骨骨折	双眼白内障;肩锁关节脱位;头皮血肿;颅底骨折;创伤性蛛网膜下腔出血;面部挫伤;多发性肋骨骨折;肺挫伤;创伤性胸腔积液;纵隔气肿;高血压病;2型糖尿病;创伤性皮下气肿;上颌骨骨折;颧骨骨折	治愈	韩晓辉	冯旺强	林达	肩锁关节脱位切开复位内固定术;颧骨骨折切开复位内固定术;上颌骨骨折切开复位固定术;眶骨骨折切开复位术
266	C03眼科口腔	2022-11-26	2022-11-30	3302122	董书来	男	30Y	眶骨骨折	眼球挫伤;上颌骨骨折	治愈	查屹	夏哲人	郭燕
267	C03眼科口腔	2022-11-20	2022-11-30	3302198	朱秀琴	女	84Y	股骨粗隆间骨折	高血压病;阿尔茨海默病	治愈	翁益民	翁益民	项光恒	肱骨骨折闭合复位髓内针内固定术
268	C03眼科口腔	2022-11-26	2022-12-03	3302872	江艳娥	女	43Y	肱骨上端骨折		治愈	杨雷	周一飞	218371	肱骨骨折切开复位钢板内固定术
269	C03眼科口腔	2022-11-26	2022-12-03	3302878	周乐翠	女	68Y	肱骨上端骨折	高血压病;2型糖尿病;脂肪肝	治愈	杨雷	周一飞	218371	肱骨骨折切开复位钢板内固定术
270	C03眼科口腔	2022-11-26	2022-12-04	3303470	何仕国	男	63Y	颧骨骨折		治愈	聂鑫	徐兴侨	716813	颧骨骨折切开复位内固定术
271	C03眼科口腔	2022-11-22	2022-12-04	3303475	李苏	女	31Y	下颌骨骨折		治愈	聂鑫	徐兴侨	716813	下颌骨骨折切开复位内固定术
272	C03眼科口腔	2022-11-19	2022-12-07	3304899	刘啟明	男	56Y	颧骨骨折	下颌骨骨折	治愈	聂鑫	徐兴侨	716813	颧骨骨折切开复位术;眶骨骨折切开复位术;牙槽骨折切开复位内固定术;下颌骨骨折切开复位内固定术
273	C03眼科口腔	2022-12-06	2022-12-07	3304994	应妤涵	女	8Y	尺骨桡骨远端骨折		好转	张敬东	李玉安	王伟
274	C03眼科口腔	2022-12-07	2022-12-10	3305959	何建武	男	37Y	下颌骨骨折		好转		肖进
275	C03眼科口腔	2022-12-06	2022-12-10	3305801	郑元娥	女	51Y	取除骨折内固定装置		其他	石成弟	胡炜	胡炜	髌骨内固定物取出术
276	C03眼科口腔	2022-12-06	2022-12-10	3305879	陈小霞	女	45Y	跖骨骨折	法洛四联症	治愈	石成弟	胡炜	胡炜	关节软骨修复术;跖骨骨折切开复位钢针内固定术
277	C03眼科口腔	2022-12-06	2022-12-10	3305915	丁爱华	女	63Y	取除骨折内固定装置	腰椎间盘突出;肝回声不均;肾结石;肺大泡	其他	洪建军	卢迪	卢迪	髌骨内固定物取出术
278	C03眼科口腔	2022-11-30	2022-12-10	3305971	余隆隆	男	26Y	眶骨骨折	眼挫伤	治愈	韩晓辉	杨顺海	林达	鼻骨骨折切开复位术;眶骨骨折切开复位术
279	C03眼科口腔	2022-11-28	2022-12-11	3306218	王智勇	男	45Y	下颌骨骨折	眶骨骨折	治愈	聂鑫	聂鑫	716804	下颌骨骨折切开复位内固定术
280	C03眼科口腔	2022-11-29	2022-12-11	3306276	蒋小芬	男	62Y	鼻骨骨折	上颌骨骨折	治愈	聂鑫	聂鑫	716804	鼻骨骨折切开复位术;眶骨骨折切开复位术
281	C03眼科口腔	2022-12-03	2022-12-13	3307081	黄雪飞	女	41Y	颧骨骨折		治愈	聂鑫	徐兴侨	716813	颧骨骨折切开复位内固定术
282	C03眼科口腔	2022-12-09	2022-12-14	3307625	金其林	女	39Y	三踝骨折	肺纤维化;胫腓远端关节脱位	治愈	洪建军	余可和	卢迪	踝关节脱位切开复位术;踝关节骨折切开复位钢板内固定术
283	C03眼科口腔	2022-11-16	2022-12-15	3307909	吴帅	男	28Y	上颌骨骨折	下颌骨骨折;颧骨骨折;眶骨骨折	治愈	聂鑫	聂鑫	716804	皮肤和皮下坏死组织切除清创术;筋膜间隙切开减压术;上颌骨骨折切开复位固定术;下颌骨骨折切开复位内固定术;皮肤和皮下组织非切除性清创
284	C03眼科口腔	2022-12-05	2022-12-17	3308470	张有为	男	9Y	眶骨骨折	颅腔积气;额骨骨折;多处挫伤	治愈	冯旺强	董志章	218379	眶骨骨折切开复位术
285	C03眼科口腔	2022-12-10	2022-12-17	3308478	孔祥骐	男	23Y	眶骨骨折	上颌骨骨折;颧骨骨折	好转	韩晓辉	韩晓辉	218379	上颌骨骨折切开复位固定术;眶骨骨折切开复位术
286	C03眼科口腔	2022-12-01	2022-12-17	3308620	周云涛	男	10Y	下颌骨骨折		治愈	聂鑫	肖进	716813	下颌骨骨折切开复位内固定术
287	C03眼科口腔	2022-12-11	2022-12-19	3309368	王秀英	女	45Y	眶骨骨折		好转	冯旺强	苟苏庆	林达	眶骨骨折切开复位术
288	C03眼科口腔	2022-12-17	2022-12-21	3310468	周祥锐	男	16Y	眶骨骨折	上颌骨骨折;颧骨骨折	治愈	韩晓辉	韩晓辉	218379	上颌骨骨折切开复位固定术;眶骨骨折切开复位术
289	C03眼科口腔	2022-12-12	2022-12-24	3311320	李文军	男	32Y	孔源性视网膜脱离	玻璃体出血;增生性玻璃体视网膜病变;胫腓骨干骨折;尺骨桡骨骨干骨折	治愈	冯旺强	董志章	林达	后入路玻璃体切割术;白内障超声乳化抽吸术;视网膜剥离术;视网膜激光凝固术;玻璃体硅油置入术,用于视网膜再附着;玻璃体腔气液交换术;视网膜脱离电凝术;视网膜脱离复位术
290	C03眼科口腔	2022-12-05	2022-12-24	3311446	赵守祯	男	47Y	眼球破裂	视神经损伤;眶骨骨折;创伤性视网膜脱离;玻璃体损伤;单眼白内障（右）	治愈	冯旺强	董志章	林达	白内障超声乳化抽吸术;玻璃体腔气液交换术;玻璃体硅油置入术,用于视网膜再附着;前房成形术;鼻内窥镜下视神经减压术;鼻内镜下眶减压术;玻璃体穿刺抽液术;眼睑裂伤缝合术;眼球破裂修补术;视网膜激光凝固术;视网膜脱离复位术;后入路玻璃体切割术
291	C03眼科口腔	2022-12-18	2022-12-28	3312945	胡秀琴	女	55Y	眶骨骨折	上颌骨骨折;颧骨骨折;脑震荡;面部软组织挫伤;肺大泡	治愈	韩晓辉	杨顺海	林达	上颌骨骨折切开复位固定术;眶骨骨折切开复位术
292	C03眼科口腔	2022-12-15	2022-12-29	3313584	郭志学	男	41Y	眶骨骨折	桡骨下端骨折;手舟状骨骨折;多处挫伤;上颌骨骨折;颧骨骨折;筛窦骨折;眶骨骨折;眼睑裂伤;鼻骨骨折;开放性唇部损伤;肋骨骨折;肺挫伤;创伤性气胸;肩部挫伤	治愈	郑海华	韩晓辉	林达	上颌骨骨折切开复位固定术;颧骨骨折切开复位内固定术;眶骨骨折切开复位术
293	C03眼科口腔	2022-12-25	2022-12-31	3314107	季慧敏	女	23Y	取除骨折内固定装置		其他	聂鑫	徐兴侨	500765	下颌骨内固定物取出术
294	C03眼科口腔	2022-12-19	2022-12-31	3314146	徐仲洁	男	38Y	上颌骨骨折	鼻骨骨折;牙槽骨骨折	治愈	聂鑫	聂鑫	500764	上颌骨骨折切开复位固定术
295	C04综合病房	2025-12-25	2022-01-02	3178177	周书啊	女	30Y	肝损伤	骨盆骨折;颅骨骨折;慢性乙型病毒性肝炎;胸腔积液;头皮血肿;脊柱骨折	好转	倪仲琳	黄和	姚志超
296	C04综合病房	2022-01-05	2022-01-07	3179965	赵春华	女	46Y	取除骨折内固定装置		其他	余可和	余可和	卢晓郎	髌骨内固定物取出术
297	C04综合病房	2025-12-15	2022-01-08	3180125	周吉相	男	47Y	创伤性小肠破裂	液气胸;多发性肋骨骨折;脐疝;高血压病;阑尾结石;尺骨桡骨闭合性骨折;急性弥漫性腹膜炎	治愈	王飞海	周磊	周磊	小肠破裂修补术;桡骨骨折切开复位术;腹腔冲洗检查;尺骨骨折切开复位术
298	C04综合病房	2022-01-11	2022-01-13	3182009	邹玉荣	男	46Y	取除骨折内固定装置	肺结节	其他	陈龙	陈龙	应晓洲	跟骨内固定物取出术
299	C04综合病房	2022-01-15	2022-01-17	3183412	游慧英	女	30Y	取除骨折内固定装置		其他	陈龙	陈龙	应晓洲	踝关节内固定物取出术
300	C04综合病房	2022-01-17	2022-01-19	3184252	苏佳飞	女	30Y	取除骨折内固定装置	肾结石;脂肪肝	其他	杨雷	周一飞	张月雷	踝关节内固定物取出术
301	C04综合病房	2022-01-18	2022-01-20	3184536	林贤仲	男	29Y	取除骨折内固定装置	肾结石;后天性肾囊肿	其他	陈龙	陈龙	应晓洲	股骨内固定物取出术
302	C04综合病房	2022-01-18	2022-01-20	3184574	韩荣来	男	48Y	取除骨折内固定装置	脂肪肝;前列腺结石;后天性肾囊肿	其他	余可和	余可和	卢晓郎	趾骨内固定物取出术
303	C04综合病房	2022-01-20	2022-01-22	3185028	李康益	男	39Y	取除骨折内固定装置		其他	杨雷	周一飞	张月雷	跖骨内固定物取出术
304	C04综合病房	2022-01-22	2022-01-23	3185661	方福仁	男	53Y	取除骨折内固定装置		其他	陈龙	陈龙	应晓洲	锁骨内固定物取出术
305	C04综合病房	2022-01-22	2022-01-24	3185858	李孝岳	男	34Y	取除骨折内固定装置	2型糖尿病;脂肪肝;肾错构瘤	其他	陈龙	陈龙	应晓洲	胫骨内固定物取出术
306	C04综合病房	2022-01-08	2022-01-24	3185969	李天武	男	59Y	创伤性脾破裂	开放性胸部损伤;创伤性气胸;肺结核，痰培养（-）;肋骨骨折;腹水	治愈	王飞海	周磊	周磊	腹腔冲洗检查;脾切除术
307	C04综合病房	2022-01-22	2022-01-24	3185983	邹修彬	男	46Y	取除骨折内固定装置		其他	陈龙	陈龙	应晓洲	跟骨内固定物取出术
308	C04综合病房	2022-01-22	2022-01-25	3186139	田碧友	男	54Y	取除骨折内固定装置		其他	陈龙	陈龙	应晓洲	股骨内固定物取出术
309	C04综合病房	2022-01-24	2022-01-25	3186296	陈孝坦	男	48Y	取除骨折内固定装置		其他	杨雷	周一飞	张月雷	桡骨内固定物取出术
310	C04综合病房	2022-01-24	2022-01-26	3186640	蔡仁德	男	37Y	取除骨折内固定装置		其他	王振文	水小龙	何自力	跟骨内固定物取出术
311	C04综合病房	2022-01-25	2022-01-27	3186949	黄孝灵	男	38Y	取除骨折内固定装置	后天性肾囊肿	其他	陈龙	陈龙	应晓洲	肱骨内固定物取出术
312	C04综合病房	2022-01-25	2022-01-27	3187063	王国荣	男	56Y	取除骨折内固定装置	脂肪肝;后天性肾囊肿;前列腺结石	其他	陈龙	陈龙	应晓洲	股骨内固定物取出术
313	C04综合病房	2022-01-26	2022-01-27	3187105	叶程鸿	男	23Y	取除骨折内固定装置		其他	王振文	水小龙	何自力	踝关节内固定物取出术
314	C04综合病房	2022-01-26	2022-01-28	3187163	张爱亲	男	33Y	取除骨折内固定装置		其他	王振文	水小龙	何自力	踝关节内固定物取出术
315	C04综合病房	2022-01-25	2022-01-29	3187640	蒋海	男	31Y	肩锁关节脱位	肱骨上端骨折;肩胛骨骨折;鹰嘴骨折	治愈	杨雷	周一飞	张月雷	肩锁关节脱位切开复位内固定术
316	C04综合病房	2022-01-26	2022-01-29	3187652	王孝文	男	48Y	取除骨折内固定装置	胆囊息肉	其他	杨雷	周一飞	张月雷	股骨内固定物取出术
317	C04综合病房	2022-01-29	2022-01-31	3188283	郑加波	男	68Y	取除骨折内固定装置	前列腺增生;肝囊肿;肾结石;肾错构瘤;特指手术后状态	其他	陈龙	陈龙	应晓洲	髌骨内固定物取出术
318	C04综合病房	2022-01-29	2022-01-31	3188473	陈绍梯	男	55Y	取除骨折内固定装置		其他	陈龙	陈龙	应晓洲	胫骨内固定物取出术
319	C04综合病房	2022-01-05	2022-02-01	3188796	韩巧云	女	46Y	创伤性结肠破裂	耻骨骨折;尺骨骨折;腕骨骨折;肌肉损伤;失血性休克;腹水;创伤性腹膜后血肿;尿道损伤;股骨颈骨折;骶骨骨折;创伤性气胸;髋臼骨折;腰椎骨折;桡骨骨折	好转	吴伟军	吴伟军	吴伟军	结肠暂时性造口术;股骨骨折闭合复位术;乙状结肠破裂修补术;腹壁切开引流术;尺骨骨折切开复位术;腹腔冲洗检查;桡骨骨折切开复位术
320	C04综合病房	2022-01-31	2022-02-02	3189179	周妙青	男	36Y	取除骨折内固定装置	脂肪肝;肝囊肿;肾结石;前列腺结石	其他	赵友明	赵友明	柯陈荣	桡骨内固定物取出术;肩锁关节内固定物取出术
321	C04综合病房	2022-01-21	2022-02-06	3190626	闪尹章	男	34Y	创伤性肠系膜血管损伤	开放性腹部损伤;腹腔积血;肋骨骨折;肝功能异常;高血压病;肺部感染	治愈	吴伟军	吴伟军	吴伟军	腹腔冲洗检查;腹壁血管结扎术;结肠破裂修补术
322	C04综合病房	2022-02-02	2022-02-07	3191115	王奥	男	9Y	取除骨折内固定装置		其他	杨雷	周一飞	张月雷	桡骨内固定物取出术
323	C04综合病房	2022-02-08	2022-02-10	3192161	叶宣林	男	41Y	取除骨折内固定装置	后天性肾囊肿;肾结石	其他	陈龙	陈龙	应晓洲	锁骨内固定物取出术
324	C04综合病房	2022-02-08	2022-02-10	3192172	朱坤宠	男	33Y	取除骨折内固定装置		其他	陈龙	陈龙	应晓洲	桡骨内固定物取出术;尺骨内固定物取出术
325	C04综合病房	2022-02-08	2022-02-10	3192174	温爱眉	女	53Y	取除骨折内固定装置		其他	陈龙	陈龙	应晓洲	桡骨内固定物取出术
326	C04综合病房	2022-02-08	2022-02-10	3192179	王雪	女	35Y	取除骨折内固定装置		其他	陈龙	陈龙	应晓洲	踝关节内固定物取出术
327	C04综合病房	2022-02-09	2022-02-11	3192708	顾克渺	男	36Y	取除骨折内固定装置	肾结石	其他	陈龙	陈龙	应晓洲	股骨内固定物取出术
328	C04综合病房	2022-02-09	2022-02-11	3192719	张谨龙	男	50Y	取除骨折内固定装置	高血压病	其他	陈龙	陈龙	应晓洲	跟骨内固定物取出术
329	C04综合病房	2022-02-11	2022-02-13	3193737	陈彬彬	男	10Y	取除骨折内固定装置		其他	杨雷	周一飞	张月雷	胫骨内固定物取出术
330	C04综合病房	2022-02-12	2022-02-14	3193976	赵逸涵	男	11Y	取除骨折内固定装置		其他	陈龙	陈龙	应晓洲	锁骨内固定物取出术
331	C04综合病房	2022-02-22	2022-02-24	3196291	魏树新	男	34Y	取除骨折内固定装置	后天性肾囊肿;脂肪肝	其他	陈龙	陈龙	应晓洲	桡骨内固定物取出术;尺骨内固定物取出术
332	C04综合病房	2022-02-07	2022-02-26	3196795	应永队	男	53Y	肝损伤	胆囊结石;腹腔积血;失血性休克;肋骨骨折;胸腔积液	治愈	倪仲琳	黄和	姚志超	肝修补术;腹腔冲洗检查;肠粘连松解术;剖腹探查术
333	C04综合病房	2022-02-26	2022-02-27	3196989	许建财	男	39Y	骨折畸形愈合	矫形外科用装置安装和调整;胫骨骨折	治愈	陈龙	陈龙	应晓洲	胫骨外固定架固定术
334	C04综合病房	2022-02-26	2022-02-28	3197393	张德生	男	55Y	取除骨折内固定装置	胆囊息肉;脂肪肝;继发性甲状腺功能减退症	其他	陈龙	陈龙	应晓洲	胫骨内固定物取出术
335	C04综合病房	2022-02-26	2022-02-28	3197394	薛文显	男	56Y	取除骨折内固定装置	骨折治疗后恢复期	其他	陈龙	陈龙	应晓洲	锁骨内固定物取出术
336	C04综合病房	2022-02-26	2022-02-28	3197416	王运弟	男	56Y	取除骨折内固定装置	脂肪肝	其他	陈龙	陈龙	应晓洲	肱骨内固定物取出术
337	C04综合病房	2022-03-02	2022-03-04	3198899	王浩熳	女	7Y	取除骨折内固定装置		其他	余可和	余可和	卢晓郎	胫骨内固定物取出术
338	C04综合病房	2022-02-17	2022-03-06	3199763	何英	女	38Y	创伤性小肠破裂	腰椎骨折;腹水;急性弥漫性腹膜炎;结肠损伤	治愈	王飞海	周磊	周磊	横结肠破裂修补术;腹腔冲洗检查;小肠吻合修正术
339	C04综合病房	2022-03-05	2022-03-06	3199884	董爱勤	女	54Y	取除骨折内固定装置		其他	陈龙	陈龙	应晓洲	尺骨内固定物取出术
340	C04综合病房	2022-03-05	2022-03-07	3200117	陈启云	男	49Y	取除骨折内固定装置	脂肪肝;表皮囊肿	其他	陈龙	陈龙	应晓洲	皮下组织病损切除术;腓骨内固定物取出术
341	C04综合病房	2022-03-07	2022-03-08	3200522	苏宗俭	男	72Y	下肢深静脉血栓形成	脊髓损伤;骨折治疗后恢复期;气管造口状态;胸腔积液;高血压病;肺部感染	治愈	邓超频	陈聪	陈魁	股静脉穿刺术;下腔静脉滤器置入术
342	C04综合病房	2022-03-03	2022-03-08	3200697	钱宇	男	43Y	肠梗阻	截瘫;褥疮;骨折治疗后恢复期	治愈	倪仲琳	黄和	潘传孟
343	C04综合病房	2022-03-08	2022-03-10	3201339	朱俊	男	22Y	取除骨折内固定装置	肝钙化灶;肾结石	其他	陈龙	陈龙	应晓洲	胫骨内固定物取出术;股骨内固定物取出术
344	C04综合病房	2022-03-08	2022-03-10	3201341	陈胜	男	43Y	取除骨折内固定装置	慢性乙型病毒性肝炎;肝硬化	其他	陈龙	陈龙	应晓洲	锁骨内固定物取出术
345	C04综合病房	2022-03-08	2022-03-10	3201414	沈勤西	男	49Y	取除骨折内固定装置	脂肪肝;前列腺结石	其他	余可和	余可和	卢晓郎	瘢痕松解术;胫骨内固定物取出术
346	C04综合病房	2022-03-09	2022-03-11	3202379	蔡启友	男	42Y	取除骨折内固定装置		其他	王振文	水小龙	何自力	股骨内固定物取出术
347	C04综合病房	2022-03-09	2022-03-12	3202422	李小芸	女	54Y	取除骨折内固定装置	高血压病;脂肪肝;肝钙化灶;特指肾盂积水	其他	杨雷	周一飞	张月雷	踝关节内固定物取出术
348	C04综合病房	2022-03-09	2022-03-12	3202428	虞汉娥	女	62Y	取除骨折内固定装置		其他	杨雷	周一飞	张月雷	锁骨内固定物取出术
349	C04综合病房	2022-03-10	2022-03-12	3202442	李燕	女	44Y	取除骨折内固定装置		其他	王振文	水小龙	何自力	胫骨内固定物取出术
350	C04综合病房	2022-03-03	2022-03-13	3202386	袁忠勇	男	51Y	创伤性小肠破裂	鼻骨骨折;脂肪肝;急性弥漫性腹膜炎;肠系膜裂伤;锁骨骨折;肋骨骨折	治愈	倪仲琳	黄和	潘传孟	剖腹探查术;腹腔冲洗检查;肠粘连松解术;肠系膜修补术;小肠破裂修补术
351	C04综合病房	2022-03-12	2022-03-14	3202570	倪松光	男	60Y	取除骨折内固定装置	后天性肾囊肿	其他	陈龙	陈龙	应晓洲	锁骨内固定物取出术
352	C04综合病房	2022-03-12	2022-03-14	3202571	何在勤	女	55Y	取除骨折内固定装置		其他	陈龙	陈龙	应晓洲	胫骨内固定物取出术
353	C04综合病房	2022-03-12	2022-03-14	3202608	蔡彩弟	女	43Y	取除骨折内固定装置	颈椎退行性病变;乙型肝炎小三阳;后天性肾囊肿	其他	徐晖	王胜	王胜	椎骨内固定物取出术
354	C04综合病房	2022-03-12	2022-03-15	3203031	夏纪梅	女	57Y	取除骨折内固定装置	肾结石	其他	陈龙	陈龙	应晓洲	跟骨内固定物取出术
355	C04综合病房	2022-03-14	2022-03-16	3203590	蒋欣涵	女	14Y	取除骨折内固定装置		其他	赵友明	赵友明	柯陈荣	锁骨内固定物取出术
356	C04综合病房	2022-03-05	2022-03-17	3203884	杨良弟	女	91Y	股骨粗隆间骨折	嵌顿性腹股沟斜疝;股疝;心房颤动	治愈	倪仲琳	黄和	潘传孟	单侧股疝无张力修补术;股骨骨折闭合复位髓内针内固定术;单侧腹股沟斜疝无张力修补术
357	C04综合病房	2022-03-15	2022-03-17	3203888	彭秀英	女	69Y	取除骨折内固定装置	脂肪肝	其他	杨雷	周一飞	张月雷	肱骨内固定物取出术
358	C04综合病房	2022-03-17	2022-03-19	3204470	郑录芳	女	47Y	取除骨折内固定装置		其他	杨雷	周一飞	张月雷	跖骨内固定物取出术
359	C04综合病房	2022-03-11	2022-03-21	3205089	陈桃青	男	61Y	创伤性回肠破裂	急性弥漫性腹膜炎;拇指挤压伤;拇指骨折;拇指神经损伤;腕和手水平拇指内在肌和肌腱损伤;腹股沟斜疝	治愈	倪仲琳	倪仲琳	潘传孟	腹腔镜检查;指神经缝合术;肌腱延迟缝合术;指骨骨折切开复位钢板内固定术;腹腔冲洗检查;回肠破裂修补术
360	C04综合病房	2022-03-15	2022-03-21	3205309	施贤芽	女	65Y	肠梗阻	乙型病毒性肝炎;肝炎后肝硬化;特指手术后状态;取除骨折内固定装置	治愈	倪仲琳	黄和	潘传孟
361	C04综合病房	2022-03-20	2022-03-21	3205311	江贝贝	男	28Y	取除骨折内固定装置	脂肪肝;胆囊息肉	其他	赵友明	赵友明	柯陈荣	踝关节内固定物取出术
362	C04综合病房	2022-03-19	2022-03-21	3205317	刘海丹	女	34Y	取除骨折内固定装置	脂肪肝	其他	陈龙	陈龙	应晓洲	胫骨内固定物取出术
363	C04综合病房	2022-03-19	2022-03-21	3205318	林柳芬	女	31Y	取除骨折内固定装置		其他	赵友明	赵友明	柯陈荣	锁骨内固定物取出术
364	C04综合病房	2022-03-20	2022-03-22	3205402	王心江	男	30Y	腹股沟斜疝	骨折治疗后恢复期	治愈	杨越涛	杨越涛	孟伟阳	单侧腹股沟疝无张力修补术
365	C04综合病房	2022-03-22	2022-03-24	3206514	林振光	男	57Y	取除骨折内固定装置	肾积水伴肾输尿管结石;脂肪肝	其他	陈龙	陈龙	应晓洲	胫骨内固定物取出术
366	C04综合病房	2022-03-22	2022-03-24	3206516	陈策	男	41Y	取除骨折内固定装置	肝血管瘤;胆囊腺肌症;肾结石	其他	陈龙	陈龙	应晓洲	胫骨内固定物取出术;肩胛骨内固定物取出术
367	C04综合病房	2022-03-21	2022-03-27	3207503	陈爱菊	女	67Y	肠梗阻	高血压病;2型糖尿病;脑梗死;子宫切除术后状态;骨折治疗后恢复期	治愈	王飞海	周磊	周磊
368	C04综合病房	2022-03-26	2022-03-28	3207832	叶芳芳	女	43Y	取除骨折内固定装置		其他	陈龙	陈龙	应晓洲	股骨内固定物取出术
369	C04综合病房	2022-03-26	2022-03-28	3207844	单秀兰	女	66Y	特指部位良性脂肪瘤样肿瘤	2型糖尿病;骨折治疗后恢复期;甲状腺恶性肿瘤个人史;血管瘤;高血压病	治愈	陈龙	陈龙	应晓洲	皮下组织病损切除术
370	C04综合病房	2022-03-27	2022-03-30	3208713	林何连	女	63Y	取除骨折内固定装置	脂肪肝;胆囊息肉;后天性肾囊肿;肝囊肿;高血压病	其他	赵友明	赵友明	柯陈荣	踝关节内固定物取出术
371	C04综合病房	2022-03-28	2022-03-30	3208757	周玉微	女	71Y	取除骨折内固定装置	糖尿病;特指主动脉瓣疾患;心功能不全;高血压病	其他	王振文	水小龙	何自力	股骨内固定物取出术
372	C04综合病房	2022-03-29	2022-03-31	3209011	张永福	男	72Y	取除骨折内固定装置	高血压病;心律失常;脂肪肝;前列腺增生;下肢动脉粥样硬化	其他	翁益民	翁益民	王特	踝关节内固定物取出术
373	C04综合病房	2022-03-29	2022-03-31	3209083	王成	男	27Y	取除骨折内固定装置		其他	余可和	余可和	卢晓郎	桡骨内固定物取出术
374	C04综合病房	2022-04-03	2022-04-05	3210774	李松燕	女	68Y	取除骨折内固定装置	胆囊息肉	其他	余可和	余可和	卢晓郎	髌骨内固定物取出术
375	C04综合病房	2022-04-07	2022-04-09	3211747	任翱翔	男	11Y	取除骨折内固定装置	后天性肾囊肿	其他	余可和	余可和	卢晓郎	胫骨内固定物取出术
376	C04综合病房	2022-04-09	2022-04-10	3212355	胡乐迪	男	41Y	取除骨折内固定装置		其他	陈龙	陈龙	应晓洲	胫骨内固定物取出术
377	C04综合病房	2022-04-09	2022-04-11	3212466	鲁彩华	女	40Y	腕和手水平拇指伸肌和肌腱损伤	指骨骨折	治愈	陈龙	陈龙	应晓洲	伸指肌腱缝合术;指骨骨折切开复位螺钉内固定术
378	C04综合病房	2022-03-09	2022-04-13	3213505	周全	男	31Y	骨盆骨折	肾衰竭;肝功能不全;脂肪肝;肺部感染;血气胸;开放性多发性损伤;特指治疗后恢复期;失血性休克;肺挫伤;胸骨骨折;肋骨骨折	好转	杨越涛	杨越涛	杨越涛	骨盆骨折闭合复位术;髂内动脉栓塞术;下肢动脉造影;脊椎骨折复位术
379	C04综合病房	2022-04-11	2022-04-13	3213541	项延雷	男	45Y	取除骨折内固定装置	脂肪肝;前列腺结石	其他	杨雷	周一飞	张月雷	尺骨内固定物取出术
380	C04综合病房	2022-04-13	2022-04-15	3213980	郭素芹	女	54Y	取除骨折内固定装置	高血压病;胆囊息肉	其他	余可和	余可和	卢晓郎	踝关节内固定物取出术
381	C04综合病房	2022-04-13	2022-04-15	3213981	潘成恩	男	53Y	取除骨折内固定装置	前列腺增生;脂肪肝	其他	余可和	余可和	卢晓郎	锁骨内固定物取出术
382	C04综合病房	2022-04-16	2022-04-17	3214980	陈雪琴	女	57Y	取除骨折内固定装置		其他	陈龙	陈龙	应晓洲	胫骨内固定物取出术
383	C04综合病房	2022-04-16	2022-04-18	3215355	周善有	男	35Y	取除骨折内固定装置	室性早搏;高血压病	其他	陈龙	陈龙	应晓洲	跟骨内固定物取出术
384	C04综合病房	2022-04-16	2022-04-18	3215357	黄晓勇	男	41Y	取除骨折内固定装置	脂肪肝	其他	陈龙	陈龙	应晓洲	胫骨内固定物取出术
385	C04综合病房	2022-04-17	2022-04-19	3215534	黄丽芳	女	46Y	取除骨折内固定装置	肾结石;胆囊结石;胆囊炎	其他	余可和	余可和	卢晓郎	踝关节外固定架去除术
386	C04综合病房	2022-04-19	2022-04-20	3216112	黄上生	男	66Y	取除骨折内固定装置	高血压病;后天性肾囊肿;2型糖尿病;脂肪肝;高脂血症	其他	陈龙	陈龙	应晓洲	肩锁关节内固定物取出术
387	C04综合病房	2022-04-17	2022-04-20	3216213	张献永	男	54Y	取除骨折内固定装置		其他	陈华	孙辽军	卢迪	胫骨内固定物取出术
388	C04综合病房	2022-04-19	2022-04-20	3216284	吴旭森	男	35Y	取除骨折内固定装置	后天性肾囊肿	其他	翁益民	翁益民	王特	掌骨内固定物取出术
389	C04综合病房	2022-04-19	2022-04-21	3216495	任天莹	女	12Y	第一掌骨骨折		治愈	翁益民	翁益民	王特	掌骨骨折切开复位钢针内固定术
390	C04综合病房	2022-04-19	2022-04-21	3216541	陈连松	男	54Y	取除骨折内固定装置	下肢动脉粥样硬化;后天性肾囊肿;脂肪肝	其他	陈龙	陈龙	应晓洲	股骨内固定物取出术
391	C04综合病房	2022-04-19	2022-04-21	3216592	张建东	男	49Y	取除骨折内固定装置	淋巴结增大;胆囊息肉;肝回声不均	其他	陈龙	陈龙	应晓洲	胫骨内固定物取出术
392	C04综合病房	2022-04-19	2022-04-23	3217136	陈继存	男	43Y	闭合性胫骨平台骨折	脂肪肝;胆囊息肉	治愈	陈龙	陈龙	应晓洲	胫骨骨折切开复位螺钉内固定术
393	C04综合病房	2022-04-23	2022-04-25	3217723	盛光球	男	53Y	髌骨骨折	脂肪肝	治愈	陈龙	陈龙	应晓洲	髌骨骨折切开复位螺钉内固定术
394	C04综合病房	2022-04-23	2022-04-25	3217944	王垒	男	28Y	取除骨折内固定装置	脂肪肝	其他	陈龙	陈龙	应晓洲	胫骨内固定物取出术
395	C04综合病房	2022-04-23	2022-04-25	3217962	陈仁卿	男	52Y	膝关节副韧带扭伤	骨折治疗后恢复期;多发性下肢浅表损伤;膝关节十字韧带扭伤;内侧半月板损伤;膝关节积液	好转	陈龙	陈龙	应晓洲	副韧带修补术
396	C04综合病房	2022-04-25	2022-04-27	3218730	王天平	男	48Y	取除骨折内固定装置	前列腺结石	其他	王振文	王振文	何自力	桡骨内固定物取出术
397	C04综合病房	2022-04-26	2022-04-28	3218878	陈奕桓	男	4Y	肱骨外髁骨折		治愈	陈龙	陈龙	应晓洲	肱骨骨折切开复位钢针内固定术
398	C04综合病房	2022-04-26	2022-04-28	3218901	骆立志	男	39Y	取除骨折内固定装置	后天性肾囊肿	其他	赵友明	赵友明	柯陈荣	胫骨内固定物取出术
399	C04综合病房	2022-04-27	2022-04-28	3219135	李则回	男	52Y	取除骨折内固定装置	高血压病;肾结石	其他	石成弟	石成弟	张儒	锁骨内固定物取出术
400	C04综合病房	2022-04-27	2022-04-29	3219367	郑蔓龄	女	62Y	取除骨折内固定装置	心功能不全;主动脉瓣关闭不全;二尖瓣返流;后天性肾囊肿;左房扩大	其他	余可和	余可和	卢晓郎	桡骨内固定物取出术
401	C04综合病房	2022-04-26	2022-04-29	3219368	卢庆明	女	53Y	取除骨折内固定装置		其他	翁益民	翁益民	王特	股骨内固定物取出术
402	C04综合病房	2022-04-26	2022-04-29	3219371	李阿花	女	48Y	取除骨折内固定装置		其他	翁益民	翁益民	王特	股骨内固定物取出术
403	C04综合病房	2022-04-27	2022-04-29	3219634	赵剑	男	34Y	取除骨折内固定装置	肝回声不均;肾钙化;肾结石	其他	余可和	余可和	卢晓郎	踝关节内固定物取出术
404	C04综合病房	2022-04-29	2022-05-02	3220384	张蕊恬	女	8Y	肱骨髁上骨折		治愈	陈龙	陈龙	应晓洲	肱骨骨折切开复位钢针内固定术
405	C04综合病房	2022-05-02	2022-05-04	3221162	周春加	男	51Y	取除骨折内固定装置	高血压病	其他	杨雷	杨雷	张月雷	胫骨内固定物取出术
406	C04综合病房	2022-05-03	2022-05-05	3221359	吴事炳	男	49Y	取除骨折内固定装置	肾结石	其他	陈龙	陈龙	应晓洲	胫骨内固定物取出术
407	C04综合病房	2022-05-03	2022-05-05	3221364	林玉妹	女	86Y	骨质疏松伴病理性骨折	高血压病;循环系统操作后疾患;2型糖尿病	好转	王振文	水小龙	何自力
408	C04综合病房	2022-05-04	2022-05-07	3222038	张憎	女	64Y	桡骨下端骨折	肺纤维化;肝囊肿	治愈	陈龙	陈龙	应晓洲	桡骨骨折切开复位螺钉内固定术
409	C04综合病房	2022-05-04	2022-05-07	3222061	钟兴贞	女	48Y	闭合性胫骨平台骨折	胆囊结石;脂肪肝;哮喘	治愈	陈龙	陈龙	应晓洲	胫骨骨折切开复位螺钉内固定术
410	C04综合病房	2022-05-04	2022-05-07	3222063	王海鸥	女	33Y	双踝骨折	副脾;胆囊息肉;乙型病毒性肝炎	治愈	陈龙	陈龙	应晓洲	踝关节骨折切开复位钢针内固定术
411	C04综合病房	2022-05-05	2022-05-07	3222086	张茗艺	女	9Y	鹰嘴骨折	桡骨颈骨折	治愈	陈龙	陈龙	应晓洲	桡骨骨折切开复位钢针内固定术
412	C04综合病房	2022-04-21	2022-05-08	3222209	郑龙海	男	64Y	创伤性脾破裂	多发性肋骨骨折;腹水;肺挫伤;头皮血肿;高血压病	治愈	王飞海	周磊	周磊	腹腔冲洗检查;脾切除术
413	C04综合病房	2022-05-07	2022-05-08	3222509	黎世星	男	27Y	取除骨折内固定装置		其他	陈龙	陈龙	应晓洲	尺骨内固定物取出术
414	C04综合病房	2022-05-07	2022-05-09	3222639	陈济伟	男	15Y	取除骨折内固定装置		其他	陈龙	陈龙	应晓洲	股骨内固定物取出术
415	C04综合病房	2022-05-07	2022-05-09	3222673	周林敏	男	22Y	取除骨折内固定装置		其他	陈龙	陈龙	应晓洲	锁骨内固定物取出术;股骨内固定物取出术
416	C04综合病房	2022-05-07	2022-05-09	3222684	陈锦平	男	59Y	取除骨折内固定装置	乙型病毒性肝炎	其他	陈龙	陈龙	应晓洲	踝关节内固定物取出术
417	C04综合病房	2022-05-07	2022-05-09	3222710	蔡国平	女	58Y	取除骨折内固定装置		其他	杨雷	杨雷	张月雷	踝关节内固定物取出术
418	C04综合病房	2022-05-10	2022-05-11	3223715	林琦轶	男	6Y	取除骨折内固定装置		其他	赵友明	赵友明	柯陈荣	尺骨内固定物取出术
419	C04综合病房	2022-05-09	2022-05-11	3223717	翁学士	男	36Y	取除骨折内固定装置		其他	水小龙	水小龙	何自力	踝关节内固定物取出术
420	C04综合病房	2022-05-09	2022-05-11	3223726	林婷婷	女	30Y	取除骨折内固定装置		其他	杨雷	杨雷	张月雷	胫骨内固定物取出术
421	C04综合病房	2022-05-11	2022-05-11	3223829	潘卓昊	男	15Y	取除骨折内固定装置		其他	余可和	余可和	卢晓郎	桡骨内固定物取出术
422	C04综合病房	2022-05-10	2022-05-12	3224035	黄建林	男	34Y	尺骨上端骨折	肱骨外髁骨折	治愈	陈龙	陈龙	应晓洲	尺骨骨折切开复位钢板内固定术
423	C04综合病房	2022-05-11	2022-05-12	3224081	王建凤	女	49Y	取除骨折内固定装置	胆囊息肉	其他	石成弟	石成弟	张儒	跖骨内固定物取出术
424	C04综合病房	2022-05-04	2022-05-14	3224680	陈书玲	女	45Y	动脉破裂	硬膜外血肿;多处挫伤;锁骨骨折;创伤性胸腔积液	治愈	吴伟军	吴伟军	叶孙志	肾动脉造影;腹腔动脉造影;腰动脉栓塞术
425	C04综合病房	2022-04-23	2022-05-15	3225086	尹汉林	男	46Y	创伤性脾破裂	脂肪肝;腹腔积血;失血性休克;皮肤挫伤;肺挫伤;股骨颈骨折;肝囊肿	治愈	杨越涛	杨越涛	姚志超	股骨骨折闭合复位钢针内固定术;脾切除术;腹腔冲洗检查;皮肤和皮下坏死组织切除清创术
426	C04综合病房	2022-05-14	2022-05-16	3225261	倪扬畅	男	5Y	肱骨髁上骨折		治愈	陈龙	陈龙	应晓洲	肱骨骨折切开复位钢板内固定术
427	C04综合病房	2022-05-14	2022-05-16	3225263	陈邦柳	男	60Y	取除骨折内固定装置		其他	陈龙	陈龙	应晓洲	跟骨内固定物取出术
428	C04综合病房	2022-05-02	2022-05-16	3225311	杨立钜	男	60Y	创伤性脾破裂	肝囊肿;脂肪肝;耻骨骨折;创伤性蛛网膜下腔出血;后天性肾囊肿;腹腔积血	治愈	杨越涛	王奕庚	姚志超	腹腔镜下脾切除术
429	C04综合病房	2022-05-14	2022-05-16	3225377	林苏弟	女	45Y	取除骨折内固定装置	肾结石;高血压病	其他	陈龙	陈龙	应晓洲	踝关节内固定物取出术
430	C04综合病房	2022-05-14	2022-05-16	3225383	谢敏	男	26Y	取除骨折内固定装置		其他	陈龙	陈龙	应晓洲	踝关节内固定物取出术
431	C04综合病房	2022-05-14	2022-05-16	3225517	厉欧海	男	50Y	拇趾骨折	高血压病;后天性肾囊肿;2型糖尿病;脂肪肝	好转	翁益民	翁益民	王特	趾骨骨折闭合复位钢针内固定术
432	C04综合病房	2022-05-16	2022-05-18	3226323	李传勇	男	37Y	取除骨折内固定装置		其他	赵友明	赵友明	柯陈荣	桡骨内固定物取出术
433	C04综合病房	2022-05-17	2022-05-19	3226513	王斌	男	27Y	取除骨折内固定装置	脂肪肝;后天性肾囊肿	其他	陈龙	陈龙	应晓洲	尺骨骨折切开复位钢板内固定术
434	C04综合病房	2022-05-09	2022-05-19	3226637	金建强	男	59Y	创伤性脾破裂	腹腔积血;高血压病;失血性休克;创伤性胸腔积液;多发性肋骨骨折;肺挫伤	治愈	吴伟军	吴伟军	叶孙志	腹腔镜下脾切除术;腹腔冲洗检查
435	C04综合病房	2022-05-18	2022-05-20	3226766	林阿花	女	45Y	取除骨折内固定装置		其他	水小龙	水小龙	何自力	胫骨内固定物取出术
436	C04综合病房	2022-05-18	2022-05-20	3226769	李雨晨	女	4Y	取除骨折内固定装置		其他	水小龙	水小龙	何自力	胫骨内固定物取出术
437	C04综合病房	2022-05-13	2022-05-20	3226817	刘春梅	女	79Y	急性阑尾炎	骨折治疗后恢复期;陈旧性骨盆骨折;骨质疏松;脂肪肝;贫血	好转	杨越涛	杨越涛	姚志超
438	C04综合病房	2022-04-26	2022-05-21	3227095	谢纯亲	男	49Y	脾损伤	多发性肋骨骨折;多发性胸椎骨折;多处挫伤;创伤性胸腔积液;前列腺钙化灶;颈椎间盘突出;腰和特指椎间盘疾患伴有脊髓病;创伤性气胸;耻骨骨折;腰椎骨折;颈椎关节强硬;肝钙化灶;肺挫伤;下肢静脉血栓形成	治愈	倪仲琳	黄和	潘传孟
439	C04综合病房	2022-05-08	2022-05-21	3227389	周龙顺	男	77Y	脾损伤	具有心脏起搏器;肋骨骨折;腹水;肺部感染;肺气肿	治愈	王飞海	周磊	周磊	脾切除术;腹腔冲洗检查
440	C04综合病房	2022-05-01	2022-05-22	3227646	麻兴艳	女	28Y	开放性肝破裂	肱骨内髁骨折;多发性肋骨骨折;腹水;肝功能不全;失血性休克;肾结石;液气胸;创伤性胸腔积液;肩胛骨骨折	治愈	倪仲琳	黄和	潘传孟	肝动脉栓塞术;肱骨骨折切开复位钢针内固定术;腹腔干、肝、脾动脉造影术;髂动脉栓塞术
441	C04综合病房	2022-05-21	2022-05-23	3228127	姚银莲	女	52Y	取除骨折内固定装置	胆囊结石;乙肝表面抗原携带者;后天性肾囊肿;肝囊肿;脂肪肝	其他	陈龙	陈龙	应晓洲	踝关节内固定物取出术
442	C04综合病房	2022-05-21	2022-05-23	3228128	陈柏连	男	38Y	取除骨折内固定装置	肾结石;高血压病;脂肪肝	其他	陈龙	陈龙	应晓洲	跟骨内固定物取出术
443	C04综合病房	2022-05-21	2022-05-23	3228130	陈春玉	女	54Y	取除骨折内固定装置	下肢动脉粥样硬化;脂肪肝	其他	杨雷	杨雷	张月雷	髌骨内固定物取出术
444	C04综合病房	2022-05-21	2022-05-23	3228132	孔令东	男	48Y	掌骨骨折	乙肝表面抗原携带者	治愈	陈龙	陈龙	应晓洲	掌骨骨折切开复位髓内针内固定术
445	C04综合病房	2022-05-21	2022-05-23	3228135	朱欢	女	25Y	取除骨折内固定装置	肝钙化灶	其他	杨雷	杨雷	张月雷	股骨内固定物取出术
446	C04综合病房	2022-05-21	2022-05-24	3228324	叶雪竹	女	68Y	桡骨骨折	高血压病;脊柱侧弯;肺结节;脂肪肝	好转	翁益民	翁益民	王特	桡骨骨折闭合复位钢针内固定术;外固定架固定
447	C04综合病房	2022-05-24	2022-05-26	3229124	黄彩珠	女	45Y	取除骨折内固定装置	肝硬化;脾大	其他	赵友明	赵友明	柯陈荣	锁骨内固定物取出术
448	C04综合病房	2022-05-24	2022-05-26	3229295	陈建国	男	58Y	取除骨折内固定装置	脂肪肝;胆囊结石	其他	翁益民	翁益民	王特	髌骨内固定物取出术
449	C04综合病房	2022-05-24	2022-05-26	3229296	吴丽萍	女	49Y	取除骨折内固定装置		其他	翁益民	翁益民	王特	胫骨内固定物取出术
450	C04综合病房	2022-05-25	2022-05-27	3229393	李秀品	女	76Y	桡骨下端骨折	下肢动脉粥样硬化;胆囊结石;主动脉瓣关闭不全;二尖瓣返流;后天性肾囊肿;肺钙化;肝钙化灶;肺大泡;心功能不全	治愈	余可和	余可和	卢晓郎	桡骨骨折切开复位螺钉内固定术
451	C04综合病房	2022-05-25	2022-05-27	3229480	卢忠榜	男	58Y	取除骨折内固定装置	下肢动脉粥样硬化;二尖瓣返流;高血压病;心功能不全;肝囊肿;脂肪肝;前列腺结石	其他	余可和	余可和	卢晓郎	股骨内固定物取出术
452	C04综合病房	2022-05-28	2022-05-30	3230609	朱琴琴	女	29Y	取除骨折内固定装置		其他	陈龙	陈龙	应晓洲	锁骨内固定物取出术
453	C04综合病房	2022-05-28	2022-05-30	3230614	应美玲	女	71Y	取除骨折内固定装置	胆囊结石;高血压病;2型糖尿病;膝关节僵硬	其他	陈龙	陈龙	应晓洲	胫骨内固定物取出术
454	C04综合病房	2022-05-28	2022-05-31	3231039	杨玉祥	男	66Y	取除骨折内固定装置		其他	赵友明	赵友明	柯陈荣	髌骨内固定物取出术
455	C04综合病房	2022-04-08	2022-06-02	3231844	陈文武	男	43Y	骨盆骨折	锁骨骨折;腰椎骨折;急性弥漫性腹膜炎;创伤性回肠破裂;多发性肋骨骨折;多发性面骨骨折;失血性休克	好转	倪仲琳	黄和	潘传孟	骨盆骨折闭合复位术;髂动脉栓塞术;髂动脉造影;回肠切除术;创面负压封闭引流[VSD];皮肤和皮下坏死组织切除清创术;桡骨骨折切开复位螺钉内固定术
456	C04综合病房	2022-06-04	2022-06-06	3233043	余严国	男	53Y	取除骨折内固定装置		其他	陈龙	陈龙	应晓洲	胫骨内固定物取出术
457	C04综合病房	2022-06-04	2022-06-06	3233044	项琴平	女	53Y	取除骨折内固定装置	肾结石;肝钙化灶	其他	陈龙	陈龙	应晓洲	踝关节内固定物取出术
458	C04综合病房	2022-06-04	2022-06-06	3233047	谢建平	男	46Y	取除骨折内固定装置	肾钙化	其他	陈龙	陈龙	应晓洲	肩锁关节内固定物取出术
459	C04综合病房	2022-06-04	2022-06-06	3233049	王玉海	男	24Y	取除骨折内固定装置		其他	陈龙	陈龙	应晓洲	踝关节内固定物取出术;胫骨内固定物取出术
460	C04综合病房	2022-06-04	2022-06-07	3233678	岳寿喜	男	90Y	腹股沟斜疝	脊柱压缩性骨折;完全性右束支传导阻滞;鞘膜积液;房室传导阻滞	治愈	杨越涛	杨越涛	杨越涛	单侧腹股沟疝无张力修补术;睾丸鞘膜积液切除术
461	C04综合病房	2022-06-06	2022-06-08	3234124	王世专	男	47Y	取除骨折内固定装置	高血压病;血吸虫性肝炎;胃溃疡	其他	水小龙	水小龙	何自力	掌骨内固定物取出术
462	C04综合病房	2022-06-06	2022-06-09	3234430	林正财	男	64Y	取除骨折内固定装置	后天性肾囊肿;肾积水伴肾结石;下肢动脉粥样硬化;前列腺结石;输尿管结石;下肢静脉曲张	其他	赵友明	赵友明	柯陈荣	锁骨内固定物取出术
463	C04综合病房	2022-06-07	2022-06-11	3235081	孙岳标	男	55Y	取除骨折内固定装置	脂肪肝	其他	陈龙	陈龙	应晓洲	跟骨内固定物取出术
464	C04综合病房	2022-06-11	2022-06-12	3235488	滕昊	男	22Y	取除骨折内固定装置	肾错构瘤;前列腺结石	其他	陈华	陈华	王特	指骨内固定物取出术
465	C04综合病房	2022-06-09	2022-06-12	3235522	林传槐	男	29Y	取除骨折内固定装置	脂肪肝	其他	杨雷	周一飞	张月雷	外固定装置去除
466	C04综合病房	2022-06-12	2022-06-14	3236382	戴方娟	女	79Y	胆囊结石伴慢性胆囊炎	骨折治疗后恢复期;后天性肾囊肿;多发性肝囊肿;脑梗死;高血压病;2型糖尿病;睡眠障碍;泌尿道感染;肺部感染;痴呆;高脂血症;子宫平滑肌瘤	治愈	倪仲琳	黄和	潘传孟
467	C04综合病房	2022-06-12	2022-06-15	3236762	项延熙	男	77Y	取除骨折内固定装置	下肢动脉粥样硬化;高血压病	其他	杨雷	周一飞	张月雷	髌骨内固定物取出术
468	C04综合病房	2022-06-14	2022-06-16	3236990	徐代杰	男	40Y	取除骨折内固定装置	脂肪肝	其他	陈龙	陈龙	应晓洲	尺骨内固定物取出术
469	C04综合病房	2022-06-14	2022-06-18	3237684	叶国铁	男	48Y	取除骨折内固定装置		其他	陈龙	陈龙	应晓洲	股骨内固定物取出术;胫骨内固定物取出术;髌骨内固定物取出术
470	C04综合病房	2022-06-01	2022-06-19	3238157	陈德金	男	53Y	创伤性脾破裂	肺挫伤;腰椎骨折;创伤性胸腔积液;腹腔积血;头皮血肿	治愈	吴伟军	吴伟军	邓应彬	腹腔冲洗检查;脾切除术
471	C04综合病房	2022-06-20	2022-06-22	3239236	余方毅	男	37Y	取除骨折内固定装置	特指手术后状态	其他	杨雷	周一飞	张月雷	锁骨内固定物取出术
472	C04综合病房	2022-06-21	2022-06-23	3239435	程柳红	男	31Y	取除骨折内固定装置		其他	陈龙	陈龙	应晓洲	跟骨内固定物取出术;胫骨内固定物取出术
473	C04综合病房	2022-06-21	2022-06-23	3239557	温作加	男	37Y	取除骨折内固定装置	肝硬化;肾错构瘤	其他	陈龙	陈龙	应晓洲	胫骨内固定物取出术
474	C04综合病房	2022-06-21	2022-06-23	3239608	夏芬芬	女	28Y	取除骨折内固定装置		其他	陈龙	陈龙	应晓洲	踝关节内固定物取出术
475	C04综合病房	2022-06-25	2022-06-27	3240851	徐黄菊	女	64Y	取除骨折内固定装置		其他	陈龙	陈龙	应晓洲	胫骨内固定物取出术
476	C04综合病房	2022-06-25	2022-06-27	3240862	谷玉芬	女	50Y	取除骨折内固定装置	后天性肾囊肿;脂肪肝	其他	陈龙	应晓洲	应晓洲	踝关节内固定物取出术
477	C04综合病房	2022-06-25	2022-06-27	3241012	陈庆棒	男	45Y	取除骨折内固定装置		其他	杨雷	周一飞	张月雷	肱骨内固定物取出术
478	C04综合病房	2022-06-28	2022-06-30	3242204	陈国洪	男	71Y	取除骨折内固定装置	2型糖尿病;脂肪肝;高血压病;原发性肺动脉高压;肝血管瘤;陈旧性多部位骨折;肾结石	其他	陈龙	陈龙	应晓洲	锁骨内固定物取出术
479	C04综合病房	2022-06-28	2022-06-30	3242207	丁莹	女	33Y	取除骨折内固定装置		其他	陈龙	陈龙	应晓洲	肱骨内固定物取出术
480	C04综合病房	2022-06-27	2022-06-30	3242309	胡丽华	女	38Y	取除骨折内固定装置		其他	杨雷	周一飞	张月雷	锁骨内固定物取出术
481	C04综合病房	2022-06-29	2022-07-01	3242411	姜少华	女	54Y	取除骨折内固定装置		其他	石成弟	胡炜	胡炜	肱骨内固定物取出术
482	C04综合病房	2022-07-02	2022-07-04	3243669	谢少英	女	38Y	取除骨折内固定装置	胆囊息肉	其他	陈龙	陈龙	应晓洲	胫骨内固定物取出术
483	C04综合病房	2022-07-02	2022-07-04	3243822	汪德夫	男	60Y	取除骨折内固定装置		其他	陈龙	陈龙	应晓洲	胫骨内固定物取出术;踝关节内固定物取出术
484	C04综合病房	2022-07-02	2022-07-04	3243868	李启兄	男	80Y	取除骨折内固定装置	原发性肺动脉高压;高血压病;特指手术后状态;后天性肾囊肿	其他	陈龙	陈龙	应晓洲	锁骨内固定物取出术
485	C04综合病房	2022-07-04	2022-07-06	3244757	杨舒琪	女	13Y	取除骨折内固定装置	脊柱侧弯	其他	杨雷	周一飞	项光恒	尺骨内固定物取出术
486	C04综合病房	2022-07-04	2022-07-06	3244772	邵智飞	男	14Y	取除骨折内固定装置		其他	陈华	孙辽军	王特	骨盆内固定物取出术
487	C04综合病房	2022-07-05	2022-07-07	3245177	周菊妹	女	66Y	取除骨折内固定装置		其他	陈龙	陈龙	应晓洲	胫骨内固定物取出术
488	C04综合病房	2022-07-05	2022-07-07	3245178	卢志	男	42Y	取除骨折内固定装置	胆囊息肉	其他	陈龙	陈龙	应晓洲	胫骨内固定物取出术
489	C04综合病房	2022-07-05	2022-07-07	3245180	陈大福	男	46Y	取除骨折内固定装置	肝囊肿;脂肪肝	其他	陈龙	陈龙	应晓洲	锁骨内固定物取出术
490	C04综合病房	2022-07-06	2022-07-08	3245420	黄红星	男	43Y	取除骨折内固定装置		其他	余可和	余可和	卢晓郎	锁骨内固定物取出术
491	C04综合病房	2022-07-05	2022-07-09	3245903	李未平	女	51Y	取除骨折内固定装置		其他	陈龙	陈龙	应晓洲	胫骨内固定物取出术
492	C04综合病房	2022-07-04	2022-07-09	3245912	温端勇	男	88Y	双侧腹股沟斜疝	前列腺增生;胆囊结石;陈旧性肋骨骨折;特指手术后状态	治愈	杨越涛	杨越涛	杨越涛	双侧腹股沟疝无张力修补术
493	C04综合病房	2022-07-09	2022-07-11	3246497	王洁灵	女	16Y	取除骨折内固定装置		其他	杨雷	杨雷	项光恒	踝关节内固定物取出术
494	C04综合病房	2022-07-09	2022-07-11	3246555	李忠福	女	65Y	取除骨折内固定装置	肾结石	其他	陈龙	陈龙	应晓洲	桡骨内固定物取出术
495	C04综合病房	2022-07-09	2022-07-11	3246562	林秀步	男	37Y	取除骨折内固定装置	肾结石	其他	陈龙	陈龙	应晓洲	胫骨内固定物取出术
496	C04综合病房	2022-07-09	2022-07-11	3246569	虞国良	男	42Y	取除骨折内固定装置		其他	陈龙	陈龙	应晓洲	锁骨内固定物取出术
497	C04综合病房	2022-07-09	2022-07-11	3246751	王誉锋	男	15Y	取除骨折内固定装置	完全性右束支传导阻滞	其他	赵友明	赵友明	柯陈荣	肱骨内固定物取出术
498	C04综合病房	2022-07-09	2022-07-12	3246499	叶茂浴	男	32Y	取除骨折内固定装置		其他	杨雷	周一飞	项光恒	踝关节内固定物取出术
499	C04综合病房	2022-07-09	2022-07-12	3247234	黄宗才	男	35Y	取除骨折内固定装置	肾结石;脂肪肝	其他	陈龙	陈龙	应晓洲	胫骨内固定物取出术
500	C04综合病房	2022-07-11	2022-07-13	3247485	陈彩莲	女	65Y	取除骨折内固定装置		其他	杨雷	周一飞	项光恒	锁骨内固定物取出术
501	C04综合病房	2022-07-11	2022-07-13	3247486	陈海洋	男	15Y	取除骨折内固定装置		其他	杨雷	周一飞	项光恒	桡骨内固定物取出术
502	C04综合病房	2022-07-11	2022-07-13	3247489	程慧琳	女	13Y	取除骨折内固定装置		其他	杨雷	周一飞	项光恒	骨盆内固定物取出术
503	C04综合病房	2022-07-11	2022-07-13	3247692	陈昊	男	16Y	取除骨折内固定装置		其他	陈华	孙辽军	王特	肱骨内固定物取出术
504	C04综合病房	2022-07-11	2022-07-14	3247929	谢宪琴	女	41Y	骨折治疗后恢复期	肾结石	其他	陈华	孙辽军	王特	髌骨内固定物取出术
505	C04综合病房	2022-07-12	2022-07-14	3247946	李小秋	女	44Y	取除骨折内固定装置	陈旧性膝韧带损伤;腰椎间盘突出	其他	陈龙	陈龙	应晓洲	胫骨内固定物取出术
506	C04综合病房	2022-07-12	2022-07-14	3248019	戴玲玲	女	53Y	取除骨折内固定装置	肾结石	其他	陈龙	应晓洲	应晓洲	踝关节内固定物取出术
507	C04综合病房	2022-07-13	2022-07-14	3248129	金睿航	男	12Y	取除骨折内固定装置		其他	石成弟	胡炜	胡炜	胫骨内固定物取出术
508	C04综合病房	2022-07-12	2022-07-14	3248131	叶增排	男	51Y	取除骨折内固定装置		其他	余可和	余可和	卢晓郎	胫骨内固定物取出术
509	C04综合病房	2022-07-13	2022-07-16	3248815	朱景崇	男	56Y	取除骨折内固定装置	2型糖尿病;高血压病	其他	水小龙	王振文	何自力	胫骨内固定物取出术
510	C04综合病房	2022-07-16	2022-07-17	3249251	黄崇兴	男	55Y	取除骨折内固定装置	尿毒症;高血压病;肝囊肿;肾病型肾炎;后天性肾囊肿	其他	陈龙	陈龙	应晓洲	踝关节内固定物取出术
511	C04综合病房	2022-07-16	2022-07-18	3249400	池方河	男	51Y	取除骨折内固定装置		其他	杨雷	周一飞	项光恒	锁骨内固定物取出术
512	C04综合病房	2022-07-16	2022-07-18	3249500	诸怡彤	女	16Y	取除骨折内固定装置		其他	杨雷	周一飞	项光恒	股骨内固定物取出术
513	C04综合病房	2022-07-16	2022-07-18	3249547	杨自力	男	16Y	取除骨折内固定装置		其他	陈龙	陈龙	应晓洲	跟骨内固定物取出术;胫骨内固定物取出术
514	C04综合病房	2022-07-16	2022-07-18	3249613	张尔凯	男	16Y	取除骨折内固定装置		其他	陈龙	陈龙	应晓洲	跟骨内固定物取出术
515	C04综合病房	2022-06-28	2022-07-18	3249708	施世光	男	26Y	创伤性脾破裂	肋骨骨折;特指趾骨骨折;肺挫伤;创伤性胸腔积液;腓骨骨折;内踝骨折	好转	倪仲琳	黄和	潘传孟	创面负压封闭引流[VSD];踝关节骨折切开复位钢板内固定术;踝关节融合术
516	C04综合病房	2022-07-18	2022-07-19	3250098	诸玲华	女	54Y	取除骨折内固定装置		其他	杨雷	周一飞	项光恒	髌骨内固定物取出术
517	C04综合病房	2022-07-18	2022-07-20	3250314	孙昱昊	男	16Y	取除骨折内固定装置		其他	杨雷	周一飞	项光恒	锁骨内固定物取出术
518	C04综合病房	2022-07-19	2022-07-20	3250567	李诚豪	男	24Y	取除骨折内固定装置	脂肪肝	其他	赵友明	赵友明	柯陈荣	踝关节内固定物取出术
519	C04综合病房	2022-07-19	2022-07-20	3250575	徐儒锋	男	13Y	取除骨折内固定装置	银屑病	其他	赵友明	赵友明	柯陈荣	胫骨内固定物取出术
520	C04综合病房	2022-07-19	2022-07-20	3250577	吴文慰	男	46Y	取除骨折内固定装置	肺结节;胆囊息肉;肝钙化灶	其他	陈龙	陈龙	应晓洲	跟骨内固定物取出术
521	C04综合病房	2022-07-20	2022-07-22	3251238	吴金应	男	38Y	取除骨折内固定装置	脂肪肝;二尖瓣返流;肺结节	其他	余可和	余可和	卢晓郎	胫骨内固定物取出术
522	C04综合病房	2022-07-23	2022-07-24	3252197	包明华	男	38Y	取除骨折内固定装置	胆囊息肉	其他	陈华	孙辽军	王特	掌骨内固定物取出术
523	C04综合病房	2022-06-30	2022-07-24	3252200	张巨翠	女	80Y	肺部感染	高血压病;胆囊切除术后状态;急性肾衰竭;特指电解质和液体平衡紊乱;下肢动脉粥样硬化;胸腔积液;恶心和呕吐;主动脉瓣硬化;腹水;肋骨骨折	好转	倪仲琳	黄和	潘传孟	腹腔穿刺术
524	C04综合病房	2022-07-23	2022-07-24	3252234	陈笑萍	女	61Y	取除骨折内固定装置	腰椎退行性病变;下肢静脉炎和血栓性静脉炎;肝囊肿;下肢动脉粥样硬化	其他	陈龙	陈龙	应晓洲	跖骨内固定物取出术
525	C04综合病房	2022-07-23	2022-07-25	3252462	黄文迁	男	23Y	取除骨折内固定装置		其他	王振文	水小龙	何自力	肱骨内固定物取出术
526	C04综合病房	2022-07-23	2022-07-25	3252467	倪秀钏	女	44Y	取除骨折内固定装置		其他	陈华	孙辽军	王特	胫骨内固定物取出术
527	C04综合病房	2022-07-23	2022-07-25	3252540	蒋王福	男	61Y	取除骨折内固定装置	脂肪肝;肝囊肿	其他	陈龙	陈龙	应晓洲	髌骨内固定物取出术
528	C04综合病房	2022-07-25	2022-07-26	3253028	朱月娥	女	55Y	取除骨折内固定装置	泌尿器官诊断性影像检查异常所见	其他	杨雷	周一飞	项光恒	尺骨内固定物取出术
529	C04综合病房	2022-07-25	2022-07-26	3253207	金鹏桂	男	16Y	取除骨折内固定装置	后天性肾囊肿	其他	陈华	孙辽军	王特	骨盆内固定物取出术
530	C04综合病房	2022-07-23	2022-07-27	3253620	安小波	男	28Y	取除骨折内固定装置	脂肪肝	其他	陈龙	陈龙	应晓洲	胫骨内固定物取出术;股骨内固定物取出术
531	C04综合病房	2022-07-26	2022-07-28	3253888	郑中孝	男	38Y	取除骨折内固定装置	后天性肾囊肿;肾结石;腰椎间盘突出;椎管狭窄	其他	陈龙	陈龙	应晓洲	桡骨内固定物取出术
532	C04综合病房	2022-07-26	2022-07-28	3253992	胡思岳	男	46Y	取除骨折内固定装置	脂肪肝;肝囊肿;后天性肾囊肿	其他	陈龙	陈龙	应晓洲	胫骨内固定物取出术
533	C04综合病房	2022-07-27	2022-07-28	3254015	谢炳银	男	18Y	取除骨折内固定装置		其他	王振文	水小龙	何自力	骨盆内固定物取出术
534	C04综合病房	2022-07-30	2022-07-31	3255123	虞连钗	女	56Y	取除骨折内固定装置	2型糖尿病;脂肪肝;胆囊结石;甲状腺机能亢进症	其他	杨雷	陈龙	应晓洲	胫骨内固定物取出术
535	C04综合病房	2022-07-30	2022-08-01	3255337	林其中	男	46Y	取除骨折内固定装置	脂肪肝	其他	陈龙	陈龙	应晓洲	跟骨内固定物取出术
536	C04综合病房	2022-07-16	2022-08-01	3255428	韩巧云	女	47Y	关闭结肠造口	手术后随诊检查;骨折治疗后恢复期	其他	吴伟军	吴伟军	吴伟军	结肠造口还纳术;肠粘连松解术
537	C04综合病房	2022-08-01	2022-08-03	3256485	陈如辉	男	14Y	取除骨折内固定装置		其他	杨雷	周一飞	项光恒	肱骨内固定物取出术
538	C04综合病房	2022-08-01	2022-08-03	3256516	黄乃顺	男	52Y	取除骨折内固定装置	肝囊肿;脂肪肝;前列腺结石	其他	王振文	水小龙	何自力	踝关节内固定物取出术
539	C04综合病房	2022-08-02	2022-08-04	3256753	周宇杰	男	16Y	取除骨折内固定装置		其他	陈龙	陈龙	应晓洲	踝关节内固定物取出术
540	C04综合病房	2022-08-03	2022-08-05	3257114	董淑婷	女	13Y	取除骨折内固定装置		其他	杨雷	周一飞	项光恒	肱骨内固定物取出术
541	C04综合病房	2022-08-02	2022-08-06	3257291	姜桂碎	男	41Y	取除骨折内固定装置	丙肝病毒携带者	其他	陈龙	陈龙	应晓洲	跟骨内固定物取出术;椎骨内固定修正术
542	C04综合病房	2022-08-06	2022-08-08	3258273	林秀菊	女	45Y	取除骨折内固定装置	脂肪肝	其他	陈龙	陈龙	应晓洲	肩胛骨内固定物取出术
543	C04综合病房	2022-08-06	2022-08-08	3258429	李洋	男	18Y	取除骨折内固定装置		其他	杨雷	周一飞	项光恒	锁骨内固定物取出术
544	C04综合病房	2022-07-29	2022-08-09	3258579	韩世炜	男	46Y	创伤性肝破裂	腹水;腰椎骨折	治愈	杨越涛	杨越涛	姚志超	腹腔冲洗检查;胆囊切除术;肝破裂修补术
545	C04综合病房	2022-08-08	2022-08-10	3259048	龚暄喆	男	14Y	取除骨折内固定装置		其他	赵友明	柯陈荣	柯陈荣	骨盆内固定物取出术
546	C04综合病房	2022-08-08	2022-08-10	3259083	刘金余	男	15Y	取除骨折内固定装置		其他	赵友明	柯陈荣	柯陈荣	桡骨内固定物取出术;尺骨内固定物取出术
547	C04综合病房	2022-08-08	2022-08-10	3259321	叶小兰	女	52Y	取除骨折内固定装置	胆囊息肉;肺结节	其他	赵友明	柯陈荣	柯陈荣	尺骨内固定物取出术
548	C04综合病房	2022-08-08	2022-08-10	3259339	陈赛西	女	46Y	取除骨折内固定装置		其他	王振文	水小龙	何自力	跟骨内固定物取出术
549	C04综合病房	2022-08-08	2022-08-10	3259342	黄李阳	男	13Y	取除骨折内固定装置		其他	王振文	水小龙	何自力	胫骨内固定物取出术
550	C04综合病房	2022-08-11	2022-08-13	3260344	杜良	男	20Y	取除骨折内固定装置		其他	陈龙	陈龙	应晓洲	肱骨内固定物取出术
551	C04综合病房	2022-08-13	2022-08-15	3261197	虞益平	男	57Y	取除骨折内固定装置	肝囊肿;高血压病;脂肪肝;胆囊息肉;后天性肾囊肿;前列腺结石	其他	陈龙	陈龙	应晓洲	锁骨内固定物取出术
552	C04综合病房	2022-08-14	2022-08-16	3261650	黄俊翔	男	15Y	取除骨折内固定装置		其他	余可和	余可和	卢晓郎	骨盆内固定物取出术
553	C04综合病房	2022-08-14	2022-08-16	3261651	苏鑫	男	10Y	取除骨折内固定装置		其他	余可和	余可和	卢晓郎	股骨内固定物取出术
554	C04综合病房	2022-08-15	2022-08-17	3262110	郭涛	男	13Y	取除骨折内固定装置	脂肪肝	其他	赵友明	柯陈荣	柯陈荣	桡骨内固定物取出术
555	C04综合病房	2022-08-18	2022-08-20	3263168	王淑娥	女	56Y	取除骨折内固定装置	肺部感染;肝囊肿;2型糖尿病	其他	余可和	余可和	卢晓郎	跖骨内固定物取出术;趾骨内固定物取出术
556	C04综合病房	2022-08-17	2022-08-20	3263232	李模庆	男	42Y	指骨骨折	脂肪肝;胆囊息肉;后天性肾囊肿;肾结石;前列腺结石	治愈	陈龙	陈龙	应晓洲	指骨骨折闭合复位钢针内固定术
557	C04综合病房	2022-08-20	2022-08-22	3263794	余东红	女	28Y	取除骨折内固定装置		其他	陈龙	陈龙	应晓洲	掌骨内固定物取出术
558	C04综合病房	2022-08-21	2022-08-23	3264372	余宸	男	15Y	取除骨折内固定装置		其他	余可和	余可和	卢晓郎	胫骨内固定物取出术
559	C04综合病房	2022-08-21	2022-08-23	3264411	张兴利	男	48Y	取除骨折内固定装置		其他	赵友明	赵友明	柯陈荣	腓骨内固定物取出术
560	C04综合病房	2022-08-23	2022-08-24	3264724	胡微芬	女	47Y	取除骨折内固定装置	特指原因未进行操作	其他	杨雷	周一飞	项光恒
561	C04综合病房	2022-08-22	2022-08-24	3264941	叶美云	女	50Y	取除骨折内固定装置		其他	赵友明	赵友明	柯陈荣	腓骨内固定物取出术
562	C04综合病房	2022-08-22	2022-08-24	3264944	张永盛	男	51Y	取除骨折内固定装置		其他	水小龙	水小龙	何自力	跟骨内固定物取出术;楔骨内固定物取出术
563	C04综合病房	2022-08-22	2022-08-24	3264947	鲍兰香	女	53Y	取除骨折内固定装置		其他	水小龙	水小龙	何自力	股骨内固定物取出术
564	C04综合病房	2022-08-22	2022-08-24	3264956	陈忠	男	22Y	取除骨折内固定装置		其他	赵友明	赵友明	柯陈荣	掌骨内固定物取出术
565	C04综合病房	2022-08-16	2022-08-28	3266353	吴石金	男	44Y	创伤性脾破裂	腹水;肋骨骨折;痛风	治愈	倪仲琳	黄和	潘传孟	腹腔冲洗检查;脾切除术
566	C04综合病房	2022-08-27	2022-08-29	3266604	潘秋影	女	53Y	取除骨折内固定装置	高血压病	其他	陈龙	陈龙	应晓洲	踝关节内固定物取出术
567	C04综合病房	2022-08-27	2022-08-29	3266613	张健康	男	45Y	取除骨折内固定装置		其他	陈龙	陈龙	应晓洲	肱骨内固定物取出术
568	C04综合病房	2022-08-28	2022-08-29	3266829	舒照军	男	52Y	取除骨折内固定装置	脂肪肝;胆囊息肉;高血压病;前列腺增生	其他	余可和	余可和	卢晓郎	桡骨内固定物取出术
569	C04综合病房	2022-08-28	2022-08-30	3267230	曹高益	男	37Y	取除骨折内固定装置	肝囊肿	其他	余可和	余可和	卢晓郎	跟骨内固定物取出术
570	C04综合病房	2022-08-29	2022-08-31	3267430	王鹏程	男	31Y	取除骨折内固定装置		其他	杨雷	周一飞	项光恒	肩锁关节脱位切开复位内固定术
571	C04综合病房	2022-08-30	2022-09-01	3267924	缪爱弟	女	60Y	取除骨折内固定装置		其他	王振文	水小龙	何自力	踝关节内固定物取出术
572	C04综合病房	2022-08-27	2022-09-01	3268066	李爱月	女	66Y	取除骨折内固定装置	皮肤慢性溃疡;特指手术后状态;肾发育不良	其他	陈龙	陈龙	应晓洲	皮肤和皮下坏死组织切除清创术;胫骨内固定物取出术
573	C04综合病房	2022-08-31	2022-09-02	3268291	胡微芬	女	47Y	取除骨折内固定装置		其他	杨雷	周一飞	周一飞	髌骨内固定物取出术
574	C04综合病房	2022-08-31	2022-09-02	3268297	刘尧友	男	74Y	取除骨折内固定装置	心房颤动;心脏扩大;高血压Ⅱ期	其他	杨雷	周一飞	周一飞	髌骨内固定物取出术
575	C04综合病房	2022-09-03	2022-09-04	3269219	张招弟	女	72Y	骨质疏松伴病理性骨折	特指手术后状态;后天性肾囊肿	治愈	陈龙	应晓洲	应晓洲
576	C04综合病房	2022-09-03	2022-09-05	3269420	赖江林	男	30Y	取除骨折内固定装置		其他	陈龙	应晓洲	应晓洲	锁骨内固定物取出术
577	C04综合病房	2022-08-03	2022-09-06	3269811	林钻响	男	43Y	腹部损伤	腹腔间隔室综合征;胸部损伤;多发性肋骨骨折;肺挫伤;特指手术后状态;胰瘘;肺部感染	治愈	杨越涛	杨越涛	杨越涛	腹部冲洗引流术;腹腔冲洗检查;创面负压封闭引流[VSD];剖腹探查术;肠粘连松解术
578	C04综合病房	2022-09-04	2022-09-06	3269938	林益腾	男	17Y	取除骨折内固定装置	肾结石	其他	余可和	余可和	卢晓郎	踝关节内固定物取出术
579	C04综合病房	2022-08-28	2022-09-06	3269940	陈兆恩	男	50Y	肝损伤	腹水;肋骨骨折;肝囊肿;乙型肝炎小三阳	治愈	倪仲琳	黄和	潘传孟	腹腔冲洗检查;肝修补术
580	C04综合病房	2022-09-05	2022-09-07	3270144	张庆洪	男	49Y	取除骨折内固定装置		其他	杨雷	周一飞	周一飞	踝关节内固定物取出术
581	C04综合病房	2022-09-05	2022-09-07	3270340	方道水	男	48Y	取除骨折内固定装置	前列腺结石;后天性肾囊肿;肝囊肿	其他	王振文	水小龙	218241	胫骨内固定物取出术
582	C04综合病房	2022-09-06	2022-09-08	3270699	谭春英	女	38Y	取除骨折内固定装置	骨折治疗后恢复期;脂肪肝	其他	陈龙	陈龙	应晓洲	桡骨内固定物取出术;尺骨内固定物取出术
583	C04综合病房	2022-09-10	2022-09-12	3272004	张晓虹	女	51Y	取除骨折内固定装置		其他	陈龙	陈龙	应晓洲	踝关节内固定物取出术
584	C04综合病房	2022-09-10	2022-09-12	3272166	叶飞龙	女	45Y	取除骨折内固定装置		其他	陈龙	陈龙	应晓洲	胫骨内固定物取出术
585	C04综合病房	2022-09-07	2022-09-14	3272812	林钻响	男	42Y	腹腔感染	多发性肋骨骨折;特指手术后状态;创伤性胃破裂;胰瘘;腹部损伤	治愈	杨越涛	姚志超	杨越涛
586	C04综合病房	2022-09-12	2022-09-14	3272968	王银财	男	60Y	取除骨折内固定装置		其他	杨雷	杨雷	周一飞	尺骨内固定物取出术
587	C04综合病房	2022-09-12	2022-09-14	3273004	陈琼诗	女	31Y	取除骨折内固定装置		其他	王振文	水小龙	218241	尺骨内固定物取出术
588	C04综合病房	2022-09-13	2022-09-15	3273306	陈永林	男	53Y	取除骨折内固定装置	前列腺增生;支气管扩张	其他	余可和	余可和	卢晓郎	髌骨内固定物取出术
589	C04综合病房	2022-09-14	2022-09-16	3273527	叶阿娥	女	53Y	取除骨折内固定装置	脂肪肝;高血压病;肺不典型增生;肝钙化灶	其他	余可和	余可和	卢晓郎	踝关节内固定物取出术
590	C04综合病房	2022-09-09	2022-09-18	3274254	陈永贤	男	75Y	腹股沟斜疝	颈动脉硬化;下肢动脉粥样硬化;骨折治疗后恢复期;锁骨下动脉粥样硬化;后循环缺血;高血压病	治愈	王飞海	周磊	周磊	单侧腹股沟斜疝无张力修补术
591	C04综合病房	2022-09-17	2022-09-19	3274552	陈传库	男	24Y	取除骨折内固定装置		其他	陈龙	应晓洲	应晓洲	肩锁关节内固定物取出术
592	C04综合病房	2022-09-17	2022-09-19	3274571	张忠东	男	50Y	取除骨折内固定装置	脂肪肝;后天性肾囊肿	其他	陈龙	应晓洲	应晓洲	锁骨内固定物取出术
593	C04综合病房	2022-09-17	2022-09-19	3274775	廖凤兰	女	70Y	取除骨折内固定装置	高血压病;肺恶性肿瘤个人史	其他	杨雷	杨雷	周一飞	肱骨内固定物取出术
594	C04综合病房	2022-09-19	2022-09-20	3275159	郭少荣	男	56Y	取除骨折内固定装置		其他	王振文	水小龙	218241	踝关节内固定物取出术
595	C04综合病房	2022-09-20	2022-09-22	3275752	李彬彬	女	45Y	取除骨折内固定装置		其他	陈龙	陈龙	应晓洲	跗骨内固定物取出术
596	C04综合病房	2022-09-21	2022-09-23	3276322	洪德胜	男	41Y	取除骨折内固定装置		其他	王振文	水小龙	218241	踝关节内固定物取出术
597	C04综合病房	2022-09-22	2022-09-24	3276464	王玉琴	女	68Y	取除骨折内固定装置		其他	陈龙	应晓洲	应晓洲	胫骨内固定物取出术
598	C04综合病房	2022-09-22	2022-09-24	3276471	张魁辉	男	42Y	取除骨折内固定装置	肾结石;脂肪肝;胆囊息肉	其他	陈龙	应晓洲	应晓洲	踝关节内固定物取出术
599	C04综合病房	2022-09-22	2022-09-24	3276496	程忠权	男	53Y	取除骨折内固定装置	脂肪肝	其他	余可和	余可和	卢晓郎	胫骨内固定物取出术
600	C04综合病房	2022-09-22	2022-09-24	3276497	陈光迪	男	67Y	取除骨折内固定装置	气管支气管炎;脂肪肝;后天性肾囊肿;肺大泡;主动脉钙化	其他	余可和	余可和	卢晓郎	胫骨内固定物取出术
601	C04综合病房	2022-09-22	2022-09-25	3276868	沈仁贵	男	54Y	取除骨折内固定装置	肾钙化;肾发育不良;脂肪肝;后天性肾囊肿;高血压病	其他	陈龙	应晓洲	应晓洲	肱骨内固定物取出术
602	C04综合病房	2022-09-25	2022-09-26	3277234	叶紫茹	女	3Y	取除骨折内固定装置		其他	赵友明	赵友明	柯陈荣	股骨内固定物取出术
603	C04综合病房	2022-09-28	2022-09-29	3278584	温桂香	女	56Y	取除骨折内固定装置	肝囊肿	其他	余可和	余可和	卢晓郎	桡骨内固定物取出术
604	C04综合病房	2022-09-28	2022-09-30	3279361	周洪妹	女	61Y	取除骨折内固定装置	2型糖尿病;脂肪肝;胆囊息肉;肾钙化;肾结石;盆腔囊肿;心功能不全	其他	余可和	余可和	卢晓郎	胫骨内固定物取出术
605	C04综合病房	2022-09-22	2022-10-01	3279625	周文武	男	52Y	腹部损伤	腹水;腰椎骨折;后天性肾囊肿;肺结节病;脂肪肝;腰椎间盘突出	治愈	吴伟军	邓应彬	吴伟军
606	C04综合病房	2022-09-22	2022-10-05	3280621	姚尚志	男	37Y	肠梗阻伴粘连	特指手术后状态;骨折治疗后恢复期;肋骨骨折;胸椎骨折;腰椎骨折;跖骨骨折;特指趾骨骨折	好转	吴伟军	吴伟军	吴伟军
607	C04综合病房	2022-10-08	2022-10-10	3281976	程正察	男	33Y	取除骨折内固定装置	脂肪肝	其他	陈龙	应晓洲	应晓洲	跟骨内固定物取出术
608	C04综合病房	2022-10-08	2022-10-10	3281978	施国林	男	43Y	取除骨折内固定装置		其他	陈龙	应晓洲	应晓洲	锁骨内固定物取出术
609	C04综合病房	2022-10-08	2022-10-10	3281982	叶志钏	男	43Y	取除骨折内固定装置	后天性肾囊肿;肝囊肿;脂肪肝	其他	陈龙	应晓洲	应晓洲	桡骨内固定物取出术
610	C04综合病房	2022-10-10	2022-10-12	3282952	徐婷	女	22Y	取除骨折内固定装置		其他	王振文	水小龙	218241	踝关节内固定物取出术
611	C04综合病房	2022-10-10	2022-10-12	3282955	张洪森	男	41Y	取除骨折内固定装置		其他	王振文	水小龙	218241	趾骨内固定物取出术
612	C04综合病房	2022-10-12	2022-10-13	3283335	江招本	男	48Y	取除骨折内固定装置	脂肪肝;肝血管瘤;胆囊息肉;高血压病;肾结石;前列腺结石	其他	余可和	余可和	卢晓郎	跟骨内固定物取出术
613	C04综合病房	2022-10-10	2022-10-14	3283472	熊利	男	38Y	取除骨折内固定装置	脂肪肝;后天性肾囊肿;肾结石	其他	翁益民	翁益民	项光恒	跖骨内固定物取出术;踝关节内固定物取出术
614	C04综合病房	2022-10-12	2022-10-14	3283544	彭素珍	女	64Y	取除骨折内固定装置	肝囊肿;骨质疏松	其他	王振文	水小龙	218241	胫骨内固定物取出术
615	C04综合病房	2022-10-12	2022-10-15	3283868	张云香	女	66Y	取除骨折内固定装置	肾错构瘤;肾结石	其他	陈华	陈华	蔡乐益	胫骨内固定物取出术
616	C04综合病房	2022-10-12	2022-10-15	3283871	应安静	男	46Y	取除骨折内固定装置	前列腺结石	其他	杨雷	周一飞	218371	胫骨内固定物取出术
617	C04综合病房	2022-10-12	2022-10-15	3283873	翁树杰	男	26Y	取除骨折内固定装置	脂肪肝	其他	杨雷	周一飞	218371	踝关节内固定物取出术
618	C04综合病房	2022-10-12	2022-10-15	3283876	焦海舟	男	44Y	跖骨骨折		治愈	陈龙	陈龙	应晓洲	跖骨内固定物取出术
619	C04综合病房	2022-10-15	2022-10-17	3284594	李秀良	男	53Y	取除骨折内固定装置	陈旧性肋骨骨折;脂肪肝	其他	陈龙	应晓洲	应晓洲	胫骨内固定物取出术
620	C04综合病房	2022-10-15	2022-10-17	3284679	戴鹤鸣	男	49Y	取除骨折内固定装置	脂肪肝	其他	杨雷	周一飞	218371	股骨内固定物取出术
621	C04综合病房	2022-10-15	2022-10-17	3284710	董希楚	男	41Y	取除骨折内固定装置	脂肪肝;肾结石	其他	杨雷	周一飞	218371	跟骨内固定物取出术
622	C04综合病房	2022-10-15	2022-10-17	3284755	麻连英	女	41Y	取除骨折内固定装置	脂肪肝	其他	陈龙	应晓洲	应晓洲	胫骨内固定物取出术
623	C04综合病房	2022-10-16	2022-10-18	3285305	夏林焕	男	48Y	取除骨折内固定装置	特指手术后状态;高血压病;脂肪肝;陈旧性肋骨骨折	其他	余可和	余可和	卢晓郎	锁骨内固定物取出术
624	C04综合病房	2022-10-16	2022-10-18	3285311	范锦心	男	66Y	取除骨折内固定装置	肺气肿;下肢动脉粥样硬化;脂肪肝;肝囊肿;后天性肾囊肿;前列腺增生;前列腺结石	其他	余可和	余可和	卢晓郎	肱骨内固定物取出术
625	C04综合病房	2022-09-27	2022-10-18	3285327	虞洪飞	男	59Y	腹部损伤	腹腔内出血;乳糜泻[腹腔病];胰瘘;头部外伤;多发性肋骨骨折;肺部感染;脂肪肝;肝囊肿;后天性肾囊肿;前列腺增生;十二指肠损伤;胃损伤;眶骨骨折	治愈	吴伟军	吴伟军	吴伟军	剖腹探查术;胰腺修补术;胃破裂修补术
626	C04综合病房	2022-10-17	2022-10-19	3285699	胡先琪	男	58Y	取除骨折内固定装置	多发性肋骨骨折;下肢静脉曲张	其他	杨雷	周一飞	218371	股骨内固定物取出术
627	C04综合病房	2022-10-18	2022-10-20	3285934	叶昊天	男	24Y	取除骨折内固定装置		其他	陈龙	陈龙	应晓洲	尺骨内固定物取出术
628	C04综合病房	2022-10-18	2022-10-20	3285998	邹伟	男	27Y	取除骨折内固定装置	乙型肝炎大三阳;特指肾盂积水;肝功能不全;肝钙化灶	其他	陈龙	陈龙	应晓洲	胫骨内固定物取出术
629	C04综合病房	2022-10-18	2022-10-20	3286110	陈兴海	男	44Y	取除骨折内固定装置	后天性膝以上大腿缺失	其他	王振文	水小龙	218241	踝关节内固定物取出术
630	C04综合病房	2022-10-22	2022-10-24	3287637	唐明芳	男	42Y	取除骨折内固定装置	前列腺囊肿	其他	杨雷	周一飞	218371	胫骨内固定物取出术
631	C04综合病房	2022-10-22	2022-10-24	3287669	王加林	男	41Y	取除骨折内固定装置	高血压病;2型糖尿病;肾结石	其他	陈龙	应晓洲	应晓洲	胫骨内固定物取出术
632	C04综合病房	2022-10-22	2022-10-24	3287830	薛立波	男	43Y	取除骨折内固定装置	肾错构瘤;2型糖尿病;脂肪肝	其他	陈龙	应晓洲	应晓洲	胫骨内固定物取出术
633	C04综合病房	2022-10-23	2022-10-24	3287883	胡冰鸥	男	28Y	取除骨折内固定装置		其他	余可和	余可和	卢晓郎	锁骨内固定物取出术
634	C04综合病房	2022-10-18	2022-10-25	3288165	胡爱华	女	51Y	取除骨折内固定装置	肝囊肿;脂肪肝;肝钙化灶;脓毒血症	其他	陈龙	应晓洲	应晓洲	跟骨内固定物取出术
635	C04综合病房	2022-10-23	2022-10-25	3288238	邹建波	男	29Y	骨折不连接	取除骨折内固定装置;胆囊息肉	治愈	余可和	余可和	卢晓郎	跖骨内固定物取出术
636	C04综合病房	2022-10-24	2022-10-26	3288541	王琴花	女	43Y	取除骨折内固定装置		其他	赵友明	赵友明	胡炜	桡骨内固定物取出术
637	C04综合病房	2022-10-24	2022-10-26	3288551	刘双红	女	33Y	取除骨折内固定装置	肾结石;肝回声不均	其他	杨雷	周一飞	218371	锁骨内固定物取出术
638	C04综合病房	2022-10-24	2022-10-26	3288655	黄晓荣	男	47Y	取除骨折内固定装置	后天性趾缺失;胆囊结石;后天性肾囊肿	其他	王振文	水小龙	218241	跖骨内固定物取出术
639	C04综合病房	2022-10-18	2022-10-26	3288693	郑建武	男	44Y	肾挫伤	肋骨骨折;肝功能不全;急性丙型病毒性肝炎;脂肪肝	治愈	杨越涛	杨越涛	杨越涛	肾动脉栓塞术;肾动脉造影
640	C04综合病房	2022-10-25	2022-10-27	3288877	王丽玲	女	67Y	取除骨折内固定装置	肝囊肿;脂肪肝;高血压病;后天性肾囊肿	其他	陈龙	应晓洲	应晓洲	踝关节内固定物取出术
641	C04综合病房	2022-10-25	2022-10-27	3288941	李玉香	女	80Y	取除骨折内固定装置	脂肪肝;肝囊肿;高血压病	其他	杨雷	周一飞	218371	外固定装置去除
642	C04综合病房	2022-10-25	2022-10-28	3289269	黄相棉	女	60Y	取除骨折内固定装置	肾结石;胆囊息肉;后天性肾囊肿	其他	余可和	余可和	卢晓郎	跖骨内固定物取出术
643	C04综合病房	2022-10-26	2022-10-28	3289278	朱小军	男	48Y	取除骨折内固定装置	肺结节;脂肪肝;肝囊肿;胆囊息肉	其他	余可和	余可和	卢晓郎	跖骨内固定物取出术
644	C04综合病房	2022-10-07	2022-10-29	3289619	周送法	男	80Y	前列腺增生	双侧腹股沟直疝;脑卒中后遗症;脊柱压缩性骨折;前列腺炎性疾病;膀胱结石	治愈	杨越涛	杨越涛	杨越涛	经尿道前列腺气化电切术[TEVAP手术];单侧腹股沟疝修补术;经尿道膀胱镜膀胱超声碎石术
645	C04综合病房	2022-10-29	2022-10-31	3290458	李爱玉	女	64Y	鹰嘴骨折	心律失常;二尖瓣返流;胆囊结石	治愈	陈龙	应晓洲	应晓洲	尺骨骨折切开复位钢针内固定术
646	C04综合病房	2022-10-29	2022-10-31	3290495	陈细女	女	49Y	取除骨折内固定装置	脂肪肝	其他	陈龙	应晓洲	应晓洲	锁骨内固定物取出术
647	C04综合病房	2022-10-31	2022-11-02	3291341	刘霞	女	52Y	取除骨折内固定装置	胆囊息肉;胆囊结石	其他	杨雷	周一飞	218371	肱骨内固定物取出术
648	C04综合病房	2022-10-31	2022-11-02	3291343	苏德春	女	56Y	取除骨折内固定装置		其他	杨雷	周一飞	218371	肱骨内固定物取出术
649	C04综合病房	2022-11-01	2022-11-03	3291642	邱小琴	女	53Y	取除骨折内固定装置	2型糖尿病	其他	王振文	水小龙	218241	桡骨内固定物取出术
650	C04综合病房	2022-11-02	2022-11-04	3291813	蔡修叨	男	53Y	取除骨折内固定装置	后天性肾囊肿;前列腺增生;前列腺结石	其他	王振文	水小龙	218241	胫骨内固定物取出术
651	C04综合病房	2022-11-05	2022-11-07	3292954	林爱国	男	56Y	取除骨折内固定装置	脂肪肝;肝囊肿;肾结石	其他	陈龙	陈龙	应晓洲	桡骨内固定物取出术
652	C04综合病房	2022-11-05	2022-11-07	3293073	谭云	男	44Y	取除骨折内固定装置		其他	陈龙	陈龙	应晓洲	锁骨内固定物取出术
653	C04综合病房	2022-11-05	2022-11-07	3293115	董兴华	男	32Y	取除骨折内固定装置	脂肪肝	其他	陈龙	陈龙	应晓洲	胫骨内固定物取出术
654	C04综合病房	2022-10-20	2022-11-08	3293583	郑贵祥	男	46Y	肠系膜裂伤	失血性休克;腰椎骨折;腹腔内出血	治愈	倪仲琳	黄和	潘传孟	肠系膜修补术;剖腹探查术;腹腔冲洗检查;小肠部分切除术
655	C04综合病房	2022-11-06	2022-11-08	3293584	王应清	男	55Y	取除骨折内固定装置	脂肪肝;后天性肾囊肿	其他	余可和	余可和	卢晓郎	髌骨内固定物取出术
656	C04综合病房	2022-11-07	2022-11-09	3293988	洪涛	男	51Y	取除骨折内固定装置	糖尿病	其他	杨雷	周一飞	218371	胫骨内固定物取出术
657	C04综合病房	2022-11-07	2022-11-09	3293997	项利造	男	38Y	取除骨折内固定装置	前列腺结石	其他	王振文	水小龙	218241	踝关节内固定物取出术
658	C04综合病房	2022-11-07	2022-11-09	3294000	朱发操	男	57Y	取除骨折内固定装置	胆囊息肉;肝囊肿	其他	王振文	水小龙	218241	胫骨内固定物取出术
659	C04综合病房	2022-11-05	2022-11-10	3294401	赵章文	男	63Y	骨折内固定物植入感染	取除骨折内固定装置;脂肪肝;后天性肾囊肿;高血压病	治愈	陈龙	应晓洲	应晓洲	皮肤和皮下坏死组织切除清创术;踝关节内固定物取出术
660	C04综合病房	2022-11-07	2022-11-10	3294429	陈亨清	男	74Y	取除骨折内固定装置	下肢动脉粥样硬化	其他	赵友明	柯陈荣	柯陈荣	髌骨内固定物取出术
661	C04综合病房	2022-11-08	2022-11-10	3294441	杨乾顺	男	46Y	取除骨折内固定装置	肝钙化灶	其他	王振文	水小龙	218241	踝关节内固定物取出术
662	C04综合病房	2022-10-21	2022-11-11	3294574	陈芊含	女	15Y	创伤性脾破裂	颈椎间盘创伤性破裂;多处挫伤;耻骨骨折;骶骨骨折;多发性胸椎骨折;多发性肋骨骨折;创伤性气胸;肺挫伤	好转	杨越涛	姚志超	218362
663	C04综合病房	2022-11-10	2022-11-12	3295075	赵晓彬	男	45Y	取除骨折内固定装置	皮肤挫伤;肺结节	其他	余可和	余可和	卢晓郎	跟骨内固定物取出术
664	C04综合病房	2022-11-10	2022-11-12	3295080	季云飞	女	61Y	取除骨折内固定装置	高血压病;2型糖尿病;脂肪肝;肺大泡;后天性肾囊肿;下肢动脉粥样硬化	其他	余可和	余可和	卢晓郎	踝关节内固定物取出术
665	C04综合病房	2022-11-10	2022-11-12	3295082	陆志光	男	58Y	取除骨折内固定装置	胆囊息肉;肝回声不均	其他	余可和	余可和	卢晓郎	锁骨内固定物取出术
666	C04综合病房	2022-10-28	2022-11-13	3295354	李一新	男	36Y	开放性腹部损伤	腹水;肺挫伤;多发性肋骨骨折;胸腔积液;腰椎骨折;肝损伤;脾损伤;肾上腺出血	治愈	吴伟军	邓应彬	邓应彬	脾动脉栓塞术;肝动脉栓塞术;腹腔干、肝、脾动脉造影术
667	C04综合病房	2022-11-12	2022-11-13	3295545	潘敬冲	男	47Y	取除骨折内固定装置		其他	陈龙	应晓洲	应晓洲	腓骨内固定物取出术
668	C04综合病房	2022-11-12	2022-11-14	3295769	张秀	女	50Y	指骨骨折	肝钙化灶	治愈	陈龙	应晓洲	应晓洲	指骨骨折切开复位钢板内固定术
669	C04综合病房	2022-11-12	2022-11-14	3295854	张崇良	男	55Y	取除骨折内固定装置	高血压病;脑卒中后遗症;肝病;胆囊息肉;副脾;肺结节	其他	陈龙	应晓洲	应晓洲	踝关节内固定物取出术
670	C04综合病房	2022-11-12	2022-11-14	3295925	马银钗	女	53Y	取除骨折内固定装置	后天性肾囊肿;肾结石;肝回声不均	其他	陈龙	应晓洲	应晓洲	肩胛骨内固定物取出术
671	C04综合病房	2022-11-14	2022-11-16	3296699	李法书	男	52Y	取除骨折内固定装置	特指含硅[矽]粉尘肺尘埃沉着病;脂肪肝;前列腺增生;前列腺结石;后天性肾囊肿	其他	杨雷	杨雷	218371	胫骨内固定物取出术
672	C04综合病房	2022-11-14	2022-11-16	3296754	董文设	男	63Y	取除骨折内固定装置	胆囊息肉;肾结石;前列腺增生;前列腺结石;下肢动脉粥样硬化	其他	杨雷	周一飞	218371	胫骨内固定物取出术
673	C04综合病房	2022-11-15	2022-11-16	3296836	程淞	男	43Y	取除骨折内固定装置	骨折治疗后恢复期;肝钙化灶;肾结石	其他	余可和	余可和	卢晓郎	胫骨内固定物取出术
674	C04综合病房	2022-11-15	2022-11-17	3296942	陈火秀	女	45Y	取除骨折内固定装置	脂肪肝;肝钙化灶	其他	陈龙	应晓洲	应晓洲	桡骨内固定物取出术
675	C04综合病房	2022-11-15	2022-11-17	3296967	周静	女	7Y	肱骨髁上骨折		治愈	陈龙	应晓洲	应晓洲	肱骨骨折闭合复位螺钉内固定术
676	C04综合病房	2022-11-15	2022-11-17	3296973	陈卓凡	男	22Y	取除骨折内固定装置		其他	陈龙	应晓洲	应晓洲	锁骨内固定物取出术
677	C04综合病房	2022-11-15	2022-11-17	3297003	陈启德	男	33Y	取除骨折内固定装置		其他	余可和	余可和	卢晓郎	胫骨内固定物取出术
678	C04综合病房	2022-11-03	2022-11-17	3297004	黄永军	男	28Y	肝损伤	开放性多发性损伤;骨盆骨折;颅骨骨折;手舟状骨骨折;多处挫伤;上颌骨骨折	治愈	杨越涛	杨越涛	218362
679	C04综合病房	2022-11-15	2022-11-17	3297176	郑京来	男	56Y	取除骨折内固定装置	高血压病;下肢动脉粥样硬化;肺纤维化	其他	余可和	余可和	卢晓郎	胫骨内固定物取出术
680	C04综合病房	2022-11-17	2022-11-18	3297268	李华玉	男	32Y	取除骨折内固定装置		其他	陈龙	陈龙	应晓洲	踝关节内固定物取出术
681	C04综合病房	2022-11-17	2022-11-19	3297610	林翔	男	16Y	桡骨下端骨折		治愈	陈龙	陈龙	应晓洲	桡骨骨折切开复位钢板内固定术
682	C04综合病房	2022-11-17	2022-11-19	3297618	张茗艺	女	10Y	取除骨折内固定装置		其他	陈龙	陈龙	应晓洲	尺骨内固定物取出术;桡骨内固定物取出术
683	C04综合病房	2022-11-20	2022-11-20	3298221	刘洪蓉	女	71Y	骨质疏松伴病理性骨折	特指手术后状态	治愈	汤骏	汤骏	吴剑彬
684	C04综合病房	2022-11-19	2022-11-21	3298528	黄月凤	女	48Y	指骨骨折	高血压病;肝血管瘤;肺钙化	治愈	陈龙	应晓洲	应晓洲	指骨骨折闭合复位钢针内固定术
685	C04综合病房	2022-11-19	2022-11-21	3298542	张爱菊	女	51Y	取除骨折内固定装置		其他	陈龙	应晓洲	应晓洲	腓骨内固定物取出术
686	C04综合病房	2022-11-21	2022-11-23	3299351	周云平	男	38Y	取除骨折内固定装置	脂肪肝	其他	杨雷	周一飞	218371	跟骨内固定物取出术
687	C04综合病房	2022-11-21	2022-11-23	3299361	姜晓丹	女	43Y	取除骨折内固定装置	脂肪肝	其他	杨雷	周一飞	218371	髌骨内固定物取出术
688	C04综合病房	2022-11-21	2022-11-23	3299471	卢梅子	女	42Y	取除骨折内固定装置	肝回声不均	其他	王振文	水小龙	218241	肱骨内固定物取出术
689	C04综合病房	2022-11-22	2022-11-23	3299475	胡理燕	女	36Y	取除骨折内固定装置	脂肪肝;肝钙化灶;肾钙化	其他	余可和	余可和	卢晓郎	踝关节内固定物取出术
690	C04综合病房	2022-11-16	2022-11-23	3299548	王建文	男	50Y	脾损伤	腰椎退行性病变;腰椎间盘突出;脂肪肝;胆囊息肉;肺挫伤;胸腔积液;肋骨骨折;头皮血肿;髂骨骨折;腰椎骨折	治愈	倪仲琳	黄和	潘传孟
691	C04综合病房	2022-11-22	2022-11-25	3300076	伍素文	女	82Y	取除骨折内固定装置	肝囊肿;胆总管扩张;后天性肾囊肿;膝关节病;高血压病;肝回声不均	其他	翁益民	翁益民	项光恒	踝关节内固定物取出术
692	C04综合病房	2022-11-24	2022-11-26	3300460	林丽芬	女	31Y	取除骨折内固定装置		其他	陈龙	应晓洲	应晓洲	锁骨内固定物取出术
693	C04综合病房	2022-11-17	2022-11-26	3300471	周水莲	女	28Y	创伤性脾破裂	锁骨骨折;肺挫伤;胫腓骨下端骨折;髂骨骨折;开放性多发性损伤;脾损伤;肝损伤;腹腔积血;气胸;多发性肋骨骨折	治愈	吴伟军	吴伟军	姚志超	腹腔冲洗检查;腹腔镜下脾切除术
694	C04综合病房	2022-11-26	2022-11-28	3301074	何在勤	女	56Y	取除骨折内固定装置		其他	陈龙	应晓洲	应晓洲	踝关节内固定物取出术;肱骨内固定物取出术
695	C04综合病房	2022-11-24	2022-11-28	3301403	徐阿碎	女	73Y	桡骨下端骨折	尺骨茎突骨折;脂肪肝;肝囊肿;肾结石	治愈	陈龙	应晓洲	应晓洲	桡骨骨折切开复位钢板内固定术
696	C04综合病房	2022-11-28	2022-11-30	3301904	朱植晓	男	28Y	取除骨折内固定装置		其他	杨雷	周一飞	218371	骨盆内固定物取出术
697	C04综合病房	2022-11-30	2022-12-01	3302567	林源	男	37Y	取除骨折内固定装置	脂肪肝	其他	余可和	余可和	卢晓郎	踝关节内固定物取出术
698	C04综合病房	2022-11-30	2022-12-03	3302817	王敦林	男	45Y	取除骨折内固定装置	前列腺结石	其他	陈华	孙辽军	蔡乐益	胫骨内固定物取出术
699	C04综合病房	2022-11-29	2022-12-03	3302823	宋广华	男	51Y	桡骨下端骨折	肋骨骨折;胸腔积液	治愈	陈龙	应晓洲	应晓洲	桡骨骨折切开复位钢板内固定术
700	C04综合病房	2022-11-30	2022-12-03	3302955	叶张芬	女	52Y	取除骨折内固定装置	脂肪肝	其他	杨雷	周一飞	218371	股骨内固定物取出术
701	C04综合病房	2022-12-01	2022-12-04	3303585	黄珊珊	女	20Y	取除骨折内固定装置	皮肤和皮下组织局部感染;肾结石	其他	陈龙	应晓洲	应晓洲	皮肤和皮下坏死组织切除清创术;踝关节内固定物取出术
702	C04综合病房	2022-11-24	2022-12-04	3303594	邓作春	男	36Y	不完全性肠梗阻	脊髓损伤;创伤性截瘫;神经源性膀胱;神经源性肠;特指椎间盘移位;腰椎骨折;膈疝;多发性肋骨骨折;肘关节脱位;前臂尺神经损伤;脂肪肝;肾结石;肝内胆管结石;胆囊息肉;慢性胃炎	好转	倪仲琳	黄和	潘传孟
703	C04综合病房	2022-12-03	2022-12-05	3303834	傅士加	男	49Y	取除骨折内固定装置	脂肪肝;肝囊肿	其他	陈龙	应晓洲	应晓洲	跟骨内固定物取出术
704	C04综合病房	2022-12-03	2022-12-05	3303843	尹超央	女	61Y	取除骨折内固定装置	后天性肾囊肿;肝钙化灶;错构瘤病;肾结石	其他	陈龙	应晓洲	应晓洲	踝关节内固定物取出术
705	C04综合病房	2022-12-03	2022-12-05	3303884	潘林花	女	63Y	取除骨折内固定装置	肝囊肿;脂肪肝	其他	杨雷	周一飞	218371	胫骨内固定物取出术
706	C04综合病房	2022-12-03	2022-12-05	3303934	夏春菊	女	60Y	取除骨折内固定装置	脂肪肝;肝囊肿;胆囊息肉;后天性肾囊肿;特指手术后状态;慢性胃炎;高血压病;甲状腺囊肿;锁骨下动脉盗血综合征	其他	陈龙	应晓洲	应晓洲	肱骨内固定物取出术
707	C04综合病房	2022-12-03	2022-12-05	3303937	郑立	男	31Y	取除骨折内固定装置	脂肪肝	其他	杨雷	周一飞	218371	尺骨内固定物取出术
708	C04综合病房	2022-12-03	2022-12-05	3304018	洪象位	男	49Y	取除骨折内固定装置		其他	洪建军	余洋	郑亦静	胫骨内固定物取出术
709	C04综合病房	2022-12-05	2022-12-06	3304459	陈中鹏	男	48Y	取除骨折内固定装置	脂肪肝;胆囊息肉;后天性肾囊肿	其他	黄俊武	王鉴顺	218239	踝关节内固定物取出术
710	C04综合病房	2022-12-05	2022-12-07	3304923	戴晓西	男	61Y	取除骨折内固定装置	后天性肾囊肿;肾结石;前列腺结石	其他	赵友明	余贤斌	柯陈荣	掌骨内固定物取出术
711	C04综合病房	2022-12-06	2022-12-08	3305080	张剑英	男	41Y	取除骨折内固定装置	高血压病;脂肪肝;肝钙化灶;胆囊结石;胆囊息肉;后天性肾囊肿	其他	陈龙	应晓洲	应晓洲	锁骨内固定物取出术
712	C04综合病房	2022-11-26	2022-12-08	3305215	陈丁	男	38Y	肠系膜出血	肠扭转;腹腔积血;眼睑裂伤;眶骨骨折;面部软组织挫伤	治愈	王飞海	周磊	218360	眼睑缝合术;腹腔冲洗检查;肠系膜修补术
713	C04综合病房	2022-12-06	2022-12-10	3305716	诸葛邦东	男	49Y	取除骨折内固定装置	脂肪肝;后天性肾囊肿;前列腺增生	其他	翁益民	翁益民	项光恒	髌骨内固定物取出术
714	C04综合病房	2022-12-06	2022-12-10	3305731	白姿蓉	女	29Y	取除骨折内固定装置		其他	翁益民	翁益民	项光恒	肱骨内固定物取出术
715	C04综合病房	2022-12-06	2022-12-10	3305734	潘秋华	女	69Y	取除骨折内固定装置	跖骨骨折;人工膝关节;脂肪肝;肾结石	其他	翁益民	翁益民	项光恒	踝关节内固定物取出术
716	C04综合病房	2022-12-08	2022-12-10	3305893	蔡自刚	男	53Y	取除骨折内固定装置	多发性肝囊肿	其他	杨雷	周一飞	218371	桡骨内固定物取出术
717	C04综合病房	2022-12-10	2022-12-11	3306340	刘斐玉	女	78Y	取除骨折内固定装置	骨折治疗后恢复期	其他	陈龙	应晓洲	应晓洲	肱骨内固定物取出术
718	C04综合病房	2022-12-10	2022-12-12	3306455	陈锡华	男	65Y	取除骨折内固定装置	后天性肾囊肿;肾结石	其他	陈龙	应晓洲	应晓洲	踝关节内固定物取出术
719	C04综合病房	2022-12-10	2022-12-12	3306456	颜伟	男	48Y	取除骨折内固定装置	后天性肾囊肿;特指腹部区域诊断性影像检查异常所见	其他	陈龙	陈龙	应晓洲	胫骨内固定物取出术
720	C04综合病房	2022-12-10	2022-12-12	3306457	高美雪	女	55Y	取除骨折内固定装置	胆囊结石	其他	陈龙	应晓洲	应晓洲	胫骨内固定物取出术
721	C04综合病房	2022-12-10	2022-12-12	3306464	黄作远	男	48Y	取除骨折内固定装置	肝囊肿;胆囊息肉;前列腺结石;肺气肿;肺结节	其他	洪建军	余洋	郑亦静	胫骨内固定物取出术
722	C04综合病房	2022-12-12	2022-12-13	3307213	潘小芬	女	54Y	取除骨折内固定装置		其他	黄俊武	王鉴顺	218239	瘢痕松解术;桡骨内固定物取出术
723	C04综合病房	2022-12-13	2022-12-14	3307668	丁力芝	男	29Y	取除骨折内固定装置		其他	陈龙	应晓洲	应晓洲	踝关节内固定物取出术
724	C04综合病房	2022-12-12	2022-12-14	3307670	徐鑫	男	76Y	取除骨折内固定装置	脂肪肝;胆囊结石;后天性肾囊肿;下肢静脉曲张;肺部阴影	其他	陈龙	应晓洲	应晓洲	踝关节内固定物取出术
725	C04综合病房	2022-12-13	2022-12-15	3307788	陈美玲	女	59Y	取除骨折内固定装置	脂肪肝;胆囊结石;2型糖尿病	其他	陈龙	应晓洲	应晓洲	髌骨内固定物取出术
726	C04综合病房	2022-12-13	2022-12-15	3307789	张小秋	女	63Y	桡骨下端骨折	尺骨茎突骨折;特指主动脉瓣疾患;二尖瓣关闭不全;主动脉钙化	治愈	陈龙	应晓洲	应晓洲	桡骨骨折切开复位钢板内固定术
727	C04综合病房	2022-12-13	2022-12-15	3307790	董君田	男	54Y	取除骨折内固定装置	脂肪肝	其他	陈龙	应晓洲	应晓洲	踝关节内固定物取出术
728	C04综合病房	2022-12-14	2022-12-16	3308130	谢惠芬	女	51Y	取除骨折内固定装置	脂肪肝;肾错构瘤	其他	余可和	卢迪	卢迪	踝关节内固定物取出术
729	C04综合病房	2022-12-14	2022-12-16	3308131	王爱国	女	61Y	取除骨折内固定装置	肾结石;后天性肾囊肿;肝囊肿;直肠恶性肿瘤;输尿管结石	其他	洪建军	余洋	郑亦静	胫骨内固定物取出术
730	C04综合病房	2022-12-14	2022-12-16	3308132	王金凤	女	40Y	取除骨折内固定装置	肺部感染;肺大泡	其他	余可和	卢迪	卢迪	踝关节内固定物取出术
731	C04综合病房	2022-12-15	2022-12-17	3308336	杨松妹	女	77Y	取除骨折内固定装置	主动脉钙化;脂肪肝;胆囊结石;左房扩大;特指主动脉瓣疾患;高血压病;2型糖尿病	其他	陈龙	陈龙	应晓洲	尺骨内固定物取出术
732	C04综合病房	2022-12-15	2022-12-17	3308354	杨海萍	女	38Y	取除骨折内固定装置	脂肪肝	其他	余可和	卢迪	卢迪	踝关节内固定物取出术
733	C04综合病房	2022-12-15	2022-12-17	3308390	雷小青	女	35Y	取除骨折内固定装置	肺特指疾患	其他	余可和	余可和	卢迪	跖骨内固定物取出术;跟骨内固定物取出术
734	C04综合病房	2022-11-12	2022-12-17	3308499	潘忠勉	男	69Y	创伤性脾破裂	肋骨骨折;肺挫伤;失血性休克;腹腔积血	治愈	杨越涛	王奕庚	218362	腹腔镜下脾切除术;腹腔冲洗检查
735	C04综合病房	2022-12-13	2022-12-17	3308630	李培众	男	82Y	胆囊结石伴慢性胆囊炎	肾结石;骨折治疗后随诊检查	治愈	杨越涛	王奕庚	218362	腹腔镜下胆囊切除术
736	C04综合病房	2022-12-08	2022-12-17	3308654	张洁	男	32Y	肝损伤	肋骨骨折;创伤性气胸	好转	吴伟军	邓应彬	姚志超
737	C04综合病房	2022-12-17	2022-12-19	3309240	蔡爱珠	女	56Y	取除骨折内固定装置	脂肪肝;后天性肾囊肿	其他	陈龙	陈龙	应晓洲	锁骨内固定物取出术
738	C04综合病房	2022-12-18	2022-12-20	3309655	庄子睿	男	4Y	取除骨折内固定装置	肘关节僵硬	其他	余可和	余可和	卢迪	肘关节松解术;肱骨内固定物取出术
739	C04综合病房	2022-12-17	2022-12-20	3309657	周贻查	男	28Y	取除骨折内固定装置	慢性乙型病毒性肝炎;脂肪肝;肾积水伴输尿管结石	其他	余可和	卢迪	卢迪	髌骨内固定物取出术
740	C04综合病房	2022-12-19	2022-12-21	3310101	林爱花	女	56Y	取除骨折内固定装置	人工膝关节;脂肪肝;胆囊胆固醇沉着症	其他	杨雷	周一飞	218371	股骨内固定物取出术
741	C04综合病房	2022-12-19	2022-12-21	3310102	肖钰松	女	56Y	取除骨折内固定装置	脂肪肝	其他	杨雷	周一飞	218371	踝关节内固定物取出术
742	C04综合病房	2022-12-19	2022-12-21	3310103	陈福弟	男	57Y	取除骨折内固定装置		其他	王振文	水小龙	218241	锁骨内固定物取出术
743	C04综合病房	2022-12-19	2022-12-21	3310104	陈忠尧	男	55Y	取除骨折内固定装置	胆囊息肉;肾结石;前列腺结石	其他	王振文	水小龙	218241	踝关节内固定物取出术
744	C04综合病房	2022-12-19	2022-12-21	3310248	夏丽芬	女	45Y	取除骨折内固定装置	抑郁症	其他	杨雷	周一飞	218371	骨盆内固定物取出术
745	C04综合病房	2022-12-20	2022-12-22	3310644	李变化	男	39Y	取除骨折内固定装置	高血压病	其他	陈龙	陈龙	应晓洲	跖骨内固定物取出术
746	C04综合病房	2022-12-22	2022-12-24	3311005	陈光桃	男	38Y	取除骨折内固定装置		其他	王振文	王振文	218241	跟骨内固定物取出术
747	C04综合病房	2022-12-24	2022-12-26	3311944	陈明女	女	16Y	取除骨折内固定装置		其他	陈龙	应晓洲	应晓洲	股骨内固定物取出术
748	C04综合病房	2022-12-24	2022-12-26	3311945	李秋峰	男	28Y	取除骨折内固定装置		其他	陈龙	应晓洲	应晓洲	腓骨内固定物取出术
749	C04综合病房	2022-12-26	2022-12-28	3312736	鲍苏朴	男	65Y	取除骨折内固定装置	下肢动脉粥样硬化;后天性肾囊肿;前列腺增生;前列腺结石	其他	杨雷	周一飞	218371	髌骨内固定物取出术
750	C04综合病房	2022-12-26	2022-12-28	3312739	张碎开	男	52Y	取除外固定装置	骨折治疗后恢复期;脊椎病	其他	杨雷	周一飞	218371	骨盆外固定架去除术
751	C04综合病房	2022-12-26	2022-12-28	3312740	胡永土	男	64Y	取除骨折内固定装置	脂肪肝;肝囊肿;胆囊息肉;后天性肾囊肿;肾钙化;前列腺增生;肾结石;前列腺结石	其他	杨雷	周一飞	218371	髌骨内固定物取出术
752	C04综合病房	2022-12-26	2022-12-28	3312746	朱建军	男	44Y	取除骨折内固定装置	后天性肾囊肿	其他	王振文	水小龙	218241	跟骨内固定物取出术
753	C04综合病房	2022-12-27	2022-12-28	3313133	金晓月	女	45Y	取除骨折内固定装置		其他	陈龙	应晓洲	应晓洲	锁骨内固定物取出术
754	C04综合病房	2022-12-27	2022-12-28	3313138	冯胜魁	男	54Y	取除骨折内固定装置	脂肪肝;肝囊肿;后天性肾囊肿;前列腺结石;肾结石	其他	陈龙	陈龙	应晓洲	跟骨内固定物取出术
755	C04综合病房	2022-12-27	2022-12-29	3313172	洪汝孝	男	39Y	取除骨折内固定装置	脂肪肝	其他	陈龙	应晓洲	应晓洲	腓骨内固定物取出术;胫骨内固定物取出术
756	C04综合病房	2022-12-28	2022-12-30	3313669	陈光民	男	27Y	取除骨折内固定装置		其他	王振文	水小龙	218241	尺骨内固定物取出术
757	C04综合病房	2022-12-29	2022-12-31	3313934	姚德兵	男	32Y	取除骨折内固定装置	脂肪肝;高血压病;肾结石	其他	陈龙	应晓洲	应晓洲	踝关节内固定物取出术
758	C04综合病房	2022-12-29	2022-12-31	3313935	陈小玲	女	31Y	取除骨折内固定装置	胆囊结石;肝回声不均;胆囊胆固醇沉着症;肾结石	其他	杨雷	周一飞	218371	尺骨内固定物取出术
759	C05疼痛科	2025-12-18	2022-01-02	3178237	周国香	女	84Y	骨质疏松	高血压病;心房颤动;肺部感染;腰椎骨折	好转	占恭豪	占恭豪	黄茜茜
760	C05疼痛科	2022-01-02	2022-01-09	3180789	林春香	女	83Y	脑梗死	高血压病;骨质疏松伴病理性骨折	未愈	许峰	许峰	何伶俐
761	C05疼痛科	2022-01-03	2022-01-15	3182627	许中连	男	72Y	腰肌劳损	大手术个人史;高尿酸血症;骨折治疗后恢复期	好转	占恭豪	占恭豪	田心毅
762	C05疼痛科	2022-01-05	2022-01-15	3182674	林永钗	女	89Y	急性冠脉综合征	急性心肌梗死;心力衰竭;呼吸衰竭;肺部感染;骨质疏松伴病理性骨折;耻骨骨折;2型糖尿病;心房颤动;下肢静脉血栓形成;人工髋关节;高血压病	未愈	占恭豪	占恭豪	田心毅
763	C05疼痛科	2022-01-11	2022-01-18	3183692	周玉花	女	87Y	骨质疏松伴病理性骨折	高血压病;腰椎椎管狭窄	好转	占恭豪	占恭豪	田心毅
764	C05疼痛科	2022-01-08	2022-01-22	3184866	朱玉兰	女	77Y	腰椎间盘突出	骨质疏松伴病理性骨折;高血压病;循环系统操作后疾患;冠状动脉粥样硬化性心脏病;脊柱侧弯	治愈	许峰	许峰	黄茜茜
765	C05疼痛科	2022-01-18	2022-01-22	3185169	刘丽珍	女	72Y	骨质疏松	脊柱骨折	好转	占恭豪	占恭豪	田心毅
766	C05疼痛科	2022-01-22	2022-01-29	3187431	陈秀凤	女	74Y	骨质疏松	脊柱骨折;高血压病;营养性巨幼细胞性贫血	好转	占恭豪	占恭豪	田心毅
767	C05疼痛科	2022-01-18	2022-02-01	3188551	徐芝兰	男	80Y	腰椎间盘突出	膝关节炎;骨质疏松;前列腺增生;腰椎骨折	好转	占恭豪	占恭豪	田心毅
768	C05疼痛科	2022-01-29	2022-02-06	3190406	温菊媛	女	85Y	骨质疏松	脊柱骨折;下肢静脉血栓形成	好转	占恭豪	占恭豪	田心毅
769	C05疼痛科	2022-01-29	2022-02-12	3193148	李娒弟	女	81Y	骨质疏松伴病理性骨折	脊柱骨折;高血压病	好转	占恭豪	占恭豪	田心毅
770	C05疼痛科	2022-02-22	2022-02-26	3196727	卢香莲	女	76Y	骨质疏松伴病理性骨折	脊柱骨折;高血压病;2型糖尿病;骨折治疗后恢复期	治愈	占恭豪	占恭豪	田心毅
771	C05疼痛科	2022-02-22	2022-02-27	3197131	林莲英	女	71Y	骨质疏松伴病理性骨折		好转	占恭豪	王佩芳	田心毅
772	C05疼痛科	2022-02-22	2022-02-28	3197532	童裕林	男	83Y	骨质疏松伴病理性骨折	脊柱骨折	好转	占恭豪	王佩芳	田心毅
773	C05疼痛科	2022-02-27	2022-03-12	3202447	周素芳	女	66Y	腰椎间盘突出	腰椎骨折;肺恶性肿瘤个人史	治愈	许峰	许峰	何伶俐	椎间盘射频消融术;椎管扩大成形术（经椎间孔镜）;神经根管松解术;腰椎间盘髓核切除术
774	C05疼痛科	2022-03-05	2022-03-12	3202330	陈松兰	女	70Y	神经痛	骨质疏松;骶骨骨折;膝关节炎;高血压病;特指手术后状态;胆囊切除术后状态	好转	占恭豪	王佩芳	田心毅	周围神经破坏术
775	C05疼痛科	2022-02-27	2022-03-13	3202408	郑爱珠	女	79Y	腰椎间盘突出	骨质疏松;脊柱骨折;高血压病	好转	占恭豪	王佩芳	田心毅
776	C05疼痛科	2022-03-05	2022-03-15	3202977	周国雄	男	74Y	骨质疏松伴病理性骨折	脊柱骨折;腰肌劳损	好转	占恭豪	王佩芳	田心毅	胸椎间盘造影;连续硬膜外阻滞术
777	C05疼痛科	2022-03-12	2022-03-19	3204382	李岳林	男	73Y	颈椎关节强硬	腰椎椎管狭窄;胸椎骨折;高血压病;痛风性关节炎;肾衰竭;重度贫血;结肠肿瘤	好转	占恭豪	王佩芳	田心毅
778	C05疼痛科	2022-03-06	2022-03-21	3205080	薛盛信	男	79Y	骨质疏松伴病理性骨折	小腿浅表损伤;神经痛;脑梗死后遗症;高血压病;大手术个人史	好转	许峰	许峰	黄茜茜
779	C05疼痛科	2022-03-14	2022-03-22	3205453	胡玉凤	女	81Y	骨质疏松伴病理性骨折	腰椎间盘突出;高血压病	好转	占恭豪	王佩芳	田心毅
780	C05疼痛科	2022-03-13	2022-03-22	3205616	叶岩金	男	69Y	食管恶性肿瘤	高血压病;骨折治疗后恢复期;陈旧性肋骨骨折;恶性肿瘤的维持性化疗;恶性肿瘤术后放射治疗	好转	陈文俊	陈文俊	林瑞芳
781	C05疼痛科	2022-03-23	2022-03-30	3208438	朱松弟	女	82Y	骨质疏松伴病理性骨折		好转	许峰	许峰	何伶俐
782	C05疼痛科	2022-03-27	2022-04-03	3209825	吴正普	男	74Y	神经痛	腰椎椎管狭窄;高血压病;特指T细胞淋巴瘤;2型糖尿病;大脑动脉栓塞脑梗死;骨质疏松伴病理性骨折	好转	许峰	许峰	黄茜茜
783	C05疼痛科	2022-04-04	2022-04-08	3211517	陈月华	女	65Y	肺恶性肿瘤	骨折治疗后恢复期;骨继发恶性肿瘤	好转	吴剑	吴剑	吴聪聪
784	C05疼痛科	2022-03-24	2022-04-09	3211700	叶岩金	男	69Y	肺部感染	高血压病;恶性肿瘤术后放射治疗;化疗后骨髓抑制;食管恶性肿瘤;恶性肿瘤的维持性化疗;肋骨骨折;特指手术后状态	好转	陈文俊	朱宝玲	朱宝玲
785	C05疼痛科	2022-03-27	2022-04-09	3211926	翁连英	女	83Y	骨质疏松伴病理性骨折	高血压病	好转	许峰	许峰	黄茜茜
786	C05疼痛科	2022-03-02	2022-04-09	3211952	王秀英	女	81Y	腰椎椎管狭窄	肺恶性肿瘤;幽门螺旋杆菌感染;高血压病;骨质疏松伴病理性骨折;2型糖尿病;脂肪肝;反流性食管炎;高脂血症;胃良性肿瘤	好转	许峰	许峰	黄茜茜	椎管扩大成形术（经椎间孔镜）;腰椎间盘髓核切除术;神经根管松解术;椎间盘射频消融术
787	C05疼痛科	2022-04-02	2022-04-12	3212808	周松花	女	67Y	骨质疏松伴病理性骨折	颈椎关节强硬;慢性胃炎	好转	占恭豪	占恭豪	何伶俐
788	C05疼痛科	2022-03-26	2022-04-12	3212929	方才娇	女	68Y	闭合性胫骨平台骨折	高血压病;骨质疏松;2型糖尿病	治愈	占恭豪	占恭豪	何伶俐
789	C05疼痛科	2022-03-29	2022-04-12	3213037	林周香	女	78Y	骨质疏松伴病理性骨折	高血压病;冠状动脉粥样硬化;循环系统操作后疾患	好转	占恭豪	占恭豪	何伶俐
790	C05疼痛科	2022-04-09	2022-04-16	3214189	叶文文	女	75Y	骨质疏松伴病理性骨折	高脂血症;脊柱骨折	治愈	占恭豪	占恭豪	何伶俐
791	C05疼痛科	2022-04-09	2022-04-16	3214384	朱玉兰	女	77Y	骨质疏松伴病理性骨折	腰椎间盘突出;高血压病;冠状动脉支架植入后状态;冠状动脉粥样硬化性心脏病	好转	许峰	王佩芳	黄茜茜
792	C05疼痛科	2022-03-30	2022-04-17	3214675	严金林	男	79Y	腰椎椎管狭窄	骨质疏松伴病理性骨折;膝关节病;肾积水伴肾输尿管结石	好转	许峰	王佩芳	黄茜茜	腰椎间盘髓核切除术;神经根管松解术;椎间盘射频消融术;椎管扩大成形术（经椎间孔镜）
793	C05疼痛科	2022-04-16	2022-04-19	3215632	杨宝香	女	81Y	骨质疏松伴病理性骨折	高血压病;2型糖尿病	好转	占恭豪	占恭豪	何伶俐
794	C05疼痛科	2022-04-17	2022-04-20	3215914	李丽英	女	55Y	骨质疏松伴病理性骨折		好转	许峰	王佩芳	黄茜茜
795	C05疼痛科	2022-04-08	2022-04-23	3216808	张秋莲	女	64Y	腰椎椎管狭窄	骨质疏松伴病理性骨折	好转	许峰	王佩芳	黄茜茜	周围神经破坏术
796	C05疼痛科	2022-04-20	2022-04-24	3217462	郑绸花	女	72Y	骨质疏松伴病理性骨折		好转	许峰	王佩芳	黄茜茜
797	C05疼痛科	2022-04-20	2022-04-24	3217469	胡春爱	女	83Y	骨质疏松伴病理性骨折		好转	许峰	王佩芳	黄茜茜
798	C05疼痛科	2022-04-23	2022-04-28	3219141	叶岩金	男	69Y	恶性肿瘤的维持性化疗	白细胞疾患;恶性肿瘤的维持性化疗;食管恶性肿瘤;陈旧性肋骨骨折;高血压病;特指手术后状态;化疗后骨髓抑制	好转	陈文俊	陈文俊	林瑞芳
799	C05疼痛科	2022-04-19	2022-05-03	3220568	高碎弟	女	85Y	骨质疏松伴病理性骨折	痴呆;高血压病;多关节病;特指手术后状态	好转	占恭豪	占恭豪	何伶俐
800	C05疼痛科	2022-04-25	2022-05-04	3220927	陈美香	女	82Y	腰椎间盘突出	骨质疏松伴病理性骨折;类风湿性关节炎	治愈	许峰	王佩芳	黄茜茜	腰椎间盘髓核切除术;神经根管松解术;椎间盘射频消融术;椎管扩大成形术（经椎间孔镜）
801	C05疼痛科	2022-05-02	2022-05-04	3220929	孙冬兰	女	76Y	骨质疏松伴病理性骨折	脊柱压缩性骨折;腰椎间盘突出;高血压病;人工髋关节;多关节炎	好转	占恭豪	占恭豪	田心毅
802	C05疼痛科	2022-05-03	2022-05-09	3222842	苏彩媚	女	60Y	腰肌劳损	特指手术后状态;食管静脉瘤;结肠息肉;糜烂性胃炎;高脂血症;高血压病;骨质疏松伴病理性骨折	好转	占恭豪	占恭豪	田心毅
803	C05疼痛科	2022-05-02	2022-05-10	3223291	叶岩金	男	69Y	急性上呼吸道感染	高血压病;白细胞异常;化疗后骨髓抑制;特指手术后状态;陈旧性肋骨骨折;食管恶性肿瘤	好转	陈文俊	朱宝玲	朱宝玲
804	C05疼痛科	2022-05-04	2022-05-11	3223635	金来春	男	84Y	骨质疏松伴病理性骨折	高血压病;支气管炎	好转	许峰	许峰	王佩芳
805	C05疼痛科	2022-04-28	2022-05-15	3224854	陈成竹	女	87Y	腰椎椎管狭窄	高血压病;膝关节炎;骨质疏松伴病理性骨折;慢性根尖周炎	好转	许峰	王佩芳	黄茜茜
806	C05疼痛科	2022-05-07	2022-05-16	3225409	谢丐花	女	70Y	骨质疏松伴病理性骨折	腰椎椎管狭窄;腰椎骨折;高血压病	治愈	许峰	许峰	王佩芳	脊髓神经束切断术
807	C05疼痛科	2022-05-10	2022-05-18	3226100	陈顺英	女	78Y	骨质疏松伴病理性骨折	脊柱压缩性骨折;腰椎间盘突出;高血压病;膝关节病;特指手术后状态;颈椎关节强硬	治愈	占恭豪	占恭豪	田心毅	周围神经破坏术;脊神经根射频消融术
808	C05疼痛科	2022-05-03	2022-05-21	3226956	陈永寿	男	87Y	腰椎间盘突出	脊椎前移;前列腺增生;骨质疏松;脑梗死个人史;后天性肾囊肿;高血压病;脊柱压缩性骨折	好转	占恭豪	占恭豪	田心毅	连续硬膜外阻滞术;腰椎间盘髓核切除术;神经根管松解术;椎间盘射频消融术;椎管扩大成形术（经椎间孔镜）
809	C05疼痛科	2022-05-15	2022-05-21	3226967	葛爱芬	女	65Y	骨质疏松伴病理性骨折	高血压病	好转	占恭豪	占恭豪	田心毅
810	C05疼痛科	2022-05-14	2022-05-24	3228453	黄爱芬	女	58Y	骨质疏松	脊柱压缩性骨折	好转	许峰	许峰	王佩芳	脊神经根射频消融术
811	C05疼痛科	2022-05-19	2022-05-27	3229448	叶岩金	男	69Y	食管恶性肿瘤	陈旧性肋骨骨折;特指手术后状态;食管溃疡;高血压病	好转	陈文俊	朱宝玲	朱宝玲
812	C05疼痛科	2022-05-18	2022-05-28	3229672	郑秀琴	女	85Y	腰椎间盘突出	骨质疏松伴病理性骨折	好转	占恭豪	占恭豪	田心毅
813	C05疼痛科	2022-05-23	2022-05-28	3229721	陈凤英	女	56Y	骨质疏松伴病理性骨折	胆囊切除术后状态;病毒性肝炎病原携带者;特指手术后状态;子宫平滑肌瘤	好转	占恭豪	占恭豪	田心毅
814	C05疼痛科	2022-05-25	2022-06-04	3232337	朱品来	男	79Y	骨质疏松伴病理性骨折	具有冠状血管成形术植入物和移植物;高血压病;冠状动脉粥样硬化性心脏病	好转	占恭豪	占恭豪	何伶俐
815	C05疼痛科	2022-06-04	2022-06-04	3232535	詹美云	女	63Y	骨质疏松伴病理性骨折		好转	占恭豪	占恭豪	何伶俐
816	C05疼痛科	2022-06-04	2022-06-06	3233228	戴国娟	女	63Y	肌筋膜炎	恶性肿瘤手术后随诊检查;高血压病;2型糖尿病;肋骨骨折;慢性胃炎;骨继发恶性肿瘤	好转	许峰	王佩芳	黄茜茜
817	C05疼痛科	2022-05-28	2022-06-11	3234753	周爱莲	女	68Y	骨质疏松伴病理性骨折		好转	许峰	许峰	黄茜茜	脊神经根射频消融术
818	C05疼痛科	2022-05-28	2022-06-12	3235407	陈美香	女	82Y	腰椎间盘突出	骨质疏松伴病理性骨折;类风湿性关节炎;肺部感染;特指手术后状态	好转	许峰	王佩芳	黄茜茜
819	C05疼痛科	2022-06-11	2022-06-15	3236662	林凤英	女	76Y	骨质疏松伴病理性骨折	肾衰竭	好转	许峰	王佩芳	黄茜茜
820	C05疼痛科	2022-06-11	2022-06-15	3236886	陈碎柳	女	78Y	肺恶性肿瘤	2型糖尿病;高血压病;脊柱骨折;骨质疏松伴病理性骨折	未愈	占恭豪	占恭豪	田心毅
821	C05疼痛科	2022-06-19	2022-06-22	3238989	陈佩兰	女	77Y	骨质疏松伴病理性骨折	循环系统操作后疾患;高血压病;冠状动脉粥样硬化性心脏病	治愈	许峰	王佩芳	黄茜茜
822	C05疼痛科	2022-06-22	2022-06-26	3240491	叶岩金	男	69Y	恶性肿瘤的维持性化疗	高血压病;陈旧性肋骨骨折;慢性胃炎;食管恶性肿瘤;特指手术后状态	好转	陈文俊	朱宝玲	朱宝玲
823	C05疼痛科	2022-06-11	2022-06-27	3240893	黄堂	男	60Y	皮肤窦道	特指手术后状态;神经痛;截瘫;复杂性肛瘘;骨折治疗后恢复期	治愈	许峰	许峰	黄茜茜	肛瘘切除术;皮下组织病损切除术
824	C05疼痛科	2022-06-22	2022-06-29	3241605	金冬琴	女	69Y	骨质疏松伴病理性骨折		好转	许峰	王佩芳	黄茜茜
825	C05疼痛科	2022-07-02	2022-07-10	3246123	章阿柳	女	83Y	骨质疏松伴病理性骨折	乳腺恶性肿瘤;骨继发恶性肿瘤;冠状动脉粥样硬化性心脏病;高血压病	好转	许峰	王佩芳	田心毅
826	C05疼痛科	2022-07-04	2022-07-10	3246346	赵灵福	男	56Y	锁骨骨折	肩胛骨骨折;肋骨骨折;肺挫伤;支气管扩张伴感染	治愈	赵友明	赵友明	柯陈荣	锁骨骨折切开复位钢板内固定术
827	C05疼痛科	2022-07-09	2022-07-16	3248468	沈娇兰	女	64Y	骨质疏松	腰椎骨折;特指手术后状态	好转	占恭豪	占恭豪	何伶俐
828	C05疼痛科	2022-07-18	2022-07-20	3250475	杨立国	男	58Y	取除骨折内固定装置	下肢动脉粥样硬化;后天性肾囊肿	其他	赵友明	赵友明	柯陈荣	胫骨内固定物取出术
829	C05疼痛科	2022-07-17	2022-07-21	3250883	苏梅玉	女	87Y	骨质疏松伴病理性骨折	高血压病;膝关节炎	好转	许峰	王佩芳	田心毅
830	C05疼痛科	2022-07-16	2022-07-23	3251337	邹多妹	女	74Y	骨质疏松伴病理性骨折	低色素性贫血;下肢静脉血栓形成	好转	许峰	王佩芳	田心毅
831	C05疼痛科	2022-07-16	2022-07-23	3251539	夏林香	女	79Y	骨质疏松	腰椎骨折;帕金森病	好转	占恭豪	占恭豪	何伶俐
832	C05疼痛科	2022-07-13	2022-07-23	3251652	叶岩金	男	69Y	恶性肿瘤的维持性化疗	食管恶性肿瘤;牙髓炎;高血压病;慢性胃炎;特指手术后状态;肋骨骨折	好转	陈文俊	朱宝玲	朱宝玲
833	C05疼痛科	2022-07-20	2022-07-28	3253826	罗春琴	女	67Y	骨质疏松	腰椎骨折;高血压病;泌尿道感染	好转	占恭豪	占恭豪	黄茜茜
834	C05疼痛科	2022-07-29	2022-08-02	3255792	陈洪莲	女	61Y	骨质疏松伴病理性骨折	高血压病	好转	占恭豪	占恭豪	黄茜茜
835	C05疼痛科	2022-08-02	2022-08-06	3257286	宋茶妹	女	82Y	骨质疏松	脊柱骨折;脊柱侧弯;高血压Ⅱ期	好转	占恭豪	占恭豪	黄茜茜
836	C05疼痛科	2022-07-30	2022-08-09	3258613	董丽华	女	77Y	骨质疏松伴病理性骨折	腰椎间盘突出;脊椎前移;高血压病	好转	占恭豪	占恭豪	黄茜茜
837	C05疼痛科	2022-07-30	2022-08-09	3258616	陈秀梅	女	66Y	腰椎间盘突出	脊椎前移;骨质疏松伴病理性骨折	治愈	占恭豪	占恭豪	黄茜茜	椎管扩大成形术（经椎间孔镜）;神经根管松解术;腰椎间盘髓核切除术;椎间盘射频消融术
838	C05疼痛科	2022-08-07	2022-08-12	3259911	陈景云	男	72Y	恶性肿瘤的维持性化疗	后天性肾囊肿;慢性上颌窦炎;颈动脉硬化;下肢动脉粥样硬化;喉恶性肿瘤;腰椎骨折;2型糖尿病;老年性脑萎缩;锁骨下静脉血栓形成;上肢静脉血栓形成;肺气肿	好转	吴剑	吴剑	张曦
839	C05疼痛科	2022-08-02	2022-08-13	3260221	陈兰香	女	77Y	骨质疏松伴病理性骨折	2型糖尿病;冠状动脉粥样硬化性心脏病;膝关节病;高血压Ⅱ期	治愈	占恭豪	占恭豪	黄茜茜	关节治疗性物质注射
840	C05疼痛科	2022-08-10	2022-08-14	3260653	叶岩金	男	69Y	恶性肿瘤的维持性化疗	食管恶性肿瘤;高血压病;慢性胃炎;特指手术后状态;肋骨骨折	好转	陈文俊	陈文俊	黄选章
841	C05疼痛科	2022-08-07	2022-08-16	3261547	林新凤	女	81Y	骨质疏松伴病理性骨折	膝关节炎;高血压病	好转	许峰	王佩芳	田心毅
842	C05疼痛科	2022-08-06	2022-08-17	3262003	金来香	女	82Y	骨质疏松伴病理性骨折	高血压病	好转	许峰	王佩芳	田心毅
843	C05疼痛科	2022-08-14	2022-08-17	3262213	金霭玲	女	69Y	骨质疏松伴病理性骨折	下背部软组织损伤;高血压病	好转	许峰	王佩芳	田心毅
844	C05疼痛科	2022-08-12	2022-08-20	3262785	余朱崇	女	69Y	骨质疏松伴病理性骨折		好转	许峰	王佩芳	田心毅	连续硬膜外阻滞术
845	C05疼痛科	2022-08-17	2022-08-23	3264317	宋德生	男	83Y	骨质疏松伴病理性骨折		好转	许峰	王佩芳	田心毅
846	C05疼痛科	2022-08-20	2022-08-27	3265601	李桂香	女	75Y	腰椎椎管狭窄	骨质疏松;脊柱骨折	好转	占恭豪	占恭豪	黄茜茜
847	C05疼痛科	2022-08-23	2022-08-29	3266746	周凤挑	女	83Y	骨质疏松伴病理性骨折	高血压病;腰椎骨折;冠状动脉支架植入后状态	治愈	申帮利	申帮利	申帮利
848	C05疼痛科	2022-08-20	2022-08-30	3267118	陈荷彩	女	64Y	骨质疏松伴病理性骨折		好转	占恭豪	占恭豪	吴彬彬
849	C05疼痛科	2022-08-25	2022-09-11	3271614	谷凤英	女	62Y	骨质疏松伴病理性骨折	高血压病;腰椎间盘突出	治愈	占恭豪	申帮利	申帮利
850	C05疼痛科	2022-09-11	2022-09-17	3273834	张明建	男	33Y	股骨粗隆间骨折	前列腺结石;股骨颈骨折;股骨粗隆下骨折	治愈	赵友明	赵友明	柯陈荣	股骨骨折闭合复位钢针内固定术
851	C05疼痛科	2022-09-03	2022-09-18	3274187	郑细满	女	63Y	神经痛	颅骨骨折;手术后恢复期;颈椎骨折;骨折治疗后恢复期	好转	占恭豪	占恭豪	黄茜茜	周围神经破坏术
852	C05疼痛科	2022-09-13	2022-09-18	3274207	陈阿雪	女	71Y	骨质疏松	脊柱骨折;2型糖尿病	好转	占恭豪	占恭豪	黄茜茜
853	C05疼痛科	2022-09-03	2022-09-20	3275009	江阿招	女	70Y	骨质疏松伴病理性骨折	类风湿性关节炎;胸椎骨折;脊柱压缩性骨折;肩撞击综合征;特指手术后状态;高血压病	好转	占恭豪	占恭豪	黄茜茜
854	C05疼痛科	2022-09-18	2022-09-25	3276682	王阿英	女	78Y	骨质疏松伴病理性骨折	脊柱压缩性骨折;膝关节炎;窦性心律失常;高血压病;2型糖尿病;室性早搏;房性早搏;不完全性右束支传导阻滞	好转	占恭豪	占恭豪	黄茜茜
855	C05疼痛科	2022-08-27	2022-09-27	3277459	李娒弟	女	81Y	骨质疏松伴病理性骨折	脊柱骨折;高血压病	好转	许峰	王佩芳	田心毅
856	C05疼痛科	2022-09-19	2022-09-27	3277496	张雪梅	女	77Y	骨质疏松伴病理性骨折	特指手术后状态;后天性肾囊肿;心律失常;慢性胃炎;直肠息肉;高血压病;Ⅰ度房室传导阻滞;完全性右束支传导阻滞	好转	占恭豪	占恭豪	黄茜茜	胃镜检查
857	C05疼痛科	2022-09-21	2022-09-30	3279116	金国英	女	52Y	骨质疏松伴病理性骨折	高血压病;胸椎骨折	好转	许峰	王佩芳	田心毅
858	C05疼痛科	2022-09-29	2022-10-08	3281125	徐成钗	女	65Y	骨质疏松	胸椎骨折;高血压病	好转	占恭豪	占恭豪	黄茜茜
859	C05疼痛科	2022-09-13	2022-10-09	3281494	许利军	女	67Y	骨质疏松伴病理性骨折	脊柱骨折;癫痫;抑郁症	好转	占恭豪	占恭豪	黄茜茜
860	C05疼痛科	2022-10-08	2022-10-11	3282272	吴玉兰	女	69Y	骨质疏松伴病理性骨折	高血压病;2型糖尿病	好转	占恭豪	吴彬彬	黄茜茜
861	C05疼痛科	2022-10-09	2022-10-15	3283775	李梅柳	女	70Y	骨质疏松伴病理性骨折	高血压病	好转	许峰	许峰	田心毅
862	C05疼痛科	2022-10-11	2022-10-15	3283907	王国松	男	76Y	骨质疏松伴病理性骨折		好转	占恭豪	占恭豪	黄茜茜
863	C05疼痛科	2022-10-11	2022-10-17	3284619	何巧钗	女	79Y	骨质疏松伴病理性骨折	腹股沟斜疝;心动过缓;下肢动脉粥样硬化	好转	许峰	许峰	田心毅
864	C05疼痛科	2022-10-08	2022-10-22	3286405	陈阿菊	女	78Y	腰椎间盘突出	高血压病;骨质疏松伴病理性骨折	治愈	占恭豪	吴彬彬	黄茜茜	椎管扩大成形术（经椎间孔镜）;神经根管松解术;腰椎间盘髓核切除术;椎间盘射频消融术
865	C05疼痛科	2022-10-08	2022-10-22	3286413	张纯福	男	65Y	骨质疏松伴病理性骨折	肾结石;腰椎骨折;心律失常;心房颤动;冠状动脉粥样硬化性心脏病;循环系统特指操作后疾患;胆囊切除术后状态;高血压病;高脂血症	好转	占恭豪	吴彬彬	黄茜茜
866	C05疼痛科	2022-10-15	2022-10-22	3286416	曾寿菊	女	55Y	腰椎间盘突出	骨折治疗后恢复期;高血压病	治愈	占恭豪	占恭豪	黄茜茜	腰椎间盘髓核切除术;神经根管松解术;椎管扩大成形术（经椎间孔镜）;椎间盘射频消融术
867	C05疼痛科	2022-10-10	2022-10-22	3286541	黄奶儿	女	61Y	骨质疏松伴病理性骨折	腰椎骨折;高血压病;1型糖尿病	治愈	占恭豪	申帮利	申帮利
868	C05疼痛科	2022-10-10	2022-10-23	3287321	舒碎葱	女	69Y	腰椎间盘突出	高血压病;膝关节病;下肢动脉粥样硬化;腔隙性脑梗死;髋关节病;脊柱压缩性骨折	治愈	许峰	许峰	田心毅	连续硬膜外阻滞术;脊神经根射频消融术
869	C05疼痛科	2022-10-22	2022-10-29	3289361	郑合梅	女	69Y	骨质疏松伴病理性骨折	肺部感染;胸腔积液;肋骨骨折;子宫积水	治愈	占恭豪	占恭豪	黄茜茜
870	C05疼痛科	2022-10-24	2022-10-29	3289362	卢美华	女	75Y	骨质疏松伴病理性骨折	高血压病	好转	占恭豪	占恭豪	黄茜茜
871	C05疼痛科	2022-10-26	2022-10-29	3289477	徐秋艳	女	48Y	恶性肿瘤的维持性化疗	卵巢恶性肿瘤;心包积液;骨质疏松;取除骨折内固定装置;肺结节	好转	吴剑	吴剑	218358
872	C05疼痛科	2022-10-29	2022-11-01	3290657	韩秀兰	女	88Y	腰椎椎管狭窄	骨质疏松;脊柱压缩性骨折;高血压病;2型糖尿病;肾盂肾炎;具有心脏起搏器	好转	占恭豪	占恭豪	黄茜茜
873	C05疼痛科	2022-10-31	2022-11-03	3291696	应惠芬	女	76Y	取除骨折内固定装置	高血压病;肝钙化灶;脂肪肝;心律失常	其他	翁益民	翁益民	项光恒	踝关节内固定物取出术
874	C05疼痛科	2022-10-29	2022-11-05	3292004	林新兰	女	59Y	腰椎间盘突出	胸椎骨折;子宫切除术后状态	好转	许峰	许峰	田心毅
875	C05疼痛科	2022-10-26	2022-11-05	3292007	徐新妹	女	73Y	腰椎间盘突出	骨质疏松伴病理性骨折;膝关节病;下肢动脉粥样硬化;腰椎骨折	治愈	许峰	何伶俐	田心毅
876	C05疼痛科	2022-11-01	2022-11-12	3294751	胡香雪	女	58Y	骨质疏松伴病理性骨折	2型糖尿病;胸椎骨折;胸椎椎管狭窄;高血压病	好转	占恭豪	占恭豪	王佩芳
877	C05疼痛科	2022-11-12	2022-11-14	3295668	王爵飞	男	80Y	肺恶性肿瘤	下肢静脉血栓形成;呼吸衰竭;慢性阻塞性肺病;慢性肺源性心脏病;心功能不全;心律失常;心房颤动;肝功能不全;低蛋白血症;高钾血症;凝血缺陷;下肢动脉粥样硬化;多发性脑梗死;主动脉钙化;高脂血症;肝囊肿;后天性肾囊肿;前列腺增生;髋臼骨折	未愈	吴剑	吴剑	黄选章
878	C05疼痛科	2022-11-01	2022-11-15	3296304	郑细满	女	64Y	神经痛	特指手术后状态;骨折治疗后恢复期	好转	占恭豪	吴彬彬	黄茜茜
879	C05疼痛科	2022-11-05	2022-11-19	3297650	施翠珠	女	77Y	腰椎间盘突出	胸椎骨折;脊柱压缩性骨折;骨质疏松;高血压病	治愈	许峰	许峰	田心毅	周围神经破坏术
880	C05疼痛科	2022-11-13	2022-11-19	3297661	许夏领	女	66Y	肱骨上端骨折	骨质疏松;脂肪肝;胆囊病变;后天性肾囊肿;特指手术后状态;肩袖损伤	治愈	赵友明	赵友明	柯陈荣	关节软骨修复术;肩袖修补术;肱骨骨折切开复位钢板内固定术
881	C05疼痛科	2022-11-09	2022-11-20	3297966	黄永福	男	77Y	腰椎椎管狭窄	2型糖尿病;高血压病;骨质疏松伴病理性骨折	治愈	占恭豪	申帮利	申帮利	椎间盘射频消融术;椎管扩大成形术（经椎间孔镜）;神经根管松解术;腰椎间盘髓核切除术
882	C05疼痛科	2022-11-13	2022-11-27	3300738	梁朱绿	女	72Y	骨质疏松伴病理性骨折	高血压病;下肢动脉粥样硬化	好转	许峰	许峰	田心毅
883	C05疼痛科	2022-11-26	2022-12-03	3302830	陈梅聪	女	58Y	足痛	骨质疏松伴病理性骨折	好转	占恭豪	占恭豪	黄茜茜
884	C05疼痛科	2022-12-04	2022-12-07	3304618	周菜妹	女	85Y	骨质疏松伴病理性骨折	腰椎骨折;心动过缓	治愈	许峰	许峰	田心毅
885	C05疼痛科	2022-12-04	2022-12-07	3304851	蒋新媛	女	85Y	骨质疏松伴病理性骨折	高血压病	好转	许峰	许峰	田心毅
886	C05疼痛科	2022-12-03	2022-12-10	3305570	陈玲弟	女	73Y	腰椎间盘突出	脊柱压缩性骨折	好转	占恭豪	占恭豪	黄茜茜	椎间盘射频消融术;椎管扩大成形术（经椎间孔镜）;神经根管松解术;腰椎间盘髓核切除术
887	C05疼痛科	2022-12-06	2022-12-10	3305729	朱昌槐	男	86Y	骨质疏松伴病理性骨折	冠状动脉粥样硬化性心脏病;前列腺恶性肿瘤个人史	好转	占恭豪	占恭豪	王佩芳
888	C05疼痛科	2022-12-03	2022-12-12	3306725	张正芳	女	83Y	骨质疏松	胸椎骨折;高血压病;2型糖尿病;特指手术后状态	好转	占恭豪	占恭豪	王佩芳
889	C05疼痛科	2022-12-10	2022-12-13	3306998	方才娇	女	68Y	骨质疏松伴病理性骨折	闭合性胫骨平台骨折;膝关节痛;高血压病;2型糖尿病	治愈	占恭豪	占恭豪	黄茜茜
890	C05疼痛科	2022-12-11	2022-12-17	3308445	张秀兰	女	86Y	腰椎间盘突出	骨质疏松;颈椎关节强硬;高血压病;骨折治疗后恢复期	好转	许峰	许峰	田心毅
891	C05疼痛科	2022-12-03	2022-12-19	3309291	郑银媛	女	71Y	神经痛	骨质疏松;胸椎骨折;胆囊憩室;腹主动脉粥样硬化;慢性胃炎;食管炎;后天性肾囊肿;下肢动脉粥样硬化	好转	占恭豪	占恭豪	黄茜茜	连续硬膜外阻滞术
892	C05疼痛科	2022-12-17	2022-12-24	3311045	项珠娒	女	69Y	骨质疏松伴病理性骨折		好转	占恭豪	占恭豪	王佩芳
893	C05疼痛科	2022-12-17	2022-12-24	3311193	詹雪章	男	68Y	腰椎间盘突出	高血压病;冠状动脉粥样硬化性心脏病;下肢动脉粥样硬化;骨折治疗后恢复期	治愈	许峰	许峰	田心毅	椎间盘射频消融术;椎管扩大成形术（经椎间孔镜）;神经根管松解术;腰椎间盘髓核切除术
894	C05疼痛科	2022-12-19	2022-12-28	3312934	陈佩兰	女	78Y	骨质疏松伴病理性骨折	心律失常;高血压病;下肢动脉粥样硬化;Ⅰ度房室传导阻滞;完全性左束支传导阻滞;腰椎间盘突出;冠状动脉粥样硬化性心脏病	好转	许峰	许峰	田心毅
895	C05疼痛科	2022-12-24	2022-12-29	3313193	张流月	女	79Y	骨质疏松伴病理性骨折	胸椎骨折;高血压病;慢性肾炎综合征	治愈	占恭豪	占恭豪	王佩芳
896	C05疼痛科	2022-12-10	2022-12-29	3313350	方红珠	女	73Y	腰椎椎管狭窄	颈椎关节强硬;高血压病;2型糖尿病;骨质疏松伴病理性骨折;脊柱压缩性骨折	好转	占恭豪	占恭豪	黄茜茜	腰椎间盘切除伴椎板切除术;椎管扩大成形术（经椎间孔镜）;椎间盘射频消融术;神经根管松解术
897	C06肿瘤放化疗、神经康复	2022-01-03	2022-01-03	3178829	蔡秋芽	女	56Y	恶性肿瘤的维持性化疗	后天性肾囊肿;乳腺恶性肿瘤;脂肪肝;腰椎骨折;骨继发恶性肿瘤	好转	吴剑	吴剑	吴聪聪
898	C06肿瘤放化疗、神经康复	2025-12-27	2022-01-04	3178907	徐江山	男	52Y	肾上腺良性肿瘤	肺占位性病变;肋骨骨折;特指手术后状态;2型糖尿病;肌肉骨骼系统特指部位诊断性影像检查异常所见;高血压病	好转	吴剑	吴剑	吴聪聪	肾穿刺活体组织检查术（肾穿）
899	C06肿瘤放化疗、神经康复	2025-11-16	2022-01-08	3180426	林永勇	男	59Y	创伤性硬膜下出血	胸腔积液;开放性胸部损伤;肌腱和肌肉损伤;2型糖尿病;高血压病;乳突炎;肾结石;腔隙性脑梗死;头部外伤;颅底骨折;多发性损伤;创伤性蛛网膜下腔出血;头皮血肿;贝尔面瘫;臂丛神经损伤;前庭功能障碍;特指听觉异常;肩胛骨骨折	好转	刘宝华	刘宝华	黄世园
900	C06肿瘤放化疗、神经康复	2022-01-11	2022-01-11	3181524	陈月华	女	65Y	为肿瘤化学治疗疗程	骨折治疗后恢复期;肺恶性肿瘤	好转	吴剑	吴剑	张曦
901	C06肿瘤放化疗、神经康复	2025-12-01	2022-01-12	3181940	张宜群	女	82Y	帕金森病	骨质疏松;肋骨骨折;骨折治疗后恢复期;胸腔积液;脂肪肝;肺结节;慢性乙型病毒性肝炎;高血压病;老年性脑萎缩;慢性上颌窦炎	好转	刘宝华	刘宝华	吕德钊
902	C06肿瘤放化疗、神经康复	2025-12-25	2022-01-17	3181107	陈顺涛	男	7Y	胫腓骨干骨折	特定性运动功能发育障碍;运动障碍;特指手术后状态	好转	刘宝华	刘宝华	王特	胫骨骨折闭合复位髓内针内固定术
903	C06肿瘤放化疗、神经康复	2022-01-08	2022-01-26	3186813	张义飞	男	29Y	臂丛神经损害	肾结石;后天性肾囊肿;胸腔积液;腰骶部脊柱骨折;颈椎骨折	好转	刘宝华	刘宝华	吕德钊
904	C06肿瘤放化疗、神经康复	2022-01-19	2022-01-29	3187329	徐江山	男	52Y	肾上腺良性肿瘤	肺占位性病变;特指手术后状态;肋骨骨折;高血压病;2型糖尿病;肌肉骨骼系统特指部位诊断性影像检查异常所见	未愈	吴剑	吴剑	吴聪聪	CT引导下胸腔穿刺术
905	C06肿瘤放化疗、神经康复	2022-01-01	2022-02-01	3188694	陈良妹	女	81Y	肺恶性肿瘤	子宫平滑肌瘤;恶性肿瘤术后放射治疗;肾结石;骨继发恶性肿瘤;腔隙性脑梗死;肋骨骨折;高血压病;肝囊肿	未愈	吴剑	吴剑	张曦
906	C06肿瘤放化疗、神经康复	2022-02-01	2022-02-01	3188875	蔡秋芽	女	56Y	乳腺恶性肿瘤	骨继发恶性肿瘤;腰椎骨折;脂肪肝;后天性肾囊肿	好转	吴剑	吴剑	吴聪聪
907	C06肿瘤放化疗、神经康复	2022-01-08	2022-02-11	3192509	赵理达	男	36Y	创伤性硬膜下出血	手术后随诊检查;头部外伤;硬脑膜下积液;颅骨缺损修补;脑积水;肾积水伴输尿管结石;轻度认知障碍;由于活动能力降低而需要帮助;闭合性胫骨平台骨折;腓骨骨折;肝囊肿;言语障碍	好转	刘宝华	刘宝华	吕德钊	肉毒素注射
908	C06肿瘤放化疗、神经康复	2022-01-05	2022-02-11	3192812	朱云喜	男	85Y	脑积水	陈旧性肋骨骨折;肝囊肿;胆囊结石;特指肾盂积水;轻度认知障碍;睡眠障碍;由于活动能力降低而需要帮助;中枢神经系统脱髓鞘病;老年性脑萎缩;下肢动脉粥样硬化;肺部感染;胸腔积液	好转	刘宝华	刘宝华	吕德钊	腰椎穿刺;经外周静脉穿刺中心静脉插管术[PICC];深静脉穿刺
909	C06肿瘤放化疗、神经康复	2022-02-01	2022-02-12	3193157	李兴弟	男	64Y	脑梗死	偏瘫;进食障碍;由于活动能力降低而需要帮助;多发性脑梗死;2型糖尿病;高血压病;颈内动脉闭塞;脑挫伤;创伤性蛛网膜下腔出血;创伤性硬膜下出血;顶骨骨折;硬脑膜下积液;头皮血肿;高血压性心脏病;肺部感染;胸腔积液;后天性肾囊肿;无症状性菌尿	好转	刘宝华	刘宝华	商萍
910	C06肿瘤放化疗、神经康复	2025-12-23	2022-02-22	3195766	张孚生	男	66Y	肺恶性肿瘤	肺结节;特指手术后状态;气管食道瘘;肺部感染;放射性肺炎;陈旧性肋骨骨折	好转	吴剑	吴剑	吴聪聪
911	C06肿瘤放化疗、神经康复	2022-02-22	2022-02-26	3196677	林美香	女	86Y	腰椎骨折	高血压病;2型糖尿病性肾病;低钾血症;椎管狭窄;腰椎退行性病变;椎管内蛛网膜囊肿	好转	刘宝华	刘宝华	商萍
912	C06肿瘤放化疗、神经康复	2022-02-26	2022-02-28	3197775	王小罗	男	65Y	恶性肿瘤术后放射治疗	骨折治疗后恢复期;躯干骨继发恶性肿瘤;肾恶性肿瘤	好转	吴剑	吴剑	吴聪聪
913	C06肿瘤放化疗、神经康复	2022-01-26	2022-03-07	3200284	陈锡金	男	90Y	脑梗死	后天性肾囊肿;肾结石;肝钙化灶;肾上腺囊肿;陈旧性肋骨骨折;手术后恢复期;言语障碍;轻度认知障碍;进食障碍;大便失禁;由于活动能力降低而需要帮助;多发性脑梗死;肺部感染;胸腔积液;高血压病;低钠血症;股动脉血栓形成;下肢动脉粥样硬化	好转	刘宝华	刘宝华	商萍	膀胱造口术
914	C06肿瘤放化疗、神经康复	2022-03-03	2022-04-01	3209118	赵理达	男	36Y	创伤性硬膜下出血	轻度认知障碍;硬脑膜下积液;言语障碍;后天性肾囊肿;特指肾盂积水;颅骨缺损修补;特定性运动功能发育障碍;特指手术后状态;取除骨折内固定装置;腓骨骨折;泌尿道感染;输尿管结石;肝囊肿;脑积水;手术后随诊检查	好转	刘宝华	刘宝华	吕德钊	经外周静脉穿刺中心静脉插管术[PICC];深静脉穿刺
915	C06肿瘤放化疗、神经康复	2022-03-21	2022-04-25	3217873	叶德花	女	68Y	脑出血	2型糖尿病;言语障碍;高血压病;大便失禁;肋骨骨折;特指手术后状态;泌尿道感染;多发性脑梗死;特定性运动功能发育障碍;低蛋白血症;低钙血症;低钾血症;偏瘫;慢性乙型病毒性肝炎	好转	刘宝华	刘宝华	吕德钊
916	C06肿瘤放化疗、神经康复	2022-04-09	2022-04-27	3218122	周月槎	男	93Y	脑梗死	陈旧性肺结核;血管瘤;低钠血症;低钾血症;下肢静脉血栓形成;胸腔积液;肺部感染;肝囊肿;前列腺增生;前列腺结石;病理性骨折;陈旧性肋骨骨折;出血性脑梗死;特定性运动功能发育障碍;后天性肾囊肿;老年性脑萎缩;言语障碍;进食障碍;高血压病	好转	刘宝华	刘宝华	吕德钊
917	C06肿瘤放化疗、神经康复	2022-03-01	2022-04-28	3218893	张美翠	女	82Y	脑梗死	急性心肌梗死;陈旧性肋骨骨折;颈动脉硬化;言语障碍;由于活动能力降低而需要帮助;子宫切除术后状态;进食障碍;高血压病;低蛋白血症;低钾血症;偏瘫;冠状动脉粥样硬化性心脏病;脑出血;下肢静脉血栓形成;肺部感染;泌尿道感染;肾错构瘤	好转	刘宝华	刘宝华	吕德钊	经外周静脉穿刺中心静脉插管术[PICC]
918	C06肿瘤放化疗、神经康复	2022-03-27	2022-04-28	3219255	郑爱鹤	女	77Y	脑梗死	肥厚型梗阻性心肌病;心力衰竭;心律失常;胆囊结石;脑出血后遗症;上肢动脉粥样硬化;下肢动脉粥样硬化;颈动脉硬化;肺结节;完全性右束支传导阻滞;室性心动过速;阵发性房性心动过速;高脂血症;甲状腺结节;股骨骨折;睡眠障碍;骨质疏松;泌尿道感染	好转	刘宝华	刘宝华	吕德钊
919	C06肿瘤放化疗、神经康复	2022-04-28	2022-05-02	3220441	张美翠	女	83Y	脑梗死	颈动脉硬化;高血压病;进食障碍;子宫切除术后状态;特指治疗后恢复期;言语障碍;循环系统特指操作后疾患;特定性运动功能发育障碍;陈旧性肋骨骨折;肾错构瘤;泌尿道感染;肺部感染;下肢静脉血栓形成;脑出血;冠状动脉粥样硬化性心脏病;偏瘫	好转	刘宝华	刘宝华	吕德钊
920	C06肿瘤放化疗、神经康复	2022-04-11	2022-05-11	3223573	李送招	女	73Y	脑梗死	颈内动脉粥样硬化;低钾血症;偏瘫;2型糖尿病;骨折治疗后恢复期;由于活动能力降低而需要帮助;锁骨下动脉粥样硬化;下肢动脉粥样硬化;高血压病;进食障碍	好转	刘宝华	商萍	黄婷婷2
921	C06肿瘤放化疗、神经康复	2022-04-04	2022-05-17	3225847	史碎香	女	74Y	脊髓损伤	食管裂孔疝;肺部感染;胸腔积液;高血压性心脏病;贫血;低蛋白血症;肺结节;颈动脉硬化;排尿困难;乙型肝炎后肝硬化失代偿期;脊柱侧弯;由于活动能力降低而需要帮助;骨折治疗后恢复期;皮肤感觉异常;运动障碍;后天性肾囊肿;肾结石;肺特指疾患	好转	刘宝华	商萍	黄婷婷2	腹腔穿刺术
922	C06肿瘤放化疗、神经康复	2022-04-24	2022-05-30	3230509	赵理达	男	37Y	脑外伤后综合征	闭合性胫骨平台骨折;硬脑膜下积液;脑积水;肝囊肿;输尿管结石;泌尿道感染;特指肾盂积水;颅骨缺损修补;特定性运动功能发育障碍;腓骨骨折;手术后随诊检查;言语障碍;创伤性硬膜下出血;后天性肾囊肿;肾结石;轻度认知障碍	好转	刘宝华	商萍	胡晓晓	肉毒素注射
923	C06肿瘤放化疗、神经康复	2022-04-28	2022-05-30	3230801	郑爱鹤	女	77Y	脑梗死后遗症	肺部感染;胸腔积液;心力衰竭;高脂血症;甲状腺结节;肺结节;颈动脉硬化;下肢动脉粥样硬化;脑出血后遗症;胆囊结石;心律失常;肥厚型梗阻性心肌病;高血压病;麻痹[瘫痪]综合征;手术后随诊检查;言语障碍;吞咽困难;慢性肾衰竭;肺不张;股骨骨折	好转	刘宝华	刘宝华	吕德钊
924	C06肿瘤放化疗、神经康复	2022-05-17	2022-06-01	3231281	谢美莲	女	60Y	创伤性蛛网膜下腔出血	由于活动能力降低而需要帮助;创伤性硬膜下出血;下腔静脉血栓形成;高血压病;轻度认知障碍;2型糖尿病;头部外伤;脑挫伤;枕骨骨折;贫血;高脂血症;特指手术后状态	好转	刘宝华	商萍	黄婷婷2
925	C06肿瘤放化疗、神经康复	2022-05-02	2022-06-08	3233915	张美翠	女	83Y	脑梗死	颈动脉硬化;下肢动脉粥样硬化;高血压病;进食障碍;陈旧性肋骨骨折;肾错构瘤;泌尿道感染;肺部感染;下肢静脉血栓形成;脑出血;冠状动脉粥样硬化性心脏病;偏瘫;低钾血症;低蛋白血症;言语障碍;子宫切除术后状态;由于活动能力降低而需要帮助	好转	刘宝华	刘宝华	吕德钊
926	C06肿瘤放化疗、神经康复	2022-05-21	2022-06-12	3235283	周欣华	女	40Y	肱骨髁间骨折	肘关节僵硬;特指手术后状态	好转	刘宝华	商萍	覃燕青
927	C06肿瘤放化疗、神经康复	2022-05-14	2022-06-15	3236535	李送招	女	73Y	脑梗死	进食障碍;偏瘫;膝关节特指部位扭伤;膝关节积液;特定性运动功能发育障碍;取除骨折内固定装置;动脉粥样硬化;膝关节病;2型糖尿病;半月板变性;高血压病	好转	刘宝华	商萍	胡晓晓
928	C06肿瘤放化疗、神经康复	2022-05-25	2022-06-25	3240254	叶玉霞	女	82Y	肺栓塞	冠状动脉支架植入后状态;单纯性肾囊肿;特指肾盂积水;胆囊结石;下肢特指深部脉管静脉炎和血栓性静脉炎;特指动脉动脉粥样硬化;老年性脑萎缩;特定性运动功能发育障碍;2型糖尿病;陈旧性肋骨骨折;泌尿道感染;肺部感染;冠状动脉粥样硬化性心脏病	好转	刘宝华	商萍	吕德钊	下肢静脉滤器置入术
929	C06肿瘤放化疗、神经康复	2022-05-28	2022-06-26	3240652	叶德花	女	68Y	脑出血	陈旧性肋骨骨折;大便失禁;偏瘫;特指手术后状态;由于活动能力降低而需要帮助;言语障碍;多发性脑梗死;高血压病;2型糖尿病;慢性乙型病毒性肝炎	好转	刘宝华	商萍	吕德钊
930	C06肿瘤放化疗、神经康复	2022-05-14	2022-06-27	3240791	林正元	男	87Y	消化器官动态未定肿瘤	高血压病;特指甲状腺功能减退症;肺结节病;骨质疏松;前列腺结石;前列腺增生;肝囊肿;肺部感染;支气管扩张;脑出血;冠状动脉粥样硬化性心脏病;贫血;糖尿病;双眼白内障;骨折;单纯性肾囊肿;腰骶椎间盘突出;肝内胆管结石;支气管哮喘，非危重	好转	刘宝华	刘宝华	吕德钊	经外周静脉穿刺中心静脉插管术[PICC]
931	C06肿瘤放化疗、神经康复	2022-06-12	2022-06-27	3241123	徐云贵	男	55Y	基底节出血	由于活动能力降低而需要帮助;单纯性肾囊肿;颈动脉硬化;高血压病;陈旧性肋骨骨折;前列腺增生;脂肪肝;偏瘫;肝血管瘤	好转	刘宝华	商萍	吕德钊
932	C06肿瘤放化疗、神经康复	2022-05-30	2022-07-05	3244209	郑爱鹤	女	77Y	脑梗死	颈动脉硬化;高脂血症;陈旧性股骨骨折;完全性右束支传导阻滞;阵发性房性心动过速;心律失常;心力衰竭;肥厚型梗阻性心肌病;泌尿道感染;肺部感染;轻度贫血;慢性肾衰竭;2型糖尿病性肾病;高血压病;脑出血后遗症;由于活动能力降低而需要帮助	好转	刘宝华	商萍	胡晓晓
933	C06肿瘤放化疗、神经康复	2022-06-25	2022-07-09	3245601	李送招	女	73Y	脑梗死	偏瘫;由于活动能力降低而需要帮助;动脉粥样硬化;颈内动脉粥样硬化;锁骨下动脉粥样硬化;下肢动脉粥样硬化;膝关节积液;2型糖尿病;肩回旋套肌腱损伤;胫骨骨折;膝关节病;半月板变性;膝关节特指部位扭伤;高血压病	好转	刘宝华	商萍	吕德钊
934	C06肿瘤放化疗、神经康复	2022-06-27	2022-07-24	3252291	赵理达	男	37Y	创伤性硬膜下出血	颅内损伤;硬脑膜下积液;颅骨缺损修补;脑积水;言语障碍;轻度认知障碍;肾积水伴肾输尿管结石;闭合性胫骨平台骨折;腓骨骨折;肝囊肿;单纯性肾囊肿;泌尿道感染;由于活动能力降低而需要帮助	好转	刘宝华	商萍	吕德钊
935	C06肿瘤放化疗、神经康复	2022-07-13	2022-07-27	3251347	陈景云	男	72Y	为肿瘤化学治疗疗程	喉恶性肿瘤;静脉栓塞和血栓形成;肺气肿;后天性肾囊肿;慢性上颌窦炎;老年性脑萎缩;下肢动脉粥样硬化;腰椎骨折;2型糖尿病;颈动脉硬化	好转	吴剑	吴剑	张曦
936	C06肿瘤放化疗、神经康复	2022-05-30	2022-08-14	3260579	占月秀	女	63Y	颅内损伤	颈内静脉血栓形成;骨盆骨折;多发性肋骨骨折;肩胛骨骨折;肺挫伤;消化道出血;失血性休克;特指手术后状态;皮肤和皮下组织局部感染;肺部感染;泌尿道感染;低蛋白血症;下肢特指深部脉管静脉炎和血栓性静脉炎;颈动脉硬化;腰椎间盘突出;高尿酸血症	好转	刘宝华	商萍	覃燕青
937	C06肿瘤放化疗、神经康复	2022-07-02	2022-08-15	3261239	叶利华	男	83Y	脑出血	肝囊肿;胸腔积液;贫血;腔隙性脑梗死;后天性肾囊肿;甲状腺结节;前列腺增生;由于活动能力降低而需要帮助;高血压性心脏病;尿毒症;慢性肾衰竭;股骨骨折;前列腺结石	好转	刘宝华	刘宝华	吕德钊
938	C06肿瘤放化疗、神经康复	2022-08-20	2022-08-29	3266589	邹祖祥	男	85Y	脑梗死	言语障碍;轻度认知障碍;神经源性肠;由于活动能力降低而需要帮助;肺部感染;Ⅲ期褥疮;股骨颈骨折;下肢特指深部脉管静脉炎和血栓性静脉炎;主动脉瓣硬化;心动过缓;高血压病;肺结节;脂肪肝;冠状动脉粥样硬化(狭窄);颈动脉硬化;下肢动脉粥样硬化	未愈	刘宝华	商萍	胡晓晓
939	C06肿瘤放化疗、神经康复	2022-09-04	2022-09-04	3269037	王小罗	男	65Y	恶性肿瘤术后放射治疗	肾恶性肿瘤;躯干骨继发恶性肿瘤;下肢骨折;脂肪瘤;直肠恶性肿瘤	好转	吴剑	吴剑	218358
940	C06肿瘤放化疗、神经康复	2022-08-31	2022-09-05	3269626	许家胜	男	55Y	颈部恶性肿瘤	陈旧性肋骨骨折;腔隙性脑梗死;老年性脑萎缩;慢性上颌窦炎;乳突炎;肾上腺良性肿瘤;肝血管瘤;颈部淋巴结继发恶性肿瘤;胸腔积液;心包积液	治愈	陈文俊	陈文俊	吴聪聪
941	C06肿瘤放化疗、神经康复	2022-08-18	2022-09-13	3272345	严国忠	男	88Y	脑梗死	吞咽困难;下肢动脉粥样硬化;甲状腺结节;胆囊结石;肝囊肿;脂肪肝;尾骨骨折;慢性肾脏病3期;肝病;高脂血症;高尿酸血症;2型糖尿病;高血压病;肺部感染;锁骨下动脉粥样硬化;颈动脉硬化;轻度认知障碍;言语障碍;由于活动能力降低而需要帮助	好转	刘宝华	商萍	覃燕青
942	C06肿瘤放化疗、神经康复	2022-06-12	2022-09-18	3274361	徐忠忠	女	89Y	股骨粗隆间骨折	脑梗死;下肢静脉血栓形成;痴呆;肺部感染;泌尿道感染;运动障碍;由于活动能力降低而需要帮助;言语障碍;吞咽困难;特指癫痫;高血压病;2型糖尿病;后天性肾囊肿;肾结石;肝囊肿;颈动脉硬化;锁骨下动脉粥样硬化;低蛋白血症;脑血管病后遗症	好转	刘宝华	商萍	覃燕青	股骨骨折闭合复位螺钉内固定术
943	C06肿瘤放化疗、神经康复	2022-09-18	2022-09-27	3277773	王玲秋	女	94Y	痴呆	吞咽困难;由于活动能力降低而需要帮助;肺部感染;高脂血症;口角炎;低钾血症;骨折治疗后恢复期	好转	刘宝华	商萍	覃燕青
944	C06肿瘤放化疗、神经康复	2022-09-13	2022-09-30	3279390	林阿莲	女	63Y	肩多发神经损伤	2型糖尿病;室性早搏;肱骨骨折;鹰嘴骨折;耻骨骨折;腓骨骨折;肩回旋套肌腱损伤;腰椎间盘突出;颈椎间盘突出	好转	刘宝华	商萍	覃燕青	神经根管松解术
945	C06肿瘤放化疗、神经康复	2022-09-13	2022-10-08	3281256	姜美钗	女	87Y	脑梗死	锁骨下动脉粥样硬化;下肢动脉粥样硬化;由于活动能力降低而需要帮助;运动障碍;尿失禁;环性心境人格;骨质疏松伴病理性骨折;陈旧性胸椎骨折;脑积水;高血压病;泌尿道感染;颈动脉硬化;股动脉闭塞;关节周围炎;心律失常;膀胱结石	好转	刘宝华	商萍	覃燕青	尿流量测定[UFR];经外周静脉穿刺中心静脉插管术[PICC]
946	C06肿瘤放化疗、神经康复	2022-10-04	2022-10-08	3281378	徐秋艳	女	48Y	恶性肿瘤的维持性化疗	卵巢恶性肿瘤;骨质疏松;骨折治疗后恢复期	好转	吴剑	吴剑	218358
947	C06肿瘤放化疗、神经康复	2022-10-08	2022-10-26	3288471	林阿莲	女	63Y	肩多发神经损伤	腰椎间盘突出;颈椎间盘突出;2型糖尿病性视网膜病变;室性早搏;肱骨骨折;肌皮神经损伤;桡神经损害;腋神经损伤;正中神经损害;骨折治疗后恢复期;鹰嘴骨折;耻骨骨折;腓骨骨折;肩回旋套肌腱损伤	好转	刘宝华	商萍	覃燕青
948	C06肿瘤放化疗、神经康复	2022-09-20	2022-10-29	3289812	王樟树	男	77Y	脑出血	由于活动能力降低而需要帮助;轻度认知障碍;运动障碍;肺部感染;高血压病;心房颤动;帕金森病;阿尔茨海默病;脑梗死后遗症;骨折内固定术后疼痛;皮肤慢性溃疡;Ⅱ期褥疮;胸腔积液;下肢动脉粥样硬化;肝囊肿;胆囊管结石;后天性肾囊肿;肾结石	好转	刘宝华	商萍	218316
949	C06肿瘤放化疗、神经康复	2022-10-21	2022-10-31	3290504	李扎孝	男	53Y	恶性肿瘤的维持性化疗	手术后恶性肿瘤化学治疗;颈部淋巴结继发恶性肿瘤;骨继发恶性肿瘤;静脉栓塞和血栓形成;2型糖尿病性视网膜病变;黄斑水肿;双眼白内障;慢性乙型病毒性肝炎;肺结节;骨折治疗后恢复期	好转	吴剑	吴剑	黄选章
950	C06肿瘤放化疗、神经康复	2022-10-09	2022-11-02	3291428	朱文成	男	53Y	脑出血	吞咽困难;进食障碍;运动障碍;由于活动能力降低而需要帮助;脑疝;脑挫伤;硬膜外血肿;手术后恢复期;肩胛骨骨折;下肢动脉粥样硬化;肺部感染;胸腔积液;肺大泡;慢性乙型病毒性肝炎;肝囊肿;输尿管积水;特指肾盂积水;前列腺钙化灶;肝硬化	好转	刘宝华	商萍	218316
951	C06肿瘤放化疗、神经康复	2022-11-07	2022-11-11	3294644	李扎孝	男	53Y	化疗后骨髓抑制	喉恶性肿瘤;2型糖尿病性视网膜病变;黄斑囊肿;双眼白内障;慢性乙型病毒性肝炎;肺结节;陈旧性胸椎骨折;颈部淋巴结继发恶性肿瘤;骨继发恶性肿瘤	好转	吴剑	吴剑	218358
952	C06肿瘤放化疗、神经康复	2022-11-14	2022-11-20	3298053	潘顺连	男	81Y	肺恶性肿瘤	肝恶性肿瘤;骨恶性肿瘤;脓毒血症;多发性肋骨骨折;腰椎骨折;骨质疏松;低蛋白血症;前列腺增生;后天性肾囊肿;膀胱结石	好转	吴剑	吴剑	黄选章
953	C06肿瘤放化疗、神经康复	2022-10-12	2022-11-23	3299331	王岩寿	男	42Y	病毒性脑膜炎	肋骨骨折;胆囊结石;高血压病;气管造口状态;急性脊髓炎;由于活动能力降低而需要帮助;特指颈椎间盘变性;肺部感染;泌尿道感染;下肢特指深部脉管静脉炎和血栓性静脉炎	好转	刘宝华	商萍	吕德钊	经外周静脉穿刺中心静脉插管术[PICC];支气管镜检查术
954	C06肿瘤放化疗、神经康复	2022-09-19	2022-12-04	3303450	徐忠忠	女	90Y	脑血管病后遗症	泌尿道感染;肺部感染;2型糖尿病;后天性肾囊肿;肾结石;肝囊肿;颈动脉硬化;双眼白内障;静脉栓塞和血栓形成;增生性牙龈炎;痴呆;骨质疏松伴病理性骨折;股骨粗隆间骨折;运动障碍;特定性运动功能发育障碍;言语障碍;进食障碍;特指癫痫;Ⅱ期褥疮	好转	刘宝华	商萍	覃燕青
955	C06肿瘤放化疗、神经康复	2022-12-03	2022-12-07	3304723	董进花	女	72Y	股骨颈骨折	房性早搏;腰椎退行性病变;腰椎间盘突出;陈旧性尺骨骨折;陈旧性桡骨骨折;膝关节病;慢性乙型病毒性肝炎;肾积水伴肾结石;肾萎缩;颈动脉硬化;锁骨下动脉粥样硬化;脑梗死后遗症;偏瘫;言语障碍;进食障碍;特定性运动功能发育障碍;颈内动脉闭塞	好转	刘宝华	商萍	胡晓晓
956	C06肿瘤放化疗、神经康复	2022-11-16	2022-12-18	3309108	何张红	男	60Y	脑出血	呼吸道结核;前列腺结石;高血压病;肝功能异常;皮疹;下肢动脉粥样硬化;甲状腺囊肿;甲状腺结节;慢性上颌窦炎;肺结节;锁骨骨折	好转	刘宝华	商萍	218316
957	C07泌尿	2025-12-12	2022-01-02	3178191	池少薇	女	64Y	良性脂肪瘤样肿瘤	病理性骨折;骨质疏松;腹膜后肿物	好转	竺海波	虞海峰	陈超豪2	皮下组织病损切除术
958	C07泌尿	2022-01-18	2022-01-28	3187118	滕美红	女	61Y	膀胱结石	神经源性膀胱;骨折治疗后恢复期;后天性肾囊肿;泌尿道感染	治愈	竺海波	虞海峰	陈超豪2	经尿道膀胱镜膀胱激光碎石取石术
959	C07泌尿	2022-01-27	2022-02-03	3189526	夏长钗	女	82Y	肾肿物	输尿管扩张;后天性肾囊肿;耻骨骨折;痴呆;高血压病;肺特指疾患;泌尿道感染	未愈	陈映鹤	陈映鹤	陈映鹤
960	C07泌尿	2022-02-05	2022-02-09	3191893	朱梓榜	男	50Y	肾结石伴输尿管结石	泌尿道感染;肋骨骨折;前列腺钙化灶	治愈	竺海波	虞海峰	虞海峰	经尿道输尿管镜激光碎石取石术(肾盂\输尿管)
961	C07泌尿	2022-02-26	2022-03-05	3199082	陈长敬	男	48Y	肾结石伴输尿管结石	输尿管积水;胸椎骨折	治愈	竺海波	饶大庞	饶大庞	经尿道输尿管镜激光碎石取石术(肾盂\输尿管)
962	C07泌尿	2022-03-09	2022-03-13	3202482	金月凤	女	56Y	肾结石伴输尿管结石	骨折治疗后恢复期;创伤性蛛网膜下腔出血;脑挫伤;创伤性胸腔积液;高血压病	治愈	陈映鹤	南存金	陈超豪2	经尿道输尿管镜激光碎石取石术(肾盂\输尿管)
963	C07泌尿	2022-05-20	2022-05-30	3230462	王尧生	男	59Y	肾挫伤	恶性肿瘤术后恢复期;创伤性肾周血肿;失血性休克;肋骨骨折;肝囊肿	好转	何有华	余凯远	王帅彬	肾动脉栓塞术;肾动脉造影
964	C07泌尿	2022-05-19	2022-06-04	3232270	蔡国招	男	37Y	肾上腺肿瘤	前列腺结石;陈旧性肋骨骨折;室性早搏;库欣综合征;后天性肾囊肿;脂肪肝	治愈	何有华	余凯远	王帅彬	腹腔镜下肾上腺病损切除术
965	C07泌尿	2022-06-19	2022-06-26	3240340	徐崇弟	男	87Y	肾积水伴输尿管结石	股骨粗隆间骨折;泌尿道感染;结肠恶性肿瘤;后天性肾囊肿;胆囊结石;慢性阻塞性肺病;高血压病	治愈	陈映鹤	陈映鹤	陈映鹤	经尿道输尿管镜激光碎石取石术(肾盂\输尿管)
966	C07泌尿	2022-08-06	2022-08-14	3260582	叶树青	男	86Y	膀胱恶性肿瘤	肝囊肿;前列腺增生;脊柱压缩性骨折;后天性肾囊肿	好转	竺海波	竺海波	饶大庞	经尿道膀胱病损电切术
967	C07泌尿	2022-08-09	2022-08-16	3261384	徐岩社	男	76Y	前列腺恶性肿瘤	骨继发恶性肿瘤;腰椎骨折	好转	竺海波	饶大庞	饶大庞	超声引导下前列腺穿刺
968	C07泌尿	2022-08-16	2022-08-24	3264894	董冬妹	女	65Y	肾挫伤	肾包膜下积液;高血压病;桡骨下端骨折	好转	陈映鹤	南存金	陈超豪2	肾动脉造影;肾动脉栓塞术
969	C07泌尿	2022-09-06	2022-09-12	3271908	柯秀兰	女	74Y	肾积水伴输尿管结石	感染性休克;腔隙性脑梗死;脑萎缩;肺部感染;肋骨骨折;胆囊结石伴慢性胆囊炎;脂肪肝;输尿管积水	治愈	何有华	木海琦	王帅彬	经尿道膀胱镜输尿管镜输尿管扩张术
970	C07泌尿	2022-09-06	2022-09-20	3275035	胡文朋	男	52Y	肾结石	取除骨折内固定装置;高血压病	治愈	陈映鹤	陈映鹤	南存金	经皮肾镜取石术;椎骨内固定修正术
971	C07泌尿	2022-09-05	2022-09-22	3276002	钟阳阳	女	32Y	肾上腺良性肿瘤	肱骨下端骨折;皮肤和皮下组织局部感染;高血压病	治愈	竺海波	饶大庞	饶大庞	腹腔镜下单侧肾上腺切除术
972	C07泌尿	2022-09-21	2022-09-26	3277195	杨武辉	男	42Y	肾挫伤	创伤性肾周血肿;后天性肾囊肿;肘关节骨折	好转	张磊	张磊	陈超豪2
973	C07泌尿	2022-10-07	2022-10-12	3282843	黄加魁	男	60Y	前列腺增生	后天性肾囊肿;骨折治疗后恢复期;痛风;脂肪肝;肾结石	治愈	何有华	木海琦	王帅彬
974	C07泌尿	2022-10-17	2022-10-22	3286417	戚艳霞	女	83Y	肾积水伴肾输尿管结石	陈旧性肋骨骨折;脂肪肝;高血压病;2型糖尿病	治愈	何有华	木海琦	王帅彬	经尿道膀胱镜输尿管导管插入术
975	C07泌尿	2022-10-26	2022-10-30	3289936	林宁宁	女	25Y	肾挫伤	肾萎缩;肾结石;肾上腺损伤;肋骨骨折;腰椎骨折	好转	陈映鹤	南存金	南存金
976	C07泌尿	2022-11-15	2022-11-17	3297048	戚艳霞	女	83Y	输尿管结石	泌尿道感染;陈旧性肋骨骨折;脂肪肝;高血压病;2型糖尿病	治愈	何有华	木海琦	王帅彬	经尿道输尿管镜激光碎石取石术(肾盂\输尿管);输尿管导管去除
977	C07泌尿	2022-11-29	2022-12-03	3302980	张菊妹	女	63Y	肾结石伴输尿管结石	输尿管积水;泌尿道感染;腰椎骨折	治愈	何有华	木海琦	王帅彬	经尿道膀胱镜输尿管导管插入术;经尿道输尿管镜激光碎石取石术(肾盂\输尿管)
978	C07泌尿	2022-11-28	2022-12-10	3305676	高强	男	46Y	创伤性肾血肿	肾挫伤;肋骨骨折;前列腺增生;腰椎退行性病变	好转	竺海波	虞海峰	218306
979	C08肛肠科	2022-06-25	2022-07-02	3242839	吴雪连	女	53Y	鹰嘴骨折	后天性肾囊肿;脂肪肝	治愈	余可和	余可和	卢晓郎	尺骨骨折切开复位钢针内固定术
980	C08肛肠科	2022-06-25	2022-07-02	3242845	周爱平	女	52Y	髌骨骨折	膝挫伤	好转	石成弟	胡炜	胡炜	髌骨骨折切开复位螺钉内固定术
981	C08肛肠科	2022-07-02	2022-07-13	3247584	杨宗省	男	43Y	复杂性肛瘘	后天性肾囊肿;陈旧性肋骨骨折	治愈	卢敏	卢敏	卢敏	肛瘘挂线疗法
982	C09肛肠科	2022-01-24	2022-01-27	3187055	李金荣	男	56Y	手术后恶性肿瘤化学治疗	肺恶性肿瘤;髋关节脱位;腰椎间盘突出;骨盆骨折	好转	黄宪平	章岳峰	林志勇
983	C09肛肠科	2022-03-05	2022-03-08	3200446	张泮连	女	60Y	后天性肾囊肿	脂肪肝;甲状腺结节;高血压病;2型糖尿病;骨折治疗后恢复期	治愈	何有华	木海琦	王帅彬	腹腔镜下肾囊肿去顶术
984	C09肛肠科	2022-02-24	2022-03-20	3204747	张凤仙	女	73Y	乙状结肠恶性肿瘤	尺骨桡骨远端骨折;尺桡关节脱位;高血压病	好转	刘长宝	蔡锚	蔡锚	结肠病损切除术
985	C09肛肠科	2022-04-10	2022-04-11	3212777	周昌贵	男	52Y	泪小管断裂	眼睑裂伤;眶骨骨折	治愈	冯旺强	董志章	骆伊丽	泪小管吻合术;内眦成形术;外眦成形术;皮肤和皮下组织非切除性清创
986	C09肛肠科	2022-06-11	2022-07-02	3242670	章兴妹	女	78Y	直肠恶性肿瘤	肾结石;颈动脉硬化;锁骨下动脉粥样硬化;下肢动脉粥样硬化;高血压病;陈旧性胫骨骨折	好转	刘长宝	黄崇杰	黄崇杰	直肠根治术
987	C09肛肠科	2022-07-10	2022-07-17	3249019	黄玉炎	男	55Y	肛瘘	骨盆骨折	治愈	叶云奎	周崇俊	周崇俊	肛瘘切除术
988	C09肛肠科	2022-07-24	2022-08-21	3263553	张巧婵	女	77Y	直肠恶性肿瘤	脊柱压缩性骨折;后天性肾囊肿;肝囊肿;脂肪肝;多发性结肠息肉;肾结石	好转	刘长宝	黄崇杰	黄崇杰	腹腔镜下直肠根治术
989	C09肛肠科	2022-08-31	2022-09-28	3277978	林进宝	男	79Y	直肠恶性肿瘤	前列腺增生;慢性胃炎;骨折治疗后恢复期;下肢动脉粥样硬化;后天性肾囊肿;前列腺结石	好转	刘长宝	黄崇杰	黄崇杰	直肠根治术
990	C09肛肠科	2022-10-26	2022-10-31	3290498	苏国元	男	50Y	尿道结石	尿道狭窄;股骨头无菌性坏死;髋关节病;前列腺钙化灶;手术后恢复期;前臂骨折;创伤性脾破裂	治愈	何有华	木海琦	王帅彬	尿道切开取石术;经尿道膀胱镜膀胱激光碎石术
991	C09肛肠科	2022-10-23	2022-11-07	3293121	陈秀梅	女	70Y	结肠恶性肿瘤	结肠息肉;多发性脑梗死;高血压病;肝囊肿;颈动脉硬化;脑出血后遗症;胆囊息肉;食管炎;慢性胃炎;特指手术后状态;冠状动脉粥样硬化;下肢动脉粥样硬化;腰椎骨折	好转	刘长宝	黄崇杰	黄崇杰	乙状结肠切除术
992	C10感染内科	2025-12-22	2022-01-15	3182685	范松儿	男	75Y	眼球破裂	肺部感染;眼内出血;眶骨骨折	好转	潘陈为	方佩佩2	林秀珍	眼球破裂修补术
993	C10感染内科	2025-12-08	2022-01-17	3183365	赵珠莲	女	74Y	肱骨外科颈骨折	肩袖损伤;细菌性肝脓肿;脓毒血症;心功能不全;急性肾衰竭;麻痹性肠梗阻;人工髋关节;胆囊结石;脂肪肝;精神分裂症;肺炎克雷伯杆菌感染;肺部感染	治愈	诸葛璐	李杰	吴佐罗	肩袖修补术;肱骨骨折闭合复位钢板内固定术;超声引导下经皮肝穿刺胆管引流术
994	C10感染内科	2022-01-08	2022-02-01	3188776	沈兴妹	女	79Y	脓毒血症	肺部感染;急性肾衰竭;中毒性肝炎;骨质疏松伴病理性骨折;高血压病;2型糖尿病;腰骶部脊柱骨折;脂肪肝;胆囊结石;肾结石;高尿酸血症;腰椎骨折;下肢动脉粥样硬化	好转	诸葛璐	李杰	吴佐罗
995	C10感染内科	2022-01-27	2022-02-10	3192137	吴曼雯	女	87Y	肺部感染	胫后动脉狭窄;肺结节;心功能Ⅱ级;心脏瓣膜病;二尖瓣脱垂;特指三尖瓣疾病;心房颤动;冠状动脉粥样硬化性心脏病;高血压病;2型糖尿病;类风湿性关节炎;跖骨骨折;脂肪肝;股骨良性肿瘤;单眼白内障;颈动脉硬化;胫前动脉狭窄;髋关节病	好转	潘陈为	方佩佩2	林秀珍	胸腔闭式引流术
996	C10感染内科	2022-01-30	2022-02-12	3192982	王兰香	女	81Y	肺部感染	肋骨骨折;动脉粥样硬化;冠状动脉粥样硬化性心脏病;肱骨上端骨折;骨折治疗后恢复期;腔隙性脑梗死;老年性脑萎缩;肥厚型梗阻性心肌病;急性冠脉综合征	治愈	潘陈为	方佩佩2	林秀珍
997	C10感染内科	2022-01-31	2022-02-14	3193947	周彩娥	女	66Y	肺部感染	颈动脉硬化;胆囊结石;脂肪肝;恶性肿瘤术后恢复期;骨折治疗后恢复期	好转	诸葛璐	李杰	吴佐罗
998	C10感染内科	2022-02-09	2022-02-14	3194568	曹阿香	女	78Y	脓毒血症	急性支气管炎;2型糖尿病;2型糖尿病性肾病;高血压病;高血压性心脏病;脂肪肝;骨折治疗后恢复期	好转	潘陈为	方佩佩2	林秀珍
999	C10感染内科	2022-01-30	2022-02-21	3195515	林蓉蓉	女	81Y	细菌性肝脓肿	肺部感染;2型糖尿病;颈动脉硬化;下肢静脉血栓形成;胆囊息肉;肾结石;痴呆;股骨骨折后遗症;下肢动脉粥样硬化	好转	诸葛璐	李杰	吴佐罗
1000	C10感染内科	2022-01-25	2022-02-22	3195648	赵珠莲	女	75Y	肺部感染	骨折治疗后恢复期;人工髋关节;陈旧性肋骨骨折;癫痫;精神分裂症;脂肪肝;胆囊结石	好转	诸葛璐	李杰	吴佐罗
1001	C10感染内科	2022-02-15	2022-02-27	3197023	叶鸿文	女	91Y	脓毒血症	高血压病;高血压性心脏病;心功能不全;阵发性心房纤颤;动脉粥样硬化;具有心脏起搏器;腰椎骨折;胆囊结石;后天性肾囊肿	治愈	潘陈为	方佩佩2	林秀珍
1002	C10感染内科	2022-02-14	2022-03-02	3198151	吕琼芳	女	92Y	肺部感染	高血压病;2型糖尿病;骨质疏松;腰椎滑脱;胸椎骨折;腰椎骨折;人工髋关节	治愈	诸葛璐	李杰	吴佐罗
1003	C10感染内科	2022-03-30	2022-04-05	3210857	廖志伦	男	30Y	病毒感染	药物性肝损害;跟骨骨折;脂肪肝	治愈	潘陈为	方佩佩2	林秀珍
1004	C10感染内科	2022-02-14	2022-04-09	3211963	周月槎	男	93Y	病理性骨折	老年性心脏病;腔隙性脑梗死;腰椎骨折;呼吸衰竭;前列腺结石;前列腺增生;肝囊肿;胸腔积液;心力衰竭;低钠血症;低蛋白血症;营养不良;肺结节;动脉粥样硬化;心房颤动;高血压病;单纯性肾囊肿;药物过敏反应	治愈	潘陈为	方佩佩2	林秀珍	腰椎骨折球囊扩张成形术;胸腔闭式引流术
1005	C10感染内科	2022-04-04	2022-04-26	3218049	陈丽芳	女	70Y	肝硬化失代偿期	肾萎缩;二尖瓣及主动脉瓣狭窄伴关闭不全;胆囊结石;原发性甲状腺功能减退症;脾功能亢进;多发性脑梗死;2型糖尿病;帕金森病;耻骨骨折;风湿性心脏病;阵发性心房纤颤;心功能不全;肝性脑病;肠道感染，其他特指的细菌性	好转	潘陈为	方佩佩2	林秀珍
1006	C10感染内科	2022-04-27	2022-05-21	3227291	吕永娒	男	92Y	股骨粗隆间骨折	中毒性肝炎;肺部感染;后天性肾囊肿;脓毒血症;陈旧性肋骨骨折;胆汁淤积性肝炎	治愈	诸葛璐	李杰	吴佐罗	股骨骨折切开复位髓内针内固定术
1007	C10感染内科	2022-05-14	2022-05-24	3228281	周金容	男	54Y	肝炎后肝硬化	肺结节;胆囊结石;后天性肾囊肿;颈部脂肪瘤;陈旧性肋骨骨折;脾大;前列腺结石;肝囊肿;乙型病毒性肝炎	好转	潘陈为	方佩佩2	林秀珍
1008	C10感染内科	2022-04-26	2022-06-06	3233067	曹小云	女	54Y	脓毒血症	乳突炎;肺部感染;脾大;药物和药剂引起全身性皮疹;干燥综合征;脑缺血灶;脊柱压缩性骨折	治愈	潘陈为	潘陈为	林秀珍	唇活检
1009	C10感染内科	2022-06-13	2022-06-18	3237658	潘永德	男	70Y	肋骨骨折	颈动脉硬化;前列腺结石;前列腺增生;肝囊肿;脂肪肝;肺部感染	好转	诸葛璐	吴佐罗	吴佐罗
1010	C10感染内科	2022-06-22	2022-07-05	3244318	林锡共	男	53Y	药物性肝损害	脂肪肝;后天性肾囊肿;陈旧性腰椎骨折;颈动脉硬化	好转	诸葛璐	李杰	吴佐罗
1011	C10感染内科	2022-08-09	2022-08-21	3263429	李臣珠	女	54Y	皮肤和皮下组织局部感染	肝功能异常;高血压病;类风湿性关节炎;跖骨骨折;人工膝关节	好转	潘陈为	方佩佩2	黄珊珊
1012	C10感染内科	2022-08-10	2022-08-22	3264143	陈荣军	男	47Y	创伤性硬膜外血肿	颅内感染;颅内静脉窦血栓形成;短暂性脑缺血发作;顶骨骨折;肝囊肿;肾结石;前列腺增生;肺气肿	好转	潘陈为	方佩佩2	林秀珍	腰椎穿刺
1013	C10感染内科	2022-08-05	2022-08-24	3264886	夏育兰	女	78Y	慢性阻塞性肺病伴急性加重	肺部感染;肺气肿;心包积液;高血压病;颈动脉硬化;下肢动脉粥样硬化;骨质疏松;肝囊肿;陈旧性肋骨骨折	好转	潘陈为	方佩佩2	黄珊珊
1014	C10感染内科	2022-08-01	2022-08-30	3266970	刁霞	女	50Y	成人斯蒂尔病	脓毒血症;中毒性肝炎;轻度贫血;糜烂性胃炎;低蛋白血症;特指趾骨骨折	好转	潘陈为	方佩佩2	黄珊珊	骨髓穿刺术（骨穿）
1015	C10感染内科	2022-08-19	2022-09-05	3269343	王阿翠	女	86Y	脓毒血症	心功能不全;高血压性心脏病;肾衰竭;多发性肋骨骨折;动脉粥样硬化;下肢静脉血栓形成;2型糖尿病;胆囊结石;后天性肾囊肿;神经官能症	好转	诸葛璐	李杰	吴佐罗
1016	C10感染内科	2022-09-12	2022-09-22	3275877	刘丽芸	女	68Y	肝硬化失代偿期	腹水;脾大;创伤性蛛网膜下腔出血;肋骨骨折;双踝骨折;2型糖尿病	好转	潘陈为	方佩佩2	黄珊珊
1017	C10感染内科	2022-08-30	2022-10-08	3281299	陈月香	女	53Y	腰椎骨折	颅内感染;泌尿道感染;肾结石;肾错构瘤;下肢动脉粥样硬化;脑脊液漏;粒细胞缺乏;2型糖尿病;药物性发热	好转	诸葛璐	李杰	吴佐罗	椎管减压术
1018	C10感染内科	2022-10-08	2022-10-17	3284810	邹伟	男	27Y	慢性乙型病毒性肝炎	输尿管结石;特指肾盂积水;骨折治疗后恢复期	好转	诸葛璐	李杰	吴佐罗
1019	C10感染内科	2022-10-30	2022-11-08	3293639	周爱珠	女	64Y	脓毒血症	2型糖尿病;胸椎骨折;腰椎退行性病变;腰椎间盘突出;脂肪肝;老年性心脏病;下肢动脉粥样硬化	治愈	潘陈为	方佩佩2	黄珊珊
1020	C10感染内科	2022-11-14	2022-11-16	3296870	郑祥胜	男	76Y	肺恶性肿瘤	纵隔淋巴结继发恶性肿瘤;锁骨上淋巴结继发恶性肿瘤;胸腔积液;心包积液;慢性阻塞性肺病;2型糖尿病;陈旧性肺结核;肺结节;肝囊肿;前列腺增生;陈旧性肋骨骨折;高血压病	未愈	诸葛璐	李杰	吴佐罗
1021	C10感染内科	2022-11-06	2022-12-01	3302304	钱昭旺	男	68Y	颅内感染	肺气肿;肺部感染;胸腔积液;低蛋白血症;躯干皮肤脓肿、疖和痈;肺大泡;陈旧性肋骨骨折;胆囊结石;后天性肾囊肿	治愈	潘陈为	方佩佩2	黄珊珊	膀胱镜检查;经皮耻骨上膀胱造口导尿管插入术;腰椎穿刺
1022	C10感染内科	2022-11-22	2022-12-03	3302809	李蓉晓	女	66Y	皮肤和皮下组织局部感染	泌尿道感染;脑萎缩;骨折治疗后恢复期	治愈	潘陈为	方佩佩2	黄珊珊
1023	C10感染内科	2022-12-04	2022-12-28	3312738	金忠良	男	85Y	重症肺炎	间质性肺病;呼吸衰竭;胸椎骨折;脑梗死后遗症;慢性阻塞性肺病;肺动脉高压中度;陈旧性肺结核;肝囊肿	好转	潘陈为	方佩佩2	黄珊珊
1024	C11肾内科	2025-12-27	2022-01-03	3178531	李加明	男	52Y	腹膜透析后腹膜炎	冠状动脉粥样硬化性心脏病;肾结石;前列腺结石;前列腺增生;腓骨骨折;特指手术后状态;颈动脉硬化;肝钙化灶;后天性肾囊肿;2型糖尿病性肾病;2型糖尿病性视网膜病变;特指糖尿病伴神经并发症;高血压病;腹膜透析	好转	郑育	黄文	黄文
1025	C11肾内科	2025-12-19	2022-01-09	3180758	郭金妹	女	70Y	胸椎骨折	骨质疏松;肋骨骨折;原发性双侧膝关节病;腰椎退行性病变;腰椎间盘突出;下肢动脉粥样硬化;帕金森病;高血压病;脂肪肝	好转	张益前	张益前	张益前
1026	C11肾内科	2025-12-15	2022-01-15	3182874	王美英	女	74Y	高血压性肾衰竭	肾萎缩;肝钙化灶;膀胱结石;肺部感染;脑梗死后遗症;甲状腺机能减退症;败血症;肠梗阻;血液透析;痛风;骨质疏松;腰椎骨折	好转	毛朝鸣	赵艳玲	潘殊方	血液透析
1027	C11肾内科	2022-01-11	2022-01-16	3182898	陈玉英	女	61Y	骨质疏松伴病理性骨折	胸椎骨折;2型糖尿病;高脂血症;手术随诊医疗;乳腺良性肿瘤;甲状腺结节;胆囊息肉;脂肪肝	好转	王红	王红	金怡
1028	C11肾内科	2022-01-15	2022-01-16	3183009	王美英	女	75Y	高血压性肾衰竭	脑梗死后遗症;甲状腺机能减退症;痛风;骨质疏松;腰椎骨折;血液透析;肠梗阻;败血症	好转	毛朝鸣	赵艳玲	潘殊方	血液透析
1029	C11肾内科	2022-01-14	2022-01-16	3183272	丁萍	女	52Y	混合性结缔组织病	间质性肺病;特指手术后状态;陈旧性桡骨骨折	好转	周志宏	张益前	张益前
1030	C11肾内科	2022-01-14	2022-01-17	3183434	周春凤	女	67Y	干燥综合征	肾错构瘤;主动脉钙化;高血压病;泌尿道感染;急性上呼吸道感染;颈动脉硬化;腔隙性脑梗死;颞颌关节综合征;骨质疏松;胸椎骨折;脊椎退行性病变;多浆膜腔积液;颈椎间盘突出;心律失常;房性早搏;室性早搏;Ⅰ度房室传导阻滞	好转	王红	王红	金怡
1031	C11肾内科	2022-01-10	2022-01-22	3184881	胡珠香	女	83Y	干燥综合征	间质性肺病;肺部感染;慢性支气管炎伴肺气肿;肺大泡;骨质疏松;胸椎骨折;脊柱变性;高血压病;下肢动脉粥样硬化;完全性右束支传导阻滞;具有心脏起搏器;食管裂孔疝	好转	王红	王红	金怡	口腔黏膜病损切除术
1032	C11肾内科	2022-01-17	2022-01-23	3185302	黄明忠	男	68Y	慢性肾脏病4期	肾病综合征，膜性肾病;2型糖尿病性视网膜病变;自身免疫病;高血压病;颈动脉硬化;带状疱疹累及特指神经系统;肺大泡;主动脉钙化;特指手术后状态;下肢动脉粥样硬化;骨折治疗后恢复期;胸膜肥厚;肺部感染	好转	郑育	郑育	徐晓燕2
1033	C11肾内科	2022-01-26	2022-02-06	3190354	汤光曼	男	71Y	骨质疏松伴病理性骨折	风湿性多肌痛;全身性骨关节炎;脊柱侧弯;病毒性肝炎病原携带者;脂肪肝;前列腺增生	好转	周志宏	张益前	张益前
1034	C11肾内科	2022-01-31	2022-02-07	3190784	汪希秒	男	52Y	痛风性关节炎	酒精性肝病;颈动脉硬化;胸椎间盘突出;陈旧性肋骨骨折;前列腺结石;心动过缓;锁骨下动脉粥样硬化;腰椎间盘突出	好转	王红	王红	金怡
1035	C11肾内科	2022-01-16	2022-02-12	3192925	王美英	女	75Y	高血压性肾衰竭	血液透析;肠梗阻;败血症;腰椎骨折;甲状腺机能减退症;痛风;骨质疏松;脑梗死后遗症	好转	毛朝鸣	郑淑蓓	潘殊方	血液透析
1036	C11肾内科	2022-02-10	2022-02-26	3196802	潘洪聪	男	65Y	2型糖尿病性肾病	慢性肾脏病5期;血液透析;2型糖尿病性周围神经病;导管相关性感染;肺部感染;胆囊结石;胆囊炎;肾结石;后天性肾囊肿;酒精性肝纤维化和肝硬化;脾大;高血压性心脏病;腔隙性脑梗死;陈旧性股骨骨折;2型糖尿病性周围血管病变	好转	赵艳玲	郑淑蓓	潘殊方	血液透析
1037	C11肾内科	2022-02-15	2022-03-05	3199145	陈选翼	男	56Y	慢性肾脏病4期	肾病综合征;高尿酸血症;肾结石;肺结节;脂肪肝;前列腺结石;腰椎退行性病变;腰椎间盘突出;韧带钙化;颈椎椎管狭窄;2型糖尿病性肾病;2型糖尿病性视网膜病变;2型糖尿病性周围神经病;高血压病;高脂血症;下肢动脉粥样硬化;骨折治疗后恢复期	好转	戴彩香	戴彩香	戴彩香
1038	C11肾内科	2022-02-16	2022-03-08	3200442	张树令	女	86Y	慢性肾脏病5期	双眼白内障;下肢静脉血栓形成;下肢动脉粥样硬化;颈动脉硬化;肋骨骨折;骨质疏松;肝硬化失代偿期;轻度贫血;肾性高血压;2型糖尿病性肾病	好转	赵艳玲	陈辉乐	徐晓燕2
1039	C11肾内科	2022-03-05	2022-03-14	3202530	陈友琦	男	59Y	2型糖尿病性肾病	腹膜透析;慢性肾脏病5期;心功能Ⅲ级;肺部感染;高血压病;中度贫血;胆囊结石;肾结石;后天性肾囊肿;腹水;下肢动脉粥样硬化;颈动脉硬化;肋骨骨折	好转	戴彩香	戴彩香	戴彩香	腹膜透析
1040	C11肾内科	2022-03-12	2022-03-22	3205542	侯定兴	男	72Y	支气管扩张伴感染	Ⅰ度房室传导阻滞;2型糖尿病性肾病;腹膜透析;胆总管结石;肋骨骨折;后天性肾囊肿	好转	毛朝鸣	叶菡洋	黄文
1041	C11肾内科	2022-03-02	2022-03-23	3206223	陈益女	女	79Y	类风湿性关节炎	间质性肺病;肺部感染;骨质疏松;脂肪肝;肝囊肿;后天性肾囊肿;陈旧性肋骨骨折;动脉粥样硬化;静脉栓塞和血栓形成;双眼白内障;黄斑玻璃样疣	好转	周志宏	张益前	金怡
1042	C11肾内科	2022-02-22	2022-03-29	3208179	叶花妹	女	71Y	肾病综合征	肾衰竭;胸椎骨折;胸椎退行性病变;腰椎退行性病变;消化道出血;下肢静脉血栓形成;高血压病;骨质疏松;肾结石;颈动脉硬化;下肢动脉粥样硬化;糜烂性胃炎	好转	赵艳玲	陈辉乐	徐晓燕2	胸椎骨折球囊扩张成形术
1043	C11肾内科	2022-03-29	2022-04-02	3209322	丁萍	女	52Y	混合性结缔组织病	特指手术后状态;间质性肺病;心动过缓;陈旧性桡骨骨折	好转	周志宏	张益前	廖秋眉
1044	C11肾内科	2022-03-14	2022-04-02	3209602	黄龙平	男	48Y	肺部感染	结肠恶性肿瘤;特指手术后状态;膀胱肿瘤;继发性甲状旁腺功能亢进症;马兜铃酸肾病;慢性肾脏病5期;骨折治疗后恢复期	好转	毛朝鸣	叶菡洋	黄文
1045	C11肾内科	2022-03-28	2022-04-10	3212205	张树令	女	86Y	2型糖尿病性肾病	血液透析;高血压性心脏病;颈动脉硬化;下肢动脉粥样硬化;肝硬化失代偿期;后天性肾囊肿;肾结石;轻度贫血;双眼白内障;肋骨骨折;腹水;骨质疏松;肺部感染;胸腔积液;下肢静脉血栓形成;肾性高血压;肺结节	好转	毛朝鸣	叶菡洋	黄文
1046	C11肾内科	2022-04-13	2022-04-18	3215145	周春凤	女	68Y	干燥综合征	急性上呼吸道感染;胸椎骨折;肾错构瘤;骨质疏松;室性早搏;腔隙性脑梗死;高血压病;Ⅰ度房室传导阻滞;主动脉钙化;颈动脉硬化;脊椎退行性病变;心律失常	好转	周志宏	张益前	张益前
1047	C11肾内科	2022-04-16	2022-04-19	3215454	王庆富	男	58Y	高血压性心脏病肾脏病伴心力衰竭和肾功能衰竭	慢性肾脏病5期;陈旧性肋骨骨折;冠状动脉粥样硬化性心脏病;血液透析;后天性肾囊肿;肾结石	好转	赵艳玲	陈辉乐	徐晓燕2	血液透析;为肾透析的动静脉造瘘术
1048	C11肾内科	2022-04-26	2022-04-28	3218952	林鹤群	男	49Y	2型糖尿病性肾病	骨折治疗后恢复期;缺血性肠病;高血压病;肩周炎;下肢动脉粥样硬化;颈动脉硬化;颈椎间盘突出;脂肪肝;前列腺增生;肺结核瘤;慢性乙型病毒性肝炎;2型糖尿病性视网膜病变;2型糖尿病性周围神经病;2型糖尿病性周围循环并发症;慢性肾脏病3期	好转	赵艳玲	陈辉乐	徐晓燕2
1049	C11肾内科	2022-04-19	2022-05-02	3220122	廖永生	男	79Y	2型糖尿病性肾病	胸腔积液;脾大;陈旧性肋骨骨折;特指手术后状态;腹腔血管瘤;慢性肾脏病4期;后天性肾囊肿;高血压病;颈动脉硬化;胆囊结石	好转	赵艳玲	陈辉乐	徐晓燕2	胸腔闭式引流术
1050	C11肾内科	2022-04-18	2022-05-03	3220563	王美英	女	75Y	脓毒血症	痛风;骨质疏松;继发性甲状腺功能减退症;高血压性肾衰竭;脑血管病后遗症;血液透析;脊柱压缩性骨折	治愈	赵艳玲	陈辉乐	徐晓燕2	血液透析
1051	C11肾内科	2022-05-04	2022-05-07	3222110	丁萍	女	53Y	混合性结缔组织病	心动过缓;陈旧性桡骨骨折;胆囊切除术后状态;间质性肺病	好转	周志宏	张益前	廖秋眉
1052	C11肾内科	2022-04-10	2022-05-13	3224153	陈少春	女	64Y	2型糖尿病性肾病	肾病综合征;多浆膜腔积液;肺部感染;高血压性心脏病;癫痫;甲状腺结节;动脉粥样硬化;感音神经性耳聋;泪道阻塞;代谢性脑病;人工髋关节;慢性肾脏病5期;2型糖尿病性视网膜病变;多发性脑梗死;轻度贫血;股骨颈骨折;昏迷;泌尿道感染	好转	周志宏	张益前	金怡
1053	C11肾内科	2022-05-02	2022-05-16	3225356	侯定兴	男	72Y	2型糖尿病性肾病	Ⅰ度房室传导阻滞;支气管扩张伴感染;冠状动脉粥样硬化;陈旧性肋骨骨折;后天性肾囊肿	好转	毛朝鸣	黄文	黄文
1054	C11肾内科	2022-05-07	2022-05-16	3225474	王庆富	男	58Y	导管相关性感染	慢性肾小球肾炎;后天性肾囊肿;高血压性心脏病;慢性肾脏病5期;肋骨骨折;肾结石	治愈	赵艳玲	陈辉乐	徐晓燕2	血液透析
1055	C11肾内科	2022-05-16	2022-05-23	3225585	戴建华	男	67Y	2型糖尿病	颈动脉硬化;胆囊胆固醇沉着症;高血压心脏病伴心力衰竭;肋骨骨折;前列腺结石;脂肪肝	好转	毛朝鸣	黄文	黄文
1056	C11肾内科	2022-04-26	2022-05-25	3229027	胡顺清	男	63Y	2型糖尿病性肾病	半月板损伤;原发性单侧膝关节病;肾结石;慢性肾脏病5期;特指手术后状态;肺部感染;高钾血症;代谢性酸中毒;血液透析;单眼白内障（右）;颈动脉硬化;下肢动脉粥样硬化;胫骨上端骨折;膝关节滑膜炎	好转	周志宏	张益前	张益前	颈内静脉穿刺中心静脉置管术;为肾透析的动静脉造瘘术
1057	C11肾内科	2022-05-21	2022-05-28	3229561	林鹤群	男	49Y	2型糖尿病性肾病	脂肪肝;前列腺增生;肺结核瘤;慢性乙型病毒性肝炎;2型糖尿病性视网膜病变;2型糖尿病性周围神经病;2型糖尿病性周围循环并发症;慢性肾脏病3期;骨折治疗后恢复期;肠急性血管疾患;颈椎间盘突出;颈动脉硬化;下肢动脉粥样硬化;肩周炎;高血压病	好转	赵艳玲	陈辉乐	徐晓燕2
1058	C11肾内科	2022-05-10	2022-06-07	3233718	徐玉燕	女	72Y	腹股沟淋巴结肿大	多发性肋骨骨折;下肢动脉粥样硬化;重度贫血;心动过速;骨质疏松;颈椎关节强硬;卵巢囊肿;脂肪肝;低蛋白血症;肩撞击综合征	好转	李占园	叶菡洋	叶菡洋
1059	C11肾内科	2022-06-05	2022-06-07	3233735	丁萍	女	53Y	混合性结缔组织病	陈旧性桡骨骨折;心动过缓;间质性肺病;特指手术后状态	好转	毛朝鸣	王红	金怡
1060	C11肾内科	2022-06-08	2022-06-12	3235289	周莲凤	女	80Y	高血压性肾衰竭	颈动脉硬化;下肢动脉粥样硬化;腔隙性脑梗死;2型糖尿病;胸椎骨折;高尿酸血症;骨质疏松;泌尿道感染;脂肪肝;高脂血症	好转	戴彩香	戴彩香	戴彩香
1061	C11肾内科	2022-06-05	2022-06-19	3237932	卢爱岳	女	47Y	系统性红斑狼疮	妊娠、分娩和产褥期并发症个人史;骨折治疗后恢复期;间质性肺病;骨质疏松;肝功能不全;陈旧性肺结核	好转	毛朝鸣	王红	廖秋眉
1062	C11肾内科	2022-06-14	2022-06-20	3238301	王美珠	女	73Y	慢性肾脏病5期	脑梗死后遗症;高血压病;2型糖尿病;腰椎骨折;冠状动脉粥样硬化性心脏病;血液透析;后天性肾囊肿;下肢动脉粥样硬化	治愈	郑育	陈辉乐	徐晓燕2	血液透析
1063	C11肾内科	2022-06-11	2022-06-22	3239027	诸培中	男	61Y	慢性间质性肾炎	慢性肾脏病5期;膝关节积液;颈动脉硬化;下肢动脉粥样硬化;高血压病;急性丙型病毒性肝炎;移植肾功能不全;冠状动脉粥样硬化性心脏病;冠状动脉痉挛;骨折治疗后恢复期	好转	李占园	叶菡洋	叶菡洋
1064	C11肾内科	2022-06-14	2022-06-25	3239889	廖永生	男	79Y	2型糖尿病性肾病	后天性肾囊肿;慢性肾脏病4期;胆囊结石;动脉粥样硬化;心房颤动;完全性右束支传导阻滞;高血压病;腹腔血管瘤;肋骨骨折;脾大;肾病综合征;胸腔积液;特指手术后状态	好转	郑育	陈辉乐	徐晓燕2
1065	C11肾内科	2022-06-26	2022-06-27	3240991	侯定兴	男	72Y	2型糖尿病性肾病	支气管扩张;陈旧性肋骨骨折;腹膜透析;Ⅰ度房室传导阻滞;主动脉粥样硬化;慢性肾脏病5期;后天性肾囊肿;特指手术后状态	好转	李占园	黄文	黄文
1066	C11肾内科	2022-06-22	2022-07-06	3244530	许秀英	女	76Y	高血压性心脏病肾脏病伴肾功能衰竭	颈动脉硬化;肋骨骨折;子宫平滑肌瘤;后天性肾囊肿;老年性脑变性	好转	毛朝鸣	王红	廖秋眉
1067	C11肾内科	2022-07-05	2022-07-13	3247479	叶正湛	男	69Y	高血压性心脏病及肾脏病	跖骨骨折;颈动脉硬化;肺大泡;脂肪肝;后天性肾囊肿;肾结石;糜烂性胃炎;小肠息肉;锁骨下动脉粥样硬化;下肢动脉粥样硬化;高血压性视网膜病变;2型糖尿病	好转	郑育	陈辉乐	徐晓燕2
1068	C11肾内科	2022-07-06	2022-07-23	3251399	邹玉叶	女	86Y	风湿性多肌痛	骨质疏松;胸椎骨折;退行性脊柱炎;泌尿道感染;高血压病;颈动脉硬化;食管裂孔疝;肝囊肿;胆囊结石;肺结节;老年性脑萎缩;锁骨下动脉粥样硬化;下肢动脉粥样硬化	好转	毛朝鸣	王红	廖秋眉
1069	C11肾内科	2022-07-18	2022-07-23	3251850	叶花妹	女	71Y	肾病综合征	慢性肾衰竭;急性肾衰竭;心功能不全;感染性休克;肺部感染;泌尿道感染;高血压病;骨质疏松;颈动脉硬化;下肢动脉粥样硬化;下肢静脉血栓形成;骨折治疗后恢复期;胸椎退行性病变;腰椎退行性病变;糜烂性胃炎;肾结石;老年性脑萎缩;脑梗死后遗症	未愈	毛朝鸣	王红	金怡
1070	C11肾内科	2022-07-20	2022-07-25	3252362	麻林菊	女	61Y	骨质疏松	高血压病;乙型病毒性肝炎;特指手术后状态;骨折治疗后恢复期;脊柱侧弯;脊椎退行性病变;亚临床甲状腺功能亢进症;肾结石;后天性肾囊肿;胆囊结石;下肢静脉血栓形成;脂肪肝;高血压性心脏病	好转	毛朝鸣	王红	金怡
1071	C11肾内科	2022-07-17	2022-07-26	3252780	李玉生	男	47Y	IgA肾病，局灶和节段性肾小球损害	高血压病;2型糖尿病;慢性乙型病毒性肝炎;胆囊切除术后状态;脂肪肝;肋骨骨折;肾炎综合症	好转	郑育	陈辉乐	徐晓燕2	肾穿刺活体组织检查术（肾穿）
1072	C11肾内科	2022-07-27	2022-07-28	3254106	侯定兴	男	72Y	2型糖尿病性肾病	后天性肾囊肿;冠状动脉粥样硬化;主动脉粥样硬化;Ⅰ度房室传导阻滞;陈旧性肋骨骨折;支气管扩张;腹膜透析;慢性肾脏病5期	好转	李占园	叶菡洋	黄文
1073	C11肾内科	2022-07-24	2022-08-01	3255324	陈先旺	男	37Y	IgA肾病	慢性肾脏病2期;骨折治疗后恢复期;高血压病	治愈	郑育	陈辉乐	徐晓燕2	肾穿刺活体组织检查术（肾穿）
1074	C11肾内科	2022-07-31	2022-08-07	3257814	汤凤蕊	女	77Y	类风湿性关节炎	骨质疏松;高血压病;白内障术后(大泡性无晶状体的)角膜病变;胆囊结石伴慢性胆囊炎;支气管扩张;肾结石;肋骨骨折;颈动脉硬化;脊椎退行性病变;后天性肾囊肿	好转	毛朝鸣	王红	庄芝芝
1075	C11肾内科	2022-08-01	2022-08-08	3258226	黄文预	男	40Y	IgA肾病	慢性肾脏病2期;高血压性心脏病;脂肪肝;肝囊肿;胆囊息肉;后天性肾囊肿;肾结石;肋骨骨折;胆囊结石	好转	郑育	陈辉乐	徐晓燕2	肾穿刺活体组织检查术（肾穿）
1076	C11肾内科	2022-07-26	2022-08-14	3260623	张树令	女	87Y	2型糖尿病性肾病	肾性高血压;心房颤动;肺部感染;肝硬化失代偿期;腹水;颈动脉硬化;下肢动脉粥样硬化;肺结节;骨质疏松;双眼白内障;肋骨骨折	好转	郑育	陈辉乐	徐晓燕2	深静脉穿刺;血液净化
1077	C11肾内科	2022-08-09	2022-08-15	3260956	廖永生	男	80Y	2型糖尿病性肾病	慢性肾脏病4期;高血压病;心房颤动;完全性右束支传导阻滞;颈动脉硬化;下肢动脉粥样硬化;胆囊结石;脾大;腹腔血管瘤;后天性肾囊肿;陈旧性肋骨骨折;特指手术后状态	好转	郑育	陈辉乐	徐晓燕2
1078	C11肾内科	2022-08-09	2022-08-16	3261377	黄爱华	女	63Y	干燥综合征	后天性肾囊肿;肝囊肿;原发性甲状腺功能减退症;骨折治疗后恢复期	好转	毛朝鸣	王红	庄芝芝	唇活检
1079	C11肾内科	2022-07-25	2022-08-21	3255692	吕孔友	男	63Y	肾病综合征，肾小球轻微病变	骨折内固定术后疼痛;原发性肺动脉高压;前列腺结石;脂肪肝;锁骨下动脉粥样硬化;颈动脉闭塞和狭窄;颈动脉硬化;高血压性视网膜病变;急性肾衰竭;肺部感染;高血压性心脏病	好转	毛朝鸣	王红	金怡
1080	C11肾内科	2022-08-14	2022-08-23	3264225	陈后志	男	55Y	肾病综合征	肾衰竭;脂肪肝;前列腺增生;心动过缓;骨折治疗后恢复期;系膜增生性IgA肾病	好转	毛朝鸣	王红	金怡	肾穿刺活体组织检查术（肾穿）
1081	C11肾内科	2022-08-08	2022-08-23	3264229	郑文翠	女	86Y	导管相关性感染	慢性肾小球肾炎;慢性肾脏病5期;带状疱疹;后天性肾囊肿;肾萎缩;痛风;高血压性心脏病;房性早搏;下肢动脉粥样硬化;下肢动脉硬化闭塞症;股骨颈骨折;腰椎骨折;腰椎退行性病变	好转	毛朝鸣	王红	金怡
1082	C11肾内科	2022-08-17	2022-08-24	3264697	朱清周	男	59Y	慢性间质性肾炎	腰椎骨折;椎管狭窄;腰椎间盘突出;骨质增生;肾动脉硬化;胆囊结石;慢性肾脏病2期;肋骨骨折	好转	李占园	叶菡洋	黄文
1083	C11肾内科	2022-08-28	2022-08-29	3266739	侯定兴	男	72Y	2型糖尿病性肾病	后天性肾囊肿;陈旧性肋骨骨折;Ⅰ度房室传导阻滞;冠状动脉粥样硬化;胆总管结石;慢性肾脏病5期;细支气管扩张	好转	李占园	叶菡洋	黄文
1084	C11肾内科	2022-09-01	2022-09-04	3268959	吴彩连	女	69Y	骨质疏松伴病理性骨折	肺结节;腰椎骨折;颈动脉硬化;下肢动脉粥样硬化;锁骨下动脉粥样硬化	好转	毛朝鸣	王红	金怡
1085	C11肾内科	2022-09-03	2022-09-07	3270299	吕德俊	男	34Y	强直性脊柱炎	骨质疏松;胸椎骨折;脊柱压缩性骨折;颈椎间盘突出;高血压病;左室肥大	好转	周志宏	张益前	廖秋眉
1086	C11肾内科	2022-08-27	2022-09-17	3273615	郑文翠	女	86Y	导管相关性感染	血液透析;轻度贫血;肝功能异常;股骨颈骨折;高血压性心脏病;闭塞性周围动脉粥样硬化;腰椎骨折;房性早搏;慢性肾小球肾炎;后天性肾囊肿;痛风;慢性肾脏病5期	好转	郑育	徐晓燕2	黄文文	血液透析
1087	C11肾内科	2022-09-21	2022-09-25	3275992	杨妹兰	女	83Y	骨质疏松伴病理性骨折	脊柱压缩性骨折;肾衰竭;高血压病;特指手术后状态	好转	王红	王红	金怡
1088	C11肾内科	2022-09-06	2022-10-08	3281353	王美英	女	75Y	脓毒血症	骨质疏松伴病理性骨折;腰椎骨折;痛风;甲状腺机能减退症;脑血管病后遗症;高血压病;慢性肾脏病5期;高血压性肾衰竭;血液透析	好转	赵艳玲	黄文	黄文	血液透析
1089	C11肾内科	2022-09-27	2022-10-09	3281459	周春凤	女	68Y	干燥综合征	骨质疏松;骨质疏松伴病理性骨折;脊椎退行性病变;高血压病;腔隙性脑梗死;心律失常;房性早搏;室性早搏;Ⅰ度房室传导阻滞;主动脉钙化;肺部感染;肾错构瘤;原发性肺动脉高压;颈动脉硬化;胆囊结石;下肢静脉曲张;胸椎骨折	好转	王红	王红	金怡
1090	C11肾内科	2022-09-28	2022-10-11	3282391	郑文翠	女	86Y	导管相关性感染	轻度贫血;肝功能异常;股骨颈骨折;后天性肾囊肿;痛风;高血压性心脏病;房性早搏;下肢动脉粥样硬化;腰椎骨折;腰椎退行性病变;胫前动脉狭窄;血液透析;慢性肾脏病5期;慢性肾小球肾炎	好转	郑淑蓓	赵艳玲	赵艳玲
1091	C11肾内科	2022-10-11	2022-10-12	3282796	吕德俊	男	34Y	强直性脊柱炎	骨质疏松;胸椎骨折;脊柱压缩性骨折;颈椎间盘突出;高血压病;左室肥大	好转	周志宏	张益前	廖秋眉
1092	C11肾内科	2022-10-15	2022-10-22	3286424	陈友琦	男	60Y	2型糖尿病性肾病	胆囊结石;肾结石;后天性肾囊肿;腹水;下肢动脉粥样硬化;颈动脉硬化;陈旧性肋骨骨折;腹膜透析;间质性肺病;慢性肾脏病5期;心功能Ⅲ级;肺部感染;2型糖尿病;中度贫血;高血压病	好转	戴彩香	戴彩香	戴彩香	腹膜透析
1093	C11肾内科	2022-10-18	2022-10-22	3286460	林鹤群	男	49Y	2型糖尿病性肾病	前列腺结石;肠急性血管疾患;肩周炎;骨折治疗后恢复期;肺结核瘤;颈动脉硬化;下肢动脉粥样硬化;脂肪肝;慢性肾脏病3期;2型糖尿病性视网膜病变;2型糖尿病性周围神经病;2型糖尿病性周围血管病变;2型糖尿病性周围循环并发症;高血压病	好转	赵艳玲	黄文	黄文
1094	C11肾内科	2022-10-15	2022-10-23	3287271	王美珠	女	73Y	慢性肾脏病5期	血液透析;高血压病;2型糖尿病;冠状动脉粥样硬化性心脏病;脑梗死后遗症;腰椎骨折;上肢动脉粥样硬化;后天性肾囊肿;脂肪肝;静脉受压	好转	郑育	徐晓燕2	黄文文	上肢静脉球囊扩张成形术
1095	C11肾内科	2022-10-13	2022-11-05	3292023	叶秀莲	女	84Y	泌尿道感染	盆腔肿物;宫颈囊肿;结肠息肉;肝囊肿;颈动脉硬化;下肢动脉粥样硬化;闭塞性周围动脉粥样硬化;腰椎骨折;脂肪肝;急性肾衰竭;2型糖尿病;2型糖尿病性视网膜病变;高血压性心脏病;高血压性视网膜病变	治愈	王红	王红	金怡
1096	C11肾内科	2022-11-08	2022-11-09	3294104	周春凤	女	68Y	干燥综合征	骨质疏松伴病理性骨折;胸椎骨折;脊椎退行性病变;高血压病;腔隙性脑梗死;心律失常;房性早搏;室性早搏;Ⅰ度房室传导阻滞;主动脉钙化;肾错构瘤;原发性肺动脉高压;颈动脉硬化;胆囊结石;下肢静脉曲张	好转	王红	王红	金怡
1097	C11肾内科	2022-11-09	2022-11-10	3294487	高艳	女	51Y	强直性脊柱炎	人工髋关节;手术随诊医疗;后天性肾囊肿;陈旧性肺结核;陈旧性肋骨骨折	好转	周志宏	张益前	廖秋眉
1098	C11肾内科	2022-11-14	2022-11-16	3296673	滕世金	女	76Y	类风湿性关节炎	骨质疏松伴病理性骨折;胸椎骨折;高血压病;下肢动脉粥样硬化;胆囊结石	好转	王红	王红	金怡
1099	C11肾内科	2022-11-09	2022-11-20	3298010	季定兰	女	63Y	高血压性心脏病肾脏病伴肾功能衰竭	2型糖尿病;后天性肾囊肿;肾占位性病变;慢性胃炎;十二指肠球炎;左室流出道狭窄;室性早搏;颈动脉硬化;下肢动脉粥样硬化;高尿酸血症;特指手术后状态;腔隙性脑梗死;肋骨骨折;癫痫;亚临床甲状腺功能减退症	好转	王红	王红	金怡	胃镜检查
1100	C11肾内科	2022-11-12	2022-11-22	3299062	胡淑眉	女	97Y	2型糖尿病性肾病	下肢动脉粥样硬化;老年性骨质疏松;颈动脉硬化;泌尿道感染;肺部感染;2型糖尿病;高血压病;后天性肾囊肿;肾结石;股骨骨折;痛风性关节炎;房性早搏	好转	戴彩香	戴彩香	戴彩香
1101	C11肾内科	2022-11-20	2022-11-26	3300410	林鹤群	男	50Y	2型糖尿病性肾病	肺结核瘤;颈动脉硬化;下肢动脉粥样硬化;脂肪肝;前列腺结石;肠急性血管疾患;肩周炎;骨折治疗后恢复期;2型糖尿病性视网膜病变;2型糖尿病性周围神经病;2型糖尿病性周围血管病变;2型糖尿病性周围循环并发症;高血压病;颈椎间盘突出	好转	赵艳玲	黄文	黄文
1102	C11肾内科	2022-11-30	2022-12-04	3303399	郭秋香	女	64Y	系统性红斑狼疮	骨质疏松伴病理性骨折;脊柱压缩性骨折;颈动脉硬化;甲状腺结节;耻骨骨折;高血压病	好转	王红	王红	金怡
1103	C11肾内科	2022-12-17	2022-12-18	3308842	汤凤蕊	女	78Y	类风湿性关节炎	骨质疏松;高血压病;单眼白内障;慢性胆囊炎;胆囊结石;后天性肾囊肿;肾结石;肋骨骨折;下肢动脉粥样硬化;下肢动脉狭窄	好转	王红	王红	金怡
1104	D06(ICU)	2025-12-26	2022-01-05	3179545	张月绿	女	85Y	创伤性肝破裂	鼻损伤;脾特指疾病;多发性肋骨骨折;锁骨骨折;后天性脾缺失;后天性消化道特指部分缺失;创伤性血气胸;肺部感染;呼吸衰竭;肺挫伤;创伤性休克;创伤性脾破裂;贫血;下肢皮肤感染;多处挫伤;高血压病;肺气肿;下肢动脉粥样硬化;额骨骨折;眶骨骨折	好转	程碧环	王本极	王本极	胸腔闭式引流术;有创呼吸机治疗大于等于96小时
1105	D06(ICU)	2022-01-02	2022-01-09	3180811	徐珠花	女	79Y	股骨粗隆间骨折	肺栓塞;肺部感染;骨折治疗后恢复期;高血压病;2型糖尿病;心功能不全	好转	龚裕强	张晓隆	胡建坚	股骨骨折闭合复位髓内针内固定术
1106	D06(ICU)	2025-12-12	2022-01-11	3181509	朱帮光	男	90Y	股骨颈骨折	多器官功能障碍综合征(MODS);心律失常;肾衰竭;心功能不全;肺部感染;呼吸衰竭	好转	程碧环	林孟相	林孟相	人工股骨头置换术
1107	D06(ICU)	2025-12-28	2022-01-13	3182351	杨贤良	男	81Y	慢性阻塞性肺病伴急性加重	呼吸衰竭;肺部感染;消化道出血;股骨粗隆间骨折;陈旧性肋骨骨折;胸椎骨折;下肢深静脉血栓形成;脑梗死个人史;高血压性肾衰竭	未愈	龚裕强	龚裕强	谢媚媚
1108	D06(ICU)	2022-01-03	2022-01-15	3182862	林华敏	男	54Y	创伤性硬膜下出血	创伤性蛛网膜下腔出血;肺部感染;肝功能不全;脑挫伤;下肢动脉粥样硬化;继发性血小板增多症;大手术个人史;腰椎骨折;骶骨骨折;高脂血症;肾结石;后天性肾囊肿;前列腺钙化灶;下肢深静脉血栓形成	好转	程碧环	王本极	王本极	有创呼吸机治疗小于96小时
1109	D06(ICU)	2022-01-10	2022-01-17	3183617	余德霓	女	83Y	急性冠脉综合征	冠状动脉粥样硬化性心脏病;肋骨骨折;肺部感染;呼吸衰竭;循环衰竭;癫痫;硬脑膜下积液;2型糖尿病性肾病;慢性肾脏病5期;高血压性肾衰竭;颈动脉硬化;下肢动脉粥样硬化;胆囊结石;胆囊息肉;后天性肾囊肿;心源性休克	死亡	程碧环	陈如杰	陈如杰	有创呼吸机治疗小于96小时
1110	D06(ICU)	2022-01-15	2022-01-20	3184672	柳一芝	男	80Y	创伤性休克	乳酸性酸中毒;多发性腰椎骨折;重度贫血;肱骨上端骨折;锁骨骨折;多发性肋骨骨折;后天性肾囊肿;肱骨头骨折;肩关节脱位;眶骨骨折;腔隙性脑梗死;2型糖尿病;胆囊结石;胫腓骨干骨折	未愈	龚裕强	张晓隆	张晓隆	有创呼吸机治疗小于96小时
1111	D06(ICU)	2022-01-21	2022-01-23	3186043	徐杨柳	女	54Y	结肠损伤	急性坏死性肠炎;脓毒血症;腹水;感染性休克;急性化脓性阑尾炎;腓骨骨折;尿毒症;闭合性胫骨平台骨折;不完全性肠梗阻;2型糖尿病;髂静脉血栓形成;股静脉血栓形成;下肢深静脉血栓形成	未愈	龚裕强	戴凌燕	傅蓓蓓	肠粘连松解术;小肠造口术;右半结肠切除术;血液净化;有创呼吸机治疗小于96小时;腹部冲洗引流术
1112	D06(ICU)	2022-01-16	2022-02-02	3189351	林玉英	女	85Y	股骨粗隆间骨折	肱骨上端骨折;高血压病;骨质疏松;支气管哮喘，非危重;肺部感染;心功能不全	未愈	戴凌燕	魏大臻	魏大臻	股骨骨折切开复位髓内针内固定术
1113	D06(ICU)	2022-02-03	2022-02-03	3190317	许文跃	男	62Y	重症肺炎	呼吸心跳骤停;糖尿病;胸椎骨折;慢性支气管炎;支气管哮喘，非危重	未愈	程碧环	程碧环	王瑞丽	心肺复苏
1114	D06(ICU)	2022-03-01	2022-03-07	3200330	姚仁葱	男	68Y	颈部脊髓损伤	肺部感染;胃恶性肿瘤个人史;四肢瘫痪;颈椎骨折;头皮撕脱;肝占位性病变;肺挫伤;肋骨骨折;肝囊肿;脑卒中后遗症	未愈	龚裕强	龚裕强	谢媚媚	气管插管
1115	D06(ICU)	2022-03-03	2022-03-07	3200331	胡玉英	女	73Y	创伤性硬膜下出血	后天性肾囊肿;脑疝;脑挫伤;蛛网膜下腔出血;枕骨骨折;肺部感染;下肢动脉粥样硬化	好转	程碧环	王本极	王本极	颅骨切除减压术;脑膜切开伴硬脑膜下腔血肿清除术;有创呼吸机治疗大于等于96小时
1116	D06(ICU)	2022-01-09	2022-03-13	3202512	陈金媛	女	74Y	真菌败血症	感染性休克;胆道感染;肺部感染;股骨颈骨折;脾大;腹水;消化道出血;多器官功能障碍综合征(MODS);脂肪肝;胸腔积液	死亡	程碧环	程碧环	陈德准	全髋关节表面置换术
1117	D06(ICU)	2022-02-27	2022-03-14	3202875	林翠竹	女	82Y	消化道出血	凝血障碍;肾衰竭;贫血;电解质代谢紊乱;股骨颈骨折;胸腔积液;2型糖尿病;胆囊结石;肾结石;老年性痴呆;肝囊肿;后天性肾囊肿	未愈	龚裕强	郭献阳	郭献阳
1118	D06(ICU)	2022-02-19	2022-04-06	3211324	肖伯平	女	73Y	消化道穿孔	脑干梗死;脑梗死;房性早搏;手术后切口感染;股骨粗隆间骨折;感染性休克;肾衰竭;消化道出血;肝脓肿;阑尾炎;肺部感染;脑出血;心功能不全;脑萎缩;急性化脓性腹膜炎;急性冠脉综合征;二尖瓣及三尖瓣关闭不全;胆囊切除术后状态	死亡	龚裕强	魏大臻	魏大臻	结肠永久性造口术;阑尾切除术;肠粘连松解术;腹腔冲洗检查;乙状结肠切除术;股骨骨折闭合复位螺钉内固定术
1119	D06(ICU)	2022-04-09	2022-04-23	3217227	林永钗	女	88Y	股骨颈骨折	心房颤动;肺部感染;后天性肾囊肿;重度贫血;胰腺囊肿;肾衰竭;高血压性心脏病;心功能不全;胸腔积液	好转	程碧环	陈如杰	陈如杰	髋关节病损切除术;人工股骨头置换术
1120	D06(ICU)	2022-05-11	2022-05-13	3224296	徐永福	男	29Y	化脓性脑膜炎	急性心肌炎;肾衰竭;额骨骨折;头皮血肿;肾周积液;颅腔积气	未愈	龚裕强	魏大臻	魏大臻	深静脉穿刺
1121	D06(ICU)	2022-05-08	2022-05-14	3224774	叶臣香	女	77Y	股骨颈骨折	胆囊结石;心房颤动;退行性主动脉瓣疾患;二尖瓣返流;肺动脉高压中度;三尖瓣疾病;肾衰竭;肺部感染;胸腔积液;下肢静脉曲张;心脏扩大;心功能不全;下肢动脉粥样硬化;脑梗死后遗症	未愈	龚裕强	魏大臻	魏大臻	髋关节滑膜切除术;人工股骨头置换术;气管插管
1122	D06(ICU)	2022-05-03	2022-05-18	3226363	叶金花	女	95Y	肠梗阻	胸腔积液;肺部感染;输尿管积水;股骨颈骨折;肺不张;肾积水伴输尿管结石;急性肾衰竭;肾结石;动脉粥样硬化;高血压病	好转	程碧环	程碧环	王瑞丽
1123	D06(ICU)	2022-05-08	2022-05-18	3226381	王振华	男	77Y	创伤性硬膜下出血	脊柱压缩性骨折;肺部感染;高血压病;颅内损伤;慢性呼吸衰竭;创伤性脑疝;创伤性蛛网膜下腔出血;肾衰竭;下肢动脉粥样硬化	死亡	程碧环	王本极	王本极	颅骨钻孔减压术;脑内血肿清除术;有创呼吸机治疗大于等于96小时
1124	D06(ICU)	2025-12-26	2022-05-25	3228923	王露西	女	15Y	创伤性肾破裂	肾上腺出血;血管瘤;胆囊坏疽;皮肤和皮下组织局部感染;创伤性肝动脉破裂;骶尾关节脱位;腰骶部脊柱骨折;腹腔间隔室综合征;失血性休克;急性肾衰竭;液气胸;脓毒血症;脊髓损伤;肺挫伤;骨盆骨折;肋骨骨折;褥疮;泌尿道感染;消化道出血;腹膜炎	治愈	龚裕强	龚裕强	傅蓓蓓	腹腔血肿清除术;创面负压封闭引流[VSD];肝动脉栓塞术;肾动脉栓塞术;髂内动脉栓塞术;胆囊切除术;全部臀位牵引术;同种皮肤移植术;骶部脓肿切开引流术;腹腔穿刺术;胸腔闭式引流术;皮瓣修整术;腹腔粘连松解术;胸腔穿刺置管术;剖腹探查术
1125	D06(ICU)	2022-06-08	2022-06-09	3234518	徐爱珠	女	59Y	脑疝	颅腔积气;创伤性蛛网膜下腔出血;脑干挫伤;耻骨骨折;眶骨骨折;枕骨骨折;颅底骨折;额骨骨折;呼吸衰竭;胆管出血;肺水肿;创伤性急性硬膜下出血	死亡	程碧环	陈如杰	陈如杰	脑内血肿清除术;颅骨骨瓣修补术
1126	D06(ICU)	2022-07-10	2022-07-11	3246868	金益存	男	73Y	创伤性脑疝	颅骨骨折;脑外伤后综合征;创伤性硬膜下出血	未愈	龚裕强	郭献阳	胡建坚	颅骨骨瓣修补术;脑内血肿清除术
1127	D06(ICU)	2022-06-26	2022-07-12	3247333	王顺良	男	64Y	颅内出血	腰椎间盘突出;特指手术后状态;脂肪肝;骨折治疗后恢复期;冠状动脉介入治疗后随诊检查;高血压病;脑疝;冠状动脉粥样硬化;冠状动脉粥样硬化性心脏病	好转	龚裕强	郭献阳	郭献阳	脑内血肿清除术;单根导管冠状动脉造影;经皮冠状动脉支架置入术;立体定向颅内血肿穿刺引流术;颅骨切除减压术
1128	D06(ICU)	2022-07-12	2022-07-19	3250208	徐克进	男	101Y	肺部感染	2型糖尿病;癫痫;高血压病;多发性脑梗死;低蛋白血症;下肢动脉粥样硬化;下肢静脉血栓形成;颈动脉硬化;锁骨下动脉粥样硬化;特指手术后状态;陈旧性股骨骨折	好转	龚裕强	程碧环	张文武
1129	D06(ICU)	2022-05-25	2022-07-23	3251798	王露西	女	15Y	下肢皮肤感染	肋骨骨折;胆囊切除术后状态;皮肤移植状态;特指手术后状态;脑血管瘤;腹泻;褥疮;眼底出血;念珠菌性败血症;腹膜炎;泌尿道感染;脊髓损伤;截瘫;骨盆骨折	好转	龚裕强	龚裕强	傅蓓蓓	滑囊病损切除术;创面负压封闭引流[VSD];皮瓣修整术;结肠暂时性造口术
1130	D06(ICU)	2022-07-29	2022-08-01	3255588	彭啟君	男	62Y	创伤性脑出血	肺挫伤;胸椎骨折;腰椎骨折;创伤性蛛网膜下腔出血;肺部感染;创伤性硬膜下出血;创伤性脑疝;顶骨骨折;头皮血肿;肋骨骨折	未愈	程碧环	魏大臻	魏大臻	颅骨钻孔减压术;脑内血肿清除术
1131	D06(ICU)	2022-07-26	2022-08-10	3259465	陈敬涨	男	63Y	脊髓损伤	脑挫伤;创伤性硬膜外血肿;颈椎椎管狭窄;特指手术后状态;胆囊结石;肾结石;膀胱结石;肺部感染;上颌骨骨折;肩胛骨骨折;肋骨骨折;额骨骨折;截瘫;颈椎间盘突出	未愈	龚裕强	魏大臻	魏大臻	颈椎后路单开门椎管减压术;气管插管;后入路颈椎融合术
1132	D06(ICU)	2022-08-03	2022-08-13	3262179	任纪先	男	55Y	弥漫性脑损伤	多发性颅骨骨折;头皮裂伤;耳出血;急性肾衰竭;尿崩症;肺部感染;电解质代谢紊乱;肝功能不全;创伤性胸腔积液;皮肤裂伤;慢性乙型病毒性肝炎;创伤性脑疝;创伤性蛛网膜下腔出血;慢性呼吸衰竭	死亡	龚裕强	龚裕强	傅蓓蓓	颅骨钻孔减压术;有创呼吸机治疗大于等于96小时;皮肤和皮下组织非切除性清创;血液透析
1133	D06(ICU)	2022-07-22	2022-09-03	3268790	赵学友	男	39Y	髋和大腿水平创伤性切断	髋和大腿水平多神经损伤;失血性休克;感染性休克;截断术残端感染;感染性全身炎症反应综合征伴器官衰竭;开放性多发性髋和大腿损伤;骨盆骨折;多处浅表损伤;股动脉损伤;髋和大腿水平股静脉损伤	好转	龚裕强	郭献阳	郭献阳	创面负压封闭引流[VSD];残端皮肤修整术;皮肤和皮下坏死组织切除清创术;残端修正术;胸腔穿刺置管术;中厚皮片移植术;下肢静脉结扎术;下肢动脉结扎术;大腿离断术;手术后伤口止血术
1134	D06(ICU)	2022-09-09	2022-09-12	3272263	李亨才	男	74Y	腰椎骨折	股骨粗隆间骨折;多发性肋骨骨折;肺挫伤;创伤性胸腔积液;慢性失血性贫血;艾滋病;肺部感染;肺气肿;腹股沟斜疝	未愈	龚裕强	郭献阳	郭献阳	气管插管
1135	D06(ICU)	2022-09-13	2022-09-20	3275183	陈正虎	男	68Y	髂骨骨折	多发性肋骨骨折;液气胸;肺挫伤;急性冠脉综合征;心源性休克;冠状动脉支架植入后状态;高血压病;痛风;骶骨骨折;耻骨骨折;胸腔积液;高脂血症;慢性上颌窦炎;创伤性皮下气肿;腰椎骨折;创伤性蛛网膜下腔出血;头皮血肿	好转	龚裕强	郭献阳	谢媚媚	骨盆外固定架固定术;髂骨骨折切开复位钢板内固定术
1136	D06(ICU)	2022-07-30	2022-09-23	3276360	林玉莲	女	77Y	感染性休克	胆总管结石;胆囊结石;输尿管扩张;输尿管梗阻;下肢动脉粥样硬化;腹膜后肿物;肿瘤性病理性骨折;多发性脑梗死;心房颤动;特指肾盂积水;急性肾衰竭;肺部感染;胸腔积液;贫血;腹腔淋巴结肿大;躯干局部肿胀、肿物和肿块;特指手术后状态;2型糖尿病	未愈	龚裕强	戴凌燕	218359	颈静脉造影;颈内静脉穿刺中心静脉置管术;髂部病损穿刺活检;腹膜后活检术
1137	D06(ICU)	2022-10-03	2022-10-03	3280076	沙其红	男	38Y	创伤性硬膜外出血	创伤性硬膜下出血;颅内损伤;创伤性蛛网膜下腔出血;颅骨骨折;头皮血肿;颅腔积气;创伤性脑疝	未愈	龚裕强	魏大臻	魏大臻	脑内血肿清除术;颅骨钻孔减压术
1138	D06(ICU)	2022-10-03	2022-10-05	3280749	Я无名7281	男	70Y	创伤性硬膜下出血	颅骨骨折;头皮血肿;创伤性脑血肿;创伤性脑疝;脑挫伤;颅内损伤	死亡	程碧环	陈建时	陈建时	颅骨钻孔减压术;脑内血肿清除术
1139	D06(ICU)	2022-10-01	2022-10-07	3281093	王长江	男	76Y	急性冠脉综合征	肺部感染;多器官功能障碍综合征(MODS);颈椎骨折;颈椎间盘突出;胸椎骨折;多发性肋骨骨折;低钠血症;阿尔茨海默病;心功能不全;心源性休克;颈部脊髓损伤;脊髓缺血;尺骨桡骨远端骨折;肺挫伤;低氯血症;胆囊切除术后状态;特指手术后状态	死亡	龚裕强	魏大臻	魏大臻	血液净化;气管插管
1140	D06(ICU)	2022-09-29	2022-10-07	3281105	林得清	男	87Y	创伤性脑出血	脑挫伤;颞骨骨折;高血压病;肺部感染;老年性脑萎缩;腔隙性脑梗死;创伤性硬膜外血肿;肺栓塞	好转	程碧环	林孟相	林孟相	颅骨骨瓣修补术
1141	D06(ICU)	2022-10-18	2022-10-19	3285761	马中原	男	45Y	创伤性脑出血	创伤性蛛网膜下腔出血;肺挫伤;眶骨骨折;颧骨骨折;开放性肘损伤;多发性肋骨骨折;下颌骨骨折;创伤性脑疝	未愈	程碧环	林孟相	林孟相	脑室钻孔引流术;脑室导管置换术
1142	D06(ICU)	2022-10-15	2022-10-21	3286751	张小林	男	64Y	创伤性肝破裂	脂肪肝;后天性肾囊肿;创伤性蛛网膜下腔出血;多器官功能障碍综合征(MODS);弥散性血管内凝血;桡骨下端骨折;脑挫伤;失血性休克;开放性髌骨骨折;距骨骨折;面部软组织挫伤;多发性肋骨骨折;胸腔积液;特指手术后状态;高血压病;2型糖尿病	死亡	龚裕强	龚裕强	傅蓓蓓	剖腹探查术;肝破裂出血止血术;有创呼吸机治疗小于96小时;肝动脉栓塞术;肝破裂修补术;肝动脉造影
1143	D06(ICU)	2022-10-20	2022-10-22	3287052	潘显敏	女	47Y	创伤性蛛网膜下腔出血	脑挫伤;创伤性脑疝;子宫肿物;肋骨骨折;颅骨骨折;心脏骤停	死亡	龚裕强	张晓隆	张晓隆	颅骨钻孔减压术;有创呼吸机治疗小于96小时;脑内血肿清除术
1144	D06(ICU)	2022-11-05	2022-11-10	3294502	胡松柳	女	92Y	冠状动脉粥样硬化性心脏病	股骨颈骨折;老年性心脏病;心房颤动;心功能不全;急性肾衰竭;肝功能不全;胆囊结石;输尿管结石;左心衰竭;凝血障碍	好转	戴凌燕	戴凌燕	李忠旺	深静脉穿刺
1145	D06(ICU)	2022-11-08	2022-11-11	3294580	陈爱斌	男	67Y	弥漫性脑损伤	创伤性脑疝;中枢性呼吸衰竭;肝功能不全;急性失血性贫血;胸壁浅表损伤;肋骨骨折	未愈	戴凌燕	戴凌燕	戴凌燕	脑内血肿清除术;颅骨钻孔减压术
1146	D06(ICU)	2022-11-02	2022-11-29	3301768	林正元	男	88Y	感染性休克	双眼白内障;陈旧性腰椎骨折;腰椎间盘突出;骨质疏松;肺部感染;2型糖尿病性酮症酸中毒;冠状动脉粥样硬化性心脏病;高血压性心脏病;心功能Ⅳ级;甲状腺机能减退症;肺结节;脑梗死后遗症;贫血;丘脑出血;哮喘;支气管扩张;颈动脉硬化;前列腺结石	死亡	龚裕强	魏大臻	魏大臻
1147	D06(ICU)	2022-11-27	2022-12-04	3303666	陈玉兰	女	74Y	肺部感染	2型糖尿病性视网膜病变;2型糖尿病性周围神经病;颈动脉硬化;下肢动脉粥样硬化;锁骨下动脉粥样硬化;高脂血症;脂肪肝;高尿酸血症;骨质疏松;多发性肋骨骨折;单纯性肾囊肿;甲状腺结节;肺结节;腔隙性脑梗死;心脏停搏复苏成功;呼吸心跳骤停	好转	程碧环	陈建时	陈建时
1148	D06(ICU)	2022-11-29	2022-12-15	3308255	何大润	男	59Y	弥漫性脑损伤	创伤性蛛网膜下腔出血;创伤性硬膜外血肿;创伤性脑疝;肩胛骨骨折;颅腔积气;骨盆骨折;2型糖尿病;急性呼吸衰竭	死亡	龚裕强	龚裕强	张文武	脑内血肿清除术;深静脉穿刺;气管插管;颅骨钻孔减压术
1149	D06(ICU)	2022-11-21	2022-12-26	3312317	吴旭峰	男	47Y	颈部脊髓特指损伤	肺部感染;强直性脊柱炎;颈椎骨折;截瘫	好转	龚裕强	张晓隆	张晓隆	暂时性气管切开术;颅骨牵引;颈椎脱位切开复位内固定术;颈椎植骨术;颈椎椎板切除减压术;后入路颈椎融合术;有创呼吸机治疗大于等于96小时
1150	D06(ICU)	2022-12-30	2022-12-30	3313930	潘招弟	女	80Y	创伤性硬膜下出血	循环衰竭;创伤性蛛网膜下腔出血;脑疝;脑挫伤;颞骨骨折;眶骨骨折;头皮血肿;多发性肋骨骨折;胸椎骨折;腰椎骨折;股骨骨折;呼吸衰竭;心脏骤停;心脏停搏复苏成功	未愈	戴凌燕	戴凌燕	戴凌燕	脑膜切开伴硬脑膜下腔血肿清除术;颅骨钻孔减压术
1151	D07儿童骨科、骨盆外科	2025-12-23	2022-01-01	3178035	肖小红	女	41Y	髌骨骨折	特指手术后状态	治愈	孔建中	孔建中	陈墨川	髌骨骨折切开复位螺钉内固定术;关节软骨修复术;股四头肌成形术
1152	D07儿童骨科、骨盆外科	2025-12-18	2022-01-02	3178156	吴朝晖	女	46Y	胫腓骨干骨折		治愈	孔建中	孔建中	陈墨川	胫骨骨折切开复位钢板内固定术
1153	D07儿童骨科、骨盆外科	2025-12-28	2022-01-02	3178165	陈海欧	男	12Y	尺骨桡骨闭合性骨折		治愈	张敬东	毛诚晃	闫广奎	桡骨骨折闭合复位髓内针内固定术;尺骨骨折闭合复位髓内针内固定术
1154	D07儿童骨科、骨盆外科	2025-12-20	2022-01-02	3178174	潘迦崇	男	7Y	胫腓骨干骨折	小腿水平肌腱损伤;开放性足损伤;鼻骨骨折	治愈	张敬东	易先宏	闫广奎	石膏绷带固定;胫骨骨折切开复位钢针内固定术;下肢肌腱缝合术;皮肤和皮下坏死组织切除清创术;创面负压封闭引流[VSD]
1155	D07儿童骨科、骨盆外科	2025-12-26	2022-01-02	3178310	张恒宇	男	5Y	股骨髁骨折	肺挫伤;头皮血肿	治愈	张敬东	李玉安	闫广奎	股骨骨折闭合复位钢针内固定术
1156	D07儿童骨科、骨盆外科	2025-12-26	2022-01-02	3178430	郭荷兰	女	66Y	取除骨折内固定装置	高血压病;肾结石;脂肪肝;肋骨骨折	其他	翁益民	翁益民	王特	锁骨内固定物取出术
1157	D07儿童骨科、骨盆外科	2025-12-26	2022-01-03	3178636	温科出	男	63Y	髌骨骨折	脂肪肝	治愈	孔建中	孔建中	陈墨川	髌韧带重建术;髌骨骨折切开复位螺钉内固定术;关节软骨修复术
1158	D07儿童骨科、骨盆外科	2025-12-21	2022-01-03	3178696	项友莲	女	55Y	跟骨骨折	下肢动脉粥样硬化	治愈	孔建中	孔建中	陈墨川	跟骨植骨术;跟骨骨折切开复位钢针内固定术;关节软骨修复术
1159	D07儿童骨科、骨盆外科	2025-12-20	2022-01-04	3178968	潘丽华	女	37Y	双踝骨折	脂肪肝	治愈	孔建中	孔建中	陈墨川	关节软骨修复术;踝关节骨折切开复位钢针内固定术;踝关节融合术
1160	D07儿童骨科、骨盆外科	2025-12-22	2022-01-04	3178970	李品达	男	9Y	股骨骨折		好转	张敬东	易先宏	闫广奎	股骨骨折闭合复位钢针内固定术
1161	D07儿童骨科、骨盆外科	2025-12-18	2022-01-04	3178973	王靖敏	男	62Y	跟骨骨折	肥厚型非梗阻性心肌病;多发性肝囊肿;高血压病;冠状动脉粥样硬化性心脏病;后天性肾囊肿	治愈	孔建中	孔建中	陈墨川	创面负压封闭引流[VSD];跟骨骨折切开复位钢针内固定术;关节软骨修复术;跟骨植骨术
1162	D07儿童骨科、骨盆外科	2025-12-31	2022-01-04	3178978	陈伟	男	8Y	肱骨髁上骨折		治愈	张敬东	李玉安	闫广奎	肱骨骨折闭合复位钢针内固定术
1163	D07儿童骨科、骨盆外科	2025-12-30	2022-01-05	3179291	陈仪蓁	女	4Y	肱骨髁上骨折		治愈	张敬东	易先宏	方明桥	肱骨骨折闭合复位钢针内固定术
1164	D07儿童骨科、骨盆外科	2022-01-03	2022-01-06	3179641	戴源慧	男	61Y	取除骨折内固定装置	前列腺增生;肝囊肿;脂肪肝;前列腺结石	其他	孔建中	孔建中	陈墨川	髌骨内固定物取出术
1165	D07儿童骨科、骨盆外科	2025-12-20	2022-01-06	3179655	刘献丰	男	43Y	跟骨骨折	主动脉瓣疾患;二尖瓣返流;多发性肝囊肿;肾结石	治愈	孔建中	孔建中	陈墨川	关节软骨修复术;跟骨骨折切开复位钢针内固定术;跟骨植骨术
1166	D07儿童骨科、骨盆外科	2025-12-25	2022-01-06	3179732	余存纪	男	58Y	桡骨下端骨折	特指腕骨骨折	治愈	孔建中	孔建中	陈墨川	手部肌腱移位术;桡骨骨折切开复位钢针内固定术;关节软骨修复术
1167	D07儿童骨科、骨盆外科	2022-01-06	2022-01-08	3180050	籍万金	男	62Y	胫骨下端骨折	跟骨骨折;腰椎骨折	未愈	孔建中	孔建中	陈墨川
1168	D07儿童骨科、骨盆外科	2022-01-05	2022-01-08	3180140	李森林	男	8Y	肱骨髁上骨折		好转	张敬东	李玉安	闫广奎	肱骨骨折闭合复位钢针内固定术
1169	D07儿童骨科、骨盆外科	2025-12-31	2022-01-08	3180154	周宇杰	男	16Y	踝骨闭合性骨折		治愈	陈龙	陈龙	应晓洲	踝关节骨折切开复位钢针内固定术
1170	D07儿童骨科、骨盆外科	2025-11-26	2022-01-08	3180375	李丽	女	45Y	开放性胫腓骨干骨折	下肢皮肤撕裂伤;下肢血管损伤;下肢神经损伤;特指手术后状态;头皮血肿;下肢肌腱损伤;多处浅表损伤	治愈	翁益民	翁益民	王特	胫骨外固定架固定术;胫骨钢针内固定术;创面负压封闭引流[VSD];腓骨骨折闭合复位髓内针内固定术
1171	D07儿童骨科、骨盆外科	2022-01-01	2022-01-09	3180491	匡弘博	男	2Y	开放性指骨骨折	特指手指指神经损伤	治愈	张敬东	易先宏	方明桥	手肌腱、血管、神经探查术;指骨骨折切开复位钢针内固定术
1172	D07儿童骨科、骨盆外科	2025-12-27	2022-01-09	3180604	李珠兰	女	55Y	桡骨下端骨折	外踝骨折;特指手术后状态;前臂正中神经损伤;多发性损伤	治愈	孔建中	孔建中	陈墨川	桡骨骨折闭合复位钢针内固定术;桡骨外固定架固定术;皮肤和皮下坏死组织切除清创术
1173	D07儿童骨科、骨盆外科	2025-12-19	2022-01-09	3180609	吴宝台	男	21Y	胫腓骨干骨折	肱骨上端骨折;二头肌长头肌肉和肌腱损伤;脂肪肝	治愈	翁益民	翁益民	王特	肱二头肌缝合术;肱骨骨折切开复位钢板内固定术;胫骨骨折切开复位钢板内固定术
1174	D07儿童骨科、骨盆外科	2022-01-05	2022-01-09	3180640	陈秋燕	女	28Y	髋关节脱位	股骨颈骨折;髋关节积液;髂骨骨折;骶骨骨折;肾结石;脑挫伤;面部擦伤;耻骨骨折;头皮血肿	治愈	翁益民	翁益民	王特	髋关节脱位闭合复位术
1175	D07儿童骨科、骨盆外科	2025-12-29	2022-01-09	3180693	李方忠	男	50Y	桡骨下端骨折	高血压病;脂肪肝	治愈	孔建中	孔建中	陈墨川	关节软骨修复术;桡骨骨折切开复位钢针内固定术
1176	D07儿童骨科、骨盆外科	2022-01-03	2022-01-10	3180869	盛康豪	男	4Y	肱骨外髁骨折		好转	张敬东	李玉安	闫广奎	肱骨骨折切开复位钢针内固定术;关节软骨修复术
1177	D07儿童骨科、骨盆外科	2022-01-06	2022-01-10	3180908	沈家奇	男	10Y	肱骨髁上骨折		治愈	张敬东	易先宏	方明桥	肱骨骨折闭合复位钢针内固定术
1178	D07儿童骨科、骨盆外科	2025-12-27	2022-01-10	3180946	董强强	男	14Y	尺骨桡骨骨干骨折		治愈	翁益民	翁益民	王特	尺骨骨折切开复位钢板内固定术;桡骨骨折切开复位钢板内固定术
1179	D07儿童骨科、骨盆外科	2022-01-01	2022-01-10	3180969	张青	男	47Y	尺骨桡骨闭合性骨折	脂肪肝;胆囊息肉;胆囊结石	治愈	孔建中	孔建中	陈墨川	桡骨骨折切开复位钢板内固定术;尺骨植骨术;尺骨骨折切开复位钢板内固定术
1180	D07儿童骨科、骨盆外科	2022-01-03	2022-01-10	3180972	周若凯	男	41Y	取除骨折内固定装置	脂肪肝;胆囊息肉	其他	孔建中	孔建中	陈墨川	腓骨内固定物取出术;胫骨内固定物取出术
1181	D07儿童骨科、骨盆外科	2022-01-02	2022-01-10	3181011	陈彦颖	女	10Y	肱骨外髁骨折	特指手术后状态	治愈	张敬东	易先宏	闫广奎	肱骨骨折切开复位钢针内固定术;关节软骨修复术
1182	D07儿童骨科、骨盆外科	2025-12-28	2022-01-11	3181256	柯美玉	女	87Y	股骨颈骨折	脑梗死后遗症;心房颤动;后天性肾囊肿;肝囊肿;胆囊结石;高血压病	治愈	孔建中	孔建中	陈墨川	全髋关节表面置换术
1183	D07儿童骨科、骨盆外科	2022-01-05	2022-01-11	3181265	杨博文	男	8Y	肱骨外科颈骨折		好转	张敬东	李玉安	闫广奎	肱骨骨折闭合复位钢针内固定术
1184	D07儿童骨科、骨盆外科	2025-12-31	2022-01-11	3181267	魏成宇	男	8Y	踝和足水平趾长屈肌和肌腱损伤	特指趾骨骨折;足软组织异物残留	治愈	张敬东	李玉安	闫广奎	足异物去除;趾肌腱缝合术
1185	D07儿童骨科、骨盆外科	2022-01-03	2022-01-11	3181273	夏肇哲	男	13Y	尺骨桡骨远端骨折		治愈	张敬东	易先宏	闫广奎	桡骨骨折切开复位钢针内固定术
1186	D07儿童骨科、骨盆外科	2022-01-09	2022-01-12	3181609	金思佚	女	14Y	取除骨折内固定装置		其他	张敬东	李玉安	闫广奎	踝关节内固定物取出术
1187	D07儿童骨科、骨盆外科	2022-01-02	2022-01-12	3181691	林程程	女	12Y	闭合性胫骨平台骨折	小腿特指浅表损伤;踝和足浅表损伤	治愈	张敬东	叶晓华	闫广奎	石膏绷带固定;膝关节镜检查
1188	D07儿童骨科、骨盆外科	2022-01-08	2022-01-12	3181714	尤奕	男	1Y	肱骨髁上骨折		好转	张敬东	易先宏	闫广奎	肱骨骨折闭合复位钢针内固定术
1189	D07儿童骨科、骨盆外科	2022-01-04	2022-01-12	3181754	陈绕宇	男	44Y	锁骨骨折	耻骨骨折;脑震荡;脂肪肝	治愈	陈华	孙辽军	卢迪	锁骨骨折切开复位钢针内固定术
1190	D07儿童骨科、骨盆外科	2025-12-27	2022-01-12	3181967	叶倬赫	男	13Y	股骨特指部位骨折	指纤维组织瘤样增生	治愈	孔建中	孔建中	陈墨川	股骨病损切除术;股骨骨折切开复位钢针内固定术;股骨植骨术
1191	D07儿童骨科、骨盆外科	2022-01-08	2022-01-13	3182096	章嘉益	男	2Y	肱骨髁上骨折		治愈	张敬东	易先宏	方明桥	肱骨骨折闭合复位钢针内固定术
1192	D07儿童骨科、骨盆外科	2022-01-02	2022-01-13	3182135	陈阿柳	女	75Y	股骨粗隆间骨折	下肢动脉粥样硬化;肺部感染;骨质疏松;2型糖尿病;股骨粗隆下骨折;特指手术后状态;高血压病	治愈	赵友明	赵友明	柯陈荣	股骨骨折闭合复位钢针内固定术
1193	D07儿童骨科、骨盆外科	2022-01-05	2022-01-15	3182467	王凯新	男	5Y	股骨骨折		治愈	张敬东	易先宏	闫广奎	股骨骨折闭合复位钢针内固定术
1194	D07儿童骨科、骨盆外科	2022-01-03	2022-01-15	3182472	郑苡桓	男	2Y	鹰嘴骨折	急性上呼吸道感染	治愈	孔建中	孔建中	陈墨川	尺骨骨折切开复位钢针内固定术
1195	D07儿童骨科、骨盆外科	2022-01-05	2022-01-15	3182475	李瑞庆	男	13Y	肱骨内髁骨折		治愈	张敬东	易先宏	闫广奎	肱骨骨折切开复位钢板内固定术
1196	D07儿童骨科、骨盆外科	2022-01-12	2022-01-15	3182529	叶宸昊	男	1Y	肱骨髁上骨折		好转	张敬东	李玉安	闫广奎	肱骨骨折闭合复位钢针内固定术
1197	D07儿童骨科、骨盆外科	2022-01-10	2022-01-15	3182536	王鹏	男	24Y	取除骨折内固定装置	脂肪肝	其他	孔建中	孔建中	陈墨川	股骨内固定物取出术
1198	D07儿童骨科、骨盆外科	2022-01-11	2022-01-15	3182538	孙浩嘉	男	8Y	取除骨折内固定装置		其他	张敬东	李玉安	闫广奎	胫骨内固定物取出术
1199	D07儿童骨科、骨盆外科	2022-01-10	2022-01-15	3182551	金徐晗	女	6Y	桡骨颈骨折	室间隔缺损	治愈	张敬东	李玉安	闫广奎	桡骨骨折切开复位钢针内固定术
1200	D07儿童骨科、骨盆外科	2022-01-10	2022-01-16	3182932	吴刘府	男	53Y	取除骨折内固定装置	骨折治疗后恢复期;陈旧性腓骨骨折;脂肪肝;脊柱侧弯;胆囊息肉	其他	翁益民	翁益民	王特	踝关节内固定物取出术
1201	D07儿童骨科、骨盆外科	2022-01-08	2022-01-16	3183032	赖顺良	男	68Y	取除骨折内固定装置	糖尿病;后天性肾囊肿;心房颤动	其他	孔建中	孔建中	陈墨川	股骨内固定物取出术
1202	D07儿童骨科、骨盆外科	2022-01-02	2022-01-16	3183045	项冬梅	女	80Y	股骨粗隆间骨折	腰椎骨折;房性早搏;胆囊息肉;心房颤动;颈动脉硬化	治愈	孔建中	孔建中	陈墨川	股骨骨折闭合复位钢针内固定术
1203	D07儿童骨科、骨盆外科	2022-01-14	2022-01-16	3183056	温作沄	男	5Y	肱骨髁上骨折		治愈	张敬东	易先宏	闫广奎	肱骨骨折闭合复位钢针内固定术
1204	D07儿童骨科、骨盆外科	2025-12-22	2022-01-16	3183229	陈时妹	女	85Y	股骨颈骨折	膝关节病;蛛网膜囊肿;下肢动脉粥样硬化;脂肪肝;肾结石;老年性脑萎缩;脑缺血灶;髋关节积液;骨质疏松;开放性髋损伤	治愈	翁益民	翁益民	王特	创面负压封闭引流[VSD];人工股骨头置换术
1205	D07儿童骨科、骨盆外科	2022-01-11	2022-01-16	3183244	付臣林	男	56Y	取除骨折内固定装置	前列腺增生;下肢动脉粥样硬化;高血压病	其他	翁益民	翁益民	王特	胫骨内固定物取出术
1206	D07儿童骨科、骨盆外科	2022-01-10	2022-01-17	3183316	方存通	男	64Y	肱骨上端骨折	单纯性肾囊肿;高血压病	治愈	孔建中	孔建中	陈墨川	肱骨骨折切开复位钢针内固定术
1207	D07儿童骨科、骨盆外科	2022-01-09	2022-01-17	3183371	林翠竹	女	60Y	肱骨髁间骨折		治愈	陈华	孙辽军	卢迪	肱骨骨折切开复位钢针内固定术
1208	D07儿童骨科、骨盆外科	2022-01-13	2022-01-17	3183420	杨德钲	男	2Y	鹰嘴骨折		治愈	张敬东	李玉安	方明桥	尺骨骨折闭合复位钢针内固定术
1209	D07儿童骨科、骨盆外科	2022-01-13	2022-01-17	3183518	张雪艳	女	10Y	股骨下端骨折	病理性骨折	好转	张敬东	易先宏	闫广奎
1210	D07儿童骨科、骨盆外科	2022-01-10	2022-01-17	3183521	赵世菊	女	54Y	肱骨外科颈骨折	高血压病;脂肪肝;脑梗死后遗症;2型糖尿病	治愈	翁益民	翁益民	王特	肱骨骨折切开复位钢针内固定术
1211	D07儿童骨科、骨盆外科	2022-01-06	2022-01-18	3183773	冯守君	男	34Y	股骨干骨折	股骨颈骨折;髌骨骨折;肋骨骨折;特指手术后状态	治愈	孔建中	孔建中	陈墨川	股骨植骨术;股骨骨折切开复位钢针内固定术;股骨骨折闭合复位钢针内固定术;皮肤和皮下坏死组织切除清创术
1212	D07儿童骨科、骨盆外科	2022-01-12	2022-01-18	3183785	高铭伟	男	5Y	取除骨折内固定装置		其他	张敬东	易先宏	闫广奎	瘢痕松解术;股骨内固定物取出术;胫骨内固定物取出术
1213	D07儿童骨科、骨盆外科	2022-01-16	2022-01-18	3183801	何宇轩	男	5Y	肱骨髁上骨折		好转	张敬东	李玉安	闫广奎	肱骨骨折闭合复位钢针内固定术
1214	D07儿童骨科、骨盆外科	2022-01-11	2022-01-18	3183817	张煜祺	男	6Y	肱骨外髁骨折		好转	张敬东	李玉安	闫广奎	肱骨骨折切开复位钢针内固定术
1215	D07儿童骨科、骨盆外科	2022-01-08	2022-01-19	3184098	陈诗诺	男	26Y	距骨骨折		好转	孔建中	孔建中	陈墨川	石膏绷带固定;关节软骨修复术;距骨骨折切开复位钢针内固定术
1216	D07儿童骨科、骨盆外科	2022-01-13	2022-01-19	3184141	赵馨	女	11Y	尺骨桡骨远端骨折		治愈	张敬东	李玉安	闫广奎	桡骨骨折切开复位钢板内固定术;尺骨骨折切开复位钢针内固定术
1217	D07儿童骨科、骨盆外科	2022-01-05	2022-01-19	3184325	王少青	女	47Y	跟骨骨折	脂肪肝;胆囊息肉;骨和关节软骨良性肿瘤;闭合性胫骨平台骨折	治愈	翁益民	翁益民	王特	胫骨骨折切开复位钢板内固定术;跟骨骨折切开复位钢板内固定术
1218	D07儿童骨科、骨盆外科	2022-01-15	2022-01-20	3184421	兰星晔	男	11Y	双踝骨折		治愈	张敬东	李玉安	闫广奎	踝关节骨折切开复位钢针内固定术
1219	D07儿童骨科、骨盆外科	2022-01-02	2022-01-20	3184426	金丽玉	女	64Y	闭合性胫骨平台骨折	腓骨骨折;单纯性牙周炎	治愈	孔建中	孔建中	陈墨川	胫骨植骨术;关节软骨修复术;胫骨骨折切开复位钢板内固定术
1220	D07儿童骨科、骨盆外科	2025-12-30	2022-01-20	3184431	郭春梅	女	78Y	股骨颈骨折	骨质疏松;高血压病;Ⅰ度房室传导阻滞;后天性肾囊肿;脂肪肝	治愈	孔建中	孔建中	陈墨川	全髋关节表面置换术
1221	D07儿童骨科、骨盆外科	2022-01-15	2022-01-20	3184435	倪子涵	男	6Y	取除骨折内固定装置		其他	张敬东	易先宏	闫广奎	股骨内固定物取出术
1222	D07儿童骨科、骨盆外科	2022-01-09	2022-01-21	3184699	林良玉	男	70Y	髌骨骨折	脂肪肝;2型糖尿病	好转	翁益民	翁益民	王特	髌骨骨折切开复位螺钉内固定术
1223	D07儿童骨科、骨盆外科	2022-01-17	2022-01-22	3184916	徐奥翔	男	12Y	肱骨髁上骨折		治愈	张敬东	易先宏	闫广奎	肱骨骨折闭合复位钢针内固定术
1224	D07儿童骨科、骨盆外科	2022-01-16	2022-01-22	3184957	胡铄	男	13Y	尺骨桡骨远端骨折		好转	张敬东	易先宏	闫广奎	石膏绷带固定;桡骨骨折切开复位钢针内固定术;尺骨骨折闭合复位术
1225	D07儿童骨科、骨盆外科	2022-01-16	2022-01-22	3184965	冷夏菡	女	2Y	开放性指骨骨折	开放性手部损伤	好转	张敬东	易先宏	闫广奎	皮瓣修整术;皮肤和皮下坏死组织切除清创术
1226	D07儿童骨科、骨盆外科	2022-01-12	2022-01-22	3185003	江镇轩	男	3Y	胫腓骨下端骨折		治愈	张敬东	易先宏	闫广奎	胫骨骨折切开复位钢针内固定术
1227	D07儿童骨科、骨盆外科	2022-01-11	2022-01-22	3185017	王新博	男	4Y	肱骨上端骨折	特指手术后状态;肺炎;肺结节;眼睑挫伤	好转	张敬东	易先宏	闫广奎
1228	D07儿童骨科、骨盆外科	2022-01-10	2022-01-22	3185027	郑芷彤	女	11Y	尺骨桡骨远端骨折	肱骨上端骨折;多处浅表损伤;肝损伤;创伤性肾血肿;肾上腺损伤	治愈	张敬东	易先宏	闫广奎	石膏绷带固定;桡骨骨折切开复位钢针内固定术;尺骨骨折闭合复位术
1229	D07儿童骨科、骨盆外科	2022-01-19	2022-01-22	3185124	邓偌依	女	1Y	开放性指骨骨折	开放性手部损伤	治愈	张敬东	易先宏	闫广奎	肌腱、血管、神经探查术;皮肤和皮下坏死组织切除清创术
1230	D07儿童骨科、骨盆外科	2022-01-17	2022-01-23	3185333	黄博翀	男	9Y	拇趾骨折	特指趾骨骨折	治愈	张敬东	毛诚晃	闫广奎	趾骨骨折闭合复位钢针内固定术
1231	D07儿童骨科、骨盆外科	2022-01-10	2022-01-23	3185354	李善茹	女	46Y	髌骨骨折	陈旧性胫骨骨折;膝关节病	治愈	孔建中	孔建中	陈墨川	股四头肌成形术;关节软骨修复术;髌骨骨折切开复位螺钉内固定术
1232	D07儿童骨科、骨盆外科	2022-01-13	2022-01-23	3185359	梁亦庆	男	60Y	肱骨上端骨折	特指手术后状态;前列腺增生;脂肪肝	治愈	孔建中	孔建中	陈墨川	肩袖修补术;肱骨骨折切开复位钢针内固定术
1233	D07儿童骨科、骨盆外科	2022-01-11	2022-01-23	3185393	李彩媄	女	70Y	股骨粗隆间骨折	糖尿病;特指手术后状态;呼吸道结核;下肢动脉粥样硬化;下肢静脉血栓形成	治愈	孔建中	孔建中	陈墨川	股骨骨折闭合复位钢针内固定术
1234	D07儿童骨科、骨盆外科	2022-01-17	2022-01-23	3185413	彭君浩	男	5Y	肱骨外髁骨折	鹰嘴骨折	治愈	张敬东	李玉安	闫广奎	肱骨骨折切开复位钢针内固定术
1235	D07儿童骨科、骨盆外科	2022-01-15	2022-01-23	3185475	李顺弟	男	79Y	股骨粗隆间骨折	下肢动脉粥样硬化;肺结节病;冠状动脉介入治疗后随诊检查;高血压病;糖尿病;下肢动脉狭窄	好转	翁益民	翁益民	王特
1236	D07儿童骨科、骨盆外科	2025-12-27	2022-01-23	3185580	韩彩莲	女	69Y	肱骨髁间骨折	高血压病;下肢动脉粥样硬化;脂肪肝;特指手术后状态	治愈	翁益民	翁益民	王特	肱骨骨折切开复位钢针内固定术
1237	D07儿童骨科、骨盆外科	2022-01-17	2022-01-23	3185662	毛春英	女	62Y	肱骨外科颈骨折	肱骨上端骨折;脂肪肝;后天性肾囊肿;高血压病	治愈	翁益民	翁益民	王特	肱骨植骨术;肱骨骨折切开复位钢板内固定术
1238	D07儿童骨科、骨盆外科	2022-01-20	2022-01-24	3185837	叶一菡	女	2Y	特指趾骨骨折	趾肌腱断裂;开放性足损伤	治愈	张敬东	李玉安	闫广奎	石膏绷带固定;趾肌腱缝合术;皮肤和皮下坏死组织切除清创术;趾骨骨折闭合复位钢针内固定术
1239	D07儿童骨科、骨盆外科	2022-01-17	2022-01-24	3185849	黄银香	女	94Y	股骨粗隆间骨折	下肢动脉粥样硬化;中度贫血;人工髋关节	治愈	孔建中	孔建中	陈墨川	股骨骨折闭合复位螺钉内固定术
1240	D07儿童骨科、骨盆外科	2022-01-16	2022-01-24	3185896	林翠云	女	80Y	双踝骨折	下肢动脉粥样硬化	治愈	陈华	孙辽军	卢迪	踝关节骨折切开复位钢针内固定术
1241	D07儿童骨科、骨盆外科	2022-01-15	2022-01-24	3186026	施招弟	女	85Y	腰椎骨折	陈旧性股骨粗隆间骨折;高血压病;下肢动脉粥样硬化;腰骶椎间盘突出;2型糖尿病	治愈	翁益民	翁益民	王特	腰椎骨折球囊扩张成形术
1242	D07儿童骨科、骨盆外科	2022-01-22	2022-01-25	3186088	王业衡	男	9Y	肱骨髁上骨折		好转	张敬东	易先宏	闫广奎	肱骨骨折闭合复位钢针内固定术
1243	D07儿童骨科、骨盆外科	2022-01-13	2022-01-25	3186141	叶松龙	男	58Y	开放性胫腓骨干骨折	休克;眶骨骨折;颞骨骨折;创伤性蛛网膜下腔出血;头皮血肿;头皮开放性伤口	治愈	孔建中	孔建中	陈墨川	头皮回植术;胫骨骨折闭合复位髓内针内固定术
1244	D07儿童骨科、骨盆外科	2022-01-22	2022-01-25	3186201	王辰逸	男	4Y	肱骨髁上骨折		好转	张敬东	李玉安	闫广奎	肱骨骨折闭合复位钢针内固定术
1245	D07儿童骨科、骨盆外科	2022-01-11	2022-01-25	3186259	曾爱莲	女	73Y	股骨粗隆间骨折	慢性胃炎;泌尿道感染;糖尿病;下肢静脉血栓形成;糜烂性胃炎;脑梗死后遗症;脂肪肝;后天性肾囊肿;高血压病	治愈	孔建中	孔建中	陈墨川	股骨骨折闭合复位钢针内固定术
1246	D07儿童骨科、骨盆外科	2022-01-22	2022-01-26	3186421	陈康	男	10Y	取除骨折内固定装置		其他	张敬东	李玉安	闫广奎	桡骨内固定物取出术
1247	D07儿童骨科、骨盆外科	2022-01-20	2022-01-26	3186486	黄孝必	男	51Y	骨折治疗后恢复期	前列腺结石	其他	翁益民	翁益民	王特	桡骨内固定物取出术
1248	D07儿童骨科、骨盆外科	2022-01-22	2022-01-26	3186518	郑涵静	女	3Y	取除骨折内固定装置		其他	张敬东	易先宏	闫广奎	股骨内固定物取出术
1249	D07儿童骨科、骨盆外科	2022-01-17	2022-01-26	3186524	赖家久	男	82Y	股骨颈骨折	后天性肾囊肿;下肢动脉粥样硬化	治愈	孔建中	孔建中	陈墨川	髋关节松解术;髋关节滑膜切除术;全髋关节表面置换术
1250	D07儿童骨科、骨盆外科	2022-01-13	2022-01-26	3186550	施金友	男	53Y	胫骨下端骨折	前列腺结石;后天性肾囊肿;肾结石;腓骨骨折累及踝关节	治愈	孔建中	孔建中	陈墨川	胫骨骨折切开复位钢板内固定术;踝关节骨折切开复位钢板内固定术
1251	D07儿童骨科、骨盆外科	2022-01-16	2022-01-26	3186804	张岳花	女	80Y	股骨颈骨折	高血压病;骨折治疗后恢复期;下肢动脉粥样硬化	治愈	翁益民	翁益民	王特	人工股骨头置换术
1252	D07儿童骨科、骨盆外科	2022-01-25	2022-01-27	3186907	侯艾可	女	8Y	肱骨髁上骨折		好转	张敬东	李玉安	闫广奎	肱骨骨折闭合复位钢针内固定术
1253	D07儿童骨科、骨盆外科	2022-01-22	2022-01-27	3186945	钱雪峰	男	47Y	内踝骨折	前列腺增生;胆囊息肉;前列腺结石	治愈	孔建中	孔建中	陈墨川	踝关节骨折切开复位钢针内固定术;关节软骨修复术
1254	D07儿童骨科、骨盆外科	2022-01-24	2022-01-27	3186951	周金香	女	61Y	取除骨折内固定装置	2型糖尿病;脂肪肝	其他	孔建中	孔建中	陈墨川	跖骨内固定物取出术
1255	D07儿童骨科、骨盆外科	2022-01-20	2022-01-28	3187262	胡宝琴	女	46Y	桡骨下端骨折	上肢关节和韧带脱位、扭伤和劳损	好转	翁益民	翁益民	王特	副韧带修补术;关节软骨修复术;桡骨骨折切开复位钢针内固定术
1256	D07儿童骨科、骨盆外科	2022-01-24	2022-01-29	3187263	林美华	女	61Y	胸椎骨折	陈旧性腰椎骨折	治愈	翁益民	翁益民	王特	胸椎骨折球囊扩张成形术
1257	D07儿童骨科、骨盆外科	2022-01-20	2022-01-29	3187278	郑德芬	女	54Y	双踝骨折		治愈	孔建中	孔建中	方文来	踝关节骨折切开复位钢板内固定术
1258	D07儿童骨科、骨盆外科	2022-01-20	2022-01-29	3187341	刘春莲	女	76Y	髌骨骨折	高血压病;2型糖尿病;脂肪肝;后天性肾囊肿;肝囊肿;Ⅰ度房室传导阻滞	好转	孔建中	孔建中	陈墨川	髌骨骨折切开复位螺钉内固定术;股四头肌成形术;关节软骨修复术
1259	D07儿童骨科、骨盆外科	2022-01-25	2022-01-29	3187361	黄睿泽	男	5Y	取除骨折内固定装置		其他	张敬东	李玉安	闫广奎	股骨内固定物取出术
1260	D07儿童骨科、骨盆外科	2022-01-22	2022-01-29	3187364	朱书耀	男	9Y	肱骨髁上骨折	前臂正中神经损伤;前臂桡神经损伤	治愈	张敬东	易先宏	闫广奎	肱骨骨折闭合复位钢针内固定术
1261	D07儿童骨科、骨盆外科	2022-01-23	2022-01-29	3187378	陈思序	男	4Y	蒙特贾骨折脱位	前臂桡神经损伤	治愈	张敬东	易先宏	闫广奎	石膏绷带固定;尺骨骨折闭合复位术
1262	D07儿童骨科、骨盆外科	2022-01-25	2022-01-29	3187382	韩若晴	女	1Y	指骨骨折	腕和手水平特指手指伸肌和肌腱损伤;开放性手部损伤;特指手指指神经损伤	治愈	张敬东	李玉安	闫广奎	指骨骨折闭合复位钢针内固定术;皮肤和皮下坏死组织切除清创术;手部肌腱成形术
1263	D07儿童骨科、骨盆外科	2022-01-09	2022-01-29	3187392	潘笋芽	女	73Y	尺骨上端骨折	肘关节脱位;上肢关节和韧带脱位、扭伤和劳损;桡骨骨折;尺骨茎突骨折;闭合性胫骨平台骨折;膝关节十字韧带扭伤;膝内侧半月板损伤;骨软骨炎;膝关节积液;下肢浅表损伤;眶骨骨折;玻璃体混浊;肺结节;脂肪肝;膝关节副韧带扭伤	治愈	翁益民	翁益民	王特	尺骨骨折切开复位钢针内固定术;肘关节韧带修补术;肘关节成形术;桡骨外固定架固定术;桡骨骨折闭合复位螺钉内固定术
1264	D07儿童骨科、骨盆外科	2022-01-25	2022-01-29	3187398	陈政源	男	12Y	取除骨折内固定装置		其他	张敬东	李玉安	闫广奎	瘢痕松解术;桡骨内固定物取出术;尺骨内固定物取出术
1265	D07儿童骨科、骨盆外科	2022-01-22	2022-01-30	3187787	余泽道	男	11Y	胫腓骨闭合性骨折		治愈	张敬东	李玉安	闫广奎	胫骨骨折切开复位钢板内固定术
1266	D07儿童骨科、骨盆外科	2022-01-22	2022-01-30	3187791	彭博文	男	6Y	肱骨外髁骨折		治愈	张敬东	易先宏	闫广奎	上肢关节囊缝合术;关节软骨修复术;肱骨骨折切开复位钢针内固定术
1267	D07儿童骨科、骨盆外科	2022-01-25	2022-01-30	3187793	班宇航	男	3Y	股骨颈骨折		治愈	张敬东	李玉安	闫广奎	股骨骨折闭合复位钢针内固定术
1268	D07儿童骨科、骨盆外科	2022-01-20	2022-01-30	3187802	黄方正	男	40Y	股骨干骨折	特指手术后状态	治愈	孔建中	孔建中	陈墨川	股骨骨折闭合复位钢针内固定术
1269	D07儿童骨科、骨盆外科	2022-01-22	2022-01-30	3187814	徐恩倍	男	3Y	股骨干骨折		治愈	张敬东	李玉安	闫广奎	股骨骨折闭合复位钢针内固定术
1270	D07儿童骨科、骨盆外科	2022-01-17	2022-01-30	3187816	林珠琴	女	42Y	股骨颈骨折		好转	孔建中	孔建中	方文来	股骨骨折闭合复位钢针内固定术
1271	D07儿童骨科、骨盆外科	2022-01-20	2022-01-30	3187818	曾月英	女	61Y	锁骨骨折	糖尿病;胆囊结石;肝囊肿	治愈	孔建中	孔建中	方文来	锁骨骨折切开复位钢针内固定术
1272	D07儿童骨科、骨盆外科	2022-01-26	2022-01-30	3187824	王学雁	男	40Y	骨折治疗后恢复期		其他	翁益民	翁益民	王特	股骨内固定物取出术
1273	D07儿童骨科、骨盆外科	2022-01-23	2022-01-30	3187826	阮善菊	女	46Y	取除骨折内固定装置		其他	翁益民	翁益民	王特	胫骨内固定物取出术
1274	D07儿童骨科、骨盆外科	2022-01-24	2022-01-30	3187990	曾显智	男	60Y	取除骨折内固定装置	脂肪肝;后天性肾囊肿;前列腺结石	其他	翁益民	翁益民	王特	腓骨内固定物取出术;胫骨内固定物取出术
1275	D07儿童骨科、骨盆外科	2022-01-27	2022-01-31	3188299	朱凯诚	男	13Y	取除骨折内固定装置		其他	张敬东	李玉安	闫广奎	锁骨内固定物取出术
1276	D07儿童骨科、骨盆外科	2022-01-26	2022-01-31	3188300	庄元赫	男	3Y	取除骨折内固定装置		其他	张敬东	易先宏	闫广奎	股骨内固定物取出术
1277	D07儿童骨科、骨盆外科	2025-11-26	2022-02-01	3188525	邵子涛	男	6Y	胫腓骨下端骨折	创伤性硬膜外出血;头皮血肿;开放性足损伤;开放性特指趾骨骨折;跖骨骨折;顶骨骨折;耻骨骨折	治愈	张敬东	易先宏	闫广奎	跖骨骨折切开复位钢针内固定术;皮肤和皮下坏死组织切除清创术;创面负压封闭引流[VSD];跗跖关节融合术;胫骨外固定架固定术;同种皮肤移植术;胫骨骨折切开复位钢针内固定术
1278	D07儿童骨科、骨盆外科	2022-01-28	2022-02-01	3188679	金晨媛	女	2Y	肱骨外髁骨折		治愈	张敬东	李玉安	王伟	肱骨骨折切开复位钢针内固定术
1279	D07儿童骨科、骨盆外科	2022-01-22	2022-02-01	3188683	王恒桃	男	53Y	股骨粗隆间骨折	桡骨下端骨折;特指手术后状态;血小板减少症;后天性肾囊肿	治愈	孔建中	孔建中	陈墨川	股骨骨折闭合复位钢针内固定术
1280	D07儿童骨科、骨盆外科	2022-01-29	2022-02-01	3188690	陈冠初	男	3Y	取除骨折内固定装置		其他	张敬东	李玉安	闫广奎	股骨内固定物取出术
1281	D07儿童骨科、骨盆外科	2022-01-29	2022-02-01	3188696	杨敬轩	男	2Y	取除骨折内固定装置		其他	张敬东	李玉安	闫广奎	股骨内固定物取出术
1282	D07儿童骨科、骨盆外科	2022-01-29	2022-02-01	3188779	黄文隆	男	7Y	取除骨折内固定装置		其他	张敬东	李玉安	闫广奎	股骨内固定物取出术
1283	D07儿童骨科、骨盆外科	2022-01-29	2022-02-01	3188784	陈雅妮	女	7Y	取除骨折内固定装置		其他	张敬东	李玉安	闫广奎	胫骨内固定物取出术
1284	D07儿童骨科、骨盆外科	2022-01-30	2022-02-01	3188867	王浩阳	男	7Y	取除骨折内固定装置		其他	张敬东	易先宏	闫广奎	股骨内固定物取出术
1285	D07儿童骨科、骨盆外科	2022-01-29	2022-02-01	3188904	刘晨昂	男	5Y	骨折治疗后随诊检查	呼吸道感染	其他	张敬东	李玉安	王伟
1286	D07儿童骨科、骨盆外科	2022-01-23	2022-02-02	3189028	邢春花	女	65Y	耻骨骨折	股骨颈骨折;高血压病	治愈	孔建中	孔建中	陈墨川	髂骨骨折切开复位螺钉内固定术;股骨骨折闭合复位钢针内固定术;骨盆骨折切开复位钢板内固定术
1287	D07儿童骨科、骨盆外科	2022-01-26	2022-02-02	3189029	喻清生	男	41Y	外踝骨折	后天性肾囊肿	治愈	孔建中	孔建中	方文来	关节软骨修复术;踝关节骨折切开复位钢针内固定术
1288	D07儿童骨科、骨盆外科	2022-01-30	2022-02-02	3189031	卢成煌	男	13Y	取除骨折内固定装置		其他	张敬东	闫广奎	方明桥	瘢痕松解术;桡骨内固定物取出术
1289	D07儿童骨科、骨盆外科	2022-01-26	2022-02-02	3189126	金学英	女	71Y	肱骨外科颈骨折	高血压病;脂肪肝;胆囊结石;肝囊肿	治愈	孔建中	孔建中	方文来	肱骨骨折切开复位钢针内固定术
1290	D07儿童骨科、骨盆外科	2022-01-31	2022-02-02	3189169	朱俊睿	男	9Y	取除骨折内固定装置	哮喘	其他	翁益民	翁益民	王特	胫骨内固定物取出术
1291	D07儿童骨科、骨盆外科	2022-01-21	2022-02-02	3189253	黄秀兰	女	85Y	股骨粗隆间骨折	肺部感染;胸腔积液;心包积液;食管裂孔疝;脾囊肿;后天性肾囊肿	治愈	翁益民	翁益民	王特	股骨骨折闭合复位钢针内固定术
1292	D07儿童骨科、骨盆外科	2022-01-30	2022-02-03	3189424	陈文博	男	6Y	胫骨骨折		治愈	张敬东	易先宏	闫广奎	胫骨骨折闭合复位螺钉内固定术
1293	D07儿童骨科、骨盆外科	2022-01-16	2022-02-03	3189608	汪丐秋	男	52Y	开放性胫腓骨干骨折		好转	翁益民	翁益民	王特	创面负压封闭引流[VSD];腓骨骨折闭合复位钢针内固定术;胫骨骨折切开复位钢针内固定术
1294	D07儿童骨科、骨盆外科	2022-02-02	2022-02-05	3189920	赵柳叶	女	103Y	股骨颈骨折		未愈	翁益民	翁益民	王特
1295	D07儿童骨科、骨盆外科	2022-02-01	2022-02-05	3189954	章梓豪	男	1Y	指骨骨折	特指单个手指部分或完全切断	治愈	张敬东	易先宏	闫广奎	皮肤和皮下坏死组织切除清创术;指骨骨折切开复位钢针内固定术
1296	D07儿童骨科、骨盆外科	2022-01-18	2022-02-05	3190126	胡陈伟	男	17Y	胫骨骨干骨折		治愈	孔建中	孔建中	陈墨川	胫骨骨折切开复位钢针内固定术
1297	D07儿童骨科、骨盆外科	2022-01-26	2022-02-05	3190238	于亚柱	男	40Y	股骨颈骨折		好转	黄俊武	王鉴顺	蔡乐益	股骨骨折闭合复位钢针内固定术
1298	D07儿童骨科、骨盆外科	2022-01-12	2022-02-05	3190279	陈建宁	男	55Y	闭合性胫骨平台骨折	肝功能不全;肺结节;肝囊肿	好转	孔建中	孔建中	陈墨川	胫骨骨折切开复位钢针内固定术;胫骨植骨术;关节软骨修复术
1299	D07儿童骨科、骨盆外科	2022-01-31	2022-02-06	3190494	徐暄育	男	10Y	外踝骨折		治愈	张敬东	易先宏	毛诚晃	踝关节骨折切开复位钢针内固定术
1300	D07儿童骨科、骨盆外科	2022-02-02	2022-02-06	3190691	董自富	男	54Y	股骨颈骨折	下肢静脉血栓形成;脂肪肝;后天性肾囊肿;肝囊肿	治愈	孔建中	孔建中	陈墨川	股骨骨折闭合复位钢针内固定术
1301	D07儿童骨科、骨盆外科	2022-02-01	2022-02-07	3190873	郑长泉	男	10Y	取除骨折内固定装置		其他	张敬东	易先宏	闫广奎	股骨内固定物取出术
1302	D07儿童骨科、骨盆外科	2022-02-02	2022-02-07	3190878	陈宣余	男	12Y	取除骨折内固定装置		其他	张敬东	易先宏	闫广奎	股骨内固定物取出术
1303	D07儿童骨科、骨盆外科	2022-02-02	2022-02-07	3190890	刘玉	男	30Y	腓骨骨折	小腿水平腓侧肌群肌腱损伤;小腿水平腓神经损伤;小腿水平腓侧肌群肌肉损伤;小腿水平后部肌群特指肌肉和肌腱损伤;小腿水平前部肌群肌腱损伤;小腿水平前部肌群肌肉损伤	好转	孔建中	孔建中	陈墨川	肌腱、血管、神经探查术;腓神经缝合术;下肢肌腱缝合术;胫前肌缝合术
1304	D07儿童骨科、骨盆外科	2022-01-30	2022-02-07	3190896	黄建豪	男	4Y	股骨干骨折		治愈	张敬东	易先宏	毛诚晃	股骨骨折切开复位钢针内固定术
1305	D07儿童骨科、骨盆外科	2022-01-25	2022-02-07	3190901	章鋆	男	12Y	股骨干骨折	特指手术后状态	治愈	张敬东	易先宏	毛诚晃	股骨骨折切开复位钢针内固定术
1306	D07儿童骨科、骨盆外科	2022-02-01	2022-02-07	3190911	柯以沫	女	2Y	肱骨外髁骨折		治愈	张敬东	李玉安	闫广奎	肱骨骨折切开复位钢针内固定术
1307	D07儿童骨科、骨盆外科	2022-01-25	2022-02-08	3191229	王泉兴	男	44Y	胫骨骨折		治愈	孔建中	孔建中	方文来	胫骨植骨术;胫骨骨折切开复位钢针内固定术
1308	D07儿童骨科、骨盆外科	2022-02-05	2022-02-08	3191369	黄玉俊	男	14Y	取除骨折内固定装置		其他	张敬东	易先宏	毛诚晃	桡骨内固定物取出术
1309	D07儿童骨科、骨盆外科	2022-02-06	2022-02-09	3191658	郑铭柏	男	9Y	取除骨折内固定装置		其他	张敬东	易先宏	闫广奎	胫骨内固定物取出术
1310	D07儿童骨科、骨盆外科	2022-02-05	2022-02-09	3191748	王德玮	男	7Y	取除骨折内固定装置		其他	张敬东	易先宏	毛诚晃	跗骨内固定物取出术
1311	D07儿童骨科、骨盆外科	2022-02-05	2022-02-09	3191754	李心宇	男	7Y	取除骨折内固定装置		其他	张敬东	易先宏	毛诚晃	胫骨内固定物取出术
1312	D07儿童骨科、骨盆外科	2022-02-06	2022-02-09	3191771	苏明憬	男	8Y	取除骨折内固定装置		其他	张敬东	李玉安	方明桥	肱骨内固定物取出术
1313	D07儿童骨科、骨盆外科	2022-02-05	2022-02-09	3191779	陈子成	男	11Y	取除骨折内固定装置		其他	张敬东	李玉安	闫广奎	尺骨内固定物取出术
1314	D07儿童骨科、骨盆外科	2022-02-02	2022-02-09	3191786	方浩然	男	13Y	取除骨折内固定装置		其他	张敬东	李玉安	方明桥	股骨内固定物取出术
1315	D07儿童骨科、骨盆外科	2022-02-01	2022-02-09	3191905	陈浩	男	10Y	桡骨颈骨折		好转	翁益民	翁益民	王特	桡骨骨折切开复位钢针内固定术
1316	D07儿童骨科、骨盆外科	2022-01-24	2022-02-09	3191955	鲁珍掀	男	54Y	股骨粗隆下骨折	脂肪肝;骰骨骨折;跖趾关节脱位;三踝骨折;跖骨骨折;腰椎骨折;中度贫血;下肢静脉血栓形成	治愈	孔建中	孔建中	陈墨川	踝关节骨折切开复位钢针内固定术;股骨骨折闭合复位钢针内固定术;跗跖关节融合术
1317	D07儿童骨科、骨盆外科	2022-02-05	2022-02-10	3192162	陈振来	男	9Y	取除骨折内固定装置		其他	张敬东	易先宏	闫广奎	股骨内固定物取出术
1318	D07儿童骨科、骨盆外科	2022-02-05	2022-02-10	3192177	姚家乐	男	13Y	取除骨折内固定装置		其他	张敬东	李玉安	闫广奎	锁骨内固定物取出术
1319	D07儿童骨科、骨盆外科	2022-02-07	2022-02-11	3192510	王明烽	男	14Y	取除骨折内固定装置	陈旧性腰椎骨折	其他	张敬东	易先宏	方明桥	跟骨内固定物取出术
1320	D07儿童骨科、骨盆外科	2022-02-07	2022-02-11	3192512	蔡国盛	男	7Y	取除骨折内固定装置		其他	张敬东	李玉安	方明桥	股骨内固定物取出术
1321	D07儿童骨科、骨盆外科	2022-02-06	2022-02-11	3192555	潘文静	女	11Y	取除骨折内固定装置		其他	张敬东	易先宏	毛诚晃	瘢痕松解术;尺骨内固定物取出术
1322	D07儿童骨科、骨盆外科	2022-02-05	2022-02-11	3192557	周阳政	男	12Y	取除骨折内固定装置		其他	张敬东	易先宏	毛诚晃	瘢痕松解术;股骨内固定物取出术
1323	D07儿童骨科、骨盆外科	2022-02-08	2022-02-11	3192562	钱海强	男	11Y	取除骨折内固定装置		其他	张敬东	易先宏	毛诚晃	股骨内固定物取出术
1324	D07儿童骨科、骨盆外科	2022-02-06	2022-02-11	3192569	李守善	男	31Y	取除骨折内固定装置	脂肪肝	其他	翁益民	翁益民	王特	踝关节内固定物取出术
1325	D07儿童骨科、骨盆外科	2022-02-03	2022-02-11	3192572	叶佳红	女	24Y	指骨骨折	陈旧性手指骨折;肝囊肿;肾结石;指关节脱位;腕和手水平特指手指伸肌和肌腱损伤	治愈	翁益民	翁益民	王特	手部肌腱成形术;指骨骨折切开复位钢针内固定术
1326	D07儿童骨科、骨盆外科	2022-02-07	2022-02-11	3192633	胡恩俊	男	9Y	取除骨折内固定装置		其他	张敬东	易先宏	王伟	胫骨内固定物取出术
1327	D07儿童骨科、骨盆外科	2022-01-29	2022-02-11	3192668	鲍金秀	女	42Y	腓骨骨折	腰骶部脊柱骨折;下背部软组织损伤;特指手术后状态;肩锁关节脱位;头皮血肿;胸腔积液;肋骨骨折;气胸	治愈	翁益民	翁益民	王特	腓骨骨折闭合复位钢针内固定术;肩锁关节脱位切开复位内固定术
1328	D07儿童骨科、骨盆外科	2022-02-01	2022-02-12	3192901	陈杏月	女	81Y	股骨颈骨折	阿尔茨海默病;主动脉瓣疾患;二尖瓣返流	治愈	孔建中	孔建中	方文来	人工股骨头置换术
1329	D07儿童骨科、骨盆外科	2022-02-07	2022-02-12	3192905	吴正浩	男	11Y	鹰嘴骨折	桡骨颈骨折;肘关节脱位	治愈	张敬东	李玉安	闫广奎	关节软骨修复术;桡骨骨折切开复位钢针内固定术;尺骨骨折切开复位钢针内固定术
1330	D07儿童骨科、骨盆外科	2022-02-07	2022-02-12	3192998	刘乐	男	14Y	取除骨折内固定装置		其他	张敬东	易先宏	闫广奎	桡骨内固定物取出术
1331	D07儿童骨科、骨盆外科	2022-02-09	2022-02-12	3193080	阮冬英	女	56Y	跟骨骨折	跖骨骨折;下肢动脉粥样硬化	未愈	翁益民	翁益民	王特
1332	D07儿童骨科、骨盆外科	2022-01-27	2022-02-12	3193099	温少溶	男	63Y	胫腓骨干骨折	距骨骨折;手术后皮肤坏死;二尖瓣返流;脂肪肝;前列腺增生	治愈	孔建中	孔建中	陈墨川	胫骨植骨术;胫骨骨折切开复位钢板内固定术
1333	D07儿童骨科、骨盆外科	2022-01-30	2022-02-12	3193329	胡乃文	男	66Y	股骨粗隆间骨折	高血压病;糖尿病;痛风;脂肪肝;后天性肾囊肿;前列腺增生;下肢动脉粥样硬化;前列腺结石;肾超声检查异常	治愈	翁益民	翁益民	王特	股骨骨折闭合复位钢针内固定术
1334	D07儿童骨科、骨盆外科	2022-02-10	2022-02-13	3193566	陈优优	女	2Y	开放性指骨骨折	特指单个手指部分或完全切断	治愈	张敬东	易先宏	方明桥	皮肤和皮下坏死组织切除清创术;指骨骨折切开复位钢针内固定术
1335	D07儿童骨科、骨盆外科	2022-01-31	2022-02-13	3193569	傅香连	女	65Y	桡骨头骨折	肱骨内髁骨折;指关节脱位;皮肤挫伤;骨质疏松;尺骨上端骨折;肱骨外髁骨折;肘关节脱位	治愈	孔建中	孔建中	陈墨川	皮肤和皮下坏死组织切除清创术;指关节脱位切开复位术;桡骨骨折切开复位钢针内固定术;肘关节成形术;副韧带修补术;手部肌腱成形术;关节软骨修复术;肌腱、血管、神经探查术
1336	D07儿童骨科、骨盆外科	2022-02-02	2022-02-13	3193598	陈凤英	女	82Y	闭合性胫骨平台骨折	高血压病;肾结石	治愈	孔建中	孔建中	方文来	胫骨植骨术;膝关节半月板成形术;关节软骨修复术;胫骨骨折切开复位钢针内固定术
1337	D07儿童骨科、骨盆外科	2022-02-10	2022-02-13	3193600	杨峻哲	男	4Y	开放性指骨骨折	开放性手部损伤	治愈	张敬东	易先宏	闫广奎	肌腱、血管、神经探查术;皮肤和皮下坏死组织切除清创术;指骨骨折切开复位钢针内固定术
1338	D07儿童骨科、骨盆外科	2022-02-09	2022-02-13	3193606	熊兴富	男	13Y	取除骨折内固定装置		其他	张敬东	易先宏	毛诚晃	胫骨内固定物取出术
1339	D07儿童骨科、骨盆外科	2022-02-09	2022-02-13	3193609	林渝钧	女	13Y	取除骨折内固定装置		其他	张敬东	易先宏	闫广奎	尺骨内固定物取出术
1340	D07儿童骨科、骨盆外科	2022-02-09	2022-02-13	3193622	吴信杰	男	13Y	取除骨折内固定装置		其他	张敬东	李玉安	方明桥	肱骨内固定物取出术
1341	D07儿童骨科、骨盆外科	2022-01-28	2022-02-13	3193680	熊延达	男	45Y	股骨粗隆间骨折	肱骨髁间骨折;脂肪肝;前列腺结石	治愈	翁益民	翁益民	王特	肱骨骨折切开复位钢针内固定术;股骨骨折闭合复位钢针内固定术
1342	D07儿童骨科、骨盆外科	2022-01-29	2022-02-13	3193788	吴复兴	男	79Y	股骨粗隆间骨折	肺部感染;肺气肿;2型糖尿病;脂肪肝;多发性肝囊肿;胆囊结石;肾结石;前列腺增生;间质性肺病;前列腺结石	治愈	孔建中	孔建中	陈墨川	股骨骨折闭合复位钢针内固定术
1343	D07儿童骨科、骨盆外科	2022-01-29	2022-02-14	3194063	章吓毯	男	36Y	股骨干骨折	髌骨骨折;颞骨骨折;肝功能不全	治愈	孔建中	孔建中	陈墨川	关节软骨修复术;股四头肌成形术;髌骨骨折切开复位螺钉内固定术;股骨植骨术;股骨骨折切开复位钢板内固定术
1344	D07儿童骨科、骨盆外科	2022-02-05	2022-02-14	3194082	缪陈影	女	19Y	外踝骨折	室性早搏	治愈	孔建中	孔建中	陈墨川	踝关节融合术;副韧带修补术;踝关节骨折切开复位钢针内固定术
1345	D07儿童骨科、骨盆外科	2022-01-31	2022-02-14	3194150	沈艳	男	31Y	开放性胫腓骨干骨折	眼睑和眼周区特指浅表损伤;头皮血肿;肺挫伤;脂肪肝;肾结石	治愈	翁益民	翁益民	王特	腓骨骨折闭合复位钢针内固定术;胫骨外固定架固定术;胫骨骨折切开复位钢针内固定术
1346	D07儿童骨科、骨盆外科	2022-02-06	2022-02-14	3194234	张建义	男	36Y	髌骨骨折	前列腺结石;肝回声不均;肝血管瘤	治愈	孔建中	孔建中	方文来	股四头肌成形术;关节软骨修复术;髌骨骨折切开复位螺钉内固定术
1347	D07儿童骨科、骨盆外科	2022-02-06	2022-02-14	3194236	张碎花	女	72Y	股骨颈骨折	2型糖尿病;脂肪肝;骨质疏松	治愈	孔建中	孔建中	陈墨川	髋关节滑膜切除术;全髋关节表面置换术;髋关节囊松解术
1348	D07儿童骨科、骨盆外科	2022-02-07	2022-02-14	3194238	何兰	女	25Y	肱骨内髁骨折	尺骨骨折;后天性肾囊肿	治愈	孔建中	孔建中	方文来	滑囊病损切除术;肱骨骨折切开复位钢针内固定术
1349	D07儿童骨科、骨盆外科	2022-02-09	2022-02-14	3194251	潘毅昊	男	6Y	取除骨折内固定装置		其他	张敬东	易先宏	毛诚晃	尺骨内固定物取出术
1350	D07儿童骨科、骨盆外科	2022-02-09	2022-02-14	3194252	林泽涵	男	5Y	肱骨外髁骨折		治愈	张敬东	易先宏	闫广奎	肱骨骨折切开复位钢针内固定术
1351	D07儿童骨科、骨盆外科	2022-02-09	2022-02-14	3194264	徐予安	男	5Y	取除骨折内固定装置		其他	张敬东	易先宏	闫广奎	胫骨内固定物取出术
1352	D07儿童骨科、骨盆外科	2022-02-06	2022-02-14	3194298	柯元姣	女	52Y	股骨颈骨折	慢性乙型病毒性肝炎	治愈	孔建中	孔建中	方文来	股骨骨折闭合复位钢针内固定术
1353	D07儿童骨科、骨盆外科	2022-02-13	2022-02-14	3194345	陈辉	男	11Y	锁骨骨折	特指趾骨骨折;踝和足特指浅表损伤	好转	张敬东	易先宏	方明桥
1354	D07儿童骨科、骨盆外科	2022-02-09	2022-02-14	3194351	刘润秋	男	8Y	取除骨折内固定装置		其他	张敬东	李玉安	闫广奎	股骨内固定物取出术
1355	D07儿童骨科、骨盆外科	2022-02-06	2022-02-14	3194486	陈玉香	女	83Y	股骨粗隆间骨折	髂骨骨折;高血压病;2型糖尿病;后天性肾囊肿;胆囊结石	好转	孔建中	孔建中	陈墨川	股骨骨折闭合复位钢针内固定术
1356	D07儿童骨科、骨盆外科	2022-02-06	2022-02-14	3194492	谢菊弟	女	78Y	股骨颈骨折	高血压病;腰椎间盘突出;下肢动脉粥样硬化	好转	孔建中	孔建中	陈墨川	全髋关节表面置换术
1357	D07儿童骨科、骨盆外科	2022-02-12	2022-02-15	3194690	徐浩宇	男	12Y	取除骨折内固定装置		其他	张敬东	易先宏	毛诚晃	瘢痕松解术;尺骨内固定物取出术
1358	D07儿童骨科、骨盆外科	2022-02-12	2022-02-15	3194692	洛各尔者	男	4Y	取除骨折内固定装置		其他	张敬东	易先宏	毛诚晃	股骨内固定物取出术
1359	D07儿童骨科、骨盆外科	2022-02-10	2022-02-15	3194708	高维洁	女	8Y	经大转子骨折	多处浅表损伤;特指手术后状态;股骨颈骨折;肺挫伤	治愈	张敬东	易先宏	闫广奎	股骨骨折闭合复位钢针内固定术
1360	D07儿童骨科、骨盆外科	2022-02-12	2022-02-15	3194792	雷文婷	女	9Y	取除骨折内固定装置		其他	张敬东	易先宏	闫广奎	肱骨内固定物取出术
1361	D07儿童骨科、骨盆外科	2022-02-11	2022-02-17	3194993	周宏涛	男	4Y	胫腓骨干骨折		治愈	张敬东	李玉安	闫广奎	胫骨骨折闭合复位螺钉内固定术
1362	D07儿童骨科、骨盆外科	2022-02-08	2022-02-18	3195174	程立英	女	77Y	股骨颈骨折	高血压病;后天性肾囊肿;房性早搏;肥厚型非梗阻性心肌病	好转	孔建中	孔建中	陈墨川	髋关节镜下滑膜切除术;全髋关节表面置换术;髋关节松解术
1363	D07儿童骨科、骨盆外科	2022-02-09	2022-02-18	3195178	董美菊	女	43Y	胫骨骨干骨折		治愈	孔建中	孔建中	陈墨川	胫骨植骨术;胫骨骨折切开复位钢针内固定术
1364	D07儿童骨科、骨盆外科	2022-02-13	2022-02-18	3195180	蒋铃	女	54Y	肱骨上端骨折	肩关节脱位	治愈	孔建中	孔建中	方文来	肱骨骨折切开复位钢针内固定术;肱骨植骨术;肩袖修补术
1365	D07儿童骨科、骨盆外科	2022-02-05	2022-02-18	3195183	陈建宁	男	55Y	手术后膝关节感染	肝功能异常;骨折治疗后恢复期	好转	孔建中	孔建中	陈墨川
1366	D07儿童骨科、骨盆外科	2022-02-13	2022-02-19	3195278	柯华藤	男	60Y	多发性肋骨骨折	特指手术随诊医疗;骨折治疗后随诊检查;创伤性气胸;创伤性胸腔积液;肝囊肿	好转	翁益民	翁益民	王特
1367	D07儿童骨科、骨盆外科	2022-02-18	2022-02-20	3195458	郑庆柱	男	73Y	插入矫形外科关节假体后骨折	气管内异物;呼吸衰竭;帕金森病	未愈	孔建中	孔建中	陈墨川
1368	D07儿童骨科、骨盆外科	2022-02-20	2022-02-21	3195560	林思辰	女	1Y	肱骨髁上骨折	上肢神经损伤	好转	张敬东	易先宏	闫广奎	肱骨骨折闭合复位钢针内固定术
1369	D07儿童骨科、骨盆外科	2022-02-09	2022-02-22	3195643	徐永平	男	59Y	胫腓骨闭合性骨折	二尖瓣返流;脂肪肝	好转	孔建中	孔建中	方文来	胫骨骨折切开复位钢板内固定术;腓骨骨折切开复位钢板内固定术
1370	D07儿童骨科、骨盆外科	2022-02-07	2022-02-22	3195782	施阿兴	男	86Y	股骨粗隆下骨折	2型糖尿病;冠状动脉介入治疗后随诊检查;心房颤动;脂肪肝;后天性肾囊肿;前列腺增生;心脏瓣膜病;下肢动脉粥样硬化	好转	孔建中	孔建中	陈墨川	股骨骨折闭合复位钢针内固定术
1371	D07儿童骨科、骨盆外科	2022-02-08	2022-02-23	3195889	朱高宇	男	9Y	股骨粗隆下骨折		好转	张敬东	李玉安	闫广奎	股骨骨折切开复位钢针内固定术
1372	D07儿童骨科、骨盆外科	2022-02-16	2022-02-23	3195998	曾华新	男	12Y	胫骨骨折		好转	张敬东	易先宏	闫广奎
1373	D07儿童骨科、骨盆外科	2022-02-12	2022-02-24	3196169	兰博	男	7Y	股骨干骨折		治愈	张敬东	易先宏	闫广奎	股骨骨折切开复位钢针内固定术
1374	D07儿童骨科、骨盆外科	2022-02-16	2022-02-24	3196181	陈烁	男	5Y	肱骨外髁骨折		治愈	张敬东	李玉安	闫广奎	关节软骨修复术;肱骨骨折切开复位钢针内固定术
1375	D07儿童骨科、骨盆外科	2022-02-22	2022-02-24	3196191	刘俊飞	男	12Y	锁骨骨折		好转	张敬东	易先宏	方明桥
1376	D07儿童骨科、骨盆外科	2022-02-12	2022-02-24	3196354	陈云鹤	男	74Y	股骨颈骨折	高血压病;毁损肺;左前分支传导阻滞;前列腺增生;陈旧性肺结核	好转	孔建中	孔建中	陈墨川	人工股骨头置换术
1377	D07儿童骨科、骨盆外科	2022-02-22	2022-02-25	3196471	郑昕圻	男	7Y	取除骨折内固定装置		其他	张敬东	易先宏	方明桥	胫骨内固定物取出术
1378	D07儿童骨科、骨盆外科	2022-02-20	2022-02-26	3196629	陈浩东	男	5Y	肱骨外髁骨折		治愈	张敬东	易先宏	闫广奎	肱骨骨折切开复位钢针内固定术
1379	D07儿童骨科、骨盆外科	2022-02-23	2022-02-26	3196631	蔡睿珉	女	11Y	取除骨折内固定装置	腓骨骨折	其他	张敬东	李玉安	毛诚晃	腓骨内固定物取出术
1380	D07儿童骨科、骨盆外科	2022-02-23	2022-02-26	3196633	黄天成	男	8Y	取除骨折内固定装置		其他	张敬东	李玉安	闫广奎	股骨内固定物取出术
1381	D07儿童骨科、骨盆外科	2022-02-16	2022-02-26	3196635	叶天乐	男	2Y	股骨干骨折		好转	张敬东	李玉安	闫广奎	股骨骨折切开复位钢针内固定术
1382	D07儿童骨科、骨盆外科	2022-02-15	2022-02-26	3196639	国惠宣	女	2Y	股骨干骨折		治愈	张敬东	李玉安	闫广奎	股骨骨折切开复位钢针内固定术
1383	D07儿童骨科、骨盆外科	2022-02-16	2022-02-26	3196641	黄文睿	男	5Y	股骨粗隆下骨折		好转	张敬东	易先宏	闫广奎	股骨骨折闭合复位钢针内固定术
1384	D07儿童骨科、骨盆外科	2022-02-16	2022-02-26	3196642	林毅	男	6Y	股骨骨折		好转	张敬东	易先宏	闫广奎	股骨骨折闭合复位钢针内固定术
1385	D07儿童骨科、骨盆外科	2022-02-10	2022-02-26	3196889	吕秋莲	女	65Y	闭合性胫骨平台骨折	多发性肋骨骨折;液气胸;胸腔积液;下肢动脉粥样硬化;静脉栓塞和血栓形成;原发性单侧膝关节病;脂肪肝;肝和胆道影像检查异常;尺骨桡骨闭合性骨折;腓骨骨折;耻骨骨折;骨质疏松	治愈	翁益民	翁益民	王特	胫骨骨折切开复位钢板内固定术;尺骨骨折切开复位钢板内固定术;桡骨骨折切开复位钢板内固定术;胫骨植骨术
1386	D07儿童骨科、骨盆外科	2022-02-18	2022-02-27	3197026	陈龙年	男	9Y	胫腓骨下端骨折		治愈	张敬东	李玉安	闫广奎	胫骨骨折闭合复位术
1387	D07儿童骨科、骨盆外科	2022-02-19	2022-02-27	3197063	董美菊	女	72Y	肱骨上端骨折	骨质疏松;高血压病	治愈	孔建中	孔建中	陈墨川	肱骨植骨术;肩袖修补术;肱骨骨折切开复位钢针内固定术
1388	D07儿童骨科、骨盆外科	2022-02-16	2022-02-27	3197068	王潇婷	女	14Y	胫腓骨下端骨折		治愈	张敬东	李玉安	闫广奎	关节软骨修复术;腓骨骨折切开复位钢针内固定术;胫骨骨折切开复位钢针内固定术
1389	D07儿童骨科、骨盆外科	2022-02-23	2022-02-27	3197072	程柠檬	女	9Y	取除骨折内固定装置		其他	张敬东	易先宏	闫广奎	股骨内固定物取出术
1390	D07儿童骨科、骨盆外科	2022-02-14	2022-02-27	3197083	虞美钗	女	68Y	股骨粗隆间骨折	急性上呼吸道感染;心脏瓣膜病;脂肪肝	治愈	孔建中	孔建中	陈墨川	股骨骨折闭合复位钢针内固定术
1391	D07儿童骨科、骨盆外科	2022-02-23	2022-02-27	3197089	张雨嘉	女	3Y	多发性指骨骨折	上肢皮肤裂伤;急性上呼吸道感染	治愈	张敬东	李玉安	方明桥	皮肤和皮下坏死组织切除清创术;指骨骨折闭合复位钢针内固定术
1392	D07儿童骨科、骨盆外科	2022-02-18	2022-02-28	3197504	黄玉芬	女	49Y	闭合性胫骨平台骨折	腓骨骨折;2型糖尿病	治愈	孔建中	孔建中	陈墨川	关节软骨修复术;胫骨植骨术;胫骨骨折切开复位钢针内固定术
1393	D07儿童骨科、骨盆外科	2022-02-25	2022-02-28	3197507	唐雨	男	9Y	取除骨折内固定装置		其他	张敬东	易先宏	闫广奎	胫骨内固定物取出术
1394	D07儿童骨科、骨盆外科	2022-02-25	2022-02-28	3197509	徐志康	男	13Y	取除骨折内固定装置		其他	张敬东	易先宏	闫广奎	胫骨内固定物取出术
1395	D07儿童骨科、骨盆外科	2022-02-24	2022-02-28	3197511	宋阔阔	男	9Y	取除骨折内固定装置		其他	张敬东	易先宏	闫广奎	股骨内固定物取出术;尺骨内固定物取出术
1396	D07儿童骨科、骨盆外科	2022-01-30	2022-02-28	3197668	张金义	男	52Y	闭合性胫骨平台骨折	前列腺结石;坏疽;胫腓骨干骨折;后天性肾囊肿;前列腺增生;房性早搏;下肢动脉粥样硬化	治愈	孔建中	孔建中	陈墨川	皮肤和皮下坏死组织切除清创术;关节软骨修复术;胫骨骨折切开复位钢板内固定术;胫骨骨折闭合复位螺钉内固定术;创面负压封闭引流[VSD]
1397	D07儿童骨科、骨盆外科	2022-02-23	2022-03-01	3197865	潘琦	男	13Y	取除骨折内固定装置		其他	张敬东	李玉安	闫广奎	股骨内固定物取出术
1398	D07儿童骨科、骨盆外科	2022-02-24	2022-03-01	3197866	吴必松	男	1Y	开放性指骨骨折	腕和手水平特指手指伸肌和肌腱损伤	好转	张敬东	李玉安	闫广奎	手部肌腱成形术;指骨骨折切开复位钢针内固定术;皮肤和皮下坏死组织切除清创术
1399	D07儿童骨科、骨盆外科	2022-02-13	2022-03-01	3197876	金三媛	女	91Y	股骨粗隆间骨折	泌尿道感染;房性早搏;退行性主动脉瓣疾患;老年性心脏病;下肢动脉粥样硬化;下肢动脉硬化闭塞症;呼吸道感染	治愈	孔建中	孔建中	陈墨川	股骨骨折闭合复位钢针内固定术
1400	D07儿童骨科、骨盆外科	2022-02-22	2022-03-01	3197881	胡显仲	男	40Y	胫腓骨闭合性骨折	肾结石;后天性肾囊肿;前列腺结石;脂肪肝;踝关节脱位;胫腓韧带远端撕裂	治愈	孔建中	孔建中	方文来	胫骨骨折切开复位钢板内固定术;距腓韧带缝合修补术
1401	D07儿童骨科、骨盆外科	2022-02-18	2022-03-01	3197896	林春兰	女	81Y	股骨粗隆下骨折	下肢动脉粥样硬化;后天性肾囊肿;高血压病	治愈	孔建中	孔建中	陈墨川	股骨骨折闭合复位钢针内固定术
1402	D07儿童骨科、骨盆外科	2022-02-12	2022-03-01	3198050	黄沄龙	男	78Y	股骨颈骨折	下肢动脉硬化闭塞症;后天性肾囊肿;肝囊肿;肺部感染;高血压病;肾衰竭	治愈	孔建中	孔建中	陈墨川	人工股骨头置换术;髋关节松解术
1403	D07儿童骨科、骨盆外科	2022-02-24	2022-03-02	3198197	李锐涵	女	4Y	蒙特贾骨折脱位	前臂桡神经损伤	好转	张敬东	易先宏	闫广奎	尺桡关节脱位切开复位术;韧带修补术;上肢关节囊缝合术
1404	D07儿童骨科、骨盆外科	2022-02-26	2022-03-02	3198202	夏皓轩	男	3Y	取除骨折内固定装置		其他	张敬东	李玉安	方明桥	胫骨内固定物取出术
1405	D07儿童骨科、骨盆外科	2022-02-22	2022-03-02	3198449	陈春梅	女	72Y	尺骨茎突骨折	高血压病;2型糖尿病;脂肪肝;下肢动脉粥样硬化	治愈	孔建中	孔建中	方文来	肘关节成形术;尺骨骨折切开复位钢针内固定术
1406	D07儿童骨科、骨盆外科	2022-02-14	2022-03-03	3198515	郑峰	男	48Y	胫骨下端骨折	胆囊息肉;外踝骨折	治愈	翁益民	翁益民	王特	踝关节骨折切开复位钢板内固定术;胫骨骨折切开复位钢板内固定术
1407	D07儿童骨科、骨盆外科	2022-02-24	2022-03-03	3198546	周腾捷	男	2Y	股骨干骨折		治愈	张敬东	易先宏	闫广奎	股骨骨折闭合复位钢针内固定术
1408	D07儿童骨科、骨盆外科	2022-02-26	2022-03-03	3198592	叶诚成	男	11Y	取除骨折内固定装置		其他	张敬东	李玉安	方明桥	跟骨内固定物取出术
1409	D07儿童骨科、骨盆外科	2022-02-18	2022-03-03	3198619	韩秋华	女	80Y	肱骨髁间骨折	骨质疏松;后天性肾囊肿;心脏瓣膜病;肺动脉高压轻度	治愈	孔建中	孔建中	陈墨川	尺神经探查术;肱骨骨折切开复位钢针内固定术;肘关节成形术;关节软骨修复术
1410	D07儿童骨科、骨盆外科	2022-03-01	2022-03-05	3199180	黄益博	男	4Y	肱骨髁上骨折		治愈	张敬东	李玉安	闫广奎	肱骨骨折闭合复位钢针内固定术
1411	D07儿童骨科、骨盆外科	2022-02-28	2022-03-05	3199184	梁芝珍	女	3Y	取除骨折内固定装置		其他	张敬东	易先宏	闫广奎	股骨内固定物取出术
1412	D07儿童骨科、骨盆外科	2022-02-14	2022-03-06	3199573	陈久通	男	80Y	股骨粗隆间骨折	肺气肿;肺恶性肿瘤;胆囊结石;下肢动脉粥样硬化;肺肿物;高血压病;锁骨骨折;肺部感染	治愈	翁益民	翁益民	王特	锁骨骨折切开复位钢针内固定术;股骨骨折闭合复位钢针内固定术
1413	D07儿童骨科、骨盆外科	2022-02-22	2022-03-06	3199574	程长海	男	41Y	股骨颈骨折	脂肪肝	治愈	翁益民	翁益民	王特	股骨骨折闭合复位钢针内固定术
1414	D07儿童骨科、骨盆外科	2022-02-26	2022-03-06	3199575	黄秀琴	女	66Y	经大转子骨折	多处浅表损伤;冠状动脉介入治疗后随诊检查;高血压病;2型糖尿病;肺结节;下肢动脉粥样硬化	治愈	孔建中	陈墨川	陈墨川	股骨骨折切开复位钢针内固定术
1415	D07儿童骨科、骨盆外科	2022-02-18	2022-03-06	3199577	范茹	女	33Y	三踝骨折	肾结石;下肢关节和韧带脱位、扭伤和劳损	治愈	孔建中	孔建中	陈墨川	关节软骨修复术;踝关节融合术;踝关节骨折切开复位钢针内固定术
1416	D07儿童骨科、骨盆外科	2022-02-26	2022-03-06	3199788	苏松彩	女	90Y	股骨粗隆间骨折	高血压病;Ⅲ度房室传导阻滞;泌尿道感染;后天性肾囊肿;具有心脏起搏器	治愈	孔建中	孔建中	陈墨川	股骨骨折闭合复位钢针内固定术
1417	D07儿童骨科、骨盆外科	2022-03-03	2022-03-07	3200073	章渊朝	男	11Y	取除骨折内固定装置		其他	张敬东	李玉安	方明桥	桡骨内固定物取出术
1418	D07儿童骨科、骨盆外科	2022-02-26	2022-03-07	3200137	易景华	男	92Y	股骨粗隆间骨折	下肢动脉粥样硬化;胆囊息肉;心脏瓣膜病;心房颤动;心功能不全;肺气肿	治愈	孔建中	孔建中	陈墨川	股骨骨折闭合复位钢针内固定术
1419	D07儿童骨科、骨盆外科	2022-02-25	2022-03-07	3200141	丁锡富	男	79Y	股骨粗隆间骨折	肺部感染;阿尔茨海默病;肝囊肿;胆囊结石;后天性肾囊肿;膀胱炎;前列腺增生;下肢动脉粥样硬化;间质性肺病	治愈	孔建中	孔建中	陈墨川	股骨骨折闭合复位钢针内固定术
1420	D07儿童骨科、骨盆外科	2022-02-25	2022-03-07	3200375	杨国强	男	58Y	闭合性胫骨平台骨折	胆囊结石;下肢动脉粥样硬化;特指心脏传导阻滞;完全性左束支传导阻滞;心脏瓣膜病	治愈	孔建中	孔建中	方文来	关节软骨修复术;胫骨骨折切开复位钢板内固定术;膝关节半月板成形术;胫骨植骨术
1421	D07儿童骨科、骨盆外科	2022-02-27	2022-03-08	3200504	郑江琴	女	42Y	指骨良性肿瘤	胃-食管撕裂-出血综合征;糜烂性胃炎;结肠息肉;病理性骨折	治愈	孔建中	孔建中	陈墨川	指骨骨折切开复位钢针内固定术
1422	D07儿童骨科、骨盆外科	2022-03-05	2022-03-08	3200505	刘允	男	4Y	肱骨髁上骨折	前臂神经损伤	治愈	张敬东	李玉安	闫广奎	肱骨骨折闭合复位钢针内固定术
1423	D07儿童骨科、骨盆外科	2022-02-25	2022-03-08	3200508	叶孝凡	男	4Y	创伤性骨筋膜室综合征	掌骨骨折;浅表损伤	治愈	张敬东	易先宏	闫广奎	创面负压封闭引流[VSD];皮肤和皮下坏死组织切除清创术;筋膜间隙切开减压术
1424	D07儿童骨科、骨盆外科	2022-03-04	2022-03-09	3200819	李雨轩	男	11Y	开放性尺骨桡骨远端骨折	前臂尺神经损伤	治愈	张敬东	易先宏	闫广奎	皮肤和皮下坏死组织切除清创术;桡骨骨折闭合复位钢针内固定术
1425	D07儿童骨科、骨盆外科	2022-03-02	2022-03-09	3200821	缪程程	男	2Y	股骨粗隆下骨折		好转	张敬东	李玉安	方明桥	股骨骨折闭合复位钢针内固定术
1426	D07儿童骨科、骨盆外科	2022-03-06	2022-03-09	3200824	蒋文丽	女	11Y	肱骨髁上骨折		治愈	张敬东	李玉安	方明桥	肱骨骨折闭合复位钢针内固定术
1427	D07儿童骨科、骨盆外科	2022-03-05	2022-03-09	3200840	刘潇	男	6Y	取除骨折内固定装置	骨折治疗后恢复期	其他	张敬东	易先宏	闫广奎	肱骨内固定物取出术
1428	D07儿童骨科、骨盆外科	2022-02-26	2022-03-09	3201128	施爱兰	女	75Y	股骨粗隆间骨折	腰椎滑脱;上消化道出血;人工膝关节;特指手术后状态;肺结节;下肢动脉粥样硬化;脂肪肝	治愈	翁益民	翁益民	王特	股骨骨折闭合复位钢针内固定术
1429	D07儿童骨科、骨盆外科	2022-03-01	2022-03-10	3201226	张家顺	男	3Y	股骨干骨折		好转	张敬东	易先宏	闫广奎	股骨骨折闭合复位钢针内固定术
1430	D07儿童骨科、骨盆外科	2022-03-06	2022-03-10	3201251	叶轩铭	男	14Y	取除骨折内固定装置		其他	张敬东	易先宏	闫广奎	尺骨内固定物取出术
1431	D07儿童骨科、骨盆外科	2022-02-26	2022-03-10	3201275	金玉香	女	80Y	肱骨干骨折	高血压病;2型糖尿病;下肢动脉粥样硬化	治愈	翁益民	翁益民	王特	肱骨骨折切开复位钢针内固定术
1432	D07儿童骨科、骨盆外科	2022-03-03	2022-03-10	3201303	闫伟	女	24Y	取除骨折内固定装置		其他	翁益民	翁益民	王特	尺骨内固定物取出术;桡骨内固定物取出术
1433	D07儿童骨科、骨盆外科	2022-03-01	2022-03-10	3201313	杨秋花	女	78Y	股骨颈骨折	2型糖尿病;肺结节;脂肪肝;后天性肾囊肿;心脏瓣膜病;下肢动脉粥样硬化	治愈	孔建中	孔建中	陈墨川	全髋关节表面置换术;髋关节松解术;髋关节滑膜切除术
1434	D07儿童骨科、骨盆外科	2022-03-03	2022-03-10	3201316	林丽雪	女	81Y	肱骨上端骨折	肋骨骨折;乙型肝炎小三阳;后天性肾囊肿	治愈	孔建中	孔建中	陈墨川	肱骨骨折闭合复位钢针内固定术
1435	D07儿童骨科、骨盆外科	2022-02-28	2022-03-10	3201455	胡小虎	男	47Y	闭合性胫骨平台骨折	脂肪肝;肝囊肿;后天性肾囊肿	治愈	孔建中	孔建中	陈墨川	胫骨植骨术;关节软骨修复术;胫骨骨折切开复位钢针内固定术
1436	D07儿童骨科、骨盆外科	2022-03-06	2022-03-10	3201460	尤修瓦	男	43Y	拇趾骨折	下肢静脉曲张;趾关节脱位;高血压病;脂肪肝;脾大	治愈	翁益民	翁益民	王特	关节软骨修复术;趾关节脱位闭合复位术;趾骨骨折闭合复位钢针内固定术
1437	D07儿童骨科、骨盆外科	2022-03-08	2022-03-12	3202530	吴明阳	男	3Y	取除骨折内固定装置		其他	张敬东	易先宏	闫广奎	股骨内固定物取出术
1438	D07儿童骨科、骨盆外科	2022-03-05	2022-03-12	3202551	黄会浩	男	2Y	肱骨外髁骨折		好转	张敬东	易先宏	闫广奎	关节软骨修复术;肱骨骨折切开复位钢针内固定术
1439	D07儿童骨科、骨盆外科	2022-03-07	2022-03-12	3202580	陈彦睿	男	3Y	肱骨外髁骨折		治愈	张敬东	易先宏	闫广奎	关节软骨修复术;肱骨骨折切开复位钢针内固定术
1440	D07儿童骨科、骨盆外科	2022-03-05	2022-03-12	3202585	王鸿涛	男	6Y	肱骨外髁骨折		好转	张敬东	李玉安	闫广奎	肱骨骨折切开复位钢针内固定术
1441	D07儿童骨科、骨盆外科	2022-03-08	2022-03-12	3202586	陶梦佳	女	5Y	取除骨折内固定装置		其他	张敬东	易先宏	闫广奎	股骨内固定物取出术
1442	D07儿童骨科、骨盆外科	2022-03-08	2022-03-12	3202592	刘晨昂	男	5Y	取除骨折内固定装置		其他	张敬东	李玉安	方明桥	股骨内固定物取出术
1443	D07儿童骨科、骨盆外科	2022-03-03	2022-03-13	3202587	袁家斌	男	4Y	股骨干骨折	头皮血肿;面部软组织挫伤	好转	张敬东	李玉安	闫广奎	股骨骨折切开复位钢针内固定术
1444	D07儿童骨科、骨盆外科	2022-03-06	2022-03-13	3202210	胡方财	男	52Y	髌骨骨折	前列腺结石;胆囊胆固醇沉着症;高血压病;2型糖尿病;肾结石;后天性肾囊肿;前列腺增生	治愈	孔建中	孔建中	陈墨川	股四头肌成形术;髌骨骨折切开复位螺钉内固定术;关节软骨修复术
1445	D07儿童骨科、骨盆外科	2022-02-28	2022-03-13	3202243	朱鸿辰	男	13Y	骨折畸形愈合	脂肪肝;窦性心动过速	治愈	孔建中	孔建中	陈墨川	腓骨钢板内固定术;胫骨钢板内固定术;腓骨截骨术;胫骨截骨术
1446	D07儿童骨科、骨盆外科	2022-03-07	2022-03-14	3202607	张文博	男	15Y	双踝骨折	胫腓韧带远端撕裂	治愈	孔建中	孔建中	陈墨川	踝关节融合术;踝关节骨折切开复位钢板内固定术
1447	D07儿童骨科、骨盆外科	2022-03-07	2022-03-14	3202614	林仁华	女	79Y	肱骨上端骨折	骨质疏松;高血压病;脂肪肝	治愈	孔建中	孔建中	陈墨川	肩袖修补术;肱骨骨折切开复位钢针内固定术
1448	D07儿童骨科、骨盆外科	2022-02-26	2022-03-14	3202621	杨显丹	女	40Y	锁骨骨折	髌骨骨折;头皮血肿;眼挫伤;特指手术后状态;创伤性牙折断;脱髓鞘性脑病	治愈	翁益民	翁益民	王特	髌骨骨折闭合复位空心钉内固定术;锁骨骨折闭合复位钢针内固定术
1449	D07儿童骨科、骨盆外科	2022-03-05	2022-03-14	3202727	南孝奶	女	77Y	股骨粗隆间骨折	脂肪肝;下肢动脉粥样硬化;中度贫血	治愈	孔建中	孔建中	陈墨川	股骨植骨术;股骨骨折切开复位钢针内固定术
1450	D07儿童骨科、骨盆外科	2022-02-21	2022-03-14	3202870	江美兰	女	60Y	趾伸肌腱断裂	外踝骨折;楔状骨骨折(足);内踝骨折;跖骨骨折;拇趾骨折;足部皮肤撕裂伤;小腿水平腓神经损伤;跟骨骨折;骰骨骨折	治愈	翁益民	翁益民	王特	石膏绷带固定;足肌腱成形术;皮肤和皮下坏死组织切除清创术;腓神经缝合术;创面负压封闭引流[VSD]
1451	D07儿童骨科、骨盆外科	2022-03-02	2022-03-14	3202872	韩的娥	男	43Y	髂骨骨折	锁骨骨折;肋骨骨折;乙型病毒性肝炎;耻骨骨折	治愈	孔建中	孔建中	陈墨川	锁骨骨折切开复位钢板内固定术;骨盆外固定架固定术;髂骨骨折切开复位钢针内固定术
1452	D07儿童骨科、骨盆外科	2022-02-27	2022-03-15	3202968	李昱	男	3Y	开放性趾外伤伴趾甲损坏	跖骨骨折	治愈	张敬东	易先宏	闫广奎	皮瓣修整术;甲成形术;皮肤和皮下坏死组织切除清创术
1453	D07儿童骨科、骨盆外科	2022-03-06	2022-03-15	3202975	吴家乐	男	12Y	取除骨折内固定装置	骨折治疗后恢复期;成骨不全;胫骨骨折	其他	张敬东	易先宏	闫广奎	尺骨内固定物取出术
1454	D07儿童骨科、骨盆外科	2022-02-06	2022-03-15	3202978	林孝楷	男	49Y	闭合性胫骨平台骨折	创伤后伤口感染;2型糖尿病	治愈	孔建中	孔建中	陈墨川	创面负压封闭引流[VSD];胫骨植骨术;水泥间隔物置入术;皮肤和皮下坏死组织切除清创术;胫骨骨折切开复位钢板内固定术;关节软骨修复术
1455	D07儿童骨科、骨盆外科	2022-03-06	2022-03-15	3202983	林宪华	女	66Y	胫骨骨折累及踝关节	小腿开放性损伤;2型糖尿病;下肢动脉粥样硬化;下肢静脉血栓形成	治愈	翁益民	翁益民	王特	踝关节骨折切开复位钢板内固定术;胫骨植骨术;胫骨骨折切开复位钢板内固定术
1456	D07儿童骨科、骨盆外科	2022-03-13	2022-03-15	3202996	陈雅轩	女	3Y	肱骨髁上骨折		治愈	张敬东	李玉安	闫广奎	肱骨骨折闭合复位钢针内固定术
1457	D07儿童骨科、骨盆外科	2022-02-18	2022-03-15	3203099	陈林	男	75Y	闭合性胫骨平台骨折	高血压病;2型糖尿病;窦性心动过速;下肢动脉粥样硬化;脂肪肝;肾结石;前列腺结石;前列腺增生;房性早搏;锁骨骨折;特指手术后状态;肋骨骨折	治愈	孔建中	孔建中	陈墨川	锁骨骨折切开复位钢板内固定术;膝半月板部分切除术;关节软骨修复术;胫骨骨折切开复位钢板内固定术
1458	D07儿童骨科、骨盆外科	2022-03-10	2022-03-16	3203282	钱李梅	女	74Y	胸椎骨折	腰椎滑脱;桡骨下端骨折;椎间盘膨隆	治愈	毛方敏	盛孙仁	盛孙仁	胸椎骨折球囊扩张成形术
1459	D07儿童骨科、骨盆外科	2022-03-10	2022-03-16	3203286	林晨希	男	5Y	胫腓骨干骨折		好转	张敬东	易先宏	闫广奎	胫骨骨折切开复位钢针内固定术
1460	D07儿童骨科、骨盆外科	2022-03-13	2022-03-16	3203354	毛智宸	男	3Y	取除骨折内固定装置		其他	张敬东	易先宏	闫广奎	股骨内固定物取出术
1461	D07儿童骨科、骨盆外科	2022-03-10	2022-03-16	3203380	张春霞	女	51Y	股骨颈骨折		治愈	孔建中	孔建中	陈墨川	股骨骨折闭合复位钢针内固定术
1462	D07儿童骨科、骨盆外科	2022-03-09	2022-03-16	3203384	陈飞鹏	男	9Y	闭合性胫骨平台骨折		治愈	张敬东	李玉安	闫广奎	关节软骨修复术;膝关节镜下胫骨髁间棘骨折固定术
1463	D07儿童骨科、骨盆外科	2022-03-06	2022-03-16	3203573	蔡娇妹	女	92Y	股骨粗隆间骨折	高血压病;2型糖尿病;下肢动脉粥样硬化;下肢动脉血栓形成;后天性肾囊肿;完全性右束支传导阻滞;肺栓塞;冠状动脉粥样硬化性心脏病	治愈	翁益民	翁益民	王特	股骨骨折闭合复位钢针内固定术
1464	D07儿童骨科、骨盆外科	2022-03-09	2022-03-16	3203639	白永劳	男	55Y	取除骨折内固定装置	脂肪肝;肝钙化灶;胆囊息肉;前列腺结石	其他	翁益民	翁益民	王特	胫骨内固定物取出术
1465	D07儿童骨科、骨盆外科	2022-03-14	2022-03-17	3203732	佟子荀	男	6Y	肱骨髁上骨折		好转	张敬东	李玉安	闫广奎	肱骨骨折闭合复位钢针内固定术
1466	D07儿童骨科、骨盆外科	2022-03-13	2022-03-17	3203804	黄家兴	男	13Y	肱骨髁上骨折	桡骨下端骨折;前臂桡神经损伤	好转	张敬东	李玉安	闫广奎	肱骨骨折闭合复位钢针内固定术
1467	D07儿童骨科、骨盆外科	2022-02-18	2022-03-18	3204041	张秀华	女	80Y	股骨粗隆间骨折	心房颤动;循环系统操作后疾患	治愈	孔建中	孔建中	陈墨川	股骨骨折切开复位钢板内固定术;股骨植骨术
1468	D07儿童骨科、骨盆外科	2022-03-10	2022-03-19	3203700	姜皓轩	男	2Y	开放性拇指骨折	开放性手指损伤不伴指甲损害	治愈	张敬东	李玉安	闫广奎	皮肤和皮下坏死组织切除清创术;指骨骨折闭合复位钢针内固定术
1469	D07儿童骨科、骨盆外科	2022-03-12	2022-03-19	3204155	温佳月	女	5Y	肱骨外髁骨折	先天性尺桡关节融合	治愈	张敬东	李玉安	方明桥	肱骨骨折切开复位钢针内固定术
1470	D07儿童骨科、骨盆外科	2022-03-10	2022-03-19	3204242	王浩丞	男	7Y	股骨粗隆下骨折		治愈	张敬东	李玉安	闫广奎	股骨骨折切开复位钢针内固定术
1471	D07儿童骨科、骨盆外科	2022-03-12	2022-03-19	3204270	叶晓伟	男	38Y	跟骨骨折	骰骨骨折;脂肪肝;肝囊肿;后天性肾囊肿	未愈	孔建中	孔建中	陈墨川
1472	D07儿童骨科、骨盆外科	2022-03-14	2022-03-19	3204276	胡泽浩	男	2Y	肱骨髁上骨折	上臂神经损伤	治愈	张敬东	李玉安	闫广奎	肱骨骨折切开复位钢针内固定术
1473	D07儿童骨科、骨盆外科	2022-03-12	2022-03-19	3204285	陈扬	男	12Y	锁骨骨折		治愈	张敬东	李玉安	闫广奎	锁骨骨折闭合复位钢针内固定术
1474	D07儿童骨科、骨盆外科	2022-03-08	2022-03-19	3204318	徐列夫	男	44Y	髌骨骨折	脂肪肝;肝功能异常	治愈	孔建中	孔建中	陈墨川	髌骨骨折切开复位螺钉内固定术;关节软骨修复术
1475	D07儿童骨科、骨盆外科	2022-02-26	2022-03-19	3204378	夏知萍	女	54Y	胫腓骨下端骨折	高血压病;胆囊息肉	治愈	翁益民	翁益民	王特	胫骨骨折切开复位钢针内固定术
1476	D07儿童骨科、骨盆外科	2022-03-14	2022-03-19	3204609	陈作义	男	76Y	跖骨骨折	创伤性多个足趾切断;高血压病;肾结石;前列腺增生;下肢动脉粥样硬化;房性早搏;足部皮肤撕裂伤;前列腺结石;跖骨脱位	治愈	孔建中	孔建中	陈墨川	皮肤和皮下坏死组织切除清创术;肌腱、血管、神经探查术;跗跖关节脱位切开复位术;创面负压封闭引流[VSD]
1477	D07儿童骨科、骨盆外科	2022-03-15	2022-03-20	3204703	赵纯付	女	52Y	取除骨折内固定装置	肝囊肿;胆囊息肉;后天性肾囊肿	其他	翁益民	翁益民	王特	胫骨内固定物取出术
1478	D07儿童骨科、骨盆外科	2022-03-09	2022-03-20	3204705	钱飞鹏	男	66Y	开放性足损伤	开放性特指趾骨骨折;下肢静脉血栓形成;肝囊肿;后天性肾囊肿	治愈	孔建中	孔建中	陈墨川	创面负压封闭引流[VSD];皮肤和皮下坏死组织切除清创术
1479	D07儿童骨科、骨盆外科	2022-03-15	2022-03-20	3204987	陈金女	女	80Y	股骨颈骨折	高血压病;2型糖尿病;脑卒中后遗症;脂肪肝	治愈	孔建中	孔建中	陈墨川	髋关节松解术;人工股骨头置换术
1480	D07儿童骨科、骨盆外科	2022-03-16	2022-03-21	3205077	缪桂萍	女	2Y	取除骨折内固定装置		其他	张敬东	李玉安	闫广奎	股骨内固定物取出术
1481	D07儿童骨科、骨盆外科	2022-03-10	2022-03-21	3205160	王让修	男	53Y	股骨髁骨折	高血压病;下肢动脉粥样硬化;脂肪肝;后天性肾囊肿;窦性心律失常;室性早搏;陈旧性下壁心肌梗死;特指手术后状态	治愈	翁益民	翁益民	王特	股骨骨折切开复位钢针内固定术
1482	D07儿童骨科、骨盆外科	2022-03-14	2022-03-22	3205516	黄松桃	男	87Y	股骨粗隆间骨折	中度贫血;肾衰竭;房性早搏;肝囊肿;后天性肾囊肿;前列腺结石;下肢动脉粥样硬化;股骨颈骨折	治愈	孔建中	孔建中	陈墨川	股骨骨折切开复位钢针内固定术
1483	D07儿童骨科、骨盆外科	2022-03-10	2022-03-22	3205541	李鸿涛	男	7Y	胫骨骨干骨折	特指手术后状态	治愈	张敬东	李玉安	闫广奎	胫骨骨折闭合复位螺钉内固定术
1484	D07儿童骨科、骨盆外科	2022-03-14	2022-03-22	3205648	袁忠勇	男	51Y	锁骨骨折	特指手术后状态;结肠损伤;肋骨骨折;鼻骨骨折;脂肪肝;下肢动脉粥样硬化;肺部阴影	治愈	翁益民	翁益民	王特	锁骨骨折闭合复位钢针内固定术
1485	D07儿童骨科、骨盆外科	2022-03-10	2022-03-22	3205765	黄秀兰	女	54Y	髂骨骨折	骶骨骨折;耻骨骨折;肝囊肿;后天性肾囊肿;脑膜瘤;肺结节	治愈	翁益民	翁益民	王特	骨盆外固定架固定术
1486	D07儿童骨科、骨盆外科	2022-03-18	2022-03-23	3205903	何启勋	男	9Y	开放性指骨骨折	开放性手部损伤;特指手指指神经损伤;尺骨桡骨远端骨折	治愈	张敬东	李玉安	闫广奎	石膏绷带固定;桡骨骨折闭合复位术;尺骨骨折闭合复位术;指骨骨折切开复位钢针内固定术
1487	D07儿童骨科、骨盆外科	2022-03-16	2022-03-23	3205906	陈蒋泽	男	15Y	尺骨桡骨远端骨折		治愈	张敬东	李玉安	闫广奎	桡骨骨骺分离闭合复位术;桡骨骨折闭合复位钢针内固定术;尺骨骨折切开复位钢针内固定术
1488	D07儿童骨科、骨盆外科	2022-03-10	2022-03-23	3205946	陈光成	男	46Y	肩胛骨骨折	耻骨骨折;特指趾骨骨折;肺挫伤;腰椎骨折;特指手术后状态;眶骨骨折;窦性心动过速;创伤性气胸;肋骨骨折	治愈	孔建中	孔建中	陈墨川	骨盆外固定架固定术;肩胛骨骨折切开复位钢板内固定术
1489	D07儿童骨科、骨盆外科	2022-03-14	2022-03-23	3205950	张步助	男	47Y	闭合性胫骨平台骨折	肩锁关节脱位	好转	孔建中	孔建中	陈墨川	胫骨植骨术;肩锁关节脱位切开复位内固定术;关节软骨修复术;胫骨骨折切开复位钢针内固定术
1490	D07儿童骨科、骨盆外科	2022-03-09	2022-03-23	3205953	李上樟	男	34Y	股骨下端骨折	鼻骨骨折	治愈	孔建中	孔建中	陈墨川	关节软骨修复术;股骨植骨术;股骨骨折切开复位钢针内固定术
1491	D07儿童骨科、骨盆外科	2022-02-26	2022-03-23	3205962	彭玉西	男	51Y	开放性胫腓骨下端骨折	跟骨骨折;肝囊肿;下肢动脉粥样硬化;下肢静脉血栓形成	治愈	孔建中	孔建中	陈墨川	胫骨骨折切开复位钢板内固定术;腓骨骨折切开复位钢板内固定术;关节软骨修复术;胫骨植骨术;跟骨结节牵引
1492	D07儿童骨科、骨盆外科	2022-03-14	2022-03-23	3206197	徐玉琴	女	63Y	锁骨骨折	头皮血肿;肝囊肿	治愈	翁益民	翁益民	王特	锁骨骨折闭合复位钢针内固定术
1493	D07儿童骨科、骨盆外科	2022-03-14	2022-03-24	3206343	杨美清	女	57Y	股骨粗隆间骨折	肾结石;二尖瓣返流	治愈	孔建中	陈墨川	陈墨川	股骨骨折闭合复位钢针内固定术
1494	D07儿童骨科、骨盆外科	2022-03-21	2022-03-24	3206554	方晟忠	男	9Y	取除骨折内固定装置		其他	张敬东	李玉安	方明桥	胫骨内固定物取出术
1495	D07儿童骨科、骨盆外科	2022-03-19	2022-03-26	3206868	揭嘉辉	男	6Y	胫骨骨干骨折		治愈	张敬东	李玉安	方明桥	胫骨骨折闭合复位髓内针内固定术
1496	D07儿童骨科、骨盆外科	2022-03-18	2022-03-26	3206874	徐卫杰	男	12Y	尺骨桡骨闭合性骨折		好转	张敬东	李玉安	闫广奎	桡骨骨折闭合复位髓内针内固定术;尺骨骨折闭合复位髓内针内固定术
1497	D07儿童骨科、骨盆外科	2022-03-18	2022-03-26	3206880	郑思翰	男	6Y	股骨颈骨折	特指手术后状态	治愈	张敬东	李玉安	闫广奎	股骨骨折闭合复位髓内针内固定术
1498	D07儿童骨科、骨盆外科	2022-03-16	2022-03-26	3206901	李桂莲	女	55Y	闭合性胫骨平台骨折	高血压病;下肢动脉粥样硬化;后天性肾囊肿;肝功能异常;胫骨上端骨折;半月板撕裂，近期的	治愈	孔建中	孔建中	陈墨川	膝关节半月板成形术;胫骨骨折切开复位钢板内固定术;胫骨植骨术;关节软骨修复术
1499	D07儿童骨科、骨盆外科	2022-03-15	2022-03-27	3207089	项纯萍	女	82Y	股骨粗隆间骨折	高血压病;2型糖尿病;脂肪肝;肾超声检查异常;特指肾盂积水;下肢特指深部脉管静脉炎和血栓性静脉炎	治愈	孔建中	陈墨川	陈墨川	股骨骨折闭合复位钢针内固定术
1500	D07儿童骨科、骨盆外科	2022-03-20	2022-03-27	3207286	杨银妹	女	67Y	取除骨折内固定装置	恶性肿瘤手术后随诊检查;脂肪肝;骨质疏松	其他	翁益民	翁益民	王特	肱骨内固定物取出术
1501	D07儿童骨科、骨盆外科	2022-03-21	2022-03-27	3207322	蔡年杰	男	12Y	尺骨桡骨闭合性骨折		好转	张敬东	易先宏	闫广奎	桡骨骨折闭合复位髓内针内固定术;尺骨骨折闭合复位髓内针内固定术
1502	D07儿童骨科、骨盆外科	2022-03-19	2022-03-27	3207357	卓记根	男	50Y	肱骨上端骨折	肩关节脱位;脂肪肝;后天性肾囊肿	治愈	翁益民	王特	王特	肩关节脱位闭合复位术;肱骨骨折切开复位钢针内固定术
1503	D07儿童骨科、骨盆外科	2022-03-24	2022-03-28	3207678	陈思豪	男	2Y	肱骨髁上骨折		治愈	张敬东	李玉安	闫广奎	肱骨骨折闭合复位钢针内固定术
1504	D07儿童骨科、骨盆外科	2022-03-24	2022-03-28	3207718	董宏盛	男	1Y	肱骨髁上骨折		好转	张敬东	毛诚晃	闫广奎	肱骨骨折闭合复位钢针内固定术
1505	D07儿童骨科、骨盆外科	2022-03-03	2022-03-28	3207786	张永盛	男	51Y	跖骨骨折	跟骨骨折;骰骨骨折;楔状骨骨折(足);下肢皮肤感染;手术后皮肤坏死	治愈	孔建中	孔建中	陈墨川	跟骨骨折切开复位钢针内固定术;楔骨骨折切开复位螺钉内固定术;跗跖关节脱位切开复位术;跖骨骨折切开复位钢针内固定术
1506	D07儿童骨科、骨盆外科	2022-03-15	2022-03-28	3207835	昌招	男	36Y	股骨粗隆下骨折	腰椎骨折;完全性右束支传导阻滞;脂肪肝;颈椎间盘突出	好转	翁益民	翁益民	王特	股骨骨折闭合复位钢针内固定术
1507	D07儿童骨科、骨盆外科	2022-03-26	2022-03-29	3208022	黄溪语	女	1Y	肱骨髁上骨折		好转	张敬东	易先宏	闫广奎	肱骨骨折闭合复位钢针内固定术
1508	D07儿童骨科、骨盆外科	2022-03-22	2022-03-29	3208185	徐苑弼	女	12Y	内踝骨折		治愈	张敬东	李玉安	方明桥	踝关节骨折闭合复位钢针内固定术
1509	D07儿童骨科、骨盆外科	2022-03-23	2022-03-29	3208187	李妍	女	5Y	股骨髁骨折	肺挫伤;腹水;创伤性气胸	治愈	张敬东	李玉安	闫广奎	股骨骨折闭合复位钢针内固定术
1510	D07儿童骨科、骨盆外科	2022-03-19	2022-03-29	3208348	叶树多	男	68Y	肩锁关节脱位	肋骨骨折;肺挫伤;高血压病;2型糖尿病;下肢动脉粥样硬化;脂肪肝;后天性肾囊肿	治愈	翁益民	翁益民	王特	肩锁关节脱位切开复位内固定术
1511	D07儿童骨科、骨盆外科	2022-03-14	2022-03-30	3208540	王家举	男	53Y	肱骨髁间骨折	尺骨上端骨折;特指手术后状态;胆囊息肉;脾大;前列腺增生;下肢动脉粥样硬化;肘关节扭伤	治愈	翁益民	翁益民	王特	副韧带修补术;肱骨骨折切开复位钢针内固定术
1512	D07儿童骨科、骨盆外科	2022-03-16	2022-03-30	3208543	黄伟聪	男	54Y	股骨粗隆下骨折	特指肾盂积水;高血压病;肾结石	治愈	翁益民	翁益民	王特	股骨骨折切开复位钢针内固定术
1513	D07儿童骨科、骨盆外科	2022-03-29	2022-03-30	3208654	陈秀清	女	76Y	肩关节脱位	高血压病;肱骨上端骨折	好转	翁益民	翁益民	王特	肩关节脱位闭合复位术
1514	D07儿童骨科、骨盆外科	2022-03-10	2022-03-30	3208677	陈佳兴	男	13Y	胫腓骨闭合性骨折		好转	张敬东	李玉安	闫广奎	胫骨骨折切开复位钢板内固定术
1515	D07儿童骨科、骨盆外科	2022-03-10	2022-03-30	3208807	郑显忠	男	55Y	胫腓骨下端骨折	特指手术后状态	治愈	翁益民	翁益民	王特	腓骨骨折切开复位钢板内固定术;胫骨外固定架固定术;胫骨骨折切开复位钢针内固定术
1516	D07儿童骨科、骨盆外科	2022-03-30	2022-03-31	3208880	林煊皓	男	5Y	肱骨髁上骨折		治愈	张敬东	李玉安	闫广奎	肱骨骨折闭合复位钢针内固定术
1517	D07儿童骨科、骨盆外科	2022-03-27	2022-03-31	3208890	孙嘉成	男	3Y	肱骨外髁骨折		治愈	张敬东	李玉安	方明桥	肱骨骨折切开复位钢针内固定术
1518	D07儿童骨科、骨盆外科	2022-03-26	2022-03-31	3208950	陈文卓	男	8Y	胫骨骨干骨折		治愈	张敬东	李玉安	闫广奎	胫骨骨折闭合复位螺钉内固定术
1519	D07儿童骨科、骨盆外科	2022-03-22	2022-03-31	3208960	陈碎妹	女	79Y	股骨粗隆间骨折	胸腔积液;心脏瓣膜病;下肢动脉粥样硬化;2型糖尿病;高血压病;肺动脉高压轻度	治愈	孔建中	孔建中	陈墨川	股骨骨折闭合复位钢针内固定术
1520	D07儿童骨科、骨盆外科	2022-03-19	2022-04-02	3209421	陈豪	男	4Y	股骨干骨折		治愈	张敬东	李玉安	方明桥	股骨骨折切开复位钢针内固定术
1521	D07儿童骨科、骨盆外科	2022-03-29	2022-04-02	3209436	李涛	男	5Y	肱骨外髁骨折		好转	张敬东	易先宏	闫广奎	关节软骨修复术;肱骨骨折切开复位钢针内固定术
1522	D07儿童骨科、骨盆外科	2022-03-28	2022-04-02	3209445	冯兴旺	男	6Y	肱骨外髁骨折		治愈	张敬东	李玉安	方明桥	关节软骨修复术;肱骨骨折切开复位钢针内固定术
1523	D07儿童骨科、骨盆外科	2022-03-27	2022-04-02	3209527	邵玉兰	女	77Y	股骨粗隆间骨折	退行性主动脉瓣疾患;下肢静脉血栓形成;2型糖尿病;高血压病	治愈	孔建中	陈墨川	方文来	股骨骨折闭合复位钢针内固定术
1524	D07儿童骨科、骨盆外科	2022-03-22	2022-04-02	3209732	胡苗国	男	28Y	股骨干骨折		好转	孔建中	孔建中	陈墨川	股骨骨折切开复位钢针内固定术
1525	D07儿童骨科、骨盆外科	2022-03-28	2022-04-02	3209745	陈宝祥	男	65Y	鹰嘴骨折	后天性肾囊肿;前列腺结石	治愈	孔建中	孔建中	陈墨川	尺骨骨折切开复位钢针内固定术;关节软骨修复术
1526	D07儿童骨科、骨盆外科	2022-03-28	2022-04-03	3209896	高黄婷	女	6Y	股骨干骨折		治愈	张敬东	李玉安	毛诚晃	股骨骨折闭合复位钢针内固定术
1527	D07儿童骨科、骨盆外科	2022-03-26	2022-04-03	3209897	林诗雅	女	4Y	股骨干骨折		治愈	张敬东	易先宏	闫广奎	股骨骨折切开复位钢针内固定术
1528	D07儿童骨科、骨盆外科	2022-03-14	2022-04-03	3209906	董宇昊	男	8Y	特指部位骨折不连接		好转	张敬东	易先宏	闫广奎	桡骨骨折切开复位钢板内固定术;桡骨植骨术
1529	D07儿童骨科、骨盆外科	2022-03-23	2022-04-03	3209929	王信哲	男	2Y	掌骨骨折		治愈	张敬东	易先宏	闫广奎	掌骨骨折切开复位钢针内固定术;创面负压封闭引流[VSD];皮肤和皮下坏死组织切除清创术
1530	D07儿童骨科、骨盆外科	2022-03-21	2022-04-03	3209951	潘素贞	女	32Y	胫腓骨干骨折		治愈	孔建中	孔建中	陈墨川	胫骨植骨术;胫骨骨折闭合复位髓内针内固定术
1531	D07儿童骨科、骨盆外科	2022-03-21	2022-04-03	3209964	厉月霞	女	84Y	股骨粗隆间骨折	下肢动脉粥样硬化;心脏瓣膜病;肝囊肿;后天性肾囊肿	好转	孔建中	孔建中	陈墨川	股骨骨折闭合复位钢针内固定术
1532	D07儿童骨科、骨盆外科	2022-03-22	2022-04-03	3210148	赵秀兰	女	64Y	髌骨骨折	下肢动脉粥样硬化;脂肪肝;特指手术后状态	好转	翁益民	翁益民	王特	髌骨骨折切开复位螺钉内固定术
1533	D07儿童骨科、骨盆外科	2022-03-27	2022-04-04	3210227	李冬英	女	80Y	股骨粗隆间骨折	下肢动脉粥样硬化;低钾血症;重度贫血	未愈	孔建中	陈墨川	陈墨川	股骨骨折切开复位钢针内固定术
1534	D07儿童骨科、骨盆外科	2022-03-31	2022-04-04	3210414	刘豪	男	12Y	尺骨桡骨远端骨折		治愈	张敬东	易先宏	闫广奎	尺骨骨折闭合复位钢针内固定术
1535	D07儿童骨科、骨盆外科	2022-03-22	2022-04-04	3210556	林志香	女	78Y	股骨颈骨折	肺结节;肺纤维化;下肢动脉粥样硬化	好转	翁益民	翁益民	王特	人工股骨头置换术
1536	D07儿童骨科、骨盆外科	2022-04-01	2022-04-05	3210710	高杰	男	11Y	尺骨桡骨远端骨折		治愈	张敬东	易先宏	闫广奎	尺骨骨折闭合复位钢针内固定术
1537	D07儿童骨科、骨盆外科	2022-04-03	2022-04-06	3210963	周晨羲	女	1Y	肱骨髁上骨折	上臂神经损伤	治愈	张敬东	李玉安	闫广奎	肱骨骨折闭合复位钢针内固定术
1538	D07儿童骨科、骨盆外科	2022-04-02	2022-04-06	3210982	吴嘉瑜	女	10Y	肱骨髁上骨折		好转	张敬东	易先宏	闫广奎	肱骨骨折闭合复位钢针内固定术
1539	D07儿童骨科、骨盆外科	2022-04-03	2022-04-06	3210995	杜鑫鑫	男	6Y	肱骨髁上骨折		治愈	张敬东	李玉安	闫广奎	肱骨骨折闭合复位钢针内固定术
1540	D07儿童骨科、骨盆外科	2022-04-04	2022-04-07	3211168	林诗淇	女	1Y	肱骨髁上骨折		治愈	张敬东	易先宏	闫广奎	肱骨骨折闭合复位钢针内固定术
1541	D07儿童骨科、骨盆外科	2022-03-24	2022-04-07	3211319	黄耀仪	女	12Y	三踝骨折		治愈	孔建中	翁益民	王特	关节软骨修复术;踝关节骨折切开复位钢针内固定术;踝关节融合术
1542	D07儿童骨科、骨盆外科	2022-03-26	2022-04-07	3211320	叶恩仁	男	64Y	股骨粗隆间骨折	高血压病;肾结石;腔隙性脑梗死;心脏瓣膜病;下肢动脉粥样硬化	治愈	孔建中	陈墨川	陈墨川	股骨骨折切开复位钢针内固定术;股骨骨折闭合复位钢针内固定术
1543	D07儿童骨科、骨盆外科	2022-03-31	2022-04-08	3211414	戴爱珍	女	59Y	肱骨上端骨折	多发性肝囊肿;后天性肾囊肿;肾钙化;脂肪肝;肝血管瘤	治愈	翁益民	翁益民	王特	肱骨骨折切开复位钢针内固定术
1544	D07儿童骨科、骨盆外科	2022-03-29	2022-04-08	3211429	方金莲	女	62Y	股骨颈骨折	心脏瓣膜病	好转	孔建中	陈墨川	方文来	股骨骨折闭合复位螺钉内固定术
1545	D07儿童骨科、骨盆外科	2022-04-02	2022-04-08	3211440	章家豪	男	7Y	尺骨桡骨远端骨折		治愈	张敬东	李玉安	毛诚晃	桡骨骨折闭合复位钢针内固定术
1546	D07儿童骨科、骨盆外科	2022-04-02	2022-04-08	3211497	周芷冉	女	2Y	股骨干骨折		治愈	张敬东	闫广奎	闫广奎	股骨骨折闭合复位钢针内固定术
1547	D07儿童骨科、骨盆外科	2022-04-04	2022-04-08	3211512	赵均校	男	6Y	跖骨骨折	踝和足浅表损伤	好转	张敬东	易先宏	闫广奎
1548	D07儿童骨科、骨盆外科	2022-04-01	2022-04-08	3211516	龚雨婷	女	7Y	开放性特指指骨骨折		治愈	张敬东	李玉安	方明桥	指骨骨折切开复位钢针内固定术;皮肤和皮下坏死组织切除清创术
1549	D07儿童骨科、骨盆外科	2022-03-30	2022-04-08	3211531	翁忠根	男	63Y	肩胛骨骨折	脾囊肿;腰椎骨折;外踝骨折;头皮裂伤;头皮血肿;髋臼骨折;多发性肋骨骨折;创伤性胸腔积液;特指肾盂积水;后天性肾囊肿;胸椎骨折	治愈	孔建中	陈墨川	方文来	肩胛骨骨折切开复位钢针内固定术
1550	D07儿童骨科、骨盆外科	2022-04-02	2022-04-09	3211724	陈梓逸	男	4Y	股骨干骨折		治愈	张敬东	李玉安	方明桥	股骨骨折闭合复位钢针内固定术
1551	D07儿童骨科、骨盆外科	2022-04-03	2022-04-09	3211776	王胤灵	男	11Y	胫腓骨下端骨折	腰椎骨折	治愈	张敬东	李玉安	闫广奎	腓骨骨折切开复位钢针内固定术
1552	D07儿童骨科、骨盆外科	2022-04-01	2022-04-09	3211824	刘铭皓	男	3Y	开放性拇指骨折	开放性手指损伤伴指甲损害;手软组织异物残留	治愈	张敬东	易先宏	闫广奎	手异物去除;甲成形术;指骨骨折闭合复位钢针内固定术;皮肤和皮下坏死组织切除清创术
1553	D07儿童骨科、骨盆外科	2022-02-21	2022-04-09	3211827	张绣绣	女	4Y	股骨骨折	颞骨骨折;枕骨骨折;下肢皮肤套脱伤;浅表损伤;坏疽;急性失血性贫血;头皮血肿;胫骨骨折;耻骨骨折	治愈	张敬东	李玉安	闫广奎	股骨骨折切开复位钢针内固定术;下肢肌腱缝合术;皮肤和皮下坏死组织切除清创术;同种皮肤移植术;创面负压封闭引流[VSD];胫骨骨折切开复位髓内针内固定术
1554	D07儿童骨科、骨盆外科	2022-04-06	2022-04-09	3211835	何宇涵	男	7Y	肱骨髁上骨折		好转	张敬东	李玉安	闫广奎	肱骨骨折闭合复位钢针内固定术
1555	D07儿童骨科、骨盆外科	2022-03-22	2022-04-09	3211883	虞新媚	女	36Y	开放性跖骨骨折	足背动脉损伤;踝和足水平趾长伸肌和肌腱损伤;小腿水平肌腱损伤;小腿水平腓神经损伤;跖骨脱位;精神分裂症;楔状骨骨折(足)	治愈	翁益民	翁益民	王特	下肢肌腱缝合术;创面负压封闭引流[VSD];跖骨骨折切开复位钢针内固定术;跗跖关节脱位切开复位术;楔骨骨折切开复位螺钉内固定术;关节软骨修复术
1556	D07儿童骨科、骨盆外科	2022-03-27	2022-04-09	3211960	谢纯吉	男	91Y	股骨颈骨折	下肢动脉粥样硬化;陈旧性肺结核	好转	翁益民	翁益民	王特	人工股骨头置换术
1557	D07儿童骨科、骨盆外科	2022-04-01	2022-04-10	3212207	冯赵冰	女	51Y	胫腓骨下端骨折	胆囊结石	治愈	孔建中	陈墨川	方文来	胫骨骨折切开复位钢针内固定术;腓骨骨折闭合复位钢针内固定术;胫骨植骨术
1558	D07儿童骨科、骨盆外科	2022-03-22	2022-04-10	3212216	雷宗伟	男	34Y	开放性胫骨骨干骨折	髋和下肢烧伤	治愈	孔建中	陈墨川	方文来	胫骨骨折切开复位钢针内固定术;皮肤和皮下坏死组织切除清创术;创面负压封闭引流[VSD]
1559	D07儿童骨科、骨盆外科	2022-03-29	2022-04-10	3212223	赵梓晨	女	5Y	股骨干骨折	股骨颈骨折;肱骨骨折	治愈	张敬东	李玉安	闫广奎	股骨骨折切开复位钢板内固定术;股骨骨折闭合复位钢针内固定术;肱骨骨折闭合复位髓内针内固定术
1560	D07儿童骨科、骨盆外科	2022-04-06	2022-04-10	3212226	苏恩俊	男	13Y	鹰嘴骨折		治愈	张敬东	闫广奎	闫广奎	尺骨骨折切开复位钢针内固定术
1561	D07儿童骨科、骨盆外科	2022-04-04	2022-04-10	3212235	陈志亮	男	3Y	肱骨外髁骨折		治愈	张敬东	易先宏	闫广奎	肱骨骨折切开复位钢针内固定术
1562	D07儿童骨科、骨盆外科	2022-04-07	2022-04-10	3212260	周明鑫	男	6Y	蒙特贾骨折脱位	前臂桡神经损伤	治愈	张敬东	易先宏	闫广奎	桡尺关节脱位闭合复位术;尺骨骨折闭合复位钢针内固定术
1563	D07儿童骨科、骨盆外科	2022-03-30	2022-04-10	3212362	陈贤妹	女	66Y	闭合性胫骨平台骨折	胆囊结石;高血压病;肾结石;脂肪肝	治愈	翁益民	翁益民	王特	胫骨骨折切开复位钢针内固定术
1564	D07儿童骨科、骨盆外科	2022-03-28	2022-04-11	3212438	卫征	男	32Y	跟骨骨折	外踝骨折;脂肪肝	治愈	孔建中	陈墨川	方文来	跟骨骨折切开复位钢板内固定术;关节软骨修复术;创面负压封闭引流[VSD];跟骨植骨术
1565	D07儿童骨科、骨盆外科	2022-04-07	2022-04-11	3212523	王梓祥	男	4Y	肱骨外髁骨折		好转	张敬东	李玉安	闫广奎	肱骨骨折切开复位钢针内固定术
1566	D07儿童骨科、骨盆外科	2022-04-09	2022-04-11	3212530	金逸逸	女	5Y	肱骨髁上骨折		治愈	张敬东	李玉安	方明桥	肱骨骨折闭合复位钢针内固定术
1567	D07儿童骨科、骨盆外科	2022-04-09	2022-04-11	3212531	邹子轩	男	5Y	肱骨髁上骨折		治愈	张敬东	李玉安	方明桥	肱骨骨折闭合复位钢针内固定术
1568	D07儿童骨科、骨盆外科	2022-04-07	2022-04-11	3212540	王皓宇	男	3Y	肱骨外髁骨折		治愈	张敬东	易先宏	方明桥	肱骨骨折切开复位钢针内固定术
1569	D07儿童骨科、骨盆外科	2022-04-06	2022-04-11	3212549	杜康嘉恒	男	6Y	肱骨外髁骨折		治愈	张敬东	易先宏	方明桥	肱骨骨折切开复位钢针内固定术
1570	D07儿童骨科、骨盆外科	2022-04-10	2022-04-11	3212696	蔡译	男	8Y	锁骨骨折		好转	张敬东	李玉安	方明桥
1571	D07儿童骨科、骨盆外科	2022-03-21	2022-04-12	3212932	周立新	男	55Y	胫腓骨下端骨折	后天性肾囊肿;内踝骨折;脂肪肝	治愈	孔建中	陈墨川	方文来	胫骨骨折切开复位钢板内固定术;腓骨骨折切开复位钢板内固定术;踝关节骨折切开复位钢针内固定术
1572	D07儿童骨科、骨盆外科	2022-04-07	2022-04-12	3212937	周送英	女	49Y	胫腓骨闭合性骨折	2型糖尿病;高血压病;脂肪肝	治愈	孔建中	陈墨川	方文来	胫骨骨折闭合复位髓内针内固定术
1573	D07儿童骨科、骨盆外科	2022-04-06	2022-04-12	3212940	郑开强	男	64Y	股骨颈骨折	前列腺结石;下肢动脉粥样硬化	好转	孔建中	陈墨川	方文来	股骨骨折闭合复位钢针内固定术
1574	D07儿童骨科、骨盆外科	2022-04-10	2022-04-12	3212953	吴恒宇	男	1Y	开放性手指损伤伴指甲损害	指骨骨折	治愈	张敬东	李玉安	毛诚晃	皮肤和皮下坏死组织切除清创术;甲成形术
1575	D07儿童骨科、骨盆外科	2022-04-04	2022-04-12	3212958	黄思佳	女	12Y	踝骨闭合性骨折		治愈	张敬东	易先宏	闫广奎	踝关节骨折切开复位钢针内固定术
1576	D07儿童骨科、骨盆外科	2022-04-01	2022-04-13	3213352	张友涵	男	5Y	股骨粗隆间骨折	胰损伤;髋臼骨折;皮肤挫伤;肺挫伤;创伤性气胸;髋关节脱位;耻骨骨折;颈椎骨折	治愈	张敬东	易先宏	闫广奎	股骨骨折闭合复位钢针内固定术
1577	D07儿童骨科、骨盆外科	2022-04-11	2022-04-13	3213362	严书俊	男	9Y	肱骨髁上骨折		好转	张敬东	李玉安	毛诚晃	肱骨骨折切开复位钢针内固定术
1578	D07儿童骨科、骨盆外科	2022-04-09	2022-04-13	3213375	郁斯思	女	9Y	蒙特贾骨折脱位		治愈	张敬东	毛诚晃	闫广奎	尺骨骨折闭合复位术
1579	D07儿童骨科、骨盆外科	2022-04-11	2022-04-13	3213395	郭和栩	男	1Y	肱骨髁上骨折	前臂神经损伤	治愈	张敬东	李玉安	毛诚晃	肱骨骨折闭合复位钢针内固定术
1580	D07儿童骨科、骨盆外科	2022-04-10	2022-04-13	3213401	朱骏图	男	2Y	肱骨髁上骨折	前臂神经损伤	治愈	张敬东	李玉安	方明桥	肱骨骨折闭合复位钢针内固定术
1581	D07儿童骨科、骨盆外科	2022-04-06	2022-04-13	3213434	崔佳燕	女	15Y	肱骨内髁骨折	桡骨头骨折;肱骨外髁骨折	治愈	张敬东	易先宏	闫广奎	肱骨骨折切开复位钢针内固定术
1582	D07儿童骨科、骨盆外科	2022-04-03	2022-04-14	3213818	王文华	女	89Y	股骨粗隆间骨折	颈动脉硬化;下肢动脉粥样硬化;心房颤动;高血压病;髋臼骨折;陈旧性肋骨骨折;耻骨骨折;骨质疏松;肺部感染;胸腔积液;老年性痴呆	治愈	翁益民	翁益民	王特	股骨骨折闭合复位钢针内固定术
1583	D07儿童骨科、骨盆外科	2022-04-07	2022-04-14	3213914	林左维	男	51Y	三踝骨折	特指心律失常	治愈	孔建中	陈墨川	方文来	关节软骨修复术;踝关节骨折切开复位钢针内固定术;踝关节融合术
1584	D07儿童骨科、骨盆外科	2022-04-07	2022-04-14	3213967	潘顺伦	男	38Y	双踝骨折	跖骨骨折;肝囊肿	治愈	孔建中	陈墨川	方文来	踝关节骨折切开复位钢针内固定术
1585	D07儿童骨科、骨盆外科	2022-04-07	2022-04-15	3214078	林兰妹	女	68Y	尺骨桡骨远端骨折	下肢动脉粥样硬化;高血压病;脂肪肝	治愈	孔建中	陈墨川	方文来	桡骨骨折切开复位钢针内固定术
1586	D07儿童骨科、骨盆外科	2022-04-12	2022-04-15	3214112	胡六英	女	52Y	内踝骨折	肱骨上端骨折;桡骨下端骨折;下肢动脉粥样硬化;下肢静脉血栓形成;肝囊肿;肾结石	治愈	孔建中	陈墨川	方文来	关节软骨修复术;踝关节骨折切开复位钢针内固定术
1587	D07儿童骨科、骨盆外科	2022-04-09	2022-04-16	3214186	姚鸿	男	7Y	蒙特贾骨折脱位	上臂神经损伤	治愈	张敬东	易先宏	闫广奎	尺骨骨折切开复位钢针内固定术
1588	D07儿童骨科、骨盆外科	2022-04-09	2022-04-16	3214326	吴疆	男	9Y	胫骨上端骨折		治愈	张敬东	易先宏	闫广奎	膝关节镜下胫骨髁间棘骨折固定术
1589	D07儿童骨科、骨盆外科	2022-04-03	2022-04-16	3214329	叶建光	男	47Y	跟骨骨折	踝和足浅表损伤;胆囊息肉	治愈	翁益民	翁益民	王特	跟骨骨折切开复位钢针内固定术;关节软骨修复术
1590	D07儿童骨科、骨盆外科	2022-04-11	2022-04-16	3214343	卢锦帅	男	2Y	肱骨外髁骨折		治愈	张敬东	李玉安	闫广奎	肱骨骨折闭合复位钢针内固定术
1591	D07儿童骨科、骨盆外科	2022-04-03	2022-04-16	3214349	陈余平	女	61Y	股骨粗隆间骨折	脂肪肝;下肢静脉血栓形成;下肢动脉粥样硬化;高血压病;特指手术后状态	好转	翁益民	翁益民	王特	股骨骨折闭合复位钢针内固定术
1592	D07儿童骨科、骨盆外科	2022-04-12	2022-04-16	3214362	金昊	男	5Y	胫骨骨干骨折		治愈	张敬东	李玉安	闫广奎	胫骨骨折闭合复位螺钉内固定术
1593	D07儿童骨科、骨盆外科	2022-04-15	2022-04-16	3214380	陈鹤鹏	男	59Y	肩关节脱位	肱骨上端骨折;2型糖尿病	治愈	孔建中	陈墨川	方文来	肩关节脱位闭合复位术
1594	D07儿童骨科、骨盆外科	2022-04-10	2022-04-16	3214399	赵一诺	男	2Y	股骨干骨折		治愈	张敬东	易先宏	方明桥	股骨骨折闭合复位钢针内固定术
1595	D07儿童骨科、骨盆外科	2022-04-15	2022-04-16	3214561	苏良菊	女	78Y	肩关节脱位	肱骨上端骨折;肩胛骨骨折;高血压病	治愈	翁益民	翁益民	王特	肩关节脱位闭合复位术
1596	D07儿童骨科、骨盆外科	2022-04-07	2022-04-17	3214737	邹秀妹	女	85Y	股骨颈骨折	原发性肺动脉高压;肾萎缩;房性早搏;高血压病;肺结节;下肢动脉粥样硬化;心脏瓣膜病	好转	孔建中	陈墨川	方文来	人工股骨头置换术;髋关节松解术;髋关节假体取出术;髋关节滑膜切除术
1597	D07儿童骨科、骨盆外科	2022-04-11	2022-04-17	3214741	陈小兰	女	50Y	胫腓骨干骨折	肾结石;胆囊结石;下肢动脉粥样硬化	好转	孔建中	陈墨川	方文来	胫骨骨折切开复位钢针内固定术
1598	D07儿童骨科、骨盆外科	2022-04-13	2022-04-17	3215070	林泽轩	男	4Y	取除骨折内固定装置		其他	张敬东	李玉安	闫广奎	胫骨内固定物取出术
1599	D07儿童骨科、骨盆外科	2022-04-07	2022-04-18	3215249	季锦华	男	82Y	股骨颈骨折	后天性肾囊肿;高血压病;前列腺结石;前列腺增生;心脏瓣膜病;胆囊结石;2型糖尿病	好转	孔建中	陈墨川	陈墨川	髋关节松解术;髋关节镜下滑膜切除术;人工股骨头置换术
1600	D07儿童骨科、骨盆外科	2022-03-30	2022-04-18	3215303	曹秀眉	女	81Y	股骨颈骨折	肝囊肿;泌尿道感染;肾结石;高血压病;胆囊结石;下肢动脉粥样硬化;肺部感染	好转	孔建中	陈墨川	方文来	人工股骨头置换术
1601	D07儿童骨科、骨盆外科	2022-04-14	2022-04-18	3215313	郑斯翔	男	7Y	肱骨外髁骨折		好转	张敬东	李玉安	闫广奎	肱骨骨折切开复位钢针内固定术
1602	D07儿童骨科、骨盆外科	2022-03-30	2022-04-18	3215315	蔡建国	男	46Y	跖骨骨折	特指趾骨骨折;肾结石;特指手术后状态	治愈	孔建中	陈墨川	方文来	跖骨骨折切开复位钢板内固定术
1603	D07儿童骨科、骨盆外科	2022-04-08	2022-04-19	3215452	陈政伟	男	42Y	跟骨骨折	多发性肝囊肿;后天性肾囊肿;肝功能异常;陈旧性肺结核	治愈	翁益民	翁益民	王特	跟骨骨折切开复位钢针内固定术;关节软骨修复术
1604	D07儿童骨科、骨盆外科	2022-04-13	2022-04-19	3215518	辜小芸	女	7Y	肱骨外科颈骨折		好转	张敬东	易先宏	闫广奎	肱骨骨折闭合复位钢针内固定术
1605	D07儿童骨科、骨盆外科	2022-04-15	2022-04-19	3215521	应建波	男	6Y	肱骨髁上骨折		好转	张敬东	易先宏	闫广奎	肱骨骨折闭合复位钢针内固定术
1606	D07儿童骨科、骨盆外科	2022-04-13	2022-04-19	3215539	陈笑梅	女	67Y	肱骨上端骨折	肺结节;下肢动脉粥样硬化;Ⅰ度房室传导阻滞;高血压病;心脏瓣膜病	治愈	孔建中	陈墨川	方文来	肱骨骨折切开复位钢针内固定术
1607	D07儿童骨科、骨盆外科	2022-04-09	2022-04-19	3215552	李时钊	男	13Y	鹰嘴骨折	成骨不全;胫骨上端骨折;取除骨折内固定装置	治愈	张敬东	李玉安	毛诚晃	尺骨骨折切开复位钢针内固定术;胫骨骨折切开复位钢针内固定术;尺骨内固定物取出术
1608	D07儿童骨科、骨盆外科	2022-04-07	2022-04-19	3215586	邵三妹	女	71Y	股骨颈骨折	下肢动脉粥样硬化;不完全性右束支传导阻滞;肾结石;肝囊肿;脂肪肝;心脏瓣膜病	治愈	孔建中	陈墨川	方文来	髋关节滑膜切除术;髋关节松解术;全髋关节表面置换术
1609	D07儿童骨科、骨盆外科	2022-04-14	2022-04-20	3215877	吉俊昊	男	1Y	特指单个手指部分或完全切断	开放性指骨骨折	治愈	张敬东	李玉安	闫广奎	皮肤和皮下坏死组织切除清创术;石膏绷带固定
1610	D07儿童骨科、骨盆外科	2022-04-17	2022-04-20	3215893	陈丽丽	女	8Y	桡骨下端骨折		好转	张敬东	李玉安	毛诚晃	桡骨骨折闭合复位钢针内固定术
1611	D07儿童骨科、骨盆外科	2022-04-16	2022-04-20	3216004	徐子轩	男	6Y	肱骨外髁骨折		好转	张敬东	易先宏	闫广奎	肱骨骨折切开复位钢针内固定术
1612	D07儿童骨科、骨盆外科	2022-04-10	2022-04-20	3216016	翁文院	男	39Y	股骨头无菌性坏死	后天性肾囊肿;取除骨折内固定装置;肾功能异常	治愈	孔建中	陈墨川	方文来	股骨内固定物取出术;全髋关节表面置换术
1613	D07儿童骨科、骨盆外科	2022-03-31	2022-04-20	3216027	翁爱珠	女	64Y	股骨颈骨折	脂肪肝;卵巢囊肿;额骨骨折;眶骨骨折;肋骨骨折;下肢动脉粥样硬化;脑挫伤;创伤性硬膜外血肿;创伤性蛛网膜下腔出血;高血压病;股骨颈骨折	治愈	翁益民	翁益民	王特	全髋关节表面置换术
1614	D07儿童骨科、骨盆外科	2022-04-15	2022-04-20	3216036	汪克选	男	64Y	锁骨骨折	前列腺增生;前列腺结石;腔隙性脑梗死;肋骨骨折	治愈	孔建中	孔建中	方文来	锁骨骨折切开复位钢针内固定术
1615	D07儿童骨科、骨盆外科	2022-04-17	2022-04-20	3216195	贺依晨	女	6Y	肱骨干骨折		好转	张敬东	李玉安	毛诚晃	肱骨骨折闭合复位钢针内固定术
1616	D07儿童骨科、骨盆外科	2022-04-15	2022-04-21	3215974	李秀花	女	56Y	肱骨上端骨折	多发性肝囊肿;肺结节	治愈	孔建中	陈墨川	方文来	肱骨骨折切开复位钢针内固定术
1617	D07儿童骨科、骨盆外科	2022-04-18	2022-04-21	3216472	张梦浩	男	10Y	肱骨髁上骨折	前臂神经损伤	治愈	张敬东	李玉安	闫广奎	肱骨骨折闭合复位钢针内固定术
1618	D07儿童骨科、骨盆外科	2022-04-17	2022-04-21	3216473	孙翊航	男	3Y	肱骨髁上骨折		好转	张敬东	易先宏	闫广奎	肱骨骨折切开复位钢针内固定术
1619	D07儿童骨科、骨盆外科	2022-04-19	2022-04-21	3216482	厉宣墨	男	10Y	肱骨髁上骨折	前臂神经损伤	好转	张敬东	李玉安	王伟	肱骨骨折切开复位钢针内固定术
1620	D07儿童骨科、骨盆外科	2022-04-13	2022-04-23	3216917	蒋瑞伟	男	10Y	蒙特贾骨折脱位	前臂神经损伤	治愈	张敬东	闫广奎	闫广奎	尺骨骨折切开复位钢针内固定术
1621	D07儿童骨科、骨盆外科	2022-04-19	2022-04-23	3216934	金柏森	男	9Y	肱骨髁上骨折	上臂神经损伤	治愈	张敬东	易先宏	方明桥	肱骨骨折切开复位钢针内固定术
1622	D07儿童骨科、骨盆外科	2022-04-19	2022-04-23	3216957	尤祖劲	男	10Y	肱骨内髁骨折		好转	张敬东	易先宏	闫广奎	肱骨骨折切开复位钢针内固定术
1623	D07儿童骨科、骨盆外科	2022-04-10	2022-04-23	3217073	季国珍	男	90Y	股骨颈骨折	肺部感染;下肢动脉粥样硬化;肺部阴影;前列腺增生;老年性痴呆;褥疮;前列腺结石;后天性肾囊肿	治愈	翁益民	翁益民	王特	人工股骨头置换术
1624	D07儿童骨科、骨盆外科	2022-04-18	2022-04-23	3217151	邵凯	男	12Y	肱骨内髁骨折	特指手术后状态	好转	张敬东	李玉安	闫广奎	肱骨骨折切开复位钢针内固定术
1625	D07儿童骨科、骨盆外科	2022-04-19	2022-04-23	3217155	赵可欣	女	11Y	胫骨骨折		治愈	张敬东	李玉安	方明桥	胫骨骨折闭合复位螺钉内固定术
1626	D07儿童骨科、骨盆外科	2022-04-18	2022-04-23	3217195	肖崇昌	男	90Y	股骨颈骨折	前列腺增生;胸腔积液;肺气肿;下肢静脉血栓形成;下肢动脉粥样硬化;完全性右束支传导阻滞;后天性肾囊肿	好转	孔建中	陈墨川	方文来	人工股骨头置换术
1627	D07儿童骨科、骨盆外科	2022-04-13	2022-04-24	3217187	夏松玉	女	71Y	锁骨骨折	下肢动脉粥样硬化;腰骶部脊柱骨折;脂肪肝;肋骨骨折;脑挫伤;腰部软组织损伤	治愈	孔建中	陈墨川	方文来	锁骨骨折切开复位钢针内固定术
1628	D07儿童骨科、骨盆外科	2022-04-18	2022-04-24	3217350	靳双旗	男	12Y	锁骨骨折		治愈	张敬东	李玉安	闫广奎	锁骨骨折切开复位钢针内固定术
1629	D07儿童骨科、骨盆外科	2022-04-19	2022-04-24	3217353	张贤良	男	40Y	取除骨折内固定装置	前列腺结石;肾结石;后天性肾囊肿	其他	翁益民	翁益民	王特	踝关节内固定物取出术
1630	D07儿童骨科、骨盆外科	2022-04-21	2022-04-24	3217357	张宇浩	男	3Y	尺骨桡骨远端骨折		治愈	张敬东	易先宏	闫广奎	桡骨骨折闭合复位钢针内固定术
1631	D07儿童骨科、骨盆外科	2022-04-21	2022-04-24	3217358	林立锐	男	7Y	肱骨髁上骨折		治愈	张敬东	李玉安	闫广奎	肱骨骨折闭合复位钢针内固定术
1632	D07儿童骨科、骨盆外科	2022-04-19	2022-04-24	3217364	李尚濠	男	12Y	指骨骨折	特指手术后状态	治愈	张敬东	李玉安	王伟	石膏绷带固定;皮肤和皮下坏死组织切除清创术;指骨骨折切开复位钢针内固定术
1633	D07儿童骨科、骨盆外科	2022-04-16	2022-04-24	3217441	郑送莲	女	50Y	胫腓骨闭合性骨折	脂肪肝	治愈	翁益民	翁益民	王特	胫骨骨折切开复位钢针内固定术
1634	D07儿童骨科、骨盆外科	2022-04-22	2022-04-25	3217734	焦若萱	女	4Y	肱骨髁上骨折		好转	张敬东	闫广奎	闫广奎	肱骨骨折闭合复位钢针内固定术
1635	D07儿童骨科、骨盆外科	2022-04-24	2022-04-25	3217864	陈冠宇	男	9Y	锁骨骨折		好转	张敬东	易先宏	方明桥
1636	D07儿童骨科、骨盆外科	2022-04-20	2022-04-25	3217871	温安体	男	37Y	股骨颈骨折		治愈	孔建中	陈墨川	方文来	股骨骨折闭合复位钢针内固定术
1637	D07儿童骨科、骨盆外科	2022-04-24	2022-04-26	3218141	王翊志	男	6Y	肱骨髁上骨折	上臂神经损伤	治愈	张敬东	李玉安	闫广奎	肱骨骨折闭合复位钢针内固定术
1638	D07儿童骨科、骨盆外科	2022-04-20	2022-04-27	3218431	陈铂航	男	9Y	肱骨下端骨折		好转	张敬东	易先宏	闫广奎	肱骨骨折切开复位钢针内固定术
1639	D07儿童骨科、骨盆外科	2022-04-16	2022-04-27	3218561	李昊泽	男	5Y	胫腓骨干骨折	面部裂伤	治愈	张敬东	毛诚晃	闫广奎	皮肤和皮下坏死组织切除清创术;胫骨骨折切开复位髓内针内固定术
1640	D07儿童骨科、骨盆外科	2022-04-16	2022-04-27	3218774	朱杰	男	16Y	胫腓骨干骨折	小腿浅表损伤	好转	翁益民	翁益民	王特	腓骨骨折闭合复位髓内针内固定术;胫骨骨折切开复位钢板内固定术
1641	D07儿童骨科、骨盆外科	2022-04-20	2022-04-28	3218970	林子翔	男	4Y	腕和手水平特指手指伸肌和肌腱损伤	掌指和指间关节处的手指韧带创伤性破裂;开放性指骨骨折;开放性手指损伤不伴指甲损害	治愈	张敬东	易先宏	王伟	副韧带修补术;肌腱、血管、神经探查术;手部肌腱成形术;关节软骨修复术
1642	D07儿童骨科、骨盆外科	2022-04-26	2022-04-28	3218978	陈宇	男	14Y	肱骨髁上骨折		治愈	张敬东	易先宏	王伟	肱骨骨折闭合复位钢针内固定术
1643	D07儿童骨科、骨盆外科	2022-04-18	2022-04-28	3219068	杜春莲	女	70Y	股骨颈骨折	2型糖尿病;冠状动脉粥样硬化;肾结石;高血压病;下肢动脉粥样硬化	治愈	孔建中	陈墨川	方文来	股骨骨折闭合复位钢针内固定术
1644	D07儿童骨科、骨盆外科	2022-04-17	2022-04-28	3219076	闵长久	男	50Y	三踝骨折	下肢静脉血栓形成	治愈	孔建中	陈墨川	方文来	踝关节骨折切开复位钢针内固定术
1645	D07儿童骨科、骨盆外科	2022-04-19	2022-04-28	3219105	王燕	女	34Y	骨盆骨折	风湿性二尖瓣狭窄伴关闭不全;腰椎骨折	好转	孔建中	陈墨川	方文来	骨盆骨折切开复位钢针内固定术
1646	D07儿童骨科、骨盆外科	2022-04-27	2022-04-28	3219339	薛显滔	男	49Y	跟骨骨折	后天性肾囊肿	未愈	孔建中	陈墨川	方文来
1647	D07儿童骨科、骨盆外科	2022-04-26	2022-04-29	3219380	缪毓桂	男	8Y	取除骨折内固定装置		其他	张敬东	李玉安	方明桥	尺骨内固定物取出术
1648	D07儿童骨科、骨盆外科	2022-04-26	2022-04-29	3219388	杨凯伦	男	6Y	取除骨折内固定装置		其他	张敬东	李玉安	闫广奎	胫骨内固定物取出术
1649	D07儿童骨科、骨盆外科	2022-04-08	2022-04-29	3219401	黄诗琪	女	1Y	指骨骨折	腕和手水平特指手指伸肌和肌腱损伤;腕和手水平特指手指屈肌和肌腱损伤;开放性手部损伤;指关节脱位	治愈	张敬东	易先宏	王伟	手指肌腱成形术;指骨骨折切开复位钢针内固定术;皮肤和皮下坏死组织切除清创术
1650	D07儿童骨科、骨盆外科	2022-04-25	2022-04-29	3219479	李金泽	男	3Y	取除骨折内固定装置		其他	张敬东	易先宏	闫广奎	股骨内固定物取出术
1651	D07儿童骨科、骨盆外科	2022-04-03	2022-04-29	3219495	陈春英	女	75Y	跖骨骨折	足部皮肤撕裂伤;楔状骨骨折(足);下肢动脉粥样硬化;足舟状骨骨折;脂肪肝	治愈	翁益民	翁益民	王特	创面负压封闭引流[VSD];跖骨骨折切开复位钢针内固定术;皮肤和皮下坏死组织切除清创术;皮瓣修整术
1652	D07儿童骨科、骨盆外科	2022-04-25	2022-04-29	3219498	余晓语	女	10Y	取除骨折内固定装置		其他	张敬东	李玉安	闫广奎	胫骨内固定物取出术
1653	D07儿童骨科、骨盆外科	2022-04-26	2022-04-29	3219507	龚小明	女	45Y	取除骨折内固定装置	乙型肝炎小三阳	其他	翁益民	翁益民	王特	胫骨内固定物取出术
1654	D07儿童骨科、骨盆外科	2022-04-28	2022-04-30	3219702	魏鑫宇	男	4Y	肱骨髁上骨折		治愈	张敬东	李玉安	方明桥	肱骨骨折闭合复位钢针内固定术
1655	D07儿童骨科、骨盆外科	2022-04-23	2022-05-01	3220015	倪阿锋	男	42Y	锁骨骨折	肝囊肿;脂肪肝;后天性肾囊肿;骨折不连接	好转	孔建中	陈墨川	方文来	髂骨取骨术;锁骨植骨术
1656	D07儿童骨科、骨盆外科	2022-04-29	2022-05-01	3220046	陈紫琳	女	2Y	肱骨髁上骨折	上臂神经损伤	治愈	张敬东	李玉安	方明桥	肱骨骨折闭合复位钢针内固定术
1657	D07儿童骨科、骨盆外科	2022-04-19	2022-05-02	3220116	盛燕飞	女	40Y	髂骨骨折	耻骨骨折	好转	孔建中	陈墨川	方文来	骨盆骨折切开复位钢板内固定术
1658	D07儿童骨科、骨盆外科	2022-04-28	2022-05-02	3220140	吴原国	男	7Y	肱骨髁上骨折		好转	张敬东	易先宏	闫广奎	肱骨骨折闭合复位钢针内固定术
1659	D07儿童骨科、骨盆外科	2022-04-23	2022-05-02	3220243	陈骏	男	11Y	尺骨上端骨折	桡骨上端骨折	好转	张敬东	李玉安	毛诚晃	尺骨骨折切开复位钢板内固定术;上肢关节囊缝合术;桡骨骨折切开复位螺钉内固定术
1660	D07儿童骨科、骨盆外科	2022-04-23	2022-05-02	3220244	陈姜昊	男	9Y	肱骨骨折		治愈	张敬东	李玉安	毛诚晃	肱骨骨折切开复位髓内针内固定术
1661	D07儿童骨科、骨盆外科	2022-04-24	2022-05-02	3220234	高乐妙	女	46Y	股骨骨折	多发性肋骨骨折;皮肤挫伤;乙型病毒性肝炎;眶骨骨折;肝功能异常;创伤性气胸	好转	孔建中	陈墨川	方文来	股骨骨折切开复位钢板内固定术
1662	D07儿童骨科、骨盆外科	2022-04-25	2022-05-02	3220465	唐阳	男	6Y	胫腓骨干骨折		好转	张敬东	易先宏	闫广奎
1663	D07儿童骨科、骨盆外科	2022-05-01	2022-05-03	3220509	刘凯旋	男	3Y	肱骨髁上骨折		治愈	张敬东	李玉安	方明桥	肱骨骨折闭合复位钢针内固定术
1664	D07儿童骨科、骨盆外科	2022-04-28	2022-05-03	3220533	徐语希	女	2Y	胫骨下端骨折		好转	张敬东	李玉安	毛诚晃
1665	D07儿童骨科、骨盆外科	2022-04-23	2022-05-03	3220553	雷光全	男	55Y	桡骨头骨折	脂肪肝;桡骨下端骨折;尺骨上端骨折;骨盆骨折;腰椎骨折;鼻骨骨折	好转	孔建中	陈墨川	方文来	桡骨小头切除术;尺骨骨折切开复位钢板内固定术
1666	D07儿童骨科、骨盆外科	2022-04-17	2022-05-03	3220615	谢吉年	男	74Y	胫腓骨闭合性骨折	骨盆骨折;颈椎骨折;下肢动脉粥样硬化;颈椎间盘突出;硬脑膜下积液;肺气肿;肺大泡;多发性脑梗死	好转	孔建中	陈墨川	方文来	胫骨人工骨植骨术;腓骨人工骨植骨术;胫骨骨折切开复位螺钉内固定术;腓骨骨折切开复位钢板内固定术
1667	D07儿童骨科、骨盆外科	2022-04-25	2022-05-04	3221181	李斌	男	52Y	锁骨骨折	慢性轻度乙型病毒性肝炎;肝硬化;肝功能异常;肾结石;肝囊肿;胆囊结石;前列腺增生	治愈	孔建中	陈墨川	方文来	锁骨骨折切开复位钢板内固定术
1668	D07儿童骨科、骨盆外科	2022-04-24	2022-05-04	3221224	苏式勇	男	58Y	髋臼骨折	肺结节;皮下血肿	好转	孔建中	陈墨川	方文来	髋骨骨折切开复位钢板内固定术;髋骨人工骨植骨术;关节软骨修复术
1669	D07儿童骨科、骨盆外科	2022-05-03	2022-05-05	3221287	周子芊	女	4Y	肱骨髁上骨折		治愈	张敬东	闫广奎	方明桥	肱骨骨折切开复位钢针内固定术
1670	D07儿童骨科、骨盆外科	2022-04-28	2022-05-05	3221297	夏珊妮	女	9Y	桡骨颈骨折		治愈	张敬东	易先宏	方明桥	桡骨骨折切开复位钢针内固定术
1671	D07儿童骨科、骨盆外科	2022-04-12	2022-05-05	3221553	李奶儿	女	36Y	骨盆骨折	多发性腰椎骨折;肾包膜下积液;中度贫血;肾挫伤;掌骨骨折;尺骨上端骨折;胸腔积液;骨盆周围神经损伤;尺骨下端骨折;膝内侧半月板损伤;膝关节副韧带扭伤;股骨下端骨折	好转	孔建中	陈墨川	陈墨川	骨盆骨折切开复位螺钉内固定术;髂骨骨折切开复位钢板内固定术
1672	D07儿童骨科、骨盆外科	2022-04-27	2022-05-05	3221554	张新林	男	60Y	开放性胫骨骨干骨折	下肢动脉粥样硬化	好转	孔建中	陈墨川	方文来	胫骨骨折闭合复位髓内针内固定术;胫骨开放性骨折清创术
1673	D07儿童骨科、骨盆外科	2022-05-03	2022-05-06	3221631	陈泓林	男	7Y	取除骨折内固定装置		其他	张敬东	李玉安	闫广奎	尺骨内固定物取出术
1674	D07儿童骨科、骨盆外科	2022-05-04	2022-05-06	3221633	朱懿文	女	4Y	肱骨髁上骨折		治愈	张敬东	李玉安	方明桥	肱骨骨折闭合复位钢针内固定术
1675	D07儿童骨科、骨盆外科	2022-04-28	2022-05-06	3221658	邱之雨	女	8Y	胫腓骨闭合性骨折		好转	张敬东	毛诚晃	毛诚晃
1676	D07儿童骨科、骨盆外科	2022-05-01	2022-05-06	3221662	曹成	男	11Y	肱骨髁上骨折	桡骨下端骨折;上臂神经损伤	治愈	张敬东	王伟	方明桥	肱骨骨折切开复位钢针内固定术;桡骨骨折切开复位钢针内固定术
1677	D07儿童骨科、骨盆外科	2022-04-24	2022-05-07	3221899	汤大珍	女	50Y	肩胛骨骨折	多发性肋骨骨折;肝钙化灶;胸腔积液;气胸;肝囊肿	好转	翁益民	翁益民	王特	肩胛骨骨折切开复位钢板内固定术
1678	D07儿童骨科、骨盆外科	2022-05-03	2022-05-07	3221901	张宇杰	男	2Y	肱骨外髁骨折		治愈	张敬东	易先宏	闫广奎	肱骨骨折切开复位钢针内固定术
1679	D07儿童骨科、骨盆外科	2022-04-21	2022-05-07	3221914	周敏	男	45Y	踝骨闭合性骨折	左前分支传导阻滞	好转	孔建中	陈墨川	方文来	踝关节骨折切开复位钢板内固定术
1680	D07儿童骨科、骨盆外科	2022-04-28	2022-05-07	3221925	胡赛赛	女	32Y	足舟状骨骨折	骰骨骨折;窦性心律失常	好转	孔建中	陈墨川	方文来	跗骨骨折切开复位螺钉内固定术
1681	D07儿童骨科、骨盆外科	2022-05-05	2022-05-07	3222155	金婷暄	女	5Y	肱骨髁上骨折	上臂神经损伤	好转	张敬东	方明桥	闫广奎	肱骨骨折闭合复位钢针内固定术
1682	D07儿童骨科、骨盆外科	2022-05-02	2022-05-08	3222322	鹿纯民子	男	7Y	肱骨内髁骨折	肘关节脱位	好转	张敬东	李玉安	闫广奎	肱骨骨折切开复位钢针内固定术
1683	D07儿童骨科、骨盆外科	2022-05-01	2022-05-08	3222330	汪峻宇	男	8Y	足拇长伸肌腱断裂	开放性足损伤;胫腓骨闭合性骨折	治愈	张敬东	易先宏	闫广奎	(足母)长伸肌腱缝合术;胫骨骨折闭合复位螺钉内固定术;腓骨骨折闭合复位术;皮肤和皮下坏死组织切除清创术
1684	D07儿童骨科、骨盆外科	2022-04-29	2022-05-08	3222365	李彦愉	女	5Y	腕和手水平特指手指屈肌和肌腱损伤	开放性手指损伤不伴指甲损害;指骨骨折	治愈	张敬东	李玉安	方明桥	屈指肌腱缝合术;皮肤和皮下坏死组织切除清创术;皮肤缝合术
1685	D07儿童骨科、骨盆外科	2022-05-05	2022-05-08	3222610	王瑞晨	男	10Y	桡骨下端骨折		好转	张敬东	李玉安	闫广奎	桡骨骨折闭合复位钢针内固定术
1686	D07儿童骨科、骨盆外科	2022-05-07	2022-05-09	3222732	邱凌枫	男	8Y	肱骨髁上骨折		好转	张敬东	李玉安	方明桥	肱骨骨折闭合复位钢针内固定术
1687	D07儿童骨科、骨盆外科	2022-05-07	2022-05-09	3222733	张睿烁	男	4Y	尺骨桡骨骨干骨折		好转	孔建中	陈墨川	方文来	尺骨骨折闭合复位髓内针内固定术;桡骨骨折闭合复位髓内针内固定术
1688	D07儿童骨科、骨盆外科	2022-05-05	2022-05-09	3222735	宋语渊	女	4Y	肱骨髁上骨折		好转	张敬东	方明桥	闫广奎	肱骨骨折闭合复位钢针内固定术
1689	D07儿童骨科、骨盆外科	2022-04-28	2022-05-09	3222737	应开琴	男	77Y	股骨粗隆间骨折	特指胸内器官损伤;多发性胸椎骨折;胸骨骨折;枕骨骨折	治愈	孔建中	陈墨川	陈墨川	股骨骨折切开复位螺钉内固定术
1690	D07儿童骨科、骨盆外科	2022-05-04	2022-05-09	3222798	陈俞磊	男	2Y	肱骨髁上骨折		好转	张敬东	李玉安	方明桥	肱骨骨折闭合复位钢针内固定术
1691	D07儿童骨科、骨盆外科	2022-05-05	2022-05-10	3223087	代浩然	男	5Y	肱骨外髁骨折		好转	张敬东	方明桥	闫广奎	肱骨骨折切开复位钢针内固定术
1692	D07儿童骨科、骨盆外科	2022-05-07	2022-05-10	3223112	王主宇	男	55Y	取除骨折内固定装置	胆囊结石;脂肪肝;前列腺结石;2型糖尿病	其他	孔建中	陈墨川	方文来	股骨内固定物取出术
1693	D07儿童骨科、骨盆外科	2022-05-08	2022-05-11	3223438	陈一诺	女	6Y	取除骨折内固定装置		其他	张敬东	李玉安	闫广奎	腓骨内固定物取出术;胫骨内固定物取出术
1694	D07儿童骨科、骨盆外科	2022-04-29	2022-05-11	3223468	戴剑环	女	54Y	腓骨骨折累及踝关节		治愈	翁益民	翁益民	王特	腓骨骨折切开复位钢板内固定术
1695	D07儿童骨科、骨盆外科	2022-05-05	2022-05-11	3223470	蒋叶鑫	男	1Y	多手指部分切断	开放性手指损伤伴指甲损害;指骨骨折	好转	张敬东	方明桥	闫广奎	残端皮肤修整术;指骨钢针内固定术;皮肤和皮下坏死组织切除清创术;拔甲术;甲成形术;皮肤缝合术
1696	D07儿童骨科、骨盆外科	2022-05-06	2022-05-11	3223471	张永杭	男	5Y	股骨干骨折		好转	张敬东	方明桥	闫广奎	股骨骨折闭合复位髓内针内固定术
1697	D07儿童骨科、骨盆外科	2022-01-21	2022-05-11	3223544	吴则华	男	61Y	开放性胫腓骨干骨折	脂肪肝;下肢静脉血栓形成;股骨髁骨折;下肢动脉粥样硬化;小腿水平腓神经损伤;开放性髌骨骨折;高血压病;房性早搏;室性早搏;多处挫伤;前列腺结石	好转	孔建中	陈墨川	陈墨川	股骨骨折切开复位钢板内固定术;游离皮瓣移植术;创面负压封闭引流[VSD];皮肤和皮下坏死组织切除清创术;胫骨骨折切开复位钢板内固定术;股骨病损切除术
1698	D07儿童骨科、骨盆外科	2022-05-04	2022-05-11	3223593	徐俊星	男	89Y	股骨粗隆间骨折	慢性肾衰竭;慢性支气管炎;胆囊结石;房性早搏;肺部阴影;膀胱结石;高血压病;后天性肾囊肿;肾结石;下肢动脉硬化闭塞症;下肢动脉粥样硬化;2型糖尿病;Ⅰ度房室传导阻滞	好转	孔建中	陈墨川	方文来	股骨骨折切开复位螺钉内固定术
1699	D07儿童骨科、骨盆外科	2022-04-29	2022-05-12	3223846	陈乃木	男	69Y	股骨颈骨折	下肢动脉粥样硬化;脑血管病后遗症;高血压病;后天性肾囊肿;前列腺结石;前列腺增生;脂肪肝	好转	翁益民	翁益民	王特	人工股骨头置换术
1700	D07儿童骨科、骨盆外科	2022-05-08	2022-05-12	3223847	黄梓欣	女	1Y	肱骨外髁骨折		治愈	张敬东	毛诚晃	方明桥	肱骨骨折切开复位钢针内固定术;上肢关节囊缝合术;皮肤缝合术
1701	D07儿童骨科、骨盆外科	2022-05-07	2022-05-12	3223881	李曦	女	5Y	股骨骨折		治愈	张敬东	李玉安	方明桥	股骨骨折闭合复位髓内针内固定术
1702	D07儿童骨科、骨盆外科	2022-04-24	2022-05-12	3223890	张夫山	男	34Y	开放性距骨骨折	足部皮肤撕裂伤;慢性上颌窦炎;肺炎性肿块;阑尾结石;胸椎骨折;足舟骨脱位;踝和足韧带破裂	好转	翁益民	翁益民	王特	足血管、神经、肌腱探查术;皮肤和皮下坏死组织切除清创术
1703	D07儿童骨科、骨盆外科	2022-04-02	2022-05-12	3224139	林月胜	男	44Y	开放性距骨骨折	踝关节脱位;肝病;跖骨骨折	好转	孔建中	陈墨川	陈墨川	距骨骨折切开复位钢针内固定术;创面负压封闭引流[VSD];踝关节脱位切开复位术;皮肤和皮下坏死组织切除清创术
1704	D07儿童骨科、骨盆外科	2022-05-03	2022-05-13	3224142	滕世银	男	39Y	胫骨骨折累及踝关节	桡骨下端骨折	好转	孔建中	陈墨川	方文来	踝关节骨折切开复位钢板内固定术;桡骨骨折切开复位钢板内固定术
1705	D07儿童骨科、骨盆外科	2022-04-26	2022-05-14	3224309	陈超	男	23Y	外踝骨折	胆囊息肉	治愈	翁益民	翁益民	王特	踝关节骨折切开复位钢板内固定术
1706	D07儿童骨科、骨盆外科	2022-05-09	2022-05-14	3224320	林渲雅	女	3Y	肱骨髁上骨折		好转	张敬东	李玉安	闫广奎	肱骨骨折闭合复位钢针内固定术
1707	D07儿童骨科、骨盆外科	2022-05-08	2022-05-14	3224447	龙亮	男	14Y	鹰嘴骨折		好转	张敬东	李玉安	闫广奎	尺骨骨折切开复位钢针内固定术
1708	D07儿童骨科、骨盆外科	2022-04-28	2022-05-14	3224528	季伟中	男	64Y	锁骨骨折	心动过缓	好转	翁益民	翁益民	王特	锁骨骨折切开复位钢板内固定术
1709	D07儿童骨科、骨盆外科	2022-05-06	2022-05-14	3224532	胡俊贤	男	5Y	开放性胫腓骨干骨折		好转	张敬东	闫广奎	闫广奎	胫骨骨折切开复位钢针内固定术;皮肤和皮下坏死组织切除清创术;皮肤缝合术
1710	D07儿童骨科、骨盆外科	2022-05-02	2022-05-14	3224577	金春花	女	91Y	股骨颈骨折	下肢动脉粥样硬化;交界性早搏;后天性肾囊肿;肾结石;锁骨骨折;心脏瓣膜病	治愈	孔建中	陈墨川	方文来	人工股骨头置换术;金属-金属髋关节置换
1711	D07儿童骨科、骨盆外科	2022-05-09	2022-05-14	3224600	蔡小龙	男	49Y	闭合性胫骨平台骨折	高血压病;前列腺结石;胆囊息肉	好转	孔建中	陈墨川	方文来	胫骨骨折切开复位钢板内固定术;关节软骨修复术;胫骨人工骨植骨术
1712	D07儿童骨科、骨盆外科	2022-05-12	2022-05-14	3224606	张昕妤	女	3Y	肱骨髁上骨折		好转	张敬东	李玉安	闫广奎
1713	D07儿童骨科、骨盆外科	2022-05-04	2022-05-14	3224769	俞正杰	男	55Y	股骨骨折	高血压病;尿毒症	好转	孔建中	陈墨川	方文来	股骨骨折切开复位螺钉内固定术;筋膜缝合术
1714	D07儿童骨科、骨盆外科	2022-04-23	2022-05-15	3224918	蔡爱梅	女	61Y	开放性跖骨骨折	胆囊息肉;跖骨骨折;膝关节扭伤;趾伸肌腱断裂	治愈	翁益民	翁益民	王特	创面负压封闭引流[VSD];跖骨骨折切开复位钢针内固定术;趾肌腱缝合术;足血管、神经、肌腱探查术
1715	D07儿童骨科、骨盆外科	2022-05-09	2022-05-16	3225186	陈凤丹	女	90Y	股骨粗隆间骨折	下肢动脉粥样硬化;胆囊结石;高血压病;褥疮;肾结石;膀胱占位性病变;人工髋关节	好转	翁益民	翁益民	王特	股骨骨折切开复位螺钉内固定术
1716	D07儿童骨科、骨盆外科	2022-05-11	2022-05-16	3225209	连昱稀	男	9Y	肱骨髁上骨折		好转	孔建中	陈墨川	方文来	肱骨骨折闭合复位钢针内固定术
1717	D07儿童骨科、骨盆外科	2022-04-24	2022-05-16	3225210	吴志爱	女	75Y	肱骨上端骨折	肩胛骨骨折;脂肪肝;下肢静脉血栓形成;胆囊胆固醇沉着症;心房颤动;闭合性胫骨平台骨折;高血压病;冠状动脉支架植入后状态	好转	翁益民	翁益民	王特	胫骨骨折切开复位钢板内固定术;关节软骨修复术;下腔静脉滤器置入术;肱骨骨折切开复位钢板内固定术
1718	D07儿童骨科、骨盆外科	2022-05-12	2022-05-16	3225215	林依然	男	1Y	股骨干骨折	跖骨骨折	好转	张敬东	方明桥	闫广奎	股骨骨折闭合复位术;石膏夹板固定
1719	D07儿童骨科、骨盆外科	2022-05-02	2022-05-16	3225266	刘小林	男	49Y	骨折内固定装置障碍		好转	孔建中	陈墨川	方文来	股骨内固定物取出术;股骨骨折切开复位钢板内固定术;髂骨取骨术
1720	D07儿童骨科、骨盆外科	2022-05-11	2022-05-16	3225433	夏永新	男	45Y	开放性跖骨骨折	踝和足水平趾长伸肌和肌腱损伤;足背动脉损伤;踝和足水平多神经损伤;脂肪肝	好转	陈墨川	陈墨川	方文来	跖骨骨折切开复位钢针内固定术;下肢动脉部分切除伴吻合术;周围神经缝合术
1721	D07儿童骨科、骨盆外科	2022-05-08	2022-05-16	3225464	周约珥	男	2Y	胫腓骨干骨折		好转	张敬东	毛诚晃	闫广奎
1722	D07儿童骨科、骨盆外科	2022-05-11	2022-05-17	3225688	刘彬宇	男	5Y	取除骨折内固定装置		其他	张敬东	李玉安	方明桥	股骨内固定物取出术
1723	D07儿童骨科、骨盆外科	2022-05-11	2022-05-17	3225691	段瑞朗	男	7Y	肱骨髁上骨折		治愈	张敬东	李玉安	方明桥	肱骨骨折闭合复位钢针内固定术
1724	D07儿童骨科、骨盆外科	2022-05-12	2022-05-17	3225695	黄航航	男	8Y	取除骨折内固定装置		其他	张敬东	李玉安	方明桥	股骨内固定物取出术
1725	D07儿童骨科、骨盆外科	2022-05-11	2022-05-17	3225702	卢凯威	男	1Y	指骨骨折		治愈	张敬东	李玉安	方明桥	指骨骨折闭合复位钢针内固定术
1726	D07儿童骨科、骨盆外科	2022-05-04	2022-05-17	3225713	李阿翠	女	57Y	双踝骨折	后天性肾囊肿;肾结石;跖骨骨折;下肢静脉血栓形成;闭合性胫骨平台骨折	好转	孔建中	陈墨川	方文来	关节软骨修复术;跟骨人工骨植骨术;踝关节骨折切开复位钢板内固定术
1727	D07儿童骨科、骨盆外科	2022-05-11	2022-05-17	3225959	陈爱香	女	59Y	取除骨折内固定装置	肝囊肿	其他	孔建中	陈墨川	方文来	肱骨内固定物取出术
1728	D07儿童骨科、骨盆外科	2022-05-14	2022-05-18	3226037	黄子元	男	12Y	取除骨折内固定装置		其他	张敬东	李玉安	方明桥	桡骨内固定物取出术
1729	D07儿童骨科、骨盆外科	2022-05-09	2022-05-18	3226224	陈龙波	男	69Y	股骨干骨折	后天性肾囊肿;下肢静脉血栓形成;多发性肋骨骨折;2型糖尿病;肾结石	好转	孔建中	陈墨川	方文来	股骨骨折闭合复位髓内针内固定术;股静脉穿刺术;下腔静脉滤器置入术
1730	D07儿童骨科、骨盆外科	2022-05-11	2022-05-18	3226237	肖璟雯	女	8Y	肱骨髁上骨折		治愈	张敬东	闫广奎	方明桥	肱骨骨折闭合复位钢针内固定术
1731	D07儿童骨科、骨盆外科	2022-04-29	2022-05-18	3226255	胡纯林	男	7Y	骨折畸形愈合		好转	张敬东	易先宏	方明桥	胫骨骨折闭合复位术;石膏绷带固定;腓骨截骨术;皮肤和皮下组织脓肿抽吸术;创面负压封闭引流[VSD];皮肤和皮下组织非切除性清创
1732	D07儿童骨科、骨盆外科	2022-05-09	2022-05-19	3226469	黄孝悌	男	89Y	胫腓骨干骨折	下肢动脉粥样硬化;高血压病;下肢静脉血栓形成;皮肤挫伤;心动过速;肾积水伴肾结石	好转	孔建中	陈墨川	方文来	胫骨骨折切开复位钢板内固定术
1733	D07儿童骨科、骨盆外科	2022-05-09	2022-05-19	3226471	李依然	女	2Y	股骨髁骨折	肝损伤;创伤性气胸;皮肤挫伤	治愈	张敬东	闫广奎	方明桥
1734	D07儿童骨科、骨盆外科	2022-05-14	2022-05-20	3226776	郑娟娟	女	59Y	桡骨下端骨折	脂肪肝;高血压病;尺骨茎突骨折;2型糖尿病	好转	翁益民	翁益民	王特	桡骨外固定架固定术;桡骨骨折闭合复位螺钉内固定术
1735	D07儿童骨科、骨盆外科	2022-05-16	2022-05-20	3226806	赵芹花	女	62Y	桡骨下端骨折	尺骨茎突骨折;肝囊肿;脂肪肝	好转	翁益民	翁益民	王特	桡骨骨折闭合复位术;桡骨外固定架固定术
1736	D07儿童骨科、骨盆外科	2022-05-19	2022-05-21	3226876	叶雅婷	女	4Y	肱骨髁上骨折		好转	张敬东	李玉安	方明桥
1737	D07儿童骨科、骨盆外科	2022-05-10	2022-05-21	3226880	李思煊	男	8Y	胫腓骨下端骨折		治愈	张敬东	李玉安	方明桥	腓骨骨折切开复位钢板内固定术;胫骨骨折切开复位钢针内固定术
1738	D07儿童骨科、骨盆外科	2022-05-04	2022-05-21	3226892	刘皓宁	男	7Y	鹰嘴骨折		治愈	张敬东	闫广奎	方明桥	尺骨骨折切开复位钢针内固定术
1739	D07儿童骨科、骨盆外科	2022-05-17	2022-05-21	3226927	林子歆	女	11Y	取除骨折内固定装置	脊柱侧弯	其他	张敬东	闫广奎	王伟	肱骨内固定物取出术
1740	D07儿童骨科、骨盆外科	2022-05-18	2022-05-21	3226971	陈熠成	男	8Y	肱骨髁上骨折		治愈	张敬东	闫广奎	方明桥	肱骨骨折闭合复位钢针内固定术
1741	D07儿童骨科、骨盆外科	2022-05-18	2022-05-21	3226973	朱成鹏	男	12Y	肱骨髁上骨折		治愈	张敬东	闫广奎	方明桥	肱骨骨折闭合复位钢针内固定术
1742	D07儿童骨科、骨盆外科	2022-05-14	2022-05-21	3226978	王新平	男	7Y	桡骨颈骨折	尺骨上端骨折	治愈	张敬东	易先宏	方明桥	桡骨骨折切开复位钢针内固定术;石膏绷带固定
1743	D07儿童骨科、骨盆外科	2022-05-17	2022-05-21	3226995	金丞宣	男	13Y	第一掌骨骨折		治愈	张敬东	李玉安	方明桥	石膏绷带固定;掌骨骨折闭合复位钢针内固定术
1744	D07儿童骨科、骨盆外科	2022-05-10	2022-05-22	3227484	苏欣怡	女	8Y	胫腓骨下端骨折		治愈	张敬东	闫广奎	毛诚晃	胫骨骨折切开复位钢板内固定术
1745	D07儿童骨科、骨盆外科	2022-05-14	2022-05-22	3227564	郑毅然	男	6Y	胫腓骨下端骨折		治愈	张敬东	李玉安	方明桥	胫骨骨折切开复位髓内针内固定术
1746	D07儿童骨科、骨盆外科	2022-04-25	2022-05-22	3227570	武智航	男	6Y	胫腓骨下端骨折	骨筋膜室综合征	治愈	张敬东	易先宏	方明桥	创面负压封闭引流[VSD];筋膜间隙切开减压术;胫骨骨折切开复位钢针内固定术;石膏绷带固定;皮肤和皮下组织非切除性清创
1747	D07儿童骨科、骨盆外科	2022-05-12	2022-05-22	3227735	李杨凤	女	67Y	股骨粗隆间骨折		好转	孔建中	陈墨川	方文来	股骨骨折切开复位钢丝内固定术
1748	D07儿童骨科、骨盆外科	2022-05-18	2022-05-23	3227817	李泽政	男	1Y	股骨干骨折		好转	张敬东	李玉安	方明桥	石膏绷带固定;股骨骨折闭合复位术
1749	D07儿童骨科、骨盆外科	2022-05-10	2022-05-23	3227910	林兴旺	男	85Y	股骨颈骨折	肺结节;高血压病;后天性肾囊肿;肝囊肿;肝硬化;房性早搏;尿毒症;2型糖尿病	好转	孔建中	陈墨川	方文来	人工股骨头置换术
1750	D07儿童骨科、骨盆外科	2022-05-12	2022-05-23	3227912	孔万处	男	83Y	股骨颈骨折	肾结石;后天性肾囊肿;下肢动脉粥样硬化	治愈	翁益民	翁益民	王特	人工股骨头置换术
1751	D07儿童骨科、骨盆外科	2022-05-17	2022-05-23	3227932	董建国	男	11Y	掌骨骨折		治愈	张敬东	李玉安	方明桥	掌骨骨折切开复位钢针内固定术
1752	D07儿童骨科、骨盆外科	2022-05-08	2022-05-23	3227939	季山蕊	女	82Y	股骨下端骨折	冠状动脉支架植入后状态;脂肪肝;下肢动脉粥样硬化;高血压病	治愈	翁益民	翁益民	王特	股骨人工骨植骨术;股骨骨折切开复位钢板内固定术
1753	D07儿童骨科、骨盆外科	2022-05-21	2022-05-23	3227953	陈上海	男	1Y	肱骨髁上骨折		治愈	张敬东	易先宏	方明桥	肱骨骨折闭合复位钢针内固定术
1754	D07儿童骨科、骨盆外科	2022-05-16	2022-05-23	3227965	万栩慧	女	11Y	开放性指骨骨折	开放性手指损伤伴指甲损害;浅表损伤	治愈	张敬东	李玉安	方明桥	指骨骨折闭合复位钢针内固定术;皮肤缝合术
1755	D07儿童骨科、骨盆外科	2022-05-18	2022-05-23	3227985	邹记民	男	3Y	肱骨髁上骨折	轻度贫血;吸入性肺炎	好转	张敬东	李玉安	方明桥	肱骨骨折闭合复位钢针内固定术;石膏绷带固定
1756	D07儿童骨科、骨盆外科	2022-05-19	2022-05-24	3228396	潘迦忆	男	8Y	桡骨颈骨折	尺骨上端骨折	好转	张敬东	李玉安	方明桥	桡骨骨折闭合复位髓内针内固定术
1757	D07儿童骨科、骨盆外科	2022-05-18	2022-05-24	3228399	王梓	女	5Y	肱骨外髁骨折		好转	张敬东	李玉安	闫广奎	肱骨骨折切开复位钢针内固定术
1758	D07儿童骨科、骨盆外科	2022-05-19	2022-05-24	3228401	周家宝	男	4Y	肱骨上端骨折		治愈	张敬东	李玉安	方明桥	肱骨骨折闭合复位髓内针内固定术
1759	D07儿童骨科、骨盆外科	2022-05-23	2022-05-24	3228534	井彬	男	7Y	锁骨骨折		好转	张敬东	李玉安	方明桥
1760	D07儿童骨科、骨盆外科	2022-03-21	2022-05-24	3228601	吴克锋	男	42Y	胫骨上端骨折	外踝骨折;髌骨骨折;脂肪肝	治愈	孔建中	陈墨川	方文来	胫骨骨折切开复位钢板内固定术;创面负压封闭引流[VSD]
1761	D07儿童骨科、骨盆外科	2022-05-21	2022-05-25	3228804	徐新豪	男	10Y	肱骨髁上骨折		好转	张敬东	闫广奎	闫广奎	肱骨骨折闭合复位钢针内固定术
1762	D07儿童骨科、骨盆外科	2022-05-21	2022-05-25	3228844	刘恩惠	女	2Y	肱骨外髁骨折		好转	张敬东	易先宏	闫广奎	肱骨骨折闭合复位钢针内固定术
1763	D07儿童骨科、骨盆外科	2022-05-23	2022-05-25	3228857	陈豪	男	6Y	尺骨下端骨折	桡骨骨折	好转	张敬东	易先宏	闫广奎
1764	D07儿童骨科、骨盆外科	2022-05-12	2022-05-25	3228969	王德荣	男	36Y	股骨粗隆下骨折	头皮挫伤;肝功能异常;肝病	好转	孔建中	陈墨川	方文来	股骨骨折切开复位髓内针内固定术
1765	D07儿童骨科、骨盆外科	2022-05-11	2022-05-25	3228971	郑贴福	男	37Y	股骨粗隆下骨折	头部多处浅表损伤	好转	翁益民	翁益民	王特	股骨骨折闭合复位髓内针内固定术
1766	D07儿童骨科、骨盆外科	2022-05-14	2022-05-25	3229020	赵万荣	男	62Y	特指跗骨骨折	下肢动脉粥样硬化;足背动脉损伤;足部皮肤撕裂伤;小腿水平腓神经损伤;趾伸肌腱断裂;前列腺结石;前列腺增生	好转	翁益民	翁益民	王特	跗骨开放性骨折清创术;创面负压封闭引流[VSD]
1767	D07儿童骨科、骨盆外科	2022-05-23	2022-05-25	3229045	黄以安	男	42Y	取除骨折内固定装置	肺纤维化;前列腺结石;脂肪肝;肝血管瘤	其他	翁益民	翁益民	王特	指骨内固定物取出术
1768	D07儿童骨科、骨盆外科	2022-05-14	2022-05-26	3229083	陈永园	男	47Y	股骨粗隆下骨折	脂肪肝	好转	孔建中	陈墨川	方文来	股骨骨折闭合复位髓内针内固定术
1769	D07儿童骨科、骨盆外科	2022-05-21	2022-05-26	3229194	徐伊昕	女	4Y	肱骨外髁骨折		好转	张敬东	李玉安	闫广奎	肱骨骨折切开复位钢针内固定术;关节软骨修复术
1770	D07儿童骨科、骨盆外科	2022-05-23	2022-05-26	3229287	张倚诚	男	9Y	肱骨髁上骨折	上臂神经损伤	治愈	张敬东	闫广奎	方明桥	肱骨骨折闭合复位钢针内固定术;石膏绷带固定
1771	D07儿童骨科、骨盆外科	2022-05-22	2022-05-27	3229499	李祖豪	男	12Y	第一掌骨骨折	掌骨骨折;尺骨骨折	治愈	张敬东	李玉安	方明桥	掌骨骨折闭合复位钢针内固定术;石膏绷带固定
1772	D07儿童骨科、骨盆外科	2022-05-25	2022-05-28	3229659	王佳馨	女	4Y	肱骨髁上骨折		好转	张敬东	闫广奎	王伟	肱骨骨折闭合复位螺钉内固定术
1773	D07儿童骨科、骨盆外科	2022-05-25	2022-05-28	3229662	周扬	男	4Y	肱骨髁上骨折		治愈	张敬东	王伟	方明桥	肱骨骨折闭合复位螺钉内固定术
1774	D07儿童骨科、骨盆外科	2022-05-23	2022-05-28	3229676	李时钊	男	13Y	取除骨折内固定装置	成骨不全;创伤后伤口感染	其他	张敬东	闫广奎	方明桥	尺骨内固定物取出术
1775	D07儿童骨科、骨盆外科	2022-05-12	2022-05-28	3229705	董海	男	44Y	胫骨骨折	多发性膝关节损伤;闭合性胫骨平台骨折;高血压病	好转	孔建中	陈墨川	方文来	胫骨骨折闭合复位髓内针内固定术
1776	D07儿童骨科、骨盆外科	2022-05-22	2022-05-28	3229738	潘春莲	女	66Y	股骨颈骨折	肺结节	好转	孔建中	陈墨川	方文来	股骨骨折闭合复位螺钉内固定术
1777	D07儿童骨科、骨盆外科	2022-05-15	2022-05-28	3229951	罗顺弟	男	86Y	股骨颈骨折	下肢动脉粥样硬化;心房颤动;肺结节病;室性早搏;肺气肿;心脏瓣膜病	治愈	孔建中	陈墨川	方文来	人工股骨头置换术
1778	D07儿童骨科、骨盆外科	2022-05-23	2022-05-29	3230051	蔡文斌	男	38Y	取除骨折内固定装置	肝内胆管结石;前列腺结石;脂肪肝	其他	翁益民	翁益民	王特	胫骨内固定物取出术
1779	D07儿童骨科、骨盆外科	2022-05-24	2022-05-29	3230174	杨过	男	1Y	股骨骨折		好转	张敬东	闫广奎	闫广奎	股骨骨折闭合复位术;石膏夹板固定
1780	D07儿童骨科、骨盆外科	2022-05-27	2022-05-29	3230180	洪兰心	女	1Y	肱骨髁上骨折		好转	张敬东	毛诚晃	闫广奎	肱骨骨折闭合复位钢针内固定术
1781	D07儿童骨科、骨盆外科	2022-05-23	2022-05-29	3230198	袁新朋	男	4Y	肱骨内髁骨折		好转	张敬东	闫广奎	闫广奎	肱骨骨折切开复位钢针内固定术;上肢关节囊缝合术
1782	D07儿童骨科、骨盆外科	2022-05-24	2022-05-29	3230208	邓萧溢	男	12Y	内踝骨折	腓骨干骨折	好转	张敬东	李玉安	闫广奎	踝关节骨折闭合复位螺钉内固定术
1783	D07儿童骨科、骨盆外科	2022-04-27	2022-05-29	3230214	代华桥	男	20Y	开放性跖骨骨折	窦性心律失常;足特指部位脱位;楔状骨骨折(足);足部皮肤撕裂伤;坏疽	好转	孔建中	陈墨川	方文来	创面负压封闭引流[VSD];跗跖关节脱位切开复位术;跖骨开放性骨折清创术;跖骨骨折切开复位钢板内固定术
1784	D07儿童骨科、骨盆外科	2022-05-19	2022-05-29	3230280	曾秀琴	女	60Y	跖骨骨折	足部皮肤撕裂伤;胆囊息肉;足拇长伸肌腱断裂;足特指部位脱位;楔状骨骨折(足)	好转	翁益民	翁益民	王特	创面负压封闭引流[VSD];皮肤和皮下坏死组织切除清创术;(足母)长伸肌腱缝合术
1785	D07儿童骨科、骨盆外科	2022-05-18	2022-05-30	3230519	姚玥	女	7Y	开放性手指损伤伴指甲损害	桡骨下端骨折;创伤性骨筋膜室综合征	好转	张敬东	闫广奎	闫广奎	手肌腱、血管、神经探查术;皮肤和皮下坏死组织切除清创术;筋膜间隙切开减压术;创面负压封闭引流[VSD];皮肤缝合术;石膏绷带固定
1786	D07儿童骨科、骨盆外科	2022-05-28	2022-05-30	3230525	陈昊诚	男	5Y	肱骨髁上骨折		好转	张敬东	闫广奎	闫广奎	肱骨骨折闭合复位钢针内固定术
1787	D07儿童骨科、骨盆外科	2022-05-26	2022-05-30	3230588	何易轩	男	10Y	取除骨折内固定装置		其他	张敬东	易先宏	闫广奎	尺骨内固定物取出术;桡骨内固定物取出术
1788	D07儿童骨科、骨盆外科	2022-05-17	2022-05-30	3230590	徐松有	男	64Y	闭合性胫骨平台骨折	下肢动脉粥样硬化	治愈	孔建中	陈墨川	方文来	胫骨骨折切开复位钢板内固定术
1789	D07儿童骨科、骨盆外科	2022-05-18	2022-05-30	3230594	李桂金	女	61Y	取除骨折内固定装置	下肢动脉粥样硬化;脂肪肝;陈旧性腓骨骨折	其他	孔建中	陈墨川	方文来	胫骨内固定物取出术
1790	D07儿童骨科、骨盆外科	2022-05-21	2022-05-30	3230606	唐春生	男	41Y	锁骨骨折	多处挫伤;肺部感染;慢性上颌窦炎	好转	翁益民	翁益民	王特	锁骨骨折切开复位钢板内固定术
1791	D07儿童骨科、骨盆外科	2022-05-25	2022-05-30	3230765	邢健乐	男	8Y	肱骨外髁骨折	鹰嘴骨折	治愈	翁益民	翁益民	王特	肱骨骨折闭合复位钢针内固定术
1792	D07儿童骨科、骨盆外科	2022-05-26	2022-05-31	3230958	勾龙威	男	10Y	蒙特贾骨折脱位		好转	张敬东	毛诚晃	闫广奎	尺骨骨折闭合复位钢针内固定术
1793	D07儿童骨科、骨盆外科	2022-05-18	2022-05-31	3230963	林欣然	女	4Y	股骨骨折	胫骨骨折	好转	张敬东	闫广奎	闫广奎	股骨骨折切开复位髓内针内固定术;胫骨骨折切开复位髓内针内固定术
1794	D07儿童骨科、骨盆外科	2022-05-24	2022-05-31	3230965	胡博涵	男	6Y	肱骨髁上骨折	前臂神经损伤	好转	张敬东	李玉安	闫广奎	肱骨骨折闭合复位钢针内固定术
1795	D07儿童骨科、骨盆外科	2022-05-12	2022-05-31	3230970	吴明辽	男	81Y	股骨颈骨折	后天性肾囊肿;胃部分后天性缺失;高血压病;下肢动脉粥样硬化;冠状动脉粥样硬化性心脏病;肝囊肿;老年性脑萎缩;腔隙性脑梗死	好转	翁益民	翁益民	王特	陶瓷-聚乙烯髋关节置换;人工股骨头置换术
1796	D07儿童骨科、骨盆外科	2022-05-28	2022-06-01	3231307	章飘飘	女	13Y	取除骨折内固定装置		其他	张敬东	李玉安	毛诚晃	胫骨内固定物取出术
1797	D07儿童骨科、骨盆外科	2022-05-30	2022-06-01	3231358	柴希涵	女	3Y	肱骨髁上骨折		好转	张敬东	闫广奎	闫广奎	肱骨骨折切开复位钢针内固定术
1798	D07儿童骨科、骨盆外科	2022-05-29	2022-06-01	3231520	章维壹	男	5Y	肱骨髁上骨折		治愈	翁益民	翁益民	项光恒	肱骨骨折切开复位空心钉内固定术
1799	D07儿童骨科、骨盆外科	2022-05-28	2022-06-02	3231665	叶泽芳	男	3Y	取除骨折内固定装置		其他	张敬东	李玉安	闫广奎	股骨内固定物取出术
1800	D07儿童骨科、骨盆外科	2022-05-28	2022-06-02	3231670	周欣雅	女	4Y	开放性肱骨下端骨折		治愈	张敬东	李玉安	王伟	肱骨骨折切开复位钢针内固定术
1801	D07儿童骨科、骨盆外科	2022-05-24	2022-06-02	3231676	陈迦豪	男	7Y	胫腓骨干骨折		治愈	张敬东	李玉安	方明桥	胫骨骨折切开复位螺钉内固定术
1802	D07儿童骨科、骨盆外科	2022-05-18	2022-06-02	3231688	潘高锐	男	56Y	跖骨骨折	骰骨骨折;脂肪肝	好转	孔建中	陈墨川	方文来	跖骨螺钉内固定术;趾骨骨折切开复位螺钉内固定术
1803	D07儿童骨科、骨盆外科	2022-05-18	2022-06-02	3231698	叶银友	男	65Y	闭合性胫骨平台骨折	后天性肾囊肿;肾结石;老年性心脏病;高血压病;前列腺增生	治愈	孔建中	陈墨川	方文来	胫骨骨折切开复位螺钉内固定术;关节软骨修复术
1804	D07儿童骨科、骨盆外科	2022-05-24	2022-06-02	3231820	郑月英	女	78Y	股骨粗隆间骨折	后天性肾囊肿;下肢动脉粥样硬化;高血压病;肺部感染;肺大泡	治愈	翁益民	翁益民	项光恒	股骨骨折闭合复位髓内针内固定术
1805	D07儿童骨科、骨盆外科	2022-05-21	2022-06-03	3232055	自梦悦	女	3Y	股骨骨折	肝损伤;心脏特指损伤;肺挫伤;胸腔积液	好转	张敬东	闫广奎	方明桥	股骨骨折切开复位髓内针内固定术
1806	D07儿童骨科、骨盆外科	2022-05-29	2022-06-04	3232192	吕杨建	男	5Y	取除骨折内固定装置		其他	张敬东	李玉安	李玉安	股骨内固定物取出术
1807	D07儿童骨科、骨盆外科	2022-05-31	2022-06-04	3232199	郭梓龙	男	4Y	取除骨折内固定装置		其他	张敬东	李玉安	李玉安	股骨内固定物取出术
1808	D07儿童骨科、骨盆外科	2022-06-01	2022-06-04	3232205	沈益箴	男	8Y	肱骨髁上骨折		好转	张敬东	李玉安	闫广奎	肱骨骨折切开复位髓内针内固定术
1809	D07儿童骨科、骨盆外科	2022-05-29	2022-06-04	3232207	焦宇辉	男	14Y	取除骨折内固定装置		其他	张敬东	李玉安	李玉安	股骨内固定物取出术
1810	D07儿童骨科、骨盆外科	2022-05-29	2022-06-04	3232231	汤甜甜	女	14Y	胫骨骨折	脊柱侧弯	治愈	张敬东	李玉安	李玉安	胫骨骨折切开复位髓内针内固定术
1811	D07儿童骨科、骨盆外科	2022-06-02	2022-06-04	3232271	郭辰皙	女	1Y	肱骨髁上骨折		治愈	张敬东	闫广奎	王伟	肱骨骨折切开复位髓内针内固定术
1812	D07儿童骨科、骨盆外科	2022-05-19	2022-06-04	3232296	王慕心	女	4Y	肝损伤	胰损伤;皮肤挫伤;肱骨骨折;腹水	好转	张敬东	闫广奎	毛诚晃	肱骨骨折切开复位髓内针内固定术
1813	D07儿童骨科、骨盆外科	2022-05-28	2022-06-04	3232319	金小玉	女	62Y	肱骨外科颈骨折	高血压病;心脏瓣膜病;血管瘤	好转	孔建中	陈墨川	方文来	肱骨骨折切开复位钢针内固定术
1814	D07儿童骨科、骨盆外科	2022-05-25	2022-06-04	3232329	邵小兰	女	58Y	股骨颈骨折	下肢动脉粥样硬化;高血压病;2型糖尿病;胸腔积液;陈旧性肺结核	治愈	翁益民	翁益民	项光恒	股骨骨折闭合复位螺钉内固定术
1815	D07儿童骨科、骨盆外科	2022-05-30	2022-06-04	3232496	徐勋旺	男	50Y	取除骨折内固定装置	血管瘤	其他	翁益民	翁益民	项光恒	踝关节内固定物取出术
1816	D07儿童骨科、骨盆外科	2022-05-24	2022-06-04	3232534	张福良	男	76Y	股骨干骨折	肝囊肿;精神分裂症;后天性肾囊肿;胆囊结石;下肢动脉粥样硬化	治愈	翁益民	翁益民	项光恒	股骨内固定物取出术;股骨骨折闭合复位螺钉内固定术
1817	D07儿童骨科、骨盆外科	2022-05-25	2022-06-05	3232695	姚凤玉	女	87Y	锁骨骨折	多发性肋骨骨折;肾结石;下肢动脉粥样硬化;老年性心脏病;高血压病;房性早搏;胸椎骨折;骨质疏松;肝囊肿	好转	孔建中	陈墨川	方文来	锁骨骨折切开复位钢板内固定术;经皮穿刺椎体成形术
1818	D07儿童骨科、骨盆外科	2022-05-30	2022-06-05	3232702	杨露	男	36Y	股骨干骨折	高血压病	好转	孔建中	陈墨川	方文来	股骨骨折闭合复位髓内针内固定术
1819	D07儿童骨科、骨盆外科	2022-06-01	2022-06-05	3232708	章宇哲	男	5Y	肱骨髁上骨折	尺骨桡骨闭合性骨折	治愈	张敬东	李玉安	闫广奎	石膏绷带固定;尺骨骨折闭合复位髓内针内固定术;肱骨骨折闭合复位髓内针内固定术
1820	D07儿童骨科、骨盆外科	2022-05-25	2022-06-05	3232878	陈淑建	男	50Y	胫骨骨折	腓骨骨折;前列腺增生;肝囊肿;脂肪肝;糖尿病	好转	孔建中	陈墨川	方文来	胫骨骨折切开复位螺钉内固定术
1821	D07儿童骨科、骨盆外科	2022-05-30	2022-06-06	3233086	张瑾	男	11Y	尺骨桡骨闭合性骨折		治愈	张敬东	李玉安	王伟	桡骨骨折切开复位螺钉内固定术;尺骨骨折切开复位髓内针内固定术
1822	D07儿童骨科、骨盆外科	2022-06-03	2022-06-06	3233098	卢博宇	男	1Y	肱骨髁上骨折		治愈	张敬东	李玉安	李玉安	肱骨骨折切开复位空心钉内固定术
1823	D07儿童骨科、骨盆外科	2022-05-24	2022-06-06	3233142	卢明友	男	49Y	胫骨上端骨折	肝炎后肝硬化;乙型肝炎小三阳;肝功能异常;皮肤挫伤	好转	孔建中	陈墨川	方文来	胫骨骨折切开复位钢板内固定术
1824	D07儿童骨科、骨盆外科	2022-06-04	2022-06-06	3233145	林以乐	男	3Y	肱骨髁上骨折	上肢神经损伤	治愈	张敬东	李玉安	闫广奎	肱骨骨折切开复位髓内针内固定术;石膏绷带固定
1825	D07儿童骨科、骨盆外科	2022-05-30	2022-06-06	3233232	蔡月兰	女	75Y	股骨颈骨折	高血压病;肺结节;胆囊结石	好转	孔建中	陈墨川	方文来	金属-聚乙烯髋关节置换;髋关节松解术;全髋关节置换术
1826	D07儿童骨科、骨盆外科	2022-06-03	2022-06-07	3233385	陈君浩	男	7Y	肱骨髁上骨折		治愈	张敬东	李玉安	李玉安	肱骨骨折闭合复位髓内针内固定术
1827	D07儿童骨科、骨盆外科	2022-05-29	2022-06-07	3233495	瞿远胜	男	62Y	踝骨闭合性骨折	脂肪肝	好转	孔建中	陈墨川	方文来	肱骨骨折切开复位髓内针内固定术
1828	D07儿童骨科、骨盆外科	2022-05-25	2022-06-07	3233498	张秀莲	女	52Y	股骨颈骨折	高血压病;血管瘤	治愈	翁益民	翁益民	项光恒	股骨骨折闭合复位髓内针内固定术
1829	D07儿童骨科、骨盆外科	2022-05-31	2022-06-07	3233525	方梓妍	女	6Y	肱骨外髁骨折		治愈	张敬东	李玉安	王伟	肱骨骨折切开复位髓内针内固定术
1830	D07儿童骨科、骨盆外科	2022-06-02	2022-06-08	3233925	卓玥希	女	5Y	取除骨折内固定装置		其他	张敬东	李玉安	李玉安	股骨内固定物取出术
1831	D07儿童骨科、骨盆外科	2022-06-02	2022-06-08	3233965	叶雨彤	女	7Y	肱骨上端骨折	足挫伤	治愈	张敬东	李玉安	毛诚晃	肱骨骨折切开复位髓内针内固定术;石膏绷带固定
1832	D07儿童骨科、骨盆外科	2022-05-31	2022-06-08	3233969	王家博	男	4Y	腕和手水平肌肉和肌腱损伤	掌骨骨折;肱骨下端骨折	好转	张敬东	王伟	闫广奎	肌腱、血管、神经探查术;甲床清创术;石膏夹板固定;掌骨开放性骨折清创术
1833	D07儿童骨科、骨盆外科	2022-06-07	2022-06-08	3234063	金子昂	男	2Y	尺骨桡骨闭合性骨折		治愈	张敬东	李玉安	方明桥	石膏夹板固定
1834	D07儿童骨科、骨盆外科	2022-05-29	2022-06-09	3234289	黄彩英	女	60Y	髌骨骨折	高血压病	治愈	孔建中	陈墨川	方文来	髌骨骨折切开复位张力带钢丝内固定术;关节软骨修复术;股四头肌缝合术
1835	D07儿童骨科、骨盆外科	2022-06-07	2022-06-09	3234347	叶朵	女	2Y	肱骨髁上骨折	上臂神经损伤	治愈	张敬东	李玉安	闫广奎	肱骨骨折闭合复位螺钉内固定术
1836	D07儿童骨科、骨盆外科	2022-06-04	2022-06-10	3234330	董欣语	女	8Y	桡骨颈骨折		治愈	张敬东	李玉安	李玉安	桡骨骨折切开复位髓内针内固定术
1837	D07儿童骨科、骨盆外科	2022-05-23	2022-06-10	3234624	王温洋	男	13Y	胫骨上端骨折	四头肌和肌腱损伤	治愈	张敬东	李玉安	方明桥	股四头肌缝合术;胫骨骨折切开复位髓内针内固定术
1838	D07儿童骨科、骨盆外科	2022-06-06	2022-06-11	3234864	徐贤云	男	58Y	取除骨折内固定装置	陈旧性腓骨骨折;前列腺结石;脂肪肝	其他	翁益民	翁益民	项光恒	踝关节内固定物取出术
1839	D07儿童骨科、骨盆外科	2022-06-04	2022-06-11	3234872	诸佳琦	女	12Y	肱骨外科颈骨折	桡骨下端骨折	治愈	张敬东	李玉安	王伟	肱骨骨折闭合复位髓内针内固定术;桡骨骨折闭合复位髓内针内固定术
1840	D07儿童骨科、骨盆外科	2022-05-31	2022-06-11	3234874	胡银媛	女	102Y	股骨粗隆间骨折	胆囊息肉;肺结节;老年性心脏病;高血压病	治愈	孔建中	陈墨川	方文来	股骨骨折闭合复位螺钉内固定术
1841	D07儿童骨科、骨盆外科	2022-06-03	2022-06-11	3234876	付思睿	男	2Y	腕和手水平特指手指伸肌和肌腱损伤	特指指骨骨折;开放性腕和手特指部位损伤	好转	张敬东	李玉安	毛诚晃	伸指肌腱缝合术;指骨骨折切开复位钢针内固定术;手肌腱、血管、神经探查术
1842	D07儿童骨科、骨盆外科	2022-06-02	2022-06-11	3234883	冉林晞	女	4Y	开放性胫腓骨干骨折		治愈	张敬东	李玉安	方明桥	腓骨骨折闭合复位髓内针内固定术
1843	D07儿童骨科、骨盆外科	2022-05-29	2022-06-11	3234887	赵仁秋	男	52Y	膝关节副韧带扭伤	股骨下端骨折;尾骨骨折;高血压病;脂肪肝	好转	孔建中	陈墨川	方文来	副韧带修补术;股骨内固定物取出术
1844	D07儿童骨科、骨盆外科	2022-06-05	2022-06-11	3234891	诸德顺	男	66Y	锁骨骨折	先天性单侧肾缺如;胆囊结石;下肢动脉粥样硬化;特指听觉异常;2型糖尿病;肝囊肿;脂肪肝	好转	孔建中	陈墨川	方文来	锁骨骨折切开复位钢针内固定术
1845	D07儿童骨科、骨盆外科	2022-06-04	2022-06-11	3234973	陈三连	女	55Y	胫骨上端骨折	肾结石;脂肪肝	好转	孔建中	陈墨川	方文来	胫骨骨折切开复位钢针内固定术
1846	D07儿童骨科、骨盆外科	2022-05-19	2022-06-11	3235022	张正祥	男	57Y	创伤性一只足和另一小腿切断	足骨折;开放性内踝骨折;足挤压伤;腓骨骨折;脂肪肝;气胸;踝内侧副韧带损伤	好转	翁益民	翁益民	项光恒	创面负压封闭引流[VSD];腓骨骨折切开复位髓内针内固定术;跗跖关节脱位切开复位术;踝关节骨折切开复位钢针内固定术;韧带修补术;关节软骨修复术;甲床清创术;甲成形术
1847	D07儿童骨科、骨盆外科	2022-06-02	2022-06-11	3235092	方理素	女	49Y	闭合性胫骨平台骨折	高血压病;腓骨骨折	好转	孔建中	陈墨川	方文来	胫骨骨折切开复位钢针内固定术;关节软骨修复术
1848	D07儿童骨科、骨盆外科	2022-06-05	2022-06-12	3235258	王奥杨	男	9Y	特指指骨骨折	腕和手水平肌肉和肌腱损伤;特指手指指神经损伤	治愈	张敬东	李玉安	毛诚晃	指骨骨折切开复位钢针内固定术;手肌腱、血管、神经探查术;指骨开放性骨折清创术
1849	D07儿童骨科、骨盆外科	2022-06-09	2022-06-12	3235310	徐宗锐	男	6Y	肱骨髁上骨折		治愈	张敬东	李玉安	毛诚晃	肱骨骨折切开复位钢针内固定术
1850	D07儿童骨科、骨盆外科	2022-06-01	2022-06-13	3235710	陈星烨	女	12Y	取除骨折内固定装置		其他	张敬东	李玉安	王伟	股骨内固定物取出术
1851	D07儿童骨科、骨盆外科	2022-06-02	2022-06-13	3235712	张宇柔	女	2Y	开放性胫腓骨干骨折		治愈	张敬东	闫广奎	毛诚晃
1852	D07儿童骨科、骨盆外科	2022-06-01	2022-06-13	3235875	陈胜忠	男	37Y	跟骨骨折	下肢动脉粥样硬化;肝回声不均	治愈	翁益民	翁益民	项光恒	跟骨骨折切开复位钢板内固定术
1853	D07儿童骨科、骨盆外科	2022-06-06	2022-06-14	3236066	吴月芬	女	59Y	鹰嘴骨折	肝囊肿	治愈	孔建中	陈墨川	方文来	尺骨骨折切开复位钢针内固定术
1854	D07儿童骨科、骨盆外科	2022-06-09	2022-06-14	3236132	王曦乐	女	7Y	肱骨髁上骨折		治愈	张敬东	李玉安	王伟	肱骨骨折切开复位空心钉内固定术
1855	D07儿童骨科、骨盆外科	2022-06-07	2022-06-15	3236449	包衍文	男	67Y	股骨粗隆间骨折	多发性肝囊肿;下肢动脉粥样硬化;高血压病;前列腺结石	好转	孔建中	陈墨川	方文来	股骨骨折切开复位钢针内固定术
1856	D07儿童骨科、骨盆外科	2022-06-06	2022-06-15	3236467	黄庆法	男	53Y	取除骨折内固定装置	特指肾盂积水;肾结石伴输尿管结石	其他	翁益民	翁益民	项光恒	胫骨内固定物取出术
1857	D07儿童骨科、骨盆外科	2022-05-30	2022-06-15	3236618	郑晓勇	男	37Y	股骨骨折	脂肪肝	治愈	翁益民	翁益民	项光恒	股骨骨折切开复位钢针内固定术
1858	D07儿童骨科、骨盆外科	2022-06-05	2022-06-15	3236622	周文卫	男	51Y	取除骨折内固定装置	前列腺结石;肝囊肿	其他	翁益民	翁益民	项光恒	胫骨内固定物取出术
1859	D07儿童骨科、骨盆外科	2022-06-06	2022-06-15	3236625	虞浩然	男	5Y	尺骨桡骨闭合性骨折		治愈	张敬东	李玉安	李玉安	尺骨骨折闭合复位钢针内固定术;桡骨骨折闭合复位钢针内固定术
1860	D07儿童骨科、骨盆外科	2022-06-13	2022-06-16	3236955	胡俊杰	男	7Y	肱骨髁上骨折		治愈	张敬东	李玉安	闫广奎	肱骨骨折闭合复位钢针内固定术
1861	D07儿童骨科、骨盆外科	2022-06-07	2022-06-16	3236964	邱娟娟	女	34Y	取除骨折内固定装置	脂肪肝	其他	翁益民	翁益民	项光恒	股骨内固定物取出术
1862	D07儿童骨科、骨盆外科	2022-06-11	2022-06-16	3236967	黄浩钧	男	1Y	鹰嘴骨折		治愈	张敬东	李玉安	李玉安	尺骨骨折切开复位钢针内固定术
1863	D07儿童骨科、骨盆外科	2022-06-06	2022-06-16	3237189	陈仁山	男	44Y	跟骨骨折	肝回声不均;肾结石	治愈	翁益民	翁益民	项光恒	跟骨骨折切开复位钢针内固定术;关节软骨修复术;跟骨骨折闭合复位钢针内固定术
1864	D07儿童骨科、骨盆外科	2022-06-11	2022-06-17	3237314	曾清辉	男	6Y	肱骨髁上骨折		治愈	张敬东	李玉安	毛诚晃	肱骨骨折闭合复位钢针内固定术
1865	D07儿童骨科、骨盆外科	2022-06-11	2022-06-17	3237353	廖理道	男	60Y	腰椎骨折	陈旧性腰椎骨折;后天性肾囊肿;陈旧性胸椎骨折;外踝骨折;肋骨骨折;骨质疏松	治愈	徐晖	王胜	陈教想	腰椎骨折球囊扩张成形术
1866	D07儿童骨科、骨盆外科	2022-06-15	2022-06-18	3237552	余俊辰	男	3Y	肱骨髁上骨折		治愈	张敬东	李玉安	方明桥	肱骨骨折闭合复位钢针内固定术
1867	D07儿童骨科、骨盆外科	2022-06-14	2022-06-18	3237609	袁菲	女	2Y	肱骨髁上骨折	前臂桡神经损伤	治愈	张敬东	李玉安	毛诚晃	肱骨骨折闭合复位钢针内固定术
1868	D07儿童骨科、骨盆外科	2022-06-12	2022-06-18	3237612	林天情	女	12Y	鹰嘴骨折		治愈	张敬东	李玉安	毛诚晃	尺骨骨折切开复位钢针内固定术
1869	D07儿童骨科、骨盆外科	2022-06-12	2022-06-19	3237917	王一汐	女	1Y	肱骨外髁骨折		治愈	张敬东	李玉安	毛诚晃	肱骨骨折切开复位钢针内固定术
1870	D07儿童骨科、骨盆外科	2022-06-06	2022-06-19	3237923	梅少容	女	68Y	股骨颈骨折	脂肪肝;脑出血个人史;下肢动脉粥样硬化;高血压病	好转	孔建中	陈墨川	方文来	全髋关节置换术;髋关节松解术
1871	D07儿童骨科、骨盆外科	2022-06-12	2022-06-19	3237944	黄明豪	男	9Y	特指趾骨骨折	开放性足损伤;下肢肌腱损伤	治愈	张敬东	李玉安	毛诚晃	肌腱、血管、神经探查术;石膏夹板固定;趾骨骨折切开复位钢针内固定术;皮肤和皮下组织非切除性清创;肌腱固定术
1872	D07儿童骨科、骨盆外科	2022-06-11	2022-06-19	3237954	林思宇	女	11Y	踝骨闭合性骨折	腓骨骨折	治愈	张敬东	李玉安	方明桥
1873	D07儿童骨科、骨盆外科	2022-06-13	2022-06-19	3237985	蔡春英	女	60Y	取除骨折内固定装置	后天性肾囊肿;肾结石;2型糖尿病;高血压病;胆囊胆固醇沉着症	其他	翁益民	翁益民	项光恒	胫骨内固定物取出术
1874	D07儿童骨科、骨盆外科	2022-06-18	2022-06-19	3238107	王锦航	男	8Y	尺骨桡骨闭合性骨折		治愈	张敬东	李玉安	方明桥
1875	D07儿童骨科、骨盆外科	2022-06-10	2022-06-20	3238333	夏雨函	男	11Y	股骨粗隆下骨折		治愈	张敬东	李玉安	毛诚晃	股骨骨折切开复位髓内针内固定术
1876	D07儿童骨科、骨盆外科	2022-06-08	2022-06-20	3238339	赵顺利	男	43Y	髌骨骨折	心动过缓;2型糖尿病;脂肪肝;肺大泡	好转	孔建中	陈墨川	方文来	髌骨骨折切开复位张力带钢丝内固定术;关节软骨修复术
1877	D07儿童骨科、骨盆外科	2022-06-18	2022-06-20	3238355	董文谦	男	61Y	肩胛骨骨折	高血压病;糖尿病	好转	杨雷	周一飞	张月雷
1878	D07儿童骨科、骨盆外科	2022-06-10	2022-06-21	3237948	宋钶婷	女	11Y	胫腓骨下端骨折	小腿开放性损伤	治愈	张敬东	李玉安	毛诚晃	胫骨骨折切开复位钢板内固定术
1879	D07儿童骨科、骨盆外科	2022-06-11	2022-06-21	3238705	谢胜峰	男	13Y	胫骨骨折		治愈	翁益民	翁益民	项光恒	胫骨骨折切开复位钢板内固定术
1880	D07儿童骨科、骨盆外科	2022-06-16	2022-06-21	3238709	黄书铄	男	1Y	股骨骨折		治愈	张敬东	李玉安	毛诚晃	股骨骨折闭合复位术;石膏夹板固定
1881	D07儿童骨科、骨盆外科	2022-06-13	2022-06-21	3238716	陈荣化	男	44Y	取除骨折内固定装置	脊髓灰质炎后遗症;前列腺结石;脂肪肝	其他	翁益民	翁益民	项光恒	股骨内固定物取出术;髌骨内固定物取出术
1882	D07儿童骨科、骨盆外科	2022-06-19	2022-06-21	3238730	陈孝渤	男	4Y	肱骨髁上骨折		治愈	张敬东	李玉安	毛诚晃	肱骨骨折闭合复位钢针内固定术
1883	D07儿童骨科、骨盆外科	2022-06-16	2022-06-21	3238810	张宇乐	男	1Y	指骨骨折	腕和手水平拇指伸肌和肌腱损伤;开放性手指损伤不伴指甲损害	治愈	张敬东	李玉安	方明桥	指骨骨折切开复位钢针内固定术;拇长伸肌腱缝合术;手肌腱、血管、神经探查术
1884	D07儿童骨科、骨盆外科	2022-06-05	2022-06-21	3238881	朱云珠	女	59Y	髋臼骨折	后天性肾囊肿;肾结石;下肢动脉粥样硬化;主动脉瓣关闭不全;高血压病;股骨颈骨折	好转	孔建中	陈墨川	方文来	髋骨骨折切开复位螺钉内固定术;关节软骨修复术
1885	D07儿童骨科、骨盆外科	2022-06-01	2022-06-22	3237921	朱阿丁	女	86Y	股骨颈骨折	尿潴留;主动脉瓣关闭不全;Ⅰ度房室传导阻滞;后天性肾囊肿;原发性肺动脉高压	好转	孔建中	陈墨川	方文来	人工股骨头置换术
1886	D07儿童骨科、骨盆外科	2022-06-18	2022-06-22	3239005	陈鹏安	男	10Y	肱骨外髁骨折		治愈	张敬东	李玉安	方明桥	肱骨骨折闭合复位钢针内固定术
1887	D07儿童骨科、骨盆外科	2022-06-17	2022-06-22	3239057	连志辉	男	10Y	肱骨髁上骨折		治愈	张敬东	李玉安	方明桥	肱骨骨折闭合复位钢针内固定术
1888	D07儿童骨科、骨盆外科	2022-06-11	2022-06-22	3239065	陈金桃	女	61Y	肱骨上端骨折	二尖瓣返流	好转	孔建中	陈墨川	方文来	肱骨骨折切开复位螺钉内固定术
1889	D07儿童骨科、骨盆外科	2022-06-15	2022-06-22	3239085	田守功	男	38Y	小腿水平前部肌群肌腱损伤	足拇长伸肌腱断裂;肾结石;指骨骨折	好转	洪建军	余洋	郑亦静	皮肤和皮下坏死组织切除清创术;指骨骨折切开复位钢针内固定术;(足母)长伸肌腱缝合术
1890	D07儿童骨科、骨盆外科	2022-06-08	2022-06-22	3239289	金梅柳	女	86Y	股骨粗隆间骨折	后天性肾囊肿;下肢动脉粥样硬化;高血压病;脂肪肝;肺部感染;糖尿病	好转	孔建中	陈墨川	方文来	股骨骨折闭合复位髓内针内固定术
1891	D07儿童骨科、骨盆外科	2022-06-16	2022-06-23	3239432	曹炜	男	6Y	尺骨桡骨远端骨折		治愈	张敬东	闫广奎	方明桥	桡骨骨折闭合复位钢针内固定术
1892	D07儿童骨科、骨盆外科	2022-06-19	2022-06-23	3239606	杨生睿	男	4Y	肱骨外髁骨折		好转	张敬东	闫广奎	方明桥	肱骨骨折切开复位钢针内固定术
1893	D07儿童骨科、骨盆外科	2022-06-15	2022-06-23	3239618	黄铱晨	女	4Y	肱骨外髁骨折		治愈	张敬东	李玉安	王伟	肱骨骨折切开复位钢针内固定术
1894	D07儿童骨科、骨盆外科	2022-06-17	2022-06-23	3239632	陈诗涵	男	7Y	肱骨内髁骨折		好转	张敬东	李玉安	闫广奎	肱骨骨折切开复位空心钉内固定术
1895	D07儿童骨科、骨盆外科	2022-06-18	2022-06-23	3239643	戴宁震	男	7Y	肱骨髁上骨折		治愈	张敬东	李玉安	毛诚晃	肱骨骨折闭合复位钢针内固定术
1896	D07儿童骨科、骨盆外科	2022-06-23	2022-06-24	3239793	卢宇轩	男	5Y	肱骨外髁骨折		未愈	张敬东	李玉安	方明桥
1897	D07儿童骨科、骨盆外科	2022-06-19	2022-06-25	3239984	陈培硕	男	12Y	肱骨外科颈骨折		好转	张敬东	李玉安	李玉安	肱骨骨折闭合复位钢针内固定术
1898	D07儿童骨科、骨盆外科	2022-06-15	2022-06-25	3239987	杨菲菲	女	4Y	肱骨外髁骨折		好转	张敬东	李玉安	毛诚晃	肱骨骨折切开复位空心钉内固定术
1899	D07儿童骨科、骨盆外科	2022-06-13	2022-06-25	3239990	叶永富	男	70Y	股骨粗隆间骨折		治愈	杨雷	周一飞	张月雷	股骨骨折闭合复位髓内针内固定术
1900	D07儿童骨科、骨盆外科	2022-06-19	2022-06-25	3239992	刘睿桐	女	2Y	肱骨外髁骨折		好转	张敬东	闫广奎	毛诚晃	肱骨骨折切开复位空心钉内固定术
1901	D07儿童骨科、骨盆外科	2022-06-21	2022-06-25	3240010	马幽然	女	4Y	取除骨折内固定装置		其他	张敬东	李玉安	毛诚晃	股骨内固定物取出术
1902	D07儿童骨科、骨盆外科	2022-06-15	2022-06-25	3240016	李胜豪	男	9Y	股骨骨折		好转	张敬东	李玉安	毛诚晃	股骨骨折闭合复位钢针内固定术
1903	D07儿童骨科、骨盆外科	2022-06-20	2022-06-25	3240033	张铭伟	男	1Y	开放性拇指骨折	特指手指指神经损伤	好转	张敬东	李玉安	毛诚晃	指骨骨折切开复位钢针内固定术;指神经缝合术;指关节囊缝合术
1904	D07儿童骨科、骨盆外科	2022-05-24	2022-06-25	3240073	赵伟伟	男	35Y	股骨下端骨折	糖尿病;闭合性胫骨平台骨折;胆囊结石;高血压病;脂肪肝	好转	孔建中	陈墨川	方文来	经胫骨和腓骨的小腿离断术;肌腱、血管、神经探查术;皮肤和皮下坏死组织切除清创术;关节软骨修复术;创面负压封闭引流[VSD];残端修正术;股骨骨折切开复位髓内针内固定术
1905	D07儿童骨科、骨盆外科	2022-06-16	2022-06-26	3240422	张逸然	男	7Y	股骨颈骨折		好转	张敬东	闫广奎	方明桥	股骨骨折闭合复位钢针内固定术
1906	D07儿童骨科、骨盆外科	2022-06-24	2022-06-26	3240427	林尊	男	1Y	肱骨髁上骨折		好转	张敬东	李玉安	毛诚晃	肱骨骨折闭合复位髓内针内固定术
1907	D07儿童骨科、骨盆外科	2022-05-30	2022-06-26	3240435	易国德	男	52Y	闭合性胫骨平台骨折	小腿开放性损伤;脂肪肝;窦性心律失常;胫骨上端骨折	好转	孔建中	陈墨川	方文来	胫骨骨折切开复位螺钉内固定术;关节软骨修复术;皮肤和皮下坏死组织切除清创术
1908	D07儿童骨科、骨盆外科	2022-06-23	2022-06-26	3240538	陈子宸	男	6Y	肱骨髁上骨折		好转	张敬东	李玉安	方明桥	肱骨骨折闭合复位髓内针内固定术
1909	D07儿童骨科、骨盆外科	2022-06-20	2022-06-27	3240770	陈宏宇	男	8Y	蒙特贾骨折脱位	桡神经损害	治愈	张敬东	李玉安	方明桥	尺骨骨折切开复位髓内针内固定术
1910	D07儿童骨科、骨盆外科	2022-06-25	2022-06-27	3240837	陈妙涵	女	1Y	肱骨髁上骨折	尺骨桡骨闭合性骨折	治愈	张敬东	李玉安	方明桥	肱骨骨折闭合复位钢针内固定术
1911	D07儿童骨科、骨盆外科	2022-06-20	2022-06-27	3240838	王泽宇	男	4Y	取除骨折内固定装置		其他	张敬东	李玉安	方明桥	股骨内固定物取出术
1912	D07儿童骨科、骨盆外科	2022-06-15	2022-06-27	3241076	周川川	男	2Y	股骨骨折	头皮血肿	治愈	张敬东	李玉安	方明桥	股骨骨折切开复位髓内针内固定术
1913	D07儿童骨科、骨盆外科	2022-06-22	2022-06-28	3241314	洪锐萍	女	9Y	桡骨颈骨折		治愈	张敬东	李玉安	方明桥	桡骨骨折闭合复位钢针内固定术
1914	D07儿童骨科、骨盆外科	2022-06-22	2022-06-28	3241318	田钟源	男	5Y	蒙特贾骨折脱位	前臂桡神经损伤	治愈	张敬东	闫广奎	方明桥	尺骨骨折切开复位髓内针内固定术
1915	D07儿童骨科、骨盆外科	2022-06-23	2022-06-28	3241320	吴灿	男	1Y	特指趾骨骨折	足部皮肤撕裂伤	治愈	张敬东	李玉安	方明桥	肌腱、血管、神经探查术;皮肤和皮下坏死组织切除清创术;趾骨骨折切开复位钢针内固定术
1916	D07儿童骨科、骨盆外科	2022-06-19	2022-06-28	3241323	叶松蕊	女	62Y	胫骨骨折累及踝关节	胫腓韧带远端撕裂;下肢动脉粥样硬化;足挫伤;踝关节半脱位;足舟状骨骨折;外踝骨折	好转	孔建中	陈墨川	方文来	踝关节骨折切开复位钢针内固定术;副韧带修补术;踝关节修补术
1917	D07儿童骨科、骨盆外科	2022-06-22	2022-06-28	3241328	黄筱妮	女	10Y	锁骨骨折		好转	孔建中	陈墨川	方文来	锁骨骨折切开复位钢板内固定术;锁骨植骨术
1918	D07儿童骨科、骨盆外科	2022-05-15	2022-06-29	3241656	王梓慧	女	3Y	开放性特指趾骨骨折	创伤后趾骨坏死;福耳克曼氏缺血性挛缩;开放性足损伤	好转	张敬东	闫广奎	闫广奎	创面负压封闭引流[VSD];皮肤和皮下坏死组织切除清创术;皮肤缝合术;趾骨骨折闭合复位钢针内固定术;筋膜间隙切开减压术
1919	D07儿童骨科、骨盆外科	2022-06-26	2022-06-29	3241700	金子淇	女	7Y	取除骨折内固定装置		其他	张敬东	张敬东	李玉安	股骨内固定物取出术
1920	D07儿童骨科、骨盆外科	2022-06-23	2022-06-29	3241706	完芊浩	男	2Y	肱骨外髁骨折		好转	张敬东	李玉安	方明桥	肱骨骨折切开复位空心钉内固定术;关节软骨修复术
1921	D07儿童骨科、骨盆外科	2022-06-23	2022-06-29	3241708	乾约章	男	86Y	股骨粗隆间骨折	脂肪肝;肺结节;胫前动脉狭窄;高血压病;2型糖尿病;下肢动脉粥样硬化	好转	孔建中	陈墨川	方文来	股骨骨折闭合复位钢针内固定术
1922	D07儿童骨科、骨盆外科	2022-06-27	2022-06-29	3241709	张承轩	男	4Y	肱骨髁上骨折		治愈	张敬东	李玉安	王伟	肱骨骨折切开复位髓内针内固定术
1923	D07儿童骨科、骨盆外科	2022-06-25	2022-06-29	3241713	陈文博	男	6Y	取除骨折内固定装置		其他	张敬东	王伟	李玉安	胫骨内固定物取出术
1924	D07儿童骨科、骨盆外科	2022-06-25	2022-06-29	3241720	马家康	男	5Y	肱骨外髁骨折		好转	张敬东	李玉安	方明桥	肱骨骨折切开复位髓内针内固定术
1925	D07儿童骨科、骨盆外科	2022-06-28	2022-06-29	3241735	杨林宗	男	1Y	肱骨髁上骨折		治愈	张敬东	李玉安	王伟	肱骨骨折闭合复位髓内针内固定术
1926	D07儿童骨科、骨盆外科	2022-06-24	2022-06-29	3241739	卢玮衡	男	9Y	尺骨桡骨远端骨折		好转	张敬东	李玉安	李玉安	桡骨骨折闭合复位钢针内固定术
1927	D07儿童骨科、骨盆外科	2022-06-26	2022-06-29	3241775	陆晋成	男	6Y	尺骨桡骨闭合性骨折		治愈	孔建中	陈墨川	方文来	桡骨骨折闭合复位钢针内固定术
1928	D07儿童骨科、骨盆外科	2022-06-16	2022-06-30	3242111	何云林	男	29Y	桡骨下端骨折	开放性肘损伤;肱骨外髁骨折	好转	孔建中	陈墨川	方文来	桡骨骨折切开复位钢板内固定术;肱骨骨折切开复位钢针内固定术;皮肤和皮下坏死组织切除清创术
1929	D07儿童骨科、骨盆外科	2022-06-19	2022-06-30	3242121	刘笑笑	女	51Y	腓骨骨折	病毒性脑炎后遗症;下肢动脉粥样硬化;脂肪肝;左心衰竭;精神分裂症	好转	石成弟	石成弟	胡炜	腓骨植骨术;腓骨骨折切开复位螺钉内固定术
1930	D07儿童骨科、骨盆外科	2022-06-26	2022-06-30	3242226	林佳昊	男	5Y	胫骨下端骨折		好转	张敬东	李玉安	毛诚晃
1931	D07儿童骨科、骨盆外科	2022-06-28	2022-06-30	3242233	王杰	男	8Y	肱骨髁上骨折		治愈	张敬东	李玉安	毛诚晃	肱骨骨折闭合复位髓内针内固定术
1932	D07儿童骨科、骨盆外科	2022-06-30	2022-07-01	3242381	陈忠豪	男	14Y	取除骨折内固定装置	特指原因未进行操作	其他	张敬东	李玉安	方明桥
1933	D07儿童骨科、骨盆外科	2022-06-28	2022-07-01	3242458	周梓岩	男	1Y	肱骨髁上骨折		治愈	张敬东	李玉安	毛诚晃	肱骨骨折闭合复位钢针内固定术
1934	D07儿童骨科、骨盆外科	2022-06-26	2022-07-02	3242722	周厚国	男	47Y	取除骨折内固定装置	脂肪肝;肝囊肿;前列腺结石;肾积水伴肾输尿管结石;肾错构瘤	其他	黄俊武	王鉴顺	蔡乐益	髌骨内固定物取出术
1935	D07儿童骨科、骨盆外科	2022-06-25	2022-07-02	3242728	汤盛博	男	14Y	锁骨骨折	皮肤挫伤	好转	孔建中	陈墨川	方文来	锁骨骨折切开复位钢板内固定术
1936	D07儿童骨科、骨盆外科	2022-06-22	2022-07-02	3242732	陈美玲	女	23Y	胫腓骨干骨折	肾积水伴肾结石;踝骨闭合性骨折	治愈	孔建中	陈墨川	方文来	胫骨骨折切开复位钢板内固定术;胫骨人工骨植骨术
1937	D07儿童骨科、骨盆外科	2022-06-29	2022-07-02	3242736	叶子豪	男	8Y	取除骨折内固定装置		其他	张敬东	李玉安	毛诚晃	桡骨内固定物取出术
1938	D07儿童骨科、骨盆外科	2022-06-27	2022-07-02	3242741	陈雨生	男	4Y	开放性指骨骨折	开放性手指损伤不伴指甲损害;腕和手水平特指手指伸肌和肌腱损伤;特指手指指神经损伤	治愈	张敬东	李玉安	毛诚晃	指神经缝合术;指关节囊缝合术;伸指肌腱缝合术;指骨开放性骨折清创术;指骨骨折切开复位钢针内固定术;屈指肌腱缝合术
1939	D07儿童骨科、骨盆外科	2022-06-28	2022-07-02	3242743	王健	男	7Y	肱骨外髁骨折		治愈	张敬东	李玉安	毛诚晃	肱骨骨折切开复位钢针内固定术
1940	D07儿童骨科、骨盆外科	2022-06-22	2022-07-02	3242747	黄仁锥	男	40Y	锁骨骨折	后天性肾囊肿;前列腺增生;脂肪肝;前列腺结石;小腿特指部位挫伤	好转	孔建中	陈墨川	方文来	锁骨人工骨植骨术;锁骨骨折切开复位钢板内固定术
1941	D07儿童骨科、骨盆外科	2022-06-27	2022-07-02	3242761	苏兆隆	男	16Y	取除骨折内固定装置		其他	张敬东	李玉安	方明桥	尺骨内固定物取出术
1942	D07儿童骨科、骨盆外科	2022-06-29	2022-07-02	3242764	余思齐	男	5Y	取除骨折内固定装置		其他	张敬东	李玉安	方明桥	肱骨内固定物取出术
1943	D07儿童骨科、骨盆外科	2022-06-21	2022-07-03	3243291	沈贤富	男	59Y	股骨粗隆下骨折	泌尿道感染;后天性肾囊肿	好转	孔建中	陈墨川	方文来	股骨骨折闭合复位髓内针内固定术;股骨人工骨植骨术
1944	D07儿童骨科、骨盆外科	2022-06-27	2022-07-03	3243297	夏梓壕	男	7M	股骨干骨折		治愈	张敬东	李玉安	毛诚晃	股骨骨折闭合复位术;石膏绷带固定
1945	D07儿童骨科、骨盆外科	2022-06-29	2022-07-03	3243303	刘潇	男	6Y	取除骨折内固定装置		其他	张敬东	李玉安	毛诚晃	股骨内固定物取出术
1946	D07儿童骨科、骨盆外科	2022-06-27	2022-07-03	3243305	王雪华	女	41Y	髌骨骨折		好转	孔建中	陈墨川	方文来	髌骨骨折切开复位张力带钢丝内固定术
1947	D07儿童骨科、骨盆外科	2022-06-22	2022-07-03	3243311	陈菊眉	女	57Y	胫腓骨下端骨折	踝骨闭合性骨折;胆囊结石;下肢动脉粥样硬化	好转	孔建中	陈墨川	方文来	踝关节修补术;胫骨人工骨植骨术;踝关节骨折切开复位钢板内固定术;胫骨骨折切开复位钢板内固定术
1948	D07儿童骨科、骨盆外科	2022-06-13	2022-07-03	3243325	张莲弟	女	61Y	腓骨骨折	多发性肋骨骨折;开放性小腿多处损伤;脂肪肝;多发性肝囊肿	好转	孔建中	陈墨川	方文来	皮肤和皮下坏死组织切除清创术;创面负压封闭引流[VSD]
1949	D07儿童骨科、骨盆外科	2022-06-30	2022-07-03	3243328	徐志腾	男	2Y	拇指骨折	开放性手指损伤伴指甲损害	治愈	张敬东	王伟	王伟	皮肤缝合术;甲床清创术;拔甲术
1950	D07儿童骨科、骨盆外科	2022-06-30	2022-07-03	3243444	张宇	男	8Y	取除骨折内固定装置		其他	张敬东	易先宏	方明桥	股骨内固定物取出术
1951	D07儿童骨科、骨盆外科	2022-06-26	2022-07-03	3243463	王子桐	男	3Y	取除骨折内固定装置		其他	张敬东	李玉安	方明桥	胫骨内固定物取出术;股骨内固定物取出术
1952	D07儿童骨科、骨盆外科	2022-06-29	2022-07-04	3243309	郑敬烨	男	7Y	肱骨髁上骨折		治愈	张敬东	闫广奎	方明桥	肱骨骨折闭合复位钢针内固定术
1953	D07儿童骨科、骨盆外科	2022-06-28	2022-07-04	3243620	金荣骏	男	3Y	股骨干骨折		治愈	张敬东	李玉安	毛诚晃	股骨骨折闭合复位髓内针内固定术
1954	D07儿童骨科、骨盆外科	2022-06-25	2022-07-04	3243645	戚丽君	女	29Y	取除骨折内固定装置		其他	孔建中	陈墨川	方文来	骨盆内固定物取出术
1955	D07儿童骨科、骨盆外科	2022-06-25	2022-07-04	3243649	陈坤定	男	66Y	肩胛骨骨折	多发性肋骨骨折;肺大泡;后天性肾囊肿;肾结石;脂肪肝	好转	孔建中	陈墨川	方文来	肩胛骨骨折切开复位钢板内固定术
1956	D07儿童骨科、骨盆外科	2022-06-24	2022-07-04	3243687	徐建乐	男	47Y	胫骨骨折	下肢皮肤感染	好转	孔建中	陈墨川	方文来	胫骨骨折闭合复位髓内针内固定术
1957	D07儿童骨科、骨盆外科	2022-07-02	2022-07-04	3243711	林君韬	男	5Y	肱骨髁上骨折		治愈	张敬东	李玉安	毛诚晃	肱骨骨折闭合复位钢针内固定术;石膏绷带固定
1958	D07儿童骨科、骨盆外科	2022-06-25	2022-07-04	3243759	刘进笑	女	41Y	股骨干骨折	多发性肋骨骨折;腰椎骨折;脂肪肝;头部多处浅表损伤;腰椎间盘突出	好转	孔建中	陈墨川	方文来	股骨骨折闭合复位髓内针内固定术
1959	D07儿童骨科、骨盆外科	2022-06-24	2022-07-05	3244029	吴思军	男	44Y	髋臼骨折	肝功能异常;脂肪肝;股骨颈骨折;髋关节脱位	好转	孔建中	陈墨川	方文来	髋骨骨折切开复位钢板内固定术;关节软骨修复术;髋关节脱位切开复位内固定术
1960	D07儿童骨科、骨盆外科	2022-07-01	2022-07-05	3244074	董馨潞	女	2Y	尺骨干骨折	桡骨上端骨折	治愈	张敬东	李玉安	方明桥	桡骨骨折闭合复位髓内针内固定术;尺骨骨折闭合复位髓内针内固定术
1961	D07儿童骨科、骨盆外科	2022-07-02	2022-07-05	3244119	吴嘉凯	男	3Y	肱骨髁上骨折		治愈	张敬东	闫广奎	方明桥	肱骨骨折闭合复位钢针内固定术
1962	D07儿童骨科、骨盆外科	2022-06-27	2022-07-05	3244127	马海芳	女	38Y	锁骨骨折	后天性肾囊肿	治愈	翁益民	翁益民	项光恒	锁骨骨折切开复位钢板内固定术;锁骨人工骨植骨术
1963	D07儿童骨科、骨盆外科	2022-07-02	2022-07-05	3244281	李日林	男	67Y	取除骨折内固定装置	高血压病;后天性肾囊肿;胆囊结石	其他	孔建中	陈墨川	方文来	跖骨内固定物取出术
1964	D07儿童骨科、骨盆外科	2022-06-25	2022-07-06	3244140	李昕昕	女	2Y	股骨下端骨折	额骨骨折;多处挫伤;头皮血肿	治愈	张敬东	易先宏	毛诚晃	石膏绷带固定;股骨骨折闭合复位术
1965	D07儿童骨科、骨盆外科	2022-06-29	2022-07-06	3244542	吴嘉豪	男	9Y	胫骨骨折	肾挫伤	治愈	张敬东	易先宏	毛诚晃	胫骨骨折闭合复位髓内针内固定术
1966	D07儿童骨科、骨盆外科	2022-07-03	2022-07-06	3244549	陈雯雯	女	5Y	取除骨折内固定装置		其他	张敬东	李玉安	毛诚晃	股骨内固定物取出术
1967	D07儿童骨科、骨盆外科	2022-06-28	2022-07-06	3244550	柴森夏	男	1Y	胫骨下端骨折		好转	张敬东	李玉安	方明桥
1968	D07儿童骨科、骨盆外科	2022-06-29	2022-07-06	3244556	林元穗	男	10Y	肱骨下端骨折		治愈	张敬东	易先宏	方明桥	肱骨骨折闭合复位髓内针内固定术
1969	D07儿童骨科、骨盆外科	2022-07-03	2022-07-06	3244559	徐恩倍	男	3Y	取除骨折内固定装置		其他	张敬东	易先宏	方明桥	股骨内固定物取出术
1970	D07儿童骨科、骨盆外科	2022-07-03	2022-07-06	3244568	杨博文	男	9Y	取除骨折内固定装置		其他	张敬东	李玉安	毛诚晃	肱骨内固定物取出术
1971	D07儿童骨科、骨盆外科	2022-07-03	2022-07-06	3244570	冯熠	男	9Y	肱骨下端骨折	上臂神经损伤	治愈	张敬东	李玉安	毛诚晃	石膏绷带固定;肱骨骨折闭合复位钢针内固定术
1972	D07儿童骨科、骨盆外科	2022-07-03	2022-07-07	3244925	向家瑞	男	6Y	肱骨髁上骨折		治愈	张敬东	李玉安	方明桥	肱骨骨折闭合复位钢针内固定术
1973	D07儿童骨科、骨盆外科	2022-07-03	2022-07-07	3244935	陈意涵	女	3Y	肱骨下端骨折		治愈	张敬东	闫广奎	方明桥	肱骨骨折闭合复位钢针内固定术
1974	D07儿童骨科、骨盆外科	2022-07-05	2022-07-07	3245207	徐智博	男	5Y	肱骨髁上骨折		治愈	张敬东	李玉安	方明桥	肱骨骨折闭合复位钢针内固定术
1975	D07儿童骨科、骨盆外科	2022-07-05	2022-07-08	3245413	黄加武	男	12Y	取除骨折内固定装置		其他	张敬东	易先宏	方明桥	桡骨内固定物取出术;皮肤病损切除术
1976	D07儿童骨科、骨盆外科	2022-07-04	2022-07-08	3245422	蒋翼泽	男	13Y	取除骨折内固定装置	蚕豆病	其他	张敬东	李玉安	毛诚晃	尺骨内固定物取出术
1977	D07儿童骨科、骨盆外科	2022-07-05	2022-07-09	3245526	陈宋怡	女	12Y	取除骨折内固定装置		其他	张敬东	李玉安	毛诚晃	胫骨内固定物取出术
1978	D07儿童骨科、骨盆外科	2022-07-05	2022-07-09	3245612	翁洁	男	10Y	取除骨折内固定装置		其他	张敬东	闫广奎	方明桥	胫骨内固定物取出术
1979	D07儿童骨科、骨盆外科	2022-06-27	2022-07-09	3245626	方上蕉	男	70Y	开放性胫骨骨干骨折	开放性内踝骨折;前列腺结石;开放性踝损伤;跖骨骨折;高血压病;后天性肾囊肿;前列腺增生	好转	孔建中	陈墨川	方文来	创面负压封闭引流[VSD];胫骨骨折切开复位髓内针内固定术;踝关节骨折切开复位钢针内固定术;胫骨开放性骨折清创术
1980	D07儿童骨科、骨盆外科	2022-06-28	2022-07-09	3245642	尚松妹	女	59Y	肱骨上端骨折	慢性乙型病毒性肝炎;胆囊结石;肺结节;尺骨桡骨远端骨折;肋骨骨折;2型糖尿病	好转	孔建中	陈墨川	方文来	肱骨骨折切开复位螺钉内固定术;肩袖修补术;桡骨骨折切开复位钢板内固定术;关节软骨修复术
1981	D07儿童骨科、骨盆外科	2022-07-04	2022-07-09	3245645	徐德怀	男	8Y	取除骨折内固定装置		其他	张敬东	易先宏	毛诚晃	胫骨内固定物取出术
1982	D07儿童骨科、骨盆外科	2022-07-05	2022-07-09	3245648	戴邵凯	男	7Y	尺骨桡骨远端骨折		治愈	张敬东	李玉安	方明桥	桡骨骨折切开复位钢针内固定术
1983	D07儿童骨科、骨盆外科	2022-06-30	2022-07-09	3245654	苏光旺	男	35Y	跟骨骨折		治愈	翁益民	翁益民	项光恒	跟骨人工骨植骨术;跟骨骨折切开复位钢板内固定术
1984	D07儿童骨科、骨盆外科	2022-07-04	2022-07-09	3245656	邓瑞璟	男	4Y	肱骨外髁骨折	桡骨头脱位	治愈	张敬东	易先宏	毛诚晃	关节软骨修复术;肱骨骨折切开复位钢针内固定术
1985	D07儿童骨科、骨盆外科	2022-07-05	2022-07-09	3245658	伍寿凯	男	11Y	取除骨折内固定装置		其他	张敬东	李玉安	方明桥	桡骨内固定物取出术
1986	D07儿童骨科、骨盆外科	2022-06-07	2022-07-09	3245674	王永祥	男	13Y	经大转子骨折	内踝骨折;腓骨骨折	治愈	张敬东	李玉安	毛诚晃	关节软骨修复术;踝关节骨折切开复位钢针内固定术;腓骨骨折切开复位钢板内固定术;股骨骨折闭合复位髓内针内固定术
1987	D07儿童骨科、骨盆外科	2022-07-02	2022-07-09	3245693	谢王玲	女	54Y	跖骨骨折	下肢静脉血栓形成;多发性肋骨骨折	好转	孔建中	陈墨川	方文来	跖骨骨折切开复位钢板内固定术
1988	D07儿童骨科、骨盆外科	2022-06-30	2022-07-09	3245708	王子旭	男	2Y	股骨干骨折	耳浅表损伤	治愈	张敬东	易先宏	毛诚晃	股骨骨折闭合复位髓内针内固定术
1989	D07儿童骨科、骨盆外科	2022-06-29	2022-07-09	3245745	刘玉明	男	66Y	锁骨骨折	多发性肋骨骨折;肩胛骨骨折	好转	孔建中	陈墨川	方文来	锁骨骨折切开复位钢板内固定术
1990	D07儿童骨科、骨盆外科	2022-07-02	2022-07-09	3245847	龚宝蕊	女	84Y	股骨颈骨折	胆囊结石;造血功能停滞	未愈	孔建中	陈墨川	方文来
1991	D07儿童骨科、骨盆外科	2022-06-28	2022-07-09	3245973	章阿花	女	81Y	股骨粗隆间骨折	2型糖尿病;Ⅲ期褥疮;房性早搏;下肢动脉粥样硬化;后天性肾囊肿	好转	孔建中	陈墨川	方文来	股骨骨折闭合复位髓内针内固定术
1992	D07儿童骨科、骨盆外科	2022-07-08	2022-07-10	3246214	王昊俊	男	2Y	尺骨桡骨远端骨折		治愈	张敬东	易先宏	方明桥	桡骨骨折闭合复位术;石膏绷带固定
1993	D07儿童骨科、骨盆外科	2022-07-02	2022-07-10	3246243	杨朔	男	5Y	股骨干骨折		治愈	张敬东	易先宏	方明桥	股骨骨折闭合复位髓内针内固定术
1994	D07儿童骨科、骨盆外科	2022-07-05	2022-07-10	3246254	蔡静瑶	女	9Y	胫骨下端骨折		治愈	张敬东	李玉安	毛诚晃	胫骨骨折切开复位钢针内固定术
1995	D07儿童骨科、骨盆外科	2022-07-05	2022-07-10	3246258	胡锦逸	男	2Y	开放性指骨骨折	开放性手指损伤伴指甲损害	治愈	张敬东	李玉安	毛诚晃	甲成形术;指骨骨折切开复位钢针内固定术
1996	D07儿童骨科、骨盆外科	2022-07-06	2022-07-10	3246260	蔡清秀	女	11Y	小腿水平前部肌群肌肉损伤	胫骨骨干骨折;小腿开放性损伤;膝挫伤	治愈	张敬东	李玉安	毛诚晃	石膏绷带固定;皮肤和皮下组织非切除性清创;中厚皮片移植术;下肢肌腱缝合术
1997	D07儿童骨科、骨盆外科	2022-07-06	2022-07-10	3246262	麻金龙	男	5Y	肱骨髁上骨折		治愈	张敬东	李玉安	毛诚晃	肱骨骨折闭合复位钢针内固定术
1998	D07儿童骨科、骨盆外科	2022-07-06	2022-07-10	3246298	翁卿许	男	8Y	取除骨折内固定装置		其他	张敬东	易先宏	毛诚晃	胫骨内固定物取出术
[truncated: 12,287 more rows]
