# Supplementary material for: Variable Rate of D-dimer Predicts Venous Thromboembolism in Postoperative Fracture Patients: A Single-Center Retrospective Cohort Study
Source: Research Square preprint supplement (doi:10.21203/rs.3.rs-7878480/v1), 2025-12-09
Supplement: Supplementary file 8 [file c193bae0935f04318117b839.xlsx]

## Sheet: Sheet1
序号	出院科室	入院日期	出院日期	病案号	病人	性别	年龄	主诊断	非主诊断	转归	主任	主治	住院	手术
					姓名					情况	医师	医师	医师	名称
1	A03儿童康复	2023-12-30	2024-01-13	3471102	陈伊宁	女	4Y	脊髓损伤	第二颈椎骨折;颈椎脱位;手术后状态，其他特指的;急性上呼吸道感染;涉及使用其他康复操作的医疗	好转	陈翔	涂丰霞	伍玉丹	运动训练;作业疗法;生物反馈治疗;高压给氧;针灸;蜡疗
2	A03儿童康复	2024-01-09	2024-01-22	3476186	杨泽琳	男	5Y	运动障碍	脑挫伤;手术后恢复期;创伤性小脑挫伤;创伤后脑积水;创伤性脑积水;颅骨骨折;后天性颅骨缺损;急性上呼吸道感染	好转	汤行录	刘婵	庞琼怡	运动训练;作业疗法;生物反馈治疗;蜡疗;高压给氧;语言治疗
3	A03儿童康复	2024-01-08	2024-02-03	3478522	章皓彬	男	2Y	运动障碍	进食障碍;面神经损伤;头部的损伤;脑挫伤;颅骨骨折;颅腔积气;创伤性脑出血;创伤性蛛网膜下腔出血;皮下血肿;肺挫伤;肺部感染	好转	陈翔	陈珊	庞琼怡	电针脉冲疗法;生物反馈治疗;运动训练;作业疗法
4	A03儿童康复	2024-02-24	2024-03-20	3485315	杨泽琳	男	5Y	运动障碍	言语障碍;进食障碍;脑挫伤;手术后恢复期;创伤性小脑挫伤;创伤后脑积水;骨折治疗后恢复期;后天性颅骨缺损;泌尿道感染;涉及使用康复操作的医疗	好转	陈翔	刘婵	伍玉丹	运动训练;作业疗法;语言治疗;生物反馈治疗;电针治疗;高压给氧
5	A03儿童康复	2024-04-08	2024-04-21	3494663	陈伊宁	女	4Y	运动障碍	脊髓损伤;骨折术后;颈椎术后;涉及使用其他康复操作的医疗	好转	陈翔	刘婵	伍玉丹	运动训练;作业疗法;生物反馈治疗;针灸;蜡疗;高压给氧
6	A03儿童康复	2024-05-08	2024-05-20	3502999	郑玉景	男	4Y	关节僵硬	腕和手的损伤;取除骨折内固定装置;腕和手多处神经损伤;涉及使用康复操作的医疗	治愈	汤行录	涂丰霞	伍玉丹	生物反馈治疗;作业疗法;蜡疗;伤口高压氧治疗;针灸
7	A03儿童康复	2024-04-15	2024-06-08	3508852	张文科	男	11Y	偏瘫	贝尔面瘫;硬膜下血肿;头皮血肿;脑疝;颅骨骨折;创伤性蛛网膜下腔出血;颅腔积气;多处挫伤;肾结石;急性上呼吸道感染;涉及使用康复操作的医疗	好转	陈翔	陈珊	黄婷婷2	脑内血肿清除术;运动训练;作业疗法;电针治疗;生物反馈治疗;高压给氧;颞肌下减压术
8	A03儿童康复	2024-05-11	2024-06-08	3508858	章涵雅	女	3Y	运动障碍	言语障碍;弥漫性轴索损伤;创伤性颅内出血;额骨骨折;肱骨外科颈骨折;肩胛骨骨折;心肌损害;肝挫伤;急性上呼吸道感染;涉及使用康复操作的医疗	好转	汤行录	刘婵	赵凯怡	运动训练;语言治疗;作业疗法;生物反馈治疗;针灸;高压给氧
9	A03儿童康复	2024-05-06	2024-06-19	3512722	秦佳乐	男	3Y	弥漫性轴索损伤	脑挫伤;硬膜外血肿;脑室出血;颅腔积气;颅骨骨折;眼挫伤;肺挫伤;气胸;腹腔积液;腹部挫伤;心脏挫伤;尺骨上端骨折;休克;急性上呼吸道感染;寰枢椎半脱位;胆囊结石;运动障碍;言语障碍;贝尔面瘫	好转	陈翔	涂丰霞	伍玉丹	运动训练;作业疗法;语言治疗;生物反馈治疗;高压给氧
10	A03儿童康复	2024-05-10	2024-06-24	3514339	陈浩	男	4Y	脑疝	硬膜外血肿;脑挫伤;颅骨骨折;蛛网膜下出血;头皮血肿;颅腔积气;寰枢椎半脱位;偏瘫;周围性面神经麻痹;急性上呼吸道感染;头皮脓肿	好转	汤行录	涂丰霞	伍玉丹	颅内血肿清除术;运动训练;作业疗法;语言治疗;生物反馈治疗;电针治疗;高压给氧;脑循环功能治疗[CVFT];重复经颅磁刺激[rTMS]
11	A03儿童康复	2024-05-30	2024-06-26	3514887	连思诚	男	3Y	运动障碍	言语障碍;贝尔面瘫;弥漫性轴索损伤;闭合性颅脑损伤中型;局灶性大脑挫伤伴出血;硬脑膜下积液;创伤性蛛网膜下腔出血;皮肤挫伤;眼眶挫伤;眶骨骨折;面部软组织挫伤;肝挫伤;急性上呼吸道感染	好转	汤行录	涂丰霞	伍玉丹	运动训练;作业疗法;语言治疗;脑循环功能治疗[CVFT];重复经颅磁刺激[rTMS];电针治疗;针灸;高压给氧;蜡疗;生物反馈治疗
12	A03儿童康复	2024-05-24	2024-07-08	3518789	钱泊森	男	3Y	创伤性蛛网膜下出血	脑挫伤;颅骨骨折;头皮血肿;肺挫伤;多处挫伤;脊柱侧弯;偏瘫;贝尔面瘫;运动性失语	好转	陈翔	涂丰霞	黄婷婷2	脑内血肿清除术;颅骨去骨瓣减压术;运动训练;语言治疗;生物反馈治疗;高压给氧;针灸;作业疗法;电针治疗
13	A03儿童康复	2024-06-24	2024-07-10	3519677	陈乐一	男	8M	特定性运动功能发育障碍	内斜视;听觉异常，其他特指的;染色体异常;皮肤血管瘤;急性上呼吸道感染;病毒性皮疹;胫骨骨折;涉及使用康复操作的医疗	好转	陈翔	涂丰霞	黄婷婷2	运动训练;作业疗法;日常生活动作训练;脑循环功能治疗[CVFT];重复经颅磁刺激[rTMS];电针经络氧疗法;生物反馈治疗;水疗;高压给氧;蜡疗
14	A03儿童康复	2024-05-29	2024-07-12	3520349	林宸宇	男	2Y	下颌骨骨折	颅骨骨折;创伤性颅内出血;脑挫伤;弥漫性轴索损伤;肺挫伤;多处挫伤;心肌损害;急性失血性贫血;肱骨髁上骨折;视神经损伤;运动障碍;言语障碍;视觉障碍;贝尔面瘫;涉及使用康复操作的医疗	好转	汤行录	陈珊	赵凯怡	下颌骨骨折切开复位内固定术;运动训练;语言治疗;脑循环功能治疗[CVFT];重复经颅磁刺激[rTMS];生物反馈治疗;高压给氧;针灸;作业疗法;电针治疗
15	A03儿童康复	2024-05-23	2024-07-15	3521407	田兴阳	男	4Y	创伤性蛛网膜下腔出血	脑挫伤;弥漫性轴索损伤;额骨骨折;肺挫伤;肝挫伤;脾损伤;心肌损害;轻度贫血;脑发育不全;尺骨鹰嘴骨折;意识丧失;运动障碍;吞咽困难;涉及使用康复操作的医疗	好转	汤行录	陈珊	赵凯怡	运动训练;生物反馈治疗;重复经颅磁刺激[rTMS];高压给氧;针灸
16	A03儿童康复	2024-06-22	2024-07-20	3523177	邵悦	女	8Y	运动障碍	贝尔面瘫;运动性失语;脑挫伤;硬膜下血肿;创伤性蛛网膜下腔出血;颅骨骨折;眶骨骨折;肺挫伤;心脏挫伤;涉及使用康复操作的医疗	好转	陈翔	刘婵	黄婷婷2	运动训练;语言治疗;生物反馈治疗;作业疗法;脑循环功能治疗[CVFT];重复经颅磁刺激[rTMS];高压给氧;针灸
17	A03儿童康复	2024-06-22	2024-07-22	3524004	陈伊宁	女	4Y	运动障碍	颈部脊髓损伤;枢椎齿状突骨折;寰枢椎脱位;颈椎术后;轻度营养不良;急性上呼吸道感染;涉及使用康复操作的医疗	好转	陈翔	涂丰霞	黄婷婷2	运动训练;作业疗法;生物反馈治疗;针灸;蜡疗;小儿捏脊治疗
18	A03儿童康复	2024-07-06	2024-07-22	3524005	秦佳乐	男	4Y	运动障碍	言语障碍;贝尔面瘫;弥漫性轴索损伤;脑挫伤;硬膜外血肿;颅骨骨折;眼上直肌麻痹;尺骨上端骨折;胆囊结石;急性上呼吸道感染;胃肠功能紊乱;涉及使用康复操作的医疗	好转	陈翔	涂丰霞	黄婷婷2	运动训练;语言治疗;作业疗法;生物反馈治疗;高压给氧;针灸;脑循环功能治疗[CVFT];重复经颅磁刺激[rTMS];小儿捏脊
19	A03儿童康复	2024-05-18	2024-08-05	3529220	祁琪	女	12Y	肺挫伤	创伤性血气胸;气胸;纵隔气肿;创伤性皮下气肿;休克;急性失血性贫血;呼吸衰竭;急性呼吸窘迫综合征;肋骨骨折;锁骨骨折;多处挫伤;胰腺损伤;股骨多处骨折;股骨髁骨折;导管相关性尿路感染;败血症;喉返神经麻痹;膈神经损伤;构音障碍;焦虑状态;急性支气管炎	治愈	陈翔	涂丰霞	黄婷婷2	运动训练;呼吸训练;语言治疗;股骨骨折切开复位钢板内固定术;纵隔切开术;胸腔闭式引流术;超声疗法
20	A03儿童康复	2024-08-07	2024-08-22	3536245	邵悦	女	9Y	运动障碍	运动性失语;贝尔面瘫;脑挫伤;颅骨骨折;眶骨骨折;涉及使用康复操作的医疗	好转	陈翔	涂丰霞	黄婷婷2	运动训练;语言治疗;作业疗法;生物反馈治疗;脑循环功能治疗[CVFT];重复经颅磁刺激[rTMS];高压给氧;蜡疗;温针灸治疗
21	A03儿童康复	2024-08-07	2024-08-24	3536738	林宸宇	男	3Y	运动障碍	言语障碍;贝尔面瘫;脑挫伤;视神经损伤;视觉障碍;颅骨多发性骨折;下颌骨骨折;肱骨髁上骨折;涉及使用康复操作的医疗	好转	陈翔	刘婵	伍玉丹	运动训练;语言治疗;作业疗法;电针治疗;生物反馈治疗;脑循环功能治疗[CVFT];温针灸治疗;重复经颅磁刺激[rTMS];高压给氧
22	A03儿童康复	2024-08-13	2024-08-28	3538341	卢孙秉政	男	4Y	运动障碍	言语障碍;脑外伤后综合征;股骨干骨折;窦性心律失常;肾结石;扁桃体肥大伴有腺样体肥大;急性上呼吸道感染;涉及使用康复操作的医疗	好转	陈翔	刘婵	伍玉丹	运动训练;语言治疗;作业疗法;生物反馈治疗;脑循环功能治疗[CVFT];重复经颅磁刺激[rTMS];蜡疗;温针灸治疗
23	A03儿童康复	2024-08-31	2024-09-11	3543391	陈浩	男	4Y	偏瘫	贝尔面瘫;硬膜外血肿;脑挫伤;顶骨骨折;颞骨骨折;涉及使用康复操作的医疗	好转	陈翔	涂丰霞	黄婷婷2	运动训练;作业疗法;生物反馈治疗;脑循环功能治疗[CVFT];高压给氧;温针灸治疗;重复经颅磁刺激[rTMS];面肌悬吊术;蜡疗;电针经络氧疗法
24	A03儿童康复	2024-09-04	2024-09-15	3545003	陈伊宁	女	5Y	运动障碍	颈部脊髓损伤;枢椎齿状突骨折;寰枢椎脱位;颈椎术后;轻度营养不良;急性上呼吸道感染;涉及使用康复操作的医疗	好转	汤行录	陈珊	赵凯怡	运动训练;作业疗法;生物反馈治疗;温针灸治疗;蜡疗;小儿捏脊
25	A03儿童康复	2024-09-11	2024-09-30	3550889	林宸宇	男	3Y	运动障碍	言语障碍;贝尔面瘫;脑挫伤;视神经损伤;视觉障碍;颅骨多发性骨折;下颌骨骨折;急性上呼吸道感染	好转	陈翔	刘婵	伍玉丹	运动训练;语言治疗;作业疗法;脑循环功能治疗[CVFT];高压给氧;生物反馈治疗;面肌悬吊术;电针经络氧疗法;重复经颅磁刺激[rTMS];温针灸治疗
26	A03儿童康复	2024-10-26	2024-11-10	3566090	卢孙秉政	男	4Y	运动障碍	言语障碍;脑外伤后综合征;窦性心律失常;肾结石;骨折治疗后恢复期;急性上呼吸道感染;涉及使用康复操作的医疗	好转	汤行录	陈珊	赵凯怡	运动训练;语言治疗;生物反馈治疗;脑循环功能治疗[CVFT];重复经颅磁刺激[rTMS];作业疗法
27	A03儿童康复	2024-10-23	2024-11-10	3566099	陈伊宁	女	5Y	运动障碍	颈部脊髓损伤;骨折治疗后恢复期;寰枢椎脱位;轻度营养不良;急性上呼吸道感染;涉及使用康复操作的医疗	好转	陈翔	刘婵	伍玉丹	运动训练;温针灸治疗;蜡疗;生物反馈治疗;作业疗法;小儿捏脊
28	A03儿童康复	2024-10-31	2024-11-17	3568998	田兴阳	男	5Y	特定性运动功能发育障碍	言语和语言发育障碍;弥漫性轴索损伤;运动障碍;尺骨鹰嘴骨折;涉及使用康复操作的医疗	好转	陈翔	刘婵	伍玉丹	运动训练;语言治疗;生物反馈治疗;脑循环功能治疗[CVFT];蜡疗;作业疗法;电针治疗;重复经颅磁刺激[rTMS]
29	A03儿童康复	2024-10-21	2024-11-19	3569772	李凯泽	男	5Y	偏瘫	周围性面神经麻痹;第六［展］神经麻痹;臂丛神经损伤;锁骨骨折;颅骨骨折;下颌骨骨折;硬膜下血肿;头皮血肿;后天性眼睑畸形;内眦成形术后恢复期;暴露性角膜炎;多处挫伤;上颌窦囊肿;涉及使用康复操作的医疗	好转	陈翔	刘婵	伍玉丹	运动训练;语言治疗;生物反馈治疗;温针灸治疗;作业疗法;高压给氧;脑循环功能治疗[CVFT];重复经颅磁刺激[rTMS];电针治疗
30	A03儿童康复	2024-11-09	2024-11-27	3573390	祁琪	女	12Y	膝关节僵硬	支气管狭窄;先天性气管发育异常;重症肺炎;肋骨骨折;陈旧性锁骨骨折;手术后恢复期;股骨髁上骨折;喉返神经疾患;膈神经损伤;环性心境人格;耐甲氧西林金黄色葡萄球菌感染;涉及使用康复操作的医疗	好转	陈翔	涂丰霞	黄婷婷2	运动训练;生物反馈治疗;蜡疗;超声波联合治疗;呼吸训练;纤维支气管镜检查伴肺泡灌洗术
31	A03儿童康复	2024-11-14	2024-12-04	3575972	张熙媛	女	4Y	创伤性硬膜下出血	弥漫性轴索损伤;蛛网膜下出血;硬脑膜下积液;头皮血肿;颅骨骨折;眶骨骨折;视神经损伤;肌肉损伤;心肌损害;骨盆骨折;寰枢椎半脱位;多处挫伤;运动障碍;视觉障碍;胆囊结石;涉及使用康复操作的医疗	好转	陈翔	涂丰霞	黄婷婷2	经外周静脉穿刺中心静脉置管术;运动训练;作业疗法;语言治疗;电针治疗;生物反馈治疗;高压给氧;重复经颅磁刺激[rTMS];留置导尿管的置入术
32	A03儿童康复	2024-12-10	2024-12-23	3583342	张熙媛	女	4Y	运动障碍	视觉障碍;多处开放性伤口;脑挫伤;弥漫性轴索损伤;硬膜下血肿;蛛网膜下出血;硬脑膜下积液;头皮血肿;颅骨骨折;眶尖综合征;屈光不正;眶骨骨折;视神经损伤;肌肉损伤;骨盆骨折;胆囊结石;肾积水伴输尿管结石;涉及使用康复操作的医疗	好转	陈翔	刘婵	伍玉丹	运动训练;语言治疗;重复经颅磁刺激[rTMS];针灸;作业疗法;电针治疗;生物反馈治疗
33	A03儿童康复	2024-12-11	2024-12-29	3585772	李凯泽	男	5Y	偏瘫	周围性面神经麻痹;第六［展］神经麻痹;臂丛神经损伤;锁骨骨折;颅骨骨折;下颌骨骨折;硬膜下血肿;头皮血肿;后天性眼睑畸形;内眦成形术后恢复期;暴露性角膜炎;上颌窦囊肿;涉及使用康复操作的医疗	好转	陈翔	刘婵	伍玉丹	运动训练;作业疗法;物理疗法;针灸;重复经颅磁刺激[rTMS];蜡疗
34	A04儿童ICU	2024-01-18	2024-01-19	3474323	马怡然	女	2Y	化脓性脑膜炎	脑疝;脓毒性休克;多脏器功能衰竭;颅底骨折;眶骨骨折;视神经损伤	死亡	潘国权	娄鹏程	林蓓蓓2	呼吸机治疗[小于96小时];静脉穿刺术
35	A04儿童ICU	2024-03-24	2024-03-24	3486419	殷钰轩	男	3Y	创伤性脑疝	创伤性硬膜下出血;枕骨骨折;颅腔积气;创伤性蛛网膜下腔出血;头皮血肿;脑脊液鼻漏;脑脊液耳漏;呼吸衰竭;失血性休克;急性失血性贫血;呼吸心跳骤停	死亡	潘国权	卢露	卢露	心肺复苏
36	A04儿童ICU	2024-05-25	2024-05-25	3504867	黄帅	男	3Y	创伤性脑疝	呼吸心跳骤停;脑挫伤;创伤性蛛网膜下腔出血;脾损伤;腹腔积液;创伤性凝血病;肺挫伤;创伤性胸腔积液;创伤性气胸;枕骨骨折;额骨骨折;颞骨骨折;慢性失血性贫血;头皮血肿;肱骨骨折;髂骨骨折;失血性休克	死亡	王林霞	金江兵	唐震海	呼吸机治疗[小于96小时]
37	A04儿童ICU	2024-06-13	2024-06-14	3511137	刘若稀	女	3Y	创伤性脑疝	脑挫伤;额骨骨折;顶骨骨折;创伤性蛛网膜下腔出血;创伤性硬膜下出血;颅腔积气;寰枢椎半脱位;肺挫伤;多处挫伤;失血性休克;创伤性凝血病;肝挫伤;颞骨骨折	未愈	南向珍	卢露	唐震海	呼吸机治疗[小于96小时]
38	A04儿童ICU	2024-10-09	2024-10-18	3556957	邵一然	女	5Y	弥漫性轴索损伤	视神经损伤;眶骨骨折;多脏器功能衰竭;多处挫伤;急性失血性贫血	未愈	南向珍	薛超超	唐震海	呼吸机治疗[小于96小时];持续性动脉内血气监测;股静脉穿刺置管术
39	A04儿童ICU	2024-12-02	2024-12-04	3575935	王谦诺	男	6Y	脑挫伤	颅骨多发性骨折;创伤性脑梗塞;头皮血肿;颅腔积气;肺挫伤;肱骨骨折;失血性休克;急性失血性贫血;多处挫伤;肝挫伤;心脏挫伤	未愈	潘国权	叶小姣	卢露	少于96小时连续的持续性侵入性机械性通气;24小时血压监测;股静脉穿刺置管术;气管内插管
40	A05儿科内分泌	2024-04-13	2024-04-15	3492823	吴家乐	男	14Y	成骨不全	骨折术后;尺骨鹰嘴骨折;桡骨远端骨折;尺骨鹰嘴骨折;胫骨结节骨折	好转	卢一丽	曹顺顺	郭书真
41	A05儿科内分泌	2024-04-14	2024-04-16	3493155	郑朝泽	男	1Y	成骨不全	骨折术后恢复期	未愈	卢一丽	曹顺顺	郭书真
42	A05儿科内分泌	2024-04-20	2024-04-22	3495065	苏义豪	男	9Y	成骨不全	骨折术后恢复期;肱骨外髁骨折;后天性肘内翻	好转	卢一丽	金佳蕙	姜晗丹
43	A05儿科内分泌	2024-04-29	2024-05-10	3500123	金欣杭	女	10Y	骨质疏松伴有病理性骨折	脊柱侧弯;髓质海绵肾;高钙尿症;肝囊肿;后天性肾囊肿;维生素D缺乏病	好转	郑雯洁	叶晓华	上官瑶瑶	骨髓穿刺术
44	A05儿科内分泌	2024-07-10	2024-07-16	3522080	蒋诚君	男	14Y	幼年型特发性关节炎	骨质疏松;胫骨骨折;胫骨结节幼年型骨软骨病;频发性室性期前收缩	好转	郑雯洁	郑雯洁	杨康康	骨髓穿刺术
45	A05儿科内分泌	2024-07-15	2024-07-21	3523839	姚经匡	男	12Y	成骨不全	骨折术后	好转	卢一丽	曹顺顺	丁诚
46	A05儿科内分泌	2024-11-03	2024-11-07	3565197	张梓渊	男	3Y	肺炎支原体性肺炎	锁骨骨折;肾盂积水，其他的;肾结石	治愈	卢一丽	金佳蕙	郑智超
47	A05儿科内分泌	2024-12-16	2024-12-24	3583831	姚经匡	男	12Y	创伤性关节病	成骨不全;多处挫伤;骨折术后;骨质疏松	好转	郑雯洁	叶晓华	黄继谦
48	A06(儿神)	2024-02-01	2024-02-18	3480089	黄昌泽	男	1M	慢性腹泻	抗生素相关性肠炎;大肠杆菌性肠炎;低蛋白血症;代谢性酸中毒;锁骨骨折;牛奶过敏反应	治愈	陈桧平	林小春	林小春	静脉其他穿刺
49	A06(儿神)	2024-05-25	2024-05-29	3505926	林垭哲	男	2Y	腓骨骨折	下肢骨肿瘤	好转	林忠东	张崇晓	王晓雨
50	A06(儿神)	2024-06-08	2024-06-20	3513098	颜孙锐	男	7Y	周围性面神经麻痹	颞骨骨折;脑挫伤;颅腔积气	好转	叶秀云	施旭来	王晓雨	腰椎穿刺术
51	A06(儿神)	2024-08-07	2024-08-15	3533341	谢行远	男	4Y	癫痫	常染色体的缺失;股骨骨折;骨质疏松;听觉异常，其他特指的;急性上呼吸道感染	好转	施旭来	李秀翠	李秀翠
52	A06(儿神)	2024-09-14	2024-09-15	3545161	林钰芯	女	10M	硬膜下血肿	顶骨骨折;头皮血肿;颅内感染;急性上呼吸道感染	好转	胡颖	郑飞霞	王博浩
53	A06(儿神)	2024-09-09	2024-09-30	3550833	戴通	男	13Y	细菌性脑膜炎	脑脊液鼻漏;颅骨骨折;鼻骨骨折;过敏性皮炎;肝损害;颅内积气[气颅症]	治愈	林忠东	赵钱雷	张崇晓	鼻骨折闭合性复位术;腰椎穿刺术;腰椎穿刺术
54	A06(儿神)	2024-09-26	2024-10-08	3553246	周奕欢	女	5Y	创伤性硬膜下出血	顶骨骨折;颅腔积气;头皮血肿;脓毒血症;颞骨骨折	治愈	林忠东	赵钱雷	张崇晓	腰椎穿刺术
55	A06(儿神)	2024-09-23	2024-10-21	3558331	李凯泽	男	5Y	下颌骨骨折	颅底骨折;创伤性颅内出血;后天性眼睑畸形;睑裂闭合不全;脑脊液耳漏;脑脊液鼻漏;颞骨骨折;肌腱和肌肉损伤;头皮血肿;肺挫伤;眶骨骨折;脑挫伤;眼撕裂伤;暴露性角膜炎;休克;创伤性凝血病;急性失血性贫血;肝挫伤;锁骨骨折;周围性面神经麻痹;偏瘫;臂丛神经损伤;皮肤真菌感染	治愈	胡颖	郑飞霞	王晓雨	下颌骨骨折切开复位内固定术;眶骨骨折切开复位内固定术;股静脉穿刺术;股静脉穿刺术;内眦成形术
56	A07(儿消)	2024-02-24	2024-02-29	3481253	马淳萱	男	1Y	食管狭窄	手术后状态，其他特指的;肺炎;肋骨多处骨折	治愈	陈桧平	林小春	林小春	内镜下食管扩张术
57	A07(儿消)	2024-04-19	2024-05-14	3501252	郑青鸿	男	7Y	急性创伤性胰腺炎，轻症	多处开放性伤口;颞骨骨折;顶骨骨折;额骨骨折;鼻骨骨折;眶骨骨折;头部肌肉损伤;头皮血肿;尺骨桡骨闭合性骨折;股骨骨折;多处浅表损伤;肝挫伤;胰腺损伤;心脏其他损伤;胆囊结石	好转	潘彤彤	潘彤彤	郑淑姿	股骨骨折闭合复位髓内针内固定术;尺骨骨折闭合性复位术;桡骨骨折闭合性复位术;石膏绷带固定
58	A07(儿消)	2024-08-07	2024-08-22	3536120	李梓轩	女	2M	营养不良	小样儿;陈旧性锁骨骨折;缺氧缺血性脑病	好转	潘彤彤	林小春	叶游游
59	A07(儿消)	2024-10-09	2024-10-20	3557747	侯越佳	女	13Y	颌下感染	脓毒血症;慢性腹泻;脱水;嗜酸粒细胞性胃肠炎;重度营养不良伴消瘦;甲状腺功能检查的异常结果;白癜风;陈旧性肱骨骨折;陈旧性肋骨骨折	治愈	潘彤彤	林小春	林小春	颌间隙引流术
60	A08(儿心血)	2024-03-05	2024-03-08	3482529	项郁煊	男	10Y	成骨不全	骨折术后;骨折术后恢复期	好转	卢一丽	罗越	姜晗丹
61	A09(儿肾)	2024-10-23	2024-10-27	3560509	庄永沛	男	14Y	内分泌病性骨质疏松	腰椎骨折L1;IgA肾病;肝损害	好转	杨青	余灵芳	余灵芳
62	A09(儿肾)	2024-11-09	2024-11-16	3568777	吴睿涵	女	6Y	IgA肾病	高尿酸血症;注意缺陷与多动障碍;急性上呼吸道感染;桡骨远端骨折	好转	杨青	余灵芳	余灵芳	肾穿刺活组织检查
63	A10(儿血)	2024-09-16	2024-09-25	3548723	金航萱	男	6M	创伤性硬脑膜外出血	顶骨骨折;血友病A型;头皮血肿;慢性失血性贫血;幼儿腹泻	好转	王菊香	胡玲珑	陈敏3
64	A10(儿血)	2024-10-17	2024-11-21	3570647	唐鸿	男	4Y	肾上腺周围组织恶性肿瘤	为肿瘤化学治疗疗程;败血症;肺炎;化疗后骨髓抑制;股骨颈骨折;弓形虫病	好转	王菊香	王菊香	王瑶	闭合性[经皮][针吸]腹内肿块活组织检查;静脉注射化疗药物;骨髓穿刺术
65	B04儿科呼吸	2024-07-24	2024-07-30	3527169	陈立约	男	3Y	EB病毒感染	跖骨骨折	好转	胡晓光	胡晓光	朱丽丽
66	B04儿科呼吸	2024-09-01	2024-09-03	3540822	王昱涵	男	4Y	急性支气管炎	慢性浅表性胃炎;骨折术后恢复期;鼾症	治愈	郑仰明	李海燕	方励
67	B04儿科呼吸	2024-09-02	2024-09-08	3542342	张瑜绡	女	4Y	枕骨骨折	颅腔积气;头部的损伤;支气管肺炎	好转	郑仰明	李海燕	方励
68	B04儿科呼吸	2024-08-20	2024-09-17	3545928	祁琪	女	12Y	支气管肺炎	肺不张;特发性肺纤维化;肺气肿;肋骨骨折;锁骨骨折;手术后恢复期;股骨髁上骨折;喉返神经麻痹;膈神经损伤;焦虑状态	治愈	郑仰明	李海燕	徐昌富	支气管袖状切除术;支气管镜下诊断性支气管肺泡灌洗[BAL];支气管镜下支气管病损冷冻术;支气管镜下支气管病损冷冻术
69	B04儿科呼吸	2024-10-01	2024-10-07	3553039	叶刘成	男	1Y	支气管肺炎	颞骨骨折;顶骨骨折;创伤性硬脑膜外出血	治愈	郑仰明	郑仰明	张雪雅
70	B04儿科呼吸	2024-10-09	2024-10-14	3555365	方伊恩	女	4Y	肺炎支原体性肺炎	低钾血症;锁骨骨折	好转	张海邻	苏苗赏	李巧玲
71	B04儿科呼吸	2024-11-25	2024-11-29	3573830	朱泓杰	男	11Y	上呼吸道疾病，其他特指的	慢性胃炎;十二指肠炎;骨折术后	好转	郑仰明	郑仰明	徐昌富
72	B04儿科呼吸	2024-12-29	2024-12-30	3586242	祁琪	女	12Y	支气管狭窄	先天性气管发育异常;重症肺炎;耐甲氧西林金黄色葡萄球菌感染;膝关节僵硬;锁骨骨折;肋骨骨折;股骨颈骨折;股骨髁上骨折;喉返神经疾患;膈神经损伤;环性心境人格	好转	郑仰明	温顺航	张雪雅	支气管球囊扩张术
73	B06(儿传)	2024-10-02	2024-10-11	3554211	徐俊寒	男	3Y	开放性下颌骨骨折	髁突骨折;创伤后伤口感染	好转	陈洁6	刘琦	刘琦
74	B06(儿传)	2024-11-14	2024-12-21	3582291	田旭	男	13Y	桡骨颈骨折	前臂桡神经损伤;坏死性淋巴结炎;粒细胞缺乏;急性上呼吸道感染	治愈	石海矾	夏蝉	钟佩佩	桡骨骨折切开复位螺钉内固定术;关节软骨修复术;腹股沟淋巴结活组织检查
75	C03眼科口腔	2023-12-22	2024-01-01	3465752	许雪峰	女	48Y	腰椎骨折	腰椎退行性病变;腰椎间盘突出;创伤性湿肺;肾结石	治愈	赵友明	柯陈荣	汪吉棋	腰椎骨折切开复位内固定术
76	C03眼科口腔	2023-12-30	2024-01-01	3465870	周汝林	男	51Y	楔状骨骨折(足)	跗跖关节脱位;老年性心脏瓣膜病;肺诊断性影像异常;肝回声不均;前列腺增生;前列腺结石	好转	赵友明	柯陈荣	汪吉棋
77	C03眼科口腔	2023-12-30	2024-01-03	3466707	向仕见	男	49Y	眶底骨折	特发性(原发性)高血压	治愈	冯旺强	杨顺海	宋广伟	眶骨骨折切开复位内固定术
78	C03眼科口腔	2023-12-30	2024-01-03	3466712	陈君新	男	56Y	取除骨折内固定装置	脂肪肝;前列腺结石;老年性心脏瓣膜病	其他	赵友明	柯陈荣	汪吉棋	尺骨内固定装置去除术
79	C03眼科口腔	2023-12-22	2024-01-03	3466768	舒兵	男	29Y	眶顶骨折	鼻骨骨折;面部挫伤;上颌窦筛窦炎	治愈	韩晓辉	董志章	林达	鼻骨折闭合性复位术;眶骨骨折切开复位内固定术;鼻骨折闭合性复位术
80	C03眼科口腔	2023-12-30	2024-01-03	3466829	王杰	男	18Y	眶底骨折	颧骨和上颌骨骨折	治愈	韩晓辉	杨顺海	林达	眶骨骨折切开复位内固定术;颧骨骨折切开复位内固定术;上颌骨骨折切开复位内固定术
81	C03眼科口腔	2023-12-31	2024-01-04	3466145	郑玉姬	女	49Y	取除骨折内固定装置	特发性(原发性)高血压	其他	韩晓辉	杨顺海	林达	上颌骨内固定装置取出术
82	C03眼科口腔	2024-01-03	2024-01-04	3466982	万寿云	男	61Y	全部(外部)眼肌麻痹	第三［动眼］神经麻痹;白内障;弱视;眶骨骨折;颧骨和上颌骨骨折	治愈	查屹	夏哲人	郭燕	两条或两条以上眼外肌的后徙术
83	C03眼科口腔	2023-12-29	2024-01-06	3467687	张丽丽	女	66Y	胫腓骨干骨折	高血压;2型糖尿病;孤立性肺结节;下肢动脉粥样硬化;纵隔淋巴结肿大	治愈	陈华	孙辽军	陈春慧	胫骨骨折切开复位钢板内固定术
84	C03眼科口腔	2023-12-17	2024-01-06	3467691	林苏云	女	41Y	胫骨干骨折	踝关节骨折	治愈	赵友明	柯陈荣	汪吉棋	胫骨骨折切开复位钢板内固定术;胫骨人工骨植骨术;石膏绷带固定
85	C03眼科口腔	2023-12-26	2024-01-07	3468316	李平兴	男	53Y	趾部挤压伤	拇趾骨折;高血压;2型糖尿病;脂肪肝;后天性肾囊肿	治愈	陈龙	应晓洲	应晓洲	趾截断术;皮肤和皮下坏死组织切除清创术
86	C03眼科口腔	2024-01-03	2024-01-08	3468554	傅红妹	女	57Y	取除骨折内固定装置	腰椎退行性病变;肺诊断性影像异常;主动脉钙化;胆囊息肉;脂肪肝;下肢动脉粥样硬化;老年性心脏瓣膜病	其他	赵友明	柯陈荣	汪吉棋	踝关节内固定装置去除术
87	C03眼科口腔	2024-01-03	2024-01-08	3468558	黄付根	男	58Y	取除骨折内固定装置	肺部感染;肺气肿;下肢动脉粥样硬化;老年性心脏瓣膜病	其他	赵友明	柯陈荣	汪吉棋	尺骨内固定装置去除术
88	C03眼科口腔	2023-12-27	2024-01-10	3469566	翁云海	男	33Y	开放性多发性掌骨骨折	手部指伸肌腱损伤;乙型病毒性肝炎病原携带者;胆囊息肉;后天性肾囊肿	治愈	赵友明	柯陈荣	汪吉棋	掌骨骨折切开复位钢板内固定术;伸指肌腱缝合术;掌骨人工骨植骨术;石膏绷带固定
89	C03眼科口腔	2024-01-09	2024-01-10	3469777	李必华	男	47Y	眶底骨折	特发性(原发性)高血压	治愈	冯旺强	杨顺海	林达	眶骨骨折切开复位内固定术
90	C03眼科口腔	2024-01-09	2024-01-11	3470231	孙小冰	女	28Y	眶底骨折		治愈	韩晓辉	杨顺海	林达	眶骨骨折切开复位内固定术
91	C03眼科口腔	2024-01-07	2024-01-11	3470249	冉凤英	女	32Y	取除骨折内固定装置	脂肪肝;肝钙化灶	其他	黄俊武	余贤斌	郑文浩	桡骨和尺骨置入装置去除
92	C03眼科口腔	2024-01-06	2024-01-12	3470478	刘碧英	女	43Y	取除骨折内固定装置		其他	陈华	孙辽军	陈春慧	锁骨内固定装置去除术
93	C03眼科口腔	2024-01-08	2024-01-13	3470945	戴汉林	男	62Y	取除骨折内固定装置	陈旧性肋骨骨折;颈椎病;腰椎间盘突出;风湿病;肺诊断性影像异常;主动脉钙化;冠状动脉粥样硬化;前列腺结石	其他	赵友明	柯陈荣	汪吉棋	肩锁关节内固定物取出术
94	C03眼科口腔	2024-01-07	2024-01-13	3470971	张金英	女	55Y	腰椎骨折L2	脊椎退行性病变;腰椎间盘突出;在踝和足水平的韧带破裂;滑膜囊肿;脂肪肝	好转	赵友明	柯陈荣	汪吉棋
95	C03眼科口腔	2024-01-08	2024-01-13	3470984	鲍宗本	男	41Y	取除骨折内固定装置	肺诊断性影像异常	其他	赵友明	柯陈荣	汪吉棋	桡骨内固定装置去除术
96	C03眼科口腔	2024-01-09	2024-01-13	3471089	黄银萍	女	57Y	取除骨折内固定装置	脂肪肝;后天性肾囊肿;下肢静脉曲张	其他	翁益民	翁益民	王特	胫骨内固定装置去除术
97	C03眼科口腔	2023-12-27	2024-01-13	3471118	阮君华	男	40Y	跖骨骨折	拇趾骨折;趾骨骨折;趾伸肌腱断裂;脂肪肝	治愈	赵友明	柯陈荣	汪吉棋	跖骨骨折切开复位钢针内固定术;趾骨骨折切开复位钢针内固定术;跖骨植骨术;关节软骨修复术;拔甲术;趾骨骨折切开复位钢针内固定术;趾肌腱缝合术
98	C03眼科口腔	2024-01-09	2024-01-14	3471395	林致远	男	17Y	取除骨折内固定装置	脂肪肝	其他	陈华	孙辽军	陈春慧	股骨内固定装置去除术
99	C03眼科口腔	2024-01-06	2024-01-14	3471443	李运树	男	49Y	取除骨折内固定装置	皮瓣移植状态;脂肪肝;胆囊息肉;肾结石;后天性肾囊肿	其他	陈华	孙辽军	陈春慧	跖骨内固定装置去除术
100	C03眼科口腔	2024-01-08	2024-01-14	3471491	高新文	男	52Y	锁骨骨折	肾结石;前列腺增生;前列腺结石;脂肪肝	好转	石成弟	方文来	方文来	锁骨骨折切开复位钢板内固定术
101	C03眼科口腔	2023-12-20	2024-01-14	3471621	戴金林	男	69Y	下颌骨骨折	上颌骨骨折;脑挫伤;创伤性蛛网膜下腔出血;肋骨骨折;肺挫伤;股骨粗隆间骨折	治愈	聂鑫	聂鑫	于健涛	下颌骨骨折切开复位内固定术;上颌骨骨折切开复位内固定术
102	C03眼科口腔	2024-01-14	2024-01-15	3472136	李凤雪	女	11Y	取除骨折内固定装置		其他	韩晓辉	杨顺海	林达	上颌骨内固定装置取出术
103	C03眼科口腔	2024-01-14	2024-01-15	3472221	张乐	男	31Y	取除骨折内固定装置	白内障	其他	韩晓辉	杨顺海	林达	上颌骨内固定装置取出术
104	C03眼科口腔	2024-01-09	2024-01-16	3472700	李萍	女	51Y	下颌骨骨折	高血压;癫痫	治愈	聂鑫	徐兴侨	于健涛	下颌骨骨折切开复位内固定术
105	C03眼科口腔	2024-01-11	2024-01-19	3474234	王松来	男	70Y	胫骨平台骨折	高血压;痛风;心功能不全;脂肪肝;肝囊肿;胆囊息肉;后天性肾囊肿;孤立性肺结节;前列腺增生;前列腺结石	治愈	陈华	孙辽军	陈春慧	胫骨骨折切开复位螺钉内固定术;膝关节后交叉韧带重建术
106	C03眼科口腔	2024-01-06	2024-01-20	3474605	杨仲献	男	47Y	眼撕裂伤和破裂伴有眼内组织脱出或缺失	眼睑裂伤;眶骨骨折;慢性萎缩性胃炎	治愈	郑穗联	夏哲人	郭燕	眼球摘除伴义眼台置入术;眼睑裂伤缝合术;眦成形术;结膜囊成形术
107	C03眼科口腔	2024-01-10	2024-01-20	3474619	刘夙华	男	28Y	颧骨和上颌骨骨折		治愈	聂鑫	肖进	于健涛	颧骨骨折切开复位内固定术;上颌骨骨折切开复位内固定术
108	C03眼科口腔	2024-01-11	2024-01-20	3474673	王爱平	女	56Y	髌骨骨折	心功能不全	治愈	陈华	孙辽军	陈春慧	髌骨骨折切开复位张力带钢丝内固定术;关节软骨修复术
109	C03眼科口腔	2024-01-16	2024-01-21	3475091	赵秀凤	女	35Y	取除骨折内固定装置	心功能不全;肝钙化灶	其他	陈华	孙辽军	陈春慧	锁骨内固定装置去除术
110	C03眼科口腔	2024-01-12	2024-01-22	3475649	彭花妹	女	71Y	锁骨骨折	高血压;脂肪肝	好转	翁益民	翁益民	王特	锁骨骨折切开复位钢板内固定术
111	C03眼科口腔	2024-01-16	2024-01-22	3475654	叶雨航	男	18Y	取除骨折内固定装置		其他	翁益民	翁益民	王特	腓骨内固定装置去除术
112	C03眼科口腔	2024-01-12	2024-01-22	3475708	胡后凤	女	69Y	肱骨外科颈骨折	老年性脑萎缩;下肢静脉曲张	好转	翁益民	翁益民	王特	肱骨骨折切开复位钢板内固定术
113	C03眼科口腔	2024-01-18	2024-01-22	3475744	何立人	男	14Y	取除骨折内固定装置		其他	翁益民	翁益民	王特	锁骨内固定装置去除术
114	C03眼科口腔	2024-01-18	2024-01-22	3475795	张新	男	14Y	取除骨折内固定装置		其他	翁益民	翁益民	王特	锁骨内固定装置去除术
115	C03眼科口腔	2024-01-12	2024-01-22	3475863	李娇飞	女	21Y	眶骨骨折	额窦骨折;上颌骨骨折;脑挫伤;面部挫伤;多处挫伤;肝钙化灶;肾结石	治愈	韩晓辉	杨顺海	林达	眶骨骨折切开复位内固定术;颅骨骨折复位术
116	C03眼科口腔	2024-01-16	2024-01-22	3475967	洪剑豪	男	12Y	取除骨折内固定装置		其他	翁益民	翁益民	王特	股骨内固定装置去除术
117	C03眼科口腔	2024-01-13	2024-01-22	3475970	徐小玲	女	20Y	胫骨骨干骨折	脂肪肝	好转	翁益民	翁益民	王特	胫骨骨折切开复位钢板内固定术
118	C03眼科口腔	2024-01-16	2024-01-22	3475981	龙宏洋	男	48Y	肱骨大结节骨折	脂肪肝	好转	翁益民	翁益民	王特	肱骨骨折切开复位钢板内固定术
119	C03眼科口腔	2024-01-18	2024-01-22	3475991	郑君昊	男	15Y	取除骨折内固定装置		其他	翁益民	翁益民	王特	胫骨和腓骨置入装置去除
120	C03眼科口腔	2024-01-10	2024-01-22	3476115	陈柏青	男	58Y	外伤性白内障	人工晶体移位;继发性青光眼;创伤性硬脑膜外血肿;创伤性蛛网膜下腔出血;颅骨和面骨多发性骨折;多处挫伤;牙龈开放性损伤;颈椎间盘突出;2型糖尿病;特发性(原发性)高血压;脂肪肝;后天性肾囊肿	治愈	韩晓辉	杨顺海	林达	晶状体单纯抽吸囊外摘除术;后入路玻璃体切割术
121	C03眼科口腔	2024-01-11	2024-01-22	3476160	戴冬香	女	57Y	眶骨骨折	眼周区挫伤;面部软组织挫伤;冈上肌肌腱损伤;肩关节积液;腰椎间盘变性;脊椎退行性病变;脂肪肝;肝囊肿;肾错构瘤;后天性肾囊肿	治愈	韩晓辉	杨顺海	林达	眶骨骨折切开复位内固定术
122	C03眼科口腔	2024-01-21	2024-01-22	3476188	牛敏	女	36Y	眶骨骨折		治愈	韩晓辉	董志章	林达	眶骨骨折切开复位内固定术
123	C03眼科口腔	2024-01-25	2024-01-26	3477455	贡香港	男	22Y	泪小管裂伤	眼睑裂伤;眶骨骨折	治愈	冯旺强	杨顺海	宋广伟	泪小管吻合术;泪小管穿线插管术;眦成形术
124	C03眼科口腔	2024-01-26	2024-01-31	3478082	陈华巍	男	22Y	眼撕裂伤和破裂伴有眼内组织脱出或缺失	玻璃体积血;眼睑裂伤;眶骨骨折	治愈	冯旺强	董志章	宋广伟	眼球破裂修补术;结膜裂伤修补术;眦成形术;前房成形术;玻璃体其他手术
125	C03眼科口腔	2024-02-27	2024-02-28	3481203	李恩情	男	41Y	眶骨骨折	视神经损伤	治愈	韩晓辉	杨顺海	林达	眶骨骨折切开复位内固定术
126	C03眼科口腔	2024-03-03	2024-03-04	3481862	何春肖	女	56Y	取除骨折内固定装置	2型糖尿病	其他	韩晓辉	杨顺海	林达	去除面骨内固定装置
127	C03眼科口腔	2024-03-09	2024-03-10	3483038	李茜茜	女	30Y	取除骨折内固定装置	肝囊肿;肝回声不均	其他	陈龙	应晓洲	应晓洲	锁骨内固定装置去除术
128	C03眼科口腔	2024-02-24	2024-03-11	3483175	吕照杰	男	46Y	眼撕裂伤不伴有眼内组织脱出或缺失	视网膜脱离;脉络膜脱离;眶骨骨折;上睑下垂;眼睑裂伤;泪小管裂伤	治愈	韩晓辉	杨顺海	林达	眼球破裂修补术;泪小管吻合术;眦成形术;带蒂皮瓣移植术;前入路玻璃体切割术;眶骨骨折切开复位内固定术;上颌骨骨折切开复位内固定术;颧骨骨折切开复位内固定术
129	C03眼科口腔	2024-02-29	2024-03-11	3483183	叶信滔	男	40Y	眶骨骨折	额骨骨折;颧骨骨折;蝶骨骨折;脑挫伤;创伤性硬脑膜外血肿;创伤性蛛网膜下腔出血;肺炎	治愈	韩晓辉	杨顺海	林达	眶骨骨折切开复位内固定术;颅骨骨折复位术
130	C03眼科口腔	2024-02-20	2024-03-11	3483265	陈佩璐	女	7Y	眶骨骨折	脑挫伤;创伤性硬脑膜下出血;颅骨骨折;颧弓骨折;头皮血肿;肺挫伤;气胸;寰枢关节扭伤;多处挫伤;慢性失血性贫血	治愈	韩晓辉	杨顺海	林达	眶骨骨折切开复位内固定术
131	C03眼科口腔	2024-03-10	2024-03-11	3483277	刘秋云	女	54Y	取除骨折内固定装置	骨折术后恢复期	其他	韩晓辉	董志章	林达	去除面骨内固定装置
132	C03眼科口腔	2024-03-11	2024-03-13	3483697	陈小莉	女	46Y	取除骨折内固定装置	后天性肾囊肿;肾错构瘤	其他	陈龙	应晓洲	应晓洲	髌骨内固定装置去除术
133	C03眼科口腔	2024-03-11	2024-03-16	3484338	陈献军	男	36Y	肱骨外髁骨折	尺侧副韧带创伤性破裂;高血压;脂肪肝;后天性肾囊肿;前列腺结石;肝功能检查的异常结果	治愈	陈龙	应晓洲	应晓洲	肱骨骨折切开复位螺钉内固定术;肘关节的其他修补术
134	C03眼科口腔	2024-03-13	2024-03-18	3484824	陈润泽	男	33Y	锁骨骨折	肝功能检查的异常结果;脂肪肝	治愈	陈龙	应晓洲	应晓洲	锁骨骨折切开复位钢板内固定术;锁骨人工骨植骨术
135	C03眼科口腔	2024-03-10	2024-03-21	3485588	李鹏翔	男	29Y	颧骨和上颌骨骨折	眶底骨折	治愈	聂鑫	肖进	于健涛	颧骨骨折切开复位内固定术;上颌骨骨折切开复位内固定术;眶壁骨折切开复位术
136	C03眼科口腔	2024-03-16	2024-03-22	3485795	余节克	男	40Y	眶骨骨折	上颌骨骨折;颧弓骨折;视神经受压;多处挫伤	治愈	韩晓辉	杨顺海	林达	眶骨骨折切开复位内固定术;上颌骨骨折切开复位内固定术
137	C03眼科口腔	2024-03-15	2024-03-25	3486578	黄宝田	男	66Y	眼球穿通伤伴磁性异物	眼撕裂伤和破裂伴有眼内组织脱出或缺失;眶骨骨折;白内障;痛风	治愈	冯旺强	杨顺海	林达	玻璃体异物磁吸术;眼球破裂修补术;后入路玻璃体切割术;前房冲洗术
138	C03眼科口腔	2024-03-23	2024-03-25	3486630	包举逸	男	5Y	肱骨髁上骨折		治愈	陈龙	应晓洲	应晓洲	肱骨骨折闭合复位钢针内固定术
139	C03眼科口腔	2024-03-15	2024-03-26	3486786	汪祥东	男	55Y	眼球穿通伤伴非磁性异物	眼撕裂伤和破裂伴有眼内组织脱出或缺失;创伤性视网膜脱离;创伤性脉络膜脱离;眶骨骨折;上颌骨骨折;鼻骨骨折;脑挫伤;脂肪肝	治愈	冯旺强	杨顺海	林达	眼球破裂修补术;去除眼穿透性异物;结膜囊成形术;眼睑裂伤缝合术;后入路玻璃体切割术;白内障囊外摘除术;前房冲洗术
140	C03眼科口腔	2024-03-21	2024-03-27	3487150	尤克璋	男	59Y	颧骨和上颌骨骨折		治愈	聂鑫	肖进	于健涛	颧骨骨折切开复位内固定术;上颌骨骨折切开复位内固定术
141	C03眼科口腔	2024-03-21	2024-03-28	3487439	王东阳	男	9Y	下颌骨骨折		治愈		聂鑫		下颌骨骨折切开复位内固定术
142	C03眼科口腔	2024-03-16	2024-03-31	3488158	池正六	男	62Y	眼外肌断裂	结合膜损伤和角膜擦伤，未提及异物;创伤性晶状体脱位;玻璃体积血;视网膜脱离;脉络膜脱离;白内障;眶骨骨折;头皮裂伤;肝硬化;2型糖尿病	治愈	蔡剑秋	夏哲人	郭燕	眼外肌损伤修补术;结膜缝合术;后入路玻璃体切割术伴替代物注入;视网膜脱离激光治疗术;晶状体其他囊外摘出术
143	C03眼科口腔	2024-03-30	2024-04-01	3488455	李天朋	男	54Y	取除骨折内固定装置	白内障;高血压	其他	韩晓辉	杨顺海	林达	去除面骨内固定装置
144	C03眼科口腔	2024-03-30	2024-04-01	3488508	王丽莹	女	13Y	取除骨折内固定装置		其他	韩晓辉	杨顺海	林达	去除面骨内固定装置
145	C03眼科口腔	2024-03-31	2024-04-02	3488775	许爱梅	女	75Y	视网膜脱离	白内障;下肢静脉血栓形成;骨折治疗后恢复期;脑挫伤;创伤性蛛网膜下腔出血;脑室出血	治愈	蔡剑秋	夏哲人	张煜	后入路玻璃体切割术;白内障超声乳化抽吸术;视网膜脱离激光治疗术
146	C03眼科口腔	2024-03-27	2024-04-02	3488912	杨佳慧	女	23Y	取除骨折内固定装置		其他	聂鑫	肖进	于健涛	下颌骨内固定装置取出术
147	C03眼科口腔	2024-03-31	2024-04-03	3489113	郑小春	女	57Y	取除骨折内固定装置	胆囊结石;多发性肝囊肿;主动脉钙化	其他	潘孝云	杨阳	薛星河	髌骨内固定装置去除术
148	C03眼科口腔	2024-03-29	2024-04-03	3489131	王艳艳	女	20Y	颧弓骨折	上颌骨骨折	好转	聂鑫	肖进	于健涛
149	C03眼科口腔	2024-03-24	2024-04-03	3489238	王陈簪	女	44Y	下颌骨骨折	鼻骨骨折;口腔开放性损伤;牙脱位	好转	聂鑫	肖进	于健涛	下颌骨骨折切开复位内固定术
150	C03眼科口腔	2024-04-01	2024-04-04	3489533	赵豪杰	男	13Y	取除骨折内固定装置	脂肪肝	其他	陈龙	应晓洲	应晓洲	胫骨内固定装置去除术
151	C03眼科口腔	2024-04-01	2024-04-04	3489540	潘建兵	男	44Y	取除骨折内固定装置	肝硬化;脾大;肝钙化灶;肝囊肿	其他	陈龙	应晓洲	应晓洲	肩锁关节内固定物取出术
152	C03眼科口腔	2024-04-01	2024-04-05	3489667	高黎形	男	24Y	取除骨折内固定装置	前列腺结石;孤立性肺结节	其他	翁益民	翁益民	王特	股骨内固定装置去除术
153	C03眼科口腔	2024-03-31	2024-04-05	3489728	金胜建	男	50Y	掌骨骨折	肺部感染;脂肪肝	治愈	陈龙	应晓洲	应晓洲	掌骨骨折切开复位钢板内固定术
154	C03眼科口腔	2024-04-01	2024-04-07	3490275	叶凤梅	女	50Y	取除骨折内固定装置	脂肪肝;肝囊肿	其他	翁益民	翁益民	王特	胫骨内固定装置去除术
155	C03眼科口腔	2024-04-06	2024-04-08	3490415	阮国强	男	45Y	取除骨折内固定装置		其他	韩晓辉	杨顺海	林达	去除面骨内固定装置
156	C03眼科口腔	2024-04-07	2024-04-08	3490514	江志雄	男	14Y	取除骨折内固定装置	视神经损伤	其他	韩晓辉	杨顺海	林达	去除面骨内固定装置
157	C03眼科口腔	2024-03-31	2024-04-09	3490881	赵强	男	21Y	下颌骨骨折		治愈	聂鑫	肖进	于健涛	下颌骨骨折切开复位内固定术;髁突摘除术;颌间结扎
158	C03眼科口腔	2024-04-01	2024-04-09	3491001	张启江	男	46Y	眶骨骨折	颧弓骨折;软组织感染	治愈	韩晓辉	杨顺海	林达	眶骨骨折切开复位内固定术;颧骨骨折切开复位内固定术;创面封闭式负压引流术（VSD)
159	C03眼科口腔	2024-04-08	2024-04-13	3491973	黄秀娇	女	56Y	取除骨折内固定装置	胆囊结石;后天性肾囊肿	其他	赵友明	柯陈荣	汪吉棋	桡骨内固定装置去除术
160	C03眼科口腔	2024-04-11	2024-04-13	3491989	梁德宗	男	56Y	眼球破裂伤	眼球贯通伤伴有异物;白内障;角膜烧伤;翼状胬肉;眶骨骨折;多处烧伤	好转	董志章	杨顺海	骆伊丽
161	C03眼科口腔	2024-04-08	2024-04-13	3492214	李守龙	男	33Y	踝关节骨折	胆囊息肉;肾结石;后天性肾囊肿	好转	翁益民	翁益民	王特	踝关节骨折闭合复位螺钉内固定术
162	C03眼科口腔	2024-04-06	2024-04-15	3492694	金雪平	女	54Y	胫骨干骨折伴腓骨骨折	老年性心脏瓣膜病;脂肪肝	治愈	赵友明	柯陈荣	汪吉棋	胫骨骨折切开复位钢板内固定术;胫骨人工骨植骨术;石膏绷带固定
163	C03眼科口腔	2024-03-26	2024-04-15	3492814	付奎	男	44Y	颧骨和上颌骨骨折	颞骨骨折;桡骨远端骨折;前臂正中神经损伤;下尺桡关节脱位;尺骨冠突骨折;桡骨头骨折;眶骨骨折;脂肪肝;单纯性肾囊肿	治愈	聂鑫	高伟阳	于健涛	桡骨骨折切开复位钢板内固定术;颧骨骨折切开复位内固定术;上颌骨骨折切开复位内固定术;眶骨骨折切开复位内固定术
164	C03眼科口腔	2024-04-14	2024-04-15	3492833	马永光	男	51Y	取除骨折内固定装置		其他	韩晓辉	杨顺海	林达	去除面骨内固定装置
165	C03眼科口腔	2024-04-14	2024-04-15	3492845	万小马	男	29Y	取除骨折内固定装置		其他	韩晓辉	杨顺海	骆伊丽	去除面骨内固定装置
166	C03眼科口腔	2024-04-14	2024-04-15	3492849	高钻强	男	25Y	眶骨骨折		治愈	韩晓辉	杨顺海	宋广伟	眶骨骨折切开复位内固定术
167	C03眼科口腔	2024-04-11	2024-04-16	3493142	吴思雅	女	8Y	取除骨折内固定装置		其他	聂鑫	肖进	于健涛	下颌骨内固定装置取出术
168	C03眼科口腔	2024-04-11	2024-04-16	3493181	邵金龙	男	51Y	取除骨折内固定装置	脂肪肝;腰骶椎间盘突出;下肢静脉曲张	其他	孙辽军	孙辽军	陈春慧	掌骨内固定装置去除术
169	C03眼科口腔	2024-04-16	2024-04-16	3493330	孙广隆	男	32Y	眶骨骨折	由于其他原因而未进行操作	未愈	韩晓辉	杨顺海	林达
170	C03眼科口腔	2024-04-09	2024-04-17	3493515	张敏	女	54Y	尺骨鹰嘴骨折	脂肪肝;孤立性肺结节	好转	翁益民	翁益民	王特	尺骨骨折切开复位钢针内固定术
171	C03眼科口腔	2024-04-11	2024-04-17	3493650	林招兰	女	50Y	尺骨鹰嘴骨折	肱三头肌肌腱损伤;脂肪肝;胆囊结石;肝钙化灶;后天性肾囊肿;肺钙化	好转	翁益民	王特	王特	尺骨骨折切开复位螺钉内固定术;上肢肌腱缝合术
172	C03眼科口腔	2024-04-15	2024-04-20	3494242	李宛左	女	50Y	取除骨折内固定装置	孤立性肺结节;甲状腺结节	其他	翁益民	翁益民	王特	胫骨内固定装置去除术
173	C03眼科口腔	2024-04-11	2024-04-20	3494298	何葱芬	女	55Y	桡骨远端骨折	尺骨茎突骨折;腕骨骨折;孤立性肺结节;特发性肺纤维化	治愈	赵友明	柯陈荣	汪吉棋	桡骨骨折切开复位钢板内固定术;腕关节成形术;石膏绷带固定
174	C03眼科口腔	2024-04-14	2024-04-20	3494422	戴银雷	男	37Y	眶骨骨折	颧骨和上颌骨骨折;额骨骨折;眼挫伤;创伤性颅内积气;创伤性硬脑膜外血肿;头皮挫伤;多处挫伤;肺气肿;前列腺钙化灶;颈椎退行性病变;颈椎间盘突出	治愈	韩晓辉	杨顺海	骆伊丽	眶骨骨折切开复位内固定术;颧骨骨折切开复位内固定术
175	C03眼科口腔	2024-04-08	2024-04-20	3494445	王鹏	男	22Y	眼撕裂伤和破裂伴有眼内组织脱出或缺失	视网膜脱离;眼内出血;眶内异物;面部裂伤;眼睑裂伤;鼻开放性伤口;膝开放性伤口;桡骨远端骨折;软组织感染	治愈	冯旺强	杨顺海	林达	眼球破裂修补术;眶内表浅异物去除;结膜囊成形术;眦成形术;后入路玻璃体切割术伴替代物注入;玻璃体腔重水注射术，视网膜复位术;视网膜裂孔电凝术;视网膜病损激光凝固术
176	C03眼科口腔	2024-04-16	2024-04-21	3494668	徐祥峰	男	41Y	取除骨折内固定装置	脂肪肝	其他	潘孝云	黄益奖	林剑2	髌骨内固定装置去除术
177	C03眼科口腔	2024-04-15	2024-04-21	3494847	伍亨松	男	54Y	掌骨骨折	肺部感染;脂肪肝;胆囊结石;肾结石;肝囊肿	治愈	赵友明	柯陈荣	汪吉棋	掌骨骨折切开复位钢板内固定术
178	C03眼科口腔	2024-04-15	2024-04-21	3494849	陈莲芳	女	58Y	锁骨骨折	耻骨骨折;肾结石;主动脉硬化;胸腔积液;孤立性肺结节	治愈	赵友明	柯陈荣	汪吉棋	锁骨骨折切开复位钢板内固定术;锁骨人工骨植骨术
179	C03眼科口腔	2024-04-10	2024-04-22	3495049	林巧	女	31Y	胫腓骨干骨折	肺大疱	治愈	翁益民	翁益民	王特	胫骨骨折切开复位钢板内固定术;腓骨骨折闭合复位髓内针内固定术
180	C03眼科口腔	2024-04-15	2024-04-22	3495225	郑国象	男	36Y	肩关节脱位	孤立性肺结节;陈旧性肩胛骨骨折	治愈	潘孝云	黄益奖	林剑2	关节镜习惯性肩关节脱位修补术
181	C03眼科口腔	2024-04-16	2024-04-23	3495639	陈启勤	男	64Y	胫骨平台骨折	肺占位性病变;肺肿物;2型糖尿病;肝囊肿;胆囊结石;后天性肾囊肿;肾结石;下肢动脉粥样硬化;乙型病毒性肝炎	治愈	陈龙	应晓洲	应晓洲	胫骨骨折切开复位钢板内固定术;膝关节的其他修补术;胫骨人工骨植骨术
182	C03眼科口腔	2024-04-22	2024-04-24	3495932	梁德宗	男	56Y	眼球贯通伤伴有异物	白内障;角膜裂伤;翼状胬肉;眶骨骨折;多处烧伤	治愈	董志章	杨顺海	骆伊丽	白内障超声乳化抽吸术;眼前节非磁性异物取出术;白内障摘除伴人工晶体一期置入术
183	C03眼科口腔	2024-04-17	2024-04-24	3495950	李一川	男	17Y	锁骨骨折	脂肪肝;肺诊断性影像异常	好转	陈华	孙辽军	陈春慧	锁骨骨折切开复位钢板内固定术
184	C03眼科口腔	2024-04-15	2024-04-25	3496230	李迪	男	24Y	眼撕裂伤不伴有眼内组织脱出或缺失	玻璃体积血;创伤性视网膜脱离;创伤性脉络膜脱离;晶状体不全脱位;眼睑裂伤;眶骨骨折;眼睑和眼周区挫伤	治愈	冯旺强	杨顺海	林达	眼球破裂修补术;结膜囊成形术;前房成形术;后入路玻璃体切割术
185	C03眼科口腔	2024-04-12	2024-04-25	3496233	潘建秀	男	42Y	眶骨骨折	外斜视;多处挫伤;阵发性室上性心动过速;痛风性肾病;后天性肾囊肿;心包积液;阑尾术后	好转	韩晓辉	杨顺海	林达
186	C03眼科口腔	2024-04-16	2024-04-25	3496237	高美柳	女	59Y	胫骨平台伴腓骨骨折	膝关节积液;慢性乙型病毒性肝炎;肝囊肿;下肢静脉血栓形成	好转	陈华	孙辽军	陈春慧	胫骨骨折切开复位钢板内固定术;膝关节的其他修补术;胫骨人工骨植骨术
187	C03眼科口腔	2024-04-24	2024-04-26	3496438	陈永宝	男	67Y	锁骨骨折	高血压;心肌病;肺肿物;前列腺增生;前列腺结石	好转	黄义星	黄义星	卢迪
188	C03眼科口腔	2024-04-16	2024-04-27	3496657	朱春香	女	57Y	胫腓骨下端骨折	腰椎退行性病变;头皮血肿;脂肪肝;胆囊腺肌症;孤立性肺结节;骶骨骨折;肝功能检查的异常结果	治愈	陈龙	应晓洲	应晓洲	胫骨骨折切开复位钢板内固定术;腓骨骨折闭合复位髓内针内固定术
189	C03眼科口腔	2024-04-16	2024-04-27	3496664	金献直	男	45Y	两趾切断	拇趾骨折;趾骨骨折，其他的;脂肪肝;胆囊息肉;单纯性肾囊肿;肾结石;前列腺增生;前列腺结石	好转	翁益民	翁益民	王特	趾骨骨折切开复位钢针内固定术;皮肤和皮下坏死组织切除清创术;拔甲术;甲成形术
190	C03眼科口腔	2024-04-17	2024-04-27	3496671	曾小凤	女	30Y	肱骨头骨折	电击伤;脂肪肝;低蛋白血症	治愈	赵友明	赵友明	柯陈荣	肱骨骨折切开复位钢针内固定术;肩关节的其他修补术;肱骨人工骨植骨术
191	C03眼科口腔	2024-04-20	2024-04-27	3496890	杨小波	男	30Y	眶骨骨折	颧弓骨折;视神经损伤;鼻骨骨折;脑挫伤	治愈	韩晓辉	杨顺海	林达	眶骨骨折切开复位内固定术;颧骨骨折切开复位内固定术
192	C03眼科口腔	2024-04-17	2024-04-28	3497107	叶太明	男	65Y	距骨骨折	胸腔积液;骨折术后恢复期	治愈	赵友明	赵友明	柯陈荣	距骨骨折切开复位钢针内固定术;踝关节的其他修补术;石膏绷带固定
193	C03眼科口腔	2024-04-12	2024-04-30	3497727	谢绍长	男	59Y	眼撕裂伤和破裂伴有眼内组织脱出或缺失	玻璃体积血;无晶状体;创伤性视网膜脱离;创伤性脉络膜脱离;眼睑裂伤;上睑下垂;眶骨骨折;肺挫伤;液气胸;肋骨骨折;肘关节扭伤和劳损;多处挫伤	治愈	冯旺强	杨顺海	林达	眼球破裂修补术;结膜囊成形术;皮肤和皮下组织非切除性清创;皮肤缝合术;前房冲洗术;后入路玻璃体切割术;玻璃体腔重水注射术，视网膜复位术;视网膜脱离电凝术;视网膜脱离激光治疗术
194	C03眼科口腔	2024-04-18	2024-04-30	3497733	文甫强	男	48Y	眶骨骨折	颧弓骨折	治愈	韩晓辉	杨顺海	林达	眶骨骨折切开复位内固定术;上颌骨骨折切开复位内固定术;颧弓骨折切开复位术
195	C03眼科口腔	2024-04-23	2024-04-30	3497741	陈晓宇	男	43Y	下颌骨骨折		治愈	聂鑫	肖进	于健涛	颌间结扎
196	C03眼科口腔	2024-04-24	2024-04-30	3497747	胡小洁	女	61Y	桡骨远端骨折		治愈	陈龙	陈龙	应晓洲	桡骨骨折切开复位钢板内固定术;腕关节成形术
197	C03眼科口腔	2024-04-19	2024-05-01	3497936	邹佳林	男	19Y	下颌骨骨折		治愈	聂鑫	肖进	于健涛	下颌骨骨折切开复位内固定术
198	C03眼科口腔	2024-04-30	2024-05-01	3498020	刘凯	男	15Y	取除骨折内固定装置		其他	韩晓辉	杨顺海	林达	去除面骨内固定装置
199	C03眼科口腔	2024-04-16	2024-05-02	3498270	章蓝尹	女	5Y	眶骨骨折	鼻骨骨折;创伤性蛛网膜下腔出血;颅底骨折;颅腔积气;面部软组织挫伤	治愈	韩晓辉	杨顺海	林达	眶骨骨折切开复位内固定术
200	C03眼科口腔	2024-04-18	2024-05-04	3498638	林雨宣	女	11Y	眶骨骨折	颧骨和上颌骨骨折;视神经损伤;脑挫伤;创伤性蛛网膜下腔出血;眼睑裂伤	治愈	韩晓辉	杨顺海	林达	眶骨骨折切开复位内固定术;上颌骨骨折切开复位内固定术;颧骨骨折切开复位内固定术
201	C03眼科口腔	2024-05-05	2024-05-06	3499101	张雪	女	45Y	眶骨骨折		治愈	韩晓辉	杨顺海	林达	眶骨骨折切开复位内固定术
202	C03眼科口腔	2024-05-02	2024-05-06	3499138	单涵宇	男	1Y	取除骨折内固定装置		其他	聂鑫	徐兴侨	于健涛	下颌骨内固定装置取出术
203	C03眼科口腔	2024-04-27	2024-05-06	3499206	甘茗悦	女	3Y	眶骨骨折	颧骨和上颌骨骨折;鼻骨骨折;额骨骨折;颞骨骨折;枕骨骨折;创伤性硬脑膜外血肿;颅腔积气;面部裂伤;锁骨骨折;颈椎半脱位	治愈	韩晓辉	杨顺海	林达	眶骨骨折切开复位内固定术;颧骨骨折切开复位内固定术;上颌骨骨折切开复位内固定术
204	C03眼科口腔	2024-05-01	2024-05-06	3499237	王大秋	男	36Y	泪小管断裂	眼睑裂伤;眶骨骨折;颧骨和上颌骨骨折;多处挫伤	治愈	韩晓辉	林达	骆伊丽	泪小管吻合术;鼻泪管插管术;内眦成形术;眼睑裂伤缝合术;结膜裂伤修补术
205	C03眼科口腔	2024-05-07	2024-05-08	3499669	肖本汉	男	45Y	眶骨骨折	颧骨和上颌骨骨折	治愈	韩晓辉	杨顺海	林达	眶骨骨折切开复位内固定术;上颌骨骨折切开复位内固定术
206	C03眼科口腔	2024-05-06	2024-05-11	3500210	张宏利	女	34Y	取除骨折内固定装置	肋骨多处骨折	其他	翁益民	翁益民	王特	锁骨内固定装置去除术
207	C03眼科口腔	2024-05-06	2024-05-11	3500248	吴绿慧	男	32Y	取除骨折内固定装置	肾结石	其他	翁益民	翁益民	王特	胫骨内固定装置去除术
208	C03眼科口腔	2024-05-10	2024-05-12	3500678	谷婉琳	女	6Y	肱骨髁上骨折		治愈	张敬东	易先宏	潘天龙	肱骨骨折闭合复位钢针内固定术
209	C03眼科口腔	2024-04-29	2024-05-12	3500736	陈丽冬	女	54Y	下颌骨骨折		治愈	聂鑫	徐兴侨	于健涛	下颌骨骨折切开复位内固定术
210	C03眼科口腔	2024-05-12	2024-05-13	3500950	吴曰景	男	56Y	取除骨折内固定装置	双侧感音神经性听觉丧失	其他	韩晓辉	杨顺海	林达	去除面骨内固定装置
211	C03眼科口腔	2024-05-06	2024-05-13	3501043	陈冠锦	男	7Y	肱骨外髁骨折		治愈	翁益民	翁益民	王特	肱骨骨折切开复位钢针内固定术
212	C03眼科口腔	2024-04-23	2024-05-14	3501205	陈选华	女	76Y	内固定装置引起的感染	取除骨折内固定装置;软组织感染;肝囊肿	治愈	翁益民	翁益民	王特	胫骨内固定装置去除术;皮肤和皮下组织非切除性清创
213	C03眼科口腔	2024-05-07	2024-05-14	3501355	刘伟	男	35Y	泪小管裂伤	眼睑裂伤;眼球挫伤;上颌骨骨折;眶骨骨折	治愈	韩晓辉	杨顺海	林达	泪小管吻合术;鼻泪管插管术;内眦成形术;眼睑裂伤缝合术
214	C03眼科口腔	2024-05-08	2024-05-14	3501356	郑梁	男	29Y	取除骨折内固定装置		其他	聂鑫	徐兴侨	于健涛	上颌骨内固定装置取出术
215	C03眼科口腔	2024-05-09	2024-05-15	3501473	高新岱	男	20Y	桡骨远端骨折	尺骨茎突骨折	治愈	水小龙	水小龙	汪吉棋	桡骨骨折切开复位钢板内固定术
216	C03眼科口腔	2024-05-14	2024-05-15	3501649	陈仙从	男	79Y	取除骨折内固定装置	人工晶体植入状态;白内障;高血压;糖尿病;胆囊结石	其他	韩晓辉	杨顺海	林达	去除面骨内固定装置
217	C03眼科口腔	2024-05-08	2024-05-15	3501711	朱小兰	女	68Y	髌骨骨折	2型糖尿病;高脂血症	治愈	陈华	胡炜	胡炜	髌骨骨折切开复位张力带钢丝内固定术;膝关节的其他修补术
218	C03眼科口腔	2024-05-14	2024-05-15	3501784	蔡荣成	男	36Y	眶骨骨折	鼻骨骨折	治愈	韩晓辉	杨顺海	林达	眶骨骨折切开复位内固定术
219	C03眼科口腔	2024-05-06	2024-05-15	3501814	余孝五	男	51Y	眶骨骨折	颧弓骨折;上颌骨骨折;鼻骨骨折;创伤性硬脑膜下出血;面部挫伤;颈椎间盘突出;肾上腺血肿;脊椎退行性病变;肺的其他疾患	治愈	韩晓辉	杨顺海	林达	眶骨骨折切开复位内固定术;颧骨骨折切开复位内固定术;上颌骨骨折切开复位内固定术
220	C03眼科口腔	2024-05-14	2024-05-16	3502100	赵克海	男	33Y	眶骨骨折	上颌骨骨折;颧弓骨折	治愈	韩晓辉	杨顺海	林达	眶骨骨折切开复位内固定术;上颌骨骨折切开复位内固定术
221	C03眼科口腔	2024-05-08	2024-05-18	3502383	郑伊苒	女	4Y	眶骨骨折	额骨骨折;上颌窦骨折;硬膜下血肿;头皮血肿;面部软组织挫伤;脑挫伤;腹部损伤;腹腔积液	治愈	韩晓辉	杨顺海	宋广伟	眶骨骨折切开复位内固定术
222	C03眼科口腔	2024-05-11	2024-05-18	3502445	徐兴国	男	50Y	泪小管断裂	眼睑裂伤;面部软组织挫伤;脑挫伤;颈椎棘突骨折;枕骨骨折	治愈	韩晓辉	杨顺海	林达	泪小管吻合术;鼻泪管探通术;内眦成形术;泪小管穿线插管术;眼睑裂伤缝合术
223	C03眼科口腔	2024-05-10	2024-05-18	3502493	王伟	男	29Y	蒙特贾骨折脱位	孤立性肺结节	好转	孔建中	陈墨川	陈墨川	尺骨骨折切开复位钢板内固定术;尺骨人工骨植骨术
224	C03眼科口腔	2024-04-22	2024-05-18	3502494	陈武杰	男	36Y	脑挫伤	创伤性硬脑膜外血肿;眶骨骨折;颧弓骨折;创伤性蛛网膜下腔出血;颅腔积气;肺大疱;后天性肾囊肿	好转	韩晓辉	杨顺海	林达	脑内血肿清除术;颅骨去骨瓣减压术;颅骨修补术
225	C03眼科口腔	2024-05-11	2024-05-19	3502889	余顺福	男	66Y	眼撕裂伤和破裂伴有眼内组织脱出或缺失	眼内出血;眼睑裂伤;白内障;肋骨骨折	治愈	蔡剑秋	陈婕灵	张煜	眼球破裂修补术;眼睑裂伤缝合术
226	C03眼科口腔	2024-05-11	2024-05-19	3502890	潘朝霞	女	54Y	踝关节骨折	肝回声不均;肾错构瘤	治愈	陈华	胡炜	胡炜	踝关节骨折切开复位钢板内固定术;踝关节的其他修补术
227	C03眼科口腔	2024-05-19	2024-05-20	3503277	张董群	女	17Y	眶骨骨折		治愈	韩晓辉	杨顺海	宋广伟	眶骨骨折切开复位内固定术
228	C03眼科口腔	2024-05-10	2024-05-21	3503437	徐小燕	女	58Y	股骨干骨折	下肢静脉肌间血栓形成	好转	黄俊武	余贤斌	马亮亮	股骨骨折切开复位钢板内固定术;股骨人工骨植骨术
229	C03眼科口腔	2024-05-20	2024-05-21	3503496	王文芬	女	34Y	鼻骨骨折		治愈	高金建	凡启军	项海杰	鼻骨折闭合性复位术
230	C03眼科口腔	2024-05-13	2024-05-21	3503525	高文珍	女	56Y	取除骨折内固定装置		其他	聂鑫	聂鑫	于健涛	下颌骨内固定装置取出术
231	C03眼科口腔	2024-05-19	2024-05-22	3503976	朱海影	女	36Y	眶骨骨折		治愈	韩晓辉	杨顺海	林达	眶骨骨折切开复位内固定术
232	C03眼科口腔	2024-05-09	2024-05-22	3503994	梅立厂	男	48Y	眶骨骨折	颞骨骨折;颧弓骨折;上颌骨骨折;额骨骨折;视神经损伤;蝶骨骨折;脑挫伤;肺挫伤;硬膜下血肿;头皮血肿;肺部感染;慢性乙型病毒性肝炎	治愈	韩晓辉	杨顺海	林达	眶骨骨折切开复位内固定术;上颌骨骨折切开复位内固定术;颧骨骨折切开复位内固定术
233	C03眼科口腔	2024-05-16	2024-05-23	3504249	侯百儒	男	8Y	眶骨骨折	创伤性硬脑膜外血肿;蝶骨骨折;上颌窦骨折;鼻骨骨折;多处挫伤	好转	韩晓辉	杨顺海	林达	眶骨骨折切开复位内固定术
234	C03眼科口腔	2024-05-16	2024-05-24	3504412	缪丐珠	女	56Y	桡骨远端骨折	尺骨茎突骨折;孤立性肺结节;后天性肾囊肿	治愈	陈华	胡炜	胡炜	桡骨骨折切开复位钢板内固定术;手、指和腕关节的其他修补术
235	C03眼科口腔	2024-05-20	2024-05-25	3504736	邓浠锐	男	4Y	取除骨折内固定装置		其他	翁益民	翁益民	王特	肱骨内固定装置去除术
236	C03眼科口腔	2024-05-12	2024-05-25	3504821	李青飞	男	45Y	下颌骨骨折		治愈	聂鑫	徐兴侨	于健涛	下颌骨骨折切开复位内固定术
237	C03眼科口腔	2024-05-20	2024-05-25	3504863	周学民	男	41Y	眶骨骨折	颧弓骨折;脑脊液鼻漏;鼻骨骨折	未愈	韩晓辉	杨顺海	林达
238	C03眼科口腔	2024-05-18	2024-05-27	3505400	伍孝发	男	47Y	锁骨骨折	肋骨多处骨折	好转	孔建中	孔建中	陈墨川	锁骨骨折切开复位钢板内固定术;锁骨人工骨植骨术
239	C03眼科口腔	2024-04-22	2024-05-28	3505649	孙光焕	男	53Y	髌骨骨折	肺部感染;脂肪肝;肾结石;前列腺增生	治愈	翁益民	翁益民	王特	髌骨骨折切开复位张力带钢丝内固定术;创面封闭式负压引流术（VSD)
240	C03眼科口腔	2024-05-21	2024-05-28	3505670	谢国庆	男	48Y	腓骨骨折	双踝骨折;胫腓远端关节脱位;脂肪肝	好转	黄俊武	余贤斌	马亮亮	腓骨骨折切开复位钢板内固定术;踝关节骨折切开复位螺钉内固定术;踝脱位开放性复位术
241	C03眼科口腔	2024-05-27	2024-05-28	3505702	余顺福	男	66Y	玻璃体积血	前房积血;白内障;肋骨骨折	治愈	蔡剑秋	陈婕灵	张煜	后入路玻璃体切割术;前房冲洗术;玻璃体腔重水注射术，视网膜复位术;视网膜病损激光凝固术;视网膜前膜切除术
242	C03眼科口腔	2024-05-20	2024-05-29	3505904	潘箴克	男	21Y	股骨干骨折		好转	翁益民	翁益民	王特	股骨骨折闭合复位髓内针内固定术
243	C03眼科口腔	2024-05-23	2024-05-29	3505936	翁学耸	男	66Y	髌骨骨折	前列腺结石	治愈	周一飞	郑亦静	郑亦静	髌骨骨折切开复位张力带钢丝内固定术;膝关节的其他修补术
244	C03眼科口腔	2024-05-22	2024-05-29	3505966	何昭霞	女	38Y	取除骨折内固定装置		其他	聂鑫	聂鑫	于健涛	下颌骨内固定装置取出术
245	C03眼科口腔	2024-05-23	2024-05-29	3506009	李五	男	26Y	取除骨折内固定装置		其他	聂鑫	聂鑫	于健涛	胫骨内固定装置去除术;下颌骨内固定装置取出术
246	C03眼科口腔	2024-05-28	2024-05-29	3506103	龙元平	男	24Y	眶骨骨折	屈光不正	治愈	韩晓辉	杨顺海	宋广伟	眶骨骨折切开复位内固定术
247	C03眼科口腔	2024-05-28	2024-05-29	3506120	何伟	男	37Y	眶骨骨折	结膜下出血	治愈	韩晓辉	杨顺海	宋广伟	眶骨骨折切开复位内固定术;眼睑缝线去除
248	C03眼科口腔	2024-05-30	2024-05-30	3506478	吴俐影	女	7Y	下颌骨骨折		未愈	聂鑫	聂鑫	于健涛
249	C03眼科口腔	2024-05-26	2024-05-31	3506520	张一曼	女	62Y	取除骨折内固定装置	脂肪肝;老年性心脏瓣膜病;孤立性肺结节	其他	翁益民	翁益民	王特	肱骨内固定装置去除术;皮肤瘢痕切除术
250	C03眼科口腔	2024-05-27	2024-06-01	3506700	陈武杰	男	36Y	眶骨骨折	颧弓骨折;上颌骨骨折	治愈	韩晓辉	杨顺海	骆伊丽	眶骨骨折切开复位内固定术;颧骨骨折切开复位内固定术;上颌骨骨折切开复位内固定术
251	C03眼科口腔	2024-05-28	2024-06-01	3506713	吴钱锋	男	41Y	眶骨骨折	颧弓骨折;上颌骨骨折;颞骨骨折;面部软组织挫伤	治愈	韩晓辉	杨顺海	宋广伟	眶骨骨折切开复位内固定术;颧骨骨折切开复位内固定术;上颌骨骨折切开复位内固定术
252	C03眼科口腔	2024-05-24	2024-06-01	3506952	苏中适	男	31Y	肱骨干骨折	肝回声不均;胆囊息肉	治愈	陈华	胡炜	胡炜	肱骨骨折切开复位钢板内固定术
253	C03眼科口腔	2024-05-24	2024-06-02	3507196	徐丐琴	女	49Y	跗跖关节骨折脱位[Lisfranc骨折脱位]	跖骨骨折;跗骨骨折，其他的	治愈	陈华	胡炜	胡炜	跖骨骨折切开复位钢板内固定术;跖跗关节脱位切开复位术
254	C03眼科口腔	2024-05-30	2024-06-03	3507386	玄中宝	男	37Y	取除骨折内固定装置	肺大疱	其他	黄义星	黄义星	陈春慧	踝关节内固定装置去除术
255	C03眼科口腔	2024-05-23	2024-06-03	3507461	李德强	男	43Y	眶骨骨折	创伤性硬脑膜外血肿;颅腔积气;额骨骨折;脑挫伤;多处挫伤;肝囊肿	治愈	韩晓辉	杨顺海	林达	眶骨骨折切开复位内固定术;上颌骨骨折切开复位内固定术
256	C03眼科口腔	2024-06-02	2024-06-03	3507464	余唐银	男	29Y	取除骨折内固定装置		其他	韩晓辉	杨顺海	骆伊丽	去除面骨内固定装置
257	C03眼科口腔	2024-05-18	2024-06-04	3507711	黄爱华	女	55Y	胫骨平台骨折	面部裂伤;膝关节退行性病变;脂肪肝;多发性肝囊肿;后天性肾囊肿;肾结石	好转	翁益民	翁益民	蔡乐益	胫骨骨折切开复位钢板内固定术;膝关节的其他修补术;胫骨人工骨植骨术
258	C03眼科口腔	2024-06-04	2024-06-05	3508166	吴蜜	女	22Y	眶骨骨折		治愈	冯旺强	韩晓辉	骆伊丽	眶骨骨折切开复位内固定术
259	C03眼科口腔	2024-06-04	2024-06-06	3508247	李丽	女	46Y	眶骨骨折		治愈	韩晓辉	杨顺海	骆伊丽	眶骨骨折切开复位内固定术
260	C03眼科口腔	2024-05-29	2024-06-06	3508481	陈嘉婕	女	8Y	肱骨内上髁骨折		治愈	张敬东	朱瑞博	潘天龙	肱骨骨折切开复位钢针内固定术
261	C03眼科口腔	2024-06-05	2024-06-06	3508553	杨贵权	男	52Y	眼球穿通伤伴非磁性异物	白内障;眶骨骨折	治愈	董志章	杨顺海	林达	眼球破裂修补术;前房成形术;角膜切开异物去除术
262	C03眼科口腔	2024-05-26	2024-06-08	3509071	林加银	男	69Y	取除骨折内固定装置	膝关节退行性病变;肺肿物;肝囊肿;后天性肾囊肿;前列腺增生;前列腺结石;老年性心脏病	其他	翁益民	翁益民	蔡乐益	胫骨内固定装置去除术
263	C03眼科口腔	2024-06-04	2024-06-09	3509282	付铭燕	女	28Y	指骨近节骨折		好转	翁益民	翁益民	蔡乐益	指骨骨折闭合复位钢针内固定术
264	C03眼科口腔	2024-06-06	2024-06-09	3509402	蔡柳荫	女	61Y	指骨远节骨折	手指开放性伤口伴有指甲损害;小腿多处开放性伤口	治愈	李志杰	陈一衡	陈一衡	指骨骨折切开复位钢针内固定术;甲成形术
265	C03眼科口腔	2024-05-24	2024-06-09	3509412	吴爱珍	女	69Y	髌骨骨折	孤立性肺结节;肝囊肿;高血压	治愈	陈华	胡炜	胡炜	髌骨骨折切开复位张力带钢丝内固定术;膝关节的其他修补术;股四头肌成形术
266	C03眼科口腔	2024-06-09	2024-06-09	3509516	林驰闰	男	6Y	眶骨骨折	因病人家属原因未进行操作	未愈	韩晓辉	杨顺海	骆伊丽
267	C03眼科口腔	2024-05-30	2024-06-10	3509664	张碎兰	女	76Y	股骨远端骨折	骨质疏松;膝关节退行性病变;孤立性肺结节	治愈	黄义星	黄义星	陈春慧	股骨骨折切开复位钢板内固定术;股骨人工骨植骨术
268	C03眼科口腔	2024-05-30	2024-06-10	3509687	郑朝霞	男	55Y	肱骨近端骨折	肩关节脱位;环杓关节脱位;高血压;肺部感染;脂肪肝;胆囊息肉;后天性肾囊肿	治愈	黄义星	黄义星	陈春慧	肱骨骨折切开复位钢板内固定术;肩袖修补术;肩脱位闭合性复位术
269	C03眼科口腔	2024-06-09	2024-06-10	3509705	薛邦春	男	57Y	取除骨折内固定装置	无晶状体;白内障;高血压	其他	韩晓辉	杨顺海	宋广伟	上颌骨内固定装置取出术
270	C03眼科口腔	2024-05-29	2024-06-12	3510407	金三妹	女	85Y	股骨粗隆间骨折	创伤性蛛网膜下腔出血;多发性脑梗死;老年性脑萎缩;胸腔积液;胆囊结石;后天性肾囊肿;2型糖尿病;高血压	治愈	水小龙	水小龙	汪吉棋	股骨骨折闭合复位髓内针内固定术
271	C03眼科口腔	2024-06-08	2024-06-12	3510416	林可	女	6Y	取除骨折内固定装置		其他	张敬东	毛诚晃	潘天龙	桡骨内固定装置去除术
272	C03眼科口腔	2024-06-08	2024-06-12	3510421	周海腾	男	15Y	掌骨骨折		好转	翁益民	翁益民	蔡乐益	掌骨骨折闭合复位钢针内固定术;石膏绷带固定
273	C03眼科口腔	2024-06-10	2024-06-12	3510491	孙雷	男	42Y	眶骨骨折	眼睑裂伤	治愈	冯旺强	杨顺海	骆伊丽	眶骨骨折切开复位内固定术
274	C03眼科口腔	2024-06-08	2024-06-13	3510786	吴月洁	女	51Y	踝关节骨折	踝关节脱位;泌尿道感染	好转	黄俊武	余贤斌	马亮亮	踝关节骨折切开复位钢板内固定术;踝脱位开放性复位术;踝关节修补术
275	C03眼科口腔	2024-06-06	2024-06-13	3510989	金玉兰	女	86Y	肱骨外科颈骨折	肺炎;主动脉钙化;先天性肋骨畸形;肝囊肿;后天性肾囊肿;淤积性皮炎;心房扩大;二尖瓣及主动脉瓣狭窄伴关闭不全;包裹性心包积液;下肢静脉曲张	治愈	洪建军	张秀孟	张秀孟	人工肱骨头置换术;肩袖修补术;肩关节滑膜切除术
276	C03眼科口腔	2024-06-07	2024-06-15	3511309	张健	男	33Y	取除骨折内固定装置	脂肪肝	其他	翁益民	翁益民	蔡乐益	跟骨内固定物取出术;椎骨内固定物取出术
277	C03眼科口腔	2024-06-07	2024-06-15	3511312	吴先忠	男	55Y	取除骨折内固定装置	乙型病毒性肝炎;脂肪肝;肾结石;前列腺囊肿	其他	翁益民	翁益民	蔡乐益	跟骨内固定物取出术;椎骨内固定物取出术
278	C03眼科口腔	2024-06-06	2024-06-15	3511322	陈永妹	女	74Y	股骨颈骨折	高血压;动脉粥样硬化;冠状动脉肌桥;单纯性肾囊肿	治愈	余洋	余洋	徐宏威	人工股骨头置换术;髋轴面，陶瓷与聚乙烯;髋关节滑膜切除术
279	C03眼科口腔	2024-06-10	2024-06-16	3511640	汪秀容	女	48Y	外踝骨折	肺肿物;贫血	治愈	王鉴顺	王鉴顺	白炳力	踝关节骨折切开复位钢板内固定术;踝关节修补术
280	C03眼科口腔	2024-06-05	2024-06-16	3511702	蔡国群	男	38Y	取除骨折内固定装置		其他	聂鑫	聂鑫	潘丽	上颌骨内固定装置取出术
281	C03眼科口腔	2024-06-11	2024-06-17	3512186	曹益静	男	41Y	三踝骨折	脂肪肝;前列腺结石	好转	翁益民	翁益民	蔡乐益	踝关节骨折切开复位钢板内固定术;踝关节修补术;腓骨人工骨植骨术
282	C03眼科口腔	2024-06-16	2024-06-17	3512199	陈庆弟	男	48Y	眶骨骨折	糖尿病	治愈	韩晓辉	杨顺海	林达	眶骨骨折切开复位内固定术
283	C03眼科口腔	2024-06-18	2024-06-19	3512938	傅学其	男	56Y	眶骨骨折	眼睑裂伤	治愈	韩晓辉	杨顺海	骆伊丽	眶骨骨折切开复位内固定术
284	C03眼科口腔	2024-06-13	2024-06-20	3513315	陈松亮	男	48Y	取除骨折内固定装置	肺肿物;肝错构瘤;胆囊息肉;后天性肾囊肿;前列腺增生;前列腺结石;慢性胃炎;胃息肉	其他	翁益民	翁益民	蔡乐益	锁骨内固定装置去除术
285	C03眼科口腔	2024-06-15	2024-06-22	3513505	金国俊	男	49Y	取除骨折内固定装置	脂肪肝;肝钙化灶;后天性肾囊肿;肾结石	其他	翁益民	翁益民	蔡乐益	股骨内固定装置去除术
286	C03眼科口腔	2024-06-13	2024-06-22	3513513	周金丹	女	47Y	取除骨折内固定装置	肝囊肿	其他	翁益民	翁益民	蔡乐益	胫骨内固定装置去除术;锁骨内固定装置去除术
287	C03眼科口腔	2024-06-15	2024-06-22	3513737	钟字萍	男	33Y	肱骨髁上骨折	上臂擦伤;胸前壁浅表损伤;脂肪肝;肾结石;前列腺结石	好转	黄俊武	余贤斌	马亮亮	肱骨骨折切开复位钢板内固定术;肘关节成形术
288	C03眼科口腔	2024-06-14	2024-06-23	3513967	卓琴芬	女	64Y	内踝骨折	2型糖尿病;甲状腺术后;二尖瓣及主动脉瓣关闭不全;心功能不全;脂肪肝;胆囊结石	治愈	水小龙	水小龙	汪吉棋	踝关节骨折切开复位钢板内固定术;踝关节修补术
289	C03眼科口腔	2024-06-15	2024-06-23	3513984	顾云祥	男	42Y	髌骨骨折	髌韧带损伤;趾骨骨折;脂肪肝	治愈	水小龙	水小龙	汪吉棋	髌骨骨折切开复位张力带钢丝内固定术;髌韧带缝合术
290	C03眼科口腔	2024-06-20	2024-06-25	3514815	李萍	女	51Y	取除骨折内固定装置	高血压;癫痫;心脏病	其他	聂鑫	聂鑫	潘丽	下颌骨内固定装置取出术
291	C03眼科口腔	2024-06-13	2024-06-26	3515031	方文祥	男	41Y	视网膜损伤	视网膜色素变性;白内障;眶骨骨折;颧弓骨折;眼睑裂伤;尺骨和桡骨下端均骨折;三根肋骨骨折不伴第一肋骨骨折;耳损伤;创伤性硬脑膜外血肿;颅腔积气;多处挫伤	治愈	冯旺强	杨顺海	林达	桡骨骨折切开复位钢板内固定术;桡骨人工骨植骨术;手、指和腕关节的其他修补术;后入路玻璃体切割术;白内障超声乳化抽吸术;玻璃体气液交换，视网膜复位术;视网膜病损激光凝固术;玻璃体硅油填充术;颧骨骨折切开复位内固定术;上颌骨骨折切开复位内固定术
292	C03眼科口腔	2024-06-16	2024-06-26	3515079	傅雪林	男	51Y	下颌骨骨折	牙槽骨骨折;颧弓骨折	治愈	聂鑫	聂鑫	于健涛	下颌骨骨折切开复位内固定术
293	C03眼科口腔	2024-06-18	2024-06-29	3515747	吕政委	男	45Y	跟骨骨折	肾结石;前列腺增生	治愈	余洋	余洋	徐宏威	跟骨骨折切开复位钢板内固定术;踝关节修补术;跟骨人工骨植骨术
294	C03眼科口腔	2024-06-18	2024-06-29	3515756	周翠美	女	55Y	跖骨骨折	低钾血症;开放性足损伤;高血压	治愈	余洋	余洋	徐宏威	跖骨骨折切开复位钢板内固定术;跖骨骨折闭合复位钢针内固定术;跖骨植骨术
295	C03眼科口腔	2024-06-22	2024-06-29	3515858	干爱芳	女	60Y	急性闭角型青光眼	腰椎骨折L1;白内障;特发性(原发性)高血压;2型糖尿病	好转	蔡剑秋	夏哲人	张煜	滤帘切除术[小梁切除术];腰椎骨折球囊扩张成形术
296	C03眼科口腔	2024-06-20	2024-06-29	3515926	余成周	男	41Y	尺骨和桡骨下端均骨折	肝钙化灶;肾结石;前列腺结石	治愈	赵友明	赵友明	柯陈荣	桡骨骨折切开复位钢板内固定术;手、指和腕关节的其他修补术;石膏绷带固定
297	C03眼科口腔	2024-06-20	2024-06-29	3515928	李罕花	女	48Y	髌骨骨折	膝关节积液;脂肪肝;肝钙化灶;后天性肾囊肿	治愈	赵友明	赵友明	柯陈荣	髌骨骨折切开复位张力带钢丝内固定术;膝关节的其他修补术;石膏绷带固定
298	C03眼科口腔	2024-06-13	2024-06-29	3515935	陈珠妹	女	57Y	肱骨髁上骨折	在上臂水平的桡神经损伤;足部擦伤;脂肪肝;老年性心脏瓣膜病	治愈	孙辽军	孙辽军	余炜	肱骨骨折切开复位钢板内固定术;肘关节成形术;肱骨人工骨植骨术;桡神经探查术
299	C03眼科口腔	2024-06-05	2024-06-30	3516031	郑玉兰	女	62Y	开放性胫骨骨干骨折	锁骨骨折;脑挫伤;肺部感染;甲状腺结节	治愈	孙辽军	孙辽军	余炜	胫骨骨折切开复位钢针内固定术;胫骨外固定术;应用单平面外固定架;皮肤和皮下坏死组织切除清创术;创面封闭式负压引流术（VSD);皮肤和皮下坏死组织切除清创术;创面封闭式负压引流术（VSD);中厚皮片移植术
300	C03眼科口腔	2024-06-30	2024-07-01	3516395	罗皓诚	男	4Y	眶骨骨折		治愈	冯旺强	杨顺海	骆伊丽	眶骨骨折切开复位内固定术
301	C03眼科口腔	2024-06-19	2024-07-02	3516733	徐小波	男	30Y	眼撕裂伤不伴有眼内组织脱出或缺失	玻璃体积血;视网膜脱离;脉络膜脱离;创伤性晶状体脱位;眼睑裂伤;结合膜损伤和角膜擦伤，未提及异物;眶骨骨折	治愈	冯旺强	杨顺海	林达	眼球破裂修补术;结膜裂伤修补术;眼睑裂伤缝合术;眦成形术;经后路白内障切割吸出术;后入路玻璃体切割术;前房冲洗术
302	C03眼科口腔	2024-05-14	2024-07-03	3514785	陈柏崴	男	3Y	眶骨骨折	外斜视;脑挫伤;创伤性蛛网膜下腔出血;颅骨多发性骨折;肺挫伤;寰枢椎半脱位;化脓性脑膜炎;硬膜外血肿;硬脑膜下积液;肝损害;粒细胞缺乏	治愈	韩晓辉	杨顺海	林达	眶骨骨折切开复位内固定术;股静脉穿刺置管术;肢体动脉压测量;腰椎穿刺术;腰椎穿刺术;腰椎穿刺术
303	C03眼科口腔	2024-06-29	2024-07-05	3517808	张绍卫	男	57Y	股骨干骨折	高血压;脂肪肝;肝囊肿;胆囊息肉;后天性肾囊肿;前列腺结石	治愈	孙辽军	孙辽军	翁摄稷	股骨骨折切开复位钢板内固定术
304	C03眼科口腔	2024-06-26	2024-07-06	3518016	瞿祥路	女	30Y	下颌骨骨折		治愈	聂鑫	聂鑫	于健涛	下颌骨骨折切开复位内固定术
305	C03眼科口腔	2024-06-26	2024-07-06	3518144	杨正军	男	56Y	下颌骨骨折		治愈	聂鑫	肖进	潘丽	下颌骨骨折切开复位内固定术
306	C03眼科口腔	2024-06-25	2024-07-06	3518240	胡理光	男	47Y	眼球破裂伤	眶内异物;眼睑裂伤;眶骨骨折;泪小管断裂;鼻骨骨折	治愈	韩晓辉	杨顺海	宋广伟	眼球破裂修补术;眼睑全层及睑缘裂伤修补术;眶骨骨折切开复位内固定术;泪小管吻合术;鼻泪管插管术;内眦成形术
307	C03眼科口腔	2024-06-25	2024-07-07	3518378	厉志坚	男	49Y	跖骨骨折	肺气肿合并肺大泡;脂肪肝;肺肿物	治愈	孙辽军	孙辽军	翁摄稷	跖骨骨折切开复位钢板内固定术;跖骨植骨术
308	C03眼科口腔	2024-07-02	2024-07-07	3518513	蔡锦安	男	45Y	股骨颈骨折	肺恶性肿瘤;胸腔积液;陈旧性肺结核;胆囊息肉;前列腺增生	未愈	黄义星	黄义星	陈春慧
309	C03眼科口腔	2024-07-01	2024-07-08	3518125	吴和军	男	42Y	眶骨骨折	上颌骨骨折	治愈	韩晓辉	杨顺海	林达	眶骨骨折切开复位内固定术;上颌骨骨折切开复位内固定术
310	C03眼科口腔	2024-07-07	2024-07-08	3518951	黄张玉	女	43Y	取除骨折内固定装置		其他	韩晓辉	杨顺海	林达	去除面骨内固定装置
311	C03眼科口腔	2024-07-01	2024-07-08	3519108	苏连斌	男	49Y	眶骨骨折	颧弓骨折;上颌骨骨折;视神经损伤;肩锁关节脱位	治愈	韩晓辉	杨顺海	林达	眶骨骨折切开复位内固定术;颧骨骨折切开复位内固定术;上颌骨骨折切开复位内固定术;肩锁关节脱位切开复位内固定术
312	C03眼科口腔	2024-06-28	2024-07-09	3519326	李庆明	男	70Y	胫骨上端骨折	小腿其他部位的开放性伤口;头皮裂伤;支气管扩张伴感染;肺大疱;后天性肾囊肿;前列腺结石;老年性心脏病;老年性脑变性，不可归类在他处者	治愈	孙辽军	孙辽军	翁摄稷	胫骨骨折切开复位钢板内固定术;胫骨人工骨植骨术
313	C03眼科口腔	2024-07-03	2024-07-09	3519396	毛雪芬	女	39Y	取除骨折内固定装置		其他	聂鑫	肖进	于健涛	去除面骨内固定装置
314	C03眼科口腔	2024-07-05	2024-07-10	3519738	陈连珍	女	54Y	髌骨骨折	肺肿物;胆囊结石;脂肪肝	治愈	黄义星	黄义星	陈春慧	髌骨骨折切开复位张力带钢丝内固定术
315	C03眼科口腔	2024-07-01	2024-07-11	3520249	曾云洋	男	28Y	颧骨和上颌骨骨折	眶骨骨折	治愈	聂鑫	聂鑫	于健涛	上颌骨骨折切开复位内固定术;颧骨骨折切开复位内固定术;眶骨骨折切开复位内固定术
316	C03眼科口腔	2024-06-13	2024-07-13	3520717	熊平芬	女	40Y	创伤性硬脑膜下血肿	创伤性硬脑膜外血肿;脑挫伤;颞骨骨折;创伤性颅内积气;颅底骨折;锁骨骨折;面部擦伤	治愈	王鉴顺	王鉴顺	白炳力	锁骨骨折切开复位钢板内固定术;锁骨人工骨植骨术
317	C03眼科口腔	2024-07-14	2024-07-14	3521349	邓美胜	男	34Y	取除骨折内固定装置		其他	韩晓辉	杨顺海	林达	去除面骨内固定装置
318	C03眼科口腔	2024-06-27	2024-07-15	3521751	侯家益	男	8Y	胫腓骨下端骨折		治愈	翁益民	翁益民	蔡乐益	胫骨骨折切开复位钢针内固定术;石膏绷带固定
319	C03眼科口腔	2024-07-06	2024-07-17	3522289	吴兴魁	男	50Y	眼球破裂伤	玻璃体积血;创伤性前房积血;无晶状体;视网膜脱离;脉络膜脱离;眼睑裂伤;眶骨骨折	治愈	郑穗联	夏哲人	张煜	眼球破裂修补术;眼睑裂伤缝合术;前房穿刺术;后入路玻璃体切割术
320	C03眼科口腔	2024-07-13	2024-07-17	3522351	董彩英	女	48Y	取除骨折内固定装置		其他	黄义星	黄义星	陈春慧	肱骨内固定装置去除术;锁骨内固定装置去除术;皮肤瘢痕切除术
321	C03眼科口腔	2024-07-10	2024-07-17	3522427	陈婉怡	女	15Y	取除骨折内固定装置		其他	聂鑫	聂鑫	潘丽	下颌骨内固定装置取出术
322	C03眼科口腔	2024-07-16	2024-07-17	3522540	周祥	女	23Y	眶骨骨折		治愈	冯旺强	杨顺海	骆伊丽	眶骨骨折切开复位内固定术
323	C03眼科口腔	2024-07-11	2024-07-18	3522748	黄兆根	男	36Y	锁骨骨折		好转	翁益民	翁益民	蔡乐益	锁骨骨折切开复位钢板内固定术
324	C03眼科口腔	2024-07-06	2024-07-21	3522372	朱兰芬	女	57Y	脓毒血症	肺部感染;肝功能检查的异常结果;两根肋骨骨折不伴第一肋骨骨折;孤立性肺结节;多发性肝囊肿;胸腔积液	好转	陈龙	陈龙	应晓洲
325	C03眼科口腔	2024-07-03	2024-07-21	3523865	周光态	男	44Y	下颌骨骨折		治愈	聂鑫	肖进	于健涛	下颌骨骨折切开复位内固定术
326	C03眼科口腔	2024-07-18	2024-07-22	3524152	彭成奥	男	12Y	鹰嘴骨折		治愈	水小龙	水小龙	汪吉棋	尺骨骨折切开复位钢针内固定术;肘关节成形术;尺骨人工骨植骨术
327	C03眼科口腔	2024-07-18	2024-07-23	3524518	卢珂珂	女	22Y	尺骨鹰嘴骨折	肘开放性伤口	治愈	水小龙	水小龙	汪吉棋	尺骨骨折切开复位钢板内固定术;肘关节的其他修补术;尺骨人工骨植骨术
328	C03眼科口腔	2024-07-18	2024-07-23	3524553	陈红海	男	50Y	桡骨干骨折	脂肪肝;后天性肾囊肿;前列腺结石	治愈	水小龙	水小龙	汪吉棋	桡骨骨折切开复位钢板内固定术;桡骨人工骨植骨术
329	C03眼科口腔	2024-07-20	2024-07-25	3525473	雷秋华	女	54Y	眶骨骨折	颧弓骨折;上颌骨骨折;掌骨骨折	治愈	冯旺强	杨顺海	宋广伟	眶骨骨折切开复位内固定术;上颌骨骨折切开复位内固定术;颧骨骨折切开复位内固定术
330	C03眼科口腔	2024-07-23	2024-07-27	3526042	陈应冯	男	42Y	眶骨骨折	颧弓骨折;上颌骨骨折;颞骨骨折	治愈	冯旺强	杨顺海	林达	眶骨骨折切开复位内固定术;上颌骨骨折切开复位内固定术;颧骨骨折切开复位内固定术
331	C03眼科口腔	2024-07-17	2024-07-28	3526344	徐宗玉	女	62Y	股骨颈骨折	难治性抑郁症;肾结石	好转	黄俊武	余贤斌	马亮亮	全髋关节置换;髋轴面，陶瓷与陶瓷;髋关节滑膜切除术
332	C03眼科口腔	2024-07-25	2024-07-28	3526590	郑美花	女	55Y	泪小管裂伤	眶内异物;眼睑裂伤;尺骨鹰嘴骨折	治愈	韩晓辉	杨顺海	林达	尺骨骨折切开复位钢针内固定术;肘关节的其他修补术;泪小管吻合术;鼻泪管探通术;眶内表浅异物去除;内眦成形术
333	C03眼科口腔	2024-07-23	2024-07-29	3526804	刘元勇	男	47Y	颧弓骨折	面部挫伤	治愈	麻益可	麻益可	曹玉慧	颧骨骨折切开复位内固定术;皮肤和皮下组织切开引流术
334	C03眼科口腔	2024-04-22	2024-07-29	3526870	赵宗富	男	41Y	肩关节处创伤性切断	失血性休克;胸骨前区开放性损伤;开放性气胸;腰背部皮肤撕脱伤;口腔开放性损伤;颧骨骨折;开放性腮腺管断裂;耳廓开放性损伤;开放性外耳道损伤;面神经断裂;肋骨多处骨折;创伤性胸腔积液;肾结石	好转	聂鑫	聂鑫	潘丽	肩关节离断术;创面封闭式负压引流术（VSD);胸壁裂伤缝合术;胸腔闭式引流术;外耳道成形术;外耳裂伤缝合术;腮腺管吻合术;皮肤和皮下组织非切除性清创;皮肤和皮下坏死组织切除清创术;创面封闭式负压引流术（VSD);中厚皮片移植术;皮肤和皮下坏死组织切除清创术;腮腺切除术
335	C03眼科口腔	2024-07-13	2024-07-29	3526871	王梓恺	男	12Y	眼球穿通伤	创伤性前房积血;眼睑裂伤;眶骨骨折;无晶状体;屈光不正;鼻咽血管瘤;鼻炎	治愈	郑穗联	夏哲人	张煜	眼球破裂修补术;前房成形术;眼外肌损伤修补术;眼睑裂伤缝合术;眼眶缺损修补术;白内障囊外摘除术;后入路玻璃体切割术;视网膜病损激光凝固术
336	C03眼科口腔	2024-07-28	2024-07-29	3526947	叶蒙蒙	女	32Y	取除骨折内固定装置		其他	韩晓辉	杨顺海	骆伊丽	去除面骨内固定装置
337	C03眼科口腔	2024-07-23	2024-07-30	3527042	吴建忠	男	44Y	锁骨骨折	肾结石	好转	翁益民	翁益民	蔡乐益	锁骨骨折切开复位钢板内固定术
338	C03眼科口腔	2024-07-23	2024-07-31	3527496	黄梦瑶	女	22Y	胫骨平台骨折	膝关节积液	好转	翁益民	翁益民	蔡乐益	胫骨骨折切开复位钢板内固定术;膝关节的其他修补术;胫骨人工骨植骨术
339	C03眼科口腔	2024-07-24	2024-08-01	3528020	金国城	男	49Y	眶骨骨折	脑挫伤;脑震荡;头皮裂伤;多处挫伤;肺挫伤;脂肪肝;后天性肾囊肿;肾结石;尺骨茎突骨折	治愈	韩晓辉	杨顺海	林达	眶骨骨折切开复位内固定术
340	C03眼科口腔	2024-07-28	2024-08-01	3528121	诸葛上英	女	70Y	眼球挫伤	泪管损伤;硅油注入术后;眼睑裂伤;眶骨骨折;人工晶体植入状态;腕和手的损伤	好转	郑穗联	夏哲人	张煜
341	C03眼科口腔	2024-07-22	2024-08-03	3528435	王声航	男	16Y	胫骨干骨折伴腓骨骨折		好转	翁益民	翁益民	蔡乐益	胫骨骨折切开复位钢板内固定术;胫骨人工骨植骨术
342	C03眼科口腔	2024-07-20	2024-08-03	3528568	潘巧慧	女	12Y	眶骨骨折	眶内异物;面部软组织挫伤;多处挫伤;肾结石	治愈	韩晓辉	杨顺海	林达	眶骨骨折切开复位内固定术;眶切开异物取出术
343	C03眼科口腔	2024-07-24	2024-08-05	3529206	万佳轩	男	8Y	下颌骨骨折		治愈	聂鑫	聂鑫	潘丽	下颌骨骨折切开复位内固定术
344	C03眼科口腔	2024-07-23	2024-08-05	3529258	陈文南	男	52Y	髌骨骨折	肝钙化灶;脂肪肝;冠状动脉粥样硬化	治愈	孔建中	陈墨川	陈墨川	髌骨骨折切开复位张力带钢丝内固定术
345	C03眼科口腔	2024-07-24	2024-08-05	3529265	柯学文	男	51Y	眼球挫伤	玻璃体积血;视网膜脱离伴视网膜断裂;黄斑裂孔;外伤性白内障;创伤性晶状体脱位;结合膜损伤和角膜擦伤，未提及异物;眼睑裂伤;泪小管断裂;眶骨骨折	治愈	冯旺强	杨顺海	林达	结膜裂伤修补术;内眦成形术;后入路玻璃体切割术伴替代物注入;白内障超声乳化抽吸术;视网膜脱离激光治疗术;用激光光凝固法的视网膜裂伤修补术;玻璃体气液交换，视网膜复位术;结膜裂伤修补术
346	C03眼科口腔	2024-08-01	2024-08-08	3530602	谢何良	男	67Y	视神经损伤	眶内血肿;眶骨骨折;眼睑裂伤;白内障;创伤性蛛网膜下腔出血;头皮血肿;甲状腺结节;胆囊切除术后状态	好转	董志章	杨顺海	林达
347	C03眼科口腔	2024-08-06	2024-08-10	3531069	陈品妤	女	11Y	取除骨折内固定装置		其他	翁益民	翁益民	蔡乐益	锁骨内固定装置去除术
348	C03眼科口腔	2024-08-06	2024-08-10	3531086	昌招	男	38Y	取除骨折内固定装置	脂肪肝	其他	翁益民	翁益民	蔡乐益	股骨内固定装置去除术
349	C03眼科口腔	2024-07-30	2024-08-10	3531100	王爱芬	女	70Y	踝关节骨折	脂肪肝;下肢动脉粥样硬化;心功能不全	好转	翁益民	翁益民	蔡乐益	踝关节骨折切开复位钢板内固定术;踝关节修补术;踝融合术;腓骨人工骨植骨术
350	C03眼科口腔	2024-08-01	2024-08-10	3531232	孔帅	男	18Y	眶骨骨折	颧弓骨折;上颌骨骨折;结膜下出血;上睑下垂;面神经损伤;多处挫伤	治愈	韩晓辉	杨顺海	骆伊丽	眶骨骨折切开复位内固定术;颧骨骨折切开复位内固定术;上颌骨骨折切开复位内固定术
351	C03眼科口腔	2024-08-07	2024-08-10	3531258	彭根菊	女	60Y	泪小管裂伤	眼睑裂伤;胫骨平台骨折	治愈	冯旺强	杨顺海	宋广伟	眼睑裂伤缝合术;泪小管吻合术;鼻泪管探通术;鼻泪管插管术;结膜囊成形术
352	C03眼科口腔	2024-08-11	2024-08-12	3532054	林雨宣	女	11Y	取除骨折内固定装置		其他	韩晓辉	杨顺海	骆伊丽	去除面骨内固定装置
353	C03眼科口腔	2024-08-11	2024-08-12	3532118	甘茗悦	女	3Y	取除骨折内固定装置		其他	韩晓辉	杨顺海	林达	去除面骨内固定装置
354	C03眼科口腔	2024-08-06	2024-08-13	3532440	黄美珍	女	69Y	髌骨骨折	特发性(原发性)高血压;支气管扩张(症);肺大疱	治愈	孔建中	陈墨川	陈墨川	髌骨骨折切开复位张力带钢丝内固定术
355	C03眼科口腔	2024-08-01	2024-08-14	3532806	谢爱兰	女	58Y	2型糖尿病性视网膜病变	2型糖尿病;2型糖尿病性肾病;2型糖尿病足病;白内障;陈旧性足舟骨骨折;高脂血症;骨质疏松;陈旧性肺结核;主动脉弓钙化	好转	郑穗联	陈婕灵	张煜	后入路玻璃体切割术伴替代物注入;白内障超声乳化抽吸术;视网膜前膜切除术;视网膜脱离激光治疗术;玻璃体气液交换，视网膜复位术
356	C03眼科口腔	2024-07-31	2024-08-17	3533825	吴圣发	男	35Y	双踝骨折	结膜撕裂伤;眼睑裂伤;泪小管裂伤;乙型肝炎小三阳	治愈	韩晓辉	杨顺海	林达	眼睑全层裂伤修补术;结膜囊成形术;踝关节骨折切开复位钢板内固定术
357	C03眼科口腔	2024-08-07	2024-08-17	3533894	鲍月利	男	37Y	眶骨骨折	第一掌骨基底骨折;腕掌关节脱位;创伤性硬脑膜下血肿;创伤性硬脑膜外血肿;创伤性蛛网膜下腔血肿;脑挫伤;额骨骨折;鼻骨骨折;颧弓骨折;两根肋骨骨折不伴第一肋骨骨折;头皮血肿;多处挫伤	治愈	韩晓辉	杨顺海	宋广伟	眶骨骨折切开复位内固定术;掌骨骨折切开复位钢针内固定术;腕掌关节脱位切开复位术
358	C03眼科口腔	2024-08-12	2024-08-19	3534798	范方德	男	57Y	泪小管裂伤	眼睑裂伤;眶骨骨折;白内障	治愈	韩晓辉	杨顺海	林达	泪小管吻合术;鼻泪管探通术;眼睑裂伤缝合术
359	C03眼科口腔	2024-08-18	2024-08-19	3534894	韦朝国	男	49Y	眶骨骨折	上颌骨骨折;眼睑裂伤	治愈	韩晓辉	杨顺海	林达	眶骨骨折切开复位内固定术;上颌骨骨折切开复位内固定术
360	C03眼科口腔	2024-08-04	2024-08-19	3534917	金振杰	男	31Y	下颌骨骨折	颞下颌关节脱位;癫痫;精神障碍	治愈	聂鑫	肖进	潘丽	下颌骨骨折切开复位内固定术
361	C03眼科口腔	2024-08-14	2024-08-20	3535179	王东阳	男	9Y	取除骨折内固定装置		其他	聂鑫	肖进	潘丽	下颌骨内固定装置取出术
362	C03眼科口腔	2024-08-12	2024-08-20	3535190	朱红军	男	34Y	下颌骨骨折		治愈	聂鑫	聂鑫	潘丽	下颌骨骨折切开复位内固定术
363	C03眼科口腔	2024-08-15	2024-08-21	3535663	邹国深	男	54Y	股骨粗隆间骨折	孤立性肺结节;肝囊肿	治愈	水小龙	水小龙	汪吉棋	股骨骨折闭合复位髓内针内固定术
364	C03眼科口腔	2024-08-18	2024-08-21	3535783	蔡万增	男	35Y	颧弓骨折		治愈	麻益可	麻益可	黄信隆	颧骨骨折切开复位内固定术
365	C03眼科口腔	2024-08-17	2024-08-21	3535801	周兰花	女	58Y	泪小管裂伤	眼睑裂伤;结膜下出血;眶骨骨折;颧弓骨折;额骨骨折;白内障;鼻骨骨折;肩胛骨骨折;肋骨骨折;跟骨骨折;面部挫伤	治愈	王鉴顺	王鉴顺	白炳力	泪小管吻合术;鼻泪管插管术;眼睑裂伤缝合术
366	C03眼科口腔	2024-08-17	2024-08-21	3535849	黄良克	男	45Y	眶骨骨折	上颌骨骨折;视神经损伤;颧弓骨折	治愈	董志章	杨顺海	林达	眶骨骨折切开复位内固定术;上颌骨骨折切开复位内固定术
367	C03眼科口腔	2024-08-18	2024-08-25	3537146	汪国英	女	34Y	眶骨骨折		治愈	冯旺强	杨顺海	宋广伟	眶骨骨折切开复位内固定术
368	C03眼科口腔	2024-08-25	2024-08-26	3537632	夏元权	男	51Y	取除骨折内固定装置		其他	韩晓辉	杨顺海	林达	去除面骨内固定装置
369	C03眼科口腔	2024-08-21	2024-08-27	3538062	杨学向	男	50Y	颧弓骨折		治愈	聂鑫	肖进	潘丽	颧骨骨折切开复位内固定术
370	C03眼科口腔	2024-08-11	2024-08-27	3538067	邱阿珠	女	64Y	眼球破裂伤	眼睑裂伤;泪小管裂伤;前房积血;玻璃体积血;继发性青光眼;无晶状体;眶骨骨折;白内障;风湿病	治愈	冯旺强	杨顺海	骆伊丽	眼球破裂修补术;泪小管吻合术;鼻泪管插管术;眼睑裂伤缝合术;前房冲洗术;前入路玻璃体切割术;后入路玻璃体切割术
371	C03眼科口腔	2024-08-17	2024-08-28	3538598	李海燕	女	48Y	视网膜损伤	视网膜脱离;眼球破裂伤;眼内出血;眶骨骨折;肱骨近端多发性骨折;肩袖损伤;不完全性右束支传导阻滞	治愈	蔡剑秋	夏哲人	杨晖	后入路玻璃体切割术;肱骨骨折切开复位钢板内固定术;肩袖修补术;肱骨人工骨植骨术
372	C03眼科口腔	2024-08-24	2024-08-31	3539442	陈振龙	男	29Y	眶骨骨折	颧弓骨折;上颌骨骨折;眼球挫伤;结膜下出血;肩锁关节脱位;多处挫伤	治愈	韩晓辉	杨顺海	林达	眶骨骨折切开复位内固定术;颧骨骨折切开复位内固定术;上颌骨骨折切开复位内固定术
373	C03眼科口腔	2024-08-24	2024-08-31	3539471	李贵姚	女	12Y	下颌骨骨折	颞下颌关节脱位;癫痫	治愈	聂鑫	肖进	于健涛	下颌骨骨折切开复位内固定术;颞下颌脱位开放性复位术
374	C03眼科口腔	2024-08-26	2024-08-31	3539585	周利妹	女	79Y	胸椎骨折	特发性(原发性)高血压;2型糖尿病;腰椎退行性病变;腰椎间盘突出;骨质疏松;肝囊肿;肝钙化灶;后天性肾囊肿;心功能不全	好转	翁益民	翁益民	蔡乐益	胸椎骨折球囊扩张成形术
375	C03眼科口腔	2024-09-01	2024-09-01	3540084	李成钦	男	52Y	白内障	慢性肾小球肾炎;痛风;高血压;骨折术后恢复期	治愈	冯旺强	杨顺海	林达	白内障超声乳化抽吸术;白内障摘除伴人工晶体一期置入术;前入路玻璃体切除术
376	C03眼科口腔	2024-08-05	2024-09-03	3540567	石金浩	男	33Y	眼撕裂伤和破裂伴有眼内组织脱出或缺失	眼睑和眼周区开放性伤口;泪小管裂伤;外伤性白内障;创伤性前房积血;玻璃体积血;无晶状体;眼睑烧伤;眶骨骨折;视神经损伤	治愈	冯旺强	杨顺海	林达	眼球破裂修补术;结膜切开异物取出术;结膜囊成形术;眼睑裂伤缝合术;前房成形术;白内障摘除伴人工晶体一期置入术;白内障超声乳化抽吸术;前房冲洗术;前入路玻璃体切割术
377	C03眼科口腔	2024-08-28	2024-09-03	3540646	龚建兰	女	39Y	颧骨骨折	轻度贫血	治愈	聂鑫	聂鑫	崔磊华	颧骨骨折切开复位内固定术
378	C03眼科口腔	2024-08-14	2024-09-03	3540710	嵇芷萱	女	13Y	下颌骨骨折	颧弓骨折;股骨干骨折;尺骨鹰嘴骨折	治愈	聂鑫	聂鑫	崔磊华	下颌骨骨折切开复位内固定术;股骨骨折闭合复位螺钉内固定术;尺骨骨折切开复位钢针内固定术
379	C03眼科口腔	2024-08-26	2024-09-04	3540971	谢开喜	男	58Y	跟骨骨折	肺肿物;腰椎退行性病变;腰椎间盘突出	好转	翁益民	翁益民	王特	跟骨骨折闭合复位钢针内固定术
380	C03眼科口腔	2024-08-30	2024-09-04	3541145	林三妹	女	75Y	肱骨近端骨折	骨质疏松;2型糖尿病;原发性双侧膝关节病;特发性(原发性)高血压;偏瘫	好转	黄俊武	胡炜	胡炜
381	C03眼科口腔	2024-08-26	2024-09-05	3541310	刘科敏	男	36Y	髌骨骨折	肝囊肿;胆囊息肉;后天性肾囊肿	好转	翁益民	翁益民	王特	髌骨骨折切开复位张力带钢丝内固定术;膝关节的其他修补术
382	C03眼科口腔	2024-09-05	2024-09-05	3541577	张骄	男	38Y	颧骨骨折		未愈	聂鑫	聂鑫	崔磊华
383	C03眼科口腔	2024-09-03	2024-09-07	3541860	陈细瑜	男	45Y	颧弓骨折		治愈	聂鑫	聂鑫	崔磊华	颧骨骨折切开复位内固定术
384	C03眼科口腔	2024-09-03	2024-09-07	3542023	朱慧	男	42Y	取除骨折内固定装置	肝囊肿;前列腺结石;肺肿物	其他	翁益民	翁益民	王特	踝关节内固定装置去除术
385	C03眼科口腔	2024-08-31	2024-09-08	3542561	唐照波	男	43Y	下颌骨骨折	创伤性牙齿脱落	治愈	麻益可	麻益可	胡海锋	下颌骨骨折切开复位内固定术;拔除其他牙
386	C03眼科口腔	2024-09-08	2024-09-09	3542907	袁其鹏	男	30Y	眶骨骨折		治愈	韩晓辉	杨顺海	林达	眶骨骨折切开复位内固定术
387	C03眼科口腔	2024-09-08	2024-09-09	3542917	汪志建	男	29Y	取除骨折内固定装置	屈光不正	其他	韩晓辉	杨顺海	林达	去除面骨内固定装置
388	C03眼科口腔	2024-09-08	2024-09-09	3542926	姚红	女	51Y	眶骨骨折		治愈	韩晓辉	杨顺海	林达	眶骨骨折切开复位内固定术
389	C03眼科口腔	2024-09-08	2024-09-09	3542943	陶兴飞	男	18Y	取除骨折内固定装置		其他	韩晓辉	杨顺海	林达	去除面骨内固定装置
390	C03眼科口腔	2024-09-06	2024-09-10	3543159	卓乃坤	男	58Y	尺骨茎突骨折伴桡骨远端骨折	下肢动脉粥样硬化;前列腺结石	好转	黄俊武	胡炜	胡炜	桡骨骨折切开复位钢板内固定术;手、指和腕关节的其他修补术
391	C03眼科口腔	2024-09-10	2024-09-11	3543672	郑聪聪	女	18Y	眶骨骨折	眶内异物	治愈	韩晓辉	杨顺海	宋广伟	眶骨骨折切开复位内固定术;眶切开异物取出术
392	C03眼科口腔	2024-09-07	2024-09-11	3543808	陈春莲	女	55Y	锁骨骨折	肺部感染;胆囊息肉	治愈	黄义星	黄义星	卢晓郎	锁骨骨折切开复位钢板内固定术;锁骨人工骨植骨术
393	C03眼科口腔	2024-09-07	2024-09-12	3543872	谭译轩	男	4Y	肱骨外髁骨折	不完全性右束支传导阻滞	好转	孙辽军	项光恒	项光恒	肱骨骨折切开复位钢针内固定术;肘关节的其他修补术
394	C03眼科口腔	2024-09-07	2024-09-12	3544089	张骄	男	38Y	颧弓骨折	眶骨骨折	治愈	聂鑫	聂鑫	崔磊华	颧骨骨折切开复位内固定术
395	C03眼科口腔	2024-09-06	2024-09-14	3544605	朱君	男	33Y	肱骨远端骨折	脂肪肝;胆囊息肉;肺肿物	治愈	黄义星	卢晓郎	卢晓郎	肱骨骨折切开复位钢板内固定术;尺骨楔形截骨术;肘关节的其他修补术;尺神经松解术;尺骨骨折切开复位钢板内固定术
396	C03眼科口腔	2024-09-09	2024-09-14	3544618	林维亮	男	52Y	下颌骨骨折	牙折断	治愈	麻益可	麻益可	胡海锋	下颌骨骨折切开复位内固定术
397	C03眼科口腔	2024-08-31	2024-09-14	3544782	程广丰	男	47Y	眶骨骨折	上颌骨骨折;颧弓骨折;尺骨茎突骨折伴桡骨远端骨折;腕骨骨折;桡腕关节脱位;肺挫伤;胸腔积液;肋骨多处骨折;颞骨骨折;蝶骨骨折;创伤性硬脑膜外血肿;创伤性蛛网膜下腔出血;颅腔积气;头皮血肿;颈椎骨折C5;肝功能检查的异常结果;多处挫伤;颈椎间盘突出;脂肪肝	治愈	韩晓辉	杨顺海	林达	眶骨骨折切开复位内固定术;上颌骨骨折切开复位内固定术;桡骨骨折切开复位钢板内固定术;手、指和腕关节的其他修补术
398	C03眼科口腔	2024-09-09	2024-09-15	3545133	徐建廷	男	47Y	颧骨骨折		治愈	聂鑫	聂鑫	崔磊华	颧骨骨折切开复位内固定术
399	C03眼科口腔	2024-09-15	2024-09-16	3545568	余赞海	男	32Y	眶骨骨折	结膜损伤	治愈	韩晓辉	杨顺海	林达	眶骨骨折切开复位内固定术
400	C03眼科口腔	2024-09-10	2024-09-18	3546315	刘益坤	男	30Y	颧骨骨折	枕骨骨折	治愈	聂鑫	聂鑫	崔磊华	颧骨骨折切开复位内固定术
401	C03眼科口腔	2024-08-26	2024-09-19	3546555	周寿国	男	43Y	胫骨平台伴腓骨骨折	膝关节前十字韧带损伤;膝关节内侧副韧带损伤;创伤性蛛网膜下出血;眶骨骨折;牙槽骨骨折;外伤性牙齿缺失;头皮血肿;面部挫伤;膝关节积液;高血压;肺大疱;脂肪肝;肝囊肿	好转	水小龙	水小龙	徐宏威	胫骨骨折切开复位钢针内固定术;膝关节前交叉韧带重建术;副韧带修补术;眶骨骨折切开复位内固定术
402	C03眼科口腔	2024-09-09	2024-09-19	3546811	汪庆矿	男	33Y	上颌骨骨折		治愈	聂鑫	聂鑫	崔磊华	上颌骨骨折切开复位内固定术
403	C03眼科口腔	2024-09-14	2024-09-21	3547150	郑梦	女	27Y	下颌骨骨折		治愈	聂鑫	聂鑫	崔磊华	下颌骨骨折切开复位内固定术
404	C03眼科口腔	2024-09-14	2024-09-21	3547356	蔡恩平	男	45Y	眶骨骨折	上颌骨骨折;颧骨骨折;唇和口腔开放性伤口;创伤性牙齿脱落;多处挫伤	治愈	韩晓辉	杨顺海	林达	眶骨骨折切开复位内固定术;上颌骨骨折切开复位内固定术;拔牙术;皮肤和皮下组织非切除性清创
405	C03眼科口腔	2024-09-16	2024-09-21	3547366	周星丹	女	57Y	取除骨折内固定装置	特发性(原发性)高血压;孤立性肺结节;慢性乙型病毒性肝炎;主动脉钙化;心房肥大;退行性主动脉瓣疾患	其他	翁益民	翁益民	王特	肱骨内固定装置去除术;皮肤瘢痕切除术
406	C03眼科口腔	2024-09-12	2024-09-22	3547508	牛文浩	男	32Y	踝关节骨折	腓骨骨折;特发性肺纤维化;肝囊肿;肾结石;下肢静脉曲张	治愈	孙辽军	项光恒	项光恒	踝关节骨折切开复位钢板内固定术;踝关节修补术;腓骨人工骨植骨术
407	C03眼科口腔	2024-09-19	2024-09-22	3547675	李贵姚	女	12Y	取除骨折内固定装置		其他	聂鑫	聂鑫	崔磊华	下颌骨内固定装置取出术
408	C03眼科口腔	2024-09-11	2024-09-22	3547702	王厚发	男	60Y	股骨粗隆间骨折	肺大疱;肺的其他疾患;后天性肾囊肿;前列腺结石;下肢动脉粥样硬化;下肢静脉血栓形成;冠状动脉粥样硬化	治愈	孙辽军	项光恒	项光恒	股骨骨折闭合复位髓内针内固定术;股骨人工骨植骨术
409	C03眼科口腔	2024-09-16	2024-09-22	3547769	潘光宏	男	59Y	股骨髁间骨折	陈旧性胫骨平台骨折;骨质疏松;膝关节退行性病变;膝关节积液;心功能不全;脂肪肝;肾盂囊肿;前列腺增生	治愈	陈华	张秀孟	张秀孟	股骨骨折切开复位钢板内固定术;股骨人工骨植骨术
410	C03眼科口腔	2024-09-11	2024-09-23	3547939	郑爱凤	女	57Y	胫骨平台骨折	二尖瓣反流;胸腔积液;肝钙化灶;胆囊息肉	好转	翁益民	翁益民	王特	胫骨骨折切开复位钢板内固定术
411	C03眼科口腔	2024-09-22	2024-09-23	3548146	倪小利	男	32Y	眶骨骨折		治愈	韩晓辉	杨顺海	宋广伟	眶骨骨折切开复位内固定术
412	C03眼科口腔	2024-09-21	2024-09-24	3548528	卢奕呈	男	14Y	跟骨骨折	骰骨骨折;跖骨骨折	好转	黄俊武	胡炜	胡炜	跟骨骨折闭合复位钢针内固定术;跖骨骨折切开复位钢针内固定术;石膏绷带固定
413	C03眼科口腔	2024-09-20	2024-09-25	3548865	虞晓克	男	23Y	骨折内固定物植入感染	软组织感染	治愈	陈华	张秀孟	张秀孟
414	C03眼科口腔	2024-09-29	2024-09-30	3550803	杨小波	男	30Y	取除骨折内固定装置	视神经和视路损伤;鼻骨骨折	其他	韩晓辉	杨顺海	林达	去除面骨内固定装置
415	C03眼科口腔	2024-09-22	2024-09-30	3551013	龙飞扬	男	12Y	尺骨和桡骨下端均骨折		好转	翁益民	翁益民	王特	桡骨骨折切开复位钢板内固定术;桡骨人工骨植骨术
416	C03眼科口腔	2024-09-26	2024-10-01	3551299	吴祥东	男	54Y	眼球破裂伤	创伤性晶状体脱位;视网膜脱离;脉络膜脱离;创伤性前房积血;泪小管裂伤;结膜下出血;眼睑裂伤;眶骨骨折;翼状胬肉	好转	董志章	杨顺海	宋广伟	泪小管吻合术;鼻泪管插管术;眼睑裂伤缝合术;内眦成形术;后入路玻璃体切割术;眼球破裂修补术;白内障囊内摘除术
417	C03眼科口腔	2024-09-26	2024-10-01	3551527	金治利	男	49Y	颧骨骨折		治愈	聂鑫	聂鑫	崔磊华	颧骨骨折切开复位内固定术
418	C03眼科口腔	2024-09-26	2024-10-02	3551647	林向东	男	56Y	掌骨骨折	掌指关节脱位;老年性心脏病;肝回声不均;肾结石;前列腺增生;前列腺结石;下肢动脉粥样硬化;肺肿物	治愈	余可和	余可和	汪吉棋	掌骨骨折切开复位钢板内固定术;手、指和腕关节的其他修补术
419	C03眼科口腔	2024-09-24	2024-10-02	3551866	刘露	女	23Y	眶骨骨折	颧骨骨折;上颌骨骨折	治愈	韩晓辉	杨顺海	张煜	眶骨骨折切开复位内固定术;上颌骨骨折切开复位内固定术;颧骨骨折切开复位内固定术
420	C03眼科口腔	2024-09-28	2024-10-06	3552731	徐增杰	男	31Y	尺骨干骨折	肺大疱;特发性肺纤维化	好转	黄俊武	胡炜	胡炜	尺骨骨折切开复位钢板内固定术
421	C03眼科口腔	2024-09-23	2024-10-06	3552783	谢玲君	男	34Y	下颌骨骨折		治愈	聂鑫	聂鑫	崔磊华	下颌骨骨折切开复位内固定术
422	C03眼科口腔	2024-09-20	2024-10-07	3553076	黎爱香	女	62Y	髌骨骨折	2型糖尿病;脂肪肝;后天性肾囊肿	好转	黄俊武	胡炜	胡炜	髌骨骨折切开复位张力带钢丝内固定术;膝关节的其他修补术;股四头肌成形术
423	C03眼科口腔	2024-10-06	2024-10-09	3553715	陈细花	女	48Y	颧弓骨折	眶骨骨折	治愈	麻益可	麻益可	胡海锋	颧骨骨折切开复位内固定术
424	C03眼科口腔	2024-09-25	2024-10-10	3553903	罗寿飞	男	28Y	上颌骨骨折	下颌骨骨折;眶骨骨折	治愈	聂鑫	聂鑫	黄武	上颌骨骨折切开复位内固定术;下颌骨骨折切开复位内固定术
425	C03眼科口腔	2024-10-10	2024-10-11	3554352	方圆	男	33Y	掌骨骨折	由于其他和未特指原因而使病人决定不进行操作	未愈	余可和	余可和	汪吉棋
426	C03眼科口腔	2024-09-30	2024-10-12	3554453	叶美兰	女	62Y	白内障	2型糖尿病;高血压;高脂血症;下肢动脉粥样硬化;颈动脉硬化;骨质疏松;后天性肾囊肿;肺肿物;肋骨多处骨折	治愈	韩晓辉	杨顺海	郭燕	白内障超声乳化抽吸术;白内障超声乳化抽吸术;白内障超声乳化抽吸术;白内障摘除伴人工晶体一期置入术
427	C03眼科口腔	2024-10-02	2024-10-12	3554579	田建军	男	28Y	下颌骨骨折		治愈	聂鑫	聂鑫	黄武	下颌骨骨折切开复位内固定术
428	C03眼科口腔	2024-10-06	2024-10-12	3554597	罗启仁	男	29Y	取除骨折内固定装置		其他	韩晓辉	杨顺海	张煜	去除面骨内固定装置
429	C03眼科口腔	2024-10-07	2024-10-12	3554642	徐一楷	男	18Y	眶骨骨折	上颌骨骨折;结膜下出血;屈光不正	治愈	韩晓辉	杨顺海	张煜	眶骨骨折切开复位内固定术;上颌骨骨折切开复位内固定术
430	C03眼科口腔	2024-10-04	2024-10-13	3554910	梁世高	男	24Y	下颌骨骨折		治愈	麻益可	麻益可	胡海锋	下颌骨骨折切开复位内固定术;拔牙术
431	C03眼科口腔	2024-10-13	2024-10-14	3555361	章胡平	女	53Y	眶骨骨折		治愈	韩晓辉	杨顺海	张煜	眶骨骨折切开复位内固定术
432	C03眼科口腔	2024-10-13	2024-10-14	3555444	卓爱丹	女	36Y	眶骨骨折	癫痫	治愈	韩晓辉	杨顺海	张煜	眶骨骨折切开复位内固定术
433	C03眼科口腔	2024-10-13	2024-10-14	3555580	冉茂友	男	40Y	眶骨骨折	由于其他和未特指原因而使病人决定不进行操作;颧弓骨折;上颌骨骨折;面部软组织挫伤;结膜下出血	未愈	韩晓辉	杨顺海	郭燕
434	C03眼科口腔	2024-10-02	2024-10-15	3555708	罗孝卫	男	30Y	眼球破裂伤	视网膜脱离;玻璃体积血;白内障;眼睑裂伤;眶骨骨折	治愈	冯旺强	冯旺强	林达	眼球破裂修补术;后入路玻璃体切割术;前房成形术;结膜囊成形术;内眦成形术;视网膜脱离激光治疗术;视网膜裂孔电凝术;白内障切割吸出术;玻璃体硅油填充术;玻璃体腔重水注射术，视网膜复位术
435	C03眼科口腔	2024-10-15	2024-10-16	3556260	何光隶	男	39Y	眶骨骨折	鼻骨骨折;视神经损伤	治愈	韩晓辉	杨顺海	张煜	眶骨骨折切开复位内固定术;鼻骨折开放性复位术
436	C03眼科口腔	2024-10-05	2024-10-16	3556355	叶良远	男	19Y	视神经损伤	颧骨骨折;上颌骨骨折;眶骨骨折;头部的损伤	治愈	麻益可	麻益可	胡海锋	颧骨骨折切开复位内固定术;内镜下视神经减压术;上颌骨骨折切开复位内固定术;内镜下眶减压术;眶骨骨折切开复位内固定术;内镜下鼻甲部分切除术
437	C03眼科口腔	2024-10-12	2024-10-16	3556407	梁世昌	男	21Y	上颌骨骨折	颧骨骨折	治愈	麻益可	麻益可	胡海锋	上颌骨骨折切开复位内固定术;颧骨骨折切开复位内固定术
438	C03眼科口腔	2024-10-08	2024-10-18	3557014	王建锋	男	35Y	Pilon骨折	腰椎骨折;胫骨良性肿瘤;腰椎间盘突出;胆囊息肉	好转	黄俊武	胡炜	胡炜	胫骨骨折切开复位钢板内固定术;腓骨骨折切开复位钢板内固定术;踝关节的其他修补术;胫骨人工骨植骨术
439	C03眼科口腔	2024-10-12	2024-10-19	3557206	王怀军	男	40Y	下颌骨骨折		治愈	聂鑫	聂鑫	黄武	下颌骨骨折切开复位内固定术
440	C03眼科口腔	2024-10-12	2024-10-19	3557237	李干	男	40Y	跟骨骨折		好转	水小龙	水小龙	徐宏威	跟骨骨折切开复位钢板内固定术;踝关节修补术
441	C03眼科口腔	2024-10-11	2024-10-19	3557264	王峰	男	31Y	锁骨骨折	肋骨多处骨折;创伤性湿肺;面部软组织挫伤;肺肿物;鼻窦炎	治愈	孙辽军	项光恒	项光恒	锁骨骨折切开复位钢板内固定术;锁骨人工骨植骨术
442	C03眼科口腔	2024-10-15	2024-10-19	3557294	金权利	男	46Y	取除骨折内固定装置		其他	翁益民	翁益民	王特	踝关节内固定装置去除术;皮肤瘢痕切除术
443	C03眼科口腔	2024-10-11	2024-10-19	3557300	郭献庆	男	32Y	眶骨骨折	颧弓骨折;上颌骨骨折;视神经和视路损伤;创伤性蛛网膜下腔出血;创伤性颅内积气	治愈	韩晓辉	杨顺海	张煜	眶骨骨折切开复位内固定术;颧骨骨折切开复位内固定术;上颌骨骨折切开复位内固定术
444	C03眼科口腔	2024-10-10	2024-10-19	3557313	陶永富	男	15Y	胫骨骨干骨折	头皮血肿;多处挫伤	治愈	孙辽军	项光恒	项光恒	胫骨骨折切开复位钢板内固定术;胫骨人工骨植骨术
445	C03眼科口腔	2024-10-11	2024-10-19	3557376	汤碎媛	女	84Y	腰椎骨折	二尖瓣关闭不全;心房扩大;肺动脉高压;下肢动脉粥样硬化;胫前动脉闭塞;脾钙化;后天性肾囊肿;下肢静脉曲张	好转	黄俊武	胡炜	胡炜	腰椎骨折球囊扩张成形术
446	C03眼科口腔	2024-10-16	2024-10-21	3558314	李鹏翔	男	30Y	取除骨折内固定装置		其他	聂鑫	聂鑫	黄武	去除面骨内固定装置
447	C03眼科口腔	2024-10-20	2024-10-21	3558367	张启江	男	47Y	取除骨折内固定装置		其他	韩晓辉	杨顺海	张煜	去除面骨内固定装置
448	C03眼科口腔	2024-10-06	2024-10-22	3558642	张邦俊	男	57Y	眼撕裂伤和破裂伴有眼内组织脱出或缺失	前房积血;创伤性晶状体脱位;眼睑裂伤;视网膜脱离;脉络膜脱离;眶骨骨折;2型糖尿病	治愈	郑海华	杨顺海	郭燕	眼球破裂修补术;前房成形术;结膜囊成形术;眦成形术;眼睑裂伤缝合术;前房冲洗术;前入路玻璃体切割术
449	C03眼科口腔	2024-10-13	2024-10-22	3558760	向世新	男	51Y	面部裂伤	周围性面神经麻痹;寰椎骨折;寰枢椎半脱位;颞骨骨折	好转	聂鑫	聂鑫	黄武	皮肤和皮下组织非切除性清创
450	C03眼科口腔	2024-10-22	2024-10-22	3558904	林文胜	男	46Y	2型糖尿病性视网膜病变	黄斑水肿;眼球挫伤;眼睑挫伤;眶骨骨折;面部软组织挫伤;2型糖尿病	好转	韩晓辉	杨顺海	郭燕	玻璃体药物注射术;前房穿刺术
451	C03眼科口腔	2024-10-11	2024-10-23	3559239	邱朝銮	男	71Y	眶骨骨折	眼睑裂伤;多处挫伤;特发性(原发性)高血压;心脏搭桥术后;多发性脑梗死;脑萎缩;脂肪肝;胆囊结石	治愈	韩晓辉	杨顺海	张煜	眶骨骨折切开复位内固定术
452	C03眼科口腔	2024-10-19	2024-10-23	3559263	季梅鹤	女	42Y	颧骨骨折	上颌骨骨折;眶骨骨折	治愈	麻益可	麻益可	胡海锋	颧骨骨折切开复位内固定术;上颌骨骨折切开复位内固定术
453	C03眼科口腔	2024-10-18	2024-10-24	3559645	杨立超	男	37Y	趾骨骨折	颈部局部肿物;脂肪肝;胆囊息肉;前列腺结石	好转	黄俊武	胡炜	胡炜	趾骨骨折切开复位钢针内固定术
454	C03眼科口腔	2024-10-12	2024-10-26	3560123	黄陈云	男	59Y	锁骨骨折	多发性腰椎骨折;膝半月板撕裂;膝关节内侧副韧带损伤;膝关节积液;胫骨平台骨折;膝关节后十字韧带损伤;膝关节外侧副韧带部分断裂;肺挫伤;脂肪肝;肾积水伴肾结石;前列腺增生	好转	翁益民	翁益民	王特	锁骨骨折切开复位钢板内固定术;腰椎骨折球囊扩张成形术
455	C03眼科口腔	2024-10-27	2024-10-27	3560690	戴银雷	男	37Y	取除骨折内固定装置	由于禁忌证而未进行操作;窦性心动过缓	其他	韩晓辉	杨顺海	郭燕
456	C03眼科口腔	2024-10-19	2024-10-27	3560705	高成付	男	37Y	眶骨骨折	颧弓骨折;额骨骨折	治愈	韩晓辉	杨顺海	张煜	眶骨骨折切开复位内固定术;颧骨骨折切开复位内固定术
457	C03眼科口腔	2024-10-15	2024-10-27	3560809	邵进树	男	60Y	眶骨骨折	上颌骨骨折;颧弓骨折;眼球挫伤;视神经损伤;颅腔积气;肌腱和肌肉损伤;胸椎骨折;颈椎间盘突出	治愈	韩晓辉	杨顺海	张煜	上颌骨骨折切开复位内固定术;颧骨骨折切开复位内固定术;眶骨骨折切开复位内固定术
458	C03眼科口腔	2024-10-18	2024-10-27	3560891	叶阿国	男	60Y	眶骨骨折	颧骨骨折;眼球挫伤;面部软组织挫伤;头部的浅表损伤;头皮血肿;开放性胸部损伤;肺挫伤;胸腔积液;肩胛骨骨折;肋骨多发性骨折伴第一肋骨骨折;心包积液;肺大疱	治愈	韩晓辉	杨顺海	郭燕	眶骨骨折切开复位内固定术;颧骨骨折切开复位内固定术;面骨骨移植
459	C03眼科口腔	2024-10-24	2024-10-28	3561134	陈芷涵	女	3Y	上颌骨骨折		好转	聂鑫	聂鑫	徐兴侨
460	C03眼科口腔	2024-10-27	2024-10-28	3561270	唐中于	男	50Y	眼球破裂伤	眶内异物;眼睑裂伤;眶骨骨折	治愈	郑穗联	陈婕灵	宋广伟	眼球破裂修补术;眶切开异物取出术;眼睑裂伤缝合术
461	C03眼科口腔	2024-10-17	2024-10-29	3561611	林文杰	男	41Y	眼球破裂伤	眼睑裂伤;眶骨骨折;上颌骨骨折;颧弓骨折;鼻骨骨折;特发性(原发性)高血压;心房颤动;上睑下垂	治愈	韩晓辉	杨顺海	张煜	眼球破裂修补术;眼睑裂伤缝合术;眶骨骨折切开复位内固定术;上颌骨骨折切开复位内固定术;颧骨骨折切开复位内固定术;眼球摘除伴义眼台置入术
462	C03眼科口腔	2024-10-25	2024-10-30	3561779	许永适	男	62Y	外踝骨折	肝回声不均;胆囊息肉;前列腺增生;前列腺结石	好转	余可和	余可和	汪吉棋	踝关节骨折切开复位钢板内固定术;腓骨人工骨植骨术;踝关节修补术
463	C03眼科口腔	2024-10-24	2024-10-30	3561812	黄春恩	男	60Y	掌骨骨折	下肢动脉硬化闭塞症;肾结石;肺部感染;肺肿物;肺大疱;主动脉钙化;肝囊肿;下肢静脉曲张	好转	余可和	余可和	汪吉棋	掌骨骨折切开复位钢板内固定术;掌骨人工骨植骨术
464	C03眼科口腔	2024-10-28	2024-10-31	3562363	楚银珍	女	44Y	眶骨骨折	眼球挫伤;创伤性晶状体脱位;外伤性白内障;玻璃体积血;视网膜变性;上睑下垂;眼睑裂伤;高度近视;视神经损伤	治愈	韩晓辉	杨顺海	张煜	眶骨骨折切开复位内固定术
465	C03眼科口腔	2024-10-20	2024-11-02	3562834	罗兴付	男	49Y	颧骨和上颌骨骨折	结膜损伤	治愈	聂鑫	聂鑫	黄武	上颌骨骨折切开复位内固定术;颧骨骨折切开复位内固定术
466	C03眼科口腔	2024-11-03	2024-11-04	3563866	戴银雷	男	37Y	取除骨折内固定装置	窦性心动过缓	其他	韩晓辉	杨顺海	张煜	去除面骨内固定装置
467	C03眼科口腔	2024-10-21	2024-11-04	3564029	罗丽华	女	78Y	骨盆骨折	眼撕裂伤不伴有眼内组织脱出或缺失;尺骨和桡骨下端均骨折;胫骨平台伴腓骨骨折;腓骨骨折;肋骨多处骨折;颈椎退行性病变;高血压;后天性肾囊肿;肝回声不均;胆囊结石;多发性脑梗死	治愈	陈龙	白炳力	白炳力	骨盆骨折闭合性复位术;盆骨外固定术;桡骨骨折切开复位钢板内固定术;尺骨骨折切开复位钢板内固定术;胫骨骨折切开复位钢板内固定术;膝关节的其他修补术;眼球破裂修补术
468	C03眼科口腔	2024-11-02	2024-11-05	3564314	陈志威	男	30Y	下颌骨骨折		治愈	麻益可	麻益可	胡海锋	下颌骨骨折切开复位内固定术
469	C03眼科口腔	2024-11-03	2024-11-06	3564843	陈培红	女	35Y	颧骨骨折		治愈	麻益可	麻益可	胡海锋	颧骨骨折切开复位内固定术
470	C03眼科口腔	2024-11-04	2024-11-09	3565593	林文杰	男	41Y	眶骨骨折	颧弓骨折;义眼座植入术后;特发性(原发性)高血压;骨折术后恢复期	治愈	韩晓辉	杨顺海	郭燕	眶骨骨折切开复位内固定术
471	C03眼科口腔	2024-10-22	2024-11-10	3566271	陈六明	男	46Y	眶骨骨折	上颌骨骨折;颧弓骨折;鼻骨骨折;眼睑裂伤;髋臼骨折;尺骨茎突骨折伴桡骨远端骨折;颅腔积气;多处挫伤;肋骨多处骨折;肺挫伤	治愈	韩晓辉	杨顺海	郭燕	眶骨骨折切开复位内固定术;髋骨骨折切开复位钢板内固定术;髋骨人工骨植骨术;桡骨骨折切开复位钢板内固定术;尺桡关节脱位切开复位术;桡骨人工骨植骨术;上颌骨骨折切开复位内固定术;眦成形术
472	C03眼科口腔	2024-11-10	2024-11-11	3566562	张琼	女	34Y	眶骨骨折		治愈	韩晓辉	杨顺海	张煜	眶骨骨折切开复位内固定术
473	C03眼科口腔	2024-11-05	2024-11-12	3567259	黄彩玉	女	71Y	下颌骨骨折	牙龈开放性损伤;心房颤动;肋骨多处骨折;多处开放性伤口	治愈	麻益可	麻益可	曹玉慧	下颌骨骨折切开复位内固定术;拔除其他牙
474	C03眼科口腔	2024-11-11	2024-11-18	3569408	鲍晓洁	女	8Y	眶骨骨折	上颌骨骨折;颧弓骨折;眼睑裂伤	治愈	韩晓辉	杨顺海	张煜	眶骨骨折切开复位内固定术;上颌骨骨折切开复位内固定术;颧骨骨折切开复位内固定术
475	C03眼科口腔	2024-11-17	2024-11-18	3569480	余孝五	男	52Y	取除骨折内固定装置		其他	韩晓辉	杨顺海	张煜	去除面骨内固定装置
476	C03眼科口腔	2024-11-17	2024-11-18	3569518	程晓刚	男	34Y	眶骨骨折		治愈	韩晓辉	杨顺海	郭燕	眶骨骨折切开复位内固定术
477	C03眼科口腔	2024-11-14	2024-11-23	3571269	张胜军	男	65Y	锁骨骨折	多处挫伤;肝囊肿;完全性右束支传导阻滞	治愈	黄义星	卢晓郎	卢晓郎	锁骨骨折切开复位钢板内固定术;锁骨人工骨植骨术
478	C03眼科口腔	2024-11-15	2024-11-23	3571295	杨庆芬	女	49Y	颧骨骨折	鼻骨骨折;额骨骨折;眶骨骨折	治愈	聂鑫	聂鑫	于健涛	颧骨骨折切开复位内固定术
479	C03眼科口腔	2024-11-15	2024-11-24	3571740	张淑晴	女	6Y	创伤性牙脱位	头部多处开放性伤口;牙槽骨骨折	好转	麻益可	周李杰	曹玉慧	皮肤和皮下组织非切除性清创;皮肤缝合术;牙栓结术
480	C03眼科口腔	2024-11-24	2024-11-24	3571992	娄维月	男	86Y	白内障	青光眼术后;人工晶体植入状态;陈旧性肋骨骨折	治愈	郑海华	杨顺海	郭燕	白内障超声乳化抽吸术;白内障摘除伴人工晶体一期置入术
481	C03眼科口腔	2024-11-21	2024-11-25	3572208	陈丽冬	女	55Y	取除骨折内固定装置		其他	聂鑫	聂鑫	于健涛	下颌骨内固定装置取出术
482	C03眼科口腔	2024-11-24	2024-11-25	3572284	陈振龙	男	29Y	取除骨折内固定装置		其他	韩晓辉	杨顺海	张煜	去除面骨内固定装置
483	C03眼科口腔	2024-11-24	2024-11-25	3572437	林祝河	男	54Y	眶骨骨折	眼球挫伤;结膜下出血;特发性(原发性)高血压	治愈	韩晓辉	杨顺海	张煜	眶骨骨折切开复位内固定术
484	C03眼科口腔	2024-11-11	2024-11-26	3572584	林宸宇	男	3Y	取除骨折内固定装置	脑外伤后遗症;运动障碍;中枢性面神经麻痹	其他	聂鑫	陈珊	于健涛	下颌骨内固定装置取出术
485	C03眼科口腔	2024-12-01	2024-12-02	3575104	刘建光	男	59Y	眶骨骨折		治愈	韩晓辉	杨顺海	张煜	眶骨骨折切开复位内固定术
486	C03眼科口腔	2024-12-01	2024-12-02	3575106	吴钱锋	男	42Y	取除骨折内固定装置		其他	韩晓辉	杨顺海	郭燕	去除面骨内固定装置
487	C03眼科口腔	2024-12-01	2024-12-02	3575117	侯百儒	男	9Y	取除骨折内固定装置		其他	韩晓辉	杨顺海	郭燕	眶骨内固定装置取出术
488	C03眼科口腔	2024-12-02	2024-12-03	3575501	杨波	男	37Y	内踝骨折	胆囊息肉;肾结石	未愈	孙辽军	孙辽军	郑文浩
489	C03眼科口腔	2024-12-03	2024-12-04	3575857	梅立厂	男	49Y	取除骨折内固定装置		其他	韩晓辉	杨顺海	张煜	去除面骨内固定装置
490	C03眼科口腔	2024-12-03	2024-12-04	3575912	杨敏	女	30Y	鼻骨骨折		好转	项松洁	蒋昌灿	蒋昌灿	鼻骨折闭合性复位术
491	C03眼科口腔	2024-11-26	2024-12-05	3576267	谢子彦	男	71Y	下颌骨骨折	颧弓骨折	治愈	聂鑫	聂鑫	于健涛	下颌骨骨折切开复位内固定术;颧弓骨折切开复位术
492	C03眼科口腔	2024-11-30	2024-12-08	3577466	南金明	男	47Y	眼撕裂伤和破裂伴有眼内组织脱出或缺失	虹膜根部离断;创伤性晶状体脱位;脉络膜脱离;视网膜脱离;前房积血;眼睑裂伤;结膜损伤;眶骨骨折;高血压	好转	董志章	董志章	张罗丽	眼球破裂修补术;眼睑裂伤缝合术;前房成形术;前房冲洗术;前入路玻璃体切割术
493	C03眼科口腔	2024-12-08	2024-12-09	3577848	赵克海	男	34Y	取除骨折内固定装置		其他	韩晓辉	杨顺海	张煜	去除面骨内固定装置
494	C03眼科口腔	2024-12-07	2024-12-11	3578494	陈绍栋	男	66Y	眶骨骨折	颧弓骨折;眼睑裂伤;翼状胬肉;白内障	治愈	韩晓辉	杨顺海	郭燕	眶骨骨折切开复位内固定术;颧骨骨折切开复位内固定术;面骨骨移植
495	C03眼科口腔	2024-11-26	2024-12-11	3578632	徐爱忠	女	40Y	眶骨骨折	颧骨骨折;上颌骨骨折;鼻骨骨折;面部软组织挫伤;上臂多发肌腱损伤;乙型肝炎小三阳	治愈	韩晓辉	杨顺海	郭燕	眶骨骨折切开复位内固定术;颧骨骨折切开复位内固定术;上颌骨骨折切开复位内固定术;内镜下鼻骨骨折切开复位术
496	C03眼科口腔	2024-12-10	2024-12-11	3578714	方文祥	男	42Y	取除骨折内固定装置	人工晶体植入状态;视网膜色素变性	其他	韩晓辉	杨顺海	张煜	去除面骨内固定装置
497	C03眼科口腔	2024-12-09	2024-12-11	3578759	王秋梅	女	52Y	泪小管裂伤	眼睑裂伤;眶骨骨折;低色素性小细胞性贫血	治愈	郑穗联	陈婕灵	宋广伟	泪小管吻合术;眼睑裂伤缝合术;内眦成形术;鼻泪管探通术;泪小管穿线插管术
498	C03眼科口腔	2024-12-07	2024-12-12	3579199	颜昌涛	男	54Y	颧骨和上颌骨骨折	腕骨骨折	未愈	聂鑫	聂鑫	徐冬冬
499	C03眼科口腔	2024-12-09	2024-12-14	3579957	黄成果	男	33Y	颧弓骨折	眶骨骨折;下颌骨骨折;上颌窦骨折;颞骨骨折;多处挫伤	未愈	聂鑫	聂鑫	徐冬冬
500	C03眼科口腔	2024-12-11	2024-12-15	3580298	井平舟	男	30Y	胫骨平台骨折	由于其他原因而未进行操作;膝关节积液	好转	翁益民	翁益民	蔡乐益
501	C03眼科口腔	2024-12-10	2024-12-21	3582327	徐龙翠	女	68Y	髌骨骨折	特发性(原发性)高血压;脂肪肝;肺肿物;心功能不全;主动脉瓣关闭不全	好转	翁益民	翁益民	蔡乐益	髌骨骨折切开复位张力带钢丝内固定术;膝关节的其他修补术;膝关节滑膜切除术;股四头肌成形术
502	C03眼科口腔	2024-12-11	2024-12-21	3582613	张兴国	男	61Y	下颌骨骨折		治愈	聂鑫	聂鑫	徐冬冬	下颌骨骨折切开复位内固定术
503	C03眼科口腔	2024-12-21	2024-12-22	3582824	邱阿珠	女	64Y	无晶状体	眶骨骨折;白内障;风湿病	治愈	冯旺强	董志章	林达	人工晶体二期置入术
504	C03眼科口腔	2024-12-18	2024-12-22	3583041	叶大陆	男	88Y	泪小管裂伤	眼睑裂伤;虹膜离断;创伤性晶状体脱位;白内障;眶骨骨折;上颌骨骨折;鼻骨骨折;鼻中隔骨折;痴呆;陈旧性脑梗死;老年性脑萎缩;肝胆管结石;胆管扩张	治愈	冯旺强	董志章	林达	泪小管吻合术;眼睑裂伤缝合术;眦成形术;泪小管穿线插管术;结膜囊成形术
505	C03眼科口腔	2024-12-23	2024-12-23	3583433	潘行	男	31Y	取除骨折内固定装置	由于其他和未特指原因而使病人决定不进行操作	其他	麻益可	麻益可	曹玉慧
506	C03眼科口腔	2024-12-16	2024-12-24	3583615	曾云共	男	51Y	膝关节内侧副韧带损伤	膝关节积液;胫骨近端骨折;膝半月板撕裂;膝关节退行性病变;后天性肾囊肿;肺炎	治愈	陈龙	陈龙	应晓洲	副韧带修补术
507	C03眼科口腔	2024-12-21	2024-12-25	3584240	牟艳忠	男	43Y	泪小管断裂	眶骨骨折;眼睑裂伤	治愈	韩晓辉	杨顺海	张煜	泪小管吻合术;鼻泪管插管术;眶骨骨折切开复位内固定术
508	C03眼科口腔	2024-12-18	2024-12-25	3584254	王建波	男	52Y	眶骨骨折	视网膜损伤;结膜下出血;眼睑裂伤	好转	郑海华	杨顺海	张煜
509	C03眼科口腔	2024-12-22	2024-12-26	3584739	陈讲华	男	42Y	颧弓骨折		治愈	聂鑫	聂鑫	徐冬冬	颧骨骨折切开复位内固定术
510	C03眼科口腔	2024-12-11	2024-12-27	3584843	何晓	男	53Y	胫腓骨下端骨折	特发性(原发性)高血压;心功能不全;脂肪肝;后天性肾囊肿	好转	翁益民	翁益民	蔡乐益	胫骨骨折切开复位钢板内固定术;腓骨骨折闭合复位钢板内固定术;胫骨人工骨植骨术
511	C03眼科口腔	2024-12-19	2024-12-27	3584916	刘志鹏	男	39Y	下颌骨骨折	颞下颌关节紊乱病	治愈	麻益可	麻益可	曹玉慧	下颌骨骨折切开复位内固定术;带蒂皮瓣迁徙术
512	C03眼科口腔	2024-12-22	2024-12-30	3586172	贾明通	男	60Y	视网膜脱离	白内障;2型糖尿病;小腿软组织异物残留;下肢动脉硬化闭塞症;肺恶性肿瘤;颅内继发恶性肿瘤;高血压;肾盂结石;输尿管下段结石;输尿管扩张;心房扑动;脂肪肝;胆囊结石;肋骨多处骨折;骨折术后;颈椎间盘突出	治愈	郑海华	杨顺海	郭燕	后入路玻璃体切割术;视网膜脱离激光治疗术;白内障超声乳化抽吸术;白内障摘除伴人工晶体一期置入术
513	C03眼科口腔	2024-12-21	2024-12-30	3586259	徐爱忠	女	40Y	骨内固定装置障碍	骨折术后恢复期;面部软组织挫伤;冈上肌肌腱损伤;三角肌损伤;乙型肝炎小三阳	好转	韩晓辉	杨顺海	郭燕	眶骨内固定装置取出术;眶骨骨折切开复位术
514	C04综合病房	2023-12-19	2024-01-01	3465840	李妹	女	26Y	创伤性膀胱破裂	创伤性脾破裂;腹腔积液;背部挫伤;肋骨骨折;臀部挫伤	治愈	杨越涛	杨越涛	徐训政	膀胱修补术;脾修补术;开腹探查术;腹腔冲洗检查
515	C04综合病房	2024-01-06	2024-01-07	3468259	林江忠	男	47Y	取除骨折内固定装置	高血压;脂肪肝;胆囊息肉;肾结石	其他	陈龙	应晓洲	应晓洲	肱骨内固定装置去除术
516	C04综合病房	2024-01-06	2024-01-07	3468263	卢超	男	39Y	取除骨折内固定装置	高血压;脂肪肝;肝囊肿;前列腺结石	其他	陈龙	应晓洲	应晓洲	跟骨内固定物取出术
517	C04综合病房	2024-01-06	2024-01-07	3468264	李阿菊	女	63Y	取除骨折内固定装置	在腕和手水平的肌肉和肌腱的损伤;高血压;高脂血症	其他	陈龙	应晓洲	应晓洲	桡骨内固定装置去除术;肌腱修补术
518	C04综合病房	2024-01-06	2024-01-07	3468266	徐昌访	男	38Y	取除骨折内固定装置	脂肪肝	其他	陈龙	应晓洲	应晓洲	肩锁关节内固定物取出术
519	C04综合病房	2024-01-09	2024-01-10	3469788	夏邦剑	男	43Y	取除骨折内固定装置	脂肪肝;肝囊肿;特发性肺纤维化	其他	洪建军	卢晓郎	卢晓郎	髌骨内固定装置去除术;皮肤瘢痕切除术
520	C04综合病房	2024-01-09	2024-01-10	3469791	陈小娟	女	64Y	取除骨折内固定装置	高血压;皮下结节;肝囊肿;肝回声不均;肾钙化	其他	陈龙	应晓洲	应晓洲	髌骨内固定装置去除术
521	C04综合病房	2024-01-08	2024-01-10	3469793	陈先法	男	43Y	取除骨折内固定装置		其他	杨雷	周一飞	白炳力	胫骨内固定装置去除术
522	C04综合病房	2024-01-08	2024-01-10	3469795	施渊强	男	16Y	取除骨折内固定装置		其他	杨雷	周一飞	白炳力	桡骨内固定装置去除术
523	C04综合病房	2024-01-08	2024-01-10	3469806	戴剑	男	39Y	取除骨折内固定装置		其他	杨雷	周一飞	白炳力	掌骨内固定装置去除术
524	C04综合病房	2024-01-09	2024-01-10	3469809	付广锚	男	25Y	取除骨折内固定装置	脂肪肝	其他	陈龙	应晓洲	应晓洲	肱骨内固定装置去除术;皮肤瘢痕切除术
525	C04综合病房	2024-01-09	2024-01-10	3469938	杨美柳	女	56Y	取除骨折内固定装置	高血压;脂肪肝	其他	陈龙	应晓洲	应晓洲	踝关节内固定装置去除术
526	C04综合病房	2024-01-11	2024-01-12	3470593	黄可实	男	34Y	取除骨折内固定装置		其他	陈龙	应晓洲	应晓洲	锁骨内固定装置去除术
527	C04综合病房	2024-01-11	2024-01-12	3470599	杜继忠	男	33Y	取除骨折内固定装置		其他	陈龙	应晓洲	应晓洲	锁骨内固定装置去除术
528	C04综合病房	2024-01-11	2024-01-12	3470611	廖美华	女	38Y	取除骨折内固定装置		其他	陈龙	应晓洲	应晓洲	肱骨内固定装置去除术
529	C04综合病房	2024-01-11	2024-01-13	3470787	金学士	男	77Y	腹股沟纳氏囊肿	腹股沟术后;睾丸鞘膜积液;肋骨多处骨折;肺大疱;前列腺增生;下肢动脉硬化闭塞症;老年性心脏病;主动脉钙化	治愈	杨越涛	杨越涛	徐训政	腹股沟病损切除术
530	C04综合病房	2024-01-11	2024-01-14	3471359	陈清明	男	46Y	取除骨折内固定装置	脂肪肝	其他	陈龙	应晓洲	应晓洲	胫骨内固定装置去除术
531	C04综合病房	2024-01-13	2024-01-14	3471590	章爱玉	女	64Y	取除骨折内固定装置	胆囊息肉;肢体诊断性影像检查的异常所见	其他	陈龙	应晓洲	应晓洲	髌骨内固定装置去除术
532	C04综合病房	2024-01-13	2024-01-14	3471640	梁树武	男	57Y	取除骨折内固定装置		其他	陈龙	应晓洲	应晓洲	锁骨内固定装置去除术
533	C04综合病房	2024-01-13	2024-01-15	3472037	李俊	男	26Y	取除骨折内固定装置	脂肪肝	其他	陈龙	应晓洲	应晓洲	股骨内固定装置去除术;掌骨内固定装置去除术
534	C04综合病房	2024-01-13	2024-01-15	3472043	余永芬	女	64Y	取除骨折内固定装置	半月板损伤;膝关节十字韧带损伤;肾结石;肺诊断性影像异常;陈旧性肋骨骨折;膝关节内侧副韧带扭伤;膝关节外侧副韧带部分断裂;主动脉(瓣)关闭不全;二尖瓣反流;心功能不全	其他	陈龙	应晓洲	应晓洲	胫骨内固定装置去除术
535	C04综合病房	2024-01-14	2024-01-17	3472982	尤若瑶	女	16Y	取除骨折内固定装置		其他	杨雷	周一飞	白炳力	髌骨内固定装置去除术
536	C04综合病房	2024-01-16	2024-01-17	3473366	金克	男	36Y	取除骨折内固定装置		其他	陈龙	陈龙	应晓洲	锁骨内固定装置去除术
537	C04综合病房	2024-01-16	2024-01-17	3473369	陈玲	女	33Y	取除骨折内固定装置		其他	陈龙	陈龙	应晓洲	锁骨内固定装置去除术
538	C04综合病房	2024-01-17	2024-01-18	3473862	徐喜淳	男	11Y	取除骨折内固定装置		其他	陈龙	陈龙	应晓洲	趾骨内固定装置去除术
539	C04综合病房	2024-01-17	2024-01-18	3473863	陈洪达	男	32Y	取除骨折内固定装置		其他	陈龙	陈龙	应晓洲	桡骨内固定装置去除术
540	C04综合病房	2024-01-17	2024-01-18	3473867	郑元良	男	50Y	取除骨折内固定装置	脂肪肝;胸腔积液	其他	陈龙	陈龙	应晓洲	跟骨内固定物取出术
541	C04综合病房	2024-01-07	2024-01-20	3474718	王绍兴	男	81Y	腹股沟脓肿	肋骨多处骨折;腰椎骨折;肺挫伤;心包积液;心脏瓣膜病;肾结石;二尖瓣反流;非风湿性三尖瓣关闭不全;肾挛缩;肾盂积水;骨囊肿;后天性肾囊肿;腰椎退行性病变;胸椎退行性病变;下肢静脉肌间血栓形成	治愈	王飞海	周磊	潘传孟	腹股沟脓肿切开引流术;开腹探查术
542	C04综合病房	2024-01-19	2024-01-20	3474768	朱天文	男	62Y	取除骨折内固定装置		其他	杨雷	周一飞	白炳力	胫骨内固定装置去除术;跟骨内固定物取出术
543	C04综合病房	2024-01-19	2024-01-21	3475294	王炳汉	男	35Y	取除骨折内固定装置	前列腺结石;肾超声检查异常	其他	杨雷	周一飞	白炳力	髌骨内固定装置去除术
544	C04综合病房	2024-01-20	2024-01-21	3475348	金雨泽	男	9Y	取除骨折内固定装置		其他	陈龙	应晓洲	应晓洲	桡骨内固定装置去除术
545	C04综合病房	2024-01-20	2024-01-21	3475350	王玉英	女	64Y	取除骨折内固定装置	脂肪肝;心功能不全;退行性主动脉瓣疾患	其他	陈龙	应晓洲	应晓洲	肩锁关节内固定物取出术
546	C04综合病房	2024-01-20	2024-01-21	3475354	丁顶立	男	25Y	取除骨折内固定装置	脂肪肝;脾大	其他	陈龙	应晓洲	应晓洲	胫骨内固定装置去除术
547	C04综合病房	2024-01-20	2024-01-21	3475355	钱靖博	男	15Y	取除骨折内固定装置		其他	陈龙	应晓洲	应晓洲	桡骨内固定装置去除术
548	C04综合病房	2024-01-15	2024-01-22	3476099	洪娒乃	女	78Y	急性化脓性胆囊炎	脓毒血症;肝功能不全;肺部感染;肝钙化灶;后天性肾囊肿;糖尿病;高血压;胸椎骨折T11/T12;肋骨骨折;多发性脑梗死;脱髓鞘性白质脑病;老年性脑萎缩;髋关节置换术后	好转	吴伟军	闻浩	叶陈敏	超声引导下胆囊穿刺引流术
549	C04综合病房	2024-01-21	2024-01-23	3476854	林娥妹	女	79Y	骨质疏松伴有病理性骨折	胸椎骨折T11/T12;腰椎骨折;尿毒症;高血压;糖尿病;肾挛缩;后天性肾囊肿;盆腔积液;肺诊断性影像异常;胸腔积液;甲状腺结节;主动脉钙化;冠状动脉粥样硬化	好转	吴伟军	闻浩	叶陈敏
550	C04综合病房	2024-01-18	2024-01-24	3477016	梁月兰	女	63Y	胆囊结石	胆总管结石;肝囊肿;骨囊肿;胸椎压缩性骨折;椎间盘膨隆;腰椎退行性病变;脂肪肝	治愈	黄和	黄和	姚志超	腹腔镜下胆囊切除术;肠粘连松解术
551	C04综合病房	2024-01-17	2024-02-03	3478547	贺猛	男	31Y	创伤性脾破裂	腹腔积血;失血性休克;小肠损伤;结肠损伤;腰椎骨折;胸腔积液;下肢静脉血栓形成	治愈	杨越涛	杨越涛	洪滉	肠系膜修补术;脾修补术;小肠浆膜修补术;回肠结肠切除术;回肠造口术;开腹探查术
552	C04综合病房	2024-01-30	2024-02-09	3479277	饶玉	女	37Y	创伤性脾破裂	腹腔积血;腰椎骨折;肌腱和肌肉损伤;后天性肾囊肿;颈椎退行性病变;腰椎间盘突出;腰椎退行性病变;胸椎退行性病变	治愈	吴伟军	吴伟军	叶陈敏	全脾切除术;腹腔冲洗检查
553	C04综合病房	2024-01-24	2024-02-09	3479305	谢建用	男	50Y	创伤性脾破裂	创伤性血气胸;眶骨骨折;创伤性膈破裂;肌腱和肌肉损伤;面部挫伤;胸腔积液	好转	杨越涛	杨越涛	洪滉	腹腔镜全脾切除术;肺修补术;膈肌修补术;腹腔冲洗检查;胸腔闭式引流术;腹壁清创术;皮肤和皮下坏死组织切除清创术
554	C04综合病房	2024-02-19	2024-03-04	3481890	应永肖	男	67Y	创伤性脾破裂	多处开放性伤口;失血性休克;腹腔积血;开放性脑挫伤;创伤性蛛网膜下腔出血;创伤性硬膜下出血;头皮血肿;肩胛骨骨折;肋骨骨折;胸椎压缩性骨折;腰椎骨折;腹膜后血肿;肺部感染	治愈	倪仲琳	黄和	姚志超	脾修补术;腹腔冲洗检查
555	C04综合病房	2024-02-29	2024-03-06	3482166	陈美英	女	65Y	创伤性脾破裂	肋骨多处骨折;十二指肠憩室;肾上腺结节性增生	治愈	杨越涛	杨越涛	杨越涛	全脾切除术;腹腔冲洗检查
556	C04综合病房	2024-03-01	2024-03-09	3482747	卢碎华	男	57Y	手术后腹痛	头皮血肿;后天性脾缺失;主动脉夹层［任何部分］;寰枢关节扭伤;骨折治疗后恢复期;胸腔积液;肋骨骨折;多发性肝囊肿;后天性肾囊肿;静脉血栓形成;颈椎术后	好转	杨越涛	杨越涛	杨越涛	腹腔穿刺引流术
557	C04综合病房	2024-02-25	2024-03-10	3482995	丁色兰	女	92Y	急性腹膜炎	盆腔包裹性积液;膀胱憩室;股骨颈骨折;耻骨骨折;输尿管扩张;肾盂扩张;后天性肾囊肿;胸腔积液;肺大疱	治愈	倪仲琳	黄和	姚志超
558	C04综合病房	2024-03-07	2024-03-13	3483616	徐进益	男	76Y	肠梗阻	2型糖尿病;肝囊肿;前列腺增生;骨折治疗后恢复期	好转	王飞海	周磊	潘传孟
559	C04综合病房	2024-03-29	2024-04-10	3491164	沈世俊	男	46Y	创伤性肝破裂	腹腔积血;肋骨多处骨折;胸腔积液	治愈	王飞海	周磊	姚志超	肝修补术;腹腔镜中转剖腹探查术;腹腔穿刺引流术
560	C04综合病房	2024-03-31	2024-04-16	3493256	朱东升	男	41Y	肛周脓肿	肛瘘;尿道损伤;膀胱造口维护;骨盆骨折	好转	吴伟军	吴伟军	吴伟军
561	C04综合病房	2024-04-01	2024-04-19	3494194	马克鉴	男	92Y	肠梗阻	急性胃扩张;胃潴留;胆囊结石;冠状动脉粥样硬化性心脏病;高血压2级;胸腔积液;股骨颈骨折;肋骨骨折;具有心脏除颤器	治愈	倪仲琳	黄和	潘传孟
562	C04综合病房	2024-04-10	2024-05-01	3498098	章近华	男	51Y	腹壁疝	肠系膜出血;创伤性腹膜后血肿;开放性肠系膜血肿;肾挫伤;创伤性肾动脉破裂;创伤性输尿管断裂;脾损伤;肋骨多处骨折;创伤性湿肺;创伤性血气胸;创伤性血胸;胸椎横突骨折;高血压2级;肝囊肿;后天性肾囊肿	治愈	杨越涛	杨越涛	张超2	腹壁疝修补术;肾静脉造影;肾动脉栓塞术;肾动脉造影术;开腹探查术;肠系膜修补术;腹膜后血肿清除术;输尿管结扎术;腹腔冲洗检查
563	C04综合病房	2024-04-23	2024-05-07	3499351	汤荣亮	男	20Y	创伤性肝破裂	肋骨骨折;气胸;肺挫伤;胸腔积液;鼻骨骨折;髂骨骨折;尺骨和桡骨下端均骨折;腹腔积液	治愈	杨越涛	杨越涛	孟伟阳	肝叶部分切除术;胸腔闭式引流术
564	C04综合病房	2024-05-03	2024-05-08	3499698	郑永生	男	54Y	单侧腹股沟直疝	附睾囊肿;后天性肾囊肿;前列腺结石;陈旧性肋骨骨折;肺诊断性影像异常	治愈	王飞海	周磊	姚志超	单侧腹股沟直疝斜疝无张力修补术
565	C04综合病房	2024-04-25	2024-05-11	3500263	汪岩松	男	69Y	肠系膜裂伤	腹腔积液;肾挫伤;头皮血肿;腰椎骨折;特发性(原发性)高血压;2型糖尿病;肾结石;脂肪肝;腰椎间盘突出	治愈	王飞海	周磊	姚志超	腹腔镜检查;肠系膜修补术;腹腔冲洗检查
566	C04综合病房	2024-04-28	2024-05-18	3502479	肖欢	男	30Y	创伤性胃破裂	创伤性小肠破裂;肠系膜动脉损伤;开放性肠系膜血肿;开放性大网膜破裂;结肠损伤;腹膜后血肿;腹腔积血;气胸;肋骨多处骨折;胸腔积液;肺气肿;肝钙化灶	治愈	杨越涛	杨越涛	孟伟阳	胃破裂修补术;开腹探查术;小肠破裂修补术;大网膜修补术;腹腔冲洗检查;腹膜后清扫术;腹腔冲洗检查;胸腔闭式引流术;胸腔闭式引流术
567	C04综合病房	2024-06-01	2024-06-15	3511482	朱文平	男	50Y	脾损伤	腹腔积液;肩胛骨骨折;肋骨骨折;陈旧性肺结核;腔隙性脑梗死;尿毒症;慢性肾衰竭;高钾血症;高血压;肾移植术后少尿	治愈	倪仲琳	黄和	潘传孟	经导管脾动脉栓塞术;脾动脉造影
568	C04综合病房	2024-06-11	2024-06-22	3513520	周洪辉	男	46Y	创伤性小肠破裂	开放性腹部异物;开放性大网膜破裂;开放性腹部损伤;肋骨骨折;液气胸;肺挫伤;颈椎间盘突出	治愈	王飞海	周磊	姚志超	小肠破裂修补术;大网膜修补术;腹腔冲洗检查;腹腔异物去除;创面封闭式负压引流术（VSD)
569	C04综合病房	2024-06-27	2024-06-28	3515446	郑崇昆	男	54Y	取除骨折内固定装置		其他	周一飞	郑亦静	郑亦静	尺骨内固定装置去除术
570	C04综合病房	2024-06-13	2024-07-05	3517815	徐福林	男	66Y	创伤性脾破裂	腹腔积血;锁骨骨折;肋骨多处骨折;创伤性气胸;内踝骨折;阑尾术后	治愈	吴伟军	吴伟军	叶孙志	腹壁切口裂开缝合术;全脾切除术;锁骨骨折切开复位钢板内固定术;开腹探查术;腹腔冲洗检查
571	C04综合病房	2024-07-11	2024-07-12	3520415	徐浩博	男	14Y	取除骨折内固定装置		其他	水小龙	水小龙	汪吉棋	锁骨内固定装置去除术
572	C04综合病房	2024-06-20	2024-07-13	3520832	汪庆良	男	64Y	胰腺损伤	肾包膜下积液;腹腔积血;胸骨骨折;肺挫伤;肺炎;气胸;肋骨多处骨折;多处挫伤;脂肪肝;肾结石;肝囊肿;十二指肠憩室	未愈	吴伟军	吴伟军	徐训政
573	C04综合病房	2024-05-13	2024-07-20	3523474	陈承彪	男	68Y	创伤性脾破裂	创伤性肠破裂;小肠系膜出血伴血肿;腹腔感染;腹腔积血;感染性休克;小肠肿瘤;失血性休克;下消化道出血;肱骨骨折;肋骨骨折;尺骨桡骨闭合性骨折;手术后败血症;腹壁切口疝;肾积水伴肾输尿管结石;脂肪肝;多发性肝囊肿;静脉血栓形成	治愈	王飞海	周磊	洪滉	小肠破裂修补术;全脾切除术;气管切开异物取出术;肱骨骨折切开复位术;小肠部分切除术;腹腔镜中转剖腹探查术;腹腔冲洗检查;肠系膜修补术;关节软骨修复术;腹腔冲洗检查;桡神经探查术;桡骨植骨术
574	C04综合病房	2024-07-21	2024-07-22	3524303	章亚军	男	33Y	单侧腹股沟斜疝	肺诊断性影像检查的异常所见;骨折治疗后恢复期;脂肪肝	治愈	杨越涛	杨越涛	叶陈敏	腹腔镜下单侧腹股沟斜疝无张力修补术
575	C04综合病房	2024-07-21	2024-07-25	3525506	郑英龙	男	70Y	腹股沟斜疝	腹股沟术后;多处挫伤;肩胛骨骨折;手软组织异物残留;肺大疱;坠积性肺炎;颈椎退行性病变;颈椎间盘突出;骨质增生	治愈	杨越涛	杨越涛	叶陈敏	腹腔镜下单侧腹股沟斜疝无张力修补术
576	C04综合病房	2024-07-18	2024-07-27	3526118	陈雨	男	21Y	肠系膜丛损伤	小肠损伤;腹腔积液;肋骨骨折;肾上腺结节性增生	好转	吴伟军	叶孙志	白炳隆
577	C04综合病房	2024-07-11	2024-07-29	3526908	刘敏	女	21Y	肝挫伤	肱骨骨折;腹腔积液;肺挫伤;肾结石	好转	王飞海	周磊	洪滉	肱骨骨折切开复位钢板内固定术;骨移植术
578	C04综合病房	2024-07-22	2024-07-30	3527058	金爱兰	女	63Y	脾损伤	腹腔积液;肋骨骨折;后天性肾囊肿;肾结石;脂肪肝;高血压2级;2型糖尿病	治愈	王飞海	周磊	洪滉
579	C04综合病房	2024-05-30	2024-08-05	3529291	谭明山	男	58Y	肝挫伤	肾挫伤;肾出血;创伤性肾血肿;腹腔积血;尿道损伤;创伤性腹膜后血肿;腹膜后感染;多发性骨盆骨折;髂骨骨折;骶骨骨折;耻骨骨折;肋骨骨折;创伤性气胸;创伤性湿肺;胸腔积液;掌骨骨折;腰椎骨折;手术后恢复期;肾结石;胆囊息肉	治愈	王飞海	周磊	洪滉	肝修补术;肾动脉栓塞术;髂动脉造影;经导管髂内动脉栓塞术;骨盆骨折切开复位钢板内固定术;腹腔穿刺引流术
580	C04综合病房	2024-08-01	2024-08-11	3531685	黄万祥	男	45Y	创伤性胸腔积液	头皮血肿;上颌窦骨折;颧弓骨折;眶骨骨折;视神经损伤;肺部感染;胸腔积液;三根肋骨骨折不伴第一肋骨骨折;肌腱和肌肉损伤;脾术后	治愈	吴伟军	吴伟军	白炳隆
581	C04综合病房	2024-07-29	2024-08-15	3533354	陈宣有	男	60Y	创伤性脾破裂	腹腔积血;肝挫伤;硬脑膜下积液;头皮血肿;上颌骨骨折;鼻骨骨折;鼻中隔骨折;肋骨骨折;胸腔积液;牙龈开放性损伤;多处挫伤;肺不张;肺气肿;肺大疱;上肢皮肤裂伤;下肢静脉肌间血栓形成;脂肪瘤	治愈	王飞海	周磊	洪滉	全脾切除术;开腹探查术;腹腔冲洗检查
582	C04综合病房	2024-08-14	2024-08-15	3533374	上官陈续	男	7Y	鼻骨骨折		好转	黄赛瑜	凡启军	詹翔	鼻骨折开放性复位术
583	C04综合病房	2024-08-10	2024-08-24	3536902	李笑妹	女	81Y	肱骨骨折	肺部感染;胸腔积液;2型糖尿病;骨折治疗后恢复期;低蛋白血症	治愈	吴伟军	吴伟军	吴伟军	肱骨骨折切开复位钢板内固定术
584	C04综合病房	2024-08-29	2024-09-02	3540170	季乐兴	男	57Y	胆囊结石伴急性化脓性胆囊炎	肠结石;肾结石;脂肪肝;腰椎骨折L2	好转	倪仲琳	倪仲琳	潘传孟	腹腔镜下胆囊切除术
585	C04综合病房	2024-09-04	2024-09-11	3543498	邵传香	女	66Y	胆囊结石伴坏疽性胆囊炎	局限性腹膜炎;胸腔积液;骨折治疗后的随诊检查;高血压;2型糖尿病;陈旧性肋骨骨折	治愈	倪仲琳	姚志超	潘传孟	腹腔镜下胆囊切除术
586	C04综合病房	2024-08-29	2024-09-14	3544637	丁顺才	男	43Y	创伤性脾破裂	腹腔积液;四根以上肋骨骨折不伴第一肋骨骨折;创伤性胸腔积液;腰椎骨折;颈椎间盘疾患	治愈	杨越涛	闻浩	徐训政	腹腔镜全脾切除术;腹腔冲洗检查
587	C04综合病房	2024-08-28	2024-09-15	3544890	戴光明	男	70Y	肝挫伤	头皮血肿;腰椎骨折;肺挫伤;后天性肾囊肿;椎体感染;腰椎间盘突出;腰椎间盘突出;外踝骨折	治愈	王飞海	王飞海	张超2
588	C04综合病房	2024-10-01	2024-10-06	3552843	夏操芳	男	61Y	不完全性肠梗阻	血小板减少;脾术后;肠破裂;肺诊断性影像检查的异常所见;胆囊结石;前列腺钙化灶;髂骨骨折;陈旧性耻骨骨折;内踝骨折	治愈	吴伟军	吴伟军	吴伟军
589	C04综合病房	2024-10-09	2024-10-10	3553953	赵程斌	男	16Y	鼻骨骨折		治愈	高金建	凡启军	陈如如	鼻骨折闭合性复位术
590	C04综合病房	2024-10-07	2024-10-12	3554645	周春花	女	83Y	肠梗阻	腰椎骨折;后天性肾囊肿;高血压;糖尿病;冠状动脉粥样硬化性心脏病	治愈	王飞海	王飞海	张超2
591	C04综合病房	2024-10-16	2024-10-22	3558792	南冰户	男	38Y	胆囊结石伴慢性胆囊炎急性发作	黄疸;贫血;锁骨骨折;胸腔积液;肝钙化灶;脾大	治愈	吴伟军	吴伟军	潘达2	腹腔镜下胆囊切除术
592	C04综合病房	2024-10-12	2024-10-26	3560229	张小肥	女	39Y	肠破裂	腹腔积液;胸腔积液;上颌骨骨折;多处挫伤;胆囊息肉;肺诊断性影像异常	治愈	吴伟军	吴伟军	吴伟军	小肠破裂修补术;腹腔镜中转剖腹探查术;小肠排列术;腹腔冲洗检查
593	C04综合病房	2024-10-15	2024-10-27	3560562	欧阳建军	男	57Y	创伤性脾破裂	创伤性胰腺破裂;腹腔积血;气胸;肋骨骨折;肺挫伤;肾结石;前列腺钙化灶;多发性脑梗死	治愈	张伟2	黄和	洪滉	全脾切除术;开腹探查术;胰尾修补术;腹腔冲洗检查
594	C04综合病房	2024-10-31	2024-10-31	3562488	刘洪蓉	女	73Y	骨质疏松	骨折术后恢复期	好转	汤骏	汤骏	王贤亮
595	C04综合病房	2024-11-06	2024-11-11	3566744	廖大俊	男	74Y	肝癌伴出血	腹腔积血;胆囊结石;黄疸;腹腔积液;脾大;膀胱结石;骨折治疗后恢复期;高血压;2型糖尿病	未愈	王飞海	王飞海	姚志超
596	C04综合病房	2024-09-29	2024-11-12	3567241	刘成教	男	63Y	直肠恶性肿瘤	粘连性肠梗阻;手术后伤口裂开;腹壁切口疝;肺部感染;特发性(原发性)高血压;后天性肾囊肿;肺肿物;陈旧性肋骨骨折;主动脉钙化;前列腺钙化灶;心包积液;胸腔积液	治愈	倪仲琳	倪仲琳	潘传孟	乙状结肠切除术;经尿道输尿管支架置入术;腹壁清创术;开腹探查术;腹壁切口裂开缝合术
597	C04综合病房	2024-11-08	2024-11-13	3567669	丽林花	女	76Y	肠梗阻	高血压病3级（高危）;2型糖尿病;胆囊结石;乳腺术后;骨折术后	治愈	倪仲琳	倪仲琳	潘传孟
598	C04综合病房	2024-11-06	2024-11-15	3568241	项美翠	女	55Y	回盲部肿物	腹壁疝;马蹄形肾;肺肿物;肋骨骨折	好转	吴伟军	吴伟军	吴伟军	胃镜检查
599	C04综合病房	2024-11-02	2024-11-20	3570453	徐爱英	女	79Y	单侧嵌顿性腹股沟疝伴梗阻	肠坏死;低蛋白血症;贫血;系统性红斑狼疮;肺部感染;骨质疏松;陈旧性肋骨骨折;腰椎压缩性骨折;特发性(原发性)高血压;下肢动脉粥样硬化;后天性肾囊肿;肺肿物;主动脉钙化	治愈	杨越涛	杨越涛	徐训政	腹腔镜下单侧腹股沟斜疝无张力修补术;腹腔镜中转剖腹探查术;小肠部分切除术;小肠切开减压术
600	C04综合病房	2024-11-14	2024-11-23	3571501	王顺利	男	53Y	肝挫伤	肋骨多处骨折;男性盆腔炎;胸腔积液;肺肿物;肾结石;前列腺钙化灶	治愈	倪仲琳	倪仲琳	潘传孟
601	C04综合病房	2024-11-30	2024-12-09	3577590	滕胜和	男	37Y	急性坏疽性阑尾炎伴穿孔伴弥漫性腹膜炎	髂窝脓肿;腹腔积液;慢性肝病;肝硬化;脾大;肾结石;骨折术后;胆囊壁肌增生	治愈	王飞海	王飞海	姚志超	腹腔镜下阑尾切除术;髂窝脓肿切开引流术;腹腔冲洗检查
602	C04综合病房	2024-11-22	2024-12-11	3578731	许则施	男	59Y	创伤性胰腺破裂	胰瘘;腹腔积血;腹直肌断裂;腹壁疝;肋骨骨折;肺肿物;甲状腺结节;腹腔积液;腹部损伤;低蛋白血症	好转	杨越涛	倪孔海	徐训政	腹腔穿刺引流术;胸腔穿刺术
603	C04综合病房	2024-12-06	2024-12-15	3580047	金玉珠	女	79Y	股疝	骨折术后;主动脉钙化;甲状腺结节;肺肿物	治愈	王飞海	王飞海	姚志超	单侧股疝无张力修补术
604	C05疼痛科	2023-12-20	2024-01-03	3466417	徐珏芬	女	70Y	胫骨平台伴腓骨骨折	膝的其他和未特指部位的扭伤和劳损;膝关节外侧副韧带损伤;半月板损伤;膝关节积液;骨折治疗后恢复期	治愈	翁益民	翁益民	王特	胫骨骨折切开复位钢板内固定术
605	C05疼痛科	2023-12-26	2024-01-03	3466422	袁维岗	男	44Y	带状疱疹后遗症	声带麻痹;手术后随诊检查;骨折术后;颈椎术后;肾结石;前列腺结石	好转	许峰	许峰	刘世文
606	C05疼痛科	2023-12-16	2024-01-03	3466843	陈秀凤	女	76Y	骨质疏松伴有病理性骨折	脊柱骨折;高血压	未愈	占恭豪	占恭豪	何伶俐	脊髓和神经根粘连的松解术;连续硬膜外阻滞术
607	C05疼痛科	2024-01-03	2024-01-06	3467464	陈秀凤	女	76Y	骨质疏松伴有病理性骨折	脊柱骨折;高血压	未愈	占恭豪	占恭豪	何伶俐
608	C05疼痛科	2024-01-09	2024-01-14	3471342	林生	男	37Y	取除骨折内固定装置	脂肪肝;前列腺增生;前列腺结石	其他	翁益民	翁益民	王特	踝关节内固定装置去除术
609	C05疼痛科	2024-01-13	2024-01-17	3473030	姜成琴	女	72Y	骨质疏松伴有病理性骨折	高血压	好转	占恭豪	王佩芳	何伶俐
610	C05疼痛科	2024-01-09	2024-01-18	3473696	潘飞云	女	48Y	肩锁关节脱位	肩胛骨骨折	好转	翁益民	翁益民	王特	肩锁关节脱位切开复位内固定术
611	C05疼痛科	2024-01-16	2024-01-22	3475623	陈奕豪	男	13Y	取除骨折内固定装置		其他	翁益民	翁益民	王特	股骨内固定装置去除术
612	C05疼痛科	2024-01-16	2024-01-22	3475625	肖高博	男	12Y	取除骨折内固定装置		其他	翁益民	翁益民	王特	胫骨内固定装置去除术;皮肤瘢痕切除术
613	C05疼痛科	2024-01-14	2024-01-22	3475660	章丽华	女	60Y	双踝骨折	冠状动脉粥样硬化性心脏病;肺诊断性影像异常;下肢静脉曲张	好转	翁益民	翁益民	王特	踝关节骨折切开复位螺钉内固定术
614	C05疼痛科	2024-03-19	2024-03-20	3485341	陈永锡	男	64Y	为肿瘤化学治疗疗程	肺恶性肿瘤;肺诊断性影像异常;肺气肿;胸腔积液;不安腿综合征;肋骨骨折	好转	吴剑	朱宝玲	林瑞芳	静脉注射化疗药物;静脉注射免疫制剂治疗
615	C05疼痛科	2024-03-17	2024-03-23	3485842	苏定朝	男	57Y	颈椎病	桡骨骨折;高血压;高脂血症;肺诊断性影像异常;颈动脉硬化	治愈	许峰	许峰	田心毅	椎间盘镜下后入路颈椎间盘切除术;脊髓和神经根粘连的松解术;椎间盘镜下椎管成形术;椎间盘射频消融术
616	C05疼痛科	2024-03-16	2024-03-25	3486439	林汝香	女	85Y	骨质疏松伴有病理性骨折	腰椎压缩性骨折;椎管狭窄	好转	占恭豪	王佩芳	黄茜茜	周围神经麻醉药注射，为了镇痛
617	C05疼痛科	2024-03-24	2024-03-30	3487884	董爱媚	女	85Y	骨质疏松伴有病理性骨折	腰椎间盘突出;冠状动脉粥样硬化性心脏病;特发性(原发性)高血压	好转	占恭豪	王佩芳	黄茜茜
618	C05疼痛科	2024-04-06	2024-04-09	3490928	吴理秋	男	80Y	腰椎间盘突出	腰椎骨折;神经痛;高血压2级;2型糖尿病;腹股沟术后;下肢动脉粥样硬化闭塞症	好转	占恭豪	王佩芳	黄茜茜	周围神经阻滞术
619	C05疼痛科	2024-04-07	2024-04-10	3491316	王莲英	女	78Y	骨质疏松	脊柱骨折;冠状动脉粥样硬化性心脏病;冠状动脉支架植入后状态;高血压2级	好转	占恭豪	王佩芳	黄茜茜	关节治疗性物质注射
620	C05疼痛科	2024-04-13	2024-04-16	3493124	黄永木	男	71Y	骨质疏松伴有病理性骨折	类风湿性关节炎伴肺间质纤维化;支气管扩张(症);高血压;2型糖尿病	好转	许峰	吴彬彬	何伶俐
621	C05疼痛科	2024-04-13	2024-04-16	3493227	夏芳妹	女	61Y	恶性肿瘤免疫治疗	宫颈恶性肿瘤;胃术后;肝继发恶性肿瘤;腰椎骨折;2型糖尿病;高血压;高脂血症;锁骨下动脉粥样硬化;下肢动脉粥样硬化;肺肿物;后天性肾囊肿;肾盂积水，其他的;胆囊切除术后状态	好转	吴剑	朱宝玲	孙霜霜	静脉注射免疫制剂治疗
622	C05疼痛科	2024-04-14	2024-04-17	3493536	郑小文	女	64Y	骨质疏松伴有病理性骨折	胸椎压缩性骨折;高血压;肺大疱;肝囊肿	好转	许峰	许峰	田心毅
623	C05疼痛科	2024-04-14	2024-04-20	3494303	雷兰菊	女	68Y	骨质疏松伴有病理性骨折		好转	许峰	许峰	田心毅
624	C05疼痛科	2024-04-12	2024-04-20	3494350	郑月龙	男	55Y	胫骨平台骨折	膝关节退行性病变;脂肪肝;前列腺增生;心功能不全;前列腺结石	好转	王鉴顺	王鉴顺	王贤亮	胫骨骨折切开复位钢板内固定术;关节软骨修复术;胫骨植骨术
625	C05疼痛科	2024-04-15	2024-04-20	3494353	胡宸硕	男	7Y	肱骨近端骨折		治愈	赵友明	柯陈荣	汪吉棋	肱骨骨折切开复位钢针内固定术;关节软骨修复术
626	C05疼痛科	2024-04-20	2024-04-23	3495531	黄金凤	女	63Y	骨质疏松伴有病理性骨折	脊柱骨折;甲状腺功能亢进症	好转	占恭豪	王佩芳	黄茜茜
627	C05疼痛科	2024-04-20	2024-04-24	3495746	潘爱英	女	64Y	骨质疏松伴有病理性骨折	高血压2级;甲状腺功能减退症;支气管哮喘;胃食管反流	好转	占恭豪	王佩芳	黄茜茜
628	C05疼痛科	2024-04-21	2024-04-25	3496076	胡彩凤	女	77Y	骨质疏松伴有病理性骨折	胸椎压缩性骨折;高血压;2型糖尿病;颈椎病	好转	占恭豪	王佩芳	黄茜茜
629	C06肿瘤放化疗、神经康复	2023-12-24	2024-01-06	3467472	陈春英	女	64Y	运动障碍	环性心境人格;言语障碍;进食障碍;特定性运动功能发育障碍;涉及使用其他康复操作的医疗;脑梗死;肺部感染;肺诊断性影像异常;帕金森病;特发性(原发性)高血压;心室过早除极;脂肪肝;肾结石;肱骨骨折	好转	刘宝华	商萍	戴威	运动训练;电动起立床训练;关节松动法;作业疗法
630	C06肿瘤放化疗、神经康复	2023-12-13	2024-01-06	3467804	胡昭豹	男	68Y	运动障碍	进食障碍;特定性运动功能发育障碍;认知障碍;神经源性肠;神经源性膀胱;特定性运动功能发育障碍;涉及使用其他康复操作的医疗;慢性硬膜下血肿;肱骨骨折;特发性(原发性)高血压;脑挫伤;老年性脑萎缩;脑梗死后遗症;肺诊断性影像异常;胸腔积液;高脂血症;肋骨骨折;前列腺增生	好转	刘宝华	商萍	戴威	电动起立床训练;针灸;运动训练;低频脉冲电治疗;关节松动法;作业疗法
631	C06肿瘤放化疗、神经康复	2023-12-25	2024-01-07	3468238	苏光库	男	66Y	为肿瘤化学治疗疗程	直肠恶性肿瘤;肝继发恶性肿瘤;回肠造口状态;化疗后骨髓抑制;频发性房性期前收缩;骨折术后;门静脉高压;脾大;前列腺增生;肺结节病;肺气肿	好转	陈文俊	张曦	张曦	静脉注射化疗药物;静脉输液港植入术;静脉穿刺术
632	C06肿瘤放化疗、神经康复	2024-01-06	2024-01-14	3471351	袁少玉	女	65Y	运动障碍	脑内出血;特定性运动功能发育障碍;特定性运动功能发育障碍;膝关节僵硬;偏瘫;涉及使用其他康复操作的医疗;脑内出血;多发性脑梗死;老年性脑萎缩;上颌窦囊肿;特发性(原发性)高血压;2型糖尿病;乙型肝炎肝硬化;胸椎骨折T11/T12;椎间盘变性，其他特指的;腰椎退行性病变	好转	刘宝华	商萍	戴威	运动训练;电动起立床训练;行走和步态训练;作业疗法;针灸;低频脉冲电治疗;超声疗法;中药蒸汽浴治疗;平衡功能训练;超短波短波疗法
633	C06肿瘤放化疗、神经康复	2023-12-20	2024-01-17	3473021	高珍云	女	67Y	运动障碍	进食障碍;轻度认知障碍;言语障碍;膝关节僵硬;累及神经和肌肉骨骼系统症状和体征;涉及使用其他康复操作的医疗;颅内损伤伴有延长的昏迷;硬膜外血肿;颞骨骨折;脑挫伤;腓骨骨折;胫骨骨折;甲状腺功能减退症;骨质疏松;肺部感染	好转	刘宝华	商萍	吕德钊	日常生活动作训练;低频脉冲电治疗;电动起立床训练;运动训练;语言治疗;物理疗法;作业疗法;其他控制气压和空气成分的疗法
634	C06肿瘤放化疗、神经康复	2023-12-30	2024-01-18	3473704	夏家权	男	83Y	肺恶性肿瘤	全身性广泛继发恶性肿瘤;颅内占位性病变;胸椎压缩性骨折;躯干部血管瘤;腓总神经损伤;特发性(原发性)高血压;高血压性心脏病;腔隙性脑梗死;胆囊结石;颈动脉硬化;下肢动脉粥样硬化;前列腺增生;前列腺结石;骨质疏松;锁骨下动脉粥样硬化;恶性肿瘤靶向治疗	未愈	陈文俊	张曦	张曦	分子靶向治疗
635	C06肿瘤放化疗、神经康复	2024-01-06	2024-01-19	3474277	曹光伟	男	50Y	恶性肿瘤免疫治疗	肺恶性肿瘤;脊柱继发恶性肿瘤;颈椎骨折C7;2型糖尿病;窦性心动过速;后天性肾囊肿;肾结石	好转	陈文俊	陈文俊	吴聪聪	静脉注射免疫制剂治疗
636	C06肿瘤放化疗、神经康复	2024-02-26	2024-02-27	3481081	陈永锡	男	64Y	手术后恶性肿瘤化学治疗	恶性肿瘤免疫治疗;肺诊断性影像异常;肺气肿;胸腔积液;不安腿综合征;肋骨骨折;肺恶性肿瘤;肺\[部分\]后天性缺失	好转	吴剑	吴剑	孙霜霜	静脉注射化疗药物;静脉注射免疫制剂治疗
637	C06肿瘤放化疗、神经康复	2024-02-21	2024-03-12	3483305	杨阿玉	女	61Y	肺恶性肿瘤	骨继发恶性肿瘤;肺结节病;2型糖尿病;后天性肾囊肿;肾结石;中度贫血;下肢动脉粥样硬化;肋骨骨折;恶性肿瘤靶向治疗	治愈	吴剑	朱宝玲	林瑞芳	分子靶向治疗
638	C06肿瘤放化疗、神经康复	2024-03-04	2024-03-22	3485740	郑经会	男	65Y	运动障碍	进食障碍;构音障碍;特定性运动功能发育障碍;涉及使用其他康复操作的医疗;脑外伤恢复期;骨折治疗后恢复期;脑挫伤;腰骶横突骨折;颈椎间盘突出;椎骨病变;椎间盘移位，其他特指的;肝囊肿;肺部感染;特发性(原发性)高血压;窦性心动过速	好转	刘宝华	商萍	金翩翩	运动训练;日常生活动作训练;低频脉冲电治疗
639	C06肿瘤放化疗、神经康复	2024-03-22	2024-03-31	3488335	夏芳妹	女	61Y	恶性肿瘤免疫治疗	放射性肠炎;宫颈恶性肿瘤;病理性骨折，不可归类在他处者;腰椎继发恶性肿瘤;十二指肠术后;肝继发恶性肿瘤;慢性丙型病毒性肝炎;2型糖尿病;高脂血症;锁骨下动脉粥样硬化;下肢动脉粥样硬化;肺诊断性影像异常;后天性肾囊肿;肾盂积水，其他的;输尿管扩张;胆囊切除术后状态	好转	吴剑	朱宝玲	林瑞芳	腰椎穿刺术;静脉注射免疫制剂治疗
640	C06肿瘤放化疗、神经康复	2023-12-30	2024-04-09	3490727	王康	男	42Y	颅骨缺损修补	轻度认知障碍;特定性运动功能发育障碍;硬膜下血肿;创伤性蛛网膜下腔出血;硬脑膜下积液;肋骨骨折;锁骨骨折;髂骨骨折;肩胛骨骨折;腰椎骨折;肺钙化;肝钙化灶;颈椎间盘变性，其他的;颈椎间盘突出;阵发性室上性心动过速	其他	刘宝华	商萍	黄世园	颅骨骨瓣修补术;运动训练;认知功能评定;手功能评估;语言障碍训练
641	C06肿瘤放化疗、神经康复	2024-04-10	2024-04-18	3493826	徐松平	男	62Y	运动障碍	皮肤感觉障碍，其他和未特指的;膝关节僵硬;特定性运动功能发育障碍;涉及使用康复操作的医疗;脑出血后遗症;肋骨多处骨折;胸腔积液;肺不张;肋骨骨折;高血压2级;2型糖尿病;下肢动脉粥样硬化;腰椎退行性病变;腰椎间盘突出;后天性肾囊肿	好转	刘宝华	商萍	吕德钊	低频脉冲电治疗;物理疗法;作业疗法;运动训练;行走和步态训练
642	C06肿瘤放化疗、神经康复	2024-03-26	2024-04-29	3497418	李仁第	女	85Y	脑梗死	运动障碍;皮肤感觉障碍;吞咽困难;言语障碍;特定性运动功能发育障碍;涉及使用康复操作的医疗;肺部感染;胸腔积液;高血压2级;高血压性心脏病;心功能不全;心房颤动;动脉粥样硬化;下肢动脉粥样硬化;胫前动脉闭塞;2型糖尿病;出血性内痔;甲状腺结节;胆囊结石;肋骨骨折;肺肿物	好转	刘宝华	刘宝华	吕德钊	低频脉冲电治疗;针灸;运动训练;语言治疗
643	C06肿瘤放化疗、神经康复	2024-04-21	2024-05-06	3499239	刘良静	男	63Y	鼻咽恶性肿瘤	淋巴结继发恶性肿瘤;骨继发恶性肿瘤;第二颈椎骨折;为肿瘤化学治疗疗程;恶性肿瘤靶向治疗;颈椎间盘突出;上颌窦囊肿;脂肪肝;肝病;前列腺增生;前列腺结节;甲状腺囊肿;甲状腺结节;睾丸鞘膜积液	好转	陈文俊	张曦	张曦	静脉注射化疗药物;分子靶向治疗
644	C06肿瘤放化疗、神经康复	2024-05-10	2024-05-23	3501579	张宗温	女	87Y	运动障碍	由于活动能力降低而需要帮助;涉及使用康复操作的医疗;短暂性脑缺血发作;低钾血症;肝功能不全;高血压2级;老年性脑萎缩;动脉粥样硬化;动脉狭窄;肺诊断性影像异常;肋骨多处骨折;错构瘤病	好转	刘宝华	刘宝华	吕德钊	运动训练;物理疗法;低频脉冲电治疗;作业疗法
645	C06肿瘤放化疗、神经康复	2024-05-23	2024-06-03	3507601	周吾娒	男	78Y	运动障碍	吞咽困难;言语障碍;由于活动能力降低而需要帮助;涉及使用康复操作的医疗;短暂性脑缺血发作;动脉粥样硬化;下肢动脉粥样硬化;多发性脑梗死;2型糖尿病;前列腺恶性肿瘤;腰椎骨折;肺肿物;肾错构瘤;肺气肿;肾结石;肺部感染;泌尿道感染	好转	刘宝华	商萍	吕德钊	日常生活动作训练;运动训练;低频脉冲电治疗;作业疗法;物理疗法
646	C06肿瘤放化疗、神经康复	2024-04-02	2024-06-30	3516036	吕阿菊	女	84Y	脑梗死	偏瘫;运动障碍;皮肤感觉障碍;吞咽困难;运动障碍;涉及使用康复操作的医疗;颈动脉硬化;下肢静脉肌间血栓形成;下肢动脉粥样硬化;心房颤动;高血压2级;2型糖尿病;股骨粗隆间骨折	好转	刘宝华	刘宝华	吕德钊	物理疗法;运动训练;低频脉冲电治疗;针灸;作业疗法
647	C06肿瘤放化疗、神经康复	2024-06-17	2024-07-06	3518131	尤志叶	女	73Y	脑梗死	肺部感染;运动障碍;运动障碍;躯体形式障碍;环性心境人格;受压区压疮;涉及使用康复操作的医疗;下肢动脉粥样硬化;2型糖尿病;高血压2级;高脂血症;高尿酸血症;骨折术后;甲状腺术后;泌尿道感染	好转	刘宝华	商萍	胡晓晓	运动训练;电动起立床训练;日常生活动作训练;低频脉冲电治疗;其他控制气压和空气成分的疗法;心脏再训练;超声波治疗;作业疗法
648	C06肿瘤放化疗、神经康复	2024-06-30	2024-07-07	3518414	徐松平	男	62Y	偏瘫	运动障碍;膝关节僵硬;肩手综合征;运动障碍;涉及使用康复操作的医疗;脑出血恢复期;高血压2级;2型糖尿病;下肢动脉粥样硬化;腰椎间盘突出;肋骨骨折	好转	刘宝华	商萍	胡晓晓	运动训练;关节松动法;平衡功能训练;行走和步态训练;作业疗法;低频脉冲电治疗;针灸
649	C06肿瘤放化疗、神经康复	2024-06-22	2024-07-09	3519415	虞位荣	男	84Y	偏瘫	运动障碍;运动障碍;出血性脑梗死;颈动脉狭窄;下肢静脉血栓形成;下肢动脉粥样硬化;腰椎骨折;冠状动脉粥样硬化性心脏病;高血压2级;老年性脑萎缩;前列腺增生;腹股沟斜疝;肾结石;腰椎间盘突出;骨质疏松;心房颤动;泌尿道感染;大脑中动脉狭窄	好转	刘宝华	商萍	吕德钊	低频脉冲电治疗;针灸;运动训练;物理疗法;日常生活动作训练;作业疗法
650	C06肿瘤放化疗、神经康复	2024-05-29	2024-07-13	3520529	叶云芳	男	68Y	脑梗死	运动障碍;运动障碍;吞咽困难;颈动脉狭窄;陈旧性肋骨骨折;颈椎退行性病变;肺肿物;下肢静脉血栓形成;单纯性肾囊肿;肝钙化灶;膀胱结石;肾结石;慢性咽炎;前列腺增生;慢性咽炎;前列腺结石	好转	刘宝华	商萍	戴威	经尿道膀胱镜膀胱激光碎石术;语言治疗;针灸;运动训练;作业疗法;物理疗法;电动起立床训练
651	C06肿瘤放化疗、神经康复	2024-07-19	2024-07-22	3524351	徐莉敏	女	54Y	颈椎间盘突出	甲状腺结节;肺诊断性影像检查的异常所见;骨折治疗后恢复期;慢性乙型病毒性肝炎	未愈	刘宝华	商萍	覃燕青
652	C06肿瘤放化疗、神经康复	2024-05-08	2024-07-23	3524693	王泽统	男	15Y	创伤性脾破裂	腹腔积血;肺挫伤;四根以上肋骨骨折不伴第一肋骨骨折;肩胛骨骨折;胸椎横突骨折;腰椎骨折;髋臼骨折;股骨骨折;耻骨骨折;多处挫伤;腓总神经损害;胫神经损伤;运动障碍;皮肤感觉障碍;膝关节僵硬;运动障碍;涉及使用康复操作的医疗	治愈	刘宝华	商萍	金翩翩	全脾切除术;腹腔冲洗检查;股骨骨折切开复位钢板内固定术;肺病损切除术;运动训练;针灸;低频脉冲电治疗;电动起立床训练
653	C06肿瘤放化疗、神经康复	2024-07-06	2024-08-06	3529603	谢选枕	男	98Y	股骨粗隆间骨折	脑梗死;硬脑膜下积液;偏瘫;运动障碍;言语障碍;累及神经和肌肉骨骼系统症状和体征;运动障碍;涉及使用康复操作的医疗;肺部感染;胸腔积液;肺大疱;泌尿道感染;心功能不全;心房颤动;肝功能检查的异常结果;动脉粥样硬化;前列腺增生;胆囊结石;肾结石	未愈	刘宝华	刘宝华	胡晓晓
654	C06肿瘤放化疗、神经康复	2024-06-21	2024-08-18	3534282	李云勤	女	46Y	胸椎骨折	胸部脊髓损伤;锁骨骨折;桡骨远端骨折;手骨折;创伤性血气胸;脑梗死;脑挫伤;腰椎骨折;肩胛骨骨折;肋骨骨折;颅底骨折;创伤性蛛网膜下腔出血;头皮裂伤;肺挫伤;肺部感染;下肢静脉肌间血栓形成;低蛋白血症;肝损害;累及神经和肌肉骨骼系统症状和体征;运动障碍;功能性吞咽困难	治愈	刘宝华	刘宝华	覃燕青	胸椎骨折切开复位内固定术;桡骨骨折切开复位钢板内固定术;胸腔穿刺术;关节运动训练;低频脉冲电治疗;物理疗法;其他控制气压和空气成分的疗法;温针灸治疗;胸腔穿刺术
655	C06肿瘤放化疗、神经康复	2024-08-09	2024-08-26	3537432	马青春	男	49Y	肾积水伴肾输尿管结石	肋骨多处骨折;胸腔积液;前列腺钙化灶;脂肪瘤;头皮血肿	治愈	竺海波	虞海峰	刘翔	腹腔镜下输尿管切开取石术
656	C06肿瘤放化疗、神经康复	2024-08-05	2024-08-28	3538347	季如强	男	76Y	运动障碍	吞咽困难;言语障碍;运动障碍;涉及使用康复操作的医疗;多发性脑梗死;阿尔茨海默病;肺部感染;颈动脉硬化;脑血管狭窄;下肢动脉粥样硬化;肢体动脉硬化性闭塞症;低钠血症;室性期前收缩;脑术后;肋骨骨折;后天性肾囊肿;前列腺结石;肝功能不全;锁骨下动脉粥样硬化;椎动脉粥样硬化	好转	刘宝华	刘宝华	吕德钊	温针灸治疗;低频脉冲电治疗;物理疗法;运动训练;电动起立床训练;日常生活动作训练
657	C06肿瘤放化疗、神经康复	2024-07-15	2024-08-31	3539693	潘太初	男	76Y	脑内出血	运动障碍;皮肤感觉障碍;吞咽困难;言语障碍;运动障碍;涉及使用其他康复操作的医疗;肺部感染;胸腔积液;特发性(原发性)高血压;2型糖尿病;筛窦炎;蝶窦炎;肋骨骨折	好转	刘宝华	商萍	戴威	运动训练;作业疗法;语言治疗;物理疗法;电动起立床训练;重复经颅磁刺激[rTMS]
658	C06肿瘤放化疗、神经康复	2024-08-19	2024-09-10	3543116	诸莲华	女	67Y	脑梗死	吞咽困难;运动障碍;运动障碍;言语障碍;神经源性膀胱;神经源性肠;认知障碍;涉及使用康复操作的医疗;多处Ⅳ期压疮;高血压病3级（极高危）;2型糖尿病;癫痫;精神分裂症;脑梗死后遗症;泌尿道感染;低蛋白血症;胆囊结石;后天性肾囊肿;下肢动脉粥样硬化;甲状腺结节;骨折术后	好转	刘宝华	刘宝华	覃燕青	运动训练;低频脉冲电治疗;电动起立床训练;语言障碍训练;作业疗法;其他控制气压和空气成分的疗法;温针灸治疗
659	C06肿瘤放化疗、神经康复	2024-09-05	2024-09-21	3547111	单玉林	男	64Y	肾挫伤	创伤性肾周血肿;腹腔积液;肋骨多处骨折;胸腔积液;脾损伤	好转	竺海波	虞海峰	刘翔
660	C06肿瘤放化疗、神经康复	2024-09-24	2024-09-28	3549809	马青春	男	49Y	肾结石	肋骨骨折	治愈	竺海波	虞海峰	刘翔	输尿管支架取出术;经皮肾镜碎石术（PCNL）
661	C06肿瘤放化疗、神经康复	2024-09-21	2024-09-29	3550516	陈伟	男	34Y	截瘫	运动障碍;陈旧性胸椎骨折;陈旧性腰椎骨折;腰椎间盘突出;陈旧性胫骨平台骨折;精神分裂症;窦性心动过速;下肢静脉肌间血栓形成;高脂血症;脂肪肝;肝囊肿;胆囊结石;肝钙化灶;高尿酸血症;甲状腺结节;肾结石;后天性肾囊肿	好转	刘宝华	商萍	戴威	关节运动训练;作业疗法;电动起立床训练;其他物理治疗;温针灸治疗;运动训练
662	C06肿瘤放化疗、神经康复	2024-09-27	2024-10-01	3551352	蒋燕燕	女	27Y	躯体形式障碍	乳房纤维囊性乳腺病;乳腺术后;房性期前收缩[房性早搏];室性期前收缩;肺诊断性影像检查的异常所见;子宫内膜息肉;外踝骨折	好转	刘宝华	刘宝华	胡晓晓
663	C06肿瘤放化疗、神经康复	2024-09-29	2024-10-20	3557882	金招弟	女	90Y	运动障碍	膝关节僵硬;运动障碍;涉及使用康复操作的医疗;髋臼骨折;股骨头骨折;髋关节置换术后;女性盆腔血肿;特发性(原发性)高血压;高血压性心脏病;冠状动脉粥样硬化性心脏病;心房颤动;多发性脑梗死;老年性脑萎缩;腹腔积液;肺部感染;胸腔积液;肺诊断性影像检查的异常所见;泌尿道感染	好转	刘宝华	刘宝华	吕德钊	物理疗法
664	C06肿瘤放化疗、神经康复	2024-08-14	2024-10-21	3558361	赵健伟	男	53Y	开放性胫腓骨下端骨折	股骨骨折;踝部胫后肌腱损伤;下肢皮肤套脱伤;头皮血肿;眼球破裂伤;慢性上颌窦炎;眶骨骨折;舌骨骨折;面部软组织挫伤;颈部局部肿物;运动障碍;由于活动能力降低而需要帮助;涉及使用康复操作的医疗;脂肪肝	治愈	刘宝华	刘宝华	吕德钊	胫骨骨折切开复位钢板内固定术;股骨骨折闭合复位髓内针内固定术;肌肉清创术;腓骨骨折闭合复位内固定术;股骨外固定装置去除术;创面封闭式负压引流术（VSD);股骨骨折闭合性复位术伴内固定;带蒂皮瓣移植术;肌腱、血管、神经探查术;创面封闭式负压引流术（VSD);骨移植术
665	C06肿瘤放化疗、神经康复	2024-09-05	2024-10-27	3560772	谢成周	男	78Y	偏瘫	吞咽困难;混合性失语;神经源性膀胱;神经源性肠;运动障碍;涉及使用康复操作的医疗;脑梗死;脑梗死后遗症;特发性(原发性)高血压;骨质疏松伴有病理性骨折;抑郁状态;下肢静脉血栓形成;颈动脉硬化;肺气肿;低钾血症;肺部感染;肝功能检查的异常结果;下肢静脉血栓形成	好转	刘宝华	商萍	金翩翩	运动训练;日常生活动作训练;低频脉冲电治疗;作业疗法;电动起立床训练
666	C06肿瘤放化疗、神经康复	2024-10-27	2024-10-28	3561177	夏明星	男	38Y	创伤性硬膜下出血	头皮血肿;颞骨骨折;头皮裂伤;一个足趾的创伤性切断;肌腱和肌肉损伤;视神经损伤	其他	刘宝华	商萍	胡晓晓
667	C06肿瘤放化疗、神经康复	2024-10-30	2024-11-11	3566797	李荷叶	女	71Y	颅内恶性肿瘤	脑积水;运动障碍;踝关节强硬;言语障碍;涉及使用其他康复操作的医疗;脑出血后遗症;脑梗死恢复期;特发性(原发性)高血压;甲状腺术后;骨折治疗后恢复期;受压区压疮;肺诊断性影像异常	未愈	刘宝华	商萍	金翩翩	其他控制气压和空气成分的疗法;温针灸治疗;运动训练
668	C06肿瘤放化疗、神经康复	2024-11-24	2024-11-25	3572272	李开福	男	67Y	肾积水伴肾结石	膀胱结石;后天性肾囊肿;前列腺增生;肋骨骨折;下肢动脉粥样硬化;胆囊结石	治愈	竺海波	饶大庞	刘翔	经尿道输尿管镜输尿管激光碎石术
669	C06肿瘤放化疗、神经康复	2024-11-02	2024-12-01	3574031	谢成周	男	78Y	偏瘫	吞咽困难;言语障碍;神经源性膀胱;神经源性肠;运动障碍;涉及使用康复操作的医疗;脑梗死;脑梗死后遗症;高血压;肺部感染;老年性骨质疏松伴病理性骨折;抑郁状态;肺气肿;肺气肿合并肺大泡;静脉血栓形成;下肢动脉粥样硬化	好转	刘宝华	商萍	金翩翩	运动训练;物理疗法;针灸;作业疗法
670	C06肿瘤放化疗、神经康复	2024-11-13	2024-12-18	3581608	杨建臣	男	73Y	消化道出血	失血性休克;细菌性肺炎;胸腔积液;脓毒血症;菌血症;低蛋白血症;运动障碍;吞咽困难;涉及使用康复操作的医疗;脑挫伤;创伤性蛛网膜下出血;颞骨骨折;骨盆骨折;肩关节脱位;骶骨骨折;多浆膜腔积液;气胸;创伤性皮下气肿;下肢静脉肌间血栓形成;甲状腺结节;食管炎;十二指肠球部溃疡	好转	刘宝华	商萍	覃燕青	胃镜检查;胸腔穿刺术;其他控制气压和空气成分的疗法;低频脉冲电治疗
671	C06肿瘤放化疗、神经康复	2024-12-11	2024-12-19	3581864	阮济永	男	73Y	帕金森综合征	脑外伤后综合征;臂丛神经损伤;累及神经和肌肉骨骼系统症状和体征;肌张力障碍;多发性脑梗死;老年性脑萎缩;腰椎间盘突出;肺不张;肺肿物;陈旧性肋骨骨折;甲状腺术后;甲状腺结节;甲状腺囊肿;下肢动脉粥样硬化;肝囊肿;肝钙化灶;颈椎退行性病变;由于活动能力降低而需要帮助	好转	刘宝华	商萍	戴威
672	C06肿瘤放化疗、神经康复	2024-11-13	2024-12-23	3583314	赵琴	女	64Y	脑梗死	运动障碍;偏瘫;言语障碍;功能性吞咽困难;认知障碍;神经源性膀胱;由于活动能力降低而需要帮助;涉及使用康复操作的医疗;轻度贫血;多发性脑梗死;下肢深静脉血栓形成;颈动脉狭窄;下肢动脉粥样硬化;颈动脉硬化;肺部感染;高血压;2型糖尿病;陈旧性肋骨骨折;脂肪肝;胆囊结石;肾结石	好转	刘宝华	商萍	戴威	运动训练;电动起立床训练;平衡功能训练;作业疗法;语言治疗;其他控制气压和空气成分的疗法;超声波联合治疗;超短波短波疗法;针灸;肺功能康复评定;低频脉冲电治疗
673	C07泌尿	2023-12-26	2024-01-06	3467454	戴晓国	男	43Y	创伤性肾血肿	腰椎骨折L1;2型糖尿病	好转	竺海波	虞海峰	刘翔
674	C07泌尿	2024-01-08	2024-01-23	3476636	田茂当	男	54Y	股骨骨折	肱骨骨折;肩胛骨骨折;甲状旁腺恶性肿瘤;甲状旁腺功能亢进;肾积水伴肾输尿管结石;肾功能不全;骨质疏松;代谢性骨病;上颌窦炎	治愈	竺海波	虞海峰	刘翔	股骨骨折闭合复位螺钉内固定术;甲状旁腺部分切除术;肾穿刺引流术
675	C07泌尿	2024-02-27	2024-03-06	3482246	何学池	男	59Y	肾挫伤	创伤性肾血肿;肺大疱;腰椎骨折L5;上颌窦炎	好转	陈映鹤	陈映鹤	陈映鹤
676	C07泌尿	2024-03-17	2024-04-02	3488733	冯观光	男	74Y	髌骨骨折	前列腺增生;膀胱逼尿肌无力;肾盂积水，其他的;尿潴留;老年性脑萎缩;高血压;脂肪肝	治愈	陈映鹤	木海琦	木海琦	髌骨骨折切开复位张力带钢丝内固定术;关节软骨修复术
677	C07泌尿	2024-03-30	2024-04-07	3490206	杨炳钦	男	37Y	肾积水伴肾输尿管结石	前列腺钙化灶;掌骨骨折	治愈	竺海波	虞海峰	刘翔	腹腔镜下输尿管切开取石术;肾周围粘连松解术
678	C07泌尿	2024-04-21	2024-04-30	3497566	林爱芬	男	43Y	肾结石	泌尿道感染;神经源性膀胱;输尿管术后;手术后恢复期;腰椎骨折;后天性肾囊肿;肾挛缩;前列腺增生;脂肪肝	治愈	何有华	杨森	陈超豪2	经皮肾镜碎石术（PCNL）
679	C07泌尿	2024-04-21	2024-05-06	3499110	林久娒	男	76Y	前列腺增生	前列腺结石;尿潴留;肾结石;高血压2级;骨折术后;肺部感染;孤立性肺结节	治愈	陈映鹤	木海琦	柯润疆	经尿道前列腺切除术（TURP）
680	C07泌尿	2024-04-30	2024-05-08	3499523	刘金花	女	55Y	肾恶性肿瘤	肾结石;泌尿道感染;肝血管瘤;骨折术后;肋骨多处骨折;胸腔积液;心包积液	治愈	何有华	杨森	陈超豪2	腹腔镜下肾部分切除术;腹腔镜下肾周粘连松解术
681	C07泌尿	2024-05-04	2024-05-12	3500531	薛美菊	女	78Y	肾结石	膀胱结石;输尿管结石;后天性肾囊肿;肾上腺增生;肠系膜脂肪炎;胸腔积液;胆管积气;高血压2级;输尿管术后;骨折术后;泌尿道感染	治愈	何有华	杨森	陈超豪2	经皮肾镜碎石术（PCNL）
682	C07泌尿	2024-05-06	2024-05-12	3500532	陈成金	男	64Y	单侧腹股沟斜疝	包皮过长;创伤性尿道断裂;高血压2级;骨折术后;脑栓塞	治愈	陈映鹤	南存金	柯润疆	单侧腹股沟斜疝无张力修补术;包皮环切术
683	C07泌尿	2024-05-05	2024-05-12	3500538	王柳英	女	83Y	肾积水伴肾输尿管结石	泌尿道感染;肾结石;胆囊术后;高血压2级;2型糖尿病;2型糖尿病性视网膜病变;2型糖尿病足病;冠状动脉粥样硬化性心脏病;心功能不全;心功能Ⅲ级;慢性心力衰竭;肢体动脉硬化性闭塞症;胃术后;残胃炎;食管隆起性病变;反流性食管炎;胆总管扩张;骨质疏松;腰椎间盘突出;腰椎骨折	治愈	何有华	杨森	陈超豪2	经尿道输尿管支架置入术
684	C07泌尿	2024-05-12	2024-05-14	3501271	陈秀花	女	60Y	肾积水伴输尿管结石	肺肿物;陈旧性肋骨骨折;后天性肾囊肿;胆囊息肉;泌尿道感染	治愈	何有华	杨森	陈超豪2	经尿道输尿管支架置入术;输尿管镜检查
685	C07泌尿	2024-04-14	2024-05-14	3501272	刘世维	男	33Y	膀胱结石	肾结石;前列腺结石;神经源性膀胱;泌尿道感染;脊髓损伤;创伤性截瘫;神经源性肠;颈椎术后;胸椎术后;骨折术后;肋骨多处骨折;肱骨大结节骨折	治愈	张磊	张磊	陈超豪2	经尿道膀胱镜膀胱激光碎石术;膀胱造口术
686	C07泌尿	2024-05-13	2024-05-16	3502041	赵启存	男	69Y	肾积水伴肾输尿管结石	膀胱结石;泌尿道感染;后天性肾囊肿;肾错构瘤;肋骨多处骨折;多发性肝囊肿;特发性(原发性)高血压;肾绞痛	治愈	陈映鹤	南存金	柯润疆	经尿道输尿管/肾盂激光碎石术;经尿道膀胱镜膀胱激光碎石术
687	C07泌尿	2024-05-12	2024-05-20	3503168	陈银兰	女	82Y	肾结石伴有输尿管结石	泌尿道感染;后天性肾囊肿;肺部感染;肺肿物;胆囊结石;卵巢囊肿;下肢动脉粥样硬化;脂肪瘤;陈旧性肋骨骨折;脂肪肝	治愈	何有华	杨森	陈超豪2	输尿管双“J”管取出术;输尿管镜检查;经尿道输尿管/肾盂激光碎石术
688	C07泌尿	2024-05-11	2024-05-21	3503378	潘成判	男	90Y	前列腺增生	膀胱结石;前列腺结石;膀胱憩室;泌尿道感染;高血压2级;心房扩大;心室肥大;窦性心动过缓;室性期前收缩;Ⅰ度房室传导阻滞;Ⅱ度二型房室传导阻滞;二尖瓣反流;三尖瓣疾病,其他的;腹主动脉钙化;下肢动脉粥样硬化;多发性肝囊肿;陈旧性肋骨骨折	治愈	何有华	余凯远	陈超豪2	经尿道前列腺切除术（TURP）;经尿道膀胱镜膀胱激光碎石术
689	C07泌尿	2024-05-16	2024-05-22	3503815	林爱芬	男	43Y	更换肾盂造瘘导管	脓毒血症;肾积水伴肾输尿管结石;输尿管积水;神经源性膀胱;后天性肾囊肿;单侧肾缺如;前列腺增生;肾造口术状态;手术后状态，其他特指的;手术后恢复期;陈旧性腰椎骨折;脂肪肝	其他	何有华	杨森	陈超豪2	肾造口导管置换;膀胱造口术
690	C07泌尿	2024-06-14	2024-06-15	3511359	张中亮	男	29Y	睾丸扭转	精索鞘膜积液;腰骶椎弓骨折;特发性肺纤维化	治愈	陈映鹤	木海琦	柯润疆	睾丸扭转复位术;睾丸固定术
691	C07泌尿	2024-06-06	2024-06-16	3511774	董松竹	女	74Y	股骨颈骨折	2型糖尿病;胆囊息肉;老年性心脏瓣膜病;肺肿物	治愈	孙辽军	孙辽军	余炜	全髋关节置换;髋轴面，陶瓷与陶瓷
692	C07泌尿	2024-06-28	2024-07-02	3516788	林爱芬	男	43Y	肾积水伴输尿管结石	泌尿道感染;神经源性膀胱;后天性肾囊肿;手术后肾缺失;前列腺增生;陈旧性腰椎骨折;脂肪肝;截瘫	治愈	竺海波	饶大庞	刘翔	经尿道膀胱镜膀胱激光碎石取石术;经尿道输尿管支架置入术
693	C07泌尿	2024-07-13	2024-07-15	3521727	周德理	男	43Y	肾上腺肿瘤	孤立性肺结节;手术后恢复期;肾术后;胆囊切除术后状态;脾术后;胸椎骨折	未愈	陈映鹤	王怡君	柯润疆
694	C07泌尿	2024-07-08	2024-07-24	3524873	周纪福	男	60Y	肾积水伴输尿管狭窄	肾挛缩;慢性肾盂炎;前列腺钙化灶;特发性肺纤维化;腰骶椎弓骨折;孤立性肺结节;腰椎间盘突出;肾积水伴肾结石	治愈	陈映鹤	王怡君	柯润疆	单侧肾切除术
695	C07泌尿	2024-08-22	2024-08-28	3538407	杨岩芬	男	88Y	前列腺增生	膀胱颈梗阻;泌尿道感染;腰椎骨折L1;胫前动脉闭塞;肝囊肿;肝血管瘤;陈旧性肺结核;孤立性肺结节	治愈	陈映鹤	王怡君	柯润疆	经尿道前列腺切除术（TURP）
696	C07泌尿	2024-08-24	2024-08-31	3539358	柯秀兰	女	76Y	输尿管结石	泌尿道感染;慢性上颌窦炎;下肢动脉粥样硬化;冠状动脉肌桥;胸腔积液;肺肿物;脂肪肝;肾结石;骨折术后	治愈	张磊	杨森	陈超豪2	经尿道输尿管支架置入术;输尿管镜检查
697	C07泌尿	2024-08-22	2024-08-31	3539375	李国清	男	54Y	肾结石	前列腺增生;前列腺钙化灶;强直性脊柱炎;胆囊息肉;后天性肾囊肿;肋骨骨折	治愈	陈映鹤	王怡君	柯润疆	经皮肾镜碎石术（PCNL）
698	C07泌尿	2024-09-08	2024-09-19	3546490	苏志涨	男	63Y	前列腺增生	尿潴留;踝关节骨折;特发性(原发性)高血压;2型糖尿病;脑梗死后遗症;脂肪肝;膀胱逼尿肌无力	治愈	何有华	余凯远	范来来	经尿道前列腺切除术（TURP）;膀胱造口术
699	C07泌尿	2024-09-21	2024-09-28	3549971	吴存横	男	45Y	肾恶性肿瘤	肾结石;后天性肾囊肿;前列腺增生;下肢骨折;眶骨骨折;上颌窦炎;肋骨多处骨折;肺肿物;2型糖尿病;胸腔积液;前列腺结石;面骨骨折;慢性筛窦炎	好转	何有华	木海琦	范来来	腹腔镜下肾部分切除术;腹腔镜下肾周粘连松解术
700	C07泌尿	2024-09-26	2024-10-10	3553878	程银丰	男	57Y	肾挫伤	肋骨多处骨折;PSA升高;前列腺增生;后天性肾囊肿;肾结石	好转	陈映鹤	陈映鹤	柯润疆	经直肠前列腺穿剌活组织检查
701	C07泌尿	2024-10-19	2024-10-26	3560008	赵江海	男	74Y	前列腺增生	前列腺结节;肺肿物;肝囊肿;肋骨多处骨折;下肢动脉粥样硬化;2型糖尿病	治愈	何有华	何有华	范来来	其他经尿道前列腺切除术;经尿道膀胱镜膀胱血块清除术
702	C07泌尿	2024-11-04	2024-11-06	3564575	李崇虎	男	76Y	尿潴留	前列腺增生;2型糖尿病;特发性(原发性)高血压;下肢动脉粥样硬化;脂肪肝;骨折术后	好转	陈映鹤	木海琦	木海琦
703	C07泌尿	2024-11-10	2024-11-12	3567048	陈岩虎	男	95Y	泌尿道感染	尿潴留;胆囊结石;特发性(原发性)高血压;腰椎压缩性骨折;前列腺增生	好转	何有华	余凯远	范来来
704	C07泌尿	2024-11-10	2024-11-19	3569769	梁世满	男	50Y	肾积水伴肾结石	慢性肝病;肋骨多处骨折	治愈	何有华	何有华	范来来	腹腔镜下单侧肾切除术;腹腔镜下肾周粘连松解术
705	C07泌尿	2024-11-20	2024-11-24	3571765	陈黎黎	女	78Y	急性肾盂肾炎	肾盂积水，其他的;肋骨多处骨折;高血压;老年性痴呆;输尿管积水;糖尿病;头皮血肿	治愈	陈映鹤	木海琦	柯润疆
706	C07泌尿	2024-11-25	2024-11-27	3573003	程秀琴	女	76Y	肾积水伴输尿管狭窄	慢性胃炎;胆囊结石;下肢动脉粥样硬化;肋骨多处骨折	好转	陈映鹤	木海琦	柯润疆	经尿道输尿管支架置入术;输尿管镜检查
707	C07泌尿	2024-11-26	2024-12-01	3574529	金贤申	男	38Y	神经源性膀胱	手术后恢复期;高位截瘫;陈旧性腰椎骨折;胆囊息肉;精神分裂症	好转	陈映鹤	木海琦	柯润疆	耻骨上膀胱造口导尿管插入术
708	C07泌尿	2024-11-29	2024-12-02	3575118	夏立松	男	67Y	创伤性肾血肿	膀胱出血;肋骨多处骨折;多发性脑梗死;老年性脑萎缩	好转	何有华	余凯远	范来来
709	C07泌尿	2024-12-12	2024-12-18	3581304	杨小义	男	57Y	尿道球部断裂	创伤性阴囊血肿;创伤性会阴血肿;肾结石;耻骨骨折	好转	张磊	杨森	陈超豪2	尿道切开探查术;阴囊血肿清除术;耻骨上膀胱造口导尿管插入术
710	C07泌尿	2024-12-18	2024-12-27	3584955	林爱芬	男	44Y	肾结石伴有积水和感染	后天性肾囊肿;神经源性膀胱;肾挛缩;前列腺增生;骨折术后;脂肪肝	治愈	竺海波	虞海峰	刘翔	经尿道输尿管/肾盂激光碎石术;输尿管镜检查;输尿管支架取出术
711	C08肛肠科	2024-01-19	2024-01-20	3474818	李林	男	21Y	取除骨折内固定装置		其他	孔建中	陈墨川	胡炜	尺骨内固定装置去除术
712	C08肛肠科	2024-01-22	2024-01-23	3476298	胡建炘	男	51Y	取除骨折内固定装置	肝回声不均;前列腺增生;前列腺结石	其他	孔建中	陈墨川	胡炜	跟骨内固定物取出术
713	C08肛肠科	2024-03-21	2024-04-10	3491374	杨石林	男	53Y	肛门损伤	臀部软组织损伤;尿潴留;神经源性膀胱;腰骶部脊柱骨折	治愈	卢敏	卢敏	陈敏远	皮肤和皮下坏死组织切除清创术;肛门镜检查
714	C08肛肠科	2024-04-23	2024-05-01	3498029	熊建松	男	20Y	尺骨骨折	肺诊断性影像异常	好转	翁益民	翁益民	王特	尺骨骨折切开复位钢针内固定术
715	C08肛肠科	2024-04-23	2024-05-01	3498031	陈昆建	男	35Y	肩胛骨骨折	肩胛上神经损伤;脂肪肝;胆囊肥大	好转	翁益民	翁益民	王特	肩胛骨骨折切开复位钢板内固定术;臂丛神经松解术
716	C08肛肠科	2024-05-13	2024-05-16	3501884	林姜茶	女	67Y	跟骨骨折	高血压;2型糖尿病;胸主动脉钙化	治愈	黄义星	黄义星	陈春慧	跟骨骨折切开复位螺钉内固定术
717	C08肛肠科	2024-05-11	2024-05-17	3502222	易会岳	男	57Y	膀胱结石	前列腺增生;脂肪肝;前列腺结节;肋骨骨折;尘肺;肝血管瘤	治愈	何有华	杨森	陈超豪2	经尿道膀胱镜膀胱取石术;经尿道(超声)激光诱导前列腺切除术(TULIP)
718	C08肛肠科	2024-05-30	2024-06-04	3507719	李晨雨	女	10Y	肱骨髁上骨折		治愈	张敬东	李玉安	潘天龙	肱骨骨折闭合复位钢针内固定术
719	C08肛肠科	2024-05-29	2024-06-09	3509347	张仁康	男	39Y	股骨干骨折	尺骨近端骨折;桡骨头脱位;肘关节脱位 ;输尿管结石;前列腺结石;肺诊断性影像异常;腰椎间盘突出;肾积水伴输尿管结石	治愈	水小龙	水小龙	汪吉棋	股骨骨折闭合复位髓内针内固定术;肘关节脱位手法整复术;尺骨骨折切开复位钢针内固定术;桡骨骨折切开复位螺钉内固定术;关节软骨修复术;肘关节固定术;胫骨结节牵引
720	C08肛肠科	2024-06-04	2024-06-10	3509775	郑爱柳	女	46Y	锁骨骨折	二尖瓣反流	好转	石成弟	石成弟	郑文浩	锁骨骨折切开复位钢板内固定术;锁骨植骨术
721	C08肛肠科	2024-06-06	2024-06-14	3511062	叶雪芳	女	62Y	股骨下端骨折	肺诊断性影像异常;高血压;多发性肝囊肿;脂肪肝;胆囊息肉;后天性肾囊肿	好转	冯永增	冯永增	王贤亮	股骨骨折切开复位钢板内固定术;关节软骨修复术;股骨植骨术
722	C08肛肠科	2024-06-05	2024-06-14	3511093	毛建荣	男	60Y	肱骨近端骨折	肺诊断性影像异常;肺大疱;高血压;脂肪肝;胆囊结石;肩胛骨良性肿瘤	好转	冯永增	冯永增	王贤亮	肱骨骨折切开复位钢板内固定术;关节软骨修复术;肱骨植骨术
723	C08肛肠科	2024-06-22	2024-06-26	3515048	徐雨涵	女	4Y	取除骨折内固定装置		其他	张敬东	李玉安	潘天龙	股骨内固定装置去除术
724	C08肛肠科	2024-06-15	2024-06-27	3515340	王柳英	女	83Y	肾输尿管结石伴有积水和感染	心功能Ⅲ级;高血压;2型糖尿病性视网膜病变;冠状动脉粥样硬化性心脏病;胫动脉闭塞;残胃炎;食管隆起性病变;反流性食管炎;胆总管扩张;骨质疏松;腰椎间盘突出;腰椎骨折;腰椎术后;老年性脑萎缩;2型糖尿病足;胆囊术后	治愈	何有华	杨森	范来来	经尿道输尿管/肾盂激光碎石术;输尿管双“J”管取出术
725	C08肛肠科	2024-06-14	2024-06-29	3515788	杨珠妹	女	79Y	直肠恶性肿瘤	肠粘连;高血压;陈旧性肋骨骨折;肝钙化灶;脂肪肝;结肠息肉;后天性肾囊肿;会阴脂肪瘤;退行性主动脉瓣疾患;下肢动脉粥样硬化;主动脉瓣关闭不全	好转	刘长宝	王中林	王中林	腹腔镜下直肠根治术;腹腔镜回肠造口术;腹腔镜下肠粘连松解术
726	C08肛肠科	2024-06-30	2024-07-04	3517477	朱梓妍	女	1Y	肱骨外髁骨折		治愈	张敬东	闫广奎	朱瑞博	肱骨骨折切开复位钢针内固定术
727	C08肛肠科	2024-06-30	2024-07-04	3517482	蔡予琛	男	5Y	取除骨折内固定装置		其他	张敬东	闫广奎	朱瑞博	股骨内固定装置去除术
728	C08肛肠科	2024-06-28	2024-07-07	3518538	林美芬	女	57Y	胫骨平台伴腓骨骨折	膝关节积液;腰椎骨折L3;后天性肾囊肿	好转	黄俊武	余贤斌	马亮亮	胫骨骨折切开复位钢板内固定术;胫骨人工骨植骨术;腰椎骨折球囊扩张成形术
729	C08肛肠科	2024-06-29	2024-07-13	3520653	陈珠钗	女	85Y	股骨粗隆间骨折	冠状动脉粥样硬化性心脏病;肺部感染;肥厚性心肌病;便秘	治愈	黄义星	黄义星	陈春慧	股骨骨折闭合复位髓内针内固定术
730	C08肛肠科	2024-07-19	2024-07-22	3524205	叶志多	男	57Y	锁骨骨折	脂肪肝;后天性肾囊肿;前列腺结石;肋骨多处骨折;创伤性湿肺;主动脉钙化;肺诊断性影像异常	治愈	水小龙	水小龙	汪吉棋	锁骨骨折切开复位钢板内固定术;锁骨植骨术
731	C08肛肠科	2024-09-19	2024-10-01	3551524	骆倩	女	26Y	创伤性直肠破裂	开放性会阴损伤;开放性腹部损伤;耻骨骨折;骨盆骨折	治愈	王中林	王中林	王中林	腹腔镜下结肠造口术;盆骨外固定术;肛门裂伤缝合术;皮肤和皮下坏死组织切除清创术;创面封闭式负压引流术（VSD)
732	C08肛肠科	2024-09-27	2024-10-06	3552755	金纯菜	女	76Y	股骨粗隆下骨折	肥厚型梗阻性心肌病;退行性主动脉瓣疾患	好转	黄俊武	胡炜	胡炜	股骨骨折切开复位髓内针内固定术
733	C08肛肠科	2024-10-11	2024-10-19	3557355	邹招成	男	50Y	胫骨平台骨折	腓骨头骨折;膝关节积液;特发性肺纤维化;肺诊断性影像检查的异常所见;主动脉钙化;冠状动脉粥样硬化	好转	黄俊武	胡炜	胡炜	胫骨骨折切开复位钢板内固定术;关节软骨修复术;胫骨人工骨植骨术
734	C08肛肠科	2024-10-19	2024-10-23	3559198	王玉芝	女	53Y	取除骨折内固定装置	脂肪肝;肺诊断性影像检查的异常所见;肝钙化灶	其他	黄俊武	胡炜	胡炜	腓骨内固定装置去除术;腓骨人工骨植骨术
735	C09肛肠科	2023-12-31	2024-01-07	3468168	叶兰芳	女	59Y	混合痔	直肠黏膜脱垂;高血压;2型糖尿病;陈旧性肺结核;陈旧性肋骨骨折	好转	叶云奎	蔡锚	蔡锚	痔上直肠黏膜环形切除吻合术（PPH术）
736	C09肛肠科	2024-03-06	2024-03-11	3483298	李传付	男	67Y	手术后瘢痕性尿道闭锁	2型糖尿病;手术后恢复期;骨折术后	未愈	陈映鹤	陈映鹤	陈映鹤
737	C09肛肠科	2024-03-23	2024-03-31	3488089	吴小勇	男	50Y	肛瘘	取除骨折内固定装置;踝关节骨折;特发性(原发性)高血压;乙型病毒性肝炎;腔隙性脑梗死;肝囊肿;肝钙化灶;胆囊息肉;前列腺增生;前列腺结石	治愈	洪建军	卢晓郎	卢晓郎	踝关节内固定装置去除术;瘢痕单纯切除,Z字改形修复术;肛门瘘管切除术
738	C09肛肠科	2024-04-22	2024-04-27	3496694	陈灵芳	女	48Y	取除骨折内固定装置	锁骨骨折;脂肪肝;肝囊肿;胆囊息肉;肾结石;特发性肺纤维化	其他	赵友明	赵友明	柯陈荣	锁骨内固定装置去除术
739	C09肛肠科	2024-06-02	2024-06-04	3507806	江爱兰	女	64Y	结肠息肉	慢性结肠炎;胃肠功能紊乱;特发性(原发性)高血压;肺肿物;肋骨骨折;慢性鼻窦炎;糜烂性胃炎	治愈	叶云奎	黄崇杰	黄崇杰	结肠镜下结肠病损电凝术
740	C09肛肠科	2024-06-15	2024-06-22	3513640	陈笑平	女	56Y	锁骨骨折	头皮血肿	治愈	黄义星	黄义星	陈春慧	锁骨骨折切开复位钢板内固定术;锁骨植骨术
741	C09肛肠科	2024-07-01	2024-07-06	3518147	陈德丽	男	36Y	肛门生殖器疣	孤立性肺结节;肋骨骨折	治愈	刘长宝	陈奕	陈奕	肛门病损切除术
742	C09肛肠科	2024-10-12	2024-10-22	3558757	杨珠妹	女	79Y	肠造口旁疝	肠粘连;直肠恶性肿瘤个人史;特发性(原发性)高血压;开放性肋骨骨折;下肢动脉粥样硬化;脂肪肝;后天性肾囊肿	治愈	王中林	王中林	王中林	回肠部分切除术;回肠造口还纳术;肠粘连松解术;腹壁疝修补术;结肠镜检查
743	C09肛肠科	2024-10-26	2024-11-02	3563038	郑柄权	男	90Y	直肠恶性肿瘤	退行性主动脉瓣疾患;二尖瓣反流;肺肿物;肋骨骨折;胆总管结石;心包积液;主动脉(瓣)关闭不全	好转	刘长宝	王中林	王中林	经肛门直肠病损根治术
744	C10感染内科	2024-01-02	2024-01-10	3469464	朱秀琴	女	86Y	脓毒血症	中毒性脑病;软组织感染;特发性(原发性)高血压;下肢静脉肌间血栓形成;下肢动脉粥样硬化;老年性痴呆;腔隙性脑梗死;骨折术后恢复期;后天性肾囊肿	好转	周光耀	黄珊珊	黄珊珊
745	C10感染内科	2024-01-09	2024-01-14	3471322	林建彬	男	35Y	取除骨折内固定装置	陈旧性肋骨骨折;脂肪肝	其他	翁益民	翁益民	王特	锁骨内固定装置去除术
746	C10感染内科	2024-01-07	2024-01-20	3474390	姚春涛	男	64Y	脓毒血症	导管相关性感染;胃恶性肿瘤个人史;肝恶性肿瘤;特发性(原发性)高血压;2型糖尿病;慢性肾功能不全尿毒症期;腹股沟术后;骨折术后;血液透析;肝术后;胃术后;脾继发恶性肿瘤;骨继发恶性肿瘤;腹膜继发恶性肿瘤;慢性肾脏病5期;恶性肿瘤维持性化学治疗	好转	周光耀	黄珊珊	林秀珍	血液透析
747	C10感染内科	2024-01-24	2024-02-07	3479073	胡小洁	女	61Y	肺部感染	椎管狭窄;老年性骨质疏松伴病理性骨折;筛窦炎;上颌窦炎;蝶窦炎;腰椎椎管狭窄	好转	金玲湘	黄珊珊	林秀珍
748	C10感染内科	2024-01-18	2024-02-20	3480200	吴照正	男	65Y	右肺恶性肿瘤	I型呼吸衰竭;呼吸心跳骤停;肺部感染;泌尿道感染;肠梗阻;陈旧性肋骨骨折;高脂血症;肾上腺增粗;后天性肾囊肿;脱髓鞘性脑病;颅内继发恶性肿瘤;淋巴结继发恶性肿瘤;肾上腺继发性恶性肿瘤;胰腺继发恶性肿瘤	死亡	诸葛璐	诸葛璐	吴佐罗
749	C10感染内科	2024-02-18	2024-02-27	3480953	戚松菊	女	82Y	大肠杆菌败血症	脓毒性休克;急性肾功能不全;中毒性心肌炎;二尖瓣主动脉瓣及三尖瓣关闭不全;心功能不全;轻度肺动脉高压;持续性心房颤动;下肢动脉粥样硬化闭塞症;肝囊肿;陈旧性股骨粗隆间骨折	治愈	诸葛璐	吴佐罗	吴珍珠2
750	C10感染内科	2024-02-24	2024-02-29	3481350	罗铁伦	男	75Y	结核性脑膜炎	药物和药剂引起的局限性皮疹;2型糖尿病;2型糖尿病肾病III期;骨质疏松伴有病理性骨折;腰椎侧弯;高血压性心脏病;房间隔缺损;腔隙性脑梗死;肺气肿;胸腔积液;肺动脉高压;气胸	好转	诸葛璐	诸葛璐	吴佐罗
751	C10感染内科	2024-03-13	2024-03-23	3485814	戴爱连	女	59Y	感染性发热	特发性(原发性)高血压;2型糖尿病;脂肪肝;子宫术后;骨折术后	治愈	周光耀	黄珊珊	林秀珍
752	C10感染内科	2024-03-12	2024-03-26	3486713	张金英	女	91Y	感染性发热	下肢静脉血栓形成;高血压性心脏病;腔隙性脑梗死;阿尔茨海默病;主动脉硬化;胸椎压缩性骨折;骨质增生;胆囊息肉;后天性肾囊肿;胸椎椎管狭窄;冠状动脉粥样硬化;颈动脉硬化;下肢动脉粥样硬化;慢性乳突炎;晶状体疾患	治愈	周光耀	方佩佩2	林秀珍
753	C10感染内科	2024-03-27	2024-04-07	3490030	王亚良	男	48Y	酒精性肝病	胆汁淤积性肝炎;白细胞减少;高血压;高脂血症;陈旧性肋骨骨折	好转	诸葛璐	诸葛璐	吴珍珠2
754	C10感染内科	2024-04-08	2024-04-17	3493374	李昌福	男	52Y	药物性肝损害	陈旧性肺结核;结核性支气管扩张，痰培养(-);骨折术后	好转	周光耀	方佩佩2	黄珊珊
755	C10感染内科	2024-03-24	2024-04-20	3494206	林贻谋	男	91Y	慢性硬膜下血肿	肺部感染;泌尿道感染;脑萎缩;慢性心力衰竭;心包积液;胸腔积液;心房颤动;高血压;下肢动脉粥样硬化;心功能Ⅳ级;肾功能不全;陈旧性肋骨骨折;上肢动脉粥样硬化;冈上肌肌腱钙化;肩撞击综合征	好转	周光耀	方佩佩2	黄珊珊	硬脑膜下钻孔引流术
756	C10感染内科	2024-04-08	2024-04-24	3495664	张金英	女	91Y	肠道感染	下肢静脉血栓形成;高血压性心脏病;腔隙性脑梗死;主动脉硬化;胸椎压缩性骨折;阿尔茨海默病;冠状动脉粥样硬化;颈动脉硬化;下肢动脉粥样硬化;胸椎椎管狭窄;晶状体疾患	治愈	周光耀	黄珊珊	黄珊珊
757	C10感染内科	2024-04-21	2024-04-25	3496114	周宝钗	女	88Y	真菌败血症	泌尿道念珠菌病;原发性腹膜炎;骨髓抑制;凝血功能障碍;中毒性心肌炎;甲状腺功能减退症;下肢深静脉血栓形成;高钠血症;高氯血症;低钾血症;受压区压疮;后天性肾囊肿;肾结石;骨折术后;眼术后	好转	周光耀	周光耀	黄珊珊
758	C10感染内科	2024-04-20	2024-04-30	3497554	戴方娟	女	80Y	中毒性心肌炎	脓毒血症;急性肾盂肾炎;肺部感染;急性呼吸衰竭（I型呼吸衰竭）;胸腔积液;高血压;2型糖尿病;老年性痴呆;子宫体脂肪瘤;甲状腺结节;多发性肝囊肿;胆囊结石;肾结石;下肢静脉血栓形成;乳腺术后;脑梗死后遗症;骨折术后;腹部诊断性影像异常;放射治疗史	好转	周光耀	周光耀	黄珊珊
759	C10感染内科	2024-04-08	2024-05-01	3497930	李有超	男	41Y	革兰阴性杆菌败血症	肝功能不全;凝血功能异常;泌尿道感染;非感染性急性肠炎;骨盆骨折;肋骨骨折;肺挫伤;非酒精性脂肪性肝炎	治愈	诸葛璐	诸葛璐	吴珍珠2
760	C10感染内科	2024-04-16	2024-05-14	3501133	李元生	男	79Y	克雷伯杆菌败血症	中毒性脑病;肝损害;胸腔积液;心包积液;抗生素相关性肠炎;肝恶性肿瘤;慢性乙型病毒性肝炎;腔隙性脑梗死;下肢动脉粥样硬化;高血压;胆囊结石;肾结石;肋骨多处骨折;甲状腺结节;听觉丧失	好转	周光耀	方佩佩2	黄珊珊
761	C10感染内科	2024-05-09	2024-05-21	3503614	虞亦谁	男	51Y	酒精性肝硬化	肝性脑病;胆汁淤积性肝炎;感染性发热;肱骨骨折;下肢动脉粥样硬化;腔隙性脑梗死	好转	诸葛璐	诸葛璐	林秀珍
762	C10感染内科	2024-05-08	2024-05-25	3504468	孙飞芹	女	75Y	急性肾功能不全	脓毒血症;腔隙性脑梗死;颈动脉硬化;下肢动脉粥样硬化;肋骨骨折;腰椎间盘突出;高血压;糖尿病;高脂血症;良性阵发性位置性眩晕;非毒性多个甲状腺结节	治愈	周光耀	方佩佩2	黄珊珊
763	C10感染内科	2024-05-16	2024-06-02	3506987	唐达椿	男	81Y	感染性发热	阿尔茨海默病;腔隙性脑梗死;前列腺增生;支气管扩张(症);孤立性肺结节;颈动脉硬化;频发性房性期前收缩;陈旧性肋骨骨折;前列腺增生;后天性肾囊肿;脂肪肝;肝钙化灶;锁骨下动脉粥样硬化;阵发性房性心动过速	好转	方佩佩2	方佩佩2	黄珊珊
764	C10感染内科	2024-06-13	2024-06-23	3513884	蔡碎花	女	88Y	脓毒血症	急性肾功能不全;急性胆囊炎;局限性腹膜炎;腹腔积液;肺恶性肿瘤;髂骨骨折;高血压;2型糖尿病;脑梗死后遗症;脑软化灶;多发性脑梗死;下肢静脉肌间血栓形成;下肢动脉粥样硬化;后天性肾囊肿	治愈	方佩佩2	周光耀	黄珊珊	颈内静脉穿刺中心静脉置管术
765	C10感染内科	2024-06-17	2024-06-26	3514879	李林勇	男	16Y	变应性鼻炎	窦性心动过速;上颌窦骨折	好转	周光耀	方佩佩2	黄珊珊
766	C10感染内科	2024-06-18	2024-06-26	3514880	陈伟	男	34Y	泌尿道感染	精神分裂症;截瘫;骨折术后;神经源性膀胱;神经源性肠;胫骨平台骨折;骶骨骨折;脂肪肝;胆囊结石;后天性肾囊肿;胸椎扭伤和劳损	好转	诸葛璐	诸葛璐	吴珍珠2
767	C10感染内科	2024-06-22	2024-07-06	3518211	林令娟	女	68Y	脓毒血症	中毒性脑病;中毒性心肌炎;急性肾功能不全;重症肺炎;低氧血症;真菌性泌尿道感染;房间隔缺损;阵发性心房颤动;心功能不全;癫痫，其他的;2型糖尿病;老年性痴呆;多发性脑梗死;骨折术后恢复期;自身免疫相关性脑病;肺动脉高压;低蛋白血症;感染性贫血	好转	诸葛璐	诸葛璐	吴珍珠2	腰椎穿刺术
768	C10感染内科	2024-07-24	2024-08-03	3528305	李启滔	男	61Y	感染性发热	下肢动脉粥样硬化;骨折术后恢复期;孤立性肺结节	好转	方佩佩2	方佩佩2	吴佐罗
769	C10感染内科	2024-08-18	2024-08-22	3535933	孙明光	男	63Y	摄入食物中其他特指有害物质的毒性效应	急性胃肠炎;肺诊断性影像异常;前列腺钙化灶;骨折术后;胆囊息肉;前列腺增生;肾错构瘤	治愈	周光耀	周光耀	林秀珍
770	C10感染内科	2024-08-21	2024-09-01	3539809	叶洪香	女	58Y	泌尿道感染	肾盂积水;输尿管积水;膀胱炎;输尿管扩张;神经源性膀胱;尿潴留;膀胱肿物;运动神经元病;截瘫[双下肢瘫痪];骨质疏松;骨折术后;下肢动脉粥样硬化;多发性脑梗死;脂肪肝;肝囊肿;胆囊息肉	治愈	周光耀	周光耀	林秀珍
771	C10感染内科	2024-08-28	2024-09-03	3540451	潘行友	男	49Y	足软组织感染	2型糖尿病足病;链球菌作为分类于其他章疾病的原因，其他的;后天性肾囊肿;前列腺增生;骨折术后	好转	方佩佩2	方佩佩2	吴佐罗
772	C10感染内科	2024-08-21	2024-09-04	3541114	林振杰	男	66Y	脓毒血症	感染性休克;中毒性心肌炎;急性肾功能不全;继发性血小板减少;低钾血症;锁骨下动脉粥样硬化;下肢动脉粥样硬化;老年性心脏病;多发性脑梗死;陈旧性肋骨骨折;肝囊肿;上颌窦炎	治愈	诸葛璐	诸葛璐	吴珍珠2
773	C10感染内科	2024-08-28	2024-09-07	3541796	彭家冲	男	51Y	脓毒血症	中毒性肝炎;低钾血症;软组织感染;中度贫血;痛风;脂肪肝;肾结石;输尿管结石;肩撞击综合征;骨关节病;肋骨骨折;隐性梅毒;肩关节关节病;输尿管积水;白斑病，不可归类在他处者	好转	方佩佩2	方佩佩2	吴佐罗
774	C10感染内科	2024-09-08	2024-09-25	3548619	戴方娟	女	81Y	肺部感染	2型糖尿病;高血压;痴呆;乳腺术后;子宫体脂肪瘤;宫颈恶性肿瘤;甲状腺结节;脂肪肝;多发性肝囊肿;胆囊结石;肾结石;脑梗死后遗症;颈动脉硬化;主动脉钙化;骨折术后;下肢动脉粥样硬化	好转	方佩佩2	方佩佩2	吴佐罗
775	C10感染内科	2024-09-16	2024-09-28	3549718	李元生	男	80Y	脓毒血症	肝恶性肿瘤;慢性乙型病毒性肝炎;多发性脑梗死;高血压;甲状腺结节;胆囊结石;肾结石;下肢动脉粥样硬化;陈旧性肋骨骨折	治愈	方佩佩2	方佩佩2	吴佐罗
776	C10感染内科	2024-09-17	2024-09-30	3550576	谢秋	女	39Y	下肢软组织感染	骨折术后恢复期;贫血;胆囊息肉	好转	周光耀	周光耀	林秀珍
777	C10感染内科	2024-10-06	2024-10-27	3560472	韩草也	女	54Y	胸椎结核	胸椎压缩性骨折;椎旁脓肿;成年脊柱骨软骨病;腰椎退行性病变;椎间盘突出;椎管狭窄;腰椎骨质增生;下肢动脉粥样硬化	好转	诸葛璐	诸葛璐	黄珊珊
778	C11肾内科	2023-12-31	2024-01-02	3466087	林鹤群	男	51Y	2型糖尿病肾病III期	2型糖尿病性视网膜病变;2型糖尿病性周围神经病;2型糖尿病性周围血管病变;2型糖尿病性心肌病;2型糖尿病;特发性(原发性)高血压;高脂血症;慢性乙型病毒性肝炎;下肢动脉粥样硬化;颈动脉硬化;脂肪肝;前列腺结石;后天性肾囊肿;骨折术后;肺结核瘤经证实(+)	好转	赵艳玲	施珍	陈瑶慧
779	C11肾内科	2023-12-24	2024-01-03	3466776	金良德	男	61Y	2型糖尿病肾病V期	肾脏透析状态;高血压性心脏病;心功能Ⅲ级;骨密度和结构的疾患;颈动脉硬化;下肢动脉粥样硬化;陈旧性面骨骨折	好转	李占园	陈琰	陈琰
780	C11肾内科	2024-01-14	2024-01-15	3472292	陈玉英	女	63Y	骨质疏松伴有病理性骨折	2型糖尿病;高脂血症;脂肪肝;乳房纤维囊性乳腺病;甲状腺结节;胆囊息肉;子宫切除术后状态	好转	毛朝鸣	郑淑蓓	金怡
781	C11肾内科	2024-01-19	2024-01-20	3474967	金卡善	女	61Y	强直性脊柱炎	上呼吸道感染;2型糖尿病;特发性(原发性)高血压;原发性单侧膝关节病;骨密度和结构其他特指的疾患;脂肪肝;骨折术后	好转	毛朝鸣	郑淑蓓	金怡
782	C11肾内科	2024-01-16	2024-01-21	3475344	汪丐洪	男	68Y	2型糖尿病肾病V期	2型糖尿病;高血压心脏和肾脏病伴有肾衰竭;冠状动脉支架植入后状态;完全性右束支传导阻滞;颈动脉硬化;多发性脑梗死;肺炎;肺诊断性影像异常;骨折术后;陈旧性肋骨骨折;肾结石	好转	赵艳玲	施珍	陈瑶慧
783	C11肾内科	2024-01-20	2024-01-21	3475419	陈旺弟	女	75Y	类风湿性关节炎	2型糖尿病;颈椎间盘突出;腰椎间盘突出;骨质疏松伴有病理性骨折;脊柱侧弯;颈椎退行性病变;腰椎退行性病变	好转	毛朝鸣	郑淑蓓	金怡
784	C11肾内科	2024-01-15	2024-01-23	3476325	张彩弟	女	82Y	高血压心脏和肾脏病同时伴有(充血性)心力衰竭和肾衰竭	血液透析;2型糖尿病肾病V期;呼吸道感染;胆囊切除术后状态;骨折术后;膀胱恶性肿瘤个人史;后天性肾囊肿	好转	赵艳玲	施珍	陈瑶慧	为肾透析的临时静脉导管拔管;血液透析;为肾透析的临时静脉插管术;为肾透析半永久静脉插管术
785	C11肾内科	2024-01-19	2024-01-23	3476376	滕显娟	女	67Y	系统性红斑狼疮，累及器官或系统	间质性肺炎;轻度贫血;支气管哮喘;肺动脉高压中度;肺大疱;特发性(原发性)高血压;胆囊结石;后天性肾囊肿;肾结石;颈动脉硬化;下肢动脉粥样硬化;陈旧性肋骨骨折	好转	毛朝鸣	郑淑蓓	金怡
786	C11肾内科	2023-12-10	2024-03-02	3481505	项和平	女	64Y	高血压心脏和肾脏病伴有肾衰竭	血液透析;肾性贫血;肺\[部分\]后天性缺失;眼底动脉硬化;肺部感染;呼吸衰竭;胸腔积液;心功能不全;心房颤动;胆总管结石伴胆管炎;冠状动脉粥样硬化性心脏病;慢性阻塞性肺病;胆囊结石;肺动脉高压;肺诊断性影像异常;后天性肾囊肿;骨质疏松伴有病理性骨折;慢性胃炎;高尿酸血症	好转	赵艳玲	施珍	陈瑶慧	连续性肾脏替代治疗[CRRT];锁骨下静脉穿刺中心静脉置管术;为肾透析的临时静脉插管术;气管内插管;胸腔闭式引流术;气管插管去除;为肾透析的临时静脉插管术;为肾透析的临时静脉插管术;气管内插管;气管插管去除;血液透析;连续性肾脏替代治疗[CRRT];胸腔闭式引流术
787	C11肾内科	2024-01-08	2024-03-07	3482415	程善林	男	56Y	痛风性肾病	慢性肾功能不全;痛风性关节炎;血液透析;上消化道出血;重度贫血;肺部感染;糜烂性胃炎;冠状动脉支架植入后状态;陈旧性心肌梗死;肋骨多处骨折;胸椎骨折;下肢动脉粥样硬化	好转	李占园	陈琰	潘敏	血液透析;为肾透析半永久静脉插管术;为肾透析的临时静脉插管术;为肾透析的临时静脉插管术;为肾透析的临时静脉插管术
788	C11肾内科	2024-03-02	2024-03-13	3483591	项和平	女	64Y	高血压心脏和肾脏病伴有肾衰竭	血液透析;肾性贫血;眼底动脉硬化;心房颤动;手术后状态，其他特指的;心功能不全;胆总管结石伴胆管炎;胆囊结石;慢性阻塞性肺病;冠状动脉粥样硬化性心脏病;肺动脉高压;肺诊断性影像异常;后天性肾囊肿;骨质疏松伴有病理性骨折;慢性胃炎;胃息肉;白内障;下肢动脉粥样硬化	好转	赵艳玲	陈琰	陈瑶慧	血液透析;为肾透析的临时静脉插管术
789	C11肾内科	2024-03-13	2024-03-16	3484359	林鹤群	男	51Y	2型糖尿病肾病III期	2型糖尿病性周围血管病;2型糖尿病性视网膜病变;2型糖尿病性周围神经病;2型糖尿病性心肌病;高脂血症;慢性乙型病毒性肝炎;肺结核瘤;颈动脉硬化;下肢动脉粥样硬化;脂肪肝;前列腺结石;后天性肾囊肿;骨折术后;高血压	好转	赵艳玲	陈琰	陈瑶慧
790	C11肾内科	2024-03-16	2024-03-18	3484710	董富菊	女	73Y	类风湿性关节炎伴肺间质纤维化	自身免疫性甲状腺炎;甲状腺功能减退症;高血压;痛风;三叉神经痛;下肢动脉粥样硬化;脂肪肝;肺诊断性影像异常;肺大疱;骨折术后;陈旧性肱骨骨折;胆囊切除术后状态	好转	毛朝鸣	郑淑蓓	庄芝芝
791	C11肾内科	2024-03-11	2024-03-20	3485277	董玉钗	女	67Y	泌尿道感染	梗阻性肾病;慢性肾脏病5期;肾性贫血;肾挛缩;高血压;甲状腺恶性肿瘤个人史;骨折术后	好转	李占园	潘敏	潘敏
792	C11肾内科	2024-03-24	2024-03-25	3486640	滕显娟	女	67Y	系统性红斑狼疮，累及器官或系统	间质性肺炎;支气管哮喘;肺动脉高压中度;肺大疱;高血压;胆囊结石;后天性肾囊肿;肾结石;颈动脉硬化;下肢动脉粥样硬化;陈旧性肋骨骨折	好转	毛朝鸣	郑淑蓓	金怡
793	C11肾内科	2024-03-17	2024-03-25	3486696	毛瑞生	男	68Y	高血压性肾衰竭	2型糖尿病;肺部感染;骨折术后;脑梗死后遗症;前列腺增生;肺诊断性影像异常;淋巴结增大	好转	赵艳玲	陈琰	郑群
794	C11肾内科	2024-03-17	2024-04-10	3491291	钟爱兰	女	74Y	ANCA相关性肾炎	ANCA相关性血管炎;肾性贫血;肺部感染;肝功能检查的异常结果;横纹肌溶解症;高血压;骨密度和结构其他特指的疾患;胆囊息肉;下肢动脉粥样硬化;颈动脉硬化;锁骨下动脉粥样硬化;不完全性右束支传导阻滞;肺诊断性影像检查的异常所见;多发性脑梗死;陈旧性肋骨骨折	好转	周志宏	张益前	陈瑶慧
795	C11肾内科	2024-03-30	2024-04-14	3492298	薛敏	男	65Y	心功能不全	痛风性肾病;慢性肾脏病5期;肾性骨病;痛风性关节炎;高血压性心脏病;高脂血症;胫前动脉闭塞;颈动脉硬化;下肢动脉粥样硬化;锁骨下动脉粥样硬化;肺诊断性影像检查的异常所见;陈旧性肋骨骨折;多发性肝囊肿;后天性肾囊肿;肾结石;前列腺结石;心脏肥大	好转	周志宏	张益前	陈瑶慧
796	C11肾内科	2024-03-19	2024-04-17	3493711	汪丐洪	男	69Y	2型糖尿病肾病V期	2型糖尿病;血液透析;高血压心脏和肾脏病伴有肾衰竭;冠状动脉支架植入后状态;完全性右束支传导阻滞;颈动脉硬化;多发性脑梗死;肺诊断性影像检查的异常所见;上颌窦炎;骨折术后;陈旧性肋骨骨折;肾结石;肺部感染;为肾透析的动静脉造瘘;为肾透析的静脉插管;为肾透析的临时静脉拔管	好转	李占园	潘敏	黄文文	为肾透析的动静脉造瘘术;血液透析;为肾透析半永久静脉插管术;为肾透析的临时静脉插管术;为肾透析的临时静脉导管拔管
797	C11肾内科	2024-04-23	2024-04-24	3495992	滕显娟	女	67Y	系统性红斑狼疮，累及器官或系统	间质性肺炎;支气管哮喘;高血压;胆囊结石;后天性肾囊肿;肾结石;颈动脉硬化;下肢动脉粥样硬化;陈旧性肋骨骨折	好转	郑育	陈琰	徐晓燕2
798	C11肾内科	2024-04-21	2024-05-04	3498680	翁樨樨	女	80Y	2型糖尿病肾病V期	2型糖尿病;高血压心脏和肾脏病伴有肾衰竭;高钾血症;肾性贫血;肺部感染;肾恶性肿瘤;骨继发恶性肿瘤;肿瘤性病理性骨折;胆囊结石;后天性肾囊肿;膀胱憩室;下肢动脉粥样硬化;腘动脉狭窄;胫前动脉狭窄;手术后状态，其他特指的	好转	李占园	潘敏	黄文文
799	C11肾内科	2024-04-16	2024-05-05	3498904	王美英	女	77Y	肾透析的人工血管血栓形成	高血压性肾衰竭;慢性肾脏病5期;血液透析;脓毒血症;慢性胆囊炎;腔隙性脑梗死;甲状腺功能减退症;痛风;骨质疏松;腰椎骨折;手术后状态，其他特指的	好转	郑育	陈琰	徐晓燕2	动静脉造瘘后球囊扩张(用于肾透析);下肢静脉造影;下肢静脉置管溶栓术;动静脉造瘘后球囊扩张(用于肾透析);下肢静脉造影;下肢静脉置管溶栓术;血液透析
800	C11肾内科	2024-05-08	2024-05-12	3500517	董夫奎	男	61Y	慢性肾功能不全	ANCA相关性肾炎;痛风;高血压性心脏病;颈动脉硬化;下肢动脉粥样硬化;高胆固醇血症;高脂血症;肝结节;肺诊断性影像检查的异常所见;肺大疱;肝囊肿;后天性肾囊肿;前列腺增生;骨密度和结构其他特指的疾患;陈旧性肋骨骨折;血管瘤	好转	郑淑蓓	郑淑蓓	金怡
801	C11肾内科	2024-05-09	2024-05-12	3500540	赵彩凤	女	61Y	重叠综合征，其他的	系统性红斑狼疮，累及器官或系统;类风湿性关节炎，累及其他器官和系统;间质性肺炎;肺动脉高压;继发性高血压;脂肪肝;高脂血症;甲状腺囊肿;甲状腺结节;肺诊断性影像检查的异常所见;甲状腺术后;骨折术后;阑尾术后	好转	郑淑蓓	郑淑蓓	金怡
802	C11肾内科	2024-05-21	2024-05-22	3503970	林鹤群	男	51Y	2型糖尿病肾病III期	2型糖尿病性视网膜病变;2型糖尿病性周围神经病;2型糖尿病性周围血管病变;2型糖尿病性心肌病;高脂血症;颈动脉硬化;下肢动脉粥样硬化;脂肪肝;前列腺结石;后天性肾囊肿;陈旧性肺结核;高血压;骨折术后	好转	郑育	陈琰	徐晓燕2
803	C11肾内科	2024-04-22	2024-05-22	3503983	李阿月	女	60Y	慢性肾脏病5期	慢性肾小球肾炎;血液透析;自身免疫性溶血性贫血;腰椎骨折L4;骨质疏松;高血压;头皮血肿;多处挫伤;肾性贫血;胸腔积液;脑梗死后遗症;后天性肾囊肿	好转	郑育	陈琰	徐晓燕2	血液透析
804	C11肾内科	2024-05-13	2024-05-26	3505097	薛敏	男	65Y	慢性肾脏病5期	痛风性肾病;为肾透析的动静脉造瘘;肾性贫血;肾性骨病;心功能不全;上呼吸道感染;高血压性心脏病;高脂血症;下肢动脉闭塞;颈动脉硬化;下肢动脉粥样硬化;锁骨下动脉粥样硬化;陈旧性肋骨骨折;多发性肝囊肿;后天性肾囊肿;肾结石;前列腺结石;心脏肥大;肺诊断性影像检查的异常所见	好转	周志宏	张益前	郑群	为肾透析的动静脉造瘘术
805	C11肾内科	2024-05-26	2024-05-27	3505469	滕显娟	女	68Y	系统性红斑狼疮，累及器官或系统	间质性肺炎;骨质疏松;支气管哮喘;高血压;胆囊结石;后天性肾囊肿;肾结石;颈动脉硬化;下肢动脉粥样硬化;陈旧性肋骨骨折	好转	郑淑蓓	郑淑蓓	金怡
806	C11肾内科	2024-05-10	2024-06-04	3507899	董金林	男	79Y	慢性肾脏病5期	梗阻性肾病;血液透析;重度贫血;肺部感染;消化道出血;高血压;2型糖尿病;心房颤动;痛风;前列腺增生;下肢动脉硬化闭塞症;下肢动脉粥样硬化;颈动脉硬化;肾结石;骨折术后;腔隙性脑梗死;脂肪肝;肝囊肿;后天性肾囊肿;前列腺结石;锁骨下动脉粥样硬化	好转	周志宏	张益前	陈瑶慧	血液透析;为肾透析的临时静脉插管术;为肾透析半永久静脉插管术;为肾透析的临时静脉导管拔管
807	C11肾内科	2024-06-02	2024-06-08	3508877	吕包洲	男	63Y	慢性肾脏病5期	慢性肾小球肾炎;腹膜透析;肾性高血压;肾性贫血;高磷血症;慢性肾衰竭(肾功能不全)合并继发性甲状旁腺功能亢进;诊断性影像检查的异常所见，其他特指身体结构的;老年性心脏瓣膜病;二尖瓣及主动脉瓣狭窄;慢性乙型病毒性肝炎;肝硬化;腰椎压缩性骨折;腰椎间盘突出;脊椎退行性病变	好转	郑淑蓓	郑淑蓓	黄文文	腹膜透析
808	C11肾内科	2024-06-01	2024-06-19	3512915	叶顺清	男	74Y	股骨颈骨折	慢性肾小球肾炎;慢性肾脏病5期;血液透析;退行性主动脉瓣疾患;二尖瓣及主动脉瓣关闭不全;肺动脉高压重度;心功能III级(NYHA分级);心脏和冠状循环诊断性影像检查的异常所见;肺部感染;泌尿道感染;胸腔积液;后天性肾囊肿;前列腺钙化灶;肝囊肿;肺大疱	好转	郑育	陈琰	徐晓燕2	髋关节部分置换;髋关节滑膜切除术;髋轴面，陶瓷与金属;为肾透析的动静脉造瘘术;血液透析;为肾透析的临时静脉插管术;为肾透析的临时静脉导管拔管;为肾透析半永久静脉插管术
809	C11肾内科	2024-06-22	2024-06-30	3516239	虞洪魁	男	86Y	癫痫	肺部感染;高血压性肾衰竭;血液透析;2型糖尿病肾病V期;腔隙性脑梗死;冠状动脉粥样硬化性心脏病;心功能不全;骨折术后;痛风;骨密度和结构其他特指的疾患;腰椎间盘突出;后天性肾囊肿;冠状动脉支架植入后状态;动脉粥样硬化;2型糖尿病	好转	周志宏	潘敏	陈瑶慧	血液透析
810	C11肾内科	2024-06-02	2024-07-01	3516400	薛敏	男	66Y	慢性肾衰竭(肾功能不全)合并心力衰竭	痛风性肾病;血液透析;为肾透析的静脉插管;颈动脉硬化;肾性贫血;肾性骨病;锁骨下动脉粥样硬化;高血压性心脏病;高脂血症;胫前动脉闭塞;下肢动脉粥样硬化;肺部阴影;陈旧性肋骨骨折;多发性肝囊肿;后天性肾囊肿;肾结石;前列腺结石;肺部感染	好转	周志宏	张益前	潘敏	血液透析;为肾透析的临时静脉插管术
811	C11肾内科	2024-06-14	2024-07-02	3516672	李阿月	女	60Y	肺部感染	心力衰竭;慢性肾小球肾炎;慢性肾脏病5期;血液透析;自身免疫性溶血性贫血;甲状腺功能减退症;腰椎骨折;骨质疏松;高血压;多处挫伤;胸腔积液;心包积液;盆腔积液;后天性肾囊肿;脑梗死后遗症	好转	郑淑蓓	郑淑蓓	黄文文	血液透析
812	C11肾内科	2024-07-03	2024-07-14	3521207	侯沛珍	女	51Y	类风湿性关节炎	贫血;原发性血小板增多症;病理性骨折，不可归类在他处者;膝关节积液;下肢动脉粥样硬化;脂肪肝;胆囊结石	好转	周志宏	张益前	陈瑶慧	骨髓穿刺术;骨髓活组织检查
813	C11肾内科	2024-07-04	2024-07-23	3524581	钱雪松	男	71Y	慢性肾脏病5期	多囊肾;骨质疏松伴有病理性骨折;血液透析;2型糖尿病;前列腺恶性肿瘤;泌尿道感染;高血压性心脏病;肺大疱;颈动脉硬化;下肢动脉粥样硬化;下肢静脉血栓形成;肾术后	好转	毛朝鸣	徐晓燕2	黄文	血液透析
814	C11肾内科	2024-07-08	2024-07-27	3525956	吴艺影	女	62Y	双踝骨折	踝关节损伤;距骨骨折;骰骨骨折;骨质疏松;慢性肾脏病5期;肾性贫血;高钾血症;高血压;肝功能检查的异常结果;肺部阴影;脂肪肝;后天性肾囊肿;慢性乙型病毒性肝炎	好转	周志宏	潘敏	陈瑶慧	踝关节骨折切开复位钢板内固定术;踝融合术;石膏托固定术;关节软骨修复术
815	C11肾内科	2024-07-24	2024-07-27	3526074	林鹤群	男	51Y	2型糖尿病性肾病	2型糖尿病性视网膜病变;2型糖尿病性周围神经病;2型糖尿病性周围血管病;2型糖尿病性心肌病;2型糖尿病;后天性肾囊肿;高血压;高脂血症;陈旧性肺结核;颈动脉硬化;下肢动脉粥样硬化;脂肪肝;前列腺结石;骨折术后	好转	毛朝鸣	徐晓燕2	黄文
816	C11肾内科	2024-07-23	2024-07-27	3526094	李成钦	男	52Y	慢性肾脏病4期	慢性肾小球肾炎;肾小球硬化;肾性贫血;高钾血症;痛风;骨折术后;高血压	好转	毛朝鸣	李占园	徐晓燕2
817	C11肾内科	2024-07-21	2024-07-29	3526827	张崇香	女	82Y	痛风性肾病	慢性肾脏病3期;冠状动脉粥样硬化性心脏病;高血压;高脂血症;颈动脉硬化;脂肪肝;低钾血症;骨质疏松;锁骨下动脉粥样硬化;下肢动脉粥样硬化;踝关节滑膜炎;肺部阴影;胆囊结石;腹泻;骨折术后	好转	周志宏	潘敏	陈瑶慧
818	C11肾内科	2024-07-21	2024-08-06	3529762	韩松芽	女	75Y	慢性肾脏病5期	慢性肾小球肾炎;腹膜透析后腹膜炎;血液透析;肾性贫血;腹膜透析管取出;为肾透析的动静脉造瘘;为肾透析的静脉插管;高血压;低蛋白血症;心房颤动;脂肪肝;后天性肾囊肿;肾结石;多发性脑梗死;颈动脉硬化;下肢动脉粥样硬化;骨折术后	好转	郑淑蓓	郑淑蓓	黄文文	腹膜透析管去除;为肾透析的动静脉造瘘术;血液透析;为肾透析的临时静脉插管术;为肾透析的临时静脉导管拔管;为肾透析半永久静脉插管术
819	C11肾内科	2024-08-11	2024-08-12	3532127	高艳	女	53Y	强直性脊柱炎	髋关节置换术后;子宫切除术后状态;后天性肾囊肿;陈旧性肺结核;陈旧性肋骨骨折;肾结石	好转	毛朝鸣	张益前	陈瑶慧
820	C11肾内科	2024-07-27	2024-08-13	3532412	吴章建	男	33Y	高血压心脏和肾脏病同时伴有(充血性)心力衰竭和肾衰竭	血液透析;肾性贫血;继发性甲状旁腺功能亢进;心功能不全;心包积液;腹膜透析管取出;为肾透析的静脉插管;为肾透析的临时静脉拔管;为肾透析的动静脉造瘘;肺部感染;痛风;心房颤动;肺部阴影;脂肪肝;主动脉钙化;冠状动脉粥样硬化;后天性肾囊肿;前列腺结石;陈旧性肋骨骨折;颈动脉硬化	好转	郑淑蓓	郑淑蓓	黄文文	为肾透析的动静脉造瘘术;腹膜透析手工法拔管;为肾透析的临时静脉插管术;为肾透析的临时静脉导管拔管;为肾透析半永久静脉插管术;血液透析
821	C11肾内科	2024-08-17	2024-08-22	3536231	项章绿	女	77Y	人工动静脉瘘狭窄	血液透析;慢性肾脏病5期;肾性贫血;后天性肾囊肿;骨折术后	好转	郑育	黄文	黄文	为肾透析的动静脉瘘修补术;血液透析
822	C11肾内科	2024-08-24	2024-08-27	3537762	董金林	男	79Y	为肾透析的动静脉造瘘	梗阻性肾衰竭;肾性贫血;血液透析;高血压;2型糖尿病;阵发性心房颤动;肾结石;高尿酸血症;脑梗死后遗症;脂肪肝;肝囊肿;后天性肾囊肿;前列腺增生;前列腺结石;下肢动脉粥样硬化闭塞症;骨折术后;颈动脉硬化;锁骨下动脉粥样硬化	其他	郑育	黄文	黄文	为肾透析的动静脉造瘘术;血液透析
823	C11肾内科	2024-07-31	2024-08-28	3538298	金良德	男	62Y	2型糖尿病肾病V期	2型糖尿病;高血压性心脏病;人工动静脉瘘闭塞;血液透析;骨密度和结构其他特指的疾患;颈动脉硬化;下肢动脉粥样硬化;前列腺增生;陈旧性面骨骨折;心功能不全	好转	郑育	黄文	彭杨培	为肾透析的动静脉瘘修补术;经皮上肢静脉取栓术;血液透析
824	C11肾内科	2024-08-27	2024-08-28	3538578	林鹤群	男	51Y	2型糖尿病性肾病	2型糖尿病性视网膜病变;2型糖尿病性周围神经病;2型糖尿病性周围血管病;2型糖尿病性心肌病;2型糖尿病;高血压;高脂血症;陈旧性肺结核;颈动脉硬化;脂肪肝;前列腺结石;后天性肾囊肿;下肢动脉粥样硬化;骨折术后	好转	赵艳玲	潘敏	陈瑶慧
825	C11肾内科	2024-08-25	2024-09-03	3540474	胡志雅	男	35Y	膜性肾病	代谢综合征;肥胖相关性肾小球肥大症;慢性乙型病毒性肝炎;肝损害;高血压;2型糖尿病;高脂血症;脂肪肝;骨折术后	好转	郑育	黄文	彭杨培	超声引导下肾穿刺活检
826	C11肾内科	2024-08-20	2024-09-04	3540954	黄金香	女	85Y	复杂性尿路感染	甲状腺术后;高血压;痴呆;膀胱憩室;后天性肾囊肿;脑梗死后遗症;陈旧性肺结核;骨质疏松;骨折术后	好转	郑育	黄文	彭杨培
827	C11肾内科	2024-09-07	2024-09-10	3543246	郑金玉	女	71Y	人工动静脉瘘狭窄	2型糖尿病肾病V期;血液透析;2型糖尿病性视网膜病变;2型糖尿病性周围神经病;高血压;颈动脉硬化;肝回声不均;陈旧性肋骨骨折;室性期前收缩;下肢动脉粥样硬化	好转	郑育	黄文	彭杨培	动静脉造瘘后球囊扩张(用于肾透析);下肢静脉造影;血液透析
828	C11肾内科	2024-09-04	2024-09-12	3543940	诸培中	男	64Y	慢性肾脏病5期	慢性间质性肾炎;移植肾无功能;血液透析;冠状动脉粥样硬化性心脏病;冠状动脉支架植入后状态;冠状动脉痉挛;高血压性心脏病;退行性主动脉瓣疾患;二尖瓣主动脉瓣及三尖瓣关闭不全;急性丙型肝炎;陈旧性脑梗死;多发性脑梗死;老年性脑萎缩;骨折术后;颈动脉硬化;下肢动脉粥样硬化	好转	郑淑蓓	郑淑蓓	黄文文	血液透析
829	C11肾内科	2024-09-01	2024-09-15	3545115	王美英	女	77Y	脓毒血症	高血压性肾衰竭;胆囊切除术后状态;多发性脑梗死;甲状腺功能减退症;痛风;骨质疏松伴有病理性骨折;骨折术后;血液透析;脑术后	好转	赵艳玲	潘敏	潘敏	血液透析
830	C11肾内科	2024-08-31	2024-09-16	3545243	柯国明	男	76Y	急性肾功能不全	肺部感染;下肢深静脉血栓形成;高血压;双相情感障碍;肺肿物;肝囊肿;后天性肾囊肿;前列腺增生;前列腺结石;陈旧性肋骨骨折	好转	郑育	黄文	彭杨培
831	C11肾内科	2024-09-11	2024-09-16	3545247	吴娒奶	女	76Y	高血压性肾衰竭	慢性肾脏病3期;2型糖尿病;病态窦房结综合征;具有心脏起搏器;阵发性心房颤动;退行性主动脉瓣疾患;大脑中动脉狭窄;大脑后动脉狭窄;甲状腺结节;腔隙性脑梗死;老年性脑萎缩;上颌窦囊肿;肾错构瘤;高尿酸血症;陈旧性肋骨骨折;二尖(瓣)关闭不全;颈动脉硬化;下肢动脉粥样硬化	好转	赵艳玲	徐晓燕2	林中豪
832	C11肾内科	2024-09-10	2024-09-17	3545888	吴艺影	女	62Y	慢性肾脏病5期	慢性肾小球肾炎;为肾透析的动静脉造瘘;高血压;糖耐量受损;骨折术后;骨质疏松;慢性乙型病毒性肝炎;肺肿物;脂肪肝;后天性肾囊肿	好转	郑淑蓓	郑淑蓓	黄文文	为肾透析的动静脉造瘘术
833	C11肾内科	2024-09-25	2024-09-27	3549623	林鹤群	男	51Y	2型糖尿病性肾病	2型糖尿病;2型糖尿病性视网膜病变;2型糖尿病性周围神经病;2型糖尿病性周围血管病变;2型糖尿病性心肌病;躯干二度烫伤;高血压;高脂血症;慢性乙型病毒性肝炎;陈旧性肺结核;颈动脉硬化;下肢动脉粥样硬化;脂肪肝;前列腺结石;后天性肾囊肿;骨折术后	好转	赵艳玲	潘敏	潘敏
834	C11肾内科	2024-09-16	2024-10-20	3557789	毛征美	男	72Y	慢性肾脏病5期	心功能不全;痛风性肾病;肺部感染;慢性阻塞性肺病;高血压;陈旧性肺结核;频发性室性期外收缩;频发性房性期前收缩;后天性肾囊肿;肾结石;前列腺结石;陈旧性肋骨骨折;血液透析;通气功能障碍;肺大疱	好转	赵艳玲	徐晓燕2	陈瑶慧	血液透析
835	C11肾内科	2024-10-13	2024-10-20	3557971	钟爱兰	女	75Y	ANCA相关性肾炎	慢性肾脏病5期;腹膜透析;肾性贫血;脓毒血症;阵发性心房颤动;高血压;胆囊息肉;下肢动脉粥样硬化;颈动脉硬化;锁骨下动脉粥样硬化;肺大疱;心包积液;胸腔积液;陈旧性肋骨骨折	好转	郑淑蓓	郑淑蓓	黄文文	腹膜透析
836	C11肾内科	2024-10-26	2024-10-27	3560791	林鹤群	男	52Y	2型糖尿病肾病IV期	肾性贫血;2型糖尿病性视网膜病变;2型糖尿病性周围神经病;2型糖尿病性周围血管病变;2型糖尿病性心肌病;2型糖尿病;上呼吸道感染;肩和上肢烧伤;高血压;高脂血症;慢性乙型病毒性肝炎;陈旧性肺结核;颈动脉硬化;下肢动脉粥样硬化;脂肪肝;前列腺结石;后天性肾囊肿;骨折术后	好转	赵艳玲	徐晓燕2	陈瑶慧
837	C11肾内科	2024-10-20	2024-10-29	3561547	王美英	女	77Y	脓毒血症	高血压性肾衰竭;慢性肾脏病5期;血液透析;胆囊切除术后状态;多发性脑梗死;甲状腺功能减退症;痛风;骨质疏松;自发性骨折;手术后状态，其他特指的	好转	赵艳玲	徐晓燕2	陈瑶慧	血液透析
838	C11肾内科	2024-10-29	2024-11-11	3566652	陈进喜	男	74Y	急性肾功能不全	白细胞减少;肝功能不全;2型糖尿病;高血压性视网膜病变;颈动脉硬化;锁骨下动脉粥样硬化;下肢动脉粥样硬化;骨质疏松伴有病理性骨折;手术后状态，其他特指的;肺肿物;甲状腺结节;甲状腺囊肿;矽肺;肺气肿;老年性脑萎缩;脱髓鞘性脑病;前列腺增生;脑缺血灶	好转	赵艳玲	徐晓燕2	陈瑶慧
839	C11肾内科	2024-10-28	2024-11-12	3566938	彭振龙	男	71Y	腹膜透析相关性腹膜炎	慢性肾小球肾炎;慢性肾脏病5期;腹膜透析;胃恶性肿瘤;胸主动脉溃疡;主动脉硬化;肾动脉狭窄;痛风;前列腺结石;高血压性心脏病;陈旧性肺结核;肺动脉高压;后天性肾囊肿;前列腺增生;慢性乙型病毒性肝炎;多发性肝囊肿;胆囊息肉;陈旧性肋骨骨折;锁骨下动脉粥样硬化;下肢动脉粥样硬化	治愈	郑淑蓓	郑淑蓓	黄文文	腹膜透析
840	C11肾内科	2024-11-09	2024-11-16	3568778	叶祝轩	男	75Y	循环系统的其他操作后疾患，不可归类在他处者	内部假体装置、植入物和移植物，其他特指的机械性并发症;2型糖尿病肾病V期;2型糖尿病;血液透析;导管相关性感染;特发性(原发性)高血压;心脏术后;胆囊结石;后天性肾囊肿;肾结石;肺肿物;陈旧性肋骨骨折	好转	赵艳玲	徐晓燕2	陈瑶慧	动静脉造瘘后球囊扩张(用于肾透析);为肾透析的半永久静脉导管拔管;上肢静脉造影;为肾透析半永久静脉插管术;血液透析
841	C11肾内科	2024-11-17	2024-11-18	3569413	高艳	女	53Y	强直性脊柱炎	人工髋关节;子宫切除术后状态;后天性肾囊肿;陈旧性肺结核;陈旧性肋骨骨折	好转	赵艳玲	徐晓燕2	陈瑶慧
842	C11肾内科	2024-11-27	2024-11-28	3573515	林鹤群	男	52Y	2型糖尿病肾病IV期	2型糖尿病;2型糖尿病性视网膜病变;2型糖尿病性周围神经病;2型糖尿病性周围血管病变;2型糖尿病性心肌病;特发性(原发性)高血压;高脂血症;慢性乙型病毒性肝炎;颈动脉硬化;下肢动脉粥样硬化;脂肪肝;陈旧性肺结核;前列腺结石;后天性肾囊肿;臂烧伤;骨折术后	好转	赵艳玲	徐晓燕2	陈瑶慧
843	C11肾内科	2024-11-24	2024-11-30	3574209	董玉钗	女	68Y	梗阻性肾衰竭	肾性贫血;肾挛缩;后天性肾囊肿;肾结石;特发性(原发性)高血压;甲状腺恶性肿瘤个人史;肺肿物;骨折术后;胆囊息肉;下肢动脉粥样硬化;腔隙性脑梗死	好转	郑淑蓓	郑淑蓓	黄文文	腹膜透析腹腔镜法置管术
844	C11肾内科	2024-11-19	2024-12-09	3577623	彭振龙	男	71Y	慢性肾脏病5期	腹膜透析相关性腹膜炎;慢性肾小球肾炎;腹膜透析;胃恶性肿瘤;胃术后;胸主动脉溃疡;主动脉硬化;肾动脉狭窄;痛风;颈动脉硬化;高血压性心脏病;陈旧性肺结核;轻度肺动脉高压;后天性肾囊肿;前列腺增生;前列腺结石;慢性乙型病毒性肝炎;多发性肝囊肿;胆囊息肉;陈旧性肋骨骨折	好转	李占园	徐晓燕2	黄文文	为肾透析的动静脉造瘘术;腹膜透析
845	C11肾内科	2024-12-11	2024-12-19	3581714	董玉钗	女	68Y	慢性肾脏病5期	梗阻性肾病;腹膜透析;肾性贫血;泌尿道感染;后天性肾囊肿;肾结石;高血压;甲状腺恶性肿瘤个人史;肺肿物;骨折术后;胆囊息肉;下肢动脉粥样硬化;腔隙性脑梗死	好转	李占园	徐晓燕2	黄文文	腹膜透析
846	C11肾内科	2024-12-15	2024-12-21	3582393	吕包洲	男	64Y	腹膜透析	慢性肾小球肾炎;慢性肾脏病5期;肾性贫血;肾性高血压;继发性甲状旁腺功能亢进;后天性肾囊肿;主动脉瓣钙化;主动脉瓣狭窄;慢性乙型病毒性肝炎;肝硬化;脾大;腰椎压缩性骨折;骨质疏松;腰椎间盘突出;脊椎退行性病变;颈动脉硬化;下肢动脉粥样硬化;前列腺增生;湿疹	其他	李占园	徐晓燕2	黄文文	腹膜透析
847	C11肾内科	2024-11-26	2024-12-25	3584098	陈碎蕊	女	80Y	急性肾盂肾炎	急性肾衰竭;高钾血症;2型糖尿病;高血压;肺肿物;肋骨骨折;脑萎缩;血液透析;骨关节病	好转	赵艳玲	潘敏	施珍	血液透析
848	C11肾内科	2024-12-08	2024-12-29	3585696	邹建成	男	58Y	2型糖尿病肾病V期	慢性肾脏病5期;血液透析;肾性贫血;2型糖尿病性视网膜病变;继发性甲状旁腺功能亢进;高血压性心脏病;心功能IV级(NYHA分级);皮肤感染;股骨头缺血性坏死;二尖瓣及三尖瓣关闭不全;肺动脉高压重度;心包积液;胸腔积液;慢性淤血性肝损害;低蛋白血症;上肢动脉粥样硬化;骨折术后	好转	李占园	徐晓燕2	黄文文	为肾透析的动静脉造瘘术;为肾透析的临时静脉插管术;为肾透析半永久静脉插管术;为肾透析的临时静脉导管拔管;血液透析
849	C11肾内科	2024-12-22	2024-12-30	3586311	毛征美	男	73Y	慢性肾脏病5期	痛风性肾病;血液透析;肺部感染;心功能不全;特发性(原发性)高血压;慢性阻塞性肺病;结核性胸膜炎;心律失常;房性期前收缩[房性早搏];室性期前收缩;后天性肾囊肿;肾结石;前列腺结石;通气功能障碍;陈旧性肋骨骨折;陈旧性肺结核	好转	赵艳玲	潘敏	施珍	血液透析
850	C11肾内科	2024-12-11	2024-12-31	3586477	董金林	男	80Y	导管相关性感染	败血症;慢性肾脏病5期;梗阻性肾病;血液透析;器质性精神障碍;肾性贫血;特发性(原发性)高血压;2型糖尿病;阵发性心房颤动;高尿酸血症;脑梗死后遗症;脂肪肝;肝囊肿;肾结石;后天性肾囊肿;前列腺增生;下肢动脉粥样硬化闭塞症;颈动脉硬化;下肢动脉粥样硬化;骨折术后	好转	毛朝鸣	张益前	彭杨培	为肾透析的半永久静脉导管拔管;血液透析
851	C11肾内科	2024-12-30	2024-12-31	3586788	林鹤群	男	52Y	2型糖尿病肾病IV期	慢性肾脏病3期;2型糖尿病性视网膜病变;2型糖尿病性周围血管病;2型糖尿病性心肌病;2型糖尿病性周围神经病;颈动脉硬化;下肢动脉粥样硬化;脂肪肝;前列腺结石;后天性肾囊肿;高血压;高脂血症;陈旧性肺结核;骨折术后	好转	赵艳玲	施珍	潘敏
852	D06(ICU)	2023-11-07	2024-01-07	3468408	吕玉妹	女	81Y	股骨下端骨折	肺部感染;呼吸衰竭;胸腔积液;尺骨远端骨折伴桡骨远端骨折;胫骨平台骨折;髌骨骨折;钩骨骨折;胸骨骨折;头皮血肿;颈椎间盘突出;锁骨骨折;肺挫伤;肋骨多处骨折;带状疱疹不伴有并发症;高血压;肠系膜上动脉狭窄;腰椎压缩性骨折;后天性肾囊肿;脂肪肝;老年性骨质疏松	好转	庄荣	戴凌燕	戴凌燕	股骨骨折切开复位钢板内固定术;股骨植骨术;锁骨骨折切开复位钢板内固定术;胫骨骨折切开复位钢板内固定术;关节软骨修复术;胫骨人工骨植骨术;呼吸机治疗[大于等于96小时];气管内插管
853	D06(ICU)	2023-11-29	2024-01-13	3471211	杨秀君	女	35Y	颈椎脱位C4/C5	创伤性截瘫;颈椎骨折;颈椎间盘突出;颈部脊髓损伤;肺不张;肺部感染;胸腔积液	好转	龚裕强	魏大臻	李忠旺	前外侧入路颈椎融合术;2-3个椎骨融合或再融合;颈椎间盘切除术;椎体脊椎融合装置的置入;颅骨牵引术;暂时性气管切开术
854	D06(ICU)	2024-01-12	2024-01-17	3473164	李凤竹	女	50Y	创伤性脑疝	急性创伤性硬脑膜下血肿;多发性大脑挫裂伤;头皮血肿;颞骨骨折;创伤性蛛网膜下腔出血;枕骨骨折	好转	龚裕强	陈建时	陈建时	颅骨去骨瓣减压术;脑病损切除术
855	D06(ICU)	2024-01-21	2024-01-22	3476923	于广勇	男	30Y	创伤性肝破裂	创伤性休克;肺挫伤;脑挫伤;创伤性蛛网膜下腔出血;胆囊损伤;颅腔积气;颅骨多发性骨折;面部裂伤;弥散性血管内凝血;创伤性气胸;腹腔内出血;阴囊损伤;髂骨骨折;耻骨骨折;腰椎骨折;腹部损伤;胸部损伤;肋骨多处骨折;慢性胆囊炎;胆囊出血	死亡	龚裕强	郭献阳	郭献阳	胆囊切除术;小肠裂伤缝合术，除外十二指肠;腹腔冲洗检查;肝破裂修补术;开腹探查术;腹腔切开引流术;阴囊裂伤缝合术;腹膜其他修补术
856	D06(ICU)	2024-01-09	2024-01-26	3477464	黄珠凤	女	83Y	急性心力衰竭	呼吸衰竭;股骨粗隆间骨折;肺部感染;陈旧性耻骨骨折;高血压;2型糖尿病	未愈	庄荣	戴凌燕	戴凌燕	股骨骨折闭合复位髓内针内固定术;呼吸机治疗[大于等于96小时];气管内插管;静脉导管插入术
857	D06(ICU)	2024-01-23	2024-02-02	3478501	蔡牡丹	女	78Y	肺性脑病	Ⅱ型呼吸衰竭;慢性阻塞性肺病伴有急性加重;肺部感染;冠状动脉粥样硬化性心脏病;心房颤动和扑动;高血压;糖尿病不伴有并发症;眼术后;骨折术后	好转	龚裕强	龚裕强	林国梁	锁骨下静脉穿刺中心静脉置管术
858	D06(ICU)	2024-02-10	2024-02-28	3481205	李玉蕉	女	98Y	股骨粗隆间骨折	肺部感染;下肢静脉血栓形成;呼吸衰竭	治愈	龚裕强	林孟相	林孟相	股骨骨折闭合性复位术伴内固定
859	D06(ICU)	2024-01-30	2024-03-11	3483270	杨冬英	女	97Y	股骨粗隆间骨折	多脏器功能衰竭;肺部感染;心脏停搏;气胸;脓毒性休克;肺大疱;骨质疏松;营养不良;呼吸衰竭;循环衰竭;肾衰竭;骨折术后	死亡	龚裕强	郭献阳	郭献阳	股骨骨折闭合复位髓内针内固定术;胸腔闭式引流术;颈内静脉穿刺中心静脉置管术;呼吸机治疗[小于96小时];气管内插管;连续性肾脏替代治疗[CRRT]
860	D06(ICU)	2024-01-20	2024-03-14	3484101	潘姐妹	女	80Y	急性肝衰竭	多脏器功能衰竭;腹腔积液;肺部感染;呼吸衰竭;胸腔积液;消化道出血;急性肾功能不全;胆囊结石;肝胆管扩张;脑梗死;高血压;结核性胸膜炎;肾结石;完全性左束支传导阻滞;足舟骨骨折;下肢动脉粥样硬化;跟骨骨折	死亡	程碧环	程碧环	傅蓓蓓	内镜逆行胰胆管造影[ERCP];呼吸机治疗[小于96小时];气管内插管;血浆置换;血浆置换;内镜逆行胆管造影[ERC];内镜下十二指肠乳头肌切开术(EST);内镜下鼻胆管引流术
861	D06(ICU)	2024-03-09	2024-03-15	3484018	黄晓礼	男	50Y	急性白血病	肺部感染;呼吸衰竭;跖骨骨折	未愈	龚裕强	魏大臻	魏大臻	呼吸机治疗[小于96小时];骨髓穿刺术;气管内插管
862	D06(ICU)	2024-03-22	2024-03-23	3486151	李健	男	29Y	急性创伤性硬脑膜下血肿	创伤性脑疝;脑挫伤;创伤性蛛网膜下腔血肿;创伤性休克;额骨骨折;眶骨骨折;胫骨骨折累及踝关节;跟骨骨折;距骨骨折;足舟骨骨折;楔状骨骨折(足);跖骨骨折;第一肋骨骨折;创伤性湿肺;上颌骨骨折;耻骨骨折;骶骨骨折;腰椎骨折;面部软组织挫伤	未愈	龚裕强	龚裕强	林国梁	颅内血肿清除术;颞肌下减压术;头皮缝合术;硬脑膜补片修补术;经导管髂内动脉栓塞术;腰动脉栓塞术;髂动脉覆膜支架置入术
863	D06(ICU)	2024-04-12	2024-04-14	3492567	周坤妹	女	60Y	急性创伤性硬脑膜下血肿	脑挫伤;创伤性蛛网膜下腔出血;创伤性脑疝;呼吸衰竭;头皮血肿;肋骨多处骨折;颈椎退行性病变;颈椎间盘突出;肝功能不全;肝胆管结石	未愈	龚裕强	王本极	王本极	颅内血肿清除术;呼吸机治疗[小于96小时];颞肌下减压术
864	D06(ICU)	2024-04-24	2024-05-05	3498948	黄忠财	男	51Y	呼吸心跳骤停	中枢性呼吸衰竭;创伤性蛛网膜下腔出血;肾损伤;代谢性酸中毒;肋骨多处骨折;肺部感染;高钾血症;缺血缺氧性肌病;肝损害	死亡	龚裕强	谢媚媚	谢媚媚	呼吸机治疗[大于等于96小时];股静脉穿刺置管术;心肺复苏
865	D06(ICU)	2024-05-14	2024-05-22	3504028	项引弟	女	73Y	创伤性硬膜下出血	创伤性脑疝;创伤性蛛网膜下腔出血;脑挫伤;头皮血肿;颧骨骨折;肺部感染;胸腔积液;陈旧性肋骨骨折;下肢静脉肌间血栓形成;肾错构瘤	好转	庄荣	陈德准	陈德准	颅骨去骨瓣减压术;颅内血肿清除术;硬脑膜补片修补术;脑内血肿清除术;呼吸机治疗[大于等于96小时];气管内插管
866	D06(ICU)	2024-05-22	2024-05-24	3504453	吴洪柳	男	70Y	脑挫伤	创伤性脑疝;创伤性蛛网膜下腔出血;中枢性呼吸衰竭;颅底骨折;吸入性肺炎;冠状动脉粥样硬化性心脏病;急性下壁心肌梗死;脂肪肝;后天性肾囊肿;肾结石;高血压	未愈	程碧环	吴海亚	吴海亚	呼吸机治疗[小于96小时]
867	D06(ICU)	2024-05-17	2024-05-24	3504455	彭清华	男	48Y	创伤性膀胱破裂	髂骨骨折;尾骨骨折;耻骨骨折;骶骨骨折;腰椎骨折L5;骶髂关节脱位;耻骨联合脱位;肝功能不全;腹壁蜂窝织炎;阴囊水肿;脂肪肝;胸腔积液;创伤性休克	未愈	庄荣	戴洲豪	戴洲豪	髂动脉栓塞术;髂动脉造影;膀胱修补术;气管插管去除;呼吸机治疗[大于等于96小时];颈内静脉穿刺中心静脉置管术;锁骨下静脉穿刺中心静脉置管术
868	D06(ICU)	2024-05-28	2024-05-30	3506424	金美花	女	88Y	股骨颈骨折	创伤性硬脑膜下血肿;肺部感染;尺骨茎突骨折伴桡骨远端骨折;高血压;高钾血症;肝损害;急性肾功能不全;慢性支气管炎伴肺气肿	未愈	张晓隆	张晓隆	张晓隆
869	D06(ICU)	2024-05-13	2024-05-31	3506610	黄存总	男	72Y	颅内损伤伴有延长的昏迷	中枢性呼吸衰竭;创伤性硬膜下出血;创伤性脑疝;脑挫伤;创伤性蛛网膜下腔出血;眶骨骨折;鼻骨骨折;上颌骨骨折;肋骨多发性骨折伴第一肋骨骨折;胸椎骨折;腰椎骨折;肺部感染;创伤性胸腔积液;开放性面部损伤;中枢性尿崩症	未愈	龚裕强	傅蓓蓓	傅蓓蓓	颅内血肿清除术;经导管颈部血管弹簧圈栓塞术;呼吸机治疗[大于等于96小时];脑血管造影;颅压监护探极置入术;暂时性气管切开术;气管内插管
870	D06(ICU)	2024-05-18	2024-06-07	3508733	诸葛雪兰	女	89Y	升结肠恶性肿瘤	急性呼吸窘迫综合征;肠梗阻;肺部感染;胸腔积液;老年性痴呆;人工髋关节;陈旧性肋骨骨折;锁骨骨折;后天性肾囊肿;肝囊肿;颈动脉硬化;下肢动脉粥样硬化	好转	龚裕强	傅蓓蓓	傅蓓蓓	右半结肠切除术;肠粘连松解术
871	D06(ICU)	2024-05-11	2024-06-09	3509473	苏正平	男	51Y	多发性腰椎骨折	脑挫伤;创伤性硬膜下出血;创伤性硬脑膜下积液;I型呼吸衰竭;桡骨骨折;创伤性脑脊液漏;眶骨骨折;肠系膜出血;肺挫伤;创伤性胸腔积液;吸入性肺炎;胸椎骨折T3/T4;骶骨骨折;腹腔积液;肱骨远端骨折;肘关节脱位 ;膝挫伤;跖骨骨折;多处挫伤;颈外动脉损伤;肝功能不全;高血压;肺大疱	好转	龚裕强	傅蓓蓓	傅蓓蓓	腰椎骨折切开复位内固定术;椎管减压术;桡骨骨折切开复位螺钉内固定术;桡骨骨折切开复位螺钉内固定术;跖骨骨折切开复位钢板内固定术;创面封闭式负压引流术（VSD);皮肤和皮下坏死组织切除清创术;肘关节固定术;关节软骨修复术
872	D06(ICU)	2024-06-11	2024-06-13	3510979	曾献忠	男	49Y	颅内损伤伴有延长的昏迷	呼吸衰竭;弥散性大脑损伤伴出血;创伤性蛛网膜下腔出血;创伤性脑疝;颞骨骨折;肩胛骨骨折;低钾血症;低磷血症;创伤性硬脑膜下出血;创伤性硬脑膜外血肿;蝶骨骨折;面部挫伤;枕骨骨折;寰椎骨折;颈椎骨折C4;肋骨骨折;髂骨骨折;耻骨骨折;高钠血症	好转	龚裕强	张文武	张文武
873	D06(ICU)	2024-06-10	2024-06-23	3514190	李保昌	男	62Y	创伤性蛛网膜下腔出血	创伤性硬脑膜下血肿;脓毒血症;创伤性脑疝;枕骨骨折;复杂性尿路感染;肺部感染;慢性肾功能不全;输尿管结石;肾挫伤;肾积水伴肾结石;多发性肝囊肿;鲍曼不动杆菌感染;细菌性病原体作为分类于其他章疾病的原因，其他特指的	好转	龚裕强	吴海亚	吴海亚	颅骨去骨瓣减压术;颅内血肿清除术
874	D06(ICU)	2024-06-24	2024-06-28	3515577	马占国	男	49Y	颅内损伤伴有延长的昏迷	创伤性脑疝;创伤性硬脑膜外出血;创伤性硬脑膜下血肿;创伤性蛛网膜下腔出血;颈椎骨折C5;创伤性胸腔积液;中枢性尿崩症;中枢性呼吸衰竭;额骨骨折;创伤性湿肺;顶骨骨折;蝶骨骨折;眶骨骨折;肝囊肿;后天性肾囊肿;肩胛骨骨折	未愈	龚裕强	魏大臻	魏大臻	颅内血肿清除术;颅骨去骨瓣减压术;气管内插管;呼吸机治疗[大于等于96小时]
875	D06(ICU)	2024-05-23	2024-06-28	3515871	周彩微	女	51Y	创伤性蛛网膜下腔血肿	多发性腰椎骨折;创伤性休克;骶骨骨折;开放性胫腓骨干骨折;中枢性尿崩症;肋骨骨折;创伤性湿肺;髂骨骨折;腰椎椎管狭窄;脑血管意外;颞骨骨折	死亡	龚裕强	魏大臻	魏大臻	腰椎骨折切开复位内固定术;胸腔闭式引流术;胫骨骨折切开复位钢板内固定术;呼吸机治疗[大于等于96小时];气管内插管
876	D06(ICU)	2024-06-01	2024-06-29	3515885	叶诗琴	女	15Y	腰椎骨折	弥漫性轴索损伤;股骨粗隆下骨折;脑挫伤;创伤性休克;肝损伤;腰骶神经根损伤;肋骨骨折;症状性癫痫[继发性癫痫];跖骨骨折;肺部感染;泌尿道感染;肝功能不全;盆腔积液;肺挫伤;腰椎骨折	治愈	庄荣	戴凌燕	戴凌燕	股骨骨折闭合复位髓内针内固定术;经导管髂内动脉栓塞术;暂时性气管切开术;呼吸机治疗[大于等于96小时];气管内插管;脊神经根减压术;腰椎椎体间融合术，后入路;锁骨下静脉穿刺中心静脉置管术;2-3个椎骨融合或再融合;椎体脊椎融合装置的置入
877	D06(ICU)	2024-06-30	2024-07-01	3516556	王顺柳	女	71Y	创伤性血气胸	创伤性休克;多脏器功能衰竭;胸椎横突骨折;腰椎骨折;骶骨骨折;肋骨多发性骨折伴第一肋骨骨折;锁骨骨折;肩胛骨骨折;创伤性膀胱破裂;创伤性湿肺;颧骨骨折;眶骨骨折;面部软组织挫伤;肾结石;后天性肾囊肿;耻骨骨折	死亡	庄荣	陈德准	陈德准	经导管髂内动脉栓塞术;胸主动脉造影;呼吸机治疗[小于96小时]
878	D06(ICU)	2024-07-06	2024-07-06	3518321	林周翠	女	74Y	创伤性脑疝	弥散性大脑损伤伴出血;创伤性休克;创伤性蛛网膜下腔出血;枕骨骨折;创伤性硬脑膜下血肿;股骨骨折;骨盆骨折;创伤性凝血病;代谢性酸中毒;肺大疱;肝囊肿;盆腔囊肿;陈旧性肋骨骨折	未愈	庄荣	庄荣	戴洲豪	颅内血肿清除术;颅骨去骨瓣减压术;呼吸机治疗[小于96小时]
879	D06(ICU)	2024-07-03	2024-07-06	3518704	施赛英	女	76Y	弥散性大脑损伤伴出血	中枢性呼吸衰竭;创伤性脑疝;多发性大脑挫裂伤;创伤性硬膜下出血;创伤性蛛网膜下腔出血;头皮血肿;冠状动脉粥样硬化性心脏病;甲状腺结节;肋骨多处骨折;后天性肾囊肿;循环衰竭	死亡	庄荣	陈德准	陈德准	颅内血肿清除术;颅骨去骨瓣减压术;气管内插管;呼吸机治疗[小于96小时]
880	D06(ICU)	2024-07-11	2024-07-13	3520895	徐凤英	女	70Y	颅内损伤伴有延长的昏迷	呼吸衰竭;四根以上肋骨骨折不伴第一肋骨骨折;创伤性蛛网膜下腔出血;头皮血肿;创伤性脑水肿;创伤性硬脑膜下血肿;颈椎退行性病变;颈椎间盘突出	未愈	庄荣	戴凌燕	张文武	颅骨去骨瓣减压术;颅内血肿清除术
881	D06(ICU)	2024-07-19	2024-07-19	3523578	景小军	男	46Y	髂骨骨折	创伤性休克;肺挫伤;胸腔积液;肝挫伤;腹腔积液;肩胛骨骨折;腰椎骨折;肋骨多处骨折;股骨粗隆间骨折;耻骨骨折;肾结石	死亡	张晓隆	张晓隆	张晓隆	髂动脉栓塞术;髂动脉造影;肾动脉栓塞术;呼吸机治疗[小于96小时];气管内插管
882	D06(ICU)	2024-07-19	2024-07-27	3526254	潘建义	男	40Y	开放性颅内损伤伴长时间昏迷	创伤性硬脑膜外血肿;创伤性脑疝;开放性额骨骨折;肺部感染;脑梗死	未愈	龚裕强	谢媚媚	谢媚媚	气管内插管;呼吸机治疗[大于等于96小时];气管镜肺灌洗术;颅内血肿清除术;颅骨去骨瓣减压术;大脑病损或组织的其他切除术或破坏术;颅骨骨折清创术;硬脑膜缺损修补术
883	D06(ICU)	2024-07-02	2024-08-03	3528652	乐金环	女	71Y	下肢动脉粥样硬化性坏疽	慢性肾脏病5期贫血;血液透析;癫痫;下肢软组织感染;周围血管支架植入术后状态;胆总管结石;陈旧性肋骨骨折;颈动脉硬化;肝囊肿;脾大;后天性肾囊肿;肾结石;胆管扩张	好转	庄荣	林孟相	林孟相	膝关节离断术;创面封闭式负压引流术（VSD);血液透析;连续性肾脏替代治疗[CRRT]
884	D06(ICU)	2024-07-06	2024-08-03	3529044	董如松	男	65Y	股骨粗隆下骨折	消化道出血;创伤性休克;腹股沟损伤;创伤后伤口感染;脂肪栓塞(创伤性);骨盆骨折;脑梗死，其他的;肛门损伤;鼻骨骨折;下肢静脉肌间血栓形成;多发性腰椎骨折;肺部感染;肺大疱;开放性臀部损伤;骨盆肌肉损伤;肋骨多处骨折	死亡	龚裕强	龚裕强	胡建坚	股骨骨折闭合复位髓内针内固定术;经导管髂内动脉栓塞术;髌骨骨折切开复位张力带钢丝内固定术;皮肤和皮下坏死组织切除清创术;创面封闭式负压引流术（VSD);关节软骨修复术;肛门成形术;肛门裂伤缝合术;结肠造口术;开腹探查术;皮肤和皮下坏死组织切除清创术
885	D06(ICU)	2024-08-30	2024-09-01	3540063	程波妹	女	85Y	椎动脉动脉瘤破裂伴蛛网膜下腔出血	腔隙性脑梗死;主动脉钙化;肺部感染;肋骨骨折;后天性肾囊肿;低钾血症;老年性脑萎缩;颈动脉硬化	好转	龚裕强	郭献阳	李慧3	引导下中心静脉置管术;脑血管造影;经导管颅内动脉瘤栓塞术;脑室钻孔引流术
886	D06(ICU)	2024-09-02	2024-09-02	3540802	刘朝令	男	41Y	骨盆骨折	创伤性髂动脉破裂;呼吸心跳骤停;失血性休克;腹腔间隔室综合征;髋周软组织损伤;腹腔积液;肋骨骨折;气胸;肺挫伤;眶骨骨折;肌腱和肌肉损伤	死亡	林孟相	林孟相	林孟相	开腹探查术;髂动脉造影;髂动脉栓塞术;腹主动脉球囊阻断术
887	D06(ICU)	2024-09-16	2024-09-17	3545923	刘香牙	女	83Y	创伤性蛛网膜下腔出血	创伤性硬脑膜下出血;多发性大脑挫裂伤;创伤性脑疝;肋骨骨折;锁骨骨折;失血性休克;胆囊结石;骨折术后	未愈	龚裕强	龚裕强	胡建坚	脑膜切开伴硬脑膜下腔血肿清除术;颅骨去骨瓣减压术
888	D06(ICU)	2024-09-16	2024-09-17	3545925	杨韩英	女	45Y	创伤性蛛网膜下腔出血	创伤性硬脑膜下出血;创伤性脑疝;颞骨骨折;枕骨骨折;肋骨骨折;肺不张;恢复期，其他治疗后的	未愈	龚裕强	龚裕强	胡建坚	呼吸机治疗[小于96小时]
889	D06(ICU)	2024-09-18	2024-09-22	3547744	舒天航	男	18Y	创伤性髂动脉破裂	骶骨骨折;失血性休克;髋臼骨折;耻骨骨折;急性失血性贫血;血小板减少;腹腔积液;腰椎骨折;桡骨远端骨折;尺骨骨折;足舟状骨骨折;低蛋白血症;肺挫伤;骨盆肌肉损伤;胸腔积液;腰骶椎骨骨折;腕部开放性损伤	未愈	庄荣	高叶	高叶	经导管髂内动脉栓塞术;腹主动脉造影;颈内静脉穿刺中心静脉置管术;胸腔闭式引流术;腰动脉栓塞术
890	D06(ICU)	2024-09-19	2024-09-22	3547777	朱启冲	男	57Y	创伤性蛛网膜下腔出血	创伤性闭合性硬膜外血肿;脑挫伤;创伤性小脑出血;枕骨骨折;皮下血肿;肺部感染;胸腔积液;下肢深静脉血栓形成	未愈	庄荣	高叶	戴洲豪	脑膜切开伴硬脑膜下腔血肿清除术;颅骨钻孔减压术;呼吸机治疗[小于96小时];气管内插管;颈内静脉穿刺中心静脉置管术
891	D06(ICU)	2024-08-31	2024-09-24	3548601	高燕来	女	87Y	肺部感染	呼吸衰竭;感染性休克;阿尔茨海默病;骨髓增生异常综合征;骨质疏松;特发性(原发性)高血压;血小板减少;病理性骨折，不可归类在他处者;高脂血症;肺诊断性影像异常;胆囊结石;后天性肾囊肿;锁骨下动脉粥样硬化;颈动脉硬化;下肢动脉粥样硬化	死亡	庄荣	陈建时	陈建时	气管内插管
892	D06(ICU)	2024-10-02	2024-10-13	3555172	董天宇	男	57Y	创伤性硬脑膜下血肿	创伤性脑疝;创伤性蛛网膜下腔血肿;多发性大脑挫裂伤;蝶骨骨折;颞骨骨折;头皮血肿;帕金森病;多发性脑梗死;特发性(原发性)高血压;2型糖尿病;肺部感染;胆囊息肉	好转	庄荣	王本极	王本极	脑膜切开伴硬脑膜下腔血肿清除术;颅骨去骨瓣减压术;呼吸机治疗[大于等于96小时]
893	D06(ICU)	2024-10-16	2024-10-19	3557500	胡美球	女	65Y	创伤性硬脑膜下出血	创伤性蛛网膜下腔出血;创伤性脑出血;创伤性小脑血肿;肺部感染;肋骨骨折;下肢深静脉血栓形成;后天性肾囊肿	未愈	庄荣	戴洲豪	戴洲豪	气管内插管;颈内静脉穿刺中心静脉置管术;呼吸机治疗[大于等于96小时]
894	D06(ICU)	2024-09-07	2024-10-19	3557533	阮红菊	女	83Y	十二指肠动态未定肿瘤	急性肾功能不全;梗阻性黄疸;腹腔感染;泌尿道感染;脓毒血症;脓毒性休克;血液透析;肺部感染;成人型呼吸窘迫综合征;Ⅱ型呼吸衰竭;继发性血小板减少;胸腔积液;高胆红素血症;慢性胃炎;胆囊结石;肠系膜脂肪炎;肋骨骨折;下肢动脉粥样硬化;甲状腺囊肿;甲状腺结节	好转	庄荣	王本极	戴洲豪	胆管肝管空肠吻合术;胆囊切除术;肠粘连松解术;气管内插管;呼吸机治疗[大于等于96小时];心肺复苏;颈内静脉穿刺中心静脉置管术;股静脉穿刺置管术;连续性肾脏替代治疗[CRRT];无创机械性通气;超声引导下胸腔穿刺术;颈内静脉穿刺中心静脉置管术;为肾透析的临时静脉插管术
895	D06(ICU)	2024-10-20	2024-10-26	3560391	陈雨林	男	46Y	肺部感染	创伤性硬脑膜外出血;颧骨骨折;上颌骨骨折;眶骨骨折;颈椎骨折C7;出血性脑梗死;肾上腺肿物;胆囊息肉	治愈	庄荣	陈建时	戴洲豪	纤维支气管镜检查伴肺泡灌洗术;气管内插管;呼吸机治疗[小于96小时];颈内静脉穿刺中心静脉置管术;纤维支气管镜检查伴肺泡灌洗术;纤维支气管镜检查伴肺泡灌洗术;气管内插管
896	D06(ICU)	2024-10-28	2024-10-29	3561433	谢长春	男	62Y	创伤性硬膜下出血	创伤性脑疝;开放性脑挫伤;创伤性蛛网膜下腔出血;颅腔积气;眶骨骨折;颅底骨折;胸椎骨折T11/T12;耻骨骨折	未愈	程碧环	王本极	王本极
897	D06(ICU)	2024-10-22	2024-11-09	3565907	胡太生	男	76Y	胸椎多处骨折	神经源性休克;脊髓损伤;肋骨骨折;呼吸衰竭;肺部感染;创伤性皮下气肿;气胸;胸腔积液;下肢静脉血栓形成;多发性脑梗死;膀胱结石;前列腺增生;老年性脑萎缩	治愈	龚裕强	龚裕强	李慧3	呼吸机治疗[大于等于96小时];股静脉穿刺置管术;胸腔闭式引流术;胸腔闭式引流术;气管内插管
898	D06(ICU)	2024-11-05	2024-11-12	3567291	杨昌志	男	40Y	创伤性蛛网膜下腔出血	开放性脑挫伤;创伤性脑疝;失血性休克;多处开放性伤口;创伤性血气胸;肺挫伤;呼吸衰竭;创伤性皮下气肿;气胸;肋骨骨折;肩胛骨骨折;循环衰竭;脊柱骨折;髋臼骨折;髋关节脱位;腹腔积液;肝损伤;肺部感染;急性呼吸窘迫综合征	死亡	龚裕强	陈如杰	周王锋	脑室钻孔引流术;颅压监护探极置入术;胸腔镜下肺修补术;胸腔闭式引流术;呼吸机治疗[大于等于96小时];股静脉穿刺置管术;腹腔穿刺引流术
899	D06(ICU)	2024-11-13	2024-11-13	3568130	余增荣	男	69Y	创伤性硬脑膜下出血	呼吸心跳骤停;创伤性脑疝;创伤性脑出血;中枢性呼吸衰竭;颅骨骨折;颅腔积气	死亡	林孟相	林孟相	林孟相	颅内血肿清除术;颅骨去骨瓣减压术;呼吸机治疗[小于96小时]
900	D06(ICU)	2024-11-10	2024-11-17	3569260	黄淼兴	男	77Y	缺氧缺血性脑病	脑死亡;心脏停搏复苏成功;冠状动脉粥样硬化性心脏病;血液透析;2型糖尿病;高血压;老年性脑萎缩;肺部感染;肺气肿;液气胸;肺不张;肺的其他疾患;包裹性胸腔积液;后天性肾囊肿;肋骨骨折	死亡	张晓隆	张晓隆	张晓隆	锁骨下静脉穿刺中心静脉置管术;气管内插管;呼吸机治疗[大于等于96小时];为肾透析的临时静脉插管术;股动脉穿刺术;心肺复苏;锁骨下静脉穿刺中心静脉置管术;连续性肾脏替代治疗[CRRT]
901	D06(ICU)	2024-11-18	2024-11-18	3569990	袁先梅	女	55Y	创伤性硬脑膜下出血	创伤性脑疝;脑挫伤;颅骨骨折;头皮血肿;肋骨骨折;肾挫伤;中枢性呼吸衰竭;循环衰竭;创伤性凝血病;重度贫血;低蛋白血症	死亡	林孟相	傅蓓蓓	傅蓓蓓	脑膜切开伴硬脑膜下腔血肿清除术;颅骨去骨瓣减压术;呼吸机治疗[小于96小时];心肺复苏;气管内插管
902	D06(ICU)	2024-11-23	2024-11-23	3571616	王志华	男	26Y	创伤性胰腺破裂	失血性休克;多处开放性伤口;十二指肠损伤;肠系膜损伤;创伤性胃破裂;肝挫伤;头皮开放性伤口;心脏停搏;股骨骨折;额骨骨折;多处挫伤;颈椎骨折	死亡	龚裕强	王本极	王本极	胰腺部分切除术;开腹探查术;结肠部分切除术;胃破裂修补术;回肠造口术;空肠造口术;腹腔切开引流术;皮肤和皮下坏死组织切除清创术;股骨骨折闭合复位螺钉内固定术;气管内插管;呼吸机治疗[小于96小时];心肺复苏
903	D06(ICU)	2024-11-10	2024-11-26	3572924	张萧宇	男	17Y	创伤性硬脑膜下出血	创伤性脑疝;创伤性硬脑膜外出血;创伤性蛛网膜下腔出血;颅骨多发性骨折;创伤性脑损伤;尿崩症;循环衰竭;中枢性呼吸衰竭;额骨骨折;肺部感染;气胸;肾结石;额窦骨折;筛窦骨折;上颌窦骨折	死亡	林孟相	傅蓓蓓	傅蓓蓓	脑膜切开伴硬脑膜下腔血肿清除术;颅骨去骨瓣减压术;呼吸机治疗[大于等于96小时];气管内插管;支气管镜下诊断性支气管肺泡灌洗[BAL];支气管镜下诊断性支气管肺泡灌洗[BAL];纤维支气管镜检查伴肺泡灌洗术
904	D06(ICU)	2024-10-25	2024-11-28	3573657	豆兴文	男	48Y	创伤性硬脑膜外出血	创伤性脑疝;开放性脑挫伤;创伤性蛛网膜下腔出血;颞骨骨折;肺部感染	好转	张晓隆	张晓隆	张晓隆	硬脑膜外血肿清除术;颅骨去骨瓣减压术;气管内插管;呼吸机治疗[大于等于96小时];颈内静脉穿刺中心静脉置管术
905	D06(ICU)	2024-10-07	2024-12-04	3575971	李爱琴	女	46Y	肠坏死	腹腔间隔室综合征;急性腹膜炎;感染性休克;多处开放性伤口;足部皮肤撕裂伤;肝挫伤;趾骨骨折;跖骨骨折;骨盆骨折;失血性休克;头皮血肿;肺部感染;胸腔积液;腹腔积血;肾结石	治愈	庄荣	高叶	高叶	跖骨开放性骨折清创术;足血管、神经、肌腱探查术;趾骨骨折切开复位钢针内固定术;下肢植皮术;髂动脉造影;腹腔干动脉造影;肠系膜上动脉造影;肠系膜下动脉造影;经导管髂内动脉栓塞术;经导管肝动脉栓塞术;呼吸机治疗[大于等于96小时];气管内插管;胸腔穿刺抽液术
906	D06(ICU)	2024-12-08	2024-12-11	3578852	陈勇	男	27Y	创伤性硬脑膜下出血	创伤性脑疝;创伤性蛛网膜下腔出血;脑挫伤;颞骨骨折;颅底骨折;顶骨骨折;头部多处浅表损伤	未愈	龚裕强	王本极	王本极	脑膜切开伴硬脑膜下腔血肿清除术;呼吸机治疗[小于96小时];颅骨去骨瓣减压术;气管内插管
907	D06(ICU)	2024-12-18	2024-12-20	3582236	程建成	男	54Y	消化道出血	失血性休克;重度贫血;低蛋白血症;肺诊断性影像异常;截瘫;陈旧性肋骨骨折	未愈	龚裕强	周王锋	周王锋	胃镜检查;气管内插管;呼吸机治疗[小于96小时]
908	D06(ICU)	2024-12-14	2024-12-25	3584473	陶校兵	男	59Y	创伤性硬膜下出血	多发性大脑挫裂伤;创伤性蛛网膜下腔出血;创伤性脑疝;枕骨骨折;四根以上肋骨骨折不伴第一肋骨骨折;肾结石	未愈	林孟相	林孟相	林孟相	脑膜切开伴硬脑膜下腔血肿清除术;颅骨去骨瓣减压术;脑膜切开伴硬脑膜下腔血肿清除术;颅骨去骨瓣减压术;呼吸机治疗[大于等于96小时];气管内插管
909	D06(ICU)	2024-12-23	2024-12-27	3585024	吴爱娟	女	81Y	创伤性肋间动脉破裂	创伤性血胸;股骨颈骨折;失血性休克;心脏停搏复苏成功;多脏器功能衰竭;呼吸衰竭;急性肾功能不全;代谢性酸中毒;肋骨多处骨折;凝血功能障碍;肝功能不全;2型糖尿病;类风湿性关节炎;肺部感染;腔隙性脑梗死;骨质疏松;脊柱侧弯;胸椎压缩性骨折;腰椎压缩性骨折;腰椎间盘突出	好转	郭献阳	李慧3	李慧3	胸椎骨折切开复位内固定术;气管内插管;呼吸机治疗[小于96小时];胸膜切开血肿清除术;连续性肾脏替代治疗[CRRT];引导下中心静脉置管术;腹腔穿刺引流术;开胸探查术;为肾透析的临时静脉插管术
910	D06(ICU)	2024-12-09	2024-12-31	3586848	郑秀花	女	69Y	脑挫伤	创伤性硬膜下出血;创伤性蛛网膜下腔出血;侧脑室出血;头皮血肿;腔隙性脑梗死;肋骨多处骨折;肺挫伤;胸腔积液;肺部感染;颈椎骨折C4;颈椎骨折C3;胸椎骨折T7/T8;胸部脊髓损伤;腰椎压缩性骨折;肺动脉高压中度;高血压性心脏病;2型糖尿病;多处挫伤;低体温;眼球摘除术后状态	好转	龚裕强	陈如杰	周王锋	呼吸机治疗[大于等于96小时];颈内静脉穿刺中心静脉置管术;气管内插管;胸腔穿刺术
911	D07儿童骨科、骨盆外科	2023-12-19	2024-01-01	3465713	陈林弟	女	90Y	股骨粗隆间骨折	骨质疏松;髋关节退行性病变;高血压;肺部感染;心功能不全;肝囊肿;胆囊息肉;后天性肾囊肿;肺诊断性影像异常;肺气肿;胸腔积液;下肢静脉血栓形成	好转	翁益民	翁益民	王特	股骨骨折闭合复位髓内针内固定术
912	D07儿童骨科、骨盆外科	2023-12-21	2024-01-01	3465715	沈宣才	男	65Y	股骨颈骨折	胆囊息肉;前列腺结石;前列腺增生	好转	翁益民	翁益民	王特	股骨骨折闭合复位螺钉内固定术
913	D07儿童骨科、骨盆外科	2023-12-19	2024-01-01	3465717	刘金梯	男	90Y	股骨粗隆间骨折	肺诊断性影像异常;陈旧性肺结核;心功能不全;脂肪肝;后天性肾囊肿;骨折术后;下肢动脉粥样硬化;下肢动脉硬化闭塞症	好转	翁益民	翁益民	王特	股骨骨折闭合复位髓内针内固定术
914	D07儿童骨科、骨盆外科	2023-12-19	2024-01-01	3465718	徐银凤	女	87Y	股骨粗隆间骨折	老年性痴呆;特发性肺纤维化;脂肪肝;胆囊结石;下肢动脉粥样硬化;心功能不全;肺动脉高压;胸椎术后	好转	孔建中	翁益民	王特	股骨骨折闭合复位髓内针内固定术
915	D07儿童骨科、骨盆外科	2023-12-22	2024-01-01	3465729	王阿招	女	94Y	股骨颈骨折	高血压;脑梗死;心功能不全;肺动脉高压;脂肪肝;颈动脉硬化;人工髋关节	好转	翁益民	翁益民	王特	人工股骨头置换术;髋轴面，陶瓷与聚乙烯
916	D07儿童骨科、骨盆外科	2023-12-27	2024-01-01	3465731	林垲奇	男	6Y	取除骨折内固定装置		其他	张敬东	李玉安	朱瑞博	股骨内固定装置去除术
917	D07儿童骨科、骨盆外科	2023-12-27	2024-01-02	3466025	陈鑫靖	男	10Y	肱骨髁上骨折		治愈	张敬东	李玉安	朱瑞博	肱骨骨折闭合复位髓内针内固定术
918	D07儿童骨科、骨盆外科	2023-12-18	2024-01-02	3466027	胡绍做	男	75Y	髋臼骨折	髂骨骨折;耻骨骨折;陈旧性髋臼骨折;肩胛骨多发性骨折;腹腔积血;前列腺钙化灶	治愈	孔建中	陈墨川	胡炜	骨盆骨折切开复位钢板内固定术;关节软骨修复术
919	D07儿童骨科、骨盆外科	2023-12-25	2024-01-02	3466030	李君省	男	66Y	跟腱断裂	开放性双踝骨折;开放性跟骨骨折;开放性距骨骨折;跟腓韧带断裂;肋骨骨折;胸腔积液;胆囊胆固醇沉着症;后天性肾囊肿;肺诊断性影像检查的异常所见	治愈	孔建中	陈墨川	陈墨川	跟腱缝合术;跟骨骨折切开复位螺钉内固定术;皮肤和皮下坏死组织切除清创术;足韧带缝合术;踝融合术
920	D07儿童骨科、骨盆外科	2023-12-24	2024-01-02	3466086	徐小平	男	38Y	胫骨远端骨折伴腓骨骨折	颊和颞下颌区开放性伤口;皮肤挫伤;特发性肺纤维化	治愈	孔建中	陈墨川	陈墨川	胫骨骨折切开复位钢板内固定术;关节软骨修复术;胫骨植骨术
921	D07儿童骨科、骨盆外科	2023-12-20	2024-01-02	3466089	张素叶	女	78Y	股骨颈骨折	高血压;糖尿病;睡眠障碍;脂肪肝;甲状腺术后;下肢静脉血栓形成;心功能不全	治愈	孔建中	胡炜	陈墨川	全髋关节置换;髋轴面，陶瓷与聚乙烯;髋关节滑膜切除术
922	D07儿童骨科、骨盆外科	2023-12-25	2024-01-03	3466610	王存花	女	82Y	股骨粗隆间骨折	心功能不全;下肢动脉粥样硬化;肺间质纤维化;肺囊肿	好转	翁益民	翁益民	王特	股骨骨折闭合复位髓内针内固定术
923	D07儿童骨科、骨盆外科	2023-12-30	2024-01-03	3466741	龚汪东	男	42Y	股骨粗隆下骨折	肺结核;毁损肺;肺大疱;胸膜钙化;胸膜肥厚	治愈	孔建中	陈墨川	陈墨川	股骨骨折闭合复位髓内针内固定术;股骨植骨术
924	D07儿童骨科、骨盆外科	2023-12-27	2024-01-04	3466955	许益阳	男	10Y	尺骨桡骨闭合性骨折		治愈	张敬东	易先宏	朱瑞博	桡骨骨折闭合复位髓内针内固定术;尺骨骨折闭合复位髓内针内固定术
925	D07儿童骨科、骨盆外科	2024-01-02	2024-01-04	3466958	谷昱羲	男	6Y	肱骨髁上骨折		治愈	张敬东	王伟	朱瑞博	肱骨骨折切开复位钢针内固定术
926	D07儿童骨科、骨盆外科	2023-12-29	2024-01-04	3467203	王洪香	女	93Y	股骨粗隆间骨折	支气管扩张伴感染;肺气肿;肺动脉高压;心包积液;肝囊肿;痛风	治愈	孔建中	胡炜	陈墨川	股骨骨折闭合复位螺钉内固定术
927	D07儿童骨科、骨盆外科	2024-01-03	2024-01-05	3467283	夏解童	女	2Y	肱骨髁上骨折		好转	张敬东	王伟	朱瑞博	肱骨骨折闭合复位钢针内固定术
928	D07儿童骨科、骨盆外科	2023-12-26	2024-01-06	3467612	陈紫菲	女	5Y	肱骨外髁骨折		好转	张敬东	毛诚晃	朱瑞博	肱骨骨折切开复位钢针内固定术;关节软骨修复术
929	D07儿童骨科、骨盆外科	2023-12-27	2024-01-06	3467616	徐兰妹	女	88Y	股骨粗隆间骨折	特发性(原发性)高血压;听觉异常，其他特指的;心功能不全;胆囊结石;肺动脉高压;脊柱侧弯	治愈	孔建中	陈墨川	胡炜	股骨骨折闭合复位螺钉内固定术
930	D07儿童骨科、骨盆外科	2024-01-02	2024-01-06	3467621	陈姝妍	女	8Y	肱骨髁上骨折	在肩和上臂水平的其他神经损伤	好转	张敬东	王伟	朱瑞博	肱骨骨折闭合复位钢针内固定术
931	D07儿童骨科、骨盆外科	2024-01-02	2024-01-06	3467623	许舒涵	女	6Y	肱骨髁上骨折		治愈	张敬东	王伟	朱瑞博	肱骨骨折闭合复位钢针内固定术
932	D07儿童骨科、骨盆外科	2024-01-03	2024-01-06	3467676	朱罗春	男	50Y	取除骨折内固定装置	前列腺结石	其他	翁益民	翁益民	王特	踝关节内固定装置去除术
933	D07儿童骨科、骨盆外科	2023-12-30	2024-01-06	3467743	朱文成	男	55Y	股骨颈骨折	乙型病毒性肝炎;肝硬化;心功能不全;肝囊肿;脑术后;肝回声不均;后天性肾囊肿;前列腺结石	治愈	孔建中	陈墨川	胡炜	股骨骨折闭合复位螺钉内固定术
934	D07儿童骨科、骨盆外科	2023-12-18	2024-01-06	3467744	张鹏	男	38Y	两趾切断	胫骨平台骨折;胫腓骨下端骨折;跖骨骨折;趾骨骨折;耻骨骨折;头皮血肿;手术后切口感染;肺诊断性影像异常;脂肪肝	好转	孔建中	陈墨川	胡炜	趾截断术;带蒂皮瓣移植术;皮肤和皮下坏死组织切除清创术;胫骨骨折切开复位钢板内固定术;关节软骨修复术;胫骨植骨术;膝关节半月板成形术;胫骨骨折切开复位钢板内固定术;腓骨骨折切开复位钢板内固定术;胫骨植骨术;皮肤和皮下坏死组织切除清创术
935	D07儿童骨科、骨盆外科	2023-12-24	2024-01-06	3467761	屠德平	男	64Y	胫骨干骨折伴腓骨骨折		治愈	孔建中	陈墨川	陈墨川	胫骨骨折切开复位钢板内固定术
936	D07儿童骨科、骨盆外科	2024-01-03	2024-01-06	3467813	谷梦婕	女	3Y	肱骨外髁骨折	前臂指伸肌损伤;前臂伸肌损伤;在前臂水平的其他肌肉和肌腱的损伤;肘关节积液	好转	张敬东	李玉安	朱瑞博
937	D07儿童骨科、骨盆外科	2023-12-25	2024-01-06	3467827	鲁邦建	男	44Y	股骨干骨折	胫骨平台骨折;距骨骨折;面部损伤;皮肤挫伤	治愈	孔建中	陈墨川	胡炜	股骨骨折闭合复位髓内针内固定术;胫骨骨折切开复位钢板内固定术;关节软骨修复术;距骨骨折切开复位螺钉内固定术;关节软骨修复术
938	D07儿童骨科、骨盆外科	2024-01-01	2024-01-07	3468073	张峻熙	男	4Y	肱骨外髁骨折		治愈	张敬东	李玉安	朱瑞博	肱骨骨折切开复位钢针内固定术;关节软骨修复术
939	D07儿童骨科、骨盆外科	2023-12-31	2024-01-07	3468077	张铸	男	12Y	尺骨桡骨闭合性骨折		治愈	陈华	孙辽军	陈春慧	桡骨骨折切开复位钢板内固定术;尺骨骨折切开复位钢板内固定术
940	D07儿童骨科、骨盆外科	2023-12-01	2024-01-07	3468104	邵经仁	男	50Y	多发性腰椎骨折	胫腓骨闭合性骨折;内踝骨折;髂骨骨折;髋部开放性损伤;创伤后伤口感染;不完全截瘫;坠积性肺炎	治愈	孔建中	陈墨川	胡炜	腰椎骨折切开复位内固定术;椎管减压术;胫骨骨折切开复位钢板内固定术;胫骨植骨术;腓骨骨折闭合复位髓内针内固定术;踝关节骨折切开复位螺钉内固定术;关节软骨修复术;皮肤和皮下坏死组织切除清创术;肌肉或筋膜的其他缝合术;创面封闭式负压引流术（VSD)
941	D07儿童骨科、骨盆外科	2023-12-13	2024-01-07	3468205	陈良平	女	59Y	锁骨骨折	耻骨骨折;三根肋骨骨折不伴第一肋骨骨折;心功能不全;胆囊结石;下肢静脉血栓形成	好转	翁益民	翁益民	王特	锁骨骨折切开复位钢板内固定术
942	D07儿童骨科、骨盆外科	2023-12-29	2024-01-07	3468206	包绵绵	女	75Y	肱骨近端骨折	肩关节脱位;肱二头肌肌腱损伤;高血压	治愈	孔建中	陈墨川	胡炜	人工肱骨头置换术;肩关节成形术;肱二头肌缝合术
943	D07儿童骨科、骨盆外科	2023-12-30	2024-01-07	3468241	吴小云	女	57Y	尺骨鹰嘴骨折	肱骨滑车骨折;肱骨外髁骨折;高血压;乙型病毒性肝炎;中枢性面神经麻痹	治愈	孔建中	陈墨川	胡炜	尺骨骨折切开复位钢针内固定术;肱骨骨折切开复位钢板内固定术;关节软骨修复术
944	D07儿童骨科、骨盆外科	2023-12-30	2024-01-08	3468635	林玉花	女	63Y	胫腓骨下端骨折	距骨骨折;踝关节脱位;腰椎骨折;胸椎退行性病变;腰椎退行性病变;阑尾术后	治愈	孔建中	陈墨川	胡炜	胫骨骨折切开复位钢板内固定术;踝关节骨折切开复位钢板内固定术;关节软骨修复术;腓骨植骨术
945	D07儿童骨科、骨盆外科	2024-01-01	2024-01-08	3468685	潘修美	女	73Y	肱骨近端骨折	肺炎;特发性肺间质纤维化;胸腔积液;主动脉钙化;冠状动脉粥样硬化;心功能不全;颈动脉硬化	治愈	孔建中	陈墨川	胡炜	肱骨骨折切开复位钢板内固定术;肩关节成形术;肱骨植骨术
946	D07儿童骨科、骨盆外科	2023-12-16	2024-01-08	3468696	许大进	男	49Y	开放性跟骨骨折	足软组织感染;手术后切口感染;手术后状态，其他特指的;肺部感染;脑血管瘤;乙型肝炎大三阳;低蛋白血症	治愈	孔建中	陈墨川	胡炜	跟骨骨折切开复位钢板内固定术;关节软骨修复术;跟骨植骨术;皮肤和皮下坏死组织切除清创术;创面封闭式负压引流术（VSD);带蒂皮瓣移植术;皮肤和皮下坏死组织切除清创术;中厚皮片移植术
947	D07儿童骨科、骨盆外科	2024-01-01	2024-01-08	3468791	邓浠锐	男	3Y	肱骨上端骨折		好转	翁益民	翁益民	王特	肱骨骨折切开复位髓内针内固定术
948	D07儿童骨科、骨盆外科	2024-01-06	2024-01-09	3469090	刘淇	男	15Y	胫骨近端骨折伴腓骨骨折	已知病毒的流行性感冒	好转	张敬东	李玉安	朱瑞博
949	D07儿童骨科、骨盆外科	2024-01-07	2024-01-09	3469218	罗宇杰	男	5Y	肱骨髁上骨折		治愈	张敬东	王伟	朱瑞博	肱骨骨折闭合复位钢针内固定术
950	D07儿童骨科、骨盆外科	2024-01-01	2024-01-10	3469597	郑晓敏	女	45Y	跟骨骨折	脂肪肝;肝囊肿;肝钙化灶;肾钙化;肾超声检查异常	治愈	陈华	孙辽军	陈春慧	跟骨骨折切开复位钢板内固定术
951	D07儿童骨科、骨盆外科	2024-01-07	2024-01-10	3469704	金希妍	女	11Y	取除骨折内固定装置		其他	张敬东	李玉安	朱瑞博	胫骨内固定装置去除术;腓骨内固定装置去除术
952	D07儿童骨科、骨盆外科	2024-01-03	2024-01-10	3469707	戴润泽	男	12Y	尺骨鹰嘴骨折	肱骨小头骨折	治愈	张敬东	李玉安	朱瑞博	尺骨骨折切开复位钢针内固定术;肱骨骨折闭合复位钢针内固定术
953	D07儿童骨科、骨盆外科	2023-12-31	2024-01-10	3469713	尤东华	女	57Y	腓骨骨折累及踝关节	内踝骨折;脂肪肝;胆囊息肉	好转	翁益民	翁益民	王特	踝关节骨折切开复位钢板内固定术;腓骨植骨术
954	D07儿童骨科、骨盆外科	2024-01-05	2024-01-10	3469732	罗芷萱	女	2Y	肱骨髁上骨折		好转	张敬东	李玉安	朱瑞博	肱骨骨折切开复位钢针内固定术
955	D07儿童骨科、骨盆外科	2024-01-07	2024-01-10	3469733	周锦龙	男	7Y	取除骨折内固定装置	前臂桡神经损伤	其他	张敬东	李玉安	朱瑞博	尺骨内固定装置去除术
956	D07儿童骨科、骨盆外科	2023-12-31	2024-01-10	3469759	沈皓扬	男	14Y	骨盆骨折	肝大;肝回声不均	好转	翁益民	翁益民	王特	骨盆骨折切开复位钢针内固定术
957	D07儿童骨科、骨盆外科	2024-01-09	2024-01-10	3469993	周亨特	男	27Y	锁骨骨折		未愈	水小龙	郑亦静	郑亦静
958	D07儿童骨科、骨盆外科	2024-01-09	2024-01-11	3470066	徐吴悠	女	1Y	肱骨髁上骨折		好转	张敬东	李玉安	吴宗艺	肱骨骨折切开复位钢针内固定术
959	D07儿童骨科、骨盆外科	2024-01-06	2024-01-11	3470069	陈兰英	女	79Y	股骨粗隆间骨折	高血压;糖尿病;肝囊肿;胆囊结石	治愈	孔建中	陈墨川	胡炜	股骨骨折闭合复位螺钉内固定术
960	D07儿童骨科、骨盆外科	2024-01-05	2024-01-11	3470072	刘乐矿	男	60Y	股骨颈骨折	肝囊肿;前列腺增生	治愈	孔建中	陈墨川	胡炜	股骨骨折闭合复位螺钉内固定术
961	D07儿童骨科、骨盆外科	2024-01-05	2024-01-11	3470074	蒲前喜	男	50Y	锁骨骨折	脂肪肝;前列腺增生	治愈	孔建中	陈墨川	胡炜	锁骨骨折切开复位钢板内固定术
962	D07儿童骨科、骨盆外科	2024-01-01	2024-01-11	3470076	陈银灵	男	45Y	胫骨干骨折伴腓骨骨折	胆囊息肉;肾结石	好转	翁益民	翁益民	王特	胫骨骨折切开复位钢板内固定术
963	D07儿童骨科、骨盆外科	2024-01-08	2024-01-11	3470245	陈颢铭	男	6Y	取除骨折内固定装置		其他	张敬东	李玉安	吴宗艺	股骨内固定装置去除术
964	D07儿童骨科、骨盆外科	2024-01-05	2024-01-11	3470321	周美娇	女	79Y	肱骨近端骨折	脊柱血管瘤;肺诊断性影像异常;颈动脉硬化;颈动脉狭窄;脂肪肝;胸腔积液	治愈	孔建中	陈墨川	胡炜	肱骨骨折切开复位钢板内固定术
965	D07儿童骨科、骨盆外科	2024-01-09	2024-01-12	3470451	谢尚俊	男	10Y	取除骨折内固定装置		其他	张敬东	李玉安	吴宗艺	桡骨内固定装置去除术
966	D07儿童骨科、骨盆外科	2024-01-09	2024-01-12	3470453	陈梓彦	男	3Y	取除骨折内固定装置		其他	张敬东	李玉安	朱瑞博	股骨内固定装置去除术
967	D07儿童骨科、骨盆外科	2024-01-10	2024-01-12	3470477	周嘉仁	男	12Y	肱骨髁上骨折		治愈	张敬东	李玉安	毛诚晃	肱骨骨折闭合复位钢针内固定术
968	D07儿童骨科、骨盆外科	2024-01-11	2024-01-12	3470557	黄楚权	男	2Y	肱骨髁上骨折		好转	张敬东	王伟	吴宗艺	肱骨骨折闭合复位钢针内固定术
969	D07儿童骨科、骨盆外科	2024-01-06	2024-01-13	3470954	潘丕吉	男	49Y	胫腓骨干骨折	脂肪肝;前列腺增生	治愈	孔建中	陈墨川	胡炜	胫骨骨折切开复位钢板内固定术;腓骨骨折闭合复位髓内针内固定术;胫骨植骨术
970	D07儿童骨科、骨盆外科	2024-01-01	2024-01-13	3470958	金凤娥	女	88Y	股骨粗隆间骨折	高血压;膝关节退行性病变;下肢静脉血栓形成;心功能不全;肺诊断性影像异常;脂肪肝;胆囊结石;腘窝囊肿	好转	翁益民	翁益民	王特	股骨骨折闭合复位髓内针内固定术
971	D07儿童骨科、骨盆外科	2024-01-01	2024-01-13	3470960	李家彬	男	46Y	锁骨骨折	手指开放性损伤;指骨骨折;肾结石;肝血管瘤	好转	翁益民	翁益民	王特	锁骨骨折切开复位钢板内固定术
972	D07儿童骨科、骨盆外科	2024-01-05	2024-01-13	3470961	王钢粮	男	59Y	胫骨平台骨折	酒精性肝病;肾错构瘤;前列腺结石	治愈	孔建中	陈墨川	胡炜	胫骨骨折切开复位钢板内固定术;关节软骨修复术;膝关节半月板成形术
973	D07儿童骨科、骨盆外科	2024-01-05	2024-01-13	3470965	陈爱笑	女	47Y	肘关节脱位	尺侧副韧带扭伤;尺骨冠突骨折	好转	张敬东	陈墨川	胡炜	肱骨外固定术;应用单平面外固定架;肘关节脱位手法整复术;石膏绷带固定
974	D07儿童骨科、骨盆外科	2024-01-09	2024-01-13	3470968	李新策	男	12Y	胫腓骨闭合性骨折		好转	张敬东	易先宏	吴宗艺	胫骨骨折闭合复位髓内针内固定术
975	D07儿童骨科、骨盆外科	2024-01-11	2024-01-13	3470969	余威翰	男	9Y	肱骨髁上骨折		好转	张敬东	王伟	吴宗艺	肱骨骨折闭合复位钢针内固定术
976	D07儿童骨科、骨盆外科	2024-01-08	2024-01-13	3470972	林莫译	男	12Y	肱骨外髁骨折		好转	张敬东	李玉安	朱瑞博	肱骨骨折切开复位钢针内固定术;关节软骨修复术
977	D07儿童骨科、骨盆外科	2024-01-06	2024-01-13	3470980	吴歌今	女	61Y	髌骨骨折	脂肪肝;肝囊肿;肾结石	治愈	孔建中	陈墨川	胡炜	髌骨骨折切开复位内固定术;关节软骨修复术;股四头肌缝合术
978	D07儿童骨科、骨盆外科	2024-01-03	2024-01-13	3470987	周世昌	男	85Y	髋臼骨折	脂肪肝;后天性肾囊肿;肾结石;前列腺结石;高血压;糖尿病	治愈	孔建中	陈墨川	胡炜	骨盆骨折切开复位钢板内固定术;关节软骨修复术
979	D07儿童骨科、骨盆外科	2024-01-01	2024-01-14	3471319	金徐博	男	15Y	跟骨骨折	肾结石	好转	翁益民	翁益民	王特	跟骨骨折切开复位钢板内固定术
980	D07儿童骨科、骨盆外科	2024-01-05	2024-01-14	3471367	张士美	男	5Y	股骨干骨折	多处挫伤	好转	张敬东	王伟	朱瑞博	股骨骨折闭合复位髓内针内固定术
981	D07儿童骨科、骨盆外科	2024-01-13	2024-01-14	3471437	徐晨源	男	2Y	肱骨髁上骨折		好转	张敬东	李玉安	吴宗艺	肱骨骨折闭合复位钢针内固定术
982	D07儿童骨科、骨盆外科	2024-01-10	2024-01-14	3471546	张旭东	男	2Y	股骨骨折		好转	张敬东	易先宏	朱瑞博	股骨骨折闭合性复位术不伴内固定;石膏绷带固定
983	D07儿童骨科、骨盆外科	2024-01-10	2024-01-15	3471926	陈予浩	男	7Y	取除骨折内固定装置		其他	张敬东	易先宏	朱瑞博	股骨内固定装置去除术
984	D07儿童骨科、骨盆外科	2024-01-11	2024-01-15	3471963	王铖浩	男	11Y	取除骨折内固定装置		其他	张敬东	易先宏	朱瑞博	股骨内固定装置去除术
985	D07儿童骨科、骨盆外科	2024-01-11	2024-01-15	3471967	叶优优	女	12Y	取除骨折内固定装置		其他	张敬东	李玉安	朱瑞博	股骨内固定装置去除术
986	D07儿童骨科、骨盆外科	2024-01-10	2024-01-15	3471969	陈晴晴	女	7Y	取除骨折内固定装置		其他	张敬东	李玉安	朱瑞博	股骨内固定装置去除术
987	D07儿童骨科、骨盆外科	2024-01-10	2024-01-15	3471973	王思颖	女	3Y	肱骨外髁骨折		好转	张敬东	易先宏	朱瑞博	肱骨骨折切开复位钢针内固定术;关节软骨修复术
988	D07儿童骨科、骨盆外科	2024-01-10	2024-01-15	3471992	俞嘉琪	女	11Y	取除骨折内固定装置		其他	张敬东	易先宏	朱瑞博	跖骨内固定装置去除术
989	D07儿童骨科、骨盆外科	2024-01-11	2024-01-15	3471999	张宇阳	男	2Y	肱骨外髁骨折		好转	张敬东	王伟	朱瑞博	肱骨骨折闭合复位钢针内固定术
990	D07儿童骨科、骨盆外科	2024-01-10	2024-01-15	3472001	章艺馨	女	8Y	取除骨折内固定装置		其他	张敬东	易先宏	朱瑞博	胫骨内固定装置去除术
991	D07儿童骨科、骨盆外科	2024-01-13	2024-01-15	3472023	武浚韬	男	2Y	肱骨髁上骨折		好转	张敬东	王伟	朱瑞博	肱骨骨折闭合复位钢针内固定术
992	D07儿童骨科、骨盆外科	2024-01-10	2024-01-15	3472076	余博瑞	男	5Y	股骨骨折		好转	张敬东	易先宏	朱瑞博	股骨骨折闭合复位髓内针内固定术
993	D07儿童骨科、骨盆外科	2023-11-26	2024-01-15	3472081	宋光军	男	21Y	颈部脊髓损伤	颈椎骨折;手术后切口感染;开放性胫腓骨干骨折;肩关节脱位;肱骨大结节骨折;肩胛骨骨折;耻骨骨折	治愈	孔建中	陈墨川	胡炜	前入路颈椎融合术;椎体次全切除伴椎间盘切除术;2-3个椎骨融合或再融合;金属脊椎融合物置入术;皮肤和皮下坏死组织切除清创术;创面封闭式负压引流术（VSD);皮肤和皮下坏死组织切除清创术;创面封闭式负压引流术（VSD);胫骨骨折切开复位钢板内固定术;游离皮瓣移植术
994	D07儿童骨科、骨盆外科	2024-01-14	2024-01-16	3472488	林紫嫣	女	2Y	肱骨髁上骨折		好转	张敬东	王伟	吴宗艺	肱骨骨折闭合复位钢针内固定术
995	D07儿童骨科、骨盆外科	2024-01-14	2024-01-16	3472491	耿煜捷	女	9Y	肱骨髁上骨折		好转	张敬东	王伟	吴宗艺	肱骨骨折闭合复位钢针内固定术
996	D07儿童骨科、骨盆外科	2024-01-11	2024-01-16	3472638	王祥旭	男	9Y	病理性骨折，不可归类在他处者		好转	张敬东	易先宏	朱瑞博	肱骨骨折切开复位髓内针内固定术;肱骨病损切除术
997	D07儿童骨科、骨盆外科	2024-01-10	2024-01-16	3472641	李贤宇	男	14Y	取除骨折内固定装置		其他	张敬东	易先宏	朱瑞博	胫骨内固定装置去除术
998	D07儿童骨科、骨盆外科	2024-01-07	2024-01-17	3469317	林熙蕊	女	9Y	开放性胫腓骨下端骨折		好转	张敬东	易先宏	朱瑞博	胫骨骨折闭合复位髓内针内固定术;石膏绷带固定
999	D07儿童骨科、骨盆外科	2024-01-12	2024-01-17	3472494	赵幸鹤	男	14Y	肱骨近端骨折	精神发育迟缓，未提及行为缺陷	好转	张敬东	李玉安	朱瑞博
1000	D07儿童骨科、骨盆外科	2024-01-09	2024-01-17	3473146	陈楠	女	47Y	锁骨骨折	高血压;脂肪肝	治愈	孔建中	陈墨川	胡炜	锁骨骨折切开复位钢板内固定术;锁骨植骨术
1001	D07儿童骨科、骨盆外科	2024-01-10	2024-01-17	3473154	钟心蕊	女	6Y	锁骨骨折	面部擦伤;创伤性牙脱位	好转	张敬东	易先宏	朱瑞博	锁骨骨折切开复位钢板内固定术;关节软骨修复术
1002	D07儿童骨科、骨盆外科	2024-01-16	2024-01-17	3473157	杨欣悦	女	1Y	肱骨髁上骨折		好转	张敬东	王伟	朱瑞博	肱骨骨折闭合复位钢针内固定术
1003	D07儿童骨科、骨盆外科	2023-12-31	2024-01-18	3473616	谢春满	女	48Y	胫骨平台伴腓骨骨折	肋骨骨折;子宫平滑肌瘤;盆腔积液;下肢静脉曲张	好转	翁益民	翁益民	王特	胫骨骨折切开复位钢板内固定术
1004	D07儿童骨科、骨盆外科	2024-01-12	2024-01-18	3473755	梁安德	男	3Y	股骨骨折		好转	张敬东	易先宏	朱瑞博	股骨骨折闭合复位髓内针内固定术
1005	D07儿童骨科、骨盆外科	2024-01-12	2024-01-18	3473765	雷浩朗	男	5Y	股骨骨折		好转	张敬东	李玉安	朱瑞博	股骨骨折切开复位钢针内固定术
1006	D07儿童骨科、骨盆外科	2024-01-16	2024-01-18	3473784	林炫	男	7Y	取除骨折内固定装置		其他	张敬东	易先宏	朱瑞博	桡骨内固定装置去除术
1007	D07儿童骨科、骨盆外科	2024-01-09	2024-01-18	3473801	虞洪权	男	83Y	股骨粗隆间骨折	肺气肿合并肺大泡;肺部阴影;肺部感染;胸腔积液;心房颤动;胸椎多处骨折;胸椎退行性病变;颈动脉硬化;下肢静脉血栓形成;下肢静脉曲张;骨折术后;上肢动脉粥样硬化;胆囊结石伴慢性胆囊炎;肝囊肿;后天性肾囊肿	治愈	孔建中	陈墨川	胡炜	股骨骨折闭合复位螺钉内固定术
1008	D07儿童骨科、骨盆外科	2024-01-06	2024-01-18	3473819	黄莲英	女	73Y	踝关节骨折	踝关节脱位;距骨骨折;糖尿病;高血压;下肢动脉粥样硬化;后天性肾囊肿	治愈	孔建中	陈墨川	胡炜	踝关节骨折切开复位钢板内固定术;踝融合术;其他骨移植术
1009	D07儿童骨科、骨盆外科	2024-01-07	2024-01-18	3473864	周查清	女	70Y	肱骨外科颈骨折	肩袖损伤;高血压;脂肪肝;下肢静脉血栓形成	好转	翁益民	翁益民	王特	肱骨骨折切开复位钢板内固定术;肩袖修补术
1010	D07儿童骨科、骨盆外科	2024-01-07	2024-01-18	3473868	李贤林	男	55Y	手术后切口感染	腰椎骨折L3;脂肪肝;胆囊结石;后天性肾囊肿;骨折术后	好转	翁益民	翁益民	王特	皮肤和皮下坏死组织切除清创术
1011	D07儿童骨科、骨盆外科	2024-01-16	2024-01-18	3473875	林欣怡	女	10Y	取除骨折内固定装置		其他	张敬东	李玉安	朱瑞博	桡骨内固定装置去除术;尺骨内固定装置去除术
1012	D07儿童骨科、骨盆外科	2024-01-12	2024-01-18	3473907	徐雨涵	女	4Y	股骨骨折		好转	张敬东	李玉安	朱瑞博	股骨骨折闭合复位髓内针内固定术
1013	D07儿童骨科、骨盆外科	2024-01-15	2024-01-19	3473963	蔡舒悦	女	11Y	取除骨折内固定装置		其他	张敬东	李玉安	朱瑞博	胫骨内固定装置去除术;腓骨内固定装置去除术
1014	D07儿童骨科、骨盆外科	2024-01-15	2024-01-19	3473967	全如萱	女	11Y	取除骨折内固定装置		其他	张敬东	王伟	吴宗艺	腓骨内固定装置去除术
1015	D07儿童骨科、骨盆外科	2024-01-11	2024-01-19	3474021	陈冬妹	女	87Y	股骨粗隆间骨折	耻骨骨折;肺诊断性影像异常;退行性主动脉瓣疾患;主动脉(瓣)关闭不全;心功能不全	治愈	孔建中	陈墨川	胡炜	股骨骨折闭合复位螺钉内固定术
1016	D07儿童骨科、骨盆外科	2024-01-16	2024-01-19	3474066	钟丙濠	男	8Y	取除骨折内固定装置		其他	张敬东	李玉安	吴宗艺	锁骨内固定装置去除术
1017	D07儿童骨科、骨盆外科	2024-01-15	2024-01-19	3474067	叶振皓士	男	14Y	肱骨小头骨折	尺骨冠突骨折	好转	张敬东	李玉安	朱瑞博	肱骨骨折切开复位钢针内固定术;关节软骨修复术
1018	D07儿童骨科、骨盆外科	2024-01-15	2024-01-19	3474070	林可欣	女	6Y	取除骨折内固定装置		其他	张敬东	易先宏	吴宗艺	股骨内固定装置去除术
1019	D07儿童骨科、骨盆外科	2024-01-18	2024-01-20	3474389	杨子祥	男	50Y	胫腓骨闭合性骨折		未愈	翁益民	翁益民	王特
1020	D07儿童骨科、骨盆外科	2024-01-11	2024-01-20	3474565	陈建飞	女	44Y	股骨髁上骨折	胫骨平台骨折;肺诊断性影像异常	治愈	孔建中	陈墨川	胡炜	股骨骨折切开复位钢板内固定术;股骨植骨术
1021	D07儿童骨科、骨盆外科	2024-01-10	2024-01-20	3474566	徐君立	男	24Y	Lisfranc损伤	拇趾骨折	治愈	孔建中	陈墨川	胡炜	足和趾脱位的开放性复位术
1022	D07儿童骨科、骨盆外科	2024-01-17	2024-01-20	3474577	杨磊	男	4Y	肱骨外髁骨折		治愈	张敬东	毛诚晃	吴宗艺	肱骨骨折切开复位钢针内固定术
1023	D07儿童骨科、骨盆外科	2024-01-16	2024-01-20	3474586	叶之玮	男	4Y	孟氏骨折		治愈	张敬东	李玉安	朱瑞博	尺骨骨折切开复位钢针内固定术;桡骨头脱位切开复位术
1024	D07儿童骨科、骨盆外科	2024-01-11	2024-01-20	3474592	郑华听	男	67Y	胫腓骨闭合性骨折	糖尿病;高血压;肾积水伴肾结石;输尿管下段结石;后天性肾囊肿;前列腺增生;前列腺结石	治愈	孔建中	陈墨川	胡炜	胫骨骨折切开复位钢板内固定术
1025	D07儿童骨科、骨盆外科	2024-01-17	2024-01-21	3475148	黄安妮	女	12Y	取除骨折内固定装置		其他	张敬东	易先宏	朱瑞博	踝关节内固定装置去除术
1026	D07儿童骨科、骨盆外科	2024-01-17	2024-01-21	3475192	陈韩瑜	男	9Y	取除骨折内固定装置		其他	张敬东	易先宏	朱瑞博	踝关节内固定装置去除术
1027	D07儿童骨科、骨盆外科	2024-01-11	2024-01-21	3475198	林少连	女	68Y	胫腓骨闭合性骨折	高血压;糖尿病;乙肝后肝硬化;胸腔积液;陈旧性肋骨骨折;特发性肺纤维化;心包积液	治愈	孔建中	陈墨川	胡炜	胫骨骨折切开复位钢板内固定术;腓骨骨折闭合复位髓内针内固定术;胫骨植骨术
1028	D07儿童骨科、骨盆外科	2024-01-17	2024-01-21	3475202	王艺雯	女	12Y	取除骨折内固定装置		其他	张敬东	易先宏	朱瑞博	骨盆内固定装置去除术
1029	D07儿童骨科、骨盆外科	2024-01-17	2024-01-21	3475204	秦以琳	女	12Y	取除骨折内固定装置		其他	张敬东	王伟	朱瑞博	胫骨内固定装置去除术
1030	D07儿童骨科、骨盆外科	2024-01-11	2024-01-21	3475205	刘美绿	女	84Y	股骨颈骨折	高血压;胸腔积液;肺诊断性影像异常;肝囊肿;脂肪肝;后天性肾囊肿	治愈	孔建中	陈墨川	胡炜	人工股骨头置换术;关节滑膜切除术
1031	D07儿童骨科、骨盆外科	2024-01-19	2024-01-21	3475212	施铭哲	男	6Y	取除骨折内固定装置		其他	张敬东	李玉安	朱瑞博	外固定装置取出术
1032	D07儿童骨科、骨盆外科	2024-01-18	2024-01-21	3475219	范奕翔	男	11Y	取除骨折内固定装置		其他	张敬东	易先宏	朱瑞博	桡骨内固定装置去除术
1033	D07儿童骨科、骨盆外科	2024-01-05	2024-01-21	3475224	潘建胜	男	34Y	跟骨骨折	腰椎骨折;跖骨骨折;跖趾关节脱位;脂肪肝;腰椎椎管狭窄	治愈	孔建中	陈墨川	胡炜	跟骨骨折切开复位钢板内固定术;足和趾脱位的开放性复位术;跟骨植骨术;创面封闭式负压引流术（VSD);关节软骨修复术;腰椎骨折切开复位内固定术
1034	D07儿童骨科、骨盆外科	2024-01-19	2024-01-21	3475246	陈冠冰	男	8Y	取除骨折内固定装置		其他	张敬东	易先宏	朱瑞博	桡骨内固定装置去除术
1035	D07儿童骨科、骨盆外科	2024-01-19	2024-01-21	3475261	赵浩辰	男	13Y	取除骨折内固定装置		其他	张敬东	易先宏	朱瑞博	尺骨内固定装置去除术
1036	D07儿童骨科、骨盆外科	2024-01-10	2024-01-21	3475280	张维待	男	31Y	股骨粗隆间骨折	股骨粗隆下骨折;手术后状态，其他特指的;胆汁淤积症;腹腔积液;肋骨骨折;胸腔积液	治愈	孔建中	陈墨川	胡炜	股骨骨折切开复位钢板内固定术;股骨植骨术
1037	D07儿童骨科、骨盆外科	2024-01-06	2024-01-22	3475746	金美丽	女	80Y	股骨下端骨折	骨折术后;心房颤动;高血压;糖尿病;肺部感染;肺诊断性影像异常;心功能不全;胆管结石;下肢动脉粥样硬化;下肢静脉血栓形成	好转	翁益民	翁益民	王特	股骨骨折切开复位钢板内固定术
1038	D07儿童骨科、骨盆外科	2024-01-13	2024-01-22	3475766	潘阿凤	女	86Y	股骨颈骨折	腰椎骨折;人工髋关节;陈旧性肋骨骨折;肺动脉高压	治愈	孔建中	陈墨川	胡炜	人工股骨头置换术;关节滑膜切除术
1039	D07儿童骨科、骨盆外科	2024-01-19	2024-01-22	3475772	林依晨	女	12Y	取除骨折内固定装置		其他	张敬东	易先宏	吴宗艺	尺骨内固定装置去除术
1040	D07儿童骨科、骨盆外科	2024-01-19	2024-01-22	3475775	潘翔	男	14Y	取除骨折内固定装置		其他	张敬东	易先宏	朱瑞博	尺骨内固定装置去除术
1041	D07儿童骨科、骨盆外科	2024-01-17	2024-01-22	3475820	童银水	男	42Y	胫腓骨闭合性骨折	脂肪肝;肾结石;前列腺结石	治愈	孔建中	陈墨川	胡炜	胫骨骨折闭合复位内固定术;腓骨骨折闭合复位髓内针内固定术
1042	D07儿童骨科、骨盆外科	2024-01-13	2024-01-22	3475897	周碎龙	女	69Y	胫腓骨闭合性骨折	下肢动脉粥样硬化	好转	翁益民	翁益民	王特	胫骨骨折切开复位钢板内固定术;腓骨骨折闭合复位髓内针内固定术
1043	D07儿童骨科、骨盆外科	2024-01-18	2024-01-22	3475948	章文杰	男	14Y	肱骨内上髁骨折	在肩和上臂水平神经的损伤	好转	张敬东	易先宏	吴宗艺	肱骨骨折切开复位钢针内固定术
1044	D07儿童骨科、骨盆外科	2024-01-19	2024-01-22	3476252	曾韩杰	男	14Y	取除骨折内固定装置		其他	张敬东	李玉安	朱瑞博	股骨内固定装置去除术;胫骨内固定装置去除术
1045	D07儿童骨科、骨盆外科	2024-01-15	2024-01-23	3476509	胡允洲	男	9Y	取除骨折内固定装置		其他	张敬东	王伟	朱瑞博	股骨内固定装置去除术
1046	D07儿童骨科、骨盆外科	2024-01-21	2024-01-23	3476525	陈思颖	女	9Y	取除骨折内固定装置		其他	张敬东	易先宏	朱瑞博	胫骨内固定装置去除术
1047	D07儿童骨科、骨盆外科	2024-01-21	2024-01-23	3476528	郑洋洋	女	10Y	取除骨折内固定装置		其他	张敬东	王伟	朱瑞博	锁骨内固定装置去除术
1048	D07儿童骨科、骨盆外科	2024-01-18	2024-01-23	3476536	陈泽	男	55Y	股骨粗隆间骨折		好转	翁益民	翁益民	王特	股骨骨折闭合复位髓内针内固定术
1049	D07儿童骨科、骨盆外科	2024-01-21	2024-01-23	3476539	林月华	女	54Y	股骨颈骨折	后天性肾囊肿;肾结石	好转	翁益民	翁益民	王特	股骨骨折闭合复位螺钉内固定术
1050	D07儿童骨科、骨盆外科	2024-01-21	2024-01-23	3476546	陈梓妍	女	7Y	取除骨折内固定装置		其他	张敬东	王伟	朱瑞博	尺骨内固定装置去除术
1051	D07儿童骨科、骨盆外科	2024-01-20	2024-01-23	3476561	黄乐怡	女	5Y	桡骨颈骨折		好转	张敬东	李玉安	朱瑞博	桡骨骨折闭合复位钢针内固定术
1052	D07儿童骨科、骨盆外科	2024-01-20	2024-01-23	3476567	牟书阳	女	7Y	取除骨折内固定装置		其他	张敬东	李玉安	朱瑞博	桡骨内固定装置去除术
1053	D07儿童骨科、骨盆外科	2024-01-21	2024-01-23	3476579	段永杰	男	10Y	取除骨折内固定装置	脂肪肝	其他	张敬东	易先宏	王伟	踝关节内固定装置去除术
1054	D07儿童骨科、骨盆外科	2024-01-21	2024-01-23	3476620	徐振杰	男	14Y	取除骨折内固定装置		其他	张敬东	易先宏	吴宗艺	桡骨内固定装置去除术
1055	D07儿童骨科、骨盆外科	2024-01-11	2024-01-23	3476629	金要周	男	37Y	跟骨骨折	距骨骨折;外踝骨折	治愈	孔建中	陈墨川	胡炜	跟骨骨折切开复位钢板内固定术;关节软骨修复术;创面封闭式负压引流术（VSD)
1056	D07儿童骨科、骨盆外科	2024-01-18	2024-01-23	3476658	刘德航	男	8Y	股骨干骨折		好转	张敬东	李玉安	朱瑞博	股骨骨折闭合复位髓内针内固定术
1057	D07儿童骨科、骨盆外科	2023-12-24	2024-01-23	3476693	徐志宽	男	24Y	胫骨骨折	骰骨骨折;肺气肿;脂肪肝;肺部感染;肺诊断性影像异常	好转	孔建中	陈墨川	胡炜	胫骨骨折闭合复位内固定术;皮肤和皮下坏死组织切除清创术;创面封闭式负压引流术（VSD);皮肤和皮下坏死组织切除清创术
1058	D07儿童骨科、骨盆外科	2024-01-19	2024-01-24	3477002	任永妹	女	88Y	肱骨骨折	糖尿病;高血压;下肢动脉粥样硬化;脂肪肝;胆囊结石;后天性肾囊肿;肺动脉高压;肺诊断性影像异常;下肢动脉狭窄	治愈	孔建中	陈墨川	胡炜	肱骨骨折切开复位钢板内固定术;肩关节成形术;肱骨植骨术
1059	D07儿童骨科、骨盆外科	2024-01-21	2024-01-24	3477086	潘泽燎	男	11Y	取除骨折内固定装置		其他	张敬东	易先宏	毛诚晃	股骨内固定装置去除术
1060	D07儿童骨科、骨盆外科	2024-01-17	2024-01-24	3477151	黄作西	男	45Y	锁骨骨折	肩胛骨骨折;胸椎压缩性骨折;脂肪肝;肾结石	治愈	孔建中	陈墨川	胡炜	锁骨骨折切开复位钢板内固定术;锁骨植骨术
1061	D07儿童骨科、骨盆外科	2024-01-21	2024-01-25	3477330	缪雨猛	男	55Y	锁骨骨折		好转	翁益民	翁益民	王特	锁骨骨折切开复位钢板内固定术
1062	D07儿童骨科、骨盆外科	2024-01-19	2024-01-27	3477601	吴玉香	女	69Y	股骨颈骨折	糖尿病;人工髋关节;心功能不全;脂肪肝;退行性主动脉瓣疾患;二尖瓣及主动脉瓣关闭不全	治愈	孔建中	陈墨川	胡炜	全髋关节置换;髋轴面，陶瓷与聚乙烯;关节滑膜切除术
1063	D07儿童骨科、骨盆外科	2024-01-18	2024-01-28	3477672	项廷飞	男	40Y	跟骨骨折	外踝骨折;桡骨远端骨折;脂肪肝	治愈	孔建中	胡炜	陈墨川	跟骨骨折切开复位钢板内固定术;关节软骨修复术;跟骨植骨术;创面封闭式负压引流术（VSD)
1064	D07儿童骨科、骨盆外科	2024-01-17	2024-01-28	3477677	林春香	女	59Y	跟骨骨折	距骨骨折;糖尿病	治愈	孔建中	陈墨川	胡炜	跟骨骨折切开复位钢板内固定术;关节软骨修复术;跟骨植骨术;创面封闭式负压引流术（VSD)
1065	D07儿童骨科、骨盆外科	2024-01-18	2024-01-28	3477707	陈怀星	男	63Y	跟骨骨折	高血压;痛风;脾大;肾结石;后天性肾囊肿;前列腺结石;上呼吸道感染;血小板减少	治愈	孔建中	胡炜	陈墨川	跟骨骨折切开复位钢板内固定术;关节软骨修复术;创面封闭式负压引流术（VSD)
1066	D07儿童骨科、骨盆外科	2024-01-25	2024-01-29	3477801	杜杰浩	男	3Y	肱骨远端骨折		治愈	张敬东	王伟	毛诚晃	肱骨骨折切开复位钢针内固定术;关节软骨修复术
1067	D07儿童骨科、骨盆外科	2024-01-24	2024-01-30	3477920	雷小梦	女	6Y	胫腓骨闭合性骨折		治愈	张敬东	李玉安	朱瑞博	胫骨骨折闭合复位髓内针内固定术
1068	D07儿童骨科、骨盆外科	2024-01-24	2024-01-30	3477922	潘云云	女	73Y	骶骨骨折	耻骨骨折;脂肪肝;后天性肾囊肿;肾结石;高血压;糖尿病;人工髋关节;肾术后	好转	翁益民	翁益民	王特
1069	D07儿童骨科、骨盆外科	2024-01-29	2024-01-30	3477949	郑恩典	男	2Y	肱骨外髁骨折		未愈	张敬东	王伟	朱瑞博
1070	D07儿童骨科、骨盆外科	2024-01-18	2024-01-30	3477957	陈锂锰	男	23Y	Lisfranc损伤	跖骨骨折;脂肪肝;肾结石;前列腺囊肿	好转	翁益民	翁益民	王特	跖跗关节脱位切开复位术;跖骨骨折闭合复位内固定术
1071	D07儿童骨科、骨盆外科	2024-01-20	2024-01-30	3477958	董笑嫣	女	27Y	髌骨骨折	脂肪肝	好转	翁益民	翁益民	王特	髌骨骨折切开复位张力带钢丝内固定术
1072	D07儿童骨科、骨盆外科	2024-01-25	2024-01-30	3477959	朱再铄	男	7Y	尺骨远端骨折伴桡骨远端骨折		好转	张敬东	易先宏	朱瑞博	桡骨骨折闭合复位钢针内固定术
1073	D07儿童骨科、骨盆外科	2024-01-17	2024-01-30	3477978	赵子龙	男	43Y	胫骨平台骨折	胫骨干骨折;脂肪肝;前列腺结石;贫血	治愈	孔建中	胡炜	陈墨川	胫骨骨折切开复位钢板内固定术;关节软骨修复术;胫骨植骨术
1074	D07儿童骨科、骨盆外科	2024-01-29	2024-01-30	3478010	柯竹翠	女	54Y	股骨骨折	糖尿病	好转	孔建中	胡炜	陈墨川
1075	D07儿童骨科、骨盆外科	2024-01-10	2024-02-01	3478270	沈煜	男	14Y	肱骨近端骨折	失血性休克;肩胛骨骨折;多处开放性伤口;肱骨内上髁骨折;肺挫伤;楔状骨骨折(足);足舟骨骨折;头部的开放性伤口;创伤性气胸	治愈	孔建中	胡炜	陈墨川	肱骨骨折切开复位钢板内固定术;肩胛骨骨折切开复位钢针内固定术;肩关节成形术;肱骨植骨术;肱骨骨折切开复位髓内针内固定术
1076	D07儿童骨科、骨盆外科	2024-01-07	2024-02-01	3478276	王永竹	女	74Y	股骨转子间骨折	脑出血后遗症;高血压;2型糖尿病;肾病;后天性肾囊肿;肋骨多处骨折;完全性右束支传导阻滞	好转	孔建中	胡炜	陈墨川	股骨骨折切开复位钢板内固定术;股骨植骨术
1077	D07儿童骨科、骨盆外科	2024-01-25	2024-02-02	3478392	吴媛瑾	女	9Y	开放性胫腓骨干骨折		治愈	张敬东	易先宏	王伟	胫骨骨折闭合复位内固定术;创面封闭式负压引流术（VSD);石膏绷带固定;皮肤和皮下坏死组织切除清创术
1078	D07儿童骨科、骨盆外科	2024-01-27	2024-02-03	3478597	王松妹	女	86Y	股骨粗隆间骨折	高血压;肝囊肿;多发性脑梗死;老年性脑萎缩;后天性颅骨缺损;后天性肾囊肿;低蛋白血症;贫血;低钾血症	治愈	孔建中	胡炜	陈墨川	股骨骨折闭合复位螺钉内固定术
1079	D07儿童骨科、骨盆外科	2024-01-24	2024-02-03	3478598	郑听养	男	66Y	股骨粗隆间骨折	掌骨骨折;高血压;肾盂积水，其他的;肋骨多处骨折;低蛋白血症;贫血	治愈	孔建中	胡炜	陈墨川	掌骨骨折闭合复位钢针内固定术;股骨骨折闭合复位螺钉内固定术
1080	D07儿童骨科、骨盆外科	2024-01-23	2024-02-03	3478599	吕玉叶	女	82Y	股骨粗隆间骨折	高血压;糖尿病	治愈	孔建中	胡炜	陈墨川	股骨骨折闭合复位螺钉内固定术
1081	D07儿童骨科、骨盆外科	2024-02-02	2024-02-03	3478640	张林鑫	男	6Y	尺骨桡骨闭合性骨折	肺挫伤	好转	张敬东	李玉安	朱瑞博
1082	D07儿童骨科、骨盆外科	2024-01-30	2024-02-03	3478672	谢树准	男	42Y	股骨颈骨折	先天性肌无力;受压区压疮;胆囊息肉	好转	翁益民	翁益民	王特
1083	D07儿童骨科、骨盆外科	2023-12-06	2024-02-03	3478691	夏肇苏	男	31Y	创伤性空肠破裂	肠系膜裂伤;腹腔积血;胰头损伤;失血性休克;髋臼骨折;腰椎骨折;骶骨骨折;髂骨骨折;耻骨骨折;股骨粗隆间骨折;股骨干骨折;大腿开放性伤口;小腿开放性伤口;创伤性肛门裂伤;肺不张;低蛋白血症;贫血;腹腔积液;胸腔积液;肠胀气;肛瘘	治愈	孔建中	胡炜	陈墨川	结肠造口术;小肠部分切除术;皮肤和皮下坏死组织切除清创术;肌腱、血管、神经探查术;皮肤和皮下坏死组织切除清创术;股骨外固定装置去除术;股骨外固定术;股骨骨折闭合复位螺钉内固定术;创面封闭式负压引流术（VSD);带蒂皮瓣移植术;创面封闭式负压引流术（VSD)
1084	D07儿童骨科、骨盆外科	2024-01-08	2024-02-04	3478737	连雪英	女	51Y	骨盆骨折	骶髂关节脱位;多发性腰椎骨折;骶骨骨折;马尾损伤;肱骨骨折;肋骨骨折;低蛋白血症;低钾血症;贫血;创伤性湿肺;胸腔积液;腹腔积液;腹腔积血;肝囊肿;胆囊息肉;后天性肾囊肿;创伤性肾血肿;下肢静脉血栓形成	治愈	孔建中	胡炜	陈墨川	经导管髂内动脉栓塞术;髂动脉造影;骨盆骨折切开复位钢板内固定术;脊椎骨折切开复位内固定术;椎管减压术;肱骨骨折切开复位髓内针内固定术
1085	D07儿童骨科、骨盆外科	2024-01-24	2024-02-04	3478763	蒋洪翠	女	84Y	股骨粗隆间骨折	老年性骨质疏松;老年性痴呆;肺部感染;心功能不全;低蛋白血症;中度贫血;脊椎退行性病变	好转	翁益民	翁益民	王特	股骨骨折闭合复位髓内针内固定术
1086	D07儿童骨科、骨盆外科	2024-02-02	2024-02-05	3478861	江曼琦	女	1Y	股骨粗隆下骨折	创伤性硬膜下出血;头皮血肿	好转	张敬东	李玉安	毛诚晃
1087	D07儿童骨科、骨盆外科	2024-02-01	2024-02-05	3478862	施允歆	女	5Y	肱骨髁上骨折		治愈	张敬东	易先宏	毛诚晃	肱骨骨折闭合复位钢针内固定术
1088	D07儿童骨科、骨盆外科	2024-01-27	2024-02-05	3478869	南炫锋	男	7Y	尺骨鹰嘴骨折	创伤性硬脑膜外出血;额骨骨折;颞骨骨折;蝶骨骨折;头皮血肿;皮肤挫伤;上颌窦蝶窦炎;肺挫伤	治愈	张敬东	易先宏	朱瑞博	尺骨骨折切开复位钢针内固定术;关节软骨修复术
1089	D07儿童骨科、骨盆外科	2024-01-24	2024-02-09	3477664	叶飞华	男	59Y	髌骨骨折	趾骨骨折;特发性(原发性)高血压;腔隙性脑梗死	好转	翁益民	翁益民	王特	髌骨骨折切开复位张力带钢丝内固定术
1090	D07儿童骨科、骨盆外科	2024-01-11	2024-02-10	3479390	赵红英	女	71Y	胫骨平台伴腓骨骨折	胫骨干骨折;胸腔积液;肝脂肪瘤;肝钙化灶;下肢静脉血栓形成;后天性肾囊肿;贫血;低蛋白血症	治愈	孔建中	胡炜	陈墨川	胫骨骨折切开复位钢板内固定术;关节软骨修复术;胫骨植骨术
1091	D07儿童骨科、骨盆外科	2024-01-29	2024-02-11	3479421	金宗妹	女	87Y	肱骨近端骨折	多发性脑梗死;脱髓鞘性脑病;老年性脑萎缩;颈内动脉粥样硬化;椎动脉硬化;肺诊断性影像异常;心功能不全;肾结石	治愈	孔建中	陈墨川	胡炜	肱骨骨折切开复位钢板内固定术;肩关节成形术;肱骨植骨术
1092	D07儿童骨科、骨盆外科	2024-01-30	2024-02-11	3479425	张素华	女	55Y	肱骨近端骨折	胫骨平台伴腓骨骨折;膝内侧半月板损伤;膝的其他和未特指部位的扭伤和劳损;腘窝囊肿;骨软骨炎;高血压;糖尿病不伴有并发症;糖尿病性视网膜病变	好转	翁益民	翁益民	王特	肱骨骨折切开复位钢板内固定术;肱骨植骨术;石膏绷带固定
1093	D07儿童骨科、骨盆外科	2024-01-17	2024-02-11	3479464	林知亮	男	42Y	髂骨骨折	耻骨骨折;坐骨骨折;股骨颈骨折;桡骨头骨折;面部软组织挫伤;创伤性牙齿脱落	好转	翁益民	翁益民	王特	股骨骨折闭合复位螺钉内固定术;骨盆骨折切开复位钢板内固定术
1094	D07儿童骨科、骨盆外科	2024-01-13	2024-02-13	3479635	张程	男	10Y	跟骨骨折	脑挫伤;创伤性硬脑膜外出血;头皮血肿;颅骨骨折;胫腓骨下端骨折;桡骨下端骨折;普拉德-威利综合征;蛛网膜囊肿	好转	张敬东	李玉安	朱瑞博	跟骨骨折切开复位钢板内固定术;胫骨骨折切开复位钢针内固定术;桡骨骨折切开复位钢针内固定术
1095	D07儿童骨科、骨盆外科	2024-02-12	2024-02-13	3479644	郑攸宁	男	2Y	肱骨髁上骨折		未愈	张敬东	李玉安	吴宗艺
1096	D07儿童骨科、骨盆外科	2024-02-10	2024-02-16	3479846	王弟	女	64Y	骶骨骨折	耻骨骨折;多发性腰椎骨折;腹腔积血;后天性肾囊肿;肾错构瘤	好转	孔建中	陈墨川	胡炜
1097	D07儿童骨科、骨盆外科	2024-01-06	2024-02-18	3480005	孙子玲	男	58Y	股骨粗隆间骨折	股骨颈骨折;尺骨远端骨折伴桡骨远端骨折;第二颈椎骨折;颈椎半脱位C2/C3;眶骨骨折;眼眶挫伤;肋骨多发性骨折伴第一肋骨骨折;创伤性湿肺;创伤性胸腔积液;肺挫伤;创伤性气胸;肝囊肿;腔隙性脑梗死	好转	翁益民	翁益民	王特	股骨骨折闭合复位髓内针内固定术;桡骨骨折闭合性复位术;桡骨外固定术
1098	D07儿童骨科、骨盆外科	2024-01-21	2024-02-18	3480007	董录	女	55Y	股骨粗隆间骨折	脂肪肝;肺结核	好转	翁益民	翁益民	王特	股骨骨折闭合复位髓内针内固定术
1099	D07儿童骨科、骨盆外科	2024-01-30	2024-02-18	3480073	周冬蕊	女	69Y	股骨颈骨折	后天性肾囊肿	好转	翁益民	翁益民	王特	人工股骨头置换术
1100	D07儿童骨科、骨盆外科	2024-02-11	2024-02-19	3480117	梁盛航	男	7Y	肱骨髁上骨折		治愈	张敬东	李玉安	毛诚晃	肱骨骨折闭合复位钢针内固定术
1101	D07儿童骨科、骨盆外科	2024-02-16	2024-02-19	3480158	郑攸宁	男	2Y	肱骨髁上骨折		治愈	张敬东	易先宏	吴宗艺	肱骨骨折闭合复位钢针内固定术
1102	D07儿童骨科、骨盆外科	2024-02-11	2024-02-20	3480204	吴沙窈	女	4Y	肱骨外髁骨折		治愈	张敬东	李玉安	王伟	肱骨骨折切开复位钢针内固定术
1103	D07儿童骨科、骨盆外科	2024-01-06	2024-02-20	3480216	严金根	男	38Y	股骨干骨折	肱骨髁上骨折;尺骨桡骨闭合性骨折;髌骨骨折;前臂桡神经损伤;脂肪肝;肺诊断性影像异常	好转	翁益民	翁益民	王特	股骨骨折闭合复位髓内针内固定术;髌骨骨折切开复位张力带钢丝内固定术;肱骨骨折切开复位钢板内固定术;桡骨骨折切开复位钢板内固定术;尺骨骨折闭合复位髓内针内固定术
1104	D07儿童骨科、骨盆外科	2024-02-10	2024-02-22	3480444	张岩标	男	51Y	胫骨远端骨折伴腓骨骨折	脂肪肝;前列腺增生;前列腺结石	治愈	孔建中	陈墨川	胡炜	胫骨骨折切开复位钢板内固定术
1105	D07儿童骨科、骨盆外科	2024-02-13	2024-02-22	3480447	朱嘉锐	男	4Y	肱骨外髁骨折		治愈	张敬东	李玉安	毛诚晃	肱骨骨折切开复位钢针内固定术;关节软骨修复术
1106	D07儿童骨科、骨盆外科	2024-02-10	2024-02-22	3480449	周柳花	女	63Y	踝关节骨折	肾错构瘤;颈动脉硬化;脂肪肝;肾超声检查异常;后天性肾囊肿	好转	孔建中	陈墨川	胡炜	踝关节骨折切开复位钢板内固定术;关节软骨修复术;踝融合术
1107	D07儿童骨科、骨盆外科	2024-02-16	2024-02-25	3480718	颜贻蔡	男	73Y	胫骨平台骨折	高血压;下肢深静脉血栓形成;艾滋病	治愈	孔建中	陈墨川	胡炜	胫骨骨折切开复位钢板内固定术;关节软骨修复术;同种异体骨植骨术
1108	D07儿童骨科、骨盆外科	2024-02-22	2024-02-26	3480826	章众香	女	75Y	肱骨大结节骨折	肩关节脱位;跖骨骨折;高血压;糖尿病;骨质增生	好转	翁益民	翁益民	王特
1109	D07儿童骨科、骨盆外科	2024-02-17	2024-02-27	3480988	周美花	女	93Y	股骨粗隆间骨折	高血压;肝囊肿;胆囊结石;后天性肾囊肿;下肢深静脉血栓形成;低蛋白血症	治愈	孔建中	胡炜	陈墨川	股骨骨折闭合复位螺钉内固定术
1110	D07儿童骨科、骨盆外科	2024-02-24	2024-02-28	3481104	王锐	男	8Y	桡尺骨骨干骨折		治愈	张敬东	易先宏	朱瑞博	尺骨骨折闭合复位髓内针内固定术;桡骨骨折闭合复位髓内针内固定术
1111	D07儿童骨科、骨盆外科	2024-02-18	2024-02-28	3481115	王天云	女	42Y	桡骨头骨折	创伤性胸腔积液	治愈	孔建中	胡炜	陈墨川	桡骨骨折切开复位钢针内固定术;关节软骨修复术
1112	D07儿童骨科、骨盆外科	2024-02-17	2024-02-28	3481117	瞿飞尽	女	58Y	髌骨骨折	膝关节退行性病变;高血压	治愈	孔建中	胡炜	陈墨川	髌骨骨折切开复位张力带钢丝内固定术;关节软骨修复术;股四头肌缝合术
1113	D07儿童骨科、骨盆外科	2024-02-16	2024-02-28	3481125	王泽华	男	49Y	开放性胫腓骨下端骨折	脂肪肝	治愈	孔建中	胡炜	陈墨川	胫骨骨折切开复位钢板内固定术;腓骨骨折闭合复位髓内针内固定术;胫骨植骨术;皮肤和皮下坏死组织切除清创术
1114	D07儿童骨科、骨盆外科	2024-02-20	2024-02-29	3481261	吴连千	女	67Y	髌骨骨折	脂肪肝;肝囊肿;肺诊断性影像异常	治愈	孔建中	胡炜	陈墨川	髌骨骨折切开复位张力带钢丝内固定术;关节软骨修复术;股四头肌缝合术
1115	D07儿童骨科、骨盆外科	2024-02-22	2024-02-29	3481263	林秀英	女	58Y	尺骨远端骨折伴桡骨远端骨折	下尺桡关节脱位;阑尾术后;肾结石	治愈	孔建中	胡炜	陈墨川	尺骨骨折切开复位钢板内固定术;桡骨骨折闭合复位钢针内固定术;关节软骨修复术;丙烯酸水泥骨空隙填充
1116	D07儿童骨科、骨盆外科	2024-02-18	2024-02-29	3481285	陈圣通	男	81Y	股骨颈骨折	胆囊结石;后天性肾囊肿	治愈	孔建中	胡炜	陈墨川	全髋关节置换;髋轴面，陶瓷与聚乙烯;关节滑膜切除术
1117	D07儿童骨科、骨盆外科	2024-01-11	2024-03-02	3481454	夏绍文	男	5Y	创伤后伤口感染	胫腓骨闭合性骨折	治愈	张敬东	李玉安	吴宗艺	创面封闭式负压引流术（VSD);皮肤和皮下坏死组织切除清创术;创面封闭式负压引流术（VSD);皮肤和皮下坏死组织切除清创术;游离皮瓣移植术;皮肤和皮下坏死组织切除清创术;创面封闭式负压引流术（VSD)
1118	D07儿童骨科、骨盆外科	2024-02-26	2024-03-02	3481481	李紫萱	女	6Y	桡骨颈骨折		治愈	张敬东	李玉安	吴宗艺	桡骨骨折切开复位钢针内固定术
1119	D07儿童骨科、骨盆外科	2024-02-15	2024-03-02	3481515	黄贤法	男	51Y	股骨粗隆间骨折	肺部感染;乙肝后肝硬化;门静脉高压;前列腺结石;肾结石	好转	孔建中	胡炜	陈墨川	股骨骨折闭合复位螺钉内固定术;股骨植骨术
1120	D07儿童骨科、骨盆外科	2024-02-20	2024-03-02	3481526	余江毅	男	24Y	掌骨多处骨折		好转	翁益民	翁益民	王特	掌骨骨折切开复位钢板内固定术
1121	D07儿童骨科、骨盆外科	2024-02-18	2024-03-02	3481529	章爱芳	女	82Y	股骨颈骨折	高血压;手术后状态，其他特指的;后天性肾囊肿;人工膝关节;脂肪肝;下肢动脉粥样硬化;下肢静脉血栓形成;肾后天性缺失;肺诊断性影像异常	好转	胡炜	胡炜	陈墨川	人工股骨头置换术;髋关节滑膜切除术
1122	D07儿童骨科、骨盆外科	2024-02-23	2024-03-03	3481686	洪瑞宗	男	86Y	股骨粗隆间骨折	肺部感染;心房颤动;肝硬化;肝术后;前列腺增生;前列腺结石	好转	孔建中	胡炜	陈墨川	股骨骨折切开复位螺钉内固定术;股骨植骨术
1123	D07儿童骨科、骨盆外科	2024-02-22	2024-03-03	3481691	潘志楷	男	13Y	胫骨结节骨折		治愈	张敬东	李玉安	朱瑞博	胫骨骨折切开复位螺钉内固定术;关节软骨修复术
1124	D07儿童骨科、骨盆外科	2024-02-23	2024-03-04	3481905	林颜毅	男	46Y	开放性三踝骨折	踝关节脱位;脂肪肝;胫腓韧带远端撕裂;胫腓骨闭合性骨折	好转	孔建中	胡炜	陈墨川	踝关节骨折切开复位钢针内固定术;踝融合术;关节软骨修复术;皮肤和皮下坏死组织切除清创术;腓骨骨折切开复位钢板内固定术;胫骨骨折切开复位钢针内固定术
1125	D07儿童骨科、骨盆外科	2024-02-24	2024-03-05	3482046	陈碎眉	女	82Y	股骨粗隆间骨折	心功能不全;下肢静脉血栓形成;高血压	好转	翁益民	翁益民	王特	股骨骨折闭合复位髓内针内固定术
1126	D07儿童骨科、骨盆外科	2024-02-22	2024-03-05	3482048	毛爱林	女	90Y	股骨颈骨折	后天性肾囊肿;肝占位性病变;下肢静脉曲张	好转	孔建中	胡炜	陈墨川	人工股骨头置换术;关节滑膜切除术
1127	D07儿童骨科、骨盆外科	2024-02-20	2024-03-05	3482049	滕顺兰	女	63Y	股骨髁骨折	心功能不全;脂肪肝;胆囊结石	好转	翁益民	翁益民	王特	股骨骨折切开复位钢板内固定术
1128	D07儿童骨科、骨盆外科	2024-02-28	2024-03-06	3482213	陈康平	男	5Y	桡骨颈骨折	尺骨近端骨折	治愈	张敬东	李玉安	朱瑞博	桡骨骨折切开复位钢针内固定术;关节软骨修复术
1129	D07儿童骨科、骨盆外科	2024-02-28	2024-03-06	3482231	蔡恩桐	女	2Y	肱骨外髁骨折		治愈	张敬东	李玉安	毛诚晃	肱骨骨折切开复位钢针内固定术;关节软骨修复术
1130	D07儿童骨科、骨盆外科	2024-02-23	2024-03-06	3482237	林美凤	女	79Y	开放性胫骨上端骨折	手术后状态，其他特指的;Ⅱ度二型房室传导阻滞;肺诊断性影像异常	好转	孔建中	胡炜	陈墨川	胫骨骨折切开复位钢板内固定术;皮肤和皮下坏死组织切除清创术;胫骨植骨术
1131	D07儿童骨科、骨盆外科	2024-03-03	2024-03-06	3482239	李娅楠	女	6Y	肱骨外髁骨折		好转	张敬东	李玉安	朱瑞博
1132	D07儿童骨科、骨盆外科	2024-03-01	2024-03-07	3482395	高成	男	14Y	桡骨颈骨折		治愈	张敬东	李玉安	吴宗艺	桡骨骨折闭合复位髓内针内固定术
1133	D07儿童骨科、骨盆外科	2024-03-05	2024-03-09	3482631	李沐阳	男	15Y	取除骨折内固定装置		其他	张敬东	闫广奎	吴宗艺	尺骨内固定装置去除术;桡骨内固定装置去除术
1134	D07儿童骨科、骨盆外科	2024-03-05	2024-03-09	3482643	易啸霖	男	1Y	肱骨髁上骨折		治愈	张敬东	闫广奎	吴宗艺	肱骨骨折闭合复位钢针内固定术
1135	D07儿童骨科、骨盆外科	2024-02-27	2024-03-09	3482755	陈瑞福	男	67Y	开放性胫骨上端骨折	创伤后伤口感染;颈动脉硬化;后天性肾囊肿;窦性心动过速;不完全性右束支传导阻滞;取除骨折内固定装置	好转	孔建中	胡炜	陈墨川	皮肤和皮下坏死组织切除清创术;腓神经缝合术;创面封闭式负压引流术（VSD);跟骨牵引术;胫前肌缝合术;皮肤和皮下坏死组织切除清创术;创面封闭式负压引流术（VSD);胫骨骨折切开复位钢板内固定术;胫骨内固定装置去除术;关节软骨修复术;胫骨植骨术
1136	D07儿童骨科、骨盆外科	2024-02-27	2024-03-09	3482769	陈兰香	女	90Y	股骨粗隆间骨折	肋骨多处骨折;心功能不全;下肢静脉血栓形成;胆囊息肉;后天性肾囊肿;肝回声不均;高血压	好转	翁益民	翁益民	王特	股骨骨折闭合复位髓内针内固定术
1137	D07儿童骨科、骨盆外科	2024-03-09	2024-03-10	3482954	高献敏	男	44Y	跟骨骨折	肺诊断性影像异常;肺钙化	未愈	孔建中	胡炜	陈墨川
1138	D07儿童骨科、骨盆外科	2024-02-27	2024-03-10	3482957	金学熙	男	60Y	髋臼骨折	髋关节脱位;髌骨骨折;开放性特指趾骨骨折;趾关节脱位;趾伸肌腱断裂;指骨骨折;头部的损伤;高血压;窦性心动过缓;颈动脉硬化	治愈	孔建中	胡炜	陈墨川	骨盆骨折切开复位钢板内固定术;髌骨骨折切开复位张力带钢丝内固定术;关节软骨修复术;髌骨植骨术;股四头肌缝合术;趾骨骨折切开复位钢针内固定术;趾关节脱位切开复位术;趾肌腱缝合术;骨盆植骨术;髋关节脱位手法整复术
1139	D07儿童骨科、骨盆外科	2024-02-16	2024-03-10	3482959	夏洪玉	女	75Y	肱骨髁间骨折	尺骨茎突骨折伴桡骨远端骨折;肱骨近端骨折;高血压;肾结石;肋骨多处骨折;肺诊断性影像异常;糖尿病;下肢静脉血栓形成;肌肉骨骼系统其他部位诊断性影像检查的异常所见	治愈	孔建中	胡炜	陈墨川	肱骨骨折切开复位钢板内固定术;关节软骨修复术;肱骨植骨术;桡骨骨折闭合复位螺钉内固定术;人工肱骨头置换术;肩关节成形术;肱骨植骨术
1140	D07儿童骨科、骨盆外科	2024-02-25	2024-03-10	3482979	王凤霞	女	56Y	股骨颈骨折	胆囊息肉;肾结石	治愈	孔建中	胡炜	陈墨川	全髋关节置换;关节滑膜切除术;髋轴面，陶瓷与聚乙烯
1141	D07儿童骨科、骨盆外科	2024-03-04	2024-03-10	3482998	朱银兰	女	83Y	股骨粗隆间骨折	肺部感染;肺大疱;高血压;胆囊结石;心房过早除极;完全性右束支传导阻滞;陈旧性前壁心肌梗死;糖尿病不伴有并发症;心室肥大	治愈	孔建中	胡炜	陈墨川	股骨骨折闭合复位螺钉内固定术
1142	D07儿童骨科、骨盆外科	2024-02-29	2024-03-10	3483036	叶林娟	女	49Y	髌骨骨折	乙型病毒性肝炎病原携带者;胆囊结石;多发性肝囊肿	治愈	孔建中	胡炜	陈墨川	髌骨骨折切开复位张力带钢丝内固定术;关节软骨修复术;股四头肌缝合术;下肢关节囊缝合术
1143	D07儿童骨科、骨盆外科	2024-02-29	2024-03-12	3483362	徐顺星	男	81Y	肱骨近端骨折		好转	翁益民	翁益民	王特	肱骨骨折切开复位钢板内固定术;肩袖修补术
1144	D07儿童骨科、骨盆外科	2024-03-05	2024-03-12	3483363	林玉花	女	63Y	股骨颈骨折	颈动脉硬化	治愈	孔建中	胡炜	陈墨川	股骨骨折闭合复位螺钉内固定术
1145	D07儿童骨科、骨盆外科	2024-03-05	2024-03-12	3483364	高雪雪	女	57Y	股骨颈骨折	肾结石	治愈	孔建中	胡炜	陈墨川	全髋关节置换;关节滑膜切除术;髋轴面，金属与聚乙烯
1146	D07儿童骨科、骨盆外科	2024-03-09	2024-03-12	3483375	陈怡焱	男	15Y	取除骨折内固定装置		其他	张敬东	闫广奎	吴宗艺	胫骨内固定装置去除术
1147	D07儿童骨科、骨盆外科	2024-03-09	2024-03-12	3483376	李嘉豪	男	12Y	取除骨折内固定装置		其他	张敬东	李玉安	吴宗艺	尺骨内固定装置去除术
1148	D07儿童骨科、骨盆外科	2024-03-05	2024-03-12	3483378	何亦喆	男	7Y	肱骨髁上骨折		治愈	张敬东	闫广奎	吴宗艺	肱骨骨折闭合复位钢针内固定术
1149	D07儿童骨科、骨盆外科	2024-02-28	2024-03-12	3483396	高国强	男	49Y	胫腓骨闭合性骨折	高血压;糖尿病	好转	翁益民	翁益民	王特	胫骨骨折切开复位钢板内固定术;腓骨骨折切开复位钢板内固定术;胫骨植骨术
1150	D07儿童骨科、骨盆外科	2024-02-22	2024-03-13	3483618	孙斌斌	男	25Y	胫骨干骨折伴腓骨骨折	跗跖关节脱位;双踝骨折;跖骨骨折;脂肪肝	治愈	孔建中	胡炜	陈墨川	胫骨骨折切开复位钢板内固定术;踝关节骨折切开复位钢板内固定术;关节软骨修复术;踝融合术;跖跗关节脱位切开复位术;跖骨骨折切开复位钢板内固定术;关节软骨修复术
1151	D07儿童骨科、骨盆外科	2024-03-07	2024-03-14	3483859	杨良通	男	69Y	股骨粗隆间骨折	股骨粗隆下骨折;胆囊结石;Ⅰ度房室传导阻滞;糖尿病;高血压;下肢静脉曲张	治愈	孔建中	胡炜	陈墨川	股骨骨折切开复位螺钉内固定术;股骨植骨术
1152	D07儿童骨科、骨盆外科	2024-03-12	2024-03-14	3483921	陈思维	男	12Y	取除骨折内固定装置		其他	张敬东	李玉安	吴宗艺	桡骨内固定装置去除术
1153	D07儿童骨科、骨盆外科	2024-03-11	2024-03-14	3483922	郑恩典	男	2Y	取除骨折内固定装置		其他	张敬东	闫广奎	吴宗艺	肱骨内固定装置去除术
1154	D07儿童骨科、骨盆外科	2024-02-28	2024-03-16	3484173	闫杰	男	33Y	跟骨骨折	脂肪肝	好转	翁益民	翁益民	王特	跟骨骨折切开复位钢板内固定术
1155	D07儿童骨科、骨盆外科	2024-03-03	2024-03-16	3484175	陈将敏	男	62Y	股骨粗隆间骨折	颈动脉硬化;肾结石;慢性鼻窦炎	治愈	孔建中	胡炜	陈墨川	股骨骨折闭合复位螺钉内固定术
1156	D07儿童骨科、骨盆外科	2024-03-11	2024-03-16	3484182	郑汉李	男	12Y	取除骨折内固定装置		其他	张敬东	闫广奎	朱瑞博	腓骨内固定装置去除术;胫骨内固定装置去除术
1157	D07儿童骨科、骨盆外科	2024-03-12	2024-03-16	3484183	谢馨怡	女	1Y	肱骨髁上骨折		治愈	张敬东	闫广奎	王伟	肱骨骨折闭合复位钢针内固定术
1158	D07儿童骨科、骨盆外科	2024-03-12	2024-03-16	3484187	郑哲宇	男	10Y	取除骨折内固定装置		其他	张敬东	易先宏	朱瑞博	胫骨内固定装置去除术
1159	D07儿童骨科、骨盆外科	2024-03-10	2024-03-17	3484456	冯日波	男	40Y	肱骨骨折	多发性腰椎骨折;小多角骨骨折;窦性心律失常;肋骨骨折	治愈	孔建中	胡炜	陈墨川	肱骨骨折切开复位钢板内固定术;肱骨植骨术
1160	D07儿童骨科、骨盆外科	2024-03-03	2024-03-17	3484459	金碎奶	女	82Y	跟骨骨折	肺部感染;糖尿病	治愈	孔建中	胡炜	陈墨川	跟骨骨折切开复位钢板内固定术;关节软骨修复术;跟骨植骨术;创面封闭式负压引流术（VSD)
1161	D07儿童骨科、骨盆外科	2024-03-09	2024-03-17	3484486	徐素芬	女	46Y	锁骨骨折	头部的损伤;脂肪肝;乳房恶性肿瘤个人史	治愈	孔建中	胡炜	陈墨川	锁骨骨折切开复位钢板内固定术;锁骨植骨术
1162	D07儿童骨科、骨盆外科	2024-02-28	2024-03-18	3484683	李永杰	男	57Y	开放性胫腓骨干骨折	腓骨骨折;耳损伤;肋骨骨折;肺诊断性影像异常;肝囊肿;尺骨冠突骨折;腰骶椎间盘突出;胸椎退行性病变;腰背部挫伤	治愈	孔建中	胡炜	陈墨川	胫骨骨折切开复位钢板内固定术;腓骨骨折闭合复位髓内针内固定术;皮肤和皮下坏死组织切除清创术;创面封闭式负压引流术（VSD);胫骨植骨术
1163	D07儿童骨科、骨盆外科	2024-03-13	2024-03-18	3484772	郑朝泽	男	1Y	肱骨髁上骨折	成骨不全	治愈	张敬东	闫广奎	朱瑞博	肱骨骨折闭合复位钢针内固定术
1164	D07儿童骨科、骨盆外科	2024-03-12	2024-03-18	3484799	吴联间	男	41Y	锁骨骨折	前列腺结石	好转	翁益民	翁益民	王特	锁骨骨折切开复位钢板内固定术
1165	D07儿童骨科、骨盆外科	2024-03-14	2024-03-19	3484956	黄语娜	女	5Y	肱骨外髁骨折		治愈	张敬东	易先宏	吴宗艺	肱骨骨折闭合复位钢针内固定术
1166	D07儿童骨科、骨盆外科	2024-03-14	2024-03-19	3484957	白植菲	女	10Y	取除骨折内固定装置		其他	张敬东	闫广奎	吴宗艺	尺骨内固定装置去除术
1167	D07儿童骨科、骨盆外科	2024-03-13	2024-03-19	3484994	吴紫灵	女	2Y	肱骨髁上骨折		治愈	张敬东	闫广奎	吴宗艺	肱骨骨折闭合复位钢针内固定术
1168	D07儿童骨科、骨盆外科	2024-03-14	2024-03-19	3485001	徐浩杰	男	11Y	取除骨折内固定装置		其他	张敬东	李玉安	吴宗艺	胫骨内固定装置去除术;腓骨内固定装置去除术
1169	D07儿童骨科、骨盆外科	2024-03-16	2024-03-20	3485226	刘家富	男	89Y	股骨粗隆间骨折	肺恶性肿瘤;陈旧性腰椎骨折;颈动脉硬化;多发性肝囊肿;后天性肾囊肿;贫血;低蛋白血症	未愈	孔建中	胡炜	陈墨川
1170	D07儿童骨科、骨盆外科	2024-03-17	2024-03-20	3485228	倪悦豪	男	7Y	取除骨折内固定装置		其他	张敬东	闫广奎	吴宗艺	桡骨内固定装置去除术
1171	D07儿童骨科、骨盆外科	2024-03-03	2024-03-20	3485236	薛圣韩	男	12Y	股骨良性肿瘤	肿瘤性病理性骨折	治愈	张敬东	闫广奎	吴宗艺	股骨病损切除术;股骨骨折切开复位钢针内固定术;股骨植骨术
1172	D07儿童骨科、骨盆外科	2024-03-04	2024-03-20	3485240	张月英	女	63Y	胫骨平台骨折	外踝骨折;高血压;糖尿病;脂肪肝;膝关节退行性病变	治愈	孔建中	胡炜	陈墨川	胫骨骨折切开复位钢针内固定术;关节软骨修复术;胫骨植骨术
1173	D07儿童骨科、骨盆外科	2024-03-16	2024-03-20	3485241	任宇涛	男	3Y	取除骨折内固定装置		其他	张敬东	闫广奎	吴宗艺	股骨内固定装置去除术
1174	D07儿童骨科、骨盆外科	2024-03-17	2024-03-20	3485246	林屹	男	6Y	肱骨髁上骨折		治愈	张敬东	闫广奎	吴宗艺	肱骨骨折闭合复位钢针内固定术
1175	D07儿童骨科、骨盆外科	2024-03-16	2024-03-20	3485247	刘先飞	男	7Y	取除骨折内固定装置	股骨头缺血性坏死	其他	张敬东	闫广奎	吴宗艺	股骨内固定装置去除术
1176	D07儿童骨科、骨盆外科	2024-03-16	2024-03-21	3485545	何博衍	男	2Y	肱骨髁上骨折		治愈	张敬东	闫广奎	王伟	肱骨骨折闭合复位钢针内固定术
1177	D07儿童骨科、骨盆外科	2024-03-08	2024-03-22	3485245	陈莲竹	女	56Y	三踝骨折	踝关节脱位;踝三角韧带损伤;肝囊肿	治愈	孔建中	胡炜	陈墨川	踝关节骨折切开复位钢板内固定术;关节软骨修复术;踝融合术
1178	D07儿童骨科、骨盆外科	2024-03-19	2024-03-22	3485713	白瑾萱	女	7Y	取除骨折内固定装置		其他	张敬东	闫广奎	吴宗艺	股骨内固定装置去除术
1179	D07儿童骨科、骨盆外科	2024-03-19	2024-03-22	3485729	李紫晴	女	1Y	肱骨髁上骨折		治愈	张敬东	闫广奎	毛诚晃	肱骨骨折闭合复位钢针内固定术
1180	D07儿童骨科、骨盆外科	2024-03-17	2024-03-22	3485784	徐定县	男	63Y	盖氏骨折	肺炎;肺诊断性影像异常;甲状腺结节;多发性肝囊肿;后天性肾囊肿;甲状腺钙化	治愈	孔建中	胡炜	陈墨川	桡骨骨折切开复位钢板内固定术
1181	D07儿童骨科、骨盆外科	2024-03-18	2024-03-23	3485901	李志鹏	男	14Y	取除骨折内固定装置		其他	张敬东	李玉安	王伟	胫骨内固定装置去除术
1182	D07儿童骨科、骨盆外科	2024-03-13	2024-03-23	3485903	李赛娥	女	53Y	肱骨近端骨折	肺诊断性影像异常;多发性肝囊肿	治愈	孔建中	胡炜	陈墨川	肱骨骨折切开复位钢板内固定术;肱骨植骨术;肩关节成形术
1183	D07儿童骨科、骨盆外科	2024-03-14	2024-03-23	3485904	郑益永	男	60Y	内踝骨折	腓骨骨折;脂肪肝;后天性肾囊肿;踝骨闭合性骨折	治愈	孔建中	胡炜	陈墨川	踝关节骨折切开复位螺钉内固定术;胫骨骨折切开复位钢板内固定术;关节软骨修复术;腓骨植骨术
1184	D07儿童骨科、骨盆外科	2024-03-05	2024-03-24	3486183	陈崇英	女	76Y	胫腓骨闭合性骨折	肺诊断性影像异常;肾结石;心功能不全	好转	翁益民	翁益民	王特	腓骨骨折闭合复位髓内针内固定术;胫骨骨折切开复位钢板内固定术
1185	D07儿童骨科、骨盆外科	2024-03-05	2024-03-24	3486186	叶凯特	男	38Y	跟骨骨折	腕舟骨骨折;支气管扩张伴感染;肺诊断性影像异常	好转	翁益民	翁益民	王特	跟骨骨折切开复位钢板内固定术;跟骨植骨术;跟骨骨折闭合复位螺钉内固定术
1186	D07儿童骨科、骨盆外科	2024-03-11	2024-03-24	3486189	杨百玲	女	41Y	髌骨骨折	肝囊肿;肺钙化	好转	翁益民	翁益民	王特	髌骨骨折切开复位张力带钢丝内固定术
1187	D07儿童骨科、骨盆外科	2024-03-12	2024-03-24	3486197	郑金兰	女	67Y	股骨颈骨折	骨质疏松;下肢静脉血栓形成;心功能不全;肺间质纤维化	好转	翁益民	翁益民	王特	全髋关节置换;髋轴面，陶瓷与金属
1188	D07儿童骨科、骨盆外科	2024-03-19	2024-03-24	3486215	朱灯航	男	4Y	肱骨髁上骨折		治愈	张敬东	闫广奎	朱瑞博	肱骨骨折闭合复位钢针内固定术
1189	D07儿童骨科、骨盆外科	2024-03-18	2024-03-24	3486304	王垂勇	男	4Y	尺骨和桡骨下端均骨折		好转	张敬东	闫广奎	朱瑞博	桡骨骨折切开复位钢针内固定术
1190	D07儿童骨科、骨盆外科	2024-03-20	2024-03-25	3486470	庄再柯	男	12Y	取除骨折内固定装置		其他	张敬东	闫广奎	吴宗艺	尺骨内固定装置去除术;桡骨内固定装置去除术
1191	D07儿童骨科、骨盆外科	2024-03-04	2024-03-25	3486504	鄢香高	男	58Y	开放性胫骨下端骨折	内踝骨折;胫骨平台骨折;胫腓远端关节脱位;多发性腰椎骨折;胸椎多处骨折;腰椎间盘突出	治愈	孔建中	胡炜	陈墨川	胫骨骨折切开复位钢板内固定术;踝关节骨折切开复位螺钉内固定术;踝融合术;关节软骨修复术;胫骨植骨术;胫骨骨折切开复位钢板内固定术;关节软骨修复术;胫骨植骨术;跟骨牵引术;皮肤和皮下坏死组织切除清创术
1192	D07儿童骨科、骨盆外科	2024-03-20	2024-03-26	3486794	郑帆	男	12Y	取除骨折内固定装置		其他	张敬东	闫广奎	吴宗艺	胫骨内固定装置去除术;皮肤瘢痕切除术
1193	D07儿童骨科、骨盆外科	2024-03-17	2024-03-26	3486797	蔡爱文	女	62Y	锁骨骨折	肋骨骨折;肺诊断性影像异常;胸腔积液;肾结石	好转	翁益民	翁益民	王特	锁骨骨折切开复位钢板内固定术;锁骨植骨术
1194	D07儿童骨科、骨盆外科	2024-03-22	2024-03-26	3486803	陈月红	女	66Y	桡骨远端骨折	肝囊肿	好转	孔建中	翁益民	王特
1195	D07儿童骨科、骨盆外科	2024-03-20	2024-03-26	3486804	王翠娥	女	76Y	胫腓骨下端骨折	双踝骨折;尺骨茎突骨折伴桡骨远端骨折	好转	翁益民	翁益民	王特
1196	D07儿童骨科、骨盆外科	2024-03-24	2024-03-26	3486992	陈泽瑜	男	1Y	肱骨外髁骨折		治愈	张敬东	闫广奎	吴宗艺	肱骨骨折切开复位钢针内固定术;关节软骨修复术
1197	D07儿童骨科、骨盆外科	2024-02-25	2024-03-27	3487088	潘宇泽	男	4Y	开放性胫腓骨下端骨折	创伤性硬膜下出血;头部的损伤;创伤后伤口感染;趾伸肌腱断裂	治愈	张敬东	李玉安	吴宗艺	趾肌腱缝合术;皮肤和皮下坏死组织切除清创术;腓骨骨折切开复位钢针内固定术;胫骨骨折切开复位钢针内固定术
1198	D07儿童骨科、骨盆外科	2024-03-16	2024-03-27	3487089	谢乐康	男	16Y	髌骨骨折	膝关节僵硬;骨折术后	治愈	孔建中	胡炜	陈墨川	髌骨骨折切开复位张力带钢丝内固定术;膝关节松解术;股四头肌成形术
1199	D07儿童骨科、骨盆外科	2024-03-23	2024-03-27	3487092	伊璐晨	女	6Y	取除骨折内固定装置		其他	张敬东	闫广奎	吴宗艺	桡骨内固定装置去除术;尺骨内固定装置去除术
1200	D07儿童骨科、骨盆外科	2024-03-23	2024-03-28	3487420	宋恩铠	男	4Y	肱骨髁上骨折		治愈	张敬东	闫广奎	王伟	肱骨骨折闭合复位钢针内固定术
1201	D07儿童骨科、骨盆外科	2024-03-22	2024-03-28	3487425	彭易豪	男	10Y	胫腓骨下端骨折	精神发育迟缓，未提及行为缺陷	治愈	张敬东	闫广奎	吴宗艺	腓骨骨折切开复位钢板内固定术;胫骨骨折闭合复位髓内针内固定术
1202	D07儿童骨科、骨盆外科	2024-03-20	2024-03-28	3487483	林成乐	男	12Y	尺骨鹰嘴骨折	跖骨骨折;皮下血肿;手术后状态，其他特指的	治愈	张敬东	闫广奎	吴宗艺	尺骨骨折切开复位钢针内固定术
1203	D07儿童骨科、骨盆外科	2024-03-20	2024-03-29	3487664	陈如一	男	49Y	三踝骨折	脂肪肝;肝囊肿	治愈	翁益民	翁益民	王特	踝关节骨折切开复位钢板内固定术;踝融合术;关节软骨修复术
1204	D07儿童骨科、骨盆外科	2024-03-17	2024-03-29	3487668	项柏仁	男	65Y	髌骨骨折	膝关节退行性病变;腰椎术后	治愈	翁益民	翁益民	王特	髌骨骨折切开复位张力带钢丝内固定术
1205	D07儿童骨科、骨盆外科	2024-03-20	2024-03-29	3487669	周国英	女	60Y	胫骨平台骨折	膝关节退行性病变;肺大疱;肺诊断性影像异常;肝囊肿;肾错构瘤;心功能不全	治愈	翁益民	翁益民	王特	胫骨骨折切开复位钢板内固定术;胫骨植骨术
1206	D07儿童骨科、骨盆外科	2024-03-14	2024-03-29	3487670	潘丽芬	女	46Y	胫骨远端骨折伴腓骨骨折	慢性乙型病毒性肝炎;胆囊息肉	治愈	翁益民	翁益民	王特	胫骨骨折切开复位钢板内固定术;胫骨植骨术;腓骨骨折闭合复位髓内针内固定术
1207	D07儿童骨科、骨盆外科	2024-03-23	2024-03-30	3487770	周齐力	男	5Y	肱骨髁上骨折		治愈	张敬东	闫广奎	吴宗艺	肱骨骨折闭合复位钢针内固定术
1208	D07儿童骨科、骨盆外科	2024-03-26	2024-03-30	3487776	李瑾涵	女	8Y	桡骨颈骨折		治愈	张敬东	闫广奎	吴宗艺	桡骨骨折闭合复位髓内针内固定术
1209	D07儿童骨科、骨盆外科	2024-03-23	2024-03-30	3487784	潘凤彩	女	90Y	股骨颈骨折	颈动脉硬化;下肢静脉血栓形成;肝钙化灶;肝囊肿;心包积液	治愈	孔建中	胡炜	陈墨川	人工股骨头置换术;髋关节滑膜切除术
1210	D07儿童骨科、骨盆外科	2024-03-22	2024-03-30	3487796	陈龙翠	女	86Y	股骨粗隆间骨折	髋关节置换术后;肾积水伴肾结石;窦性心动过速;后天性肾囊肿;颈动脉硬化	治愈	孔建中	胡炜	陈墨川	股骨骨折切开复位螺钉内固定术;股骨植骨术;股骨颈/股骨转子间骨折手法整复术
1211	D07儿童骨科、骨盆外科	2024-03-24	2024-03-30	3487802	吴祥妹	女	83Y	股骨粗隆间骨折	肺诊断性影像异常;肺大疱;胸腔积液;下肢静脉曲张	治愈	孔建中	胡炜	陈墨川	股骨骨折闭合复位螺钉内固定术
1212	D07儿童骨科、骨盆外科	2024-03-19	2024-03-30	3487804	徐博	男	12Y	双踝骨折	唐氏综合征\[先天愚型\]	治愈	吴宗艺	李玉安	吴宗艺	踝关节骨折切开复位钢针内固定术;关节软骨修复术
1213	D07儿童骨科、骨盆外科	2024-03-25	2024-03-30	3487813	陈灏瀚	男	2Y	肱骨髁上骨折		治愈	张敬东	闫广奎	吴宗艺	肱骨骨折闭合复位钢针内固定术
1214	D07儿童骨科、骨盆外科	2024-03-26	2024-03-30	3488047	周秋微	女	47Y	股骨骨折	多发性肝囊肿;陈旧性肋骨骨折;肺诊断性影像异常;支气管扩张伴感染;下肢静脉血栓形成	治愈	孔建中	胡炜	陈墨川	股骨骨折闭合复位髓内针内固定术
1215	D07儿童骨科、骨盆外科	2024-03-10	2024-03-31	3488152	陈思仁	男	53Y	耻骨骨折	骶骨骨折;肩胛骨骨折;肱骨近端骨折;肋骨多处骨折;多发性腰椎骨折;陈旧性胸椎骨折;创伤性胸腔积液;创伤性气胸;骨质疏松，其他的;腰背部挫伤	治愈	孔建中	胡炜	陈墨川	骨盆骨折切开复位钢板内固定术;骨盆骨折闭合复位内固定术;髂动脉栓塞术;腰动脉栓塞术;经皮穿刺脊柱后凸成形术
1216	D07儿童骨科、骨盆外科	2024-03-24	2024-03-31	3488228	庞小胡	女	49Y	肱骨大结节骨折	肩关节脱位;肺不张;肺诊断性影像异常;支气管扩张(症);毁损肺	治愈	孔建中	胡炜	陈墨川	肱骨骨折切开复位钢板内固定术;肩关节成形术
1217	D07儿童骨科、骨盆外科	2024-03-16	2024-03-31	3488232	蔡文燕	女	55Y	双踝骨折	尺骨茎突骨折伴桡骨远端骨折;肺诊断性影像异常	治愈	翁益民	翁益民	王特	踝关节骨折切开复位钢板内固定术;桡骨骨折闭合复位螺钉内固定术;尺骨骨折闭合复位螺钉内固定术
1218	D07儿童骨科、骨盆外科	2024-03-28	2024-04-01	3488481	林子业	男	15Y	取除骨折内固定装置		其他	张敬东	易先宏	吴宗艺	股骨内固定装置去除术
1219	D07儿童骨科、骨盆外科	2024-03-12	2024-04-02	3488816	林花	女	59Y	肘关节脱位	尺骨和桡骨下端均骨折;肾结石;心功能不全;尺骨冠突骨折;桡骨头骨折	好转	翁益民	翁益民	王特	肘关节融合术;桡骨骨折切开复位钢板内固定术;肘关节韧带修补术;桡骨骨折闭合性复位术;桡骨外固定术
1220	D07儿童骨科、骨盆外科	2024-03-25	2024-04-02	3488817	方克	男	35Y	取除骨折内固定装置	脂肪肝;后天性肾囊肿;肾盂囊肿	其他	翁益民	翁益民	王特	踝关节内固定装置去除术
1221	D07儿童骨科、骨盆外科	2024-03-17	2024-04-02	3488818	程如育	男	49Y	尺骨远端骨折伴桡骨远端骨折	手术后状态，其他特指的;慢性乙型病毒性肝炎;肺诊断性影像异常;肾结石;前列腺增生;前列腺结石	好转	翁益民	翁益民	王特	桡骨骨折切开复位钢板内固定术;尺骨骨折闭合性复位术;桡骨骨折闭合性复位术;桡骨和尺骨使用外固定装置
1222	D07儿童骨科、骨盆外科	2024-03-24	2024-04-02	3488821	白洪祥	男	50Y	股骨颈骨折	颈椎病;腰椎间盘突出;听力减退;肺诊断性影像异常;肺钙化	好转	翁益民	翁益民	王特	股骨骨折闭合复位螺钉内固定术
1223	D07儿童骨科、骨盆外科	2024-03-27	2024-04-02	3488825	徐晨阳	男	6Y	趾骨骨折		治愈	张敬东	闫广奎	吴宗艺	趾骨骨折切开复位钢针内固定术;关节软骨修复术
1224	D07儿童骨科、骨盆外科	2024-03-30	2024-04-02	3488827	吴秀宇	男	8Y	取除骨折内固定装置		其他	张敬东	李玉安	吴宗艺	尺骨内固定装置去除术
1225	D07儿童骨科、骨盆外科	2024-03-28	2024-04-03	3489092	陈毅轩	男	10Y	开放性特指趾骨骨折		治愈	张敬东	李玉安	朱瑞博	趾骨骨折切开复位钢针内固定术;皮肤和皮下坏死组织切除清创术
1226	D07儿童骨科、骨盆外科	2024-03-26	2024-04-04	3489447	高兰妹	女	60Y	跟骨骨折	慢性乙型病毒性肝炎;子宫切除术后状态;脂肪肝;心功能不全;糖尿病	好转	翁益民	翁益民	王特	跟骨骨折闭合复位螺钉内固定术
1227	D07儿童骨科、骨盆外科	2024-03-31	2024-04-04	3489468	林子义	男	1Y	肱骨髁上骨折		治愈	张敬东	李玉安	朱瑞博	肱骨骨折闭合复位钢针内固定术
1228	D07儿童骨科、骨盆外科	2024-04-02	2024-04-04	3489586	郑永浩	男	11Y	取除骨折内固定装置		其他	张敬东	易先宏	吴宗艺	肱骨内固定装置去除术
1229	D07儿童骨科、骨盆外科	2024-03-23	2024-04-05	3489628	王玉娥	女	55Y	三踝骨折	肺大疱;多发性肝囊肿;焦虑性神经症	好转	翁益民	翁益民	王特	踝关节骨折切开复位钢板内固定术
1230	D07儿童骨科、骨盆外科	2024-03-26	2024-04-05	3489629	王阿菊	女	82Y	股骨粗隆间骨折	慢性支气管炎;肺气肿;肺部感染;胸腔积液;后天性肾囊肿	好转	翁益民	翁益民	王特	股骨骨折闭合复位髓内针内固定术;股骨植骨术
1231	D07儿童骨科、骨盆外科	2024-04-02	2024-04-05	3489632	曾奉	男	14Y	取除骨折内固定装置		其他	张敬东	李玉安	吴宗艺	锁骨内固定装置去除术
1232	D07儿童骨科、骨盆外科	2024-03-24	2024-04-05	3489633	卢小朋	男	34Y	胫骨平台骨折	骨折术后;膝关节外侧副韧带损伤;膝关节前十字韧带损伤;膝关节积液;银屑病;小腿挫伤	好转	翁益民	翁益民	王特	胫骨骨折切开复位钢板内固定术
1233	D07儿童骨科、骨盆外科	2024-04-02	2024-04-05	3489636	施睿阳	男	11Y	取除骨折内固定装置		其他	张敬东	李玉安	朱瑞博	桡骨内固定装置去除术;尺骨内固定装置去除术
1234	D07儿童骨科、骨盆外科	2024-03-17	2024-04-05	3489699	张中喜	男	46Y	踝开放性伤口	足背动脉损伤;跟骨骨折;后天性肾囊肿;肺诊断性影像异常;前列腺增生;肾钙化	好转	翁益民	翁益民	王特	皮肤和皮下坏死组织切除清创术;创面封闭式负压引流术（VSD);足血管、神经、肌腱探查术;下肢肌肉缝合术;肌肉粘连松解术
1235	D07儿童骨科、骨盆外科	2024-04-02	2024-04-06	3489823	郑静萱	女	7Y	尺骨上端骨折	桡骨上端骨折	好转	张敬东	李玉安	吴宗艺	尺骨骨折闭合复位髓内针内固定术;桡骨骨折闭合复位髓内针内固定术
1236	D07儿童骨科、骨盆外科	2024-03-29	2024-04-06	3489857	徐步洋	男	15Y	锁骨骨折	肩锁关节脱位	治愈	陈龙	应晓洲	应晓洲	锁骨骨折切开复位钢板内固定术;肩锁关节脱位切开复位内固定术
1237	D07儿童骨科、骨盆外科	2024-03-27	2024-04-06	3489871	徐珏静	女	65Y	尺骨冠突骨折	肱骨外髁骨折;前臂伸肌损伤;脂肪肝;关节不稳定	治愈	孔建中	胡炜	陈墨川	尺骨骨折切开复位钢板内固定术;关节软骨修复术;肱骨骨折切开复位内固定术;前臂肌腱缝合术;肘关节融合术
1238	D07儿童骨科、骨盆外科	2024-03-30	2024-04-07	3490142	田梓鑫	男	2Y	股骨干骨折		治愈	张敬东	李玉安	朱瑞博	股骨骨折闭合复位髓内针内固定术
1239	D07儿童骨科、骨盆外科	2024-03-30	2024-04-07	3490146	温花妹	女	61Y	股骨粗隆间骨折	肺部感染;支气管扩张(症);糖尿病	治愈	孔建中	胡炜	陈墨川	股骨骨折闭合复位螺钉内固定术
1240	D07儿童骨科、骨盆外科	2024-03-28	2024-04-07	3490153	滕锡南	男	62Y	股骨干骨折	股骨髁间骨折;胆囊结石;脂肪肝;肝钙化灶;前列腺结石;前列腺增生	治愈	孔建中	胡炜	陈墨川	股骨骨折切开复位螺钉内固定术;关节软骨修复术;股骨植骨术
1241	D07儿童骨科、骨盆外科	2024-03-26	2024-04-07	3490159	夏讯涛	男	43Y	跟骨骨折	脂肪肝	好转	翁益民	翁益民	王特	跟骨骨折切开复位钢板内固定术;跟骨植骨术
1242	D07儿童骨科、骨盆外科	2024-03-26	2024-04-08	3490444	陈振赫	男	4Y	肱骨外科颈骨折	肺挫伤;创伤性气胸;肝挫伤;多处挫伤;单侧睾丸未降	治愈	张敬东	李玉安	吴宗艺	肱骨骨折闭合复位髓内针内固定术
1243	D07儿童骨科、骨盆外科	2024-03-29	2024-04-08	3490547	叶高松	男	51Y	胫骨平台伴腓骨骨折	胫骨骨干骨折;肺诊断性影像异常;肝钙化灶	治愈	孔建中	胡炜	陈墨川	胫骨骨折切开复位钢板内固定术;腓骨骨折切开复位钢板内固定术;关节软骨修复术;膝关节半月板成形术;下肢韧带缝合术
1244	D07儿童骨科、骨盆外科	2024-04-04	2024-04-08	3490682	夏崇玉	女	76Y	股骨头缺血性坏死	骨折术后;具有心脏和血管植入物和移植物;髋关节退行性病变;肺诊断性影像异常	好转	翁益民	翁益民	王特
1245	D07儿童骨科、骨盆外科	2024-03-26	2024-04-09	3490877	陈伦柱	男	7Y	跟骨骨折	楔状骨骨折(足);腰椎骨折;跖骨骨折	治愈	张敬东	闫广奎	吴宗艺	跟骨骨折切开复位钢板内固定术;关节软骨修复术
1246	D07儿童骨科、骨盆外科	2024-04-07	2024-04-09	3490879	金洛一	男	1Y	肱骨髁上骨折		治愈	张敬东	李玉安	朱瑞博	肱骨骨折闭合复位钢针内固定术
1247	D07儿童骨科、骨盆外科	2024-04-06	2024-04-09	3490882	陈加楠	男	11Y	取除骨折内固定装置		其他	张敬东	闫广奎	吴宗艺	尺骨内固定装置去除术
1248	D07儿童骨科、骨盆外科	2024-04-06	2024-04-09	3490888	张思邈	男	6Y	取除骨折内固定装置		其他	张敬东	易先宏	吴宗艺	股骨内固定装置去除术
1249	D07儿童骨科、骨盆外科	2024-04-06	2024-04-09	3490891	戴润泽	男	13Y	取除骨折内固定装置		其他	张敬东	闫广奎	吴宗艺	尺骨内固定装置去除术
1250	D07儿童骨科、骨盆外科	2024-04-06	2024-04-10	3491142	潘利	男	12Y	取除骨折内固定装置		其他	张敬东	闫广奎	朱瑞博	胫骨内固定装置去除术
1251	D07儿童骨科、骨盆外科	2024-03-28	2024-04-10	3491165	林美钗	女	74Y	锁骨骨折	两根肋骨骨折不伴第一肋骨骨折;坐骨骨折;脂肪肝;心功能不全;下肢静脉血栓形成;腔隙性脑梗死;颈椎病;高血压;糖尿病	好转	翁益民	翁益民	王特	锁骨骨折切开复位钢板内固定术
1252	D07儿童骨科、骨盆外科	2024-03-29	2024-04-10	3491201	周全	男	58Y	髌骨骨折	胆囊息肉;前列腺结石;心功能不全	好转	翁益民	翁益民	王特	髌骨骨折切开复位张力带钢丝内固定术
1253	D07儿童骨科、骨盆外科	2024-03-16	2024-04-10	3491221	滕世光	男	60Y	胫骨远端骨折伴腓骨骨折	高血压;糖尿病;头皮血肿;颈动脉硬化	治愈	孔建中	胡炜	陈墨川	胫骨骨折切开复位钢板内固定术;腓骨骨折切开复位髓内针内固定术
1254	D07儿童骨科、骨盆外科	2024-03-25	2024-04-10	3491271	刘金花	女	55Y	肱骨骨折	肋骨多处骨折;创伤性胸腔积液;心包积液;肺挫伤;创伤性湿肺;髋臼骨折;腰椎骨折L4;腰椎间盘突出;多处挫伤;肾肿物;肾结石;耻骨骨折;盆腔积液;头皮血肿;肝回声不均	治愈	翁益民	翁益民	王特	肱骨骨折切开复位钢板内固定术;肱骨植骨术
1255	D07儿童骨科、骨盆外科	2024-03-24	2024-04-10	3491279	陈帮星	男	48Y	胫腓骨干骨折	踝开放性伤口;多处挫伤;头皮血肿;肺诊断性影像检查的异常所见;肺气肿合并肺大泡	好转	翁益民	翁益民	王特	胫骨骨折切开复位钢板内固定术;腓骨骨折闭合复位髓内针内固定术;皮肤和皮下坏死组织切除清创术;创面封闭式负压引流术（VSD);皮肤缝合术;肌腱、血管、神经探查术
1256	D07儿童骨科、骨盆外科	2024-04-04	2024-04-11	3491584	陈霖	男	3Y	肱骨外髁骨折		治愈	张敬东	闫广奎	吴宗艺	肱骨骨折切开复位钢针内固定术
1257	D07儿童骨科、骨盆外科	2024-04-09	2024-04-11	3491588	倪豪	男	7Y	取除骨折内固定装置		其他	张敬东	闫广奎	朱瑞博	桡骨内固定装置去除术
1258	D07儿童骨科、骨盆外科	2024-04-09	2024-04-12	3491811	林轶楠	男	7Y	取除骨折内固定装置		其他	张敬东	王伟	吴宗艺	腓骨内固定装置去除术
1259	D07儿童骨科、骨盆外科	2024-04-08	2024-04-13	3492054	陈欣雅	女	3Y	肱骨髁上骨折		治愈	张敬东	闫广奎	吴宗艺	肱骨骨折闭合复位钢针内固定术
1260	D07儿童骨科、骨盆外科	2024-04-10	2024-04-13	3492059	庄逸轩	男	6Y	肱骨髁上骨折		治愈	张敬东	李玉安	王伟	肱骨骨折闭合复位钢针内固定术
1261	D07儿童骨科、骨盆外科	2024-04-07	2024-04-13	3492095	柯寿明	男	80Y	股骨粗隆间骨折	股骨头缺血性坏死;下肢动脉粥样硬化;下肢静脉血栓形成;肝囊肿;肾结石;髋关节退行性病变	治愈	孔建中	胡炜	胡炜	股骨骨折闭合复位螺钉内固定术
1262	D07儿童骨科、骨盆外科	2024-04-05	2024-04-13	3492110	陈松奶	男	57Y	肱骨近端骨折	踝挫伤;脂肪肝;痛风;膝关节退行性病变	治愈	孔建中	陈墨川	胡炜	胫骨骨折切开复位钢板内固定术;胫骨植骨术;肩关节成形术
1263	D07儿童骨科、骨盆外科	2024-04-03	2024-04-14	3492379	周玉妹	女	91Y	股骨粗隆间骨折	骨质疏松;肝囊肿;肺动脉高压中度;肺诊断性影像异常;心功能不全;贫血	好转	翁益民	翁益民	王特	股骨骨折闭合复位髓内针内固定术;股骨植骨术
1264	D07儿童骨科、骨盆外科	2024-04-11	2024-04-14	3492385	徐烨彤	女	2Y	股骨干骨折		治愈	张敬东	闫广奎	吴宗艺	股骨骨折闭合复位术;石膏绷带固定
1265	D07儿童骨科、骨盆外科	2024-03-27	2024-04-14	3492388	曾小华	女	59Y	胫骨平台骨折	膝关节半脱位;多发性腰椎骨折;腰椎间盘突出;胸腔积液;胸膜肥厚;胸膜钙化;眼术后	治愈	孔建中	陈墨川	陈墨川	胫骨骨折切开复位钢板内固定术;膝脱位开放性复位术;膝关节半月板成形术;胫骨植骨术;关节软骨修复术
1266	D07儿童骨科、骨盆外科	2024-04-11	2024-04-14	3492410	林朝乐	男	4Y	取除骨折内固定装置		其他	张敬东	闫广奎	吴宗艺	股骨内固定装置去除术
1267	D07儿童骨科、骨盆外科	2024-04-01	2024-04-14	3492447	徐明海	男	50Y	胫腓骨下端骨折	肝硬化;肝囊肿;前列腺结石;踝关节关节病;脾大	好转	翁益民	翁益民	王特	胫骨骨折切开复位钢板内固定术;腓骨骨折闭合复位髓内针内固定术;胫骨植骨术
1268	D07儿童骨科、骨盆外科	2024-03-29	2024-04-15	3492686	张维录	男	50Y	胫骨远端骨折伴腓骨骨折	肺气肿;肺诊断性影像异常;后天性肾囊肿	治愈	孔建中	陈墨川	胡炜	胫骨骨折切开复位钢板内固定术;胫骨植骨术;腓骨骨折闭合复位髓内针内固定术
1269	D07儿童骨科、骨盆外科	2024-03-29	2024-04-15	3492698	朱思银	男	69Y	股骨粗隆间骨折	支气管扩张(症);肺诊断性影像异常;前列腺增生;前列腺结石;心功能不全	好转	翁益民	翁益民	王特	股骨骨折闭合复位髓内针内固定术
1270	D07儿童骨科、骨盆外科	2024-04-05	2024-04-15	3492722	翁慧仪	女	11Y	股骨远端骨折		治愈	张敬东	闫广奎	吴宗艺	股骨骨折闭合复位钢针内固定术
1271	D07儿童骨科、骨盆外科	2024-04-10	2024-04-15	3492801	朱修豪	男	4Y	肱骨外髁骨折		治愈	张敬东	易先宏	朱瑞博	肱骨骨折切开复位钢针内固定术;关节软骨修复术
1272	D07儿童骨科、骨盆外科	2024-04-11	2024-04-15	3492804	刘瑜莹	女	11Y	取除骨折内固定装置		其他	张敬东	闫广奎	闫广奎	肱骨内固定装置去除术
1273	D07儿童骨科、骨盆外科	2024-04-10	2024-04-15	3492838	钱辰	女	10Y	肱骨内上髁骨折	尺侧副韧带断裂	治愈	张敬东	闫广奎	吴宗艺	肱骨骨折切开复位钢针内固定术;关节软骨修复术;肘关节韧带修补术
1274	D07儿童骨科、骨盆外科	2024-04-07	2024-04-15	3492913	叶婉婷	女	5Y	股骨干骨折		治愈	张敬东	李玉安	吴宗艺	股骨骨折闭合复位髓内针内固定术
1275	D07儿童骨科、骨盆外科	2024-04-06	2024-04-15	3492916	杨礼官	男	87Y	股骨粗隆间骨折	高血压;胆囊结石;前列腺增生;前列腺结石;桡骨远端骨折;下肢静脉血栓形成	治愈	孔建中	胡炜	胡炜	股骨骨折切开复位钢板内固定术;股骨植骨术
1276	D07儿童骨科、骨盆外科	2024-02-27	2024-04-15	3492918	胡彩媚	女	40Y	髂骨骨折	骶骨骨折;耻骨骨折;开放性跟骨骨折;跟骨骨折;距骨骨折;骰骨骨折;腰椎骨折L2;腰椎椎管狭窄;肋骨多处骨折;肝占位性病变;抑郁状态;脂肪肝;肝囊肿;肾结石	治愈	孔建中	陈墨川	胡炜	髂动脉栓塞术;腰椎骨折切开复位内固定术;腰椎椎板切除减压术;腰椎植骨术;皮肤和皮下坏死组织切除清创术;股骨牵引;骨盆骨折切开复位钢板内固定术;髋关节脱位切开复位内固定术;骨盆骨折切开复位钢板内固定术;皮肤和皮下坏死组织切除清创术;创面封闭式负压引流术（VSD)
1277	D07儿童骨科、骨盆外科	2024-04-09	2024-04-16	3493151	黄英良	男	77Y	踝关节骨折	2型糖尿病;2型糖尿病足;高血压;脂肪肝;后天性肾囊肿;膀胱结石;前列腺增生;下肢动脉粥样硬化;下肢动脉狭窄;轻度肺动脉高压;二尖瓣及三尖瓣关闭不全;心房颤动	治愈	孔建中	陈墨川	胡炜	踝关节骨折闭合性复位术;石膏绷带固定
1278	D07儿童骨科、骨盆外科	2024-04-10	2024-04-16	3493153	叶长飞	男	51Y	尺骨茎突骨折伴桡骨远端骨折	足舟状骨骨折	治愈	孔建中	陈墨川	胡炜	桡骨骨折闭合复位钢针内固定术;关节软骨修复术;尺骨骨折闭合复位钢针内固定术;跗骨骨折闭合性复位术;石膏绷带固定
1279	D07儿童骨科、骨盆外科	2024-04-10	2024-04-16	3493156	傅文博	男	8Y	肱骨髁上骨折	前臂桡神经损伤;前臂桡动脉损伤;肩和上臂神经损伤	治愈	张敬东	闫广奎	吴宗艺	肱骨骨折闭合复位钢针内固定术
1280	D07儿童骨科、骨盆外科	2024-04-09	2024-04-16	3493158	谢梓豪	男	4Y	髋关节脱位	锁骨骨折	好转	张敬东	闫广奎	吴宗艺
1281	D07儿童骨科、骨盆外科	2024-04-06	2024-04-16	3493225	王青豪	男	9Y	股骨干骨折		治愈	张敬东	李玉安	吴宗艺	股骨骨折切开复位钢板内固定术
1282	D07儿童骨科、骨盆外科	2024-04-08	2024-04-16	3493228	王梓砚	男	10Y	股骨干骨折	成骨不全	治愈	张敬东	闫广奎	朱瑞博	股骨骨折切开复位髓内针内固定术;股骨内固定装置去除术
1283	D07儿童骨科、骨盆外科	2024-04-13	2024-04-16	3493230	金佳逸	女	4Y	肱骨髁上骨折	面部挫伤	治愈	张敬东	李玉安	吴宗艺	肱骨骨折闭合复位钢针内固定术
1284	D07儿童骨科、骨盆外科	2024-04-14	2024-04-16	3493236	薛雨萱	女	1Y	肱骨髁上骨折		治愈	张敬东	闫广奎	吴宗艺	肱骨骨折切开复位钢针内固定术
1285	D07儿童骨科、骨盆外科	2024-04-05	2024-04-17	3493465	林祖裕	男	89Y	股骨粗隆间骨折	胆囊结石;后天性肾囊肿;胸腔积液;慢性细支气管炎;肺气肿;间质性肺炎;前列腺增生;前列腺结石;手术后状态，其他特指的	好转	翁益民	翁益民	王特	股骨骨折闭合复位髓内针内固定术
1286	D07儿童骨科、骨盆外科	2024-04-04	2024-04-17	3493467	曾爱银	女	76Y	肱骨外科颈骨折	肺诊断性影像异常;后天性肾囊肿;高血压	好转	翁益民	翁益民	王特	肱骨骨折切开复位钢板内固定术;肱骨植骨术
1287	D07儿童骨科、骨盆外科	2024-04-04	2024-04-17	3493538	蔡奶儿	女	73Y	股骨颈骨折	膝关节退行性病变;胆囊结石;肺诊断性影像异常;高血压;糖尿病;耳鸣;心悸	好转	翁益民	翁益民	王特	人工股骨头置换术
1288	D07儿童骨科、骨盆外科	2024-04-04	2024-04-17	3493595	柯聚宇	男	14Y	胫腓骨下端骨折	脂肪肝;后天性肾囊肿	好转	翁益民	翁益民	王特	胫骨骨折切开复位钢板内固定术;腓骨骨折切开复位钢板内固定术
1289	D07儿童骨科、骨盆外科	2024-04-10	2024-04-17	3493600	陶忆雪	女	7Y	股骨干骨折		治愈	张敬东	闫广奎	吴宗艺	股骨骨折闭合复位髓内针内固定术
1290	D07儿童骨科、骨盆外科	2024-04-12	2024-04-17	3493609	金娇香	女	76Y	胫腓骨闭合性骨折	肺部感染;下肢动脉粥样硬化;颈动脉硬化;陈旧性肋骨骨折	治愈	孔建中	陈墨川	胡炜	胫骨骨折切开复位钢板内固定术;腓骨骨折闭合复位髓内针内固定术;腓骨植骨术
1291	D07儿童骨科、骨盆外科	2024-04-14	2024-04-18	3493830	金芳妤	女	13Y	取除骨折内固定装置		其他	张敬东	李玉安	吴宗艺	胫骨内固定装置去除术
1292	D07儿童骨科、骨盆外科	2024-04-16	2024-04-18	3493929	王宇	男	1Y	股骨干骨折		治愈	张敬东	李玉安	吴宗艺	股骨骨折闭合性复位术不伴内固定;石膏绷带固定
1293	D07儿童骨科、骨盆外科	2024-04-11	2024-04-19	3494158	杨陈烨	男	9Y	尺骨和桡骨下端均骨折	前臂神经损伤	治愈	张敬东	易先宏	吴宗艺	桡骨骨折切开复位钢板内固定术;尺骨骨折切开复位钢针内固定术
1294	D07儿童骨科、骨盆外科	2024-04-17	2024-04-20	3494309	叶瑞宣	男	72Y	肱骨外科颈骨折	高血压;糖尿病;高脂血症;多发性脑梗死	好转	孔建中	陈墨川	胡炜
1295	D07儿童骨科、骨盆外科	2024-04-09	2024-04-20	3494382	叶青菊	女	79Y	股骨颈骨折		好转	孔建中	陈墨川	胡炜	全髋关节置换;髋轴面，陶瓷与聚乙烯;髋关节滑膜切除术
1296	D07儿童骨科、骨盆外科	2024-04-16	2024-04-20	3494398	汤子煜	女	9Y	内踝骨折		治愈	张敬东	李玉安	吴宗艺	踝关节骨折闭合复位钢针内固定术;关节软骨修复术
1297	D07儿童骨科、骨盆外科	2024-04-10	2024-04-20	3494400	滕香妹	女	80Y	股骨粗隆间骨折	骨折术后;高血压;糖尿病;胸椎多处骨折;肌肉骨骼系统其他部位诊断性影像检查的异常所见	治愈	孔建中	陈墨川	胡炜	股骨骨折闭合复位螺钉内固定术;股骨植骨术
1298	D07儿童骨科、骨盆外科	2024-04-15	2024-04-20	3494405	张圣博	男	5Y	取除骨折内固定装置		其他	张敬东	李玉安	吴宗艺	胫骨内固定装置去除术
1299	D07儿童骨科、骨盆外科	2024-04-10	2024-04-20	3494410	周明善	男	87Y	股骨粗隆间骨折	后天性肾囊肿;前列腺增生;前列腺结石;肺诊断性影像异常;睾丸肿物	好转	翁益民	翁益民	王特	股骨骨折闭合复位髓内针内固定术;股骨植骨术
1300	D07儿童骨科、骨盆外科	2024-04-13	2024-04-20	3494429	甘博	男	9Y	肱骨外髁骨折		治愈	张敬东	闫广奎	吴宗艺	肱骨骨折切开复位钢针内固定术
1301	D07儿童骨科、骨盆外科	2024-04-10	2024-04-20	3494589	陈昌特	男	3Y	胫腓骨闭合性骨折	小腿挫伤;趾骨骨折	治愈	张敬东	王伟	吴宗艺	胫骨骨折闭合复位髓内针内固定术;拔甲术;石膏绷带固定
1302	D07儿童骨科、骨盆外科	2024-04-09	2024-04-21	3494764	方传巢	男	55Y	髂骨骨折	骶髂关节扭伤;耻骨骨折;腹膜后血肿;头皮裂伤;骨盆浅表损伤	治愈	孔建中	陈墨川	胡炜	髂骨植骨术;骨盆骨折切开复位钢板内固定术
1303	D07儿童骨科、骨盆外科	2024-04-04	2024-04-22	3495124	岳则启	男	56Y	胫腓骨下端骨折	肺诊断性影像检查的异常所见;多发性肝囊肿;心功能不全	好转	翁益民	翁益民	王特	腓骨骨折闭合复位髓内针内固定术;胫骨骨折切开复位钢板内固定术
1304	D07儿童骨科、骨盆外科	2024-04-18	2024-04-22	3495156	庄喆	男	13Y	取除骨折内固定装置		其他	张敬东	李玉安	吴宗艺	尺骨内固定装置去除术;桡骨内固定装置去除术
1305	D07儿童骨科、骨盆外科	2024-04-10	2024-04-22	3495157	杜阳锦城	男	3Y	肱骨髁上骨折	尺骨鹰嘴骨折;肺挫伤;创伤性气胸;骨盆骨折;锁骨骨折;第一肋骨骨折;肝挫伤;皮肤挫伤;中度贫血;心脏挫伤	治愈	张敬东	李玉安	吴宗艺	肱骨骨折闭合复位钢针内固定术;尺骨骨折闭合复位钢针内固定术
1306	D07儿童骨科、骨盆外科	2024-04-10	2024-04-22	3495165	郑荷兰	女	81Y	股骨颈骨折	陈旧性耻骨骨折;冠状动脉支架植入后状态;高血压	好转	翁益民	翁益民	王特	人工股骨头置换术
1307	D07儿童骨科、骨盆外科	2024-04-10	2024-04-22	3495195	潘正启	男	71Y	股骨粗隆间骨折	脂肪肝;肝回声不均;酒精性肝病;前列腺增生;肺气肿;腰椎术后;前列腺结石	好转	翁益民	翁益民	王特	股骨骨折闭合复位髓内针内固定术
1308	D07儿童骨科、骨盆外科	2024-04-15	2024-04-22	3495309	戴显德	男	53Y	股骨下端骨折	肺气肿;创伤性肾血肿;前列腺增生;前列腺结石	好转	翁益民	翁益民	王特	股骨骨折闭合复位髓内针内固定术
1309	D07儿童骨科、骨盆外科	2024-04-16	2024-04-23	3495418	林俊熙	男	5Y	肱骨髁上骨折	肩和上臂神经损伤	治愈	张敬东	李玉安	朱瑞博	肱骨骨折闭合复位钢针内固定术
1310	D07儿童骨科、骨盆外科	2024-04-18	2024-04-23	3495475	杨展鹏	男	9Y	肱骨外髁骨折		治愈	张敬东	李玉安	吴宗艺	肱骨骨折切开复位钢针内固定术
1311	D07儿童骨科、骨盆外科	2024-04-17	2024-04-24	3495649	陈宏辉	男	32Y	胫骨平台骨折	膝关节积液;小腿挫伤;大腿挫伤;膝关节十字韧带损伤;小腿后部肌群肌腱损伤;半月板撕裂，近期的	好转	翁益民	翁益民	王特
1312	D07儿童骨科、骨盆外科	2024-04-21	2024-04-24	3495772	陶泉宇	男	8Y	取除骨折内固定装置		其他	张敬东	李玉安	吴宗艺	肱骨内固定装置去除术
1313	D07儿童骨科、骨盆外科	2024-04-21	2024-04-24	3495853	王则达	男	8Y	取除骨折内固定装置		其他	张敬东	李玉安	吴宗艺	肱骨内固定装置去除术
1314	D07儿童骨科、骨盆外科	2024-04-15	2024-04-24	3495865	王加峻	男	5Y	胫骨干骨折		治愈	张敬东	李玉安	吴宗艺	胫骨骨折闭合复位髓内针内固定术
1315	D07儿童骨科、骨盆外科	2024-04-20	2024-04-24	3495877	邹子末	女	3Y	肱骨髁上骨折		治愈	张敬东	李玉安	王伟	肱骨骨折闭合复位钢针内固定术
1316	D07儿童骨科、骨盆外科	2024-04-22	2024-04-24	3495885	董恩瑞	男	3Y	指骨骨折		治愈	张敬东	李玉安	吴宗艺	指骨骨折闭合复位钢针内固定术
1317	D07儿童骨科、骨盆外科	2024-04-23	2024-04-24	3495913	孙宇泽	男	2Y	肱骨髁上骨折		治愈	张敬东	李玉安	吴宗艺	肱骨骨折闭合复位钢针内固定术
1318	D07儿童骨科、骨盆外科	2024-04-19	2024-04-25	3496199	严嘉杰	男	13Y	内踝骨折		治愈	张敬东	李玉安	吴宗艺	踝关节骨折切开复位钢针内固定术
1319	D07儿童骨科、骨盆外科	2024-04-20	2024-04-25	3496202	顾思睿	男	5Y	肱骨外髁骨折		治愈	张敬东	李玉安	吴宗艺	肱骨骨折闭合复位钢针内固定术
1320	D07儿童骨科、骨盆外科	2024-04-20	2024-04-25	3496227	蔡思姮	女	7Y	肱骨髁上骨折		治愈	张敬东	李玉安	吴宗艺	肱骨骨折闭合复位钢针内固定术
1321	D07儿童骨科、骨盆外科	2024-04-17	2024-04-25	3496356	卓雪迪	女	58Y	肱骨干骨折	肝囊肿;肺诊断性影像异常	治愈	孔建中	胡炜	陈墨川	肱骨骨折切开复位钢板内固定术;肱骨植骨术
1322	D07儿童骨科、骨盆外科	2024-04-20	2024-04-26	3496421	林勤	女	1Y	肱骨外髁骨折		治愈	张敬东	李玉安	吴宗艺	肱骨骨折切开复位钢针内固定术
1323	D07儿童骨科、骨盆外科	2024-04-24	2024-04-27	3496692	王毅泓	男	5Y	取除骨折内固定装置		其他	张敬东	李玉安	吴宗艺	尺骨内固定装置去除术
1324	D07儿童骨科、骨盆外科	2024-04-18	2024-04-27	3496695	黄笑秋	女	76Y	股骨颈骨折	糖尿病;高血压;高脂血症;慢性胃炎;下肢动脉粥样硬化;肝囊肿;后天性肾囊肿	治愈	孔建中	陈墨川	陈墨川	人工股骨头置换术;关节滑膜切除术
1325	D07儿童骨科、骨盆外科	2024-04-17	2024-04-27	3496697	张树博	男	11Y	肱骨内上髁骨折	尺骨鹰嘴骨折	治愈	张敬东	李玉安	吴宗艺	肱骨骨折切开复位钢针内固定术;尺骨骨折闭合复位钢针内固定术
1326	D07儿童骨科、骨盆外科	2024-04-17	2024-04-28	3496997	陈文杰	男	14Y	胫骨结节骨折		治愈	孔建中	陈墨川	陈墨川	胫骨骨折切开复位钢板内固定术;髌韧带缝合术
1327	D07儿童骨科、骨盆外科	2024-04-24	2024-04-28	3496998	黄宇辰	男	5Y	取除骨折内固定装置		其他	张敬东	李玉安	吴宗艺	股骨内固定装置去除术
1328	D07儿童骨科、骨盆外科	2024-04-22	2024-04-28	3497004	陈祥妹	女	76Y	股骨粗隆间骨折	糖尿病;脑梗死后遗症;肺诊断性影像检查的异常所见;肝钙化灶;下肢动脉粥样硬化	治愈	孔建中	陈墨川	陈墨川	股骨骨折闭合复位螺钉内固定术
1329	D07儿童骨科、骨盆外科	2024-04-22	2024-04-28	3497079	孙雨墨	女	3Y	肱骨外髁骨折		治愈	张敬东	李玉安	吴宗艺	关节软骨修复术;肱骨骨折切开复位钢针内固定术
1330	D07儿童骨科、骨盆外科	2024-04-17	2024-04-29	3497209	卓彬彬	女	22Y	踝关节骨折		好转	翁益民	翁益民	王特	踝关节骨折切开复位钢板内固定术;踝关节骨折闭合复位螺钉内固定术
1331	D07儿童骨科、骨盆外科	2024-04-16	2024-04-29	3497212	胡志君	男	35Y	跟骨骨折	肺诊断性影像检查的异常所见;肺气肿;后天性肾囊肿;肾结石;肝回声不均	好转	翁益民	翁益民	王特	跟骨骨折切开复位钢板内固定术
1332	D07儿童骨科、骨盆外科	2024-04-22	2024-04-29	3497266	黄振凤	女	89Y	股骨粗隆间骨折	肺诊断性影像检查的异常所见;肺大疱;陈旧性肋骨骨折;甲状腺结节;肾结石;后天性肾囊肿;心功能不全;肺部感染	好转	翁益民	翁益民	王特	股骨骨折闭合复位髓内针内固定术
1333	D07儿童骨科、骨盆外科	2024-04-16	2024-04-29	3497334	黄洢馨	女	6Y	胫腓骨下端骨折		治愈	张敬东	李玉安	朱瑞博	腓骨骨折切开复位钢板内固定术;胫骨骨折闭合复位髓内针内固定术
1334	D07儿童骨科、骨盆外科	2024-04-27	2024-04-29	3497336	孔欣彤	女	3Y	肱骨髁上骨折		治愈	张敬东	闫广奎	吴宗艺	肱骨骨折闭合复位钢针内固定术
1335	D07儿童骨科、骨盆外科	2024-04-20	2024-04-29	3497337	吴仁杰	男	3Y	开放性胫腓骨干骨折		治愈	张敬东	闫广奎	闫广奎	胫骨骨折闭合复位髓内针内固定术;腓骨骨折闭合性复位术;石膏绷带固定
1336	D07儿童骨科、骨盆外科	2024-04-17	2024-04-29	3497410	程宗宝	男	82Y	股骨粗隆间骨折	糖尿病;肺气肿;下肢动脉粥样硬化;胆囊息肉;后天性肾囊肿;肾结石;前列腺增生;前列腺结石	治愈	孔建中	陈墨川	陈墨川	股骨骨折闭合复位螺钉内固定术
1337	D07儿童骨科、骨盆外科	2024-04-20	2024-04-30	3497519	王叡	男	31Y	桡骨头骨折	尺骨近端骨折;肺诊断性影像检查的异常所见;窦性心动过缓	好转	翁益民	翁益民	王特	桡骨骨折切开复位钢板内固定术;关节软骨修复术;肘关节融合术
1338	D07儿童骨科、骨盆外科	2024-04-20	2024-04-30	3497604	陈鹏帆	男	12Y	开放性胫腓骨干骨折		治愈	张敬东	李玉安	吴宗艺	胫骨骨折闭合复位髓内针内固定术
1339	D07儿童骨科、骨盆外科	2024-04-17	2024-04-30	3497623	尤阿宝	女	94Y	股骨粗隆间骨折	肝囊肿;胆囊结石;后天性肾囊肿	治愈	孔建中	陈墨川	陈墨川	股骨骨折闭合复位螺钉内固定术
1340	D07儿童骨科、骨盆外科	2024-04-27	2024-04-30	3497779	廖荣甜	女	4Y	肱骨髁上骨折		治愈	张敬东	闫广奎	吴宗艺	肱骨骨折闭合复位钢针内固定术
1341	D07儿童骨科、骨盆外科	2024-04-22	2024-04-30	3497892	张玉初	女	40Y	肱骨近端骨折	慢性胃炎	治愈	孔建中	陈墨川	陈墨川	肱骨骨折切开复位钢板内固定术;肩关节成形术
1342	D07儿童骨科、骨盆外科	2024-04-27	2024-05-01	3497950	王昊天	女	7Y	肱骨髁上骨折		治愈	张敬东	闫广奎	朱瑞博	肱骨骨折闭合复位钢针内固定术
1343	D07儿童骨科、骨盆外科	2024-04-24	2024-05-01	3497989	周英香	女	82Y	股骨粗隆间骨折	肺诊断性影像检查的异常所见;四根以上肋骨骨折不伴第一肋骨骨折;老年性痴呆	好转	翁益民	翁益民	王特	股骨骨折闭合复位髓内针内固定术
1344	D07儿童骨科、骨盆外科	2024-04-20	2024-05-01	3498037	朱月英	女	64Y	股骨颈骨折	高血压;糖尿病;脑肿瘤切除史;癫痫;下肢动脉粥样硬化	治愈	孔建中	陈墨川	陈墨川	全髋关节置换;髋轴面，金属与聚乙烯;髋关节滑膜切除术
1345	D07儿童骨科、骨盆外科	2024-04-24	2024-05-02	3498217	赵鑫怡	女	11Y	肱骨髁上骨折	上臂正中神经损伤	治愈	张敬东	李玉安	朱瑞博	肱骨骨折切开复位钢针内固定术
1346	D07儿童骨科、骨盆外科	2024-04-25	2024-05-02	3498228	张子豪	男	6Y	桡骨颈骨折		治愈	张敬东	李玉安	朱瑞博	桡骨骨折切开复位钢针内固定术;关节软骨修复术
1347	D07儿童骨科、骨盆外科	2024-04-29	2024-05-02	3498234	金凯	男	15Y	取除骨折内固定装置		其他	张敬东	李玉安	毛诚晃	锁骨内固定装置去除术
1348	D07儿童骨科、骨盆外科	2024-04-29	2024-05-02	3498236	叶庚辛	男	7Y	肱骨外髁骨折		治愈	张敬东	易先宏	毛诚晃	肱骨骨折切开复位钢针内固定术;关节软骨修复术
1349	D07儿童骨科、骨盆外科	2024-04-28	2024-05-02	3498249	王欣睿	女	9Y	肱骨内上髁骨折		治愈	张敬东	李玉安	王伟	肱骨骨折切开复位钢针内固定术;关节软骨修复术
1350	D07儿童骨科、骨盆外科	2024-04-28	2024-05-03	3498391	王镇	男	15Y	胫骨近端骨折		治愈	张敬东	毛诚晃	王伟	胫骨骨折闭合复位内固定术
1351	D07儿童骨科、骨盆外科	2024-04-29	2024-05-03	3498416	谢凌锋	男	4Y	肱骨髁上骨折		好转	张敬东	毛诚晃	王伟	肱骨骨折闭合复位钢针内固定术
1352	D07儿童骨科、骨盆外科	2024-04-29	2024-05-04	3498575	谢睿禹	男	8Y	肱骨上端骨折		治愈	张敬东	李玉安	毛诚晃	肱骨骨折闭合复位髓内针内固定术
1353	D07儿童骨科、骨盆外科	2024-04-28	2024-05-04	3498580	冯子豪	男	2Y	股骨干骨折		治愈	张敬东	毛诚晃	朱瑞博	股骨骨折闭合复位髓内针内固定术
1354	D07儿童骨科、骨盆外科	2024-04-22	2024-05-04	3498581	程秀钗	女	84Y	股骨粗隆间骨折	胸腔积液;心功能不全;胆囊结石;胆囊息肉;肾盂积水，其他的	好转	翁益民	翁益民	王特	股骨骨折闭合复位髓内针内固定术
1355	D07儿童骨科、骨盆外科	2024-04-25	2024-05-04	3498582	陈丽丽	女	32Y	尺骨鹰嘴骨折	脂肪肝	好转	翁益民	翁益民	王特	尺骨骨折切开复位钢板内固定术
1356	D07儿童骨科、骨盆外科	2024-04-21	2024-05-04	3498650	王佳欣	女	13Y	尺骨桡骨闭合性骨折		治愈	张敬东	毛诚晃	王伟	尺骨骨折闭合复位髓内针内固定术;桡骨骨折闭合复位髓内针内固定术
1357	D07儿童骨科、骨盆外科	2024-04-27	2024-05-04	3498658	郑玉武	男	86Y	股骨粗隆间骨折	心房颤动;心功能不全;胸腔积液;胆囊结石;后天性肾囊肿;肺部感染	治愈	黄俊武	余贤斌	马亮亮	股骨骨折闭合复位髓内针内固定术
1358	D07儿童骨科、骨盆外科	2024-05-01	2024-05-04	3498682	蔡韩泽	男	10Y	趾伸肌腱断裂	开放性特指趾骨骨折	治愈	张敬东	毛诚晃	王伟	趾肌腱缝合术;皮肤和皮下坏死组织切除清创术;皮肤缝合术;趾骨骨折闭合复位钢针内固定术
1359	D07儿童骨科、骨盆外科	2024-04-29	2024-05-05	3498848	叶凡	男	12Y	尺骨鹰嘴骨折	窦性心动过速;完全性右束支传导阻滞	治愈	张敬东	李玉安	毛诚晃	尺骨骨折切开复位钢针内固定术
1360	D07儿童骨科、骨盆外科	2024-04-15	2024-05-05	3498853	陈月勇	男	65Y	跖骨骨折	高血压;脂肪肝;肺部阴影;前列腺增生	治愈	孔建中	陈墨川	陈墨川	跖骨骨折切开复位钢板内固定术;跖骨骨折闭合复位钢针内固定术
1361	D07儿童骨科、骨盆外科	2024-05-02	2024-05-05	3498920	陈嘉毅	男	6Y	肱骨髁上骨折		治愈	张敬东	易先宏	朱瑞博	肱骨骨折闭合复位髓内针内固定术
1362	D07儿童骨科、骨盆外科	2024-05-04	2024-05-07	3499403	曹彦妮	女	4Y	肱骨髁上骨折		治愈	张敬东	李玉安	毛诚晃	肱骨骨折闭合复位钢针内固定术
1363	D07儿童骨科、骨盆外科	2024-04-27	2024-05-08	3499492	华允朱	女	47Y	髌骨骨折	肾结石;乳房纤维囊性乳腺病;乳腺囊肿	好转	翁益民	翁益民	王特	髌骨骨折切开复位张力带钢丝内固定术
1364	D07儿童骨科、骨盆外科	2024-05-03	2024-05-08	3499495	江柏言	男	6Y	肱骨髁上骨折		治愈	张敬东	王伟	潘天龙	肱骨骨折闭合复位髓内针内固定术
1365	D07儿童骨科、骨盆外科	2024-05-02	2024-05-08	3499581	刘启航	男	3Y	胫腓骨下端骨折	足挫伤	治愈	张敬东	毛诚晃	朱瑞博	胫骨骨折闭合复位髓内针内固定术
1366	D07儿童骨科、骨盆外科	2024-04-22	2024-05-08	3499583	骆泽航	男	5Y	股骨骨折	肺挫伤;肝挫伤;腹腔积液;头皮血肿;口腔黏膜开放性损伤;多处开放性伤口	治愈	张敬东	李玉安	朱瑞博	股骨骨折切开复位髓内针内固定术
1367	D07儿童骨科、骨盆外科	2024-04-24	2024-05-08	3499584	虞昌桂	男	73Y	胫腓骨闭合性骨折	人工膝关节;双踝骨折;头部的损伤;枕骨骨折	治愈	张宇	陈成旺	童珉基	胫骨骨折闭合性复位术;胫骨外固定术
1368	D07儿童骨科、骨盆外科	2024-05-06	2024-05-08	3499585	章雨豪	男	3Y	取除骨折内固定装置		其他	张敬东	李玉安	朱瑞博	股骨内固定装置去除术
1369	D07儿童骨科、骨盆外科	2024-05-05	2024-05-09	3499892	沙澈	男	7Y	肱骨外髁骨折		好转	张敬东	张敬东	王伟	肱骨骨折切开复位钢针内固定术
1370	D07儿童骨科、骨盆外科	2024-05-04	2024-05-09	3499896	张智宸	男	11Y	鹰嘴骨折		好转	张敬东	朱瑞博	朱瑞博	尺骨骨折切开复位钢针内固定术
1371	D07儿童骨科、骨盆外科	2024-05-02	2024-05-09	3499900	梅韩宇	男	3Y	股骨骨折		治愈	张敬东	毛诚晃	朱瑞博	股骨骨折闭合复位髓内针内固定术
1372	D07儿童骨科、骨盆外科	2024-05-06	2024-05-09	3499913	林夏伊	女	5Y	肱骨髁上骨折		治愈	张敬东	王伟	潘天龙	肱骨骨折闭合复位钢针内固定术
1373	D07儿童骨科、骨盆外科	2024-05-06	2024-05-10	3500075	程悦琦	女	9Y	取除骨折内固定装置		其他	张敬东	李玉安	朱瑞博	股骨内固定装置去除术
1374	D07儿童骨科、骨盆外科	2024-04-23	2024-05-10	3500113	吴德云	男	72Y	Pilon骨折	踝关节半脱位;脂肪肝;后天性肾囊肿;前列腺增生;前列腺结石	治愈	孔建中	陈墨川	陈墨川	踝关节骨折切开复位钢板内固定术;关节软骨修复术;踝融合术;胫骨植骨术
1375	D07儿童骨科、骨盆外科	2024-05-07	2024-05-11	3500295	钱佳乐	女	4Y	肱骨髁上骨折		好转	张敬东	王伟	朱瑞博	肱骨骨折闭合复位钢针内固定术
1376	D07儿童骨科、骨盆外科	2024-04-27	2024-05-11	3500298	张其锋	男	44Y	髌骨骨折	第一掌骨骨折;高血压	好转	黄俊武	余贤斌	马亮亮	髌骨骨折切开复位张力带钢丝内固定术;关节软骨修复术;掌骨骨折切开复位钢板内固定术
1377	D07儿童骨科、骨盆外科	2024-05-04	2024-05-11	3500314	郑仕言	男	12Y	踝关节骨折		治愈	张敬东	李玉安	王伟	踝关节骨折切开复位钢针内固定术
1378	D07儿童骨科、骨盆外科	2024-05-06	2024-05-11	3500316	辜羽航	男	3Y	桡骨远端骨折		好转	张敬东	毛诚晃	朱瑞博	桡骨骨折闭合复位钢针内固定术
1379	D07儿童骨科、骨盆外科	2024-05-04	2024-05-11	3500318	高云叶	女	41Y	锁骨骨折	眶骨骨折;三根肋骨骨折不伴第一肋骨骨折;肺挫伤;创伤性湿肺	好转	黄俊武	余贤斌	马亮亮
1380	D07儿童骨科、骨盆外科	2024-04-20	2024-05-12	3500630	廖文卿	男	10Y	胫腓骨下端骨折	耻骨骨折;创伤性硬脑膜外出血;额骨骨折;额窦筛窦上颌窦炎;肺挫伤	治愈	张敬东	李玉安	潘天龙	腓骨骨折切开复位钢板内固定术;胫骨骨折闭合复位髓内针内固定术
1381	D07儿童骨科、骨盆外科	2024-05-09	2024-05-12	3500721	章洪铭	男	48Y	胫腓骨下端骨折		好转	黄俊武	余贤斌	马亮亮	胫骨骨折闭合复位髓内针内固定术;石膏绷带固定
1382	D07儿童骨科、骨盆外科	2024-05-07	2024-05-13	3500915	姚经匡	男	12Y	鹰嘴骨折	成骨不全	治愈	张敬东	王伟	潘天龙	尺骨骨折切开复位钢针内固定术;关节软骨修复术
1383	D07儿童骨科、骨盆外科	2024-04-27	2024-05-13	3500933	陈新武	男	36Y	股骨髁间骨折	跟骨骨折;胸椎骨折	好转	孔建中	陈墨川	陈墨川	股骨骨折切开复位钢板内固定术;关节软骨修复术;股骨植骨术;胸椎骨折切开复位内固定术;跟骨骨折切开复位钢板内固定术;关节软骨修复术;创面封闭式负压引流术（VSD);跟骨植骨术
1384	D07儿童骨科、骨盆外科	2024-05-08	2024-05-13	3500949	黄晓东	男	31Y	胫骨骨干骨折	外踝骨折	治愈	水小龙	水小龙	汪吉棋	胫骨骨折切开复位钢板内固定术;踝关节骨折切开复位钢板内固定术
1385	D07儿童骨科、骨盆外科	2024-05-06	2024-05-13	3500971	吴媛瑾	女	9Y	取除骨折内固定装置		其他	张敬东	毛诚晃	潘天龙	胫骨内固定装置去除术;胫骨外固定装置去除术;胫骨内固定术
1386	D07儿童骨科、骨盆外科	2024-05-04	2024-05-13	3500977	彭美仙	女	68Y	胫腓骨下端骨折		好转	黄俊武	余贤斌	马亮亮	胫骨骨折切开复位钢板内固定术;腓骨骨折闭合复位髓内针内固定术
1387	D07儿童骨科、骨盆外科	2024-05-10	2024-05-13	3500988	陈运政	男	4Y	肱骨髁上骨折		好转	张敬东	李玉安	朱瑞博	肱骨骨折闭合复位钢针内固定术
1388	D07儿童骨科、骨盆外科	2024-05-06	2024-05-13	3501027	吴宝台	男	24Y	取除骨折内固定装置		其他	翁益民	翁益民	王特	肱骨内固定装置去除术;胫骨内固定装置去除术
1389	D07儿童骨科、骨盆外科	2024-05-11	2024-05-14	3501221	王佳诚	男	2Y	鹰嘴骨折		好转	张敬东	李玉安	朱瑞博	尺骨骨折切开复位钢板内固定术;关节软骨修复术
1390	D07儿童骨科、骨盆外科	2024-05-12	2024-05-14	3501318	郭航维	男	5Y	肱骨髁上骨折		治愈	张敬东	毛诚晃	潘天龙	肱骨骨折闭合复位钢针内固定术
1391	D07儿童骨科、骨盆外科	2024-05-09	2024-05-14	3501352	廖俊逸	男	4Y	取除骨折内固定装置		其他	张敬东	李玉安	潘天龙	股骨内固定装置去除术
1392	D07儿童骨科、骨盆外科	2024-05-11	2024-05-14	3501381	林华琴	男	63Y	锁骨骨折		治愈	水小龙	水小龙	汪吉棋	锁骨骨折切开复位钢板内固定术
1393	D07儿童骨科、骨盆外科	2024-05-10	2024-05-15	3501597	陈莀	男	5Y	尺骨和桡骨下端均骨折		治愈	张敬东	李玉安	王伟	桡骨骨折闭合复位髓内针内固定术;尺骨骨折闭合复位髓内针内固定术
1394	D07儿童骨科、骨盆外科	2024-05-10	2024-05-15	3501621	章玺	男	13Y	胫骨结节骨折		治愈	张敬东	李玉安	潘天龙	胫骨骨折切开复位螺钉内固定术;髌韧带缝合术
1395	D07儿童骨科、骨盆外科	2024-05-09	2024-05-15	3501634	郭瑞博	男	6Y	股骨干骨折		治愈	张敬东	李玉安	朱瑞博	股骨骨折闭合复位髓内针内固定术
1396	D07儿童骨科、骨盆外科	2024-05-05	2024-05-15	3501637	陈多恩	女	3Y	股骨干骨折	额骨骨折;颞骨骨折;创伤性硬脑膜外出血;创伤性硬膜下出血;头皮血肿	治愈	张敬东	李玉安	朱瑞博	股骨骨折闭合复位钢针内固定术
1397	D07儿童骨科、骨盆外科	2024-05-08	2024-05-15	3501640	何也	男	14Y	胫骨远端骨折伴腓骨骨折	小腿神经损伤	治愈	张敬东	易先宏	潘天龙	腓骨骨折切开复位钢板内固定术;胫骨骨折闭合复位内固定术
1398	D07儿童骨科、骨盆外科	2024-05-01	2024-05-15	3501654	陈梅柳	女	69Y	股骨颈骨折	骨质增生;特发性肺纤维化;心脏术后;冠状动脉粥样硬化;主动脉钙化	治愈	洪建军	张秀孟	张秀孟	全髋关节置换;髋关节滑膜切除术;髋轴面，陶瓷与聚乙烯
1399	D07儿童骨科、骨盆外科	2024-05-11	2024-05-16	3501907	陆灏镧	男	5Y	尺骨和桡骨下端均骨折		治愈	张敬东	潘天龙	潘天龙	桡骨骨折闭合复位钢针内固定术
1400	D07儿童骨科、骨盆外科	2024-05-13	2024-05-17	3502132	严逸晨	女	8Y	肱骨髁上骨折		好转	张敬东	易先宏	潘天龙	肱骨骨折闭合复位钢针内固定术
1401	D07儿童骨科、骨盆外科	2024-05-13	2024-05-18	3502418	胡轩恺	男	8Y	尺骨桡骨闭合性骨折		治愈	张敬东	王伟	朱瑞博	尺骨骨折闭合复位髓内针内固定术;桡骨骨折闭合复位髓内针内固定术
1402	D07儿童骨科、骨盆外科	2024-04-29	2024-05-18	3502419	滕佳乐	男	18Y	尺骨和桡骨下端均骨折	创伤性硬脑膜外出血;创伤性硬膜下出血;眶骨骨折;上颌窦骨折;眼睑挫伤;筛窦上颌窦蝶窦炎;肝钙化灶	好转	翁益民	翁益民	王特	桡骨骨折闭合复位钢针内固定术;桡骨外固定术;掌腕关节固定术
1403	D07儿童骨科、骨盆外科	2024-05-07	2024-05-18	3502422	吴秀珠	女	84Y	股骨颈骨折	脑震荡;头皮血肿;多处挫伤;腰骶椎间盘突出;轻度贫血;冠状动脉支架植入后状态;上颌窦炎;陈旧性肺结核;后天性肾囊肿;心功能不全;下肢静脉血栓形成;胃部分后天性缺失	好转	翁益民	翁益民	王特	人工股骨头置换术
1404	D07儿童骨科、骨盆外科	2024-05-15	2024-05-18	3502429	刘学源	男	10Y	肱骨髁上骨折		治愈	张敬东	李玉安	潘天龙	肱骨骨折闭合复位钢针内固定术
1405	D07儿童骨科、骨盆外科	2024-05-13	2024-05-18	3502503	刘爱贞	女	81Y	股骨粗隆间骨折	股骨头缺血性坏死;多发性肝囊肿;后天性肾囊肿	好转	翁益民	翁益民	王特
1406	D07儿童骨科、骨盆外科	2024-05-14	2024-05-19	3502762	周钰瑾	女	1Y	肱骨外髁骨折		治愈	张敬东	王伟	潘天龙	肱骨骨折切开复位钢针内固定术;关节软骨修复术
1407	D07儿童骨科、骨盆外科	2024-05-06	2024-05-19	3502765	陈阿奶	女	85Y	腰椎骨折L1	胫腓骨下端骨折;脊椎前移;肝囊肿;后天性肾囊肿;具有心脏和血管植入物和移植物	治愈	周一飞	郑亦静	郑亦静	腰椎骨折球囊扩张成形术;胫骨骨折切开复位钢板内固定术;腓骨骨折切开复位钢板内固定术;皮肤和皮下坏死组织切除清创术
1408	D07儿童骨科、骨盆外科	2024-04-25	2024-05-19	3502769	陈小棉	女	54Y	肱骨髁间骨折	前臂尺神经损伤;人类免疫缺陷病毒\[HIV\]病;梅毒;肝囊肿	好转	孔建中	陈墨川	陈墨川	肱骨骨折切开复位钢板内固定术;尺骨骨折切开复位钢板内固定术
1409	D07儿童骨科、骨盆外科	2024-05-17	2024-05-20	3503064	黄楚怡	女	8Y	肱骨髁上骨折		治愈	张敬东	易先宏	潘天龙	肱骨骨折闭合复位钢针内固定术
1410	D07儿童骨科、骨盆外科	2024-05-15	2024-05-20	3503113	李洋	女	14Y	肱骨干骨折		治愈	张敬东	易先宏	潘天龙	肱骨骨折闭合复位髓内针内固定术
1411	D07儿童骨科、骨盆外科	2024-05-10	2024-05-20	3503163	张云芬	女	77Y	髂骨骨折	骶骨骨折;耻骨骨折;后天性肾囊肿;颈动脉硬化;骨质疏松;胸椎术后	好转	孔建中	陈墨川	陈墨川	骨盆骨折闭合复位内固定术
1412	D07儿童骨科、骨盆外科	2024-05-12	2024-05-21	3503441	丁梓涵	女	3Y	股骨下端骨折		治愈	张敬东	潘天龙	朱瑞博	股骨骨折闭合复位钢针内固定术
1413	D07儿童骨科、骨盆外科	2024-05-10	2024-05-21	3503442	王仕成	男	33Y	胫骨干骨折伴腓骨骨折	前列腺结石	治愈	孔建中	陈墨川	陈墨川	胫骨骨折闭合复位髓内针内固定术;腓骨骨折闭合复位髓内针内固定术
1414	D07儿童骨科、骨盆外科	2024-05-15	2024-05-21	3503472	石嘉雯	女	2Y	取除骨折内固定装置		其他	张敬东	易先宏	朱瑞博	股骨内固定装置去除术
1415	D07儿童骨科、骨盆外科	2024-05-17	2024-05-21	3503473	李宏锐	男	7Y	取除骨折内固定装置		其他	张敬东	张敬东	潘天龙	尺骨内固定装置去除术
1416	D07儿童骨科、骨盆外科	2024-05-19	2024-05-21	3503474	李昕诺	女	4Y	肱骨髁上骨折		治愈	张敬东	李玉安	朱瑞博	肱骨骨折切开复位钢针内固定术
1417	D07儿童骨科、骨盆外科	2024-05-18	2024-05-22	3503740	蒋晋南	男	12Y	取除骨折内固定装置	先天性下肢畸形	其他	张敬东	易先宏	潘天龙	锁骨内固定装置去除术
1418	D07儿童骨科、骨盆外科	2024-05-13	2024-05-22	3503786	陈松仇	女	88Y	股骨粗隆间骨折	肺占位性病变;胸腔积液;主动脉钙化	好转	孔建中	陈墨川	陈墨川	股骨骨折切开复位钢板内固定术
1419	D07儿童骨科、骨盆外科	2024-05-20	2024-05-22	3504016	池菊娇	女	78Y	骨折延迟愈合	骨折内固定装置障碍;膝关节退行性病变;膝关节积液;糖尿病	未愈	孔建中	陈墨川	陈墨川
1420	D07儿童骨科、骨盆外科	2024-05-19	2024-05-23	3504186	麻炜浩	男	5Y	肱骨骨囊肿	病理性骨折，不可归类在他处者	治愈	张敬东	张敬东	朱瑞博	肱骨病损切除术;肱骨骨折闭合复位钢针内固定术
1421	D07儿童骨科、骨盆外科	2024-05-13	2024-05-24	3504437	戴春兰	女	68Y	髂骨骨折	陈旧性肋骨骨折;脂肪肝	好转	翁益民	翁益民	王特	髂骨骨折切开复位钢板内固定术
1422	D07儿童骨科、骨盆外科	2024-05-13	2024-05-24	3504441	周梦涵	女	3Y	胫腓骨下端骨折	跖骨骨折	好转	翁益民	翁益民	王特	胫骨骨折闭合复位内固定术
1423	D07儿童骨科、骨盆外科	2024-05-18	2024-05-25	3504615	朱力波	男	10Y	肱骨髁上骨折	上臂桡神经损伤;上臂尺神经损伤;上臂正中神经损伤	治愈	张敬东	王伟	朱瑞博	肱骨骨折闭合复位钢针内固定术;皮肤和皮下坏死组织切除清创术
1424	D07儿童骨科、骨盆外科	2024-05-17	2024-05-25	3504644	邓红玲	女	68Y	胫骨平台伴腓骨骨折	支气管扩张伴感染;膝关节积血;陈旧性肺结核;肝囊肿	好转	翁益民	翁益民	王特	胫骨骨折切开复位钢板内固定术;胫骨植骨术
1425	D07儿童骨科、骨盆外科	2024-05-23	2024-05-25	3504647	赵望宇	男	2Y	肱骨近端骨折		治愈	张敬东	易先宏	潘天龙	肱骨骨折闭合复位髓内针内固定术
1426	D07儿童骨科、骨盆外科	2024-05-20	2024-05-26	3504927	李徐槿	女	3Y	股骨干骨折		治愈	张敬东	朱瑞博	潘天龙	股骨骨折闭合复位髓内针内固定术
1427	D07儿童骨科、骨盆外科	2024-05-20	2024-05-26	3504935	钱凯轩	男	7Y	尺骨桡骨闭合性骨折		治愈	张敬东	李玉安	潘天龙	桡骨骨折切开复位髓内针内固定术;尺骨骨折闭合复位髓内针内固定术
1428	D07儿童骨科、骨盆外科	2024-05-20	2024-05-26	3504938	陈昱锦	男	3Y	肱骨外髁骨折		治愈	张敬东	李玉安	潘天龙	肱骨骨折切开复位钢针内固定术;关节软骨修复术
1429	D07儿童骨科、骨盆外科	2024-05-03	2024-05-26	3505053	周鑫磊	男	8Y	肱骨骨髓炎	病理性骨折，不可归类在他处者	好转	张敬东	易先宏	朱瑞博	肱骨病损切除术;创面封闭式负压引流术（VSD);石膏绷带固定;创面封闭式负压引流术（VSD);皮肤和皮下组织非切除性清创;皮肤和皮下组织非切除性清创;皮肤缝合术
1430	D07儿童骨科、骨盆外科	2024-05-19	2024-05-26	3505054	胡冰	女	4Y	肱骨髁上骨折		好转	张敬东	李玉安	朱瑞博	肱骨骨折闭合复位钢针内固定术
1431	D07儿童骨科、骨盆外科	2024-05-22	2024-05-27	3505249	姜荣国	男	7Y	开放性距骨骨折	开放性胫骨下端骨折	好转	张敬东	毛诚晃	潘天龙
1432	D07儿童骨科、骨盆外科	2024-05-24	2024-05-27	3505326	汪晨曦	男	4Y	肱骨髁上骨折		好转	张敬东	易先宏	潘天龙	肱骨骨折闭合复位钢针内固定术
1433	D07儿童骨科、骨盆外科	2024-04-22	2024-05-27	3505328	张国俊	男	54Y	在大腿水平的后部肌群和肌腱损伤	大腿撕脱伤;开放性股骨粗隆下骨折;多处挫伤;胸椎压缩性骨折;多发性腰椎骨折;腰椎椎管狭窄;创伤性气胸;创伤性胸腔积液;胸腰椎椎间盘突出;腹膜后血肿;神经源性膀胱;颈椎病;前列腺囊肿;下肢静脉血栓形成	治愈	翁益民	翁益民	王特	下肢肌肉缝合术;皮肤和皮下坏死组织切除清创术;创面封闭式负压引流术（VSD);肌腱、血管、神经探查术;皮肤缝合术;下腔静脉滤器置入术;股骨骨折闭合复位髓内针内固定术;腰椎骨折切开复位内固定术
1434	D07儿童骨科、骨盆外科	2024-05-23	2024-05-27	3505329	唐子扬	男	4Y	肱骨髁上骨折		治愈	张敬东	朱瑞博	潘天龙	肱骨骨折闭合复位钢针内固定术
1435	D07儿童骨科、骨盆外科	2024-05-25	2024-05-27	3505332	南政序	男	9Y	肱骨髁上骨折		治愈	张敬东	毛诚晃	潘天龙	肱骨骨折闭合复位钢针内固定术
1436	D07儿童骨科、骨盆外科	2024-05-25	2024-05-27	3505334	谢尚局	男	35Y	尺骨近端多发性骨折	脂肪肝	好转	翁益民	翁益民	王特
1437	D07儿童骨科、骨盆外科	2024-05-23	2024-05-27	3505410	唐闻雨	女	3Y	取除骨折内固定装置		其他	张敬东	张敬东	潘天龙	股骨内固定装置去除术
1438	D07儿童骨科、骨盆外科	2024-05-23	2024-05-27	3505411	黄乐怡	女	6Y	取除骨折内固定装置		其他	张敬东	王伟	潘天龙	桡骨内固定装置去除术
1439	D07儿童骨科、骨盆外科	2024-05-13	2024-05-27	3505478	徐妙菊	女	60Y	开放性跖骨骨折	跗跖关节脱位;开放性足损伤;锁骨骨折;四根以上肋骨骨折不伴第一肋骨骨折;枕骨骨折;头皮血肿;脑挫伤;创伤性硬膜下出血;上颌窦炎;后天性肾囊肿;冠状动脉粥样硬化;腔隙性脑梗死	好转	孔建中	陈墨川	陈墨川	跖骨骨折切开复位钢针内固定术;跖跗关节脱位切开复位术;跖骨外固定术;皮肤和皮下坏死组织切除清创术;关节软骨修复术;锁骨骨折切开复位钢板内固定术;锁骨植骨术
1440	D07儿童骨科、骨盆外科	2024-05-23	2024-05-28	3505628	张悦如	女	11Y	桡骨颈骨折	尺骨近端骨折	治愈	张敬东	易先宏	朱瑞博	桡骨骨折闭合复位髓内针内固定术;尺骨骨折闭合复位髓内针内固定术
1441	D07儿童骨科、骨盆外科	2024-05-23	2024-05-28	3505648	王麒杰	男	6Y	肱骨髁上骨折	肩和上臂神经损伤	好转	张敬东	王伟	朱瑞博	肱骨骨折闭合复位钢针内固定术
1442	D07儿童骨科、骨盆外科	2024-05-17	2024-05-29	3505851	章玉香	女	89Y	股骨颈骨折	低钾血症;老年性心脏病;心房颤动;肝囊肿;下肢动脉粥样硬化	好转	翁益民	翁益民	王特	人工股骨头置换术
1443	D07儿童骨科、骨盆外科	2024-05-23	2024-05-29	3505894	谢浩东	男	9Y	肱骨外髁骨折		治愈	张敬东	易先宏	朱瑞博	关节软骨修复术;肱骨骨折切开复位钢针内固定术
1444	D07儿童骨科、骨盆外科	2024-05-17	2024-05-29	3505928	刘雅芹	女	9Y	股骨下端骨折		治愈	张敬东	易先宏	朱瑞博	股骨骨折切开复位钢板内固定术
1445	D07儿童骨科、骨盆外科	2024-05-27	2024-05-30	3506304	张博文	男	8Y	肱骨髁上骨折		治愈	张敬东	易先宏	潘天龙	肱骨骨折闭合复位钢针内固定术
1446	D07儿童骨科、骨盆外科	2024-05-27	2024-05-30	3506328	徐日烁	男	6Y	肱骨髁上骨折		治愈	张敬东	毛诚晃	潘天龙	肱骨骨折闭合复位钢针内固定术
1447	D07儿童骨科、骨盆外科	2024-05-25	2024-05-30	3506330	方正楠	男	7Y	肱骨外髁骨折	鹰嘴骨折	治愈	张敬东	张敬东	潘天龙	肱骨骨折切开复位钢针内固定术;关节软骨修复术
1448	D07儿童骨科、骨盆外科	2024-05-23	2024-05-30	3506344	张萁	女	4Y	肱骨外髁骨折		治愈	张敬东	易先宏	潘天龙	肱骨骨折切开复位钢针内固定术;关节软骨修复术
1449	D07儿童骨科、骨盆外科	2024-05-25	2024-05-30	3506350	谷其航	男	13Y	肱骨内上髁骨折	肘关节脱位	治愈	张敬东	李玉安	潘天龙	肱骨骨折切开复位钢针内固定术
1450	D07儿童骨科、骨盆外科	2024-05-26	2024-05-30	3506351	陈旭聪	男	10Y	股骨颈骨折		治愈	张敬东	王伟	潘天龙	股骨骨折闭合复位钢针内固定术
1451	D07儿童骨科、骨盆外科	2024-05-20	2024-05-30	3506377	周美兰	女	53Y	股骨颈骨折		好转	孔建中	陈墨川	陈墨川	股骨骨折闭合复位螺钉内固定术
1452	D07儿童骨科、骨盆外科	2024-05-10	2024-05-30	3506448	陈秀芬	女	66Y	骨折不连接\[假关节\]	肾错构瘤;肺诊断性影像检查的异常所见	好转	孔建中	陈墨川	陈墨川	胫骨骨折切开复位钢板内固定术;胫骨内固定装置去除术;髂骨切除术用作移植物;胫骨植骨术;皮肤和皮下坏死组织切除清创术
1453	D07儿童骨科、骨盆外科	2024-05-22	2024-05-30	3506451	李秀珍	女	56Y	肱骨近端骨折	高血压;局限性神经性皮炎;肝囊肿	好转	孔建中	陈墨川	陈墨川	肱骨骨折切开复位钢板内固定术;关节软骨修复术;肱骨植骨术
1454	D07儿童骨科、骨盆外科	2024-05-26	2024-05-31	3506489	翁毓佳	女	8Y	尺骨骨折	桡骨骨折	治愈	张敬东	王伟	潘天龙	尺骨骨折切开复位髓内针内固定术;桡骨骨折切开复位髓内针内固定术
1455	D07儿童骨科、骨盆外科	2024-05-27	2024-05-31	3506496	蔡文克	男	36Y	取除骨折内固定装置	肝囊肿	其他	翁益民	翁益民	王特	锁骨内固定装置去除术
1456	D07儿童骨科、骨盆外科	2024-05-18	2024-05-31	3506503	应秀珍	女	80Y	三踝骨折	踝关节半脱位;高血压;2型糖尿病;脂肪肝;肝囊肿;后天性肾囊肿;乳房后天性缺失	好转	翁益民	翁益民	王特	踝关节骨折切开复位钢板内固定术
1457	D07儿童骨科、骨盆外科	2024-05-25	2024-06-01	3506843	杨永恒	男	10Y	尺骨和桡骨下端均骨折	皮肤裂伤	治愈	张敬东	李玉安	潘天龙	桡骨骨折切开复位钢板内固定术;尺骨骨折闭合复位髓内针内固定术
1458	D07儿童骨科、骨盆外科	2024-05-27	2024-06-01	3506851	吴畅毅	男	7Y	尺骨和桡骨下端均骨折		治愈	张敬东	毛诚晃	潘天龙	桡骨骨折切开复位钢板内固定术;尺骨骨折闭合复位髓内针内固定术
1459	D07儿童骨科、骨盆外科	2024-05-29	2024-06-02	3506993	尹婧怡	女	1Y	肱骨髁上骨折		治愈	张敬东	朱瑞博	潘天龙	肱骨骨折切开复位钢针内固定术
1460	D07儿童骨科、骨盆外科	2024-05-28	2024-06-02	3506998	刘雄利	男	17Y	锁骨骨折		好转	翁益民	翁益民	蔡乐益	锁骨骨折切开复位钢板内固定术;锁骨植骨术
1461	D07儿童骨科、骨盆外科	2024-05-25	2024-06-02	3507052	陈玉花	女	62Y	肱骨近端骨折	肝回声不均;退行性主动脉瓣疾患;二尖瓣及主动脉瓣关闭不全	好转	翁益民	翁益民	蔡乐益	肱骨骨折切开复位钢板内固定术;肩袖修补术;肱骨植骨术
1462	D07儿童骨科、骨盆外科	2024-05-24	2024-06-02	3507122	刘鹏	男	34Y	外踝骨折	骨软骨病，其他特指的;冈上肌肌腱损伤;肩关节积液;颈椎间盘突出;喙肱韧带扭伤	好转	翁益民	翁益民	蔡乐益	踝关节骨折切开复位钢板内固定术;其他骨移植术
1463	D07儿童骨科、骨盆外科	2024-05-27	2024-06-02	3507133	邓成群	男	36Y	取除骨折内固定装置	脂肪肝;前列腺增生;前列腺结石	其他	翁益民	翁益民	蔡乐益	肱骨内固定装置去除术
1464	D07儿童骨科、骨盆外科	2024-05-08	2024-06-02	3507135	陈静	女	38Y	锁骨骨折	肋骨多处骨折;肺挫伤;创伤性胸腔积液;创伤性气胸;胸部挫伤;脑震荡;头皮血肿;多处挫伤;颈椎间盘突出	好转	翁益民	翁益民	蔡乐益	锁骨骨折切开复位钢板内固定术;锁骨植骨术
1465	D07儿童骨科、骨盆外科	2024-05-26	2024-06-03	3507442	杨博	男	3Y	股骨干骨折		治愈	张敬东	闫广奎	潘天龙	股骨骨折闭合复位髓内针内固定术
1466	D07儿童骨科、骨盆外科	2024-05-29	2024-06-03	3507445	窦辰雨	男	7Y	尺骨和桡骨骨干均骨折		治愈	张敬东	李玉安	潘天龙	桡骨骨折闭合复位髓内针内固定术;尺骨骨折闭合复位髓内针内固定术
1467	D07儿童骨科、骨盆外科	2024-05-20	2024-06-03	3507448	黄湘奶	女	78Y	股骨颈骨折	高血压;糖尿病;颈动脉硬化;脂肪肝;肩撞击综合征;肩关节关节病;肩周炎	治愈	孔建中	陈墨川	陈墨川	全髋关节置换;髋轴面，金属与聚乙烯;髋关节滑膜切除术
1468	D07儿童骨科、骨盆外科	2024-05-12	2024-06-03	3507451	吴则华	男	63Y	胫骨骨髓炎	骨折术后;高血压;2型糖尿病;房性期前收缩[房性早搏];脂肪肝;前列腺结石;肺部阴影	好转	孔建中	陈墨川	陈墨川	胫骨病损切除术;皮肤和皮下坏死组织切除清创术;胫骨内固定术;骨空隙填补物置入;创面封闭式负压引流术（VSD)
1469	D07儿童骨科、骨盆外科	2024-05-30	2024-06-04	3507764	李图腾	男	1Y	肱骨外髁骨折		治愈	张敬东	闫广奎	潘天龙	肱骨骨折切开复位钢针内固定术;关节软骨修复术
1470	D07儿童骨科、骨盆外科	2024-05-27	2024-06-04	3507767	党若溪	女	2Y	趾骨骨折		治愈	张敬东	李玉安	吴宗艺	趾骨骨折闭合复位钢针内固定术
1471	D07儿童骨科、骨盆外科	2024-05-30	2024-06-04	3507773	马云飞	男	10Y	肱骨外髁骨折		治愈	张敬东	闫广奎	潘天龙	肱骨骨折切开复位钢针内固定术
1472	D07儿童骨科、骨盆外科	2024-05-30	2024-06-04	3507787	程建华	女	60Y	髌骨骨折	股四头肌和肌腱损伤;甲状腺功能减退症;后天性肾囊肿;肾结石	好转	孔建中	陈墨川	陈墨川	髌骨骨折切开复位张力带钢丝内固定术;关节软骨修复术;股四头肌缝合术
1473	D07儿童骨科、骨盆外科	2024-05-30	2024-06-04	3507790	冷嘉诚	男	11Y	桡骨颈骨折		治愈	张敬东	李玉安	潘天龙	桡骨骨折闭合复位髓内针内固定术
1474	D07儿童骨科、骨盆外科	2024-05-24	2024-06-05	3508052	夏金弟	女	85Y	开放性胫腓骨下端骨折	开放性足损伤;跟骨骨折;高血压;睡眠障碍;骨折术后	好转	翁益民	翁益民	蔡乐益	腓骨骨折切开复位钢板内固定术;关节软骨修复术;皮肤和皮下坏死组织切除清创术;骨碎片去除术;皮肤缝合术
1475	D07儿童骨科、骨盆外科	2024-05-31	2024-06-05	3508131	傅景轩	男	7Y	尺骨和桡骨下端均骨折		治愈	张敬东	李玉安	潘天龙	桡骨骨折闭合复位钢针内固定术;尺骨骨折闭合复位髓内针内固定术
1476	D07儿童骨科、骨盆外科	2024-05-30	2024-06-05	3508199	陈诗琳	女	5Y	肱骨髁上骨折		治愈	张敬东	易先宏	潘天龙	肱骨骨折闭合复位钢针内固定术
1477	D07儿童骨科、骨盆外科	2024-05-31	2024-06-05	3508339	张议方	女	44Y	开放性足损伤	胫骨远端骨折;肺部阴影;肝囊肿;子宫术后	治愈	陈龙	应晓洲	应晓洲	皮肤和皮下坏死组织切除清创术;创面封闭式负压引流术（VSD);皮肤缝合术
1478	D07儿童骨科、骨盆外科	2024-05-28	2024-06-05	3508361	曾思恒	男	13Y	桡尺骨骨干骨折		治愈	孙辽军	孙辽军	翁摄稷	桡骨骨折切开复位钢板内固定术;尺骨骨折切开复位钢板内固定术;尺骨植骨术
1479	D07儿童骨科、骨盆外科	2024-06-01	2024-06-06	3508406	王亦轩	男	5Y	肱骨髁上骨折		治愈	张敬东	王伟	潘天龙	肱骨骨折闭合复位钢针内固定术
1480	D07儿童骨科、骨盆外科	2024-06-01	2024-06-06	3508420	卢孙秉政	男	4Y	取除骨折内固定装置		其他	张敬东	张敬东	潘天龙	股骨内固定装置去除术
1481	D07儿童骨科、骨盆外科	2024-06-04	2024-06-07	3508687	李瑾涵	女	8Y	取除骨折内固定装置		其他	张敬东	闫广奎	潘天龙	桡骨内固定装置去除术
1482	D07儿童骨科、骨盆外科	2024-06-02	2024-06-08	3508850	施勇杰	男	52Y	颈椎骨折	脑挫伤;创伤性蛛网膜下腔出血;创伤性硬膜下出血;颈部挫伤;颈椎间盘突出;颈椎退行性病变;腰骶椎间盘突出;腰椎退行性病变;脂肪肝;肾挛缩;后天性肾囊肿;胆囊结石;前列腺钙化灶;高血压;肾钙化;胸椎间盘突出	好转	翁益民	翁益民	蔡乐益
1483	D07儿童骨科、骨盆外科	2024-05-31	2024-06-08	3508988	付梦	女	12Y	股骨髁上骨折		治愈	张敬东	李玉安	潘天龙	股骨骨折闭合复位钢针内固定术
1484	D07儿童骨科、骨盆外科	2024-06-01	2024-06-08	3509007	周冉	女	3Y	肱骨外髁骨折		治愈	张敬东	李玉安	潘天龙	肱骨骨折切开复位钢针内固定术
1485	D07儿童骨科、骨盆外科	2024-06-02	2024-06-09	3509304	王习	男	2Y	肱骨外髁骨折		治愈	张敬东	李玉安	潘天龙	肱骨骨折切开复位钢针内固定术
1486	D07儿童骨科、骨盆外科	2024-05-30	2024-06-09	3509385	吴万倾	男	40Y	尺骨和桡骨下端均骨折	前臂开放性伤口	好转	孔建中	陈墨川	陈墨川	尺骨骨折切开复位钢板内固定术;桡骨骨折切开复位钢板内固定术;桡骨植骨术
1487	D07儿童骨科、骨盆外科	2024-05-30	2024-06-09	3509386	李宗员	男	47Y	锁骨骨折	尺骨鹰嘴骨折;创伤性湿肺;胸腔积液;肾结石;前列腺增生;肝回声不均;前列腺结石	好转	孔建中	陈墨川	陈墨川	锁骨骨折切开复位钢板内固定术;尺骨骨折闭合复位钢针内固定术;锁骨植骨术
1488	D07儿童骨科、骨盆外科	2024-05-29	2024-06-09	3509388	张陈奎	男	70Y	股骨颈骨折	下肢动脉粥样硬化;下肢静脉血栓形成;肾结石;前列腺增生;前列腺结石;肺部阴影;胸主动脉粥样硬化;冠状动脉粥样硬化;主动脉瓣钙化;胃部分后天性缺失	好转	孔建中	陈墨川	陈墨川	全髋关节置换;髋关节滑膜切除术;髋轴面，金属与聚乙烯
1489	D07儿童骨科、骨盆外科	2024-06-03	2024-06-10	3509677	郑而芬	女	45Y	取除骨折内固定装置		其他	翁益民	翁益民	蔡乐益	踝关节内固定装置去除术
1490	D07儿童骨科、骨盆外科	2024-06-06	2024-06-10	3509696	牟杨文杰	男	11Y	取除骨折内固定装置		其他	张敬东	闫广奎	潘天龙	桡骨内固定装置去除术
1491	D07儿童骨科、骨盆外科	2024-06-02	2024-06-10	3509703	曹念念	女	24Y	取除骨折内固定装置	胆囊息肉;后天性肾囊肿	其他	翁益民	翁益民	蔡乐益	跖骨内固定装置去除术
1492	D07儿童骨科、骨盆外科	2024-05-29	2024-06-10	3509755	郑成忠	男	53Y	跟骨骨折	甲状腺结节;胆囊息肉;脂肪肝	好转	翁益民	翁益民	蔡乐益	跟骨骨折切开复位钢板内固定术;跟骨植骨术;关节软骨修复术
1493	D07儿童骨科、骨盆外科	2024-06-05	2024-06-11	3509966	赵冬翠	女	74Y	桡骨远端骨折	肺部感染;退行性主动脉瓣疾患;二尖瓣及主动脉瓣关闭不全;后天性肾囊肿;心功能不全	好转	冯永增	冯永增	王贤亮	桡骨骨折切开复位钢板内固定术;桡骨植骨术
1494	D07儿童骨科、骨盆外科	2024-06-05	2024-06-12	3510293	高元钱	男	56Y	肱骨干骨折	后天性肾囊肿	好转	冯永增	冯永增	王贤亮	肱骨植骨术;肱骨骨折切开复位钢板内固定术
1495	D07儿童骨科、骨盆外科	2024-06-09	2024-06-12	3510296	张士美	男	5Y	取除骨折内固定装置		其他	张敬东	李玉安	潘天龙	股骨内固定装置去除术
1496	D07儿童骨科、骨盆外科	2024-06-08	2024-06-12	3510513	陈成梁	男	5Y	桡骨远端骨折		治愈	张敬东	闫广奎	潘天龙	桡骨骨折闭合复位钢针内固定术
1497	D07儿童骨科、骨盆外科	2024-06-09	2024-06-12	3510517	邱紫如	女	12Y	肱骨近端骨折		治愈	张敬东	李玉安	潘天龙	肱骨骨折闭合复位髓内针内固定术
1498	D07儿童骨科、骨盆外科	2024-06-09	2024-06-12	3510535	范溢晨	男	8Y	取除骨折内固定装置		其他	张敬东	李玉安	潘天龙	桡骨内固定装置去除术
1499	D07儿童骨科、骨盆外科	2024-06-10	2024-06-13	3510753	高滢心	女	2Y	肱骨髁上骨折		好转	张敬东	闫广奎	潘天龙	肱骨骨折闭合复位钢针内固定术
1500	D07儿童骨科、骨盆外科	2024-06-03	2024-06-13	3510816	刘长青	男	56Y	股骨粗隆间骨折	股骨头缺血性坏死;髋关节退行性病变;肺部感染;肺部阴影;肾结石;特发性肺纤维化	治愈	赵友明	赵友明	柯陈荣	股骨骨折闭合复位髓内针内固定术
1501	D07儿童骨科、骨盆外科	2024-05-29	2024-06-13	3510822	陈豪	男	5Y	股骨干骨折	肱骨上端骨折;腓骨骨折;腓总神经损伤;耻骨骨折;骶骨骨折;脑挫伤;创伤性硬脑膜外出血;创伤性蛛网膜下腔出血;急性失血性贫血;开放性会阴损伤;先天性耳聋	好转	张敬东	闫广奎	潘天龙	股骨骨折切开复位髓内针内固定术;肱骨骨折闭合复位髓内针内固定术
1502	D07儿童骨科、骨盆外科	2024-06-02	2024-06-15	3511301	王可操	男	76Y	胫骨平台伴腓骨骨折	糖尿病;脑卒中后遗症;肾功能不全;胆囊结石;后天性肾囊肿;前列腺增生;贫血;低钾血症;胆汁淤积症;前列腺结石	好转	翁益民	翁益民	蔡乐益	胫骨骨折切开复位钢板内固定术;胫骨植骨术;关节软骨修复术
1503	D07儿童骨科、骨盆外科	2024-06-05	2024-06-15	3511308	郑元坤	男	80Y	股骨颈骨折	肱骨近端骨折;陈旧性肋骨骨折;高血压;2型糖尿病;抑郁状态;肺气肿;肝囊肿;后天性肾囊肿	好转	冯永增	冯永增	王贤亮	髋轴面，金属与聚乙烯;人工股骨头置换术;肱骨骨折切开复位钢板内固定术;关节软骨修复术;肱骨植骨术
1504	D07儿童骨科、骨盆外科	2024-06-12	2024-06-15	3511310	王仕博	男	10Y	取除骨折内固定装置		其他	张敬东	李玉安	潘天龙	肱骨内固定装置去除术;皮肤瘢痕切除术
1505	D07儿童骨科、骨盆外科	2024-06-10	2024-06-15	3511313	陈祉硕	男	5Y	肱骨髁上骨折		治愈	张敬东	闫广奎	潘天龙	肱骨骨折切开复位钢针内固定术
1506	D07儿童骨科、骨盆外科	2024-06-08	2024-06-15	3511314	曾靖棋	男	7Y	桡尺骨骨干骨折		治愈	张敬东	李玉安	潘天龙	尺骨骨折切开复位髓内针内固定术;桡骨骨折闭合复位髓内针内固定术
1507	D07儿童骨科、骨盆外科	2024-06-12	2024-06-15	3511316	陈果	男	8Y	肱骨髁上骨折		治愈	张敬东	李玉安	潘天龙	肱骨骨折闭合复位钢针内固定术
1508	D07儿童骨科、骨盆外科	2024-06-11	2024-06-15	3511318	陈明启	男	10Y	肱骨髁上骨折		治愈	张敬东	李玉安	潘天龙	肱骨骨折闭合复位钢针内固定术
1509	D07儿童骨科、骨盆外科	2024-06-05	2024-06-16	3511682	林志新	男	38Y	股骨粗隆间骨折		好转	翁益民	翁益民	蔡乐益	股骨骨折闭合复位髓内针内固定术
1510	D07儿童骨科、骨盆外科	2024-06-09	2024-06-16	3511701	夏蕾	女	4Y	肱骨外髁骨折		治愈	张敬东	张敬东	潘天龙	肱骨骨折切开复位钢针内固定术;关节软骨修复术
1511	D07儿童骨科、骨盆外科	2024-06-08	2024-06-16	3511708	黄志鸿	男	14Y	骨盆骨折		治愈	张敬东	王伟	潘天龙	骨盆骨折切开复位螺钉内固定术
1512	D07儿童骨科、骨盆外科	2024-06-05	2024-06-16	3511744	吕爱香	女	66Y	髌骨骨折	股四头肌肌肉损伤;糖尿病;二尖瓣反流;肝回声不均;胆囊息肉;肾错构瘤	好转	翁益民	翁益民	蔡乐益	髌骨骨折切开复位张力带钢丝内固定术;关节软骨修复术;股四头肌缝合术
1513	D07儿童骨科、骨盆外科	2024-05-30	2024-06-16	3511782	施铭哲	男	7Y	骨折不连接\[假关节\]	骨折术后	好转	张敬东	李玉安	潘天龙	胫骨死骨去除术;髂骨切除术用作移植物;胫骨植骨术;胫骨内固定术;髌骨内固定装置去除术;皮肤瘢痕切除术
1514	D07儿童骨科、骨盆外科	2024-06-01	2024-06-17	3512027	史志杰	男	26Y	髋臼骨折	脂肪肝;胆囊胆固醇沉着症	好转	孔建中	陈墨川	陈墨川	骨盆骨折切开复位钢板内固定术;关节软骨修复术
1515	D07儿童骨科、骨盆外科	2024-06-10	2024-06-17	3512031	周夏玉	女	76Y	股骨颈骨折	高血压;糖尿病;脂肪肝;心功能不全;心房肥大;退行性主动脉瓣疾患;二尖瓣及主动脉瓣关闭不全;肾盂扩张;下肢静脉血栓形成	好转	翁益民	翁益民	蔡乐益	人工股骨头置换术;股骨植骨术;髋轴面，金属与聚乙烯
1516	D07儿童骨科、骨盆外科	2024-06-14	2024-06-17	3512033	云少轩	男	7Y	取除骨折内固定装置		其他	张敬东	闫广奎	潘天龙	股骨内固定装置去除术
1517	D07儿童骨科、骨盆外科	2024-06-10	2024-06-17	3512036	邹瑶	女	1Y	股骨干骨折	髂骨骨折;头皮血肿;清创术后	治愈	张敬东	李玉安	潘天龙	股骨骨折闭合性复位术不伴内固定;石膏绷带固定
1518	D07儿童骨科、骨盆外科	2024-04-12	2024-06-17	3512042	陈乐阳	男	12Y	创伤性肾破裂	肾蒂损伤;肾上腺损伤;腹膜后血肿;肝撕裂伤;肺挫伤;耻骨骨折;开放性胫腓骨下端骨折;骶骨骨折;创伤性胸腔积液;骶尾部挫伤	好转	张敬东	李玉安	朱瑞博	单侧肾切除术;肝破裂修补术;肾上腺修补术;腹腔冲洗检查;腹膜后血肿清除术;腓骨骨折切开复位钢板内固定术;胫骨骨折闭合复位髓内针内固定术
1519	D07儿童骨科、骨盆外科	2024-06-14	2024-06-17	3512084	陈皓楠	男	5Y	肱骨髁上骨折		治愈	张敬东	李玉安	潘天龙	肱骨骨折闭合复位钢针内固定术
1520	D07儿童骨科、骨盆外科	2024-06-08	2024-06-19	3512680	徐小兰	女	63Y	股骨颈骨折	脂肪肝;肝囊肿;后天性肾囊肿;心功能不全;退行性主动脉瓣疾患;二尖瓣及主动脉瓣关闭不全;下肢静脉血栓形成	好转	翁益民	翁益民	蔡乐益	全髋关节置换;髋关节滑膜切除术;髋轴面，陶瓷与金属
1521	D07儿童骨科、骨盆外科	2024-06-04	2024-06-19	3512682	曹娜英	女	81Y	股骨颈骨折	帕金森病;肝血管瘤;肾盂积水，其他的;肺部阴影;肺气肿;主动脉钙化;子宫平滑肌瘤;肝囊肿	好转	孔建中	陈墨川	陈墨川	人工股骨头置换术;关节滑膜切除术
1522	D07儿童骨科、骨盆外科	2024-06-13	2024-06-19	3512691	林煜涛	男	10Y	指骨骨折	拇指开放性损伤;手指挫伤	好转	张敬东	李玉安	潘天龙	指骨骨折切开复位钢针内固定术;皮肤和皮下坏死组织切除清创术;手肌腱、血管、神经探查术
1523	D07儿童骨科、骨盆外科	2024-06-03	2024-06-19	3512694	池金弟	女	85Y	股骨颈骨折	高血压;帕金森病;肝回声不均;后天性肾囊肿;肾盂积水，其他的;下肢动脉粥样硬化;老年性脑萎缩;颈椎退行性病变;颈椎椎管狭窄;心功能不全;退行性主动脉瓣疾患;二尖瓣及主动脉瓣关闭不全;肺动脉高压;多发性脑梗死;脑缺血灶;脱髓鞘性脑病	好转	翁益民	翁益民	蔡乐益	人工股骨头置换术;髋关节滑膜切除术;髋轴面，金属与聚乙烯
1524	D07儿童骨科、骨盆外科	2024-06-16	2024-06-19	3512858	樊绍华	男	51Y	掌骨骨折		好转	翁益民	翁益民	蔡乐益	掌骨骨折闭合复位钢针内固定术
1525	D07儿童骨科、骨盆外科	2024-06-12	2024-06-19	3512861	张一权	男	6Y	桡尺骨骨干骨折		治愈	张敬东	闫广奎	潘天龙	桡骨骨折闭合复位髓内针内固定术;尺骨骨折闭合复位髓内针内固定术
1526	D07儿童骨科、骨盆外科	2024-06-16	2024-06-20	3513184	刘嘉靖	男	5Y	取除骨折内固定装置		其他	张敬东	闫广奎	闫广奎	股骨内固定装置去除术
1527	D07儿童骨科、骨盆外科	2024-06-17	2024-06-20	3513185	李宋嘉钰	男	4Y	肱骨髁上骨折		治愈	张敬东	王伟	潘天龙	肱骨骨折闭合复位钢针内固定术
1528	D07儿童骨科、骨盆外科	2024-06-17	2024-06-20	3513190	王博洋	男	8Y	肱骨髁上骨折	肩和上臂神经损伤	治愈	张敬东	王伟	潘天龙	肱骨骨折闭合复位钢针内固定术
1529	D07儿童骨科、骨盆外科	2024-06-16	2024-06-20	3513194	杨吴昕	女	2Y	胫腓骨闭合性骨折	头部浅表损伤	好转	孔建中	陈墨川	陈墨川	胫骨骨折闭合复位髓内针内固定术
1530	D07儿童骨科、骨盆外科	2024-06-18	2024-06-21	3513323	吴律	女	2Y	肱骨髁上骨折		治愈	张敬东	王伟	潘天龙	肱骨骨折闭合复位钢针内固定术
1531	D07儿童骨科、骨盆外科	2024-06-18	2024-06-21	3513330	李逸	男	4Y	肱骨髁上骨折		治愈	张敬东	李玉安	潘天龙	肱骨骨折闭合复位钢针内固定术
1532	D07儿童骨科、骨盆外科	2024-06-10	2024-06-22	3513558	柯加福	男	63Y	三踝骨折	踝关节半脱位;胫腓远端韧带损伤;腰背部挫伤;腰椎骨折;骨质疏松;胸椎退行性病变;腰椎退行性病变;肺动脉高压;腰椎间盘突出;肺动脉扩张	好转	翁益民	翁益民	蔡乐益	踝关节骨折切开复位螺钉内固定术;踝关节骨折闭合复位髓内针内固定术;踝融合术;腰椎骨折球囊扩张成形术
1533	D07儿童骨科、骨盆外科	2024-06-20	2024-06-22	3513636	黄耒	男	3Y	肱骨髁上骨折		治愈	张敬东	李玉安	潘天龙	肱骨骨折闭合复位钢针内固定术
1534	D07儿童骨科、骨盆外科	2024-06-16	2024-06-22	3513645	卢歆彧	男	14Y	外踝骨折		治愈	张敬东	李玉安	潘天龙	踝关节骨折切开复位螺钉内固定术
1535	D07儿童骨科、骨盆外科	2024-06-07	2024-06-22	3513648	张晴慧	女	6Y	开放性胫腓骨下端骨折	小腿水平肌肉损伤	治愈	张敬东	李玉安	吴宗艺	胫骨骨折切开复位钢针内固定术;皮肤和皮下坏死组织切除清创术;创面封闭式负压引流术（VSD);腓骨骨折切开复位内固定术
1536	D07儿童骨科、骨盆外科	2024-06-18	2024-06-22	3513665	邹梓萱	女	4Y	取除骨折内固定装置		其他	张敬东	李玉安	潘天龙	股骨内固定装置去除术
1537	D07儿童骨科、骨盆外科	2024-06-15	2024-06-23	3514013	郑春存	男	54Y	桡骨远端骨折	钩骨骨折;高血压;脂肪肝;后天性肾囊肿;主动脉钙化;肾结石;腰椎退行性病变;胸椎退行性病变	好转	孔建中	陈墨川	陈墨川	桡骨骨折切开复位钢板内固定术;关节软骨修复术
1538	D07儿童骨科、骨盆外科	2024-06-12	2024-06-23	3514081	卓登设	男	81Y	股骨粗隆下骨折	膝关节退行性病变;间质性肺病;肺气肿合并肺大泡	好转	翁益民	翁益民	蔡乐益	股骨植骨术;股骨骨折闭合复位钢针内固定术
1539	D07儿童骨科、骨盆外科	2024-06-17	2024-06-24	3514318	潘静奇	男	14Y	肱骨外髁骨折		好转	孔建中	陈墨川	陈墨川	肱骨骨折切开复位钢针内固定术;关节软骨修复术
1540	D07儿童骨科、骨盆外科	2024-06-21	2024-06-24	3514417	陈赫翔	男	6Y	肱骨髁上骨折		治愈	张敬东	李玉安	潘天龙	肱骨骨折闭合复位钢针内固定术
1541	D07儿童骨科、骨盆外科	2024-06-21	2024-06-24	3514419	蒋彦博	男	2Y	肱骨髁上骨折		治愈	张敬东	李玉安	潘天龙	肱骨骨折闭合复位钢针内固定术
1542	D07儿童骨科、骨盆外科	2024-06-14	2024-06-25	3514660	宋正国	男	52Y	髌骨骨折	高血压;痛风;脂肪肝;后天性肾囊肿	好转	翁益民	翁益民	蔡乐益	髌骨骨折切开复位张力带钢丝内固定术;关节软骨修复术
1543	D07儿童骨科、骨盆外科	2024-06-18	2024-06-25	3514661	廖延鹏	男	11Y	跖骨骨折		治愈	张敬东	王伟	潘天龙	跖骨骨折切开复位钢针内固定术
1544	D07儿童骨科、骨盆外科	2024-06-21	2024-06-25	3514662	陈柯冰	女	9Y	肱骨髁上骨折	在上臂水平的正中神经损伤	治愈	张敬东	李玉安	潘天龙	肱骨骨折闭合复位钢针内固定术
1545	D07儿童骨科、骨盆外科	2024-06-23	2024-06-25	3514871	邢释元	男	10Y	尺骨和桡骨下端均骨折	前臂神经损伤;因病人家属原因未进行操作	未愈	张敬东	李玉安	潘天龙
1546	D07儿童骨科、骨盆外科	2024-06-18	2024-06-26	3514893	娄阿强	女	82Y	肱骨远端骨折	退行性主动脉瓣疾患;二尖瓣及主动脉瓣关闭不全;后天性肾囊肿;下肢动脉粥样硬化;下肢动脉狭窄	好转	冯永增	冯永增	王贤亮	肱骨骨折切开复位钢板内固定术;关节软骨修复术;肱骨植骨术;尺神经前移术
1547	D07儿童骨科、骨盆外科	2024-06-15	2024-06-26	3514894	谢迪宝	男	60Y	髋臼骨折	耻骨骨折;肺挫伤;肋骨多处骨折;胸壁挫伤;腰椎峡部裂;膝关节退行性病变;慢性肝病;肝回声不均	好转	翁益民	翁益民	蔡乐益	骨盆骨折闭合性复位术;外固定架固定
1548	D07儿童骨科、骨盆外科	2024-06-13	2024-06-26	3514982	陈佳烁	男	11Y	跟骨骨折	跖骨骨折;骶骨骨折;多发性腰椎骨折;上肢浅表损伤	治愈	张敬东	闫广奎	潘天龙	跟骨骨折切开复位钢板内固定术;跖骨骨折切开复位钢板内固定术
1549	D07儿童骨科、骨盆外科	2024-06-20	2024-06-26	3514985	房一娜	女	6Y	桡骨颈骨折	尺骨近端骨折	治愈	张敬东	李玉安	潘天龙	桡骨骨折闭合复位钢针内固定术
1550	D07儿童骨科、骨盆外科	2024-06-19	2024-06-26	3514986	刘宇馨	男	10Y	尺骨和桡骨下端均骨折		治愈	张敬东	李玉安	潘天龙	桡骨骨折切开复位钢板内固定术;尺骨骨折闭合复位髓内针内固定术
1551	D07儿童骨科、骨盆外科	2024-06-22	2024-06-26	3515089	柯碎柳	女	90Y	股骨粗隆间骨折	桡骨远端骨折;高血压;肺气肿;老年性心脏病;多发性肝囊肿;肾结石;后天性肾囊肿;风湿病	好转	孔建中	陈墨川	陈墨川	股骨骨折闭合复位螺钉内固定术
1552	D07儿童骨科、骨盆外科	2024-06-24	2024-06-26	3515090	季子君	女	4Y	肱骨髁上骨折		好转	张敬东	闫广奎	潘天龙	肱骨骨折闭合复位钢针内固定术
1553	D07儿童骨科、骨盆外科	2024-06-18	2024-06-27	3515273	吴文俣	女	3Y	趾骨骨折		治愈	张敬东	李玉安	潘天龙	趾骨骨折切开复位钢针内固定术
1554	D07儿童骨科、骨盆外科	2024-06-23	2024-06-28	3515496	谢钦煜	男	7Y	肱骨髁上骨折		治愈	张敬东	李玉安	潘天龙	肱骨骨折闭合复位钢针内固定术
1555	D07儿童骨科、骨盆外科	2024-06-20	2024-06-29	3515650	汤明梅	女	83Y	股骨颈骨折	膝关节退行性病变;高血压;后天性肾囊肿;轻度肺动脉高压;心功能不全;心室肥大;退行性主动脉瓣疾患;二尖瓣主动脉瓣及三尖瓣关闭不全	好转	翁益民	翁益民	蔡乐益	人工股骨头置换术;关节滑膜切除术;股骨植骨术
1556	D07儿童骨科、骨盆外科	2024-06-22	2024-06-29	3515687	叶兰桂	女	88Y	腰椎骨折	胸椎骨折;骨质疏松;高血压;肾结石;脑缺血灶;主动脉钙化;胆囊结石	治愈	林焱	林仲可	林仲可	经皮穿刺脊柱后凸成形术
1557	D07儿童骨科、骨盆外科	2024-06-10	2024-06-29	3515688	焦裕棚	男	28Y	开放性髌骨骨折	髌韧带损伤;胸椎骨折	好转	翁益民	翁益民	蔡乐益	髌骨骨折切开复位张力带钢丝内固定术;髌韧带缝合术;皮肤和皮下坏死组织切除清创术;创面封闭式负压引流术（VSD)
1558	D07儿童骨科、骨盆外科	2024-06-14	2024-06-30	3516071	谢锐洁	女	14Y	股骨干骨折	锁骨骨折;腰椎骨折;肩胛骨骨折;皮肤挫伤;创伤性牙折断	治愈	张敬东	李玉安	潘天龙	股骨骨折切开复位钢板内固定术;锁骨骨折切开复位钢板内固定术
1559	D07儿童骨科、骨盆外科	2024-06-28	2024-06-30	3516206	王汐语	女	9Y	肱骨外髁骨折		好转	翁益民	翁益民	蔡乐益
1560	D07儿童骨科、骨盆外科	2024-06-22	2024-07-01	3516319	卢碎妹	女	95Y	股骨多处骨折	肝回声不均;肾超声检查异常;下肢静脉血栓形成;退行性主动脉瓣疾患;二尖瓣及主动脉瓣关闭不全;心功能不全	好转	翁益民	翁益民	蔡乐益	股骨骨折闭合复位髓内针内固定术
1561	D07儿童骨科、骨盆外科	2024-06-27	2024-07-01	3516324	杨峰	男	5Y	取除骨折内固定装置		其他	张敬东	李玉安	潘天龙	尺骨内固定装置去除术
1562	D07儿童骨科、骨盆外科	2024-06-26	2024-07-01	3516543	吴嘉轩	男	2Y	趾骨骨折	跖骨骨折;踝和足浅表损伤	好转	张敬东	李玉安	潘天龙	趾骨骨折切开复位钢针内固定术
1563	D07儿童骨科、骨盆外科	2024-06-25	2024-07-03	3516975	陈卓伊	女	4Y	尺骨和桡骨下端均骨折		治愈	张敬东	易先宏	毛诚晃	尺骨骨折切开复位髓内针内固定术;桡骨骨折闭合复位钢针内固定术
1564	D07儿童骨科、骨盆外科	2024-06-26	2024-07-03	3516982	谢尚锦	男	11Y	锁骨骨折		治愈	张敬东	闫广奎	毛诚晃	锁骨骨折切开复位钢板内固定术
1565	D07儿童骨科、骨盆外科	2024-06-16	2024-07-03	3516984	项光权	男	70Y	股骨颈骨折	高血压;高脂血症;胆囊结石;后天性肾囊肿;前列腺结石;循环系统疾病个人史	好转	孔建中	陈墨川	陈墨川	全髋关节置换;髋关节滑膜切除术;髋轴面，陶瓷与聚乙烯
1566	D07儿童骨科、骨盆外科	2024-06-15	2024-07-03	3516996	徐贤香	女	86Y	股骨颈骨折	心力衰竭;高血压;心房颤动;下肢动脉粥样硬化;肝囊肿;肝血管瘤;后天性肾囊肿;肺动脉高压重度;下肢静脉血栓形成	好转	孔建中	陈墨川	陈墨川	人工股骨头置换术;髋关节滑膜切除术;髋轴面，金属与聚乙烯
1567	D07儿童骨科、骨盆外科	2024-06-16	2024-07-03	3516997	余佳颖	女	1Y	股骨粗隆下骨折	股骨髁上骨折;胫骨远端骨折;肺损伤;胸椎多处骨折;腰背部挫伤;失血性休克;大腿后部肌群和肌腱损伤	好转	张敬东	张敬东	朱瑞博	股骨骨折切开复位髓内针内固定术;皮肤和皮下坏死组织切除清创术;股二头肌缝合术;肌腱、血管、神经探查术;股骨骨折闭合复位钢针内固定术;胫骨骨折闭合性复位术;石膏绷带固定
1568	D07儿童骨科、骨盆外科	2024-07-02	2024-07-03	3517059	闫恩泽	男	13Y	指骨骨折		好转	张敬东	易先宏	朱瑞博
1569	D07儿童骨科、骨盆外科	2024-06-26	2024-07-04	3517413	韦雪	女	16Y	趾骨骨折	清创术后	好转	翁益民	翁益民	蔡乐益
1570	D07儿童骨科、骨盆外科	2024-06-30	2024-07-04	3517417	郑梓睿	男	2Y	肱骨髁上骨折		治愈	张敬东	闫广奎	吴宗艺	肱骨骨折闭合复位钢针内固定术
1571	D07儿童骨科、骨盆外科	2024-06-30	2024-07-04	3517422	张宇文	男	3Y	肱骨外髁骨折		治愈	张敬东	闫广奎	吴宗艺	肱骨骨折切开复位钢针内固定术;关节软骨修复术
1572	D07儿童骨科、骨盆外科	2024-06-30	2024-07-04	3517675	郑和龙	男	46Y	锁骨骨折	高血压;后天性肾囊肿;肾结石	治愈	孔建中	陈墨川	陈墨川	锁骨骨折切开复位钢板内固定术;锁骨植骨术
1573	D07儿童骨科、骨盆外科	2024-06-27	2024-07-05	3516980	程俊杰	男	9Y	锁骨骨折		治愈	张敬东	闫广奎	吴宗艺	锁骨骨折切开复位钢板内固定术
1574	D07儿童骨科、骨盆外科	2024-07-02	2024-07-05	3517763	刘天恩	男	7Y	取除骨折内固定装置		其他	张敬东	闫广奎	吴宗艺	尺骨内固定装置去除术
1575	D07儿童骨科、骨盆外科	2024-06-30	2024-07-05	3517779	张彧宁	男	2Y	手指开放性伤口伴有指甲损害	开放性指骨骨折	好转	张敬东	闫广奎	吴宗艺	甲成形术;石膏绷带固定;皮肤和皮下坏死组织切除清创术;拔甲术;皮肤缝合术
1576	D07儿童骨科、骨盆外科	2024-06-30	2024-07-05	3517791	潘浩北	男	7Y	桡骨近端骨折	尺骨近端骨折	治愈	张敬东	闫广奎	吴宗艺	桡骨骨折闭合复位髓内针内固定术
1577	D07儿童骨科、骨盆外科	2024-07-01	2024-07-06	3517963	郑中恒	男	14Y	取除骨折内固定装置	脂肪肝	其他	张敬东	闫广奎	吴宗艺	胫骨内固定装置去除术
1578	D07儿童骨科、骨盆外科	2024-07-03	2024-07-06	3517964	张景硕	男	7Y	取除骨折内固定装置		其他	张敬东	易先宏	朱瑞博	股骨内固定装置去除术
1579	D07儿童骨科、骨盆外科	2024-06-23	2024-07-06	3517992	徐雅馨	女	13Y	股骨头骨折	髋臼骨折;胸椎多处骨折	治愈	张敬东	闫广奎	朱瑞博	股骨骨折切开复位螺钉内固定术;关节软骨修复术
1580	D07儿童骨科、骨盆外科	2024-06-14	2024-07-06	3518106	高云可	男	73Y	双踝骨折	腓骨骨折;膝关节退行性病变;肾结石;肾错构瘤;后天性肾囊肿;前列腺增生	治愈	孔建中	陈墨川	陈墨川	踝关节骨折切开复位钢针内固定术;踝融合术;关节软骨修复术
1581	D07儿童骨科、骨盆外科	2024-06-27	2024-07-07	3518344	陈爱珠	女	80Y	胸椎骨折	高血压;腰椎退行性病变;骨质疏松;腰椎间盘突出;脂肪肝;胆囊胆固醇沉着症;胆囊结石;后天性肾囊肿;心功能不全;二尖(瓣)关闭不全;肾超声检查异常	好转	翁益民	翁益民	蔡乐益	胸椎骨折球囊扩张成形术;椎骨活组织检查
1582	D07儿童骨科、骨盆外科	2024-07-01	2024-07-07	3518353	祝兰妹	女	66Y	桡骨远端骨折	骨质疏松;心功能不全;退行性主动脉瓣疾患;主动脉(瓣)关闭不全	好转	翁益民	翁益民	蔡乐益	桡骨骨折闭合性复位术;外固定架固定
1583	D07儿童骨科、骨盆外科	2024-06-26	2024-07-07	3518549	胡立彪	男	36Y	肱骨大结节骨折	肩袖损伤;肩关节脱位;肩胛骨骨折;后天性肾囊肿;前列腺结石;肺部感染	治愈	孔建中	陈墨川	陈墨川	肱骨骨折切开复位钢板内固定术;肩袖修补术;肩关节脱位手法整复术
1584	D07儿童骨科、骨盆外科	2024-06-16	2024-07-08	3518830	谷美英	女	65Y	双踝骨折	跟骨骨折;足舟骨骨折;楔状骨骨折(足);跖骨骨折;清创术后;腰椎退行性病变;腰骶椎间盘变性	治愈	孔建中	陈墨川	陈墨川	踝关节骨折切开复位钢板内固定术;关节软骨修复术;踝融合术
1585	D07儿童骨科、骨盆外科	2024-06-25	2024-07-08	3518838	王成虎	男	75Y	股骨颈骨折	陈旧性肱骨骨折;高血压;脑卒中后遗症;脂肪肝;胸腔积液;心脏和冠状循环诊断性影像检查的异常所见;二尖瓣脱垂;二尖瓣及主动脉瓣关闭不全;退行性主动脉瓣疾患;心功能不全	好转	翁益民	翁益民	蔡乐益	人工股骨头置换术;髋关节滑膜切除术;髋轴面，陶瓷与金属
1586	D07儿童骨科、骨盆外科	2024-06-25	2024-07-08	3518840	周长有	男	47Y	开放性特指趾骨骨折	骨缺血性坏死	好转	翁益民	翁益民	蔡乐益	趾骨骨折切开复位钢针内固定术;拔甲术;甲成形术;皮肤和皮下坏死组织切除清创术;趾骨内固定装置去除术;趾截断术
1587	D07儿童骨科、骨盆外科	2024-07-04	2024-07-08	3518841	李鑫宇	男	7Y	取除骨折内固定装置		其他	张敬东	易先宏	朱瑞博	腓骨内固定装置去除术
1588	D07儿童骨科、骨盆外科	2024-07-03	2024-07-08	3518842	余永涵	男	6Y	取除骨折内固定装置		其他	张敬东	闫广奎	朱瑞博	股骨内固定装置去除术
1589	D07儿童骨科、骨盆外科	2024-07-04	2024-07-08	3518844	邹兴隆	男	13Y	取除骨折内固定装置		其他	张敬东	易先宏	朱瑞博	锁骨内固定装置去除术
1590	D07儿童骨科、骨盆外科	2024-07-05	2024-07-08	3518846	胡逸	男	13Y	取除骨折内固定装置		其他	张敬东	易先宏	吴宗艺	桡骨内固定装置去除术
1591	D07儿童骨科、骨盆外科	2024-06-23	2024-07-08	3518848	缪起营	男	37Y	髋臼骨折	髂骨骨折;耻骨骨折;腰椎峡部裂;胸腔积液;清创术后;乙型病毒性肝炎;肋骨骨折	治愈	孔建中	陈墨川	陈墨川	骨盆骨折切开复位钢板内固定术
1592	D07儿童骨科、骨盆外科	2024-06-25	2024-07-08	3518887	谢赛菊	女	46Y	腰椎骨折	腰椎退行性病变;腰骶椎间盘突出	好转	孔建中	陈墨川	陈墨川	腰椎骨折切开复位内固定术;腰椎后柱融合术，后入路;2-3个椎骨融合或再融合
1593	D07儿童骨科、骨盆外科	2024-07-03	2024-07-09	3519246	陈彦希	男	9Y	取除骨折内固定装置		其他	张敬东	毛诚晃	朱瑞博	腓骨内固定装置去除术
1594	D07儿童骨科、骨盆外科	2024-07-07	2024-07-10	3519567	黄杨浩	男	2Y	肱骨髁上骨折		治愈	张敬东	易先宏	朱瑞博	肱骨骨折闭合复位钢针内固定术
1595	D07儿童骨科、骨盆外科	2024-07-07	2024-07-10	3519569	潘韵冰	女	6Y	肱骨髁上骨折		治愈	张敬东	易先宏	朱瑞博	肱骨骨折闭合复位钢针内固定术
1596	D07儿童骨科、骨盆外科	2024-07-07	2024-07-10	3519596	陈启涵	男	12Y	取除骨折内固定装置	脂肪肝	其他	张敬东	闫广奎	朱瑞博	锁骨内固定装置去除术
1597	D07儿童骨科、骨盆外科	2024-07-03	2024-07-10	3519719	袁家熙	男	10Y	后天性肘外翻	取除骨折内固定装置	治愈	张敬东	易先宏	朱瑞博	肱骨内固定装置去除术;肱骨截骨术;肱骨内固定术
1598	D07儿童骨科、骨盆外科	2024-07-03	2024-07-11	3520082	李骑骏	男	5Y	肱骨外髁骨折		治愈	张敬东	闫广奎	王伟	肱骨骨折切开复位钢针内固定术;关节软骨修复术
1599	D07儿童骨科、骨盆外科	2024-07-06	2024-07-11	3520113	胡洁	女	33Y	鹰嘴骨折	肺部阴影;肝囊肿	治愈	孔建中	陈墨川	陈墨川	尺骨骨折切开复位钢针内固定术;关节软骨修复术
1600	D07儿童骨科、骨盆外科	2024-07-09	2024-07-11	3520132	吴盛健	男	10Y	肱骨髁上骨折		治愈	张敬东	易先宏	朱瑞博	肱骨骨折闭合复位钢针内固定术
1601	D07儿童骨科、骨盆外科	2024-07-08	2024-07-12	3520482	魏杰	男	34Y	股骨颈骨折	肾结石;后天性肾囊肿;前列腺疾患	治愈	孔建中	陈墨川	陈墨川	股骨骨折闭合复位螺钉内固定术
1602	D07儿童骨科、骨盆外科	2024-07-07	2024-07-13	3520639	张绣绣	女	6Y	取除骨折内固定装置		其他	张敬东	易先宏	朱瑞博	股骨内固定装置去除术;胫骨内固定装置去除术
1603	D07儿童骨科、骨盆外科	2024-07-09	2024-07-13	3520641	谢博睿	男	14Y	取除骨折内固定装置		其他	张敬东	闫广奎	毛诚晃	胫骨内固定装置去除术
1604	D07儿童骨科、骨盆外科	2024-07-10	2024-07-13	3520652	潘雨涵	女	7Y	尺骨茎突骨折伴桡骨远端骨折		治愈	张敬东	易先宏	毛诚晃	桡骨骨折闭合复位钢针内固定术
1605	D07儿童骨科、骨盆外科	2024-07-04	2024-07-13	3520667	陈厚恺	男	10Y	肱骨干骨折	前臂桡神经损伤	好转	翁益民	翁益民	蔡乐益	肱骨骨折切开复位钢板内固定术;桡神经探查术
1606	D07儿童骨科、骨盆外科	2024-07-07	2024-07-14	3520995	李秀芳	女	67Y	胸椎骨折	桡骨远端骨折;高血压;后天性肾囊肿;脊柱骨软骨病	好转	翁益民	翁益民	蔡乐益	胸椎骨折球囊扩张成形术
1607	D07儿童骨科、骨盆外科	2024-07-05	2024-07-14	3521052	陈廷桃	男	72Y	外踝骨折	退行性主动脉瓣疾患;主动脉(瓣)关闭不全	好转	翁益民	翁益民	蔡乐益	踝关节骨折切开复位螺钉内固定术;关节软骨修复术;其他骨移植术
1608	D07儿童骨科、骨盆外科	2024-07-10	2024-07-14	3521118	张诗妮	女	11Y	取除骨折内固定装置		其他	张敬东	易先宏	朱瑞博	踝关节内固定装置去除术
1609	D07儿童骨科、骨盆外科	2024-07-06	2024-07-14	3521126	齐浩宇	男	6Y	髂骨骨折	下肢浅表损伤;头皮血肿	好转	张敬东	闫广奎	朱瑞博
1610	D07儿童骨科、骨盆外科	2024-07-11	2024-07-15	3521478	林子轩	男	9Y	取除骨折内固定装置		其他	张敬东	易先宏	朱瑞博	踝关节内固定装置去除术
1611	D07儿童骨科、骨盆外科	2024-07-11	2024-07-15	3521481	蔡雨欣	女	8Y	取除骨折内固定装置		其他	张敬东	闫广奎	王伟	股骨内固定装置去除术
1612	D07儿童骨科、骨盆外科	2024-07-03	2024-07-15	3521541	邵光分	男	68Y	腰椎骨折	脊椎退行性病变;腰椎间盘突出	治愈	孔建中	陈墨川	陈墨川	腰椎骨折切开复位内固定术
1613	D07儿童骨科、骨盆外科	2024-07-11	2024-07-15	3521547	叶威浩	男	10Y	取除骨折内固定装置		其他	张敬东	易先宏	毛诚晃	腓骨内固定装置去除术
1614	D07儿童骨科、骨盆外科	2024-07-11	2024-07-15	3521550	何佳影	女	8Y	取除骨折内固定装置		其他	张敬东	易先宏	朱瑞博	髋关节内固定物取出术
1615	D07儿童骨科、骨盆外科	2024-06-17	2024-07-15	3521698	胡念春	男	67Y	耻骨骨折	三根肋骨骨折不伴第一肋骨骨折;多发性腰椎骨折;眶骨骨折;受压区压疮;后天性肾囊肿;前列腺钙化灶;多发性脑梗死;脱髓鞘性脑病;胸腔积液;肺部阴影;创伤性湿肺;下肢静脉血栓形成;腰椎椎管狭窄	治愈	孔建中	陈墨川	陈墨川	骨盆骨折切开复位钢板内固定术;腰椎骨折切开复位内固定术;骶髂关节融合术;经导管髂内动脉栓塞术;髂动脉造影
1616	D07儿童骨科、骨盆外科	2024-07-13	2024-07-15	3521739	张春妹	女	59Y	尺骨远端骨折伴桡骨远端骨折	退行性主动脉瓣疾患;主动脉(瓣)关闭不全;肾结石	好转	翁益民	翁益民	蔡乐益	桡骨骨折闭合复位钢针内固定术;外固定架固定
1617	D07儿童骨科、骨盆外科	2024-07-03	2024-07-16	3521854	廖成聪	男	60Y	胫骨干骨折伴腓骨骨折	高血压;肺气肿;肺部阴影;胸腔积液;脂肪肝;后天性肾囊肿	治愈	孔建中	陈墨川	陈墨川	胫骨骨折切开复位钢板内固定术;腓骨骨折闭合复位髓内针内固定术;胫骨植骨术
1618	D07儿童骨科、骨盆外科	2024-07-11	2024-07-16	3521980	王漫妮	女	2Y	肱骨外髁骨折		治愈	张敬东	闫广奎	毛诚晃	肱骨骨折切开复位钢针内固定术;关节软骨修复术
1619	D07儿童骨科、骨盆外科	2024-07-13	2024-07-16	3521984	郭泓霄	男	2Y	股骨干骨折		治愈	张敬东	闫广奎	王伟	股骨骨折闭合性复位术不伴内固定;石膏绷带固定
1620	D07儿童骨科、骨盆外科	2024-07-11	2024-07-17	3522339	郑子愉	男	13Y	锁骨骨折		治愈	张敬东	易先宏	吴宗艺	锁骨骨折切开复位钢板内固定术
1621	D07儿童骨科、骨盆外科	2024-07-13	2024-07-17	3522347	万振杰	男	14Y	取除骨折内固定装置		其他	张敬东	易先宏	毛诚晃	尺骨内固定装置去除术
1622	D07儿童骨科、骨盆外科	2024-07-13	2024-07-18	3522637	何孝良	男	51Y	股骨颈骨折	肺部阴影;痛风;脂肪肝;肝囊肿;后天性肾囊肿	治愈	孔建中	陈墨川	陈墨川	股骨骨折闭合复位螺钉内固定术
1623	D07儿童骨科、骨盆外科	2024-07-13	2024-07-18	3522676	蔡阿琴	女	63Y	肱骨大结节骨折	肩袖损伤;手术后状态，其他特指的	好转	翁益民	翁益民	蔡乐益	肱骨骨折切开复位钢板内固定术;肩袖修补术
1624	D07儿童骨科、骨盆外科	2024-07-03	2024-07-18	3522692	孙爱华	女	81Y	股骨髁上骨折	脑卒中后遗症;高血压;高胆固醇血症;膝关节退行性病变;主动脉钙化;肝胆管扩张;颈动脉硬化;脂肪肝;肝钙化灶;后天性肾囊肿;冠状动脉粥样硬化	治愈	孔建中	陈墨川	陈墨川	股骨骨折切开复位钢板内固定术;股骨植骨术
1625	D07儿童骨科、骨盆外科	2024-07-16	2024-07-20	3523289	吴伊蒙	女	8Y	肱骨外髁骨折	肘关节脱位	治愈	张敬东	易先宏	毛诚晃	肱骨骨折闭合复位钢针内固定术
1626	D07儿童骨科、骨盆外科	2024-07-10	2024-07-20	3523387	李思彤	女	7Y	髂骨骨折	骶髂关节脱位;多处挫伤;开放性腰背部损伤	好转	张敬东	易先宏	吴宗艺
1627	D07儿童骨科、骨盆外科	2024-07-10	2024-07-20	3523395	骆遵源	男	10Y	股骨下端骨折		治愈	张敬东	闫广奎	王伟	股骨骨折闭合复位髓内针内固定术
1628	D07儿童骨科、骨盆外科	2024-07-12	2024-07-20	3523402	彭忠素	女	63Y	尺骨茎突骨折伴桡骨远端骨折	腕关节脱位;头痛;脂肪肝;肝血管瘤;肾结石	治愈	孔建中	陈墨川	陈墨川	桡骨骨折切开复位钢板内固定术;关节软骨修复术
1629	D07儿童骨科、骨盆外科	2024-07-15	2024-07-20	3523430	徐松妹	女	71Y	多发性腰椎骨折	胸椎骨折;腰椎退行性病变;下肢动脉粥样硬化;肝囊肿;胆囊结石;下肢静脉血栓形成	治愈	孔建中	陈墨川	陈墨川	腰椎骨折球囊扩张成形术;胸椎骨折球囊扩张成形术
1630	D07儿童骨科、骨盆外科	2024-07-14	2024-07-20	3523431	郑彩龙	男	54Y	股骨颈骨折	尺骨茎突骨折伴桡骨远端骨折;锁骨骨折;四根以上肋骨骨折不伴第一肋骨骨折;胸腔积液;老年性脑萎缩;脂肪肝;低蛋白血症;腰椎峡部裂;下肢动脉粥样硬化	好转	翁益民	翁益民	蔡乐益	股骨骨折闭合复位螺钉内固定术
1631	D07儿童骨科、骨盆外科	2024-07-14	2024-07-21	3523677	徐文光	男	52Y	股骨颈骨折	桡骨远端骨折;三角骨骨折;清创术后;二尖瓣反流;后天性肾囊肿;前列腺结石	好转	翁益民	翁益民	蔡乐益	股骨骨折闭合复位螺钉内固定术
1632	D07儿童骨科、骨盆外科	2024-07-17	2024-07-21	3523874	林成乐	男	12Y	取除骨折内固定装置		其他	张敬东	闫广奎	朱瑞博	尺骨内固定装置去除术
1633	D07儿童骨科、骨盆外科	2024-07-11	2024-07-22	3524077	谢行远	男	4Y	股骨干骨折		好转	张敬东	易先宏	吴宗艺	股骨骨折闭合复位术;石膏绷带固定;股骨骨折闭合复位术;石膏绷带固定
1634	D07儿童骨科、骨盆外科	2024-07-17	2024-07-22	3524085	徐培豪	男	15Y	取除骨折内固定装置		其他	张敬东	闫广奎	朱瑞博	骨盆内固定装置去除术
1635	D07儿童骨科、骨盆外科	2024-07-03	2024-07-22	3524225	李志红	女	48Y	双踝骨折	踝部开放性损伤伴骨折;踝关节脱位;表达性语言障碍;胆囊息肉	治愈	孔建中	陈墨川	陈墨川	踝关节骨折切开复位钢板内固定术;皮肤和皮下坏死组织切除清创术;踝融合术;关节软骨修复术
1636	D07儿童骨科、骨盆外科	2024-07-20	2024-07-22	3524226	朱丹	女	37Y	手部指伸肌和肌腱损伤	指骨骨折;肝囊肿;肝血管瘤	治愈	孔建中	陈墨川	陈墨川	手部肌腱止点重建术;指骨骨折闭合复位钢针内固定术
1637	D07儿童骨科、骨盆外科	2024-07-20	2024-07-22	3524227	林达祥	男	5Y	肱骨髁上骨折		治愈	张敬东	易先宏	王伟	肱骨骨折闭合复位钢针内固定术
1638	D07儿童骨科、骨盆外科	2024-07-13	2024-07-22	3524229	徐瑜彤	女	15Y	取除骨折内固定装置		其他	张敬东	易先宏	毛诚晃	跟骨内固定物取出术
1639	D07儿童骨科、骨盆外科	2024-07-09	2024-07-23	3524770	张国民	男	57Y	双踝骨折	多处挫伤;下肢静脉血栓形成;腰椎退行性病变;腰椎侧弯;腰骶椎间盘突出;肝回声不均;心功能不全	好转	翁益民	翁益民	蔡乐益	踝关节骨折切开复位钢板内固定术;关节软骨修复术;踝融合术
1640	D07儿童骨科、骨盆外科	2024-07-21	2024-07-24	3524843	王耀伟	男	8Y	取除骨折内固定装置		其他	张敬东	闫广奎	毛诚晃	腓骨内固定装置去除术
1641	D07儿童骨科、骨盆外科	2024-07-15	2024-07-24	3524958	胡健	男	42Y	胫腓骨闭合性骨折	小腿开放性伤口;脂肪肝;肾结石	好转	翁益民	翁益民	蔡乐益	胫骨骨折闭合复位髓内针内固定术
1642	D07儿童骨科、骨盆外科	2024-07-21	2024-07-24	3524961	郑锦浩	男	14Y	取除骨折内固定装置		其他	张敬东	王伟	王伟	肱骨内固定装置去除术
1643	D07儿童骨科、骨盆外科	2024-07-21	2024-07-25	3525311	叶子轩	男	6Y	肱骨髁上骨折		治愈	张敬东	闫广奎	吴宗艺	肱骨骨折闭合复位钢针内固定术
1644	D07儿童骨科、骨盆外科	2024-07-17	2024-07-25	3525333	刘万程	男	8Y	股骨干骨折		治愈	张敬东	吴宗艺	潘天龙	股骨骨折闭合复位髓内针内固定术
1645	D07儿童骨科、骨盆外科	2024-07-18	2024-07-26	3525682	胡培瑶	女	7Y	孟氏骨折		好转	张敬东	易先宏	朱瑞博	尺骨骨折切开复位钢板内固定术;尺骨截骨术
1646	D07儿童骨科、骨盆外科	2024-07-18	2024-07-26	3525701	邱铭朗	男	11Y	胫骨远端骨折伴腓骨骨折		好转	张敬东	张敬东	潘天龙	腓骨骨折切开复位钢板内固定术;胫骨骨折闭合复位内固定术
1647	D07儿童骨科、骨盆外科	2024-07-20	2024-07-26	3525718	林诗涵	女	2Y	肱骨外髁骨折		治愈	易先宏	易先宏	吴宗艺	肱骨骨折切开复位钢针内固定术;关节软骨修复术
1648	D07儿童骨科、骨盆外科	2024-07-18	2024-07-27	3525772	沈适	女	20Y	肱骨近端骨折	肝钙化灶	好转	翁益民	蔡乐益	蔡乐益	肱骨骨折切开复位钢板内固定术
1649	D07儿童骨科、骨盆外科	2024-07-13	2024-07-27	3525875	赵竹英	女	62Y	股骨颈骨折	高血压;心功能不全;二尖瓣反流	好转	翁益民	翁益民	蔡乐益	全髋关节置换;髋轴面，陶瓷与聚乙烯
1650	D07儿童骨科、骨盆外科	2024-07-14	2024-07-27	3525878	诸可英	女	78Y	股骨颈骨折	肺部感染;肝回声不均;髋关节退行性病变;退行性主动脉瓣疾患;二尖瓣及主动脉瓣关闭不全;心功能不全	好转	翁益民	翁益民	蔡乐益	人工股骨头置换术;髋关节滑膜切除术;髋轴面，陶瓷与聚乙烯
1651	D07儿童骨科、骨盆外科	2024-07-22	2024-07-27	3525888	翁卿洋	男	8Y	鹰嘴骨折		好转	张敬东	吴宗艺	潘天龙	尺骨骨折切开复位钢针内固定术
1652	D07儿童骨科、骨盆外科	2024-07-14	2024-07-27	3525898	肖鑫辰	男	3Y	股骨骨折	髂骨骨折;多处皮肤浅表擦伤;急性失血性贫血	治愈	张敬东	闫广奎	吴宗艺	股骨骨折闭合复位髓内针内固定术
1653	D07儿童骨科、骨盆外科	2024-07-22	2024-07-27	3525901	丹子怡	女	9Y	桡骨颈骨折		治愈	张敬东	吴宗艺	潘天龙	桡骨骨折闭合复位髓内针内固定术
1654	D07儿童骨科、骨盆外科	2024-07-20	2024-07-27	3525905	邹以恒	男	5Y	孟氏骨折	前臂桡神经损伤	治愈	张敬东	易先宏	潘天龙	尺骨骨折切开复位钢板内固定术
1655	D07儿童骨科、骨盆外科	2024-07-04	2024-07-27	3525975	侯三平	男	57Y	开放性尺骨桡骨骨干骨折	上肢骨筋膜室综合征;两根肋骨骨折不伴第一肋骨骨折;肝挫伤;肺挫伤;肾恶性肿瘤个人史;高血压;肾后天性缺失;肾结石;肝囊肿;后天性肾囊肿;胆囊结石伴胆囊炎	治愈	孔建中	陈墨川	陈墨川	皮肤和皮下坏死组织切除清创术;创面封闭式负压引流术（VSD);桡骨骨折切开复位螺钉内固定术;皮肤和皮下坏死组织切除清创术;创面封闭式负压引流术（VSD);筋膜松解术;尺骨骨折切开复位钢板内固定术;尺骨植骨术
1656	D07儿童骨科、骨盆外科	2024-07-25	2024-07-28	3526462	陈莀	男	5Y	取除骨折内固定装置		其他	张敬东	易先宏	潘天龙	尺骨内固定装置去除术;桡骨内固定装置去除术
1657	D07儿童骨科、骨盆外科	2024-07-24	2024-07-29	3526729	廖天宇	男	10Y	取除骨折内固定装置		其他	张敬东	张敬东	潘天龙	尺骨内固定装置去除术
1658	D07儿童骨科、骨盆外科	2024-07-23	2024-07-29	3526733	潘家佳	女	7Y	肱骨外髁骨折		治愈	张敬东	王伟	潘天龙	肱骨骨折切开复位钢针内固定术;关节软骨修复术
1659	D07儿童骨科、骨盆外科	2024-07-26	2024-07-29	3526734	季瑾夕	女	11M	肱骨远端骨折		治愈	张敬东	闫广奎	吴宗艺	肱骨骨折闭合复位钢针内固定术
1660	D07儿童骨科、骨盆外科	2024-07-24	2024-07-29	3526736	张胜楷	男	4Y	肱骨髁上骨折		治愈	张敬东	易先宏	吴宗艺	肱骨骨折闭合复位钢针内固定术
1661	D07儿童骨科、骨盆外科	2024-07-16	2024-07-29	3526740	王建国	男	43Y	多发性腰椎骨折	胸椎骨折;肠梗阻;胸腔积液;脊椎退行性病变;下肢动脉粥样硬化;腰骶椎间盘突出;肾结石	治愈	孔建中	陈墨川	陈墨川	腰椎骨折切开复位内固定术;胸椎骨折切开复位内固定术;腰椎后柱融合术，后入路;胸椎融合术，后入路;4-8个椎骨融合或再融合
1662	D07儿童骨科、骨盆外科	2024-07-21	2024-07-29	3526743	赵海濠	男	3Y	股骨骨折		治愈	张敬东	吴宗艺	潘天龙	股骨骨折切开复位髓内针内固定术
1663	D07儿童骨科、骨盆外科	2024-07-26	2024-07-29	3526746	董建铜	男	31Y	肱骨干骨折	脂肪肝;肝钙化灶;前列腺结石	治愈	孔建中	陈墨川	陈墨川	肱骨骨折切开复位钢板内固定术;肱骨植骨术
1664	D07儿童骨科、骨盆外科	2024-07-27	2024-07-31	3527423	彭林恒	男	15Y	取除骨折内固定装置		其他	张敬东	易先宏	吴宗艺	尺骨内固定装置去除术;桡骨内固定装置去除术
1665	D07儿童骨科、骨盆外科	2024-07-28	2024-07-31	3527449	周楠	男	13Y	取除骨折内固定装置		其他	张敬东	易先宏	吴宗艺	胫骨内固定装置去除术
1666	D07儿童骨科、骨盆外科	2024-07-20	2024-07-31	3527452	朱杰	男	52Y	股骨头缺血性坏死	骨折术后;高血压;肾移植状态;胆囊结石;后天性肾囊肿;心功能不全;脂肪肝;肾超声检查异常;老年性心脏瓣膜病	好转	翁益民	翁益民	蔡乐益	全髋关节置换;股骨内固定装置去除术;髋关节滑膜切除术;髋轴面，陶瓷与聚乙烯;股骨植骨术
1667	D07儿童骨科、骨盆外科	2024-07-21	2024-07-31	3527474	董志生	男	72Y	内踝骨折	髂骨骨折;肺气肿合并肺大泡;主动脉钙化;冠状动脉粥样硬化;膝关节退行性病变;后天性肾囊肿;前列腺结石;颈动脉硬化;高血压	治愈	孔建中	陈墨川	陈墨川	踝关节骨折切开复位钢针内固定术;关节软骨修复术;骨盆骨折切开复位螺钉内固定术
1668	D07儿童骨科、骨盆外科	2024-07-03	2024-07-31	3527483	周寿品	男	59Y	小腿前部肌群肌腱损伤	踝开放性伤口;足舟骨骨折;跖骨骨折;多处挫伤;高血压	治愈	孔建中	陈墨川	陈墨川	皮肤和皮下坏死组织切除清创术;创面封闭式负压引流术（VSD);皮肤和皮下坏死组织切除清创术;创面封闭式负压引流术（VSD);下肢肌腱缝合术;皮肤和皮下坏死组织切除清创术
1669	D07儿童骨科、骨盆外科	2024-07-11	2024-08-01	3527948	季小梅	男	68Y	前臂伸肌腱损伤	腓骨骨折;髌韧带损伤;踝开放性伤口;膝开放性伤口;足挫伤;开放性前臂损伤;肾功能不全;肝回声不均;后天性肾囊肿;下肢静脉血栓形成	好转	翁益民	翁益民	蔡乐益	肌腱、血管、神经探查术;石膏绷带固定;前臂肌腱缝合术;皮肤和皮下坏死组织切除清创术;创面封闭式负压引流术（VSD);髌韧带缝合术
1670	D07儿童骨科、骨盆外科	2024-07-27	2024-08-01	3527950	何佳浩	男	9Y	桡尺骨骨干骨折	前臂尺神经损伤	治愈	张敬东	闫广奎	潘天龙	桡骨骨折闭合复位髓内针内固定术;尺骨骨折闭合复位髓内针内固定术
1671	D07儿童骨科、骨盆外科	2024-07-27	2024-08-01	3527955	郑碎红	女	51Y	取除骨折内固定装置	肺部阴影;主动脉钙化;胆囊结石	其他	翁益民	翁益民	蔡乐益	股骨内固定装置去除术
1672	D07儿童骨科、骨盆外科	2024-07-27	2024-08-01	3527959	陈玲微	女	47Y	桡骨远端骨折	肝回声不均;肝囊肿;贫血	好转	翁益民	翁益民	蔡乐益	桡骨骨折闭合复位螺钉内固定术
1673	D07儿童骨科、骨盆外科	2024-07-14	2024-08-01	3527960	李治伟	男	51Y	胫骨平台骨折	膝关节外侧副韧带损伤;膝的其他和未特指部位的扭伤和劳损;半月板撕裂，近期的;膝关节十字韧带损伤;高血压;肾超声检查异常;前列腺结石	好转	翁益民	翁益民	蔡乐益	胫骨骨折切开复位钢板内固定术;关节软骨修复术;副韧带修补术;膝关节的其他修补术
1674	D07儿童骨科、骨盆外科	2024-07-15	2024-08-01	3527961	朱岩昆	男	54Y	胫骨平台骨折	清创术后;膝挫伤;膝关节积液;前列腺增生	治愈	孔建中	陈墨川	陈墨川	胫骨骨折切开复位钢板内固定术;关节软骨修复术;胫骨植骨术
1675	D07儿童骨科、骨盆外科	2024-07-13	2024-08-01	3527964	胡仲克	男	34Y	尺骨冠突骨折	桡骨头骨折;肘关节脱位;脂肪肝	治愈	孔建中	陈墨川	陈墨川	关节软骨修复术;肘关节融合术;筋膜切开术;尺骨骨折切开复位钢板内固定术;关节软骨修复术;桡骨骨折切开复位钢针内固定术
1676	D07儿童骨科、骨盆外科	2024-07-24	2024-08-01	3528014	张学琴	女	64Y	腰椎骨折	高血压;肺恶性肿瘤;脂肪肝;心功能不全;二尖瓣反流	好转	翁益民	翁益民	蔡乐益	腰椎骨折球囊扩张成形术;经皮肺病损射频消融术;肺穿刺活检
1677	D07儿童骨科、骨盆外科	2024-07-29	2024-08-03	3528444	金擎昊	男	15Y	取除骨折内固定装置		其他	张敬东	易先宏	吴宗艺	胫骨内固定装置去除术
1678	D07儿童骨科、骨盆外科	2024-07-23	2024-08-03	3528446	童阿芝	女	90Y	股骨颈骨折	高血压;肺大疱;脂肪肝;胆囊结石;胆总管扩张;主动脉钙化;冠状动脉粥样硬化;下肢静脉血栓形成;肺部感染	治愈	孔建中	陈墨川	陈墨川	人工股骨头置换术;髋轴面，金属与聚乙烯
1679	D07儿童骨科、骨盆外科	2024-07-26	2024-08-03	3528475	郑政权	男	13Y	骨折畸形愈合	后天性肘外翻	好转	张敬东	易先宏	吴宗艺	尺骨骨折切开复位钢板内固定术;尺骨截骨术
1680	D07儿童骨科、骨盆外科	2024-07-31	2024-08-03	3528720	吴贵芬	女	24Y	肩关节脱位	肱骨大结节骨折;肩关节积液	好转	翁益民	翁益民	蔡乐益	肩关节脱位手法整复术
1681	D07儿童骨科、骨盆外科	2024-07-26	2024-08-04	3529067	杨乐澄	男	10Y	髂骨骨折	耻骨骨折;骶髂关节脱位;皮肤挫伤;包茎	好转	张敬东	张敬东	潘天龙
1682	D07儿童骨科、骨盆外科	2024-07-25	2024-08-05	3529132	黄苏曼	女	50Y	踝关节骨折	踝挫伤;脂肪肝;肝囊肿;胆囊结石	好转	翁益民	翁益民	蔡乐益	踝关节骨折切开复位钢板内固定术;关节软骨修复术
1683	D07儿童骨科、骨盆外科	2024-07-27	2024-08-05	3529134	朱碎蕊	女	76Y	三踝骨折	踝关节脱位;脂肪肝;胆囊息肉;心功能不全;高血压;室间隔肥大;心房肥大;退行性主动脉瓣疾患;心房颤动	好转	翁益民	翁益民	蔡乐益	踝关节骨折切开复位钢板内固定术;踝融合术;关节软骨修复术;其他骨移植术
1684	D07儿童骨科、骨盆外科	2024-08-01	2024-08-05	3529343	包雨晨	女	11Y	取除骨折内固定装置		其他	张敬东	易先宏	潘天龙	肱骨内固定装置去除术
1685	D07儿童骨科、骨盆外科	2024-07-31	2024-08-05	3529346	樊健颖	男	14Y	取除骨折内固定装置		其他	张敬东	毛诚晃	吴宗艺	腓骨内固定装置去除术
1686	D07儿童骨科、骨盆外科	2024-08-02	2024-08-05	3529348	李昕琪	女	7Y	孟氏骨折	肱骨外髁骨折;前臂桡神经损伤	好转	张敬东	王伟	潘天龙	尺骨骨折闭合复位钢针内固定术;肱骨骨折闭合复位钢针内固定术
1687	D07儿童骨科、骨盆外科	2024-07-31	2024-08-06	3529657	刘德航	男	8Y	取除骨折内固定装置	脂肪肝	其他	张敬东	易先宏	朱瑞博	股骨内固定装置去除术
1688	D07儿童骨科、骨盆外科	2024-08-03	2024-08-06	3529659	王紫璇	女	10Y	取除骨折内固定装置		其他	张敬东	易先宏	朱瑞博	股骨内固定装置去除术
1689	D07儿童骨科、骨盆外科	2024-07-29	2024-08-06	3529714	方银楷	男	84Y	鹰嘴骨折	肘挫伤;肝囊肿;肾结石;后天性肾囊肿;肝回声不均;退行性主动脉瓣疾患;二尖瓣及主动脉瓣关闭不全	好转	翁益民	翁益民	蔡乐益	尺骨骨折切开复位钢板内固定术
1690	D07儿童骨科、骨盆外科	2024-07-25	2024-08-06	3529721	刘欣冉	女	4Y	掌骨骨折	肺挫伤;创伤性气胸;肝挫伤;头皮血肿;多处挫伤;肋骨骨折;房间隔缺损	好转	张敬东	易先宏	毛诚晃	掌骨骨折切开复位钢针内固定术;筋膜切开术;皮肤和皮下坏死组织切除清创术
1691	D07儿童骨科、骨盆外科	2024-08-03	2024-08-07	3530062	黄显哲	男	18Y	取除骨折内固定装置	脂肪肝	其他	翁益民	翁益民	蔡乐益	腓骨内固定装置去除术
1692	D07儿童骨科、骨盆外科	2024-07-31	2024-08-07	3530072	杨佳宜	女	5Y	肱骨远端骨折	多处挫伤	好转	张敬东	易先宏	朱瑞博	肱骨骨折闭合复位髓内针内固定术
1693	D07儿童骨科、骨盆外科	2024-07-24	2024-08-07	3530149	陈阿尧	男	86Y	股骨颈骨折	高血压;膀胱结石;前列腺增生;颈动脉硬化;肺大疱;主动脉钙化;冠状动脉粥样硬化;陈旧性肋骨骨折;胆汁淤积症;前列腺结石	治愈	孔建中	陈墨川	陈墨川	人工股骨头置换术;髋关节滑膜切除术;髋轴面，金属与聚乙烯
1694	D07儿童骨科、骨盆外科	2024-03-20	2024-08-08	3530725	夏肇苏	男	30Y	手术后切口感染	陈旧性耻骨骨折	好转	孔建中	陈墨川	陈墨川	皮肤和皮下坏死组织切除清创术;股骨内固定装置去除术;创面封闭式负压引流术（VSD);皮肤和皮下坏死组织切除清创术;创面封闭式负压引流术（VSD);皮肤和皮下坏死组织切除清创术;骨空隙骨水泥填充术;股骨病损切除术;骨空隙骨水泥填充术;创面封闭式负压引流术（VSD)
1695	D07儿童骨科、骨盆外科	2024-08-06	2024-08-08	3530737	朱春妹	女	96Y	肱骨近端骨折	陈旧性尺桡骨骨折;颈动脉硬化;肾结石;多发性脑梗死;受压区压疮;肺部感染;胸腔积液;梅毒;乙型病毒性肝炎;贫血	未愈	孔建中	陈墨川	陈墨川
1696	D07儿童骨科、骨盆外科	2024-08-04	2024-08-09	3530833	陈灵俏	女	23Y	跟骨骨折		治愈	孔建中	陈墨川	陈墨川	跟骨骨折切开复位螺钉内固定术
1697	D07儿童骨科、骨盆外科	2024-08-02	2024-08-09	3530858	白宇欣	女	8Y	外踝骨折	胫骨远端骨骺分离	治愈	张敬东	毛诚晃	潘天龙	踝关节骨折闭合复位髓内针内固定术;胫骨骨折切开复位钢板内固定术
1698	D07儿童骨科、骨盆外科	2024-08-01	2024-08-10	3531115	黄彩华	女	79Y	鹰嘴骨折	耻骨骨折;胸腔积液;肺部阴影;多发性肝囊肿;陈旧性肋骨骨折;骨质疏松;颈动脉硬化;肝钙化灶;心包积液	治愈	孔建中	陈墨川	陈墨川	尺骨骨折切开复位钢针内固定术;关节软骨修复术
1699	D07儿童骨科、骨盆外科	2024-08-06	2024-08-10	3531118	姚钰涵	男	11Y	髌骨骨折	髌韧带损伤	好转	张敬东	李玉安	朱瑞博	髌骨骨折切开复位张力带钢丝内固定术;髌韧带缝合术
1700	D07儿童骨科、骨盆外科	2024-08-06	2024-08-10	3531121	季志丞	男	13Y	取除骨折内固定装置	脂肪肝	其他	张敬东	李玉安	朱瑞博	股骨内固定装置去除术
1701	D07儿童骨科、骨盆外科	2024-08-05	2024-08-11	3531534	叶长龙	男	80Y	股骨粗隆间骨折	高血压;2型糖尿病;胃恶性肿瘤个人史;前列腺增生;前列腺囊肿;颈动脉硬化;前列腺结石	治愈	孔建中	陈墨川	陈墨川	股骨骨折闭合复位螺钉内固定术
1702	D07儿童骨科、骨盆外科	2024-08-08	2024-08-11	3531535	胡月黎	女	64Y	桡骨头骨折	尺骨冠突骨折;肘关节脱位;2型糖尿病;脂肪肝;心功能不全;退行性主动脉瓣疾患;二尖瓣及主动脉瓣关闭不全	好转	翁益民	翁益民	蔡乐益
1703	D07儿童骨科、骨盆外科	2024-08-01	2024-08-12	3531904	蔡景德	男	54Y	跟骨骨折	距骨骨折;脂肪肝;前列腺增生;胆囊结石;心功能不全;胆汁淤积症;前列腺结石	好转	翁益民	翁益民	蔡乐益	跟骨骨折切开复位钢板内固定术;关节软骨修复术;跟骨植骨术
1704	D07儿童骨科、骨盆外科	2024-07-31	2024-08-12	3531964	谢弟妹	女	87Y	股骨粗隆间骨折	肺部感染;高血压;肾结石;退行性主动脉瓣疾患;主动脉(瓣)关闭不全;心功能不全	好转	翁益民	翁益民	蔡乐益	股骨骨折闭合复位髓内针内固定术;股骨植骨术
1705	D07儿童骨科、骨盆外科	2024-08-07	2024-08-12	3531968	林朝钊	男	14Y	取除骨折内固定装置		其他	张敬东	潘天龙	潘天龙	桡骨内固定装置去除术
1706	D07儿童骨科、骨盆外科	2024-08-07	2024-08-13	3532247	余轩硕	男	14Y	取除骨折内固定装置		其他	张敬东	李玉安	朱瑞博	股骨内固定装置去除术
1707	D07儿童骨科、骨盆外科	2024-07-31	2024-08-13	3532263	章纯燕	女	63Y	三踝骨折	踝挫伤;2型糖尿病;下肢动脉粥样硬化;脂肪肝;肝囊肿	好转	翁益民	翁益民	蔡乐益	踝关节骨折切开复位钢针内固定术;关节软骨修复术;踝融合术;胫骨植骨术
1708	D07儿童骨科、骨盆外科	2024-07-29	2024-08-13	3532338	吴则华	男	64Y	胫骨骨髓炎	骨折术后;脂肪肝;前列腺结石;高血压;2型糖尿病;过早除极，其他的	好转	孔建中	陈墨川	陈墨川	填充物(水泥)置入或置换
1709	D07儿童骨科、骨盆外科	2024-08-04	2024-08-13	3532343	汤皓然	男	26Y	尺骨鹰嘴骨折		好转	翁益民	翁益民	蔡乐益	尺骨骨折切开复位钢针内固定术;关节软骨修复术;尺骨植骨术
1710	D07儿童骨科、骨盆外科	2024-08-13	2024-08-14	3532871	周靖凯	男	2Y	肱骨髁上骨折		治愈	张敬东	易先宏	朱瑞博	肱骨骨折闭合复位钢针内固定术
1711	D07儿童骨科、骨盆外科	2024-08-12	2024-08-14	3532898	张夏	女	1Y	肱骨髁上骨折		治愈	张敬东	李玉安	朱瑞博	肱骨骨折闭合复位钢针内固定术
1712	D07儿童骨科、骨盆外科	2024-08-09	2024-08-15	3533184	夏艺博	男	4Y	肱骨外髁骨折		治愈	张敬东	易先宏	潘天龙	肱骨骨折切开复位钢针内固定术
1713	D07儿童骨科、骨盆外科	2024-08-07	2024-08-15	3533251	徐若娴	女	11Y	股骨颈骨折		治愈	张敬东	李玉安	朱瑞博	股骨骨折闭合复位螺钉内固定术
1714	D07儿童骨科、骨盆外科	2024-08-11	2024-08-15	3533256	付多多	女	6Y	胫腓骨闭合性骨折	膝挫伤	治愈	张敬东	李玉安	朱瑞博	胫骨骨折闭合复位髓内针内固定术
1715	D07儿童骨科、骨盆外科	2024-07-23	2024-08-15	3533337	刘可树	男	3Y	肱骨髁上骨折	锁骨骨折;第三［动眼］神经麻痹;创伤性硬脑膜下积液;肺挫伤;肝挫伤;心肌损害;乳突炎;皮肤挫伤	治愈	张敬东	易先宏	朱瑞博	肱骨骨折闭合复位钢针内固定术
1716	D07儿童骨科、骨盆外科	2024-08-10	2024-08-15	3533437	徐顺威	男	5Y	肱骨髁上骨折		治愈	孔建中	陈墨川	陈墨川	肱骨骨折闭合复位钢针内固定术
1717	D07儿童骨科、骨盆外科	2024-08-12	2024-08-16	3533577	钟家治	男	4Y	取除骨折内固定装置		其他	张敬东	李玉安	朱瑞博	股骨内固定装置去除术
1718	D07儿童骨科、骨盆外科	2024-08-02	2024-08-16	3533584	章达鑫	男	36Y	跟骨骨折		治愈	孔建中	陈墨川	陈墨川	跟骨骨折切开复位螺钉内固定术
1719	D07儿童骨科、骨盆外科	2024-08-12	2024-08-17	3533771	王克熙	男	10Y	取除骨折内固定装置		其他	张敬东	李玉安	潘天龙	肱骨内固定装置去除术
1720	D07儿童骨科、骨盆外科	2024-08-12	2024-08-18	3534181	王少青	女	49Y	取除骨折内固定装置	胆囊息肉;脂肪肝;高血压;胫骨良性肿瘤;特发性肺纤维化	其他	翁益民	翁益民	蔡乐益	跟骨内固定物取出术;胫骨内固定装置去除术;皮肤瘢痕切除术
1721	D07儿童骨科、骨盆外科	2024-08-13	2024-08-18	3534187	周文东	男	50Y	取除骨折内固定装置	前列腺结石;肺部阴影	其他	翁益民	翁益民	蔡乐益	尺骨内固定装置去除术
1722	D07儿童骨科、骨盆外科	2024-08-09	2024-08-18	3534296	林诗宸	女	7Y	胫骨骨折	小腿开放性伤口	好转	张敬东	易先宏	朱瑞博
1723	D07儿童骨科、骨盆外科	2024-08-13	2024-08-18	3534299	陈碎香	女	54Y	取除骨折内固定装置	脂肪肝;胫骨良性肿瘤	其他	翁益民	翁益民	蔡乐益	髌骨内固定装置去除术;皮肤瘢痕切除术
1724	D07儿童骨科、骨盆外科	2024-08-11	2024-08-18	3534300	严恒立	女	41Y	取除骨折内固定装置	胆囊息肉;脱髓鞘病;脑缺血灶	其他	翁益民	翁益民	蔡乐益	肱骨内固定装置去除术
1725	D07儿童骨科、骨盆外科	2024-08-04	2024-08-18	3534302	傅爱莲	女	86Y	股骨颈骨折	股骨干骨折;高血压;脂肪肝;后天性肾囊肿;子宫多发性平滑肌瘤;主动脉钙化;心功能不全;肝钙化灶;肾钙化;胸椎压缩性骨折;腰椎压缩性骨折;冠状动脉粥样硬化;肾超声检查异常;输尿管扩张;退行性主动脉瓣疾患;腰椎退行性病变	好转	翁益民	翁益民	蔡乐益	人工股骨头置换术;髋轴面，陶瓷与聚乙烯;髋关节滑膜切除术;股骨骨折切开复位内固定术;股骨植骨术
1726	D07儿童骨科、骨盆外科	2024-07-31	2024-08-18	3534312	曹莉莉	女	31Y	股骨干骨折		治愈	孔建中	陈墨川	陈墨川	股骨骨折切开复位钢板内固定术;股骨植骨术
1727	D07儿童骨科、骨盆外科	2024-08-09	2024-08-18	3534316	吕祥俊	男	43Y	髌骨骨折	后天性肾囊肿;肾结石;前列腺结石	治愈	孔建中	陈墨川	陈墨川	髌骨骨折切开复位张力带钢丝内固定术;关节软骨修复术;股四头肌缝合术;髌骨植骨术
1728	D07儿童骨科、骨盆外科	2024-07-26	2024-08-18	3534322	郑显真	男	63Y	胫骨远端骨折伴腓骨骨折	内踝骨折;高血压;尿潴留;退行性主动脉瓣疾患;二尖瓣及主动脉瓣关闭不全;心功能不全;后天性肾囊肿;脑软化灶;基底节出血;脱髓鞘性脑病;脑缺血灶;腔隙性脑梗死;老年性脑变性，不可归类在他处者	好转	翁益民	翁益民	蔡乐益	胫骨骨折切开复位钢板内固定术;腓骨骨折切开复位钢板内固定术;踝关节骨折切开复位钢板内固定术;胫骨植骨术
1729	D07儿童骨科、骨盆外科	2024-08-15	2024-08-18	3534330	徐哲	男	11M	桡尺骨骨干骨折		好转	张敬东	潘天龙	朱瑞博
1730	D07儿童骨科、骨盆外科	2024-08-01	2024-08-18	3534332	李素芬	女	49Y	髋臼骨折	耻骨骨折;泌尿道感染;肝硬化;胸腔积液;下肢静脉血栓形成	治愈	孔建中	陈墨川	陈墨川	骨盆骨折切开复位钢板内固定术;关节软骨修复术
1731	D07儿童骨科、骨盆外科	2024-08-15	2024-08-19	3534676	邓晶晶	女	11Y	取除骨折内固定装置		其他	张敬东	易先宏	潘天龙	尺骨内固定装置去除术;桡骨内固定装置去除术
1732	D07儿童骨科、骨盆外科	2024-08-18	2024-08-19	3534856	周海腾	男	15Y	取除骨折内固定装置	胆囊占位性病变	其他	翁益民	翁益民	蔡乐益	掌骨内固定装置去除术
1733	D07儿童骨科、骨盆外科	2024-08-08	2024-08-19	3535040	马庆珍	女	64Y	股骨粗隆间骨折	股骨骨折;呼吸心跳骤停;尿毒症;腹腔积液;肺肿物;胸腔积液;主动脉钙化;冠状动脉粥样硬化	好转	孔建中	陈墨川	陈墨川	股骨骨折切开复位钢板内固定术;股骨植骨术
1734	D07儿童骨科、骨盆外科	2024-08-13	2024-08-20	3535243	王垂勇	男	5Y	骨折不连接\[假关节\]		治愈	张敬东	李玉安	朱瑞博	桡骨骨折切开复位钢板内固定术;桡骨截骨术;髂骨切除术用作移植物;桡骨植骨术
1735	D07儿童骨科、骨盆外科	2024-08-08	2024-08-20	3535249	金润一	男	4Y	孟氏骨折		治愈	张敬东	易先宏	朱瑞博	尺骨骨折切开复位钢板内固定术;桡骨头脱位切开复位术;尺骨截骨术;上肢关节囊缝合术;石膏托固定术;尺骨骨折切开复位钢板内固定术;尺骨截骨术
1736	D07儿童骨科、骨盆外科	2024-08-15	2024-08-21	3535579	章文杰	男	15Y	上臂尺神经损伤	骨折术后	治愈	张敬东	易先宏	陈栋	尺神经松解术
1737	D07儿童骨科、骨盆外科	2024-08-21	2024-08-21	3535895	阙孝强	男	9Y	肱骨外科颈骨折		好转	张敬东	李玉安	朱瑞博
1738	D07儿童骨科、骨盆外科	2024-08-12	2024-08-22	3536000	赵玉英	女	93Y	股骨粗隆间骨折	骨质疏松;高血压;心包积液;肺部感染;胸腔积液;肝回声不均;肾结石;后天性肾囊肿;肥厚型梗阻性心肌病;脑萎缩;硬脑膜下积液;硬膜外血肿;硬膜下出血(急性)(非创伤性);多发性脑梗死	好转	翁益民	翁益民	蔡乐益	股骨骨折闭合复位髓内针内固定术;股骨植骨术
1739	D07儿童骨科、骨盆外科	2024-08-14	2024-08-22	3536084	冉唯灿	男	2Y	肱骨外髁骨折		治愈	张敬东	易先宏	朱瑞博	肱骨骨折切开复位钢针内固定术;关节软骨修复术
1740	D07儿童骨科、骨盆外科	2024-08-20	2024-08-23	3536293	温晴瑜	女	5Y	肱骨髁上骨折	上臂正中神经损伤	治愈	张敬东	易先宏	朱瑞博	肱骨骨折闭合复位钢针内固定术
1741	D07儿童骨科、骨盆外科	2024-08-17	2024-08-24	3536534	吴承柯	女	7Y	桡骨颈骨折		治愈	张敬东	易先宏	朱瑞博	桡骨骨折闭合复位髓内针内固定术;石膏绷带固定
1742	D07儿童骨科、骨盆外科	2024-08-17	2024-08-24	3536602	单南勇	男	45Y	跟骨骨折	脂肪肝;后天性肾囊肿;肾结石;前列腺结石;肺大疱	好转	翁益民	翁益民	翁益民	跟骨骨折切开复位钢板内固定术;跟骨植骨术
1743	D07儿童骨科、骨盆外科	2024-08-20	2024-08-24	3536687	李荣科	男	13Y	取除骨折内固定装置		其他	张敬东	易先宏	潘天龙	桡骨内固定装置去除术
1744	D07儿童骨科、骨盆外科	2024-08-14	2024-08-24	3536856	张玉妹	女	87Y	股骨粗隆间骨折	骨折术后;下肢静脉血栓形成;肺肿物;胸部肿物;胆囊结石;后天性肾囊肿	治愈	孔建中	陈墨川	陈墨川	股骨骨折闭合复位螺钉内固定术;股骨植骨术
1745	D07儿童骨科、骨盆外科	2024-08-24	2024-08-25	3537121	吕祥润	男	10Y	肱骨髁上骨折		好转	张敬东	易先宏	毛诚晃
1746	D07儿童骨科、骨盆外科	2024-08-23	2024-08-25	3537161	赵望宇	男	3Y	取除骨折内固定装置		其他	张敬东	易先宏	易先宏	肱骨内固定装置去除术
1747	D07儿童骨科、骨盆外科	2024-08-17	2024-08-26	3537668	金建飞	女	52Y	肱骨骨折	肩袖损伤;颈椎退行性病变;颈椎间盘突出;脂肪肝;后天性肾囊肿;肾结石	好转	翁益民	翁益民	蔡乐益	肱骨骨折切开复位钢板内固定术;肩袖修补术;肱骨植骨术
1748	D07儿童骨科、骨盆外科	2024-08-18	2024-08-26	3537687	陈秀芹	女	58Y	锁骨骨折	脂肪肝	好转	翁益民	翁益民	蔡乐益	锁骨骨折切开复位钢板内固定术;锁骨植骨术
1749	D07儿童骨科、骨盆外科	2024-08-17	2024-08-27	3537801	陈玉英	女	82Y	股骨颈骨折	高血压;贫血;低蛋白血症;肺动脉高压中度;心包积液;心功能不全;心脏和冠状循环诊断性影像检查的异常所见;退行性主动脉瓣疾患;二尖瓣退行性变;二尖瓣及主动脉瓣关闭不全	好转	翁益民	翁益民	蔡乐益	人工股骨头置换术;髋关节滑膜切除术;股骨植骨术;髋轴面，金属与聚乙烯
1750	D07儿童骨科、骨盆外科	2024-08-18	2024-08-27	3537818	郑晋	男	11Y	胫腓骨下端骨折	距骨骨折;踝关节半脱位	治愈	张敬东	毛诚晃	潘天龙	胫骨骨折切开复位钢针内固定术;关节软骨修复术;距骨骨折闭合复位术;石膏绷带固定
1751	D07儿童骨科、骨盆外科	2024-08-18	2024-08-28	3538168	林瑞发	男	85Y	股骨粗隆间骨折	膝关节退行性病变;高血压;2型糖尿病;心房扩大;心脏和冠状循环诊断性影像检查的异常所见;退行性主动脉瓣疾患;主动脉(瓣)关闭不全;心功能不全;脂肪肝;胆囊结石;后天性肾囊肿	好转	翁益民	翁益民	蔡乐益	股骨骨折闭合复位髓内针内固定术;股骨植骨术
1752	D07儿童骨科、骨盆外科	2024-08-25	2024-08-28	3538214	叶凡	男	12Y	取除骨折内固定装置		其他	张敬东	毛诚晃	张敬东	尺骨内固定装置去除术
1753	D07儿童骨科、骨盆外科	2024-08-19	2024-08-28	3538304	鲁小红	女	45Y	肩胛骨骨折	肩胛上神经损伤;肾盂积水，其他的;输尿管扩张;胆囊胆固醇沉着症	好转	翁益民	翁益民	蔡乐益	肩胛骨骨折切开复位钢板内固定术;肩胛上神经探查术;肩胛骨植骨术;周围神经松解术
1754	D07儿童骨科、骨盆外科	2024-08-18	2024-08-28	3538309	吴岳诚	男	31Y	桡骨远端骨折	腕关节脱位;头状骨骨折;清创术后;手挫伤;脂肪肝	好转	翁益民	翁益民	蔡乐益	桡骨骨折闭合复位钢针内固定术;桡骨外固定术;腕脱位闭合性复位术
1755	D07儿童骨科、骨盆外科	2024-08-27	2024-08-28	3538315	洪景辉	男	30Y	指骨骨折	后天性槌状指;脂肪肝;肝钙化灶;肺部阴影	治愈	孔建中	陈墨川	陈墨川	指骨骨折切开复位钢针内固定术
1756	D07儿童骨科、骨盆外科	2024-08-24	2024-08-29	3538801	郑春花	女	63Y	股骨颈骨折	胆囊息肉;后天性肾囊肿;肾结石	治愈	孔建中	陈墨川	陈墨川	股骨骨折闭合复位螺钉内固定术
1757	D07儿童骨科、骨盆外科	2024-08-27	2024-08-29	3538844	李宇梵	男	1Y	股骨干骨折		好转	张敬东	毛诚晃	潘天龙	股骨骨折闭合复位术;石膏绷带固定
1758	D07儿童骨科、骨盆外科	2024-08-25	2024-08-29	3538911	王一辰	男	7Y	肱骨髁上骨折		治愈	张敬东	潘天龙	潘天龙	肱骨骨折闭合复位钢针内固定术
1759	D07儿童骨科、骨盆外科	2024-08-21	2024-08-30	3539075	潘碎花	女	95Y	肱骨近端骨折	高血压;老年性心脏瓣膜病;脂肪肝;肝钙化灶;胆囊胆固醇沉着症;多发性脑梗死;老年性脑萎缩	治愈	水小龙	水小龙	汪吉棋	肱骨骨折切开复位钢板内固定术;关节软骨修复术
1760	D07儿童骨科、骨盆外科	2024-08-21	2024-08-31	3539236	康兴武	男	27Y	胫骨骨干骨折	肺大疱;特发性肺纤维化;肾结石;前列腺结石	治愈	孙辽军	孙辽军	何自力	胫骨骨折切开复位钢板内固定术;胫骨植骨术
1761	D07儿童骨科、骨盆外科	2024-08-26	2024-08-31	3539408	戴绮梦	女	9Y	尺骨远端骨折伴桡骨远端骨折		好转	张敬东	李玉安	易先宏	桡骨骨折闭合复位钢针内固定术
1762	D07儿童骨科、骨盆外科	2024-08-23	2024-08-31	3539676	林香姐	女	80Y	股骨颈骨折	下肢静脉血栓形成;房性期前收缩[房性早搏];室性期前收缩;多发性肝囊肿;后天性肾囊肿;胸椎骨折;腰椎骨折;膝关节退行性病变;骨和关节软骨动态未定或动态未知的肿瘤;食管裂孔疝;心脏和冠状循环诊断性影像检查的异常所见	治愈	孔建中	陈墨川	陈墨川	人工股骨头置换术;髋轴面，金属与聚乙烯;髋关节滑膜切除术;下腔静脉滤器置入术;下肢静脉造影
1763	D07儿童骨科、骨盆外科	2024-08-31	2024-09-01	3540116	周新和	男	63Y	肱骨近端骨折	肝囊肿;肾结石;肺肿物	未愈	翁益民	翁益民	王特
1764	D07儿童骨科、骨盆外科	2024-08-25	2024-09-02	3540164	章霆焕	男	9Y	趾伸肌腱断裂	开放性特指趾骨骨折;趾关节脱位	治愈	张敬东	李玉安	毛诚晃	趾肌腱缝合术;皮肤和皮下组织非切除性清创;趾骨骨折切开复位钢针内固定术;趾关节脱位切开复位术;关节软骨修复术
1765	D07儿童骨科、骨盆外科	2024-08-26	2024-09-02	3540168	黄娜美	女	4Y	肱骨外髁骨折	尺骨鹰嘴骨折	治愈	张敬东	李玉安	毛诚晃	肱骨骨折切开复位钢针内固定术;关节软骨修复术
1766	D07儿童骨科、骨盆外科	2024-09-01	2024-09-03	3540518	吴昊天	男	8Y	肱骨髁上骨折		治愈	张敬东	毛诚晃	毛诚晃	肱骨骨折闭合复位钢针内固定术
1767	D07儿童骨科、骨盆外科	2024-08-15	2024-09-03	3540584	李铁沪	男	36Y	股骨干骨折	髌骨骨折	好转	孔建中	余贤斌	余贤斌	股骨骨折切开复位髓内针内固定术;髌骨骨折切开复位张力带钢丝内固定术;关节软骨修复术;股骨牵引
1768	D07儿童骨科、骨盆外科	2024-08-23	2024-09-03	3540815	胡如冰	女	79Y	股骨粗隆间骨折	肱骨大结节骨折;干燥综合征\[舍格伦\];蝶窦炎;肝囊肿;胆囊息肉;肝回声不均	好转	孔建中	余贤斌	余贤斌
1769	D07儿童骨科、骨盆外科	2024-08-11	2024-09-04	3540603	郑升英	女	79Y	桡骨远端骨折	清创术后;气管炎;肺气肿;胆囊结石;胆囊息肉;腹部区域诊断性影像检查的异常所见(包括腹膜后腔)，其他的	好转	孔建中	余贤斌	余贤斌	桡骨骨折切开复位钢板内固定术;关节软骨修复术;桡骨植骨术
1770	D07儿童骨科、骨盆外科	2024-08-24	2024-09-04	3540901	金海美	女	67Y	肱骨干骨折	上臂桡神经损伤;高血压;脂肪肝;心功能不全	好转	翁益民	翁益民	王特	肱骨骨折切开复位钢板内固定术;肱骨植骨术;肌腱、血管、神经探查术;桡神经松解术
1771	D07儿童骨科、骨盆外科	2024-08-23	2024-09-04	3540902	高志蕊	女	67Y	股骨髁上骨折	股骨髁间骨折;骨质疏松;膝关节退行性病变;肝回声不均	好转	翁益民	翁益民	王特	股骨骨折切开复位螺钉内固定术;关节软骨修复术;股骨植骨术
1772	D07儿童骨科、骨盆外科	2024-08-24	2024-09-04	3540904	卓德劝	男	65Y	Pilon骨折	高血压;2型糖尿病;心功能不全;肝回声不均;肝钙化灶;前列腺结石	好转	翁益民	翁益民	王特	胫骨骨折切开复位钢板内固定术;关节软骨修复术;胫骨植骨术;踝融合术
1773	D07儿童骨科、骨盆外科	2024-08-31	2024-09-04	3541079	林秀均	男	14Y	取除骨折内固定装置	肺肿物	其他	翁益民	翁益民	王特	锁骨内固定装置去除术
1774	D07儿童骨科、骨盆外科	2024-09-01	2024-09-04	3541092	叶秋霞	女	62Y	取除骨折内固定装置	心功能不全;脂肪肝;胆囊息肉	其他	翁益民	翁益民	王特	胫骨内固定装置去除术
1775	D07儿童骨科、骨盆外科	2024-08-30	2024-09-04	3541095	徐瑜萱	女	11Y	胫骨下端骨折		治愈	张敬东	易先宏	毛诚晃	胫骨骨折闭合复位内固定术
1776	D07儿童骨科、骨盆外科	2024-08-29	2024-09-05	3541419	钱文呈	男	64Y	胸椎骨折	桡骨远端骨折;指间关节脱位;腰椎间盘突出;后天性肾囊肿;脊椎退行性病变;前列腺结石;肝钙化灶	治愈	孔建中	余贤斌	余贤斌	胸椎骨折球囊扩张成形术;桡骨骨折切开复位钢板内固定术;关节软骨修复术
1777	D07儿童骨科、骨盆外科	2024-09-03	2024-09-05	3541548	黄语语	女	8Y	肱骨髁上骨折		好转	张敬东	李玉安	方明桥	肱骨骨折闭合复位钢针内固定术
1778	D07儿童骨科、骨盆外科	2024-08-21	2024-09-06	3541602	陈美雪	女	71Y	股骨粗隆间骨折	神经源性膀胱;两根肋骨骨折不伴第一肋骨骨折;腰椎退行性病变;陈旧性脊柱骨折;施莫尔结;腰椎间盘突出;椎管内囊肿;完全性右束支传导阻滞;退行性主动脉瓣疾患;心功能不全;脂肪肝;胆囊结石;后天性肾囊肿;高血压;2型糖尿病	治愈	孙辽军	孙辽军	项光恒	股骨骨折闭合复位髓内针内固定术;股骨植骨术
1779	D07儿童骨科、骨盆外科	2024-08-24	2024-09-06	3541604	徐建龙	男	39Y	跟骨骨折	高血压;脂肪肝;乙型病毒性肝炎	好转	孔建中	余贤斌	余贤斌	跟骨骨折切开复位钢板内固定术;关节软骨修复术;跟骨植骨术;创面封闭式负压引流术（VSD)
1780	D07儿童骨科、骨盆外科	2024-08-28	2024-09-06	3541665	徐贤敏	男	41Y	肩胛骨骨折	脂肪肝;前列腺结石;三角肌损伤;冈上肌肌肉损伤	治愈	孔建中	余贤斌	余贤斌	肩胛骨骨折切开复位钢板内固定术;肩关节修补术
1781	D07儿童骨科、骨盆外科	2024-08-28	2024-09-07	3541780	施微妹	女	74Y	髌骨骨折	股四头肌肌肉损伤;脂肪肝;颈动脉硬化;高血压;颈动脉狭窄	治愈	孔建中	余贤斌	余贤斌	髌骨骨折切开复位张力带钢丝内固定术;关节软骨修复术;股四头肌缝合术
1782	D07儿童骨科、骨盆外科	2024-08-30	2024-09-07	3541782	林翠云	女	58Y	取除骨折内固定装置	2型糖尿病;脂肪肝;心功能不全	其他	翁益民	翁益民	王特	肩胛骨内固定装置去除术
1783	D07儿童骨科、骨盆外科	2024-09-02	2024-09-07	3541783	陈耀	男	42Y	取除骨折内固定装置	脂肪肝;前列腺结石	其他	翁益民	翁益民	王特	肱骨内固定装置去除术
1784	D07儿童骨科、骨盆外科	2024-09-02	2024-09-07	3541797	孙金钗	女	60Y	取除骨折内固定装置	膝关节退行性病变;肺肿物;主动脉钙化	其他	翁益民	翁益民	王特	髌骨内固定装置去除术;皮肤瘢痕切除术
1785	D07儿童骨科、骨盆外科	2024-08-24	2024-09-07	3541993	陈美云	女	36Y	锁骨干骨折		好转	翁益民	翁益民	王特	锁骨植骨术;锁骨骨折切开复位钢板内固定术
1786	D07儿童骨科、骨盆外科	2024-08-25	2024-09-08	3542439	卢碎眉	女	77Y	胫骨平台伴腓骨骨折	膝外侧半月板损伤;膝关节积液;高血压;肺肿物;盆腔肿物;心功能不全	好转	翁益民	翁益民	王特	胫骨骨折切开复位钢板内固定术;胫骨植骨术
1787	D07儿童骨科、骨盆外科	2024-08-31	2024-09-09	3542633	谢成翰	男	9Y	肱骨髁上骨折		治愈	张敬东	李玉安	方明桥	肱骨骨折闭合复位钢针内固定术
1788	D07儿童骨科、骨盆外科	2024-08-25	2024-09-09	3542691	谢尚宸	男	10Y	股骨干骨折		治愈	张敬东	李玉安	方明桥	股骨骨折闭合复位髓内针内固定术
1789	D07儿童骨科、骨盆外科	2024-09-05	2024-09-09	3542693	陈德博	男	11Y	肱骨髁上骨折	先天性心脏病术后	治愈	张敬东	李玉安	毛诚晃	肱骨骨折闭合复位钢针内固定术
1790	D07儿童骨科、骨盆外科	2024-09-04	2024-09-09	3542695	杨浩宇	男	2Y	股骨干骨折		治愈	张敬东	李玉安	毛诚晃	股骨骨折闭合性复位术不伴内固定;石膏绷带固定
1791	D07儿童骨科、骨盆外科	2024-08-23	2024-09-09	3542743	齐仁福	男	49Y	跟骨骨折	足趾脱位;骰骨骨折;肺肿物;肝钙化灶	治愈	孔建中	余贤斌	余贤斌	跟骨骨折切开复位钢板内固定术;关节软骨修复术;足和趾脱位的开放性复位术;跟骨植骨术;创面封闭式负压引流术（VSD)
1792	D07儿童骨科、骨盆外科	2024-08-25	2024-09-09	3542744	许玲玲	女	30Y	股骨粗隆间骨折	桡骨远端骨折;股骨头缺血性坏死;髋关节退行性病变;肺钙化;肾积水伴肾结石;附件肿物	治愈	孔建中	余贤斌	余贤斌	股骨骨折切开复位螺钉内固定术;股骨植骨术
1793	D07儿童骨科、骨盆外科	2024-08-24	2024-09-09	3542746	张前	男	15Y	肱骨内髁骨折	肘关节扭伤	治愈	孔建中	余贤斌	余贤斌	肱骨骨折切开复位钢针内固定术;关节软骨修复术
1794	D07儿童骨科、骨盆外科	2024-08-26	2024-09-09	3542747	李超坤	男	48Y	股骨干骨折	股骨转子间骨折;胆囊息肉;膝关节退行性病变	治愈	孔建中	余贤斌	余贤斌	股骨骨折闭合复位髓内针内固定术;股骨植骨术
1795	D07儿童骨科、骨盆外科	2024-09-04	2024-09-09	3542752	谢纯飞	男	49Y	股骨干骨折	膝关节退行性病变;脂肪肝;肝钙化灶;肾结石;前列腺囊肿;主动脉瓣关闭不全;心功能不全	好转	翁益民	翁益民	王特	石膏绷带固定
1796	D07儿童骨科、骨盆外科	2024-08-22	2024-09-09	3542802	陈蓉	女	81Y	股骨粗隆间骨折	冠状动脉粥样硬化性心脏病;十二指肠溃疡;胸腔积液;主动脉钙化;下肢静脉血栓形成;颈动脉硬化;肝血管瘤	治愈	孔建中	余贤斌	余贤斌	股骨骨折闭合复位螺钉内固定术
1797	D07儿童骨科、骨盆外科	2024-09-02	2024-09-09	3542804	杨赛聪	女	68Y	肱骨近端骨折	肩关节脱位;脂肪肝;肺炎;乳房后天性缺失	治愈	孔建中	余贤斌	余贤斌	肱骨骨折切开复位钢板内固定术;肩关节修补术;肱骨植骨术
1798	D07儿童骨科、骨盆外科	2024-08-26	2024-09-10	3543195	朱胜康	男	61Y	胫腓骨下端骨折	高血压;2型糖尿病;心功能不全;脂肪肝;肝内钙化点;前列腺增生;冠状动脉粥样硬化性心脏病;退行性主动脉瓣疾患;二尖瓣退行性变;室间隔肥大	好转	翁益民	翁益民	王特	胫骨骨折切开复位钢板内固定术;腓骨骨折切开复位钢板内固定术
1799	D07儿童骨科、骨盆外科	2024-09-03	2024-09-10	3543197	李思勇	男	46Y	股骨颈骨折	脑术后;肾结石;前列腺结石	好转	翁益民	翁益民	王特	股骨骨折闭合复位螺钉内固定术
1800	D07儿童骨科、骨盆外科	2024-09-04	2024-09-11	3543424	黄可焱	男	7Y	桡骨颈骨折	尺骨近端骨折	治愈	张敬东	闫广奎	闫广奎	桡骨骨折闭合复位髓内针内固定术;尺骨骨折闭合性复位术;石膏绷带固定
1801	D07儿童骨科、骨盆外科	2024-09-05	2024-09-11	3543441	谢政钊	男	9Y	桡骨颈骨折	尺骨冠突骨折	治愈	张敬东	李玉安	方明桥	桡骨骨折闭合复位髓内针内固定术
1802	D07儿童骨科、骨盆外科	2024-09-04	2024-09-11	3543444	吴航	男	14Y	尺骨和桡骨骨干均骨折		治愈	张敬东	王伟	王伟	桡骨骨折闭合复位髓内针内固定术;尺骨骨折闭合复位髓内针内固定术
1803	D07儿童骨科、骨盆外科	2024-09-05	2024-09-11	3543446	石少华	男	10Y	桡骨颈骨折		治愈	张敬东	李玉安	毛诚晃	桡骨骨折闭合复位髓内针内固定术
1804	D07儿童骨科、骨盆外科	2024-09-02	2024-09-12	3543842	沈春茶	女	57Y	髌骨骨折	心功能不全	好转	翁益民	翁益民	王特	髌骨骨折切开复位张力带钢丝内固定术
1805	D07儿童骨科、骨盆外科	2024-09-07	2024-09-12	3543851	何俊熙	男	4Y	尺骨鹰嘴骨折		治愈	张敬东	李玉安	毛诚晃	尺骨骨折闭合复位钢针内固定术
1806	D07儿童骨科、骨盆外科	2024-08-24	2024-09-12	3543856	宋美玉	女	79Y	股骨颈骨折	高血压;肝回声不均;心功能不全;退行性主动脉瓣疾患;室间隔肥大	好转	翁益民	翁益民	王特	人工股骨头置换术;髋关节滑膜切除术;髋轴面，金属与聚乙烯
1807	D07儿童骨科、骨盆外科	2024-09-03	2024-09-12	3543954	滕世银	男	41Y	股骨干骨折	股骨转子间骨折;大腿挫伤;颈椎间盘突出;楔状骨骨折(足);跖骨骨折;趾骨骨折;肺肿物;脂肪肝;肾结石	治愈	孔建中	余贤斌	余贤斌	股骨骨折闭合复位髓内针内固定术
1808	D07儿童骨科、骨盆外科	2024-09-09	2024-09-12	3543985	曹高泽	男	7Y	肱骨髁上骨折		治愈	张敬东	李玉安	毛诚晃	肱骨骨折闭合复位钢针内固定术
1809	D07儿童骨科、骨盆外科	2024-09-04	2024-09-12	3544090	章银花	女	85Y	股骨粗隆间骨折	肝回声不均;后天性肾囊肿;心功能不全;老年性脑萎缩;胸腔积液;主动脉钙化;肺部感染;退行性主动脉瓣疾患;主动脉(瓣)关闭不全	好转	翁益民	翁益民	王特	股骨骨折闭合复位髓内针内固定术
1810	D07儿童骨科、骨盆外科	2024-09-08	2024-09-14	3544448	李杏平	男	37Y	胫骨下端骨折	踝关节半脱位;踝关节软骨损伤;脂肪肝	治愈	孔建中	余贤斌	余贤斌	胫骨骨折切开复位钢板内固定术;关节软骨修复术;踝融合术;胫骨截骨术;胫骨植骨术
1811	D07儿童骨科、骨盆外科	2024-09-10	2024-09-14	3544475	王沐泽	男	2Y	肱骨外髁骨折		治愈	张敬东	李玉安	方明桥	肱骨骨折切开复位钢针内固定术;关节软骨修复术
1812	D07儿童骨科、骨盆外科	2024-08-04	2024-09-14	3544508	项梓涵	女	3Y	开放性特指趾骨骨折	足部皮肤撕裂伤	治愈	张敬东	毛诚晃	毛诚晃	趾骨骨折切开复位钢针内固定术;皮肤和皮下坏死组织切除清创术;创面封闭式负压引流术（VSD);皮肤和皮下坏死组织切除清创术;创面封闭式负压引流术（VSD);带蒂皮瓣移植术;皮肤和皮下坏死组织切除清创术
1813	D07儿童骨科、骨盆外科	2024-09-11	2024-09-14	3544556	黄晓洁	女	7Y	肱骨髁上骨折		治愈	张敬东	张敬东	潘天龙	肱骨骨折闭合复位钢针内固定术
1814	D07儿童骨科、骨盆外科	2024-09-09	2024-09-14	3544561	杨程轩	男	2Y	肱骨髁上骨折	尺骨骨折	治愈	张敬东	李玉安	方明桥	肱骨骨折闭合复位钢针内固定术
1815	D07儿童骨科、骨盆外科	2024-09-03	2024-09-14	3544588	傅荣卫	男	75Y	股骨颈骨折	股骨粗隆间骨折;2型糖尿病;心功能不全;肝回声不均;后天性肾囊肿;骨折术后;室间隔肥大;退行性主动脉瓣疾患;主动脉(瓣)关闭不全	好转	翁益民	翁益民	王特	股骨骨折闭合复位髓内针内固定术
1816	D07儿童骨科、骨盆外科	2024-09-10	2024-09-15	3544845	叶洪美	男	51Y	取除骨折内固定装置	肺肿物;脂肪肝;重复肾;肾结石	其他	翁益民	翁益民	王特	胫骨内固定装置去除术;腓骨内固定装置去除术
1817	D07儿童骨科、骨盆外科	2024-09-04	2024-09-16	3545219	黄良占	男	41Y	跟骨骨折	脂肪肝;前列腺结石;前列腺囊肿;肺部阴影;肺大疱	好转	翁益民	翁益民	王特	跟骨骨折切开复位钢板内固定术
1818	D07儿童骨科、骨盆外科	2024-09-09	2024-09-16	3545276	周嘉仁	男	13Y	尺骨鹰嘴骨折		治愈	张敬东	李玉安	方明桥	尺骨骨折切开复位钢针内固定术;关节软骨修复术
1819	D07儿童骨科、骨盆外科	2024-09-09	2024-09-16	3545356	陈廷铄	男	1Y	股骨干骨折		治愈	张敬东	方明桥	毛诚晃	股骨骨折闭合复位术;石膏绷带固定
1820	D07儿童骨科、骨盆外科	2024-09-12	2024-09-16	3545358	卢洛锌	女	2Y	肱骨外髁骨折		治愈	张敬东	李玉安	毛诚晃	肱骨骨折切开复位钢针内固定术;关节软骨修复术
1821	D07儿童骨科、骨盆外科	2024-08-06	2024-09-16	3545550	黄阿香	女	61Y	开放性胫腓骨下端骨折	下肢开放性伤口;胆囊结石;肝胆管结石;肝胆管扩张	治愈	孔建中	余贤斌	余贤斌	胫骨骨折切开复位钢板内固定术;皮肤和皮下坏死组织切除清创术;皮肤和皮下坏死组织切除清创术;中厚皮片移植术;创面封闭式负压引流术（VSD)
1822	D07儿童骨科、骨盆外科	2024-09-13	2024-09-17	3545681	解子墨	男	2Y	胫腓骨下端骨折		好转	张敬东	李玉安	方明桥
1823	D07儿童骨科、骨盆外科	2024-09-06	2024-09-17	3545816	何子睿	男	6Y	股骨粗隆间骨折		治愈	张敬东	李玉安	毛诚晃	股骨骨折切开复位髓内针内固定术;股骨病损切除术;股骨植骨术
1824	D07儿童骨科、骨盆外科	2024-08-08	2024-09-17	3545906	夏肇苏	男	31Y	手术后切口感染	取除骨折内固定装置	治愈	孔建中	余贤斌	余贤斌	皮肤和皮下坏死组织切除清创术;股骨内固定装置去除术;创面封闭式负压引流术（VSD);皮肤和皮下坏死组织切除清创术;创面封闭式负压引流术（VSD);创面封闭式负压引流术（VSD);皮肤和皮下坏死组织切除清创术
1825	D07儿童骨科、骨盆外科	2024-09-04	2024-09-18	3546011	谢宵妹	女	75Y	骨质疏松伴有病理性骨折	不完全性肠梗阻;高血压;2型糖尿病;脑梗死后遗症;阿尔茨海默病;肺部感染;心功能不全;骨折术后;肝回声不均;胆汁淤积症;肾结石;室间隔肥大;退行性主动脉瓣疾患;主动脉(瓣)关闭不全	好转	翁益民	翁益民	王特	经皮穿刺脊柱后凸成形术;椎骨活组织检查
1826	D07儿童骨科、骨盆外科	2024-09-06	2024-09-18	3546013	陈希琦	男	16Y	股骨干骨折	肝回声不均;肝钙化灶;肾结石;后天性肾囊肿;脾疾病	好转	翁益民	翁益民	王特	股骨骨折闭合复位髓内针内固定术
1827	D07儿童骨科、骨盆外科	2024-09-15	2024-09-18	3546017	向熊也	男	1Y	肱骨远端骨折		治愈	张敬东	王伟	潘天龙	肱骨骨折闭合复位钢针内固定术
1828	D07儿童骨科、骨盆外科	2024-09-14	2024-09-19	3546483	廖彬茹	女	12Y	尺骨和桡骨骨干均骨折		治愈	张敬东	李玉安	方明桥	尺骨骨折切开复位髓内针内固定术;桡骨骨折闭合复位髓内针内固定术
1829	D07儿童骨科、骨盆外科	2024-09-12	2024-09-19	3546505	娄芳俊	男	5Y	骨折畸形愈合		治愈	张敬东	李玉安	毛诚晃	尺骨骨折切开复位钢板内固定术
1830	D07儿童骨科、骨盆外科	2024-09-11	2024-09-19	3546506	陈尔凤	男	56Y	股骨颈骨折	乙型病毒性肝炎;胆囊结石	治愈	孔建中	余贤斌	余贤斌	股骨骨折闭合复位螺钉内固定术
1831	D07儿童骨科、骨盆外科	2024-09-09	2024-09-19	3546613	郑阿菊	女	84Y	股骨颈骨折	高血压;胆囊结石;肾结石;肺大疱;肺肿物;腰椎退行性病变;后天性肾囊肿;腰骶椎间盘突出;腰椎椎管狭窄	治愈	孔建中	余贤斌	余贤斌	髋关节滑膜切除术;人工股骨头置换术;髋轴面，金属与聚乙烯
1832	D07儿童骨科、骨盆外科	2024-09-09	2024-09-19	3546620	包娥妹	女	65Y	肱骨近端骨折	肩袖损伤;骨质疏松;胸腔积液;心包积液;肾结石;肋骨多处骨折;颈椎退行性病变;腰椎退行性病变;颈椎间盘突出;腰椎间盘突出;主动脉钙化;冠状动脉粥样硬化;腰椎间盘变性	治愈	孔建中	余贤斌	余贤斌	肱骨骨折切开复位钢板内固定术;肩关节修补术;肱骨植骨术
1833	D07儿童骨科、骨盆外科	2024-09-18	2024-09-20	3546942	张逸博	男	7Y	肱骨髁上骨折		治愈	张敬东	李玉安	方明桥	肱骨骨折闭合复位钢针内固定术
1834	D07儿童骨科、骨盆外科	2024-09-17	2024-09-21	3547065	诸忠和	男	60Y	取除骨折内固定装置	肝回声不均;多发性肝囊肿	其他	翁益民	翁益民	王特	肩锁关节内固定物取出术
1835	D07儿童骨科、骨盆外科	2024-09-15	2024-09-21	3547066	卢建值	男	57Y	取除骨折内固定装置	高血压;陈旧性肺结核;心功能不全;脂肪肝;肝囊肿;胆囊息肉;前列腺增生	其他	翁益民	翁益民	王特	跟骨内固定物取出术
1836	D07儿童骨科、骨盆外科	2024-09-06	2024-09-21	3547068	罗洪丽	女	52Y	跖骨骨折	跗跖关节脱位;跗骨骨折;肺肿物;肺大疱;主动脉钙化;肝回声不均;胆囊胆固醇沉着症	好转	翁益民	翁益民	王特	跖骨骨折切开复位钢板内固定术;跖跗关节脱位切开复位术
1837	D07儿童骨科、骨盆外科	2024-09-10	2024-09-21	3547072	毛细连	女	65Y	肱骨外髁骨折	肱骨滑车骨折;糖尿病;脂肪肝;冠状动脉粥样硬化性心脏病;肺肿物	治愈	孔建中	余贤斌	余贤斌	肱骨骨折切开复位钢板内固定术;关节软骨修复术;肱骨植骨术
1838	D07儿童骨科、骨盆外科	2024-09-19	2024-09-23	3547950	温庆统	男	1Y	肱骨髁上骨折		治愈	张敬东	毛诚晃	王伟	肱骨骨折闭合复位钢针内固定术
1839	D07儿童骨科、骨盆外科	2024-09-12	2024-09-23	3547951	方国光	男	58Y	胫骨干骨折伴腓骨骨折	外踝骨折;肾结石;前列腺结石;肺气肿合并肺大泡	治愈	孔建中	余贤斌	余贤斌	胫骨骨折切开复位钢板内固定术;腓骨骨折闭合复位髓内针内固定术;踝关节骨折闭合复位髓内针内固定术;胫骨植骨术
1840	D07儿童骨科、骨盆外科	2024-09-12	2024-09-23	3547952	刘诚	男	19Y	指骨骨折不连接	指关节僵硬;肺肿物	治愈	孔建中	余贤斌	余贤斌	指骨骨折切开复位钢板内固定术;指关节囊缝合术;指骨植骨术;指关节松解术
1841	D07儿童骨科、骨盆外科	2024-09-12	2024-09-23	3547954	卢岳良	男	76Y	股骨颈骨折	下肢静脉血栓形成;高血压;心功能不全;脂肪肝;后天性肾囊肿;肾结石;前列腺结石	治愈	孔建中	余贤斌	余贤斌	全髋关节置换;髋关节滑膜切除术;髋轴面，陶瓷与聚乙烯
1842	D07儿童骨科、骨盆外科	2024-09-01	2024-09-23	3547974	陈都	男	11Y	开放性胫骨下端骨折	清创术后;多发性骨盆骨折;脑挫伤;头皮血肿;肝挫伤;失血性休克	治愈	张敬东	张敬东	潘天龙	胫骨骨折闭合复位髓内针内固定术
1843	D07儿童骨科、骨盆外科	2024-09-20	2024-09-23	3548063	俞博严	男	6Y	肱骨髁上骨折		治愈	张敬东	李玉安	吴宗艺	肱骨骨折闭合复位钢针内固定术
1844	D07儿童骨科、骨盆外科	2024-09-10	2024-09-24	3548392	邹长苟	男	51Y	锁骨骨折	肋骨多处骨折;颈椎间盘突出;眶骨骨折;创伤性蛛网膜下腔出血;鼻骨骨折;上颌骨骨折;头皮血肿	治愈	孔建中	余贤斌	余贤斌	锁骨骨折切开复位钢板内固定术
1845	D07儿童骨科、骨盆外科	2024-09-04	2024-09-25	3548663	刘春磊	男	33Y	胫骨远端骨折	陈旧性胫腓骨骨折;陈旧性跟骨骨折;陈旧性肋骨骨折;脂肪肝;肾结石;前列腺结石;肺肿物	好转	翁益民	翁益民	王特	胫骨骨折切开复位钢板内固定术
1846	D07儿童骨科、骨盆外科	2024-09-14	2024-09-25	3548672	周敬	女	28Y	胫骨骨折		好转	翁益民	翁益民	王特	胫骨骨折切开复位钢板内固定术
1847	D07儿童骨科、骨盆外科	2024-09-16	2024-09-25	3548677	赵佳悦	女	3Y	开放性特指趾骨骨折	趾开放性伤口伴有趾甲损坏;趾神经损伤	好转	张敬东	李玉安	陈栋	趾骨骨折切开复位钢针内固定术;甲成形术;皮肤和皮下坏死组织切除清创术
1848	D07儿童骨科、骨盆外科	2024-09-18	2024-09-25	3548680	金恩在	女	5Y	股骨干骨折		治愈	张敬东	闫广奎	毛诚晃	股骨骨折闭合复位髓内针内固定术
1849	D07儿童骨科、骨盆外科	2024-09-14	2024-09-26	3549143	吴龙凤	女	49Y	肱骨大结节骨折	肩袖损伤;脂肪肝;肺肿物;子宫平滑肌瘤;乳房纤维囊性乳腺病	治愈	孔建中	余贤斌	余贤斌	肱骨骨折切开复位钢板内固定术;肩关节修补术;肱骨植骨术;关节软骨修复术
1850	D07儿童骨科、骨盆外科	2024-09-18	2024-09-27	3549494	陆朝旭	男	7Y	股骨干骨折	口腔开放性损伤;下颌骨骨折	治愈	张敬东	李玉安	毛诚晃	股骨骨折闭合复位髓内针内固定术
1851	D07儿童骨科、骨盆外科	2024-09-18	2024-09-27	3549495	李纯丰	男	12Y	胫骨髁间棘骨折		治愈	张敬东	闫广奎	潘天龙	胫骨骨折切开复位螺钉内固定术;关节软骨修复术
1852	D07儿童骨科、骨盆外科	2024-09-24	2024-09-27	3549496	金子依	女	10Y	取除骨折内固定装置		其他	张敬东	闫广奎	毛诚晃	肱骨内固定装置去除术
1853	D07儿童骨科、骨盆外科	2024-09-19	2024-09-27	3549540	陈胜华	男	54Y	跖骨骨折	脂肪肝;胆囊息肉;肾结石;糜烂性胃炎;十二指肠炎	好转	翁益民	翁益民	王特	跖骨骨折切开复位钢板内固定术
1854	D07儿童骨科、骨盆外科	2024-09-23	2024-09-27	3549702	杨明刚	男	47Y	踝关节骨折不连接	骨折术后;踝关节僵硬;肾结石;肺肿物;手术后切口感染	治愈	孔建中	余贤斌	余贤斌	踝关节骨折切开复位钢板内固定术;踝骨病损切除术;关节软骨修复术;髂骨切除术用作移植物;其他骨移植术
1855	D07儿童骨科、骨盆外科	2024-09-23	2024-09-27	3549703	林翔	男	28Y	锁骨骨折	脂肪肝	治愈	孔建中	余贤斌	余贤斌	锁骨骨折切开复位钢板内固定术;锁骨植骨术
1856	D07儿童骨科、骨盆外科	2024-09-12	2024-09-28	3549732	毛若琳	女	4Y	开放性胫腓骨下端骨折	上颌窦骨折	好转	张敬东	李玉安	陈栋	胫骨骨折闭合复位内固定术;腓骨骨折切开复位钢针内固定术;创面封闭式负压引流术（VSD);皮肤和皮下坏死组织切除清创术;游离皮瓣移植术
1857	D07儿童骨科、骨盆外科	2024-09-23	2024-09-28	3549774	朱楷瑞	男	9Y	取除骨折内固定装置		其他	张敬东	李玉安	毛诚晃	股骨内固定装置去除术
1858	D07儿童骨科、骨盆外科	2024-08-05	2024-09-28	3549788	王苏鹏	男	15Y	感染性髋关节炎	骨折术后;后天性肾囊肿;肾结石;肺大疱	治愈	张敬东	张敬东	潘天龙	髋关节病损切除术;皮肤和皮下坏死组织切除清创术;创面封闭式负压引流术（VSD);皮肤和皮下组织切开引流术
1859	D07儿童骨科、骨盆外科	2024-09-24	2024-09-28	3549914	詹芷若	女	6Y	肱骨髁上骨折		治愈	张敬东	李玉安	毛诚晃	肱骨骨折闭合复位钢针内固定术
1860	D07儿童骨科、骨盆外科	2024-09-23	2024-09-28	3549917	汪欣语	女	5Y	肱骨外髁骨折		治愈	张敬东	李玉安	方明桥	关节软骨修复术;肱骨骨折切开复位钢针内固定术
1861	D07儿童骨科、骨盆外科	2024-09-20	2024-09-30	3550670	尤美香	女	76Y	股骨颈骨折	高血压;2型糖尿病;肺大疱;心包积液;主动脉钙化;冠状动脉粥样硬化;肾结石;后天性肾囊肿;二尖瓣反流;慢性左心功能不全;肺动脉高压;肝回声不均	好转	翁益民	翁益民	王特	人工股骨头置换术;髋轴面，陶瓷与聚乙烯
1862	D07儿童骨科、骨盆外科	2024-09-20	2024-09-30	3550673	刘兰花	女	71Y	股骨粗隆间骨折	高血压;主动脉钙化;慢性左心功能不全;胸膜肥厚;二尖瓣及主动脉瓣关闭不全;心功能不全;肝回声不均	好转	翁益民	翁益民	王特	股骨骨折闭合复位髓内针内固定术;股骨植骨术
1863	D07儿童骨科、骨盆外科	2024-09-09	2024-09-30	3550949	张卓浩	男	11Y	跟骨骨折	髋臼骨折;距骨骨折;骰骨骨折	好转	张敬东	李玉安	陈栋	跟骨骨折切开复位钢板内固定术
1864	D07儿童骨科、骨盆外科	2024-09-21	2024-09-30	3550954	郑蕊妹	女	67Y	股骨颈骨折	盆腔积液;乳腺术后;脂肪肝;腰椎退行性病变;肺不张;肺肿物	治愈	孔建中	余贤斌	余贤斌	全髋关节置换;髋轴面，陶瓷与聚乙烯;髋关节滑膜切除术
1865	D07儿童骨科、骨盆外科	2024-09-20	2024-09-30	3550959	汪安定	男	40Y	胫腓骨下端骨折	脂肪肝;肝钙化灶	好转	翁益民	王特	王特	胫骨骨折切开复位内固定术;腓骨骨折切开复位内固定术
1866	D07儿童骨科、骨盆外科	2024-09-25	2024-09-30	3550963	赵俊翔	男	14Y	肱骨内髁骨折		治愈	孔建中	余贤斌	余贤斌	肱骨骨折切开复位钢针内固定术;关节软骨修复术;石膏绷带固定
1867	D07儿童骨科、骨盆外科	2024-09-26	2024-09-30	3551124	洪小平	女	50Y	开放性小腿特指部位骨折	肺肿物;主动脉钙化;甲状腺结节;踝关节积液	治愈	孔建中	余贤斌	余贤斌	踝关节骨折切开复位钢针内固定术;关节软骨修复术;石膏绷带固定
1868	D07儿童骨科、骨盆外科	2024-09-29	2024-10-01	3551335	周宸锌	男	1Y	肱骨外髁骨折		治愈	张敬东	闫广奎	陈栋	肱骨骨折切开复位钢针内固定术;关节软骨修复术
1869	D07儿童骨科、骨盆外科	2024-08-30	2024-10-02	3551311	陶鑫怡	女	12Y	坐骨骨折	跟腱损伤;踝开放性伤口;下肢开放性伤口;足挫伤;小腿挫伤	好转	张敬东	李玉安	陈栋
1870	D07儿童骨科、骨盆外科	2024-09-23	2024-10-02	3551780	吴曰景	男	56Y	取除骨折内固定装置	高血压;半月板损伤;陈旧性膝关节韧带损伤;膝关节积液;下肢动脉粥样硬化;肾结石;肺肿物;肺钙化;肺部感染;诊断性影像检查的异常所见，其他特指身体结构的	其他	翁益民	翁益民	王特	胫骨内固定装置去除术;皮肤瘢痕切除术;桡骨内固定装置去除术
1871	D07儿童骨科、骨盆外科	2024-09-26	2024-10-02	3551796	吴秀琴	女	38Y	股骨干骨折	膝关节积液	治愈	孔建中	余贤斌	余贤斌	股骨骨折闭合复位髓内针内固定术
1872	D07儿童骨科、骨盆外科	2024-09-26	2024-10-02	3551805	徐林斌	男	45Y	开放性胫骨骨干骨折	清创术后;肺大疱;颈椎退行性病变	治愈	孔建中	余贤斌	余贤斌	胫骨骨折切开复位钢板内固定术;皮肤和皮下坏死组织切除清创术;胫骨植骨术
1873	D07儿童骨科、骨盆外科	2024-09-28	2024-10-02	3551818	潘志楷	男	14Y	取除骨折内固定装置		其他	张敬东	闫广奎	吴宗艺	胫骨内固定装置去除术
1874	D07儿童骨科、骨盆外科	2024-09-26	2024-10-03	3551968	金林娇	女	69Y	股骨颈骨折	十二指肠恶性肿瘤;肝继发恶性肿瘤;低蛋白血症;肺部感染;肺肿物;肝囊肿;后天性肾囊肿;肾结石;肺气肿;主动脉钙化;下肢静脉肌间血栓形成;卵巢占位性病变;髋关节退行性病变;下肢动脉粥样硬化	好转	孔建中	余贤斌	余贤斌
1875	D07儿童骨科、骨盆外科	2024-09-26	2024-10-03	3551984	章贤妹	女	61Y	锁骨骨折	肺肿物;脂肪肝;泌尿道感染	治愈	孔建中	余贤斌	余贤斌	锁骨骨折切开复位钢板内固定术;锁骨植骨术
1876	D07儿童骨科、骨盆外科	2024-09-26	2024-10-03	3551987	苏意杰	男	28Y	肱骨外科颈骨折	肩关节脱位;肩袖损伤;癫痫;肩关节积液;肺炎;脂肪肝;先天性胸廓畸形	治愈	孔建中	余贤斌	余贤斌	肱骨骨折切开复位钢板内固定术;肩关节脱位切开复位内固定术;肩关节修补术;关节软骨修复术;肱骨植骨术
1877	D07儿童骨科、骨盆外科	2024-09-21	2024-10-03	3552082	张文轩	男	5Y	股骨干骨折	创伤性气胸;创伤性湿肺	治愈	张敬东	李玉安	毛诚晃	股骨骨折闭合复位髓内针内固定术
1878	D07儿童骨科、骨盆外科	2024-09-25	2024-10-03	3552090	张雨乐	男	7Y	桡尺骨骨干骨折		治愈	张敬东	李玉安	陈栋	桡骨骨折闭合复位髓内针内固定术;尺骨骨折闭合复位髓内针内固定术
1879	D07儿童骨科、骨盆外科	2024-09-30	2024-10-04	3552270	林萌	女	5Y	肱骨髁上骨折		治愈	张敬东	张敬东	朱瑞博	肱骨骨折闭合复位钢针内固定术
1880	D07儿童骨科、骨盆外科	2024-10-02	2024-10-04	3552278	傅莞茹	女	5Y	肱骨髁上骨折		治愈	张敬东	闫广奎	朱瑞博	肱骨骨折闭合复位钢针内固定术
1881	D07儿童骨科、骨盆外科	2024-09-28	2024-10-04	3552352	陶羿成	男	13Y	尺骨鹰嘴骨折		好转	翁益民	翁益民	王特	尺骨骨折切开复位钢针内固定术;尺骨植骨术
1882	D07儿童骨科、骨盆外科	2024-09-26	2024-10-04	3552401	苏诗雅	女	26Y	桡尺骨骨干骨折	前臂正中神经损伤	好转	翁益民	翁益民	王特	桡骨骨折切开复位钢板内固定术;桡骨植骨术;尺骨骨折切开复位钢板内固定术
1883	D07儿童骨科、骨盆外科	2024-10-04	2024-10-06	3552717	张艺馨	女	3Y	肱骨髁上骨折		治愈	张敬东	闫广奎	吴宗艺	肱骨骨折闭合复位钢针内固定术
1884	D07儿童骨科、骨盆外科	2024-10-02	2024-10-06	3552719	吴仁杰	男	4Y	取除骨折内固定装置		其他	张敬东	闫广奎	吴宗艺	胫骨内固定装置去除术
1885	D07儿童骨科、骨盆外科	2024-10-04	2024-10-06	3552721	张皓博	男	3Y	肱骨髁上骨折		治愈	张敬东	闫广奎	方明桥	肱骨骨折闭合复位钢针内固定术
1886	D07儿童骨科、骨盆外科	2024-10-04	2024-10-07	3553006	夏烨	男	5Y	肱骨髁上骨折	儿童孤独症	治愈	张敬东	方明桥	方明桥	肱骨骨折闭合复位钢针内固定术
1887	D07儿童骨科、骨盆外科	2024-09-24	2024-10-07	3553010	王媚媚	女	68Y	股骨粗隆间骨折	高血压;焦虑状态;肝囊肿;主动脉钙化;心包积液;心功能不全;肺肿物;冠状动脉粥样硬化;退行性主动脉瓣疾患;主动脉(瓣)关闭不全	好转	翁益民	翁益民	王特	股骨骨折闭合复位髓内针内固定术;股骨植骨术
1888	D07儿童骨科、骨盆外科	2024-09-27	2024-10-07	3553012	谢小娟	女	30Y	锁骨骨折	乙型病毒性肝炎	好转	翁益民	翁益民	王特	锁骨骨折切开复位钢板内固定术;锁骨植骨术
1889	D07儿童骨科、骨盆外科	2024-09-29	2024-10-08	3553230	杨晴晴	女	27Y	尺骨茎突骨折伴桡骨远端骨折	脂肪肝	好转	翁益民	翁益民	王特	桡骨骨折切开复位钢板内固定术;桡骨植骨术
1890	D07儿童骨科、骨盆外科	2024-10-01	2024-10-08	3553292	叶海静	女	45Y	胫骨干骨折伴腓骨骨折	肺肿物	好转	翁益民	翁益民	王特	胫骨骨折切开复位钢板内固定术;腓骨骨折闭合复位髓内针内固定术;胫骨植骨术
1891	D07儿童骨科、骨盆外科	2024-10-07	2024-10-08	3553297	郑秀兰	女	67Y	股骨颈骨折	高血压;肝回声不均	未愈	翁益民	翁益民	王特
1892	D07儿童骨科、骨盆外科	2024-10-02	2024-10-08	3553300	姚欣邑	女	8Y	髌骨骨折		治愈	张敬东	闫广奎	吴宗艺	髌骨骨折切开复位术
1893	D07儿童骨科、骨盆外科	2024-09-30	2024-10-08	3553303	苏启楠	男	12Y	尺骨和桡骨下端均骨折		好转	翁益民	翁益民	王特	桡骨骨折切开复位钢板内固定术;桡骨植骨术;尺骨骨折切开复位钢板内固定术
1894	D07儿童骨科、骨盆外科	2024-09-30	2024-10-09	3553492	陆杰克	男	15Y	髂骨骨折		好转	张敬东	闫广奎	陈栋	髂骨骨折切开复位螺钉内固定术
1895	D07儿童骨科、骨盆外科	2024-10-01	2024-10-09	3553494	赵崇凯	男	9Y	尺骨和桡骨骨干均骨折		治愈	张敬东	闫广奎	陈栋	尺骨骨折闭合复位髓内针内固定术;桡骨骨折闭合复位髓内针内固定术
1896	D07儿童骨科、骨盆外科	2024-09-29	2024-10-09	3553520	曹博涵	男	3Y	肱骨外髁骨折		治愈	张敬东	李玉安	毛诚晃	肱骨骨折切开复位钢针内固定术;关节软骨修复术
1897	D07儿童骨科、骨盆外科	2024-09-25	2024-10-09	3553525	李庆香	女	91Y	股骨粗隆间骨折	骨质疏松;胸椎退行性病变;腰椎退行性病变;高血压;后天性肾囊肿;心功能不全;肺部阴影	好转	翁益民	翁益民	王特	股骨骨折闭合复位髓内针内固定术;股骨植骨术
1898	D07儿童骨科、骨盆外科	2024-10-05	2024-10-09	3553527	林萱萱	女	11Y	肱骨近端骨折		治愈	张敬东	易先宏	毛诚晃	肱骨骨折闭合复位髓内针内固定术
1899	D07儿童骨科、骨盆外科	2024-09-08	2024-10-10	3553818	林宏柚	男	66Y	小腿挤压伤	胫骨干骨折伴腓骨骨折;高血压;肺部阴影;肺钙化;主动脉钙化;淋巴结钙化;腰椎峡部裂	治愈	孔建中	余贤斌	余贤斌	小腿截断术;创面封闭式负压引流术（VSD);胫骨骨折切开复位钢板内固定术;胫骨植骨术
1900	D07儿童骨科、骨盆外科	2024-09-30	2024-10-10	3553822	郑亦秦	男	12Y	胫骨远端骨折伴腓骨骨折		治愈	张敬东	李玉安	毛诚晃	胫骨骨折切开复位钢板内固定术
1901	D07儿童骨科、骨盆外科	2024-10-06	2024-10-10	3553867	蔡俊哲	男	3Y	肱骨外髁骨折		治愈	张敬东	闫广奎	朱瑞博	肱骨骨折切开复位钢针内固定术;关节软骨修复术
1902	D07儿童骨科、骨盆外科	2024-10-08	2024-10-10	3553868	郑馨语	女	2Y	肱骨外髁骨折		治愈	张敬东	易先宏	朱瑞博	肱骨骨折闭合复位钢针内固定术
1903	D07儿童骨科、骨盆外科	2024-10-04	2024-10-10	3553957	刘家磊	男	6Y	肱骨外髁骨折		治愈	张敬东	闫广奎	朱瑞博	肱骨骨折切开复位钢针内固定术;关节软骨修复术
1904	D07儿童骨科、骨盆外科	2024-10-09	2024-10-10	3553970	吴忠勇	男	40Y	指骨骨折		治愈	高伟阳	林大木	王珑	伸指肌腱缝合术;指间关节固定术
1905	D07儿童骨科、骨盆外科	2024-10-03	2024-10-11	3554167	胡永江	男	34Y	开放性胫骨骨干骨折		好转	水小龙	水小龙	徐宏威	胫骨骨折切开复位钢板内固定术
1906	D07儿童骨科、骨盆外科	2024-10-06	2024-10-12	3554505	林金松	男	63Y	股骨粗隆下骨折	胃恶性肿瘤个人史;肺肿物;肝囊肿;前列腺增生;前列腺结石	好转	翁益民	翁益民	王特	股骨骨折闭合复位髓内针内固定术;股骨植骨术
1907	D07儿童骨科、骨盆外科	2024-10-04	2024-10-12	3554506	李昊然	男	8Y	胫骨远端骨折伴腓骨骨折	腓总神经损伤	治愈	张敬东	闫广奎	朱瑞博	胫骨骨折闭合复位髓内针内固定术;腓骨骨折闭合性复位术;石膏绷带固定
1908	D07儿童骨科、骨盆外科	2024-10-07	2024-10-12	3554509	王艺嘉	女	9Y	锁骨骨折		治愈	张敬东	闫广奎	朱瑞博	锁骨骨折切开复位钢板内固定术
1909	D07儿童骨科、骨盆外科	2024-10-05	2024-10-12	3554510	巨秀芹	女	61Y	桡骨头骨折	尺骨冠突骨折;肘关节脱位;桡侧副韧带断裂;掌骨骨折;指骨骨折;颈部脊髓损伤;颈椎间盘突出;脂肪肝;创伤性牙齿脱落;颈椎退行性病变	好转	翁益民	翁益民	王特	桡骨骨折切开复位钢板内固定术;上肢韧带缝合术
1910	D07儿童骨科、骨盆外科	2024-10-07	2024-10-13	3554854	倪振轩	男	10Y	桡骨颈骨折		治愈	张敬东	闫广奎	朱瑞博	桡骨骨折闭合复位钢针内固定术
1911	D07儿童骨科、骨盆外科	2024-10-02	2024-10-13	3554914	潘水柔	女	12Y	取除骨折内固定装置		其他	张敬东	闫广奎	陈栋	股骨内固定装置去除术;踝关节内固定装置去除术
1912	D07儿童骨科、骨盆外科	2024-08-21	2024-10-14	3550677	杨家选	男	50Y	开放性胫腓骨下端骨折	Pilon骨折;肘关节脱位;肘关节骨折;双踝骨折;小腿开放性伤口;距骨骨折;腰椎骨折;气管憩室;肾结石	治愈	孙辽军	项光恒	项光恒	皮肤和皮下坏死组织切除清创术;胫骨外固定术;肘关节脱位手法整复术;胫骨内固定术;其他骨内固定不伴骨折复位术;创面封闭式负压引流术（VSD);胫骨骨折切开复位钢板内固定术;踝关节骨折切开复位钢板内固定术;关节软骨修复术;胫骨植骨术;上肢韧带缝合术;胫骨外固定术
1913	D07儿童骨科、骨盆外科	2024-10-11	2024-10-14	3555226	陈诚	男	12Y	鹰嘴骨折	桡骨颈骨折	治愈	张敬东	吴宗艺	陈栋	尺骨骨折闭合复位钢针内固定术
1914	D07儿童骨科、骨盆外科	2024-10-07	2024-10-14	3555244	郑慧慧	女	36Y	鹰嘴骨折	甲状腺恶性肿瘤个人史	好转	翁益民	翁益民	王特	尺骨骨折切开复位钢板内固定术;尺骨植骨术
1915	D07儿童骨科、骨盆外科	2024-10-09	2024-10-14	3555286	田梓鑫	男	3Y	取除骨折内固定装置		其他	张敬东	闫广奎	陈栋	股骨内固定装置去除术
1916	D07儿童骨科、骨盆外科	2024-09-26	2024-10-14	3555373	钱章佐	男	69Y	锁骨骨折	腰椎骨折L3;胸腔积液;颈椎骨折;肋骨多处骨折;胸椎多处骨折;创伤性气胸;脂肪肝;前列腺增生;肩胛骨骨折;脑挫伤;创伤性硬膜下出血;颞骨骨折;胸骨骨折;腰椎椎管狭窄;腰椎退行性病变;腰椎间盘突出;肺的其他疾患	治愈	孔建中	余贤斌	余贤斌	锁骨骨折切开复位钢板内固定术;关节软骨修复术;锁骨植骨术
1917	D07儿童骨科、骨盆外科	2024-10-08	2024-10-14	3555376	汪艮纱	女	80Y	股骨颈骨折	尾骨骨折;髋关节退行性病变;老年性骨质疏松;膀胱结石;慢性阻塞性肺病伴有急性加重;慢性呼吸衰竭（II型呼吸衰竭）;胆囊结石;高血压	好转	水小龙	水小龙	徐宏威	人工股骨头置换术;髋关节滑膜切除术;髋轴面，金属与聚乙烯
1918	D07儿童骨科、骨盆外科	2024-10-10	2024-10-15	3555705	杨美兰	女	65Y	尺骨鹰嘴骨折	肺肿物;脂肪肝;胆囊息肉	治愈	水小龙	水小龙	徐宏威	尺骨骨折切开复位钢针内固定术;关节软骨修复术;尺骨植骨术
1919	D07儿童骨科、骨盆外科	2024-10-09	2024-10-15	3555713	陈承景	男	81Y	股骨粗隆间骨折	骨折术后;应激性溃疡伴出血;膝关节退行性病变;痛风性关节炎;心功能不全;脂肪肝;下肢动脉粥样硬化闭塞症;下肢动脉狭窄	治愈	水小龙	水小龙	徐宏威	股骨骨折切开复位髓内针内固定术
1920	D07儿童骨科、骨盆外科	2024-10-10	2024-10-16	3556203	孙娇英	女	63Y	腰椎骨折	陈旧性腰椎骨折;腰椎退行性病变;肾结石;后天性肾囊肿;膀胱憩室;后天性腰椎滑脱;腰骶椎间盘突出;腰骶椎间盘变性	治愈	孔建中	余贤斌	余贤斌	腰椎骨折球囊扩张成形术
1921	D07儿童骨科、骨盆外科	2024-10-07	2024-10-17	3553561	俞育铭	男	10Y	肱骨髁上骨折		治愈	张敬东	易先宏	陈栋	肱骨骨折闭合复位钢针内固定术
1922	D07儿童骨科、骨盆外科	2024-10-03	2024-10-17	3556590	赵招贤	男	59Y	胫骨干骨折伴腓骨骨折	踝关节半脱位;踝关节软骨损伤;脂肪肝;后天性肾囊肿;肾结石	治愈	孔建中	余贤斌	余贤斌	胫骨骨折切开复位钢板内固定术;踝融合术;关节软骨修复术;胫骨植骨术;其他骨内固定不伴骨折复位术
1923	D07儿童骨科、骨盆外科	2024-10-07	2024-10-17	3556761	杨郑英	女	81Y	股骨粗隆间骨折	骨质疏松;特发性(原发性)高血压;下肢动脉粥样硬化	好转	翁益民	翁益民	王特	股骨骨折闭合复位髓内针内固定术;股骨植骨术
1924	D07儿童骨科、骨盆外科	2024-10-16	2024-10-17	3556811	邹品妹	女	91Y	股骨粗隆间骨折		未愈	水小龙	水小龙	徐宏威
1925	D07儿童骨科、骨盆外科	2024-10-15	2024-10-18	3556956	潘浩北	男	7Y	取除骨折内固定装置		其他	张敬东	闫广奎	陈栋	桡骨内固定装置去除术
1926	D07儿童骨科、骨盆外科	2024-10-08	2024-10-19	3557245	刘松英	女	70Y	股骨髁上骨折	腰椎骨折L1;骨质疏松;肺肿物;膝关节积液;脊椎退行性病变;纵隔肿物	好转	翁益民	翁益民	王特	股骨骨折切开复位钢板内固定术;股骨植骨术
1927	D07儿童骨科、骨盆外科	2024-10-04	2024-10-19	3557252	李玉花	女	76Y	股骨颈骨折	高血压;下肢动脉粥样硬化;肺肿物;胸腔积液;肺大疱;心包积液	好转	翁益民	翁益民	王特	人工股骨头置换术;髋轴面，陶瓷与聚乙烯
1928	D07儿童骨科、骨盆外科	2024-10-09	2024-10-19	3557256	陈通建	男	44Y	锁骨骨折	前列腺结石	好转	翁益民	翁益民	王特	锁骨植骨术;锁骨骨折切开复位钢板内固定术
1929	D07儿童骨科、骨盆外科	2024-10-14	2024-10-19	3557259	吴佳俊	男	12Y	桡尺骨骨干骨折		治愈	张敬东	方明桥	陈栋	尺骨骨折闭合复位髓内针内固定术;桡骨骨折闭合复位髓内针内固定术
1930	D07儿童骨科、骨盆外科	2024-10-15	2024-10-19	3557261	胡芷晴	女	10Y	胫骨下端骨折		治愈	张敬东	闫广奎	朱瑞博	胫骨骨折闭合复位内固定术
1931	D07儿童骨科、骨盆外科	2024-10-15	2024-10-19	3557263	温正灿	男	14Y	尺骨和桡骨骨干均骨折		治愈	张敬东	闫广奎	朱瑞博	桡骨骨折闭合复位髓内针内固定术;尺骨骨折闭合复位髓内针内固定术
1932	D07儿童骨科、骨盆外科	2024-10-08	2024-10-19	3557282	苏立花	女	65Y	膝关节退行性病变	膝关节游离体;膝关节僵硬;心功能不全;肺部感染;间质性肺病;主动脉钙化;陈旧性肋骨骨折;陈旧性锁骨骨折;脂肪肝;肝囊肿;肾结石;冠状动脉粥样硬化;肾钙化	治愈	孔建中	余贤斌	余贤斌	全部膝关节置换;膝关节松解术;膝关节滑膜切除术
1933	D07儿童骨科、骨盆外科	2024-10-15	2024-10-19	3557322	吴阿香	女	62Y	取除骨折内固定装置	肺肿物;脂肪肝;骨折术后	其他	翁益民	翁益民	王特	踝关节内固定装置去除术;皮肤瘢痕切除术
1934	D07儿童骨科、骨盆外科	2024-10-07	2024-10-19	3557332	张一焯	男	7Y	开放性尺骨桡骨远端骨折	前臂尺神经损伤;头皮血肿	治愈	张敬东	易先宏	朱瑞博	桡骨骨折切开复位钢针内固定术;尺骨骨折切开复位钢针内固定术;皮肤和皮下坏死组织切除清创术
1935	D07儿童骨科、骨盆外科	2024-10-14	2024-10-20	3557629	邵晨航	男	6Y	桡骨颈骨折		治愈	张敬东	闫广奎	朱瑞博	桡骨骨折闭合复位钢针内固定术;石膏绷带固定
1936	D07儿童骨科、骨盆外科	2024-10-06	2024-10-20	3557666	施侃局	男	10Y	股骨远端骨折	腓总神经损伤	治愈	张敬东	闫广奎	毛诚晃	股骨骨折切开复位钢针内固定术
1937	D07儿童骨科、骨盆外科	2024-10-09	2024-10-20	3557701	薛筱萍	女	68Y	跖骨骨折	泌尿道感染;脂肪肝;胆囊结石;后天性肾囊肿	治愈	孔建中	余贤斌	余贤斌	跖骨骨折切开复位钢板内固定术;跖骨植骨术
1938	D07儿童骨科、骨盆外科	2024-10-12	2024-10-20	3557770	黄彩香	女	88Y	股骨颈骨折	三根肋骨骨折不伴第一肋骨骨折;胸腔积液;肺部感染;甲状腺结节;甲状腺钙化;肝囊肿;高血压;2型糖尿病;泌尿道感染;退行性主动脉瓣疾患;主动脉(瓣)关闭不全;人工髋关节	治愈	孔建中	余贤斌	余贤斌	人工股骨头置换术;髋关节滑膜切除术;髋轴面，金属与聚乙烯
1939	D07儿童骨科、骨盆外科	2024-10-10	2024-10-20	3557792	郑彩弟	女	87Y	肱骨外科颈骨折	关节软骨疾患，其他的;耻骨骨折;腰椎间盘突出;高血压;频发性室性期前收缩;低蛋白血症;胸椎退行性病变;腰椎退行性病变	治愈	孔建中	余贤斌	余贤斌	肱骨骨折切开复位钢板内固定术;关节软骨修复术;肩关节修补术;肱骨植骨术;骨盆骨折切开复位钢板内固定术
1940	D07儿童骨科、骨盆外科	2024-10-14	2024-10-21	3558044	黄小三	男	68Y	肱骨外科颈骨折	桡骨远端骨折;前列腺增生;前列腺囊肿;前列腺结石	好转	翁益民	翁益民	王特	肱骨骨折切开复位钢板内固定术;肱骨植骨术;肩袖修补术
1941	D07儿童骨科、骨盆外科	2024-10-07	2024-10-21	3558050	陈红眉	女	72Y	三踝骨折	踝关节脱位;2型糖尿病;具有心脏起搏器;肺恶性肿瘤个人史;后天性肾囊肿;下肢动脉粥样硬化;高血压	好转	翁益民	翁益民	王特	踝关节骨折切开复位螺钉内固定术;踝关节骨折闭合复位髓内针内固定术;踝脱位开放性复位术
1942	D07儿童骨科、骨盆外科	2024-10-02	2024-10-21	3558059	李永睿	男	5Y	胫腓骨下端骨折		治愈	张敬东	闫广奎	毛诚晃	胫骨骨折闭合复位内固定术;腓骨骨折切开复位钢板内固定术
1943	D07儿童骨科、骨盆外科	2024-10-09	2024-10-21	3558242	陈碎尧	男	77Y	股骨粗隆下骨折	2型糖尿病;膝关节退行性病变;后天性肾囊肿;骨疾患;下肢静脉血栓形成	好转	翁益民	翁益民	王特	股骨骨折切开复位髓内针内固定术;股骨植骨术
1944	D07儿童骨科、骨盆外科	2024-10-13	2024-10-21	3558255	潘星星	男	13Y	胫骨远端骨折伴腓骨骨折		治愈	张敬东	易先宏	陈栋	腓骨骨折切开复位钢板内固定术;胫骨骨折闭合复位内固定术
1945	D07儿童骨科、骨盆外科	2024-10-10	2024-10-21	3558258	曾若楠	女	2Y	第一掌骨骨折	锁骨骨折;肩胛骨骨折;肱骨骨折	好转	张敬东	闫广奎	朱瑞博	皮肤和皮下组织切开探查术;肌肉筋膜切开减压术;石膏绷带固定
1946	D07儿童骨科、骨盆外科	2024-10-17	2024-10-21	3558262	胡英炫	男	5Y	孟氏骨折	指骨骨折;前臂桡神经损伤	治愈	张敬东	闫广奎	朱瑞博	指骨骨折闭合复位钢针内固定术;尺骨骨折闭合复位钢针内固定术;石膏绷带固定
1947	D07儿童骨科、骨盆外科	2024-10-13	2024-10-22	3557662	徐贤峰	男	48Y	趾伸肌腱断裂	趾开放性伤口伴有趾甲损坏;开放性特指趾骨骨折;2型糖尿病	治愈	孔建中	余贤斌	余贤斌	趾肌腱缝合术;趾骨骨折切开复位钢针内固定术;甲成形术;关节软骨修复术;皮肤和皮下坏死组织切除清创术;石膏绷带固定
1948	D07儿童骨科、骨盆外科	2024-10-20	2024-10-22	3558582	张昕熙	女	8Y	锁骨骨折		好转	张敬东	张敬东	朱瑞博
1949	D07儿童骨科、骨盆外科	2024-10-15	2024-10-22	3558594	陈涛	男	14Y	胫骨下端骨折		治愈	张敬东	张敬东	朱瑞博	胫骨骨折切开复位螺钉内固定术;石膏绷带固定
1950	D07儿童骨科、骨盆外科	2024-10-21	2024-10-22	3558808	蔡桂爱	女	46Y	桡骨远端骨折	下尺桡关节脱位	好转	翁益民	王特	王特
1951	D07儿童骨科、骨盆外科	2024-10-19	2024-10-23	3559226	范晓东	男	48Y	取除骨折内固定装置	甲状腺结节;肺肿物	其他	翁益民	翁益民	王特	髌骨内固定装置去除术;皮肤瘢痕切除术
1952	D07儿童骨科、骨盆外科	2024-10-19	2024-10-24	3559440	周峰	男	34Y	取除骨折内固定装置	脂肪肝;肝钙化灶;前列腺结石	其他	翁益民	翁益民	王特	踝关节内固定装置去除术
1953	D07儿童骨科、骨盆外科	2024-10-10	2024-10-24	3559444	金晓军	男	10Y	肱骨干骨折	股骨骨折;枢椎骨折;头皮裂伤;头皮血肿	治愈	张敬东	闫广奎	陈栋	肱骨骨折闭合复位髓内针内固定术;股骨骨折闭合复位髓内针内固定术
1954	D07儿童骨科、骨盆外科	2024-10-20	2024-10-24	3559446	高则	男	4Y	肱骨髁上骨折		治愈	张敬东	闫广奎	陈栋	肱骨骨折闭合复位钢针内固定术
1955	D07儿童骨科、骨盆外科	2024-10-12	2024-10-24	3559449	毛柏令	男	66Y	胫骨干骨折伴腓骨骨折	外踝骨折;清创术后;高血压;脂肪肝	好转	翁益民	翁益民	王特	胫骨骨折切开复位钢板内固定术;踝关节骨折闭合复位髓内针内固定术;胫骨植骨术
1956	D07儿童骨科、骨盆外科	2024-10-22	2024-10-24	3559626	徐承浩	男	8Y	肱骨髁上骨折		治愈	张敬东	闫广奎	吴宗艺	肱骨骨折闭合复位钢针内固定术
1957	D07儿童骨科、骨盆外科	2024-10-14	2024-10-24	3559685	夏崇玉	女	77Y	股骨头无菌性坏死	骨折术后;髋关节退行性病变;肺部阴影;胸腔积液;心功能不全;具有心脏和血管植入物和移植物	好转	翁益民	翁益民	王特	人工股骨头置换术;髋轴面，陶瓷与聚乙烯
1958	D07儿童骨科、骨盆外科	2024-10-08	2024-10-24	3559689	金小荣	男	61Y	股骨粗隆间骨折	第一掌骨骨折;肱骨大结节骨折;肩关节脱位;开放性手部损伤;肋骨多处骨折;肺肿物;前列腺钙化灶;胸腔积液;肾钙化	好转	翁益民	翁益民	王特	股骨骨折闭合复位髓内针内固定术;掌骨骨折切开复位钢针内固定术;肱骨骨折切开复位钢板内固定术;股骨植骨术;肱骨植骨术;肩关节脱位手法整复术;皮肤和皮下坏死组织切除清创术;肌腱、血管、神经探查术;上肢关节囊缝合术;石膏绷带固定
1959	D07儿童骨科、骨盆外科	2024-10-15	2024-10-24	3559760	程淑敏	女	72Y	股骨颈骨折	心功能不全;泌尿道感染;胆囊结石;副脾;肾结石	治愈	孔建中	余贤斌	余贤斌	人工股骨头置换术;髋关节滑膜切除术;髋轴面，陶瓷与聚乙烯
1960	D07儿童骨科、骨盆外科	2024-10-21	2024-10-26	3560143	余应荣	男	70Y	取除骨折内固定装置	肺大疱;高血压;脂肪肝;后天性肾囊肿;前列腺增生;前列腺结石;手术后状态，其他特指的;肾后天性缺失	其他	翁益民	翁益民	王特	股骨内固定装置去除术;髌骨内固定装置去除术;皮肤瘢痕切除术
1961	D07儿童骨科、骨盆外科	2024-10-19	2024-10-26	3560215	黄敬杰	男	13Y	骨盆骨折	脂肪肝	好转	翁益民	翁益民	王特	骨盆骨折切开复位钢板内固定术;髂骨植骨术
1962	D07儿童骨科、骨盆外科	2024-10-22	2024-10-26	3560218	胡睿锌	女	1Y	趾开放性伤口伴有趾甲损坏	趾骨骨折	治愈	张敬东	吴宗艺	陈栋	甲成形术;拔甲术;皮肤和皮下坏死组织切除清创术
1963	D07儿童骨科、骨盆外科	2024-10-22	2024-10-26	3560219	朱奕丞	男	10Y	桡骨远端骨折		治愈	张敬东	闫广奎	朱瑞博	桡骨骨折闭合复位钢针内固定术;石膏绷带固定
1964	D07儿童骨科、骨盆外科	2024-09-22	2024-10-26	3560235	石阿翠	女	84Y	股骨假体周围骨折	人工膝关节;关节僵硬;骨赘;后天性肾囊肿;胆总管扩张;窦性心动过速;动脉硬化;老年性心脏瓣膜病;贫血;低蛋白血症;肺部感染;阴道炎	治愈	孔建中	余贤斌	余贤斌	股骨骨折切开复位钢板内固定术;股骨植骨术;膝关节松解术;髌骨病损切除术
1965	D07儿童骨科、骨盆外科	2024-10-19	2024-10-26	3560237	包娥妹	女	65Y	肱骨近端骨折	肩袖损伤;骨折术后恢复期;四根以上肋骨骨折不伴第一肋骨骨折;胸腔积液;心功能不全;高血压;心包积液;主动脉钙化;冠状动脉粥样硬化	治愈	孔建中	余贤斌	余贤斌	肱骨骨折切开复位螺钉内固定术;肩关节修补术
1966	D07儿童骨科、骨盆外科	2024-10-13	2024-10-26	3560283	李昌明	男	34Y	股骨内髁骨折	大腿挫伤;小腿挫伤;膝关节后十字韧带损伤;膝的其他和未特指部位的扭伤和劳损;膝挫伤;半月板撕裂，近期的;膝关节积液;肺部阴影;坠积性肺炎	治愈	孔建中	余贤斌	余贤斌	股骨骨折切开复位螺钉内固定术;石膏绷带固定
1967	D07儿童骨科、骨盆外科	2024-10-20	2024-10-27	3560574	吴慧冉	女	9Y	开放性桡骨下端骨折		治愈	张敬东	闫广奎	朱瑞博	桡骨骨折切开复位钢针内固定术;皮肤和皮下坏死组织切除清创术
1968	D07儿童骨科、骨盆外科	2024-10-21	2024-10-27	3560577	葛瑞雪	女	1Y	尺骨和桡骨下端均骨折		好转	张敬东	毛诚晃	陈栋	尺骨骨折切开复位钢针内固定术
1969	D07儿童骨科、骨盆外科	2024-10-20	2024-10-28	3561079	黄维菊	女	64Y	锁骨骨折	外踝骨折;肋骨骨折;胸椎骨折;肺肿物	好转	翁益民	翁益民	王特	锁骨骨折切开复位钢板内固定术;锁骨植骨术
1970	D07儿童骨科、骨盆外科	2024-10-24	2024-10-28	3561084	李游	男	5Y	肱骨髁上骨折		治愈	张敬东	易先宏	朱瑞博	肱骨骨折闭合复位钢针内固定术
1971	D07儿童骨科、骨盆外科	2024-10-21	2024-10-28	3561088	杨皓淇	男	3Y	肱骨外髁骨折		治愈	张敬东	易先宏	朱瑞博	肱骨骨折切开复位钢板内固定术;关节软骨修复术
1972	D07儿童骨科、骨盆外科	2024-10-14	2024-10-28	3561090	吴昌国	男	7Y	股骨干骨折	颞骨骨折;颅腔积气;头皮血肿;腹腔积液	治愈	张敬东	易先宏	朱瑞博	股骨骨折切开复位髓内针内固定术
1973	D07儿童骨科、骨盆外科	2024-10-21	2024-10-28	3561098	邱秀球	女	55Y	取除骨折内固定装置	骨质增生;甲状腺结节;脂肪肝;肝囊肿;骨质疏松	其他	翁益民	翁益民	王特	股骨内固定装置去除术;胫骨内固定装置去除术
1974	D07儿童骨科、骨盆外科	2024-10-19	2024-10-28	3561161	邱林弟	女	88Y	股骨转子间骨折	心功能不全;肾功能不全;高血压;房性期前收缩[房性早搏]	治愈	孔建中	余贤斌	余贤斌	股骨骨折闭合复位髓内针内固定术;股骨植骨术
1975	D07儿童骨科、骨盆外科	2024-10-19	2024-10-30	3560585	李俊杰	男	12Y	股骨颈骨折	骨硬化症	好转	张敬东	易先宏	朱瑞博
1976	D07儿童骨科、骨盆外科	2024-10-27	2024-10-30	3561871	陈宣羽	男	5Y	肱骨髁上骨折		治愈	张敬东	闫广奎	朱瑞博	肱骨骨折闭合复位钢针内固定术
1977	D07儿童骨科、骨盆外科	2024-10-26	2024-10-30	3561876	吴登翔	男	11Y	掌骨骨折		好转	张敬东	张敬东	陈栋	掌骨骨折闭合复位钢针内固定术
1978	D07儿童骨科、骨盆外科	2024-10-11	2024-10-30	3561948	金德英	女	82Y	股骨颈骨折	胸椎骨折;腰椎骨折;头皮挫伤;胸腔积液;腰椎退行性病变;胸椎退行性病变;腰骶椎间盘突出;脾大;泌尿道感染;老年性脑萎缩;心功能不全;胆囊结石;肝胆管扩张	治愈	孔建中	余贤斌	余贤斌	人工股骨头置换术;髋关节滑膜切除术;髋轴面，陶瓷与聚乙烯;胸椎骨折球囊扩张成形术;腰椎骨折球囊扩张成形术
1979	D07儿童骨科、骨盆外科	2024-10-21	2024-10-30	3561951	林日盛	男	29Y	尺骨茎突骨折伴桡骨远端骨折	跟骨骨折;精神分裂症;难治性抑郁症	治愈	孔建中	余贤斌	余贤斌	桡骨骨折切开复位钢针内固定术;跟骨骨折切开复位钢板内固定术;关节软骨修复术;石膏绷带固定
1980	D07儿童骨科、骨盆外科	2024-10-21	2024-10-30	3562033	郑林平	女	57Y	尺骨茎突骨折伴桡骨远端骨折	高血压	治愈	孔建中	余贤斌	余贤斌	桡骨骨折切开复位钢板内固定术;关节软骨修复术;桡骨植骨术
1981	D07儿童骨科、骨盆外科	2024-10-27	2024-10-31	3562325	陈振赫	男	4Y	取除骨折内固定装置		其他	张敬东	易先宏	朱瑞博	肱骨内固定装置去除术
1982	D07儿童骨科、骨盆外科	2024-10-29	2024-10-31	3562365	杨光	男	32Y	掌骨骨折	指骨骨折;肾结石;脂肪肝	好转	水小龙	水小龙	徐宏威
1983	D07儿童骨科、骨盆外科	2024-10-22	2024-10-31	3562544	练高垒	男	52Y	距骨骨折	足的其他和未特指部位的脱位;髂骨骨折;跖骨骨折;眶骨骨折;肋骨骨折;头皮裂伤;胸腔积液;上颌骨骨折;脾术后;肝囊肿	好转	翁益民	翁益民	王特	距骨骨折切开复位螺钉内固定术;髂骨骨折切开复位钢板内固定术;关节软骨修复术;踝融合术
1984	D07儿童骨科、骨盆外科	2024-10-27	2024-11-01	3562670	陈雨翔	男	14Y	踝关节骨折		好转	张敬东	易先宏	朱瑞博	踝关节骨折切开复位钢针内固定术
1985	D07儿童骨科、骨盆外科	2024-10-25	2024-11-01	3562758	陈欣妍	女	4Y	肱骨外髁骨折		治愈	张敬东	易先宏	朱瑞博	肱骨骨折切开复位钢针内固定术;关节软骨修复术
1986	D07儿童骨科、骨盆外科	2024-10-31	2024-11-02	3563053	戴朝飞	男	7Y	孟氏骨折		好转	张敬东	易先宏	朱瑞博
1987	D07儿童骨科、骨盆外科	2024-10-26	2024-11-03	3563341	徐舒文	女	4Y	肱骨外髁骨折		好转	张敬东	易先宏	陈栋	肱骨骨折切开复位钢针内固定术;关节软骨修复术
1988	D07儿童骨科、骨盆外科	2024-10-23	2024-11-03	3563344	麻花妹	女	58Y	髌骨骨折	股四头肌腱断裂;肝回声不均;肝囊肿	治愈	孔建中	余贤斌	余贤斌	髌骨骨折切开复位张力带钢丝内固定术;关节软骨修复术;股四头肌成形术
1989	D07儿童骨科、骨盆外科	2024-10-10	2024-11-03	3563352	潘理藩	男	91Y	股骨颈骨折	肺部感染;胸腔积液;多发性脑梗死;高血压;2型糖尿病;肺气肿	治愈	杨雷	应晓洲	谢忠杰	人工股骨头置换术;髋关节滑膜切除术;髋轴面，金属与金属
1990	D07儿童骨科、骨盆外科	2024-10-22	2024-11-03	3563384	洪智轩	男	10Y	肱骨髁上骨折		治愈	张敬东	方明桥	朱瑞博	肱骨骨折切开复位钢针内固定术
1991	D07儿童骨科、骨盆外科	2024-10-22	2024-11-04	3563787	潘诗韵	女	6Y	股骨下端骨折		好转	张敬东	吴宗艺	陈栋	股骨骨折切开复位钢板内固定术
1992	D07儿童骨科、骨盆外科	2024-10-28	2024-11-04	3563830	苏义锦	男	11Y	尺骨远端骨折伴桡骨远端骨折		好转	张敬东	方明桥	陈栋	桡骨骨折切开复位钢针内固定术;尺骨骨折闭合性复位术;石膏绷带固定
1993	D07儿童骨科、骨盆外科	2024-11-01	2024-11-04	3563832	王叙	男	7Y	肱骨髁上骨折		治愈	张敬东	易先宏	朱瑞博	肱骨骨折闭合复位钢针内固定术
1994	D07儿童骨科、骨盆外科	2024-10-31	2024-11-05	3564090	周振威	男	13Y	桡骨远端骨折		好转	张敬东	王伟	陈栋	桡骨骨折闭合复位钢针内固定术
1995	D07儿童骨科、骨盆外科	2024-10-26	2024-11-05	3564093	林泽轩	男	3Y	股骨骨折	上肢浅表损伤;耳浅表损伤;头部浅表损伤;腰背部挫伤;腹腔积液	治愈	张敬东	李玉安	朱瑞博	股骨骨折闭合复位髓内针内固定术
1996	D07儿童骨科、骨盆外科	2024-10-27	2024-11-05	3564168	林家乐	男	6Y	股骨粗隆间骨折		好转	张敬东	吴宗艺	朱瑞博	股骨骨折闭合复位螺钉内固定术
1997	D07儿童骨科、骨盆外科	2024-10-17	2024-11-05	3564169	候彩云	女	69Y	股骨转子间骨折	胫骨下端骨折;外踝骨折;踝关节软骨损伤;肺肿物;脂肪肝;泌尿道感染;2型糖尿病	治愈	孔建中	余贤斌	余贤斌	股骨骨折闭合复位螺钉内固定术;胫骨骨折切开复位螺钉内固定术;踝关节骨折切开复位钢板内固定术;关节软骨修复术;踝融合术
1998	D07儿童骨科、骨盆外科	2024-10-30	2024-11-06	3564557	谢昊翔	男	9Y	肱骨远端骨折	尺骨和桡骨下端均骨折	治愈	张敬东	易先宏	朱瑞博	肱骨骨折闭合复位钢针内固定术;桡骨骨折闭合复位钢针内固定术
[truncated: 13,603 more rows]
