# Supplementary material for: Variable Rate of D-dimer Predicts Venous Thromboembolism in Postoperative Fracture Patients: A Single-Center Retrospective Cohort Study
Source: Research Square preprint supplement (doi:10.21203/rs.3.rs-7878480/v1), 2025-12-09
Supplement: Supplementary file 9 [file c9113da926ac57ee9c022299.xlsx]

## Sheet: Sheet1
			2016	2016		2017	2017		2018	2018		2019	2019		2020	2020		2021	2021
			骨折/血栓	骨折		骨折/血栓	骨折		骨折/血栓	骨折		骨折/血栓	骨折		骨折/血栓	骨折		骨折/血栓	骨折
年龄		男	81	1208		147	1233		236	1214		351	1172		229	1216		156	4932	1200
20-95岁				6105			6317			7906			7772			7830
		合计男		7313			7550			9120			8944			9046			4930	46903
		女	99	830		200	840		339	865		436	868		336	823		203	3960	1613
				4139			4448			5174			5816			5756
		合计女		4969			5288			6039			6684			6579			3960	33519
		高血压	55	2060		142	2449		202	2847		290	3377		207	3060		143	1822
		糖尿病	23	925		58	1077		96	1340		141	1681		96	1501		55	782
		高脂血症-冠心病	1	102		9	122		13	183		18	251		14	203		10	102
		肿瘤	12	256		16	404		55	526		49	627		57	903		39	492
		感染/脓毒血症	34	738		48	908		9	1351		172	1511		183	1606		106	733
		合计	125			273	4960		375	6247		670	7447		557	7273		353	3931
				合并血栓	不合并
				12	256					合并血栓					不合并
				34	738					高血压	糖尿病	高脂血症-冠心病
				16	404					55	23	1			2060	925	102
				48	908					142	58	9			2449	1077	122
				55	526					202	96	13			2847	1340	183
		46903		9	1351					290	141	18			3377	1681	251
		33519		49	627					207	96	14			3060	1501	203
				172	1511					143	55	10			1822	782	102
		80422		57	903				合计	1039	469	65		合计	15615	7306	963
		-2813		183	1606
		77609		39	492
				106	733
			合计	780	10055
	D-二聚体	骨折发生后D-二聚体	VTE发生后D-二聚体		D-VTE发生/骨折发生后				D-无VTE/骨折发生后变异率
	1	7.65	20		2.61438
	2	7.64	38.8		5.07853
	3	3.9	12.66		3.24615
	4	6.52	14.88		2.28221
	5	1.45	3.53		2.43448
	6	0.61	1.46		2.39344
	7	2.7	14.28		5.28889
	8	2.39	6.87		2.87448
	9	2.59	5.7		2.20077
	10	1.09	1.54		1.41284
		8.9	18		2.02247
		2.47	5.65		2.28745
		5.55	7.44		1.34054
		2.81	10.77		3.83274
		5.71	12.06		2.11208
		2.46	5.6		2.27642
		3.28	10.47		3.19207
		4.98	7		1.40562
		4.95	20		4.0404
		2.78	4.78		1.71942
		1.95	6.3		3.23077
		3.62	12.09		3.33978
		5.21	25		4.79846
		5.62	7		1.24555
		9.04	31.7		3.50664
		5.74	7.79		1.35714
		1.65	2.48		1.50303
		1.95	10.64		5.45641
		0.81	2.13		2.62963
		2.52	6.39		2.53571
		1.28	2.72		2.125
		1.79	5.08		2.83799
		2.67	12.4		4.64419
		1.12	1.97		1.75893
		2.37	5.01		2.11392
		1.39	2.9		2.08633
		1.74	8.4		4.82759
		6.12	24		3.92157
		4.18	15.25		3.64833
		9.47	15.13		1.59768
		4.51	6.49		1.43902
		5.78	25.9		4.48097
		1.66	6.9		4.15663
		4.37	7.33		1.67735
		3.31	10.7		3.23263
		1.64	5.59		3.40854
		4.04	15.86		3.92574
		2.4	6.46		2.69167
		1.77	3.88		2.19209
		0.6	5.48		9.13333
		2.29	18.87		8.24017

## Sheet: Sheet2-ROC
Sensitivity	95% CI	Specificity		youden	Sensitivity	95% CI	Specificity		#VALUE!	youden			Cutoff >	Sensitivity	95% CI	Specificity	#VALUE!	youden
0.9804	0.8955 to 0.9995	0	1.9804	-0.0196	1	0.9302 to 1.000	0.0588		0.0588				0.85	1	0.9302 to 1.000	0.0588	0.0588
0.9608	0.8654 to 0.9952	0	1.9608	-0.0392	1	0.9302 to 1.000	0.1176		0.1176				0.95	1	0.9302 to 1.000	0.1176	0.1176
0.9412	0.8376 to 0.9877	0	1.9412	-0.0588	1	0.9302 to 1.000	0.2941		0.2941				1.05	1	0.9302 to 1.000	0.2941	0.2941
0.9216	0.8112 to 0.9782	0	1.9216	-0.0784	1	0.9302 to 1.000	0.3725		0.3725				1.173	1	0.9302 to 1.000	0.3725	0.3725
0.902	0.7859 to 0.9674	0	1.902	-0.098	0.9804	0.8955 to 0.9995	0.3725		0.3529				1.273	0.9804	0.8955 to 0.9995	0.3725	0.3529
0.8824	0.7613 to 0.9556	0	1.8824	-0.1176	0.9804	0.8955 to 0.9995	0.451		0.4314				1.32	0.9804	0.8955 to 0.9995	0.451	0.4314
0.8627	0.7374 to 0.9430	0	1.8627	-0.1373	0.9608	0.8654 to 0.9952	0.451		0.4118				1.349	0.9608	0.8654 to 0.9952	0.451	0.4118
0.8431	0.7141 to 0.9298	0	1.8431	-0.1569	0.9412	0.8376 to 0.9877	0.451		0.3922				1.381	0.9412	0.8376 to 0.9877	0.451	0.3922
0.8431	0.7141 to 0.9298	0.0196	1.8235	-0.1373	0.9216	0.8112 to 0.9782	0.451		0.3726				1.409	0.9216	0.8112 to 0.9782	0.451	0.3726
0.8431	0.7141 to 0.9298	0.0392	1.8039	-0.1177	0.902	0.7859 to 0.9674	0.451		0.353				1.426	0.902	0.7859 to 0.9674	0.451	0.353
0.8235	0.6913 to 0.9160	0.0392	1.7843	-0.1373	0.8824	0.7613 to 0.9556	0.451		0.3334				1.47	0.8824	0.7613 to 0.9556	0.451	0.3334
0.8039	0.6688 to 0.9018	0.0392	1.7647	-0.1569	0.8824	0.7613 to 0.9556	0.5098		0.3922				1.502	0.8824	0.7613 to 0.9556	0.5098	0.3922
0.7843	0.6468 to 0.8871	0.0392	1.7451	-0.1765	0.8627	0.7374 to 0.9430	0.5098		0.3725				1.55	0.8627	0.7374 to 0.9430	0.5098	0.3725
0.7647	0.6251 to 0.8721	0.0392	1.7255	-0.1961	0.8431	0.7141 to 0.9298	0.5098		0.3529				1.599	0.8431	0.7141 to 0.9298	0.5098	0.3529
0.7451	0.6037 to 0.8567	0.0392	1.7059	-0.2157	0.8431	0.7141 to 0.9298	0.5686		0.4117				1.639	0.8431	0.7141 to 0.9298	0.5686	0.4117
0.7255	0.5826 to 0.8411	0.0392	1.6863	-0.2353	0.8235	0.6913 to 0.9160	0.5686		0.3921				1.689	0.8235	0.6913 to 0.9160	0.5686	0.3921
0.6863	0.5411 to 0.8089	0.0392	1.6471	-0.2745	0.8235	0.6913 to 0.9160	0.6275		0.451				1.71	0.8235	0.6913 to 0.9160	0.6275	0.451
0.6863	0.5411 to 0.8089	0.0588	1.6275	-0.2549	0.8039	0.6688 to 0.9018	0.6275		0.4314				1.739	0.8039	0.6688 to 0.9018	0.6275	0.4314
0.6863	0.5411 to 0.8089	0.0784	1.6079	-0.2353	0.7843	0.6468 to 0.8871	0.6275		0.4118				1.879	0.7843	0.6468 to 0.8871	0.6275	0.4118
0.6667	0.5208 to 0.7924	0.0784	1.5883	-0.2549	0.7843	0.6468 to 0.8871	0.7059		0.4902				2.011	0.7843	0.6468 to 0.8871	0.7059	0.4902
0.6471	0.5007 to 0.7757	0.0784	1.5687	-0.2745	0.7647	0.6251 to 0.8721	0.7059		0.4706				2.054	0.7647	0.6251 to 0.8721	0.7059	0.4706
0.6275	0.4808 to 0.7587	0.0784	1.5491	-0.2941	0.7451	0.6037 to 0.8567	0.7059		0.451				2.093	0.7451	0.6037 to 0.8567	0.7059	0.451
0.6078	0.4611 to 0.7416	0.0784	1.5294	-0.3138	0.7451	0.6037 to 0.8567	0.7255		0.4706				2.106	0.7451	0.6037 to 0.8567	0.7255	0.4706
0.5882	0.4417 to 0.7242	0.0784	1.5098	-0.3334	0.7255	0.5826 to 0.8411	0.7255		0.451				2.113	0.7255	0.5826 to 0.8411	0.7255	0.451
0.5686	0.4225 to 0.7065	0.0784	1.4902	-0.353	0.7059	0.5617 to 0.8251	0.7255		0.4314				2.119	0.7059	0.5617 to 0.8251	0.7255	0.4314
0.5686	0.4225 to 0.7065	0.098	1.4706	-0.3334	0.6863	0.5411 to 0.8089	0.7255		0.4118				2.159	0.6863	0.5411 to 0.8089	0.7255	0.4118
0.549	0.4034 to 0.6887	0.098	1.451	-0.353	0.6667	0.5208 to 0.7924	0.7255		0.3922				2.196	0.6667	0.5208 to 0.7924	0.7255	0.3922
0.5294	0.3846 to 0.6707	0.098	1.4314	-0.3726	0.6667	0.5208 to 0.7924	0.7843		0.451				2.2	0.6667	0.5208 to 0.7924	0.7843	0.451
0.5098	0.3660 to 0.6525	0.098	1.4118	-0.3922	0.6471	0.5007 to 0.7757	0.7843		0.4314				2.239	0.6471	0.5007 to 0.7757	0.7843	0.4314
0.4902	0.3475 to 0.6340	0.098	1.3922	-0.4118	0.6275	0.4808 to 0.7587	0.7843		0.4118				2.279	0.6275	0.4808 to 0.7587	0.7843	0.4118
0.4902	0.3475 to 0.6340	0.1176	1.3726	-0.3922	0.6078	0.4611 to 0.7416	0.7843		0.3921				2.285	0.6078	0.4611 to 0.7416	0.7843	0.3921
0.4706	0.3293 to 0.6154	0.1176	1.353	-0.4118	0.5882	0.4417 to 0.7242	0.7843		0.3725				2.34	0.5882	0.4417 to 0.7242	0.7843	0.3725
0.451	0.3113 to 0.5966	0.1176	1.3334	-0.4314	0.5686	0.4225 to 0.7065	0.7843		0.3529				2.414	0.5686	0.4225 to 0.7065	0.7843	0.3529
0.451	0.3113 to 0.5966	0.1373	1.3137	-0.4117	0.549	0.4034 to 0.6887	0.7843		0.3333				2.467	0.549	0.4034 to 0.6887	0.7843	0.3333
0.4314	0.2935 to 0.5775	0.1373	1.2941	-0.4313	0.549	0.4034 to 0.6887	0.8431		0.3921				2.518	0.549	0.4034 to 0.6887	0.8431	0.3921
0.4118	0.2758 to 0.5583	0.1373	1.2745	-0.4509	0.5294	0.3846 to 0.6707	0.8431		0.3725				2.575	0.5294	0.3846 to 0.6707	0.8431	0.3725
0.4118	0.2758 to 0.5583	0.1569	1.2549	-0.4313	0.5098	0.3660 to 0.6525	0.8431		0.3529				2.622	0.5098	0.3660 to 0.6525	0.8431	0.3529
0.3922	0.2584 to 0.5389	0.1569	1.2353	-0.4509	0.4902	0.3475 to 0.6340	0.8431		0.3333				2.661	0.4902	0.3475 to 0.6340	0.8431	0.3333
0.3922	0.2584 to 0.5389	0.1765	1.2157	-0.4313	0.4706	0.3293 to 0.6154	0.8431		0.3137				2.746	0.4706	0.3293 to 0.6154	0.8431	0.3137
0.3725	0.2413 to 0.5192	0.1765	1.196	-0.451	0.4706	0.3293 to 0.6154	0.8627		0.3333				2.819	0.4706	0.3293 to 0.6154	0.8627	0.3333
0.3529	0.2243 to 0.4993	0.1765	1.1764	-0.4706	0.451	0.3113 to 0.5966	0.8627		0.3137				2.856	0.451	0.3113 to 0.5966	0.8627	0.3137
0.3333	0.2076 to 0.4792	0.1765	1.1568	-0.4902	0.4314	0.2935 to 0.5775	0.8627		0.2941				3.033	0.4314	0.2935 to 0.5775	0.8627	0.2941
0.3137	0.1911 to 0.4589	0.1765	1.1372	-0.5098	0.4118	0.2758 to 0.5583	0.8627		0.2745				3.211	0.4118	0.2758 to 0.5583	0.8627	0.2745
0.2941	0.1749 to 0.4383	0.1765	1.1176	-0.5294	0.3922	0.2584 to 0.5389	0.8627		0.2549				3.232	0.3922	0.2584 to 0.5389	0.8627	0.2549
0.2941	0.1749 to 0.4383	0.1961	1.098	-0.5098	0.3725	0.2413 to 0.5192	0.8627		0.2352				3.239	0.3725	0.2413 to 0.5192	0.8627	0.2352
0.2745	0.1589 to 0.4174	0.1961	1.0784	-0.5294	0.3529	0.2243 to 0.4993	0.8627		0.2156				3.293	0.3529	0.2243 to 0.4993	0.8627	0.2156
0.2549	0.1433 to 0.3963	0.1961	1.0588	-0.549	0.3333	0.2076 to 0.4792	0.8627		0.196				3.374	0.3333	0.2076 to 0.4792	0.8627	0.196
0.2549	0.1433 to 0.3963	0.2157	1.0392	-0.5294	0.3137	0.1911 to 0.4589	0.8627		0.1764				3.458	0.3137	0.1911 to 0.4589	0.8627	0.1764
0.2549	0.1433 to 0.3963	0.2353	1.0196	-0.5098	0.2941	0.1749 to 0.4383	0.8627		0.1568				3.577	0.2941	0.1749 to 0.4383	0.8627	0.1568
0.2353	0.1279 to 0.3749	0.2353	1	-0.5294	0.2745	0.1589 to 0.4174	0.8627		0.1372				3.741	0.2745	0.1589 to 0.4174	0.8627	0.1372
0.2353	0.1279 to 0.3749	0.2549	0.9804	-0.5098	0.2549	0.1433 to 0.3963	0.8627		0.1176				3.877	0.2549	0.1433 to 0.3963	0.8627	0.1176
0.2157	0.1129 to 0.3532	0.2549	0.9608	-0.5294	0.2353	0.1279 to 0.3749	0.8627		0.098				3.924	0.2353	0.1279 to 0.3749	0.8627	0.098
0.2157	0.1129 to 0.3532	0.2745	0.9412	-0.5098	0.2157	0.1129 to 0.3532	0.8627		0.0784				3.963	0.2157	0.1129 to 0.3532	0.8627	0.0784
0.2157	0.1129 to 0.3532	0.2941	0.9216	-0.4902	0.2157	0.1129 to 0.3532	0.9216		0.1373				4.02	0.2157	0.1129 to 0.3532	0.9216	0.1373
0.1961	0.09824 to 0.3312	0.2941	0.902	-0.5098	0.1961	0.09824 to 0.3312	0.9216		0.1177				4.099	0.1961	0.09824 to 0.3312	0.9216	0.1177
0.1961	0.09824 to 0.3312	0.3137	0.8824	-0.4902	0.1765	0.08401 to 0.3087	0.9216		0.0981				4.319	0.1765	0.08401 to 0.3087	0.9216	0.0981
0.1961	0.09824 to 0.3312	0.3333	0.8628	-0.4706	0.1569	0.07024 to 0.2859	0.9216		0.0785				4.563	0.1569	0.07024 to 0.2859	0.9216	0.0785
0.1765	0.08401 to 0.3087	0.3333	0.8432	-0.4902	0.1373	0.05701 to 0.2626	0.9216		0.0589				4.721	0.1373	0.05701 to 0.2626	0.9216	0.0589
0.1569	0.07024 to 0.2859	0.3333	0.8236	-0.5098	0.1176	0.04442 to 0.2387	0.9216		0.0392				4.813	0.1176	0.04442 to 0.2387	0.9216	0.0392
0.1373	0.05701 to 0.2626	0.3333	0.804	-0.5294	0.098	0.03261 to 0.2141	0.9216		0.0196				4.914	0.098	0.03261 to 0.2141	0.9216	0.0196
0.1176	0.04442 to 0.2387	0.3333	0.7843	-0.5491	0.098	0.03261 to 0.2141	1		0.098				5.039	0.098	0.03261 to 0.2141	1	0.098
0.1176	0.04442 to 0.2387	0.3529	0.7647	-0.5295	0.0784	0.02178 to 0.1888	1		0.0784				5.184	0.0784	0.02178 to 0.1888	1	0.0784
0.1176	0.04442 to 0.2387	0.3725	0.7451	-0.5099	0.0588	0.01230 to 0.1624	1		0.0588				5.373	0.0588	0.01230 to 0.1624	1	0.0588
0.1176	0.04442 to 0.2387	0.3922	0.7254	-0.4902	0.0392	0.004785 to 0.1346	1		0.0392				6.848	0.0392	0.004785 to 0.1346	1	0.0392
0.1176	0.04442 to 0.2387	0.4118	0.7058	-0.4706	0.0196	0.000496 to 0.1045	1		0.0196				8.687	0.0196	0.000496 to 0.1045	1	0.0196
0.098	0.03261 to 0.2141	0.4118	0.6862	-0.4902
0.098	0.03261 to 0.2141	0.4314	0.6666	-0.4706
0.098	0.03261 to 0.2141	0.451	0.647	-0.451
0.098	0.03261 to 0.2141	0.4902	0.6078	-0.4118
0.098	0.03261 to 0.2141	0.5098	0.5882	-0.3922
0.098	0.03261 to 0.2141	0.5294	0.5686	-0.3726
0.0784	0.02178 to 0.1888	0.5294	0.549	-0.3922
0.0588	0.01230 to 0.1624	0.5294	0.5294	-0.4118
0.0588	0.01230 to 0.1624	0.549	0.5098	-0.3922
0.0588	0.01230 to 0.1624	0.5686	0.4902	-0.3726
0.0392	0.004785 to 0.1346	0.5686	0.4706	-0.3922
0.0196	0.000496 to 0.1045	0.5686	0.451	-0.4118
0	0.0 to 0.06978	0.5686	0.4314	-0.4314
0	0.0 to 0.06978	0.5882	0.4118	-0.4118
0	0.0 to 0.06978	0.6078	0.3922	-0.3922
0	0.0 to 0.06978	0.6275	0.3725	-0.3725
0	0.0 to 0.06978	0.6471	0.3529	-0.3529
0	0.0 to 0.06978	0.6667	0.3333	-0.3333
0	0.0 to 0.06978	0.6863	0.3137	-0.3137
0	0.0 to 0.06978	0.7059	0.2941	-0.2941
0	0.0 to 0.06978	0.7255	0.2745	-0.2745
0	0.0 to 0.06978	0.7451	0.2549	-0.2549
0	0.0 to 0.06978	0.7647	0.2353	-0.2353
0	0.0 to 0.06978	0.7843	0.2157	-0.2157
0	0.0 to 0.06978	0.8039	0.1961	-0.1961
0	0.0 to 0.06978	0.8235	0.1765	-0.1765
0	0.0 to 0.06978	0.8431	0.1569	-0.1569
0	0.0 to 0.06978	0.8627	0.1373	-0.1373
0	0.0 to 0.06978	0.902	0.098	-0.098
0	0.0 to 0.06978	0.9216	0.0784	-0.0784
0	0.0 to 0.06978	0.9412	0.0588	-0.0588
0	0.0 to 0.06978	0.9608	0.0392	-0.0392
0	0.0 to 0.06978	0.9804	0.0196	-0.0196

## Sheet: Sheet4-数据
D-二聚体	骨折发生后D-二聚体-1	有VTE发生后D-二聚体	VTE=1	有VTE发生/骨折发生后DD变异率	VTE年龄	VTE性别女=1，男=2	VTE骨折类型	骨折术后3-7天组别1/2/3/4			骨折发生后D-二聚体-2		无VTE发生D-二聚体	nonVTE=0	无VTE/骨折发生后DD变异率	无VTE年龄	无VTE性别女=1，男=2	无VTE骨折类型	骨折术后3-7天组别1/2/3/4				骨折合并VTE	骨折非合并VTE
1	7.65	20	0	2.61438	95	1		1			3.36		2.78	1	0.827381	30	1	1	0			男	1200	45703
2	7.64	38.8	0	5.07853	70	1		2			2.15		1.62	1	0.753488	30	1	2	0			女	1613	31906
3	3.9	12.66	0	3.24615	66	1		1			5.62		7.33	1	1.30427	40	1	3	0
4	6.52	14.88	0	2.28221	82	1		2			10.27		6.25	1	0.608569	50	1	2	0			ORIF	680	30500
5	1.45	3.53	0	2.43448	50	1		1			1.3		1.62	1	1.24615	43	1	4	0			CRIF	200	5260
6	0.61	1.46	0	2.39344	26	1		3			1.5		0.96	1	0.64	28	1	1	0
7	2.7	14.28	0	5.28889	56	1		2			1.85		1.62	1	0.875676	33	1	3	0			术前	323	0.114824
8	2.39	6.87	0	2.87448	81	1		2			0.65		0.36	1	0.553846	38	1	4	0			术后1-3	755	0.268397
9	2.59	5.7	0	2.20077	72	1		3			0.3		0.62	1	2.06667	61	1	2	0			术后>3-7	1292	0.459296
10	1.09	1.54	0	1.41284	75	1		3			0.89		2.3	1	2.58427	76	1	3	0			术后>7天以上	443	0.157483
11	8.9	18	0	2.02247	59	1		3			2.21		1.26	1	0.570136	28.0952	1	4	0				2813
12	2.47	5.65	0	2.28745	55	1		2			2.31		1.99	1	0.861472	26.1905	1	3	0					1
13	5.55	7.44	0	1.34054	47	1		4			1.26		1.36	1	1.07937	22.381	1	2	0
14	2.81	10.77	0	3.83274	88	1		4			0.66		0.55	1	0.833333	41.9048	1	1	0
15	5.71	12.06	0	2.11208	70	1		3			0.3		0.38	1	1.26667	33.3333	1	1	0
16	2.46	5.6	0	2.27642	60	1		3			0.69		0.96	1	1.3913	28.5714	1	2	0
17	3.28	10.47	0	3.19207	56	1		2			2.31		1.69	1	0.731602	26.6667	1	3	0
18	4.98	7	0	1.40562	56	1		1			1.26		2.35	1	1.86508	26.6667	1	2	0
19	4.95	20	0	4.0404	86	1		3			1.64		1.99	1	1.21341	40.9524	1	4	0
20	2.78	4.78	0	1.71942	73	1		4			1.59		1.26	1	0.792453	34.7619	1	1	0
21	1.95	6.3	0	3.23077	28	1		3			1.8		1.23	1	0.683333	13.3333	1	3	0
22	3.62	12.09	0	3.33978	61	1		4			3.34		5.33	1	1.59581	29.0476	1	4	0
23	5.21	25	0	4.79846	44	1		1			0.62		0.61	1	0.983871	20.9524	1	2	0
24	5.62	7	0	1.24555	26	1		2			3.68		3.65	1	0.991848	12.381	1	3	0
25	9.04	31.7	0	3.50664	36	1		1			8.26		5.62	1	0.680387	17.1429	1	4	0
26	5.74	7.79	0	1.35714	38	1		2			7.25		3.26	1	0.449655	18.0952	1	3	0
27	1.65	2.48	0	1.50303	48	1		1			6.36		4.2	1	0.660377	22.8571	1	2	0
28	1.95	10.64	0	5.45641	56	1		3			5.62		3.65	1	0.649466	26.6667	1	1	0
29	0.81	2.13	0	2.62963	51	1		2			9.65		8.26	1	0.855959	24.2857	1	2	0
30	2.52	6.39	0	2.53571	86	1		2			2.63		3.01	1	1.14449	40.9524	1	3	0
31	1.28	2.72	0	2.125	78	1		3			4.26		2.35	1	0.551643	55.3191	1	2	0
32	1.79	5.08	0	2.83799	72	1		3			3.32		4.41	1	1.32831	51.0638	1	4	0
33	2.67	12.4	0	4.64419	71	1		3			3.64		2.32	1	0.637363	50.3546	1	1	0
34	1.12	1.97	0	1.75893	76	1		2			3.98		4.26	1	1.07035	53.9007	1	3	0
35	2.37	5.01	0	2.11392	81	1		4			3.26		3.52	1	1.07975	57.4468	1	4	0
36	1.39	2.9	0	2.08633	64	1		4			3.11		3.29	1	1.05788	45.3901	1	2	0
37	1.74	8.4	0	4.82759	62	1		3			3.65		3.98	1	1.09041	43.9716	1	3	0
38	6.12	24	0	3.92157	61	1		3			4.66		3.59	1	0.770386	43.2624	1	4	0
39	4.18	15.25	0	3.64833	58	1		2			4.26		3.29	1	0.7723	41.1348	1	3	0
40	9.47	15.13	0	1.59768	59	1		1			4.25		2.39	1	0.562353	41.844	1	2	0
41	4.51	6.49	0	1.43902	55	1		3			4.98		2.2	1	0.441767	39.0071	1	1	0
42	5.78	25.9	0	4.48097	60	1		4			4.68		1.89	1	0.403846	42.5532	1	1	0
43	1.66	6.9	0	4.15663	44	1		3			4.87		6.26	1	1.28542	31.2057	1	2	0
44	4.37	7.33	0	1.67735	46	1		4			4.01		7.02	1	1.75062	32.6241	1	3	0
45	3.31	10.7	0	3.23263	77	1		1			4.1		7.12	1	1.73659	54.6099	1	2	0
46	1.64	5.59	0	3.40854	39	1		2			4.7		3.29	1	0.7	27.6596	1	4	0
47	4.04	15.86	0	3.92574	33	1		1			4.29		4.11	1	0.958042	23.4043	1	1	0
48	2.4	6.46	0	2.69167	62	1		2			5.1		4.26	1	0.835294	43.9716	1	3	0
49	1.77	3.88	0	2.19209	68	1		1			5.29		5.29	1	1	48.227	1	4	0
50	0.6	5.48	0	9.13333	83	1		3			5.34		5.19	1	0.97191	58.8652	1	2	0
51	2.29	18.87	0	8.24017	61	1		2			5.29		5.62	1	1.06238	43.2624	1	3	0
52	6.26	15.62	0	2.49521	69	1		2			5.85		6.33	1	1.08205	48.9362	1	4	0
53	6.23	6.99	0	1.12199	86	1		3			5.666		4.26	1	0.751853	60.9929	1	3	0
54	6.59	5.98	0	0.907436	42	1		3			5.29		3.98	1	0.752363	29.7872	1	2	0
55	6.29	9.88	0	1.57075	75	1		3			5.01		6.96	1	1.38922	53.1915	1	1	0
56	6.02	15	0	2.49169	59	1		2			5.05		8.25	1	1.63366	41.844	1	4	0
57	6.65	20	0	3.00752	58	1		4			5.92		9.26	1	1.56419	41.1348	1	3	0
58	6.88	16.32	0	2.37209	52	1		4			5.55		7.62	1	1.37297	36.8794	1	2	0
59	6.92	9.28	0	1.34104	51	1		3			5.48		5.26	1	0.959854	36.1702	1	1	0
60	6.28	12.26	0	1.95223	66	1		3			5.47		4.26	1	0.778793	46.8085	1	1	0
61	6.21	19.55	0	3.14815	68	1		2			5.25		6.95	1	1.32381	48.227	1	2	0
62	6.49	16.92	0	2.60709	75	1		1			2.29		2.67	1	1.16594	53.1915	1	3	0
63	6.29	8.29	0	1.31797	59	1		2			2.64		1.68	1	0.636364	41.844	1	2	0
64	7.89	11.33	0	1.43599	91	1		1			2.69		2.02	1	0.750929	64.539	1	4	0
65	7.29	10.36	0	1.42112	92	1		2			2.03		3.26	1	1.60591	65.2482	1	1	0
66	7.01	9.88	0	1.40942	55	1		1			2.95		2.39	1	0.810169	39.0071	1	3	0
67	7.05	10.29	0	1.45957	58	1		3			2.85		2.87	1	1.00702	41.1348	1	4	0
68	7.55	6.29	0	0.833113	56	1		2			2.74		2.59	1	0.945255	39.7163	1	2	0
69	7.42	7.09	0	0.955526	49	1		2			2.16		2.94	1	1.36111	34.7518	1	3	0
70	7	8.19	0	1.17	36	1		3			2.68		2.9	1	1.08209	25.5319	1	4	0
71	10.26	16.29	0	1.58772	37	1		3			1.26		0.99	1	0.785714	26.2411	1	3	0
72	11.25	16.29	0	1.448	58	1		3			1.29		1.5	1	1.16279	41.1348	1	2	0
73	11.92	20	0	1.67785	52	1		2			1.33		1.01	1	0.759398	36.8794	1	1	0
74	12.63	18.26	0	1.44576	50	1		4			1.49		1.96	1	1.31544	35.461	1	2	0
75	11.65	16.23	0	1.39313	60	1		4			1.52		3.22	1	2.11842	42.5532	1	3	0
76	12.69	15.22	0	1.19937	71	1		3			1.59		2.13	1	1.33962	50.3546	1	2	0
77	13.96	19.62	0	1.40544	59	1		3			1.96		1.82	1	0.928571	41.844	1	4	0
78	15.26	15.01	0	0.983617	57	1		2			1.87		1.98	1	1.05882	40.4255	1	1	0
79	18.29	20	0	1.09349	52	1		1			1.01		0.61	1	0.60396	36.8794	1	3	0
80	15.92	19.25	0	1.20917	59	1		3			1.95		3.26	1	1.67179	41.844	1	4	0
81	18.62	20	0	1.07411	58	1		4			1.87		4.02	1	2.14973	41.1348	1	2	0
82	18.29	16.26	0	0.88901	72	1		3			1.77		3.62	1	2.0452	51.0638	1	3	0
83	16.28	20	0	1.2285	76	1		4			1.72		2.51	1	1.4593	53.9007	1	1	0
84	10.99	16.26	0	1.47953	77	1		1			0.66		1.02	1	1.54545	54.6099	1	2	0
85	10.22	18.29	0	1.78963	82	1		3			0.35		0.62	1	1.77143	58.156	1	3	0
86	10.65	16.22	0	1.523	80	1		2			0.51		0.92	1	1.80392	56.7376	1	2	0
87	10.62	13.62	0	1.28249	38	1		2			0.69		0.51	1	0.73913	26.9504	1	4	0
88	9.26	11.25	0	1.2149	42	1		3			0.58		0.48	1	0.827586	29.7872	1	1	0
89	9.28	18.26	0	1.96767	49	1		3			0.67		1.15	1	1.71642	34.7518	1	3	0
90	9.16	12.22	0	1.33406	50	1		3			0.93		1.02	1	1.09677	35.461	1	4	0
91	9.18	8.92	0	0.971678	57	1		2			0.46		0.69	1	1.5	40.4255	1	2	0
92	9.62	16.28	0	1.69231	55	1		4			6.32		6.98	1	1.10443	39.0071	1	3	0
93	6.29	13.96	0	2.2194	66	1		4			6.24		3.26	1	0.522436	46.8085	1	4	0
94	8.29	15.29	0	1.84439	47	1		3			6.56		2.26	1	0.344512	33.3333	1	3	0
95	8.21	16.92	0	2.0609	62	1		3			6.14		9.26	1	1.50814	43.9716	1	2	0
96	8.67	18.02	0	2.07843	65	1		2			6.42		6.28	1	0.978193	46.0993	1	1	0
97	8.55	20	0	2.33918	49	1		1			6.87		6.21	1	0.90393	34.7518	1	1	0
98	1.96	3.01	0	1.53571	45	1		2			6.92		6.6	1	0.953757	31.9149	1	2	0
99	2.02	5.26	0	2.60396	41	1		1			6.51		4.52	1	0.694316	29.078	1	3	0
100	3.21	3.26	0	1.01558	55	1		2			6.28		5.62	1	0.894904	39.0071	1	2	0
101	1.88	4.21	0	2.23936	58	1		1			6.02		5.29	1	0.878738	41.1348	1	4	0
102	3.62	4.28	0	1.18232	59	1		3			6.09		2.36	1	0.387521	41.844	1	1	0
103	2.22	4.29	0	1.93243	62	1		2			6.59		9.85	1	1.49469	43.9716	1	3	0
104	2.88	5.29	0	1.83681	61	1		2			6.87		9.28	1	1.3508	43.2624	1	4	0
105	3.29	8.62	0	2.62006	63	1		3			6.72		8.27	1	1.23065	44.6809	1	2	0
106	1.29	6.26	0	4.85271	84	1		3			6.81		6.28	1	0.922173	59.5745	1	3	0
107	3.92	10.29	0	2.625	66	1		3			6.29		7.05	1	1.12083	46.8085	1	4	0
108	1.29	7.2	0	5.5814	82	1		1			7.87		6.18	1	0.78526	58.156	1	3	0
109	2.22	3.21	0	1.44595	58	1		2			7.98		5.21	1	0.652882	41.1348	1	2	0
110	2.96	3.29	0	1.11149	78	1		1			7.06		5.26	1	0.745042	55.3191	1	1	0
111	2.55	2.99	0	1.17255	79	1		2			7.51		5.92	1	0.788282	56.0284	1	2	0
112	2.87	4.69	0	1.63415	75	1		1			7.62		4.59	1	0.602362	53.1915	1	3	0
113	1.68	3.28	0	1.95238	81	1		3			7.78		9.86	1	1.26735	57.4468	1	2	0
114	1.51	4.26	0	2.82119	82	1		2			7.95		6.65	1	0.836478	58.156	1	4	0
115	1.62	7.26	0	4.48148	81	1		2			7.21		8.26	1	1.14563	57.4468	1	1	0
116	1.99	5.62	0	2.82412	77	1		3			7.05		8.18	1	1.16028	54.6099	1	3	0
117	3.26	6.18	0	1.89571	72	1		3			10.36		16.6	1	1.60232	51.0638	1	4	0
118	3.88	6.66	0	1.71649	66	1		3			10.62		16.92	1	1.59322	46.8085	1	2	0
119	3.01	6.01	0	1.99668	62	1		2			10.25		20	1	1.95122	43.9716	1	3	0
120	2.51	6.29	0	2.50598	68	1		4			9.21		16.22	1	1.76113	48.227	1	4	0
121	1.28	6.28	0	4.90625	69	1		4			8.26		19	1	2.30024	48.9362	1	3	0
122	1.62	6.18	0	3.81481	69	1		3			8.21		6.26	1	0.762485	48.9362	1	2	0
123	1.29	3.02	0	2.34109	78	1		3			7.26		8.26	1	1.13774	55.3191	1	1	0
124	0.87	2.01	0	2.31034	79	1		2			7.01		7.29	1	1.03994	56.0284	1	1	0
125	0.69	1.01	0	1.46377	52	1		1			8.2		9.29	1	1.13293	36.8794	1	2	0
126	2.62	3.52	0	1.34351	58	1		3			9.26		11.29	1	1.21922	41.1348	1	3	0
127	2.85	3.9	0	1.36842	59	1		4			11.29		16.29	1	1.44287	41.844	1	2	0
128	2.99	6.2	0	2.07358	40	1		3			13		16.25	1	1.25	28.3688	1	4	0
129	2.01	4.11	0	2.04478	38	1		4			2.9		6.22	1	2.14483	26.9504	1	1	0
130	3.29	6.25	0	1.8997	59	1		1			16.29		13.22	1	0.811541	41.844	1	3	0
131	3.27	6.06	0	1.85321	55	1		2			10.26		15.01	1	1.46296	39.0071	1	4	0
132	4.26	9.65	0	2.26526	66	1		1			8.26		6.26	1	0.757869	46.8085	1	2	0
133	4.28	11.22	0	2.6215	61	1		2			5.29		6.28	1	1.18715	43.2624	1	3	0
134	4.62	16.26	0	3.51948	86	1		1			9.26		16.26	1	1.75594	60.9929	1	4	0
135	4.5	9.52	0	2.11556	72	1		3			8.26		9.28	1	1.12349	51.0638	1	3	0
136	4.01	8.16	0	2.03491	73	1		2			3.62		10.26	1	2.83425	51.773	1	2	0
137	3.28	6.28	0	1.91463	77	1		2			2.26		3.26	1	1.44248	54.6099	1	1	0
138	3.69	5.02	0	1.36043	51	1		3			1.08		2.98	1	2.75926	36.1702	1	4	0
139	3.22	6.92	0	2.14907	56	1		3			6.26		3.62	1	0.578275	39.7163	1	3	0
140	2.36	9.28	0	3.9322	88	1		3			6.33		2.69	1	0.424961	62.4113	1	2	0
141	2.98	11.26	0	3.77852	78	1		2			6.95		3.01	1	0.433094	55.3191	1	1	0
142	3.65	16.25	0	4.45205	75	1		4			5.26		6.35	1	1.20722	53.1915	1	1	0
143	4.26	16.92	0	3.97183	80	1		4			4.26		3.29	1	0.7723	56.7376	1	2	0
144	5.26	20	0	3.80228	69	1		3			4.21		6.25	1	1.48456	48.9362	1	3	0
145	5.16	20	0	3.87597	78	1		3			4.26		5.88	1	1.38028	55.3191	1	2	0
146	5.55	18.23	0	3.28468	65	1		2			4.55		4.88	1	1.07253	46.0993	1	4	0
147	6.01	16.26	0	2.70549	68	1		1			6.26		3.99	1	0.63738	48.227	1	1	0
148	6.25	9.62	0	1.5392	72	1		3			3.62		3.59	1	0.991713	51.0638	1	3	0
149	6.52	9.01	0	1.3819	58	1		4			3.88		6.65	1	1.71392	41.1348	1	4	0
150	6.31	8.29	0	1.31379	51	1		3			3.87		5.29	1	1.36693	36.1702	1	2	0
151	6.98	18.29	0	2.62034	75	1		4			3.86		3.87	1	1.00259	53.1915	2	3	0
152	3.29	9.66	0	2.93617	72	1		1			3.58		4.59	1	1.28212	51.0638	2	4	0
153	11.2	20	0	1.78571	65	1		2			4.26		9.26	1	2.17371	46.0993	2	3	0
154	9.32	8.29	0	0.889485	59	1		1			4.88		13.25	1	2.71516	41.844	2	2	0
155	8.26	9.29	0	1.1247	60	1		2			5.26		15.21	1	2.89163	42.5532	2	1	0
156	8.8	9.9	0	1.125	66	1		1			5.87		13.29	1	2.26405	46.8085	2	2	0
157	8.29	15.02	0	1.81182	65	1		3			6.01		9.29	1	1.54576	46.0993	2	3	0
158	6.37	6.29	0	0.987441	52	1		2			4.25		4.69	1	1.10353	36.8794	2	1	0
159	7.29	8.99	0	1.2332	76	1		2			3.29		3.29	1	1	53.9007	2	2	0
160	7.86	12.28	0	1.56234	75	1		3			3.87		5.99	1	1.5478	53.1915	2	3	0
161	8.29	16.29	0	1.96502	61	1		3			3.46		2.97	1	0.858382	43.2624	2	2	0
162	7.99	20	0	2.50313	82	1		3			3.33		6.29	1	1.88889	58.156	2	4	0
163	8.29	19.22	0	2.31846	58	1		1			3.99		6.87	1	1.7218	41.1348	2	1	0
164	8.29	19.63	0	2.36791	69	1		2			4.65		6.49	1	1.3957	48.9362	2	3	0
165	4.82	16.29	0	3.37967	63	1		1			4.29		5.29	1	1.2331	44.6809	2	4	0
166	6.29	18.29	0	2.90779	63	1		2			4.88		6.29	1	1.28893	44.6809	2	2	0
167	9.59	19.26	0	2.00834	35	1		1			4.19		10.23	1	2.44153	24.8227	2	3	0
168	6.87	16.29	0	2.37118	59	1		3			4.01		9.88	1	2.46384	41.844	2	4	0
169	4.29	15.25	0	3.55478	79	1		2			1.09		3.29	1	3.01835	56.0284	2	3	0
170	6.58	16.29	0	2.47568	51	1		2			2.09		6.88	1	3.29187	36.1702	2	2	0
171	7.26	19.22	0	2.64738	75	1		3			2.88		6.49	1	2.25347	53.1915	2	1	0
172	5.68	16.22	0	2.85563	57	1		3			2.46		5.29	1	2.15041	40.4255	2	1	0
173	4.96	16.29	0	3.28427	59	1		3			2.19		1.29	1	0.589041	41.844	2	2	0
174	6.29	19	0	3.02067	80	1		2			6.21		3.29	1	0.529791	56.7376	2	3	0
175	6.59	20	0	3.0349	86	1		4			6.29		4.95	1	0.786963	60.9929	2	2	0
176	9.27	20	0	2.1575	76	1		4			5.29		5.19	1	0.981096	53.9007	2	4	0
177	5.26	15.26	0	2.90114	82	1		3			4.16		4.99	1	1.19952	58.156	2	1	0
178	5.85	16.22	0	2.77265	81	1		3			3.21		5.26	1	1.63863	57.4468	2	3	0
179	4.29	16.32	0	3.8042	77	1		2			2.29		3.87	1	1.68996	54.6099	2	4	0
180	6.84	19.22	0	2.80994	76	1		1			2.59		2.99	1	1.15444	53.9007	2	2	0
181	4.28	11	0	2.57009	85	1		3			6.24		6.29	1	1.00801	60.2837	2	3	0
182	6.56	16.22	0	2.47256	82	1		4			5.16		6.01	1	1.16473	58.156	2	4	0
183	8.26	9.26	0	1.12107	75	1		3			6.21		9.29	1	1.49597	53.1915	2	3	0
184	5.26	6.29	0	1.19582	71	1		4			6.2		9.29	1	1.49839	50.3546	2	2	0
185	3.01	3.26	0	1.08306	76	1		2			2.29		6.55	1	2.86026	53.9007	2	1	0
186	10.2	16	0	1.56863	72	1		4			6.25		10	1	1.6	51.0638	2	2	0
187	1.26	5.33	0	4.23016	86	1		4			6.32		12	1	1.89873	60.9929	2	3	0
188	2.2	4.29	0	1.95	65	1		3			2.29		6.33	1	2.76419	46.0993	2	1	0
189	1.29	5.29	0	4.10078	71	1		3			6.28		5.94	1	0.94586	50.3546	2	2	0
190	5.21	12	0	2.30326	59	1		2			5.29		5.24	1	0.990548	41.844	2	3	0
191	1.29	7.01	0	5.43411	77	1		1			6.46		6.19	1	0.958204	54.6099	2	2	0
192	2.25	6.26	0	2.78222	76	1		3			5.16		6.19	1	1.19961	53.9007	2	4	0
193	3.21	9.99	0	3.11215	81	1		4			4.29		6.99	1	1.62937	57.4468	2	1	0
194	2.68	10.26	0	3.82836	62	1		3			3.27		9.29	1	2.84098	43.9716	2	3	0
195	2.87	13.22	0	4.60627	68	1		4			3.88		3.26	1	0.840206	48.227	2	4	0
196	1.46	6.26	0	4.28767	75	1		1			1.99		3.48	1	1.74874	53.1915	2	2	0
197	1.43	6.99	0	4.88811	74	1		2			1.56		2.94	1	1.88462	52.4823	2	3	0
198	1.98	3.22	0	1.62626	71	1		1			6.29		9.19	1	1.46105	50.3546	2	4	0
199	6.29	8.78	0	1.39587	52	1		2			7.41		8.11	1	1.09447	36.8794	2	3	0
	3.26	6.32	0	1.93865	62	1		1			3.62		5.26	1	1.45304	43.9716	2	2	0
	3.96	5.29	0	1.33586	58	1		3			3.87		6.82	1	1.76227	41.1348	2	1	0
	3.33	6.98	0	2.0961	55	1		2			3.69		2.99	1	0.810298	39.0071	2	1	0
	3.02	6.29	0	2.08278	61	1		2			4.29		4.98	1	1.16084	43.2624	2	2	0
	4.26	4.95	0	1.16197	50	1		3			6		6.99	1	1.165	35.461	2	3	0
	4.39	3.98	0	0.906606	75	1		3			6.27		6.27	1	1	53.1915	2	2	0
	4.01	2.99	0	0.745636	62	1		3			8.82		8.01	1	0.908163	43.9716	2	4	0
	2.92	6.29	0	2.15411	58	1		2			10.25		13.25	1	1.29268	41.1348	2	1	0
	2.98	5.62	0	1.88591	56	1		4			6.29		9.98	1	1.58665	39.7163	2	3	0
	2.05	9.29	0	4.53171	77	1		4			8.88		12	1	1.35135	54.6099	2	4	0
	2.92	6.29	0	2.15411	60	1		3			8.49		15	1	1.76678	42.5532	2	2	0
	3.96	8.28	0	2.09091	69	1		3			7.01		18	1	2.56776	48.9362	2	3	0
	3.55	7.95	0	2.23944	78	1		2			6.25		12	1	1.92	55.3191	2	4	0
	6.26	10.29	0	1.64377	67	1		1			3.22		5.69	1	1.76708	47.5177	2	3	0
	6.62	16.92	0	2.55589	62	1		3			3.95		6.95	1	1.75949	43.9716	2	2	0
	6.03	20	0	3.31675	69	1		4			3.26		5.55	1	1.70245	48.9362	2	1	0
	4.29	16.29	0	3.7972	78	1		3			3.58		6.98	1	1.94972	55.3191	2	2	0
	4.55	9	0	1.97802	76	1		4			3.94		6.87	1	1.74365	53.9007	2	3	0
	5.01	12	0	2.39521	75	1		1			4.29		5.08	1	1.18415	53.1915	2	1	0
	5.98	16	0	2.67559	73	1		2			4.01		3.55	1	0.885287	51.773	2	2	0
	5.46	15	0	2.74725	79	1		1			3.01		6.95	1	2.30897	56.0284	2	3	0
	1.06	5	0	4.71698	80	1		2			5.26		9.85	1	1.87262	56.7376	2	2	0
	1.52	4.52	0	2.97368	75	1		1			5.21		7.28	1	1.39731	53.1915	2	4	0
	1.87	3.55	0	1.8984	71	1		3			6.85		15.26	1	2.22774	50.3546	2	1	0
	3.26	6.66	0	2.04294	72	1		2			5.24		15	1	2.8626	51.0638	2	3	0
	3.02	9.58	0	3.17219	75	1		2			6.29		16.2	1	2.57552	53.1915	2	4	0
	7.85	15	0	1.91083	76	1		3			8.01		16	1	1.9975	53.9007	2	2	0
	7.29	16	0	2.19479	75	1		3			8.2		15	1	1.82927	53.1915	2	3	0
	7.52	15.2	0	2.02128	79	1		3			8.5		16.2	1	1.90588	56.0284	2	4	0
	7.19	20	0	2.78164	84	1		2			8		18.01	1	2.25125	59.5745	2	3	0
	7.87	16.28	0	2.06861	82	1		4			8.94		20	1	2.23714	58.156	2	2	0
	7.67	9.52	0	1.2412	75	1		4			8.51		20	1	2.35018	53.1915	2	1	0
	7.59	6.85	0	0.902503	42	1		3			8.26		19.2	1	2.32446	29.7872	2	1	0
	7.85	8.29	0	1.05605	76	1		3			8.29		16	1	1.93004	53.9007	2	2	0
	7.29	11.2	0	1.53635	72	1		2			8.51		15.82	1	1.85899	51.0638	2	3	0
	7.28	15.3	0	2.10165	43	1		1			8.14		9.51	1	1.1683	30.4965	2	2	0
	7.87	13.6	0	1.72808	74	1		3			8.01		6.82	1	0.851436	52.4823	2	4	0
	7.48	9.27	0	1.2393	75	1		4			7.51		9.28	1	1.23569	53.1915	2	1	0
	7.46	6.52	0	0.873995	72	1		3			7.29		11.25	1	1.54321	51.0638	2	3	0
	7.41	9.82	0	1.32524	71	1		4			9.52		19	1	1.9958	50.3546	2	4	0
	7.027	16.28	0	2.31678	66	1		1			9.04		8.99	1	0.994469	46.8085	2	2	0
	7.21	19.52	0	2.70735	75	1		2			9.75		18	1	1.84615	53.1915	2	3	0
	7.88	19.7	0	2.5	62	1		1			7.85		20	1	2.54777	43.9716	2	4	0
	7.5	20	0	2.66667	68	1		2			8.5		19.6	1	2.30588	48.227	2	3	0
	6	16.38	0	2.73	59	1		1			8.62		19.5	1	2.26218	41.844	2	2	0
	7.99	16.01	0	2.00375	65	1		3			7.01		20	1	2.85307	46.0993	2	1	0
	8.01	18.62	0	2.32459	69	1		2			6.29		19	1	3.02067	48.9362	2	2	0
	8.21	17.62	0	2.14616	88	1		2			10.85		20	1	1.84332	62.4113	2	3	0
	8.26	13	0	1.57385	85	1		3			11.01		25.24	1	2.29246	60.2837	2	4	0
	8.29	15	0	1.80941	72	1		3			9.85		30	1	3.04569	51.0638	2	1	0
	8.51	14.56	0	1.71093	76	1		3			8.41		30	1	3.56718	53.9007	2	3	0
	5.62	12	0	2.13523	72	1		2			8.49		29	1	3.41578	51.0638	2	4	0
	5.01	15	0	2.99401	75	1		4			8.59		28	1	3.2596	53.1915	2	2	0
	4.52	12	0	2.65487	71	1		4			7.14		15	1	2.10084	50.3546	2	3	0
	4.2	16	0	3.80952	76	1		3			5.85		21	1	3.58974	53.9007	2	4	0
	6.2	20	0	3.22581	62	1		3			6.28		20	1	3.18471	43.9716	2	3	0
	2.6	9	0	3.46154	64	1		2			9.85		26	1	2.63959	45.3901	2	2	0
	3.8	15	0	3.94737	75	1		1			8.18		26	1	3.17848	53.1915	2	1	0
	4.11	16	0	3.89294	78	1		3			11		12	1	1.09091	55.3191	2	2	0
	4.5	18	0	4	70	1		4			12.2		9	1	0.737705	49.6454	2	3	0
	3.38	11	0	3.25444	80	1		3			13.6		10	1	0.735294	56.7376	2	1	0
	6.1	9	0	1.47541	58	1		4			15.27		9	1	0.589391	41.1348	2	2	0
	4.55	5.1	0	1.12088	46	1		1			10.5		8	1	0.761905	32.6241	2	3	0
	4.87	5	0	1.02669	48	1		2			12.2		9.8	1	0.803279	34.0426	2	2	0
	4.99	5.6	0	1.12224	56	1		1			13.3		16	1	1.20301	39.7163	2	4	0
	5.41	4.8	0	0.887246	66	1		2			12.5		10	1	0.8	46.8085	2	1	0
	5.26	8	0	1.52091	65	1		1			15.1		7	1	0.463576	46.0993	2	3	0
	3.85	9.1	0	2.36364	68	1		3			14.5		8	1	0.551724	48.227	2	4	0
	2.94	5.25	0	1.78571	69	1		2			10.5		18	1	1.71429	48.9362	2	2	0
	3.21	6.36	0	1.98131	62	1		2			9.8		16	1	1.63265	43.9716	2	3	0
	4.58	8.28	0	1.80786	61	1		3			9.4		12	1	1.2766	43.2624	2	4	0
	6.52	9.28	0	1.42331	69	1		3			9.5		9.9	1	1.04211	48.9362	2	3	0
	5.58	10	0	1.79211	65	1		3			11.8		10	1	0.847458	46.0993	2	2	0
	6.01	13	0	2.16306	68	1		2			12		16	1	1.33333	48.227	2	1	0
	2.14	10.2	0	4.76636	78	1		4			13		9	1	0.692308	55.3191	2	1	0
	4.3	12	0	2.7907	65	1		4			8.7		9	1	1.03448	46.0993	2	2	0
	3.48	9	0	2.58621	61	1		3			11.2		8.9	1	0.794643	43.2624	2	3	0
	6.25	16	0	2.56	62	1		3			12.5		10	1	0.8	43.9716	2	2	0
	5.1	18	0	3.52941	73	1		2			6.5		9.5	1	1.46154	51.773	2	4	0
	5.63	16	0	2.84192	80	1		1			8.5		11	1	1.29412	56.7376	2	1	0
	5.62	15	0	2.66904	69	1		3			9.7		12	1	1.23711	48.9362	2	3	0
	8.25	11	0	1.33333	66	1		4			8.9		15.2	1	1.70787	46.8085	2	4	0
	7.41	9	0	1.21457	55	1		3			9.4		10.1	1	1.07447	39.0071	2	2	0
	7.14	8	0	1.12045	58	1		4			9.5		8.2	1	0.863158	41.1348	2	3	0
	5.26	15	0	2.85171	67	1		1			8.7		8.7	1	1	47.5177	2	4	0
	5.01	8	0	1.59681	69	1		2			7.6		8.2	1	1.07895	48.9362	2	3	0
	3.67	4.01	0	1.09264	71	1		1			9.8		8.9	1	0.908163	50.3546	2	2	0
	3.55	4.8	0	1.35211	72	1		2			10.5		9.8	1	0.933333	51.0638	2	1	0
	5.62	5.9	0	1.04982	75	1		1			14		11	1	0.785714	53.1915	2	2	0
	5.82	4.7	0	0.80756	46	1		3			14.8		12	1	0.810811	32.6241	2	3	0
	5.5	8	0	1.45455	75	1		2			8		9	1	1.125	53.1915	2	4	0
	9.5	8	0	0.842105	44	1		2			6.4		9	1	1.40625	31.2057	2	1	0
	8.24	7	0	0.849515	39	1		3			5.4		8.7	1	1.61111	27.6596	2	3	0
	8.02	9.8	0	1.22195	73	1		3			6.5		9.5	1	1.46154	51.773	2	4	0
	7.16	16	0	2.23464	75	1		3			5.5		8.4	1	1.52727	53.1915	2	2	0
	7.22	20	0	2.77008	76	1		2			5.1		4.9	1	0.960784	53.9007	2	3	0
	4.66	18	0	3.86266	71	1		4			5.7		7.6	1	1.33333	50.3546	2	4	0
	5.88	20	0	3.40136	72	1		4			6.4		9.8	1	1.53125	51.0638	2	3	0
	3.17	3.8	0	1.19874	75	1		3			4.2		8.5	1	2.02381	53.1915	2	2	0
	3.5	6.5	0	1.85714	76	1		3			4.1		4.9	1	1.19512	53.9007	2	1	0
	3.99	18	0	4.51128	72	1		2			4.8		4.7	1	0.979167	51.0638	2	2	0
	7.8	19	0	2.4359	75	1		1			5.62		8.2	1	1.45907	53.1915	2	3	0
	7.6	20	0	2.63158	71	1		3			5.94		6.25	1	1.05219	50.3546	2	1	0
	7.95	19.6	0	2.46541	75	1		4			5.01		6.92	1	1.38124	53.1915	2	2	0
	7.05	15	0	2.12766	76	1		3			4.8		2.6	1	0.541667	53.9007	2	3	0
	7.19	20	0	2.78164	75	1		4			5.68		3.9	1	0.68662	53.1915	2	2	0
	7	12	0	1.71429	72	1		1			5.55		4.5	1	0.810811	51.0638	2	4	0
	6.5	11.9	0	1.83077	66	1		2			5.95		9.2	1	1.54622	46.8085	2	1	0
	8.25	9.8	0	1.18788	62	1		1			4.98		8.2	1	1.64659	43.9716	2	3	0
	8.91	16	0	1.79574	67	1		2			9.52		5.6	1	0.588235	47.5177	2	4	0
	8.05	18.9	0	2.34783	67	1		1			9.16		8.7	1	0.949782	47.5177	2	2	0
	8.11	19.2	0	2.36745	61	1		3			9.08		4.8	1	0.528634	43.2624	2	3	0
	8.67	20	0	2.30681	73	1		2			9.87		2.6	1	0.263425	51.773	2	4	0
	8.79	13	0	1.47895	62	1		2			7.28		3.2	1	0.43956	43.9716	2	3	0
	8.1	15.2	0	1.87654	65	1		3			7.92		3.5	1	0.441919	46.0993	2	2	0
	9.2	18.8	0	2.04348	68	1		3			5.15		2.9	1	0.563107	48.227	2	1	0
	9.15	20	0	2.18579	69	1		3			6.42		8.8	1	1.37072	48.9362	2	1	0
	8.01	11	0	1.37328	65	1		2			6.38		6.9	1	1.0815	46.0993	2	2	0
	7.88	8.1	0	1.02792	64	1		4			6.94		9.2	1	1.32565	45.3901	2	3	0
	7.62	9.8	0	1.28609	62	1		4			9.58		2.3	1	0.240084	43.9716	2	2	0
	7.28	8.7	0	1.19505	63	1		3			5.24		9.8	1	1.87023	44.6809	2	4	0
	7.98	6.2	0	0.776942	65	1		3			6.28		8.9	1	1.4172	46.0993	2	1	0
	7.91	7	0	0.884956	66	1		2			5.99		9.6	1	1.60267	46.8085	2	3	0
	7.24	6.9	0	0.953039	68	1		1			8.75		5	1	0.571429	48.227	2	4	0
	7.46	10.6	0	1.42091	62	1		3			9.65		9.86	1	1.02176	43.9716	2	2	0
	8.45	13.2	0	1.56213	65	1		4			8.16		13.2	1	1.61765	46.0993	2	3	0
	8.49	15.5	0	1.82568	68	1		3			5.89		2.6	1	0.441426	48.227	2	4	0
	7.65	15	0	1.96078	55	1		4			5.66		3.5	1	0.618375	39.0071	2	3	0
	7.59	13.2	0	1.73913	51	1		1			5.92		1.6	1	0.27027	36.1702	2	2	0
	9.5	16.2	0	1.70526	58	1		2			3.2		3.6	1	1.125	41.1348	2	1	0
	2.6	6	0	2.30769	59	2		1			2.6		2.6	1	1	41.844	2	2	0
	3.5	12.3	0	3.51429	80	2		2			3.8		2.1	1	0.552632	56.7376	2	3	0
	4.6	15.5	0	3.36957	74	2		1			2.6		1.8	1	0.692308	52.4823	2	4	0
	5.8	20	0	3.44828	72	2		3			1.8		1.8	1	1	51.0638	2	1	0
	6.44	6.9	0	1.07143	55	2		2			1.65		3.2	1	1.93939	39.0071	2	3	0
	5.2	18	0	3.46154	69	2		2			1.23		1.6	1	1.30081	48.9362	2	4	0
	6.8	15	0	2.20588	68	2		3			1.87		1.8	1	0.962567	48.227	2	2	0
	1.9	10.2	0	5.36842	62	2		3			1.6		3.5	1	2.1875	43.9716	2	3	0
	2.8	9.2	0	3.28571	63	2		3			1.9		1.2	1	0.631579	44.6809	2	4	0
	2.6	11	0	4.23077	66	2		2			2.5		1.6	1	0.64	46.8085	2	3	0
	5.4	9.8	0	1.81481	75	2		4			4.3		1.9	1	0.44186	53.1915	2	2	0
	6.8	20	0	2.94118	78	2		4			4.6		2.8	1	0.608696	55.3191	2	1	0
	4.5	9.8	0	2.17778	79	2		3			4.2		3.8	1	0.904762	56.0284	2	2	0
	4.1	11.6	0	2.82927	71	2		3			5.1		7	1	1.37255	50.3546	2	3	0
	1.6	6.5	0	4.0625	75	2		2			5.6		8.2	1	1.46429	53.1915	2	1	0
	1.9	5.4	0	2.84211	70	2		1			6.2		8.4	1	1.35484	49.6454	2	2	0
	1.5	6.3	0	4.2	76	2		3			3.5		4.6	1	1.31429	53.9007	2	3	0
	3.6	10.5	0	2.91667	65	2		4			3.8		1.8	1	0.473684	46.0993	2	2	0
	3.1	9.8	0	3.16129	74	2		3			4.6		2.2	1	0.478261	52.4823	2	4	0
	1.9	4.8	0	2.52632	72	2		4			6.5		3.8	1	0.584615	51.0638	2	1	0
	4.6	4.2	0	0.913043	61	2		3			6.5		5	1	0.769231	43.2624	2	3	0
	4.8	6.5	0	1.35417	64	2		2			5.9		5.2	1	0.881356	45.3901	2	4	0
	4.6	3.6	0	0.782609	62	2		2			1.8		3.5	1	1.94444	43.9716	2	2	0
	4.8	2.6	0	0.541667	65	2		3			1.63		2.9	1	1.77914	46.0993	2	3	0
	4.5	4.5	0	1	63	2		3			1.54		0.8	1	0.519481	44.6809	2	4	0
	4.6	6.5	0	1.41304	65	2		3			1.5		0.8	1	0.533333	46.0993	2	3	0
	4.5	6.8	0	1.51111	61	2		2			1.01		0.9	1	0.891089	43.2624	2	2	0
	3.6	8.6	0	2.38889	68	2		4			1.9		8	1	4.21053	48.227	2	1	0
	3.7	9	0	2.43243	62	2		4			1.4		2.8	1	2	43.9716	2	1	0
	5.6	12.2	0	2.17857	65	2		3			2.6		2.4	1	0.923077	46.0993	2	2	0
	2.8	16.5	0	5.89286	83	2		3			2.8		5.5	1	1.96429	58.8652	2	3	0
	2.9	15.2	0	5.24138	74	2		2			2.4		7.8	1	3.25	52.4823	2	2	0
	3.7	12.6	0	3.40541	66	2		1			2.9		7.4	1	2.55172	46.8085	2	4	0
	3.5	6.4	0	1.82857	55	2		3			3.5		6.5	1	1.85714	39.0071	2	1	0
	3.6	2.9	0	0.805556	66	2		4			1.8		2.8	1	1.55556	46.8085	2	3	0
	3.2	4.68	0	1.4625	62	2		3			1.05		0.8	1	0.761905	43.9716	2	4	0
	2.6	2.87	0	1.10385	68	2		4			0.98		2.1	1	2.14286	48.227	2	2	0
	2.9	5	0	1.72414	61	2		1			0.54		1.2	1	2.22222	43.2624	2	3	0
	2.7	3.8	0	1.40741	62	2		2			0.88		0.8	1	0.909091	43.9716	2	4	0
	2.7	2.9	0	1.07407	65	2		1			2.3		1.2	1	0.521739	46.0993	2	3	0
	3.7	6.5	0	1.75676	63	2		2			1.7		0.5	1	0.294118	44.6809	2	2	0
	6.5	6.8	0	1.04615	65	2		1			1.9		0.7	1	0.368421	46.0993	2	1	0
	3.5	7.5	0	2.14286	66	2		3			2.8		2.1	1	0.75	46.8085	2	2	0
	3.8	6.4	0	1.68421	65	2		2			2.6		1.8	1	0.692308	46.0993	2	3	0
	4.6	5.9	0	1.28261	62	2		2			3.5		2.1	1	0.6	43.9716	2	4	0
	4.1	6.5	0	1.58537	75	2		3			2.9		2	1	0.689655	53.1915	2	1	0
	4.6	4.8	0	1.04348	78	2		3			3.3		2.6	1	0.787879	55.3191	2	3	0
	4.8	8.9	0	1.85417	79	2		3			3.8		2.7	1	0.710526	56.0284	2	4	0
	3.8	12.3	0	3.23684	72	2		2			3.4		2.1	1	0.617647	51.0638	2	2	0
	5	6.24	0	1.248	75	2		4			2.9		2.5	1	0.862069	53.1915	2	3	0
	3.6	6.8	0	1.88889	76	2		4			7.2		12.2	1	1.69444	53.9007	2	4	0
	3.5	6	0	1.71429	71	2		3			7.8		16.5	1	2.11538	50.3546	2	3	0
	8.6	19	0	2.2093	75	2		3			5.6		6.5	1	1.16071	53.1915	2	2	0
	8.9	12.2	0	1.37079	75	2		2			6.8		5.4	1	0.794118	53.1915	2	1	0
	11.5	16.5	0	1.43478	79	2		1			6.1		4.6	1	0.754098	56.0284	2	2	0
	10.4	16.8	0	1.61538	70	2		3			2.8		3.2	1	1.14286	49.6454	2	3	0
	8.8	17.5	0	1.98864	78	2		4			3.9		3.7	1	0.948718	55.3191	2	1	0
	8.4	17.1	0	2.03571	79	2		3			4.6		3.6	1	0.782609	56.0284	2	2	0
	5.9	16.5	0	2.79661	72	2		4			6.8		4.8	1	0.705882	51.0638	2	3	0
	9.4	20	0	2.12766	81	2		1			7.1		8.9	1	1.25352	57.4468	2	2	0
	12.3	16.5	0	1.34146	86	2		2			8.8		9.8	1	1.11364	60.9929	2	4	0
	12.5	19.8	0	1.584	81	2		1			9.4		12.5	1	1.32979	57.4468	2	1	0
	11.4	11.2	0	0.982456	82	2		2			6.5		12.2	1	1.87692	58.156	2	3	0
	12.6	13.5	0	1.07143	75	2		1			7.2		10.1	1	1.40278	53.1915	2	4	0
	12.1	9.8	0	0.809917	74	2		3			7.5		9.7	1	1.29333	52.4823	2	2	0
	9.5	20	0	2.10526	76	2		2			7.4		6.7	1	0.905405	53.9007	2	3	0
	6.4	20	0	3.125	72	2		2			7.6		1.6	1	0.210526	51.0638	2	4	0
	6.2	19.8	0	3.19355	71	2		3			7.1		3.5	1	0.492958	50.3546	2	3	0
	8.7	20	0	2.29885	75	2		3			8.5		5.8	1	0.682353	53.1915	2	2	0
	7.8	13	0	1.66667	74	2		3			10.6		6.4	1	0.603774	52.4823	2	1	0
	7.2	12.9	0	1.79167	72	2		2			5.2		8.2	1	1.57692	51.0638	2	1	0
	6.5	8.3	0	1.27692	62	2		4			4.6		3.5	1	0.76087	43.9716	2	2	0
	5.6	9.5	0	1.69643	66	2		4			5.8		4.6	1	0.793103	46.8085	2	3	0
	4.8	12	0	2.5	53	2		3			6.5		3.9	1	0.6	37.5887	2	2	0
	6.21	16.5	0	2.657	58	2		3			4.9		3.5	1	0.714286	41.1348	2	4	0
	4.26	18.9	0	4.43662	68	2		2			5.6		6.5	1	1.16071	48.227	2	1	0
	7.25	20	0	2.75862	62	2		1			4.6		3.9	1	0.847826	43.9716	2	3	0
	5.3	20	0	3.77358	64	2		3			2.9		3.8	1	1.31034	45.3901	2	4	0
	6.28	16.5	0	2.62739	52	2		4			8.5		6.9	1	0.811765	36.8794	2	2	0
	6.28	11.2	0	1.78344	58	2		3			11.5		8.5	1	0.73913	41.1348	2	3	0
	6.81	9.8	0	1.43906	62	2		4			16.2		8	1	0.493827	43.9716	2	4	0
	7.29	11.8	0	1.61866	68	2		1			12.2		16.5	1	1.35246	48.227	2	3	0
	8.61	19.2	0	2.22997	73	2		2			13.2		13.5	1	1.02273	51.773	2	2	0
	8.1	20	0	2.46914	71	2		1			8.5		9.8	1	1.15294	50.3546	2	1	0
	6.5	7.8	0	1.2	55	2		2			7.9		7.9	1	1	39.0071	2	2	0
	5.47	9.8	0	1.79159	59	2		1			4.9		6.5	1	1.32653	41.844	2	3	0
	3.86	9.8	0	2.53886	57	2		3			8.7		16	1	1.83908	40.4255	2	4	0
	4.65	16	0	3.44086	66	2		2			6.1		9.8	1	1.60656	46.8085	2	1	0
	5.92	18	0	3.04054	72	2		2			1.9		3	1	1.57895	51.0638	2	3	0
	6.2	12.6	0	2.03226	62	2		3			8.9		7.8	1	0.876404	43.9716	2	4	0
	6.51	14.5	0	2.22734	68	2		3			9.5		8.4	1	0.884211	48.227	2	2	0
	5.49	16.5	0	3.00546	73	2		3			9.1		6	1	0.659341	51.773	2	3	0
	4.62	8.1	0	1.75325	64	2		2			7.8		11.2	1	1.4359	45.3901	2	4	0
	4.87	9	0	1.84805	66	2		4			6.1		12.2	1	2	46.8085	2	3	0
	4.96	5.8	0	1.16935	55	2		4			5.8		9.2	1	1.58621	39.0071	2	2	0
	5.87	6.2	0	1.05622	33	2		3			4.7		8.1	1	1.7234	23.4043	2	1	0
	6.29	8.5	0	1.35135	39	2		3			4.9		6.5	1	1.32653	27.6596	2	2	0
	4.61	11.6	0	2.51627	34	2		2			5.6		4.9	1	0.875	24.1135	2	3	0
	5.8	16	0	2.75862	38	2		1			6.8		6	1	0.882353	26.9504	2	1	0
	9.5	14.5	0	1.52632	46	2		3			8.7		9.9	1	1.13793	32.6241	2	2	0
	2.9	18.4	0	6.34483	78	2		4			4.9		6.8	1	1.38776	55.3191	2	3	0
	3.1	11.5	0	3.70968	55	2		3			11.6		9.8	1	0.844828	39.0071	2	2	0
	6.2	19	0	3.06452	51	2		4			12		10.2	1	0.85	36.1702	2	4	0
	10.6	20	0	1.88679	56	2		1			6.5		9.8	1	1.50769	39.7163	2	1	0
	11.8	15.5	0	1.31356	59	2		2			4.8		7.7	1	1.60417	41.844	2	3	0
	12.6	16.8	0	1.33333	57	2		1			1.6		2.6	1	1.625	40.4255	2	4	0
	3.5	12	0	3.42857	66	2		2			2.8		2	1	0.714286	46.8085	2	2	0
	9.2	16.7	0	1.81522	56	2		1			10.5		6.7	1	0.638095	39.7163	2	3	0
	5.8	18	0	3.10345	69	2		3			1.9		3.5	1	1.84211	48.9362	2	4	0
	8.9	16	0	1.79775	58	2		2			2.8		5.1	1	1.82143	41.1348	2	3	0
	7.9	14.8	0	1.87342	56	2		2			3.51		4.3	1	1.22507	39.7163	2	2	0
	8.1	13.5	0	1.66667	54	2		3			1.68		2.8	1	1.66667	38.2979	2	1	0
	4.6	18	0	3.91304	65	2		3			6.4		5.6	1	0.875	46.0993	2	1	0
	1.6	5	0	3.125	52	2		3			3.8		3.9	1	1.02632	36.8794	2	2	0
	2.8	10.6	0	3.78571	75	2		2			7.9		11.2	1	1.41772	53.1915	2	3	0
	6.5	19	0	2.92308	58	2		4			3.4		6.5	1	1.91176	41.1348	2	2	0
	4.6	18	0	3.91304	76	2		4			4.9		5.5	1	1.12245	53.9007	2	4	0
	8.2	16.5	0	2.0122	54	2		3			6.8		6.9	1	1.01471	38.2979	2	1	0
	8.7	20	0	2.29885	58	2		3			5.8		5.6	1	0.965517	41.1348	2	3	0
	8.9	16.7	0	1.8764	65	2		2			2.2		4.2	1	1.90909	46.0993	2	4	0
	9.5	13.5	0	1.42105	66	2		1			6.3		3.2	1	0.507937	46.8085	2	2	0
	0.9	8	0	8.88889	68	2		3			1.6		5	1	3.125	48.227	2	3	0
	1.5	7.2	0	4.8	62	2		4			1.8		4.6	1	2.55556	43.9716	2	4	0
	1.1	6.5	0	5.90909	65	2		3			7.2		16	1	2.22222	46.0993	2	3	0
	0.6	5.6	0	9.33333	79	2		4			5.8		15	1	2.58621	56.0284	2	2	0
	2.8	11.5	0	4.10714	77	2		1			5.9		13.2	1	2.23729	54.6099	2	1	0
	3.2	13	0	4.0625	62	2		2			3.4		11.1	1	3.26471	43.9716	2	2	0
	2.8	16	0	5.71429	53	2		1			0.8		2.9	1	3.625	37.5887	2	4	0
	2.1	11.8	0	5.61905	58	2		2			7.2		11.8	1	1.63889	41.1348	2	1	0
	1.8	11	0	6.11111	66	2		1			2.6		11.6	1	4.46154	46.8085	2	3	0
	2.8	16	0	5.71429	76	2		3			3.5		11.5	1	3.28571	53.9007	2	4	0
	3.5	20	0	5.71429	82	2		2			3.9		8.1	1	2.07692	58.156	2	2	0
	3.3	19	0	5.75758	78	2		2			4.1		7.1	1	1.73171	55.3191	2	3	0
	2.1	13	0	6.19048	79	2		3			2.8		1.9	1	0.678571	56.0284	2	4	0
	1.5	12.3	0	8.2	75	2		3			2		5.6	1	2.8	53.1915	2	3	0
	1.6	10.2	0	6.375	71	2		3			1.6		5.1	1	3.1875	50.3546	2	2	0
	1.1	9	0	8.18182	77	2		2			0.8		2.1	1	2.625	54.6099	2	1	0
	2.5	8.1	0	3.24	68	2		4			7.8		8.7	1	1.11538	48.227	2	2	0
	3.8	9.7	0	2.55263	46	2		4			9.7		8.9	1	0.917526	32.6241	2	3	0
	4.9	16	0	3.26531	65	2		3			4.8		3.8	1	0.791667	46.0993	2	1	0
	6.2	20	0	3.22581	57	2		3			6.5		5.9	1	0.907692	40.4255	2	2	0
	4.8	19	0	3.95833	72	2		2			4.8		5.8	1	1.20833	51.0638	2	3	0
	4.6	20	0	4.34783	59	2		1			6.6		5.9	1	0.893939	41.844	2	2	0
	3.1	20	0	6.45161	59	2		3			7.1		6.7	1	0.943662	41.844	2	4	0
	2.8	17	0	6.07143	74	2		4			2.6		6.3	1	2.42308	52.4823	2	1	0
	4.6	20	0	4.34783	56	2		3			3.8		5.4	1	1.42105	39.7163	2	3	0
	4.1	15.2	0	3.70732	78	2		4			4.8		7.8	1	1.625	55.3191	2	4	0
	3.7	17.6	0	4.75676	90	2		1			5.8		9.5	1	1.63793	63.8298	2	2	0
	2.7	19	0	7.03704	51	2		2			8.8		20	1	2.27273	36.1702	2	3	0
	1.6	13.6	0	8.5	58	2		1			4.6		11.2	1	2.43478	41.1348	2	4	0
	1.4	12	0	8.57143	77	2		2			7.8		13.6	1	1.74359	54.6099	2	3	0
	0.6	7	0	11.6667	79	2		1			6.5		16.5	1	2.53846	56.0284	2	2	0
	5.2	20	0	3.84615	85	2		3			5.8		11.5	1	1.98276	60.2837	2	1	0
	1.6	12.3	0	7.6875	68	2		2			2.1		2.8	1	1.33333	48.227	2	1	0
	2.2	16.5	0	7.5	72	2		2			1.7		3.8	1	2.23529	51.0638	2	2	0
	2.8	15.5	0	5.53571	53	2		3			2.6		3.5	1	1.34615	37.5887	2	3	0
	0.98	10.2	0	10.4082	78	2		3			3.8		6.4	1	1.68421	55.3191	2	2	0
	2.6	16.6	0	6.38462	59	2		3			7.8		11.7	1	1.5	41.844	2	4	0
	2.4	18.8	0	7.83333	68	2		2			6.1		8.7	1	1.42623	48.227	2	1	0
	1.6	17.9	0	11.1875	60	2		4			2.9		8.8	1	3.03448	42.5532	2	3	0
	1.3	11	0	8.46154	71	2		4			6.5		9.5	1	1.46154	50.3546	2	4	0
	0.7	6.5	0	9.28571	63	2		3			5.1		11	1	2.15686	44.6809	2	2	0
	6.5	15.9	0	2.44615	58	2		3			4.8		8.7	1	1.8125	41.1348	2	3	0
	5.2	20	0	3.84615	54	2		2			5.2		6.8	1	1.30769	38.2979	2	4	0
	3.3	18.7	0	5.66667	66	2		1			6.8		12.3	1	1.80882	46.8085	2	3	0
	4.5	20	0	4.44444	83	2		3			2.6		6.9	1	2.65385	58.8652	2	2	0
	4.1	18.9	0	4.60976	75	2		4			2.7		3.8	1	1.40741	53.1915	2	1	0
	3	19	0	6.33333	76	2		3			4.5		2.6	1	0.577778	53.9007	2	2	0
	1.8	17.6	0	9.77778	71	2		4			4.9		4.1	1	0.836735	50.3546	2	3	0
	1.9	18	0	9.47368	81	2		1			3.1		3.9	1	1.25806	57.4468	2	3	0
	3.9	19	0	4.87179	62	2		2			6.7		5.2	1	0.776119	43.9716	2	2	0
	2.9	20	0	6.89655	58	2		1			8.1		6.7	1	0.82716	41.1348	2	1	0
	4.6	17	0	3.69565	75	2		2
	3.5	15.2	0	4.34286	59	2		1
	3.8	13.6	0	3.57895	72	2		3
	3.2	13.3	0	4.15625	57	2		2
	2.7	15.2	0	5.62963	66	2		2
	2.2	13.2	0	6	58	2		3
	1.8	8.7	0	4.83333	77	2		3
	3.6	11.8	0	3.27778	75	2		3
	2.7	13.6	0	5.03704	71	2		2
	2.6	14.7	0	5.65385	66	2		4
	3.8	15.2	0	4	58	2		4
	2.9	16.2	0	5.58621	59	2		3
	1.8	11	0	6.11111	72	2		3
	1.5	6.7	0	4.46667	52	2		2
	3.2	8.9	0	2.78125	58	2		1
	3.6	10.5	0	2.91667	56	2		3
	3.1	13.4	0	4.32258	77	2		4
	2.5	13.6	0	5.44	68	2		3
	2.6	10.3	0	3.96154	78	2		4
	3.1	9.8	0	3.16129	69	2		1
	3.5	13.4	0	3.82857	67	2		2
	2.4	15.6	0	6.5	62	2		1
	2.1	12.1	0	5.7619	65	2		2
	1.6	9.7	0	6.0625	68	2		1
	6.3	11.2	0	1.77778	64	2		3
	4.7	13.2	0	2.80851	71	2		3
	3.9	10.5	0	2.69231	69	2		3
	4.7	9	0	1.91489	65	2		2
	5.6	10.5	0	1.875	38	2		4
	5.1	16	0	3.13725	44	2		4
	2.8	9.1	0	3.25	46	2		3
	2.6	10.7	0	4.11538	66	2		3
	3.7	13.2	0	3.56757	55	2		2
	3	8.9	0	2.96667	68	2		1

## Sheet: variable-D
				1-特异性	敏感性							Test vte
				1	1	0						Cutoff >	Sensitivity	95% CI	Specificity
			0.2253	0.998	1	0.002						0.2253	1	0.9931 to 1.000	0.001996
			0.2518	0.996	1	0.004						0.2518	1	0.9931 to 1.000	0.003992
			0.2668	0.994	1	0.006						0.2668	1	0.9931 to 1.000	0.005988
			0.2822	0.992	1	0.008						0.2822	1	0.9931 to 1.000	0.007984
			0.3193	0.99	1	0.01						0.3193	1	0.9931 to 1.000	0.01
			0.3565	0.988	1	0.012						0.3565	1	0.9931 to 1.000	0.012
			0.378	0.986	1	0.014						0.378	1	0.9931 to 1.000	0.014
			0.3957	0.984	1	0.016						0.3957	1	0.9931 to 1.000	0.016
			0.4144	0.982	1	0.018						0.4144	1	0.9931 to 1.000	0.018
			0.429	0.98	1	0.02						0.429	1	0.9931 to 1.000	0.02
			0.4363	0.978	1	0.022						0.4363	1	0.9931 to 1.000	0.022
			0.4405	0.976	1	0.024						0.4405	1	0.9931 to 1.000	0.024
			0.4416	0.9741	1	0.0259						0.4416	1	0.9931 to 1.000	0.026
			0.4418	0.9721	1	0.0279						0.4418	1	0.9931 to 1.000	0.0279
			0.4419	0.9701	1	0.0299						0.4419	1	0.9931 to 1.000	0.0299
			0.4458	0.9681	1	0.0319						0.4458	1	0.9931 to 1.000	0.0319
			0.4566	0.9661	1	0.0339						0.4566	1	0.9931 to 1.000	0.0339
			0.4686	0.9641	1	0.0359						0.4686	1	0.9931 to 1.000	0.0359
			0.476	0.9621	1	0.0379						0.476	1	0.9931 to 1.000	0.0379
			0.4856	0.9601	1	0.0399						0.4856	1	0.9931 to 1.000	0.0399
			0.4934	0.9581	1	0.0419						0.4934	1	0.9931 to 1.000	0.0419
			0.5009	0.9561	1	0.0439						0.5009	1	0.9931 to 1.000	0.0439
			0.5137	0.9541	1	0.0459						0.5137	1	0.9931 to 1.000	0.0459
			0.5206	0.9521	1	0.0479						0.5206	1	0.9931 to 1.000	0.0479
			0.5221	0.9501	1	0.0499						0.5221	1	0.9931 to 1.000	0.0499
			0.5255	0.9481	1	0.0519						0.5255	1	0.9931 to 1.000	0.0519
			0.5292	0.9461	1	0.0539						0.5292	1	0.9931 to 1.000	0.0539
			0.5316	0.9441	1	0.0559						0.5316	1	0.9931 to 1.000	0.0559
			0.5375	0.9421	1	0.0579						0.5375	1	0.9931 to 1.000	0.0579
			0.5467	0.9401	0.9981	0.058						0.5467	0.9981	0.9896 to 1.0000	0.0599		0.058
			0.5517	0.9381	0.9981	0.06						0.5517	0.9981	0.9896 to 1.0000	0.0619		0.06
			0.5522	0.9361	0.9981	0.062						0.5522	0.9981	0.9896 to 1.0000	0.0639		0.062
			0.5532	0.9341	0.9981	0.064						0.5532	0.9981	0.9896 to 1.0000	0.0659		0.064
			0.5581	0.9321	0.9981	0.066						0.5581	0.9981	0.9896 to 1.0000	0.0679		0.066
			0.5627	0.9301	0.9981	0.068						0.5627	0.9981	0.9896 to 1.0000	0.0699		0.068
			0.5666	0.9281	0.9981	0.07						0.5666	0.9981	0.9896 to 1.0000	0.0719		0.07
			0.5708	0.9261	0.9981	0.072						0.5708	0.9981	0.9896 to 1.0000	0.0739		0.072
			0.5746	0.9242	0.9981	0.0739						0.5746	0.9981	0.9896 to 1.0000	0.0759		0.074
			0.578	0.9222	0.9981	0.0759						0.578	0.9981	0.9896 to 1.0000	0.0778		0.0759
			0.5814	0.9202	0.9981	0.0779						0.5814	0.9981	0.9896 to 1.0000	0.0798		0.0779
			0.5864	0.9182	0.9981	0.0799						0.5864	0.9981	0.9896 to 1.0000	0.0818		0.0799
			0.5886	0.9162	0.9981	0.0819						0.5886	0.9981	0.9896 to 1.0000	0.0838		0.0819
			0.5892	0.9142	0.9981	0.0839						0.5892	0.9981	0.9896 to 1.0000	0.0858		0.0839
			0.5947	0.9122	0.9981	0.0859						0.5947	0.9981	0.9896 to 1.0000	0.0878		0.0859
			0.6012	0.9082	0.9981	0.0899						0.6012	0.9981	0.9896 to 1.0000	0.0918		0.0899
			0.6031	0.9062	0.9981	0.0919						0.6031	0.9981	0.9896 to 1.0000	0.0938		0.0919
			0.6039	0.9042	0.9981	0.0939						0.6039	0.9981	0.9896 to 1.0000	0.0958		0.0939
			0.6063	0.9022	0.9981	0.0959						0.6063	0.9981	0.9896 to 1.0000	0.0978		0.0959
			0.6086	0.9002	0.9981	0.0979						0.6086	0.9981	0.9896 to 1.0000	0.0998		0.0979
			0.6132	0.8982	0.9981	0.0999						0.6132	0.9981	0.9896 to 1.0000	0.1018		0.0999
			0.618	0.8962	0.9981	0.1019						0.618	0.9981	0.9896 to 1.0000	0.1038		0.1019
			0.625	0.8942	0.9981	0.1039						0.625	0.9981	0.9896 to 1.0000	0.1058		0.1039
			0.634	0.8922	0.9981	0.1059						0.634	0.9981	0.9896 to 1.0000	0.1078		0.1059
			0.6369	0.8902	0.9981	0.1079						0.6369	0.9981	0.9896 to 1.0000	0.1098		0.1079
			0.6374	0.8882	0.9981	0.1099						0.6374	0.9981	0.9896 to 1.0000	0.1118		0.1099
			0.6377	0.8862	0.9981	0.1119						0.6377	0.9981	0.9896 to 1.0000	0.1138		0.1119
			0.639	0.8842	0.9981	0.1139						0.639	0.9981	0.9896 to 1.0000	0.1158		0.1139
			0.6447	0.8802	0.9981	0.1179						0.6447	0.9981	0.9896 to 1.0000	0.1198		0.1179
			0.6512	0.8782	0.9981	0.1199						0.6512	0.9981	0.9896 to 1.0000	0.1218		0.1199
			0.6561	0.8762	0.9981	0.1219						0.6561	0.9981	0.9896 to 1.0000	0.1238		0.1219
			0.6599	0.8743	0.9981	0.1238						0.6599	0.9981	0.9896 to 1.0000	0.1257		0.1238
			0.6695	0.8723	0.9981	0.1258						0.6695	0.9981	0.9896 to 1.0000	0.1277		0.1258
			0.6795	0.8703	0.9981	0.1278						0.6795	0.9981	0.9896 to 1.0000	0.1297		0.1278
			0.6814	0.8683	0.9981	0.1298						0.6814	0.9981	0.9896 to 1.0000	0.1317		0.1298
			0.6828	0.8663	0.9981	0.1318						0.6828	0.9981	0.9896 to 1.0000	0.1337		0.1318
			0.685	0.8643	0.9981	0.1338						0.685	0.9981	0.9896 to 1.0000	0.1357		0.1338
			0.6881	0.8623	0.9981	0.1358						0.6881	0.9981	0.9896 to 1.0000	0.1377		0.1358
			0.691	0.8603	0.9981	0.1378						0.691	0.9981	0.9896 to 1.0000	0.1397		0.1378
			0.6933	0.8543	0.9981	0.1438						0.6933	0.9981	0.9896 to 1.0000	0.1457		0.1438
			0.6972	0.8523	0.9981	0.1458						0.6972	0.9981	0.9896 to 1.0000	0.1477		0.1458
			0.7029	0.8503	0.9981	0.1478						0.7029	0.9981	0.9896 to 1.0000	0.1497		0.1478
			0.7082	0.8483	0.9981	0.1498						0.7082	0.9981	0.9896 to 1.0000	0.1517		0.1498
			0.7124	0.8463	0.9981	0.1518						0.7124	0.9981	0.9896 to 1.0000	0.1537		0.1518
			0.7229	0.8423	0.9981	0.1558						0.7229	0.9981	0.9896 to 1.0000	0.1577		0.1558
			0.7334	0.8403	0.9981	0.1578						0.7334	0.9981	0.9896 to 1.0000	0.1597		0.1578
			0.7365	0.8383	0.9981	0.1598						0.7365	0.9981	0.9896 to 1.0000	0.1617		0.1598
			0.7384	0.8363	0.9981	0.1618						0.7384	0.9981	0.9896 to 1.0000	0.1637		0.1618
			0.7421	0.8323	0.9981	0.1658						0.7421	0.9981	0.9896 to 1.0000	0.1677		0.1658
			0.7453	0.8303	0.9981	0.1678						0.7453	0.9981	0.9896 to 1.0000	0.1697		0.1678
			0.7478	0.8303	0.9963	0.166						0.7478	0.9963	0.9866 to 0.9995	0.1697		0.166
			0.7505	0.8283	0.9963	0.168						0.7505	0.9963	0.9866 to 0.9995	0.1717		0.168
			0.7514	0.8263	0.9963	0.17						0.7514	0.9963	0.9866 to 0.9995	0.1737		0.17
			0.7521	0.8244	0.9963	0.1719						0.7521	0.9963	0.9866 to 0.9995	0.1756		0.1719
			0.7529	0.8224	0.9963	0.1739						0.7529	0.9963	0.9866 to 0.9995	0.1776		0.1739
			0.7538	0.8204	0.9963	0.1759						0.7538	0.9963	0.9866 to 0.9995	0.1796		0.1759
			0.756	0.8184	0.9963	0.1779						0.756	0.9963	0.9866 to 0.9995	0.1816		0.1779
			0.7586	0.8164	0.9963	0.1799						0.7586	0.9963	0.9866 to 0.9995	0.1836		0.1799
			0.7601	0.8144	0.9963	0.1819						0.7601	0.9963	0.9866 to 0.9995	0.1856		0.1819
			0.7614	0.8124	0.9963	0.1839						0.7614	0.9963	0.9866 to 0.9995	0.1876		0.1839
			0.7622	0.8084	0.9963	0.1879						0.7622	0.9963	0.9866 to 0.9995	0.1916		0.1879
			0.7659	0.8064	0.9963	0.1899						0.7659	0.9963	0.9866 to 0.9995	0.1936		0.1899
			0.7698	0.8044	0.9963	0.1919						0.7698	0.9963	0.9866 to 0.9995	0.1956		0.1919
			0.7713	0.8024	0.9963	0.1939						0.7713	0.9963	0.9866 to 0.9995	0.1976		0.1939
			0.7742	0.7984	0.9963	0.1979						0.7742	0.9963	0.9866 to 0.9995	0.2016		0.1979
			0.7765	0.7964	0.9963	0.1999						0.7765	0.9963	0.9866 to 0.9995	0.2036		0.1999
			0.7779	0.7964	0.9944	0.198						0.7779	0.9944	0.9837 to 0.9988	0.2036		0.198
			0.7807	0.7944	0.9944	0.2						0.7807	0.9944	0.9837 to 0.9988	0.2056		0.2
			0.7839	0.7924	0.9925	0.2001						0.7839	0.9925	0.9810 to 0.9980	0.2076		0.2001
			0.7855	0.7904	0.9925	0.2021						0.7855	0.9925	0.9810 to 0.9980	0.2096		0.2021
			0.7863	0.7864	0.9925	0.2061						0.7863	0.9925	0.9810 to 0.9980	0.2136		0.2061
			0.7874	0.7844	0.9925	0.2081						0.7874	0.9925	0.9810 to 0.9980	0.2156		0.2081
			0.7881	0.7824	0.9925	0.2101						0.7881	0.9925	0.9810 to 0.9980	0.2176		0.2101
			0.79	0.7804	0.9925	0.2121						0.79	0.9925	0.9810 to 0.9980	0.2196		0.2121
			0.7921	0.7784	0.9925	0.2141						0.7921	0.9925	0.9810 to 0.9980	0.2216		0.2141
			0.7928	0.7764	0.9925	0.2161						0.7928	0.9925	0.9810 to 0.9980	0.2236		0.2161
			0.7936	0.7745	0.9925	0.218						0.7936	0.9925	0.9810 to 0.9980	0.2255		0.218
			0.7944	0.7725	0.9925	0.22						0.7944	0.9925	0.9810 to 0.9980	0.2275		0.22
			0.7973	0.7705	0.9925	0.222						0.7973	0.9925	0.9810 to 0.9980	0.2295		0.222
			0.8016	0.7665	0.9925	0.226						0.8016	0.9925	0.9810 to 0.9980	0.2335		0.226
			0.8044	0.7645	0.9925	0.228						0.8044	0.9925	0.9810 to 0.9980	0.2355		0.228
			0.8066	0.7645	0.9907	0.2262						0.8066	0.9907	0.9783 to 0.9970	0.2355		0.2262
			0.8087	0.7645	0.9888	0.2243						0.8087	0.9888	0.9758 to 0.9959	0.2355		0.2243
			0.81	0.7645	0.9869	0.2224						0.81	0.9869	0.9732 to 0.9947	0.2355		0.2224
			0.8102	0.7625	0.9869	0.2244						0.8102	0.9869	0.9732 to 0.9947	0.2375		0.2244
			0.8106	0.7605	0.9869	0.2264						0.8106	0.9869	0.9732 to 0.9947	0.2395		0.2264
			0.8112	0.7565	0.9869	0.2304						0.8112	0.9869	0.9732 to 0.9947	0.2435		0.2304
			0.8117	0.7545	0.9869	0.2324						0.8117	0.9869	0.9732 to 0.9947	0.2455		0.2324
			0.8195	0.7525	0.9869	0.2344						0.8195	0.9869	0.9732 to 0.9947	0.2475		0.2344
			0.8273	0.7505	0.9869	0.2364						0.8273	0.9869	0.9732 to 0.9947	0.2495		0.2364
			0.8275	0.7485	0.9869	0.2384						0.8275	0.9869	0.9732 to 0.9947	0.2515		0.2384
			0.8303	0.7465	0.9869	0.2404						0.8303	0.9869	0.9732 to 0.9947	0.2535		0.2404
			0.8332	0.7465	0.985	0.2385						0.8332	0.985	0.9707 to 0.9935	0.2535		0.2385
			0.8343	0.7445	0.985	0.2405						0.8343	0.985	0.9707 to 0.9935	0.2555		0.2405
			0.8359	0.7425	0.985	0.2425						0.8359	0.985	0.9707 to 0.9935	0.2575		0.2425
			0.8366	0.7405	0.985	0.2445						0.8366	0.985	0.9707 to 0.9935	0.2595		0.2445
			0.8385	0.7385	0.985	0.2465						0.8385	0.985	0.9707 to 0.9935	0.2615		0.2465
			0.8412	0.7365	0.985	0.2485						0.8412	0.985	0.9707 to 0.9935	0.2635		0.2485
			0.8435	0.7365	0.9832	0.2467						0.8435	0.9832	0.9683 to 0.9923	0.2635		0.2467
			0.8461	0.7345	0.9832	0.2487						0.8461	0.9832	0.9683 to 0.9923	0.2655		0.2487
			0.8476	0.7325	0.9832	0.2507						0.8476	0.9832	0.9683 to 0.9923	0.2675		0.2507
			0.8487	0.7305	0.9832	0.2527						0.8487	0.9832	0.9683 to 0.9923	0.2695		0.2527
			0.8498	0.7305	0.9813	0.2508						0.8498	0.9813	0.9659 to 0.9910	0.2695		0.2508
			0.8507	0.7285	0.9813	0.2528						0.8507	0.9813	0.9659 to 0.9910	0.2715		0.2528
			0.8537	0.7265	0.9813	0.2548						0.8537	0.9813	0.9659 to 0.9910	0.2735		0.2548
			0.8572	0.7246	0.9813	0.2567						0.8572	0.9813	0.9659 to 0.9910	0.2754		0.2567
			0.8599	0.7226	0.9813	0.2587						0.8599	0.9813	0.9659 to 0.9910	0.2774		0.2587
			0.8618	0.7206	0.9813	0.2607						0.8618	0.9813	0.9659 to 0.9910	0.2794		0.2607
			0.8626	0.7186	0.9813	0.2627						0.8626	0.9813	0.9659 to 0.9910	0.2814		0.2627
			0.8686	0.7166	0.9813	0.2647						0.8686	0.9813	0.9659 to 0.9910	0.2834		0.2647
			0.8745	0.7166	0.9794	0.2628						0.8745	0.9794	0.9635 to 0.9897	0.2834		0.2628
			0.8753	0.7126	0.9794	0.2668						0.8753	0.9794	0.9635 to 0.9897	0.2874		0.2668
			0.876	0.7106	0.9794	0.2688						0.876	0.9794	0.9635 to 0.9897	0.2894		0.2688
			0.8776	0.7086	0.9794	0.2708						0.8776	0.9794	0.9635 to 0.9897	0.2914		0.2708
			0.88	0.7066	0.9794	0.2728						0.88	0.9794	0.9635 to 0.9897	0.2934		0.2728
			0.8819	0.7046	0.9794	0.2748						0.8819	0.9794	0.9635 to 0.9897	0.2954		0.2748
			0.8833	0.7026	0.9794	0.2768						0.8833	0.9794	0.9635 to 0.9897	0.2974		0.2768
			0.8846	0.7006	0.9794	0.2788						0.8846	0.9794	0.9635 to 0.9897	0.2994		0.2788
			0.8851	0.7006	0.9776	0.277						0.8851	0.9776	0.9611 to 0.9884	0.2994		0.277
			0.8863	0.6986	0.9776	0.279						0.8863	0.9776	0.9611 to 0.9884	0.3014		0.279
			0.8881	0.6986	0.9757	0.2771						0.8881	0.9757	0.9588 to 0.9870	0.3014		0.2771
			0.8892	0.6986	0.9738	0.2752						0.8892	0.9738	0.9565 to 0.9856	0.3014		0.2752
			0.8903	0.6986	0.972	0.2734						0.8903	0.972	0.9542 to 0.9842	0.3014		0.2734
			0.8925	0.6966	0.972	0.2754						0.8925	0.972	0.9542 to 0.9842	0.3034		0.2754
			0.8944	0.6946	0.972	0.2774						0.8944	0.972	0.9542 to 0.9842	0.3054		0.2774
			0.8987	0.6926	0.972	0.2794						0.8987	0.972	0.9542 to 0.9842	0.3074		0.2794
			0.9032	0.6926	0.9701	0.2775						0.9032	0.9701	0.9519 to 0.9828	0.3074		0.2775
			0.9043	0.6906	0.9701	0.2795						0.9043	0.9701	0.9519 to 0.9828	0.3094		0.2795
			0.9051	0.6886	0.9701	0.2815						0.9051	0.9701	0.9519 to 0.9828	0.3114		0.2815
			0.906	0.6866	0.9701	0.2835						0.906	0.9701	0.9519 to 0.9828	0.3134		0.2835
			0.907	0.6866	0.9682	0.2816						0.907	0.9682	0.9496 to 0.9814	0.3134		0.2816
			0.9076	0.6866	0.9664	0.2798						0.9076	0.9664	0.9473 to 0.9799	0.3134		0.2798
			0.9079	0.6846	0.9664	0.2818						0.9079	0.9664	0.9473 to 0.9799	0.3154		0.2818
			0.9086	0.6806	0.9664	0.2858						0.9086	0.9664	0.9473 to 0.9799	0.3194		0.2858
			0.9111	0.6786	0.9664	0.2878						0.9111	0.9664	0.9473 to 0.9799	0.3214		0.2878
			0.9153	0.6786	0.9645	0.2859						0.9153	0.9645	0.9451 to 0.9785	0.3214		0.2859
			0.9198	0.6766	0.9645	0.2879						0.9198	0.9645	0.9451 to 0.9785	0.3234		0.2879
			0.9226	0.6747	0.9645	0.2898						0.9226	0.9645	0.9451 to 0.9785	0.3253		0.2898
			0.9258	0.6727	0.9645	0.2918						0.9258	0.9645	0.9451 to 0.9785	0.3273		0.2918
			0.931	0.6707	0.9645	0.2938						0.931	0.9645	0.9451 to 0.9785	0.3293		0.2938
			0.9385	0.6687	0.9645	0.2958						0.9385	0.9645	0.9451 to 0.9785	0.3313		0.2958
			0.9445	0.6667	0.9645	0.2978						0.9445	0.9645	0.9451 to 0.9785	0.3333		0.2978
			0.9456	0.6647	0.9645	0.2998						0.9456	0.9645	0.9451 to 0.9785	0.3353		0.2998
			0.9473	0.6627	0.9645	0.3018						0.9473	0.9645	0.9451 to 0.9785	0.3373		0.3018
			0.9492	0.6607	0.9645	0.3038						0.9492	0.9645	0.9451 to 0.9785	0.3393		0.3038
			0.9514	0.6587	0.9645	0.3058						0.9514	0.9645	0.9451 to 0.9785	0.3413		0.3058
			0.9534	0.6587	0.9626	0.3039						0.9534	0.9626	0.9429 to 0.9770	0.3413		0.3039
			0.9546	0.6567	0.9626	0.3059						0.9546	0.9626	0.9429 to 0.9770	0.3433		0.3059
			0.9568	0.6567	0.9607	0.304						0.9568	0.9607	0.9406 to 0.9755	0.3433		0.304
			0.9581	0.6547	0.9607	0.306						0.9581	0.9607	0.9406 to 0.9755	0.3453		0.306
			0.959	0.6527	0.9607	0.308						0.959	0.9607	0.9406 to 0.9755	0.3473		0.308
			0.9603	0.6507	0.9607	0.31						0.9603	0.9607	0.9406 to 0.9755	0.3493		0.31
			0.9617	0.6487	0.9607	0.312						0.9617	0.9607	0.9406 to 0.9755	0.3513		0.312
			0.964	0.6467	0.9607	0.314						0.964	0.9607	0.9406 to 0.9755	0.3533		0.314
			0.9686	0.6447	0.9607	0.316						0.9686	0.9607	0.9406 to 0.9755	0.3553		0.316
			0.9718	0.6447	0.9589	0.3142						0.9718	0.9589	0.9384 to 0.9741	0.3553		0.3142
			0.9751	0.6427	0.9589	0.3162						0.9751	0.9589	0.9384 to 0.9741	0.3573		0.3162
			0.9787	0.6407	0.9589	0.3182						0.9787	0.9589	0.9384 to 0.9741	0.3593		0.3182
			0.9801	0.6387	0.9589	0.3202						0.9801	0.9589	0.9384 to 0.9741	0.3613		0.3202
			0.9818	0.6367	0.9589	0.3222						0.9818	0.9589	0.9384 to 0.9741	0.3633		0.3222
			0.983	0.6367	0.957	0.3203						0.983	0.957	0.9362 to 0.9726	0.3633		0.3203
			0.9837	0.6367	0.9551	0.3184						0.9837	0.9551	0.9340 to 0.9710	0.3633		0.3184
			0.9857	0.6347	0.9551	0.3204						0.9857	0.9551	0.9340 to 0.9710	0.3653		0.3204
			0.989	0.6347	0.9533	0.3186						0.989	0.9533	0.9318 to 0.9695	0.3653		0.3186
			0.9911	0.6327	0.9533	0.3206						0.9911	0.9533	0.9318 to 0.9695	0.3673		0.3206
			0.9918	0.6307	0.9533	0.3226						0.9918	0.9533	0.9318 to 0.9695	0.3693		0.3226
			0.9932	0.6287	0.9533	0.3246						0.9932	0.9533	0.9318 to 0.9695	0.3713		0.3246
			0.9972	0.6267	0.9533	0.3266						0.9972	0.9533	0.9318 to 0.9695	0.3733		0.3266
			1.0013	0.6128	0.9514	0.3386						1.001	0.9514	0.9296 to 0.9680	0.3872		0.3386
			1.0048	0.6108	0.9514	0.3406						1.005	0.9514	0.9296 to 0.9680	0.3892		0.3406
			1.0075	0.6088	0.9514	0.3426						1.008	0.9514	0.9296 to 0.9680	0.3912		0.3426
			1.0114	0.6068	0.9514	0.3446						1.011	0.9514	0.9296 to 0.9680	0.3932		0.3446
			1.0151	0.6048	0.9514	0.3466						1.015	0.9514	0.9296 to 0.9680	0.3952		0.3466
			1.0187	0.6048	0.9495	0.3447						1.019	0.9495	0.9274 to 0.9665	0.3952		0.3447
			1.0222	0.6028	0.9495	0.3467						1.022	0.9495	0.9274 to 0.9665	0.3972		0.3467
			1.0245	0.6008	0.9495	0.3487						1.025	0.9495	0.9274 to 0.9665	0.3992		0.3487
			1.0265	0.5988	0.9495	0.3507						1.027	0.9495	0.9274 to 0.9665	0.4012		0.3507
			1.0273	0.5988	0.9477	0.3489						1.027	0.9477	0.9252 to 0.9649	0.4012		0.3489
			1.0312	0.5988	0.9458	0.347						1.031	0.9458	0.9231 to 0.9634	0.4012		0.347
			1.0372	0.5968	0.9458	0.349						1.037	0.9458	0.9231 to 0.9634	0.4032		0.349
			1.041	0.5948	0.9458	0.351						1.041	0.9458	0.9231 to 0.9634	0.4052		0.351
			1.0428	0.5928	0.9458	0.353						1.043	0.9458	0.9231 to 0.9634	0.4072		0.353
			1.0448	0.5928	0.9439	0.3511						1.045	0.9439	0.9209 to 0.9619	0.4072		0.3511
			1.048	0.5928	0.9421	0.3493						1.048	0.9421	0.9188 to 0.9603	0.4072		0.3493
			1.051	0.5928	0.9402	0.3474						1.051	0.9402	0.9166 to 0.9587	0.4072		0.3474
			1.0541	0.5908	0.9402	0.3494						1.054	0.9402	0.9166 to 0.9587	0.4092		0.3494
			1.0561	0.5908	0.9383	0.3475						1.056	0.9383	0.9145 to 0.9572	0.4092		0.3475
			1.057	0.5908	0.9364	0.3456						1.057	0.9364	0.9123 to 0.9556	0.4092		0.3456
			1.0584	0.5888	0.9364	0.3476						1.058	0.9364	0.9123 to 0.9556	0.4112		0.3476
			1.0606	0.5868	0.9364	0.3496						1.061	0.9364	0.9123 to 0.9556	0.4132		0.3496
			1.0664	0.5848	0.9364	0.3516						1.066	0.9364	0.9123 to 0.9556	0.4152		0.3516
			1.0709	0.5828	0.9364	0.3536						1.071	0.9364	0.9123 to 0.9556	0.4172		0.3536
			1.072	0.5828	0.9327	0.3499						1.072	0.9327	0.9081 to 0.9524	0.4172		0.3499
			1.0733	0.5808	0.9327	0.3519						1.073	0.9327	0.9081 to 0.9524	0.4192		0.3519
			1.0741	0.5808	0.9308	0.35						1.074	0.9308	0.9059 to 0.9508	0.4192		0.35
			1.0743	0.5808	0.929	0.3482						1.074	0.929	0.9038 to 0.9492	0.4192		0.3482
			1.0767	0.5788	0.929	0.3502						1.077	0.929	0.9038 to 0.9492	0.4212		0.3502
			1.0792	0.5768	0.929	0.3522						1.079	0.929	0.9038 to 0.9492	0.4232		0.3522
			1.0796	0.5749	0.929	0.3541						1.08	0.929	0.9038 to 0.9492	0.4251		0.3541
			1.0806	0.5729	0.929	0.3561						1.081	0.929	0.9038 to 0.9492	0.4271		0.3561
			1.0818	0.5709	0.929	0.3581						1.082	0.929	0.9038 to 0.9492	0.4291		0.3581
			1.0821	0.5689	0.929	0.3601						1.082	0.929	0.9038 to 0.9492	0.4311		0.3601
			1.0826	0.5669	0.929	0.3621						1.083	0.929	0.9038 to 0.9492	0.4331		0.3621
			1.0867	0.5669	0.9271	0.3602						1.087	0.9271	0.9017 to 0.9477	0.4331		0.3602
			1.0907	0.5649	0.9271	0.3622						1.091	0.9271	0.9017 to 0.9477	0.4351		0.3622
			1.0918	0.5629	0.9271	0.3642						1.092	0.9271	0.9017 to 0.9477	0.4371		0.3642
			1.0931	0.5629	0.9252	0.3623						1.093	0.9252	0.8996 to 0.9461	0.4371		0.3623
			1.094	0.5629	0.9234	0.3605						1.094	0.9234	0.8975 to 0.9444	0.4371		0.3605
			1.0956	0.5609	0.9234	0.3625						1.096	0.9234	0.8975 to 0.9444	0.4391		0.3625
			1.1002	0.5589	0.9234	0.3645						1.1	0.9234	0.8975 to 0.9444	0.4411		0.3645
			1.1037	0.5569	0.9234	0.3665						1.104	0.9234	0.8975 to 0.9444	0.4431		0.3665
			1.1041	0.5569	0.9215	0.3646						1.104	0.9215	0.8954 to 0.9428	0.4431		0.3646
			1.108	0.5549	0.9215	0.3666						1.108	0.9215	0.8954 to 0.9428	0.4451		0.3666
			1.1126	0.5549	0.9196	0.3647						1.113	0.9196	0.8933 to 0.9412	0.4451		0.3647
			1.1145	0.5529	0.9196	0.3667						1.115	0.9196	0.8933 to 0.9412	0.4471		0.3667
			1.1179	0.5509	0.9196	0.3687						1.118	0.9196	0.8933 to 0.9412	0.4491		0.3687
			1.1206	0.5509	0.9178	0.3669						1.121	0.9178	0.8912 to 0.9396	0.4491		0.3669
			1.1209	0.5489	0.9178	0.3689						1.121	0.9178	0.8912 to 0.9396	0.4511		0.3689
			1.121	0.5489	0.9159	0.367						1.121	0.9159	0.8891 to 0.9380	0.4511		0.367
			1.1215	0.5489	0.914	0.3651						1.122	0.914	0.8870 to 0.9364	0.4511		0.3651
			1.1221	0.5489	0.9121	0.3632						1.122	0.9121	0.8849 to 0.9347	0.4511		0.3632
			1.1223	0.5489	0.9103	0.3614						1.122	0.9103	0.8828 to 0.9331	0.4511		0.3614
			1.123	0.5469	0.9103	0.3634						1.123	0.9103	0.8828 to 0.9331	0.4531		0.3634
			1.1241	0.5449	0.9103	0.3654						1.124	0.9103	0.8828 to 0.9331	0.4551		0.3654
			1.1248	0.5449	0.9084	0.3635						1.125	0.9084	0.8807 to 0.9315	0.4551		0.3635
			1.129	0.5409	0.9065	0.3656						1.129	0.9065	0.8786 to 0.9298	0.4591		0.3656
			1.1353	0.5389	0.9065	0.3676						1.135	0.9065	0.8786 to 0.9298	0.4611		0.3676
			1.1378	0.5369	0.9065	0.3696						1.138	0.9065	0.8786 to 0.9298	0.4631		0.3696
			1.1404	0.5349	0.9065	0.3716						1.14	0.9065	0.8786 to 0.9298	0.4651		0.3716
			1.1437	0.5329	0.9065	0.3736						1.144	0.9065	0.8786 to 0.9298	0.4671		0.3736
			1.1451	0.5309	0.9065	0.3756						1.145	0.9065	0.8786 to 0.9298	0.4691		0.3756
			1.1493	0.5289	0.9065	0.3776						1.149	0.9065	0.8786 to 0.9298	0.4711		0.3776
			1.1537	0.5269	0.9065	0.3796						1.154	0.9065	0.8786 to 0.9298	0.4731		0.3796
			1.1574	0.525	0.9065	0.3815						1.157	0.9065	0.8786 to 0.9298	0.475		0.3815
			1.1605	0.523	0.9065	0.3835						1.16	0.9065	0.8786 to 0.9298	0.477		0.3835
			1.1608	0.519	0.9065	0.3875						1.161	0.9065	0.8786 to 0.9298	0.481		0.3875
			1.1614	0.517	0.9065	0.3895						1.161	0.9065	0.8786 to 0.9298	0.483		0.3895
			1.1624	0.517	0.9047	0.3877						1.162	0.9047	0.8766 to 0.9282	0.483		0.3877
			1.1638	0.515	0.9047	0.3897						1.164	0.9047	0.8766 to 0.9282	0.485		0.3897
			1.1649	0.513	0.9047	0.3917						1.165	0.9047	0.8766 to 0.9282	0.487		0.3917
			1.1655	0.511	0.9047	0.3937						1.165	0.9047	0.8766 to 0.9282	0.489		0.3937
			1.1671	0.509	0.9047	0.3957						1.167	0.9047	0.8766 to 0.9282	0.491		0.3957
			1.1688	0.507	0.9047	0.3977						1.169	0.9047	0.8766 to 0.9282	0.493		0.3977
			1.1697	0.507	0.9028	0.3958						1.17	0.9028	0.8745 to 0.9266	0.493		0.3958
			1.1713	0.507	0.9009	0.3939						1.171	0.9009	0.8724 to 0.9249	0.493		0.3939
			1.1774	0.507	0.8991	0.3921						1.177	0.8991	0.8704 to 0.9233	0.493		0.3921
			1.1832	0.507	0.8972	0.3902						1.183	0.8972	0.8683 to 0.9216	0.493		0.3902
			1.1856	0.505	0.8972	0.3922						1.186	0.8972	0.8683 to 0.9216	0.495		0.3922
			1.1875	0.503	0.8972	0.3942						1.188	0.8972	0.8683 to 0.9216	0.497		0.3942
			1.1915	0.503	0.8953	0.3923						1.191	0.8953	0.8662 to 0.9200	0.497		0.3923
			1.1951	0.503	0.8935	0.3905						1.195	0.8935	0.8642 to 0.9183	0.497		0.3905
			1.1955	0.501	0.8935	0.3925						1.195	0.8935	0.8642 to 0.9183	0.499		0.3925
			1.1973	0.501	0.8916	0.3906						1.197	0.8916	0.8621 to 0.9166	0.499		0.3906
			1.1991	0.501	0.8897	0.3887						1.199	0.8897	0.8601 to 0.9150	0.499		0.3887
			1.1994	0.501	0.8879	0.3869						1.199	0.8879	0.8580 to 0.9133	0.499		0.3869
			1.1996	0.499	0.8879	0.3889						1.2	0.8879	0.8580 to 0.9133	0.501		0.3889
			1.1998	0.497	0.8879	0.3909						1.2	0.8879	0.8580 to 0.9133	0.503		0.3909
			1.2015	0.497	0.886	0.389						1.202	0.886	0.8560 to 0.9117	0.503		0.389
			1.2051	0.495	0.886	0.391						1.205	0.886	0.8560 to 0.9117	0.505		0.391
			1.2078	0.493	0.886	0.393						1.208	0.886	0.8560 to 0.9117	0.507		0.393
			1.2088	0.491	0.886	0.395						1.209	0.886	0.8560 to 0.9117	0.509		0.395
			1.2113	0.491	0.8841	0.3931						1.211	0.8841	0.8539 to 0.9100	0.509		0.3931
			1.214	0.489	0.8841	0.3951						1.214	0.8841	0.8539 to 0.9100	0.511		0.3951
			1.2147	0.489	0.8822	0.3932						1.215	0.8822	0.8519 to 0.9083	0.511		0.3932
			1.2171	0.489	0.8804	0.3914						1.217	0.8804	0.8498 to 0.9066	0.511		0.3914
			1.2206	0.487	0.8804	0.3934						1.221	0.8804	0.8498 to 0.9066	0.513		0.3934
			1.2235	0.487	0.8785	0.3915						1.224	0.8785	0.8478 to 0.9050	0.513		0.3915
			1.2268	0.485	0.8785	0.3935						1.227	0.8785	0.8478 to 0.9050	0.515		0.3935
			1.2296	0.485	0.8766	0.3916						1.23	0.8766	0.8457 to 0.9033	0.515		0.3916
			1.2319	0.483	0.8766	0.3936						1.232	0.8766	0.8457 to 0.9033	0.517		0.3936
			1.2331	0.481	0.8766	0.3956						1.233	0.8766	0.8457 to 0.9033	0.519		0.3956
			1.2344	0.481	0.8748	0.3938						1.234	0.8748	0.8437 to 0.9016	0.519		0.3938
			1.2364	0.479	0.8748	0.3958						1.236	0.8748	0.8437 to 0.9016	0.521		0.3958
			1.2382	0.477	0.8748	0.3978						1.238	0.8748	0.8437 to 0.9016	0.523		0.3978
			1.2403	0.477	0.8729	0.3959						1.24	0.8729	0.8417 to 0.8999	0.523		0.3959
			1.2434	0.477	0.871	0.394						1.243	0.871	0.8396 to 0.8982	0.523		0.394
			1.2459	0.477	0.8692	0.3922						1.246	0.8692	0.8376 to 0.8966	0.523		0.3922
			1.2471	0.475	0.8692	0.3942						1.247	0.8692	0.8376 to 0.8966	0.525		0.3942
			1.249	0.475	0.8673	0.3923						1.249	0.8673	0.8356 to 0.8949	0.525		0.3923
			1.2518	0.4731	0.8673	0.3942						1.252	0.8673	0.8356 to 0.8949	0.5269		0.3942
			1.2558	0.4711	0.8673	0.3962						1.256	0.8673	0.8356 to 0.8949	0.5289		0.3962
			1.2624	0.4691	0.8673	0.3982						1.262	0.8673	0.8356 to 0.8949	0.5309		0.3982
			1.267	0.4671	0.8673	0.4002						1.267	0.8673	0.8356 to 0.8949	0.5329		0.4002
			1.272	0.4651	0.8673	0.4022						1.272	0.8673	0.8356 to 0.8949	0.5349		0.4022
			1.2768	0.4631	0.8673	0.4042						1.277	0.8673	0.8356 to 0.8949	0.5369		0.4042
			1.2795	0.4631	0.8654	0.4023						1.28	0.8654	0.8335 to 0.8932	0.5369		0.4023
			1.2823	0.4611	0.8654	0.4043						1.282	0.8654	0.8335 to 0.8932	0.5389		0.4043
			1.2825	0.4611	0.8636	0.4025						1.283	0.8636	0.8315 to 0.8915	0.5389		0.4025
			1.284	0.4611	0.8617	0.4006						1.284	0.8617	0.8295 to 0.8898	0.5389		0.4006
			1.2858	0.4591	0.8617	0.4026						1.286	0.8617	0.8295 to 0.8898	0.5409		0.4026
			1.2875	0.4591	0.8598	0.4007						1.288	0.8598	0.8275 to 0.8881	0.5409		0.4007
			1.2908	0.4571	0.8598	0.4027						1.291	0.8598	0.8275 to 0.8881	0.5429		0.4027
			1.293	0.4551	0.8598	0.4047						1.293	0.8598	0.8275 to 0.8881	0.5449		0.4047
			1.2937	0.4531	0.8598	0.4067						1.294	0.8598	0.8275 to 0.8881	0.5469		0.4067
			1.2975	0.4511	0.8598	0.4087						1.297	0.8598	0.8275 to 0.8881	0.5489		0.4087
			1.3025	0.4491	0.8598	0.4107						1.303	0.8598	0.8275 to 0.8881	0.5509		0.4107
			1.306	0.4471	0.8598	0.4127						1.306	0.8598	0.8275 to 0.8881	0.5529		0.4127
			1.309	0.4451	0.8598	0.4147						1.309	0.8598	0.8275 to 0.8881	0.5549		0.4147
			1.312	0.4431	0.8598	0.4167						1.312	0.8598	0.8275 to 0.8881	0.5569		0.4167
			1.3137	0.4431	0.8579	0.4148						1.314	0.8579	0.8255 to 0.8864	0.5569		0.4148
			1.314	0.4431	0.8561	0.413						1.314	0.8561	0.8234 to 0.8847	0.5569		0.413
			1.3149	0.4411	0.8561	0.415						1.315	0.8561	0.8234 to 0.8847	0.5589		0.415
			1.3167	0.4391	0.8561	0.417						1.317	0.8561	0.8234 to 0.8847	0.5609		0.417
			1.3209	0.4391	0.8542	0.4151						1.321	0.8542	0.8214 to 0.8830	0.5609		0.4151
			1.3245	0.4371	0.8542	0.4171						1.325	0.8542	0.8214 to 0.8830	0.5629		0.4171
			1.3254	0.4371	0.8523	0.4152						1.325	0.8523	0.8194 to 0.8813	0.5629		0.4152
			1.3261	0.4351	0.8523	0.4172						1.326	0.8523	0.8194 to 0.8813	0.5649		0.4172
			1.3274	0.4311	0.8523	0.4212						1.327	0.8523	0.8194 to 0.8813	0.5689		0.4212
			1.3291	0.4291	0.8523	0.4232						1.329	0.8523	0.8194 to 0.8813	0.5709		0.4232
			1.3316	0.4271	0.8523	0.4252						1.332	0.8523	0.8194 to 0.8813	0.5729		0.4252
			1.3337	0.4212	0.8486	0.4274						1.334	0.8486	0.8154 to 0.8779	0.5788		0.4274
			1.335	0.4212	0.8467	0.4255						1.335	0.8467	0.8134 to 0.8762	0.5788		0.4255
			1.3377	0.4212	0.8449	0.4237						1.338	0.8449	0.8114 to 0.8745	0.5788		0.4237
			1.3401	0.4192	0.8449	0.4257						1.34	0.8449	0.8114 to 0.8745	0.5808		0.4257
			1.3408	0.4192	0.843	0.4238						1.341	0.843	0.8093 to 0.8728	0.5808		0.4238
			1.3413	0.4192	0.8411	0.4219						1.341	0.8411	0.8073 to 0.8711	0.5808		0.4219
			1.3425	0.4192	0.8393	0.4201						1.342	0.8393	0.8053 to 0.8694	0.5808		0.4201
			1.3448	0.4192	0.8374	0.4182						1.345	0.8374	0.8033 to 0.8677	0.5808		0.4182
			1.3485	0.4172	0.8374	0.4202						1.348	0.8374	0.8033 to 0.8677	0.5828		0.4202
			1.3511	0.4152	0.8374	0.4222						1.351	0.8374	0.8033 to 0.8677	0.5848		0.4222
			1.3517	0.4132	0.8355	0.4223						1.352	0.8355	0.8013 to 0.8659	0.5868		0.4223
			1.3523	0.4132	0.8336	0.4204						1.352	0.8336	0.7993 to 0.8642	0.5868		0.4204
			1.3533	0.4112	0.8336	0.4224						1.353	0.8336	0.7993 to 0.8642	0.5888		0.4224
			1.3545	0.4112	0.8318	0.4206						1.355	0.8318	0.7973 to 0.8625	0.5888		0.4206
			1.356	0.4092	0.8318	0.4226						1.356	0.8318	0.7973 to 0.8625	0.5908		0.4226
			1.3588	0.4092	0.8299	0.4207						1.359	0.8299	0.7953 to 0.8608	0.5908		0.4207
			1.3608	0.4092	0.828	0.4188						1.361	0.828	0.7933 to 0.8591	0.5908		0.4188
			1.364	0.4072	0.828	0.4208						1.364	0.828	0.7933 to 0.8591	0.5928		0.4208
			1.3677	0.4052	0.828	0.4228						1.368	0.828	0.7933 to 0.8591	0.5948		0.4228
			1.3696	0.4052	0.8262	0.421						1.37	0.8262	0.7913 to 0.8573	0.5948		0.421
			1.3708	0.4032	0.8262	0.423						1.371	0.8262	0.7913 to 0.8573	0.5968		0.423
			1.3717	0.4032	0.8243	0.4211						1.372	0.8243	0.7894 to 0.8556	0.5968		0.4211
			1.3728	0.4012	0.8243	0.4231						1.373	0.8243	0.7894 to 0.8556	0.5988		0.4231
			1.3731	0.3992	0.8243	0.4251						1.373	0.8243	0.7894 to 0.8556	0.6008		0.4251
			1.3768	0.3992	0.8224	0.4232						1.377	0.8224	0.7874 to 0.8539	0.6008		0.4232
			1.3808	0.3972	0.8224	0.4252						1.381	0.8224	0.7874 to 0.8539	0.6028		0.4252
			1.3816	0.3952	0.8224	0.4272						1.382	0.8224	0.7874 to 0.8539	0.6048		0.4272
			1.3848	0.3952	0.8206	0.4254						1.385	0.8206	0.7854 to 0.8522	0.6048		0.4254
			1.3885	0.3932	0.8206	0.4274						1.388	0.8206	0.7854 to 0.8522	0.6068		0.4274
			1.3903	0.3912	0.8206	0.4294						1.39	0.8206	0.7854 to 0.8522	0.6088		0.4294
			1.3922	0.3892	0.8206	0.4314						1.392	0.8206	0.7854 to 0.8522	0.6108		0.4314
			1.3944	0.3892	0.8187	0.4295						1.394	0.8187	0.7834 to 0.8504	0.6108		0.4295
			1.3958	0.3872	0.8187	0.4315						1.396	0.8187	0.7834 to 0.8504	0.6128		0.4315
			1.3966	0.3872	0.8168	0.4296						1.397	0.8168	0.7814 to 0.8487	0.6128		0.4296
			1.4	0.3852	0.8168	0.4316						1.4	0.8168	0.7814 to 0.8487	0.6148		0.4316
			1.4041	0.3832	0.8168	0.4336						1.404	0.8168	0.7814 to 0.8487	0.6168		0.4336
			1.4055	0.3832	0.815	0.4318						1.406	0.815	0.7794 to 0.8470	0.6168		0.4318
			1.4059	0.3832	0.8131	0.4299						1.406	0.8131	0.7774 to 0.8452	0.6168		0.4299
			1.4068	0.3812	0.8131	0.4319						1.407	0.8131	0.7774 to 0.8452	0.6188		0.4319
			1.4084	0.3792	0.8112	0.432						1.408	0.8112	0.7754 to 0.8435	0.6208		0.432
			1.4111	0.3792	0.8093	0.4301						1.411	0.8093	0.7735 to 0.8418	0.6208		0.4301
			1.4129	0.3792	0.8075	0.4283						1.413	0.8075	0.7715 to 0.8400	0.6208		0.4283
			1.4151	0.3792	0.8056	0.4264						1.415	0.8056	0.7695 to 0.8383	0.6208		0.4264
			1.4175	0.3772	0.8056	0.4284						1.417	0.8056	0.7695 to 0.8383	0.6228		0.4284
			1.4193	0.3752	0.8056	0.4304						1.419	0.8056	0.7695 to 0.8383	0.6248		0.4304
			1.421	0.3752	0.8037	0.4285						1.421	0.8037	0.7675 to 0.8366	0.6248		0.4285
			1.4211	0.3733	0.8019	0.4286						1.421	0.8019	0.7655 to 0.8348	0.6267		0.4286
			1.4222	0.3733	0.8	0.4267						1.422	0.8	0.7636 to 0.8331	0.6267		0.4267
			1.4248	0.3733	0.7981	0.4248						1.425	0.7981	0.7616 to 0.8314	0.6267		0.4248
			1.4305	0.3713	0.7981	0.4268						1.431	0.7981	0.7616 to 0.8314	0.6287		0.4268
			1.4353	0.3713	0.7963	0.425						1.435	0.7963	0.7596 to 0.8296	0.6287		0.425
			1.4359	0.3693	0.7963	0.427						1.436	0.7963	0.7596 to 0.8296	0.6307		0.427
			1.4375	0.3693	0.7944	0.4251						1.438	0.7944	0.7576 to 0.8279	0.6307		0.4251
			1.439	0.3693	0.7925	0.4232						1.439	0.7925	0.7557 to 0.8261	0.6307		0.4232
			1.4408	0.3693	0.7907	0.4214						1.441	0.7907	0.7537 to 0.8244	0.6307		0.4214
			1.4427	0.3673	0.7907	0.4234						1.443	0.7907	0.7537 to 0.8244	0.6327		0.4234
			1.4443	0.3653	0.7907	0.4254						1.444	0.7907	0.7537 to 0.8244	0.6347		0.4254
			1.4459	0.3653	0.7888	0.4235						1.446	0.7888	0.7517 to 0.8226	0.6347		0.4235
			1.447	0.3653	0.7869	0.4216						1.447	0.7869	0.7497 to 0.8209	0.6347		0.4216
			1.4505	0.3653	0.785	0.4197						1.451	0.785	0.7478 to 0.8191	0.6347		0.4197
			1.4538	0.3633	0.785	0.4217						1.454	0.785	0.7478 to 0.8191	0.6367		0.4217
			1.4568	0.3633	0.7832	0.4199						1.457	0.7832	0.7458 to 0.8174	0.6367		0.4199
			1.4592	0.3613	0.7832	0.4219						1.459	0.7832	0.7458 to 0.8174	0.6387		0.4219
			1.4594	0.3593	0.7832	0.4239						1.459	0.7832	0.7458 to 0.8174	0.6407		0.4239
			1.4603	0.3593	0.7813	0.422						1.46	0.7813	0.7438 to 0.8156	0.6407		0.422
			1.4613	0.3573	0.7813	0.424						1.461	0.7813	0.7438 to 0.8156	0.6427		0.424
			1.462	0.3513	0.7813	0.43						1.462	0.7813	0.7438 to 0.8156	0.6487		0.43
			1.4627	0.3513	0.7794	0.4281						1.463	0.7794	0.7419 to 0.8139	0.6487		0.4281
			1.4634	0.3493	0.7794	0.4301						1.463	0.7794	0.7419 to 0.8139	0.6507		0.4301
			1.464	0.3493	0.7776	0.4283						1.464	0.7776	0.7399 to 0.8121	0.6507		0.4283
			1.4698	0.3473	0.7776	0.4303						1.47	0.7776	0.7399 to 0.8121	0.6527		0.4303
			1.4772	0.3473	0.7757	0.4284						1.477	0.7757	0.7379 to 0.8104	0.6527		0.4284
			1.4792	0.3473	0.7738	0.4265						1.479	0.7738	0.7360 to 0.8086	0.6527		0.4265
			1.482	0.3473	0.772	0.4247						1.482	0.772	0.7340 to 0.8069	0.6527		0.4247
			1.4896	0.3453	0.772	0.4267						1.49	0.772	0.7340 to 0.8069	0.6547		0.4267
			1.4953	0.3433	0.772	0.4287						1.495	0.772	0.7340 to 0.8069	0.6567		0.4287
			1.4972	0.3413	0.772	0.4307						1.497	0.772	0.7340 to 0.8069	0.6587		0.4307
			1.4992	0.3393	0.772	0.4327						1.499	0.772	0.7340 to 0.8069	0.6607		0.4327
			1.5015	0.3353	0.772	0.4367						1.502	0.772	0.7340 to 0.8069	0.6647		0.4367
			1.5054	0.3353	0.7701	0.4348						1.505	0.7701	0.7321 to 0.8051	0.6647		0.4348
			1.5079	0.3333	0.7701	0.4368						1.508	0.7701	0.7321 to 0.8051	0.6667		0.4368
			1.5096	0.3313	0.7701	0.4388						1.51	0.7701	0.7321 to 0.8051	0.6687		0.4388
			1.516	0.3313	0.7682	0.4369						1.516	0.7682	0.7301 to 0.8033	0.6687		0.4369
			1.522	0.3313	0.7664	0.4351						1.522	0.7664	0.7281 to 0.8016	0.6687		0.4351
			1.5247	0.3313	0.7645	0.4332						1.525	0.7645	0.7262 to 0.7998	0.6687		0.4332
			1.5268	0.3313	0.7626	0.4313						1.527	0.7626	0.7242 to 0.7981	0.6687		0.4313
			1.5293	0.3293	0.7626	0.4333						1.529	0.7626	0.7242 to 0.7981	0.6707		0.4333
			1.5335	0.3273	0.7626	0.4353						1.533	0.7626	0.7242 to 0.7981	0.6727		0.4353
			1.536	0.3273	0.7607	0.4334						1.536	0.7607	0.7223 to 0.7963	0.6727		0.4334
			1.5378	0.3273	0.7589	0.4316						1.538	0.7589	0.7203 to 0.7945	0.6727		0.4316
			1.5412	0.3273	0.757	0.4297						1.541	0.757	0.7184 to 0.7928	0.6727		0.4297
			1.5443	0.3253	0.757	0.4317						1.544	0.757	0.7184 to 0.7928	0.6747		0.4317
			1.5456	0.3234	0.757	0.4336						1.546	0.757	0.7184 to 0.7928	0.6766		0.4336
			1.546	0.3214	0.757	0.4356						1.546	0.757	0.7184 to 0.7928	0.6786		0.4356
			1.547	0.3194	0.757	0.4376						1.547	0.757	0.7184 to 0.7928	0.6806		0.4376
			1.5517	0.3174	0.757	0.4396						1.552	0.757	0.7184 to 0.7928	0.6826		0.4396
			1.5588	0.3154	0.757	0.4416						1.559	0.757	0.7184 to 0.7928	0.6846		0.4416
			1.5622	0.3154	0.7551	0.4397						1.562	0.7551	0.7164 to 0.7910	0.6846		0.4397
			1.5633	0.3154	0.7533	0.4379						1.563	0.7533	0.7145 to 0.7893	0.6846		0.4379
			1.5664	0.3134	0.7533	0.4399						1.566	0.7533	0.7145 to 0.7893	0.6866		0.4399
			1.5697	0.3134	0.7514	0.438						1.57	0.7514	0.7125 to 0.7875	0.6866		0.438
			1.5723	0.3134	0.7495	0.4361						1.572	0.7495	0.7106 to 0.7857	0.6866		0.4361
			1.5754	0.3134	0.7477	0.4343						1.575	0.7477	0.7086 to 0.7839	0.6866		0.4343
			1.5779	0.3114	0.7477	0.4363						1.578	0.7477	0.7086 to 0.7839	0.6886		0.4363
			1.5815	0.3094	0.7477	0.4383						1.581	0.7477	0.7086 to 0.7839	0.6906		0.4383
			1.5847	0.3094	0.7458	0.4364						1.585	0.7458	0.7067 to 0.7822	0.6906		0.4364
			1.5858	0.3094	0.7439	0.4345						1.586	0.7439	0.7047 to 0.7804	0.6906		0.4345
			1.5864	0.3074	0.7439	0.4365						1.586	0.7439	0.7047 to 0.7804	0.6926		0.4365
			1.5872	0.3054	0.7439	0.4385						1.587	0.7439	0.7047 to 0.7804	0.6946		0.4385
			1.5905	0.3054	0.7421	0.4367						1.59	0.7421	0.7028 to 0.7786	0.6946		0.4367
			1.5945	0.3034	0.7421	0.4387						1.595	0.7421	0.7028 to 0.7786	0.6966		0.4387
			1.5963	0.3014	0.7421	0.4407						1.596	0.7421	0.7028 to 0.7786	0.6986		0.4407
			1.5972	0.3014	0.7402	0.4388						1.597	0.7402	0.7008 to 0.7769	0.6986		0.4388
			1.5988	0.3014	0.7383	0.4369						1.599	0.7383	0.6989 to 0.7751	0.6986		0.4369
			1.6012	0.2994	0.7383	0.4389						1.601	0.7383	0.6989 to 0.7751	0.7006		0.4389
			1.6025	0.2974	0.7383	0.4409						1.602	0.7383	0.6989 to 0.7751	0.7026		0.4409
			1.6034	0.2954	0.7383	0.4429						1.603	0.7383	0.6989 to 0.7751	0.7046		0.4429
			1.605	0.2934	0.7383	0.4449						1.605	0.7383	0.6989 to 0.7751	0.7066		0.4449
			1.6062	0.2914	0.7383	0.4469						1.606	0.7383	0.6989 to 0.7751	0.7086		0.4469
			1.6088	0.2894	0.7383	0.4489						1.609	0.7383	0.6989 to 0.7751	0.7106		0.4489
			1.6132	0.2874	0.7383	0.4509						1.613	0.7383	0.6989 to 0.7751	0.7126		0.4509
			1.6165	0.2874	0.7364	0.449						1.617	0.7364	0.6969 to 0.7733	0.7126		0.449
			1.6182	0.2854	0.7364	0.451						1.618	0.7364	0.6969 to 0.7733	0.7146		0.451
			1.6218	0.2854	0.7346	0.4492						1.622	0.7346	0.6950 to 0.7715	0.7146		0.4492
			1.6256	0.2814	0.7346	0.4532						1.626	0.7346	0.6950 to 0.7715	0.7186		0.4532
			1.6278	0.2814	0.7327	0.4513						1.628	0.7327	0.6931 to 0.7698	0.7186		0.4513
			1.631	0.2794	0.7327	0.4533						1.631	0.7327	0.6931 to 0.7698	0.7206		0.4533
			1.6332	0.2774	0.7327	0.4553						1.633	0.7327	0.6931 to 0.7698	0.7226		0.4553
			1.6339	0.2754	0.7327	0.4573						1.634	0.7327	0.6931 to 0.7698	0.7246		0.4573
			1.636	0.2754	0.7308	0.4554						1.636	0.7308	0.6911 to 0.7680	0.7246		0.4554
			1.6383	0.2735	0.7308	0.4573						1.638	0.7308	0.6911 to 0.7680	0.7265		0.4573
			1.6388	0.2715	0.7308	0.4593						1.639	0.7308	0.6911 to 0.7680	0.7285		0.4593
			1.6413	0.2695	0.7308	0.4613						1.641	0.7308	0.6911 to 0.7680	0.7305		0.4613
			1.6452	0.2695	0.729	0.4595						1.645	0.729	0.6892 to 0.7662	0.7305		0.4595
			1.6566	0.2675	0.729	0.4615						1.657	0.729	0.6892 to 0.7662	0.7325		0.4615
			1.6692	0.2655	0.7252	0.4597						1.669	0.7252	0.6853 to 0.7627	0.7345		0.4597
			1.6746	0.2635	0.7252	0.4617						1.675	0.7252	0.6853 to 0.7627	0.7365		0.4617
			1.6776	0.2635	0.7234	0.4599						1.678	0.7234	0.6834 to 0.7609	0.7365		0.4599
			1.681	0.2635	0.7215	0.458						1.681	0.7215	0.6814 to 0.7591	0.7365		0.458
			1.6871	0.2615	0.7196	0.4581						1.687	0.7196	0.6795 to 0.7573	0.7385		0.4581
			1.6911	0.2595	0.7196	0.4601						1.691	0.7196	0.6795 to 0.7573	0.7405		0.4601
			1.6934	0.2595	0.7178	0.4583						1.693	0.7178	0.6776 to 0.7555	0.7405		0.4583
			1.6954	0.2575	0.7178	0.4603						1.695	0.7178	0.6776 to 0.7555	0.7425		0.4603
			1.6994	0.2575	0.7159	0.4584						1.699	0.7159	0.6756 to 0.7538	0.7425		0.4584
			1.7039	0.2555	0.7159	0.4604						1.704	0.7159	0.6756 to 0.7538	0.7445		0.4604
			1.7066	0.2555	0.714	0.4585						1.707	0.714	0.6737 to 0.7520	0.7445		0.4585
			1.7094	0.2535	0.714	0.4605						1.709	0.714	0.6737 to 0.7520	0.7465		0.4605
			1.7124	0.2535	0.7121	0.4586						1.712	0.7121	0.6717 to 0.7502	0.7465		0.4586
			1.7141	0.2515	0.7121	0.4606						1.714	0.7121	0.6717 to 0.7502	0.7485		0.4606
			1.7154	0.2495	0.7084	0.4589						1.715	0.7084	0.6679 to 0.7466	0.7505		0.4589
			1.7165	0.2475	0.7084	0.4609						1.716	0.7084	0.6679 to 0.7466	0.7525		0.4609
			1.718	0.2475	0.7065	0.459						1.718	0.7065	0.6660 to 0.7448	0.7525		0.459
			1.7206	0.2475	0.7047	0.4572						1.721	0.7047	0.6640 to 0.7430	0.7525		0.4572
			1.7226	0.2455	0.7047	0.4592						1.723	0.7047	0.6640 to 0.7430	0.7545		0.4592
			1.7238	0.2435	0.7047	0.4612						1.724	0.7047	0.6640 to 0.7430	0.7565		0.4612
			1.7261	0.2435	0.7028	0.4593						1.726	0.7028	0.6621 to 0.7413	0.7565		0.4593
			1.7299	0.2435	0.7009	0.4574						1.73	0.7009	0.6602 to 0.7395	0.7565		0.4574
			1.7341	0.2415	0.7009	0.4594						1.734	0.7009	0.6602 to 0.7395	0.7585		0.4594
			1.7379	0.2395	0.7009	0.4614						1.738	0.7009	0.6602 to 0.7395	0.7605		0.4614
			1.7414	0.2395	0.6991	0.4596						1.741	0.6991	0.6582 to 0.7377	0.7605		0.4596
			1.7436	0.2375	0.6991	0.4616						1.744	0.6991	0.6582 to 0.7377	0.7625		0.4616
			1.7462	0.2355	0.6991	0.4636						1.746	0.6991	0.6582 to 0.7377	0.7645		0.4636
			1.7497	0.2335	0.6991	0.4656						1.75	0.6991	0.6582 to 0.7377	0.7665		0.4656
			1.7519	0.2315	0.6991	0.4676						1.752	0.6991	0.6582 to 0.7377	0.7685		0.4676
			1.7546	0.2315	0.6972	0.4657						1.755	0.6972	0.6563 to 0.7359	0.7685		0.4657
			1.7563	0.2295	0.6972	0.4677						1.756	0.6972	0.6563 to 0.7359	0.7705		0.4677
			1.7578	0.2295	0.6953	0.4658						1.758	0.6953	0.6544 to 0.7341	0.7705		0.4658
			1.7592	0.2295	0.6935	0.464						1.759	0.6935	0.6525 to 0.7323	0.7705		0.464
			1.7603	0.2275	0.6935	0.466						1.76	0.6935	0.6525 to 0.7323	0.7725		0.466
			1.7617	0.2255	0.6935	0.468						1.762	0.6935	0.6525 to 0.7323	0.7745		0.468
			1.7645	0.2236	0.6935	0.4699						1.765	0.6935	0.6525 to 0.7323	0.7764		0.4699
			1.7669	0.2216	0.6935	0.4719						1.767	0.6935	0.6525 to 0.7323	0.7784		0.4719
			1.7693	0.2196	0.6935	0.4739						1.769	0.6935	0.6525 to 0.7323	0.7804		0.4739
			1.7746	0.2176	0.6935	0.4759						1.775	0.6935	0.6525 to 0.7323	0.7824		0.4759
			1.7785	0.2176	0.6916	0.474						1.778	0.6916	0.6505 to 0.7305	0.7824		0.474
			1.7813	0.2156	0.6916	0.476						1.781	0.6916	0.6505 to 0.7305	0.7844		0.476
			1.7846	0.2156	0.6897	0.4741						1.785	0.6897	0.6486 to 0.7287	0.7844		0.4741
			1.7877	0.2156	0.686	0.4704						1.788	0.686	0.6448 to 0.7251	0.7844		0.4704
			1.7906	0.2156	0.6841	0.4685						1.791	0.6841	0.6428 to 0.7233	0.7844		0.4685
			1.7916	0.2156	0.6822	0.4666						1.792	0.6822	0.6409 to 0.7215	0.7844		0.4666
			1.7919	0.2156	0.6804	0.4648						1.792	0.6804	0.6390 to 0.7197	0.7844		0.4648
			1.7939	0.2156	0.6785	0.4629						1.794	0.6785	0.6371 to 0.7179	0.7844		0.4629
			1.7967	0.2156	0.6766	0.461						1.797	0.6766	0.6352 to 0.7161	0.7844		0.461
			1.8008	0.2156	0.6748	0.4592						1.801	0.6748	0.6333 to 0.7143	0.7844		0.4592
			1.8059	0.2136	0.6748	0.4612						1.806	0.6748	0.6333 to 0.7143	0.7864		0.4612
			1.8083	0.2136	0.6729	0.4593						1.808	0.6729	0.6313 to 0.7125	0.7864		0.4593
			1.8091	0.2116	0.6729	0.4613						1.809	0.6729	0.6313 to 0.7125	0.7884		0.4613
			1.8106	0.2116	0.671	0.4594						1.811	0.671	0.6294 to 0.7107	0.7884		0.4594
			1.8122	0.2116	0.6692	0.4576						1.812	0.6692	0.6275 to 0.7089	0.7884		0.4576
			1.8137	0.2096	0.6692	0.4596						1.814	0.6692	0.6275 to 0.7089	0.7904		0.4596
			1.815	0.2096	0.6673	0.4577						1.815	0.6673	0.6256 to 0.7071	0.7904		0.4577
			1.8183	0.2096	0.6654	0.4558						1.818	0.6654	0.6237 to 0.7053	0.7904		0.4558
			1.8236	0.2076	0.6654	0.4578						1.824	0.6654	0.6237 to 0.7053	0.7924		0.4578
			1.8271	0.2076	0.6636	0.456						1.827	0.6636	0.6218 to 0.7035	0.7924		0.456
			1.8289	0.2076	0.6617	0.4541						1.829	0.6617	0.6198 to 0.7017	0.7924		0.4541
			1.83	0.2056	0.6617	0.4561						1.83	0.6617	0.6198 to 0.7017	0.7944		0.4561
			1.8338	0.2056	0.6598	0.4542						1.834	0.6598	0.6179 to 0.6999	0.7944		0.4542
			1.8379	0.2056	0.6579	0.4523						1.838	0.6579	0.6160 to 0.6981	0.7944		0.4523
			1.8406	0.2036	0.6579	0.4543						1.841	0.6579	0.6160 to 0.6981	0.7964		0.4543
			1.8427	0.2016	0.6579	0.4563						1.843	0.6579	0.6160 to 0.6981	0.7984		0.4563
			1.8439	0.1996	0.6579	0.4583						1.844	0.6579	0.6160 to 0.6981	0.8004		0.4583
			1.8453	0.1996	0.6561	0.4565						1.845	0.6561	0.6141 to 0.6963	0.8004		0.4565
			1.8471	0.1976	0.6561	0.4585						1.847	0.6561	0.6141 to 0.6963	0.8024		0.4585
			1.8506	0.1976	0.6542	0.4566						1.851	0.6542	0.6122 to 0.6945	0.8024		0.4566
			1.8537	0.1976	0.6523	0.4547						1.854	0.6523	0.6103 to 0.6927	0.8024		0.4547
			1.8557	0.1976	0.6505	0.4529						1.856	0.6505	0.6084 to 0.6909	0.8024		0.4529
			1.8581	0.1956	0.6486	0.453						1.858	0.6486	0.6065 to 0.6891	0.8044		0.453
			1.862	0.1936	0.6486	0.455						1.862	0.6486	0.6065 to 0.6891	0.8064		0.455
			1.8677	0.1916	0.6486	0.457						1.868	0.6486	0.6065 to 0.6891	0.8084		0.457
			1.8714	0.1896	0.6486	0.459						1.871	0.6486	0.6065 to 0.6891	0.8104		0.459
			1.873	0.1876	0.6486	0.461						1.873	0.6486	0.6065 to 0.6891	0.8124		0.461
			1.8742	0.1876	0.6467	0.4591						1.874	0.6467	0.6046 to 0.6873	0.8124		0.4591
			1.8757	0.1876	0.6449	0.4573						1.876	0.6449	0.6027 to 0.6854	0.8124		0.4573
			1.8765	0.1876	0.643	0.4554						1.876	0.643	0.6008 to 0.6836	0.8124		0.4554
			1.8767	0.1876	0.6411	0.4535						1.877	0.6411	0.5988 to 0.6818	0.8124		0.4535
			1.8808	0.1856	0.6411	0.4555						1.881	0.6411	0.5988 to 0.6818	0.8144		0.4555
			1.8853	0.1836	0.6411	0.4575						1.885	0.6411	0.5988 to 0.6818	0.8164		0.4575
			1.8863	0.1836	0.6393	0.4557						1.886	0.6393	0.5969 to 0.6800	0.8164		0.4557
			1.8878	0.1836	0.6374	0.4538						1.888	0.6374	0.5950 to 0.6782	0.8164		0.4538
			1.8923	0.1816	0.6355	0.4539						1.892	0.6355	0.5931 to 0.6764	0.8184		0.4539
			1.8971	0.1816	0.6336	0.452						1.897	0.6336	0.5912 to 0.6746	0.8184		0.452
			1.8986	0.1816	0.6318	0.4502						1.899	0.6318	0.5893 to 0.6728	0.8184		0.4502
			1.8992	0.1796	0.6318	0.4522						1.899	0.6318	0.5893 to 0.6728	0.8204		0.4522
			1.9028	0.1796	0.6299	0.4503						1.903	0.6299	0.5874 to 0.6709	0.8204		0.4503
			1.9075	0.1776	0.6299	0.4523						1.907	0.6299	0.5874 to 0.6709	0.8224		0.4523
			1.91	0.1756	0.6299	0.4543						1.91	0.6299	0.5874 to 0.6709	0.8244		0.4543
			1.9113	0.1756	0.628	0.4524						1.911	0.628	0.5855 to 0.6691	0.8244		0.4524
			1.9132	0.1737	0.628	0.4543						1.913	0.628	0.5855 to 0.6691	0.8263		0.4543
			1.9148	0.1737	0.6262	0.4525						1.915	0.6262	0.5836 to 0.6673	0.8263		0.4525
			1.9174	0.1737	0.6243	0.4506						1.917	0.6243	0.5817 to 0.6655	0.8263		0.4506
			1.925	0.1717	0.6243	0.4526						1.925	0.6243	0.5817 to 0.6655	0.8283		0.4526
			1.9312	0.1697	0.6243	0.4546						1.931	0.6243	0.5817 to 0.6655	0.8303		0.4546
			1.9355	0.1697	0.6224	0.4527						1.936	0.6224	0.5798 to 0.6637	0.8303		0.4527
			1.939	0.1697	0.6206	0.4509						1.939	0.6206	0.5779 to 0.6618	0.8303		0.4509
			1.9419	0.1677	0.6206	0.4529						1.942	0.6206	0.5779 to 0.6618	0.8323		0.4529
			1.9471	0.1657	0.6206	0.4549						1.947	0.6206	0.5779 to 0.6618	0.8343		0.4549
			1.9499	0.1637	0.6206	0.4569						1.95	0.6206	0.5779 to 0.6618	0.8363		0.4569
			1.9506	0.1637	0.6187	0.455						1.951	0.6187	0.5760 to 0.6600	0.8363		0.455
			1.9517	0.1617	0.6187	0.457						1.952	0.6187	0.5760 to 0.6600	0.8383		0.457
			1.9523	0.1617	0.6168	0.4551						1.952	0.6168	0.5741 to 0.6582	0.8383		0.4551
			1.9566	0.1617	0.615	0.4533						1.957	0.615	0.5722 to 0.6564	0.8383		0.4533
			1.9625	0.1617	0.6131	0.4514						1.963	0.6131	0.5703 to 0.6546	0.8383		0.4514
			1.9647	0.1597	0.6131	0.4534						1.965	0.6131	0.5703 to 0.6546	0.8403		0.4534
			1.9663	0.1597	0.6112	0.4515						1.966	0.6112	0.5685 to 0.6527	0.8403		0.4515
			1.9728	0.1597	0.6093	0.4496						1.973	0.6093	0.5666 to 0.6509	0.8403		0.4496
			1.9797	0.1597	0.6075	0.4478						1.98	0.6075	0.5647 to 0.6491	0.8403		0.4478
			1.982	0.1597	0.6056	0.4459						1.982	0.6056	0.5628 to 0.6473	0.8403		0.4459
			1.9857	0.1577	0.6056	0.4479						1.986	0.6056	0.5628 to 0.6473	0.8423		0.4479
			1.9922	0.1577	0.6037	0.446						1.992	0.6037	0.5609 to 0.6454	0.8423		0.446
			1.9962	0.1557	0.6037	0.448						1.996	0.6037	0.5609 to 0.6454	0.8443		0.448
			1.9971	0.1557	0.6019	0.4462						1.997	0.6019	0.5590 to 0.6436	0.8443		0.4462
			1.9988	0.1537	0.6019	0.4482						1.999	0.6019	0.5590 to 0.6436	0.8463		0.4482
			2.0019	0.1497	0.6019	0.4522						2.002	0.6019	0.5590 to 0.6436	0.8503		0.4522
			2.006	0.1497	0.6	0.4503						2.006	0.6	0.5571 to 0.6418	0.8503		0.4503
			2.0103	0.1497	0.5981	0.4484						2.01	0.5981	0.5552 to 0.6400	0.8503		0.4484
			2.0167	0.1497	0.5963	0.4466						2.017	0.5963	0.5533 to 0.6381	0.8503		0.4466
			2.0219	0.1497	0.5944	0.4447						2.022	0.5944	0.5514 to 0.6363	0.8503		0.4447
			2.0231	0.1497	0.5925	0.4428						2.023	0.5925	0.5495 to 0.6345	0.8503		0.4428
			2.028	0.1477	0.5925	0.4448						2.028	0.5925	0.5495 to 0.6345	0.8523		0.4448
			2.0336	0.1477	0.5907	0.443						2.034	0.5907	0.5476 to 0.6327	0.8523		0.443
			2.0353	0.1477	0.5888	0.4411						2.035	0.5888	0.5458 to 0.6308	0.8523		0.4411
			2.0393	0.1477	0.5869	0.4392						2.039	0.5869	0.5439 to 0.6290	0.8523		0.4392
			2.0432	0.1477	0.585	0.4373						2.043	0.585	0.5420 to 0.6272	0.8523		0.4373
			2.0441	0.1477	0.5832	0.4355						2.044	0.5832	0.5401 to 0.6253	0.8523		0.4355
			2.045	0.1477	0.5813	0.4336						2.045	0.5813	0.5382 to 0.6235	0.8523		0.4336
			2.053	0.1457	0.5813	0.4356						2.053	0.5813	0.5382 to 0.6235	0.8543		0.4356
			2.0638	0.1457	0.5794	0.4337						2.064	0.5794	0.5363 to 0.6217	0.8543		0.4337
			2.0676	0.1437	0.5794	0.4357						2.068	0.5794	0.5363 to 0.6217	0.8563		0.4357
			2.0711	0.1437	0.5776	0.4339						2.071	0.5776	0.5344 to 0.6198	0.8563		0.4339
			2.0753	0.1437	0.5757	0.432						2.075	0.5757	0.5326 to 0.6180	0.8563		0.432
			2.0777	0.1417	0.5757	0.434						2.078	0.5757	0.5326 to 0.6180	0.8583		0.434
			2.0806	0.1417	0.5738	0.4321						2.081	0.5738	0.5307 to 0.6162	0.8583		0.4321
			2.0846	0.1417	0.572	0.4303						2.085	0.572	0.5288 to 0.6143	0.8583		0.4303
			2.0886	0.1417	0.5701	0.4284						2.089	0.5701	0.5269 to 0.6125	0.8583		0.4284
			2.0935	0.1417	0.5682	0.4265						2.094	0.5682	0.5250 to 0.6107	0.8583		0.4265
			2.0985	0.1417	0.5664	0.4247						2.098	0.5664	0.5232 to 0.6088	0.8583		0.4247
			2.1012	0.1397	0.5664	0.4267						2.101	0.5664	0.5232 to 0.6088	0.8603		0.4267
			2.1035	0.1397	0.5645	0.4248						2.103	0.5645	0.5213 to 0.6070	0.8603		0.4248
			2.1087	0.1397	0.5626	0.4229						2.109	0.5626	0.5194 to 0.6051	0.8603		0.4229
			2.113	0.1397	0.5607	0.421						2.113	0.5607	0.5175 to 0.6033	0.8603		0.421
			2.1147	0.1397	0.5589	0.4192						2.115	0.5589	0.5156 to 0.6015	0.8603		0.4192
			2.1155	0.1377	0.5589	0.4212						2.115	0.5589	0.5156 to 0.6015	0.8623		0.4212
			2.117	0.1377	0.557	0.4193						2.117	0.557	0.5138 to 0.5996	0.8623		0.4193
			2.1217	0.1357	0.557	0.4213						2.122	0.557	0.5138 to 0.5996	0.8643		0.4213
			2.1263	0.1357	0.5551	0.4194						2.126	0.5551	0.5119 to 0.5978	0.8643		0.4194
			2.1314	0.1357	0.5514	0.4157						2.131	0.5514	0.5081 to 0.5941	0.8643		0.4157
			2.139	0.1357	0.5495	0.4138						2.139	0.5495	0.5063 to 0.5923	0.8643		0.4138
			2.1438	0.1337	0.5477	0.414						2.144	0.5477	0.5044 to 0.5904	0.8663		0.414
			2.1455	0.1317	0.5477	0.416						2.145	0.5477	0.5044 to 0.5904	0.8683		0.416
			2.1476	0.1317	0.5458	0.4141						2.148	0.5458	0.5025 to 0.5886	0.8683		0.4141
			2.1494	0.1317	0.5439	0.4122						2.149	0.5439	0.5006 to 0.5867	0.8683		0.4122
			2.1501	0.1297	0.5439	0.4142						2.15	0.5439	0.5006 to 0.5867	0.8703		0.4142
			2.1523	0.1277	0.5439	0.4162						2.152	0.5439	0.5006 to 0.5867	0.8723		0.4162
			2.1555	0.1277	0.5402	0.4125						2.155	0.5402	0.4969 to 0.5830	0.8723		0.4125
			2.1572	0.1257	0.5402	0.4145						2.157	0.5402	0.4969 to 0.5830	0.8743		0.4145
			2.1603	0.1257	0.5383	0.4126						2.16	0.5383	0.4950 to 0.5812	0.8743		0.4126
			2.1684	0.1257	0.5364	0.4107						2.168	0.5364	0.4932 to 0.5793	0.8743		0.4107
			2.1757	0.1238	0.5364	0.4126						2.176	0.5364	0.4932 to 0.5793	0.8762		0.4126
			2.1782	0.1238	0.5346	0.4108						2.178	0.5346	0.4913 to 0.5775	0.8762		0.4108
			2.1822	0.1238	0.5327	0.4089						2.182	0.5327	0.4894 to 0.5756	0.8762		0.4089
			2.1866	0.1238	0.5308	0.407						2.187	0.5308	0.4875 to 0.5738	0.8762		0.407
			2.1898	0.1218	0.5308	0.409						2.19	0.5308	0.4875 to 0.5738	0.8782		0.409
			2.1934	0.1218	0.529	0.4072						2.193	0.529	0.4857 to 0.5719	0.8782		0.4072
			2.1978	0.1218	0.5271	0.4053						2.198	0.5271	0.4838 to 0.5701	0.8782		0.4053
			2.2033	0.1218	0.5252	0.4034						2.203	0.5252	0.4819 to 0.5682	0.8782		0.4034
			2.2076	0.1218	0.5234	0.4016						2.208	0.5234	0.4801 to 0.5664	0.8782		0.4016
			2.2143	0.1218	0.5215	0.3997						2.214	0.5215	0.4782 to 0.5645	0.8782		0.3997
			2.2208	0.1218	0.5196	0.3978						2.221	0.5196	0.4763 to 0.5627	0.8782		0.3978
			2.2248	0.1178	0.5196	0.4018						2.225	0.5196	0.4763 to 0.5627	0.8822		0.4018
			2.2275	0.1178	0.5178	0.4						2.228	0.5178	0.4745 to 0.5608	0.8822		0.4
			2.2289	0.1158	0.5178	0.402						2.229	0.5178	0.4745 to 0.5608	0.8842		0.402
			2.2323	0.1158	0.5159	0.4001						2.232	0.5159	0.4726 to 0.5590	0.8842		0.4001
			2.235	0.1158	0.514	0.3982						2.235	0.514	0.4708 to 0.5571	0.8842		0.3982
			2.2362	0.1138	0.514	0.4002						2.236	0.514	0.4708 to 0.5571	0.8862		0.4002
			2.2372	0.1118	0.514	0.4022						2.237	0.514	0.4708 to 0.5571	0.8882		0.4022
			2.2383	0.1098	0.514	0.4042						2.238	0.514	0.4708 to 0.5571	0.8902		0.4042
			2.2394	0.1098	0.5121	0.4023						2.239	0.5121	0.4689 to 0.5553	0.8902		0.4023
			2.2453	0.1098	0.5103	0.4005						2.245	0.5103	0.4670 to 0.5534	0.8902		0.4005
			2.2524	0.1078	0.5103	0.4025						2.252	0.5103	0.4670 to 0.5534	0.8922		0.4025
			2.2578	0.1058	0.5103	0.4045						2.258	0.5103	0.4670 to 0.5534	0.8942		0.4045
			2.2631	0.1038	0.5103	0.4065						2.263	0.5103	0.4670 to 0.5534	0.8962		0.4065
			2.2647	0.1018	0.5103	0.4085						2.265	0.5103	0.4670 to 0.5534	0.8982		0.4085
			2.269	0.1018	0.5084	0.4066						2.269	0.5084	0.4652 to 0.5516	0.8982		0.4066
			2.2746	0.0998	0.5084	0.4086						2.275	0.5084	0.4652 to 0.5516	0.9002		0.4086
			2.2793	0.0998	0.5065	0.4067						2.279	0.5065	0.4633 to 0.5497	0.9002		0.4067
			2.2848	0.0998	0.5047	0.4049						2.285	0.5047	0.4614 to 0.5478	0.9002		0.4049
			2.29	0.0998	0.5028	0.403						2.29	0.5028	0.4596 to 0.5460	0.9002		0.403
			2.2957	0.0978	0.5028	0.405						2.296	0.5028	0.4596 to 0.5460	0.9022		0.405
			2.2995	0.0978	0.4991	0.4013						2.3	0.4991	0.4559 to 0.5423	0.9022		0.4013
			2.3018	0.0958	0.4991	0.4033						2.302	0.4991	0.4559 to 0.5423	0.9042		0.4033
			2.3046	0.0958	0.4972	0.4014						2.305	0.4972	0.4540 to 0.5404	0.9042		0.4014
			2.3063	0.0938	0.4972	0.4034						2.306	0.4972	0.4540 to 0.5404	0.9062		0.4034
			2.3072	0.0938	0.4953	0.4015						2.307	0.4953	0.4522 to 0.5386	0.9062		0.4015
			2.3083	0.0938	0.4935	0.3997						2.308	0.4935	0.4503 to 0.5367	0.9062		0.3997
			2.3097	0.0918	0.4935	0.4017						2.31	0.4935	0.4503 to 0.5367	0.9082		0.4017
			2.3136	0.0918	0.4916	0.3998						2.314	0.4916	0.4484 to 0.5348	0.9082		0.3998
			2.3176	0.0918	0.4897	0.3979						2.318	0.4897	0.4466 to 0.5330	0.9082		0.3979
			2.3215	0.0918	0.4879	0.3961						2.321	0.4879	0.4447 to 0.5311	0.9082		0.3961
			2.3245	0.0898	0.4879	0.3981						2.325	0.4879	0.4447 to 0.5311	0.9102		0.3981
			2.3319	0.0898	0.486	0.3962						2.332	0.486	0.4429 to 0.5292	0.9102		0.3962
			2.3401	0.0898	0.4841	0.3943						2.34	0.4841	0.4410 to 0.5274	0.9102		0.3943
			2.3445	0.0898	0.4822	0.3924						2.344	0.4822	0.4392 to 0.5255	0.9102		0.3924
			2.349	0.0898	0.4804	0.3906						2.349	0.4804	0.4373 to 0.5237	0.9102		0.3906
			2.3569	0.0878	0.4804	0.3926						2.357	0.4804	0.4373 to 0.5237	0.9122		0.3926
			2.3655	0.0878	0.4785	0.3907						2.366	0.4785	0.4355 to 0.5218	0.9122		0.3907
			2.3677	0.0878	0.4766	0.3888						2.368	0.4766	0.4336 to 0.5199	0.9122		0.3888
			2.3695	0.0878	0.4748	0.387						2.37	0.4748	0.4318 to 0.5181	0.9122		0.387
			2.3716	0.0878	0.4729	0.3851						2.372	0.4729	0.4299 to 0.5162	0.9122		0.3851
			2.3805	0.0878	0.471	0.3832						2.38	0.471	0.4281 to 0.5143	0.9122		0.3832
			2.3912	0.0878	0.4692	0.3814						2.391	0.4692	0.4262 to 0.5125	0.9122		0.3814
			2.3943	0.0878	0.4673	0.3795						2.394	0.4673	0.4244 to 0.5106	0.9122		0.3795
			2.4091	0.0878	0.4654	0.3776						2.409	0.4654	0.4225 to 0.5087	0.9122		0.3776
			2.4278	0.0858	0.4654	0.3796						2.428	0.4654	0.4225 to 0.5087	0.9142		0.3796
			2.4335	0.0858	0.4636	0.3778						2.433	0.4636	0.4207 to 0.5068	0.9142		0.3778
			2.4346	0.0858	0.4617	0.3759						2.435	0.4617	0.4188 to 0.5050	0.9142		0.3759
			2.4353	0.0838	0.4617	0.3779						2.435	0.4617	0.4188 to 0.5050	0.9162		0.3779
			2.4387	0.0838	0.4598	0.376						2.439	0.4598	0.4170 to 0.5031	0.9162		0.376
			2.4438	0.0818	0.4598	0.378						2.444	0.4598	0.4170 to 0.5031	0.9182		0.378
			2.455	0.0818	0.4579	0.3761						2.455	0.4579	0.4151 to 0.5012	0.9182		0.3761
			2.4646	0.0798	0.4579	0.3781						2.465	0.4579	0.4151 to 0.5012	0.9202		0.3781
			2.4673	0.0798	0.4561	0.3763						2.467	0.4561	0.4133 to 0.4994	0.9202		0.3763
			2.4708	0.0798	0.4542	0.3744						2.471	0.4542	0.4114 to 0.4975	0.9202		0.3744
			2.4741	0.0798	0.4523	0.3725						2.474	0.4523	0.4096 to 0.4956	0.9202		0.3725
			2.4837	0.0798	0.4505	0.3707						2.484	0.4505	0.4077 to 0.4937	0.9202		0.3707
			2.4935	0.0798	0.4486	0.3688						2.493	0.4486	0.4059 to 0.4919	0.9202		0.3688
			2.4976	0.0798	0.4467	0.3669						2.498	0.4467	0.4041 to 0.4900	0.9202		0.3669
			2.5016	0.0798	0.443	0.3632						2.502	0.443	0.4004 to 0.4862	0.9202		0.3632
			2.5046	0.0798	0.4411	0.3613						2.505	0.4411	0.3985 to 0.4844	0.9202		0.3613
			2.5111	0.0798	0.4393	0.3595						2.511	0.4393	0.3967 to 0.4825	0.9202		0.3595
			2.5213	0.0798	0.4374	0.3576						2.521	0.4374	0.3949 to 0.4806	0.9202		0.3576
			2.531	0.0798	0.4355	0.3557						2.531	0.4355	0.3930 to 0.4787	0.9202		0.3557
			2.5371	0.0798	0.4336	0.3538						2.537	0.4336	0.3912 to 0.4768	0.9202		0.3538
			2.5387	0.0778	0.4336	0.3558						2.539	0.4336	0.3912 to 0.4768	0.9222		0.3558
			2.5433	0.0778	0.4318	0.354						2.543	0.4318	0.3893 to 0.4750	0.9222		0.354
			2.5497	0.0758	0.4318	0.356						2.55	0.4318	0.3893 to 0.4750	0.9242		0.356
			2.5522	0.0739	0.4318	0.3579						2.552	0.4318	0.3893 to 0.4750	0.9261		0.3579
			2.5541	0.0739	0.4299	0.356						2.554	0.4299	0.3875 to 0.4731	0.9261		0.356
			2.5557	0.0719	0.4299	0.358						2.556	0.4299	0.3875 to 0.4731	0.9281		0.358
			2.5579	0.0719	0.428	0.3561						2.558	0.428	0.3857 to 0.4712	0.9281		0.3561
			2.5639	0.0719	0.4262	0.3543						2.564	0.4262	0.3838 to 0.4693	0.9281		0.3543
			2.5689	0.0699	0.4262	0.3563						2.569	0.4262	0.3838 to 0.4693	0.9301		0.3563
			2.5728	0.0699	0.4243	0.3544						2.573	0.4243	0.3820 to 0.4674	0.9301		0.3544
			2.5799	0.0679	0.4243	0.3564						2.58	0.4243	0.3820 to 0.4674	0.9321		0.3564
			2.5852	0.0659	0.4243	0.3584						2.585	0.4243	0.3820 to 0.4674	0.9341		0.3584
			2.5951	0.0639	0.4224	0.3585						2.595	0.4224	0.3802 to 0.4656	0.9361		0.3585
			2.6055	0.0639	0.4206	0.3567						2.606	0.4206	0.3783 to 0.4637	0.9361		0.3567
			2.6107	0.0639	0.4187	0.3548						2.611	0.4187	0.3765 to 0.4618	0.9361		0.3548
			2.6172	0.0639	0.4168	0.3529						2.617	0.4168	0.3747 to 0.4599	0.9361		0.3529
			2.6202	0.0639	0.415	0.3511						2.62	0.415	0.3728 to 0.4580	0.9361		0.3511
			2.6209	0.0639	0.4131	0.3492						2.621	0.4131	0.3710 to 0.4561	0.9361		0.3492
			2.6232	0.0639	0.4112	0.3473						2.623	0.4112	0.3692 to 0.4542	0.9361		0.3473
			2.6262	0.0619	0.4093	0.3474						2.626	0.4093	0.3673 to 0.4524	0.9381		0.3474
			2.6285	0.0619	0.4075	0.3456						2.629	0.4075	0.3655 to 0.4505	0.9381		0.3456
			2.6306	0.0619	0.4056	0.3437						2.631	0.4056	0.3637 to 0.4486	0.9381		0.3437
			2.6356	0.0619	0.4037	0.3418						2.636	0.4037	0.3619 to 0.4467	0.9381		0.3418
			2.6435	0.0599	0.4037	0.3438						2.643	0.4037	0.3619 to 0.4467	0.9401		0.3438
			2.6506	0.0599	0.4019	0.342						2.651	0.4019	0.3600 to 0.4448	0.9401		0.342
			2.6544	0.0579	0.4019	0.344						2.654	0.4019	0.3600 to 0.4448	0.9421		0.344
			2.6559	0.0579	0.4	0.3421						2.656	0.4	0.3582 to 0.4429	0.9421		0.3421
			2.6618	0.0579	0.3981	0.3402						2.662	0.3981	0.3564 to 0.4410	0.9421		0.3402
			2.6679	0.0579	0.3963	0.3384						2.668	0.3963	0.3546 to 0.4391	0.9421		0.3384
			2.6723	0.0579	0.3944	0.3365						2.672	0.3944	0.3527 to 0.4372	0.9421		0.3365
			2.6836	0.0579	0.3925	0.3346						2.684	0.3925	0.3509 to 0.4353	0.9421		0.3346
			2.692	0.0579	0.3907	0.3328						2.692	0.3907	0.3491 to 0.4334	0.9421		0.3328
			2.6989	0.0579	0.3888	0.3309						2.699	0.3888	0.3473 to 0.4315	0.9421		0.3309
			2.7064	0.0579	0.3869	0.329						2.706	0.3869	0.3454 to 0.4297	0.9421		0.329
			2.7113	0.0579	0.385	0.3271						2.711	0.385	0.3436 to 0.4278	0.9421		0.3271
			2.7226	0.0559	0.385	0.3291						2.723	0.385	0.3436 to 0.4278	0.9441		0.3291
			2.7386	0.0559	0.3832	0.3273						2.739	0.3832	0.3418 to 0.4259	0.9441		0.3273
			2.7529	0.0559	0.3813	0.3254						2.753	0.3813	0.3400 to 0.4240	0.9441		0.3254
			2.7589	0.0559	0.3776	0.3217						2.759	0.3776	0.3363 to 0.4202	0.9441		0.3217
			2.7617	0.0539	0.3776	0.3237						2.762	0.3776	0.3363 to 0.4202	0.9461		0.3237
			2.7671	0.0519	0.3776	0.3257						2.767	0.3776	0.3363 to 0.4202	0.9481		0.3257
			2.7714	0.0519	0.3757	0.3238						2.771	0.3757	0.3345 to 0.4183	0.9481		0.3238
			2.7769	0.0519	0.3738	0.3219						2.777	0.3738	0.3327 to 0.4164	0.9481		0.3219
			2.7814	0.0519	0.372	0.3201						2.781	0.372	0.3309 to 0.4145	0.9481		0.3201
			2.7819	0.0519	0.3682	0.3163						2.782	0.3682	0.3272 to 0.4107	0.9481		0.3163
			2.7865	0.0519	0.3664	0.3145						2.786	0.3664	0.3254 to 0.4088	0.9481		0.3145
			2.7937	0.0519	0.3645	0.3126						2.794	0.3645	0.3236 to 0.4069	0.9481		0.3126
			2.7983	0.0519	0.3626	0.3107						2.798	0.3626	0.3218 to 0.4050	0.9481		0.3107
			2.8043	0.0499	0.3626	0.3127						2.804	0.3626	0.3218 to 0.4050	0.9501		0.3127
			2.8092	0.0499	0.3607	0.3108						2.809	0.3607	0.3200 to 0.4031	0.9501		0.3108
			2.8156	0.0499	0.3589	0.309						2.816	0.3589	0.3182 to 0.4012	0.9501		0.309
			2.8227	0.0499	0.357	0.3071						2.823	0.357	0.3164 to 0.3992	0.9501		0.3071
			2.8267	0.0499	0.3551	0.3052						2.827	0.3551	0.3146 to 0.3973	0.9501		0.3052
			2.8318	0.0499	0.3533	0.3034						2.832	0.3533	0.3127 to 0.3954	0.9501		0.3034
			2.8361	0.0479	0.3533	0.3054						2.836	0.3533	0.3127 to 0.3954	0.9521		0.3054
			2.8395	0.0479	0.3514	0.3035						2.839	0.3514	0.3109 to 0.3935	0.9521		0.3035
			2.8414	0.0459	0.3514	0.3055						2.841	0.3514	0.3109 to 0.3935	0.9541		0.3055
			2.842	0.0459	0.3495	0.3036						2.842	0.3495	0.3091 to 0.3916	0.9541		0.3036
			2.8469	0.0459	0.3477	0.3018						2.847	0.3477	0.3073 to 0.3897	0.9541		0.3018
			2.8524	0.0459	0.3458	0.2999						2.852	0.3458	0.3055 to 0.3878	0.9541		0.2999
			2.8544	0.0439	0.3458	0.3019						2.854	0.3458	0.3055 to 0.3878	0.9561		0.3019
			2.8579	0.0439	0.3439	0.3						2.858	0.3439	0.3037 to 0.3859	0.9561		0.3
			2.8614	0.0419	0.3439	0.302						2.861	0.3439	0.3037 to 0.3859	0.9581		0.302
			2.8685	0.0399	0.3439	0.304						2.869	0.3439	0.3037 to 0.3859	0.9601		0.304
			2.8831	0.0399	0.3421	0.3022						2.883	0.3421	0.3019 to 0.3840	0.9601		0.3022
			2.8964	0.0379	0.3421	0.3042						2.896	0.3421	0.3019 to 0.3840	0.9621		0.3042
			2.9045	0.0379	0.3402	0.3023						2.904	0.3402	0.3001 to 0.3821	0.9621		0.3023
			2.9122	0.0379	0.3383	0.3004						2.912	0.3383	0.2983 to 0.3802	0.9621		0.3004
			2.9199	0.0379	0.3346	0.2967						2.92	0.3346	0.2947 to 0.3763	0.9621		0.2967
			2.9296	0.0379	0.3327	0.2948						2.93	0.3327	0.2929 to 0.3744	0.9621		0.2948
			2.9387	0.0379	0.3308	0.2929						2.939	0.3308	0.2911 to 0.3725	0.9621		0.2929
			2.9539	0.0379	0.329	0.2911						2.954	0.329	0.2893 to 0.3706	0.9621		0.2911
			2.9702	0.0379	0.3271	0.2892						2.97	0.3271	0.2875 to 0.3687	0.9621		0.2892
			2.9838	0.0379	0.3252	0.2873						2.984	0.3252	0.2857 to 0.3667	0.9621		0.2873
			2.9997	0.0379	0.3234	0.2855						3	0.3234	0.2839 to 0.3648	0.9621		0.2855
			3.0065	0.0379	0.3215	0.2836						3.006	0.3215	0.2821 to 0.3629	0.9621		0.2836
			3.0129	0.0379	0.3196	0.2817						3.013	0.3196	0.2803 to 0.3610	0.9621		0.2817
			3.0195	0.0359	0.3196	0.2837						3.02	0.3196	0.2803 to 0.3610	0.9641		0.2837
			3.0276	0.0339	0.3178	0.2839						3.028	0.3178	0.2785 to 0.3591	0.9661		0.2839
			3.0347	0.0319	0.3178	0.2859						3.035	0.3178	0.2785 to 0.3591	0.9681		0.2859
			3.0377	0.0319	0.3159	0.284						3.038	0.3159	0.2767 to 0.3572	0.9681		0.284
			3.0431	0.0319	0.314	0.2821						3.043	0.314	0.2749 to 0.3552	0.9681		0.2821
			3.0551	0.0299	0.314	0.2841						3.055	0.314	0.2749 to 0.3552	0.9701		0.2841
			3.084	0.0299	0.3121	0.2822						3.084	0.3121	0.2731 to 0.3533	0.9701		0.2822
			3.1078	0.0299	0.3103	0.2804						3.108	0.3103	0.2713 to 0.3514	0.9701		0.2804
			3.1186	0.0299	0.3084	0.2785						3.119	0.3084	0.2695 to 0.3495	0.9701		0.2785
			3.1311	0.0279	0.3047	0.2768						3.131	0.3047	0.2659 to 0.3456	0.9721		0.2768
			3.1427	0.0279	0.3028	0.2749						3.143	0.3028	0.2641 to 0.3437	0.9721		0.2749
			3.1547	0.0279	0.3009	0.273						3.155	0.3009	0.2623 to 0.3418	0.9721		0.273
			3.1667	0.0279	0.2972	0.2693						3.167	0.2972	0.2587 to 0.3379	0.9721		0.2693
			3.1753	0.0279	0.2953	0.2674						3.175	0.2953	0.2570 to 0.3360	0.9721		0.2674
			3.1816	0.0259	0.2953	0.2694						3.182	0.2953	0.2570 to 0.3360	0.9741		0.2694
			3.1861	0.024	0.2953	0.2713						3.186	0.2953	0.2570 to 0.3360	0.976		0.2713
			3.1898	0.022	0.2953	0.2733						3.19	0.2953	0.2570 to 0.3360	0.978		0.2733
			3.1928	0.022	0.2935	0.2715						3.193	0.2935	0.2552 to 0.3340	0.978		0.2715
			3.2097	0.022	0.2916	0.2696						3.21	0.2916	0.2534 to 0.3321	0.978		0.2696
			3.2283	0.022	0.2879	0.2659						3.228	0.2879	0.2498 to 0.3283	0.978		0.2659
			3.2317	0.022	0.286	0.264						3.232	0.286	0.2480 to 0.3263	0.978		0.264
			3.2347	0.022	0.2841	0.2621						3.235	0.2841	0.2462 to 0.3244	0.978		0.2621
			3.2384	0.022	0.2822	0.2602						3.238	0.2822	0.2445 to 0.3224	0.978		0.2602
			3.2431	0.022	0.2804	0.2584						3.243	0.2804	0.2427 to 0.3205	0.978		0.2584
			3.2481	0.022	0.2785	0.2565						3.248	0.2785	0.2409 to 0.3186	0.978		0.2565
			3.2522	0.02	0.2766	0.2566						3.252	0.2766	0.2391 to 0.3166	0.98		0.2566
			3.257	0.02	0.2748	0.2548						3.257	0.2748	0.2373 to 0.3147	0.98		0.2548
			3.2622	0.018	0.2748	0.2568						3.262	0.2748	0.2373 to 0.3147	0.982		0.2568
			3.265	0.016	0.2748	0.2588						3.265	0.2748	0.2373 to 0.3147	0.984		0.2588
			3.2715	0.016	0.2729	0.2569						3.272	0.2729	0.2356 to 0.3128	0.984		0.2569
			3.281	0.016	0.271	0.255						3.281	0.271	0.2338 to 0.3108	0.984		0.255
			3.2845	0.016	0.2692	0.2532						3.284	0.2692	0.2320 to 0.3089	0.984		0.2532
			3.2852	0.016	0.2673	0.2513						3.285	0.2673	0.2302 to 0.3069	0.984		0.2513
			3.2888	0.014	0.2654	0.2514						3.289	0.2654	0.2285 to 0.3050	0.986		0.2514
			3.3043	0.012	0.2654	0.2534						3.304	0.2654	0.2285 to 0.3050	0.988		0.2534
			3.3283	0.012	0.2636	0.2516						3.328	0.2636	0.2267 to 0.3031	0.988		0.2516
			3.3547	0.012	0.2617	0.2497						3.355	0.2617	0.2249 to 0.3011	0.988		0.2497
			3.3746	0.012	0.2598	0.2478						3.375	0.2598	0.2231 to 0.2992	0.988		0.2478
			3.3905	0.012	0.2579	0.2459						3.391	0.2579	0.2214 to 0.2972	0.988		0.2459
			3.4034	0.012	0.2561	0.2441						3.403	0.2561	0.2196 to 0.2953	0.988		0.2441
			3.407	0.012	0.2542	0.2422						3.407	0.2542	0.2178 to 0.2933	0.988		0.2422
			3.4122	0.012	0.2523	0.2403						3.412	0.2523	0.2161 to 0.2914	0.988		0.2403
			3.4222	0.01	0.2523	0.2423						3.422	0.2523	0.2161 to 0.2914	0.99		0.2423
			3.4347	0.01	0.2505	0.2405						3.435	0.2505	0.2143 to 0.2894	0.99		0.2405
			3.4446	0.01	0.2486	0.2386						3.445	0.2486	0.2125 to 0.2875	0.99		0.2386
			3.4549	0.01	0.2467	0.2367						3.455	0.2467	0.2107 to 0.2855	0.99		0.2367
			3.4841	0.01	0.243	0.233						3.484	0.243	0.2072 to 0.2816	0.99		0.233
			3.5105	0.01	0.2411	0.2311						3.51	0.2411	0.2055 to 0.2797	0.99		0.2311
			3.5169	0.01	0.2393	0.2293						3.517	0.2393	0.2037 to 0.2777	0.99		0.2293
			3.5244	0.01	0.2374	0.2274						3.524	0.2374	0.2019 to 0.2758	0.99		0.2274
			3.5421	0.01	0.2355	0.2255						3.542	0.2355	0.2002 to 0.2738	0.99		0.2255
			3.561	0.01	0.2336	0.2236						3.561	0.2336	0.1984 to 0.2719	0.99		0.2236
			3.5674	0.007984	0.2336	0.225616						3.567	0.2336	0.1984 to 0.2719	0.992		0.2256
			3.5733	0.007984	0.2318	0.223816						3.573	0.2318	0.1967 to 0.2699	0.992		0.2238
			3.5843	0.007984	0.2299	0.221916						3.584	0.2299	0.1949 to 0.2679	0.992		0.2219
			3.6074	0.005988	0.2299	0.223912						3.607	0.2299	0.1949 to 0.2679	0.994		0.2239
			3.6367	0.003992	0.2299	0.225908						3.637	0.2299	0.1949 to 0.2679	0.996		0.2259
			3.672	0.003992	0.228	0.224008						3.672	0.228	0.1931 to 0.2660	0.996		0.224
			3.7015	0.003992	0.2262	0.222208						3.701	0.2262	0.1914 to 0.2640	0.996		0.2222
			3.7085	0.003992	0.2243	0.220308						3.708	0.2243	0.1896 to 0.2621	0.996		0.2203
			3.7416	0.003992	0.2224	0.218408						3.742	0.2224	0.1879 to 0.2601	0.996		0.2184
			3.7761	0.003992	0.2206	0.216608						3.776	0.2206	0.1861 to 0.2581	0.996		0.2166
			3.7821	0.003992	0.2187	0.214708						3.782	0.2187	0.1844 to 0.2562	0.996		0.2147
			3.7915	0.003992	0.2168	0.212808						3.791	0.2168	0.1826 to 0.2542	0.996		0.2128
			3.7997	0.003992	0.215	0.211008						3.8	0.215	0.1809 to 0.2522	0.996		0.211
			3.8032	0.003992	0.2131	0.209108						3.803	0.2131	0.1791 to 0.2503	0.996		0.2091
			3.8069	0.003992	0.2112	0.207208						3.807	0.2112	0.1774 to 0.2483	0.996		0.2072
			3.8122	0.003992	0.2093	0.205308						3.812	0.2093	0.1756 to 0.2463	0.996		0.2053
			3.8216	0.003992	0.2075	0.203508						3.822	0.2075	0.1739 to 0.2443	0.996		0.2035
			3.8285	0.003992	0.2056	0.201608						3.828	0.2056	0.1721 to 0.2424	0.996		0.2016
			3.8307	0.003992	0.2037	0.199708						3.831	0.2037	0.1704 to 0.2404	0.996		0.1997
			3.8394	0.003992	0.2019	0.197908						3.839	0.2019	0.1686 to 0.2384	0.996		0.1979
			3.8544	0.003992	0.1981	0.194108						3.854	0.1981	0.1652 to 0.2345	0.996		0.1941
			3.8693	0.003992	0.1963	0.192308						3.869	0.1963	0.1634 to 0.2325	0.996		0.1923
			3.8845	0.003992	0.1944	0.190408						3.884	0.1944	0.1617 to 0.2305	0.996		0.1904
			3.903	0.003992	0.1925	0.188508						3.903	0.1925	0.1600 to 0.2285	0.996		0.1885
			3.9173	0.003992	0.1888	0.184808						3.917	0.1888	0.1565 to 0.2246	0.996		0.1848
			3.9237	0.003992	0.1869	0.182908						3.924	0.1869	0.1548 to 0.2226	0.996		0.1829
			3.929	0.003992	0.185	0.181008						3.929	0.185	0.1530 to 0.2206	0.996		0.181
			3.9398	0.003992	0.1832	0.179208						3.94	0.1832	0.1513 to 0.2186	0.996		0.1792
			3.9529	0.003992	0.1813	0.177308						3.953	0.1813	0.1496 to 0.2166	0.996		0.1773
			3.9599	0.003992	0.1794	0.175408						3.96	0.1794	0.1478 to 0.2146	0.996		0.1754
			3.9667	0.003992	0.1776	0.173608						3.967	0.1776	0.1461 to 0.2126	0.996		0.1736
			3.9859	0.003992	0.1757	0.171708						3.986	0.1757	0.1444 to 0.2106	0.996		0.1717
			4.0202	0.003992	0.172	0.168008						4.02	0.172	0.1409 to 0.2067	0.996		0.168
			4.0515	0.003992	0.1701	0.166108						4.051	0.1701	0.1392 to 0.2047	0.996		0.1661
			4.0816	0.003992	0.1664	0.162408						4.082	0.1664	0.1358 to 0.2007	0.996		0.1624
			4.104	0.003992	0.1645	0.160508						4.104	0.1645	0.1341 to 0.1987	0.996		0.1605
			4.1113	0.003992	0.1626	0.158608						4.111	0.1626	0.1323 to 0.1967	0.996		0.1586
			4.1358	0.003992	0.1607	0.156708						4.136	0.1607	0.1306 to 0.1947	0.996		0.1567
			4.1564	0.003992	0.1589	0.154908						4.156	0.1589	0.1289 to 0.1927	0.996		0.1549
			4.1783	0.003992	0.157	0.153008						4.178	0.157	0.1272 to 0.1907	0.996		0.153
			4.2053	0.003992	0.1551	0.151108						4.205	0.1551	0.1255 to 0.1886	0.996		0.1511
			4.2203	0.001996	0.1551	0.153104						4.22	0.1551	0.1255 to 0.1886	0.998		0.1531
			4.2305	0.001996	0.1533	0.151304						4.23	0.1533	0.1238 to 0.1866	0.998		0.1513
			4.2592	0.001996	0.1514	0.149404						4.259	0.1514	0.1221 to 0.1846	0.998		0.1494
			4.3051	0.001996	0.1495	0.147504						4.305	0.1495	0.1204 to 0.1826	0.998		0.1475
			4.3327	0.001996	0.1477	0.145704						4.333	0.1477	0.1187 to 0.1806	0.998		0.1457
			4.3453	0.001996	0.1458	0.143804						4.345	0.1458	0.1170 to 0.1786	0.998		0.1438
			4.3922	0.001996	0.1421	0.140104						4.392	0.1421	0.1136 to 0.1745	0.998		0.1401
			4.4405	0.001996	0.1402	0.138204						4.441	0.1402	0.1119 to 0.1725	0.998		0.1382
			4.4482	0.001996	0.1383	0.136304						4.448	0.1383	0.1102 to 0.1705	0.998		0.1363
			4.4568	0.001996	0.1364	0.134404						4.457	0.1364	0.1085 to 0.1685	0.998		0.1344
			4.4641	0	0.1364	0.1364						4.464	0.1364	0.1085 to 0.1685	1		0.1364
			4.4738	0	0.1346	0.1346						4.474	0.1346	0.1068 to 0.1665	1		0.1346
			4.4812	0	0.1327	0.1327						4.481	0.1327	0.1051 to 0.1644	1		0.1327
			4.4964	0	0.1308	0.1308						4.496	0.1308	0.1034 to 0.1624	1		0.1308
			4.5215	0	0.129	0.129						4.521	0.129	0.1018 to 0.1604	1		0.129
			4.569	0	0.1271	0.1271						4.569	0.1271	0.1001 to 0.1583	1		0.1271
			4.608	0	0.1252	0.1252						4.608	0.1252	0.09839 to 0.1563	1		0.1252
			4.627	0	0.1234	0.1234						4.627	0.1234	0.09671 to 0.1543	1		0.1234
			4.6806	0	0.1215	0.1215						4.681	0.1215	0.09503 to 0.1522	1		0.1215
			4.7369	0	0.1196	0.1196						4.737	0.1196	0.09336 to 0.1502	1		0.1196
			4.7616	0	0.1178	0.1178						4.762	0.1178	0.09168 to 0.1481	1		0.1178
			4.7824	0	0.1159	0.1159						4.782	0.1159	0.09001 to 0.1461	1		0.1159
			4.7992	0	0.114	0.114						4.799	0.114	0.08835 to 0.1440	1		0.114
			4.8138	0	0.1121	0.1121						4.814	0.1121	0.08668 to 0.1420	1		0.1121
			4.8305	0	0.1103	0.1103						4.83	0.1103	0.08502 to 0.1399	1		0.1103
			4.843	0	0.1084	0.1084						4.843	0.1084	0.08336 to 0.1379	1		0.1084
			4.8623	0	0.1065	0.1065						4.862	0.1065	0.08170 to 0.1358	1		0.1065
			4.88	0	0.1047	0.1047						4.88	0.1047	0.08004 to 0.1338	1		0.1047
			4.8972	0	0.1028	0.1028						4.897	0.1028	0.07839 to 0.1317	1		0.1028
			4.9716	0	0.1009	0.1009						4.972	0.1009	0.07674 to 0.1296	1		0.1009
			5.0578	0	0.0991	0.0991						5.058	0.0991	0.07509 to 0.1276	1		0.0991
			5.16	0	0.0972	0.0972						5.16	0.0972	0.07344 to 0.1255	1		0.0972
			5.2651	0	0.0953	0.0953						5.265	0.0953	0.07180 to 0.1234	1		0.0953
			5.3287	0	0.0935	0.0935						5.329	0.0935	0.07016 to 0.1214	1		0.0935
			5.4013	0	0.0916	0.0916						5.401	0.0916	0.06853 to 0.1193	1		0.0916
			5.4371	0	0.0897	0.0897						5.437	0.0897	0.06689 to 0.1172	1		0.0897
			5.4482	0	0.0879	0.0879						5.448	0.0879	0.06526 to 0.1151	1		0.0879
			5.4961	0	0.086	0.086						5.496	0.086	0.06364 to 0.1130	1		0.086
			5.5586	0	0.0841	0.0841						5.559	0.0841	0.06201 to 0.1109	1		0.0841
			5.5838	0	0.0822	0.0822						5.584	0.0822	0.06039 to 0.1088	1		0.0822
			5.6026	0	0.0804	0.0804						5.603	0.0804	0.05878 to 0.1067	1		0.0804
			5.6243	0	0.0785	0.0785						5.624	0.0785	0.05716 to 0.1046	1		0.0785
			5.6417	0	0.0766	0.0766						5.642	0.0766	0.05555 to 0.1025	1		0.0766
			5.6603	0	0.0748	0.0748						5.66	0.0748	0.05395 to 0.1004	1		0.0748
			5.6905	0	0.0729	0.0729						5.69	0.0729	0.05235 to 0.09831	1		0.0729
			5.7359	0	0.0673	0.0673						5.736	0.0673	0.04757 to 0.09194	1		0.0673
			5.7597	0	0.0654	0.0654						5.76	0.0654	0.04599 to 0.08981	1		0.0654
			5.8274	0	0.0636	0.0636						5.827	0.0636	0.04441 to 0.08768	1		0.0636
			5.901	0	0.0617	0.0617						5.901	0.0617	0.04284 to 0.08554	1		0.0617
			5.9545	0	0.0598	0.0598						5.955	0.0598	0.04127 to 0.08339	1		0.0598
			6.0313	0	0.0579	0.0579						6.031	0.0579	0.03971 to 0.08124	1		0.0579
			6.067	0	0.0561	0.0561						6.067	0.0561	0.03815 to 0.07909	1		0.0561
			6.0913	0	0.0542	0.0542						6.091	0.0542	0.03660 to 0.07692	1		0.0542
			6.1508	0	0.0505	0.0505						6.151	0.0505	0.03352 to 0.07258	1		0.0505
			6.2619	0	0.0486	0.0486						6.262	0.0486	0.03199 to 0.07040	1		0.0486
			6.3391	0	0.0467	0.0467						6.339	0.0467	0.03047 to 0.06821	1		0.0467
			6.3599	0	0.0449	0.0449						6.36	0.0449	0.02895 to 0.06601	1		0.0449
			6.3798	0	0.043	0.043						6.38	0.043	0.02744 to 0.06381	1		0.043
			6.4181	0	0.0411	0.0411						6.418	0.0411	0.02595 to 0.06160	1		0.0411
			6.4758	0	0.0393	0.0393						6.476	0.0393	0.02446 to 0.05938	1		0.0393
			6.6983	0	0.0374	0.0374						6.698	0.0374	0.02298 to 0.05715	1		0.0374
			6.9668	0	0.0355	0.0355						6.967	0.0355	0.02151 to 0.05491	1		0.0355
			7.2685	0	0.0336	0.0336						7.269	0.0336	0.02006 to 0.05265	1		0.0336
			7.5938	0	0.0318	0.0318						7.594	0.0318	0.01862 to 0.05039	1		0.0318
			7.7604	0	0.0299	0.0299						7.76	0.0299	0.01719 to 0.04811	1		0.0299
			8.0076	0	0.028	0.028						8.008	0.028	0.01578 to 0.04582	1		0.028
			8.1909	0	0.0262	0.0262						8.191	0.0262	0.01438 to 0.04352	1		0.0262
			8.2201	0	0.0243	0.0243						8.22	0.0243	0.01300 to 0.04119	1		0.0243
			8.3509	0	0.0224	0.0224						8.351	0.0224	0.01164 to 0.03885	1		0.0224
			8.4808	0	0.0206	0.0206						8.481	0.0206	0.01031 to 0.03649	1		0.0206
			8.5357	0	0.0187	0.0187						8.536	0.0187	0.008999 to 0.03411	1		0.0187
			8.7302	0	0.0168	0.0168						8.73	0.0168	0.007720 to 0.03169	1		0.0168
			9.0111	0	0.015	0.015						9.011	0.015	0.006477 to 0.02925	1		0.015
			9.2095	0	0.0131	0.0131						9.21	0.0131	0.005276 to 0.02677	1		0.0131
			9.3095	0	0.0112	0.0112						9.31	0.0112	0.004127 to 0.02425	1		0.0112
			9.4035	0	0.0093458	0.0093458						9.404	0.009346	0.003041 to 0.02167	1		0.009346
			9.6257	0	0.0074766	0.0074766						9.626	0.007477	0.002041 to 0.01903	1		0.007477
			10.093	0	0.0056075	0.0056075						10.09	0.005607	0.001158 to 0.01630	1		0.005607
			10.7978	0	0.0037383	0.0037383						10.8	0.003738	0.000453 to 0.01344	1		0.003738
			11.4271	0	0.0018692	0.0018692						11.43	0.001869	4.732e-05 to 0.01037	1		0.001869
				0	0	0
