# Supplementary material for: Variable Rate of D-dimer Predicts Venous Thromboembolism in Postoperative Fracture Patients: A Single-Center Retrospective Cohort Study
Source: Research Square preprint supplement (doi:10.21203/rs.3.rs-7878480/v1), 2025-12-09
Supplement: Supplementary file 10 [file ce340e96ea762e4b40669681.xlsx]

## Sheet: Sheet1
序号	出院科室	入院日期	出院日期	病案号	病人	性别	年龄	主诊断	非主诊断	转归	主任	主治	住院	手术
					姓名					情况	医师	医师	医师	名称
1	C05疼痛科	2020-09-14	2020-10-18	3028899	黄春桃	女	58Y	恶性肿瘤的维持性化疗	肺恶性肿瘤;糖尿病;胸腔积液;心包积液;下肢静脉炎和血栓性静脉炎;肺部感染;肋骨骨折;肝硬化;高血压病;肺结节	好转	陈文俊	陈文俊	何泽来
2	C07泌尿	2020-10-08	2020-11-08	3035958	牟加福	男	76Y	股骨颈骨折	血尿;前列腺增生;下肢静脉血栓形成	好转	竺海波	竺海波	虞海峰	下腔静脉滤器置入术;股骨骨折闭合复位术
3	C07泌尿	2020-12-01	2020-12-13	3047911	王昌焕	男	74Y	前列腺恶性肿瘤	股骨颈骨折;下肢动脉粥样硬化;脂肪肝;后天性肾囊肿;前列腺结节;下肢静脉血栓形成	未愈	何有华	张磊	王帅彬	股骨骨折闭合复位术
4	C10感染内科	2020-02-01	2020-02-25	2953122	潘国新	男	35Y	脓毒血症	下肢深静脉血栓性静脉炎;拇指骨折;截瘫;特指手术后状态	治愈	潘陈为	郑毅	李杰	股静脉穿刺术;下腔静脉滤器置入术
5	C10感染内科	2020-11-07	2020-11-15	3038267	徐定虎	男	93Y	肺部感染	尿潴留;前列腺结石;前列腺增生;肝囊肿;下肢静脉血栓形成;阵发性室上性心动过速;高血压性心脏病;动脉粥样硬化;单纯性肾囊肿;胫前动脉狭窄;心功能Ⅲ级;胸椎骨折	好转	林巍	周光耀	林秀珍
6	D06(ICU)	2020-09-06	2020-10-15	3028013	高仁杰	男	66Y	创伤性硬膜下出血	特指手术后状态;膀胱造口状态;下肢深静脉血栓性静脉炎;急性失血性贫血;锁骨骨折;创伤性尿道断裂;骨盆骨折;多发性颈椎骨折;肺部感染;肺挫伤;创伤性脑血肿;失血性休克;创伤性蛛网膜下腔出血;创伤性腹膜后血肿	未愈	程碧环	戴凌燕	戴凌燕
7	D06(ICU)	2020-09-12	2020-12-15	3048589	王德焕	男	68Y	脑挫伤	创伤性硬膜下出血;后天性肾囊肿;创伤性气胸;肺挫伤;创伤性胸腔积液;髌骨骨折;下消化道出血;多发性肋骨骨折;肩胛骨骨折;头皮挫伤;开放性背部损伤;下肢动脉粥样硬化;股静脉血栓性静脉炎;下肢深静脉血栓性静脉炎	好转	庄荣	郭献阳	郭献阳	下腔静脉滤器置入术;股静脉穿刺术
8	D07儿童骨科、骨盆外科	2020-01-16	2020-01-28	2945134	梁贤银	男	62Y	股骨粗隆下骨折	下肢深静脉血栓性静脉炎	治愈	孔建中	孔建中	柯陈荣	股骨骨折切开复位术
9	D07儿童骨科、骨盆外科	2020-01-27	2020-02-03	2947467	朱文春	男	82Y	股骨粗隆间骨折	人工髋关节;下肢深静脉血栓性静脉炎;下肢动脉粥样硬化;特指手术后状态	治愈	孔建中	孔建中	柯陈荣	股骨骨折闭合复位术
10	D07儿童骨科、骨盆外科	2020-02-13	2020-02-19	2951465	余承环	男	69Y	髌骨骨折	下肢静脉炎和血栓性静脉炎;下肢动脉粥样硬化;股四头肌腱断裂;高血压病	治愈	孔建中	孔建中	柯陈荣	髌骨骨折切开复位术;股四头肌成形术
11	D07儿童骨科、骨盆外科	2020-02-02	2020-02-25	2953099	柯有余	男	65Y	开放性足损伤	跖趾关节脱位;下肢静脉炎和血栓性静脉炎;跖骨骨折	治愈	翁益民	翁益民	翁益民	跖骨骨折切开复位术;皮肤和皮下坏死组织切除清创术;皮肤和皮下组织切开引流术
12	D07儿童骨科、骨盆外科	2020-02-14	2020-02-29	2954390	高支英	女	57Y	股骨颈骨折	下肢静脉炎和血栓性静脉炎;下肢动脉粥样硬化	治愈	翁益民	翁益民	翁益民	股骨骨折闭合复位术
13	D07儿童骨科、骨盆外科	2020-03-12	2020-04-01	2964715	郑明栋	男	79Y	股骨粗隆间骨折	2型糖尿病;肝恶性细胞瘤;腹水;前列腺结石;下肢静脉血栓形成;低钾血症;膀胱恶性肿瘤;胰腺恶性肿瘤;单纯性肾囊肿;下肢动脉粥样硬化;高血压病	治愈	孔建中	孔建中	柯陈荣	股骨骨折闭合复位术
14	D07儿童骨科、骨盆外科	2020-04-10	2020-04-20	2970243	郑云元	男	46Y	髌骨骨折	下肢静脉血栓形成	治愈	孔建中	王鉴顺	柯陈荣	股静脉穿刺术;下腔静脉滤器置入术;髌骨骨折切开复位术
15	D07儿童骨科、骨盆外科	2020-04-19	2020-04-27	2972566	钱春媚	女	77Y	股骨粗隆间骨折	2型糖尿病;支气管扩张;下肢静脉炎和血栓性静脉炎;肺部感染;股骨粗隆下骨折	治愈	孔建中	王鉴顺	柯陈荣	股骨骨折切开复位术
16	D07儿童骨科、骨盆外科	2020-06-12	2020-06-24	2990808	谷春妹	女	74Y	股骨颈骨折	高血压病;下肢静脉血栓形成	治愈	孔建中	陈鸿亮	项光恒	全髋关节置换术
17	D07儿童骨科、骨盆外科	2020-07-10	2020-07-18	2998994	刘俊	女	31Y	骨盆骨折	跖骨骨折;跟骨骨折;肺挫伤;面部挫伤;髋臼骨折;踝关节半脱位;距骨骨折;足舟状骨骨折;腰椎骨折;尺骨桡骨远端骨折;下肢静脉血栓形成;骶骨骨折;耻骨骨折;股骨干骨折;外踝骨折;失血性休克;多发性肋骨骨折	好转	翁益民	翁益民	郭蕾	髂内动脉栓塞术
18	D07儿童骨科、骨盆外科	2020-07-12	2020-07-22	3000265	王少华	男	60Y	股骨粗隆间骨折	下肢动脉粥样硬化;高血压病;单纯性肾囊肿;前列腺结石;下肢静脉血栓形成	治愈	孔建中	陈鸿亮	项光恒	股骨骨折切开复位钢针内固定术
19	D07儿童骨科、骨盆外科	2020-07-18	2020-07-25	3001259	吴招格	男	65Y	骨盆骨折	多发性肋骨骨折;手术后恢复期;下肢静脉血栓形成;吸入性肺炎	治愈	孔建中	陈鸿亮	项光恒	骨盆骨折切开复位钢针内固定术
20	D07儿童骨科、骨盆外科	2020-07-13	2020-08-01	3003499	黄彩弟	女	75Y	尺骨桡骨骨干骨折	肝损伤;老年性脑萎缩;下肢静脉血栓形成;肝囊肿;肾错构瘤;内踝骨折;距骨骨折;多发性肋骨骨折;单纯性肾囊肿	治愈	孔建中	孔建中	项光恒	桡骨骨折切开复位螺钉内固定术;尺骨骨折切开复位螺钉内固定术
21	D07儿童骨科、骨盆外科	2020-08-17	2020-09-02	3014395	林燕英	女	68Y	股骨骨折	高血压病;2型糖尿病;肾上腺肿瘤;髌骨骨折;脂肪肝;肺部感染;胸腔积液;下肢静脉血栓形成	治愈	孔建中	孔建中	陈墨川	髌骨骨折切开复位螺钉内固定术;下腔静脉滤器置入术;股骨骨折切开复位钢针内固定术
22	D07儿童骨科、骨盆外科	2020-08-28	2020-09-02	3014398	陈玉梅	女	85Y	肱骨上端骨折	桡骨下端骨折;单纯性肾囊肿;骨质疏松;下肢静脉血栓形成	治愈	孔建中	孔建中	陈墨川	肱骨骨折切开复位钢针内固定术
23	D07儿童骨科、骨盆外科	2020-08-18	2020-09-02	3014409	邢喜芬	女	96Y	股骨粗隆间骨折	肺部感染;陈旧性肋骨骨折;胆囊结石;单纯性肾囊肿;下肢静脉血栓形成;完全性右束支传导阻滞;房性早搏	治愈	孔建中	孔建中	陈墨川	股骨骨折闭合复位钢针内固定术
24	D07儿童骨科、骨盆外科	2020-11-19	2020-11-30	3043544	陈岩金	男	88Y	股骨颈骨折	下肢动脉粥样硬化;单纯性肾囊肿;前列腺结石;前列腺增生;下肢静脉血栓形成	治愈	翁益民	翁益民	柯陈荣	人工股骨头置换术
25	D07儿童骨科、骨盆外科	2020-12-04	2020-12-14	3048353	陈小华	女	57Y	闭合性胫骨平台骨折	脂肪肝;下肢静脉血栓形成	治愈	孔建中	孔建中	陈墨川	膝关节半月板成形术;胫骨骨折切开复位钢板内固定术
26	D08(骨病)	2020-06-03	2020-06-15	2988005	林菊花	女	84Y	股骨颈骨折	下肢动脉粥样硬化;下肢静脉血栓形成	治愈	陈龙	陈龙	应晓洲	人工股骨头置换术
27	D08(骨病)	2020-11-03	2020-11-11	3037084	郑加波	男	66Y	髌骨骨折	四头肌和肌腱损伤;肾超声检查异常;肾结石;肾错构瘤;前列腺增生;肝囊肿;下肢静脉血栓形成	治愈	陈龙	陈龙	应晓洲	髌骨骨折切开复位螺钉内固定术
28	D08(骨病)	2020-11-12	2020-11-28	3042704	李玉妹	女	85Y	踝骨闭合性骨折	腰椎间盘突出;腰椎退行性病变;腰椎骨折;脂肪肝;下肢静脉血栓形成	治愈	余可和	余可和	项光恒	踝关节骨折切开复位钢针内固定术
29	D09(创伤1)	2015-12-30	2020-01-12	2940271	潘顺久	男	81Y	股骨颈骨折	肾结石;单纯性肾囊肿;下肢特指深部脉管静脉炎和血栓性静脉炎;下肢动脉粥样硬化	治愈	汤骏	汤骏	周一飞	人工股骨头置换术
30	D09(创伤1)	2020-01-03	2020-01-14	2940947	陈阿翠	女	78Y	股骨颈骨折	高血压病;下肢特指深部脉管静脉炎和血栓性静脉炎	治愈	杨雷	杨雷	罗鹏	人工股骨头置换术
31	D09(创伤1)	2020-01-08	2020-01-18	2942003	谢少华	女	53Y	髌骨骨折	下肢深静脉血栓性静脉炎;子宫平滑肌瘤	治愈	赵友明	赵友明	郭伟军	股静脉穿刺术;下腔静脉滤器置入术;髌骨骨折切开复位术
32	D09(创伤1)	2020-01-07	2020-01-19	2942475	方红弟	女	81Y	胫腓骨干骨折	单纯性肾囊肿;肾结石;下肢深静脉血栓性静脉炎;高血压病	治愈	杨雷	杨雷	罗鹏	胫骨骨折切开复位钢板内固定术
33	D09(创伤1)	2020-01-07	2020-01-22	2943497	徐小女	女	78Y	股骨颈骨折	颈动脉硬化;下肢动脉粥样硬化;不完全性右束支传导阻滞;高血压病;2型糖尿病;下肢深静脉血栓性静脉炎;腔隙性脑梗死;房性早搏	治愈	赵友明	赵友明	郭伟军	全髋关节置换术
34	D09(创伤1)	2020-01-13	2020-01-27	2945002	林菊	女	80Y	股骨粗隆间骨折	下肢动脉粥样硬化;高血压病;膝关节病;下肢深静脉血栓性静脉炎	治愈	杨雷	杨雷	罗鹏	股骨骨折闭合复位髓内针内固定术
35	D09(创伤1)	2015-12-31	2020-01-30	2946157	郭凯林	男	50Y	身体特指复合部位骨折	胫骨上端骨折;陈旧性腓骨骨折;陈旧性髌骨骨折;多发性肋骨骨折;下肢深静脉血栓性静脉炎;肺挫伤;跖骨骨折;肱骨骨折;骨盆骨折;腰椎骨折;谵妄;胸腔积液;股骨特指部位骨折;股骨下端骨折;特指趾骨骨折	治愈	赵友明	赵友明	郭伟军	趾骨骨折切开复位术;皮肤缝合术;皮肤及皮下组织清创术;股骨骨折切开复位术;胫骨骨折切开复位术
36	D09(创伤1)	2020-01-20	2020-02-01	2946797	胡阿花	女	89Y	股骨粗隆间骨折	下肢动脉硬化闭塞症;下肢深静脉血栓性静脉炎	治愈	杨雷	杨雷	罗鹏	股骨骨折闭合复位髓内针内固定术
37	D09(创伤1)	2020-02-14	2020-02-24	2952993	黄翠花	女	70Y	股骨颈骨折	下肢动脉粥样硬化;高血压病;2型糖尿病;下肢深静脉血栓性静脉炎	治愈	汤骏	周一飞	周一飞	人工股骨头置换术
38	D09(创伤1)	2020-02-26	2020-03-08	2957181	周龙顺	男	77Y	外踝骨折	下肢深静脉血栓性静脉炎;腰椎骨折	好转	汤骏	周一飞	周一飞
39	D09(创伤1)	2020-02-25	2020-03-14	2958974	林梅花	女	72Y	股骨骨折	下肢动脉粥样硬化;高血压病;下肢深静脉血栓性静脉炎;单纯性肾囊肿;膝关节病	治愈	杨雷	杨雷	项光恒	股骨骨折切开复位钢针内固定术
40	D09(创伤1)	2020-03-11	2020-04-13	2968232	陈昌平	男	47Y	骨盆骨折	特指手术后状态;腰骶部脊柱骨折;下肢深静脉血栓性静脉炎;胸腔积液;耻骨骨折;骶骨骨折;肺挫伤	治愈	赵友明	赵友明	郭伟军	骨盆骨折切开复位钢针内固定术
41	D09(创伤1)	2020-04-14	2020-04-25	2971885	应如法	男	69Y	骨盆骨折	牙齿缺少;多发性肋骨骨折;下肢深静脉血栓性静脉炎;眶骨骨折;腰背痛;胸腔积液	好转	赵友明	赵友明	赵友明	骨盆骨折切开复位螺钉内固定术
42	D09(创伤1)	2020-04-22	2020-05-04	2974772	陈继贤	男	82Y	股骨粗隆间骨折	前列腺结石;颈动脉硬化;心房颤动;不完全性右束支传导阻滞;高血压病;肾结石;下肢深静脉血栓性静脉炎	治愈	杨雷	杨雷	项光恒	股骨骨折闭合复位髓内针内固定术
43	D09(创伤1)	2020-05-18	2020-05-25	2981537	徐明星	男	70Y	髌骨骨折	下肢静脉血栓形成	治愈	陈龙	陈龙	陈龙	髌骨骨折切开复位张力带钢丝内固定术
44	D09(创伤1)	2020-05-19	2020-05-27	2982261	罗本艮	男	59Y	髋臼骨折	创伤性牙齿脱落;下肢动脉粥样硬化;下肢静脉血栓形成	未愈	杨雷	杨雷	项光恒
45	D09(创伤1)	2020-06-06	2020-06-20	2989729	陈玉梅	女	73Y	肱骨上端骨折	下肢动脉粥样硬化;骨盆骨折;耻骨骨折;骶骨骨折;下肢静脉血栓形成;糖尿病	好转	汤骏	汤骏	冯永增
46	D09(创伤1)	2020-06-16	2020-07-06	2995019	吴彩莲	女	87Y	股骨粗隆间骨折	下肢静脉血栓形成;特指手术后状态;高血压病;糖尿病;结肠恶性肿瘤;肺部感染;褥疮	治愈	杨雷	杨雷	杨雷	股骨骨折切开复位螺钉内固定术
47	D09(创伤1)	2020-06-19	2020-07-09	2996051	张文林	男	66Y	髂骨骨折	盆腔损伤;髋臼骨折;下腔静脉血栓形成;耻骨骨折;头皮血肿	治愈	汤骏	冯永增	冯永增	股静脉穿刺术;骨盆骨折切开复位钢针内固定术;髂骨骨折切开复位钢针内固定术;下肢静脉造影;下腔静脉滤器置入术
48	D09(创伤1)	2020-07-01	2020-07-12	2996990	张茂仓	男	53Y	髋臼骨折	下肢静脉血栓形成	治愈	汤骏	汤骏	冯永增	髋臼置换术
49	D09(创伤1)	2020-07-22	2020-08-04	3004766	周胜香	女	68Y	股骨粗隆间骨折	高血压病;糖尿病;下肢静脉血栓形成	治愈	汤骏	冯永增	冯永增	股骨骨折切开复位钢针内固定术
50	D09(创伤1)	2020-07-14	2020-08-10	3006540	潘德木	男	56Y	胫骨上端骨折	特指手术后状态;特指趾骨骨折;尺骨下端骨折;多处挫伤;肺部感染;肺栓塞;下肢静脉血栓形成;胸腔积液;肋骨骨折	治愈	赵友明	赵友明	赵友明	胫骨骨折切开复位螺钉内固定术
51	D09(创伤1)	2020-08-13	2020-08-19	3009989	谢冬姐	女	87Y	股骨颈骨折	下肢动脉硬化闭塞症;胆囊结石;主动脉瓣疾患;脂肪肝;下肢静脉血栓形成;心脏病;心脏扩大	治愈	赵友明	赵友明	赵友明	股骨骨折切开复位钢丝内固定术
52	D09(创伤1)	2020-08-25	2020-08-30	3013636	曾玉莲	女	89Y	股骨粗隆间骨折	下肢静脉血栓形成;肥厚型梗阻性心肌病;创伤性蛛网膜下腔出血;高血压病;创伤性硬膜下出血	未愈	杨雷	杨雷	吴剑彬	股静脉穿刺术;下肢静脉滤器置入术
53	D09(创伤1)	2020-08-09	2020-09-09	3016940	潘祥微	女	61Y	髌骨骨折	特指脑梗死;下肢静脉血栓形成;颈动脉硬化;胆囊结石;特指心律失常;二尖瓣返流;下肢皮肤套脱伤;高血压病	治愈	陈龙	陈龙	应晓洲	髌骨骨折切开复位螺钉内固定术;下肢韧带缝合术;皮肤和皮下组织切开引流术
54	D09(创伤1)	2020-09-15	2020-09-30	3023818	颜长根	男	63Y	闭合性胫骨平台骨折	特指手术后状态;心房颤动;膝关节特指部位扭伤;膝关节副韧带扭伤;高血压病;外侧半月板损伤;室性早搏;肱骨下端骨折;下肢静脉血栓形成;室性心动过速	治愈	赵友明	赵友明	郭伟军	胫骨骨折切开复位钢板内固定术;膝关节病损切除术;下肢韧带缝合术
55	D09(创伤1)	2020-09-21	2020-09-30	3023886	颜碎绿	女	87Y	股骨粗隆间骨折	下肢动脉粥样硬化;高血压病;后天性肾囊肿;肺气肿;下肢静脉血栓形成	治愈	陈龙	陈龙	应晓洲	股骨骨折切开复位钢针内固定术
56	D09(创伤1)	2020-09-11	2020-10-24	3031013	陈连松	男	53Y	股骨骨折	下肢肿胀;脂肪肝;股动脉损伤;髋和大腿水平股静脉损伤;肺挫伤;高血压病;膝关节副韧带扭伤;静脉栓塞和血栓形成;膝关节特指部位扭伤;骨筋膜室综合征;胫骨骨折累及踝关节;膝关节积液;多发性膝关节损伤	治愈	陈龙	陈龙	应晓洲	皮肤和皮下组织切开引流术;足血管、神经、肌腱探查术;股骨骨折闭合复位术;皮肤和皮下坏死组织切除清创术;下肢韧带缝合术;皮肤及皮下组织清创术
57	D09(创伤1)	2020-11-03	2020-11-05	3035225	夏早菊	女	92Y	股骨粗隆间骨折	动脉粥样硬化;下肢动脉硬化闭塞症;Ⅰ度房室传导阻滞;静脉栓塞和血栓形成;室性早搏;贫血;低蛋白血症	未愈	陈龙	陈龙	应晓洲
58	D10(创伤2)	2015-12-20	2020-01-07	2938920	曾凤钗	女	79Y	股骨颈骨折	泌尿道感染;完全性右束支传导阻滞;肱骨上端骨折;下腔静脉血栓形成;多发性脑梗死;房性早搏;菌血症	治愈	陈华	陈华	余贤斌	肱骨骨折切开复位钢板内固定术;人工股骨头置换术
59	D10(创伤2)	2015-12-17	2020-01-09	2939463	王兰香	女	75Y	股骨颈骨折	糖尿病;静脉栓塞和血栓形成;高血压病	治愈	黄俊武	黄俊武	李振兴	人工股骨头置换术
60	D10(创伤2)	2020-01-03	2020-01-12	2940070	朱清银	男	61Y	股骨粗隆间骨折	动脉栓塞和血栓形成	治愈	黄义星	黄义星	黄义星	下腔静脉滤器置入术;股骨骨折闭合复位螺钉内固定术
61	D10(创伤2)	2015-12-04	2020-01-13	2940548	叶美贞	女	44Y	开放性尺骨骨折	开放性鹰嘴骨折;致密性骨炎;特指静脉栓塞和血栓形成;骨盆骨折;开放性胫骨骨折	治愈	黄俊武	黄俊武	李振兴	尺骨骨折切开复位钢针内固定术;胫骨骨折切开复位钢针内固定术;盆骨外固定术
62	D10(创伤2)	2015-12-24	2020-01-14	2940892	胡鹏	男	70Y	胫腓骨闭合性骨折	多发性脑梗死;腔隙性脑梗死;特指静脉栓塞和血栓形成;耻骨骨折;髂骨骨折;老年性脑萎缩;多发性腰椎骨折;腰椎滑脱;腰椎间盘突出	治愈	陈华	陈华	余贤斌	腓骨骨折闭合复位术;胫骨骨折切开复位钢板内固定术
63	D10(创伤2)	2020-01-11	2020-01-19	2942389	王碎香	女	86Y	股骨粗隆间骨折	胆囊结石;单纯性肾囊肿;特指静脉栓塞和血栓形成;肝肿物;脂肪肝	治愈	石成弟	石成弟	项光恒	股骨骨折闭合复位螺钉内固定术
64	D10(创伤2)	2020-01-28	2020-02-15	2950201	范德来	男	71Y	开放性胫腓骨干骨折	下肢动脉粥样硬化;多处皮肤破损;心动过缓;肝大;特指静脉栓塞和血栓形成;房性早搏;皮肤挫伤;肝回声不均	治愈	陈华	陈华	余贤斌	胫骨骨折切开复位钢板内固定术
65	D10(创伤2)	2020-02-16	2020-03-10	2957684	徐松媛	女	89Y	股骨粗隆间骨折	肺动脉高压轻度;房性早搏;腹股沟斜疝;下肢动脉粥样硬化;高血压病;肱骨上端骨折;特指静脉栓塞和血栓形成;肺部感染	治愈	黄义星	黄义星	罗鹏	股静脉穿刺术;下肢静脉滤器置入术
66	D10(创伤2)	2020-03-14	2020-03-22	2961505	廖香弟	女	82Y	股骨粗隆间骨折	特指静脉栓塞和血栓形成;骨质疏松;单纯性肾囊肿;胆囊结石;特指手术后状态;下肢动脉粥样硬化	治愈	黄俊武	黄俊武	胡炜	股骨骨折闭合复位螺钉内固定术
67	D10(创伤2)	2020-05-02	2020-05-18	2979082	缪翠花	女	95Y	股骨颈骨折	下肢动脉粥样硬化;高血压病;房性早搏;下肢静脉血栓形成;阵发性心动过速	治愈	陈华	陈华	余贤斌	人工股骨头置换术
68	D10(创伤2)	2020-05-11	2020-05-30	2982979	应国岳	男	64Y	骨盆骨折	下肢静脉血栓形成;单纯性肾囊肿;多发性肋骨骨折;皮肤挫伤;头皮血肿;肺挫伤;腰椎骨折;气胸;胸腔积液	治愈	黄义星	黄义星	罗鹏	骨盆骨折切开复位钢板内固定术;盆骨外固定术;下腔静脉滤器置入术;股静脉穿刺术
69	D10(创伤2)	2020-05-15	2020-05-30	2983024	李卓英	女	59Y	开放性足损伤	跖骨骨折;下肢静脉血栓形成;特指手术后状态;皮肤挫伤	好转	黄俊武	黄俊武	胡炜	皮肤和皮下组织切开引流术;跖骨骨折切开复位钢针内固定术;皮肤及皮下组织清创术
70	D10(创伤2)	2020-07-08	2020-07-19	2999299	吴洪娒	女	90Y	股骨粗隆间骨折	下肢动脉粥样硬化;高血压病;下肢深静脉血栓性静脉炎	治愈	黄义星	黄义星	黄义星	股骨骨折闭合复位髓内针内固定术
71	D10(创伤2)	2020-07-15	2020-07-26	3001691	项公娒	女	85Y	股骨颈骨折	肱骨颈骨折;骨质疏松;下肢静脉血栓形成;下肢动脉粥样硬化	治愈	陈华	陈华	余贤斌	人工股骨头置换术
72	D10(创伤2)	2020-08-30	2020-09-12	3017756	毛冬梅	女	62Y	股骨颈骨折	腓骨干骨折;耻骨骨折;膀胱结石;创伤性硬膜下出血;肾结石;静脉栓塞和血栓形成;开放性脑挫伤;内踝骨折	治愈	石成弟	石成弟	石成弟	肝静脉插管术;人工股骨头置换术
73	D10(创伤2)	2020-09-02	2020-09-13	3018038	王余尽	女	75Y	股骨颈骨折	肾结石;下肢静脉血栓形成;手术后随诊检查	治愈	黄义星	黄义星	张儒	全髋关节置换术;股静脉穿刺术
74	D10(创伤2)	2020-10-04	2020-10-17	3028526	金春花	女	74Y	髌骨骨折	骨软骨炎;高血压病;2型糖尿病;脂肪肝;下肢动脉粥样硬化;下肢静脉血栓形成	好转	黄义星	黄义星	张儒	髌骨骨折切开复位术
75	D10(创伤2)	2020-11-16	2020-12-05	3045140	周彩凤	女	83Y	股骨颈骨折	下肢动脉粥样硬化;后天性肾囊肿;主动脉钙化;肺部感染;下肢静脉血栓形成;高血压病	治愈	石成弟	石成弟	项光恒	人工股骨头置换术
76	D10(创伤2)	2020-11-24	2020-12-07	3046008	刘江苹	男	30Y	胫骨骨折	皮肤挫伤;下肢静脉血栓形成;肾结石;下颌骨骨折;腓骨骨折	治愈	黄义星	黄义星	张儒	胫骨骨折切开复位术;皮肤和皮下坏死组织切除清创术;下颌骨骨折切开复位内固定术
77	D10(创伤2)	2020-11-30	2020-12-10	3046971	刘爱莲	女	62Y	跟骨骨折	慢性浅表性胃炎;跖骨骨折;胆囊息肉;静脉栓塞和血栓形成;肝血管瘤	治愈	石成弟	石成弟	项光恒	跟骨骨折切开复位术
78	D10(创伤2)	2020-12-07	2020-12-13	3047853	赖连妹	女	87Y	股骨颈骨折	骨质疏松;下肢特指深部脉管静脉炎和血栓性静脉炎;肺部感染;低色素性贫血	好转	陈华	孙辽军	216123
79	D10(创伤2)	2020-12-10	2020-12-28	3052851	陈玉翠	女	86Y	股骨颈骨折	肱骨上端骨折;盲，单眼;动脉硬化性脑病;多发性脑梗死;后天性肾囊肿;下肢动脉粥样硬化;下肢静脉血栓形成;肺恶性肿瘤个人史	治愈	石成弟	石成弟	项光恒	人工股骨头置换术
80	D11(创伤3)	2015-12-10	2020-01-03	2937597	陈雪眉	女	90Y	股骨颈骨折	胸腔积液;多发性肋骨骨折;下肢血栓性静脉炎	治愈	余可和	余可和	余可和	人工股骨头置换术;下腔静脉滤器置入术
81	D11(创伤3)	2015-12-24	2020-01-08	2938978	邹益娥	女	61Y	楔状骨骨折(足)	下肢动脉粥样硬化;脑室扩张;脊柱侧弯;陈旧性肋骨骨折;外踝骨折;肺部阴影;腰椎峡部裂;下肢血栓性静脉炎;腰椎滑脱	治愈	洪建军	洪建军	胡炜	楔骨骨折切开复位螺钉内固定术;胫前肌缝合术
82	D11(创伤3)	2020-02-11	2020-02-22	2952033	戴美香	女	83Y	股骨粗隆间骨折	潜伏性梅毒;下肢动脉粥样硬化;膀胱憩室 ;泌尿器官诊断性影像检查异常所见;脂肪肝;下肢血栓性静脉炎	治愈	洪建军	洪建军	胡炜	股骨骨折闭合复位髓内针内固定术
83	D11(创伤3)	2020-01-27	2020-02-26	2953455	麻娇杏	女	48Y	耻骨骨折	多处挫伤;下肢血栓性静脉炎;颈椎间盘突出;颈椎退行性病变;骶骨骨折	治愈	洪建军	洪建军	胡炜	骨盆骨折闭合复位术;盆骨螺钉内固定术;盆骨外固定术
84	D11(创伤3)	2020-01-17	2020-02-29	2954620	金邦通	男	43Y	创伤性耻骨联合破裂	膀胱结石;肾积水伴输尿管结石;脂肪肝;皮下血肿;下肢深静脉血栓性静脉炎;骶髂关节脱位;局限性水肿;皮肤挫伤;骶骨骨折;输尿管积水;腰椎骨折;腰椎峡部裂	治愈	余可和	余可和	余可和	骨盆骨折切开复位钢针内固定术;盆骨外固定术
85	D11(创伤3)	2020-02-23	2020-03-07	2956481	詹阿娇	女	91Y	股骨颈骨折	下肢动脉硬化闭塞症;下肢动脉粥样硬化;肺动脉高压轻度;下肢血栓性静脉炎;心房颤动	治愈	王振文	水小龙	水小龙	人工股骨头置换术
86	D11(创伤3)	2020-03-14	2020-03-22	2961395	林银彩	女	79Y	股骨颈骨折	下肢血栓性静脉炎;下肢动脉粥样硬化;胆囊结石;后天性肾囊肿;骶髂关节炎;肺大泡	治愈	洪建军	陈鸿亮	陈鸿亮	人工股骨头置换术
87	D11(创伤3)	2020-03-14	2020-03-24	2961973	刘仁柳	男	77Y	股骨粗隆间骨折	主动脉瓣关闭不全;肝回声不均;后天性肾囊肿;特指不明确心脏病;前列腺结石;前列腺增生;下肢血栓性静脉炎;下肢动脉粥样硬化;特指主动脉瓣疾患	治愈	潘骏	潘骏	张儒	股骨骨折闭合复位螺钉内固定术
88	D11(创伤3)	2020-04-20	2020-04-27	2972715	潘志信	男	65Y	内踝骨折	前列腺增生;肝钙化灶;后天性肾囊肿;特指手术后状态;下肢深静脉血栓性静脉炎;前列腺结石	治愈	余可和	余可和	余可和	踝关节骨折切开复位钢针内固定术
89	D11(创伤3)	2020-05-07	2020-05-28	2982375	李忠良	男	79Y	髌骨骨折	耻骨骨折;肾错构瘤;前列腺结石;前列腺增生;下肢动脉粥样硬化;膝关节特指部位扭伤;膝关节十字韧带扭伤;膝关节副韧带扭伤;半月板撕裂，近期的;后天性肾囊肿;多发性肋骨骨折;下肢深静脉血栓性静脉炎;肩胛骨骨折;锁骨骨折	治愈	潘骏	潘骏	张儒	髌骨骨折切开复位张力带钢丝内固定术;股静脉穿刺术;下腔静脉滤器置入术
90	D11(创伤3)	2020-06-24	2020-06-29	2992465	胡方竹	女	87Y	股骨粗隆间骨折	胆囊结石;下肢静脉血栓形成;下肢动脉粥样硬化;肺动脉高压轻度	好转	潘骏	王鉴顺	王鉴顺
91	D11(创伤3)	2020-08-04	2020-08-18	3009293	郑雪吟	女	81Y	股骨粗隆间骨折	胆囊息肉;肝囊肿;下肢静脉血栓形成;肺气肿;胸腔积液	好转	潘骏	王鉴顺	王鉴顺	股骨骨折闭合复位髓内针内固定术
92	D11(创伤3)	2020-08-06	2020-08-25	3011719	楼东琴	女	82Y	股骨颈骨折	下肢动脉粥样硬化;高血压病;具有心脏起搏器;脑梗死;心脏病;间质性肾炎;肝囊肿;肺炎;下肢静脉血栓形成;髋关节痛	治愈	余可和	余可和	柯陈荣	人工股骨头置换术
93	D11(创伤3)	2020-09-28	2020-10-17	3028348	杨凤香	女	71Y	股骨颈骨折	下肢静脉血栓形成	治愈	王振文	王振文	水小龙	全髋关节置换术
94	D11(创伤3)	2020-10-18	2020-11-02	3033981	吴克火	男	84Y	股骨颈骨折	下肢静脉血栓形成;痛风;慢性支气管炎;脾大;肾萎缩;后天性肾囊肿;高血压病	治愈	王振文	水小龙	水小龙	人工股骨头置换术
95	D11(创伤3)	2020-11-14	2020-11-23	3041141	鲍承宣	男	67Y	髌骨骨折	高血压病;下肢静脉血栓形成	治愈	潘骏	冯永增	冯永增	髌骨骨折切开复位张力带钢丝内固定术
96	D11(创伤3)	2020-12-04	2020-12-19	3049743	倪爱兰	女	72Y	股骨颈骨折	高血压病;2型糖尿病;单眼白内障;下肢动脉粥样硬化;下肢静脉血栓形成	治愈	王振文	水小龙	水小龙	全髋关节置换术
97	D12(手外)	2020-10-22	2020-11-08	3036223	池存伍	男	62Y	股骨粗隆间骨折	前列腺结石;下肢静脉血栓形成;下肢动脉粥样硬化;肝硬化;脾大	治愈	余可和	余可和	项光恒	股骨骨折切开复位髓内针内固定术
98	D13(手外脊柱)	2020-04-05	2020-04-09	2966974	林芳翠	女	58Y	取除骨折内固定装置	胆囊结石;下肢静脉血栓形成	其他	黄俊武	黄俊武	薛星河	胫骨内固定物取出术
99	D14(脊柱)	2020-01-06	2020-01-28	2945341	颜正光	男	56Y	多发性胸椎骨折	面部挫伤;肋骨骨折;鼻骨骨折;前列腺增生;肝囊肿;胸腔积液;下肢动脉粥样硬化;头颈部软组织异物残留;慢性筛窦炎;下肢静脉炎和血栓性静脉炎;皮肤挫伤	治愈	倪文飞	倪文飞	吴爱悯	椎弓根钉内固定术;脊椎骨折复位术
100	D14(脊柱)	2020-05-05	2020-05-16	2978319	陈玉钗	女	79Y	多发性胸椎骨折	后天性肾囊肿;创伤性胸腔积液;陈旧性肋骨骨折;创伤性气胸;腰椎骨折;肝囊肿;下肢静脉血栓形成;下肢动脉粥样硬化;混合型颈椎病;高血压病;多发性损伤;骨质疏松伴病理性骨折	治愈	黄其杉	王胜	王胜	腰椎骨折球囊扩张成形术;胸椎骨折球囊扩张成形术
101	D14(脊柱)	2020-05-05	2020-05-16	2978326	周金蕊	女	64Y	腰椎骨折	下肢动脉粥样硬化;高血压病;骨质疏松伴病理性骨折;创伤性胸腔积液;硬膜外血肿;下肢静脉血栓形成	治愈	黄其杉	王胜	王胜	硬脑膜外血肿清除术;腰椎骨折球囊扩张成形术
102	D14(脊柱)	2020-05-09	2020-05-16	2978360	叶爱玉	女	65Y	腰椎骨折	下肢静脉血栓形成;特指手术后状态;腰椎间盘突出;骨质疏松;脂肪肝	好转	黄其杉	黄其杉	窦海成	经皮穿刺椎体成形术
103	D14(脊柱)	2020-05-04	2020-05-23	2980598	叶陈蜜	女	72Y	腰椎间盘突出	腰椎椎管狭窄;下肢动脉粥样硬化;后天性肾囊肿;多发性肋骨骨折;下肢静脉血栓形成;冠状动脉粥样硬化性心脏病;甲状腺囊肿;躯干部血管瘤	治愈	黄其杉	黄其杉	窦海成	后入路腰椎间盘切除术;腰椎椎板切除减压术;椎弓根钉内固定术;后入路腰椎融合术
104	D14(脊柱)	2020-05-26	2020-06-08	2985938	刘玉莲	女	77Y	骨质疏松伴病理性骨折	特指手术后状态;高血压病;原发性双侧膝关节病;胸椎骨折;脂肪肝;下肢静脉血栓形成;糖尿病	好转	黄其杉	黄其杉	窦海成	经皮穿刺椎体成形术
105	D14(脊柱)	2020-03-22	2020-07-06	2995017	张发安	男	47Y	颈椎骨折	后纵韧带骨化;前列腺结石;泌尿道感染;脂肪肝;下肢静脉血栓形成;肺栓塞;下肢深静脉血栓性静脉炎;颈部脊髓损伤;髌骨骨折	治愈	倪文飞	倪文飞	盛孙仁	前入路颈椎间盘切除术;前入路颈椎融合术;椎体部分切除术;颈椎植骨术;髌骨骨折切开复位螺钉内固定术
106	D14(脊柱)	2020-08-12	2020-08-18	3009413	毛冬娥	女	63Y	骨质疏松伴病理性骨折	下肢深静脉血栓性静脉炎	治愈	黄其杉	王胜	王胜	胸椎骨折球囊扩张成形术
107	D14(脊柱)	2020-09-05	2020-09-12	3017647	季冰芒	男	84Y	多发性腰椎骨折	腰椎间盘突出;多发性胸椎骨折;骨质疏松;下肢静脉血栓形成	治愈	黄其杉	黄其杉	窦海成	腰椎骨折球囊扩张成形术;胸椎骨折球囊扩张成形术
108	D14(脊柱)	2020-10-25	2020-11-08	3036053	闻碎香	女	84Y	腰椎骨折	肱骨上端骨折;胆总管扩张;胸腔积液;下肢静脉血栓形成;骨质疏松	好转	徐晖	徐晖	徐晖	腰椎骨折球囊扩张成形术;肱骨骨折切开复位钢板内固定术
109	D14(脊柱)	2020-12-01	2020-12-12	3047561	胡银山	男	79Y	腰椎骨折	陈旧性腰椎骨折;骨质疏松;慢性阻塞性肺病;低钾血症;陈旧性肺结核;肝囊肿;下肢动脉粥样硬化;下肢深静脉血栓性静脉炎;肺大泡	治愈	徐晖	徐晖	覃燕青	腰椎骨折球囊扩张成形术
110	D14(脊柱)	2020-12-09	2020-12-15	3048685	李黄菊	女	67Y	腰椎骨折	骨质疏松;泌尿道感染;下肢深静脉血栓性静脉炎;后天性肾囊肿;帕金森病	治愈	徐晖	徐晖	覃燕青	腰椎骨折球囊扩张成形术
111	D15颈椎外科、腰椎外科	2020-01-09	2020-01-18	2941988	陈祥媚	女	77Y	胸椎骨折	静脉栓塞和血栓形成;脂肪肝;肺部感染;下肢动脉粥样硬化;肾结石;骨质疏松伴病理性骨折	治愈	林焱	林焱	林仲可	胸椎骨折球囊扩张成形术
112	D15颈椎外科、腰椎外科	2020-01-09	2020-01-22	2943207	冯美美	女	65Y	胫腓骨下端骨折	下肢动脉粥样硬化;高血压病;静脉栓塞和血栓形成	治愈	陈华	陈华	余贤斌	腓骨骨折切开复位钢板内固定术;踝关节骨折闭合复位螺钉内固定术
113	D15颈椎外科、腰椎外科	2020-01-28	2020-02-05	2948283	黄银玲	女	62Y	腰椎骨折	静脉栓塞和血栓形成;帕金森病	治愈	王向阳	武垚森	武垚森	腰椎骨折球囊扩张成形术
114	D15颈椎外科、腰椎外科	2020-02-10	2020-02-20	2951828	吴锡麟	男	82Y	胸椎骨折	高血压病;静脉栓塞和血栓形成;骨质疏松	治愈	王向阳	王向阳	林仲可	胸椎骨折球囊扩张成形术
115	D15颈椎外科、腰椎外科	2020-02-15	2020-02-22	2952180	吴丽娟	女	79Y	胸椎骨折	静脉栓塞和血栓形成;骨质疏松	治愈	王向阳	王向阳	林仲可	腰椎骨折球囊扩张成形术
116	D15颈椎外科、腰椎外科	2020-03-07	2020-03-15	2959354	林宪玫	女	70Y	腰椎骨折	脂肪肝;肝囊肿;高血压病;骨质疏松;单纯性肾囊肿;静脉栓塞和血栓形成	治愈	王向阳	王向阳	林仲可	腰椎骨折球囊扩张成形术
117	D15颈椎外科、腰椎外科	2020-05-01	2020-05-10	2976653	黄娒丁	女	64Y	腰椎骨折	胸腔积液;下肢静脉血栓形成;甲状腺结节	治愈	毛方敏	毛方敏	田乃锋	腰椎骨折球囊扩张成形术
118	D15颈椎外科、腰椎外科	2020-05-23	2020-06-02	2984109	谢荣连	男	55Y	颈部脊髓损伤	特指手术后状态;下肢动脉粥样硬化;多处挫伤;跖骨骨折;前列腺结石;脂肪肝;下肢静脉血栓形成	治愈	林焱	林焱	金海东	前入路颈椎间盘切除术;颈椎植骨术;颈椎脱位切开复位内固定术
119	D15颈椎外科、腰椎外科	2020-06-14	2020-06-27	2992003	谢志港	男	49Y	多发性颈椎骨折	颈椎滑脱;桡骨下端骨折;硬膜外血肿;多处挫伤;创伤性脑血肿;颈椎脱位;肋骨骨折;下肢静脉血栓形成;特指手术后状态;混合型颈椎病	治愈	林焱	林焱	金海东	前入路颈椎间盘切除术;椎弓根钉内固定术;颈椎脱位切开复位内固定术
120	D15颈椎外科、腰椎外科	2020-07-22	2020-08-08	3005785	陈秋兰	女	71Y	多发性胸椎骨折	腕和手水平特指肌肉和肌腱损伤;下肢动脉粥样硬化;腰椎滑脱;糖尿病;脂肪肝;下肢静脉血栓形成;高血压病	治愈	林焱	林焱	林焱	胸椎骨折球囊扩张成形术
121	D15颈椎外科、腰椎外科	2020-08-10	2020-08-19	3010002	吴明畴	男	78Y	腰椎骨折	下肢动脉硬化闭塞症;下肢动脉粥样硬化;高血压病;单纯性肾囊肿;下肢静脉血栓形成;胆囊息肉;肾结石	治愈	王向阳	王向阳	王向阳	腰椎骨折球囊扩张成形术
122	D15颈椎外科、腰椎外科	2020-09-21	2020-10-01	3024094	张美翠	女	79Y	腰椎骨折	骨质疏松伴病理性骨折;下肢动脉粥样硬化;下肢静脉血栓形成	治愈	林焱	林焱	林焱	腰椎骨折球囊扩张成形术
123	D15颈椎外科、腰椎外科	2020-09-26	2020-10-17	3028368	管兰双	女	63Y	多发性腰椎骨折	眶骨骨折;腰椎间盘突出;肩回旋套肌腱损伤;下肢静脉血栓形成;高血压病;腔隙性脑梗死;单纯性肾囊肿;头皮挫伤;头皮血肿;锁骨骨折;多发性肋骨骨折	治愈	毛方敏	毛方敏	毛方敏	椎弓根钉内固定术
124	D15颈椎外科、腰椎外科	2020-09-19	2020-10-17	3028644	金文波	男	71Y	多发性腰椎骨折	胸腔积液;下肢静脉血栓形成;糖尿病;特指手术后状态;蛛网膜下腔出血;肩胛骨骨折;脑挫伤;多发性肋骨骨折;肺挫伤	治愈	林焱	田乃锋	田乃锋	下腔静脉滤器置入术;股静脉穿刺术;椎管减压术;椎弓根钉内固定术;后入路腰椎融合术
125	D15颈椎外科、腰椎外科	2020-11-05	2020-11-15	3038617	郑加波	男	88Y	腰椎骨折	特指椎间盘移位;下肢动脉粥样硬化;高血压病;下肢静脉血栓形成	治愈	王向阳	盛孙仁	盛孙仁	腰椎骨折球囊扩张成形术
126	D15颈椎外科、腰椎外科	2020-11-15	2020-11-29	3043281	马家义	男	53Y	胸椎骨折	高血压病;蛛网膜囊肿;脂肪肝;下肢静脉血栓形成	治愈	王向阳	盛孙仁	盛孙仁	椎弓根钉内固定术
127	D15颈椎外科、腰椎外科	2020-11-18	2020-12-08	3046399	胡林菊	女	73Y	胸椎骨折	下肢静脉血栓形成;骨质疏松;腰椎滑脱	治愈	林焱	林焱	林焱	胸椎骨折球囊扩张成形术
128	D15颈椎外科、腰椎外科	2020-11-22	2020-12-09	3046901	林津津	女	71Y	胸椎骨折	带状疱疹;高血压病;下肢静脉血栓形成;颈椎间盘突出;脱髓鞘性脊髓炎;骨质疏松伴病理性骨折	治愈	林焱	林焱	林焱	胸椎椎板切除减压术;椎弓根钉内固定术
129	D15颈椎外科、腰椎外科	2020-12-09	2020-12-21	3050768	王凤柳	女	81Y	腰椎骨折	骨质疏松;腰椎滑脱;下肢静脉血栓形成;胆囊结石	治愈	毛方敏	毛方敏	毛方敏	腰椎骨折球囊扩张成形术;股静脉穿刺术;下腔静脉滤器置入术
130	D15颈椎外科、腰椎外科	2020-12-12	2020-12-30	3053664	杨定莲	女	77Y	胸椎骨折	骨质疏松伴病理性骨折;桡骨下端骨折;高血压病;糖尿病;心脏病;下肢静脉血栓形成	治愈	林焱	林焱	林焱	胸椎骨折球囊扩张成形术
131	F02急诊创伤	2020-01-18	2020-01-27	2945073	潘金堂	男	70Y	骨盆骨折	创伤性胸腔积液;多发性肋骨骨折;下肢深静脉血栓性静脉炎;胸部损伤;皮肤挫伤;多处挫伤;肺挫伤;耻骨骨折;腰椎骨折	好转	陈大庆	朱烈烈	罗俊君
132	F02急诊创伤	2020-07-06	2020-08-04	3004746	陈章伦	男	67Y	创伤性蛛网膜下腔出血	下肢静脉血栓形成;下颌骨骨折;视神经损伤;皮肤挫伤;跖骨骨折;腓骨骨折;耻骨骨折;创伤性颅内出血	好转	林露阳	项洪武	项洪武	视神经减压术;鼻内窥镜检查
133	F03观察病房	2020-03-29	2020-04-15	2968825	陈光林	男	85Y	头部外伤	颈椎半脱位;腓骨干骨折;椎间盘变性;胸腔积液;下肢静脉血栓形成;颈椎间盘突出;胸椎楔形变;高血压病;额部血肿;下肢深静脉血栓性静脉炎;中度贫血;陈旧性肋骨骨折	好转	林露阳	项洪武	项洪武	下腔静脉滤器置入术;股静脉穿刺术
134	F03观察病房	2020-04-07	2020-04-20	2970345	张锦萍	女	54Y	良性阵发性眩晕	高血压病;肾结石;阻塞性睡眠呼吸暂停综合征;脊髓灰质炎后遗症;急性上呼吸道感染;腰椎骨折;脂肪肝;下肢静脉血栓形成;甲状腺结节	好转	孙来芳	齐艳红	齐艳红
135	F04脑外	2020-01-10	2020-02-16	2950386	邓其希	男	20Y	脑挫伤	开放性颅内异物;头皮裂伤;上矢状窦非脓性血栓形成;创伤性蛛网膜下腔出血;顶骨骨折	好转	林坚	盛汉松	林逢春	大脑清创术;脑内异物取出术
136	F04脑外	2020-06-06	2020-07-22	3000481	孙德彩	男	62Y	创伤性蛛网膜下腔出血	枕骨骨折;下肢静脉血栓形成;中耳炎;单纯性肾囊肿;肾结石;头皮血肿;脑挫伤	好转	张弩	张弩	许尚虞	下腔静脉滤器置入术;股静脉穿刺术
137	F04脑外	2020-07-05	2020-09-12	3017830	王德焕	男	69Y	创伤性硬膜下出血	下肢动脉粥样硬化;后天性肾囊肿;多发性肋骨骨折;开放性背部损伤;头皮裂伤;下肢静脉血栓形成;创伤性气胸;脑挫伤;髌骨骨折;肩胛骨骨折;肺挫伤	好转	张弩	周辉	尹波	肩胛骨骨折切开复位钢板内固定术
138	F05脑外	2020-12-18	2020-12-30	3053948	陈春梅	女	79Y	创伤性硬膜下出血	脑挫伤;创伤性蛛网膜下腔出血;头皮血肿;胸腔积液;锁骨骨折;肋骨骨折;心房颤动;下肢静脉血栓形成;脂肪肝;单纯性肾囊肿;肾结石	好转	张弩	周辉	尹波
139	F06(急ICU)	2020-11-23	2020-11-26	3042347	徐顺浪	男	84Y	创伤性蛛网膜下腔出血	高血压病;二尖瓣及主动脉瓣关闭不全;寰枢椎半脱位;第二颈椎骨折;后天性肾囊肿;包裹性胸腔积液;下肢特指深部脉管静脉炎和血栓性静脉炎;肺部感染;下肢静脉血栓形成	未愈	孙来芳	孙来芳	曾霜
140	H07骨科综合病区	2015-12-24	2020-01-04	2937831	秦立蝶	女	79Y	股骨粗隆间骨折	下肢动脉粥样硬化;下肢血栓性静脉炎	治愈	郭晓山	吴剑彬	吴剑彬	股骨骨折闭合复位髓内针内固定术
141	H07骨科综合病区	2015-12-24	2020-01-11	2939799	黄长娟	女	90Y	股骨粗隆间骨折	下肢血栓性静脉炎;下肢动脉粥样硬化	治愈	郭晓山	吴剑彬	吴剑彬	下腔静脉滤器置入术;股骨骨折闭合复位髓内针内固定术
142	H07骨科综合病区	2020-01-27	2020-02-06	2948928	刘青青	女	64Y	股骨粗隆间骨折	下肢血栓性静脉炎	治愈	郭晓山	吴剑彬	吴剑彬	股骨骨折闭合复位髓内针内固定术
143	H07骨科综合病区	2020-08-03	2020-08-11	3007062	潘绍来	男	56Y	双踝骨折	特指手术后状态;肺炎;下肢深静脉血栓性静脉炎;踝和足浅表损伤	治愈	汤骏	汤骏	冯永增	踝关节骨折切开复位螺钉内固定术
144	H07骨科综合病区	2020-08-23	2020-09-12	3017698	李祖局	男	62Y	胫骨上端骨折	髋挫伤;椎间盘膨隆;颈椎间盘突出;膝关节十字韧带扭伤;膝关节副韧带扭伤;闭合性胫骨平台骨折;膝关节积液;下肢深静脉血栓性静脉炎;膝挫伤;肝囊肿	治愈	潘孝云	杨阳	许心弦	胫骨骨折闭合复位螺钉内固定术;膝关节镜下后十字韧带重建术;副韧带修补术;下肢静脉造影
145	H07骨科综合病区	2020-11-27	2020-12-02	3044341	金彩妹	女	91Y	股骨粗隆间骨折	偏瘫;脑卒中后遗症;脂肪肝;下肢动脉粥样硬化;下肢深静脉血栓性静脉炎	好转	陈龙	陈龙	应晓洲
146	H09胃肠外科	2015-11-24	2020-01-15	2941092	陈罗花	女	48Y	腓骨骨折	头部外伤;皮肤挫伤;多处挫伤;肺挫伤;胸骨骨折;膝关节副韧带扭伤;闭合性胫骨平台骨折;半月板损伤;创伤性胸腔积液;多发性肋骨骨折;下肢深静脉血栓性静脉炎	治愈	倪孔海	徐晓武	徐晓武	股静脉穿刺术;下腔静脉滤器置入术
147	H10肝胆外科	2020-11-01	2020-11-28	3042646	王学吉	男	76Y	血栓闭塞性血管炎	肩关节关节病;陈旧性股骨粗隆间骨折;心包积液	治愈	陈龙	陈龙	应晓洲	经胫骨和腓骨的小腿截断术
148	H11颈部外科	2020-09-05	2020-09-14	3018314	梁玉昌	男	82Y	股骨颈骨折	前列腺结石;前列腺增生;肝囊肿;下肢静脉血栓形成	好转	孔建中	孔建中	陈墨川	人工股骨头置换术
149	H13内分泌血管外科	2020-02-18	2020-02-21	2951949	叶祥松	男	50Y	下肢深静脉血栓性静脉炎	骨折治疗后恢复期;髌骨骨折;股骨骨折;肺气肿;陈旧性肺结核	好转	邓超频	艾鹏	潘浩	下肢静脉造影
150	H13内分泌血管外科	2020-02-15	2020-03-01	2954773	全银媛	女	78Y	大隐静脉曲张	单侧腹股沟直疝伴坏疽;髂静脉压迫综合征;下肢静脉炎和血栓性静脉炎;腰椎骨折;腰椎退行性病变;腰椎间盘突出;骨质疏松	治愈	邓超频	陈聪	潘浩	大隐静脉高位结扎剥脱术;经皮椎动脉球囊扩张血管成形术
151	H13内分泌血管外科	2020-02-26	2020-03-11	2958147	张荣花	女	78Y	2型糖尿病	颈动脉硬化;高血压病;足皮肤感染;老年性脑萎缩;下肢静脉炎和血栓性静脉炎;腔隙性脑梗死;主动脉钙化;脊髓灰质炎后遗症;肋骨骨折;肺部阴影;肝囊肿;脂肪肝	好转	潘优津	潘优津	吴笑英
152	H13内分泌血管外科	2020-04-13	2020-04-22	2970876	陈昌平	男	47Y	下肢深静脉血栓性静脉炎	特指手术后状态;膀胱造口状态;陈旧性骨盆骨折;胸腔积液;肺栓塞	治愈	邓超频	陈聪	陈魁	下肢静脉造影;股静脉穿刺术;下腔静脉滤器置入术
153	H13内分泌血管外科	2020-04-15	2020-04-22	2970886	叶仙弟	女	69Y	下肢深静脉血栓性静脉炎	病理性骨折;骨质疏松;脂肪肝	未愈	邓超频	陈聪	潘浩
154	H13内分泌血管外科	2020-10-30	2020-11-07	3035418	金先光	男	52Y	肠系膜静脉血栓形成	胸椎骨折;前列腺增生;大隐静脉曲张;门静脉血栓形成	好转	邓超频	陈聪	陈魁
155	H13内分泌血管外科	2020-12-02	2020-12-05	3045234	陈春娥	女	80Y	下肢深静脉血栓性静脉炎	高血压病;青光眼;股骨粗隆间骨折	好转	邓超频	陈聪	潘浩	下腔静脉滤器置入术;股静脉穿刺术
156	H15消化内科	2020-05-27	2020-06-07	2985563	郭和平	男	62Y	肠系膜动脉血栓形成	动脉粥样硬化;锁骨下动脉粥样硬化;下肢动脉粥样硬化;陈旧性肋骨骨折;肝囊肿;锁骨下动脉狭窄;冠状动脉粥样硬化	好转	林李淼	申苏建	申苏建
157	H15消化内科	2020-07-18	2020-08-27	3012357	王春尾	女	81Y	胆囊结石伴慢性胆囊炎	肾结石;多发性肋骨骨折;2型糖尿病;头皮血肿;肺挫伤;肩胛骨骨折;耻骨骨折;胆汁淤积症;肺部感染;胸腔积液;下肢静脉血栓形成;高血压病	好转	郑君杰	蔡振寨	申苏建
158	K02康复	2020-05-13	2020-07-06	2994752	黄瑞贤	男	63Y	骨盆骨折	抑郁状态;多发性肋骨骨折;髂骨骨折;耻骨骨折;骶骨骨折;肩袖损伤;腹水;肺部感染;胸腔积液;下肢静脉血栓形成;贫血;多发性颅骨骨折	好转	蒋松鹤	郑余银	陈文斯
159	K06康复	2015-12-15	2020-01-12	2940274	董李飘	男	62Y	脊髓损伤	神经源性膀胱;神经源性肠;基底节脑梗死;骨折治疗后恢复期;下肢动脉栓塞和血栓形成;四肢瘫痪	好转	蒋松鹤	卢君艳	卢君艳
160	K06康复	2020-01-12	2020-01-29	2945877	董李飘	男	62Y	脊髓损伤	神经源性膀胱;神经源性肠;不完全截瘫;骨折治疗后随诊检查;下肢深静脉血栓性静脉炎;腔隙性脑梗死;颅骨肿瘤	好转	蒋松鹤	卢君艳	卢君艳
161	K06康复	2020-02-29	2020-03-30	2963800	蔡思彪	男	49Y	脊髓损伤	肾结石;下肢静脉血栓形成;泌尿道感染;单纯性肾囊肿;颈椎间盘疾患;高血压病;陈旧性颈椎骨折	好转	蒋松鹤	卢君艳	邹恩苗
162	K06康复	2020-02-25	2020-04-06	2965869	潘国新	男	35Y	脊髓损伤	特指手术后状态;骨折治疗后恢复期;肺部感染;下肢血栓性静脉炎;指骨骨折	好转	蒋松鹤	郑余银	程博
163	K06康复	2020-04-29	2020-06-22	2990381	陈孙田	男	48Y	颈部脊髓损伤	特指手术后状态;下肢静脉血栓形成;肺部感染;脂肪肝;泌尿道感染;神经源性膀胱;肋骨骨折;肺挫伤;创伤性截瘫;神经源性肠;颈椎关节强硬	好转	蒋松鹤	郑余银	高丽萍
164	K06康复	2020-04-06	2020-07-07	2995014	潘国新	男	35Y	颈部脊髓损伤	泌尿道感染;高尿酸血症;指骨骨折;创伤性截瘫;神经源性肠;神经源性膀胱;下肢静脉血栓形成	好转	蒋松鹤	郑余银	程博
165	K06康复	2020-05-30	2020-09-20	3020099	刘际轮	男	61Y	颈部脊髓损伤	神经源性膀胱;神经源性肠;四肢瘫痪;胸腔积液;下腔静脉血栓形成;泌尿道感染;肺部感染;多发性肋骨骨折	好转	蒋松鹤	郑余银	程博
166	K06康复	2020-09-12	2020-09-26	3022203	李祖局	男	62Y	膝关节僵硬	颈椎间盘突出;多发性膝关节损伤;膝关节十字韧带扭伤;膝关节副韧带扭伤;闭合性胫骨平台骨折;半月板损伤;膝关节积液;下肢特指深部脉管静脉炎和血栓性静脉炎;轻度贫血	好转	蒋松鹤	郑余银	陈文斯
167	K06康复	2020-07-05	2020-10-11	3026629	余爱彩	女	58Y	颈部脊髓损伤	腓骨骨折;高血压病;特指关节特指关节炎;高脂血症;颈动脉硬化;陈旧性胸椎骨折;特指腕骨骨折;下肢静脉血栓形成;原发性双侧膝关节病	好转	郑余银	郑余银	程博
168	K06康复	2020-04-26	2020-10-14	3027647	吴秀文	女	59Y	肩关节脱位	臂丛神经损伤;静脉栓塞和血栓形成;肱骨上端骨折;闭合性胫骨平台骨折;腓骨骨折;糖尿病	好转	蒋松鹤	郑余银	陈文斯	膝关节半月板成形术;肩关节脱位闭合复位术;胫骨骨折切开复位钢板内固定术
169	K06康复	2020-10-17	2020-12-23	3051569	金文波	男	71Y	脊髓损伤	创伤性胸腔积液;下肢深静脉血栓性静脉炎;2型糖尿病;褥疮;骨折治疗后恢复期;肺挫伤;脑挫伤;多发性肋骨骨折;肩胛骨骨折;特指手术后状态;神经源性膀胱;创伤性截瘫;颞骨骨折	好转	蒋松鹤	卢君艳	程博
170	N14心血管内科	2020-03-10	2020-03-22	2961597	翁米英	女	77Y	肺栓塞	下肢动脉粥样硬化;单纯性肾囊肿;下肢静脉炎和血栓性静脉炎;肋骨骨折;肺部感染	好转	季亢挺	季亢挺	宋喜发	股静脉穿刺术;下腔静脉滤器置入术
171	N16心血管内科	2020-12-15	2020-12-31	3054026	陈花妹	女	77Y	冠状动脉粥样硬化性心脏病	高血压病;动脉粥样硬化;骨折治疗后恢复期;高血压性心脏病;颈动脉硬化;下肢动脉粥样硬化;下肢静脉血栓形成	好转	季亢挺	宋喜发	殷日鹏
首页	尾页
骨折+肺栓塞
序号	出院科室	入院日期	出院日期	病案号	病人	性别	年龄	主诊断	非主诊断	转归	主任	主治	住院	手术
					姓名					情况	医师	医师	医师	名称
1	D09(创伤1)	2020-07-14	2020-08-10	3006540	潘德木	男	56Y	胫骨上端骨折	特指手术后状态;特指趾骨骨折;尺骨下端骨折;多处挫伤;肺部感染;肺栓塞;下肢静脉血栓形成;胸腔积液;肋骨骨折	治愈	赵友明	赵友明	赵友明	胫骨骨折切开复位螺钉内固定术
2	D14(脊柱)	2020-03-22	2020-07-06	2995017	张发安	男	47Y	颈椎骨折	后纵韧带骨化;前列腺结石;泌尿道感染;脂肪肝;下肢静脉血栓形成;肺栓塞;下肢深静脉血栓性静脉炎;颈部脊髓损伤;髌骨骨折	治愈	倪文飞	倪文飞	盛孙仁	前入路颈椎间盘切除术;前入路颈椎融合术;椎体部分切除术;颈椎植骨术;髌骨骨折切开复位螺钉内固定术
3	D15颈椎外科、腰椎外科	2020-02-19	2020-02-27	2953861	庄秀娥	女	73Y	脊柱肿瘤	全身性广泛继发恶性肿瘤;胸椎骨折;高血压病;肺栓塞;呼吸衰竭;心房颤动	好转	毛方敏	毛方敏	田乃锋
4	D15颈椎外科、腰椎外科	2020-10-06	2020-11-07	3035630	林奶孙	女	72Y	胸椎恶性肿瘤	下肢动脉粥样硬化;多发性肝囊肿;后天性肾囊肿;胸部脊髓损伤;特指手术后状态;病理性骨折;肺栓塞;骨继发恶性肿瘤	好转	王向阳	盛孙仁	盛孙仁	胸椎病损切除术
5	F03观察病房	2020-07-25	2020-08-15	3008447	章金汉	男	63Y	肺栓塞	高血压病;2型糖尿病;陈旧性股骨颈骨折;前列腺增生;特指手术后状态;麻痹性肠梗阻;肺部感染;老年性痴呆;消化道出血	好转	孙来芳	王征	王征
6	G03神经内科	2020-01-29	2020-02-16	2950451	胡凤娟	女	80Y	肺栓塞	动脉粥样硬化;颈动脉硬化;锁骨下动脉粥样硬化;多发性骨折;尺骨茎突骨折;糖尿病;肋骨骨折;泌尿道感染;肺部感染;体位性低血压;桡骨下端骨折	好转	陈松芳	陈松芳	陈松芳
7	H13内分泌血管外科	2020-04-13	2020-04-22	2970876	陈昌平	男	47Y	下肢深静脉血栓性静脉炎	特指手术后状态;膀胱造口状态;陈旧性骨盆骨折;胸腔积液;肺栓塞	治愈	邓超频	陈聪	陈魁	下肢静脉造影;股静脉穿刺术;下腔静脉滤器置入术
8	H14呼吸内科	2020-02-16	2020-02-26	2953396	胡凤娟	女	80Y	肺栓塞	颈动脉硬化;锁骨下动脉粥样硬化;下肢动脉粥样硬化;主动脉粥样硬化;干燥综合征;尺骨茎突骨折;桡骨下端骨折;慢性阻塞性肺病;2型糖尿病;房性早搏;肋骨骨折;肺部阴影;肺部感染;体位性低血压;冠状动脉粥样硬化;心绞痛	治愈	何剑波	徐慧	章国棉
9	N14心血管内科	2020-03-10	2020-03-22	2961597	翁米英	女	77Y	肺栓塞	下肢动脉粥样硬化;单纯性肾囊肿;下肢静脉炎和血栓性静脉炎;肋骨骨折;肺部感染	好转	季亢挺	季亢挺	宋喜发	股静脉穿刺术;下腔静脉滤器置入术
首页	尾页
