# Supplementary material for: Variable Rate of D-dimer Predicts Venous Thromboembolism in Postoperative Fracture Patients: A Single-Center Retrospective Cohort Study
Source: Research Square preprint supplement (doi:10.21203/rs.3.rs-7878480/v1), 2025-12-09
Supplement: Supplementary file 11 [file dfc375ba212aa1a8685663f1.xlsx]

## Sheet: Sheet1
序号	出院科室	入院日期	出院日期	病案号	病人	性别	年龄	主诊断	非主诊断	转归	主任	主治	住院	手术
					姓名					情况	医师	医师	医师	名称
14001	O209手外科	2024-10-02	2024-10-10	3553851	杨陈吉	2	63Y	在前臂水平的静脉损伤	在前臂水平的多处肌肉和肌腱损伤;在腕和手水平的多处伸肌和肌腱损伤;开放性尺骨桡骨骨折;前臂桡神经损伤;上肢皮肤裂伤;脂肪肝;高血压;2型糖尿病;肺的其他疾患	治愈	蒋良福	王安远	罗祖程	头静脉缝合术;伸指肌腱缝合术;屈腕肌腱缝合术;尺骨骨折切开复位钢板内固定术;皮肤缝合术;上肢肌伸腕功能重建伴肌移位术;上肢植皮术
14002	O209手外科	2024-09-27	2024-10-12	3554495	吴从兵	1	44Y	在腕和手水平的多处伸肌和肌腱损伤	上肢皮肤裂伤;陈旧性肋骨骨折;甲状腺结节;肝囊肿	治愈	蒋良福	王安远	罗祖程	拇长伸肌腱缝合术;上肢肌腱缝合术;上肢动脉探查术;手带蒂皮瓣移植术
14003	O209手外科	2024-09-08	2024-10-12	3554512	王孔连	1	57Y	三踝骨折	胫骨骨髓炎	治愈	陈星隆	李士	蔡海丰	胫骨病损切除术;踝关节骨折切开复位螺钉内固定术;皮肤和皮下坏死组织切除清创术;胫骨病损切除术;中厚皮片移植术;皮肤和皮下坏死组织切除清创术;创面封闭式负压引流术（VSD);创面封闭式负压引流术（VSD);软组织切开异物取出术;创面封闭式负压引流术（VSD)
14004	O209手外科	2024-10-07	2024-10-12	3554527	陈哲昊	1	16Y	锁骨骨折		治愈	陈星隆	李士	蔡海丰	锁骨骨折切开复位钢板内固定术
14005	O209手外科	2024-10-03	2024-10-13	3554879	苏月妃	2	38Y	尺骨桡骨闭合性骨折	肺肿物	治愈	陈星隆	李士	蔡海丰	桡骨骨折切开复位钢板内固定术;桡神经探查术
14006	O209手外科	2024-10-02	2024-10-13	3554881	蓝文彬	1	31Y	在前臂水平的尺动脉损伤	在前臂水平的多神经损伤;在前臂水平的尺神经损伤;在前臂水平的正中神经损伤;在前臂水平的静脉损伤;在前臂水平的多处肌肉和肌腱损伤;肝回声不均;肾结石;炎症后肺纤维化;脂肪肝;尺骨骨折	治愈	蒋良福	王安远	罗祖程	尺动脉吻合术;正中神经吻合术;尺神经吻合术;皮瓣修整术;上肢肌腱缝合术;上肢肌肉缝合术
14007	O209手外科	2024-10-08	2024-10-13	3554893	陈李云	2	47Y	尺骨鹰嘴骨折	脂肪肝;特发性肺纤维化;甲状腺术后	治愈	陈星隆	李士	蔡海丰	尺骨骨折切开复位钢板内固定术;关节软骨修复术
14008	O209手外科	2025-08-02	2024-10-14	3555309	李开秀	2	49Y	创伤性拇指动脉破裂	创伤性指动脉破裂;腕和手多处神经损伤;腕骨多发性骨折;开放性多发性掌骨骨折;下尺桡关节脱位;在腕和手水平的多处屈肌和肌腱损伤;手部尺神经损伤;上肢皮肤裂伤;腕关节扭伤;肺肿物;乙型肝炎小三阳;掌骨多处骨折;手部正中神经损伤;尺骨茎突骨折伴桡骨远端骨折	治愈	陈星隆	李士	蔡海丰	桡骨骨折切开复位钢板内固定术;皮肤和皮下坏死组织切除清创术;动脉缝合术;屈指肌腱缝合术;正中神经缝合术;尺神经缝合术;腕关节成形术;指皮肤游离移植术;皮瓣修整术;指关节囊缝合术;掌骨骨折切开复位螺钉内固定术;掌腕关节固定术;肌腱、血管、神经探查术
14009	O209手外科	2024-10-05	2024-10-14	3555346	陈际爱	2	61Y	尺骨茎突骨折伴桡骨远端骨折	2型糖尿病;脂肪肝;胆囊结石;肝囊肿	治愈	蒋宾	李志杰	徐海艇	桡骨骨折切开复位钢板内固定术;尺骨骨折切开复位钢针内固定术;关节软骨修复术;前臂肌腱缝合术
14010	O209手外科	2024-09-23	2024-10-15	3555919	陈时道	1	57Y	手术后切口感染	开放性胫腓骨干骨折;高脂血症;酒精性肝硬化;胆囊结石;心律失常;2型糖尿病	治愈	宋永焕	李晓阳	史吏	下肢植皮术;皮肤和皮下坏死组织切除清创术;皮肤和皮下坏死组织切除清创术;创面封闭式负压引流术（VSD)
14011	O209手外科	2024-10-11	2024-10-15	3555930	朱若翰	1	28Y	取除骨折内固定装置	股骨髁上骨折;肺肿物	其他	陈龙	陈龙	白炳力	股骨内固定装置去除术;皮肤瘢痕切除术
14012	O209手外科	2024-10-13	2024-10-15	3555959	郭廷学	1	90Y	颈部脊髓损伤	颈椎骨折C6;颈椎滑脱	未愈	林焱	许聪	许聪
14013	O209手外科	2024-10-12	2024-10-16	3556158	杨秀芬	2	62Y	手部拇指伸肌腱损伤	桡骨远端骨折;陈旧性尺桡骨骨折;肺肿物;炎症后肺纤维化;心包积液;主动脉钙化;肝囊肿;下肢静脉血栓形成;左室扩大;升主动脉扩张;室间隔肥大;退行性主动脉瓣疾患;心功能不全;主动脉(瓣)关闭不全	治愈	蒋良福	王安远	罗祖程	上肢肌伸肘功能重建伴肌移位术
14014	O209手外科	2024-10-12	2024-10-16	3556245	朱俊杰	1	25Y	指间关节韧带断裂	指间关节脱位;手指骨折，其他的;指关节扭伤	治愈	宋永焕	李晓阳	史吏	指间关节侧副韧带缝合术;关节软骨修复术;指关节囊缝合术;骨碎片去除术
14015	O209手外科	2024-10-12	2024-10-17	3556644	张洪芬	2	46Y	指神经损伤	指间关节脱位;开放性拇指骨折;腕和手指内在肌和肌腱损伤	治愈	虞庆	虞庆	朱旭伟	指神经缝合术;指骨骨折切开复位钢针内固定术;指关节脱位切开复位术;指间关节侧副韧带缝合术;手部肌腱止点重建术;皮肤和皮下组织的其他修补术和重建术
14016	O209手外科	2024-10-04	2024-10-17	3556651	张光明	1	56Y	足多处骨折	拇趾骨折;趾骨骨折，其他的;趾开放性伤口伴有趾甲损坏;趾神经损伤;下肢血管的损伤;趾间关节损伤;孤立性肺结节;高血压;2型糖尿病	治愈	宋永焕	李晓阳	史吏	趾骨骨折切开复位钢针内固定术;关节软骨修复术;趾关节融合术;下肢植皮术;甲床清创术
14017	O209手外科	2024-10-10	2024-10-17	3556652	唐志芬	2	50Y	桡骨远端骨折	脂肪肝;胆囊结石;肾结石	治愈	宋永焕	李晓阳	史吏	桡骨骨折切开复位钢板内固定术;关节软骨修复术;桡骨植骨术;韧带修补术
14018	O209手外科	2024-10-12	2024-10-17	3556686	王政凯	1	8Y	锁骨骨折		治愈	陈星隆	李士	蔡海丰	锁骨骨折切开复位髓内针内固定术
14019	O209手外科	2024-10-11	2024-10-17	3556783	杨明和	1	46Y	取除骨折内固定装置	跟骨骨折;肺炎，其他的,病原体未特指的	其他	王鉴顺	王鉴顺	蔡乐益	跟骨内固定物取出术
14020	O209手外科	2024-10-08	2024-10-19	3557448	徐丐友	1	68Y	手部尺动脉损伤	拇指骨折;腕和手指屈肌腱损伤;上肢皮肤裂伤;肺气肿;肺肿物;炎症后肺纤维化;肺的其他疾患;主动脉钙化;后天性肾囊肿	治愈	蒋良福	王安远	罗祖程	尺动脉吻合术;指骨骨折切开复位钢针内固定术;皮肤缝合术;屈指肌腱缝合术;指骨植骨术;骨切除术用作移植物
14021	O209手外科	2024-09-15	2024-10-19	3557526	张妹姐	2	80Y	尺骨桡骨闭合性骨折	上肢皮肤裂伤;肺肿物;炎症后肺纤维化;退行性主动脉瓣疾患;心功能不全;主动脉(瓣)关闭不全	治愈	蒋良福	王安远	罗祖程	桡骨外固定术;中厚皮片移植术;创面封闭式负压引流术（VSD);创面封闭式负压引流术（VSD);创面封闭式负压引流术（VSD);指皮肤游离移植术;手带蒂皮瓣移植术;外部固定装置应用，单相系统
14022	O209手外科	2024-10-14	2024-10-19	3557545	任颜义	1	28Y	腕舟骨脱位	手舟\[舟状\]骨骨折;肺肿物;特发性肺纤维化	治愈	陈星隆	李士	蔡海丰	腕关节脱位切开复位内固定术;上肢韧带缝合术
14023	O209手外科	2024-10-14	2024-10-20	3557775	张春丽	2	42Y	桡骨远端骨折	髌骨骨折	治愈	陈星隆	李士	蔡海丰	桡骨骨折切开复位钢板内固定术
14024	O209手外科	2024-10-14	2024-10-20	3557776	陈崇芬	2	65Y	尺骨茎突骨折伴桡骨远端骨折	肺肿物;胸膜肥厚;肋骨骨折;二尖瓣反流	治愈	蒋良福	王安远	罗祖程	桡骨骨折切开复位钢板内固定术;关节软骨修复术;石膏绷带固定
14025	O209手外科	2024-10-10	2024-10-21	3558214	李双灯	1	41Y	在腕和手水平的多血管损伤	在腕和手水平的肌肉和肌腱的损伤;在腕和手水平的多神经损伤;开放性多发性指骨骨折;手指开放性伤口伴有指甲损害	治愈	宋永焕	李晓阳	史吏	血管修补术;指神经缝合术;上肢肌腱缝合术;指骨骨折切开复位钢针内固定术;指关节囊缝合术;手肌腱滑车重建术;上肢肌伸指功能重建伴肌移位术;皮肤和皮下坏死组织切除清创术;指间关节固定术
14026	O209手外科	2024-10-16	2024-10-21	3558219	胡亦飞	1	50Y	腕和手指伸肌腱损伤	第一掌骨骨折;拇指骨折;拇掌关节脱位;掌指关节副韧带断裂;上肢皮肤裂伤;腕和手指内在肌和肌腱损伤	治愈	宋永焕	李晓阳	史吏	上肢肌伸指功能重建伴肌移位术;指骨骨折切开复位钢板内固定术;指关节病损切除术;关节软骨修复术;皮瓣修整术;指间关节侧副韧带缝合术;指关节囊缝合术
14027	O209手外科	2024-10-19	2024-10-21	3558245	范青松	2	53Y	取除骨折内固定装置	手指多处骨折;瘢痕性肌腱粘连;脂肪肝;肝囊肿;心功能不全;高血压	其他	宋永焕	李晓阳	史吏	指骨内固定装置去除术;手指肌腱松解术;指关节松解术
14028	O209手外科	2024-10-12	2024-10-22	3558656	叶建勤	2	60Y	手指骨折，其他的	指间关节脱位;上肢皮肤裂伤;高血压;手部指屈肌腱损伤;上肢韧带损伤	治愈	虞庆	虞庆	朱旭伟	指骨骨折切开复位钢针内固定术;韧带修补术;指关节脱位切开复位术;指骨人工骨植骨术
14029	O209手外科	2024-10-18	2024-10-22	3558776	翁阿红	2	69Y	胸椎多处骨折	2型糖尿病;脊椎前移;腰椎峡部裂;心功能不全;椎体海绵状血管畸形	治愈	黄其杉	田乃锋	田乃锋	胸椎骨折球囊扩张成形术
14030	O209手外科	2024-10-20	2024-10-22	3558839	孙自强	1	57Y	取除骨折内固定装置	桡骨远端骨折;乙型病毒性肝炎;心功能不全;脂肪肝;胆囊息肉;后天性肾囊肿;肾结石;前列腺结石;肺气肿合并肺大泡;肺肿物;室间隔肥大;主动脉(瓣)关闭不全;二尖瓣反流;前列腺增生	其他	陈星隆	李士	蔡海丰	桡骨内固定装置去除术;皮肤瘢痕切除术
14031	O209手外科	2024-10-20	2024-10-23	3559106	胡月亮	1	65Y	取除骨折内固定装置	桡骨远端骨折;肱骨骨折;高血压;脂肪肝	其他	陈星隆	李士	蔡海丰	桡骨内固定装置去除术
14032	O209手外科	2024-10-19	2024-10-24	3559538	苏桢晨	1	29Y	肱骨外髁骨折	脂肪肝;后天性肾囊肿;前列腺结石	治愈	蒋良福	王安远	罗祖程	肱骨骨折切开复位螺钉内固定术;肘关节固定术
14033	O209手外科	2024-10-21	2024-10-24	3559548	黄文博	1	12Y	桡骨远端骨折	肺肿物	治愈	陈星隆	李士	蔡海丰	桡骨骨折切开复位钢针内固定术
14034	O209手外科	2024-10-21	2024-10-24	3559695	卢孔云	1	56Y	胸椎骨折	腰椎骨折;腰椎间盘突出;特发性(原发性)高血压;脂肪肝;后天性肾囊肿;胃肠气胀及有关情况	好转	倪文飞	吴爱悯	吴爱悯
14035	O209手外科	2025-08-18	2024-10-26	3560020	聂梓恒	1	3Y	足部开放性损伤伴骨折	跖骨骨折;跗跖关节脱位;趾间关节损伤	治愈	陈星隆	李士	蔡海丰	下肢全厚皮片移植术;残端皮肤修整术;残端皮肤修整术;经足截断术;创面封闭式负压引流术（VSD);创面封闭式负压引流术（VSD);下肢植皮术;创面封闭式负压引流术（VSD);创面封闭式负压引流术（VSD);创面封闭式负压引流术（VSD);皮肤和皮下坏死组织切除清创术
14036	O209手外科	2024-09-12	2024-10-26	3560188	钟正浩	1	28Y	手指多处骨折	手指热挤压伤;后天性肾囊肿	治愈	陈星隆	李士	蔡海丰	指皮肤游离移植术;皮肤和皮下坏死组织切除清创术;皮肤和皮下坏死组织切除清创术;皮肤和皮下坏死组织切除清创术;创面封闭式负压引流术（VSD);创面封闭式负压引流术（VSD);创面封闭式负压引流术（VSD)
14037	O209手外科	2024-09-19	2024-10-26	3560190	刘海明	1	41Y	创伤性肱动脉损伤	前臂多处肌肉和肌腱损伤;前臂多处神经损伤;前臂多处骨折;开放性肱骨下端骨折;开放性桡骨干骨折;前臂桡动脉损伤;前臂尺动脉损伤;前臂多处血管损伤;前臂正中神经断裂;失血性休克;脂肪肝;肺肿物;肘关节脱位;前臂桡神经损伤;前臂尺神经断裂	治愈	陈星隆	李士	蔡海丰	肱动脉修补术;皮肤和皮下坏死组织切除清创术;手中厚皮片游离移植术;正中神经缝合术;桡神经缝合术;桡动脉修补术;尺神经缝合术;皮瓣修整术;前臂肌腱缝合术;前臂肌缝合术;肱骨骨折切开复位钢针内固定术;桡骨骨折切开复位钢针内固定术;创面封闭式负压引流术（VSD)
14038	O209手外科	2024-10-17	2024-10-26	3560192	谭登武	1	54Y	肱骨近端骨折	肺肿物;下肢动脉粥样硬化;脂肪肝;肾结石;前列腺增生;心功能不全	治愈	陈星隆	李士	蔡海丰	肱骨骨折切开复位钢板内固定术;关节软骨修复术
14039	O209手外科	2024-10-19	2024-10-27	3560593	张菊飞	2	53Y	手术后瘢痕	踝关节骨折;高血压;2型糖尿病;肺肿物;室间隔肥大;脂肪肝;心功能不全	治愈	陈星隆	李士	蔡海丰	皮肤瘢痕切除术;皮瓣修整术;踝关节内固定装置去除术
14040	O209手外科	2024-10-22	2024-10-27	3560600	曾鼎	1	21Y	腕和手指伸肌腱损伤	手指多处骨折;上肢皮肤裂伤	治愈	宋永焕	李晓阳	史吏	上肢肌伸指功能重建伴肌移位术;指骨骨折切开复位钢针内固定术;皮瓣修整术
14041	O209手外科	2024-10-21	2024-10-27	3560645	陈梓涵	1	14Y	髂骨骨折		治愈	张敬东	李玉安	潘天龙	髂骨骨折切开复位螺钉内固定术
14042	O209手外科	2024-10-21	2024-10-27	3560650	汤志康	1	16Y	尺骨茎突骨折伴桡骨远端骨折	肘关节脱位	治愈	陈星隆	李士	蔡海丰	尺骨骨折切开复位螺钉内固定术;肘关节固定术
14043	O209手外科	2024-10-22	2024-10-27	3560651	何光顺	1	55Y	掌骨骨折	上肢韧带损伤;腕掌关节损伤;淋巴结钙化;肺炎;脂肪肝;肺肿物;胆囊息肉;前列腺结石;心功能不全;肺钙化;下肢静脉曲张	治愈	蒋良福	王安远	罗祖程	掌骨骨折切开复位钢板内固定术;韧带修补术
14044	O209手外科	2024-10-02	2024-10-27	3560694	雷明	1	35Y	开放性双踝骨折	踝关节脱位;骰骨骨折;开放性跖骨骨折;楔状骨骨折(足);后天性肾囊肿;慢性乙型病毒性肝炎	治愈	宋永焕	李晓阳	史吏	踝关节韧带修补术;踝关节骨折切开复位钢板内固定术;踝关节病损切除术;跖骨骨折切开复位钢板内固定术;跖骨植骨术;创面封闭式负压引流术（VSD);皮肤和皮下坏死组织切除清创术;创面封闭式负压引流术（VSD);下肢植皮术;皮瓣修整术;创面封闭式负压引流术（VSD)
14045	O209手外科	2024-10-21	2024-10-27	3560915	章春凤	2	47Y	肋骨多处骨折	胆囊息肉	好转	黄俊武	胡炜	胡炜
14046	O209手外科	2024-10-20	2024-10-28	3561117	吴胜建	1	26Y	盖氏骨折	脂肪肝;肝血管瘤	治愈	陈星隆	李士	蔡海丰	桡骨骨折切开复位钢板内固定术
14047	O209手外科	2024-10-23	2024-10-28	3561119	姜福海	1	39Y	指神经损伤	开放性指骨骨折;腕和手指伸肌腱损伤;腕和手指屈肌腱损伤;手指血管损伤,其他的	治愈	闫合德	周飞亚	周飞亚	指神经缝合术;伸指肌腱缝合术;指骨骨折切开复位钢针内固定术;屈指肌腱缝合术;指间关节侧副韧带缝合术;掌板修复术
14048	O209手外科	2024-10-21	2024-10-28	3561151	李盛藉	1	26Y	尺骨鹰嘴骨折	肺肿物;肝错构瘤	治愈	陈星隆	李士	蔡海丰	尺骨骨折切开复位螺钉内固定术;关节软骨修复术
14049	O209手外科	2024-10-23	2024-10-28	3561152	章益弟	1	43Y	开放性指骨骨折	手指开放性伤口伴有指甲损害;特发性(原发性)高血压	治愈	闫合德	周飞亚	周飞亚	指骨骨折切开复位钢针内固定术;指骨植骨术;甲床清创术
14050	O209手外科	2024-10-20	2024-10-28	3561186	林荷芬	2	58Y	胸椎骨折	腰椎骨折;肱骨骨折;肋骨骨折;骨质疏松;糖尿病;脂肪肝;肾结石	治愈	林仲可	林仲可	林仲可	胸椎骨折球囊扩张成形术;腰椎骨折球囊扩张成形术;椎骨活组织检查
14051	O209手外科	2024-10-21	2024-10-29	3561536	祝永会	2	77Y	尺骨和桡骨下端均骨折	肱骨外科颈骨折;特发性肺纤维化;主动脉钙化;脂肪肝;后天性肾囊肿	治愈	陈星隆	陈一衡	蔡海丰	桡骨骨折切开复位螺钉内固定术;尺骨骨折切开复位钢针内固定术;关节软骨修复术
14052	O209手外科	2024-10-27	2024-10-29	3561538	张纪生	1	33Y	取除骨折内固定装置	尺骨和桡骨骨干均骨折;肺炎;前列腺增生;肘关节脱位;前列腺结石	其他	陈星隆	李士	蔡海丰	尺骨内固定装置去除术
14053	O209手外科	2024-10-10	2024-10-29	3561553	赵珠芬	2	55Y	在腕和手水平的多血管损伤	开放性多发性指骨骨折;在腕和手水平的多神经损伤;在腕和手水平的多处屈肌和肌腱损伤;在腕和手水平的多处伸肌和肌腱损伤;上肢皮肤裂伤;脂肪肝;肋骨良性肿瘤;脊柱侧弯	治愈	宋永焕	李晓阳	史吏	动脉修补术;指神经缝合术;指间关节固定术;腱鞘缝合术;上肢肌伸指功能重建伴肌移位术;上肢肌屈指功能重建伴肌移位术;筋膜皮瓣移植术;指骨骨折切开复位钢针内固定术;手指离断术;手带蒂皮瓣移植术
14054	O209手外科	2024-10-24	2024-10-29	3561555	应双水	1	50Y	拇指不全切断	指间关节脱位;手部指屈肌腱损伤;桡侧副韧带断裂;手部拇指伸肌腱损伤;拇指骨折;脂肪肝;后天性肾囊肿;前列腺增生;前列腺结石;拇指指神经损伤;拇指血管损伤	好转	李志杰	蒋宾	徐海艇	手指断指再植术;指关节脱位切开复位术;指骨骨折切开复位钢针内固定术;指间关节侧副韧带缝合术;指关节囊缝合术;屈指肌腱缝合术;上肢肌伸指功能重建伴肌移位术
14055	O209手外科	2024-10-26	2024-10-29	3561565	李仙英	2	67Y	取除骨折内固定装置	桡骨远端骨折;高血压;2型糖尿病;脂肪肝	其他	陈星隆	陈星隆	蔡海丰	桡骨内固定装置去除术
14056	O209手外科	2024-10-24	2024-10-29	3561574	陶延绪	1	15Y	掌骨骨折		治愈	陈星隆	陈一衡	蔡海丰	掌骨骨折闭合复位钢针内固定术
14057	O209手外科	2024-10-26	2024-10-30	3561941	蔡金花	2	45Y	桡骨远端骨折		治愈	宋永焕	李晓阳	史吏	桡骨骨折切开复位钢板内固定术;桡骨植骨术;韧带修补术
14058	O209手外科	2024-10-22	2024-10-30	3562025	谢明清	1	54Y	锁骨骨折		治愈	孙辽军	项光恒	项光恒	锁骨骨折切开复位钢板内固定术;锁骨植骨术
14059	O209手外科	2024-10-24	2024-10-30	3562052	郭彬	1	37Y	掌骨骨折	指间关节副韧带断裂;指间关节脱位;脂肪肝;心功能不全;多处损伤	治愈	宋永焕	李晓阳	史吏	掌骨骨折切开复位钢针内固定术;掌骨植骨术;上肢关节囊或韧带缝合术
14060	O209手外科	2024-10-12	2024-10-31	3558249	邹国培	1	25Y	多手指完全切断	开放性指骨骨折;在腕和手水平的多处屈肌和肌腱损伤;在腕和手水平的多神经损伤;在腕和手水平的多血管损伤;在腕和手水平的多处伸肌和肌腱损伤	好转	虞庆	虞庆	朱旭伟	手指断指再植术;指神经吻合术;血管修补术;手带蒂皮瓣移植术;指骨植骨术;上肢肌伸指功能重建伴肌移位术;上肢肌屈指功能重建伴肌移位术;甲床清创术;指骨骨折切开复位钢针内固定术
14061	O209手外科	2024-10-26	2024-10-31	3562337	曾文文	1	31Y	桡骨头骨折	尺骨冠突骨折;肘关节脱位	治愈	陈星隆	陈一衡	蔡海丰	桡骨骨折切开复位螺钉内固定术;肘关节固定术
14062	O209手外科	2024-10-26	2024-10-31	3562422	郑宣兰	2	69Y	尺骨茎突骨折伴桡骨远端骨折	腕关节脱位;高血压;肺肿物;脂肪肝;肾结石;后天性肾囊肿;心功能不全;二尖瓣反流	治愈	陈星隆	李士	蔡海丰	桡骨骨折切开复位钢板内固定术;关节软骨修复术;桡骨植骨术
14063	O209手外科	2024-10-22	2024-10-31	3562512	谷雨轩	1	13Y	胫骨结节骨折	胫骨平台骨折;髌韧带损伤	治愈	张敬东	李玉安	潘天龙	胫骨骨折切开复位螺钉内固定术;关节软骨修复术;髌韧带缝合术
14064	O209手外科	2024-10-29	2024-11-01	3562635	陈景平	1	51Y	取除骨折内固定装置		其他	陈星隆	李士	蔡海丰	胫骨内固定装置去除术
14065	O209手外科	2024-10-21	2024-11-02	3562929	黄朝辉	1	81Y	股骨颈骨折	肺恶性肿瘤;脑梗死后遗症;肺肿物;老年性心脏瓣膜病;后天性肾囊肿;前列腺增生	治愈	杨雷	应晓洲	谢忠杰	人工股骨头置换术;髋关节滑膜切除术;髋轴面，陶瓷与聚乙烯
14066	O209手外科	2024-10-24	2024-11-02	3563011	戴丁光	1	65Y	锁骨骨折	肺肿物;脂肪肝;胆囊息肉;前列腺增生;下肢动脉粥样硬化;肋骨多处骨折	治愈	陈星隆	陈星隆	蔡海丰	锁骨骨折切开复位钢针内固定术
14067	O209手外科	2024-10-22	2024-11-02	3563051	梅碎斌	1	66Y	手部指伸肌腱损伤	创伤后伤口感染;下肢动脉粥样硬化;下肢静脉肌间血栓形成;肝回声不均;膀胱纤维化;前列腺结石;左房扩大;心功能不全;肺大疱;主动脉钙化;肋骨多处骨折;肝囊肿	治愈	陈星隆	陈一衡	蔡海丰	皮肤和皮下坏死组织切除清创术;皮肤和皮下坏死组织切除清创术;手带蒂皮瓣移植术;手肌腱、血管、神经探查术;创面封闭式负压引流术（VSD);指关节囊缝合术
14068	O209手外科	2024-10-18	2024-11-02	3563075	夏明英	2	49Y	开放性第一掌骨骨折	拇指开放性损伤;上肢皮肤裂伤	治愈	闫合德	周飞亚	吴志鹏	掌骨骨折切开复位钢针内固定术;拇指截断术;中厚皮片移植术;指骨人工骨植骨术;手带蒂皮瓣移植术;创面封闭式负压引流术（VSD);皮片取皮术
14069	O209手外科	2024-09-25	2024-11-03	3563425	季敬龙	1	66Y	创伤后趾骨坏死	糖尿病;下肢静脉血栓形成;肝囊肿;胆囊息肉;后天性肾囊肿;肾结石;陈旧性肋骨骨折;孤立性肺结节	治愈	蒋良福	王安远	罗祖程	趾截断术;带蒂皮瓣修整术;跖骨内固定装置去除术
14070	O209手外科	2024-10-30	2024-11-05	3564206	郑洪松	1	82Y	腰椎骨折L4	骨质疏松;腰椎间盘突出;胸椎后凸;高血压;心脏病;脂肪肝;后天性肾囊肿;前列腺增生;前列腺结石;肾错构瘤;髋关节退行性病变;膝关节退行性病变	治愈	毛方敏	毛方敏	毛方敏	腰椎骨折球囊扩张成形术;椎骨活组织检查
14071	O209手外科	2024-11-01	2024-11-05	3564335	孙洪星	1	62Y	指神经损伤	手指开放性伤口伴有指甲损害;手指骨折，其他的;手指挤压伤;脂肪肝	治愈	陈星隆	陈一衡	蔡海丰	指神经缝合术;手带蒂皮瓣移植术;甲床清创术
14072	O209手外科	2024-11-04	2024-11-06	3564714	诸建凤	2	30Y	指间关节脱位	手指骨折，其他的	治愈	蒋良福	王安远	罗祖程	指关节脱位闭合复位术;指骨骨折闭合复位钢针内固定术
14073	O209手外科	2024-11-02	2024-11-06	3564715	张国仁	1	79Y	腓骨骨折	高血压;老年性脑萎缩	好转	蒋良福	王安远	罗祖程
14074	O209手外科	2024-10-31	2024-11-08	3565333	钱碎琴	2	36Y	双踝骨折	踝关节脱位	治愈	陈星隆	陈一衡	蔡海丰	踝关节骨折切开复位钢板内固定术;踝脱位开放性复位术
14075	O209手外科	2024-11-01	2024-11-08	3565457	常田娜	1	31Y	创伤性指动脉破裂	手指骨折，其他的;腕和手指屈肌腱损伤;指神经损伤;腕和手指伸肌腱损伤;上肢皮肤裂伤	治愈	陈星隆	李士	蔡海丰	动脉修补术;指神经缝合术;伸指肌腱缝合术;屈指肌腱缝合术;指骨骨折切开复位钢针内固定术;皮肤和皮下组织非切除性清创
14076	O209手外科	2024-11-07	2024-11-09	3565708	杨春飞	1	56Y	手指骨折，其他的		治愈	陈星隆	陈一衡	蔡海丰	指骨骨折切开复位钢针内固定术;指间关节固定术
14077	O209手外科	2024-11-03	2024-11-09	3565806	林勤坊	1	50Y	单指不全切断	手指骨折，其他的	治愈	宋永焕	李晓阳	史吏	手指离断术;残端皮肤修整术
14078	O209手外科	2024-10-30	2024-11-09	3565877	宋彩琴	2	54Y	取除骨折内固定装置	肺肿物;肝囊肿;脂肪肝	其他	毛方敏	毛方敏	毛方敏	脊柱内固定装置去除术
14079	O209手外科	2024-11-07	2024-11-09	3565888	张驰	1	33Y	掌骨多处骨折		治愈	蒋良福	王安远	罗祖程	掌骨骨折切开复位钢针内固定术;掌指骨骨折手法整复术
14080	O209手外科	2024-10-15	2024-11-10	3566163	刘万亮	1	67Y	开放性肱骨骨折	肩锁关节脱位;桡骨远端骨折;在前臂水平的静脉损伤;臂丛神经损伤;四根以上肋骨骨折不伴第一肋骨骨折;胸腔积液;创伤性湿肺;胆囊结石;下肢动脉粥样硬化;后天性肾囊肿;多发性脑梗死;老年性脑萎缩;脑梗死;2型糖尿病;高血压	治愈	蒋良福	王安远	罗祖程	肱骨骨折切开复位钢板内固定术;肘关节固定术;皮肤缝合术;头静脉缝合术;上肢关节囊缝合术;上肢肌屈指功能重建伴肌移位术;手带蒂皮瓣移植术;肩锁关节脱位切开复位内固定术;桡骨骨折切开复位钢板内固定术;手带蒂皮瓣移植术
14081	O209手外科	2024-10-20	2024-11-10	3566188	金序欣	1	50Y	腰椎骨折L2	脊神经损伤;后天性肾囊肿	治愈	倪文飞	吴爱悯	吴爱悯	腰椎骨折切开复位内固定术;椎弓根钉内固定术;金属脊椎融合物置入术
14082	O209手外科	2024-11-03	2024-11-11	3566616	岳国平	1	51Y	开放性多发性掌骨骨折	肝硬化;脂肪肝;肺大疱;特发性肺纤维化;前列腺结石;前列腺增生	治愈	宋永焕	李晓阳	史吏	掌骨骨折切开复位钢板内固定术;掌骨人工骨植骨术;指关节囊缝合术
14083	O209手外科	2024-11-07	2024-11-12	3566993	严则珍	1	61Y	趾伸肌腱断裂	趾骨骨折;足部皮肤撕裂伤;肝囊肿;胆囊息肉;后天性肾囊肿;前列腺增生;前列腺结石	治愈	陈星隆	李士	蔡海丰	趾肌腱缝合术;趾骨骨折切开复位钢针内固定术;带蒂皮瓣移植术
14084	O209手外科	2024-11-11	2024-11-12	3567246	颜云桂	1	31Y	取除骨折内固定装置		其他	蒋良福	王安远	罗祖程	掌骨内固定装置去除术;手指肌腱松解术
14085	O209手外科	2024-11-01	2024-11-13	3567478	姚红英	2	54Y	下肢创伤性切断	失血性休克;耻骨骨折;主动脉硬化;胆囊术后	好转	陈星隆	陈一衡	蔡海丰	下肢截断术;带蒂皮瓣移植术;创面封闭式负压引流术（VSD);肌腱、血管、神经探查术;创面封闭式负压引流术（VSD)
14086	O209手外科	2024-11-07	2024-11-13	3567488	温兴棕	1	63Y	创伤性指动脉破裂	指神经损伤;手指骨折，其他的;上肢皮肤裂伤;胸腔积液;主动脉硬化;后天性肾囊肿;前列腺结石	治愈	陈星隆	陈一衡	蔡海丰	指动脉缝合术;指神经缝合术;指骨骨折切开复位钢针内固定术;皮肤和皮下组织非切除性清创
14087	O209手外科	2024-10-12	2024-11-13	3567496	谢象威	1	67Y	踝部韧带断裂	开放性足损伤;腓骨骨折;距骨骨折;小腿挫伤;左房扩大;室间隔缺损;肺肿物;主动脉弓钙化;主动脉(瓣)关闭不全;二尖瓣反流	治愈	陈星隆	陈一衡	蔡海丰	踝骨病损切除术;踝关节韧带修补术;皮肤和皮下坏死组织切除清创术;踝骨病损切除术;踝骨病损切除术;踝关节囊缝合术;踝关节韧带修补术;腓骨骨折切开复位钢针内固定术;创面封闭式负压引流术（VSD);创面封闭式负压引流术（VSD);创面封闭式负压引流术（VSD);带蒂皮瓣移植术
14088	O209手外科	2024-11-10	2024-11-13	3567502	虞方义	1	63Y	取除骨折内固定装置	肺大疱;肝囊肿;肾结石;后天性肾囊肿;前列腺结石;前列腺增生;下肢静脉曲张	其他	陈星隆	陈一衡	蔡海丰	桡骨内固定装置去除术;皮肤瘢痕切除术
14089	O209手外科	2024-10-30	2024-11-13	3567504	林国岁	1	50Y	颈部脊髓损伤	颈椎间盘突出;颈椎椎管狭窄;颈椎骨折C5;颈椎骨折C7;额骨骨折;眶骨骨折;眼睑挫伤;高血压;2型糖尿病;前列腺结石	好转	毛方敏	毛方敏	毛方敏	颈椎后路单开门椎管减压术
14090	O209手外科	2024-11-09	2024-11-13	3567683	周恒迪	1	27Y	掌骨骨折	肺肿物;前列腺结石	治愈	陈星隆	陈一衡	蔡海丰	掌骨骨折切开复位钢板内固定术
14091	O209手外科	2024-10-22	2024-11-13	3567720	余长梅	2	44Y	掌部创伤性切断	在腕和手水平的多血管损伤;在腕和手水平的多处屈肌和肌腱损伤;在腕和手水平的多处伸肌和肌腱损伤;在腕和手水平的多神经损伤;腕骨多发性骨折;桡骨远端骨折;多指不全切断;掌骨多处骨折;腕部尺动脉损伤;尺骨骨折;腕部正中神经损伤;腕部尺神经损伤	好转	宋永焕	李晓阳	史吏	断掌再植术;掌骨骨折切开复位钢针内固定术;掌指关节脱位切开复位术;腕骨骨折切开复位钢针内固定术;尺骨骨折切开复位钢针内固定术;尺骨人工骨植骨术;掌指关节成形术;腕关节韧带重建术;正中神经缝合术;尺神经缝合术;尺动脉吻合术;屈指肌腱缝合术
14092	O209手外科	2024-11-12	2024-11-13	3567766	胡加平	1	49Y	取除骨折内固定装置	脂肪肝	其他	宋永焕	李晓阳	史吏	掌骨内固定装置去除术;手指肌腱松解术
14093	O209手外科	2024-11-07	2024-11-13	3567791	王宗根	1	28Y	创伤性指动脉破裂	腕和手多处神经损伤;手部桡神经损伤;腕和手多处伸肌和肌腱损伤;手指骨折，其他的;掌指关节脱位;上肢皮肤裂伤	治愈	陈星隆	李士	蔡海丰	指动脉缝合术;血管修补术;指骨骨折切开复位钢针内固定术;伸指肌腱缝合术;桡神经缝合术
14094	O209手外科	2024-11-07	2024-11-14	3567906	王术豪	1	29Y	掌骨多处骨折	肺肿物;肝钙化灶	治愈	陈星隆	李士	蔡海丰	掌骨骨折切开复位钢板内固定术
14095	O209手外科	2024-11-06	2024-11-14	3567979	徐巧贵	1	57Y	腰椎压缩性骨折	脊柱血管瘤;椎管内囊肿;后天性肾囊肿;肾结石;前列腺增生	好转	毛方敏	毛方敏	毛方敏	腰椎骨折球囊扩张成形术
14096	O209手外科	2024-11-09	2024-11-16	3568510	周林华	1	40Y	指神经损伤	指骨骨折;后天性肾囊肿	治愈	蒋良福	王安远	罗祖程	指神经移植术;指骨骨折切开复位钢针内固定术;指骨内固定装置去除术;手指肌腱松解术
14097	O209手外科	2024-11-08	2024-11-16	3568514	余运意	1	33Y	桡骨远端骨折	脂肪肝	治愈	蒋良福	王安远	罗祖程	腕关节韧带重建术;桡骨骨折切开复位钢板内固定术
14098	O209手外科	2024-11-11	2024-11-16	3568521	卢景浩	1	8Y	指骨骨折不连接		治愈	蒋良福	王安远	罗祖程	指骨骨折切开复位钢针内固定术
14099	O209手外科	2024-11-06	2024-11-16	3568659	陈怡	2	42Y	手部指伸肌腱损伤	手指多处骨折;指关节脱位;手指开放性伤口伴有指甲损害;手指挤压伤	治愈	虞庆	虞庆	朱旭伟	指关节脱位切开复位术;甲床清创术;筋膜皮瓣移植术;手部肌腱止点重建术;皮肤缝合术
14100	O209手外科	2024-11-11	2024-11-16	3568736	戴雪芬	2	57Y	手指骨折，其他的	肺肿物;冠状动脉粥样硬化;肝囊肿;脂肪肝;胆囊息肉;心功能不全	治愈	陈星隆	陈一衡	蔡海丰	指骨骨折切开复位钢板内固定术;指骨人工骨植骨术
14101	O209手外科	2024-11-10	2024-11-17	3569005	史燕敏	1	41Y	手指骨折，其他的	脂肪肝	治愈	陈星隆	李士	蔡海丰	指骨骨折切开复位钢针内固定术;指骨人工骨植骨术
14102	O209手外科	2024-11-12	2024-11-17	3569009	王其朋	1	32Y	手指骨折，其他的	肝回声不均;肝囊肿;肾结石	治愈	陈星隆	陈一衡	蔡海丰	指骨骨折切开复位钢板内固定术;指骨人工骨植骨术
14103	O209手外科	2024-11-10	2024-11-17	3569013	朱新强	1	31Y	舟骨骨折不连接	陈旧性舟骨月骨周围脱位;后天性肾囊肿	治愈	陈星隆	李士	蔡海丰	舟状骨植骨术;腕关节脱位切开复位内固定术;桡骨切除术用作移植物;腕骨骨折切开复位螺钉内固定术
14104	O209手外科	2024-11-09	2024-11-17	3569040	陈建	1	45Y	手部指伸肌腱损伤	手指骨折，其他的;手指开放性伤口不伴有指甲损害;高血压	治愈	宋永焕	李晓阳	史吏	上肢肌伸指功能重建伴肌移位术;指骨骨折切开复位钢针内固定术;皮肤缝合术
14105	O209手外科	2024-11-13	2024-11-18	3569461	厉陈洪	1	66Y	尺骨茎突骨折伴桡骨远端骨折	孤立性肺结节;肺气肿;后天性肾囊肿;脂肪肝	治愈	陈星隆	李士	蔡海丰	桡骨骨折切开复位钢板内固定术;关节软骨修复术
14106	O209手外科	2024-11-16	2024-11-18	3569561	叶林昆	1	47Y	手部桡动脉损伤	手部指伸肌腱损伤;开放性指骨骨折;皮肤挫伤;脂肪肝;前列腺结石	治愈	闫合德	吴志鹏	吴志鹏	伸指肌腱缝合术;指骨骨折切开复位钢针内固定术;桡动脉修补术;皮肤和皮下组织非切除性清创
14107	O209手外科	2024-11-16	2024-11-18	3569562	徐建勇	1	53Y	取除骨折内固定装置	高血压;脂肪肝;肾结石;前列腺增生;前列腺结石	其他	蒋良福	王安远	罗祖程	桡骨内固定装置去除术;前臂肌腱松解术
14108	O209手外科	2024-11-07	2024-11-19	3569788	黄苏女	2	62Y	胫后动脉损伤	胫神经损伤;踝和足趾长屈肌和肌腱损伤;足部皮肤撕裂伤;胫骨上端骨折;股骨外髁骨折;膝关节退行性病变;膝的其他和未特指部位的扭伤和劳损;膝关节软骨撕裂;膝关节积液;肺肿物	治愈	陈星隆	陈一衡	蔡海丰	胫动脉缝合术;胫神经缝合术;下肢肌腱缝合术;下肢植皮术;创面封闭式负压引流术（VSD)
14109	O209手外科	2024-11-13	2024-11-19	3569828	贾贤剑	1	29Y	腕骨多发性骨折	前臂挤压伤;脂肪肝	治愈	陈星隆	李士	蔡海丰
14110	O209手外科	2024-10-30	2024-11-19	3569835	杨金彩	2	73Y	胸椎多处骨折	腰椎骨折L3;肩胛骨骨折;创伤性蛛网膜下腔出血;创伤性硬膜下出血;骨质疏松;头皮血肿;肋骨多处骨折;胸腔积液;肺大疱;肾挫伤;皮下血肿;皮肤挫伤;胆囊结石;房性期前收缩[房性早搏];心房颤动;贫血;泌尿道感染	治愈	毛方敏	毛方敏	毛方敏	胸椎骨折球囊扩张成形术;腰椎骨折球囊扩张成形术
14111	O209手外科	2024-11-16	2024-11-20	3570430	姜红	2	44Y	鹰嘴骨折		治愈	蒋良福	王安远	罗祖程	尺骨骨折切开复位螺钉内固定术;肘关节固定术
14112	O209手外科	2024-10-24	2024-11-20	3570447	连兰花	2	66Y	开放性拇趾骨折	开放性足损伤;趾关节脱位;趾伸肌腱断裂;下肢皮肤撕裂伤	治愈	李志杰	褚庭纲	徐海艇	趾骨骨折切开复位钢针内固定术;创面封闭式负压引流术（VSD);下肢植皮术;趾关节脱位切开复位术;皮片取皮术;足关节囊缝合术;创面封闭式负压引流术（VSD);创面封闭式负压引流术（VSD)
14113	O209手外科	2024-11-14	2024-11-21	3570629	苏忠潮	1	49Y	掌骨骨折	脂肪肝	好转	蒋良福	王安远	罗祖程	掌骨骨折切开复位钢板内固定术;掌骨人工骨植骨术
14114	O209手外科	2024-11-16	2024-11-21	3570772	潘宏	1	48Y	指骨骨折不连接	支气管扩张(症);肺气肿;肾结石	治愈	蒋良福	王安远	罗祖程	指骨骨折切开复位钢针内固定术;手带蒂皮瓣移植术;指关节囊缝合术
14115	O209手外科	2024-11-16	2024-11-23	3571371	范叔通	1	33Y	皮瓣移植感染	腓骨骨折;肩袖损伤;胫神经损伤;腓总神经损伤;骨折术后恢复期;胫骨平台骨折;膝的其他和未特指部位的扭伤和劳损;颈椎间盘突出;肺肿物	治愈	蒋良福	王安远	罗祖程	皮肤和皮下坏死组织切除清创术;下肢肌腱松解术
14116	O209手外科	2024-11-14	2024-11-23	3571374	洪孙义	1	33Y	开放性拇指骨折	单指不全切断	治愈	蒋良福	王安远	罗祖程	指骨骨折切开复位钢针内固定术;手带蒂皮瓣移植术;残端皮肤修整术;甲床清创术;皮肤和皮下坏死组织切除清创术
14117	O209手外科	2024-11-13	2024-11-23	3571380	王苏玲	2	50Y	手指开放性伤口伴有指甲损害	手指骨折，其他的;肺肿物;肝回声不均	治愈	陈星隆	李士	蔡海丰	手带蒂皮瓣移植术;皮片取皮术;甲床清创术
14118	O209手外科	2024-11-20	2024-11-23	3571397	叶盛爱	2	63Y	掌骨骨折	面部挫伤;膝关节损伤;多发性肝囊肿	治愈	蒋良福	王安远	罗祖程	掌骨骨折闭合复位钢针内固定术
14119	O209手外科	2024-11-19	2024-11-23	3571422	黄燕清	2	31Y	取除骨折内固定装置		其他	陈星隆	李士	蔡海丰	肱骨内固定装置去除术;尺骨内固定装置去除术;皮肤瘢痕切除术
14120	O209手外科	2024-11-18	2024-11-24	3571734	黄丽丽	2	39Y	锁骨骨折	胸椎横突骨折;肺炎;跟骨骨折	治愈	蒋良福	王安远	罗祖程	锁骨骨折切开复位钢针内固定术;肩关节固定术
14121	O209手外科	2024-11-19	2024-11-24	3571736	钟炳榜	1	61Y	手指指神经损伤,其他的	手指骨折，其他的;手指开放性伤口伴有指甲损害;后天性肾囊肿;前列腺结石;肺气肿;肺肿物;特发性肺纤维化;主动脉(瓣)关闭不全	治愈	陈星隆	李士	蔡海丰	指神经缝合术;手带蒂皮瓣移植术;手肌腱、血管、神经探查术
14122	O209手外科	2024-11-15	2024-11-24	3571821	郑丹	2	29Y	三踝骨折	踝关节脱位;足部软组织撕脱伤;足黑素细胞痣	治愈	陈星隆	李士	蔡海丰	踝关节骨折切开复位钢板内固定术;皮肤色素痣切除术
14123	O209手外科	2024-11-23	2024-11-24	3572034	罗笑天	1	14Y	掌骨骨折		治愈	蒋良福	王安远	罗祖程	锁骨骨折闭合复位钢针内固定术
14124	O209手外科	2024-11-19	2024-11-25	3572256	毛爱华	2	36Y	手指开放性伤口伴有指甲损害	手指骨折，其他的;肺肿物	治愈	虞庆	虞庆	朱旭伟	指皮肤游离移植术;手带蒂皮瓣移植术;甲床清创术
14125	O209手外科	2024-11-19	2024-11-25	3572262	郑昌初	1	57Y	指神经损伤	拇指骨折;拇指开放性损伤伴指甲损伤;肾钙化;后天性肾囊肿;脂肪肝	治愈	陈星隆	李士	蔡海丰	指神经缝合术;指骨骨折切开复位钢针内固定术;手带蒂皮瓣移植术;指骨人工骨植骨术;甲床清创术;手肌腱、血管、神经探查术
14126	O209手外科	2024-11-12	2024-11-25	3572264	丁朝霞	2	60Y	肱骨外科颈骨折	肩关节半脱位;下肢静脉肌间血栓形成;多处挫伤;肾结石;二尖瓣反流;肋骨多处骨折	治愈	陈星隆	李士	蔡海丰	肱骨骨折切开复位钢板内固定术;肩袖修补术
14127	O209手外科	2024-11-22	2024-11-27	3573078	徐象益	1	55Y	单指不全切断	在腕和手水平的多神经损伤;开放性特指指骨骨折;腕和手指伸肌腱损伤;腕和手指屈肌腱损伤;创伤性指动脉破裂	治愈	宋永焕	宋永焕	史吏	手指断指再植术;动脉修补术;指神经缝合术;上肢肌屈指功能重建伴肌移位术;上肢肌伸指功能重建伴肌移位术;指骨骨折切开复位钢针内固定术;手带蒂皮瓣移植术
14128	O209手外科	2024-11-16	2024-11-27	3573219	陈梅平	1	53Y	创伤性胫后动静脉损伤	踝和足皮感觉神经损伤;开放性跟骨骨折;踝和足肌肉和肌腱损伤	治愈	闫合德	吴志鹏	吴志鹏	胫静脉缝合术;皮神经缝合术;跟骨骨折切开复位钢针内固定术;皮肤缝合术
14129	O209手外科	2024-11-20	2024-11-27	3573283	冯济云	1	58Y	锁骨骨折		治愈	蒋良福	王安远	罗祖程	锁骨骨折切开复位钢板内固定术
14130	O209手外科	2024-11-24	2024-11-27	3573295	林冰雪	1	48Y	取除骨折内固定装置		其他	蒋良福	王安远	罗祖程	掌骨内固定装置去除术;指骨内固定装置去除术;手指肌腱松解术
14131	O209手外科	2024-11-24	2024-11-27	3573326	莫君敏	2	38Y	手指骨折，其他的	高血压	治愈	陈星隆	陈一衡	蔡海丰	指骨骨折切开复位钢针内固定术;韧带修补术
14132	O209手外科	2024-11-16	2024-11-28	3573705	刘海明	1	41Y	肱骨髁间骨折	桡骨骨折;上肢神经的损伤;前臂肌肉和肌腱损伤;脂肪肝	治愈	陈星隆	李士	蔡海丰	肱骨骨折切开复位钢板内固定术;肱骨人工骨植骨术;尺神经松解术
14133	O209手外科	2024-11-22	2024-11-29	3573825	杨乃修	1	72Y	尺骨茎突骨折伴桡骨远端骨折		治愈	宋永焕	李晓阳	史吏	桡骨骨折切开复位钢板内固定术;尺骨骨折切开复位钢针内固定术;肘关节韧带修补术;关节软骨修复术
14134	O209手外科	2024-11-26	2024-11-30	3574121	罗永红	1	43Y	手部指伸肌腱损伤	开放性多发性指骨骨折;后天性肾囊肿;肾结石	治愈	蒋良福	王安远	罗祖程	手部伸肌腱缝合术;指骨骨折切开复位钢针内固定术;指骨人工骨植骨术;皮肤和皮下坏死组织切除清创术;石膏夹板固定
14135	O209手外科	2024-10-12	2024-11-30	3574152	金福喜	1	56Y	创伤后伤口感染	足部骨髓炎;骨折术后;后天性肾囊肿;肾结石;前列腺结石;前列腺增生	治愈	李志杰	褚庭纲	徐海艇	皮肤和皮下坏死组织切除清创术;创面封闭式负压引流术（VSD);创面封闭式负压引流术（VSD);游离皮瓣移植术;皮片取皮术;焦痂切除术;足骨病损切除术;皮肤和皮下坏死组织切除清创术;游离皮肤移植;皮肤和皮下坏死组织切除清创术;皮肤和皮下坏死组织切除清创术
14136	O209手外科	2024-11-26	2024-12-01	3574563	赵金松	1	56Y	拇趾骨折	脂肪肝;后天性肾囊肿;前列腺结石	治愈	陈星隆	李士	蔡海丰	趾骨骨折切开复位钢针内固定术;副韧带修补术
14137	O209手外科	2024-11-14	2024-12-02	3575013	文永国	1	51Y	创伤性桡动脉断裂	在腕和手水平的多处伸肌和肌腱损伤;开放性尺骨桡骨骨折;前臂静脉损伤;在前臂水平的桡神经损伤;上肢皮肤裂伤;在前臂水平的正中神经损伤;前臂尺神经损伤	治愈	蒋良福	王安远	罗祖程	桡动脉修补术;头静脉缝合术;正中神经缝合术;尺神经缝合术;上肢肌伸指功能重建伴肌移位术;尺骨骨折切开复位钢板内固定术;桡骨骨折切开复位钢板内固定术;桡神经缝合术;皮肤缝合术
14138	O209手外科	2024-11-24	2024-12-02	3575030	杨卫平	1	47Y	单指不全切断	指神经损伤;创伤性指动脉破裂;手指骨折，其他的;陈旧性肺结核;肺气肿;脂肪肝	好转	虞庆	虞庆	朱旭伟	手指断指再植术;指动脉缝合术;指神经缝合术
14139	O209手外科	2024-10-21	2024-12-02	3575054	潘贻敏	1	42Y	踝关节骨折	胫距关节脱位;踝和足神经损伤;多处挫伤;阑尾术后;脂肪肝	治愈	蒋良福	王安远	罗祖程	中厚皮片移植术;皮片取皮术;踝关节骨折切开复位螺钉内固定术;腓骨骨折切开复位髓内针内固定术;创面封闭式负压引流术（VSD);胫骨外固定术;创面封闭式负压引流术（VSD)
14140	O209手外科	2024-11-26	2024-12-03	3575411	刘建	1	26Y	手部桡神经损伤	手指多处骨折;手指挤压伤;肾结石;手指开放性伤口伴有指甲损害	治愈	陈星隆	李士	蔡海丰	指骨骨折切开复位钢针内固定术;手带蒂皮瓣移植术;甲床清创术;指神经缝合术
14141	O209手外科	2024-11-21	2024-12-04	3575830	孙友芬	2	69Y	小腿神经损伤	下肢皮肤撕裂伤;膝挫伤;股骨骨折;胫骨骨折;半月板损伤;膝关节副韧带损伤;髌韧带损伤;多处挫伤;头皮血肿;眼挫伤;膝关节退行性病变;高血压;孤立性肺结节;主动脉钙化;脂肪肝;低钾血症;泌尿道感染	治愈	高伟阳	丁健	张里练	隐神经修复术;肌腱、血管、神经探查术;皮肤和皮下组织非切除性清创;皮肤缝合术
14142	O209手外科	2024-11-29	2024-12-04	3575861	潘奶玉	1	74Y	腕和手多处伸肌和肌腱损伤	开放性多发性指骨骨折;创伤性上肢骨缺损;肺大疱;脂肪肝;肾结石;前列腺增生;前列腺结石	治愈	闫合德	周飞亚	吴志鹏	伸指肌腱侧束缝合术;指骨骨折切开复位钢板内固定术;皮肤和皮下坏死组织切除清创术;石膏夹板固定
14143	O209手外科	2024-12-03	2024-12-04	3575954	季光伟	1	51Y	手指骨折，其他的	脂肪肝;后天性肾囊肿;肾结石;前列腺结石	治愈	蒋良福	王安远	罗祖程	指骨骨折闭合复位钢针内固定术
14144	O209手外科	2024-12-03	2024-12-05	3576225	郑海慧	2	43Y	取除骨折内固定装置	特发性(原发性)高血压;肝回声不均;胆囊息肉;肾结石	其他	陈星隆	李士	蔡海丰	掌骨内固定装置去除术;皮肤瘢痕切除术
14145	O209手外科	2024-11-28	2024-12-05	3576319	陈光出	1	54Y	肱骨干骨折	慢性肝病;后天性肾囊肿;孤立性肺结节;特发性肺纤维化;副脾	治愈	陈星隆	陈一衡	蔡海丰	肱骨骨折切开复位钢板内固定术
14146	O209手外科	2024-12-01	2024-12-05	3576321	陈玉琴	2	72Y	鹰嘴骨折	头皮血肿;特发性(原发性)高血压;室间隔肥大;二尖瓣退行性变;下肢动脉硬化闭塞症;肺大疱;心功能不全	治愈	陈星隆	李士	蔡海丰	尺骨骨折切开复位螺钉内固定术;关节软骨修复术
14147	O209手外科	2024-11-04	2024-12-05	3576347	李凤玉	2	55Y	多指不全切断	开放性多发性指骨骨折;腕和手指内在肌腱损伤;创伤后伤口感染;脂肪肝;胆囊息肉	治愈	闫合德	吴志鹏	吴志鹏	指动脉缝合术;指骨病损切除术;皮肤和皮下坏死组织切除清创术;指神经缝合术;指皮肤游离移植术;指骨骨折切开复位钢针内固定术;伸指肌腱缝合术;屈指肌腱缝合术;指关节囊缝合术
14148	O209手外科	2024-11-30	2024-12-05	3576374	肖道旺	1	67Y	肩袖损伤	特发性(原发性)高血压;腰椎骨折;脂肪肝;多发性肝囊肿;肾结石;胆囊结石;炎症后肺纤维化;肺大疱;主动脉钙化	治愈	蒋良福	王安远	罗祖程	肩关节镜下肩袖修补术;关节镜肩关节滑膜切除术;肩峰成形术
14149	O209手外科	2024-12-03	2024-12-05	3576391	李美丽	2	41Y	手指开放性伤口伴有指甲损害	手指骨折，其他的	治愈	高伟阳	林大木	张里练	甲床清创术;手带蒂皮瓣移植术
14150	O209手外科	2024-11-30	2024-12-07	3576781	马斌	1	47Y	腕和手拇指伸肌腱损伤	桡骨干骨折;腕和手指内在肌和肌腱损伤;肩和上臂肌肉损伤;在前臂水平的桡神经损伤;上肢皮肤缺损;肺肿物	好转	虞庆	虞庆	朱旭伟	伸指肌腱缝合术;桡骨骨折切开复位钢板内固定术;桡神经缝合术;手带蒂皮瓣移植术
14151	O209手外科	2024-12-01	2024-12-08	3577217	王宣传	1	27Y	腕舟骨月骨周围脱位	月骨骨折;桡骨茎突骨折;三角骨骨折;肺肿物	治愈	蒋良福	王安远	罗祖程	腕关节脱位切开复位内固定术;桡骨骨折切开复位螺钉内固定术;腕关节韧带重建术
14152	O209手外科	2024-11-30	2024-12-08	3577227	柏华峰	1	41Y	单指不全切断	手指骨折，其他的;消化性溃疡;脂肪肝;前列腺增生;前列腺结石	好转	虞庆	虞庆	朱旭伟	手指断指再植术;指骨骨折切开复位钢针内固定术
14153	O209手外科	2024-11-29	2024-12-08	3577231	吴永珠	2	70Y	尺骨茎突骨折伴桡骨远端骨折	多发性肝囊肿;胆管结石;肝胆管扩张;后天性肾囊肿;室间隔肥大;主动脉(瓣)关闭不全;二尖瓣反流;心功能不全	治愈	闫合德	周飞亚	周飞亚	桡骨骨折切开复位钢板内固定术
14154	O209手外科	2024-11-22	2024-12-08	3577249	张钟柱	1	77Y	开放性胫骨骨折	肺部感染;2型糖尿病;低色素性贫血;低蛋白血症;胃恶性肿瘤个人史	治愈	李晓阳	宋永焕	史吏	胫骨骨折切开复位钢板内固定术;胫骨人工骨植骨术;副韧带修补术
14155	O209手外科	2024-11-28	2024-12-08	3577264	罗永浩	1	34Y	尺骨和桡骨骨干均骨折	桡骨远端骨折;三角骨骨折;钩骨骨折;小多角骨骨折;掌骨骨折	治愈	宋永焕	李晓阳	史吏	尺骨骨折切开复位钢板内固定术;腕关节韧带重建术;尺骨人工骨植骨术;桡骨骨折切开复位钢板内固定术
14156	O209手外科	2024-11-25	2024-12-08	3577266	王顺友	1	56Y	尺骨茎突骨折伴桡骨远端骨折	肘关节脱位;上臂桡神经损伤;肘关节紊乱	治愈	陈星隆	陈一衡	蔡海丰	桡骨骨折切开复位钢板内固定术;尺骨骨折切开复位钢板内固定术;肘关节脱位切开复位内固定术;上肢韧带缝合术;桡神经松解术;创面封闭式负压引流术（VSD);手带蒂皮瓣移植术
14157	O209手外科	2024-12-01	2024-12-09	3577694	赵开素	2	45Y	开放性多发性掌骨骨折	开放性指骨骨折;胆囊结石	治愈	蒋良福	王安远	罗祖程	掌骨骨折切开复位钢针内固定术;指骨骨折切开复位钢针内固定术;掌骨人工骨植骨术;指骨人工骨植骨术
14158	O209手外科	2024-12-01	2024-12-09	3577699	叶利松	1	54Y	拇指开放性损伤伴指甲损伤	开放性拇指骨折;特发性(原发性)高血压;脂肪肝;胆囊结石;糖尿病	治愈	蒋良福	王安远	罗祖程	手带蒂皮瓣移植术;指皮肤游离移植术;甲床清创术
14159	O209手外科	2024-12-02	2024-12-09	3577715	朱宗汉	1	42Y	手部桡神经损伤	手部尺神经损伤;手指骨折，其他的;腕和手指屈肌腱损伤;在腕和手水平的肌肉和肌腱的损伤;手指开放性伤口不伴有指甲损害;肺肿物;肝回声不均;后天性肾囊肿	治愈	陈星隆	李士	陈一衡	桡神经缝合术;上肢肌屈指功能重建伴肌移位术;手带蒂皮瓣移植术;尺神经缝合术;屈指肌腱缝合术;皮肤和皮下组织非切除性清创
14160	O209手外科	2024-11-28	2024-12-09	3577716	李日唐	1	72Y	盖氏骨折	尺桡关节脱位;高血压;面部挫伤;肺气肿合并肺大泡;肝回声不均;前列腺增生;后天性肾囊肿;室间隔肥大;心功能不全	治愈	陈星隆	李士	陈一衡	桡骨骨折切开复位钢板内固定术;尺桡关节脱位切开复位术
14161	O209手外科	2024-12-04	2024-12-09	3577724	徐玉钗	2	89Y	老年性骨质疏松伴病理性骨折	特发性(原发性)高血压;陈旧性肺结核;下肢动脉粥样硬化	治愈	武垚森	王胜	王胜	胸椎骨折球囊扩张成形术;椎骨活组织检查
14162	O209手外科	2024-12-06	2024-12-09	3577811	倪晨希	2	8Y	肱骨髁上骨折	脊柱侧弯	治愈	陈龙	应晓洲	应晓洲	肱骨骨折闭合复位钢针内固定术;石膏托固定术
14163	O209手外科	2024-12-07	2024-12-09	3577881	赵福林	1	41Y	手指指神经损伤,其他的	腕和手指屈肌和肌腱损伤;指间关节脱位;手指开放性伤口不伴有指甲损害;手指骨折，其他的;肝下垂;肺肿物	治愈	陈星隆	李士	陈一衡	指神经吻合术;屈指肌腱缝合术;指骨骨折切开复位钢针内固定术;指关节脱位切开复位术;手带蒂皮瓣移植术
14164	O209手外科	2024-11-19	2024-12-10	3578148	蔡成杨	1	45Y	前臂正中神经损伤	开放性桡骨骨折;前臂桡神经损伤;前臂尺神经断裂;肱骨骨折;前臂伸肌腱损伤;肺肿物;肺大疱	治愈	陈星隆	李士	陈一衡	正中神经吻合术;手带蒂皮瓣移植术;肱骨骨折切开复位钢板内固定术;中厚皮片移植术;桡骨和尺骨骨折开放性复位术伴内固定;手肌腱、血管、神经探查术;尺骨人工骨植骨术;桡骨人工骨植骨术;创面封闭式负压引流术（VSD);皮片取皮术;皮肤和皮下坏死组织切除清创术
14165	O209手外科	2024-12-07	2024-12-10	3578153	洪毅	1	30Y	前臂内侧皮神经损伤	腕和手多处伸肌和肌腱损伤;掌骨骨折;胆囊息肉;肾结石	治愈	陈星隆	李士	陈一衡	掌骨骨折切开复位钢板内固定术;上肢肌伸指功能重建伴肌移位术;皮神经缝合术;指关节囊缝合术
14166	O209手外科	2024-12-07	2024-12-11	3578492	付文栋	1	23Y	掌骨骨折		治愈	陈星隆	李士	陈一衡	掌骨骨折闭合复位钢针内固定术
14167	O209手外科	2024-12-07	2024-12-11	3578493	陈葱娇	2	58Y	拇指指神经损伤	开放性拇指骨折;脂肪肝;纵隔肿物	治愈	陈星隆	陈一衡	蔡海丰	指神经缝合术;指骨骨折切开复位钢针内固定术;手带蒂皮瓣移植术
14168	O209手外科	2024-12-06	2024-12-11	3578716	陈学弟	1	58Y	锁骨骨折		治愈	陈星隆	李士	蔡海丰	锁骨骨折切开复位钢板内固定术
14169	O209手外科	2024-12-09	2024-12-12	3578935	沙淑燕	2	47Y	取除骨折内固定装置	肺肿物;下肢静脉曲张	其他	蒋良福	王安远	罗祖程	桡骨内固定装置去除术;皮肤瘢痕切除术
14170	O209手外科	2024-12-09	2024-12-12	3578962	方仲辉	1	27Y	取除骨折内固定装置		其他	陈星隆	李士	陈一衡	尺骨内固定装置去除术
14171	O209手外科	2024-12-08	2024-12-12	3579059	卢贞云	1	30Y	掌骨骨折	肺大疱;肺肿物	治愈	陈星隆	李士	陈一衡	掌骨骨折切开复位钢针内固定术
14172	O209手外科	2024-12-09	2024-12-12	3579159	李凤钗	2	63Y	取除骨折内固定装置	尺骨茎突骨折;下肢动脉粥样硬化;特发性(原发性)高血压;脂肪肝;胆囊胆固醇沉着症;主动脉钙化;二尖瓣反流;主动脉(瓣)关闭不全;心功能不全	其他	陈星隆	李士	陈一衡	桡骨内固定装置去除术
14173	O209手外科	2024-12-08	2024-12-14	3579678	周行成	1	65Y	手指骨折，其他的	高血压;脂肪肝	治愈	蒋良福	王安远	罗祖程	指骨骨折切开复位钢针内固定术;手带蒂皮瓣移植术;指骨人工骨植骨术
14174	O209手外科	2024-11-26	2024-12-14	3579682	陈岳孝	1	59Y	创伤性指动脉破裂	开放性多发性指骨骨折;腕关节脱位;掌骨多处骨折;腕和手拇指伸肌腱损伤;在腕和手水平的多神经损伤;上肢皮肤裂伤;掌浅动静脉弓损伤	治愈	蒋良福	王安远	罗祖程	上肢动脉组织补片修补术;指骨骨折切开复位螺钉内固定术;掌骨骨折切开复位钢针内固定术;腕关节脱位切开复位内固定术;指神经吻合术;上肢肌伸拇功能重建伴肌移位术;皮肤缝合术;指骨人工骨植骨术
14175	O209手外科	2024-12-07	2024-12-14	3579717	苏志文	1	34Y	腕舟骨骨折	腕舟骨月骨周围脱位;尺骨茎突骨折;月骨骨折;关节不稳定;脂肪肝;副脾;后天性肾囊肿	治愈	陈星隆	李士	陈一衡	腕骨骨折切开复位钢针内固定术;腕韧带松解术;尺桡关节脱位切开复位术;腕关节成形术
14176	O209手外科	2024-12-10	2024-12-14	3579766	陈俊凯	1	22Y	手指骨折，其他的	桡侧副韧带断裂;脂肪肝	治愈	陈星隆	李士	蔡海丰	指骨骨折切开复位螺钉内固定术;指间关节侧副韧带重建术
14177	O209手外科	2024-12-10	2024-12-15	3580114	沈德伍	1	50Y	尺骨茎突骨折伴桡骨远端骨折		治愈	陈星隆	陈一衡	蔡海丰	桡骨骨折切开复位钢板内固定术;关节软骨修复术
14178	O209手外科	2024-12-07	2024-12-16	3580471	赵福志	1	45Y	手指开放性伤口伴有指甲损害	手指骨折，其他的;手指挤压伤;肝回声不均;前列腺结石	治愈	陈星隆	李士	陈一衡	手带蒂皮瓣移植术;甲床清创术;手肌腱、血管、神经探查术
14179	O209手外科	2024-12-08	2024-12-16	3580474	刘培慈	1	49Y	肱动脉损伤	上臂正中神经损伤;上臂尺神经损伤;上臂桡神经损伤;肱三头肌肌肉损伤;创伤性肱二头肌断裂;桡骨远端骨折;胆囊息肉;前列腺结石;肺肿物;上肢皮肤裂伤;血吸虫性肝炎	治愈	陈星隆	李士	陈一衡	肱动脉修补术;肱二头肌缝合术;肱三头肌缝合术;臂丛神经探查术;手带蒂皮瓣移植术
14180	O209手外科	2024-12-07	2024-12-16	3580514	陈国祥	1	28Y	创伤性指动脉破裂	手指骨折，其他的;腕和手指屈肌腱损伤;指神经损伤;指关节扭伤	治愈	陈星隆	陈一衡	李士	上肢动脉组织补片修补术;手带蒂皮瓣移植术;上肢肌屈指功能重建伴肌移位术;指骨骨折切开复位钢针内固定术;屈指肌腱缝合术;指骨人工骨植骨术;皮肤和皮下坏死组织切除清创术;指神经移植术;指关节脱位切开复位术
14181	O209手外科	2024-12-07	2024-12-16	3580557	潘碎芬	2	53Y	掌骨骨折	2型糖尿病;肺占位性病变	治愈	陈星隆	李士	陈一衡	掌骨骨折闭合复位钢板内固定术
14182	O209手外科	2024-12-08	2024-12-16	3580626	肖诗海	1	58Y	单指不全切断	手部指伸肌腱损伤;开放性指骨骨折;手指开放性伤口不伴有指甲损害;高血压	治愈	蒋良福	王安远	罗祖程	手指断指再植术;指动脉缝合术;指骨骨折切开复位钢针内固定术;指间关节固定术;指神经吻合术;手带蒂皮瓣移植术;指骨人工骨植骨术;上肢肌伸指功能重建伴肌移位术;上肢动脉组织补片修补术
14183	O209手外科	2024-12-15	2024-12-17	3581007	黄德钏	1	38Y	取除骨折内固定装置	脂肪肝;前列腺结石	其他	石成弟	项光恒	项光恒	掌骨内固定装置去除术;皮肤瘢痕切除术
14184	O209手外科	2024-12-06	2024-12-18	3581438	林其炮	1	48Y	在腕和手水平的尺动脉损伤	手部桡动脉损伤;掌深动静脉弓损伤;创伤性上肢骨缺损;手部拇指长屈肌和肌腱损伤;在腕和手水平的肌肉和肌腱的损伤;手部拇指伸肌腱损伤;开放性第一掌骨骨折;头部的损伤;指间关节脱位	好转	李志杰	褚庭纲	徐海艇	用其他类型补片移植物的血管修补术;指关节脱位切开复位术;创面封闭式负压引流术（VSD);上肢肌伸拇功能重建伴肌移位术;掌骨骨折闭合复位钢针内固定术;中厚皮片移植术;上肢肌伸拇功能重建伴肌移位术;桡动脉缝合术;掌骨人工骨植骨术
14185	O209手外科	2024-12-17	2024-12-19	3581815	王政凯	1	9Y	取除骨折内固定装置		其他	陈星隆	李士	陈一衡	锁骨内固定装置去除术;皮肤瘢痕切除术
14186	O209手外科	2024-12-12	2024-12-20	3582151	黄孙坤	1	28Y	桡骨远端骨折	脂肪肝;肾结石;后天性肾囊肿	治愈	陈星隆	李士	蔡海丰	桡骨骨折切开复位钢板内固定术
14187	O209手外科	2024-12-17	2024-12-21	3582375	刘建和	1	43Y	取除骨折内固定装置		其他	陈星隆	陈一衡	蔡海丰	踝关节内固定装置去除术
14188	O209手外科	2024-12-14	2024-12-21	3582377	林东平	1	64Y	在腕和手水平的尺神经损伤	掌骨多处骨折;腕和手多处伸肌和肌腱损伤;手指血管损伤,其他的;腕和手指内在肌和肌腱损伤;下肢皮肤撕裂伤;肝囊肿;肺肿物;脂肪肝;前列腺结石;前列腺增生	治愈	蒋良福	王安远	罗祖程	尺神经吻合术;手带蒂皮瓣移植术;掌骨骨折切开复位钢针内固定术;上肢肌伸指功能重建伴肌移位术;伸指肌腱缝合术
14189	O209手外科	2024-12-16	2024-12-21	3582452	黄腾翀	1	38Y	锁骨骨折	胆囊结石;后天性肾囊肿;肾结石;肺肿物;胆囊胆固醇沉着症	治愈	蒋良福	王安远	罗祖程	锁骨骨折切开复位钢板内固定术;周围神经松解术
14190	O209手外科	2024-12-18	2024-12-21	3582548	童德珍	2	54Y	骨质疏松伴有病理性骨折	肾结石;脂肪肝;后天性肾囊肿	好转	武垚森	王胜	武垚森
14191	O209手外科	2024-12-18	2024-12-22	3582808	马进龙	1	52Y	开放性多发性指骨骨折	腕和手指伸肌腱损伤;桡侧副韧带断裂;创伤性上肢骨缺损;指关节脱位;肝囊肿;胆囊息肉;后天性肾囊肿;肾结石	治愈	闫合德	周飞亚	周飞亚	指骨骨折切开复位钢板内固定术;指骨人工骨植骨术;伸指肌腱缝合术;韧带修补术;指关节脱位切开复位术
14192	O209手外科	2024-12-14	2024-12-22	3582851	叶八一	1	42Y	手指骨折，其他的		治愈	蒋良福	王安远	罗祖程	指骨骨折切开复位钢针内固定术;指骨人工骨植骨术
14193	O209手外科	2024-12-18	2024-12-22	3582868	朱艳华	1	50Y	躯干多发性骨折	胸椎骨折T11/T12;腰椎骨折L1;骶骨骨折;多处挫伤;腰椎间盘突出;后天性肾囊肿;肺肿物;肝囊肿	未愈	王向阳	盛孙仁	孙泽明
14194	O209手外科	2024-12-14	2024-12-23	3583288	黄道通	1	35Y	开放性指骨骨折	指间关节脱位;手指开放性伤口不伴有指甲损害;肝血管瘤;胆囊息肉	治愈	蒋良福	王安远	罗祖程	指骨骨折切开复位钢针内固定术;指骨人工骨植骨术;手带蒂皮瓣移植术;皮肤切除用作移植物
14195	O209手外科	2024-12-06	2024-12-23	3583289	陈汉飞	1	66Y	前臂正中神经断裂	前臂尺神经损伤;上肢骨筋膜室综合征;尺骨骨折;上肢皮肤裂伤;腕管综合征;高血压	治愈	李志杰	褚庭纲	徐海艇	正中神经修复术;尺神经缝合术;手带蒂皮瓣移植术;尺骨骨折切开复位钢板内固定术;皮肤和皮下坏死组织切除清创术;筋膜切开术;皮瓣修整术;腕管松解术;创面封闭式负压引流术（VSD)
14196	O209手外科	2024-12-21	2024-12-23	3583290	蔡华威	1	26Y	取除骨折内固定装置	肺肿物;脂肪肝	其他	蒋良福	王安远	罗祖程	桡骨和尺骨置入装置去除
14197	O209手外科	2024-12-20	2024-12-23	3583402	李挺森	1	83Y	胸椎骨折T7/T8	骨质疏松;高血压;腰椎退行性病变;腰椎间盘突出;腰椎椎管狭窄;腰椎峡部裂;腰椎滑脱;下肢动脉粥样硬化;肾结石;前列腺结石;心功能不全;胸椎退行性病变	好转	毛方敏	毛方敏	潘翔翔	胸椎骨折球囊扩张成形术
14198	O209手外科	2024-12-20	2024-12-24	3583652	钱阿娟	2	82Y	胸椎压缩性骨折	骨质疏松;腰椎退行性病变;肺肿物;脊柱侧弯;胸腔积液	好转	倪文飞	许聪	许聪	胸椎骨折球囊扩张成形术;经皮椎骨成形术
14199	O209手外科	2024-12-21	2024-12-24	3583677	陈颖恺	1	38Y	取除骨折内固定装置	甲状腺术后;孤立性肺结节;脂肪肝;胆囊结石;半月板损伤;膝关节十字韧带损伤;膝关节积液;膝的其他和未特指部位的扭伤和劳损	其他	蒋良福	王安远	罗祖程	锁骨内固定装置去除术;皮肤瘢痕切除术
14200	O209手外科	2024-12-08	2024-12-24	3583679	蒋玉兰	2	54Y	创伤性指动脉破裂	尺骨茎突骨折;下尺桡关节脱位;掌骨骨折;指骨骨折;上肢皮肤裂伤;手部尺神经损伤;肺肿物;尺骨下端骨折;淋巴结钙化;主动脉钙化	治愈	蒋良福	王安远	罗祖程	指动脉缝合术;尺骨骨折切开复位钢针内固定术;腕关节韧带重建术;手带蒂皮瓣移植术;尺桡关节脱位切开复位术
14201	O209手外科	2024-12-11	2024-12-24	3583739	刘碎仁	2	75Y	肱骨远端骨折	特发性(原发性)高血压;后天性肾囊肿;肺部感染;主动脉钙化;下肢动脉粥样硬化	治愈	蒋良福	王安远	罗祖程	肱骨骨折切开复位钢板内固定术;关节软骨修复术;尺神经松解术
14202	O209手外科	2024-12-21	2024-12-24	3583952	李艳青	2	33Y	手指骨折，其他的		治愈	陈星隆	陈一衡	蔡海丰	指骨骨折闭合复位髓内针内固定术
14203	O209手外科	2024-12-17	2024-12-25	3584153	余孟光	1	57Y	尺骨茎突骨折伴桡骨远端骨折	肺部感染;肝囊肿;下肢静脉曲张;脂肪肝;心功能不全;前列腺钙化灶	治愈	陈星隆	陈一衡	蔡海丰	桡骨骨折切开复位钢板内固定术;桡骨外固定术
14204	O209手外科	2024-12-21	2024-12-25	3584159	范定钢	1	22Y	掌骨骨折		治愈	陈星隆	李士	陈一衡	掌骨骨折切开复位钢板内固定术
14205	O209手外科	2024-12-22	2024-12-27	3584946	舒诚坤	1	49Y	取除骨折内固定装置	脂肪肝;肝钙化灶;特发性肺纤维化	其他	陈星隆	陈一衡	蔡海丰	指骨内固定装置去除术;皮肤瘢痕切除术
14206	O209手外科	2024-12-24	2024-12-27	3584949	曾雪平	2	49Y	掌骨骨折		治愈	陈星隆	李士	蔡海丰	掌骨骨折切开复位钢板内固定术
14207	O209手外科	2024-12-23	2024-12-27	3584972	杨鸳然	2	65Y	胸椎骨折T11/T12	骨质疏松;乳房恶性肿瘤个人史;脂肪肝;下肢动脉粥样硬化	治愈	黄其杉	吴爱悯	吴爱悯	胸椎骨折球囊扩张成形术;经皮椎骨成形术
14208	O209手外科	2024-12-18	2024-12-28	3585165	钟礼松	1	44Y	指神经损伤	在腕和手水平的肌肉和肌腱的损伤;腕骨骨折;手指多处骨折;手部肌肉损伤;手指血管损伤,其他的;创伤性骨筋膜室综合征;手指开放性伤口伴有指甲损害;肺气肿合并肺大泡;肺肿物;肾盂囊肿;肾结石;前列腺结石	治愈	闫合德	周飞亚	周飞亚	指神经吻合术;正中神经松解术;尺神经松解术;筋膜间隙切开减压术;甲床清创术;皮瓣修整术;皮肤和皮下组织非切除性清创
14209	O209手外科	2024-12-23	2024-12-28	3585301	周梅英	2	62Y	骨质疏松伴有病理性骨折，其他的	腰椎骨折L3;腰椎骨折L2;胸椎骨折T9/T10;脾术后	治愈	黄其杉	吴爱悯	吴爱悯	腰椎骨折球囊扩张成形术;经皮椎骨成形术;胸椎骨折球囊扩张成形术
14210	O209手外科	2024-12-20	2024-12-29	3585680	郑和芬	2	37Y	创伤性指动脉破裂	指神经损伤;手指骨折，其他的;腕和手指屈肌腱损伤;腕和手指伸肌腱损伤;手指开放性伤口不伴有指甲损害	治愈	陈星隆	李士	蔡海丰	指动脉缝合术;指神经缝合术;指骨骨折切开复位钢针内固定术;指骨人工骨植骨术;屈指肌腱缝合术;伸指肌腱缝合术;手带蒂皮瓣移植术
14211	O209手外科	2024-12-26	2024-12-29	3585681	罗文杰	1	54Y	指神经损伤	腕掌关节脱位;掌骨骨折;手指血管损伤,其他的;手掌韧带断裂;腕和手指屈肌腱损伤;腕和手指伸肌腱损伤;特发性(原发性)高血压;2型糖尿病;脂肪肝;胆囊结石;肾结石;前列腺结石	治愈	陈星隆	陈一衡	蔡海丰	指神经吻合术;掌骨骨折切开复位钢针内固定术;腕掌关节脱位切开复位术;韧带修补术;掌骨人工骨植骨术;屈指肌腱缝合术;伸指肌腱缝合术
14212	O209手外科	2024-12-21	2024-12-30	3586036	郑方辉	1	53Y	肱骨骨折不连接	主动脉(瓣)关闭不全;肺肿物;肾结石;2型糖尿病;心功能不全	治愈	陈星隆	李士	蔡海丰	肱骨植骨术;髂骨切除术用作移植物;肱骨病损切除术;桡神经松解术
14213	O209手外科	2024-12-20	2024-12-30	3586154	候金新	1	52Y	创伤性指动脉破裂	手部尺神经损伤;手部桡神经损伤;开放性指骨骨折;指间关节脱位;腕和手指屈肌腱损伤;含硅［矽］粉尘引起的肺尘埃沉着病，其他的;肺大疱	治愈	李志杰	李士	蔡海丰	指动脉缝合术;指骨骨折切开复位钢针内固定术;指骨人工骨植骨术;指关节脱位切开复位术;上肢肌屈指功能重建伴肌移位术;手带蒂皮瓣移植术;尺神经吻合术;桡神经吻合术
14214	O209手外科	2024-12-23	2024-12-31	3586509	林志华	1	56Y	胸椎骨折T11/T12	椎管狭窄;腰椎骨折L1;创伤性硬脑膜外出血;创伤性硬膜下出血;创伤性蛛网膜下出血;肋骨骨折;肺挫伤;高血压;脂肪肝	治愈	黄其杉	吴爱悯	吴爱悯	胸椎骨折切开复位内固定术;经皮椎弓根钉内固定术
14215	O209手外科	2024-12-26	2024-12-31	3586510	陈祖良	1	42Y	开放性拇指骨折	拇指开放性损伤伴指甲损伤;特发性(原发性)高血压;前列腺结石;肾结石;前列腺囊肿	治愈	陈星隆	陈一衡	蔡海丰	指骨骨折切开复位钢针内固定术;手带蒂皮瓣移植术;甲床清创术
14216	O209手外科	2024-12-23	2024-12-31	3586514	马显叠	1	35Y	单指不全切断	开放性指骨骨折;手指开放性伤口伴有指甲损害;脂肪肝	治愈	闫合德	吴志鹏	吴志鹏	手指断指再植术;指神经吻合术;指动脉缝合术;用其他类型补片移植物的血管修补术;甲成形术;皮肤和皮下组织非切除性清创
14217	O209手外科	2024-12-26	2024-12-31	3586606	李来会	1	24Y	开放性指骨骨折	肺肿物;二尖瓣反流;脂肪肝;肝钙化灶;前列腺结石;心功能不全	治愈	陈星隆	陈一衡	蔡海丰	手带蒂皮瓣移植术;甲床清创术
14218	O209手外科	2024-12-28	2024-12-31	3586663	武玉国	1	48Y	开放性指骨骨折	手指挤压伤;手指开放性伤口伴有指甲损害;脂肪肝	治愈	闫合德	周飞亚	周飞亚	指骨骨折切开复位钢针内固定术;残端皮肤修整术
14219	O210脊柱外科	2025-04-24	2025-04-27	3496913	蔡秋凤	2	71Y	胸椎骨折	骨质疏松;脂肪肝;胆囊结石	治愈	武垚森	武垚森	武垚森	胸椎骨折球囊扩张成形术
14220	O210脊柱外科	2025-04-26	2025-04-30	3497844	黄唐妹	2	58Y	腰椎骨折	腰椎间盘突出;胸椎椎管狭窄;腰椎椎管狭窄;骨质疏松;糖尿病	治愈	王向阳	盛孙仁	朱思品	腰椎骨折球囊扩张成形术
14221	O210脊柱外科	2025-04-30	2025-05-01	3498099	曾兰	2	85Y	腰椎骨折	骨质疏松;高血压;心房颤动;陈旧性心肌梗死	好转	黄其杉	田乃锋	周凯亮
14222	O210脊柱外科	2025-04-29	2025-05-01	3498123	孙秀兰	2	57Y	胸椎骨折	腰椎骨折;骨质疏松;脂肪肝	治愈	倪文飞	吴爱悯	陈泽新	经皮穿刺脊柱后凸成形术
14223	O210脊柱外科	2025-04-28	2025-05-02	3498260	林文兰	2	74Y	腰椎骨折	骨质疏松;干燥综合征\[舍格伦\];高血压;糖尿病	治愈	倪文飞	吴爱悯	吴爱悯	腰椎骨折球囊扩张成形术
14224	O210脊柱外科	2025-05-01	2025-05-03	3498424	李玉花	2	70Y	腰椎骨折	腰背部挫伤;硬膜外出血;腰椎不稳定;腰椎退行性病变;桡骨远端骨折;骨质疏松;脂肪肝;高血压;椎管内囊肿	治愈	黄其杉	田乃锋	周凯亮	腰椎骨折球囊扩张成形术
14225	O210脊柱外科	2025-04-24	2025-05-04	3498633	戴海彬	1	47Y	取除骨折内固定装置		其他	倪文飞	吴爱悯	吴爱悯	脊柱内固定装置去除术
14226	O210脊柱外科	2025-04-27	2025-05-04	3498674	巨阿畴	2	72Y	胸椎骨折	桡骨远端骨折;腰椎间盘突出;胸椎退行性病变;腰椎退行性病变;骨质疏松;肺诊断性影像检查的异常所见;脂肪肝;肝钙化灶;胆囊结石;后天性肾囊肿;异位肾;腹部区域诊断性影像检查的异常所见(包括腹膜后腔)，其他的	治愈	黄其杉	田乃锋	周凯亮	胸椎骨折球囊扩张成形术
14227	O210脊柱外科	2025-04-28	2025-05-05	3498884	项玉凤	2	54Y	胸椎骨折	骨质疏松;腰椎前移;腰椎椎管狭窄;高血压;糖尿病	治愈	徐晖	徐晖	陈泽新	胸椎骨折球囊扩张成形术
14228	O210脊柱外科	2025-04-26	2025-05-05	3498912	张香蕊	2	70Y	颈部脊髓损伤	颈椎间盘突出;颈椎骨折;颈椎椎管狭窄;颈椎后纵韧带骨化;胸腔积液;肝囊肿;下肢动脉粥样硬化;下肢静脉血栓形成	好转	黄其杉	田乃锋	周凯亮	颈椎后路单开门椎管减压术
14229	O210脊柱外科	2025-04-30	2025-05-06	3499173	管绿竹	2	65Y	腰椎骨折	骨质疏松;胸椎退行性病变;腰椎退行性病变;肺诊断性影像检查的异常所见;下肢动脉粥样硬化;高血压;主动脉硬化;冠状动脉粥样硬化	治愈	黄其杉	田乃锋	周凯亮	腰椎骨折球囊扩张成形术
14230	O210脊柱外科	2025-05-04	2025-05-06	3499177	胡志钮	1	71Y	颈椎骨折	胸椎多处骨折;头皮血肿;后天性肾囊肿	好转	倪文飞	吴爱悯	吴爱悯
14231	O210脊柱外科	2025-04-27	2025-05-08	3499680	周宝玉	2	54Y	腰椎骨折L2		治愈	倪文飞	吴爱悯	吴爱悯	腰椎骨折切开复位内固定术
14232	O210脊柱外科	2025-05-05	2025-05-08	3499692	陈米河	2	70Y	胸椎多处骨折	颈椎骨折;骨质疏松;胸椎退行性病变;腰椎退行性病变;脂肪肝;胆囊息肉;肾结石;高血压;糖尿病	治愈	黄其杉	田乃锋	周凯亮	胸椎骨折球囊扩张成形术
14233	O210脊柱外科	2025-05-04	2025-05-08	3499694	曹银娇	2	83Y	胸椎骨折	胸椎退行性病变;腰椎退行性病变;后天性肾囊肿;脂肪肝;肝囊肿;胆囊息肉;下肢动脉粥样硬化;下肢动脉粥样硬化闭塞症;肺部感染;肺气肿合并肺大泡;肺诊断性影像检查的异常所见	治愈	黄其杉	田乃锋	周凯亮	胸椎骨折球囊扩张成形术
14234	O210脊柱外科	2025-04-30	2025-05-08	3499695	李井云	2	69Y	腰椎骨折	腰椎椎管狭窄;腰椎退行性病变;肾结石;糖尿病;抑郁状态;帕金森病	治愈	武垚森	徐晖	陈泽新	腰椎骨折切开复位内固定术;椎骨内固定术;腰椎椎板切除减压术;黄韧带部分切除术
14235	O210脊柱外科	2025-05-04	2025-05-09	3499969	任娟弟	2	68Y	胸椎骨折	骨质疏松;腰椎间盘突出;肺大疱;肺诊断性影像检查的异常所见;糖尿病	治愈	田乃锋	田乃锋	周凯亮	胸椎骨折球囊扩张成形术
14236	O210脊柱外科	2025-05-04	2025-05-11	3500370	夏银花	2	74Y	胸椎骨折	骨质疏松;胆囊息肉;后天性肾囊肿	治愈	倪文飞	吴爱悯	吴爱悯	经皮穿刺脊柱后凸成形术;椎骨活组织检查
14237	O210脊柱外科	2025-04-27	2025-05-11	3500373	缪克倍	1	66Y	颈部脊髓损伤	颈椎间盘突出;颈椎多处骨折;血管瘤;颈椎退行性病变;肝回声不均;胸腔积液	好转	黄其杉	黄其杉	周凯亮	前入路颈椎融合术;椎体切除术伴椎间盘切除术;2-3个椎骨融合或再融合;金属脊椎融合物置入术
14238	O210脊柱外科	2025-05-04	2025-05-11	3500375	林孝宣	1	54Y	腰椎骨折	腰椎间盘变性;腰椎间盘突出;胆囊息肉;前列腺结石	治愈	倪文飞	吴爱悯	吴爱悯	腰椎骨折切开复位内固定术
14239	O210脊柱外科	2025-05-07	2025-05-12	3500692	张爱华	2	57Y	取除骨折内固定装置		其他	倪文飞	吴爱悯	吴爱悯	脊柱内固定装置去除术
14240	O210脊柱外科	2025-05-07	2025-05-13	3501011	陈细华	1	54Y	病理性骨折，不可归类在他处者	胸椎退行性病变;腰椎退行性病变;矽肺;慢性支气管炎;肺气肿;肺诊断性影像检查的异常所见;陈旧性肺结核;肝囊肿;胆囊结石	好转	徐晖	徐晖	陈泽新	椎骨活组织检查
14241	O210脊柱外科	2025-05-05	2025-05-13	3501014	杨凯	1	21Y	腰椎骨折	腰椎椎管狭窄	治愈	倪文飞	吴爱悯	吴爱悯	腰椎骨折切开复位内固定术;腰椎椎板切除减压术
14242	O210脊柱外科	2025-05-08	2025-05-14	3501338	麻中宙	1	75Y	颈椎骨折	颈椎间盘突出;胸椎骨折;糖尿病;老年性心脏病;前列腺增生	好转	田乃锋	田乃锋	周凯亮
14243	O210脊柱外科	2025-05-08	2025-05-14	3501340	陈春兰	2	67Y	腰椎骨折	骨质疏松;高血压;脂肪肝;肝囊肿;后天性肾囊肿	治愈	倪文飞	吴爱悯	吴爱悯	腰椎骨折切开复位内固定术;椎骨内固定术
14244	O210脊柱外科	2025-05-13	2025-05-16	3502074	夏玉仙	2	94Y	腰椎骨折	骨质疏松;胆囊结石;后天性肾囊肿	治愈	倪文飞	吴爱悯	吴爱悯	腰椎骨折球囊扩张成形术
14245	O210脊柱外科	2025-05-09	2025-05-17	3502253	刘志坚	1	51Y	肿瘤性病理性骨折	肝恶性肿瘤;脊柱继发恶性肿瘤;肋骨继发恶性肿瘤;肾上腺继发性恶性肿瘤;肺继发恶性肿瘤;截瘫[双下肢瘫痪];高血压;糖尿病;胸椎术后;肝术后	好转	黄其杉	田乃锋	周凯亮	腰椎骨折球囊扩张成形术
14246	O210脊柱外科	2025-05-10	2025-05-18	3502492	李理林	1	64Y	取除骨折内固定装置	肺诊断性影像检查的异常所见;后天性肾囊肿;前列腺结石	其他	林焱	许聪	许聪	脊柱内固定装置去除术
14247	O210脊柱外科	2025-05-09	2025-05-18	3502498	黄文庆	1	32Y	胸椎骨折	皮肤挫伤;肝囊肿	好转	林焱	许聪	许聪	胸椎骨折切开复位内固定术
14248	O210脊柱外科	2025-05-12	2025-05-18	3502509	胡贤周	1	61Y	取除骨折内固定装置	高血压;脂肪肝;后天性肾囊肿;下肢动脉粥样硬化;肺气肿合并肺大泡;胆囊结石;慢性左心功能不全;慢性乙型病毒性肝炎	其他	田乃锋	田乃锋	周凯亮	脊柱内固定装置去除术
14249	O210脊柱外科	2025-05-14	2025-05-18	3502511	徐慧蓉	2	63Y	胸椎骨折	骨质疏松;糖尿病;乙型病毒性肝炎;肺部感染;胸椎退行性病变;腰椎退行性病变;脂肪肝;胆囊结石;后天性肾囊肿	治愈	徐晖	徐晖	陈泽新	胸椎骨折球囊扩张成形术
14250	O210脊柱外科	2025-05-12	2025-05-18	3502517	杨爱菊	2	54Y	胸椎骨折	脊椎前移;腰椎峡部裂;腰椎退行性病变;腰椎间盘突出;胸腔积液;慢性左心功能不全;慢性乙型病毒性肝炎	治愈	田乃锋	田乃锋	周凯亮	胸椎骨折球囊扩张成形术
14251	O210脊柱外科	2025-05-14	2025-05-18	3502521	高湘凤	2	74Y	腰椎骨折	腰椎退行性病变;腰椎间盘突出;泌尿道感染;下肢动脉粥样硬化;高血压;老年性心脏瓣膜病;肝囊肿;后天性肾囊肿	治愈	黄其杉	黄其杉	周凯亮	腰椎骨折球囊扩张成形术
14252	O210脊柱外科	2025-05-05	2025-05-19	3502867	张学峰	1	28Y	腰椎骨折L2	腰椎椎管狭窄;腰椎间盘突出;脂肪肝;后天性肾囊肿;前列腺结石	好转	田乃锋	田乃锋	周凯亮	腰椎骨折切开复位内固定术
14253	O210脊柱外科	2025-05-12	2025-05-20	3503096	蓝建强	1	32Y	取除骨折内固定装置	肝回声不均;前列腺结石;慢性乙型病毒性肝炎	其他	田乃锋	田乃锋	周凯亮	脊柱内固定装置去除术
14254	O210脊柱外科	2025-05-13	2025-05-20	3503172	李芳钗	2	71Y	多发性腰椎骨折	骨质疏松;肝回声不均;肝钙化灶;下肢动脉粥样硬化;肺诊断性影像检查的异常所见	治愈	徐晖	徐晖	陈泽新	腰椎骨折球囊扩张成形术
14255	O210脊柱外科	2025-05-13	2025-05-20	3503176	陈兰香	2	78Y	胸椎骨折	骨质疏松;脊椎前移;胸椎退行性病变;胸椎退行性病变;心房颤动;肺动脉高压;下肢动脉粥样硬化;下肢静脉血栓形成	治愈	徐晖	徐晖	陈泽新	胸椎骨折球囊扩张成形术
14256	O210脊柱外科	2025-04-28	2025-05-20	3503178	袁富德	1	51Y	胸椎多处骨折	腰椎压缩性骨折;颈椎骨折;创伤性湿肺;胸椎退行性病变;腰椎退行性病变;陈旧性颅骨骨折;窦性心动过缓;肾结石;腰椎间盘突出	好转	徐晖	徐晖	陈泽新	脊椎骨折切开复位内固定术
14257	O210脊柱外科	2025-05-13	2025-05-20	3503186	徐菊花	2	86Y	骨质疏松伴有病理性骨折	糖尿病;房性期前收缩[房性早搏];下肢动脉粥样硬化;下肢动脉粥样硬化闭塞症;肺部感染;胸腔积液;胸椎退行性病变;腰椎退行性病变;肝回声不均;胆总管扩张;后天性肾囊肿;肺钙化;主动脉钙化;冠状动脉粥样硬化;陈旧性肋骨骨折	治愈	徐晖	徐晖	陈泽新	胸椎骨折球囊扩张成形术
14258	O210脊柱外科	2025-05-18	2025-05-21	3503559	吴丽珠	2	64Y	胸椎骨折	胸椎间盘突出;腰椎退行性病变;胸椎退行性病变;肺大疱;高血压;冠状动脉粥样硬化;下肢动脉粥样硬化;脂肪肝	治愈	田乃锋	田乃锋	周凯亮	胸椎骨折球囊扩张成形术
14259	O210脊柱外科	2025-05-12	2025-05-22	3503918	周万瑞	1	26Y	腰椎骨折	脂肪肝	治愈	倪文飞	吴爱悯	吴爱悯	腰椎骨折切开复位内固定术
14260	O210脊柱外科	2025-05-18	2025-05-22	3503920	朱美菊	2	86Y	胸椎骨折	骨质疏松;胸椎后凸;脊椎退行性病变;腰椎术后;室性期前收缩;轻度肺动脉高压;主动脉钙化;冠状动脉粥样硬化;下肢动脉粥样硬化;肺诊断性影像检查的异常所见	治愈	徐晖	徐晖	陈泽新	胸椎骨折球囊扩张成形术
14261	O210脊柱外科	2025-05-18	2025-05-23	3504204	彭涛	1	20Y	取除骨折内固定装置	骨质增生;肝回声不均	其他	田乃锋	田乃锋	周凯亮	脊柱内固定装置去除术
14262	O210脊柱外科	2025-05-19	2025-05-23	3504211	支绍云	1	86Y	骨质疏松伴有病理性骨折	腰椎间盘突出;脊椎退行性病变;胸椎术后;慢性支气管炎急性发作;高血压;结肠恶性肿瘤个人史;后天性肾囊肿;前列腺增生;前列腺结石;下肢动脉粥样硬化;肺气肿;老年性心脏瓣膜病	好转	田乃锋	田乃锋	周凯亮	胸椎骨折球囊扩张成形术
14263	O210脊柱外科	2025-05-18	2025-05-23	3504244	刘香云	2	68Y	胸椎骨折	腰椎骨折;骨质疏松;下肢动脉粥样硬化;胆囊结石;食管裂孔疝	治愈	倪文飞	吴爱悯	吴爱悯	经皮穿刺脊柱后凸成形术
14264	O210脊柱外科	2025-05-14	2025-05-25	3504749	刘必伟	1	48Y	脊髓型颈椎病	颈椎间盘突出;脊椎退行性病变;骨折术后;肝回声不均;前列腺结石;下肢动脉粥样硬化	治愈	黄其杉	黄其杉	周凯亮	前入路颈椎融合术;椎体切除术伴椎间盘切除术;2-3个椎骨融合或再融合;金属脊椎融合物置入术
14265	O210脊柱外科	2025-05-22	2025-05-25	3504750	姜荷花	2	72Y	骨质疏松伴有病理性骨折	腰椎退行性病变;脑卒中后遗症;高血压;老年性心脏病;下肢动脉粥样硬化;肺诊断性影像检查的异常所见;肝钙化灶	治愈	田乃锋	田乃锋	周凯亮	腰椎骨折球囊扩张成形术
14266	O210脊柱外科	2025-05-13	2025-05-25	3504756	郑陈香	2	79Y	腰椎骨折	腰椎间盘突出;骨质疏松;脊椎退行性病变;脊柱侧弯;肺诊断性影像检查的异常所见;脂肪肝;下肢动脉粥样硬化;心功能不全;肝内胆管积气	治愈	倪文飞	吴爱悯	吴爱悯	腰椎骨折切开复位内固定术;椎骨内固定术
14267	O210脊柱外科	2025-05-19	2025-05-25	3504758	邹佐妹	2	76Y	胸椎骨折	骨质疏松;肺诊断性影像检查的异常所见;腰椎退行性病变;胸椎退行性病变;下肢动脉粥样硬化;下肢静脉曲张;心脏肥大;退行性主动脉瓣疾患;二尖(瓣)关闭不全;心功能不全;后天性肾囊肿	治愈	倪文飞	吴爱悯	吴爱悯	经皮穿刺脊柱后凸成形术
14268	O210脊柱外科	2025-05-18	2025-05-26	3505070	廖美丽	2	55Y	胸椎骨折	腰椎间盘突出;腰椎退行性病变	好转	黄其杉	黄其杉	周凯亮	胸椎骨折切开复位内固定术
14269	O210脊柱外科	2025-05-21	2025-05-26	3505075	黄香华	2	53Y	取除骨折内固定装置	脂肪肝;胆囊结石;脾大;高血压	其他	田乃锋	田乃锋	周凯亮	脊柱内固定装置去除术
14270	O210脊柱外科	2025-05-19	2025-05-26	3505079	周清鹤	2	39Y	取除骨折内固定装置	下肢静脉曲张	其他	倪文飞	吴爱悯	吴爱悯	脊柱内固定装置去除术
14271	O210脊柱外科	2025-05-14	2025-05-27	3505337	马红永	1	22Y	取除骨折内固定装置	肝钙化灶;特发性肺纤维化	其他	徐晖	徐晖	陈泽新	脊柱内固定装置去除术
14272	O210脊柱外科	2025-05-20	2025-05-27	3505433	陈玉美	2	82Y	病理性骨折，不可归类在他处者	肌肉骨骼系统其他部位诊断性影像检查的异常所见;腰椎间盘突出;胸椎术后;下肢动脉粥样硬化;老年性心脏瓣膜病	好转	黄其杉	黄其杉	周凯亮	腰椎骨折球囊扩张成形术
14273	O210脊柱外科	2025-05-15	2025-05-27	3505435	曾瑞献	1	49Y	腰椎骨折	腰椎椎管狭窄;腰椎间盘突出;坠积性肺炎;肺结核	治愈	田乃锋	田乃锋	周凯亮	腰椎椎体间融合术，后入路;后入路腰椎间盘切除术;金属脊椎融合物置入术;2-3个椎骨融合或再融合;黄韧带部分切除术;腰椎植骨术
14274	O210脊柱外科	2025-05-12	2025-05-27	3505438	吴金珠	2	58Y	骨质疏松伴有病理性骨折	胸椎椎管狭窄;腰椎椎管狭窄;高血压;胆囊结石;下肢动脉粥样硬化;肾结石;肺诊断性影像检查的异常所见;退行性主动脉瓣疾患;主动脉(瓣)关闭不全;心功能不全	好转	倪文飞	吴爱悯	吴爱悯	脊椎骨折切开复位内固定术;椎骨内固定术
14275	O210脊柱外科	2025-05-11	2025-05-27	3505452	卿明泽	1	46Y	胸椎多处骨折	颈椎多处骨折;胸椎椎管狭窄;肩胛骨骨折;肋骨多处骨折;肺挫伤;肝功能检查的异常结果;颈椎间盘突出;多发性肝囊肿;脾囊肿;后天性肾囊肿;椎管内囊肿	治愈	倪文飞	吴爱悯	吴爱悯	胸椎骨折切开复位内固定术
14276	O210脊柱外科	2025-05-24	2025-05-28	3505731	汤彩莲	2	82Y	胸椎骨折	胸椎退行性病变;颈椎间盘突出;颈椎退行性病变;高血压;后天性肾囊肿;老年性心脏瓣膜病	好转	黄其杉	黄其杉	周凯亮	胸椎骨折球囊扩张成形术
14277	O210脊柱外科	2025-05-20	2025-05-28	3505735	朱兆军	1	55Y	取除骨折内固定装置	高血压;脂肪肝;下肢动脉粥样硬化;特发性肺纤维化	其他	徐晖	徐晖	陈泽新	脊柱内固定装置去除术
14278	O210脊柱外科	2025-05-22	2025-05-28	3505737	张德英	2	71Y	腰椎骨折	骨质疏松;脊椎退行性病变;脊柱血管瘤;肋骨骨折;高血压;糖尿病;肺的其他疾患;肾错构瘤	治愈	徐晖	徐晖	陈泽新	腰椎骨折球囊扩张成形术
14279	O210脊柱外科	2025-05-20	2025-05-28	3505759	朱景波	1	81Y	骨质疏松伴有病理性骨折	脊柱术后;肺气肿;下肢静脉血栓形成;脊椎退行性病变;脂肪瘤;后天性肾囊肿	治愈	徐晖	徐晖	陈泽新	腰椎骨折球囊扩张成形术
14280	O210脊柱外科	2025-05-24	2025-05-29	3506014	傅华招	2	69Y	胸椎骨折	骨质疏松;高血压;三叉神经痛;胆囊息肉;心脏和冠状循环诊断性影像检查的异常所见;心功能不全	治愈	倪文飞	吴爱悯	吴爱悯	经皮穿刺脊柱后凸成形术;椎骨活组织检查
14281	O210脊柱外科	2025-05-25	2025-05-29	3506075	杜丽珠	2	60Y	腰椎骨折	骨质疏松;腰椎退行性病变;胸椎退行性病变;颈椎间盘突出;肺诊断性影像检查的异常所见;下肢动脉粥样硬化;脂肪肝;退行性主动脉瓣疾患;主动脉(瓣)关闭不全;心功能不全	治愈	倪文飞	吴爱悯	吴爱悯	腰椎骨折球囊扩张成形术;椎骨活组织检查
14282	O210脊柱外科	2025-05-21	2025-05-30	3506318	舒良金	1	66Y	胸椎多处骨折	颈椎骨折;骨质疏松;脊椎退行性病变;肺大疱;后天性肾囊肿;胆囊胆固醇沉着症	治愈	徐晖	徐晖	陈泽新	胸椎骨折球囊扩张成形术
14283	O210脊柱外科	2025-05-26	2025-05-30	3506358	蔡玉姐	2	79Y	病理性骨折，不可归类在他处者	腰椎间盘突出;腰椎退行性病变;肺诊断性影像检查的异常所见;肺部感染;胆囊术后;下肢动脉粥样硬化;老年性心脏瓣膜病;高血压	好转	黄其杉	黄其杉	周凯亮	胸椎骨折球囊扩张成形术
14284	O210脊柱外科	2025-05-25	2025-06-01	3506805	陈香弟	2	65Y	腰椎骨折	浆细胞骨髓瘤[浆细胞瘤];骨质疏松;腰椎术后;腰椎退行性病变;腰椎后凸;肺部阴影;特发性肺纤维化;冠状动脉粥样硬化;诊断性影像检查的异常所见，其他特指身体结构的;老年性心脏病;施莫尔结	好转	倪文飞	吴爱悯	吴爱悯	腰椎骨折球囊扩张成形术
14285	O210脊柱外科	2025-05-23	2025-06-01	3506821	刘乐彬	1	41Y	腰椎骨折	腰背部挫伤;坠积性肺炎;脊椎退行性病变;肺部阴影	治愈	徐晖	徐晖	陈泽新	腰椎骨折切开复位内固定术;腰椎后柱融合术，后入路;腰椎植骨术;2-3个椎骨融合或再融合
14286	O210脊柱外科	2025-05-28	2025-06-02	3507140	张宣玉	2	65Y	胸椎骨折	骨质疏松;脊椎退行性病变;脂肪肝;胆囊息肉;胆囊胆固醇沉着症;输尿管囊肿	治愈	徐晖	徐晖	陈泽新	胸椎骨折球囊扩张成形术
14287	O210脊柱外科	2025-05-22	2025-06-02	3507239	项有银	1	82Y	腰椎骨折	骨质疏松;腰椎退行性病变;高血压;脑梗死后遗症;心功能不全;具有心脏起搏器;肝囊肿;胆囊结石;下肢动脉粥样硬化;肺部阴影;前列腺结石;肾结石	治愈	徐晖	徐晖	陈泽新	腰椎骨折球囊扩张成形术
14288	O210脊柱外科	2025-05-26	2025-06-03	3507514	金飞华	2	52Y	取除骨折内固定装置	肝回声不均;肾超声检查异常	其他	倪文飞	吴爱悯	吴爱悯	脊柱内固定装置去除术
14289	O210脊柱外科	2025-05-29	2025-06-05	3508222	陈秀琴	2	47Y	胸椎骨折	胸椎椎管狭窄;胸椎多处骨折;腰椎退行性病变	治愈	田乃锋	田乃锋	周凯亮	胸椎骨折切开复位内固定术;胸椎植骨术
14290	O210脊柱外科	2025-05-28	2025-06-05	3508254	朱日汉	1	64Y	腰椎骨折L1	高血压;脂肪肝;肝囊肿;后天性肾囊肿;肾结石;前列腺增生;前列腺结石;老年性心脏瓣膜病	治愈	田乃锋	田乃锋	周凯亮	腰椎骨折切开复位内固定术
14291	O210脊柱外科	2025-05-25	2025-06-05	3508255	庄丽君	1	58Y	多发性腰椎骨折	胸椎多处骨折;四根以上肋骨骨折不伴第一肋骨骨折;肺挫伤;先天性心包囊肿;前列腺结石	治愈	黄其杉	黄其杉	周凯亮	腰椎骨折球囊扩张成形术
14292	O210脊柱外科	2025-06-02	2025-06-05	3508312	金淑眉	2	85Y	骨质疏松伴有病理性骨折	腰椎术后;下肢动脉粥样硬化	好转	倪文飞	吴爱悯	吴爱悯	腰椎骨折球囊扩张成形术
14293	O210脊柱外科	2025-06-03	2025-06-06	3508529	李文英	2	94Y	骨质疏松伴有病理性骨折	胸椎术后;腰椎术后;胸椎退行性病变;脊柱侧弯;陈旧性肋骨骨折;高血压;脂肪肝;后天性肾囊肿;下肢动脉粥样硬化;主动脉钙化;冠状动脉粥样硬化	治愈	田乃锋	田乃锋	周凯亮	胸椎骨折球囊扩张成形术
14294	O210脊柱外科	2025-06-04	2025-06-06	3508571	林春兰	2	60Y	腰椎骨折	腰椎间盘变性;肺炎;肺诊断性影像检查的异常所见;多发性肝囊肿;脊柱骨软骨病;胸部挫伤	治愈	倪文飞	吴爱悯	吴爱悯	腰椎骨折球囊扩张成形术
14295	O210脊柱外科	2025-06-01	2025-06-08	3509031	吴秀华	2	75Y	腰椎骨折	胸椎术后;腰椎术后;腰骶椎间盘突出;胸椎退行性病变;腰椎退行性病变;肺部阴影;老年性心脏瓣膜病;老年性骨质疏松	好转	黄其杉	黄其杉	周凯亮	经皮椎骨成形术
14296	O210脊柱外科	2025-05-24	2025-06-08	3509037	曹银娇	2	83Y	骨质疏松伴有病理性骨折	胸椎术后;腰骶椎间盘突出;腰椎退行性病变;胸腔积液;后天性肾囊肿	治愈	田乃锋	田乃锋	周凯亮	胸椎骨折球囊扩张成形术
14297	O210脊柱外科	2025-05-27	2025-06-08	3509042	凌爱琴	2	57Y	胸椎骨折	脊髓损伤;2型糖尿病	治愈	倪文飞	吴爱悯	吴爱悯	胸椎骨折切开复位内固定术;椎管减压术
14298	O210脊柱外科	2025-06-06	2025-06-10	3509814	李利蕊	2	70Y	胸椎骨折	骨质疏松;脊椎退行性病变;糖尿病;高血压;脂肪肝;后天性肾囊肿	治愈	徐晖	徐晖	陈泽新	胸椎骨折球囊扩张成形术
14299	O210脊柱外科	2025-06-04	2025-06-10	3509831	潘笋芽	2	75Y	骨质疏松伴有病理性骨折	胸椎术后;腰椎术后;胸椎椎管狭窄;腰椎退行性病变;高血压;肺部阴影;胆囊结石;脂肪肝;后天性肾囊肿;肾结石	治愈	徐晖	徐晖	陈泽新	腰椎骨折球囊扩张成形术
14300	O210脊柱外科	2025-05-28	2025-06-10	3509838	张泽	1	47Y	胸椎多处骨折	胸椎椎管狭窄;马尾综合征;脊椎退行性病变;腰骶椎间盘突出;创伤性湿肺;肺部感染;肺气肿;听力减退;外耳道肉芽肿;肝回声不均	治愈	徐晖	徐晖	陈泽新	脊椎骨折切开复位内固定术;胸椎椎板切除减压术;胸椎植骨术
14301	O210脊柱外科	2025-05-25	2025-06-11	3510142	陈根明	1	71Y	颈椎椎管狭窄	颈椎不稳定;老年性心脏病;肝内钙化点;陈旧性肺结核;单侧或未特指的腹股沟疝，不伴有梗阻或坏疽;肺气肿合并肺大泡;陈旧性肋骨骨折;主动脉瓣钙化;主动脉钙化;肝钙化灶	治愈	倪文飞	吴爱悯	吴爱悯	颈椎后路单开门椎管减压术;黄韧带部分切除术;椎骨内固定术
14302	O210脊柱外科	2025-06-06	2025-06-11	3510157	王雪眉	2	65Y	腰椎骨折	骨质疏松;脊椎退行性病变;脑梗死;肺部阴影;脂肪肝;后天性肾囊肿;肾结石;子宫平滑肌瘤;高血压	治愈	徐晖	徐晖	陈泽新	腰椎骨折球囊扩张成形术
14303	O210脊柱外科	2025-06-05	2025-06-12	3510455	郑新夫	1	58Y	胸椎骨折	肝囊肿;前列腺增生;前列腺结石	治愈	王向阳	盛孙仁	朱思品	胸椎骨折球囊扩张成形术
14304	O210脊柱外科	2025-06-03	2025-06-12	3510557	陈天宋	1	78Y	骨质疏松伴有病理性骨折	腰椎退行性病变;下肢动脉粥样硬化;前列腺结石;前列腺增生;老年性心脏病	治愈	倪文飞	吴爱悯	吴爱悯	腰椎骨折球囊扩张成形术
14305	O210脊柱外科	2025-06-08	2025-06-12	3510559	潘慧微	2	48Y	取除骨折内固定装置	胆囊结石;下肢动脉粥样硬化;脂肪肝	其他	黄其杉	黄其杉	周凯亮	脊柱内固定装置去除术
14306	O210脊柱外科	2025-06-05	2025-06-12	3510560	庄利淑	2	34Y	取除骨折内固定装置	肺部阴影	其他	黄其杉	黄其杉	周凯亮	脊柱内固定装置去除术
14307	O210脊柱外科	2025-06-06	2025-06-12	3510659	李秀清	2	54Y	胸椎骨折	颈部脊髓损伤;颈椎骨折C6;骨质疏松;脊椎退行性病变;颈部挫伤;清创术后;多处挫伤;肝囊肿;胆囊息肉;肾结石	治愈	徐晖	徐晖	陈泽新	胸椎骨折球囊扩张成形术
14308	O210脊柱外科	2025-06-07	2025-06-13	3510870	郑陈爱	2	66Y	胸椎骨折	骨质疏松;脊椎退行性病变;肺部阴影;肺病;肝囊肿	治愈	徐晖	徐晖	陈泽新	胸椎骨折球囊扩张成形术
14309	O210脊柱外科	2025-06-11	2025-06-15	3511475	叶美钗	2	79Y	腰椎骨折	腰椎间盘突出;腰椎退行性病变;高血压;糖尿病;胆囊结石;肾结石;下肢动脉粥样硬化;老年性心脏瓣膜病	治愈	黄其杉	黄其杉	周凯亮	腰椎骨折球囊扩张成形术
14310	O210脊柱外科	2025-06-10	2025-06-15	3511479	叶其昌	1	73Y	腰椎骨折	骨质疏松;高血压;肺气肿;肺部阴影;脊椎退行性病变;脂肪肝;老年性心脏瓣膜病	治愈	徐晖	徐晖	陈泽新	腰椎骨折球囊扩张成形术
14311	O210脊柱外科	2025-06-10	2025-06-16	3511711	黄阿彩	2	69Y	胸椎骨折		治愈	毛方敏	毛方敏	万峻莱	胸椎骨折球囊扩张成形术
14312	O210脊柱外科	2025-06-02	2025-06-16	3511786	陈定兰	2	51Y	颈椎多处骨折	蜂窝织炎;颈椎退行性病变;头皮挫伤;癫痫;胆囊胆固醇沉着症;肾盂积水，其他的;输尿管扩张;脑缺血灶	治愈	徐晖	徐晖	陈泽新	后入路颈椎融合术;椎板切除减压术;2-3个椎骨融合或再融合;颈椎植骨术
14313	O210脊柱外科	2025-06-11	2025-06-16	3511846	邹金花	2	84Y	腰椎骨折	骨质疏松;陈旧性脊柱骨折;胸椎间盘突出;高血压;心脏病;下肢动脉粥样硬化;多发性肝囊肿;胆管扩张	治愈	吴爱悯	吴爱悯	吴爱悯	腰椎骨折球囊扩张成形术
14314	O210脊柱外科	2025-06-12	2025-06-17	3512202	王彩弟	1	72Y	第二颈椎骨折	颈椎间盘突出;高尿酸血症;胆囊结石;肾结石;前列腺增生;肝病;肺炎;下肢动脉粥样硬化;下肢动脉狭窄	好转	倪文飞	吴爱悯	吴爱悯
14315	O210脊柱外科	2025-06-15	2025-06-17	3512206	孙兰芬	2	72Y	腰椎骨折	骨质疏松;肝囊肿;老年性心脏病	治愈	倪文飞	吴爱悯	吴爱悯	腰椎骨折球囊扩张成形术
14316	O210脊柱外科	2025-06-10	2025-06-18	3512510	施余花	2	74Y	腰椎间盘突出	高血压;糖尿病;陈旧性肋骨骨折;下肢动脉粥样硬化;脂肪肝;胆囊结石;高尿酸血症;肺间质纤维化	治愈	倪文飞	吴爱悯	吴爱悯	腰椎髓核切除术;经皮椎间盘电热纤维环成形术(IDET)
14317	O210脊柱外科	2025-06-12	2025-06-19	3512911	杨彩华	2	65Y	胸椎骨折T11/T12	颈椎退行性病变;胸椎退行性病变;腰椎退行性病变;腰椎间盘突出;胸腔积液;腰背部挫伤;下肢静脉血栓形成;老年性心脏瓣膜病;胆囊结石;肾结石	治愈	黄其杉	黄其杉	周凯亮	胸椎骨折球囊扩张成形术
14318	O210脊柱外科	2025-06-10	2025-06-19	3512913	张朋涛	1	29Y	取除骨折内固定装置	手术后状态，其他特指的;脂肪肝;肝回声不均;前列腺结石;肺部阴影	其他	徐晖	徐晖	陈泽新	脊柱内固定装置去除术
14319	O210脊柱外科	2025-06-16	2025-06-19	3512914	邢爱平	2	82Y	胸椎骨折	骨质疏松;胸椎术后;脊椎退行性病变;颈椎病;颈椎椎管狭窄;高血压;主动脉钙化;胸腔积液;心功能不全;肝囊肿;胆囊结石;下肢动脉粥样硬化;冠状动脉粥样硬化;肾超声检查异常	治愈	徐晖	徐晖	陈泽新	胸椎骨折球囊扩张成形术
14320	O210脊柱外科	2025-06-14	2025-06-19	3512916	倪彩英	2	80Y	腰椎骨折	脊椎退行性病变;骨质疏松;脑梗死;高血压;糖尿病;心功能不全;下肢动脉粥样硬化;脂肪肝;后天性肾囊肿;肺部阴影;肺部感染;主动脉钙化;冠状动脉粥样硬化	治愈	徐晖	徐晖	陈泽新	腰椎骨折球囊扩张成形术
14321	O210脊柱外科	2025-06-11	2025-06-20	3513232	缪爱女	2	65Y	胸椎多处骨折	腰椎骨折L2;骨质疏松;胸椎退行性病变;支气管扩张伴感染;高血压;糖尿病;人工髋关节;下肢动脉粥样硬化	治愈	黄其杉	黄其杉	周凯亮	经皮穿刺脊柱后凸成形术
14322	O210脊柱外科	2025-06-10	2025-06-20	3513233	江邦法	1	52Y	取除骨折内固定装置	手术后状态，其他特指的;下肢动脉粥样硬化;肺部阴影	其他	徐晖	徐晖	陈泽新	脊柱内固定装置去除术
14323	O210脊柱外科	2025-06-13	2025-06-20	3513253	杨云兰	2	76Y	胸椎多处骨折	腰椎骨折L5;陈旧性腰椎骨折;腰椎术后;腰椎退行性病变;腰椎间盘突出;骨质疏松;肺炎;脂肪肝;肝囊肿;后天性肾囊肿;下肢动脉粥样硬化	治愈	黄其杉	黄其杉	周凯亮	经皮穿刺脊柱后凸成形术
14324	O210脊柱外科	2025-06-17	2025-06-22	3513698	黄爱微	2	69Y	腰椎骨折	陈旧性胸椎骨折;陈旧性腰椎骨折;脊柱血管瘤;腰椎间盘突出;腰椎退行性病变;胸椎退行性病变;高血压;脂肪肝;肾结石;后天性肾囊肿;下肢动脉粥样硬化;老年性心脏瓣膜病;骨质疏松	治愈	黄其杉	黄其杉	周凯亮	经皮椎骨成形术
14325	O210脊柱外科	2025-06-11	2025-06-22	3513718	徐济新	1	40Y	腰椎骨折	桡骨远端骨折;钩骨骨折;支气管扩张伴感染	治愈	倪文飞	吴爱悯	吴爱悯	腰椎骨折切开复位内固定术
14326	O210脊柱外科	2025-06-07	2025-06-23	3514099	黄军微	2	38Y	颈部脊髓损伤	第二颈椎骨折;多处挫伤	好转	徐晖	徐晖	陈泽新	后入路颈椎融合术;颈椎骨折切开复位内固定术;颈椎植骨术;2-3个椎骨融合或再融合;颅骨牵引术
14327	O210脊柱外科	2025-06-20	2025-06-24	3514504	张明朋	1	75Y	骨质疏松伴有病理性骨折	陈旧性胸椎骨折;胆囊结石;肾结石;前列腺结石	治愈	倪文飞	吴爱悯	吴爱悯	胸椎骨折球囊扩张成形术
14328	O210脊柱外科	2025-06-17	2025-06-24	3514508	张美英	2	67Y	胸椎骨折	骨质疏松;腰椎退行性病变;黄韧带肥厚;腰骶椎间盘突出;腰骶椎间盘变性;多发性肝囊肿;胃恶性肿瘤个人史	治愈	倪文飞	吴爱悯	吴爱悯	胸椎骨折球囊扩张成形术
14329	O210脊柱外科	2025-06-16	2025-06-26	3514981	刘大庆	1	31Y	取除骨折内固定装置	手术后状态，其他特指的;肺部阴影	其他	徐晖	徐晖	陈泽新	脊柱内固定装置去除术
14330	O210脊柱外科	2025-06-22	2025-06-26	3515037	麻素祥	1	38Y	取除骨折内固定装置	肺大疱;阑尾术后	其他	黄其杉	黄其杉	周凯亮	脊柱内固定装置去除术
14331	O210脊柱外科	2025-06-22	2025-06-26	3515041	李文英	2	94Y	骨质疏松伴有病理性骨折	胸椎术后;腰椎术后;胸椎退行性病变;肺部感染;胸腔积液;陈旧性肋骨骨折;脊柱侧弯	治愈	田乃锋	田乃锋	周凯亮	胸椎骨折球囊扩张成形术
14332	O210脊柱外科	2025-06-18	2025-06-27	3515299	蓝朝斌	1	42Y	取除骨折内固定装置	脊髓损伤后遗症;肺大疱;脂肪肝	其他	徐晖	徐晖	陈泽新	脊柱内固定装置去除术
14333	O210脊柱外科	2025-06-16	2025-06-27	3515343	洪建	1	42Y	腰椎骨折	腰背部挫伤;脊椎退行性病变;骨折术后;肺部阴影;胸腔积液	治愈	徐晖	徐晖	陈泽新	腰椎骨折切开复位内固定术
14334	O210脊柱外科	2025-06-16	2025-06-27	3515389	顾磊	1	44Y	取除骨折内固定装置	手术后状态，其他特指的;脂肪肝;胆囊息肉;前列腺结石	其他	徐晖	徐晖	陈泽新	脊柱内固定装置去除术
14335	O210脊柱外科	2025-06-15	2025-06-27	3515394	陈启立	1	50Y	颈部脊髓损伤	颈椎骨折C4;胸椎骨折;腓骨骨折;创伤性蛛网膜下出血;创伤性脑内血肿;头皮血肿;后天性肾囊肿	治愈	倪文飞	吴爱悯	吴爱悯	前入路颈椎融合术;前入路颈椎间盘切除术;4-8个椎骨融合或再融合;金属脊椎融合物置入术
14336	O210脊柱外科	2025-06-23	2025-06-29	3515783	钱凤玉	2	75Y	胸椎骨折	腰椎间盘突出;胸椎术后;腰椎术后;胸椎退行性病变;腰椎退行性病变;骨质疏松;泌尿道感染;胸腔积液;后天性肾囊肿;脂肪肝	治愈	黄其杉	黄其杉	周凯亮	胸椎骨折球囊扩张成形术
14337	O210脊柱外科	2025-06-22	2025-06-29	3515786	温玉秋	2	48Y	取除骨折内固定装置	后天性肾囊肿;肾结石;老年性心脏病	其他	倪文飞	吴爱悯	吴爱悯	脊柱内固定装置去除术
14338	O210脊柱外科	2025-06-26	2025-06-29	3515789	程玉钗	2	65Y	腰椎骨折L3	脊柱血管瘤;骨质疏松;腰椎术后;肾结石	治愈	黄其杉	黄其杉	周凯亮	腰椎骨折球囊扩张成形术;经皮穿刺脊柱后凸成形术
14339	O210脊柱外科	2025-06-23	2025-06-29	3515793	吴陈花	2	76Y	骨质疏松伴有病理性骨折	心功能不全;心房颤动;脊椎退行性病变;肺部阴影;糖尿病;高血压;脑梗死后遗症;脂肪肝;胆囊结石;后天性肾囊肿;肾上腺结节性增生	治愈	徐晖	徐晖	陈泽新	胸椎骨折球囊扩张成形术;椎骨活组织检查
14340	O210脊柱外科	2025-06-22	2025-06-29	3515797	李玉菊	2	64Y	颈部脊髓损伤	颈椎骨折C5;颈椎间盘突出;颈部挫伤;颈椎退行性病变;胆囊术后;高血压;脂肪肝;肾结石	好转	徐晖	徐晖	陈泽新
14341	O210脊柱外科	2025-06-22	2025-06-29	3515821	张花柳	2	77Y	胸椎骨折	骨质疏松;后天性肾囊肿;下肢动脉粥样硬化	治愈	倪文飞	吴爱悯	吴爱悯	胸椎骨折球囊扩张成形术
14342	O210脊柱外科	2025-06-20	2025-06-29	3515830	谢凤弟	2	57Y	胸椎多处骨折	胸椎椎管狭窄;腰椎骨折L5;胸部挫伤;腰背部挫伤;胸腔积液;老年性心脏瓣膜病;后天性肾囊肿;脂肪肝;手术后状态，其他特指的;肾结石	治愈	田乃锋	田乃锋	周凯亮	胸椎骨折切开复位内固定术
14343	O210脊柱外科	2025-06-20	2025-06-30	3516145	汤爱珠	2	58Y	取除骨折内固定装置	腰椎退行性病变;骨密度和结构其他特指的疾患;肺部阴影	其他	徐晖	徐晖	陈泽新	脊柱内固定装置去除术
14344	O210脊柱外科	2025-06-23	2025-07-01	3516417	陈亨田	1	65Y	骨质疏松伴有病理性骨折	陈旧性腰椎骨折;腰椎退行性病变;肺部阴影;肺大疱;主动脉钙化;陈旧性肋骨骨折;肠肿瘤;高血压;肾功能不全;高血压肾损害;老年性心脏瓣膜病;冠状动脉粥样硬化	好转	黄其杉	黄其杉	周凯亮	腰椎骨折球囊扩张成形术;椎骨活组织检查
14345	O210脊柱外科	2025-06-23	2025-07-01	3516539	黄三妹	2	81Y	骶骨骨折	胸椎骨折;腰椎术后;慢性阻塞性肺病伴有急性加重;肺大疱;肝胆管结石;下肢动脉粥样硬化;下肢静脉血栓形成;肾错构瘤;脑卒中后遗症;子宫内膜恶性肿瘤个人史;高血压;糖尿病;脂肪肝	治愈	田乃锋	田乃锋	周凯亮	经皮穿刺脊柱后凸成形术;椎骨活组织检查
14346	O210脊柱外科	2025-06-28	2025-07-02	3516821	卢相兰	2	68Y	胸椎骨折	足舟状骨骨折;骨质疏松;腰椎间盘突出;高血压;后天性肾囊肿;脂肪肝;胆囊息肉;后天性肾囊肿;肾结石;老年性心脏病	治愈	倪文飞	吴爱悯	吴爱悯	胸椎骨折球囊扩张成形术;椎骨活组织检查
14347	O210脊柱外科	2025-06-21	2025-07-02	3516840	倪菊英	2	64Y	腰椎骨折L2	骨质疏松伴有病理性骨折;脊椎退行性病变;腰椎间盘突出;高血压;高脂血症;胆囊结石;肾结石;二尖瓣反流;心功能不全	治愈	林仲可	林仲可	王胜	腰椎骨折球囊扩张成形术
14348	O210脊柱外科	2025-06-29	2025-07-04	3517558	徐荣光	1	61Y	胸椎骨折	骨质疏松;慢性乙型病毒性肝炎;恶性肿瘤术后恢复期;胸椎退行性病变;腰椎退行性病变;前列腺结石	治愈	黄其杉	黄其杉	周凯亮	胸椎骨折球囊扩张成形术
14349	O210脊柱外科	2025-06-28	2025-07-04	3517625	黄忠飞	1	55Y	颈椎骨折	颈椎前移;颈椎间盘突出;多发性腰椎骨折;腰骶椎间盘突出;腰椎退行性病变;头部的浅表损伤;泌尿道感染;后天性肾囊肿;前列腺结石;筛窦炎;肺部阴影	好转	田乃锋	田乃锋	周凯亮
14350	O210脊柱外科	2025-06-26	2025-07-06	3518119	李珠花	2	86Y	骨质疏松伴有病理性骨折	脊椎退行性病变;肺部感染;冠状动脉粥样硬化;退行性主动脉瓣疾患;主动脉(瓣)关闭不全;慢性胃炎;甲状腺结节;脂肪肝;后天性肾囊肿;肾结石;锁骨下动脉粥样硬化;下肢动脉血栓形成	治愈	徐晖	徐晖	陈泽新	胸椎骨折球囊扩张成形术
14351	O210脊柱外科	2025-06-27	2025-07-06	3518133	吴银忠	2	60Y	颈部脊髓损伤	颈椎椎管狭窄;头部的损伤;陈旧性肱骨骨折;脂肪肝;后天性肾囊肿;老年性心脏病	好转	倪文飞	吴爱悯	吴爱悯
14352	O210脊柱外科	2025-06-29	2025-07-06	3518151	温亦农	1	41Y	取除骨折内固定装置	陈旧性肺结核;前列腺结石;前列腺囊肿	其他	黄其杉	黄其杉	周凯亮	脊柱内固定装置去除术
14353	O210脊柱外科	2025-06-28	2025-07-06	3518156	贺明启	1	65Y	颈椎多处骨折	胸椎骨折T1/T2;高血压;颈椎间盘突出;颈椎退行性病变;头皮裂伤;多发性脑梗死;肺气肿合并肺大泡;矽肺;前列腺增生;下肢动脉粥样硬化	好转	田乃锋	田乃锋	周凯亮
14354	O210脊柱外科	2025-07-03	2025-07-07	3518568	黄梅花	2	70Y	腰椎骨折	腰骶椎间盘突出;脊柱血管瘤;骨质疏松;胸椎退行性病变;腰椎退行性病变;骨折术后;肺部阴影;肝血管瘤;下肢动脉粥样硬化;肝囊肿;后天性肾囊肿	治愈	田乃锋	田乃锋	周凯亮	腰椎骨折球囊扩张成形术
14355	O210脊柱外科	2025-07-05	2025-07-08	3519049	倪银连	2	67Y	胸椎多处骨折	骨质疏松;高血压;肺部阴影;陈旧性腰椎骨折;脊椎退行性病变;胸神经根疾患，不可归类在他处者;胆囊肌腺症	治愈	徐晖	徐晖	陈泽新	胸椎骨折球囊扩张成形术;椎骨活组织检查
14356	O210脊柱外科	2025-07-06	2025-07-09	3519377	郑雪英	2	76Y	骨质疏松伴有病理性骨折	脊椎前移;腰椎术后;胸椎退行性病变;腰椎退行性病变;高血压;老年性心脏瓣膜病;下肢动脉粥样硬化	治愈	田乃锋	田乃锋	周凯亮	胸椎骨折球囊扩张成形术;腰椎骨折球囊扩张成形术
14357	O210脊柱外科	2025-07-04	2025-07-09	3519394	郑细月	2	65Y	骨质疏松伴有病理性骨折	高血压;下肢动脉粥样硬化;肝回声不均;糖尿病;下肢静脉曲张;胆囊息肉	治愈	倪文飞	吴爱悯	吴爱悯	腰椎骨折球囊扩张成形术
14358	O210脊柱外科	2025-07-07	2025-07-10	3519864	叶文连	2	65Y	胸椎骨折	胸椎退行性病变;阑尾术后;肺部阴影	治愈	田乃锋	田乃锋	周凯亮	胸椎骨折球囊扩张成形术
14359	O210脊柱外科	2025-07-08	2025-07-10	3519872	王冬兰	2	85Y	胸椎骨折	胸椎退行性病变;骨质疏松;泌尿道感染;老年性心脏瓣膜病;高血压	治愈	田乃锋	田乃锋	周凯亮	胸椎骨折球囊扩张成形术;椎骨活组织检查
14360	O210脊柱外科	2025-07-02	2025-07-11	3520244	林玲妹	2	81Y	骨质疏松伴有病理性骨折	糖尿病;老年性心脏病;结肠占位性病变	治愈	倪文飞	吴爱悯	吴爱悯	经皮穿刺脊柱后凸成形术
14361	O210脊柱外科	2025-06-28	2025-07-13	3520846	周成连	1	68Y	多发性腰椎骨折	腰骶椎间盘突出;腰椎椎管狭窄;高血压;慢性阻塞性肺病;肺动脉高压;下肢动脉粥样硬化;后天性肾囊肿;脂肪肝;肝囊肿;单侧腹股沟疝，不伴有梗阻或坏疽;老年性心脏病;肾超声检查异常;下肢静脉曲张;下肢静脉血栓形成;肝回声不均	治愈	倪文飞	吴爱悯	吴爱悯	腰椎骨折切开复位内固定术
14362	O210脊柱外科	2025-07-06	2025-07-13	3520849	刘祥英	2	76Y	骨质疏松伴有病理性骨折	高血压;糖尿病;下肢动脉粥样硬化;脂肪肝;老年性心脏病;下肢静脉曲张	治愈	倪文飞	吴爱悯	吴爱悯	胸椎骨折球囊扩张成形术;椎骨活组织检查
14363	O210脊柱外科	2025-07-05	2025-07-13	3520855	林宜茂	1	37Y	腰椎骨折	脂肪肝	治愈	倪文飞	吴爱悯	吴爱悯	腰椎骨折切开复位内固定术
14364	O210脊柱外科	2025-07-05	2025-07-13	3520860	汤仙凤	2	74Y	腰椎骨折	骨质疏松;肝胆管扩张;胆囊结石;老年性心脏病	治愈	倪文飞	吴爱悯	吴爱悯	腰椎骨折切开复位内固定术;腰椎骨折球囊扩张成形术
14365	O210脊柱外科	2025-07-06	2025-07-13	3520862	朱绿竹	2	86Y	骨质疏松伴有病理性骨折	脊柱继发恶性肿瘤;腰骶椎间盘突出;腰椎椎管狭窄;脊椎退行性病变;肺恶性肿瘤;肺部阴影;老年性心脏瓣膜病;下肢动脉粥样硬化	好转	黄其杉	黄其杉	周凯亮	腰椎骨折球囊扩张成形术;椎骨活组织检查
14366	O210脊柱外科	2025-07-08	2025-07-13	3520864	陈体全	1	72Y	腰椎骨折L2	腰椎退行性病变;颈椎间盘突出;手术后状态，其他特指的;肾功能不全;糖尿病;前列腺增生;前列腺结石;下肢动脉粥样硬化;老年性心脏瓣膜病	治愈	黄其杉	黄其杉	周凯亮	腰椎骨折球囊扩张成形术
14367	O210脊柱外科	2025-07-05	2025-07-13	3520869	钱师文	1	68Y	腰椎骨折L1	腰骶椎间盘突出;腰椎椎管狭窄;后天性肾囊肿;肾结石;前列腺增生;前列腺结石;下肢动脉粥样硬化;老年性心脏瓣膜病	治愈	黄其杉	黄其杉	周凯亮	腰椎骨折球囊扩张成形术
14368	O210脊柱外科	2025-07-09	2025-07-13	3520878	朱碎孙	2	72Y	腰椎骨折L4	腰椎间盘突出;胸椎间盘突出;胸椎椎管狭窄;胸椎退行性病变;后天性肾囊肿	治愈	田乃锋	田乃锋	周凯亮	腰椎骨折球囊扩张成形术;椎骨活组织检查
14369	O210脊柱外科	2025-07-07	2025-07-13	3520880	张爱美	2	58Y	腰椎骨折	胸椎骨折;骨质疏松;皮肤挫伤;后天性肾囊肿;肺大疱;胸腔积液	治愈	倪文飞	吴爱悯	吴爱悯	腰椎骨折球囊扩张成形术;胸椎骨折球囊扩张成形术;椎骨活组织检查
14370	O210脊柱外科	2025-07-07	2025-07-13	3520900	谢世献	1	39Y	取除骨折内固定装置		其他	倪文飞	吴爱悯	吴爱悯	脊柱内固定装置去除术;胫骨内固定装置去除术
14371	O210脊柱外科	2025-06-22	2025-07-13	3520935	洪张娥	2	66Y	胸椎骨折	肺部阴影;肺恶性肿瘤;肺继发恶性肿瘤;骨质疏松;糖尿病;下肢动脉硬化闭塞症;下肢动脉狭窄;肝囊肿;肾结石;老年性心脏病	治愈	倪文飞	吴爱悯	吴爱悯	胸椎骨折切开复位内固定术;椎骨内固定术;椎骨活组织检查
14372	O210脊柱外科	2025-07-03	2025-07-14	3521073	林建亮	1	55Y	第一颈椎骨折	创伤性蛛网膜下出血;颈椎间盘突出;颈椎椎管狭窄;颈椎退行性病变;肝回声不均	好转	徐晖	徐晖	陈泽新	Halo-Vest架外固定术
14373	O210脊柱外科	2025-07-05	2025-07-14	3521226	吴祖杰	1	42Y	颈部脊髓损伤	颈椎脱位C3/C4;颈椎多处骨折	好转	倪文飞	吴爱悯	吴爱悯	前入路颈椎融合术;前入路颈椎间盘切除术;金属脊椎融合物置入术;2-3个椎骨融合或再融合
14374	O210脊柱外科	2025-07-02	2025-07-14	3521233	王锡如	1	75Y	骨质疏松伴有病理性骨折	脊柱侧弯;脊柱后凸;帕金森病;精神分裂症;脑卒中后遗症;脊椎退行性病变;陈旧性胸椎骨折;陈旧性腰椎骨折;脊柱血管瘤;肾结石;前列腺增生;肺部阴影;低钾血症;肝回声不均;低钾血症;胆囊结石	治愈	徐晖	徐晖	陈泽新	胸椎骨折切开复位内固定术;腰椎骨折切开复位内固定术;椎管减压术;脊柱可调节装置置入术(生长棒);胸椎融合术，后入路;2-3个椎骨融合或再融合
14375	O210脊柱外科	2025-07-11	2025-07-14	3521240	叶永女	2	64Y	腰椎骨折L2	骨质疏松;腰椎间盘突出;肺部阴影;肝回声不均;下肢动脉粥样硬化	好转	田乃锋	田乃锋	周凯亮
14376	O210脊柱外科	2025-07-02	2025-07-14	3521255	周子泉	1	20Y	胸椎骨折	脑挫伤;创伤性蛛网膜下腔出血;创伤性硬膜下出血;枕骨骨折;窦性心动过缓	治愈	徐晖	徐晖	陈泽新	胸椎骨折切开复位内固定术;胸椎融合术，后入路;2-3个椎骨融合或再融合
14377	O210脊柱外科	2025-07-09	2025-07-16	3522048	张永兰	2	42Y	取除骨折内固定装置		其他	田乃锋	田乃锋	周凯亮	脊柱内固定装置去除术
14378	O210脊柱外科	2025-07-08	2025-07-16	3522056	侯鹏	1	32Y	取除骨折内固定装置	肺部阴影;肾结石	其他	田乃锋	田乃锋	周凯亮	脊柱内固定装置去除术
14379	O210脊柱外科	2025-07-06	2025-07-16	3522057	姜承华	1	66Y	取除骨折内固定装置	陈旧性胸椎骨折;手术后切口感染;糖尿病;骨折术后	其他	倪文飞	吴爱悯	吴爱悯	脊柱内固定装置去除术;伤口、感染或烧伤的切除性清创术
14380	O210脊柱外科	2025-07-11	2025-07-16	3522124	郑祥赞	1	86Y	颈椎骨折	头部的损伤;颈椎间盘突出;颈椎退行性病变;肺部阴影;眼术后;前列腺增生;诊断性影像检查的异常所见，其他特指身体结构的;退行性主动脉瓣疾患;二尖瓣及主动脉瓣关闭不全;肺动脉高压;心功能不全	好转	林仲可	林仲可	林仲可
14381	O210脊柱外科	2025-07-14	2025-07-16	3522145	周迪香	2	65Y	胸椎骨折	重度骨质疏松;高血压;脊椎退行性病变;腰椎间盘突出;老年性心脏瓣膜病;眼术后;脂肪肝;后天性肾囊肿;下肢动脉粥样硬化	治愈	田乃锋	田乃锋	周凯亮	胸椎骨折球囊扩张成形术;椎骨活组织检查
14382	O210脊柱外科	2025-07-14	2025-07-17	3522434	盛美蕊	2	75Y	腰椎骨折L1	重度骨质疏松;腰椎间盘突出;腰背部挫伤;腰椎退行性病变;手术后状态，其他特指的;后天性肾囊肿;下肢动脉粥样硬化	治愈	田乃锋	田乃锋	周凯亮	腰椎骨折球囊扩张成形术
14383	O210脊柱外科	2025-07-07	2025-07-17	3522435	余昌宝	1	59Y	腰椎骨折	腓骨骨折;腰背部挫伤;腰椎间盘突出;脊椎退行性病变;肺气肿	好转	徐晖	徐晖	陈泽新	石膏绷带固定
14384	O210脊柱外科	2025-07-07	2025-07-17	3522437	陈崇星	1	59Y	第二颈椎骨折	寰枕关节脱位;多处挫伤;皮肤裂伤;后天性脊椎滑脱;颈椎间盘突出;颈椎退行性病变;关节积液;前列腺增生	好转	徐晖	徐晖	陈泽新	Halo-Vest架外固定术
14385	O210脊柱外科	2025-07-13	2025-07-18	3522834	林美柳	2	66Y	胸椎骨折	骨质疏松;胸椎椎管狭窄;脊椎前移;腰骶椎间盘突出;腰椎椎管狭窄;高血压;胸椎退行性病变;腰椎退行性病变;胆囊息肉;后天性肾囊肿;下肢动脉粥样硬化	治愈	黄其杉	黄其杉	周凯亮	胸椎骨折球囊扩张成形术
14386	O210脊柱外科	2025-07-14	2025-07-19	3523058	黄微微	2	63Y	腰椎骨折L3	骨质疏松;胸椎退行性病变;腰椎退行性病变;腰骶椎间盘突出;脊柱侧弯;肺部阴影;心功能不全;脂肪肝;肾结石;胸椎楔形变	好转	林仲可	林仲可	林仲可	腰椎骨折球囊扩张成形术
14387	O210脊柱外科	2025-07-19	2025-07-19	3523134	庄红丽	2	26Y	腰椎骨折	创伤性截瘫	好转	毛方敏	毛方敏	万峻莱
14388	O210脊柱外科	2025-07-15	2025-07-20	3523442	刘微微	2	65Y	病理性骨折，不可归类在他处者	陈旧性脊柱骨折;甲状腺术后;腰椎术后;胸椎术后;高血压;糖尿病;脑卒中后遗症;胆囊结石;肝囊肿;后天性肾囊肿;肺大疱;老年性心脏瓣膜病	未愈	黄其杉	黄其杉	周凯亮
14389	O210脊柱外科	2025-07-14	2025-07-20	3523447	周本娥	2	50Y	取除骨折内固定装置		其他	倪文飞	吴爱悯	吴爱悯	脊柱内固定装置去除术
14390	O210脊柱外科	2025-07-06	2025-07-20	3523496	王春桃	2	72Y	腰椎间盘突出	腰椎椎管狭窄;后天性腰椎滑脱;骨质疏松;高血压;糖尿病;梅尼埃［美尼尔］病;骨折术后;腰椎退行性病变;老年性心脏瓣膜病;下肢动脉粥样硬化;胆囊结石;肾结石;脂肪肝	治愈	黄其杉	黄其杉	周凯亮	腰椎椎体间融合术，后入路;后入路腰椎间盘切除术;金属脊椎融合物置入术;2-3个椎骨融合或再融合;黄韧带部分切除术
14391	O210脊柱外科	2025-07-13	2025-07-20	3523528	赵万传	1	95Y	胸椎骨折	陈旧性腰椎骨折;锁骨肩峰端骨折;骨质疏松;肺部感染;主动脉钙化;冠状动脉粥样硬化;下肢动脉粥样硬化;二尖瓣钙化;主动脉瓣钙化;肝囊肿;后天性肾囊肿;下肢静脉曲张;前列腺结石;前列腺增生;老年性心脏病	治愈	倪文飞	吴爱悯	吴爱悯	胸椎骨折球囊扩张成形术;椎骨活组织检查
14392	O210脊柱外科	2025-07-01	2025-07-20	3523597	叶夏丹	2	79Y	脊椎前移	腰椎间盘突出;陈旧性腰椎骨折;腰椎退行性病变;高血压;肝囊肿	治愈	黄其杉	黄其杉	周凯亮	腰椎椎体间融合术，后入路;2-3个椎骨融合或再融合;金属脊椎融合物置入术;后入路腰椎间盘切除术;黄韧带部分切除术;椎管减压术;黄韧带部分切除术;椎骨内固定术
14393	O210脊柱外科	2025-07-16	2025-07-22	3524249	林玉花	2	71Y	腰椎骨折L1	脂肪肝;后天性肾囊肿;脊椎前移;腰椎间盘突出;高血压;糖尿病;胆囊切除术后状态;陈旧性肋骨骨折;老年性心脏瓣膜病;肺部阴影;下肢动脉粥样硬化	治愈	田乃锋	田乃锋	周凯亮	腰椎骨折球囊扩张成形术;椎骨活组织检查
14394	O210脊柱外科	2025-07-13	2025-07-22	3524276	胡志秀	2	55Y	腰椎骨折L1	后天性腰椎滑脱;脂肪肝;肾结石	治愈	田乃锋	田乃锋	周凯亮	腰椎骨折切开复位内固定术
14395	O210脊柱外科	2025-07-19	2025-07-22	3524285	卢国英	2	64Y	腰椎间盘突出	腰椎椎管狭窄;骨质疏松伴有病理性骨折;腰椎退行性病变;脊柱侧弯;肺部阴影;肺炎;心功能不全;下肢动脉粥样硬化;冠状动脉粥样硬化	治愈	林仲可	王胜	王胜	内镜下腰椎髓核切除术;经皮椎间盘电热纤维环成形术(IDET);经皮椎骨成形术;腰椎间盘造影
14396	O210脊柱外科	2025-07-15	2025-07-22	3524296	章青青	2	67Y	腰椎骨折	骨质疏松;高血压;肝功能检查的异常结果;脂肪肝;肝囊肿;后天性肾囊肿	治愈	倪文飞	吴爱悯	吴爱悯	腰椎骨折球囊扩张成形术;椎骨活组织检查
14397	O210脊柱外科	2025-07-11	2025-07-22	3524300	林巧妹	2	81Y	腰椎骨折L1	桡骨远端骨折;颈椎间盘突出;腰椎退行性病变;陈旧性尺骨骨折;下肢动脉粥样硬化;老年性心脏瓣膜病;脂肪肝;胆囊结石;高血压;糖尿病	治愈	田乃锋	田乃锋	周凯亮	腰椎骨折球囊扩张成形术;桡骨骨折切开复位钢板内固定术;关节软骨修复术
14398	O210脊柱外科	2025-07-20	2025-07-22	3524374	陈章松	1	57Y	腰骶椎间盘突出	腰椎椎管狭窄;脊椎前移;腰椎退行性病变;骨折术后;下肢动脉粥样硬化;脂肪肝;胆囊息肉;肾结石	治愈	田乃锋	田乃锋	周凯亮	内镜下腰椎髓核切除术;经皮椎间盘电热纤维环成形术(IDET)
14399	O210脊柱外科	2025-07-18	2025-07-23	3524554	黄连香	2	62Y	腰椎骨折	腰椎间盘突出;腰椎退行性病变;支气管扩张伴感染;胸腔积液;肺部阴影;脂肪肝;后天性肾囊肿	治愈	田乃锋	田乃锋	周凯亮	腰椎骨折球囊扩张成形术
14400	O210脊柱外科	2025-07-17	2025-07-23	3524652	张红燕	2	54Y	胸椎骨折	骨质疏松;消化道出血;胃溃疡;十二指肠溃疡;慢性胃炎	治愈	倪文飞	吴爱悯	吴爱悯	胸椎骨折球囊扩张成形术;椎骨活组织检查
14401	O210脊柱外科	2025-07-11	2025-07-23	3524655	张春燕	2	65Y	胸椎骨折	脊椎退行性病变;腰椎间盘突出;脂肪肝;高血压;主动脉钙化;肺部阴影;心脏和冠状循环诊断性影像检查的异常所见;二尖(瓣)关闭不全;心功能不全;冠状动脉粥样硬化	治愈	林仲可	林仲可	林仲可	胸椎骨折切开复位内固定术;经皮椎骨成形术;椎骨内固定术
14402	O210脊柱外科	2025-07-22	2025-07-24	3525077	王茂招	1	61Y	外踝骨折	清创术后;肺大疱;肝囊肿;肝钙化灶;脂肪肝;前列腺结石	好转	孙辽军	孙辽军	翁摄稷
14403	O210脊柱外科	2025-07-16	2025-07-25	3525454	戴明伟	1	50Y	颈椎骨折	强直性脊柱炎;糖尿病;高脂血症;颈椎退行性病变;骶髂关节炎，不可归类在他处者;肾结石;脂肪肝	好转	徐晖	徐晖	陈泽新	Halo-Vest架外固定术
14404	O210脊柱外科	2025-07-15	2025-07-25	3525476	金少眉	2	63Y	腰椎骨折	陈旧性腰椎骨折;腰椎间盘突出;老年性骨质疏松;腰椎退行性病变;脑卒中后遗症;瓣膜风湿性心内膜疾病;具有其他心脏瓣膜置换;肾结石;肝囊肿;后天性肾囊肿;下肢动脉粥样硬化;高血压	治愈	黄其杉	黄其杉	周凯亮	腰椎骨折球囊扩张成形术
14405	O210脊柱外科	2025-07-13	2025-07-25	3525484	张小汉	1	55Y	多发性腰椎骨折	腰椎椎管狭窄;腰椎楔形变;胸椎多处骨折;腰部脊髓其他损伤;前列腺囊肿;室间隔缺损;先天性心脏肥大	治愈	倪文飞	吴爱悯	吴爱悯	腰椎骨折切开复位内固定术;椎管减压术
14406	O210脊柱外科	2025-07-21	2025-07-27	3526075	王珠兰	2	73Y	骨质疏松伴有病理性骨折	下肢动脉粥样硬化;老年性心脏病	治愈	倪文飞	吴爱悯	吴爱悯	腰椎骨折球囊扩张成形术;胸椎骨折球囊扩张成形术;椎骨活组织检查
14407	O210脊柱外科	2025-07-21	2025-07-27	3526102	王亦来	1	65Y	骨质疏松伴有病理性骨折	肺部阴影;肺钙化;胆囊息肉;肾结石;前列腺结石;老年性心脏病	治愈	倪文飞	吴爱悯	吴爱悯	胸椎骨折球囊扩张成形术
14408	O210脊柱外科	2025-07-08	2025-07-27	3526104	叶松英	2	70Y	胸椎多处骨折	四根以上肋骨骨折不伴第一肋骨骨折;骨折术后;胸腔积液;皮肤挫伤;肺部感染;高血压;老年性心脏病;肺的其他疾患	好转	倪文飞	吴爱悯	吴爱悯
14409	O210脊柱外科	2025-07-26	2025-07-28	3526505	林超俊	1	27Y	腰椎骨折	脂肪肝	未愈	王向阳	盛孙仁	朱思品
14410	O210脊柱外科	2025-07-22	2025-07-28	3526562	石翠琼	2	54Y	髌骨骨折		好转	黄俊武	余贤斌	马亮亮	髌骨骨折切开复位张力带钢丝内固定术
14411	O210脊柱外科	2025-07-20	2025-07-29	3526921	温积存	1	53Y	颈部脊髓损伤	颈椎病;颈椎间盘突出;颅骨骨折;头皮血肿;胆囊息肉;甲状腺肿物	好转	黄其杉	黄其杉	周凯亮	前入路颈椎融合术;前入路颈椎间盘切除术;金属脊椎融合物置入术;4-8个椎骨融合或再融合
14412	O210脊柱外科	2025-07-26	2025-07-30	3527233	朱美花	2	77Y	骨质疏松伴有病理性骨折	后天性腰椎滑脱;具有心脏起搏器;高血压;后天性肾囊肿;下肢动脉粥样硬化;老年性心脏瓣膜病	治愈	田乃锋	田乃锋	周凯亮	腰椎骨折球囊扩张成形术
14413	O210脊柱外科	2025-07-23	2025-07-30	3527258	陈美志	1	36Y	腰椎骨折L1	腰椎间盘突出;肾结石;前列腺结石	治愈	田乃锋	田乃锋	周凯亮	腰椎骨折切开复位内固定术
14414	O210脊柱外科	2025-07-21	2025-07-30	3527277	王孔凤	1	50Y	取除骨折内固定装置	肺大疱;淋巴结钙化;下肢动脉粥样硬化;肝钙化灶;胆囊息肉;淋巴结增大	其他	倪文飞	吴爱悯	吴爱悯	脊柱内固定装置去除术
14415	O210脊柱外科	2025-07-15	2025-07-31	3527689	林扬兰	2	71Y	骨质疏松伴有病理性骨折	腰椎椎管狭窄;腰椎术后;腰椎退行性病变;帕金森病;胆囊息肉;子宫平滑肌瘤;高血压;2型糖尿病;取除骨折内固定装置	治愈	黄其杉	黄其杉	周凯亮	腰椎骨折球囊扩张成形术;椎骨内固定术;脊柱内固定装置去除术;椎管减压术
14416	O210脊柱外科	2025-07-23	2025-07-31	3527696	曹广军	1	33Y	颈部脊髓损伤	颈椎骨折C7;颈椎椎管狭窄;颈椎间盘突出;上颌窦炎;脂肪肝	好转	田乃锋	田乃锋	周凯亮	前入路颈椎融合术;椎体切除术伴椎间盘切除术;金属脊椎融合物置入术;2-3个椎骨融合或再融合
14417	O210脊柱外科	2025-07-29	2025-08-01	3528047	陈秀兰	2	64Y	胸椎骨折	骨质疏松;肺部阴影;脂肪肝;下肢动脉粥样硬化;肝回声不均;肝钙化灶;胆囊结石;后天性肾囊肿;老年性心脏病;腹部区域诊断性影像检查的异常所见(包括腹膜后腔)，其他的;肾超声检查异常	治愈	倪文飞	吴爱悯	吴爱悯	胸椎骨折球囊扩张成形术;椎骨活组织检查
14418	O210脊柱外科	2025-07-28	2025-08-01	3528096	潘怡春	2	60Y	骨质疏松伴有病理性骨折	肺部阴影;特发性肺纤维化;冠状动脉粥样硬化;下肢动脉粥样硬化;下肢静脉曲张;心功能不全	治愈	倪文飞	吴爱悯	吴爱悯	胸椎骨折球囊扩张成形术;椎骨活组织检查
14419	O210脊柱外科	2025-07-26	2025-08-02	3528243	王小娥	2	49Y	锁骨骨折	肩锁韧带损伤;臂丛神经损伤;头皮血肿;面部软组织挫伤;鼻甲肥大;脂肪肝;创伤性湿肺;清创术后;颅骨骨折	治愈	水小龙	水小龙	汪吉棋	锁骨骨折切开复位钢板内固定术;锁骨植骨术;上肢韧带缝合术
14420	O210脊柱外科	2025-07-28	2025-08-02	3528244	戴爱平	2	59Y	胸椎多处骨折	骨质疏松;胸椎椎管狭窄;脊椎退行性病变;下肢动脉粥样硬化;脂肪肝;肝囊肿	治愈	徐晖	徐晖	陈泽新	胸椎骨折球囊扩张成形术;椎骨活组织检查
14421	O210脊柱外科	2025-07-27	2025-08-02	3528245	徐余秀	2	78Y	胸椎骨折	陈旧性胸椎骨折;重度骨质疏松;高血压;糖尿病;脑卒中后遗症;肝囊肿;后天性肾囊肿;下肢动脉粥样硬化	治愈	黄其杉	黄其杉	周凯亮	经皮椎骨成形术
14422	O210脊柱外科	2025-07-28	2025-08-02	3528246	张素琴	2	70Y	胸椎骨折	骨质疏松;陈旧性胸椎骨折;陈旧性腰椎骨折;脊椎退行性病变;腰椎术后;肺炎;肝回声不均;下肢动脉粥样硬化	治愈	徐晖	徐晖	陈泽新	胸椎骨折球囊扩张成形术;椎骨活组织检查
14423	O210脊柱外科	2025-07-21	2025-08-02	3528263	吴纪春	1	57Y	腰椎骨折L3	腰椎间盘突出;两根肋骨骨折不伴第一肋骨骨折;肩胛骨骨折;头皮裂伤;胸腔积液;肝囊肿	治愈	田乃锋	田乃锋	周凯亮	腰椎骨折切开复位内固定术;腰椎后柱融合术，后入路;2-3个椎骨融合或再融合
14424	O210脊柱外科	2025-07-30	2025-08-03	3527353	黄美玉	2	83Y	骨质疏松伴有病理性骨折	陈旧性腰椎骨折;陈旧性胸椎骨折;腰椎退行性病变;泌尿道感染;主动脉钙化;后天性肾囊肿;下肢动脉粥样硬化;高血压;老年性心脏瓣膜病;冠状动脉粥样硬化	治愈	田乃锋	田乃锋	周凯亮	腰椎骨折球囊扩张成形术;椎骨活组织检查
14425	O210脊柱外科	2025-07-23	2025-08-03	3528516	刘维孝	1	58Y	股骨粗隆间骨折	高血压;前列腺钙化灶;头部浅表损伤;鼻骨骨折;肺部阴影;腰椎间盘突出;脂肪肝;胆囊息肉;腰椎退行性病变;腔隙性脑梗死	治愈	孔建中	陈墨川	陈墨川	股骨骨折切开复位螺钉内固定术;股骨植骨术
14426	O210脊柱外科	2025-07-27	2025-08-03	3528584	林家礼	1	70Y	胸椎骨折	陈旧性腰椎骨折;腰椎术后;重度骨质疏松;泌尿道感染;肾积水伴肾结石;下肢动脉粥样硬化	治愈	田乃锋	田乃锋	周凯亮	胸椎骨折球囊扩张成形术;椎骨活组织检查
14427	O210脊柱外科	2025-07-28	2025-08-03	3528613	周美玲	2	62Y	胸椎骨折	骨质疏松;后天性肾囊肿;老年性心脏病;特发性肺纤维化;胸腔积液	治愈	倪文飞	吴爱悯	吴爱悯	胸椎骨折球囊扩张成形术;椎骨活组织检查
14428	O210脊柱外科	2025-07-27	2025-08-03	3528617	陈文启	1	47Y	取除骨折内固定装置	脂肪肝	其他	黄其杉	黄其杉	周凯亮	脊柱内固定装置去除术
14429	O210脊柱外科	2025-07-19	2025-08-03	3528619	牛存生	1	48Y	多发性腰椎骨折	腰椎椎管狭窄;肩胛骨骨折;肋骨多处骨折;创伤性胸腔积液;创伤性气胸;肺部阴影	治愈	田乃锋	田乃锋	周凯亮	腰椎骨折切开复位内固定术;腰椎后柱融合术，后入路;2-3个椎骨融合或再融合
14430	O210脊柱外科	2025-07-28	2025-08-03	3528623	郑艮娒	2	76Y	胸椎骨折	多发性腰椎骨折;陈旧性胸椎骨折;重度骨质疏松;脊柱侧弯;腰椎退行性病变;高血压;骨折术后;多发性肝囊肿;胆囊结石;下肢动脉粥样硬化;老年性心脏瓣膜病	治愈	黄其杉	黄其杉	周凯亮	腰椎骨折球囊扩张成形术;胸椎骨折球囊扩张成形术
14431	O210脊柱外科	2025-07-23	2025-08-03	3528626	马式岳	1	51Y	颈部脊髓损伤	颈椎多处骨折;颈椎前移;颈部挫伤;头部的开放性伤口;颈椎退行性病变;肝血管瘤	治愈	徐晖	徐晖	陈泽新	后入路颈椎融合术;2-3个椎骨融合或再融合;椎骨内固定术;颈椎前路椎管减压术
14432	O210脊柱外科	2025-07-27	2025-08-03	3528632	黄足兰	2	63Y	胸椎骨折	重度骨质疏松;腰椎间盘突出;肺部阴影;肾结石;胸腔积液;后天性肾囊肿;下肢动脉粥样硬化	治愈	黄其杉	黄其杉	周凯亮	经皮椎骨成形术
14433	O210脊柱外科	2025-07-27	2025-08-03	3528636	徐拱飞	1	60Y	取除骨折内固定装置		其他	倪文飞	吴爱悯	吴爱悯	脊柱内固定装置去除术
14434	O210脊柱外科	2025-07-27	2025-08-03	3528641	蓝海华	2	45Y	取除骨折内固定装置	多发性肝囊肿	其他	倪文飞	吴爱悯	吴爱悯	脊柱内固定装置去除术
14435	O210脊柱外科	2025-08-01	2025-08-03	3528708	刘桂华	2	57Y	多发性腰椎骨折	胸椎骨折;骨质疏松;下肢动脉粥样硬化;老年性心脏病	好转	倪文飞	吴爱悯	吴爱悯
14436	O210脊柱外科	2025-07-20	2025-08-03	3528784	徐叶金	1	58Y	胸椎骨折	胸椎前移;颈椎棘突骨折;三根肋骨骨折不伴第一肋骨骨折;脊柱血管瘤;面部裂伤;胸腔积液;脑卒中;慢性鼻窦炎;脂肪肝;后天性肾囊肿	治愈	黄其杉	黄其杉	周凯亮	胸椎骨折切开复位内固定术;胸椎融合术，后入路;4-8个椎骨融合或再融合
14437	O210脊柱外科	2025-08-01	2025-08-07	3530216	张梅花	2	71Y	胸椎多处骨折	腰椎骨折L1;手术后状态，其他特指的;下肢动脉粥样硬化;老年性心脏瓣膜病;2型糖尿病	治愈	黄其杉	黄其杉	周凯亮	胸椎骨折球囊扩张成形术;腰椎骨折球囊扩张成形术
14438	O210脊柱外科	2025-08-04	2025-08-07	3530233	周媚媚	2	72Y	腰椎骨折L1	腰椎间盘突出;重度骨质疏松;腰椎退行性病变;泌尿道感染;老年性心脏瓣膜病;高血压	治愈	田乃锋	田乃锋	周凯亮	腰椎骨折球囊扩张成形术
14439	O210脊柱外科	2025-07-30	2025-08-07	3530284	卢素清	2	53Y	颈部脊髓损伤	颈椎骨折C3;颈椎椎管狭窄;创伤性截瘫;肺挫伤;腹股沟挫伤;头皮血肿;头部的损伤;胸腔积液;下肢静脉血栓形成;脂肪肝	好转	田乃锋	田乃锋	周凯亮	前入路颈椎融合术;椎体次全切除伴椎间盘切除术;金属脊椎融合物置入术;2-3个椎骨融合或再融合
14440	O210脊柱外科	2025-08-03	2025-08-07	3530290	汤有了	2	73Y	胸椎骨折	重度骨质疏松;人工髋关节;骨折术后;高血压;脂肪肝;后天性肾囊肿;老年性心脏瓣膜病	治愈	田乃锋	田乃锋	周凯亮	胸椎骨折球囊扩张成形术;椎骨活组织检查
14441	O210脊柱外科	2025-08-03	2025-08-07	3530427	杨香翠	2	68Y	骨质疏松伴有病理性骨折	人工膝关节;人工髋关节;胆囊切除术后状态;高血压;脂肪肝;肝囊肿;老年性心脏病	治愈	倪文飞	吴爱悯	吴爱悯	腰椎骨折球囊扩张成形术;椎骨活组织检查
14442	O210脊柱外科	2025-08-02	2025-08-08	3530610	林陈枢	1	57Y	腰椎骨折L1	脊椎前移;腰椎退行性病变;胆囊息肉;前列腺增生	治愈	田乃锋	田乃锋	周凯亮	腰椎骨折切开复位内固定术
14443	O210脊柱外科	2025-08-05	2025-08-08	3530633	娄美英	2	63Y	胸椎骨折	腰椎骨折;骨质疏松;脂肪肝;老年性心脏病	治愈	倪文飞	吴爱悯	吴爱悯	胸椎骨折球囊扩张成形术;腰椎骨折球囊扩张成形术
14444	O210脊柱外科	2025-08-06	2025-08-08	3530685	徐心娟	2	52Y	胸椎骨折	骨质疏松;肺部阴影	好转	倪文飞	吴爱悯	吴爱悯
14445	O210脊柱外科	2025-07-29	2025-08-10	3531227	郑贤媚	2	77Y	腰椎椎管狭窄	腰椎前移;骨质疏松伴有病理性骨折;肺部阴影;肺钙化;主动脉钙化;下肢动脉粥样硬化;脂肪肝;肝囊肿;老年性心脏病;冠状动脉粥样硬化;肺部感染;下肢静脉曲张	治愈	倪文飞	吴爱悯	吴爱悯	腰椎椎体间融合术，后入路;2-3个椎骨融合或再融合;腰椎间盘切除伴椎板切除术;金属脊椎融合物置入术
14446	O210脊柱外科	2025-08-05	2025-08-10	3531248	陈何菊	2	76Y	骨质疏松伴有病理性骨折	高血压;糖尿病;下肢动脉粥样硬化;胆囊息肉;肾结石;老年性心脏病;主动脉钙化;甲状腺钙化;后天性肾囊肿;冠状动脉粥样硬化;甲状腺肿	治愈	倪文飞	吴爱悯	吴爱悯	腰椎骨折球囊扩张成形术;椎骨活组织检查
14447	O210脊柱外科	2025-07-30	2025-08-10	3531259	朱永申	1	57Y	腰椎骨折L2	腰椎椎管狭窄;腰椎间盘突出;骨质疏松;肺部阴影;脂肪肝;手术后状态，其他特指的	治愈	田乃锋	田乃锋	周凯亮	腰椎骨折切开复位内固定术;椎骨内固定术;腰椎骨折球囊扩张成形术;腰椎后柱融合术，后入路;2-3个椎骨融合或再融合;腰椎椎板切除减压术
14448	O210脊柱外科	2025-07-26	2025-08-10	3531290	秦廷禄	1	47Y	腰椎骨折	腰椎椎管狭窄;马尾综合征;腰椎退行性病变;耻骨骨折	治愈	徐晖	徐晖	陈泽新	腰椎骨折切开复位内固定术;腰椎后柱融合术，后入路;2-3个椎骨融合或再融合
14449	O210脊柱外科	2025-07-30	2025-08-10	3531301	吴凤姿	2	31Y	腰椎骨折	跟骨骨折	治愈	倪文飞	吴爱悯	吴爱悯	跟骨骨折切开复位钢板内固定术;跟骨植骨术;关节软骨修复术;腰椎骨折切开复位内固定术
14450	O210脊柱外科	2025-07-31	2025-08-10	3531375	方云南	1	52Y	多发性腰椎骨折	耻骨骨折;脊椎退行性病变;高血压;脂肪肝;胆囊息肉;前列腺结石;前列腺钙化灶	治愈	徐晖	徐晖	陈泽新	腰椎骨折切开复位内固定术
14451	O210脊柱外科	2025-07-23	2025-08-11	3531640	华玉臣	1	46Y	腰椎骨折	外踝骨折;距骨骨折;骰骨骨折;跖骨骨折;跟骨骨折;头部浅表损伤;耳开放性伤口;外伤性牙齿缺失;创伤性牙脱位;多处挫伤;脊椎退行性病变	治愈	徐晖	徐晖	陈泽新	腰椎骨折切开复位内固定术
14452	O210脊柱外科	2025-08-05	2025-08-11	3531659	江杏凤	2	58Y	胸椎骨折T11/T12	腰椎间盘突出;胸椎退行性病变;腰椎退行性病变;肺部感染;胸腔积液;高血压	治愈	黄其杉	黄其杉	周凯亮	经皮椎骨成形术
14453	O210脊柱外科	2025-08-05	2025-08-11	3531666	徐杏娣	2	66Y	腰椎骨折	骨质疏松;掌骨骨折;指骨骨折;脂肪肝;肾结石;老年性心脏病	治愈	倪文飞	吴爱悯	吴爱悯	腰椎骨折球囊扩张成形术;椎骨活组织检查
14454	O210脊柱外科	2025-07-27	2025-08-11	3531721	林雪恩	1	65Y	脊柱内固定物植入感染	取除骨折内固定装置;陈旧性肋骨骨折;后天性肾囊肿;老年性心脏瓣膜病	治愈	黄其杉	黄其杉	周凯亮	皮肤和皮下坏死组织切除清创术;创面封闭式负压引流术（VSD);脊柱内固定装置去除术;皮肤和皮下坏死组织切除清创术
14455	O210脊柱外科	2025-08-06	2025-08-11	3531759	叶松柳	2	62Y	腰椎骨折	骨质疏松;脂肪肝;胆囊结石;椎管内蛛网膜囊肿	治愈	倪文飞	吴爱悯	吴爱悯	腰椎骨折球囊扩张成形术;椎骨活组织检查
14456	O210脊柱外科	2025-08-07	2025-08-12	3532098	叶加丰	1	81Y	骨质疏松伴有病理性骨折	室性期前收缩;肺钙化;间质性肺病;支气管扩张(症);肺部感染;肝囊肿;胆囊胆固醇沉着症;后天性肾囊肿;前列腺增生;下肢动脉粥样硬化;老年性心脏病;前列腺结石;下肢静脉血栓形成	治愈	倪文飞	吴爱悯	吴爱悯	胸椎骨折球囊扩张成形术;椎骨活组织检查
14457	O210脊柱外科	2025-08-08	2025-08-13	3532530	钱锦英	2	78Y	骨质疏松伴有病理性骨折	老年性心脏病;胆囊结石;肾结石;肺气肿合并肺大泡;胆汁淤积症;肺部阴影	治愈	倪文飞	吴爱悯	吴爱悯	胸椎骨折球囊扩张成形术;椎骨活组织检查
14458	O210脊柱外科	2025-08-08	2025-08-13	3532538	林素媚	2	80Y	腰椎骨折L2	淋巴瘤;脾术后;骨质疏松;胸腔积液;腹腔积液;下肢动脉粥样硬化;老年性心脏瓣膜病	治愈	黄其杉	黄其杉	周凯亮	腰椎骨折球囊扩张成形术;椎骨活组织检查
14459	O210脊柱外科	2025-08-07	2025-08-13	3532569	刘际很	1	61Y	胸椎骨折	骨质疏松;肺气肿合并肺大泡;肺部阴影;特发性肺纤维化;前列腺增生;老年性心脏病	治愈	倪文飞	吴爱悯	吴爱悯	胸椎骨折球囊扩张成形术;椎骨活组织检查
14460	O210脊柱外科	2025-08-05	2025-08-14	3532956	卓多妹	2	78Y	胸椎多处骨折	多发性腰椎骨折;陈旧性腰椎骨折;陈旧性胸椎骨折;重度骨质疏松;骨折术后;干燥综合征\[舍格伦\];高血压;肝囊肿;后天性肾囊肿;老年性心脏瓣膜病	治愈	黄其杉	黄其杉	周凯亮	胸椎骨折球囊扩张成形术;腰椎骨折球囊扩张成形术;椎骨活组织检查
14461	O210脊柱外科	2025-08-10	2025-08-14	3532958	李菊妹	2	70Y	腰椎骨折L4	腰椎间盘突出;重度骨质疏松;高血压;眼术后;慢性乙型病毒性肝炎;肺部感染;肺部阴影	治愈	田乃锋	田乃锋	周凯亮	腰椎骨折球囊扩张成形术
14462	O210脊柱外科	2025-07-28	2025-08-14	3532959	黄五芽	1	60Y	多发性腰椎骨折	跟骨骨折;骨质疏松	治愈	倪文飞	吴爱悯	吴爱悯	腰椎骨折切开复位内固定术
14463	O210脊柱外科	2025-08-10	2025-08-14	3532967	李松林	2	61Y	腰椎骨折	腰椎间盘突出;重度骨质疏松;腰椎退行性病变;老年性心脏瓣膜病;高血压;2型糖尿病	治愈	田乃锋	田乃锋	周凯亮	腰椎骨折球囊扩张成形术
14464	O210脊柱外科	2025-08-10	2025-08-15	3533357	林小云	2	76Y	骨质疏松伴有病理性骨折	脊柱侧弯;泌尿道感染;心房颤动;阑尾术后;后天性肾囊肿;下肢动脉粥样硬化;高血压	治愈	黄其杉	黄其杉	周凯亮	胸椎骨折球囊扩张成形术;腰椎骨折球囊扩张成形术
14465	O210脊柱外科	2025-08-12	2025-08-17	3534018	郑玉花	2	71Y	胸椎骨折	胸椎退行性病变;腰椎退行性病变;重度骨质疏松;子宫切除术后状态;2型糖尿病;肾结石;肝囊肿	治愈	黄其杉	黄其杉	周凯亮	经皮椎骨成形术
14466	O210脊柱外科	2025-08-10	2025-08-17	3534058	张权弟	1	45Y	取除骨折内固定装置	后天性肾囊肿;肾结石;前列腺增生	其他	田乃锋	田乃锋	周凯亮	脊柱内固定装置去除术;跟骨内固定物取出术
14467	O210脊柱外科	2025-08-06	2025-08-17	3534077	何德全	1	57Y	胸椎多处骨折	腰椎骨折;三根肋骨骨折不伴第一肋骨骨折;胸腔积液;前列腺结石;老年性心脏病;肺钙化;多发性肝囊肿;肺部感染	治愈	倪文飞	吴爱悯	吴爱悯	胸椎骨折切开复位内固定术;腰椎骨折切开复位内固定术
14468	O210脊柱外科	2025-08-12	2025-08-17	3534164	黄华江	1	64Y	肿瘤性病理性骨折	食管恶性肿瘤;骨继发恶性肿瘤;全身性广泛继发恶性肿瘤;肺恶性肿瘤;腰椎退行性病变;胸腔积液;肾结石;前列腺增生;肺部阴影	好转	黄其杉	黄其杉	周凯亮	腰椎骨折球囊扩张成形术;胸椎骨折球囊扩张成形术
14469	O210脊柱外科	2025-08-13	2025-08-18	3534451	李玉燕	2	66Y	多发性腰椎骨折	骨质疏松;老年性心脏病;多发性肝囊肿;肝钙化灶;脂肪肝	治愈	倪文飞	吴爱悯	吴爱悯	腰椎骨折球囊扩张成形术;椎骨活组织检查
14470	O210脊柱外科	2025-08-08	2025-08-18	3534455	黄丁木	1	54Y	腰椎骨折L3	骶骨骨折;尾骨骨折;耻骨骨折;脊椎退行性病变;脂肪肝;前列腺结石;肺大疱	治愈	徐晖	徐晖	陈泽新	腰椎骨折切开复位内固定术;腰椎后柱融合术，后入路;2-3个椎骨融合或再融合
14471	O210脊柱外科	2025-08-15	2025-08-18	3534479	陈孝兴	1	68Y	腰椎骨折	骨质疏松;高血压;后天性肾囊肿;胸腔积液;主动脉钙化;肝囊肿;胆囊息肉;椎管内囊肿;老年性心脏病	治愈	倪文飞	吴爱悯	吴爱悯	腰椎骨折球囊扩张成形术;椎骨活组织检查
14472	O210脊柱外科	2025-08-16	2025-08-19	3534893	郑祥泽	1	65Y	胸椎多处骨折	胸椎退行性病变;骨质疏松;脂肪肝	治愈	田乃锋	田乃锋	周凯亮	胸椎骨折球囊扩张成形术;椎骨活组织检查
14473	O210脊柱外科	2025-08-04	2025-08-19	3534897	叶俐娟	2	74Y	骨质疏松伴有病理性骨折	乙型肝炎后肝硬化失代偿期;腹腔积液;高血压;2型糖尿病;脾大;肾盂积水，其他的;胸腔积液;心包积液;甲状腺术后;腔隙性脑梗死;精神分裂症	治愈	倪文飞	吴爱悯	吴爱悯	腰椎骨折球囊扩张成形术;椎骨活组织检查
14474	O210脊柱外科	2025-08-15	2025-08-20	3535281	江阿媚	2	75Y	胸椎压缩性骨折	胸椎退行性病变;腰椎退行性病变;眼术后;老年性心脏瓣膜病;脂肪肝	治愈	田乃锋	田乃锋	周凯亮	胸椎骨折球囊扩张成形术
14475	O210脊柱外科	2025-08-11	2025-08-20	3535414	高春燕	2	48Y	取除骨折内固定装置	后天性肾囊肿;肺大疱;支气管扩张(症)	其他	徐晖	徐晖	陈泽新	脊柱内固定装置去除术
14476	O210脊柱外科	2025-08-11	2025-08-21	3535762	韩生隆	1	56Y	取除骨折内固定装置	肺部阴影;脂肪肝;后天性肾囊肿	其他	徐晖	徐晖	陈泽新	脊柱内固定装置去除术
14477	O210脊柱外科	2025-08-12	2025-08-22	3536160	戚连妹	2	69Y	腰椎骨折L1	胸椎退行性病变;腰椎退行性病变;具有其他心脏瓣膜置换;下肢动脉粥样硬化;肺肿物;眼术后;肺气肿;肝淤血;脾大;心房颤动	治愈	田乃锋	田乃锋	周凯亮	腰椎骨折球囊扩张成形术
14478	O210脊柱外科	2025-08-06	2025-08-22	3536175	陈拱妹	2	72Y	化脓性脊柱炎	骨质疏松;单关节炎;老年性心脏病;特发性肺纤维化;胸腔积液;自发性骨折;主动脉钙化;胸膜肥厚	好转	倪文飞	吴爱悯	吴爱悯	椎骨活组织检查
14479	O210脊柱外科	2025-08-15	2025-08-23	3536377	陈章松	1	57Y	腰椎间盘突出	腰椎术后;腰椎退行性病变;骨折术后;脂肪肝;肺部阴影;下肢静脉血栓形成	治愈	田乃锋	田乃锋	周凯亮	腰椎椎体间融合术，后入路;2-3个椎骨融合或再融合;金属脊椎融合物置入术;后入路腰椎间盘切除术
14480	O210脊柱外科	2025-08-03	2025-08-24	3531269	陈再金	1	77Y	腰椎间盘突出	腰椎椎管狭窄;颈椎间盘突出;骨质疏松;脊椎退行性病变;取除骨折内固定装置;人工膝关节;肺大疱;多发性肝囊肿;后天性肾囊肿;前列腺增生;前列腺结石;下肢动脉粥样硬化;腰椎术后	治愈	黄其杉	黄其杉	周凯亮	腰椎椎体间融合术，后入路;脊柱内固定装置去除术;4-8个椎骨融合或再融合;金属脊椎融合物置入术;腰椎间盘切除伴椎管减压术
14481	O210脊柱外科	2025-08-20	2025-08-24	3536748	胡春秀	2	81Y	骨质疏松伴有病理性骨折	肺部感染	治愈	倪文飞	吴爱悯	吴爱悯	胸椎骨折球囊扩张成形术;椎骨活组织检查
14482	O210脊柱外科	2025-08-13	2025-08-24	3536833	陶仁淮	1	58Y	腰椎骨折	头部的损伤;皮肤挫伤;后天性肾囊肿;老年性心脏病	治愈	倪文飞	吴爱悯	吴爱悯	腰椎骨折切开复位内固定术
14483	O210脊柱外科	2025-07-09	2025-08-24	3536835	杨功晓	1	65Y	手术后切口感染	化脓性脊柱炎;椎体感染;皮肤感染;糖尿病;腰椎术后;腰椎退行性病变;陈旧性腰椎骨折;脂肪肝;前列腺增生;前列腺结石;特发性肺纤维化;主动脉钙化;冠状动脉粥样硬化	好转	徐晖	徐晖	陈泽新	硬脊膜外病损切除术;脊柱内固定装置去除术;椎骨负压引流管置入术;肌肉清创术;椎骨负压引流管置入术;内镜下椎间隙病灶清除引流术;内镜下腰椎髓核切除术;经皮椎间盘电热纤维环成形术(IDET);椎骨负压引流管置入术;其他骨置入装置去除;椎骨负压引流管置入术
14484	O210脊柱外科	2025-08-06	2025-08-24	3536842	邵敬柏	1	59Y	胸椎多处骨折	强直性脊柱炎;骨质疏松;肺部感染;老年性心脏病;肺大疱;胆囊术后;后天性肾囊肿;前列腺钙化灶;脱髓鞘性白质脑病	治愈	倪文飞	吴爱悯	吴爱悯	胸椎骨折切开复位内固定术
14485	O210脊柱外科	2025-08-20	2025-08-25	3537213	胡美丽	2	84Y	骨质疏松伴有病理性骨折	老年性心脏病;肺部感染;肝囊肿;胆囊结石	治愈	倪文飞	吴爱悯	吴爱悯	腰椎骨折球囊扩张成形术;椎骨活组织检查
14486	O210脊柱外科	2025-08-09	2025-08-25	3537252	谢张桃	2	67Y	第二颈椎骨折	头皮血肿;创伤性蛛网膜下腔出血;脑萎缩;支气管炎;肺挫伤;胸腔积液;老年性心脏瓣膜病;肺动脉高压;颈椎退行性病变;后天性肾囊肿	好转	徐晖	徐晖	陈泽新	颅骨牵引术;Halo-Vest架外固定术
14487	O210脊柱外科	2025-08-19	2025-08-26	3537611	余纪林	1	65Y	胸椎骨折	腰椎骨折;骨质疏松;高血压;老年性心脏病;肝囊肿	治愈	倪文飞	吴爱悯	吴爱悯	胸椎骨折球囊扩张成形术;腰椎骨折球囊扩张成形术;椎骨活组织检查
14488	O210脊柱外科	2025-08-21	2025-08-26	3537612	戴玉梯	1	50Y	脊柱血管瘤	腰椎间盘突出;腰椎退行性病变;骨折术后;脑卒中后遗症;脂肪肝;胆囊结石;肾结石;前列腺增生;前列腺结石	治愈	黄其杉	黄其杉	周凯亮	腰椎骨折球囊扩张成形术;椎骨活组织检查
14489	O210脊柱外科	2025-08-15	2025-08-26	3537625	林长权	1	32Y	取除骨折内固定装置	脂肪肝;老年性心脏病;特发性肺纤维化	其他	倪文飞	吴爱悯	吴爱悯	脊柱内固定装置去除术
14490	O210脊柱外科	2025-08-17	2025-08-26	3537656	吴美知	2	75Y	胸椎骨折	骨质疏松;老年性心脏病;下肢动脉粥样硬化;肝回声不均;肝胆管扩张;膀胱疾患	治愈	倪文飞	吴爱悯	吴爱悯	椎骨活组织检查;胸椎骨折球囊扩张成形术
14491	O210脊柱外科	2025-08-21	2025-08-27	3538025	虞爱琴	2	69Y	胸椎骨折	骨质疏松;高血压;脑梗死后遗症;帕金森病;甲状腺功能减退症;肺肿物;后天性肾囊肿	治愈	倪文飞	吴爱悯	吴爱悯	胸椎骨折球囊扩张成形术;椎骨活组织检查
14492	O210脊柱外科	2025-08-18	2025-08-27	3538123	王道想	1	53Y	取除骨折内固定装置	脂肪肝;冠状动脉粥样硬化	其他	徐晖	徐晖	陈泽新	脊柱内固定装置去除术
14493	O210脊柱外科	2025-08-20	2025-08-28	3538443	木凤英	2	74Y	胸椎骨折T11/T12	陈旧性胸椎骨折;胸椎退行性病变;腰椎退行性病变;重度骨质疏松;甲状腺术后;子宫术后;支气管哮喘;陈旧性肋骨骨折;高血压;2型糖尿病;脂肪肝;后天性肾囊肿;下肢动脉粥样硬化;下肢静脉血栓形成	治愈	黄其杉	黄其杉	周凯亮	胸椎骨折球囊扩张成形术
14494	O210脊柱外科	2025-08-24	2025-08-28	3538450	陈谦谦	2	73Y	骨质疏松伴有病理性骨折	脂肪肝	治愈	倪文飞	吴爱悯	吴爱悯	胸椎骨折球囊扩张成形术;椎骨活组织检查
14495	O210脊柱外科	2025-08-17	2025-08-28	3538455	徐安然	1	75Y	颈部脊髓损伤	创伤性颈椎间盘破裂;颈椎多处骨折;颈部挫伤;颈椎间盘突出;颈椎退行性病变;高血压;老年性脑萎缩;肾结石;后天性肾囊肿;胆总管结石;胆总管扩张	治愈	徐晖	徐晖	陈泽新	前入路颈椎融合术;前入路颈椎间盘切除术;4-8个椎骨融合或再融合;颈椎后路单开门椎管减压术;金属脊椎融合物置入术
14496	O210脊柱外科	2025-08-05	2025-08-28	3538458	谢寿安	1	71Y	胸椎多处骨折	腰椎骨折L1;肩胛骨骨折;肋骨骨折;创伤性蛛网膜下腔出血;脊椎退行性病变;肺气肿;后天性肾囊肿	治愈	徐晖	徐晖	陈泽新	胸椎骨折切开复位内固定术;腰椎骨折切开复位内固定术;胸椎融合术，后入路;4-8个椎骨融合或再融合
14497	O210脊柱外科	2025-08-21	2025-08-28	3538488	王宝香	2	80Y	胸椎骨折	颈椎间盘突出;重度骨质疏松;胸椎退行性病变;高血压;2型糖尿病;老年性心脏瓣膜病;完全性右束支传导阻滞	治愈	田乃锋	田乃锋	周凯亮	胸椎骨折球囊扩张成形术;椎骨活组织检查
14498	O210脊柱外科	2025-08-20	2025-08-28	3538494	夏晨晖	1	18Y	胸椎骨折		治愈	倪文飞	吴爱悯	吴爱悯	胸椎骨折切开复位内固定术
14499	O210脊柱外科	2025-08-24	2025-08-29	3538867	金春莲	2	61Y	腰椎骨折	腰椎间盘突出;胸腔积液;Ⅰ度房室传导阻滞;高血压;2型糖尿病;脂肪肝;腰椎退行性病变	治愈	黄其杉	黄其杉	周凯亮	腰椎骨折球囊扩张成形术
14500	O210脊柱外科	2025-08-24	2025-08-29	3538891	祝勤女	2	63Y	胸椎骨折	陈旧性胸椎骨折;重度骨质疏松;胸椎退行性病变;腰椎退行性病变;泌尿道感染;频发性室性期前收缩;眼术后;高血压	治愈	黄其杉	黄其杉	周凯亮	胸椎骨折球囊扩张成形术
14501	O210脊柱外科	2025-08-24	2025-08-29	3538915	洪爱玉	2	59Y	胸椎骨折	骨质疏松;地中海贫血;脾大;脊椎退行性病变	治愈	徐晖	徐晖	陈泽新	胸椎骨折球囊扩张成形术
14502	O210脊柱外科	2025-08-21	2025-08-31	3538482	周海武	1	44Y	取除骨折内固定装置	脂肪肝	其他	黄其杉	黄其杉	周凯亮	脊柱内固定装置去除术
14503	O210脊柱外科	2025-08-17	2025-08-31	3539466	侯东爵	1	20Y	颈部脊髓损伤	颈椎多处骨折;颈椎前移;创伤性颈椎间盘破裂;颈部食管挫伤;头皮血肿;创伤性硬脑膜外血肿;颅腔积气;创伤性蛛网膜下腔出血;颅骨和面骨多发性骨折;清创术后;腰椎退行性病变	好转	徐晖	徐晖	陈泽新	前入路颈椎融合术;前入路颈椎间盘切除术;金属脊椎融合物置入术;2-3个椎骨融合或再融合
14504	O210脊柱外科	2025-08-19	2025-08-31	3539552	刘嫦玉	2	72Y	腰椎骨折	骨质疏松;老年性痴呆;肾结石;老年性心脏病	治愈	倪文飞	吴爱悯	吴爱悯	腰椎骨折切开复位内固定术
14505	O210脊柱外科	2025-08-27	2025-08-31	3539700	章近祥	1	62Y	多发性腰椎骨折	腰椎术后;骨质疏松;肝囊肿;后天性肾囊肿;心功能不全	治愈	倪文飞	吴爱悯	吴爱悯	腰椎骨折球囊扩张成形术;椎骨活组织检查
14506	O210脊柱外科	2025-08-17	2024-09-01	3539957	邵灵灿	1	25Y	多发性腰椎骨折	腰椎椎管狭窄;胸椎多处骨折;马尾综合征;脑脊液漏;腰背部挫伤;骶骨骨折;尾骨骨折;腰椎扭伤和劳损;多处开放性伤口;多处挫伤;头皮血肿;气胸;肾结石	治愈	徐晖	徐晖	徐晖	腰椎骨折切开复位内固定术;腰椎后柱融合术，后入路;2-3个椎骨融合或再融合;腰椎椎板切除减压术;椎体次全切除伴椎间盘切除术;腰椎植骨术
14507	O210脊柱外科	2025-08-28	2024-09-02	3540325	陈姜芽	2	84Y	骨质疏松伴有病理性骨折	陈旧性腰椎骨折;脊椎退行性病变;骨折术后;支气管哮喘;肺部感染;肺气肿合并肺大泡;间质性肺病;下肢动脉粥样硬化;脂肪肝;肝钙化灶	治愈	徐晖	徐晖	徐晖	腰椎骨折球囊扩张成形术;椎骨活组织检查
14508	O210脊柱外科	2025-08-24	2024-09-02	3540328	赵均微	1	46Y	腰椎骨折	腰部脊髓功能损伤;腰椎退行性病变;后天性肾囊肿;脂肪肝;肾结石	好转	黄其杉	田乃锋	田乃锋	腰椎骨折切开复位内固定术;腰椎后柱融合术，后入路;2-3个椎骨融合或再融合
14509	O210脊柱外科	2025-08-27	2024-09-02	3540329	贾海全	1	47Y	取除骨折内固定装置	肝回声不均;后天性肾囊肿;前列腺增生;肺肿物	其他	倪文飞	吴爱悯	吴爱悯	脊柱内固定装置去除术
14510	O210脊柱外科	2025-08-22	2024-09-03	3540751	朱淼茶	2	54Y	第二颈椎骨折	颈椎脱位;颈椎椎管狭窄;颈椎后纵韧带骨化;高血压;后天性肾囊肿	治愈	倪文飞	吴爱悯	吴爱悯	后入路颈椎融合术;2-3个椎骨融合或再融合;颈椎后路单开门椎管减压术
14511	O210脊柱外科	2025-08-26	2024-09-03	3540754	张雪凤	2	63Y	腰椎骨折	骨质疏松;脊椎退行性病变;胆囊息肉;后天性肾囊肿	治愈	徐晖	徐晖	徐晖	腰椎骨折球囊扩张成形术;椎骨活组织检查
14512	O210脊柱外科	2025-08-30	2024-09-03	3540787	周秋莲	2	72Y	胸椎多处骨折	骨折术后;心功能不全;脂肪肝;下肢动脉粥样硬化;肺炎;腰骶椎间盘突出;骨质疏松;肺气肿	治愈	田乃锋	黄其杉	田乃锋	胸椎骨折球囊扩张成形术;椎骨活组织检查
14513	O210脊柱外科	2025-08-26	2024-09-04	3541112	陶张朱	2	66Y	胸椎骨折	胸椎退行性病变;腰椎退行性病变;腰椎间盘突出;脊柱骨软骨病;骨折术后;高血压;心功能不全;脂肪肝;后天性肾囊肿	治愈	黄其杉	田乃锋	田乃锋	胸椎骨折球囊扩张成形术
14514	O210脊柱外科	2025-08-31	2024-09-05	3541467	陈晓爱	2	71Y	胸椎骨折	骨质疏松;类风湿性关节炎;溃疡性结肠炎;甲状腺术后;高脂血症;高血压;心功能不全;肺肿物;胸椎退行性病变;腰椎退行性病变	治愈	黄其杉	田乃锋	田乃锋	胸椎骨折球囊扩张成形术
14515	O210脊柱外科	2025-08-30	2024-09-05	3541475	陈小玲	2	63Y	腰椎骨折L2	胸椎退行性病变;腰椎退行性病变;腰骶椎间盘突出;颈椎退行性病变;颈椎间盘突出;头皮血肿;多处挫伤;胆囊术后;高血压;2型糖尿病;肺肿物;心功能不全;脂肪肝;肝胆管扩张;下肢动脉粥样硬化	治愈	黄其杉	田乃锋	田乃锋	腰椎骨折球囊扩张成形术
14516	O210脊柱外科	2024-09-02	2024-09-07	3542044	陈越光	1	70Y	胸椎骨折	腰椎骨折L1;肋骨多处骨折;肺气肿合并肺大泡;肺部阴影;脂肪肝;前列腺结石;胸椎退行性病变;腰椎退行性病变;心功能不全	治愈	黄其杉	田乃锋	黄其杉	胸椎骨折球囊扩张成形术;腰椎骨折球囊扩张成形术
14517	O210脊柱外科	2024-09-02	2024-09-07	3542048	金秀钗	2	58Y	腰椎骨折	腰椎间盘突出;腰骶椎间盘突出;内脏反位;脂肪肝;肺部阴影;骨质疏松	治愈	黄其杉	田乃锋	田乃锋	腰椎骨折球囊扩张成形术
14518	O210脊柱外科	2025-08-25	2024-09-07	3542069	刘永杰	1	40Y	胸椎骨折	腰椎骨折;腰背部挫伤;腰骶椎间盘突出;脂肪肝;胸腔积液	治愈	徐晖	徐晖	徐晖	胸椎骨折切开复位内固定术;腰椎骨折切开复位内固定术
14519	O210脊柱外科	2025-08-31	2024-09-07	3542073	黄阿碎	1	91Y	腰椎骨折	骨质疏松;胸椎楔形变;肺动脉高压;肝回声不均;肝钙化灶;副脾;前列腺增生;下肢动脉粥样硬化;前列腺结石	治愈	倪文飞	吴爱悯	吴爱悯	腰椎骨折球囊扩张成形术;椎骨活组织检查
14520	O210脊柱外科	2024-09-01	2024-09-07	3542076	李爱华	2	61Y	胸椎骨折	骨质疏松;糖尿病;肺挫伤;泌尿道感染;肺肿物;胆囊结石	治愈	徐晖	徐晖	徐晖	胸椎骨折球囊扩张成形术;椎骨活组织检查
14521	O210脊柱外科	2025-08-31	2024-09-07	3542078	刘正东	1	48Y	取除骨折内固定装置	腰椎退行性病变;脂肪肝;副脾;肺部阴影;心功能不全;肺大疱	其他	黄其杉	田乃锋	田乃锋	脊柱内固定装置去除术
14522	O210脊柱外科	2025-08-31	2024-09-07	3542081	刘明星	1	26Y	取除骨折内固定装置	肝钙化灶	其他	倪文飞	吴爱悯	吴爱悯	脊柱内固定装置去除术
14523	O210脊柱外科	2024-09-01	2024-09-07	3542084	夏林香	2	92Y	腰椎骨折	脊柱侧弯;骨质疏松;脊柱血管瘤;具有心脏和血管植入物和移植物;心脏术后心功能不全;高血压;高脂血症;肺肿物;肺大疱;肾结石;胆汁淤积症	治愈	徐晖	徐晖	徐晖	经皮椎骨成形术
14524	O210脊柱外科	2024-09-02	2024-09-07	3542131	林阿娥	2	57Y	多发性腰椎骨折	骨质疏松;腰椎间盘突出;骨折术后;肺结节病;心功能不全;脂肪肝	治愈	黄其杉	田乃锋	田乃锋	经皮椎骨成形术
14525	O210脊柱外科	2025-08-31	2024-09-08	3542438	赵华明	1	53Y	取除骨折内固定装置	后天性腰椎滑脱;脾术后;肺肿物;后天性肾囊肿	其他	黄其杉	田乃锋	田乃锋	脊柱内固定装置去除术
14526	O210脊柱外科	2025-08-31	2024-09-08	3542440	熊万兵	1	47Y	取除骨折内固定装置	心功能不全;肺部阴影;后天性腰椎滑脱	其他	黄其杉	田乃锋	田乃锋	脊柱内固定装置去除术
14527	O210脊柱外科	2025-08-31	2024-09-08	3542442	陈维昆	1	38Y	取除骨折内固定装置	肺肿物;脂肪肝	其他	徐晖	徐晖	徐晖	脊柱内固定装置去除术
14528	O210脊柱外科	2025-08-24	2024-09-08	3542443	王以水	1	40Y	颈部脊髓损伤	创伤性截瘫;颈椎多处骨折;颈椎脱位;肩胛骨骨折;上颌骨骨折;眶骨骨折;鼻骨骨折;胸部挫伤;气胸;肝功能检查的异常结果;多处挫伤;胸腔积液;后天性肾囊肿;肺的其他疾患;乙型病毒性肝炎	好转	黄其杉	田乃锋	田乃锋	前入路颈椎融合术;前入路颈椎间盘切除术;颈椎后路单开门椎管减压术;2-3个椎骨融合或再融合;金属脊椎融合物置入术;椎骨内固定术;肩胛骨骨折切开复位钢板内固定术
14529	O210脊柱外科	2025-08-28	2024-09-10	3543271	林中啸	1	43Y	多发性腰椎骨折	腰背部挫伤;肺肿物;脂肪肝	治愈	徐晖	徐晖	徐晖	腰椎骨折切开复位内固定术;腰椎后柱融合术，后入路;2-3个椎骨融合或再融合
14530	O210脊柱外科	2025-08-23	2024-09-11	3543676	叶玉娥	2	68Y	脊髓囊肿	病理性骨折，不可归类在他处者;腰椎间盘突出;人工髋关节;脑卒中后遗症;肺部感染;肝囊肿;心功能不全;脂肪肝;肾结石;后天性肾囊肿;胸椎术后;腰椎术后;下肢静脉血栓形成	好转	黄其杉	田乃锋	田乃锋	硬脊膜下病损切除术;胸椎椎板切除减压术;椎骨内固定术
14531	O210脊柱外科	2024-09-05	2024-09-11	3543686	周明昆	1	61Y	取除骨折内固定装置	肺气肿合并肺大泡;肝钙化灶;喉的其他疾病;心功能不全;胆囊息肉;前列腺增生;前列腺结石;乙型病毒性肝炎	其他	黄其杉	田乃锋	田乃锋	脊柱内固定装置去除术
14532	O210脊柱外科	2024-09-03	2024-09-11	3543750	李翠珠	2	64Y	腰椎骨折	骨质疏松;腰椎间盘突出;肾结石;肝囊肿;后天性肾囊肿;心功能不全	治愈	黄其杉	田乃锋	田乃锋	腰椎骨折球囊扩张成形术
14533	O210脊柱外科	2025-08-27	2024-09-11	3543755	李国华	2	49Y	腰骶椎间盘突出	腰椎椎管狭窄;腰椎退行性病变;陈旧性腰椎骨折	治愈	徐晖	徐晖	徐晖	腰骶椎椎体间融合术，后入路;2-3个椎骨融合或再融合;金属脊椎融合物置入术;后入路腰椎间盘切除术
14534	O210脊柱外科	2025-08-31	2024-09-12	3544039	徐雪莲	2	85Y	胸椎骨折	腰椎骨折;尺骨茎突骨折伴桡骨远端骨折;骨质疏松;腰椎间盘突出;骨折术后;心功能不全;下肢动脉粥样硬化	治愈	黄其杉	田乃锋	田乃锋	桡骨骨折闭合复位钢针内固定术;胸椎骨折球囊扩张成形术;腰椎骨折球囊扩张成形术;桡骨外固定术
14535	O210脊柱外科	2024-09-08	2024-09-14	3544672	黄美兰	2	69Y	腰背部筋膜炎	病理性骨折，不可归类在他处者;胸椎术后;陈旧性脊柱骨折;腰骶椎间盘突出	治愈	黄其杉	田乃锋	田乃锋
14536	O210脊柱外科	2024-09-09	2024-09-14	3544677	陈光成	1	70Y	胸椎骨折	腰骶椎间盘突出;肺气肿;脂肪肝;主动脉钙化;主动脉瓣钙化;冠状动脉粥样硬化	治愈	倪文飞	吴爱悯	吴爱悯	胸椎骨折球囊扩张成形术;椎骨活组织检查
14537	O210脊柱外科	2025-08-21	2024-09-14	3544696	李传允	1	80Y	多发性腰椎骨折	骨质疏松;强直性脊柱炎;高血压;下肢动脉粥样硬化;脂肪肝;肝囊肿;胆囊结石;后天性肾囊肿;前列腺增生;蛛网膜下出血;颅腔积气;多发性脑梗死;老年性脑萎缩;上颌窦炎;前列腺结石	治愈	倪文飞	吴爱悯	吴爱悯	腰椎骨折切开复位内固定术
14538	O210脊柱外科	2025-08-20	2024-09-15	3545108	牟升考	1	64Y	感染性脊椎病，其他的	硬脊膜外脓肿;胸腔积液;脊髓病;自发性骨折;陈旧性锁骨骨折;陈旧性肋骨骨折;窦性心动过速;前列腺增生;前列腺结石;肺大疱;腰椎间盘突出;腹水	治愈	黄其杉	黄其杉	黄其杉	胸腔闭式引流术
14539	O210脊柱外科	2024-09-11	2024-09-16	3545495	李玉柳	2	52Y	腰椎压缩性骨折	高脂血症;脂肪肝;上颌窦炎	好转	王向阳	盛孙仁	盛孙仁
14540	O210脊柱外科	2024-09-08	2024-09-16	3545519	林志玲	2	57Y	多发性腰椎骨折	腓骨骨折累及踝关节;踝三角韧带损伤;肋骨多处骨折;胸骨骨折;肺挫伤;肺部感染;头部的损伤;膝关节积液;半月板撕裂，近期的;多处挫伤;高血压;腋下淋巴结肿大	治愈	黄其杉	田乃锋	田乃锋	腰椎骨折球囊扩张成形术;踝关节骨折切开复位钢板内固定术;关节软骨修复术;腓骨植骨术;踝融合术
14541	O210脊柱外科	2024-09-08	2024-09-16	3545525	谭小玉	2	48Y	多发性腰椎骨折	腰椎椎管狭窄;胸腔积液;肺肿物;心功能不全;脂肪肝	治愈	黄其杉	田乃锋	田乃锋	腰椎骨折切开复位内固定术
14542	O210脊柱外科	2024-09-14	2024-09-17	3545892	黄桂领	2	79Y	胸椎骨折	陈旧性胸椎骨折;骨质疏松;高血压;肺肿物;主动脉钙化	好转	倪文飞	吴爱悯	吴爱悯
14543	O210脊柱外科	2024-09-12	2024-09-18	3546298	谢信禄	2	73Y	胸椎骨折	骨质疏松;高血压;脂肪肝;肾上腺增粗	治愈	倪文飞	吴爱悯	吴爱悯	胸椎骨折球囊扩张成形术;椎骨活组织检查
14544	O210脊柱外科	2024-09-11	2024-09-18	3546307	何美红	2	64Y	胸椎骨折T11/T12	骨质疏松;肝内胆管结石;肝管结石;肝胆管扩张;后天性肾囊肿;心功能不全	治愈	黄其杉	田乃锋	田乃锋	经皮椎骨成形术
14545	O210脊柱外科	2024-09-16	2024-09-18	3546361	朱玉钗	2	71Y	胸椎骨折	骨质疏松;骨折术后;高血压;2型糖尿病;脂肪肝;睡眠障碍	治愈	黄其杉	田乃锋	田乃锋	胸椎骨折球囊扩张成形术
14546	O210脊柱外科	2024-09-15	2024-09-20	3546896	丁丽娟	2	65Y	胸椎骨折	骨质疏松;骨折术后;脂肪肝;胆囊息肉	治愈	倪文飞	吴爱悯	吴爱悯	胸椎骨折球囊扩张成形术;椎骨活组织检查
14547	O210脊柱外科	2024-09-14	2024-09-21	3547253	严建议	1	42Y	取除骨折内固定装置	肺部阴影;肝囊肿	其他	黄其杉	田乃锋	田乃锋	脊柱内固定装置去除术
14548	O210脊柱外科	2024-09-10	2024-09-21	3547255	周双	1	29Y	取除骨折内固定装置	脂肪肝	其他	倪文飞	吴爱悯	吴爱悯	脊柱内固定装置去除术
14549	O210脊柱外科	2024-09-16	2024-09-21	3547261	杨碎兰	2	76Y	胸椎骨折	骨质疏松;高血压;肺肿物;下肢动脉粥样硬化;脂肪肝	治愈	倪文飞	吴爱悯	吴爱悯	胸椎骨折球囊扩张成形术;椎骨活组织检查
14550	O210脊柱外科	2024-09-09	2024-09-21	3547276	吴金保	1	44Y	腰椎骨折	胸椎骨折;心功能不全	治愈	黄其杉	田乃锋	田乃锋	腰椎骨折切开复位内固定术;腰椎后柱融合术，后入路;2-3个椎骨融合或再融合
14551	O210脊柱外科	2024-09-15	2024-09-21	3547280	谢进良	1	57Y	胸椎多处骨折	胸椎椎管狭窄;不完全截瘫;头皮血肿;肾结石	治愈	倪文飞	吴爱悯	吴爱悯	胸椎骨折切开复位内固定术;胸椎融合术，后入路;2-3个椎骨融合或再融合
14552	O210脊柱外科	2024-09-15	2024-09-22	3547624	吴和菊	2	64Y	多发性腰椎骨折	腰椎椎管狭窄;腰部脊髓损伤;骨质疏松;脊椎退行性病变;创伤性湿肺;肺肿物;肺大疱	治愈	徐晖	徐晖	徐晖	腰椎骨折球囊扩张成形术;椎骨活组织检查
14553	O210脊柱外科	2025-08-19	2024-09-22	3547668	曹正青	1	55Y	多发性腰椎骨折	腰部脊髓损伤;脊椎退行性病变;多处开放性伤口;胫腓骨下端骨折;低氧血症;膈疝;骶骨骨折;髂骨骨折;髋臼骨折;肋骨多处骨折;多处挫伤;上腔静脉综合征;胸腔积液;肺不张;创伤性湿肺;低氧血症;肺气肿合并肺大泡;后天性肾囊肿;前列腺增生;额窦囊肿;蝶窦囊肿;额窦上颌窦炎;耵聍栓塞	治愈	徐晖	徐晖	徐晖	经胸膈疝修补术;胫骨骨折切开复位钢板内固定术;腓骨骨折闭合复位钢针内固定术;胫骨植骨术;皮肤和皮下坏死组织切除清创术;腰椎骨折切开复位内固定术;腰椎后柱融合术，后入路;2-3个椎骨融合或再融合;腰椎椎板切除减压术
14554	O210脊柱外科	2024-09-16	2024-09-23	3548090	潘侠侠	1	29Y	取除骨折内固定装置		其他	黄其杉	田乃锋	田乃锋	脊柱内固定装置去除术
14555	O210脊柱外科	2024-09-10	2024-09-23	3548092	项方表	1	51Y	腰椎骨折	脂肪肝;肾结石伴有输尿管结石;高血压;酒精性肝病;血小板减少;心功能不全;肺肿物	治愈	黄其杉	田乃锋	田乃锋	腰椎骨折切开复位内固定术;椎骨活组织检查;腰椎后柱融合术，后入路;2-3个椎骨融合或再融合
14556	O210脊柱外科	2024-09-07	2024-09-23	3548097	谢瑄仙	2	63Y	腰椎骨折	腰椎椎管狭窄;骨质疏松;脊椎前移;心包积液;肝囊肿;肾结石;胆囊结石;胆囊息肉	治愈	倪文飞	吴爱悯	吴爱悯	腰椎骨折切开复位内固定术
14557	O210脊柱外科	2024-09-16	2024-09-23	3548103	高元武	1	28Y	取除骨折内固定装置	骨折术后;肺肿物	其他	倪文飞	吴爱悯	吴爱悯	脊柱内固定装置去除术;踝关节内固定装置去除术
14558	O210脊柱外科	2024-09-21	2024-09-23	3548149	余彩香	2	57Y	多发性腰椎骨折	两根肋骨骨折不伴第一肋骨骨折;骨质疏松;心功能不全	治愈	黄其杉	田乃锋	田乃锋	腰椎骨折球囊扩张成形术
14559	O210脊柱外科	2024-09-18	2024-09-24	3548433	张胜弟	2	60Y	多发性腰椎骨折	骨质疏松;高血压;肾后天性缺失	治愈	徐晖	徐晖	徐晖	腰椎骨折球囊扩张成形术;椎骨活组织检查
14560	O210脊柱外科	2024-09-22	2024-09-24	3548467	黄玉英	2	82Y	腰椎骨折	骨质疏松;肝囊肿;胆囊结石;心功能不全;下肢动脉粥样硬化;肺肿物	治愈	黄其杉	田乃锋	田乃锋	腰椎骨折球囊扩张成形术;椎骨活组织检查
14561	O210脊柱外科	2024-09-09	2024-09-24	3548476	邵月凤	2	52Y	腰椎骨折	多处挫伤;创伤性湿肺;胸腔积液;肾结石	治愈	徐晖	徐晖	徐晖	腰椎骨折切开复位内固定术;腰椎后柱融合术，后入路;2-3个椎骨融合或再融合
14562	O210脊柱外科	2024-09-07	2024-09-25	3548862	梅长群	1	48Y	腰椎骨折	肋骨骨折;脂肪肝	治愈	倪文飞	吴爱悯	吴爱悯	腰椎骨折切开复位内固定术
14563	O210脊柱外科	2024-09-21	2024-09-25	3548883	陈邦听	1	46Y	取除骨折内固定装置	高血压;脂肪肝;后天性肾囊肿;肺肿物	其他	黄其杉	田乃锋	田乃锋	脊柱内固定装置去除术
14564	O210脊柱外科	2024-09-11	2024-09-25	3548887	周文亮	1	67Y	颈部脊髓损伤	颈椎多处骨折;胸椎骨折;多发性腰椎骨折;颈椎脱位;上颌骨骨折;上颌窦炎;冈上肌肌腱损伤;骨质疏松;膀胱结石;前列腺增生;心功能不全	治愈	黄其杉	田乃锋	田乃锋	前入路颈椎融合术;前入路颈椎间盘切除术;2-3个椎骨融合或再融合;金属脊椎融合物置入术;腰椎骨折球囊扩张成形术;胸椎骨折球囊扩张成形术
14565	O210脊柱外科	2024-09-22	2024-09-26	3549318	郑筱微	2	71Y	胸椎骨折	骨质疏松;脂肪肝;肝钙化灶;胆囊结石;糖尿病	治愈	倪文飞	吴爱悯	吴爱悯	经皮穿刺脊柱后凸成形术;椎骨活组织检查
14566	O210脊柱外科	2024-09-14	2024-09-26	3549322	曾碎英	2	67Y	多发性腰椎骨折	骨质疏松;肺肿物;脂肪肝;多发性肝囊肿;心功能不全;下肢动脉粥样硬化	治愈	黄其杉	田乃锋	田乃锋	经皮椎骨成形术;椎骨活组织检查
14567	O210脊柱外科	2024-09-17	2024-09-26	3549373	余山弟	1	40Y	腰椎骨折	腰椎扭伤和劳损	治愈	徐晖	徐晖	徐晖	腰椎骨折切开复位内固定术;腰椎后柱融合术，后入路;2-3个椎骨融合或再融合
14568	O210脊柱外科	2024-09-17	2024-09-27	3549600	金岳弟	1	82Y	腰椎骨折	骨质疏松伴有病理性骨折;腹主动脉夹层;胃部分后天性缺失;结肠恶性肿瘤;结肠术后;肺肿物;肺大疱;肝囊肿;胆总管扩张;肾错构瘤	治愈	徐晖	徐晖	徐晖	腰椎骨折球囊扩张成形术
14569	O210脊柱外科	2024-09-21	2024-09-27	3549603	黄成花	2	71Y	腰椎骨折L4	高脂血症;肺肿物;脂肪肝;心功能不全;下肢动脉粥样硬化	治愈	黄其杉	田乃锋	田乃锋	腰椎骨折球囊扩张成形术
14570	O210脊柱外科	2024-09-18	2024-09-27	3549605	陈新典	1	29Y	腰椎骨折	腰椎扭伤和劳损;肺挫伤;脊柱血管瘤;脂肪肝;前列腺结石	治愈	徐晖	徐晖	徐晖	腰椎后柱融合术，后入路;2-3个椎骨融合或再融合;腰椎骨折切开复位内固定术
14571	O210脊柱外科	2024-09-15	2024-09-27	3549626	代辉	1	52Y	枢椎骨折伴脱位(Hangman 骨折)	胸椎骨折;四根以上肋骨骨折不伴第一肋骨骨折;头皮裂伤;肺肿物;肺气肿	治愈	倪文飞	吴爱悯	吴爱悯	前入路颈椎融合术;2-3个椎骨融合或再融合;金属脊椎融合物置入术;前入路颈椎间盘切除术;胸椎骨折切开复位内固定术
14572	O210脊柱外科	2024-09-23	2024-09-27	3549697	戴玲弟	2	71Y	胸椎骨折	骨质疏松;高血压;脂肪肝;胆囊结石;心功能不全;下肢动脉粥样硬化	治愈	黄其杉	田乃锋	田乃锋	胸椎骨折球囊扩张成形术;椎骨活组织检查
14573	O210脊柱外科	2024-09-22	2024-09-28	3549973	林加坤	1	59Y	腰椎骨折	腰部脊髓损伤;胸椎骨折T11/T12;不完全截瘫	治愈	倪文飞	吴爱悯	吴爱悯	腰椎骨折切开复位内固定术
14574	O210脊柱外科	2024-09-21	2024-09-28	3549976	陈彩英	2	62Y	胸椎骨折	骨质疏松;脂肪肝;肾结石;下肢动脉粥样硬化;肝钙化灶;肺肿物	治愈	倪文飞	吴爱悯	吴爱悯	胸椎骨折球囊扩张成形术;椎骨活组织检查
14575	O210脊柱外科	2024-09-21	2024-09-28	3549986	蔡娟妹	2	77Y	腰椎骨折	胸椎棘突骨折;骨质疏松;高血压;2型糖尿病;头皮血肿;心功能不全;乙型病毒性肝炎	治愈	黄其杉	田乃锋	田乃锋	腰椎骨折球囊扩张成形术
14576	O210脊柱外科	2024-09-21	2024-09-28	3549991	郑爱琴	2	63Y	腰椎骨折	肺肿物;骨质疏松;心功能不全	治愈	黄其杉	田乃锋	田乃锋	经皮椎骨成形术
14577	O210脊柱外科	2024-09-21	2024-09-28	3550006	周岩森	1	72Y	胸椎多处骨折	骨质疏松;脂肪肝;胆囊结石;心功能不全;下肢动脉粥样硬化;肺肿物	治愈	黄其杉	田乃锋	田乃锋	胸椎骨折球囊扩张成形术
14578	O210脊柱外科	2024-09-22	2024-09-29	3550319	刘秋华	2	80Y	多发性腰椎骨折	胸椎骨折;骨质疏松伴有病理性骨折;高血压;弥漫大B细胞淋巴瘤;陈旧性肋骨骨折;下肢动脉粥样硬化;下肢静脉肌间血栓形成;主动脉钙化	治愈	徐晖	徐晖	徐晖	腰椎骨折球囊扩张成形术;胸椎骨折球囊扩张成形术;椎骨活组织检查
14579	O210脊柱外科	2024-09-24	2024-09-29	3550370	陈淑琴	2	53Y	胸椎骨折	脊柱血管瘤;心功能不全;脂肪肝;肺肿物	治愈	黄其杉	田乃锋	田乃锋	胸椎骨折球囊扩张成形术
14580	O210脊柱外科	2024-09-25	2024-09-30	3551007	王爱菊	2	68Y	胸椎骨折	骨质疏松;高血压;脂肪肝;主动脉钙化;冠状动脉粥样硬化	治愈	倪文飞	吴爱悯	吴爱悯	经皮穿刺脊柱后凸成形术;椎骨活组织检查
14581	O210脊柱外科	2024-09-24	2024-09-30	3551009	王池娒	1	71Y	胸椎骨折	骨质疏松;腰椎术后;高血压;前列腺增生;前列腺结石;左房扩大	治愈	倪文飞	吴爱悯	吴爱悯	胸椎骨折球囊扩张成形术;椎骨活组织检查
14582	O210脊柱外科	2024-09-26	2024-09-30	3551014	林应保	1	61Y	腰椎骨折	骨质疏松;先天性第五腰椎骶化;黄韧带肥厚;骨质增生;高血压;脂肪肝;前列腺结石	治愈	徐晖	徐晖	徐晖	腰椎骨折球囊扩张成形术;椎骨活组织检查
14583	O210脊柱外科	2024-09-21	2024-09-30	3551015	赵宜洗	1	29Y	腰椎骨折	胆囊息肉	治愈	倪文飞	吴爱悯	吴爱悯	腰椎骨折切开复位内固定术
14584	O210脊柱外科	2024-09-22	2024-09-30	3551017	王叔垟	1	50Y	取除骨折内固定装置	脊柱损伤后遗症;脂肪肝;肝囊肿;前列腺结石;肺大疱	其他	倪文飞	吴爱悯	吴爱悯	脊柱内固定装置去除术
14585	O210脊柱外科	2024-09-18	2024-09-30	3551018	王伯根	1	57Y	枢椎骨折	肩胛骨骨折;尺骨茎突骨折伴桡骨远端骨折;三角骨骨折;腕关节积液;腰椎骨折L1;清创术后;前列腺增生;前列腺结石;心功能不全	治愈	黄其杉	田乃锋	田乃锋	肩胛骨骨折切开复位钢板内固定术;桡骨骨折切开复位钢板内固定术;关节软骨修复术;前入路颈椎融合术;前入路颈椎间盘切除术;2-3个椎骨融合或再融合;金属脊椎融合物置入术
14586	O210脊柱外科	2024-09-29	2024-10-01	3551454	朱林标	1	71Y	胸椎骨折	慢性肾脏病5期;2型糖尿病;高血压;肝硬化;脾大;胆囊结石;下肢动脉粥样硬化	治愈	倪文飞	吴爱悯	吴爱悯	胸椎骨折球囊扩张成形术;椎骨活组织检查
14587	O210脊柱外科	2024-09-22	2024-10-01	3551537	刘化典	1	61Y	腰椎骨折	腰椎椎管狭窄;肝囊肿;肝血管瘤;肝钙化灶;前列腺增生;前列腺结石;主动脉钙化	治愈	倪文飞	吴爱悯	吴爱悯	腰椎骨折切开复位内固定术
14588	O210脊柱外科	2024-09-27	2024-10-02	3551822	钱连英	2	86Y	胸椎骨折	骨质疏松;肺动脉高压;脂肪肝;胆囊结石;后天性肾囊肿;肺肿物;主动脉钙化;糖尿病;冠状动脉粥样硬化	治愈	倪文飞	吴爱悯	吴爱悯	胸椎骨折球囊扩张成形术;椎骨活组织检查
14589	O210脊柱外科	2024-09-29	2024-10-02	3551824	郑珍敏	2	60Y	腰椎骨折	肝囊肿;心包积液	治愈	倪文飞	吴爱悯	吴爱悯	腰椎骨折球囊扩张成形术;椎骨活组织检查
14590	O210脊柱外科	2024-09-28	2024-10-03	3552071	马达美	2	50Y	取除骨折内固定装置	肾结石;肺肿物	其他	黄其杉	田乃锋	田乃锋	脊柱内固定装置去除术
14591	O210脊柱外科	2024-09-30	2024-10-04	3552283	余细绿	2	76Y	多发性腰椎骨折	心功能不全;脂肪肝;胆囊结石;后天性肾囊肿;骨质疏松	治愈	黄其杉	黄其杉	田乃锋	腰椎骨折球囊扩张成形术
14592	O210脊柱外科	2024-09-29	2024-10-05	3552530	曹张味	2	76Y	胸椎骨折	高血压;脑卒中后遗症;心功能不全;下肢动脉粥样硬化;胸腔积液;肺肿物	治愈	黄其杉	黄其杉	田乃锋	胸椎骨折球囊扩张成形术
14593	O210脊柱外科	2024-09-25	2024-10-05	3552534	尚相云	2	73Y	胸椎多处骨折	腰椎骨折;肋骨多处骨折;胸腔积液;肺肿物;头皮血肿;上颌窦炎;心功能不全	治愈	黄其杉	田乃锋	田乃锋	胸椎骨折球囊扩张成形术;腰椎骨折球囊扩张成形术;椎骨活组织检查
14594	O210脊柱外科	2024-09-26	2024-10-08	3553367	邹嫦娟	2	65Y	腰椎骨折	胸椎骨折;胸部挫伤;骨质疏松;窦性心动过缓;股静脉血栓形成;肝囊肿;肺肿物;肝脂肪瘤	治愈	徐晖	徐晖	徐晖	腰椎骨折切开复位内固定术;胸椎骨折切开复位内固定术;腰椎植骨术
14595	O210脊柱外科	2024-09-25	2024-10-08	3553370	吴德有	1	44Y	腰椎骨折	腰椎椎管狭窄;马尾损伤;肺挫伤;脂肪肝	治愈	徐晖	徐晖	徐晖	腰椎骨折切开复位内固定术;腰椎植骨术
14596	O210脊柱外科	2024-10-06	2024-10-09	3553635	郑少萍	2	55Y	腰椎骨折	骨质疏松;肝囊肿;肺肿物	治愈	倪文飞	吴爱悯	吴爱悯	腰椎骨折球囊扩张成形术;椎骨活组织检查
14597	O210脊柱外科	2024-10-06	2024-10-09	3553650	赵爱莲	2	64Y	腰椎骨折	高血压;睡眠障碍;骨质疏松;心功能不全;肾结石;胸腔积液;乳腺术后	好转	黄其杉	田乃锋	田乃锋
14598	O210脊柱外科	2024-10-02	2024-10-09	3553651	缪莉平	2	56Y	胸椎骨折	肺肿物;后天性肾囊肿;蝶窦炎	治愈	黄其杉	田乃锋	田乃锋	胸椎骨折球囊扩张成形术
14599	O210脊柱外科	2024-10-03	2024-10-10	3553983	周彩英	2	63Y	胸椎骨折	腰椎骨折;骨质疏松伴有病理性骨折;腰椎间盘突出;脊椎前移;腰椎退行性病变;胆囊结石;后天性肾囊肿;主动脉瓣钙化	治愈	武垚森	武垚森	王胜	胸椎骨折球囊扩张成形术;腰椎骨折球囊扩张成形术
14600	O210脊柱外科	2024-10-05	2024-10-10	3554090	蔡碎媚	2	52Y	腰椎间盘突出	陈旧性肋骨骨折	好转	黄其杉	田乃锋	田乃锋
14601	O210脊柱外科	2024-09-15	2024-10-12	3554584	谢银春	2	61Y	胸部脊髓损伤	胸椎多处骨折;急性截瘫;多发性腰椎骨折;肋骨多处骨折;肺部阴影;肺挫伤;脂肪肝;头皮血肿;真菌性上颌窦炎;心功能不全;下腔静脉血栓形成;高血压	好转	黄其杉	田乃锋	田乃锋	胸椎骨折切开复位内固定术;胸椎融合术，后入路;2-3个椎骨融合或再融合;胸椎骨折球囊扩张成形术;腰椎骨折球囊扩张成形术;胸椎椎板切除减压术
14602	O210脊柱外科	2024-10-06	2024-10-12	3554600	钱余妹	2	82Y	胸椎骨折	脊椎前移;椎管内蛛网膜囊肿;骨质疏松;肺肿物;心功能不全;肝钙化灶	治愈	黄其杉	田乃锋	田乃锋	胸椎骨折球囊扩张成形术
14603	O210脊柱外科	2024-10-05	2024-10-12	3554605	缪阿梅	2	65Y	胸椎骨折	肝囊肿;肾结石;心功能不全;下肢动脉粥样硬化;高血压	治愈	黄其杉	田乃锋	田乃锋	胸椎骨折球囊扩张成形术
14604	O210脊柱外科	2024-10-02	2024-10-12	3554609	黄丽堂	2	48Y	胸椎骨折	骨质疏松;胆囊息肉;肩关节扭伤;肩关节积液;冈上肌肌腱损伤;肱骨骨囊肿	治愈	倪文飞	吴爱悯	吴爱悯	胸椎骨折切开复位内固定术
14605	O210脊柱外科	2024-10-07	2024-10-12	3554616	朱宝翠	2	83Y	腰椎骨折	骨质疏松;腰椎峡部裂;陈旧性胸椎骨折;下肢动脉粥样硬化;胆囊结石;脊椎前移	治愈	倪文飞	吴爱悯	吴爱悯	椎骨活组织检查;腰椎骨折球囊扩张成形术
14606	O210脊柱外科	2024-10-07	2024-10-12	3554617	叶守娟	2	68Y	胸椎骨折	骨质疏松;高血压;胆囊结石;下肢动脉粥样硬化	治愈	倪文飞	吴爱悯	吴爱悯	胸椎骨折球囊扩张成形术;椎骨活组织检查
14607	O210脊柱外科	2024-10-05	2024-10-12	3554690	施四国	1	34Y	取除骨折内固定装置	脊髓损伤后遗症;肺肿物;慢性乙型病毒性肝炎;慢性肝病	其他	黄其杉	田乃锋	田乃锋	脊柱内固定装置去除术;跟骨内固定物取出术
14608	O210脊柱外科	2024-10-07	2024-10-13	3555018	陈亦霞	2	75Y	腰椎骨折	骨质疏松;高血压;心功能不全;老年性脑萎缩;胸腔积液	治愈	黄其杉	田乃锋	田乃锋	经皮椎骨成形术
14609	O210脊柱外科	2024-10-09	2024-10-14	3555401	徐飞莺	2	55Y	胸椎骨折	骨质疏松	治愈	倪文飞	吴爱悯	吴爱悯	胸椎骨折球囊扩张成形术;椎骨活组织检查
14610	O210脊柱外科	2024-10-03	2024-10-14	3555457	周建平	1	55Y	腰椎骨折	外伤性牙齿缺失;肋骨骨折;脂肪肝;前列腺结石;胸腔积液;主动脉瓣钙化	治愈	倪文飞	吴爱悯	吴爱悯	腰椎骨折切开复位内固定术
14611	O210脊柱外科	2024-10-10	2024-10-16	3556237	金长中	1	36Y	取除骨折内固定装置	肝囊肿	其他	黄其杉	田乃锋	田乃锋	脊柱内固定装置去除术
14612	O210脊柱外科	2024-10-07	2024-10-16	3556241	钟彩娇	2	68Y	胸椎骨折	腰椎术后;脂肪肝;后天性肾囊肿;心功能不全	治愈	黄其杉	田乃锋	田乃锋	胸椎骨折球囊扩张成形术
14613	O210脊柱外科	2024-10-06	2024-10-16	3556248	周秀燕	2	54Y	胸椎骨折	腰椎骨折L4;骨质疏松;肝囊肿	治愈	倪文飞	吴爱悯	吴爱悯	胸椎骨折切开复位内固定术;腰椎骨折球囊扩张成形术
14614	O210脊柱外科	2024-10-12	2024-10-16	3556304	郑月花	2	85Y	骨质疏松伴有病理性骨折	胸椎术后;腰椎术后;胸椎楔形变;脊柱侧弯;脊柱后凸;食管裂孔疝;贫血;胃炎;肺肿物;纵隔肿物;后天性肾囊肿;下肢动脉粥样硬化;胆囊结石	好转	徐晖	徐晖	徐晖	腰椎骨折球囊扩张成形术
14615	O210脊柱外科	2024-10-10	2024-10-16	3556308	林淑英	2	74Y	腰椎骨折	骨质疏松;帕金森病;脂肪肝;主动脉钙化;肺钙化;下肢静脉曲张;退行性主动脉瓣疾患;冠状动脉粥样硬化;胸膜肥厚	治愈	倪文飞	吴爱悯	吴爱悯	腰椎骨折球囊扩张成形术;椎骨活组织检查
14616	O210脊柱外科	2024-10-09	2024-10-16	3556317	陈少玲	2	49Y	腰椎骨折	心包积液;胸腔积液;多发性肝囊肿	治愈	倪文飞	吴爱悯	吴爱悯	腰椎骨折切开复位内固定术
14617	O210脊柱外科	2024-10-08	2024-10-17	3556739	夏秋仙	2	56Y	取除骨折内固定装置	胸椎后纵韧带骨化;肺肿物	其他	徐晖	徐晖	徐晖	脊柱内固定装置去除术
14618	O210脊柱外科	2024-10-14	2024-10-19	3557445	吴玉吾	1	92Y	腰椎骨折	骨质疏松;冠状动脉粥样硬化;肝囊肿;后天性肾囊肿;前列腺增生;下肢动脉粥样硬化;肺肿物	治愈	倪文飞	吴爱悯	吴爱悯	腰椎骨折球囊扩张成形术;椎骨活组织检查
14619	O210脊柱外科	2024-10-13	2024-10-19	3557524	王锦霞	2	66Y	腰椎骨折	骨质疏松;腰骶椎间盘突出;下肢动脉粥样硬化;特发性肺纤维化;主动脉钙化;冠状动脉粥样硬化	治愈	倪文飞	吴爱悯	吴爱悯	腰椎骨折球囊扩张成形术;椎骨活组织检查
14620	O210脊柱外科	2024-10-05	2024-10-21	3558341	冯德海	1	48Y	腰椎骨折	脂肪肝;肺肿物	治愈	倪文飞	吴爱悯	吴爱悯	腰椎骨折切开复位内固定术
14621	O210脊柱外科	2024-10-16	2024-10-22	3558723	黄尚娥	2	76Y	胸椎骨折	陈旧性胸椎骨折;腰椎术后;下肢动脉粥样硬化;肝钙化灶;肝囊肿;心功能不全	治愈	黄其杉	田乃锋	田乃锋	经皮椎骨成形术
14622	O210脊柱外科	2024-10-17	2024-10-23	3558380	郭宝珍	2	57Y	腰椎骨折	骨质疏松;脊柱血管瘤	治愈	徐晖	徐晖	徐晖	腰椎骨折球囊扩张成形术;椎骨活组织检查
14623	O210脊柱外科	2024-10-16	2024-10-23	3559251	郑金钗	2	64Y	胸椎骨折	骨质疏松;下肢动脉粥样硬化;心功能不全;脂肪肝;胸腔积液	治愈	黄其杉	田乃锋	田乃锋	经皮椎骨成形术
14624	O210脊柱外科	2024-10-10	2024-10-23	3559253	钱茂云	1	59Y	枢椎骨折	胸椎多处骨折;肋骨多处骨折;前列腺囊肿;创伤性湿肺;气胸;胸腔积液;肺不张	治愈	倪文飞	吴爱悯	吴爱悯	前入路颈椎融合术;前入路颈椎间盘切除术;2-3个椎骨融合或再融合;金属脊椎融合物置入术;胸椎骨折切开复位内固定术
14625	O210脊柱外科	2024-10-16	2024-10-23	3559275	胡松妹	2	82Y	骨质疏松伴有病理性骨折	脊柱术后;后天性肾囊肿;下肢静脉血栓形成;食管裂孔疝	治愈	倪文飞	吴爱悯	吴爱悯	胸椎骨折球囊扩张成形术;椎骨活组织检查
14626	O210脊柱外科	2024-10-19	2024-10-24	3559589	张仁宣	1	57Y	取除骨折内固定装置	高血压;下肢动脉粥样硬化;脂肪肝;肝囊肿;胆囊息肉;后天性肾囊肿;心功能不全;肺肿物	其他	黄其杉	田乃锋	田乃锋	脊柱内固定装置去除术
14627	O210脊柱外科	2024-10-20	2024-10-25	3559946	林祥来	1	55Y	多发性腰椎骨折	骨质疏松;脂肪肝;前列腺增生;肺肿物	治愈	倪文飞	吴爱悯	吴爱悯	腰椎骨折球囊扩张成形术;椎骨活组织检查
14628	O210脊柱外科	2024-10-22	2024-10-26	3560310	李圣乐	1	54Y	取除骨折内固定装置	股骨骨折不连接;肺大疱;脂肪肝;肾超声检查异常	其他	余可和	余可和	汪吉棋	尺骨内固定装置去除术;皮肤瘢痕切除术
14629	O210脊柱外科	2024-10-22	2024-10-26	3560311	袁伟伟	2	52Y	取除骨折内固定装置	二尖瓣反流;肺肿物;心功能不全	其他	余可和	余可和	汪吉棋	跖骨内固定装置去除术;皮肤瘢痕切除术
14630	O210脊柱外科	2024-10-18	2024-10-26	3560321	张意昂	1	66Y	腰椎骨折L1	骨质疏松;下肢动脉粥样硬化;下肢静脉肌间血栓形成;肺肿物;肺气肿	治愈	黄其杉	田乃锋	田乃锋	腰椎骨折球囊扩张成形术
14631	O210脊柱外科	2024-10-21	2024-10-26	3560333	周赛秋	2	43Y	取除骨折内固定装置	骨折术后	其他	黄其杉	田乃锋	田乃锋	脊柱内固定装置去除术;跟骨内固定物取出术
14632	O210脊柱外科	2024-10-03	2024-10-26	3560340	金香玉	2	56Y	胸椎多处骨折	腰椎骨折;骨质疏松;清创术后;多处挫伤;高血压;肝囊肿;肾结石;甲状腺术后	好转	徐晖	徐晖	徐晖	胸椎骨折切开复位内固定术;腰椎骨折切开复位内固定术;胸椎融合术，后入路;腰椎后柱融合术，后入路;2-3个椎骨融合或再融合
14633	O210脊柱外科	2024-10-20	2024-10-26	3560351	林志金	1	82Y	腰椎骨折L1	高血压;冠状动脉支架植入后状态;心功能不全;后天性肾囊肿	治愈	黄其杉	田乃锋	田乃锋	腰椎骨折球囊扩张成形术
14634	O210脊柱外科	2024-10-18	2024-10-28	3561230	黄爱芬	2	49Y	骨质疏松伴有病理性骨折	甲状腺功能亢进症;肾结石	治愈	黄其杉	田乃锋	田乃锋	腰椎骨折球囊扩张成形术;胸椎骨折球囊扩张成形术
14635	O210脊柱外科	2024-10-26	2024-10-29	3561563	宦仁海	1	56Y	腰椎骨折	下肢动脉粥样硬化;肝钙化灶;前列腺增生	好转	黄其杉	田乃锋	田乃锋
14636	O210脊柱外科	2024-10-26	2024-10-31	3562497	周国兰	2	72Y	胸椎骨折	胸椎术后;骨质疏松;下肢动脉粥样硬化	治愈	倪文飞	吴爱悯	吴爱悯	胸椎骨折球囊扩张成形术;椎骨活组织检查
14637	O210脊柱外科	2024-10-31	2024-11-01	3562801	孔二红	1	49Y	颈部脊髓损伤	颈椎间盘突出;颈椎椎管狭窄;慢性鼻窦炎;面部挫伤;多处挫伤;高血压;脂肪肝;筛窦骨折	未愈	毛方敏	毛方敏	许聪
14638	O210脊柱外科	2024-10-17	2024-11-02	3563055	陈玉芝	2	63Y	胸椎骨折	骨质疏松;脂肪肝;后天性肾囊肿;胸腔积液;肺部感染	治愈	倪文飞	吴爱悯	吴爱悯	胸椎骨折切开复位内固定术
14639	O210脊柱外科	2024-10-14	2024-11-03	3563375	陈素芬	2	51Y	颈椎骨折	颈部脊髓损伤;急性不完全性四肢瘫;颈椎椎管狭窄;胸腔积液;肺肿物	治愈	倪文飞	吴爱悯	吴爱悯	前入路颈椎融合术;椎体次全切除伴椎间盘切除术;2-3个椎骨融合或再融合;金属脊椎融合物置入术;颅骨牵引术
14640	O210脊柱外科	2024-11-02	2024-11-04	3563722	胡惠兰	2	86Y	胸椎骨折	腰椎骨折;骨质疏松;肾衰竭	治愈	倪文飞	吴爱悯	吴爱悯	胸椎骨折球囊扩张成形术;腰椎骨折球囊扩张成形术;椎骨活组织检查
14641	O210脊柱外科	2024-10-28	2024-11-04	3563811	麻美柳	2	69Y	骨质疏松伴有病理性骨折	骨折术后;大腿挫伤;半月板撕裂，近期的;膝关节前十字韧带损伤;膝关节积液;心功能不全;肺部感染;胸腔积液;肺肿物;后天性肾囊肿;下肢静脉曲张	治愈	黄其杉	田乃锋	田乃锋	经皮椎骨成形术
14642	O210脊柱外科	2024-10-23	2024-11-04	3563827	黄松柳	2	62Y	腰椎间盘突出	脊椎前移;趾骨骨折;心功能不全;脂肪肝	治愈	黄其杉	田乃锋	田乃锋	腰椎椎体间融合术，后入路;2-3个椎骨融合或再融合;金属脊椎融合物置入术;腰椎间盘切除伴椎管减压术
14643	O210脊柱外科	2024-10-30	2024-11-05	3564269	周秋兰	2	56Y	胸椎骨折	腰椎骨折;骨质疏松;脊椎退行性病变;肺部感染;肺肿物;肝钙化灶	治愈	徐晖	徐晖	徐晖	胸椎骨折球囊扩张成形术;腰椎骨折球囊扩张成形术;椎骨活组织检查
14644	O210脊柱外科	2024-10-28	2024-11-06	3564687	郑庆祝	1	67Y	腰椎骨折	肝囊肿;后天性肾囊肿;肾结石;肺部感染	治愈	倪文飞	吴爱悯	吴爱悯	腰椎骨折切开复位内固定术
14645	O210脊柱外科	2024-10-27	2024-11-06	3564689	黄建东	1	48Y	胸椎骨折	多发性腰椎骨折;面部软组织挫伤;高血压;慢性乙型病毒性肝炎;肝硬化;肝占位性病变;脾大;胆囊结石;肾结石;后天性肾囊肿;输尿管扩张;前列腺增生;前列腺结石;肺肿物;肺大疱;气管憩室;筛窦炎	治愈	徐晖	徐晖	徐晖	胸椎融合术，后入路;2-3个椎骨融合或再融合;胸椎骨折切开复位内固定术
14646	O210脊柱外科	2024-11-02	2024-11-06	3564693	柯晓云	2	70Y	多发性腰椎骨折	骨质疏松;高血压;冠状动脉粥样硬化性心脏病;冠状动脉支架植入后状态;心功能不全;甲状腺术后;肺肿物	治愈	黄其杉	田乃锋	田乃锋	腰椎骨折球囊扩张成形术;椎骨活组织检查
14647	O210脊柱外科	2024-10-28	2024-11-07	3565121	王锦梁	1	87Y	病理性骨折，不可归类在他处者	人工髋关节;肺气肿合并肺大泡;心功能不全;下肢动脉粥样硬化;后天性肾囊肿;前列腺结石	治愈	黄其杉	田乃锋	田乃锋	经皮椎骨成形术
14648	O210脊柱外科	2024-11-04	2024-11-07	3565136	朱良妹	2	58Y	腰椎骨折L1	骨质疏松;2型糖尿病;胆囊术后;乳腺术后	治愈	黄其杉	田乃锋	田乃锋	腰椎骨折球囊扩张成形术
14649	O210脊柱外科	2024-11-03	2024-11-07	3565166	吴文芳	2	63Y	胸椎骨折	骨质疏松;骨折术后;心功能不全;2型糖尿病;肺肿物;下肢动脉粥样硬化	治愈	黄其杉	田乃锋	田乃锋	经皮椎骨成形术
14650	O210脊柱外科	2024-11-04	2024-11-07	3565195	李金清	1	96Y	腰椎骨折	骨质疏松;高血压;前列腺增生;肺部感染;胸腔积液;冠状动脉粥样硬化	好转	倪文飞	吴爱悯	吴爱悯
14651	O210脊柱外科	2024-11-03	2024-11-08	3565433	干玲仙	2	75Y	腰椎骨折	骨质疏松;心功能不全;脂肪肝	治愈	黄其杉	田乃锋	田乃锋	经皮椎骨成形术
14652	O210脊柱外科	2024-11-05	2024-11-09	3565642	胡永花	2	84Y	骨质疏松伴有病理性骨折	高血压;脂肪肝;后天性肾囊肿;肝囊肿;胸腔积液;肺部阴影;肺的其他疾患	治愈	倪文飞	吴爱悯	吴爱悯	胸椎骨折球囊扩张成形术;椎骨活组织检查
14653	O210脊柱外科	2024-11-05	2024-11-09	3565735	丁金钗	2	73Y	腰椎骨折	骨折术后;骨质疏松;高血压;糖尿病;主动脉钙化;脂肪肝;肺部阴影;特发性肺纤维化;冠状动脉粥样硬化;下肢动脉粥样硬化;心房肥大	治愈	倪文飞	吴爱悯	吴爱悯	腰椎骨折球囊扩张成形术;椎骨活组织检查
14654	O210脊柱外科	2024-11-02	2024-11-09	3565743	李银娣	2	87Y	胸椎骨折	骨质疏松;特发性肺纤维化;主动脉钙化;下肢动脉粥样硬化;冠状动脉粥样硬化	治愈	倪文飞	吴爱悯	吴爱悯	胸椎骨折球囊扩张成形术;椎骨活组织检查
14655	O210脊柱外科	2024-10-30	2024-11-09	3565780	周庆新	1	59Y	腰椎骨折	肺肿物;坠积性肺炎;前列腺钙化灶	治愈	倪文飞	吴爱悯	吴爱悯	腰椎骨折切开复位内固定术
14656	O210脊柱外科	2024-10-27	2024-11-09	3565782	朱洪钢	1	41Y	多发性腰椎骨折	腰背部挫伤;腰椎退行性病变;胆囊息肉;肾结石	治愈	徐晖	徐晖	徐晖	腰椎骨折切开复位内固定术;腰椎后柱融合术，后入路;2-3个椎骨融合或再融合
14657	O210脊柱外科	2024-11-05	2024-11-09	3565809	韩红侠	2	36Y	寰椎骨折	交通性腹膜鞘突管积液;肺挫伤;多处挫伤	好转	徐晖	徐晖	徐晖
14658	O210脊柱外科	2024-11-02	2024-11-09	3565819	吴淑琴	2	64Y	取除骨折内固定装置	老年性骨质疏松;心功能不全;肺肿物;脂肪肝;肾结石	其他	黄其杉	田乃锋	田乃锋	脊柱内固定装置去除术
14659	O210脊柱外科	2024-11-01	2024-11-09	3565865	刘光松	1	62Y	颈部脊髓损伤	颈椎间盘突出;创伤性硬脑膜下出血;颅骨骨折;额骨骨折;双踝骨折;踝关节损伤;指骨骨折;高血压;心功能不全;下肢动脉粥样硬化;脂肪肝;前列腺增生	好转	黄其杉	田乃锋	田乃锋	前入路颈椎融合术;前入路颈椎间盘切除术;4-8个椎骨融合或再融合;金属脊椎融合物置入术;踝关节骨折切开复位钢板内固定术;踝融合术;关节软骨修复术
14660	O210脊柱外科	2024-10-24	2024-11-10	3566180	李恩珍	1	53Y	取除骨折内固定装置	心功能不全;肺肿物;甲状腺结节;脂肪肝;前列腺结石	其他	黄其杉	田乃锋	田乃锋	脊柱内固定装置去除术
14661	O210脊柱外科	2024-11-02	2024-11-10	3566205	金国真	1	53Y	胸椎骨折	胸椎脱位;脊髓损伤;截瘫;头部浅表损伤;肋骨多处骨折;肝钙化灶;前列腺增生;前列腺钙化灶;肺部阴影;肺的其他疾患	治愈	倪文飞	吴爱悯	吴爱悯	胸椎骨折切开复位内固定术;胸椎融合术，后入路;胸椎间盘切除伴椎板切除术;其他特指部位脱位的开放性复位术;2-3个椎骨融合或再融合
14662	O210脊柱外科	2024-11-03	2024-11-11	3566645	韩若设	1	56Y	腰椎骨折	胸椎骨折;肾结石;后天性肾囊肿;前列腺结石;陈旧性肺结核;肺的其他疾患	治愈	倪文飞	吴爱悯	吴爱悯	腰椎骨折切开复位内固定术;胸椎骨折切开复位内固定术
14663	O210脊柱外科	2024-10-07	2024-11-11	3566656	郑元妹	2	61Y	腰椎结核	病理性骨折，不可归类在他处者;肺部感染;肺肿物;肺钙化;胆囊胆固醇沉着症;后天性肾囊肿;特发性肺纤维化;腰椎后凸;骨质破坏;诊断性影像检查的异常所见，其他特指身体结构的	好转	倪文飞	吴爱悯	吴爱悯	椎骨活组织检查;腰椎病损切除术;腰椎骨折切开复位内固定术;髂骨切除术用作移植物;腰椎植骨术;腰椎后柱融合术，后入路;2-3个椎骨融合或再融合
14664	O210脊柱外科	2024-10-30	2024-11-11	3566659	刘碎俊	1	46Y	取除骨折内固定装置	脂肪肝;后天性肾囊肿;下肢动脉粥样硬化;肺肿物	其他	徐晖	徐晖	徐晖	脊柱内固定装置去除术;桡骨内固定装置去除术;皮肤瘢痕切除术
14665	O210脊柱外科	2024-11-03	2024-11-11	3566662	邱宗树	1	50Y	多发性腰椎骨折	心功能不全;后天性肾囊肿;前列腺结石	治愈	黄其杉	田乃锋	田乃锋	腰椎骨折切开复位内固定术;腰椎后柱融合术，后入路;2-3个椎骨融合或再融合
14666	O210脊柱外科	2024-11-03	2024-11-11	3566822	徐财水	1	63Y	腰椎骨折L3	多发性脑梗死;头部的损伤;心功能不全;肺肿物;纵隔淋巴结肿大;肝囊肿;肾结石;下肢静脉曲张	好转	黄其杉	田乃锋	田乃锋	腰椎骨折球囊扩张成形术
14667	O210脊柱外科	2024-11-06	2024-11-12	3567134	吴秀理	2	87Y	胸椎骨折T11/T12	骨质疏松;高血压;心功能不全;脂肪肝;后天性肾囊肿;脑梗死后遗症;冠状动脉粥样硬化性心脏病;下肢动脉粥样硬化闭塞症	治愈	黄其杉	田乃锋	田乃锋	胸椎骨折球囊扩张成形术
14668	O210脊柱外科	2024-11-04	2024-11-12	3567138	张爱莲	2	62Y	脊椎前移	腰椎椎管狭窄;腰椎间盘突出;桡骨远端骨折;腕关节积液;肺肿物;特发性肺纤维化;下肢动脉粥样硬化;主动脉钙化;冠状动脉粥样硬化;乳腺钙化	治愈	倪文飞	吴爱悯	吴爱悯	腰椎椎体间融合术，后入路;2-3个椎骨融合或再融合;金属脊椎融合物置入术;腰椎间盘切除伴椎板切除术
14669	O210脊柱外科	2024-11-09	2024-11-12	3567143	潘统杰	1	54Y	腰椎间盘突出	骨折术后;下肢动脉粥样硬化;肺肿物	治愈	黄其杉	田乃锋	田乃锋	内镜下腰椎髓核切除术;经皮椎间盘电热纤维环成形术(IDET)
14670	O210脊柱外科	2024-11-07	2024-11-12	3567156	王阿珠	2	91Y	腰椎骨折L1	人工髋关节;心功能不全;后天性肾囊肿;肾结石;下肢动脉粥样硬化闭塞症;脊柱血管瘤;下肢静脉曲张	治愈	黄其杉	田乃锋	田乃锋	腰椎骨折球囊扩张成形术
14671	O210脊柱外科	2024-11-09	2024-11-13	3567583	李金清	1	96Y	腰椎骨折	骨质疏松;高血压;冠状动脉粥样硬化;前列腺增生;肺的其他疾患;心脏肥大;主动脉钙化;主动脉瓣钙化;胸腔积液;肺不张;食管扩张;下肢动脉粥样硬化;下肢静脉曲张	治愈	倪文飞	吴爱悯	吴爱悯	腰椎骨折球囊扩张成形术;椎骨活组织检查
14672	O210脊柱外科	2024-11-03	2024-11-13	3567585	汤春花	2	74Y	腰骶椎间盘突出	脊柱血管瘤;颈椎间盘突出;高血压;心功能不全;脑梗死后遗症;抑郁发作;下肢动脉粥样硬化;后天性肾囊肿;自发性骨折	治愈	黄其杉	田乃锋	田乃锋	腰骶椎椎体间融合术，后入路;2-3个椎骨融合或再融合;金属脊椎融合物置入术;腰椎间盘切除伴椎管减压术;腰椎骨折球囊扩张成形术
14673	O210脊柱外科	2024-11-10	2024-11-14	3568038	陈金妹	2	71Y	腰椎骨折	腰部软组织损伤;高血压;脂肪肝;肝囊肿;胆囊结石;后天性肾囊肿;下肢动脉粥样硬化	治愈	黄其杉	田乃锋	田乃锋	经皮椎骨成形术
14674	O210脊柱外科	2024-11-09	2024-11-15	3568253	周寿月	2	64Y	腰椎骨折	骨质疏松;高血压;心功能不全;肺肿物;脂肪肝;肝囊肿	治愈	黄其杉	田乃锋	田乃锋	腰椎骨折球囊扩张成形术
14675	O210脊柱外科	2024-11-12	2024-11-16	3568549	杨太昌	1	58Y	腰椎骨折	高血压;2型糖尿病;肺肿物;肺气肿;肝囊肿;心功能不全;后天性肾囊肿	治愈	黄其杉	田乃锋	田乃锋	腰椎骨折球囊扩张成形术
14676	O210脊柱外科	2024-11-14	2024-11-17	3569100	池广睿	1	19Y	腰椎骨折L2	腰椎间盘突出	未愈	林焱	许聪	许聪
14677	O210脊柱外科	2024-11-02	2024-11-17	3569108	林伟玲	2	58Y	颈椎椎管狭窄	颈椎间盘突出;陈旧性胸椎骨折;骨质疏松;高血压	治愈	倪文飞	吴爱悯	吴爱悯	前入路颈椎融合术;前入路颈椎间盘切除术;金属脊椎融合物置入术;4-8个椎骨融合或再融合
14678	O210脊柱外科	2024-11-12	2024-11-18	3569457	陈岩虎	1	95Y	腰椎骨折	骨质疏松;高血压;帕金森综合征;肝回声不均;后天性肾囊肿;前列腺增生;心律失常;前列腺结石;肾超声检查异常	治愈	倪文飞	吴爱悯	吴爱悯	腰椎骨折球囊扩张成形术;椎骨活组织检查
14679	O210脊柱外科	2024-11-16	2024-11-18	3569482	郑送叶	2	79Y	病理性骨折，不可归类在他处者	脂肪肝;后天性肾囊肿;肾结石;下肢动脉粥样硬化;心功能不全;肺肿物	治愈	黄其杉	田乃锋	田乃锋	胸椎骨折球囊扩张成形术;椎骨活组织检查
14680	O210脊柱外科	2024-11-16	2024-11-18	3569586	黄锦美	2	72Y	胸椎骨折	骨质疏松;帕金森病;心功能不全;胆囊结石;肺炎	治愈	黄其杉	田乃锋	田乃锋	胸椎骨折球囊扩张成形术
14681	O210脊柱外科	2024-11-08	2024-11-18	3569593	邵领照	2	74Y	胸椎多处骨折	胸部脊髓损伤;创伤性截瘫;颈部脊髓损伤;肱骨干骨折;肱骨头骨折;肩关节脱位;肋骨多处骨折;胸腔积液;心功能不全;脂肪肝;老年性脑萎缩;肺肿物;下肢动脉粥样硬化;下肢静脉肌间血栓形成	治愈	黄其杉	田乃锋	田乃锋	胸椎骨折切开复位内固定术;胸椎融合术，后入路;4-8个椎骨融合或再融合;肱骨骨折切开复位钢板内固定术;肱骨植骨术;肩关节脱位手法整复术
14682	O210脊柱外科	2024-11-12	2024-11-19	3569900	厉细蜜	2	57Y	胸椎骨折	骨质疏松;腰椎间盘突出;脊椎退行性病变;肺肿物;胸腔积液	治愈	徐晖	徐晖	徐晖	经皮椎骨成形术
14683	O210脊柱外科	2024-11-15	2024-11-19	3569948	周碎弟	2	72Y	胸椎骨折	骨质疏松;腰椎峡部裂;脊椎前移;脊椎退行性病变;老年性心脏瓣膜病;胆囊结石;肾积水伴肾结石;肾盂扩张;肺肿物	治愈	武垚森	王胜	王胜	经皮椎骨成形术
14684	O210脊柱外科	2024-11-13	2024-11-19	3569973	黄冬兰	2	77Y	胸椎压缩性骨折	骨质疏松;腰椎间盘突出;高血压;脊柱后凸;陈旧性胸椎骨折;胸腔积液;脊柱侧弯	好转	林焱	许聪	许聪	胸椎骨折球囊扩张成形术
14685	O210脊柱外科	2024-11-14	2024-11-19	3570013	金香弟	2	83Y	胸椎骨折	老年性骨质疏松;高血压;心功能不全;下肢动脉粥样硬化;肝回声不均	治愈	黄其杉	田乃锋	田乃锋	胸椎骨折球囊扩张成形术;椎骨活组织检查
14686	O210脊柱外科	2024-11-14	2024-11-20	3570337	陈秀钗	2	80Y	骨质疏松伴有病理性骨折	心功能不全;肺肿物;肝囊肿;肾结石;下肢动脉粥样硬化;甲状腺钙化	治愈	黄其杉	田乃锋	田乃锋	胸椎骨折球囊扩张成形术
14687	O210脊柱外科	2024-11-14	2024-11-20	3570340	林长胆	1	44Y	取除骨折内固定装置	肾结石;前列腺结石	其他	黄其杉	田乃锋	田乃锋	脊柱内固定装置去除术
14688	O210脊柱外科	2024-11-07	2024-11-20	3570343	任玉真	2	74Y	脊椎前移	腰椎间盘突出;腰椎椎管狭窄;骨质疏松;脂肪肝;肝钙化灶;后天性肾囊肿;高血压;陈旧性胸椎骨折;糖尿病不伴有并发症	治愈	倪文飞	吴爱悯	吴爱悯	腰椎椎体间融合术，后入路;2-3个椎骨融合或再融合;腰椎间盘切除伴椎板切除术;金属脊椎融合物置入术
14689	O210脊柱外科	2024-11-10	2024-11-20	3570444	陈杜娜	2	66Y	胸椎多处骨折	腰椎骨折L3;骨质疏松;肝回声不均;后天性肾囊肿;高血压	治愈	倪文飞	吴爱悯	吴爱悯	胸椎骨折球囊扩张成形术;腰椎骨折球囊扩张成形术
14690	O210脊柱外科	2024-11-16	2024-11-20	3570536	陈兰芬	2	75Y	骨质疏松伴有病理性骨折	高血压;2型糖尿病;高脂血症;脑梗死;帕金森病;睡眠障碍;心功能不全;脂肪肝;肾结石;肺恶性肿瘤;慢性支气管炎;肝钙化灶;肺部阴影	治愈	黄其杉	田乃锋	田乃锋	胸椎骨折球囊扩张成形术;椎骨活组织检查
14691	O210脊柱外科	2024-11-10	2024-11-21	3570806	黄丽金	2	39Y	腰椎骨折	跟骨骨折;肝钙化灶;跖骨骨折	治愈	倪文飞	吴爱悯	吴爱悯	腰椎骨折切开复位内固定术
14692	O210脊柱外科	2024-11-17	2024-11-23	3571429	王玉凤	2	71Y	胸椎骨折	骨质疏松;脊柱血管瘤;特发性(原发性)高血压;肝囊肿;胸腔积液;主动脉钙化;肺部感染;间质性肺病;冠状动脉粥样硬化	治愈	倪文飞	吴爱悯	吴爱悯	胸椎骨折球囊扩张成形术;椎骨活组织检查
14693	O210脊柱外科	2024-11-11	2024-11-23	3571443	陈梅红	2	64Y	胸椎多处骨折	骨质疏松;颈椎不稳定;颈部脊髓损伤;头皮裂伤;胃溃疡;肝回声不均;肝囊肿	治愈	倪文飞	吴爱悯	吴爱悯	胸椎骨折球囊扩张成形术;椎骨活组织检查
14694	O210脊柱外科	2024-11-17	2024-11-23	3571466	张可法	1	84Y	胸椎骨折	骨质疏松;前列腺增生;高血压;心功能不全;肝囊肿;胆囊结石;后天性肾囊肿;下肢动脉粥样硬化闭塞症;血管支架植入术后状态;膀胱憩室;糖尿病	治愈	倪文飞	吴爱悯	吴爱悯	椎骨活组织检查;胸椎骨折球囊扩张成形术
14695	O210脊柱外科	2024-11-13	2024-11-23	3571484	童静康	1	73Y	颈部脊髓损伤	颈椎间盘突出;颈椎椎管狭窄;颈椎骨折C3;高血压;脱髓鞘性脑病;脑缺血灶;腔隙性脑梗死;老年性脑萎缩;肺的其他疾患;胸腔积液;肺部阴影;肺钙化;主动脉钙化;冠状动脉粥样硬化;多发性肝囊肿	好转	倪文飞	吴爱悯	吴爱悯	前入路颈椎融合术;前入路颈椎间盘切除术;4-8个椎骨融合或再融合;金属脊椎融合物置入术
14696	O210脊柱外科	2024-11-02	2024-11-24	3571848	张先亮	1	64Y	胸椎骨折	腰椎骨折;胸椎脱位;创伤性截瘫;脊髓损伤;肋骨多处骨折;主动脉钙化;冠状动脉粥样硬化	治愈	倪文飞	吴爱悯	吴爱悯	胸椎骨折切开复位内固定术;胸椎脱位切开复位内固定术;胸椎融合术，后入路;2-3个椎骨融合或再融合;腰椎骨折切开复位内固定术
14697	O210脊柱外科	2024-11-18	2024-11-25	3572328	陈圣范	1	83Y	腰椎骨折L1	重度骨质疏松;脊椎退行性病变;下肢动脉粥样硬化;老年性心脏瓣膜病	治愈	徐晖	徐晖	徐晖	腰椎骨折球囊扩张成形术;椎骨活组织检查
14698	O210脊柱外科	2024-11-17	2024-11-25	3572358	王璟	2	15Y	多发性腰椎骨折	腰椎脱位L1/L2;脊髓损伤;胫骨下端骨折;跖骨骨折;肺部感染;胸腔积液;肺肿物;盆腔积液	治愈	武垚森	武垚森	武垚森	腰椎骨折切开复位内固定术;腰椎脱位切开复位内固定术;腰椎后柱融合术，后入路;2-3个椎骨融合或再融合
14699	O210脊柱外科	2024-11-05	2024-11-25	3572373	池仁铤	1	77Y	胸椎多处骨折	脊髓损伤;多发性腰椎骨折;胸部脊髓水肿;骨质疏松;腰背部挫伤;肱骨大结节骨折;肩关节脱位;冠状动脉粥样硬化性心脏病;心脏和冠状循环诊断性影像检查的异常所见;退行性主动脉瓣疾患;二尖瓣主动脉瓣及三尖瓣关闭不全;肺动脉高压重度;心包积液;特发性肺纤维化;胸膜肥厚	治愈	倪文飞	吴爱悯	吴爱悯	胸椎骨折切开复位内固定术;椎骨截骨术;腰椎骨折球囊扩张成形术;椎骨活组织检查
14700	O210脊柱外科	2024-11-05	2024-11-25	3572385	张朝宝	1	64Y	脊神经良性肿瘤	脊椎退行性病变;腰椎楔形变;后天性脊椎滑脱;高血压;2型糖尿病;陈旧性肋骨骨折;肺肿物;老年性心脏瓣膜病;脂肪肝;后天性肾囊肿;前列腺增生	治愈	徐晖	徐晖	徐晖	硬脊膜下病损切除术;椎骨内固定术
14701	O210脊柱外科	2024-11-20	2024-11-26	3572674	陈作局	1	35Y	胸椎多处骨折	多发性腰椎骨折;肋骨多处骨折;乙型病毒性肝炎;阑尾术后;肾结石;前列腺结石	好转	黄其杉	田乃锋	田乃锋
14702	O210脊柱外科	2024-11-10	2024-11-26	3572685	林冬富	1	58Y	胸椎多处骨折	腰椎骨折L1;四根以上肋骨骨折不伴第一肋骨骨折;胸腔积液;多发性肝囊肿;胆囊息肉;主动脉弓钙化;主动脉瓣钙化;二尖瓣钙化	治愈	倪文飞	吴爱悯	吴爱悯	胸椎骨折切开复位内固定术
14703	O210脊柱外科	2024-11-04	2024-11-26	3572791	贾建光	1	44Y	多发性腰椎骨折	腰椎椎管狭窄;胸椎多处骨折;脊椎退行性病变;贫血;肝功能检查的异常结果;肾结石;肝钙化灶;前列腺增生;前列腺结石;肺肿物	治愈	徐晖	徐晖	徐晖	腰椎骨折切开复位内固定术;腰椎后柱融合术，后入路;2-3个椎骨融合或再融合;腰椎植骨术
14704	O210脊柱外科	2024-11-11	2024-11-26	3572863	伍嘉妮	2	13Y	肿瘤性病理性骨折	骨继发恶性肿瘤	好转	武垚森	武垚森	武垚森	椎骨活组织检查
14705	O210脊柱外科	2024-11-23	2024-11-26	3572910	吕碎梅	2	77Y	腰椎骨折L2	骨质疏松;胸腔积液;心功能不全;脂肪肝	治愈	黄其杉	田乃锋	田乃锋	腰椎骨折球囊扩张成形术;椎骨活组织检查
14706	O210脊柱外科	2024-11-21	2024-11-27	3573152	温在方	1	54Y	胸椎骨折	2型糖尿病;骨折术后;胆囊息肉;肺气肿;陈旧性肋骨骨折	治愈	黄其杉	田乃锋	田乃锋	胸椎骨折球囊扩张成形术
14707	O210脊柱外科	2024-11-23	2024-11-27	3573192	倪尾丁	2	80Y	胸椎骨折T11/T12	骨质疏松;心功能不全;主动脉钙化;脂肪肝;后天性肾囊肿;下肢动脉粥样硬化	治愈	黄其杉	田乃锋	田乃锋	胸椎骨折球囊扩张成形术;椎骨活组织检查
14708	O210脊柱外科	2024-11-11	2024-11-27	3573209	郑爱华	2	74Y	骨质疏松伴有病理性骨折	腰椎间盘突出;宫颈恶性肿瘤个人史;盲肠恶性肿瘤;心功能不全;肺肿物;下肢动脉粥样硬化;肾结石	好转	黄其杉	田乃锋	田乃锋	胸椎骨折球囊扩张成形术;椎骨活组织检查;腰椎椎体间融合术，后入路;2-3个椎骨融合或再融合;金属脊椎融合物置入术;腰椎间盘切除伴椎管减压术
14709	O210脊柱外科	2024-11-20	2024-11-27	3573255	叶香妹	2	73Y	骨质疏松伴有病理性骨折	腰椎术后;特发性(原发性)高血压;抑郁发作;心功能不全;后天性肾囊肿;下肢动脉粥样硬化	好转	黄其杉	田乃锋	田乃锋	胸椎骨折球囊扩张成形术
14710	O210脊柱外科	2024-11-24	2024-11-28	3573541	徐秀眉	2	71Y	腰椎骨折	骨质疏松;高血压;冠状动脉搭桥术后;帕金森病;腔隙性脑梗死;胆囊切除术后状态	治愈	黄其杉	田乃锋	田乃锋	腰椎骨折球囊扩张成形术;椎骨活组织检查
14711	O210脊柱外科	2024-11-23	2024-11-28	3573697	张定水	1	78Y	胸椎骨折	骨质疏松;骨质破坏;骨继发恶性肿瘤;后天性肾囊肿;前列腺增生;甲状腺结节;下肢动脉粥样硬化;肾结石;前列腺增生;前列腺钙化灶;肺气肿合并肺大泡;特发性肺纤维化;肺部阴影	未愈	倪文飞	吴爱悯	吴爱悯
14712	O210脊柱外科	2024-11-19	2024-11-30	3574219	周文富	1	39Y	取除骨折内固定装置	腰椎退行性病变;银屑病;特发性肺纤维化;脂肪肝	其他	徐晖	徐晖	徐晖	脊柱内固定装置去除术
14713	O210脊柱外科	2024-11-25	2024-11-30	3574220	黄建德	1	82Y	腰椎骨折L1	骨质疏松;高血压;前列腺恶性肿瘤;下肢动脉粥样硬化;后天性肾囊肿;肺肿物;糖尿病;肝胆管扩张;心脏和冠状循环诊断性影像检查的异常所见;肺部感染;肺大疱;肋骨多处骨折;主动脉钙化;主动脉瓣钙化;冠状动脉粥样硬化;二尖瓣钙化	治愈	倪文飞	吴爱悯	吴爱悯	腰椎骨折球囊扩张成形术;椎骨活组织检查
14714	O210脊柱外科	2024-11-23	2024-11-30	3574233	贾益华	2	54Y	取除骨折内固定装置	脂肪肝;肺部阴影;特发性肺纤维化;肝回声不均	其他	倪文飞	吴爱悯	吴爱悯	脊柱内固定装置去除术
14715	O210脊柱外科	2024-11-23	2024-11-30	3574234	徐国升	1	62Y	取除骨折内固定装置	下肢动脉粥样硬化;前列腺结石;心脏和冠状循环诊断性影像检查的异常所见	其他	倪文飞	吴爱悯	吴爱悯	脊柱内固定装置去除术
14716	O210脊柱外科	2024-11-15	2024-11-30	3574302	张文凯	1	24Y	颈椎多处骨折		好转	王向阳	盛孙仁	盛孙仁	颈椎骨折切开复位内固定术;颅骨牵引术
14717	O210脊柱外科	2024-11-24	2024-12-01	3574623	马奶儿	2	79Y	胸椎骨折	骨质疏松;肾功能不全;脂肪肝;后天性肾囊肿;下肢动脉粥样硬化;老年性心脏病	好转	倪文飞	许聪	许聪	胸椎骨折球囊扩张成形术;椎骨活组织检查
14718	O210脊柱外科	2024-11-24	2024-12-01	3574678	毛冬银	2	70Y	胸椎骨折	骨质疏松;高血压;下肢动脉粥样硬化;下肢静脉曲张;肝囊肿;肺肿物;主动脉钙化;肝回声不均;特发性肺纤维化	好转	倪文飞	吴爱悯	吴爱悯	胸椎骨折球囊扩张成形术;椎骨活组织检查
14719	O210脊柱外科	2024-11-28	2024-12-02	3575076	金秀才	1	69Y	腰椎骨折	骨质疏松;脊椎退行性病变;胸腔积液;前列腺结石	治愈	徐晖	徐晖	徐晖	腰椎骨折球囊扩张成形术;椎骨活组织检查
14720	O210脊柱外科	2024-11-19	2024-12-02	3575080	文怀富	1	34Y	腰椎骨折L3	肝囊肿	治愈	倪文飞	吴爱悯	吴爱悯	腰椎骨折切开复位内固定术
14721	O210脊柱外科	2024-11-15	2024-12-04	3575806	杨慧欣	2	17Y	胸椎多处骨折	腰椎骨折;胸部挫伤;腰背部挫伤;皮肤挫伤;椎管内蛛网膜囊肿	好转	毛方敏	毛方敏	潘翔翔
14722	O210脊柱外科	2024-11-27	2024-12-04	3575922	章建军	2	56Y	腰椎骨折	多处开放性伤口;多处挫伤;陈旧性胸椎骨折;骨质疏松;脊椎退行性病变;纵隔肿物;肾结石	好转	林仲可	林仲可	林仲可	腰椎骨折球囊扩张成形术;椎骨活组织检查
14723	O210脊柱外科	2024-11-23	2024-12-05	3576279	俞明	1	55Y	腰椎骨折L2	腰椎退行性病变;四根以上肋骨骨折不伴第一肋骨骨折;肺部感染;胸腔积液;肺气肿;肝囊肿;脂肪肝;前列腺结石	好转	倪文飞	吴爱悯	吴爱悯	腰椎骨折切开复位内固定术
14724	O210脊柱外科	2024-11-28	2024-12-05	3576327	费友之	1	46Y	取除骨折内固定装置	肺大疱;后天性肾囊肿	其他	倪文飞	许聪	许聪	脊柱内固定装置去除术
14725	O210脊柱外科	2024-12-03	2024-12-06	3576545	张迎春	2	31Y	腰椎骨折	腰部脊髓水肿;脊柱骨软骨病	好转	林仲可	林仲可	林仲可
14726	O210脊柱外科	2024-11-29	2024-12-07	3576853	张思海	1	52Y	胸椎骨折	肺挫伤;多处挫伤;头皮血肿;骨质疏松;肺肿物;前列腺结石	好转	徐晖	徐晖	徐晖	胸椎骨折球囊扩张成形术;椎骨活组织检查
14727	O210脊柱外科	2024-11-24	2024-12-07	3576883	林千顺	1	87Y	枢椎骨折	弥漫性特发性骨肥厚[DISH病];高血压;肺肿物;脂肪肝;老年性心脏病;下肢动脉粥样硬化	好转	倪文飞	许聪	许聪	颈椎骨折切开复位内固定术;颈椎植骨术;后入路颈椎融合术;2-3个椎骨融合或再融合
14728	O210脊柱外科	2024-11-30	2024-12-07	3576941	陈玉钗	2	60Y	骨质疏松伴有病理性骨折	脊椎退行性病变;肺肿物;脂肪肝;腕关节积液	好转	徐晖	徐晖	徐晖	经皮穿刺脊柱后凸成形术
14729	O210脊柱外科	2024-12-04	2024-12-07	3576987	潘春兰	2	81Y	腰椎骨折L2	骨质疏松;腰椎退行性病变;肺部阴影	治愈	黄其杉	黄其杉	吴爱悯	腰椎骨折球囊扩张成形术;椎骨活组织检查
14730	O210脊柱外科	2024-12-02	2024-12-08	3577346	王志权	1	89Y	腰椎骨折L1	陈旧性胸椎骨折;骨质疏松;高血压;肺部感染;肺肿物;肝胆管扩张;下肢动脉粥样硬化;前列腺增生;后天性肾囊肿	好转	倪文飞	许聪	许聪	腰椎骨折球囊扩张成形术
14731	O210脊柱外科	2024-11-25	2024-12-09	3577741	黄庆华	1	52Y	腰椎峡部裂	脊椎前移;腰椎椎管狭窄;腰椎间盘突出;腰椎退行性病变;肺肿物;陈旧性肋骨骨折;肾结石;下肢动脉粥样硬化;肝功能检查的异常结果;脊柱骨软骨病	好转	倪文飞	许聪	许聪	内镜下腰椎髓核切除术;经皮椎间盘电热纤维环成形术(IDET);腰骶椎椎体间融合术，后入路;2-3个椎骨融合或再融合
14732	O210脊柱外科	2024-12-08	2024-12-09	3577828	朱小映	2	51Y	腰椎骨折	下肢深静脉血栓形成;下肢静脉肌间血栓形成;脂肪肝;胆囊息肉	未愈	黄其杉	吴爱悯	吴爱悯
14733	O210脊柱外科	2024-12-03	2024-12-09	3577835	薛茂邓	1	66Y	腰椎骨折	骨质疏松;腰椎退行性病变;脊椎前移;施莫尔结;脊柱骨软骨病;腰骶椎间盘突出;胸椎退行性病变;脊柱血管瘤;高血压;后天性肾囊肿;前列腺增生;前列腺结石;下肢动脉粥样硬化	好转	倪文飞	许聪	许聪	腰椎骨折球囊扩张成形术;椎骨活组织检查
14734	O210脊柱外科	2024-12-02	2024-12-09	3577845	叶积松	1	86Y	肿瘤性病理性骨折	躯干骨继发恶性肿瘤;前列腺恶性肿瘤;骨质疏松;腰椎间盘突出;腰椎椎管狭窄;高血压;肝囊肿;后天性肾囊肿;下肢动脉粥样硬化	好转	黄其杉	吴爱悯	吴爱悯	胸椎骨折球囊扩张成形术;腰椎骨折球囊扩张成形术;椎骨活组织检查
14735	O210脊柱外科	2024-12-06	2024-12-09	3577850	黄松华	1	53Y	腰椎骨折	骨质疏松;脂肪肝;后天性肾囊肿;前列腺增生;前列腺结石	好转	武垚森	武垚森	武垚森
14736	O210脊柱外科	2024-12-02	2024-12-10	3578195	谢花弟	2	82Y	腰椎骨折	骨质疏松;脂肪肝;肾结石;下肢动脉粥样硬化;肺肿物	治愈	徐晖	徐晖	徐晖	腰椎骨折球囊扩张成形术;椎骨活组织检查
14737	O210脊柱外科	2024-12-05	2024-12-10	3578211	陈美云	2	65Y	胸椎骨折	腰椎骨折;桡骨远端骨折;骨质疏松;脊椎退行性病变;骶椎腰化;高血压;肺挫伤;脂肪肝	治愈	武垚森	武垚森	武垚森	胸椎骨折球囊扩张成形术;腰椎骨折球囊扩张成形术;椎骨活组织检查
14738	O210脊柱外科	2024-12-02	2024-12-10	3578214	林周梅	2	89Y	骨质疏松伴有病理性骨折	胸椎楔形变;胸椎退行性病变;高血压;2型糖尿病;胆囊息肉;下肢动脉粥样硬化闭塞症	好转	徐晖	徐晖	徐晖	胸椎骨折球囊扩张成形术;椎骨活组织检查
14739	O210脊柱外科	2024-11-18	2024-12-10	3578217	王巧妹	2	67Y	腰椎间盘突出	腰痛;骨质疏松伴有病理性骨折;颈椎病;高血压;后天性肾囊肿;肝囊肿;肺肿物	好转	黄其杉	吴爱悯	吴爱悯	脊神经根阻滞术;腰椎间盘造影;腰椎椎体间融合术，后入路;2-3个椎骨融合或再融合;金属脊椎融合物置入术;腰椎间盘切除伴椎板切除术;腰椎骨折球囊扩张成形术
14740	O210脊柱外科	2024-11-30	2024-12-10	3578218	林永钗	2	67Y	脊椎前移	腰椎椎管狭窄;腰椎间盘突出;腰椎退行性病变;两根肋骨骨折不伴第一肋骨骨折;后天性肾囊肿;陈旧性肺结核;下肢动脉粥样硬化;陈旧性肋骨骨折	治愈	倪文飞	许聪	许聪	腰椎椎体间融合术，后入路;2-3个椎骨融合或再融合;金属脊椎融合物置入术;腰椎间盘切除伴椎板切除术
14741	O210脊柱外科	2024-11-28	2024-12-10	3578226	李昌梅	2	47Y	多发性腰椎骨折	骶尾部挫伤;腰背部挫伤;脊椎退行性病变;胸腔积液;肺肿物	治愈	徐晖	徐晖	徐晖	腰椎骨折切开复位内固定术;腰椎植骨术;腰椎后柱融合术，后入路;2-3个椎骨融合或再融合
14742	O210脊柱外科	2024-12-07	2024-12-12	3579134	赵多兰	2	62Y	骨质疏松伴有病理性骨折	腰椎退行性病变;腰骶椎间盘突出;后天性肾囊肿;肺肿物;下肢动脉粥样硬化;胸腔积液;腰椎术后	好转	倪文飞	许聪	许聪	胸椎骨折球囊扩张成形术
14743	O210脊柱外科	2024-12-07	2024-12-12	3579144	杨曾花	2	70Y	腰椎骨折L1	骨质疏松;高血压;2型糖尿病;腰椎退行性病变;胸椎退行性病变;下肢动脉粥样硬化	治愈	黄其杉	黄其杉	吴爱悯	经皮椎骨成形术
14744	O210脊柱外科	2024-12-07	2024-12-12	3579149	林秋花	2	65Y	腰椎骨折	胸椎骨折T11/T12;骨质疏松;陈旧性胸椎骨折;陈旧性腰椎骨折;下肢动脉粥样硬化;胆囊结石;肺肿物	治愈	黄其杉	吴爱悯	吴爱悯	腰椎骨折球囊扩张成形术;胸椎骨折球囊扩张成形术;椎骨活组织检查
14745	O210脊柱外科	2024-12-07	2024-12-12	3579153	陈学珍	1	67Y	腰椎骨折	骨质疏松;高血压;腰椎退行性病变	治愈	黄其杉	吴爱悯	吴爱悯	经皮椎骨成形术;椎骨活组织检查
14746	O210脊柱外科	2024-12-09	2024-12-12	3579156	林锦平	2	61Y	胸椎多处骨折	骨质疏松;多发性肝囊肿;老年性心脏病	好转	倪文飞	许聪	许聪	胸椎骨折球囊扩张成形术
14747	O210脊柱外科	2024-12-08	2024-12-12	3579183	戴新民	1	66Y	胸椎骨折	骨质疏松;腰骶椎间盘突出;脊椎前移;腰椎退行性病变;下肢动脉粥样硬化;脂肪肝;前列腺增生;老年性心脏病;高血压;糖尿病;前列腺结石	好转	倪文飞	许聪	许聪	胸椎骨折球囊扩张成形术
14748	O210脊柱外科	2024-12-07	2024-12-14	3579759	乐文监	1	34Y	多发性腰椎骨折	胸椎骨折;胸部挫伤;腰椎退行性病变;肺挫伤;肾结石;肝囊肿;胆囊息肉;脾大	好转	徐晖	徐晖	徐晖
14749	O210脊柱外科	2024-12-05	2024-12-14	3579762	陈文杰	1	16Y	腰椎骨折L1		治愈	黄其杉	黄其杉	吴爱悯	腰椎骨折切开复位内固定术
14750	O210脊柱外科	2024-12-02	2024-12-14	3579764	孙学平	1	55Y	腰椎骨折	肋骨骨折;肾结石;后天性肾囊肿	好转	林仲可	林仲可	林仲可
14751	O210脊柱外科	2024-12-02	2024-12-14	3579863	吴玉梅	2	69Y	胸椎骨折	骨质疏松;脊椎退行性病变;高血压;脂肪肝;后天性肾囊肿;肾结石;胸腔积液	好转	倪文飞	许聪	许聪	胸椎骨折球囊扩张成形术
14752	O210脊柱外科	2024-12-08	2024-12-15	3580143	苏茂钗	2	71Y	胸椎骨折	骨质疏松;脊椎退行性病变;下肢动脉粥样硬化	好转	倪文飞	许聪	许聪	胸椎骨折球囊扩张成形术
14753	O210脊柱外科	2024-11-30	2024-12-15	3580283	陈世昌	1	58Y	颈椎骨折	寰枢关节扭伤;颈椎退行性病变;肺肿物;前列腺结石;下肢动脉粥样硬化;肋骨骨折;头皮血肿;创伤性湿肺	好转	倪文飞	许聪	许聪
14754	O210脊柱外科	2024-12-12	2024-12-15	3580295	张守兰	2	52Y	胸椎骨折	腰椎骨折;胸腰椎椎管狭窄;肋骨骨折;气胸;肺挫伤;胸腔积液;四肢先天性畸形;脂肪肝	好转	林仲可	林仲可	林仲可
14755	O210脊柱外科	2024-11-27	2024-12-16	3580685	周立兰	2	52Y	多发性腰椎骨折	腰骶神经损伤;胸椎多处骨折;肋骨多处骨折;胸腔积液;肺挫伤;肺不张;气胸;肾上腺肿物;肩关节关节病	治愈	林仲可	林仲可	林仲可	腰椎骨折切开复位内固定术;腰椎后柱融合术，后入路;2-3个椎骨融合或再融合;金属脊椎融合物置入术;腰椎间盘切除伴椎板切除术
14756	O210脊柱外科	2024-12-13	2024-12-16	3580714	黄翊涵	2	6Y	颈部损伤	寰椎骨折	好转	林仲可	林仲可	林仲可
14757	O210脊柱外科	2024-12-14	2024-12-21	3582489	王炳盛	1	73Y	胸椎骨折	骨质疏松;脊椎前移;高血压;2型糖尿病;脑梗死;老年性脑萎缩;肾结石;后天性肾囊肿;胆囊结石;前列腺结石;前列腺增生	治愈	黄其杉	吴爱悯	吴爱悯	胸椎骨折球囊扩张成形术
14758	O210脊柱外科	2024-12-14	2024-12-21	3582501	陈怡宏	2	44Y	取除骨折内固定装置	肾结石;甲状腺结节;乳房纤维囊性乳腺病	其他	黄其杉	吴爱悯	吴爱悯	脊柱内固定装置去除术
14759	O210脊柱外科	2024-12-12	2024-12-21	3582504	孙香兰	2	54Y	胸椎骨折	腰椎骨折;骨质疏松;高血压;高脂血症;肺肿物;肝囊肿;胆囊结石;子宫平滑肌瘤	治愈	林仲可	林仲可	林仲可	胸椎骨折球囊扩张成形术;腰椎骨折球囊扩张成形术;椎骨活组织检查
14760	O210脊柱外科	2024-12-14	2024-12-21	3582509	池宝玉	2	88Y	骨质疏松伴有病理性骨折	腰椎术后;胸椎楔形变;骨质增生;骨折术后;高血压;静脉曲张术后;腹股沟术后;肝囊肿;下肢动脉粥样硬化	好转	黄其杉	吴爱悯	吴爱悯	腰椎骨折球囊扩张成形术;椎骨活组织检查
14761	O210脊柱外科	2024-12-13	2024-12-21	3582512	陈希石	1	48Y	腰椎骨折L1	胆囊结石;前列腺结石	治愈	黄其杉	黄其杉	吴爱悯	腰椎骨折切开复位内固定术
14762	O210脊柱外科	2024-12-17	2024-12-21	3582516	胡银娇	2	83Y	胸椎骨折	骨质疏松;高血压;陈旧性肋骨骨折;肺部阴影;肺部感染;腰椎退行性病变	治愈	黄其杉	黄其杉	吴爱悯	胸椎骨折球囊扩张成形术
14763	O210脊柱外科	2024-12-16	2024-12-21	3582532	潘兰妹	2	77Y	骨质疏松伴有病理性骨折	陈旧性胸椎骨折;高血压;腰椎退行性病变	治愈	黄其杉	吴爱悯	吴爱悯	胸椎骨折球囊扩张成形术
14764	O210脊柱外科	2024-12-14	2024-12-22	3582874	余娇迪	2	85Y	胸椎多处骨折	骨质疏松;肺部感染;支气管哮喘;冠状动脉粥样硬化性心脏病;心力衰竭;心房扑动;心房颤动;老年性心脏病;陈旧性肺结核;肺肿物;胸腔积液;高血压	治愈	徐晖	徐晖	徐晖	胸椎骨折球囊扩张成形术;椎骨活组织检查
14765	O210脊柱外科	2024-12-15	2024-12-22	3582884	葛爱月	2	63Y	胸椎骨折	腰椎退行性病变;腰骶椎间盘突出;肾结石;肝囊肿;后天性肾囊肿;肺肿物	好转	倪文飞	许聪	许聪	胸椎骨折切开复位内固定术;椎骨内固定术;经皮椎骨成形术
14766	O210脊柱外科	2024-12-16	2024-12-23	3583339	陈秀妹	2	73Y	胸椎骨折	骨质疏松;脊椎退行性病变;2型糖尿病;高血压;老年性心脏瓣膜病;肾结石;下肢动脉粥样硬化;肺肿物;腹主动脉钙化;主动脉钙化;肠系膜脂肪炎;肾动脉硬化	治愈	徐晖	徐晖	徐晖	胸椎骨折球囊扩张成形术;椎骨活组织检查
14767	O210脊柱外科	2024-12-18	2024-12-24	3583734	魏秀娟	2	72Y	骨质疏松伴有病理性骨折	陈旧性腰椎骨折;骨质疏松;脊椎退行性病变;高血压;脂肪肝;肝功能检查的异常结果;下肢动脉粥样硬化;低钾血症;肺部感染	好转	倪文飞	许聪	许聪	胸椎骨折球囊扩张成形术
14768	O210脊柱外科	2024-12-19	2024-12-24	3583747	郭小兰	2	67Y	胸椎骨折	骨质疏松	治愈	黄其杉	吴爱悯	吴爱悯	胸椎骨折球囊扩张成形术
14769	O210脊柱外科	2024-12-19	2024-12-24	3583749	胡兰香	2	89Y	胸椎骨折T11/T12	腰椎骨折L1;骨质疏松;腰椎退行性病变;支气管扩张(症);胸腔积液;肺炎	治愈	黄其杉	吴爱悯	吴爱悯	胸椎骨折球囊扩张成形术;椎骨活组织检查
14770	O210脊柱外科	2024-12-14	2024-12-25	3584216	吴锦焕	1	91Y	腰椎骨折	胸椎骨折;骨质疏松;脊椎退行性病变;后天性肾囊肿;前列腺增生;前列腺结石;下肢动脉硬化闭塞症;老年性心脏病	治愈	倪文飞	许聪	许聪	胸椎骨折球囊扩张成形术;腰椎骨折球囊扩张成形术
14771	O210脊柱外科	2024-12-21	2024-12-25	3584231	陈莲芬	2	60Y	腰椎骨折L1	骨质疏松;尺骨桡骨闭合性骨折;腹股沟术后;肾结石	治愈	黄其杉	吴爱悯	吴爱悯	腰椎骨折球囊扩张成形术;椎骨活组织检查
14772	O210脊柱外科	2024-12-18	2024-12-26	3584638	马大全	1	74Y	腰椎骨折	骨质疏松;高血压;帕金森病;脂肪肝;胆囊息肉;后天性肾囊肿;前列腺结石;下肢动脉粥样硬化;老年性心脏病	治愈	倪文飞	许聪	许聪	腰椎骨折球囊扩张成形术;椎骨活组织检查
14773	O210脊柱外科	2024-12-09	2024-12-26	3584688	吴细线	2	51Y	颈部脊髓损伤	颈椎椎管狭窄;尺骨骨折;2型糖尿病;脂肪肝;肺肿物;下肢静脉血栓形成	好转	倪文飞	许聪	许聪	颈椎后路单开门椎管减压术;椎骨内固定术
14774	O210脊柱外科	2024-12-21	2024-12-26	3584715	郑爱弟	2	97Y	骨质疏松伴有病理性骨折	腰椎退行性病变;脊柱血管瘤;腰椎术后;特发性(原发性)高血压;2型糖尿病;下肢动脉粥样硬化;脂肪肝;胆囊胆固醇沉着症	治愈	徐晖	徐晖	徐晖	胸椎骨折球囊扩张成形术;椎骨活组织检查
14775	O210脊柱外科	2024-12-16	2024-12-26	3584718	诸周来	2	58Y	腰椎骨折L2	腰椎椎管狭窄;脊椎退行性病变;陈旧性肋骨骨折;癫痫;脂肪肝;胆囊结石;肺部感染	治愈	徐晖	徐晖	徐晖	腰椎骨折球囊扩张成形术;椎骨活组织检查
14776	O210脊柱外科	2024-12-22	2024-12-26	3584781	宋玉珠	2	82Y	腰椎骨折L1	骨质疏松	治愈	黄其杉	吴爱悯	吴爱悯	腰椎骨折球囊扩张成形术;椎骨活组织检查
14777	O210脊柱外科	2024-12-17	2024-12-28	3585274	李进平	1	29Y	腰椎骨折	胸椎骨折;腰椎扭伤和劳损;创伤性湿肺;胸腔积液	好转	倪文飞	许聪	许聪	腰椎骨折切开复位内固定术;腰椎后柱融合术，后入路;2-3个椎骨融合或再融合
14778	O210脊柱外科	2024-12-21	2024-12-28	3585294	季迪红	2	70Y	腰椎骨折	陈旧性胸椎骨折;骨质疏松;脊椎退行性病变;下肢动脉粥样硬化	好转	倪文飞	许聪	许聪	腰椎骨折球囊扩张成形术
14779	O210脊柱外科	2024-12-22	2024-12-28	3585310	周秀珠	2	76Y	骨质疏松伴有病理性骨折	陈旧性胸椎骨折;高血压;骨折术后;支气管扩张伴感染	治愈	黄其杉	黄其杉	吴爱悯	胸椎骨折球囊扩张成形术
14780	O210脊柱外科	2024-12-24	2024-12-28	3585321	林丽华	2	84Y	腰椎骨折	骨质疏松;腰椎退行性病变;高血压	治愈	黄其杉	黄其杉	吴爱悯	腰椎骨折球囊扩张成形术;椎骨活组织检查
14781	O210脊柱外科	2024-12-23	2024-12-28	3585352	唐艮林	2	69Y	胸椎骨折	骨质疏松;高血压;脊椎退行性病变;肺肿物;下肢动脉粥样硬化	治愈	徐晖	徐晖	徐晖	胸椎骨折球囊扩张成形术
14782	O210脊柱外科	2024-12-17	2024-12-29	3585760	林欢欢	2	33Y	取除骨折内固定装置	乳房纤维囊性乳腺病	其他	徐晖	徐晖	徐晖	脊柱内固定装置去除术
14783	O210脊柱外科	2024-12-23	2024-12-30	3586161	陈春眉	2	80Y	胸椎骨折	多发性腰椎骨折;陈旧性腰椎骨折;脊椎退行性病变;骨质疏松;特发性(原发性)高血压;肺部感染;肺肿物	治愈	徐晖	徐晖	徐晖	胸椎骨折球囊扩张成形术;腰椎骨折球囊扩张成形术;椎骨活组织检查
14784	O210脊柱外科	2024-12-23	2024-12-31	3586586	金竹香	2	77Y	骨质疏松伴有病理性骨折	特发性(原发性)高血压;帕金森病;脂肪肝;肝囊肿;胆总管扩张;胰管扩张;后天性肾囊肿;下肢动脉粥样硬化;老年性心脏病	好转	倪文飞	许聪	许聪	腰椎骨折球囊扩张成形术
14785	O210脊柱外科	2024-12-24	2024-12-31	3586589	朱玉钗	2	71Y	骨质疏松伴有病理性骨折	骨折术后;腰椎退行性病变;特发性(原发性)高血压;脂肪肝	好转	倪文飞	许聪	许聪	胸椎骨折球囊扩张成形术;腰椎骨折球囊扩张成形术
14786	O210脊柱外科	2024-12-15	2024-12-31	3586594	叶兄妹	2	78Y	骨质疏松伴有病理性骨折	胸膜炎;肺部感染;脂肪肝	治愈	黄其杉	吴爱悯	吴爱悯	椎骨活组织检查;胸椎骨折球囊扩张成形术
14787	O210脊柱外科	2024-12-24	2024-12-31	3586601	戴赛芬	2	56Y	多发性腰椎骨折	骨质疏松;脂肪肝;肾结石	好转	倪文飞	许聪	许聪	腰椎骨折球囊扩张成形术
14788	O210脊柱外科	2024-12-25	2024-12-31	3586605	王水平	1	24Y	取除骨折内固定装置		其他	倪文飞	许聪	许聪	脊柱内固定装置去除术
14789	O210脊柱外科	2024-12-23	2024-12-31	3586608	徐杏娣	2	66Y	胸椎多处骨折	腰椎骨折;骨折术后;骨质疏松;强直性脊柱炎;脂肪肝;下肢动脉粥样硬化;老年性心脏病	好转	倪文飞	许聪	许聪	胸椎骨折球囊扩张成形术;腰椎骨折球囊扩张成形术
14790	O210脊柱外科	2024-12-23	2024-12-31	3586616	张祖勇	1	46Y	颈部脊髓水肿	枢椎骨折;胸椎多处骨折;脑挫伤;面部软组织挫伤;颈椎退行性病变;腰椎退行性病变;腰椎峡部裂;腰椎前移	好转	黄其杉	吴爱悯	吴爱悯
14791	O210脊柱外科	2024-12-17	2024-12-31	3586628	李春雨	2	78Y	腰椎骨折	脊柱继发恶性肿瘤;胸腰椎管椎间盘狭窄;肺恶性肿瘤;肺部感染;高血压;帕金森病;老年性心脏病;下肢动脉粥样硬化	好转	倪文飞	许聪	许聪	腰椎骨折切开复位内固定术;椎骨内固定术;骨空隙骨水泥填充术
14792	O210脊柱外科	2024-12-25	2024-12-31	3586764	董兴妹	2	81Y	腰椎骨折	陈旧性腰椎骨折;骨质疏松;心房颤动;低钾血症;胃术后	治愈	黄其杉	黄其杉	吴爱悯	腰椎骨折球囊扩张成形术;椎骨活组织检查
14793	O211脊柱外科	2025-05-01	2025-05-04	3498677	滕雪兰	2	62Y	腰椎压缩性骨折	骨质疏松伴有病理性骨折;尺骨桡骨闭合性骨折;腰椎术后;肺肿物;脂肪肝;后天性肾囊肿	治愈	林仲可	王胜	王胜	腰椎骨折球囊扩张成形术
14794	O211脊柱外科	2025-05-02	2025-05-04	3498678	洪香妹	2	75Y	腰椎骨折L1	骨质疏松;腰椎侧弯;腰椎椎管狭窄;高血压;脑血管病;后天性肾囊肿	治愈	林仲可	王胜	王胜	腰椎骨折球囊扩张成形术
14795	O211脊柱外科	2025-04-25	2025-05-05	3498861	张春柳	2	63Y	胸椎多处骨折	骨质疏松;高血压;糖尿病不伴有并发症;脂肪肝;肾结石;下肢动脉粥样硬化;肺诊断性影像异常	治愈	王向阳	盛孙仁	朱思品	胸椎骨折球囊扩张成形术
14796	O211脊柱外科	2025-05-04	2025-05-08	3499653	吴云姣	2	64Y	腰椎骨折L1	胸椎骨折;腰椎前移;骨质疏松;腰椎退行性病变;胸椎退行性病变;肝回声不均;子宫术后;子宫颈恶性肿瘤	治愈	黄其杉	田乃锋	周凯亮	腰椎骨折球囊扩张成形术
14797	O211脊柱外科	2025-05-04	2025-05-08	3499654	颜瑞霞	2	66Y	腰椎骨折	腰椎退行性病变;蛛网膜囊肿;肺肿物;肺部感染;肝回声不均;后天性肾囊肿;肾结石	治愈	黄其杉	田乃锋	周凯亮	腰椎骨折球囊扩张成形术
14798	O211脊柱外科	2025-05-02	2025-05-08	3499755	周志蕊	2	80Y	腰椎骨折L1	陈旧性胸椎骨折;骨质疏松;腰椎间盘突出;腰椎椎管狭窄	治愈	王向阳	盛孙仁	朱思品	腰椎骨折球囊扩张成形术
14799	O211脊柱外科	2025-05-05	2025-05-09	3499916	张淑琴	2	68Y	骨质疏松伴有病理性骨折，其他的	腰椎压缩性骨折;骨质疏松	好转	林焱	许聪	许聪	腰椎骨折球囊扩张成形术
14800	O211脊柱外科	2025-05-06	2025-05-09	3499927	陈冰如	2	70Y	腰椎骨折L1	骨质疏松;腰椎间盘突出;具有心脏起搏器;胆囊息肉	治愈	林仲可	王胜	王胜	腰椎骨折球囊扩张成形术
14801	O211脊柱外科	2025-05-06	2025-05-09	3499929	吴宝法	1	69Y	骨质疏松伴有病理性骨折	腰椎间盘突出;脊柱侧弯;腰椎骨折L2;高血压;肺肿物;肾结石;后天性肾囊肿;前列腺增生;前列腺结石;颈椎术后	好转	林仲可	王胜	王胜	腰椎骨折球囊扩张成形术
14802	O211脊柱外科	2025-04-25	2025-05-09	3499988	杨德时	1	70Y	腰椎间盘突出	腰椎前移;腰椎椎管狭窄;腰椎骨折L2;后天性肾囊肿;腰椎峡部裂	治愈	王向阳	盛孙仁	朱思品	腰椎椎体间融合术，后入路;腰椎植骨术;2-3个椎骨融合或再融合;椎体脊椎融合装置的置入;腰椎间盘切除伴椎管减压术;黄韧带部分切除术
14803	O211脊柱外科	2025-05-06	2025-05-11	3500327	黄丽华	2	60Y	取除骨折内固定装置	肺肿物;胆囊息肉	其他	林仲可	王胜	王胜	脊柱内固定装置去除术
14804	O211脊柱外科	2025-05-06	2025-05-11	3500329	陶春女	2	76Y	骨质疏松，其他的	腰椎骨折L2;高血压;人工膝关节	治愈	林焱	许聪	许聪	腰椎骨折球囊扩张成形术
14805	O211脊柱外科	2025-05-02	2025-05-11	3500333	张顺勇	1	41Y	取除骨折内固定装置	高血压;冠状动脉支架植入后状态	其他	林焱	许聪	许聪	脊柱内固定装置去除术
14806	O211脊柱外科	2025-05-02	2025-05-12	3500608	曾少明	1	35Y	取除骨折内固定装置		其他	林焱	许聪	许聪	脊柱内固定装置去除术
14807	O211脊柱外科	2025-04-28	2025-05-12	3500609	厉玉兰	2	62Y	腰椎前移	腰椎椎管狭窄;腰椎压缩性骨折;脂肪肝	治愈	林焱	许聪	许聪	经椎间孔入路腰椎体融合术;2-3个椎骨融合或再融合;金属脊椎融合物置入术;黄韧带部分切除术;腰椎间盘切除伴椎管减压术
14808	O211脊柱外科	2025-05-07	2025-05-12	3500691	金碎华	1	77Y	颈部脊髓损伤	颈椎骨折;颈椎间盘突出;头部的损伤;胆囊结石;后天性肾囊肿	好转	王向阳	盛孙仁	朱思品
14809	O211脊柱外科	2025-05-02	2025-05-12	3500730	陈立成	1	70Y	多发性腰椎骨折	主动脉钙化;肝回声不均;多发性肝囊肿;后天性肾囊肿;前列腺增生;下肢动脉粥样硬化;高血压;前列腺结石	治愈	毛方敏	毛方敏	万峻莱	腰椎骨折切开复位内固定术
14810	O211脊柱外科	2025-05-09	2025-05-13	3501004	潘卫章	2	67Y	骨质疏松	陈旧性胸椎骨折;陈旧性腰椎骨折;胸椎退行性病变;肝囊肿;肺肿物;后天性肾囊肿;肾结石	好转	林仲可	王胜	王胜
14811	O211脊柱外科	2025-05-09	2025-05-14	3501229	黄阿兰	2	85Y	骨质疏松伴有病理性骨折，其他的	腰椎骨折;脊椎退行性病变;腰椎术后;骨折术后;单纯性慢性支气管炎;胆囊结石;后天性肾囊肿;老年性心脏瓣膜病	好转	林仲可	王胜	王胜	腰椎骨折球囊扩张成形术
14812	O211脊柱外科	2025-05-11	2025-05-15	3501648	项有花	2	76Y	骨质疏松伴有病理性骨折，其他的	腰椎压缩性骨折;胸椎压缩性骨折;陈旧性腰椎骨折;脊椎退行性病变;脊柱侧弯;2型糖尿病;肺\[部分\]后天性缺失;肺肿物;肺恶性肿瘤	好转	林仲可	王胜	王胜	胸椎骨折球囊扩张成形术;腰椎骨折球囊扩张成形术
14813	O211脊柱外科	2025-05-15	2025-05-15	3501825	刘爱珍	2	70Y	骨质疏松伴有病理性骨折，其他的	胸椎骨折;白内障;静脉疾患;腰椎间盘突出	好转	林焱	许聪	许聪	胸椎骨折球囊扩张成形术
14814	O211脊柱外科	2025-05-12	2025-05-16	3502025	林廷和	1	87Y	骨质疏松伴有病理性骨折，其他的	腰椎压缩性骨折;肺恶性肿瘤;高血压;陈旧性肺结核;腰椎术后	好转	林焱	许聪	许聪	腰椎骨折球囊扩张成形术
14815	O211脊柱外科	2025-05-08	2025-05-16	3502025	陈冬蕊	2	81Y	胸椎骨折	骨质疏松;腰椎术后	治愈	王向阳	盛孙仁	朱思品	胸椎骨折球囊扩张成形术
14816	O211脊柱外科	2025-05-08	2025-05-16	3502024	章小荣	1	47Y	颈部脊髓损伤	颈椎脱位;寰椎骨折;颈椎骨折C4;头皮血肿;后天性肾囊肿	好转	王向阳	盛孙仁	朱思品	前入路颈椎融合术;前入路颈椎间盘切除术;金属脊椎融合物置入术;2-3个椎骨融合或再融合;颈椎骨折切开复位内固定术
14817	O211脊柱外科	2025-05-14	2025-05-17	3502232	赖科珍	1	54Y	腰椎骨折	慢性胃炎;脂肪肝	好转	林焱	许聪	许聪
14818	O211脊柱外科	2025-05-12	2025-05-18	3502447	顾加钱	1	53Y	取除骨折内固定装置	鼻咽肿物;甲状腺结节;心功能不全;脂肪肝;胆囊息肉	其他	林仲可	王胜	王胜	脊柱内固定装置去除术
14819	O211脊柱外科	2025-05-12	2025-05-18	3502578	廖开荣	1	48Y	取除骨折内固定装置	脂肪肝;前列腺结石	其他	林焱	许聪	许聪	脊柱内固定装置去除术
14820	O211脊柱外科	2025-05-11	2025-05-19	3502843	董子龙	1	45Y	取除骨折内固定装置	下肢动脉粥样硬化;前列腺增生;高血压	其他	毛方敏	毛方敏	万峻莱	脊柱内固定装置去除术
14821	O211脊柱外科	2025-05-02	2025-05-19	3502846	郑阿豪	1	34Y	腰部脊髓损伤	腰椎骨折L1;胸椎棘突骨折;骶骨骨折;跟骨骨折	好转	林仲可	林仲可	王胜	腰椎椎体间融合术，后入路;跟骨骨折切开复位钢针内固定术;椎管减压术;腰椎植骨术;2-3个椎骨融合或再融合;椎体脊椎融合装置的置入;关节软骨修复术;创面封闭式负压引流术（VSD)
14822	O211脊柱外科	2025-05-09	2025-05-21	3503467	徐上道	1	57Y	取除骨折内固定装置	脂肪肝	其他	毛方敏	毛方敏	万峻莱	脊柱内固定装置去除术
14823	O211脊柱外科	2025-05-10	2025-05-21	3503468	刘志红	1	38Y	取除骨折内固定装置	特发性肺纤维化	其他	毛方敏	毛方敏	万峻莱	脊柱内固定装置去除术
14824	O211脊柱外科	2025-05-08	2025-05-22	3503855	吴爱民	1	70Y	颈椎骨折	颈椎病;腰椎间盘突出;腰椎峡部裂;头皮挫伤;慢性支气管炎;支气管扩张(症);创伤性胸腔积液;主动脉钙化;骨质疏松;肾结石;下肢动脉粥样硬化;静脉疾患	治愈	毛方敏	毛方敏	万峻莱	颈椎骨折切开复位内固定术;颅骨牵引术;前入路颈椎融合术;颈椎间盘切除术;金属脊椎融合物置入术;2-3个椎骨融合或再融合;颈椎植骨术
14825	O211脊柱外科	2025-05-13	2025-05-22	3503864	戴朋祥	1	63Y	腰椎间盘突出	陈旧性腰椎骨折;腰椎退行性病变;糖尿病;肝硬化;脾大;肺钙化	治愈	林仲可	林仲可	王胜	腰椎间盘切除术;脊髓和神经根粘连的松解术;经皮椎间盘电热纤维环成形术(IDET);黄韧带部分切除术
14826	O211脊柱外科	2025-05-13	2025-05-22	3503866	王金华	2	62Y	腰椎骨折	骨质疏松;腰椎退行性病变;二尖瓣反流;肝胆管扩张;乙型病毒性肝炎;心功能不全;椎间盘膨隆	治愈	林仲可	林仲可	王胜	腰椎骨折切开复位内固定术;经皮椎骨成形术
14827	O211脊柱外科	2025-05-14	2025-05-22	3503869	朱雪艳	2	80Y	骨质疏松伴有病理性骨折，其他的	胸椎骨折;腰椎术后	好转	王向阳	盛孙仁	朱思品	胸椎骨折球囊扩张成形术
14828	O211脊柱外科	2025-05-17	2025-05-22	3503872	林清董	1	71Y	胸椎多处骨折	腰椎退行性病变;腰椎间盘突出;胃部分后天性缺失	治愈	王向阳	盛孙仁	朱思品	胸椎骨折球囊扩张成形术
14829	O211脊柱外科	2025-05-16	2025-05-22	3503880	王玉莲	2	70Y	骨质疏松伴有病理性骨折，其他的	胸椎压缩性骨折;腰椎间盘突出;高血压;高脂血症;脂肪肝;后天性肾囊肿;肾结石	好转	林焱	许聪	许聪	胸椎骨折球囊扩张成形术
14830	O211脊柱外科	2025-05-14	2025-05-25	3504641	陈金美	1	53Y	胸椎多处骨折	肩胛骨骨折;肋骨多处骨折;开放性面部损伤	治愈	王向阳	盛孙仁	朱思品	胸椎骨折切开复位内固定术;胸椎植骨术
14831	O211脊柱外科	2025-05-22	2025-05-25	3504642	王永余	1	65Y	取除骨折内固定装置	骨折术后;高血压;糖尿病不伴有并发症;心功能不全;甲状腺结节;胆囊结石;二尖瓣反流	其他	林仲可	王胜	陈钰	脊柱内固定装置去除术
14832	O211脊柱外科	2025-05-20	2025-05-25	3504668	林津津	2	75Y	老年性骨质疏松伴病理性骨折	腰椎压缩性骨折;骨折术后;颈椎间盘突出;脊柱侧弯;脱髓鞘性脊髓病;神经源性膀胱;腔隙性脑梗死;高血压;下肢动脉粥样硬化;脂肪肝;肾结石	好转	林焱	许聪	许聪	腰椎骨折球囊扩张成形术
14833	O211脊柱外科	2025-05-17	2025-05-25	3504670	柳火堂	1	48Y	胸椎骨折	神经损伤;鹰嘴骨折;肺诊断性影像异常;后天性肾囊肿	治愈	林仲可	王胜	王胜	胸椎骨折切开复位内固定术
14834	O211脊柱外科	2025-05-16	2025-05-25	3504687	董希都	1	60Y	取除骨折内固定装置	高血压;前列腺增生;前列腺结石	其他	林焱	许聪	许聪	脊柱内固定装置去除术
14835	O211脊柱外科	2025-05-07	2025-05-26	3505035	朱建忠	1	55Y	胸椎多处骨折	脊柱血管瘤;颈椎间盘突出;腰椎间盘突出;肋骨多处骨折;胆囊息肉;眼睑淤血;高血压	好转	毛方敏	毛方敏	万峻莱	胸椎骨折切开复位内固定术;经皮椎骨成形术
14836	O211脊柱外科	2025-05-26	2025-05-29	3505890	何振钧	1	64Y	腰椎骨折L1	肺术后;下肢动脉粥样硬化;肝囊肿	治愈	王向阳	盛孙仁	朱思品	腰椎骨折球囊扩张成形术
14837	O211脊柱外科	2025-05-28	2025-05-30	3506368	陈爱华	2	70Y	骨质疏松伴有病理性骨折，其他的	胸椎骨折;腰椎间盘突出;胸椎退行性病变;肺部感染;胸腔积液;肝囊肿;下肢动脉粥样硬化;下肢静脉肌间血栓形成;心功能不全	好转	林仲可	林仲可	王胜	胸椎骨折球囊扩张成形术
14838	O211脊柱外科	2025-05-22	2025-06-01	3506767	蒋美刊	1	67Y	颈部脊髓损伤	颈椎椎管狭窄;颈椎间盘突出;顶骨骨折;面部软组织挫伤;前列腺增生	好转	王向阳	盛孙仁	朱思品	颈椎后路单开门椎管减压术
14839	O211脊柱外科	2025-05-21	2025-06-01	3506770	王美燕	2	51Y	腰椎前移	腰椎峡部裂;腰椎椎管狭窄;陈旧性腰椎骨折;高血压;脂肪肝;肾结石	治愈	王向阳	盛孙仁	朱思品	腰椎椎体间融合术，后入路;腰椎间盘切除伴椎板切除术;金属脊椎融合物置入术;2-3个椎骨融合或再融合;脊髓神经根粘连松解术;黄韧带部分切除术
14840	O211脊柱外科	2025-05-21	2025-06-02	3507084	朱文杰	1	32Y	取除骨折内固定装置	骨折术后;脂肪肝	其他	林焱	许聪	许聪	脊柱内固定装置去除术;跟骨内固定物取出术
14841	O211脊柱外科	2025-05-23	2025-06-02	3507085	王路华	1	45Y	胸椎多处骨折	多发性腰椎骨折;多处挫伤;锁骨骨折	好转	王向阳	盛孙仁	朱思品
14842	O211脊柱外科	2025-05-26	2025-06-04	3507734	叶玉兰	2	54Y	取除骨折内固定装置	脂肪肝	其他	毛方敏	毛方敏	万峻莱	脊柱内固定装置去除术
14843	O211脊柱外科	2025-05-19	2025-06-04	3507736	谢碎华	2	54Y	腰椎骨折	腰椎间盘突出;脂肪肝;静脉疾患	治愈	毛方敏	毛方敏	万峻莱	腰椎骨折切开复位内固定术
14844	O211脊柱外科	2025-05-30	2025-06-05	3508181	金彬芬	2	83Y	骨质疏松伴有病理性骨折，其他的	陈旧性胸椎骨折;胸椎骨折;慢性支气管炎;脂肪肝;肺肿物;肾错构瘤	好转	林焱	许聪	许聪	胸椎骨折球囊扩张成形术
14845	O211脊柱外科	2025-06-02	2025-06-06	3508488	徐棉妹	2	73Y	胸椎骨折	骨质疏松，其他的;高血压;乳腺术后;脂肪肝;肝囊肿;下肢动脉粥样硬化;肾错构瘤;乳腺恶性肿瘤	好转	林焱	许聪	许聪	胸椎骨折球囊扩张成形术
14846	O211脊柱外科	2025-05-23	2025-06-07	3508739	张祖清	1	53Y	腰椎骨折	胸椎骨折;高血压;糖尿病;肾结石;前列腺增生;前列腺结石	治愈	毛方敏	毛方敏	万峻莱	腰椎骨折切开复位内固定术;胸椎骨折切开复位内固定术
14847	O211脊柱外科	2025-05-27	2025-06-07	3508740	吴少媚	2	68Y	腰椎骨折	骨质疏松;支气管扩张伴感染;肺肿物;心功能不全	治愈	王向阳	盛孙仁	朱思品	腰椎骨折切开复位内固定术
14848	O211脊柱外科	2025-05-19	2025-06-10	3509738	鲍巧真	2	18Y	手术后切口感染	骨折术后;精神分裂症	好转	林焱	许聪	许聪	皮肤和皮下坏死组织切除清创术
14849	O211脊柱外科	2025-05-29	2025-06-11	3510073	林顶新	2	55Y	腰椎骨折	腹部和下背及骨盆软组织损伤;肺肿物;肝囊肿;胸椎骨折	好转	林焱	许聪	许聪	腰椎骨折切开复位内固定术;腰椎椎体间融合术，后入路;腰椎植骨术;椎弓根钉内固定术
14850	O211脊柱外科	2025-06-02	2025-06-11	3510147	叶德明	1	66Y	骨质疏松伴有病理性骨折，其他的	腰椎压缩性骨折;腰椎间盘突出;腰椎退行性病变;胸椎退行性病变;脊柱侧弯;心功能不全;胆囊结石;腰椎间盘变性;主动脉瓣疾患，其他的	好转	林仲可	王胜	王胜	腰椎骨折切开复位内固定术;经皮椎骨成形术
14851	O211脊柱外科	2025-06-02	2025-06-12	3510406	蔡秀格	1	39Y	腰椎骨折		治愈	毛方敏	毛方敏	万峻莱	腰椎骨折切开复位内固定术
14852	O211脊柱外科	2025-05-31	2025-06-12	3510409	叶杏蕊	2	66Y	腰椎骨折	腰椎间盘突出	治愈	毛方敏	毛方敏	万峻莱	腰椎骨折切开复位内固定术
14853	O211脊柱外科	2025-05-31	2025-06-12	3510487	潘琴赛	2	46Y	胸椎骨折	颈椎间盘突出;胆囊息肉	治愈	毛方敏	毛方敏	万峻莱	胸椎骨折切开复位内固定术
14854	O211脊柱外科	2025-05-31	2025-06-12	3510503	夏光荣	1	66Y	腰椎骨折	足骨折;脊柱血管瘤;高血压;糖尿病;主动脉硬化;脂肪肝;前列腺增生;前列腺结石	治愈	毛方敏	毛方敏	万峻莱	腰椎骨折球囊扩张成形术
14855	O211脊柱外科	2025-05-29	2025-06-12	3510594	胡建春	2	57Y	胸椎多处骨折	肋骨多处骨折	好转	王向阳	盛孙仁	朱思品	胸椎骨折切开复位内固定术;胸椎融合术，后入路;胸椎椎板切除减压术;胸椎植骨术
14856	O211脊柱外科	2025-06-08	2025-06-13	3510892	郑连华	2	61Y	胸椎骨折	骨质疏松;室性期前收缩;脊椎退行性病变;心功能不全;脂肪肝	治愈	林仲可	林仲可	王胜	胸椎骨折球囊扩张成形术
14857	O211脊柱外科	2025-06-01	2025-06-13	3510904	金文购	1	42Y	颈部脊髓损伤	颈椎骨折;颈椎间盘突出;胸椎骨折;肝回声不均	好转	毛方敏	毛方敏	万峻莱	颈椎后路单开门椎管减压术
14858	O211脊柱外科	2025-05-26	2025-06-14	3511073	蔡邦琅	1	53Y	腰椎骨折L2	颈椎间盘突出;肝回声不均;后天性肾囊肿;前列腺结石;肠胀气	治愈	毛方敏	毛方敏	万峻莱	腰椎骨折切开复位内固定术
14859	O211脊柱外科	2025-06-10	2025-06-15	3511401	潘信理	2	64Y	腰椎骨折L1	骨质疏松;后天性肾囊肿;心功能不全;腰椎间盘突出	治愈	林仲可	王胜	王胜	腰椎骨折球囊扩张成形术
14860	O211脊柱外科	2025-05-31	2025-06-15	3511405	李陈伍	1	72Y	颈椎骨折	胸椎骨折;颈椎病;胸骨骨折;主动脉钙化;脂肪肝;后天性肾囊肿;前列腺增生;腔隙性脑梗死;老年性脑萎缩;前列腺结石	好转	毛方敏	毛方敏	万峻莱
14861	O211脊柱外科	2025-06-03	2025-06-15	3511406	刘松华	2	62Y	胸椎骨折	胸椎骨折;骨质疏松;高血压;焦虑［回避］型人格障碍	好转	林焱	许聪	许聪	腰椎骨折切开复位内固定术;胸椎骨折切开复位内固定术
14862	O211脊柱外科	2025-06-07	2025-06-16	3511797	王昌连	2	57Y	腰椎骨折	创伤性湿肺	好转	林焱	许聪	许聪	腰椎骨折切开复位内固定术
14863	O211脊柱外科	2025-06-08	2025-06-17	3512083	赵小华	2	48Y	腰椎骨折	慢性胃炎;脂肪肝	好转	林焱	许聪	许聪	腰椎骨折切开复位内固定术;椎管减压术
14864	O211脊柱外科	2025-06-13	2025-06-17	3512145	陈采茶	2	52Y	取除骨折内固定装置	中度贫血;高血压;胆囊息肉;脊柱侧弯	其他	林仲可	王胜	王胜	脊柱内固定装置去除术
14865	O211脊柱外科	2025-06-14	2025-06-17	3512155	陈凤珠	2	54Y	骨质疏松伴有病理性骨折，其他的	腰椎骨折;主动脉钙化;心包积液;肝囊肿;先天性静脉扩张	好转	毛方敏	毛方敏	万峻莱	经皮穿刺脊柱后凸成形术;经皮椎骨成形术
14866	O211脊柱外科	2025-06-09	2025-06-18	3512479	黄玉芬	2	65Y	腰椎骨折	骨质疏松;慢性胃炎;后天性肾囊肿;肾结石	好转	林焱	许聪	许聪	腰椎骨折切开复位内固定术
14867	O211脊柱外科	2025-06-12	2025-06-18	3512565	杜成勉	1	87Y	骨质疏松伴有病理性骨折，其他的	腰椎骨折;脊柱血管瘤;腰椎间盘突出;颈椎间盘突出;肝回声不均;脾大;后天性肾囊肿;前列腺增生;前列腺结石	好转	毛方敏	毛方敏	万峻莱	腰椎骨折球囊扩张成形术
14868	O211脊柱外科	2025-06-15	2025-06-19	3512900	杨春弟	2	73Y	骨质疏松伴有病理性骨折，其他的	腰椎压缩性骨折;高血压;脂肪肝;肾盂积水，其他的;后天性肾囊肿	好转	林焱	许聪	许聪	腰椎骨折球囊扩张成形术
14869	O211脊柱外科	2025-06-08	2025-06-19	3512923	施勇杰	1	52Y	颈椎骨折	颈椎间盘突出;高血压;脂肪肝;后天性肾囊肿;腰椎间盘突出	治愈	王向阳	盛孙仁	朱思品	前入路颈椎融合术;颈椎间盘切除伴椎管减压术;颈椎植骨术;2-3个椎骨融合或再融合;金属脊椎融合物置入术
14870	O211脊柱外科	2025-06-16	2025-06-20	3513195	林春香	2	65Y	胸椎骨折	高血压;腰椎侧弯;腰椎间盘突出;后天性肾囊肿;脂肪肝;肺大疱;肺肿物	好转	林焱	许聪	许聪	胸椎骨折球囊扩张成形术
14871	O211脊柱外科	2025-06-13	2025-06-21	3513335	付佳	1	29Y	取除骨折内固定装置		其他	毛方敏	毛方敏	万峻莱	脊柱内固定装置去除术
14872	O211脊柱外科	2025-06-10	2025-06-22	3513541	胡圣马	1	74Y	颈部脊髓损伤	颈椎骨折C6;面部软组织挫伤;胆囊结石	好转	王向阳	盛孙仁	朱思品	前入路颈椎融合术;颅骨牵引术;前入路颈椎间盘切除术;金属脊椎融合物置入术;2-3个椎骨融合或再融合;颈椎植骨术
14873	O211脊柱外科	2025-06-11	2025-06-22	3513555	陈贵青	2	41Y	腰椎骨折	胆囊胆固醇沉着症;肾错构瘤	好转	毛方敏	毛方敏	万峻莱	腰椎骨折切开复位内固定术
14874	O211脊柱外科	2025-06-10	2025-06-22	3513584	陈德光	1	77Y	第二颈椎骨折	颈椎间盘突出;高血压;冠状动脉粥样硬化性心脏病;外踝骨折;足骨折;脂肪肝;后天性肾囊肿	治愈	王向阳	盛孙仁	朱思品	齿状突骨折切开复位内固定术;寰-枢椎融合术，后入路;颈椎植骨术;2-3个椎骨融合或再融合
14875	O211脊柱外科	2025-06-18	2025-06-22	3513676	黄茶香	2	72Y	胸椎骨折	高血压;脂肪肝	治愈	王向阳	盛孙仁	朱思品	胸椎骨折球囊扩张成形术
14876	O211脊柱外科	2025-06-17	2025-06-23	3514032	杨细花	2	64Y	胸椎骨折	骨质疏松，其他的;心功能不全;肺诊断性影像异常;高血压;腰椎间盘突出	治愈	林仲可	王胜	王胜	胸椎骨折球囊扩张成形术;椎骨活组织检查
14877	O211脊柱外科	2025-06-18	2025-06-23	3514033	赵万春	1	79Y	骨质疏松伴有病理性骨折，其他的	腰椎骨折L4;下肢动脉粥样硬化;多发性肝囊肿;后天性肾囊肿;肾结石;前列腺增生;心功能不全;前列腺结石	好转	王向阳	盛孙仁	朱思品	腰椎骨折球囊扩张成形术
14878	O211脊柱外科	2025-06-15	2025-06-24	3514399	丁宗珍	1	53Y	胸椎压缩性骨折	腰椎间盘突出;2型糖尿病;棘突间韧带综合征	治愈	林焱	许聪	许聪	胸椎骨折切开复位内固定术
14879	O211脊柱外科	2025-06-19	2025-06-24	3514409	郑金媚	2	69Y	腰椎压缩性骨折	糖尿病;甲状腺术后;下肢动脉粥样硬化;肾占位性病变;心功能不全;腰椎间盘突出;二尖瓣和主动脉瓣的疾患;老年性骨质疏松;腰椎退行性病变;腰椎前移;高血压	治愈	林仲可	林仲可	王胜	腰椎骨折球囊扩张成形术;椎骨活组织检查
14880	O211脊柱外科	2025-06-20	2025-06-24	3514515	施金菊	2	86Y	骨质疏松伴有病理性骨折，其他的	腰椎压缩性骨折;腰椎前移;高血压;肝钙化灶;心功能不全	好转	林仲可	王胜	王胜	腰椎骨折球囊扩张成形术
14881	O211脊柱外科	2025-06-20	2025-06-24	3514581	方菊花	2	64Y	骨质疏松伴有病理性骨折，其他的	胸椎压缩性骨折;腰椎压缩性骨折;腰椎间盘突出;脊柱血管瘤;心功能不全;肺肿物	好转	林仲可	王胜	王胜	胸椎骨折球囊扩张成形术;腰椎骨折球囊扩张成形术
14882	O211脊柱外科	2025-06-23	2025-06-26	3515017	陈爱玉	2	74Y	骨质疏松伴有病理性骨折，其他的	胸椎压缩性骨折;腰椎间盘突出;高血压;白内障;陈旧性胸椎骨折	好转	林焱	许聪	许聪	胸椎骨折球囊扩张成形术
14883	O211脊柱外科	2025-05-30	2025-06-26	3515021	彭金波	1	55Y	颈部脊髓损伤	颈椎间盘突出;头部的损伤;眶骨骨折;颅腔积气;多处挫伤;胸部损伤;肺挫伤;肺气肿;肝囊肿;后天性肾囊肿;颈椎退行性病变;前列腺钙化灶	好转	王向阳	盛孙仁	朱思品	前入路颈椎融合术;眶骨骨折切开复位内固定术;金属脊椎融合物置入术;2-3个椎骨融合或再融合;颈椎间盘切除术;颈椎植骨术
14884	O211脊柱外科	2025-06-23	2025-06-26	3515043	吴善忠	1	46Y	肿瘤性病理性骨折	腰椎压缩性骨折;多发性骨髓瘤;肺肿物;肺大疱	未愈	林焱	许聪	许聪
14885	O211脊柱外科	2025-06-22	2025-06-26	3515071	金玉如	2	75Y	胸椎骨折	骨质疏松	好转	毛方敏	毛方敏	万峻莱	胸椎骨折球囊扩张成形术
14886	O211脊柱外科	2025-06-20	2025-06-27	3515290	顾莲莲	2	84Y	骨质疏松伴有病理性骨折，其他的	骶骨骨折;尾骨骨折;腰椎压缩性骨折;腰椎间盘突出;阿尔茨海默病;腔隙性脑梗死;动脉粥样硬化;高血压;2型糖尿病;胆囊结石;后天性肾囊肿	好转	林焱	许聪	许聪	腰椎骨折球囊扩张成形术
14887	O211脊柱外科	2025-06-23	2025-06-27	3515292	林爱玲	2	58Y	腰椎骨折	骨质疏松，其他的;高血压;脂肪肝;肺肿物	好转	林焱	许聪	许聪	腰椎骨折球囊扩张成形术
14888	O211脊柱外科	2025-06-26	2025-06-29	3515729	钟先秀	2	72Y	腰椎骨折	骨质疏松;高血压;甲状腺功能减退症;类风湿性关节炎	好转	林焱	许聪	许聪	腰椎骨折球囊扩张成形术
14889	O211脊柱外科	2025-06-22	2025-06-29	3515748	徐良环	1	55Y	取除骨折内固定装置	肝钙化灶;前列腺增生;下肢动脉粥样硬化;肝回声不均	其他	毛方敏	毛方敏	万峻莱	脊柱内固定装置去除术
14890	O211脊柱外科	2025-06-26	2025-06-29	3515758	李凤蕊	2	66Y	心功能不全	腰椎骨折;陈旧性腰椎骨折;骨质疏松伴有病理性骨折;腰椎间盘突出;脊椎退行性病变;糖尿病;脂肪肝;肾结石;特发性肺纤维化;肺结节病	未愈	林仲可	林仲可	王胜	腰椎骨折球囊扩张成形术
14891	O211脊柱外科	2025-06-26	2025-06-30	3516019	朱素娇	2	68Y	骨质疏松伴有病理性骨折，其他的	陈旧性脊柱骨折;胸椎压缩性骨折;胃部分后天性缺失;胆囊切除术后状态	好转	林焱	许聪	许聪	胸椎骨折球囊扩张成形术
14892	O211脊柱外科	2025-06-23	2025-06-30	3516020	陈继和	1	62Y	胸椎骨折		治愈	王向阳	盛孙仁	朱思品	胸椎骨折球囊扩张成形术
14893	O211脊柱外科	2025-06-19	2025-07-01	3516431	曾学义	1	63Y	多发性腰椎骨折	胸椎骨折;乙肝表面抗原携带者	好转	林焱	林焱	许聪	腰椎骨折切开复位内固定术
14894	O211脊柱外科	2025-06-26	2025-07-01	3516435	吴兴旺	1	65Y	腰椎骨折	脂肪肝;胆囊息肉;肾结石;前列腺增生;前列腺结石	治愈	毛方敏	毛方敏	万峻莱	腰椎骨折球囊扩张成形术
14895	O211脊柱外科	2025-06-26	2025-07-02	3516723	吕宝珠	2	72Y	腰椎压缩性骨折	骨质疏松;高血压;脑血管病后遗症，其他和未特指的;非毒性多个甲状腺结节;肝钙化灶;肾结石;后天性肾囊肿;肾钙化	好转	林焱	林焱	许聪	腰椎骨折球囊扩张成形术
14896	O211脊柱外科	2025-06-27	2025-07-02	3516757	林斌连	2	75Y	骨质疏松伴有病理性骨折，其他的	腰椎骨折L4;后天性肾囊肿;肾术后;肾结石	好转	林焱	许聪	许聪	腰椎骨折球囊扩张成形术
14897	O211脊柱外科	2025-05-28	2025-07-03	3517086	陈彩仙	2	45Y	椎体感染	创伤后食管瘘;胸椎骨折;颈椎术后;胸椎后纵韧带骨化;胸椎椎管狭窄;肋骨骨折;乙型病毒性肝炎;脂肪肝;肾超声检查异常;特发性肺纤维化	好转	王向阳	盛孙仁	朱思品	内镜下椎间隙病灶清除引流术;内镜下腰椎髓核切除术
14898	O211脊柱外科	2025-06-29	2025-07-03	3517272	张淑兰	2	87Y	胸椎骨折	胆囊结石;后天性肾囊肿;下肢动脉粥样硬化;先天性静脉扩张;主动脉硬化	治愈	毛方敏	毛方敏	万峻莱	胸椎骨折球囊扩张成形术
14899	O211脊柱外科	2025-06-30	2025-07-04	3517454	黄彭玲	2	59Y	腰椎压缩性骨折	骨质疏松;脂肪肝;肾结石;心功能不全;单纯性甲状腺肿	好转	林焱	林焱	许聪	腰椎骨折球囊扩张成形术
14900	O211脊柱外科	2025-06-28	2025-07-04	3517462	林茂清	1	64Y	骨质疏松伴有病理性骨折，其他的	胸椎多处骨折;心功能不全;腰椎间盘突出;多发性肝囊肿;胆囊胆固醇沉着症;前列腺增生;前列腺结石	好转	林仲可	王胜	王胜	胸椎骨折切开复位内固定术;经皮椎骨成形术;胸椎植骨术
14901	O211脊柱外科	2025-06-28	2025-07-05	3517802	潘彩味	2	64Y	骨质疏松伴有病理性骨折，其他的	胸椎多处骨折;脂肪肝	好转	毛方敏	毛方敏	万峻莱	胸椎骨折球囊扩张成形术
14902	O211脊柱外科	2025-07-03	2025-07-06	3518171	吴春兰	2	69Y	骨质疏松伴有病理性骨折，其他的	胸椎骨折;肺气肿;脑缺血灶;肺动脉高压;二尖瓣反流;主动脉瓣疾患，其他的;胸腔积液;胸椎退行性病变;下肢动脉粥样硬化;心功能不全	好转	林仲可	林仲可	林仲可	胸椎骨折球囊扩张成形术;椎骨活组织检查
14903	O211脊柱外科	2025-06-29	2025-07-06	3518206	陈金飞	1	56Y	取除骨折内固定装置	腰椎退行性病变;肺诊断性影像异常;脂肪肝	其他	林焱	林焱	许聪	脊柱内固定装置去除术
14904	O211脊柱外科	2025-07-04	2025-07-07	3518521	王秀媚	2	73Y	骨质疏松伴有病理性骨折，其他的	陈旧性腰椎骨折;高血压;糖尿病不伴有并发症	好转	林焱	林焱	许聪
14905	O211脊柱外科	2025-07-04	2025-07-07	3518541	陈平妹	1	65Y	胸椎骨折	腰椎间盘突出;肺气肿;甲状腺结节;心功能不全;腰椎退行性病变;主动脉瓣疾患，其他的	治愈	王向阳	盛孙仁	朱思品	胸椎骨折球囊扩张成形术
14906	O211脊柱外科	2025-06-23	2025-07-08	3518962	李少莲	2	65Y	腰椎间盘突出	胸腰椎椎管狭窄;胸椎术后;陈旧性肋骨骨折;心功能不全;肺肿物;脂肪肝;胆囊结石	好转	林焱	林焱	许聪	经椎间孔入路腰椎体融合术;腰椎间盘切除伴椎管减压术;金属脊椎融合物置入术;2-3个椎骨融合或再融合;黄韧带部分切除术;腰椎间盘造影
14907	O211脊柱外科	2025-07-04	2025-07-09	3519163	朱成超	1	85Y	胸椎骨折	多处挫伤;后天性肾囊肿;前列腺增生;下肢动脉粥样硬化	好转	林焱	林焱	许聪	胸椎骨折球囊扩张成形术
14908	O211脊柱外科	2025-06-29	2025-07-09	3519259	徐彩香	2	65Y	腰椎前移	腰椎压缩性骨折;腰椎间盘突出;骨质疏松;腰椎不稳定;腰椎椎管狭窄	好转	林焱	林焱	许聪	经椎间孔入路腰椎体融合术;腰椎间盘切除伴椎板切除术;2-3个椎骨融合或再融合;黄韧带部分切除术;金属脊椎融合物置入术;腰椎间盘造影
14909	O211脊柱外科	2025-07-02	2025-07-09	3519262	蒋玉兰	2	65Y	腰椎压缩性骨折	腰椎间盘突出;胆囊结石;陈旧性腰椎骨折	好转	毛方敏	毛方敏	万峻莱	腰椎骨折球囊扩张成形术
14910	O211脊柱外科	2025-06-26	2025-07-09	3519269	陈素娟	2	58Y	腰椎骨折L2	胫骨上端骨折;肱骨外科颈骨折;耻骨骨折;骶骨骨折;高血压;心功能不全;胆囊息肉;腰椎椎间盘炎;腰椎间盘突出;创伤性胸腔积液;主动脉钙化	治愈	王向阳	盛孙仁	朱思品	腰椎骨折球囊扩张成形术;胫骨骨折闭合复位髓内针内固定术;胫骨骨折切开复位内固定术
14911	O211脊柱外科	2025-07-03	2025-07-09	3519307	陈连英	2	73Y	腰椎骨折L1	腰椎椎管狭窄;腰椎不稳定;骨质疏松伴有病理性骨折	好转	林焱	林焱	许聪	腰椎骨折球囊扩张成形术
14912	O211脊柱外科	2025-07-02	2025-07-10	3519689	陈阿玉	2	76Y	骨质疏松伴有病理性骨折，其他的	胸椎压缩性骨折;血管瘤;腰椎前移;腰椎峡部裂;腰椎间盘突出;腰椎椎管狭窄;腰椎压缩性骨折;肺肿物;脂肪肝;肝囊肿;胆囊结石;心功能不全;高血压	好转	林焱	林焱	许聪	腰椎骨折球囊扩张成形术;胸椎骨折球囊扩张成形术
14913	O211脊柱外科	2025-06-29	2025-07-10	3519691	易雪娇	2	57Y	腰椎椎管狭窄	腰椎压缩性骨折;腰椎间盘突出;多处挫伤	好转	林焱	林焱	许聪	经椎间孔入路腰椎体融合术;腰椎间盘切除伴椎管减压术;2-3个椎骨融合或再融合;金属脊椎融合物置入术;黄韧带部分切除术;腰椎骨折球囊扩张成形术
14914	O211脊柱外科	2025-07-07	2025-07-11	3519994	金有妹	2	77Y	腰椎骨折L1	骨质疏松，其他的;肺肿物;纵隔淋巴结肿大;脊椎退行性病变;脊柱血管瘤;胆囊结石;二尖瓣反流;主动脉瓣疾患，其他的;主动脉钙化;下肢动脉粥样硬化;乳腺术后;恶性肿瘤个人史	治愈	林仲可	王胜	王胜	腰椎骨折球囊扩张成形术;椎骨活组织检查
14915	O211脊柱外科	2025-07-01	2025-07-13	3519692	金上崇	1	65Y	腰椎压缩性骨折	胸椎压缩性骨折;肩胛骨骨折;头皮血肿;肌腱和肌肉损伤;脂肪肝;心功能不全;前列腺增生;前列腺结石	治愈	王向阳	盛孙仁	朱思品	腰椎骨折球囊扩张成形术;胸椎骨折球囊扩张成形术
14916	O211脊柱外科	2025-07-07	2025-07-13	3520674	林爱连	2	70Y	腰椎骨折	腰椎间盘突出;高血压;胸椎间盘突出	治愈	毛方敏	毛方敏	万峻莱	腰椎骨折球囊扩张成形术
14917	O211脊柱外科	2025-07-06	2025-07-14	3521124	李冬业	2	57Y	腰椎骨折	骨质疏松;腰椎间盘突出;后天性肾囊肿;心功能不全;高血压;心脏扩大;二尖瓣和主动脉瓣的疾患;静脉疾患	治愈	王向阳	盛孙仁	朱思品	腰椎骨折切开复位内固定术
14918	O211脊柱外科	2025-07-04	2025-07-14	3521128	吴阿生	1	58Y	颈椎棘突骨折	颧骨骨折;头部的损伤;胸椎骨折;腰骶椎骨骨折;脊椎退行性病变;颈椎间盘突出;腰椎间盘突出;肺肿物;主动脉钙化;冠状动脉粥样硬化;前列腺钙化灶;前列腺结石;二尖瓣反流;主动脉瓣疾患，其他的;甲状腺结节	好转	林仲可	林仲可	林仲可
14919	O211脊柱外科	2025-06-24	2025-07-14	3521135	王保春	1	49Y	腰椎骨折	胸椎骨折;膀胱术后;腰椎退行性病变;骶骨骨折;二尖瓣反流;心功能不全;脂肪肝;肾结石;前列腺增生;前列腺结石	治愈	林仲可	林仲可	林仲可	腰椎骨折切开复位内固定术;经皮耻骨上膀胱造口导尿管插入术;膀胱穿刺术
14920	O211脊柱外科	2025-07-12	2025-07-15	3521610	吕碧微	2	66Y	腰椎压缩性骨折	骨质疏松;腰椎间盘突出;特发性肺纤维化;心功能不全;脂肪肝;肝囊肿;下肢动脉粥样硬化;二尖瓣反流	治愈	王向阳	盛孙仁	朱思品	腰椎骨折球囊扩张成形术
14921	O211脊柱外科	2025-07-12	2025-07-16	3521955	孙何英	2	88Y	胸椎压缩性骨折	骨质疏松;腰椎间盘突出;心功能不全;脂肪肝	好转	林焱	林焱	许聪	胸椎骨折球囊扩张成形术
14922	O211脊柱外科	2025-07-10	2025-07-16	3521958	王仁里	1	83Y	骨质疏松伴有病理性骨折	腰椎骨折L1;骨折术后;心功能不全;胆囊结石;前列腺增生;下肢动脉粥样硬化;前列腺结石	好转	林焱	林焱	许聪	腰椎骨折球囊扩张成形术
14923	O211脊柱外科	2025-07-10	2025-07-16	3521964	倪春芬	2	50Y	胸椎骨折	骨质疏松，其他的;高血压;类风湿性关节炎;心功能不全;脊柱后凸;陈旧性胸椎骨折;胸椎退行性病变;甲状腺肿;颅内脂肪瘤;特发性肺纤维化	治愈	林仲可	王胜	王胜	胸椎骨折球囊扩张成形术;椎骨活组织检查
14924	O211脊柱外科	2025-07-11	2025-07-16	3521970	蔡丽琴	2	62Y	腰椎压缩性骨折	骨质疏松;腰椎楔形变;胸椎退行性病变;高血压;糖尿病;肾结石;胆囊息肉;老年性心脏瓣膜病;椎间盘膨隆;腰椎退行性病变;主动脉瓣疾患，其他的;心功能不全	治愈	林仲可	林仲可	林仲可	腰椎骨折球囊扩张成形术;椎骨活组织检查
14925	O211脊柱外科	2025-07-13	2025-07-17	3522484	杨一凡	1	10Y	脊柱肿瘤	病理性骨折，不可归类在他处者;脊柱后凸	未愈	王向阳	盛孙仁	朱思品	脊柱关节活组织检查
14926	O211脊柱外科	2025-07-10	2025-07-17	3522498	厉爱美	2	64Y	骨质疏松伴有病理性骨折，其他的	胸椎骨折;脂肪肝;下肢动脉粥样硬化;先天性静脉扩张	好转	毛方敏	毛方敏	万峻莱	胸椎骨折球囊扩张成形术
14927	O211脊柱外科	2025-07-12	2025-07-17	3522511	李秋香	2	69Y	骨质疏松伴有病理性骨折，其他的	胸椎骨折;腰椎骨折;腰椎间盘突出;肝回声不均;高血压;脑梗死	好转	毛方敏	毛方敏	万峻莱	腰椎骨折球囊扩张成形术;胸椎骨折球囊扩张成形术
14928	O211脊柱外科	2025-07-12	2025-07-18	3522883	谢玉兰	2	69Y	腰椎骨折	高血压2级;心功能不全;心房颤动;骨质疏松;肾占位性病变;脊柱后凸;腰椎退行性病变;脊柱血管瘤;椎间盘突出;腰椎前移;腰椎峡部裂;主动脉钙化;后天性肾囊肿;脂肪肝;肾结石	治愈	王胜	王胜	王胜	腰椎骨折球囊扩张成形术;椎骨活组织检查
14929	O211脊柱外科	2025-07-08	2025-07-20	3523375	刘金玉	1	57Y	取除骨折内固定装置	痛风;下肢动脉粥样硬化;脂肪肝;胆囊息肉;肾积水伴肾输尿管结石;前列腺结石;前列腺增生	其他	毛方敏	毛方敏	万峻莱	脊柱内固定装置去除术
14930	O211脊柱外科	2025-07-04	2025-07-20	3523405	孔宪杨	1	91Y	颈部脊髓损伤	颈椎脱位;颈椎骨折;泌尿道感染;颈椎间盘突出;颈椎退行性病变;多发性脑梗死;胆囊结石;后天性肾囊肿;老年性心脏瓣膜病	好转	林仲可	林仲可	林仲可	颈椎间盘切除术;金属脊椎融合物置入术;2-3个椎骨融合或再融合;颈椎植骨术;前入路颈椎融合术;颅骨牵引术
14931	O211脊柱外科	2025-07-10	2025-07-20	3523407	李丕强	1	46Y	取除骨折内固定装置	颈椎术后;腰椎间盘突出;脂肪肝;前列腺结石;糖尿病不伴有并发症	其他	毛方敏	毛方敏	万峻莱	脊柱内固定装置去除术
14932	O211脊柱外科	2025-07-09	2025-07-20	3523409	胡育留	1	54Y	颈椎棘突骨折	胸椎骨折;颈椎间盘突出;腰椎间盘突出;心功能不全;创伤性胸腔积液	好转	王向阳	盛孙仁	朱思品
14933	O211脊柱外科	2025-07-08	2025-07-21	3523807	李月凤	2	71Y	腰椎骨折	骨质疏松;高血压;糖尿病;腰椎退行性病变;腰椎侧弯;腰椎间盘突出;输尿管结石;输尿管扩张;肾盂积水，其他的;肾超声检查异常;肾结石;后天性肾囊肿;脑出血个人史;脑缺血灶;老年性脑萎缩;主动脉瓣疾患，其他的;心功能不全	治愈	林仲可	林仲可	林仲可	腰椎骨折切开复位内固定术;经皮椎骨成形术
14934	O211脊柱外科	2025-07-12	2025-07-22	3524213	林国财	1	40Y	胸椎骨折	腰椎骨折L1;多处挫伤;肋骨多处骨折;脂肪肝;胆囊息肉	好转	林焱	林焱	许聪	胸椎骨折切开复位内固定术;腰椎骨折切开复位内固定术
14935	O211脊柱外科	2025-07-17	2025-07-22	3524243	朱素叶	2	78Y	骨质疏松伴有病理性骨折，其他的	腰椎骨折;高血压;腰椎间盘突出;肺肿物;心功能不全;主动脉钙化;肾钙化	好转	林仲可	王胜	王胜	腰椎骨折球囊扩张成形术;椎骨活组织检查
14936	O211脊柱外科	2025-07-18	2025-07-22	3524387	金花弟	2	88Y	颈椎骨折	腔隙性脑梗死;脱髓鞘性白质脑病;老年性脑萎缩;脑膜瘤;肝回声不均;胆囊肥大;胆总管扩张	好转	毛方敏	毛方敏	万峻莱
14937	O211脊柱外科	2025-07-09	2025-07-23	3524564	谢家钦	1	43Y	胸椎骨折	腰椎骨折L2;颅骨骨折;肋骨骨折;腰椎间盘突出;脂肪肝;肾结石	治愈	王向阳	盛孙仁	朱思品	胸椎骨折切开复位内固定术;胸椎植骨术
14938	O211脊柱外科	2025-07-09	2025-07-23	3524565	汪锡录	1	38Y	颈部脊髓损伤	颈椎间盘突出;颈椎骨折;胸椎骨折;脂肪肝	好转	王向阳	盛孙仁	朱思品	前入路颈椎融合术;前入路颈椎间盘切除术;金属脊椎融合物置入术;2-3个椎骨融合或再融合;颈椎植骨术
14939	O211脊柱外科	2025-07-18	2025-07-23	3524568	胡彩媚	2	70Y	骨质疏松伴有病理性骨折，其他的	腰椎峡部裂;胸椎骨折;糖尿病不伴有并发症;特发性肺纤维化;主动脉钙化;胸椎术后;下肢动脉粥样硬化;心功能不全;二尖瓣和主动脉瓣的疾患;下肢静脉肌间血栓形成;静脉疾患	好转	王向阳	盛孙仁	朱思品	胸椎骨折球囊扩张成形术
14940	O211脊柱外科	2025-07-05	2025-07-23	3524569	郑启敏	1	68Y	颈部脊髓损伤	颈椎椎管狭窄;颈椎间盘突出;肺诊断性影像异常;陈旧性肋骨骨折;主动脉钙化;心功能不全;脂肪肝;肾结石;前列腺增生;前列腺结石;下肢动脉粥样硬化;高血压;糖尿病不伴有并发症	好转	王向阳	盛孙仁	朱思品	颈椎后路单开门椎管减压术;颈椎植骨术
14941	O211脊柱外科	2025-07-17	2025-07-23	3524594	李翠妹	2	73Y	腰椎压缩性骨折	骨质疏松;糖尿病不伴有并发症;心功能不全;主动脉钙化;腰椎退行性病变;主动脉瓣疾患，其他的	治愈	王向阳	盛孙仁	朱思品	腰椎骨折球囊扩张成形术
14942	O211脊柱外科	2025-07-18	2025-07-24	3525016	郑爱英	2	77Y	腰椎压缩性骨折	腰椎前移;骨质疏松;帕金森病;高血压;心功能不全;脂肪肝;胆囊结石;后天性肾囊肿;下肢静脉肌间血栓形成	好转	林焱	林焱	许聪	腰椎骨折球囊扩张成形术
14943	O211脊柱外科	2025-07-21	2025-07-24	3525035	林成荣	1	68Y	腰椎压缩性骨折	骨质疏松;心功能不全;脂肪肝;前列腺增生;前列腺结石;下肢动脉粥样硬化;创伤性胸腔积液;胆囊结石;肝内钙化点;陈旧性肋骨骨折	治愈	王向阳	盛孙仁	朱思品	腰椎骨折球囊扩张成形术
14944	O211脊柱外科	2025-07-21	2025-07-27	3525966	吴恩涛	1	15Y	取除骨折内固定装置		其他	林仲可	林仲可	林仲可	脊柱内固定装置去除术
14945	O211脊柱外科	2025-07-02	2025-07-27	3525983	张高云	1	55Y	腰椎骨折	骶骨骨折;创伤性肾血肿;肝硬化;脾大;前列腺增生;胆囊结石;前列腺钙化灶	治愈	毛方敏	毛方敏	万峻莱	腰椎骨折切开复位内固定术
14946	O211脊柱外科	2025-07-20	2025-07-28	3526409	周菊弟	2	54Y	取除骨折内固定装置	胆囊结石	其他	林焱	林焱	许聪	脊柱内固定装置去除术
14947	O211脊柱外科	2025-07-16	2025-07-28	3526417	支银眉	2	58Y	腰椎骨折	腰椎术后;乳腺术后;乳腺恶性肿瘤	好转	林焱	林焱	许聪	腰椎骨折切开复位内固定术
14948	O211脊柱外科	2025-07-17	2025-07-28	3526419	冯建秋	2	61Y	骨质疏松伴有病理性骨折，其他的	胸椎骨折;肾结石;肺肿物;心功能不全;二尖瓣反流	好转	王向阳	盛孙仁	朱思品	胸椎骨折球囊扩张成形术
14949	O211脊柱外科	2025-07-25	2025-07-29	3526929	陈美乐	2	72Y	胸椎骨折	高血压;糖尿病不伴有并发症;下肢动脉粥样硬化;脂肪肝;心功能不全	治愈	王向阳	盛孙仁	朱思品	胸椎骨折球囊扩张成形术
14950	O211脊柱外科	2025-07-25	2025-07-30	3527134	董小平	2	71Y	骨质疏松伴有病理性骨折，其他的	脊柱血管瘤;腰椎骨折;肺诊断性影像异常;糖尿病不伴有并发症	好转	毛方敏	毛方敏	万峻莱	腰椎骨折球囊扩张成形术;胸椎病损切除术;经皮椎体球囊扩张成形术
14951	O211脊柱外科	2025-07-10	2025-07-30	3527160	王双林	1	40Y	创伤性小肠破裂	多发性腰椎骨折;急性弥漫性腹膜炎;骶骨骨折;耻骨骨折;跖骨骨折;肋骨骨折;头皮血肿;低钾血症	治愈	毛方敏	毛方敏	万峻莱	腰椎骨折切开复位内固定术;腹腔镜小肠裂伤修补术;腹腔冲洗检查
14952	O211脊柱外科	2025-07-18	2025-07-30	3527205	胡立尧	1	63Y	颈部脊髓损伤	颈椎间盘创伤性破裂;肌腱和肌肉损伤;胸椎骨折;腰椎骨折;眼睑裂伤;眶骨骨折;头皮擦伤;肺挫伤;颈椎间盘突出;骨折术后;尿道狭窄;矽肺;泪小管断裂	好转	林焱	林焱	许聪	前入路颈椎融合术;2-3个椎骨融合或再融合;金属脊椎融合物置入术;黄韧带部分切除术;颈椎间盘切除伴椎管减压术
14953	O211脊柱外科	2025-07-17	2025-07-30	3527262	陈益俊	1	16Y	颈部脊髓损伤	颈椎骨折;不完全性瘫痪	好转	林焱	林焱	许聪	前入路颈椎融合术;2-3个椎骨融合或再融合;金属脊椎融合物置入术;黄韧带部分切除术;颈椎间盘切除伴椎管减压术
14954	O211脊柱外科	2025-07-23	2025-07-31	3527637	林苍	1	34Y	腰椎骨折	躯干韧带损伤;腰椎间盘突出;脂肪肝;胆囊息肉;前列腺结石	治愈	林仲可	林仲可	林仲可	腰椎骨折切开复位内固定术
14955	O211脊柱外科	2025-07-26	2025-07-31	3527786	阮玉英	2	67Y	骨质疏松伴有病理性骨折，其他的	胸椎骨折;脊柱肿瘤;高血压;肝硬化;胆囊结石;后天性肾囊肿;脾大	好转	王向阳	盛孙仁	朱思品	胸椎骨折球囊扩张成形术;脊柱关节活组织检查
14956	O211脊柱外科	2025-07-21	2025-08-01	3527933	李中丘	1	51Y	颈部脊髓损伤	颈椎滑脱;颈椎骨折;颈椎间盘突出;多处开放性伤口;颈椎退行性病变;骨质增生	好转	王向阳	盛孙仁	朱思品	前入路颈椎融合术;颈椎植骨术;2-3个椎骨融合或再融合;金属脊椎融合物置入术;颈椎间盘切除术
14957	O211脊柱外科	2025-07-23	2025-08-03	3528545	胡定福	1	62Y	多发性腰椎骨折	胸椎骨折	治愈	王向阳	盛孙仁	朱思品	腰椎骨折切开复位内固定术;腰椎椎板切除减压术;腰椎植骨术
14958	O211脊柱外科	2025-07-31	2025-08-05	3529309	芦炳顺	2	63Y	骨质疏松伴有病理性骨折，其他的	腰椎压缩性骨折;老年性心脏瓣膜病;肝囊肿	治愈	林仲可	王胜	王胜	腰椎骨折球囊扩张成形术;椎骨活组织检查
14959	O211脊柱外科	2025-07-24	2025-08-05	3529311	张永录	1	50Y	腰椎压缩性骨折	腰椎间盘突出;腰椎退行性病变;前列腺增生	好转	林焱	许聪	许聪	腰椎骨折切开复位内固定术
14960	O211脊柱外科	2025-08-01	2025-08-05	3529354	刘正垟	1	64Y	胸椎骨折	腰椎退行性病变;骨质增生	治愈	王向阳	盛孙仁	朱思品	胸椎骨折球囊扩张成形术
14961	O211脊柱外科	2025-07-31	2025-08-05	3529376	陈德珍	1	80Y	骨质疏松伴有病理性骨折	腰椎术后;高血压;2型糖尿病;腰椎退行性病变;腰椎椎管狭窄;后天性肾囊肿;肾结石	好转	林仲可	王胜	王胜
14962	O211脊柱外科	2025-07-28	2025-08-05	3529381	胡阿秀	2	56Y	取除骨折内固定装置	2型糖尿病;脂肪肝;胆囊结石;后天性肾囊肿;肾结石	其他	林焱	林焱	许聪	脊柱内固定装置去除术
14963	O211脊柱外科	2025-07-20	2025-08-05	3529396	尤良正	1	79Y	第二颈椎骨折	寰椎骨折;额骨骨折;足骨折;下肢深静脉血栓形成;下肢静脉肌间血栓形成;头部的损伤;开放性脑挫伤;脑萎缩;肺部感染;颈椎退行性病变;老年性心脏瓣膜病;脂肪肝;后天性肾囊肿;前列腺增生;前列腺结石;主动脉钙化;心功能不全;主动脉瓣钙化	治愈	林仲可	林仲可	林仲可	颈后入路寰枢椎复位内固定术;颈椎植骨术
14964	O211脊柱外科	2025-07-23	2025-08-06	3529774	叶炳兴	1	63Y	腰椎间盘突出	腰椎骨折;颈椎病	治愈	毛方敏	毛方敏	万峻莱	经椎间孔入路腰椎体融合术;金属脊椎融合物置入术;2-3个椎骨融合或再融合;腰椎植骨术;腰椎间盘切除伴椎管减压术;腰椎骨折球囊扩张成形术
14965	O211脊柱外科	2025-07-31	2025-08-06	3529805	陈阿凤	2	92Y	腰椎骨折L3	陈旧性腰椎骨折;骨质疏松;肝回声不均	治愈	毛方敏	毛方敏	万峻莱	腰椎骨折球囊扩张成形术
14966	O211脊柱外科	2025-07-31	2025-08-07	3529768	张华燕	2	68Y	胸椎骨折	骨质疏松;桡骨远端骨折;脂肪肝;老年性脑萎缩;2型糖尿病;髋关节置换术后	好转	林焱	许聪	许聪	桡骨骨折闭合性复位术;石膏绷带固定;胸椎骨折球囊扩张成形术
14967	O211脊柱外科	2025-08-03	2025-08-07	3530071	徐士岳	1	72Y	颈部脊髓损伤	颈椎骨折;高血压;肝囊肿;前列腺增生;前列腺结石	好转	毛方敏	毛方敏	万峻莱
14968	O211脊柱外科	2025-07-28	2025-08-08	3530598	陈银凤	2	61Y	腰椎椎管狭窄	腰椎间盘突出;腰椎压缩性骨折;脊柱侧弯;脂肪肝;胆囊结石;肝囊肿	好转	林焱	林焱	许聪	腰椎椎体间融合术，后入路;腰椎间盘髓核切除伴椎板切除术;2-3个椎骨融合或再融合;金属脊椎融合物置入术;脊髓神经根粘连松解术;黄韧带部分切除术
14969	O211脊柱外科	2025-08-02	2025-08-10	3531079	张启信	1	72Y	腰椎压缩性骨折	胸椎压缩性骨折;骨质疏松;腰椎间盘突出;肋骨多处骨折;心包积液;高血压2级;后天性肾囊肿	好转	林焱	许聪	许聪	腰椎骨折球囊扩张成形术
14970	O211脊柱外科	2025-08-03	2025-08-10	3531082	朱爱如	2	58Y	腰椎骨折L1	腰椎间盘突出;陈旧性胸椎骨折	治愈	毛方敏	毛方敏	万峻莱	腰椎骨折球囊扩张成形术
14971	O211脊柱外科	2025-07-26	2025-08-10	3531084	章华腊	1	57Y	胸椎骨折	腰椎骨折;头皮血肿;创伤性胸腔积液;颈椎间盘突出;脂肪肝;胆囊结石;前列腺结石;前列腺增生	治愈	毛方敏	毛方敏	万峻莱	胸椎骨折切开复位内固定术;腰椎骨折切开复位内固定术
14972	O211脊柱外科	2025-08-04	2025-08-10	3531137	陈黄云	2	69Y	骨质疏松伴有病理性骨折，其他的	腰椎压缩性骨折;2型糖尿病;腰椎退行性病变;腰椎间盘突出;胸椎术后	好转	王胜	王胜	王胜	腰椎骨折球囊扩张成形术;椎骨活组织检查
14973	O211脊柱外科	2025-08-07	2025-08-10	3531160	甘万青	2	71Y	胸椎骨折	骨质疏松;骨折术后	治愈	王向阳	盛孙仁	朱思品	胸椎骨折球囊扩张成形术;椎骨活组织检查
14974	O211脊柱外科	2025-07-29	2025-08-10	3531170	蔡阿青	2	52Y	腰椎骨折	骨质疏松	治愈	王向阳	盛孙仁	朱思品	腰椎骨折切开复位内固定术;椎弓根钉内固定术
14975	O211脊柱外科	2025-07-27	2025-08-11	3531589	林新义	1	49Y	胸椎骨折	强直性脊柱炎;椎体感染;食管裂孔疝;高血压;肺肿物;特发性肺纤维化;脂肪肝;后天性肾囊肿;前列腺结石	治愈	林仲可	林仲可	林仲可	胸椎骨折切开复位内固定术
14976	O211脊柱外科	2025-07-25	2025-08-11	3531627	苏畅	2	43Y	颈椎骨折	颈椎脱位C6/C7;腰椎骨折L1;骶骨骨折	治愈	王向阳	盛孙仁	朱思品	前入路颈椎融合术;颅骨牵引术;颈椎间盘切除术;金属脊椎融合物置入术;2-3个椎骨融合或再融合;颈椎骨折切开复位内固定术;颈椎植骨术
14977	O211脊柱外科	2025-08-04	2025-08-12	3531168	夏碎英	2	75Y	胸椎压缩性骨折	骨质疏松，其他的;陈旧性腰椎骨折;脊椎退行性病变;腰椎间盘突出;足软组织感染;2型糖尿病;主动脉瓣疾患，其他的;下肢动脉粥样硬化;老年性脑萎缩;心功能不全	治愈	林仲可	王胜	王胜	胸椎骨折球囊扩张成形术;椎骨活组织检查
14978	O211脊柱外科	2025-08-04	2025-08-12	3532011	陈长海	1	54Y	取除骨折内固定装置	后天性肾囊肿	其他	林焱	林焱	许聪	脊柱内固定装置去除术
14979	O211脊柱外科	2025-08-04	2025-08-13	3532423	钱希奶	1	56Y	腰椎骨折	半月板撕裂，近期的;肝囊肿;肾结石;膝关节积液;多处挫伤;肝囊肿;结肠憩室;盲肠憩室	好转	林焱	林焱	许聪	腰椎骨折切开复位内固定术
14980	O211脊柱外科	2025-08-08	2025-08-13	3532424	曹寿滔	1	81Y	腰椎压缩性骨折	腰椎间盘突出;腰椎椎管狭窄;骨质疏松;陈旧性胸椎骨折;颈椎间盘突出	治愈	林焱	林焱	许聪	腰椎骨折球囊扩张成形术
14981	O211脊柱外科	2025-08-09	2025-08-14	3532813	王余花	2	79Y	骨质疏松伴有病理性骨折，其他的	胸椎骨折;高血压	好转	王向阳	盛孙仁	朱思品	胸椎骨折球囊扩张成形术
14982	O211脊柱外科	2025-08-03	2025-08-14	3532894	李金勇	1	33Y	截瘫	腰椎骨折	好转	毛方敏	毛方敏	万峻莱	腰椎椎体间融合术，后入路;腰椎骨折切开复位内固定术;2-3个椎骨融合或再融合;金属脊椎融合物置入术;腰椎植骨术;腰椎间盘切除伴椎管减压术
14983	O211脊柱外科	2025-08-05	2025-08-14	3532917	叶帮傲	1	76Y	胸椎骨折	脊髓损伤;胸椎椎管狭窄;胸椎脱位T10/T11;皮肤裂伤;颈椎术后	治愈	王向阳	盛孙仁	朱思品	椎弓根钉内固定术;胸椎骨折切开复位内固定术;胸椎椎板切除减压术;胸椎植骨术;胸椎融合术，后入路;2-3个椎骨融合或再融合
14984	O211脊柱外科	2025-08-11	2025-08-14	3533082	聂军	2	65Y	腰椎骨折	腰椎椎管狭窄;颈椎退行性病变;颈椎间盘突出;下肢深静脉血栓形成;宫颈恶性肿瘤;子宫切除术后状态;肾盂积水，其他的;输尿管扩张;下肢静脉肌间血栓形成	未愈	王向阳	盛孙仁	朱思品	下肢静脉造影
14985	O211脊柱外科	2025-08-10	2025-08-15	3533245	李月萍	2	61Y	腰椎压缩性骨折	陈旧性胸椎骨折;骨质疏松	好转	林焱	林焱	许聪	腰椎骨折球囊扩张成形术
14986	O211脊柱外科	2025-08-09	2025-08-15	3533284	吴月嫦	2	58Y	胸椎骨折	骨质疏松	好转	林焱	林焱	许聪	胸椎骨折球囊扩张成形术
14987	O211脊柱外科	2025-08-07	2025-08-17	3533910	王玉英	2	51Y	取除骨折内固定装置		其他	毛方敏	毛方敏	万峻莱	脊柱内固定装置去除术
14988	O211脊柱外科	2025-08-03	2025-08-17	3533929	贾东华	1	51Y	颈椎骨折	肺肿物;脂肪肝	治愈	毛方敏	毛方敏	万峻莱	前入路颈椎融合术;颈椎前路椎管减压术;颈椎骨折切开复位内固定术;颈椎植骨术;颈椎间盘切除术
14989	O211脊柱外科	2025-08-12	2025-08-18	3534353	张爱英	2	64Y	骨质疏松伴有病理性骨折，其他的	胸椎骨折T11/T12;脊柱后凸;脊椎退行性病变;心功能不全;特发性肺纤维化;脊柱侧弯;胸椎间盘变性;腰椎前移	好转	林仲可	王胜	王胜	胸椎骨折切开复位内固定术;经皮椎骨成形术;腰椎植骨术
14990	O211脊柱外科	2025-08-12	2025-08-18	3534604	陈启英	2	85Y	颈椎骨折	骨质疏松;下肢静脉肌间血栓形成;冠状动脉粥样硬化性心脏病;心房颤动;心力衰竭;肺动脉高压中度;肝血管瘤;肾错构瘤;胆囊结石;低钾血症	好转	毛方敏	万峻莱	万峻莱
14991	O211脊柱外科	2025-08-07	2025-08-19	3534762	方玉云	1	58Y	颈部脊髓损伤	创伤性颈椎间盘破裂;颈椎滑脱;颈椎骨折;跖骨骨折;跖趾关节脱位;高血压;颈椎退行性病变;前列腺结石;老年性心脏瓣膜病	好转	林仲可	林仲可	林仲可	前入路颈椎融合术;颅骨牵引术;椎体次全切除伴椎间盘切除术;金属脊椎融合物置入术;2-3个椎骨融合或再融合;颈椎植骨术
14992	O211脊柱外科	2025-08-03	2025-08-20	3529543	张国来	1	87Y	颈椎病	颈椎退行性病变;陈旧性胸椎骨折;胸椎退行性病变;肺恶性肿瘤;心功能不全;脑缺血灶;筛窦炎;后天性肾囊肿;慢性膀胱炎，其他的;前列腺增生;前列腺结石;肺大疱;主动脉钙化;肺术后;二尖瓣和主动脉瓣的疾患;心功能不全	治愈	林仲可	林仲可	林仲可	颈椎后路单开门椎管减压术;椎骨成形术
14993	O211脊柱外科	2025-08-11	2025-08-20	3535202	钱乐林	1	47Y	胸椎压缩性骨折	胸椎退行性病变;前列腺结石	治愈	林焱	林焱	许聪	胸椎骨折切开复位内固定术
14994	O211脊柱外科	2025-08-12	2025-08-20	3535212	徐彩女	2	61Y	腰椎骨折L2	骨质疏松;椎管内囊肿	好转	林焱	林焱	许聪	腰椎骨折球囊扩张成形术
14995	O211脊柱外科	2025-08-10	2025-08-20	3535236	陈贤东	1	79Y	颈椎椎管狭窄	颈椎间盘突出;后天性肾囊肿;第二颈椎骨折;颈椎骨折C3	治愈	林焱	林焱	许聪	前入路颈椎融合术;颈椎间盘切除术;金属脊椎融合物置入术;2-3个椎骨融合或再融合;颈椎植骨术
14996	O211脊柱外科	2025-08-12	2025-08-20	3535238	王贤云	1	51Y	腰椎骨折	骨质疏松;支气管哮喘(部分控制)	治愈	毛方敏	毛方敏	万峻莱	腰椎骨折球囊扩张成形术
14997	O211脊柱外科	2025-08-14	2025-08-22	3536078	吴爱花	2	54Y	取除骨折内固定装置		其他	毛方敏	毛方敏	万峻莱	脊柱内固定装置去除术
14998	O211脊柱外科	2025-08-12	2025-08-22	3536081	李增东	1	65Y	腰椎压缩性骨折	腰椎椎管狭窄;肌腱和肌肉损伤;慢性失血性贫血;脊椎退行性病变;肺肿物;炎症后肺纤维化;主动脉钙化;脂肪肝;肾术后;后天性肾囊肿;腰椎间盘突出	治愈	林仲可	王胜	王胜	腰椎骨折切开复位内固定术
14999	O211脊柱外科	2025-08-19	2025-08-23	3536351	戴亦乐	1	28Y	胸椎骨折	肺肿物;肺挫伤;创伤性胸腔积液;丙型肝炎病毒携带者	好转	林仲可	林仲可	林仲可
15000	O211脊柱外科	2025-08-20	2025-08-24	3536706	陈爱霞	2	75Y	腰椎骨折	腰椎间盘突出;骨折术后;骨质疏松;脂肪肝;肾结石;后天性肾囊肿	好转	林焱	许聪	许聪	腰椎骨折球囊扩张成形术
15001	O211脊柱外科	2025-08-22	2025-08-24	3536730	林金生	1	74Y	胸椎骨折	骨质疏松;腰椎退行性病变;腰椎间盘突出;腰椎前移	治愈	林仲可	林仲可	林仲可	胸椎骨折球囊扩张成形术
15002	O211脊柱外科	2025-08-20	2025-08-24	3536741	黄阿雪	2	91Y	腰椎骨折L1	骨质疏松伴有病理性骨折;腰椎椎管狭窄;低钾血症;陈旧性胸椎骨折;脊椎退行性病变;老年性心脏瓣膜病;肝回声不均;后天性肾囊肿;肾结石;腰椎间盘突出;腰椎椎管狭窄;主动脉瓣疾患，其他的	治愈	林仲可	王胜	王胜	腰椎骨折球囊扩张成形术
15003	O211脊柱外科	2025-08-14	2025-08-24	3536850	王烈群	1	51Y	取除骨折内固定装置		其他	王向阳	盛孙仁	朱思品	脊柱内固定装置去除术;跟骨内固定物取出术
15004	O211脊柱外科	2025-08-11	2025-08-25	3537095	卢翠林	2	63Y	腰椎骨折	骨质疏松;腰椎间盘突出;高血压;糖尿病不伴有并发症;手术后状态，其他特指的;脂肪肝	治愈	毛方敏	毛方敏	万峻莱	腰椎骨折切开复位内固定术
15005	O211脊柱外科	2025-08-21	2025-08-25	3537132	陈仕洪	1	46Y	腰椎间盘突出	腰椎退行性病变;陈旧性胸椎骨折;主动脉瓣疾患，其他的;肺大疱;心功能不全;胸椎退行性病变	治愈	林仲可	林仲可	林仲可	内镜下腰椎髓核切除术;经皮椎间盘电热纤维环成形术(IDET);脊髓神经根粘连松解术;黄韧带部分切除术
15006	O211脊柱外科	2025-08-15	2025-08-26	3537484	张国华	1	82Y	第一颈椎骨折	颈椎不稳定;第二颈椎骨折;颈椎间盘突出;颈椎退行性病变	好转	王向阳	盛孙仁	朱思品	颈后入路寰枢椎复位内固定术;寰-枢脊柱融合;颈椎植骨术;椎弓根钉内固定术;颈椎骨折切开复位内固定术
15007	O211脊柱外科	2025-08-18	2025-08-26	3537493	黄玉莲	2	83Y	骨质疏松伴有病理性骨折，其他的	胸椎骨折;陈旧性腰椎骨折;脂肪肝;胆囊结石;静脉疾患;高血压;糖尿病不伴有并发症;下肢动脉粥样硬化	好转	毛方敏	毛方敏	万峻莱	胸椎骨折球囊扩张成形术
15008	O211脊柱外科	2025-08-14	2025-08-26	3537718	薛云奶	2	80Y	腰椎椎管狭窄	腰椎间盘突出;腰椎骨折;陈旧性胸椎骨折;手术后状态，其他特指的;骨质疏松;脂肪肝;睡眠障碍;焦虑状态	好转	林焱	林焱	许聪	2-3个椎骨融合或再融合;腰椎间盘切除伴椎板切除术;腰椎椎体间融合术，后入路;腰椎骨折切开复位内固定术;黄韧带部分切除术;脊髓神经根粘连松解术
15009	O211脊柱外科	2025-08-22	2025-08-28	3538375	项李凤	2	72Y	骨质疏松伴有病理性骨折	胸椎压缩性骨折;腰椎压缩性骨折;肺恶性肿瘤;肺\[部分\]后天性缺失;胆囊结石;高血压	好转	林焱	许聪	许聪	腰椎骨折球囊扩张成形术;胸椎骨折球囊扩张成形术
15010	O211脊柱外科	2025-08-24	2025-08-28	3538400	沈益善	2	78Y	骨质疏松伴有病理性骨折，其他的	腰椎骨折L1;腰椎前移;腰椎间盘突出;高血压;主动脉钙化;下肢动脉粥样硬化	好转	毛方敏	毛方敏	万峻莱	腰椎骨折球囊扩张成形术
15011	O211脊柱外科	2025-08-17	2025-08-28	3538404	陈玲妹	2	55Y	腰椎前移	腰椎椎管狭窄;陈旧性腰椎骨折;高血压;肺炎;胸腔积液;肝囊肿;腰椎间盘变性;椎间盘膨隆	好转	林焱	许聪	许聪	腰椎椎体间融合术，后入路;腰椎间盘切除伴椎板切除术;2-3个椎骨融合或再融合;金属脊椎融合物置入术;脊髓神经根粘连松解术;黄韧带部分切除术
15012	O211脊柱外科	2025-08-21	2025-08-29	3538825	王理花	2	71Y	胸椎多处骨折	腰椎骨折L1;脊柱血管瘤;重度骨质疏松	好转	林焱	许聪	许聪	胸椎骨折切开复位内固定术;腰椎骨折球囊扩张成形术
15013	O211脊柱外科	2025-08-19	2025-08-29	3538853	郑南英	2	67Y	取除骨折内固定装置	腰椎退行性病变	其他	林焱	许聪	许聪	脊柱内固定装置去除术
15014	O211脊柱外科	2025-08-25	2025-08-30	3539141	赖素兰	2	70Y	骨质疏松伴有病理性骨折，其他的	胸椎骨折;脊椎退行性病变;腰椎间盘突出;肺肿物;主动脉弓钙化;创伤性胸腔积液;老年性心脏瓣膜病;脂肪肝;胆囊结石;后天性肾囊肿;肾结石;下肢动脉粥样硬化;肾钙化	好转	林仲可	林仲可	林仲可	胸椎骨折球囊扩张成形术;椎骨活组织检查
15015	O211脊柱外科	2025-08-22	2025-08-31	3539463	吴汝龙	1	65Y	胸椎骨折	脊髓损伤;胸椎椎管狭窄;截瘫	治愈	王向阳	盛孙仁	朱思品	胸椎骨折切开复位内固定术;椎弓根钉内固定术;胸椎植骨术;胸椎椎板切除减压术
15016	O211脊柱外科	2025-08-17	2024-09-01	3539918	厉晓海	1	43Y	取除骨折内固定装置	陈旧性胸椎骨折;肺气肿;肝囊肿;前列腺结石	其他	王向阳	盛孙仁	盛孙仁	脊柱内固定装置去除术
15017	O211脊柱外科	2025-08-29	2024-09-01	3540040	王绒碎	2	50Y	胸椎骨折	耻骨骨折;胸椎退行性病变;多发性肝囊肿;胆囊息肉;腰椎间盘变性;腰椎间盘突出	好转	林仲可	林仲可	林仲可
15018	O211脊柱外科	2025-08-20	2024-09-01	3540089	包凤兰	2	64Y	脊髓型颈椎病	颈椎间盘突出;宫颈术后;腰椎骨折;脂肪肝;宫颈恶性肿瘤个人史;颈部脊髓损伤	治愈	盛孙仁	王向阳	盛孙仁	前入路颈椎融合术;颈椎间盘切除术;金属脊椎融合物置入术;2-3个椎骨融合或再融合;颈椎植骨术
15019	O211脊柱外科	2025-08-20	2024-09-02	3540297	任阿进	1	25Y	枢椎齿状突骨折	皮肤裂伤;多处开放性伤口;颈椎间盘突出;肾结石;头皮裂伤	治愈	盛孙仁	王向阳	盛孙仁	颈椎骨折切开复位内固定术;后入路颈椎融合术;颈椎植骨术;2-3个椎骨融合或再融合
15020	O211脊柱外科	2025-08-28	2024-09-02	3540317	张红香	2	73Y	腰椎压缩性骨折	胸椎压缩性骨折;骨质疏松伴有病理性骨折，其他的;腰椎前移;胸椎退行性病变;人工膝关节;肺肿物;二尖瓣和主动脉瓣的疾患;胆囊结石;肾盂积水，其他的;腰椎退行性病变;心功能不全	治愈	武垚森	王胜	王胜	腰椎骨折球囊扩张成形术;胸椎骨折球囊扩张成形术;椎骨活组织检查
15021	O211脊柱外科	2025-08-28	2024-09-03	3540669	刘彩绿	2	59Y	腰椎骨折	骨质疏松;脊椎退行性病变;胆囊息肉;创伤性胸腔积液	好转	林焱	许聪	许聪	腰椎骨折球囊扩张成形术
15022	O211脊柱外科	2025-08-25	2024-09-03	3540695	胡美翠	2	86Y	骨质疏松伴有病理性骨折，其他的	下肢静脉肌间血栓形成;脑梗死后遗症;胸椎骨折	好转	武垚森	王胜	王胜	胸椎骨折球囊扩张成形术
15023	O211脊柱外科	2025-08-28	2024-09-03	3540709	胡金兰	2	68Y	腰椎骨折L3	骨质疏松;特发性(原发性)高血压;糖尿病;胸椎黄韧带骨化;脊椎退行性病变;腰椎峡部裂;腰椎前移;椎间盘膨隆;腰椎间盘突出;老年性心脏瓣膜病;脂肪肝;肝囊肿	治愈	武垚森	王胜	武垚森	腰椎骨折球囊扩张成形术;椎骨活组织检查
15024	O211脊柱外科	2024-09-03	2024-09-03	3540850	池万金	1	63Y	骨质疏松伴有病理性骨折	酒精依赖综合征;陈旧性腰椎骨折	好转	武垚森	王胜	王胜
15025	O211脊柱外科	2025-08-26	2024-09-04	3541059	叶雪怀	1	44Y	腰椎骨折	胸椎棘突骨折;脊椎退行性病变;陈旧性肋骨骨折;脂肪肝;前列腺结石	治愈	林仲可	林仲可	林仲可	腰椎骨折切开复位内固定术
15026	O211脊柱外科	2025-08-31	2024-09-05	3541434	林兰姜	2	64Y	腰椎椎管狭窄	重度骨质疏松;陈旧性胸椎骨折;陈旧性腰椎骨折	治愈	武垚森	武垚森	武垚森	内镜下腰椎髓核切除术;经皮椎间盘电热纤维环成形术(IDET);脊髓神经根粘连松解术;脊髓神经根射频消融术;腰椎间盘造影;黄韧带部分切除术;椎间盘镜下椎管减压术
15027	O211脊柱外科	2024-09-01	2024-09-06	3541632	余忆旋	2	91Y	骨质疏松伴有病理性骨折，其他的	腰椎骨折L1;骨折术后;髋关节置换术后;肝囊肿;后天性肾囊肿;肾结石;心包积液	好转	毛方敏	毛方敏	周凯亮	腰椎骨折球囊扩张成形术;椎骨活组织检查
15028	O211脊柱外科	2024-09-01	2024-09-07	3541927	冯三琴	2	63Y	腰椎骨折	肺肿物;胆囊胆固醇沉着症;肾结石;下肢动脉粥样硬化	治愈	林仲可	林仲可	林仲可	腰椎骨折球囊扩张成形术;椎骨活组织检查
15029	O211脊柱外科	2024-09-02	2024-09-07	3541932	夏月柳	2	72Y	胸椎压缩性骨折	腰椎骨折L1;腰椎间盘突出;高血压;糖尿病不伴有并发症;下肢动脉粥样硬化;脂肪肝;肝囊肿;后天性肾囊肿	治愈	盛孙仁	盛孙仁	盛孙仁	胸椎骨折球囊扩张成形术;腰椎骨折球囊扩张成形术
15030	O211脊柱外科	2025-08-27	2024-09-09	3542685	林素芽	2	63Y	第二颈椎骨折	掌骨骨折;颈椎间盘突出;颈椎退行性病变;脂肪肝;肝囊肿;肝回声不均;手术后状态，其他特指的	治愈	毛方敏	毛方敏	周凯亮	颈椎骨折切开复位内固定术
15031	O211脊柱外科	2025-08-24	2024-09-09	3542776	胡万梅	2	44Y	多发性腰椎骨折	胸椎骨折;腰椎间盘突出;耻骨骨折;肋骨骨折;肩胛骨骨折;髋臼骨折;骶骨骨折	治愈	王向阳	盛孙仁	盛孙仁	腰椎骨折切开复位内固定术;胸椎骨折切开复位内固定术
15032	O211脊柱外科	2025-08-28	2024-09-09	3542781	周挺挺	1	24Y	腰椎骨折	肺肿物;脂肪肝	好转	林焱	许聪	许聪	腰椎骨折切开复位内固定术
15033	O211脊柱外科	2024-09-05	2024-09-09	3542896	蔡贻林	1	69Y	寰椎骨折	枢椎齿状突骨折;胸椎多处骨折;颈椎间盘突出;半月板撕裂，近期的;主动脉瓣关闭不全;膝的其他和未特指部位的扭伤和劳损;三尖瓣关闭不全;轻度肺动脉高压;原发性单侧膝关节病;膝关节外侧副韧带损伤;膝关节滑膜炎;膝关节积液;高血压	好转	王向阳	盛孙仁	盛孙仁
15034	O211脊柱外科	2024-09-04	2024-09-10	3543098	翁寿香	2	68Y	胸椎骨折T5/T6	骨质疏松;胸椎退行性病变;腰椎退行性病变	治愈	毛方敏	毛方敏	周凯亮	胸椎骨折球囊扩张成形术
15035	O211脊柱外科	2024-09-02	2024-09-11	3543488	陈修才	1	50Y	腰椎骨折L3	后天性肾囊肿;肾结石;前列腺结石	治愈	毛方敏	毛方敏	周凯亮	腰椎骨折切开复位内固定术
15036	O211脊柱外科	2024-09-01	2024-09-11	3543489	范定飞	2	61Y	腰椎骨折	腰椎间盘突出;高血压;抑郁状态;骨质疏松;脂肪肝	好转	林焱	许聪	许聪	腰椎骨折球囊扩张成形术
15037	O211脊柱外科	2025-08-28	2024-09-11	3543623	苏彩极	1	71Y	腰椎间盘突出	腰椎椎管狭窄;腰椎退行性病变;下肢动脉粥样硬化;骨折术后	治愈	毛方敏	毛方敏	周凯亮	经椎间孔入路腰椎体融合术;腰椎间盘切除伴椎管减压术;金属脊椎融合物置入术;2-3个椎骨融合或再融合;脊髓神经根粘连松解术;黄韧带部分切除术;腰椎植骨术
15038	O211脊柱外科	2024-09-02	2024-09-12	3544021	李文胜	1	38Y	胸椎骨折T11/T12	胸椎椎管狭窄;高血压	治愈	盛孙仁	盛孙仁	盛孙仁	胸椎骨折切开复位内固定术;胸椎植骨术
15039	O211脊柱外科	2024-09-01	2024-09-13	3544277	郑清鹏	1	49Y	颈椎多处骨折	颈部脊髓损伤;颈椎脱位C5/C6;脊椎半切综合征;强直性脊柱炎	治愈	王向阳	盛孙仁	盛孙仁	颈椎植骨术;颈椎骨折切开复位内固定术;颈椎脱位切开复位术
15040	O211脊柱外科	2024-09-06	2024-09-14	3544509	谢红英	2	68Y	腰椎骨折L1	骨质疏松;腰椎椎管狭窄;腰椎间盘突出;后天性肾囊肿	治愈	王向阳	盛孙仁	盛孙仁	腰椎骨折切开复位内固定术;经皮椎骨成形术
15041	O211脊柱外科	2024-09-06	2024-09-14	3544578	石笑微	2	75Y	腰椎骨折L3	陈旧性腰椎骨折;陈旧性胸椎骨折	治愈	毛方敏	毛方敏	周凯亮	腰椎骨折球囊扩张成形术;椎骨活组织检查
15042	O211脊柱外科	2024-09-02	2024-09-15	3544912	陈永棉	1	71Y	颈部脊髓损伤	颈椎间盘突出;肋骨多处骨折;脂肪肝;单纯性肾囊肿	好转	毛方敏	毛方敏	周凯亮	前入路颈椎融合术;金属脊椎融合物置入术;2-3个椎骨融合或再融合;椎体次全切除伴椎间盘切除术;颈椎植骨术
15043	O211脊柱外科	2024-09-05	2024-09-15	3544921	周涤初	1	70Y	腰椎骨折	特发性(原发性)高血压;糖尿病不伴有并发症;脂肪肝;后天性肾囊肿;心包积液;胸腔积液	好转	林焱	许聪	许聪	腰椎骨折切开复位内固定术
15044	O211脊柱外科	2024-09-05	2024-09-15	3544923	涂永花	2	75Y	胸椎骨折	骨质疏松;胸腰椎椎管狭窄;腰椎间盘突出;脊椎退行性病变;腔隙性脑梗死;抑郁状态;老年性心脏瓣膜病;脂肪肝;脾肿物;肺钙化;间质性肺病;主动脉钙化;后天性肾囊肿;子宫多发性平滑肌瘤;下肢动脉粥样硬化	治愈	武垚森	武垚森	武垚森	胸椎骨折球囊扩张成形术
15045	O211脊柱外科	2024-09-06	2024-09-16	3545465	向多秀	2	55Y	胸椎多处骨折	胸椎椎管狭窄;肋骨多处骨折;创伤性胸腔积液;椎管内蛛网膜囊肿;腰椎间盘突出;颈椎间盘突出;胆囊息肉	好转	林焱	许聪	许聪	胸椎骨折切开复位内固定术
15046	O211脊柱外科	2024-09-06	2024-09-16	3545536	吴雯锦	2	14Y	腰椎骨折L2	腰椎椎管狭窄;跟骨骨折	治愈	王向阳	盛孙仁	盛孙仁	腰椎骨折切开复位内固定术;椎管减压术
15047	O211脊柱外科	2024-09-04	2024-09-17	3545826	林春香	2	67Y	腰椎间盘突出	腰椎椎管狭窄;腰椎前移;颈椎术后;陈旧性腰椎骨折;肺肿物;脂肪肝	好转	林焱	许聪	许聪	腰椎椎体间融合术，后入路;腰椎间盘髓核切除伴椎板切除术;2-3个椎骨融合或再融合;脊髓神经根粘连松解术;黄韧带部分切除术;金属脊椎融合物置入术
15048	O211脊柱外科	2025-08-13	2024-09-18	3546059	薛少凯	1	38Y	寰枢椎脱位	枢椎齿状突骨折;肺肿物;脊柱侧弯	治愈	王向阳	盛孙仁	盛孙仁	颈椎脱位切开复位内固定术;髂骨切除术用作移植物;2-3个椎骨融合或再融合;寰-枢椎融合术，后入路
15049	O211脊柱外科	2024-09-10	2024-09-18	3546087	曾永武	1	49Y	取除骨折内固定装置	脂肪肝;后天性肾囊肿	其他	武垚森	武垚森	武垚森	脊柱内固定装置去除术
15050	O211脊柱外科	2024-09-03	2024-09-18	3546197	罗关成	1	49Y	腰椎骨折L2	腰骶棘突骨折	好转	林焱	许聪	许聪	腰椎骨折切开复位内固定术
15051	O211脊柱外科	2024-09-13	2024-09-18	3546205	乐小英	2	55Y	胸椎骨折	骨质疏松;手术后状态，其他特指的	好转	林焱	许聪	许聪	胸椎骨折切开复位内固定术
15052	O211脊柱外科	2024-09-11	2024-09-18	3546209	谷定顺	1	57Y	胸椎骨折	桡骨远端骨折;腰椎间盘突出;间质性肺炎;肋骨骨折	治愈	林焱	许聪	许聪	胸椎骨折球囊扩张成形术
15053	O211脊柱外科	2024-09-15	2024-09-18	3546224	季柱梅	2	83Y	胸椎骨折	腰椎骨折;骨质疏松;冠状动脉粥样硬化性心脏病;心室壁瘤;冠状动脉支架植入后状态;特发性(原发性)高血压;肋骨骨折;腰椎退行性病变;腰椎间盘突出;后天性肾囊肿;下肢动脉粥样硬化;下肢动脉粥样硬化闭塞症	治愈	武垚森	武垚森	武垚森	胸椎骨折球囊扩张成形术
15054	O211脊柱外科	2024-09-14	2024-09-19	3546530	叶秀英	2	81Y	腰椎压缩性骨折	陈旧性胸椎骨折;椎管内蛛网膜囊肿;高血压;糖尿病;骨质疏松;陈旧性腰椎骨折	治愈	林焱	许聪	许聪	腰椎骨折球囊扩张成形术
15055	O211脊柱外科	2024-09-14	2024-09-19	3546571	钱圣其	1	71Y	腰椎骨折	骨质疏松;腰椎间盘突出	好转	林焱	林焱	许聪	腰椎骨折球囊扩张成形术
15056	O211脊柱外科	2024-09-10	2024-09-19	3546751	钟心昵	2	19Y	胸椎骨折	多处挫伤	好转	林焱	许聪	许聪	胸椎骨折切开复位内固定术
15057	O211脊柱外科	2024-09-15	2024-09-21	3546997	王冬翠	2	70Y	骨质疏松伴有病理性骨折，其他的	腰椎前移;腰椎间盘突出;骨折术后;腰椎压缩性骨折;肝囊肿;胆囊息肉;腰椎椎管狭窄	好转	王向阳	盛孙仁	盛孙仁	腰椎骨折球囊扩张成形术;经皮椎骨成形术
15058	O211脊柱外科	2024-09-12	2024-09-21	3547181	金稚铋	1	47Y	腰椎压缩性骨折	腰椎间盘突出;胆囊结石;脂肪肝;后天性肾囊肿	治愈	林焱	许聪	许聪	腰椎骨折切开复位内固定术
15059	O211脊柱外科	2024-09-14	2024-09-22	3546991	王素琪	2	82Y	胸椎骨折	腰椎间盘突出;腰椎椎管狭窄;骨质疏松;陈旧性胸椎骨折	好转	林焱	许聪	许聪	胸椎骨折球囊扩张成形术
15060	O211脊柱外科	2024-09-07	2024-09-22	3547430	卓士刚	1	57Y	颈椎骨折	胸椎多处骨折;肌腱和肌肉损伤;颅骨多发性骨折;骨折术后;下肢静脉血栓形成;肺挫伤;肺气肿合并肺大泡;肺肿物;胆囊内胆汁淤积;肝囊肿	治愈	王向阳	盛孙仁	盛孙仁	前入路颈椎融合术;颈椎间盘切除术;颈椎植骨术;后入路颈椎融合术;颈椎植骨术;金属脊椎融合物置入术;胸椎骨折切开复位内固定术
15061	O211脊柱外科	2024-09-13	2024-09-22	3547612	李来梅	2	84Y	腰椎骨折	胸椎骨折T11/T12;骨质疏松;特发性(原发性)高血压;哮喘;脑梗死后遗症;腰背部挫伤;蛛网膜囊肿;脂肪瘤;肺肿物;肝回声不均;胆囊结石;后天性肾囊肿	治愈	武垚森	武垚森	武垚森	腰椎骨折球囊扩张成形术;胸椎骨折球囊扩张成形术
15062	O211脊柱外科	2024-09-12	2024-09-23	3547841	方陈云	2	78Y	腰椎前移	腰椎椎管狭窄;骨质疏松伴有病理性骨折;特发性(原发性)高血压;心脏扩大;主动脉瓣钙化;肾结石	治愈	武垚森	武垚森	王胜	经椎间孔入路腰椎体融合术;腰椎椎板切除减压术;金属脊椎融合物置入术;2-3个椎骨融合或再融合;脊髓神经根粘连松解术;经皮椎骨成形术;黄韧带部分切除术;腰椎植骨术
15063	O211脊柱外科	2024-09-12	2024-09-23	3547864	王子伦	1	56Y	腰椎骨折L2	高血压;后天性肾囊肿;前列腺结石	治愈	毛方敏	毛方敏	周凯亮	腰椎骨折切开复位内固定术
15064	O211脊柱外科	2024-09-12	2024-09-23	3547964	郑秀英	2	85Y	腰椎压缩性骨折	骨质疏松;肺肿物;肺气肿;肝囊肿;股骨颈骨折;肾结石;后天性肾囊肿;骨折术后;髋关节置换术后;腰椎椎管狭窄	治愈	王向阳	盛孙仁	盛孙仁	腰椎骨折球囊扩张成形术;经皮椎骨成形术
15065	O211脊柱外科	2024-09-15	2024-09-24	3546999	周林梅	2	85Y	骨质疏松伴有病理性骨折，其他的	腰椎前移;脊柱侧弯;胸椎压缩性骨折;高血压;骨折术后;胆囊结石;肾结石;后天性肾囊肿	好转	王向阳	盛孙仁	盛孙仁	胸椎骨折球囊扩张成形术;经皮椎骨成形术
15066	O211脊柱外科	2024-09-14	2024-09-24	3548274	朱陈青	2	44Y	胸椎骨折	子宫术后	治愈	王向阳	盛孙仁	盛孙仁	胸椎骨折切开复位内固定术
15067	O211脊柱外科	2024-09-14	2024-09-24	3548317	桂满华	1	49Y	取除骨折内固定装置	后天性肾囊肿;前列腺结石	其他	毛方敏	毛方敏	周凯亮	脊柱内固定装置去除术
15068	O211脊柱外科	2024-09-11	2024-09-24	3548407	夏和莲	2	45Y	胸椎骨折	肋骨多处骨折;肺肿物;腰椎椎管狭窄;腰椎间盘突出	治愈	王向阳	盛孙仁	盛孙仁	胸椎骨折切开复位内固定术;胸椎植骨术
15069	O211脊柱外科	2024-09-15	2024-09-25	3548655	钱国建	1	64Y	腰椎骨折	腰椎前移;腰椎椎管狭窄;前列腺增生;肝占位性病变	好转	林焱	许聪	许聪	腰椎骨折球囊扩张成形术;腰椎椎体间融合术，后入路;腰椎间盘切除伴椎板切除术;脊髓神经根粘连松解术;2-3个椎骨融合或再融合;黄韧带部分切除术;金属脊椎融合物置入术
15070	O211脊柱外科	2024-09-19	2024-09-25	3548657	金宗西	1	63Y	腰椎压缩性骨折	腰椎间盘突出;骨质疏松	好转	林焱	许聪	许聪	腰椎骨折球囊扩张成形术
15071	O211脊柱外科	2024-09-15	2024-09-25	3548660	吕尾珠	2	69Y	腰椎骨折	脊髓损伤;骨质疏松;头皮血肿;下肢静脉肌间血栓形成;脂肪肝;胆囊结石;主动脉弓钙化	治愈	武垚森	武垚森	王胜	腰椎骨折切开复位内固定术;腰椎椎体间融合术，后入路;黄韧带部分切除术;腰椎植骨术;腰椎椎板切除减压术
15072	O211脊柱外科	2024-09-19	2024-09-25	3548824	伍洪国	1	74Y	腰椎骨折	胸椎骨折;骨质疏松;肩胛骨骨折;肋骨多处骨折;创伤性胸腔积液;肺挫伤;高血压;脊椎退行性病变;肺肿物;纵隔肿物;主动脉钙化;马蹄形肾;肾结石;后天性肾囊肿;前列腺增生;前列腺结石;高血压	治愈	武垚森	武垚森	王胜	腰椎骨折球囊扩张成形术;胸椎骨折球囊扩张成形术
15073	O211脊柱外科	2024-09-21	2024-09-25	3548980	唐慧昌	2	87Y	骨质疏松伴有病理性骨折，其他的	腰椎压缩性骨折;特发性(原发性)高血压;坠积性肺炎;腰椎前移;胸椎退行性病变;主动脉钙化;后天性肾囊肿;肺钙化;腰椎退行性病变	好转	武垚森	武垚森	武垚森	腰椎骨折球囊扩张成形术
15074	O211脊柱外科	2024-09-14	2024-09-26	3549133	宋玉凤	2	56Y	脊柱后凸	脊柱侧弯;胸椎压缩性骨折;特发性(原发性)高血压	好转	林焱	许聪	许聪	胸椎椎体间融合术，前入路;胸椎间盘切除伴椎板切除术;脊髓神经根粘连松解术;2-3个椎骨融合或再融合;金属脊椎融合物置入术;黄韧带部分切除术
15075	O211脊柱外科	2024-09-14	2024-09-26	3549140	林爱莲	2	72Y	腰椎压缩性骨折	骨质疏松;足舟状骨骨折;骰骨骨折;腰椎间盘突出;特发性(原发性)高血压;糖尿病;楔状骨骨折(足)	好转	林焱	许聪	许聪	腰椎骨折球囊扩张成形术
15076	O211脊柱外科	2024-09-20	2024-09-26	3549209	陈晓春	1	47Y	取除骨折内固定装置	高血压;脂肪肝;后天性肾囊肿	其他	林仲可	林仲可	林仲可	脊柱内固定装置去除术
15077	O211脊柱外科	2024-09-22	2024-09-26	3549306	程金秀	2	56Y	腰椎骨折	特发性(原发性)高血压;腰椎间盘退行性病变;主动脉钙化;左室扩大	治愈	武垚森	武垚森	武垚森	腰椎骨折球囊扩张成形术
15078	O211脊柱外科	2024-09-23	2024-09-26	3549340	蔡春月	2	66Y	骨质疏松伴有病理性骨折，其他的	胸椎骨折;糖尿病;胸椎后凸;腰椎退行性病变;骨囊肿;膝关节病;脂肪肝;胆囊结石;后天性肾囊肿;肾结石;肺肿物;肺部感染;主动脉钙化;胸椎退行性病变	好转	武垚森	武垚森	武垚森
15079	O211脊柱外科	2024-09-19	2024-09-27	3549434	赵福贵	1	52Y	取除骨折内固定装置	肾结石;后天性肾囊肿;脂肪肝	其他	王向阳	盛孙仁	盛孙仁	脊柱内固定装置去除术
15080	O211脊柱外科	2024-09-23	2024-09-28	3549857	杨文兴	1	84Y	腰椎骨折	陈旧性胸椎骨折;骨质疏松;肺肿物;肺气肿;脊柱后凸;后天性肾囊肿;前列腺结石	治愈	王向阳	盛孙仁	盛孙仁	腰椎骨折球囊扩张成形术;经皮椎骨成形术
15081	O211脊柱外科	2024-09-16	2024-09-28	3549860	叶定飞	1	62Y	胸椎骨折	骨质疏松;陈旧性肺结核;肝钙化灶;腰椎骨折L3	治愈	毛方敏	毛方敏	周凯亮	胸椎骨折切开复位内固定术
15082	O211脊柱外科	2024-09-22	2024-09-29	3550156	唐利民	1	54Y	取除骨折内固定装置		其他	林焱	许聪	许聪	脊柱内固定装置去除术
15083	O211脊柱外科	2024-09-24	2024-09-29	3550185	周良娣	2	69Y	骨质疏松伴有病理性骨折，其他的	腰椎骨折;高血压;胸椎退行性病变;胸椎术后;陈旧性胸椎骨折;陈旧性腰椎骨折;单关节炎;炎症后肺纤维化;脂肪肝;腰椎退行性病变	好转	武垚森	武垚森	武垚森	腰椎骨折球囊扩张成形术
15084	O211脊柱外科	2024-09-25	2024-09-29	3550335	黄邦招	1	44Y	颈椎骨折		好转	王向阳	盛孙仁	盛孙仁
15085	O211脊柱外科	2024-09-19	2024-09-29	3550337	陈久波	1	68Y	胸椎多处骨折	多发性腰椎骨折;骨质疏松;甲状腺结节;心功能不全;前列腺结石	好转	王向阳	盛孙仁	盛孙仁
15086	O211脊柱外科	2024-09-24	2024-09-29	3550434	梅爱珠	2	66Y	胸椎骨折	脊柱血管瘤;腰椎骨折L1;腰椎前移;高血压;糖尿病;脂肪肝;骨质疏松	治愈	毛方敏	毛方敏	周凯亮	腰椎骨折球囊扩张成形术;胸椎病损切除术;胸椎骨折球囊扩张成形术
15087	O211脊柱外科	2024-09-26	2024-09-30	3551081	陈永娥	2	76Y	骨质疏松伴有病理性骨折，其他的	肝囊肿;肾结石;胸椎压缩性骨折	好转	林焱	许聪	许聪	胸椎骨折球囊扩张成形术
15088	O211脊柱外科	2024-10-01	2024-10-01	3551598	曾程知	1	72Y	腰椎骨折	骨质疏松;颈椎间盘突出;高血压;后天性肾囊肿;肾错构瘤	未愈	林仲可	林仲可	林仲可
15089	O211脊柱外科	2024-09-28	2024-10-02	3551712	郑秀花	2	61Y	胸椎骨折	骨质疏松;高血压;肝硬化;脾大;胆囊息肉;静脉疾患	治愈	王向阳	盛孙仁	盛孙仁	胸椎骨折球囊扩张成形术;经皮椎骨成形术
15090	O211脊柱外科	2024-09-25	2024-10-02	3551745	徐晓怀	2	30Y	骶骨骨折	肺肿物	治愈	毛方敏	毛方敏	周凯亮	盆骨骨折切开复位内固定术
15091	O211脊柱外科	2024-09-01	2024-10-02	3551749	吕法明	1	58Y	胸椎恶性肿瘤	病理性骨折，不可归类在他处者;肺肿物;脂肪肝;后天性肾囊肿;下肢动脉粥样硬化	好转	王向阳	盛孙仁	盛孙仁	胸椎间盘切除伴椎板切除术;椎骨活组织检查;经导管脊髓血管栓塞术;胸主动脉造影;肋间动脉造影;椎弓根钉内固定术;皮肤和皮下组织血肿抽吸术
15092	O211脊柱外科	2024-09-26	2024-10-02	3551750	吴连鸿	1	54Y	腰椎骨折L2	腰椎间盘突出;高血压;糖尿病不伴有并发症;骨折术后;脂肪肝;前列腺结石	治愈	毛方敏	毛方敏	周凯亮	腰椎骨折球囊扩张成形术
15093	O211脊柱外科	2024-09-27	2024-10-02	3551821	林上仙	1	63Y	腰椎骨折	腰椎术后;肺肿物;胆囊结石;腘窝囊肿;前列腺结石	好转	林焱	许聪	许聪	腰椎骨折球囊扩张成形术
15094	O211脊柱外科	2024-09-23	2024-10-03	3551886	李隆隆	1	24Y	取除骨折内固定装置	骨折术后	其他	毛方敏	毛方敏	周凯亮	脊柱内固定装置去除术
15095	O211脊柱外科	2024-09-25	2024-10-04	3552188	向光莲	2	40Y	取除骨折内固定装置		其他	毛方敏	毛方敏	周凯亮	脊柱内固定装置去除术
15096	O211脊柱外科	2024-09-23	2024-10-04	3552189	邵连大	1	74Y	寰枢椎脱位	颈椎椎管狭窄;颈椎病;阑尾术后;陈旧性腰椎骨折;肺肿物;肾结石;后天性肾囊肿;前列腺增生;老年性脑萎缩;前列腺结石;腔隙性脑梗死	治愈	王向阳	盛孙仁	盛孙仁	寰-枢椎融合术，后入路;颈椎脱位切开复位内固定术;颈椎病损切除术;颈椎植骨术
15097	O211脊柱外科	2024-09-28	2024-10-04	3552200	殷春仙	1	68Y	腰椎骨折	头皮裂伤;骨质疏松;陈旧性胸椎骨折;骰骨骨折	好转	林焱	许聪	许聪	腰椎骨折球囊扩张成形术
15098	O211脊柱外科	2024-09-20	2024-10-05	3552572	刘爱平	1	38Y	腰椎骨折L2	腰椎压缩性骨折;腰椎椎管狭窄;圆锥马尾综合征;脂肪肝;胆囊息肉	治愈	毛方敏	毛方敏	周凯亮	腰椎骨折切开复位内固定术
15099	O211脊柱外科	2024-09-30	2024-10-06	3552808	周雪琴	2	68Y	胸椎压缩性骨折	肾结石;脂肪肝;肝囊肿	好转	林焱	许聪	许聪	胸椎骨折球囊扩张成形术
15100	O211脊柱外科	2024-10-02	2024-10-07	3552937	金碎钗	2	70Y	胸椎压缩性骨折	骨质疏松;肝囊肿;老年性脑萎缩;陈旧性脑梗死	治愈	王向阳	盛孙仁	盛孙仁	胸椎骨折球囊扩张成形术;经皮椎骨成形术
15101	O211脊柱外科	2024-09-27	2024-10-07	3553081	毛爱飞	2	52Y	腰椎骨折	胸椎骨折;重度骨质疏松;高血压;肺肿物;肝囊肿;甲状腺术后	治愈	毛方敏	毛方敏	周凯亮	腰椎骨折球囊扩张成形术;胸椎骨折球囊扩张成形术;椎骨活组织检查
15102	O211脊柱外科	2024-09-30	2024-10-08	3553250	薛横妹	2	72Y	胸椎骨折	骨质疏松;高血压;腔隙性脑梗死;肺肿物;脂肪肝;胆囊结石	治愈	林仲可	林仲可	林仲可	胸椎骨折球囊扩张成形术;椎骨活组织检查
15103	O211脊柱外科	2024-09-27	2024-10-08	3553322	金胡兰	2	68Y	腰椎骨折L3	腰椎间盘突出;骨质疏松;小脑萎缩;脂肪肝;胆总管扩张;后天性肾囊肿;膀胱结石;肺炎	好转	林焱	许聪	许聪	腰椎骨折切开复位内固定术
15104	O211脊柱外科	2024-10-05	2024-10-08	3553331	林莲香	2	82Y	骨质疏松伴有病理性骨折，其他的	腰椎骨折L2;陈旧性胸椎骨折;陈旧性腰椎骨折;腰椎间盘突出;脊椎前移;脊椎退行性病变;脊柱侧弯;胆囊结石;脂肪肝;老年性心脏瓣膜病	好转	武垚森	武垚森	王胜	腰椎骨折球囊扩张成形术
15105	O211脊柱外科	2024-09-11	2024-10-09	3553465	梁美翠	2	73Y	颈椎病	脊髓变性;2型糖尿病;特发性(原发性)高血压;脂肪肝;老年性心脏病;甲状腺结节;老年性脑萎缩;胆囊结石;后天性肾囊肿;肾结石;肺肿物;陈旧性肋骨骨折	治愈	王向阳	盛孙仁	盛孙仁	颈椎后路单开门椎管减压术;颈椎植骨术;颈椎病损切除术
15106	O211脊柱外科	2024-10-02	2024-10-10	3553783	谷逍何	1	73Y	腰椎骨折	腰椎间盘突出;前列腺增生;前列腺结石;后天性肾囊肿;脂肪肝	好转	林焱	许聪	许聪	腰椎骨折切开复位内固定术
15107	O211脊柱外科	2024-10-02	2024-10-10	3553787	林松莲	2	58Y	腰椎骨折L1	肺肿物	好转	林焱	许聪	许聪	腰椎骨折切开复位内固定术
15108	O211脊柱外科	2024-10-06	2024-10-10	3553792	姜兴	1	80Y	腰椎骨折L3	骨质疏松;腰椎间盘突出;阿尔茨海默病;下肢动脉粥样硬化;肝内胆管结石;后天性肾囊肿;前列腺增生;前列腺结石;肺部感染;特发性(原发性)高血压;2型糖尿病;下肢静脉肌间血栓形成;胫前动脉狭窄;腰椎前移	治愈	王向阳	盛孙仁	盛孙仁	腰椎骨折球囊扩张成形术;经皮椎骨成形术
15109	O211脊柱外科	2024-10-02	2024-10-11	3554253	高阿莲	2	88Y	腰椎压缩性骨折	胸椎压缩性骨折;骨质疏松;高血压;糖尿病不伴有并发症;后天性肾囊肿;肾上腺良性肿瘤;胆囊息肉	治愈	毛方敏	毛方敏	周凯亮	腰椎骨折球囊扩张成形术
15110	O211脊柱外科	2024-09-27	2024-10-12	3553782	徐金崽	1	48Y	腰椎骨折	腰椎间盘突出;创伤性胸腔积液;肺肿物;脂肪肝;前列腺结石	治愈	林焱	许聪	许聪	腰椎骨折切开复位内固定术
15111	O211脊柱外科	2024-10-07	2024-10-12	3554427	陈松翠	2	53Y	胸椎多处骨折	骨质疏松伴有病理性骨折;头皮裂伤;颈椎病;多发性肝囊肿;胆囊结石;后天性肾囊肿	治愈	武垚森	王胜	武垚森	胸椎骨折球囊扩张成形术;椎骨活组织检查
15112	O211脊柱外科	2024-10-06	2024-10-12	3554516	柯荣叶	2	74Y	骨质疏松伴有病理性骨折，其他的	腰椎骨折;胸椎骨折;高血压;脂肪肝;肾结石;后天性肾囊肿	好转	林仲可	林仲可	林仲可	胸椎骨折切开复位内固定术;腰椎骨折球囊扩张成形术;椎骨活组织检查
15113	O211脊柱外科	2024-10-07	2024-10-12	3554606	谢陈差	2	58Y	腰椎压缩性骨折	腰椎间盘突出;肺肿物;脂肪肝;胆囊息肉;高血压	治愈	林焱	许聪	许聪	腰椎骨折球囊扩张成形术
15114	O211脊柱外科	2024-10-06	2024-10-13	3554760	黄晓明	1	43Y	多发性骨髓瘤	肿瘤性病理性骨折;肝囊肿;前列腺结石	未愈	毛方敏	毛方敏	吴周士
15115	O211脊柱外科	2024-09-21	2024-10-13	3554784	万寿一	1	56Y	第二颈椎骨折	颈椎多发性骨折;脑挫伤;颧弓骨折;蝶骨骨折;上颌骨骨折;上颌窦骨折;肋骨骨折;颈椎退行性病变;胸椎退行性病变;特发性(原发性)高血压;痛风;肺肿物;胆囊炎;陈旧性肋骨骨折;胆囊胆固醇沉着症	治愈	王向阳	盛孙仁	盛孙仁	寰-枢椎融合术，后入路;髂骨切除术用作移植物;颈椎植骨术;颈椎骨折切开复位内固定术;2-3个椎骨融合或再融合
15116	O211脊柱外科	2024-10-08	2024-10-13	3554835	祝小莲	2	52Y	胸椎骨折	肺挫伤;上颌窦炎;肝囊肿;胆囊切除术后状态;脂肪肝;女性盆腔炎	治愈	武垚森	武垚森	武垚森	胸椎骨折球囊扩张成形术
15117	O211脊柱外科	2024-10-07	2024-10-13	3555053	王丐英	2	68Y	腰椎骨折	骨质疏松;高血压;肺肿物;脂肪肝;腔隙性脑梗死	治愈	林仲可	林仲可	林仲可	腰椎骨折球囊扩张成形术;椎骨活组织检查
15118	O211脊柱外科	2024-10-08	2024-10-14	3555179	刘益华	2	69Y	胸椎多处骨折	骨质疏松;颈椎骨折C3;肺挫伤;特发性(原发性)高血压;肋骨多处骨折;头皮挫伤;创伤性胸腔积液;腰椎前移;颈椎间盘突出;腰椎间盘突出;陈旧性胸椎骨折;脂肪肝;后天性肾囊肿	好转	武垚森	武垚森	王胜	胸椎骨折球囊扩张成形术
15119	O211脊柱外科	2024-10-09	2024-10-14	3555368	林春兰	2	70Y	骨质疏松伴有病理性骨折，其他的	胸椎骨折;特发性(原发性)高血压;胃炎;子宫平滑肌瘤;胆囊结石;肝回声不均	好转	王向阳	盛孙仁	盛孙仁	胸椎骨折球囊扩张成形术
15120	O211脊柱外科	2024-10-09	2024-10-15	3555655	陈美钧	2	80Y	骨质疏松伴有病理性骨折，其他的	胸椎压缩性骨折;骶骨骨折;腰椎间盘突出;腰椎椎管狭窄;腰椎骨折L4	好转	林焱	许聪	许聪	胸椎骨折球囊扩张成形术
15121	O211脊柱外科	2024-10-08	2024-10-15	3555669	陈士荣	1	57Y	取除骨折内固定装置	前列腺增生;前列腺结石;肺肿物;可疑结核病的观察	其他	林焱	许聪	许聪	脊柱内固定装置去除术
15122	O211脊柱外科	2024-10-11	2024-10-15	3555674	郑秀琴	2	88Y	胸椎压缩性骨折	骨质疏松伴有病理性骨折;脊柱侧弯;胸椎退行性病变;脊柱血管瘤;肺挫伤;创伤性胸腔积液;肺肿物;二尖瓣钙化;多发性肝囊肿;胆囊息肉;主动脉钙化;肾错构瘤	治愈	武垚森	武垚森	王胜	胸椎骨折球囊扩张成形术
15123	O211脊柱外科	2024-10-12	2024-10-16	3556031	张仕军	1	57Y	胸椎多处骨折	腰椎压缩性骨折;肋骨骨折;肺肿物;肾结石;后天性肾囊肿;腰椎退行性病变;椎间盘膨隆;可疑疾病和情况的观察，其他的	好转	王向阳	盛孙仁	盛孙仁
15124	O211脊柱外科	2024-10-11	2024-10-16	3556032	周小梅	2	68Y	骨质疏松伴有病理性骨折，其他的	腰椎骨折;胸椎骨折;高脂血症;甲状腺肿;颈椎间盘突出;腰椎间盘退行性病变;胸椎间盘变性;主动脉钙化;后天性肾囊肿;胸椎退行性病变	治愈	武垚森	武垚森	王胜	胸椎骨折球囊扩张成形术;腰椎骨折球囊扩张成形术
15125	O211脊柱外科	2024-10-07	2024-10-16	3556125	蒋玉翠	2	58Y	腰椎骨折	胸椎骨折;腹腔积血;脾损伤;肋骨骨折;特发性(原发性)高血压;创伤性胸腔积液;肺肿物;腰椎间盘突出;腹部损伤	好转	林焱	许聪	许聪	腰椎骨折切开复位内固定术
15126	O211脊柱外科	2024-10-12	2024-10-16	3556199	廖阿英	2	68Y	骨质疏松伴有病理性骨折，其他的	腰椎退行性病变;腰椎压缩性骨折;腰椎间盘突出;脊柱血管瘤;脂肪肝;腰椎椎管狭窄	好转	毛方敏	毛方敏	许聪
15127	O211脊柱外科	2024-10-09	2024-10-16	3556472	刘胜义	1	64Y	颈椎骨折	胸椎骨折;肝囊肿;胆囊结石;肾结石;头皮血肿	好转	林仲可	林仲可	林仲可
15128	O211脊柱外科	2024-10-14	2024-10-17	3556537	曾韩忠	1	27Y	腰椎压缩性骨折	脂肪肝;创伤性胸腔积液	未愈	林焱	许聪	许聪
15129	O211脊柱外科	2024-10-08	2024-10-17	3556566	薛银莲	2	52Y	腰椎骨折	腰椎间盘突出;单纯性甲状腺肿	治愈	武垚森	武垚森	王胜	腰椎骨折切开复位内固定术;腰椎植骨术;腰椎椎体间融合术，后入路;2-3个椎骨融合或再融合
15130	O211脊柱外科	2024-10-13	2024-10-17	3556567	高美英	2	69Y	胸椎骨折	椎体海绵状血管畸形;腰椎前移;腰椎间盘突出;骨质疏松;脂肪肝;肾结石;腰背部筋膜炎	好转	林焱	许聪	许聪	胸椎骨折球囊扩张成形术
15131	O211脊柱外科	2024-10-13	2024-10-19	3557148	邱彩柳	2	77Y	胸椎压缩性骨折	陈旧性腰椎骨折;腰椎间盘突出;腰椎椎管狭窄;骨质疏松;特发性(原发性)高血压;腰背部筋膜炎;脂肪肝;胆囊结石;胆管结石;肺肿物	好转	林焱	许聪	许聪	胸椎骨折球囊扩张成形术
15132	O211脊柱外科	2024-10-13	2024-10-19	3557152	蔡万满	1	37Y	取除骨折内固定装置	脂肪肝	其他	武垚森	武垚森	王胜	脊柱内固定装置去除术
15133	O211脊柱外科	2024-10-13	2024-10-19	3557182	陈春竹	2	65Y	胸椎压缩性骨折	腰椎退行性病变;腰椎峡部裂;腰椎间盘突出;蛛网膜囊肿;脂肪肝;慢性心力衰竭;胸椎退行性病变;腰椎前移	治愈	毛方敏	毛方敏	许聪	胸椎骨折球囊扩张成形术
15134	O211脊柱外科	2024-10-13	2024-10-20	3557651	陈小红	2	57Y	取除骨折内固定装置	骨质疏松伴有病理性骨折;骨质增生;肾结石	其他	武垚森	王胜	武垚森	脊柱内固定装置去除术
15135	O211脊柱外科	2024-10-07	2024-10-21	3558222	陈本球	1	63Y	颈部脊髓损伤	颈椎棘突骨折;胸椎骨折;三角骨骨折;鼻骨骨折;肌腱和肌肉损伤;顶骨骨折;脑水肿;糖尿病;肝内钙化点;肺挫伤;多发性肝囊肿;胆囊息肉;前列腺增生;前列腺结石	好转	林仲可	林仲可	林仲可
15136	O211脊柱外科	2024-10-12	2024-10-21	3558224	金理寿	1	38Y	腰椎骨折	腰椎间盘突出;肺肿物;甲状腺结节	治愈	王向阳	盛孙仁	盛孙仁	腰椎骨折切开复位内固定术;腰椎植骨术
15137	O211脊柱外科	2024-10-12	2024-10-22	3558502	杨树堂	1	42Y	胸椎压缩性骨折	慢性胃炎;肺肿物;前列腺结石	治愈	王向阳	盛孙仁	盛孙仁	胸椎骨折切开复位内固定术;胸椎植骨术
15138	O211脊柱外科	2024-10-17	2024-10-22	3558529	吴立诚	1	86Y	腰椎骨折	腰椎间盘突出;特发性(原发性)高血压;后天性肾囊肿;下肢动脉粥样硬化;血管支架植入术后状态;膀胱术后;膀胱恶性肿瘤	治愈	王向阳	盛孙仁	盛孙仁	腰椎骨折球囊扩张成形术;经皮椎骨成形术
15139	O211脊柱外科	2024-10-13	2024-10-22	3558655	黄领珠	2	58Y	腰椎压缩性骨折	骨质疏松;脂肪肝;胆囊息肉;胸椎退行性病变	好转	林焱	许聪	许聪	腰椎骨折切开复位内固定术
15140	O211脊柱外科	2024-10-12	2024-10-22	3558725	程木才	1	40Y	腰椎压缩性骨折	胸椎棘突骨折;腰椎间盘突出;2型糖尿病;特发性(原发性)高血压;慢性胃炎;乙型病毒性肝炎;肺肿物;脂肪肝;胆囊息肉	治愈	王向阳	盛孙仁	盛孙仁	腰椎骨折切开复位内固定术;腰椎植骨术
15141	O211脊柱外科	2024-10-20	2024-10-22	3558805	蒋碎芬	2	68Y	腰椎骨折	腰椎间盘突出;手术后状态，其他特指的	好转	王向阳	盛孙仁	盛孙仁
15142	O211脊柱外科	2024-10-13	2024-10-23	3558928	邱信美	2	62Y	颈部脊髓损伤	颈椎间盘突出;肋骨骨折;创伤性胸腔积液;脂肪肝;肾结石;心功能不全;多处挫伤	好转	武垚森	武垚森	武垚森	前入路颈椎融合术;颈椎间盘切除术;金属脊椎融合物置入术;2-3个椎骨融合或再融合;颈椎植骨术
15143	O211脊柱外科	2024-10-09	2024-10-23	3558938	李江波	1	30Y	腰椎骨折	胸椎骨折	好转	林焱	许聪	许聪	胸椎骨折切开复位内固定术;腰椎骨折切开复位内固定术
15144	O211脊柱外科	2024-10-08	2024-10-23	3558945	张志华	1	70Y	胸椎骨折	脊髓损伤;尺骨桡骨闭合性骨折;腕骨骨折;骨质疏松;强直性脊柱炎;脊柱血管瘤;糖尿病;脑梗死后遗症;主动脉钙化;甲状腺结节;甲状腺钙化;脂肪肝;后天性肾囊肿;前列腺增生	治愈	武垚森	武垚森	王胜	胸椎骨折切开复位内固定术;胸椎椎板切除减压术;胸椎植骨术
15145	O211脊柱外科	2024-10-13	2024-10-23	3558949	王旭养	2	33Y	腰椎骨折	胆囊息肉	好转	林焱	许聪	许聪	腰椎骨折切开复位内固定术
15146	O211脊柱外科	2024-10-13	2024-10-23	3558997	陈剑飞	2	49Y	胸椎骨折		治愈	王向阳	盛孙仁	盛孙仁	胸椎骨折切开复位内固定术
15147	O211脊柱外科	2024-10-14	2024-10-25	3559876	朱金香	2	66Y	腰椎骨折	骨质疏松;脊柱血管瘤;脂肪肝	治愈	林仲可	林仲可	林仲可	腰椎骨折球囊扩张成形术;椎骨活组织检查
15148	O211脊柱外科	2024-10-07	2024-10-25	3559961	聂军	2	65Y	腰椎继发恶性肿瘤	病理性骨折，不可归类在他处者;腰椎椎管狭窄;特发性(原发性)高血压;宫颈恶性肿瘤;肾挛缩;肾盂积水，其他的;血管支架植入术后状态;输尿管积水;宫颈术后	治愈	王向阳	盛孙仁	盛孙仁	腰椎病损切除术;脊髓神经根粘连松解术;黄韧带部分切除术;经皮椎骨成形术
15149	O211脊柱外科	2024-10-13	2024-10-26	3560043	卓清启	1	74Y	腰椎骨折L3	桡骨远端骨折;肺挫伤;心包积液;肝囊肿;脾囊肿;前列腺增生;胸椎骨折;创伤性胸腔积液;前列腺结石	治愈	武垚森	王胜	王胜	腰椎骨折切开复位内固定术;胸椎骨折球囊扩张成形术;腰椎植骨术
15150	O211脊柱外科	2024-10-22	2024-10-26	3560054	赵宗妹	2	68Y	骨质疏松伴有病理性骨折，其他的	胸椎压缩性骨折;特发性(原发性)高血压;胆管扩张;胆囊结石伴慢性胆囊炎;下肢动脉粥样硬化;肾盂积水，其他的;肺肿物;肺大疱	好转	王向阳	盛孙仁	盛孙仁	胸椎骨折球囊扩张成形术;经皮椎骨成形术
15151	O211脊柱外科	2024-10-15	2024-10-26	3560061	泮秋香	2	60Y	腰椎骨折	胸椎骨折;骨质疏松;肋骨骨折;创伤性胸腔积液;肺不张;脊椎退行性病变;肝钙化灶;肝囊肿	治愈	武垚森	武垚森	武垚森	胸椎骨折切开复位内固定术;腰椎骨折切开复位内固定术;经皮椎骨成形术;腰椎骨折球囊扩张成形术
15152	O211脊柱外科	2024-10-21	2024-10-26	3560284	周张娥	2	85Y	胸椎骨折	骨质疏松;特发性(原发性)高血压;具有心脏起搏器;脊椎退行性病变;间质性肺炎;脂肪肝;肾结石;后天性肾囊肿	治愈	武垚森	武垚森	武垚森	胸椎骨折球囊扩张成形术
15153	O211脊柱外科	2024-10-22	2024-10-26	3560456	谢建高	1	47Y	取除骨折内固定装置	脂肪肝;前列腺增生	其他	杨雷	应晓洲	谢忠杰	踝关节内固定装置去除术
15154	O211脊柱外科	2024-10-17	2024-10-27	3560573	张良	1	43Y	腰椎骨折	颈椎间盘突出;脑挫伤;皮下血肿;皮肤挫伤;脂肪肝;胆囊胆固醇沉着症;前列腺增生;前列腺囊肿	治愈	王向阳	盛孙仁	盛孙仁	腰椎骨折切开复位内固定术
15155	O211脊柱外科	2024-10-22	2024-10-27	3560575	凌振星	1	47Y	取除骨折内固定装置	后天性肾囊肿;前列腺结石;肺肿物;前列腺增生;肾超声检查异常	其他	杨雷	应晓洲	谢忠杰	胫骨内固定装置去除术;骨移植术
15156	O211脊柱外科	2024-10-23	2024-10-27	3560814	刘岩钱	1	83Y	腰椎骨折	骨质疏松;肺部感染;特发性(原发性)高血压;老年性痴呆;脊柱侧弯;创伤性胸腔积液;脂肪肝;肾结石;后天性肾囊肿;前列腺增生	治愈	武垚森	武垚森	武垚森	腰椎骨折球囊扩张成形术
15157	O211脊柱外科	2024-10-22	2024-10-28	3560933	徐海哨	1	47Y	腰椎压缩性骨折	胸椎结核;胸椎退行性病变;腰椎退行性病变;腰骶椎间盘突出;舒张性心力衰竭;前列腺结石;窦性心动过缓	好转	毛方敏	毛方敏	吴周士
15158	O211脊柱外科	2024-10-16	2024-10-29	3561371	董细菊	2	58Y	颈部脊髓损伤	颈椎间盘突出;颈椎椎管狭窄;颈椎退行性病变;骨折术后;腓骨头骨折;膝关节退行性病变;舒张性心力衰竭;高血压;子宫平滑肌瘤;梅毒	治愈	毛方敏	毛方敏	吴周士	颈椎后路单开门椎管减压术;椎骨内固定术
15159	O211脊柱外科	2024-10-22	2024-10-30	3561976	戴冬花	2	77Y	胸椎压缩性骨折	颈椎间盘突出;腰椎间盘突出;肺肿物;胸椎退行性病变;腰椎退行性病变;甲状腺钙化;后天性肾囊肿;舒张性心力衰竭	治愈	毛方敏	毛方敏	许聪	胸椎骨折球囊扩张成形术
15160	O211脊柱外科	2024-10-22	2024-10-30	3561984	王寿选	1	62Y	腰椎压缩性骨折	腰骶椎间盘突出;腰椎退行性病变;肺肿物;多发性肝囊肿;脂肪肝;前列腺增生;手术后状态，其他特指的	治愈	毛方敏	毛方敏	许聪	腰椎骨折球囊扩张成形术
15161	O211脊柱外科	2024-10-14	2024-10-30	3561990	罗希盛	1	60Y	颈椎骨折C7	颈椎间盘突出;颈椎退行性病变;鼻窦炎;颈椎椎管狭窄;胸椎骨折;颈椎椎管狭窄	治愈	毛方敏	毛方敏	许聪	前入路颈椎融合术;颈椎植骨术;椎骨内固定术;金属脊椎融合物置入术;颈椎前路椎管减压术;前入路颈椎间盘切除术;2-3个椎骨融合或再融合
15162	O211脊柱外科	2024-10-19	2024-10-31	3562273	赵廷华	1	70Y	腰椎压缩性骨折	胸椎退行性病变;腰椎退行性病变;舒张性心力衰竭;陈旧性肋骨骨折;后天性肾囊肿;前列腺结石;下肢动脉粥样硬化	治愈	毛方敏	毛方敏	许聪	腰椎骨折切开复位内固定术
15163	O211脊柱外科	2024-10-27	2024-10-31	3562277	吴爱娟	2	79Y	骨质疏松伴有病理性骨折，其他的	腰椎压缩性骨折;腰椎间盘突出;后天性肾囊肿;肾结石;陈旧性腰椎骨折	好转	林焱	林焱	许聪	腰椎骨折球囊扩张成形术
15164	O211脊柱外科	2024-10-24	2024-10-31	3562381	郑金线	1	56Y	胸椎骨折	肺气肿;肺\[部分\]后天性缺失	治愈	林仲可	林仲可	林仲可	胸椎骨折球囊扩张成形术;椎骨活组织检查
15165	O211脊柱外科	2024-10-28	2024-11-01	3562600	陈赛赛	2	55Y	腰椎压缩性骨折	骨质疏松;特发性(原发性)高血压;脂肪肝;肺肿物	治愈	王向阳	盛孙仁	盛孙仁	腰椎骨折球囊扩张成形术;经皮椎骨成形术
15166	O211脊柱外科	2024-10-25	2024-11-02	3562816	张玉波	1	34Y	取除骨折内固定装置	脂肪肝;胆囊结石	其他	武垚森	王胜	王胜	脊柱内固定装置去除术
15167	O211脊柱外科	2024-10-25	2024-11-02	3563001	王进月	2	55Y	腰椎骨折L1	腰椎间盘突出;慢性乙型病毒性肝炎;胆囊结石;胸椎退行性病变;腰椎退行性病变	好转	林焱	许聪	许聪	腰椎骨折切开复位内固定术
15168	O211脊柱外科	2024-10-21	2024-11-02	3563008	李爱华	2	83Y	骨质疏松伴有病理性骨折	腰椎压缩性骨折;巨幼细胞性贫血;肾性贫血;慢性肾功能不全;后天性肾囊肿;心包积液;老年性脑萎缩;下肢动脉粥样硬化;腰椎前移;腰椎间盘突出;老年性心脏病;消化道出血;帕金森病	好转	毛方敏	毛方敏	毛方敏	腰椎骨折球囊扩张成形术;椎骨活组织检查
15169	O211脊柱外科	2024-10-22	2024-11-03	3563230	毛显广	1	40Y	腰椎压缩性骨折	跟骨骨折;腰椎间盘突出;肋骨骨折	好转	毛方敏	毛方敏	毛方敏	腰椎骨折切开复位内固定术
15170	O211脊柱外科	2024-10-29	2024-11-03	3563234	徐春兰	2	64Y	胸椎骨折	外踝骨折;腰椎楔形变;骨质疏松伴有病理性骨折;肋骨多处骨折;多处挫伤;肺肿物	治愈	武垚森	武垚森	武垚森	胸椎骨折球囊扩张成形术
15171	O211脊柱外科	2024-10-28	2024-11-03	3563237	刘美茶	2	73Y	骨质疏松伴有病理性骨折，其他的	腰椎间盘突出;腰椎压缩性骨折;脂肪肝;胸椎退行性病变;腰椎退行性病变	好转	林焱	许聪	许聪	腰椎骨折球囊扩张成形术
15172	O211脊柱外科	2024-10-20	2024-11-03	3563360	刘红万	1	22Y	胸椎骨折	截瘫[双下肢瘫痪];创伤性胸腔积液;脑术后;肋骨骨折;胸椎脱位	治愈	王向阳	盛孙仁	盛孙仁	胸椎间盘切除伴椎板切除术;胸椎骨折切开复位内固定术;胸椎植骨术;金属脊椎融合物置入术;2-3个椎骨融合或再融合;胸椎融合术，后入路
15173	O211脊柱外科	2024-10-28	2024-11-03	3563401	毕四秀	2	60Y	腰椎压缩性骨折	骨质疏松;腰椎间盘突出;胸腔积液;肺钙化	治愈	王向阳	盛孙仁	盛孙仁	腰椎骨折球囊扩张成形术;经皮椎骨成形术
15174	O211脊柱外科	2024-10-16	2024-11-03	3563430	雷华远	1	40Y	胸椎骨折	胸椎脱位;多处挫伤;液气胸;支气管狭窄;支气管瘘;胸部损伤;肋骨多处骨折;肺挫伤;肺部感染;胸骨骨折;颈椎横突骨折;胸椎横突骨折;骨折术后;肩胛骨骨折	好转	林仲可	林仲可	林仲可	胸椎植骨术;胸椎骨折切开复位内固定术
15175	O211脊柱外科	2024-10-24	2024-11-04	3563758	柯林望	1	48Y	腰椎骨折	慢性乙型病毒性肝炎;胆囊息肉;肾结石;前列腺增生;前列腺结石	治愈	林仲可	林仲可	林仲可	腰椎骨折切开复位内固定术
15176	O211脊柱外科	2024-11-01	2024-11-04	3563762	张纯棣	1	60Y	腰椎骨折	甲状腺术后;甲状腺结节;后天性肾囊肿;前列腺结石	治愈	林仲可	林仲可	林仲可	腰椎骨折球囊扩张成形术;椎骨活组织检查
15177	O211脊柱外科	2024-10-27	2024-11-05	3564079	郑寿党	1	78Y	胸椎压缩性骨折	冠状动脉粥样硬化性心脏病;高血压;脂肪肝;前列腺结石;骨质疏松;骨折术后;胸椎退行性病变;腰椎退行性病变	好转	林焱	许聪	许聪	胸椎骨折球囊扩张成形术
15178	O211脊柱外科	2024-10-23	2024-11-05	3564091	周黎雅	2	34Y	多发性腰椎骨折	脊髓损伤;腹部损伤;急性失血性贫血;胸椎骨折;手术后状态，其他特指的;截瘫[双下肢瘫痪];结肠损伤	好转	林焱	许聪	许聪	腰椎椎体间融合术，后入路;2-3个椎骨融合或再融合;金属脊椎融合物置入术;脊髓神经根粘连松解术;黄韧带部分切除术;腰椎骨折切开复位内固定术
15179	O211脊柱外科	2024-10-27	2024-11-05	3564116	陈赛利	2	54Y	腰椎骨折L2	颈椎退行性病变;颈椎间盘突出;腰椎间盘突出;腰椎退行性病变;胸椎退行性病变	治愈	王向阳	盛孙仁	盛孙仁	腰椎骨折切开复位内固定术;腰椎植骨术
15180	O211脊柱外科	2024-11-01	2024-11-05	3564162	陈廷营	1	63Y	腰椎压缩性骨折	腰椎间盘突出;2型糖尿病;骨质疏松，其他的;腰椎退行性病变;胸椎退行性病变	治愈	林焱	许聪	许聪	腰椎骨折球囊扩张成形术
15181	O211脊柱外科	2024-10-31	2024-11-05	3564345	杨月娥	2	66Y	腰椎骨折L2	骨质疏松;高血压;脊椎前移;脂肪肝;肝钙化灶;特发性肺纤维化;肺肿物	治愈	武垚森	武垚森	武垚森	腰椎骨折球囊扩张成形术;椎骨活组织检查
15182	O211脊柱外科	2024-11-01	2024-11-06	3564511	张招弟	2	81Y	骨质疏松伴有病理性骨折，其他的	腰椎骨折;高血压;糖尿病;肺肿物;肝囊肿;肝内钙化点;下肢静脉肌间血栓形成	好转	林仲可	林仲可	林仲可	腰椎骨折球囊扩张成形术;椎骨活组织检查
15183	O211脊柱外科	2024-10-29	2024-11-07	3564915	林爱绸	2	80Y	腰椎压缩性骨折	腰椎椎管狭窄;腰椎间盘突出;骨质疏松;高血压;糖尿病不伴有并发症;骨折术后;脂肪肝;胆囊结石	好转	林焱	许聪	许聪	腰椎骨折球囊扩张成形术
15184	O211脊柱外科	2024-10-28	2024-11-07	3564927	叶连凤	1	54Y	腰椎骨折L1	腰椎椎管狭窄;胸椎棘突骨折;腰椎间盘突出;腰椎退行性病变;胸椎退行性病变;桡骨远端骨折;高血压;肝囊肿;后天性肾囊肿;室间隔肥大	好转	王向阳	盛孙仁	盛孙仁	腰椎骨折切开复位内固定术;腰椎植骨术
15185	O211脊柱外科	2024-11-05	2024-11-08	3565371	张胡柳	2	76Y	腰椎压缩性骨折	骨质疏松;胸椎退行性病变;下肢动脉粥样硬化;支气管扩张(症);陈旧性腰椎骨折;腰椎退行性病变	好转	王向阳	盛孙仁	盛孙仁	腰椎骨折球囊扩张成形术;经皮椎骨成形术
15186	O211脊柱外科	2024-11-03	2024-11-08	3565383	黄加弟	2	82Y	骨质疏松伴有病理性骨折，其他的	骨质疏松;腰骶椎间盘突出;胸椎退行性病变;腰部软组织损伤;多发性肝囊肿;下肢动脉粥样硬化;后天性肾囊肿;腰椎退行性病变	好转	王向阳	盛孙仁	盛孙仁	腰椎骨折球囊扩张成形术;经皮椎骨成形术
15187	O211脊柱外科	2024-11-05	2024-11-09	3565527	金孔力	1	70Y	胸椎压缩性骨折	骶椎腰化;骨质疏松;脂肪肝;肝囊肿;膀胱炎;前列腺增生;前列腺结石	治愈	武垚森	武垚森	王胜	胸椎骨折球囊扩张成形术
15188	O211脊柱外科	2024-10-28	2024-11-09	3565552	周丕竹	1	75Y	颈椎骨折	颈部脊髓损伤;截瘫;胸椎骨折;颈椎退行性病变;颈椎间盘突出;颈椎椎管狭窄;皮下血肿;2型糖尿病;创伤性胸腔积液;下肢动脉粥样硬化;睾丸鞘膜积液;后天性肾囊肿;前列腺增生;男性盆腔炎;前列腺钙化灶;颈椎脱位	好转	王向阳	盛孙仁	盛孙仁	颈椎前路椎管减压术;颈椎间盘切除术;金属脊椎融合物置入术;2-3个椎骨融合或再融合;颈椎植骨术
15189	O211脊柱外科	2024-11-04	2024-11-09	3565756	侯凤英	2	69Y	骨质疏松伴有病理性骨折，其他的	胸椎压缩性骨折;脊柱侧弯;胸椎退行性病变;腰椎术后	好转	林焱	林焱	艾鹏	胸椎骨折球囊扩张成形术
15190	O211脊柱外科	2024-11-05	2024-11-10	3565669	李世本	1	69Y	腰椎压缩性骨折	高血压;腰椎退行性病变;胸椎退行性病变;2型糖尿病;骨质疏松	好转	林焱	许聪	许聪	腰椎骨折球囊扩张成形术
15191	O211脊柱外科	2024-10-31	2024-11-10	3566014	夏飞云	2	52Y	胸椎骨折	胸椎椎管狭窄;腰椎间盘突出;腰椎退行性病变;胸椎退行性病变;脊柱血管瘤	好转	王向阳	盛孙仁	盛孙仁	胸椎骨折切开复位内固定术;椎弓根钉内固定术
15192	O211脊柱外科	2024-10-31	2024-11-10	3566161	金慎村	1	55Y	胸椎骨折	腰椎骨折;特发性(原发性)高血压;脑卒中后遗症;肝囊肿;前列腺增生;前列腺结石	治愈	武垚森	武垚森	武垚森	胸椎骨折球囊扩张成形术;腰椎骨折球囊扩张成形术
15193	O211脊柱外科	2024-11-05	2024-11-11	3566453	陈彩芬	2	73Y	胸椎骨折	脊柱血管瘤;骨质疏松;腰椎间盘突出;腰椎椎管狭窄;肋骨骨折;高血压;老年性脑萎缩;脂肪肝;下肢动脉粥样硬化;糖尿病	好转	毛方敏	毛方敏	毛方敏	胸椎骨折球囊扩张成形术;腰椎骨折球囊扩张成形术
15194	O211脊柱外科	2024-10-29	2024-11-11	3566473	李希林	1	56Y	胸椎压缩性骨折	胸椎棘突骨折;面部软组织挫伤;液气胸;肋骨骨折;骨质疏松;胆囊炎;胆囊息肉;前列腺结石;肝血管瘤;骨折术后	好转	林焱	许聪	许聪	胸椎骨折切开复位内固定术
15195	O211脊柱外科	2024-11-07	2024-11-11	3566506	徐金翠	2	73Y	腰椎骨折	腰椎间盘突出;颈椎间盘突出;特发性(原发性)高血压;2型糖尿病;心律失常;脂肪肝;肺肿物;腰椎间盘变性	治愈	武垚森	武垚森	武垚森	腰椎骨折球囊扩张成形术
15196	O211脊柱外科	2024-11-07	2024-11-11	3566508	陈金连	2	71Y	腰椎骨折	骨质疏松;糖尿病;高血压;脂肪肝;肝钙化灶	治愈	武垚森	武垚森	武垚森	腰椎骨折球囊扩张成形术
15197	O211脊柱外科	2024-11-06	2024-11-11	3566754	夏帮田	1	66Y	胸椎压缩性骨折	骨质疏松;腰椎间盘突出;膝关节十字韧带扭伤;膝关节副韧带扭伤;膝关节积液;高血压;前列腺结石	治愈	毛方敏	毛方敏	毛方敏	胸椎骨折球囊扩张成形术
15198	O211脊柱外科	2024-10-22	2024-11-11	3566783	杜红坤	1	55Y	胸椎骨折	胸椎横突骨折;锁骨肩峰端骨折;腓骨头骨折;多处开放性伤口;肺挫伤;头皮血肿;面部软组织挫伤;创伤性肾血肿;膝内侧半月板撕裂;膝关节内侧副韧带损伤;膝关节十字韧带损伤;膝关节积液;脂肪肝;肺肿物;前列腺结石;下肢动脉粥样硬化	治愈	武垚森	武垚森	武垚森	胸椎骨折切开复位内固定术;锁骨骨折切开复位钢板内固定术;关节软骨修复术;胸椎骨折球囊扩张成形术
15199	O211脊柱外科	2024-11-05	2024-11-12	3566933	陈女妹	2	72Y	骨质疏松伴有病理性骨折，其他的	骨折术后;胸椎压缩性骨折;脊柱后凸;胆囊息肉;下肢动脉粥样硬化;陈旧性胸椎骨折;陈旧性腰椎骨折	好转	毛方敏	毛方敏	毛方敏	胸椎骨折球囊扩张成形术
15200	O211脊柱外科	2024-10-30	2024-11-12	3567037	许方向	1	68Y	颈椎骨折	颈椎间盘突出;颈椎退行性病变;后天性肾囊肿;肾结石;肝囊肿	好转	林焱	许聪	许聪	颈椎后路单开门椎管减压术;椎管成形术
15201	O211脊柱外科	2024-11-09	2024-11-12	3567201	池林弟	2	50Y	腰椎骨折	肺肿物;脂肪肝;肾结石	治愈	林仲可	林仲可	林仲可	腰椎骨折球囊扩张成形术;椎骨活组织检查
15202	O211脊柱外科	2024-11-05	2024-11-13	3567475	王世军	1	57Y	腰椎骨折	胸椎骨折;尾骨骨折	好转	林焱	许聪	许聪	腰椎骨折切开复位内固定术
15203	O211脊柱外科	2024-10-28	2024-11-13	3567495	叶克明	1	70Y	胸椎骨折	强直性脊柱炎;头皮血肿;多处挫伤;创伤性胸腔积液;肺气肿合并肺大泡;肝囊肿;单侧腹股沟疝;颈椎退行性病变;睾丸囊肿;睾丸鞘膜积液;腓骨颈骨折;尺骨上端骨折;下肢动脉粥样硬化;肝血管瘤	好转	王向阳	盛孙仁	盛孙仁	胸椎骨折切开复位内固定术;胸椎植骨术
15204	O211脊柱外科	2024-11-09	2024-11-14	3567807	郑桂娥	2	74Y	胸椎压缩性骨折	骨质疏松;单关节炎;腰椎间盘突出;下肢动脉粥样硬化;脂肪肝;肾结石;肺诊断性影像异常;膝关节积液;半月板撕裂，近期的;膝关节滑膜炎;骨折术后	好转	林焱	许聪	许聪	胸椎骨折球囊扩张成形术
15205	O211脊柱外科	2024-11-10	2024-11-14	3567950	王菊花	2	76Y	腰椎压缩性骨折	骨质疏松;高血压;胸椎棘突骨折;腰椎间盘突出;颈椎间盘突出;后天性肾囊肿;脂肪肝;下肢动脉粥样硬化;老年性脑萎缩	好转	王向阳	盛孙仁	盛孙仁	腰椎骨折球囊扩张成形术;椎骨活组织检查;经皮椎骨成形术
15206	O211脊柱外科	2024-11-10	2024-11-15	3568164	吴香妹	2	77Y	胸椎压缩性骨折	腰椎压缩性骨折;骨质疏松;下肢静脉肌间血栓形成;高血压;多发性肝囊肿;下肢动脉粥样硬化;甲状腺结节;胆囊结石;陈旧性肋骨骨折;骨折术后	好转	王向阳	盛孙仁	盛孙仁	胸椎骨折球囊扩张成形术;椎骨活组织检查;经皮椎骨成形术;腰椎骨折球囊扩张成形术
15207	O211脊柱外科	2024-11-03	2024-11-16	3568362	张露	2	29Y	腰椎压缩性骨折	颈椎间盘突出;腰椎间盘突出;肺肿物	好转	毛方敏	毛方敏	毛方敏	腰椎骨折切开复位内固定术
15208	O211脊柱外科	2024-11-09	2024-11-16	3568381	周月媚	2	65Y	腰椎骨折	骨质疏松;特发性(原发性)高血压;脂肪肝;胆囊息肉	治愈	武垚森	武垚森	武垚森	腰椎骨折球囊扩张成形术
15209	O211脊柱外科	2024-11-10	2024-11-16	3568615	周黄菊	2	83Y	骨质疏松伴有病理性骨折，其他的	腰椎压缩性骨折;陈旧性胸椎骨折;陈旧性腰椎骨折;陈旧性肋骨骨折;支气管肺炎;哮喘;肺气肿;冠状动脉粥样硬化性心脏病;冠状动脉支架植入后状态;心功能不全;特发性(原发性)高血压;脊椎退行性病变;睡眠障碍;慢性胃炎;肝囊肿;肾结石	好转	武垚森	王胜	王胜	腰椎骨折球囊扩张成形术
15210	O211脊柱外科	2024-11-13	2024-11-17	3568829	夏立玖	1	63Y	腰椎压缩性骨折	骨质疏松;肋骨骨折;腰椎退行性病变;肾结石;后天性肾囊肿;前列腺结石	未愈	王向阳	盛孙仁	盛孙仁
15211	O211脊柱外科	2024-11-07	2024-11-18	3569307	周汉达	1	62Y	腰椎骨折L3	脂肪肝;胆囊息肉;前列腺增生;高血压	好转	林焱	许聪	许聪	腰椎骨折切开复位内固定术
15212	O211脊柱外科	2024-11-11	2024-11-18	3569585	吴方招	1	59Y	腰椎压缩性骨折	骨质疏松;前列腺结石	治愈	武垚森	王胜	王胜	腰椎骨折球囊扩张成形术;椎骨活组织检查
15213	O211脊柱外科	2024-11-02	2024-11-19	3569703	黄玉龙	1	75Y	腰椎椎管狭窄	腰椎间盘突出;陈旧性腰椎骨折;腰椎退行性病变;肝囊肿;肾结石;下肢动脉粥样硬化;前列腺增生	好转	王向阳	盛孙仁	盛孙仁	经椎间孔入路腰椎体融合术;脊神经根阻滞术;腰椎间盘切除伴椎板切除术;金属脊椎融合物置入术;黄韧带部分切除术;腰椎植骨术;脊髓神经根粘连松解术;2-3个椎骨融合或再融合
15214	O211脊柱外科	2024-11-14	2024-11-19	3569708	肖李红	2	64Y	骨质疏松伴有病理性骨折，其他的	陈旧性胸椎骨折;腰椎压缩性骨折;腰椎间盘突出;肺部感染;腹主动脉粥样硬化;肾结石;后天性肾囊肿	好转	毛方敏	毛方敏	毛方敏	腰椎骨折球囊扩张成形术
15215	O211脊柱外科	2024-11-10	2024-11-19	3569711	张军	1	26Y	胸椎骨折	腰椎骨折;肺挫伤;前列腺囊肿;肾结石	治愈	武垚森	武垚森	武垚森	胸椎骨折切开复位内固定术;腰椎骨折切开复位内固定术
15216	O211脊柱外科	2024-09-28	2024-11-19	3569874	王仲阳	1	70Y	脊柱侧弯	腰椎前移;腰椎椎管狭窄;腰椎间盘突出;皮肤和皮下组织的局部感染;颈椎间盘突出;高血压;痛风;肝囊肿;后天性肾囊肿;陈旧性肋骨骨折;前列腺结石	好转	王向阳	盛孙仁	盛孙仁	后外侧入路腰椎融合术;腰椎间盘切除伴椎板切除术;腰椎病损切除术;金属脊椎融合物置入术;2-3个椎骨融合或再融合;脊髓神经根粘连松解术;黄韧带部分切除术;腰椎植骨术;肌肉清创术;创面封闭式负压引流术（VSD)
15217	O211脊柱外科	2024-11-16	2024-11-19	3570022	杨林昆	2	80Y	胸椎骨折	骨质疏松;糖尿病;后天性肾囊肿;肾结石;下肢动脉粥样硬化;肺钙化	治愈	林仲可	林仲可	林仲可	胸椎骨折球囊扩张成形术;椎骨活组织检查
15218	O211脊柱外科	2024-11-16	2024-11-20	3570100	金彩华	2	60Y	胸椎压缩性骨折	骨质疏松;腰椎间盘突出;胆囊息肉;创伤性胸腔积液	好转	王向阳	盛孙仁	盛孙仁	经皮椎骨成形术;椎骨活组织检查;胸椎骨折球囊扩张成形术
15219	O211脊柱外科	2024-11-05	2024-11-20	3570184	陈翠玉	2	73Y	腰椎间盘突出	胸椎压缩性骨折;胸椎退行性病变;腰椎退行性病变;脂肪肝;冠状动脉粥样硬化;高血压;慢性阻塞性肺病	好转	林焱	许聪	许聪	胸椎骨折球囊扩张成形术;腰椎椎体间融合术，后入路;腰椎间盘切除伴椎板切除术;2-3个椎骨融合或再融合;金属脊椎融合物置入术;脊髓神经根粘连松解术;黄韧带部分切除术
15220	O211脊柱外科	2024-11-10	2024-11-21	3570852	何圣菊	2	52Y	肿瘤性病理性骨折	腰椎骨折;脊柱侧弯;脊柱血管瘤;肺占位性病变;肺肿物;肝肿物;腰椎继发恶性肿瘤;肺恶性肿瘤	好转	林仲可	林仲可	林仲可	腰椎骨折球囊扩张成形术;腰椎穿刺术;椎骨活组织检查
15221	O211脊柱外科	2024-11-14	2024-11-22	3570969	施道晓	1	38Y	取除骨折内固定装置	脂肪肝;胆囊息肉;肺肿物	其他	毛方敏	毛方敏	毛方敏	脊柱内固定装置去除术
15222	O211脊柱外科	2024-11-15	2024-11-23	3571247	潘德有	1	55Y	取除骨折内固定装置	脂肪肝;前列腺结石;脂肪瘤	其他	武垚森	武垚森	王胜	脊柱内固定装置去除术
15223	O211脊柱外科	2024-11-08	2024-11-23	3571274	曾小华	2	51Y	腰椎压缩性骨折	腰椎间盘突出;肝钙化灶;肝内胆管结石	治愈	武垚森	武垚森	武垚森	腰椎骨折切开复位内固定术
15224	O211脊柱外科	2024-11-17	2024-11-23	3571338	谷丽萍	2	73Y	腰椎骨折L1	骨质疏松;糖尿病	治愈	武垚森	武垚森	武垚森	腰椎骨折球囊扩张成形术
15225	O211脊柱外科	2024-11-12	2024-11-24	3571628	黄兆俊	1	43Y	取除骨折内固定装置	马尾综合征;肺肿物	其他	毛方敏	毛方敏	毛方敏	脊柱内固定装置去除术
15226	O211脊柱外科	2024-11-16	2024-11-24	3571638	吴昌君	1	49Y	取除骨折内固定装置	骨折术后;高血压;癫痫;脂肪肝	其他	毛方敏	毛方敏	毛方敏	脊柱内固定装置去除术;踝关节内固定装置去除术
15227	O211脊柱外科	2024-11-13	2024-11-24	3571668	叶微平	2	50Y	多发性腰椎骨折	腰椎椎管狭窄;多处开放性伤口;多处挫伤;脊椎退行性病变;肝钙化灶;脂肪肝;胆囊结石;肾错构瘤	好转	武垚森	武垚森	武垚森	腰椎骨折切开复位内固定术
15228	O211脊柱外科	2024-11-20	2024-11-24	3571782	夏建生	1	56Y	取除骨折内固定装置	腰椎退行性病变;肺肿物;后天性肾囊肿;前列腺增生;前列腺结石	其他	武垚森	王胜	王胜	脊柱内固定装置去除术
15229	O211脊柱外科	2024-11-20	2024-11-24	3571785	肖怀栋	1	79Y	骨质疏松伴有病理性骨折，其他的	腰椎骨折;胸椎骨折;胸椎间盘突出;腰椎间盘突出;高脂血症;甲状腺术后;肺肿物;下肢动脉粥样硬化;脂肪肝;后天性肾囊肿;前列腺结石;肺动脉高压	好转	毛方敏	毛方敏	毛方敏	胸椎骨折球囊扩张成形术;腰椎骨折球囊扩张成形术
15230	O211脊柱外科	2024-11-16	2024-11-24	3571795	季金丹	2	83Y	胸椎骨折	骨质疏松;肝囊肿;后天性肾囊肿;腰椎间盘突出;腰椎术后;脊椎退行性病变	好转	林焱	许聪	许聪	胸椎骨折球囊扩张成形术
15231	O211脊柱外科	2024-11-17	2024-11-25	3572166	王苏芬	2	50Y	胸椎压缩性骨折	高血压;肾结石	治愈	武垚森	武垚森	武垚森	胸椎骨折切开复位内固定术
15232	O211脊柱外科	2024-11-17	2024-11-25	3572431	朱珠兰	2	72Y	腰椎间盘突出	骨质疏松;腰椎侧弯;高血压;糖尿病;腔隙性脑梗死;脑白质病;老年性脑萎缩;心功能不全;泌尿道感染;肺部感染;肋骨骨折;胸腔积液;下肢动脉粥样硬化;脂肪肝;后天性肾囊肿;腰椎术后	好转	毛方敏	毛方敏	毛方敏
15233	O211脊柱外科	2024-11-17	2024-11-26	3572545	李方志	1	38Y	腰椎压缩性骨折		好转	林焱	许聪	许聪	腰椎骨折切开复位内固定术
15234	O211脊柱外科	2024-11-17	2024-11-26	3572611	严聪妹	2	85Y	腰椎骨折L2	骨质疏松;脊椎退行性病变;脑梗死后遗症;老年性心脏瓣膜病;后天性肾囊肿;肺部感染;间质性肺病;主动脉钙化;胸椎术后	治愈	武垚森	武垚森	武垚森	腰椎骨折球囊扩张成形术;椎骨活组织检查
15235	O211脊柱外科	2024-11-21	2024-11-26	3572738	姜桂村	1	61Y	腰椎骨折	骨质疏松;腰椎间盘突出;脂肪肝	好转	王向阳	盛孙仁	盛孙仁	腰椎骨折球囊扩张成形术;经皮椎骨成形术;椎骨活组织检查
15236	O211脊柱外科	2024-11-16	2024-11-27	3572941	吴云钗	2	72Y	骨质疏松伴有病理性骨折，其他的	腰椎压缩性骨折;腰椎间盘突出;胸椎退行性病变;腰椎术后;陈旧性腰椎骨折	好转	林焱	许聪	许聪	腰椎骨折球囊扩张成形术
15237	O211脊柱外科	2024-11-20	2024-11-27	3572951	熊小梅	2	74Y	骨质疏松伴有病理性骨折，其他的	胸椎骨折;脊椎退行性病变;高血压;糖尿病;肺气肿;支气管扩张(症);肺气肿合并肺大泡	好转	武垚森	王胜	王胜	胸椎骨折球囊扩张成形术;椎骨活组织检查
15238	O211脊柱外科	2024-11-22	2024-11-27	3572964	杨秀凤	2	81Y	胸椎骨折	骨质疏松;脊柱侧弯;肺气肿;后天性肾囊肿;肾钙化	治愈	武垚森	王胜	王胜	胸椎骨折球囊扩张成形术;椎骨活组织检查
15239	O211脊柱外科	2024-11-22	2024-11-28	3573540	陈以和	1	56Y	胸椎压缩性骨折	腰椎间盘突出;肺肿物;创伤性胸腔积液;肺部感染;糖尿病;下肢动脉粥样硬化;脊柱侧弯	好转	林焱	许聪	许聪	胸椎骨折球囊扩张成形术
15240	O211脊柱外科	2024-11-23	2024-11-28	3573549	戴春花	2	98Y	骨质疏松伴有病理性骨折，其他的	陈旧性胸椎骨折;胸椎骨折;陈旧性肺结核;胸腔积液;后天性肾囊肿;血尿;腰椎术后	好转	武垚森	武垚森	武垚森	胸椎骨折球囊扩张成形术;椎骨活组织检查
15241	O211脊柱外科	2024-11-23	2024-11-28	3573552	张凤英	2	73Y	腰椎压缩性骨折	骨质疏松;脊柱侧弯;腰椎间盘突出;高血压;脂肪肝;后天性肾囊肿	治愈	林焱	许聪	许聪	腰椎骨折球囊扩张成形术
15242	O211脊柱外科	2024-11-17	2024-11-28	3573654	林洪兴	1	60Y	腰椎骨折	高血压;肺挫伤;脊柱血管瘤;老年性心脏瓣膜病;陈旧性脑梗死;后天性肾囊肿;肾结石;肝囊肿;前列腺增生;前列腺结石	治愈	武垚森	武垚森	武垚森	腰椎骨折切开复位内固定术;腰椎植骨术
15243	O211脊柱外科	2024-11-20	2024-11-29	3573757	张生福	2	57Y	骨质疏松伴有病理性骨折，其他的	胸椎骨折;脊柱后凸;腰椎骨折;腰椎楔形变;甲状腺结节;高血压;胸椎楔形变	好转	王向阳	盛孙仁	盛孙仁	腰椎骨折球囊扩张成形术;胸椎骨折球囊扩张成形术;椎骨活组织检查
15244	O211脊柱外科	2024-11-20	2024-11-30	3574130	胡阿美	2	72Y	骨质疏松伴有病理性骨折，其他的	胸椎骨折;腰椎间盘突出;高血压;糖尿病;心脏病;下肢动脉粥样硬化;脂肪肝;心房颤动	好转	毛方敏	毛方敏	毛方敏	胸椎骨折球囊扩张成形术
15245	O211脊柱外科	2024-11-24	2024-11-30	3574142	丁爱连	2	72Y	胸椎压缩性骨折	高血压;后天性肾囊肿;胸椎术后;腰椎退行性病变;腰椎术后	好转	林焱	许聪	许聪	胸椎骨折球囊扩张成形术
15246	O211脊柱外科	2024-11-26	2024-11-30	3574174	温秀梅	2	60Y	胸椎压缩性骨折	腰椎间盘突出;2型糖尿病;脂肪肝;后天性肾囊肿;肺肿物	好转	王向阳	盛孙仁	盛孙仁	胸椎骨折球囊扩张成形术;经皮椎骨成形术;椎骨活组织检查
15247	O211脊柱外科	2024-11-21	2024-11-30	3574224	章飞飞	2	30Y	多发性腰椎骨折	尾骨骨折;骨盆骨折;骨折术后;跖骨骨折;肘关节脱位;皮肤挫伤;肾结石	好转	毛方敏	毛方敏	毛方敏	腰椎骨折切开复位内固定术
15248	O211脊柱外科	2024-11-17	2024-12-01	3574581	汤松弟	1	74Y	颈椎骨折	颈椎脱位;胸椎骨折;多处挫伤;特发性(原发性)高血压;具有心脏起搏器;腔隙性脑梗死;老年性脑萎缩;肺部感染;先天性肺大泡;肺肿物;后天性肾囊肿;前列腺增生;前列腺结石;创伤性胸腔积液	治愈	武垚森	武垚森	武垚森	前入路颈椎融合术;颈椎间盘切除伴椎管减压术;金属脊椎融合物置入术;2-3个椎骨融合或再融合;颈椎植骨术
15249	O211脊柱外科	2024-11-25	2024-12-01	3574675	白金萍	2	71Y	胸椎压缩性骨折	腰椎间盘突出;骨质疏松;腰椎退行性病变;胸椎退行性病变	治愈	田乃锋	田乃锋	田乃锋	胸椎骨折球囊扩张成形术;经皮椎骨成形术
15250	O211脊柱外科	2024-11-27	2024-12-03	3575409	郑春叶	2	63Y	腰椎骨折	腰椎退行性病变;胸椎退行性病变;孤立性肺结节;脂肪肝	治愈	林焱	田乃锋	吴周士	腰椎骨折球囊扩张成形术;经皮椎骨成形术
15251	O211脊柱外科	2024-11-26	2024-12-03	3575410	葛聪菊	2	68Y	腰椎压缩性骨折	骨质疏松;胸椎退行性病变;2型糖尿病;肾挛缩;后天性肾囊肿;间质性肺病;肝回声不均;肝内钙化点;腰椎退行性病变	治愈	武垚森	武垚森	武垚森	腰椎骨折球囊扩张成形术;椎骨活组织检查
15252	O211脊柱外科	2024-11-27	2024-12-03	3575447	姜芳妹	2	86Y	骨质疏松伴有病理性骨折，其他的	腰椎骨折L2;胸椎退行性病变;胸椎骨折T7/T8;老年性心脏瓣膜病;胆总管扩张;后天性肾囊肿;腰椎退行性病变	好转	武垚森	武垚森	武垚森	腰椎骨折球囊扩张成形术;椎骨活组织检查
15253	O211脊柱外科	2024-11-24	2024-12-03	3575457	何显旺	1	52Y	取除骨折内固定装置	骨折术后;肺肿物;脂肪肝	其他	林焱	田乃锋	田乃锋	椎骨内固定物取出术;桡骨内固定装置去除术
15254	O211脊柱外科	2024-11-30	2024-12-04	3575778	朱春兰	2	72Y	骨质疏松伴有病理性骨折，其他的	腰椎骨折L2;高血压;帕金森病;腰椎间盘突出;肺肿物;二尖瓣及主动脉瓣关闭不全;下肢动脉粥样硬化;下肢静脉血栓形成;脊柱侧弯;胸椎后凸	好转	盛孙仁	盛孙仁	盛孙仁	腰椎骨折球囊扩张成形术;椎骨活组织检查
15255	O211脊柱外科	2024-11-26	2024-12-04	3575792	瞿珍兰	2	56Y	腰椎骨折	骨质疏松;肋骨多处骨折;肺肿物;脂肪肝	治愈	武垚森	武垚森	武垚森	腰椎骨折球囊扩张成形术
15256	O211脊柱外科	2024-11-30	2024-12-04	3575837	徐明和	1	73Y	胸椎骨折	骨质疏松;糖尿病;腰椎间盘突出;腰椎椎管狭窄;胸腔积液;肝硬化;胆囊结石;后天性肾囊肿;输尿管结石;胸椎后凸;三根肋骨骨折不伴第一肋骨骨折;慢性肝炎;前列腺结石;前列腺增生	好转	盛孙仁	盛孙仁	盛孙仁	胸椎骨折球囊扩张成形术;椎骨活组织检查
15257	O211脊柱外科	2024-11-30	2024-12-05	3576272	张筱琴	2	58Y	腰椎骨折L1	头皮挫伤;高脂血症;脂肪肝;肝囊肿;肺肿物	好转	林焱	田乃锋	吴周士
15258	O211脊柱外科	2024-11-09	2024-12-05	3576273	陈臣香	2	71Y	胸椎骨折T7/T8	高血压;2型糖尿病;肺肿物;下肢动脉粥样硬化	好转	林焱	田乃锋	吴周士	胸椎骨折球囊扩张成形术;经皮椎骨成形术;脊髓硬膜外分流术
15259	O211脊柱外科	2024-11-26	2024-12-05	3576373	黄建林	1	52Y	腰椎骨折	腰椎间盘突出;2型糖尿病;肺肿物;肝囊肿;前列腺增生	治愈	林焱	田乃锋	吴周士	腰椎椎体间融合术，后入路;金属脊椎融合物置入术;金属脊椎融合物置入术;2-3个椎骨融合或再融合;黄韧带部分切除术
15260	O211脊柱外科	2024-11-13	2024-12-07	3576662	戴胜杰	1	52Y	颈部脊髓损伤	颈椎间盘突出;颈椎椎管狭窄;肱骨近端骨折;颈椎术后;脊柱侧弯;肺肿物;肺大疱;后天性肾囊肿;前列腺结石	好转	盛孙仁	盛孙仁	盛孙仁	颈椎后路单开门椎管减压术;肱骨骨折切开复位钢板内固定术;椎骨内固定术
15261	O211脊柱外科	2024-11-29	2024-12-08	3577158	李俊祥	1	37Y	腰椎骨折	颈椎退行性病变;肺挫伤;二尖瓣反流;脂肪肝;腰椎退行性病变	治愈	武垚森	武垚森	武垚森	腰椎骨折切开复位内固定术
15262	O211脊柱外科	2024-12-03	2024-12-08	3577244	卢爱菊	2	80Y	胸椎骨折	特发性(原发性)高血压;帕金森病;老年性骨质疏松;泌尿道感染;肺部感染;腰椎间盘突出;脊椎退行性病变;退行性主动脉瓣疾患;睡眠障碍;后天性肾囊肿;动脉粥样硬化;二尖瓣反流	好转	武垚森	王胜	王胜	胸椎骨折球囊扩张成形术;椎骨活组织检查
15263	O211脊柱外科	2024-11-30	2024-12-08	3577265	吴春燕	2	46Y	取除骨折内固定装置	胸椎术后;剖宫产个人史	其他	林焱	田乃锋	田乃锋	椎骨内固定物取出术
15264	O211脊柱外科	2024-11-23	2024-12-08	3577272	季庆良	1	68Y	腰椎骨折	胸椎骨折;骨质疏松;脂肪肝;后天性肾囊肿	好转	毛方敏	毛方敏	潘翔翔	腰椎骨折切开复位内固定术
15265	O211脊柱外科	2024-12-05	2024-12-09	3577732	李玉香	2	64Y	腰椎骨折	胸椎退行性病变;腰椎退行性病变;高血压病1级（低危）;肺肿物;脑缺血灶;肺肿物	治愈	林焱	田乃锋	田乃锋	腰椎骨折球囊扩张成形术;椎骨活组织检查
15266	O211脊柱外科	2024-12-06	2024-12-10	3577992	陈梅英	2	82Y	骨质疏松伴有病理性骨折，其他的	腰椎压缩性骨折;胸椎退行性病变;腰椎退行性病变;退行性主动脉瓣疾患;胆囊切除术后状态;肺诊断性影像异常;肾盂积水，其他的;甲状腺术后	好转	林焱	田乃锋	田乃锋	腰椎骨折球囊扩张成形术;椎骨活组织检查
15267	O211脊柱外科	2024-12-08	2024-12-10	3578094	朱云飞	1	50Y	排尿困难	小脑萎缩;脊椎退行性病变;陈旧性腰椎骨折;后天性肾囊肿;前列腺增生;上颌窦筛窦炎	好转	武垚森	武垚森	武垚森
15268	O211脊柱外科	2024-11-30	2024-12-10	3578157	林荣福	1	65Y	多发性腰椎骨折	肌腱和肌肉损伤;糖尿病;脂肪肝;前列腺增生;后天性肾囊肿;前列腺结石;清创术后	好转	毛方敏	毛方敏	潘翔翔
15269	O211脊柱外科	2024-12-02	2024-12-10	3578181	吴春亮	1	80Y	胸椎压缩性骨折	腰椎退行性病变;腰椎前移;脂肪肝;后天性肾囊肿;主动脉瓣关闭不全;特发性(原发性)高血压;脑卒中后遗症	治愈	林焱	田乃锋	田乃锋	胸椎骨折球囊扩张成形术;椎骨活组织检查
15270	O211脊柱外科	2024-11-30	2024-12-11	3578410	虞华芬	2	69Y	腰椎骨折L1	胸椎棘突骨折;老年性骨质疏松;内踝骨折;腰椎椎管狭窄;腰椎间盘突出;肾结石;乳腺术后;肺肿物;创伤性胸腔积液;乳腺恶性肿瘤	好转	盛孙仁	盛孙仁	盛孙仁	腰椎骨折切开复位内固定术
15271	O211脊柱外科	2024-12-04	2024-12-11	3578411	胡员元	1	45Y	取除骨折内固定装置	脂肪肝	其他	王向阳	盛孙仁	盛孙仁	脊柱内固定装置去除术
15272	O211脊柱外科	2024-12-04	2024-12-11	3578413	詹玉卓	1	80Y	腰椎间盘突出	肝囊肿;后天性肾囊肿;下肢动脉粥样硬化;支气管扩张(症);脊柱侧弯;陈旧性腰椎骨折;腹股沟术后;颈椎术后;阑尾术后	好转	毛方敏	毛方敏	潘翔翔
15273	O211脊柱外科	2024-12-10	2024-12-11	3578627	谢丐香	2	84Y	骨质疏松伴有病理性骨折，其他的	帕金森病;人工膝关节;下肢动脉粥样硬化;下肢静脉曲张;胸椎后凸;胸椎术后;陈旧性肋骨骨折;腰椎骨折	未愈	盛孙仁	盛孙仁	盛孙仁
15274	O211脊柱外科	2024-11-30	2024-12-11	3578630	陈金定	1	78Y	腰椎间盘突出	腰椎椎管狭窄;颈椎病;颈椎间盘突出;痛风;后天性肾囊肿;颈椎椎管狭窄;陈旧性腰椎骨折;陈旧性胸椎骨折	好转	毛方敏	毛方敏	潘翔翔	经椎间孔入路腰椎体融合术;2-3个椎骨融合或再融合;黄韧带部分切除术;腰椎间盘切除伴椎管减压术;金属脊椎融合物置入术;腰椎植骨术;脊髓和神经根粘连的松解术
15275	O211脊柱外科	2024-12-08	2024-12-12	3578958	张兆兰	1	93Y	骨质疏松伴有病理性骨折，其他的	胸椎压缩性骨折;消化道出血;冠状动脉粥样硬化性心脏病;腔隙性脑梗死;泌尿道感染;肺诊断性影像异常;创伤性胸腔积液;肺气肿;肝囊肿;胆囊结石;后天性肾囊肿;肾结石;膀胱结石;膀胱憩室;前列腺增生;甲状腺结节;下肢动脉粥样硬化;腰椎退行性病变	好转	林焱	田乃锋	田乃锋	胸椎骨折球囊扩张成形术;椎骨活组织检查
15276	O211脊柱外科	2024-12-07	2024-12-12	3578972	刘银柱	1	75Y	胸椎压缩性骨折	腰椎间盘变性;痛风;脂肪肝;肾结石;前列腺结石;肺部感染;下肢静脉肌间血栓形成	治愈	林焱	田乃锋	田乃锋	胸椎骨折球囊扩张成形术;椎骨活组织检查
15277	O211脊柱外科	2024-12-07	2024-12-12	3578985	王凤花	2	73Y	骨质疏松伴有病理性骨折，其他的	腰椎压缩性骨折;腰椎退行性病变;胸椎退行性病变;肺肿物;肾盂积水;下肢静脉血栓形成;骨折术后	好转	林焱	田乃锋	田乃锋	腰椎骨折球囊扩张成形术;椎骨活组织检查
15278	O211脊柱外科	2024-12-07	2024-12-12	3578987	项有本	1	73Y	腰椎压缩性骨折	腰骶椎间盘突出;肺部感染;喉恶性肿瘤个人史;鼻窦炎;胸椎退行性病变;肺肿物;喉术后	治愈	林焱	田乃锋	田乃锋	腰椎骨折球囊扩张成形术;椎骨活组织检查
15279	O211脊柱外科	2024-12-05	2024-12-13	3579379	胡荣平	1	48Y	腰椎骨折L1	椎管内蛛网膜囊肿;脂肪肝;肾结石;前列腺增生;前列腺结石	治愈	林焱	田乃锋	田乃锋	腰椎骨折切开复位内固定术;腰椎植骨术
15280	O211脊柱外科	2024-11-02	2024-12-13	3579438	叶信钤	1	76Y	胸椎压缩性骨折	腰椎间盘突出;脊柱侧弯;弥漫性特发性骨肥厚[DISH病];脊柱后凸;肺肿物;后天性肾囊肿;下肢动脉粥样硬化;脊椎退行性病变	治愈	王向阳	盛孙仁	盛孙仁	胸椎骨折切开复位内固定术;胸椎植骨术
15281	O211脊柱外科	2024-12-06	2024-12-14	3579563	陈雨香	2	86Y	胸椎压缩性骨折	尺骨远端骨折伴桡骨远端骨折;骨折术后;糖尿病;脂肪肝;后天性肾囊肿	治愈	林焱	田乃锋	田乃锋	桡骨骨折闭合复位螺钉内固定术;椎骨活组织检查;胸椎骨折球囊扩张成形术
15282	O211脊柱外科	2024-12-09	2024-12-14	3579564	王炳荣	1	71Y	腰椎骨折L2	腰椎退行性病变;肺部感染;高血压;创伤性胸腔积液;肾结石;肺诊断性影像异常;脂肪肝;后天性肾囊肿;胸椎退行性病变	治愈	林焱	田乃锋	田乃锋	腰椎骨折球囊扩张成形术;椎骨活组织检查
15283	O211脊柱外科	2024-12-09	2024-12-14	3579921	陈相村	1	70Y	胸椎压缩性骨折	老年性骨质疏松;胸椎间盘突出;腰椎间盘突出;腹股沟术后;肺肿物;肾结石;前列腺囊肿;肝囊肿;陈旧性腰椎骨折;陈旧性胸椎骨折	治愈	王向阳	盛孙仁	盛孙仁	胸椎骨折球囊扩张成形术;经皮椎骨成形术;椎骨活组织检查
15284	O211脊柱外科	2024-12-04	2024-12-15	3580111	刘秘中	1	59Y	胸椎多处骨折	多发性腰椎骨折;肋骨多处骨折;多处挫伤;脊椎退行性病变;创伤性气胸;坠积性肺炎;陈旧性肺结核;肺气肿;肝钙化灶	好转	武垚森	王胜	王胜	胸椎骨折切开复位内固定术;胸椎椎板切除减压术;黄韧带部分切除术;胸椎植骨术
15285	O211脊柱外科	2024-12-12	2024-12-16	3580410	李吴斌	1	25Y	取除骨折内固定装置	脂肪肝	其他	林仲可	王胜	林仲可	脊柱内固定装置去除术
15286	O211脊柱外科	2024-12-13	2024-12-16	3580412	徐君叶	2	74Y	胸椎压缩性骨折	腰椎前移;老年性骨质疏松;腰椎间盘突出;脊柱侧弯;胸椎后凸;高血压;创伤性胸腔积液;肺肿物	好转	王向阳	盛孙仁	盛孙仁	胸椎骨折球囊扩张成形术;椎骨活组织检查
15287	O211脊柱外科	2024-12-09	2024-12-16	3580433	黄洪娟	2	76Y	肿瘤性病理性骨折	腰椎骨折L2;髋关节恶性肿瘤;胸椎骨折T7/T8;脊柱血管瘤;胸椎退行性病变;腰椎退行性病变;肺肿物;肾错构瘤;后天性肾囊肿;脂肪肝;腰椎术后	治愈	林焱	林焱	田乃锋	腰椎骨折球囊扩张成形术;胸椎骨折球囊扩张成形术;椎骨活组织检查
15288	O211脊柱外科	2024-12-01	2024-12-16	3580436	王良全	1	61Y	颈部脊髓损伤	颈椎多发性骨折;截瘫;颈椎脱位;后天性肾囊肿;心功能不全	治愈	毛方敏	毛方敏	潘翔翔	前入路颈椎融合术;颈椎前路椎管减压术;颈椎间盘切除伴椎管减压术;金属脊椎融合物置入术;颈椎植骨术;颈椎骨折切开复位内固定术;2-3个椎骨融合或再融合;椎骨内固定术
15289	O211脊柱外科	2024-12-11	2024-12-16	3580465	黄锦美	2	72Y	骨质疏松伴有病理性骨折，其他的	胸椎压缩性骨折;帕金森病;肺部感染;胆囊结石;肺肿物;腰椎退行性病变;胸椎退行性病变;老年性脑萎缩;脑梗死个人史;陈旧性腰椎骨折;陈旧性胸椎骨折	好转	林焱	田乃锋	田乃锋	胸椎骨折球囊扩张成形术;椎骨活组织检查
15290	O211脊柱外科	2024-12-05	2024-12-16	3580481	周忠柳	1	44Y	胸椎骨折	胸椎退行性病变;腰椎退行性病变;前列腺增生	治愈	林焱	田乃锋	田乃锋	胸椎骨折切开复位内固定术;胸椎植骨术
15291	O211脊柱外科	2024-11-01	2024-12-16	3580584	陈玉娇	2	85Y	椎体感染	老年性骨质疏松;骨折术后;创伤性胸腔积液;特发性(原发性)高血压;脑卒中后遗症	好转	武垚森	武垚森	武垚森	椎骨活组织检查;腰椎穿刺术;胸椎病损切除术
15292	O211脊柱外科	2024-11-04	2024-12-16	3580621	贺红丽	2	29Y	骶骨骨折	腰骶神经损伤;腰椎骨折;髂骨骨折;腓骨头骨折;骶髂关节脱位;失血性休克;腹腔积血;开放性肠系膜血肿;腹膜后血肿;腹壁挫伤;肺挫伤;创伤性胸腔积液;创伤性气胸;膀胱挫伤;肾包膜下积液;腹腔积液;多处挫伤;肺部感染;耻骨骨折;肝囊肿	治愈	林仲可	林仲可	林仲可	骶骨骨折切开复位内固定术;髂内动脉插管术;经导管髂内动脉栓塞术;腹腔镜检查;骨盆骨折闭合复位内固定术;椎管减压术;骶椎植骨术
15293	O211脊柱外科	2024-12-13	2024-12-17	3580841	黄崇秀	2	73Y	胸椎骨折	腰椎间盘突出;腰椎椎管狭窄;肺部感染;脑梗死个人史;肾结石;肺肿物;胸椎退行性病变	治愈	林焱	田乃锋	田乃锋	胸椎骨折球囊扩张成形术;椎骨活组织检查
15294	O211脊柱外科	2024-12-14	2024-12-17	3580854	陈月华	2	70Y	腰椎压缩性骨折	骨质疏松;脊椎退行性病变;肺部感染;间质性肺病;脂肪肝;肝囊肿	治愈	武垚森	王胜	王胜	腰椎骨折球囊扩张成形术;椎骨活组织检查
15295	O211脊柱外科	2024-12-03	2024-12-17	3580887	胡克者	1	65Y	脊髓型颈椎病	颈椎间盘突出;颈椎椎管狭窄;颈部脊髓损伤;陈旧性胸椎骨折;陈旧性腰椎骨折;陈旧性肋骨骨折;糖尿病;脂肪肝;胆囊息肉;后天性肾囊肿;肺肿物;颈椎术后	好转	王向阳	盛孙仁	盛孙仁	颈椎后路单开门椎管减压术;颈椎植骨术;椎骨内固定术
15296	O211脊柱外科	2024-12-14	2024-12-18	3581432	张其花	2	73Y	骨质疏松伴有病理性骨折，其他的	腰椎退行性病变;胸椎骨折;脂肪肝;胸椎退行性病变	好转	武垚森	王胜	王胜	胸椎骨折球囊扩张成形术;椎骨活组织检查
15297	O211脊柱外科	2024-12-17	2024-12-18	3581691	陈贵真	1	74Y	病理性骨折，不可归类在他处者	脊柱继发恶性肿瘤;食管恶性肿瘤;腰椎间盘突出;腰椎退行性病变;胸椎退行性病变;高血压;副脾;脂肪肝;肝囊肿;胆囊结石;后天性肾囊肿;前列腺增生;前列腺结石;前列腺囊肿;肺肿物;肾钙化;腰椎骨折L3	好转	林焱	田乃锋	田乃锋
15298	O211脊柱外科	2024-12-15	2024-12-19	3581733	叶和平	1	59Y	腰椎骨折	创伤性胸腔积液;肺挫伤;胸腔积液;脊椎退行性病变;特发性(原发性)高血压;肾结石;慢性肝病;肝钙化灶;脂肪肝;前列腺增生;前列腺结石	治愈	武垚森	武垚森	武垚森	椎骨活组织检查;腰椎骨折球囊扩张成形术
15299	O211脊柱外科	2024-12-05	2024-12-19	3581734	陈文强	1	47Y	腰椎骨折	腰椎椎管狭窄;大腿多处浅表损伤;大腿后部肌腱损伤;阴囊开放性损伤;大腿坐骨神经损伤;肋骨多处骨折	好转	毛方敏	毛方敏	潘翔翔	腰椎骨折切开复位内固定术
15300	O211脊柱外科	2024-12-15	2024-12-19	3581744	刘兰英	2	66Y	骨质疏松伴有病理性骨折，其他的	胸椎骨折;胸椎退行性病变;腰椎退行性病变;腰椎间盘突出;高血压;脂肪肝;后天性肾囊肿	好转	林焱	田乃锋	田乃锋	胸椎骨折球囊扩张成形术;椎骨活组织检查
15301	O211脊柱外科	2024-12-10	2024-12-19	3581747	叶阿珍	2	86Y	骨质疏松伴有病理性骨折，其他的	胸椎压缩性骨折;陈旧性腰椎骨折;特发性(原发性)高血压;冠状动脉粥样硬化性心脏病;子宫术后;陈旧性股骨骨折;胸椎退行性病变;腰椎退行性病变;后天性肾囊肿;陈旧性胸椎骨折	好转	林焱	田乃锋	田乃锋	胸椎骨折球囊扩张成形术;椎骨活组织检查
15302	O211脊柱外科	2024-12-15	2024-12-20	3582121	周钗花	2	69Y	腰椎骨折L3	老年性骨质疏松;肱骨大结节骨折;腓骨骨折;胸椎退行性病变;腰椎退行性病变	治愈	林焱	田乃锋	田乃锋	腰椎骨折球囊扩张成形术;肱骨骨折切开复位内固定术;肩袖修补术;椎骨活组织检查
15303	O211脊柱外科	2024-12-16	2024-12-21	3582269	金孝波	1	92Y	胸椎骨折	慢性支气管炎;老年性骨质疏松;慢性阻塞性肺疾病IV级;心房颤动;室性期前收缩;特发性(原发性)高血压;前列腺增生	好转	武垚森	武垚森	武垚森	胸椎骨折球囊扩张成形术;椎骨活组织检查
15304	O211脊柱外科	2024-12-15	2024-12-21	3582274	郑崇和	1	67Y	腰椎压缩性骨折	骨质疏松;脊柱血管瘤;腰椎间盘突出;高血压;痛风;后天性肾囊肿;肾结石;肺大疱	好转	王向阳	盛孙仁	孙泽明	腰椎骨折球囊扩张成形术;椎骨活组织检查
15305	O211脊柱外科	2024-12-16	2024-12-21	3582495	陈秀芬	2	46Y	取除骨折内固定装置	由于其他原因而未进行操作;骨折术后;腰椎退行性病变;胸椎退行性病变;甲状腺囊肿;乳房纤维囊性乳腺病;肝血管瘤;肺肿物	其他	林焱	田乃锋	田乃锋
15306	O211脊柱外科	2024-12-17	2024-12-21	3582649	董金香	2	72Y	腰椎前移	腰椎椎管狭窄;腰椎间盘突出;胸椎压缩性骨折;脊柱侧弯;肋骨骨折;颈椎术后;胆囊切除术后状态;肾上腺脂肪瘤;后天性肾囊肿;肺肿物;脂肪肝	未愈	王向阳	盛孙仁	孙泽明
15307	O211脊柱外科	2024-12-07	2024-12-22	3581811	郑林英	2	55Y	骨盆骨折	耻骨骨折;髂骨骨折;腰椎退行性病变;腰椎间盘突出;胸椎退行性病变;脂肪肝	好转	毛方敏	毛方敏	潘翔翔
15308	O211脊柱外科	2024-12-17	2024-12-22	3582677	李春兰	2	70Y	骨质疏松伴有病理性骨折，其他的	腰椎压缩性骨折;腰椎间盘突出;腰椎术后;矽肺	好转	王向阳	盛孙仁	孙泽明	腰椎骨折球囊扩张成形术;椎骨活组织检查
15309	O211脊柱外科	2024-12-16	2024-12-22	3582678	杨彩菊	2	66Y	胸椎压缩性骨折	腰椎间盘突出;骨质疏松;2型糖尿病;肾结石;后天性肾囊肿	好转	王向阳	盛孙仁	孙泽明	胸椎骨折球囊扩张成形术;椎骨活组织检查
15310	O211脊柱外科	2024-11-20	2024-12-22	3582737	郑小彩	2	72Y	取除骨折内固定装置	皮肤感染;心功能不全;糖尿病;老年性骨质疏松;肺肿物;脂肪肝;腰椎术后;腰椎间盘突出	其他	毛方敏	毛方敏	潘翔翔	脊柱内固定装置去除术;皮肤和皮下坏死组织切除清创术;创面封闭式负压引流术（VSD)
15311	O211脊柱外科	2024-12-16	2024-12-22	3582913	邱如绿	2	60Y	骨质疏松伴有病理性骨折，其他的	胸椎压缩性骨折;腰椎间盘突出;脊柱血管瘤;高血压;后天性肾囊肿;脂肪肝;肺大疱;肺肿物;腔隙性脑梗死	好转	盛孙仁	盛孙仁	孙泽明	胸椎骨折球囊扩张成形术;椎骨活组织检查
15312	O211脊柱外科	2024-12-03	2024-12-22	3583002	陈叶如	2	67Y	骨质疏松伴有病理性骨折，其他的	腰椎骨折;腰椎退行性病变;腰椎间盘突出;帕金森病;特发性(原发性)高血压	好转	武垚森	武垚森	武垚森	腰椎骨折切开复位内固定术
15313	O211脊柱外科	2024-12-09	2024-12-23	3583412	吴国平	1	56Y	腰椎良性肿瘤	腰椎间盘突出;腰椎滑脱;陈旧性腰椎骨折;脊柱侧弯;骨质疏松;腰椎术后;后天性肾囊肿;腰椎峡部裂	治愈	王向阳	盛孙仁	孙泽明	腰椎病损切除术;椎骨内固定术;黄韧带部分切除术;腰椎植骨术;硬脊膜修补术;腰椎椎板切除减压术
15314	O211脊柱外科	2024-12-17	2024-12-24	3583551	谢德利	1	60Y	取除骨折内固定装置	前列腺增生;前列腺结石;肺大疱;主动脉弓钙化;老年性心脏瓣膜病	其他	武垚森	王胜	王胜	脊柱内固定装置去除术
15315	O211脊柱外科	2024-12-17	2024-12-24	3583552	戴春花	2	98Y	骨质疏松伴有病理性骨折，其他的	腰椎楔形变;胸椎骨折;脊椎退行性病变;颈椎间盘突出;陈旧性肺结核;肺钙化;二尖瓣钙化;主动脉钙化;胸椎术后;腰椎术后;淋巴结钙化	好转	武垚森	武垚森	武垚森	胸椎骨折球囊扩张成形术;椎骨活组织检查
15316	O211脊柱外科	2024-12-14	2024-12-24	3583559	王秀芳	2	49Y	胸椎压缩性骨折	尾骨骨折;骨质疏松;脊椎退行性病变;肺肿物;肾结石	治愈	武垚森	武垚森	武垚森	胸椎骨折切开复位内固定术
15317	O211脊柱外科	2024-12-21	2024-12-25	3584087	周冬菊	2	75Y	腰椎压缩性骨折	骨质疏松;腰椎退行性病变;高血压;血管炎;肺大疱;腰椎椎管狭窄;腰椎间盘突出;下肢动脉粥样硬化;胆囊结石;后天性肾囊肿;心功能不全	好转	毛方敏	毛方敏	潘翔翔	腰椎骨折球囊扩张成形术
15318	O211脊柱外科	2024-12-21	2024-12-25	3584114	肖冬兰	2	69Y	骨质疏松伴有病理性骨折，其他的	腰椎压缩性骨折;陈旧性胸椎骨折;胸椎间盘突出;腰椎前移;肺肿物;脂肪肝;肾结石	好转	王向阳	盛孙仁	孙泽明	腰椎骨折球囊扩张成形术;椎骨活组织检查
15319	O211脊柱外科	2024-12-14	2024-12-25	3584199	包文林	1	53Y	胸椎骨折	腰椎退行性病变;骨质疏松;脂肪肝;胆囊息肉;胆囊结石;肾结石	治愈	武垚森	武垚森	武垚森	胸椎骨折切开复位内固定术;胸椎椎板切除减压术;椎管减压术;黄韧带部分切除术;胸椎植骨术
15320	O211脊柱外科	2024-12-18	2024-12-26	3584542	陈碎娟	2	49Y	寰枢椎脱位	颈椎椎管狭窄;颈部脊髓损伤;肺肿物;脊柱侧弯;陈旧性颈椎骨折	未愈	王向阳	盛孙仁	孙泽明
15321	O211脊柱外科	2024-12-23	2024-12-27	3584846	程玉兰	2	71Y	骨质疏松伴有病理性骨折，其他的	腰椎骨折L1;胸椎退行性病变;腰椎退行性病变;陈旧性胸椎骨折;后天性肾囊肿	好转	林焱	田乃锋	田乃锋	腰椎骨折球囊扩张成形术;椎骨活组织检查
15322	O211脊柱外科	2024-12-23	2024-12-27	3584848	朱春娥	2	67Y	腰椎骨折L1	胸椎退行性病变;腰椎退行性病变;骨质疏松;食管恶性肿瘤个人史;肾结石;骨折术后	治愈	林焱	田乃锋	田乃锋	腰椎骨折球囊扩张成形术;椎骨活组织检查
15323	O211脊柱外科	2024-12-21	2024-12-27	3584865	林志龙	1	64Y	腰椎间盘突出	腰椎退行性病变;骨折术后;高血压;咳嗽;肺肿物;前列腺增生;前列腺结石	治愈	林焱	田乃锋	田乃锋	内镜下腰椎髓核切除术;经皮椎间盘电热纤维环成形术(IDET);脊髓神经根粘连松解术;黄韧带部分切除术
15324	O211脊柱外科	2024-12-21	2024-12-27	3584925	潘岳英	2	73Y	腰椎骨折	胸椎楔形变;腰椎楔形变;腰椎退行性病变;骨质疏松;糖尿病;高血压;胆囊结石;后天性肾囊肿	治愈	武垚森	武垚森	武垚森	腰椎骨折球囊扩张成形术
15325	O211脊柱外科	2024-12-14	2024-12-28	3585049	武金鱼	2	68Y	腰椎间盘突出	脊柱侧弯;肺大疱;下肢动脉粥样硬化;下肢静脉肌间血栓形成;陈旧性胸椎骨折;眩晕;腰椎不稳定;老年性骨质疏松	好转	王向阳	盛孙仁	孙泽明	腰椎间盘切除伴椎板切除术;金属脊椎融合物置入术;腰椎椎体间融合术，后入路;2-3个椎骨融合或再融合;脊髓神经根粘连松解术;黄韧带部分切除术;腰椎植骨术
15326	O211脊柱外科	2024-12-18	2024-12-28	3585179	戴冬梅	2	51Y	腰椎压缩性骨折	多发性肝囊肿;后天性肾囊肿;先天性肺大泡	治愈	林焱	田乃锋	田乃锋	腰椎骨折切开复位内固定术
15327	O211脊柱外科	2024-12-18	2024-12-28	3585181	叶小华	2	58Y	腰椎骨折L2	骨质疏松;胸腔积液;肝囊肿	好转	王向阳	盛孙仁	孙泽明	腰椎骨折切开复位内固定术;腰椎植骨术
15328	O211脊柱外科	2024-12-21	2024-12-28	3585202	高娥英	2	56Y	腰椎骨折L1	腰椎退行性病变;腰椎间盘突出;胸椎退行性病变;上颌窦炎;脂肪肝	治愈	林焱	田乃锋	田乃锋	腰椎骨折切开复位内固定术
15329	O211脊柱外科	2024-12-16	2024-12-28	3585235	余坚定	1	48Y	胸椎压缩性骨折	骨质疏松;肾积水伴肾结石;肾结石;肾错构瘤	治愈	毛方敏	毛方敏	潘翔翔	胸椎骨折切开复位内固定术
15330	O211脊柱外科	2024-12-24	2024-12-28	3585241	张美心	2	61Y	腰部挫伤	骨质疏松;陈旧性腰椎骨折;腰椎退行性病变;类风湿性关节炎;特发性(原发性)高血压;2型糖尿病;胆囊息肉;后天性肾囊肿	治愈	武垚森	武垚森	武垚森
15331	O211脊柱外科	2024-12-25	2024-12-28	3585242	倪尾丁	2	80Y	骨质疏松伴有病理性骨折，其他的	胸椎骨折;胸椎退行性病变;腰椎退行性病变;骨折术后;心功能不全;脂肪肝;后天性肾囊肿;下肢动脉粥样硬化	好转	林焱	田乃锋	田乃锋	胸椎骨折球囊扩张成形术;椎骨活组织检查
15332	O211脊柱外科	2024-12-18	2024-12-28	3585263	余建笑	1	39Y	腰椎骨折	腰椎椎管狭窄;脊髓损伤;肺肿物;脂肪肝;肾结石	好转	王向阳	盛孙仁	孙泽明	腰椎骨折切开复位内固定术;腰椎植骨术
15333	O211脊柱外科	2024-12-22	2024-12-29	3585563	林新尧	1	67Y	腰椎骨折L1	骨质疏松;特发性(原发性)高血压;2型糖尿病;脊椎退行性病变;肺肿物	治愈	武垚森	王胜	王胜	腰椎骨折切开复位内固定术
15334	O211脊柱外科	2024-12-22	2024-12-29	3585619	陈玲珠	2	47Y	取除骨折内固定装置	腰椎术后;腰椎退行性病变;肺肿物	其他	林焱	田乃锋	田乃锋	脊柱内固定装置去除术
15335	O211脊柱外科	2024-11-25	2024-12-29	3585648	张贤安	1	57Y	颈椎间盘突出	胫骨骨折;外踝骨折;内踝骨折;腓骨骨折;跟骨骨折;下肢肌腱损伤;颈部脊髓损伤;颈椎椎管狭窄;胸椎棘突骨折;颈椎退行性病变;头皮挫伤;前列腺增生;舒张性心力衰竭	好转	林焱	田乃锋	田乃锋	下肢肌腱缝合术;创面封闭式负压引流术（VSD);胫骨骨折切开复位内固定术;踝关节骨折切开复位钢板内固定术;胫骨骨折切开复位钢板内固定术;颈椎后路单开门椎管减压术;椎骨成形术;胫骨外固定术;胫骨外固定装置去除术
15336	O211脊柱外科	2024-12-25	2024-12-29	3585670	张春萍	2	65Y	骨质疏松伴有病理性骨折，其他的	胸椎压缩性骨折;腰椎间盘突出;腰椎术后;类风湿性关节炎;间质性肺炎;脂肪肝;后天性肾囊肿	好转	王向阳	盛孙仁	孙泽明	胸椎骨折球囊扩张成形术;椎骨活组织检查
15337	O211脊柱外科	2024-12-15	2024-12-29	3585673	胡义元	1	49Y	腰椎骨折L2	腰椎间盘突出;腰椎退行性病变;创伤性胸腔积液	治愈	林焱	田乃锋	田乃锋	腰椎骨折切开复位内固定术
15338	O211脊柱外科	2024-12-23	2024-12-30	3585897	李秀芬	2	72Y	骨质疏松伴有病理性骨折，其他的	胸椎骨折;腰椎骨折;骨折术后;慢性胃炎;肺肿物	好转	林仲可	林仲可	林仲可	腰椎骨折球囊扩张成形术;椎骨活组织检查
15339	O211脊柱外科	2024-12-18	2024-12-30	3585898	郑小春	2	51Y	胸椎骨折T11/T12	尾骨骨折;外踝骨折;胸椎退行性病变;腰椎退行性病变;高血压;肺肿物;脂肪肝;肝血管瘤;胆囊结石	治愈	林焱	田乃锋	田乃锋	胸椎骨折切开复位内固定术
15340	O211脊柱外科	2024-12-28	2024-12-30	3585915	徐莲红	2	68Y	腰椎前移	腰椎椎管狭窄;陈旧性胸椎骨折;骨质疏松;腰椎退行性病变;痛风;甲状腺术后;甲状腺功能减退症;甲状腺囊肿;甲状腺结节;肺肿物;脂肪肝;肝囊肿;后天性肾囊肿	未愈	林焱	田乃锋	田乃锋
15341	O211脊柱外科	2024-12-26	2024-12-30	3586282	单天浦	1	66Y	胸椎压缩性骨折	骶骨骨折;骨质疏松;特发性(原发性)高血压;多发性肝囊肿;后天性肾囊肿;前列腺增生;前列腺结石;前列腺囊肿	治愈	武垚森	王胜	王胜	胸椎骨折球囊扩张成形术;椎骨活组织检查
15342	O211脊柱外科	2024-12-26	2024-12-31	3586397	吴文妹	2	86Y	腰椎骨折	胸椎骨折;老年性骨质疏松;高血压;脑梗死后遗症;白内障;胆囊结石;后天性肾囊肿	治愈	林仲可	林仲可	林仲可	腰椎骨折球囊扩张成形术;椎骨活组织检查
15343	O211脊柱外科	2024-12-14	2024-12-31	3586404	虞美珍	2	63Y	胸椎继发恶性肿瘤	肾恶性肿瘤;肿瘤性病理性骨折;胸椎骨折;脂肪肝;高血压;肺肿物	好转	王向阳	盛孙仁	孙泽明	胸椎病损切除术;腰动脉栓塞术;肋间动脉造影;椎弓根钉内固定术;椎骨活组织检查;胸椎骨折球囊扩张成形术;胸椎椎板切除减压术;胸椎植骨术;椎管减压术
15344	O211脊柱外科	2024-12-25	2024-12-31	3586532	段建国	1	54Y	取除骨折内固定装置	脂肪肝;胆囊结石;前列腺增生;腰椎术后	其他	林焱	田乃锋	田乃锋	脊柱内固定装置去除术
15345	O211脊柱外科	2024-12-24	2024-12-31	3586536	潘才根	1	48Y	颈椎骨折	胸椎骨折;腰椎骨折;肋骨骨折;多处开放性伤口;肺挫伤;创伤性胸腔积液;腰背部挫伤;间质性肺病;脊椎退行性病变	好转	武垚森	武垚森	武垚森
15346	O303康复科	2025-03-25	2025-04-24	3495920	付中臣	1	22Y	肘关节痛	骨折术后恢复期;肘关节僵硬;瘢痕挛缩;脂肪肝;肝功能检查的异常结果;涉及使用其他康复操作的医疗	好转	蒋松鹤	林海燕2	高丽萍
15347	O303康复科	2025-03-16	2025-04-28	3496994	张建启	1	49Y	臂丛神经损伤	三角肌损伤;冈上肌肌腱损伤;肩关节盂唇损伤;肋骨骨折;累及神经和肌肉骨骼系统症状和体征;头皮开放性伤口;肺气肿合并肺大泡;颈椎退行性病变;颈椎间盘突出;胃部分后天性缺失;胃术后	好转	蒋松鹤	郑余银	邹恩苗
15348	O303康复科	2025-04-02	2025-04-29	3497276	陈国兴	1	71Y	髋关节痛	髋臼骨折;耻骨骨折;腔隙性脑梗死;肺气肿合并肺大泡;肝结节;肾结石;前列腺钙化灶;胫骨上端骨折;半月板损伤;髌韧带损伤;膝关节积液;膝关节副韧带损伤;膝关节前十字韧带损伤;涉及使用其他康复操作的医疗	好转	蒋松鹤	郑余银	高丽萍
15349	O303康复科	2025-04-02	2025-04-30	3497565	胡木茜	2	62Y	胸椎骨折T5/T6	颈椎间盘突出;脑缺血灶;锁骨下动脉粥样硬化;原发性单侧膝关节病;肝功能检查的异常结果;脂肪肝;焦虑抑郁状态;胸椎间盘突出;腰椎间盘突出;脱髓鞘性脑病;肺诊断性影像异常;涉及使用其他康复操作的医疗	好转	蒋松鹤	林海燕2	高丽萍
15350	O303康复科	2025-04-02	2025-04-30	3497630	黄瑞宽	1	45Y	肘关节痛	骨折术后恢复期;上肢撕脱伤;创伤性骨筋膜室综合征;创伤性周围神经病	好转	蒋松鹤	郑余银	邹恩苗
15351	O303康复科	2025-04-28	2025-05-06	3499083	张建启	1	49Y	臂丛神经损伤	在胸水平的肌肉和肌腱损伤;冈上肌肌腱损伤;肩关节盂唇损伤;肋骨骨折;关节僵硬;头皮开放性伤口;肺气肿合并肺大泡;颈椎退行性病变;颈椎间盘突出;胃术后	好转	蒋松鹤	郑余银	邹恩苗
15352	O303康复科	2025-04-07	2025-05-08	3499597	王文凤	1	34Y	腰部脊髓损伤	运动障碍;皮肤感觉障碍;涉及使用其他康复操作的医疗;神经源性肠;神经源性膀胱;骨折术后恢复期;腰椎术后;腰骶神经损伤;跟骨骨折;距骨骨折;高血压;窦性心动过速	好转	蒋松鹤	郑余银	邹恩苗
15353	O303康复科	2025-04-13	2025-05-11	3500219	陈德英	2	65Y	脑出血恢复期	运动障碍;脑出血后物理康复训练;高血压;2型糖尿病;下肢动脉粥样硬化;胫前动脉狭窄;肺诊断性影像异常;陈旧性肋骨骨折;心脏术后;胆囊结石;梅毒个人史;泌尿道感染	好转	蒋松鹤	林海燕2	高丽萍
15354	O303康复科	2025-04-24	2025-05-12	3500684	付中臣	1	23Y	肘关节僵硬	骨折术后恢复期;瘢痕挛缩;非酒精性脂肪性肝炎;物理治疗，其他的	好转	蒋松鹤	林海燕2	高丽萍
15355	O303康复科	2025-04-30	2025-05-16	3501859	刘雪山	1	28Y	膝关节痛	骨折术后恢复期;下肢静脉肌间血栓形成;物理治疗，其他的	好转	蒋松鹤	林海燕2	庞琼怡	运动训练;关节松动法;电针治疗;超声波治疗;针灸
15356	O303康复科	2025-04-20	2025-05-18	3502355	周玉章	1	73Y	髋关节痛	骨折术后恢复期;腰椎骨折;高血压;2型糖尿病;冠状动脉粥样硬化性心脏病;高脂血症;老年性脑萎缩;腔隙性脑梗死;肝囊肿;肾结石;单纯性牙周炎;涉及使用其他康复操作的医疗	好转	蒋松鹤	郑余银	郑余银	运动训练;物理疗法;中药熏治
15357	O303康复科	2025-04-21	2025-05-18	3502605	陈细友	1	53Y	膝关节痛	骨折术后恢复期;物理治疗，其他的;膝关节外侧副韧带损伤;髌韧带损伤;半月板损伤;膝关节积液;肋骨多处骨折;高血压	好转	蒋松鹤	郑余银	邹恩苗	运动训练;关节松动法;骨创伤治疗仪使用
15358	O303康复科	2025-04-15	2025-05-22	3503701	李永杰	1	57Y	关节痛	骨折术后恢复期;尺骨冠突骨折;胸椎压缩性骨折;肋骨骨折;肺诊断性影像异常;肝囊肿;腰椎间盘突出;腰椎退行性病变;胸椎退行性病变;下肢神经的损伤	好转	蒋松鹤	郑余银	邹恩苗	运动训练;针刺;中药熏治
15359	O303康复科	2025-04-23	2025-05-22	3503856	杨建沦	1	35Y	踝关节痛	骨折术后恢复期;面部软组织挫伤;物理治疗，其他的;跖趾关节脱位;坐骨神经损伤;四根以上肋骨骨折不伴第一肋骨骨折;面部软组织挫伤;乙型病毒性肝炎;下肢静脉肌间血栓形成	好转	蒋松鹤	郑余银	邹恩苗	针刺;运动训练;中药熏治;超声波治疗
15360	O303康复科	2025-05-16	2025-05-27	3505211	章小荣	1	47Y	颈部脊髓损伤	颈椎术后;寰椎骨折;硬膜外血肿;头皮挫伤;后天性肾囊肿;涉及使用其他康复操作的医疗	好转	蒋松鹤	郑余银	邹恩苗	针刺
15361	O303康复科	2025-04-27	2025-05-27	3505222	林扬省	1	25Y	膝关节痛	膝关节脱位;膝关节前十字韧带损伤;膝关节内侧副韧带损伤;手术后恢复期;涉及使用其他康复操作的医疗;胫骨平台骨折;腓骨头骨折;坐骨神经损伤;腓总神经损伤;脂肪肝	好转	蒋松鹤	郑余银	邹恩苗	运动训练;中药熏治;针刺
15362	O303康复科	2025-04-17	2025-05-27	3505285	朱维治	1	65Y	胸部脊髓功能损伤T12	骨折术后恢复期;运动障碍;皮肤感觉障碍;神经源性肠;神经源性膀胱;腰椎骨折;胸椎骨折;桡骨骨折;肋骨骨折;受压区压疮;肺挫伤;胸腔积液;创伤性蛛网膜下腔出血;膀胱造口状态;原发性双侧膝关节病;泌尿道感染;下肢静脉肌间血栓形成	好转	蒋松鹤	郑余银	郑力宇	骨盆外固定装置去除术;针灸;运动训练;骨创伤治疗仪使用;其他控制气压和空气成分的疗法;桡骨和尺骨置入装置去除
15363	O303康复科	2025-04-30	2025-05-29	3505935	胡木茜	2	62Y	腰椎间盘突出	腰椎退行性病变;颈椎间盘突出;胸椎骨折T5/T6;胸椎间盘突出;原发性单侧膝关节病;肝功能检查的异常结果;脂肪肝;焦虑抑郁状态;脑缺血灶;锁骨下动脉粥样硬化;肺诊断性影像异常	好转	蒋松鹤	林海燕2	高丽萍	针刺;物理疗法
15364	O303康复科	2025-05-11	2025-05-29	3505942	周查清	2	70Y	大脑动脉狭窄脑梗死	运动障碍;物理治疗，其他的;高血压;2型糖尿病;骨折术后恢复期;下肢动脉粥样硬化;颈动脉硬化;脂肪肝;锁骨下动脉粥样硬化	好转	蒋松鹤	林海燕2	高丽萍	作业疗法;关节松动法;针灸;物理疗法
15365	O303康复科	2025-04-30	2025-05-29	3505949	黄瑞宽	1	45Y	关节僵硬	骨折术后恢复期;开放性多发性前臂骨折;骨筋膜室综合征;上肢神经的损伤;上臂切断;涉及使用其他康复操作的医疗	好转	蒋松鹤	郑余银	邹恩苗	针刺;运动训练;超声波治疗;冲击波治疗
15366	O303康复科	2025-05-15	2025-05-29	3506197	郭龙龙	1	23Y	关节僵硬	骨折术后恢复期;踝距腓前韧带断裂;踝开放性伤口;踝关节积液;腹股沟挫伤;涉及使用其他康复操作的医疗	好转	蒋松鹤	林海燕2	高丽萍	运动训练;作业疗法;物理疗法;关节松动法
15367	O303康复科	2025-05-02	2025-06-01	3506741	唐启友	1	43Y	髋关节痛	骨折术后恢复期;贫血;肺诊断性影像异常	好转	蒋松鹤	林海燕2	高丽萍	运动训练;物理疗法;针灸;关节松动法
15368	O303康复科	2025-05-05	2025-06-02	3506996	张春柳	2	63Y	骨质疏松伴有病理性骨折	胸椎骨折;2型糖尿病;高血压;人工膝关节;脂肪肝;肾结石;肺结节病;高尿酸血症;高脂血症	好转	蒋松鹤	林海燕2	高丽萍	运动训练;物理疗法;针刺
15369	O303康复科	2025-05-20	2025-06-02	3507155	袁富德	1	51Y	颈椎骨折C3	腰椎骨折L1;胸椎骨折;胸椎退行性病变;腰椎间盘突出;骨质疏松;陈旧性颅骨骨折;陈旧性下肢骨折;肾结石;腰椎退行性病变	好转	蒋松鹤	林海燕2	高丽萍	运动训练;物理疗法
15370	O303康复科	2025-05-25	2025-06-03	3507409	柳火堂	1	48Y	腰部脊髓损伤	骨折术后恢复期;胸椎术后;涉及使用其他康复操作的医疗	好转	蒋松鹤	郑余银	邹恩苗	运动训练;针刺;超声波治疗
15371	O303康复科	2025-05-05	2025-06-04	3507746	张香蕊	2	70Y	颈部脊髓损伤	四肢瘫痪;神经源性肠;神经源性膀胱;运动障碍;颈椎间盘突出;颈椎骨折;颈椎椎管狭窄;颈椎后纵韧带骨化;低钾血症;低钠血症;胸腔积液;肝囊肿;下肢动脉粥样硬化;下肢静脉肌间血栓形成;泌尿道感染;涉及使用其他康复操作的医疗	好转	蒋松鹤	林海燕2	高丽萍	运动训练;作业疗法;物理疗法;针灸
15372	O303康复科	2025-04-04	2025-06-04	3507769	缪金岳	1	66Y	胸椎多处骨折	创伤性胸腔积液;多发性腰椎骨折;脊髓损伤;创伤性截瘫;脊髓病性膀胱;创伤性休克;下肢深静脉血栓形成;下肢静脉肌间血栓形成;腰部软组织损伤;创伤性湿肺;肺部感染;泌尿道感染;腔隙性脑梗死;颈椎间盘突出;腰椎间盘突出;胸椎退行性病变;骨质疏松;低蛋白血症;贫血;前列腺钙化灶	好转	蒋松鹤	林海燕2	高丽萍	针刺;物理疗法;电动起立床训练;截瘫肢体综合训练;运动训练;呼吸训练;胸椎融合术，后入路;胸椎骨折切开复位内固定术;2-3个椎骨融合或再融合;椎体脊椎融合装置的置入;呼吸机治疗[大于等于96小时];气管内插管;气管套管置换术;胸腔闭式引流术;气管镜肺泡灌洗术
15373	O303康复科	2025-05-09	2025-06-05	3508071	陈国浩	1	24Y	关节痛	骨折术后恢复期;后天性小腿缺失;髋臼骨折;耻骨骨折;骶骨骨折;肋骨骨折;髋关节半脱位;鼻骨骨折;创伤性牙破损;涉及使用其他康复操作的医疗	好转	蒋松鹤	郑余银	郑力宇	关节松动法;运动训练;低频脉冲电治疗;超声波治疗
15374	O303康复科	2025-05-12	2025-06-05	3508133	金碎华	1	77Y	颈部脊髓损伤	颈椎骨折;颈椎间盘突出;头皮血肿;胆囊结石;后天性肾囊肿;涉及使用其他康复操作的医疗	好转	蒋松鹤	郑余银	邹恩苗	运动训练;针刺
15375	O303康复科	2025-05-07	2025-06-05	3508189	马蓓蓓	2	28Y	腰椎骨折L3	骶骨骨折;胃下垂;睡眠障碍;低钾血症;胃扩张	好转	蒋松鹤	林海燕2	高丽萍	针刺;物理疗法;中药熏治
15376	O303康复科	2025-06-02	2025-06-12	3510378	王路华	1	45Y	胸椎多处骨折	多发性腰椎骨折;锁骨骨折;颈椎间盘突出;2型糖尿病;涉及使用其他康复操作的医疗	好转	蒋松鹤	郑余银	郑力宇	针灸;低频脉冲电治疗;超声波治疗
15377	O303康复科	2025-05-15	2025-06-12	3510453	张庆友	1	66Y	关节僵硬	骨折术后恢复期;涉及使用其他康复操作的医疗;桡骨远端骨折	好转	蒋松鹤	郑余银	郑力宇	关节松动法;中药熏治;低频脉冲电治疗;超声波治疗
15378	O303康复科	2025-05-13	2025-06-12	3510636	陈新武	1	36Y	膝关节痛	骨折术后恢复期;涉及使用其他康复操作的医疗;胸椎术后	好转	蒋松鹤	郑余银	郑力宇	运动训练;关节松动法;低频脉冲电治疗;超声波治疗;中药熏治
15379	O303康复科	2025-05-15	2025-06-15	3511543	王茜茜	2	24Y	关节痛	膀胱挫伤;骨折术后恢复期;涉及使用其他康复操作的医疗;取除外固定装置;盆腔积液;肺部感染;胆囊结石;手术后切口感染;肝功能检查的异常结果;膝关节积液;股骨骨折	好转	蒋松鹤	郑余银	邹恩苗	运动训练;针灸;骨盆外固定装置去除术
15380	O303康复科	2025-05-14	2025-06-16	3511665	施蒙茹	2	25Y	膝关节痛	肩胛骨骨折;足拇长伸肌腱断裂;骨折术后恢复期;涉及使用其他康复操作的医疗;下肢皮肤撕裂伤;气胸;上颌窦炎	好转	蒋松鹤	郑余银	郑力宇	关节松动法;低频脉冲电治疗;等速肌力训练
15381	O303康复科	2025-05-08	2025-06-16	3511671	王文凤	1	34Y	腰部脊髓损伤	运动障碍;皮肤感觉障碍，其他和未特指的;物理治疗，其他的;神经源性肠;神经源性膀胱;腰椎术后;骨折术后恢复期;跟骨骨折;距骨骨折;高血压;窦性心动过速;泌尿道感染;急性睾丸炎	好转	蒋松鹤	郑余银	邹恩苗	运动训练;针刺
15382	O303康复科	2025-05-22	2025-06-18	3512355	王文敏	1	29Y	关节痛	骨折术后恢复期;创伤性硬膜下出血;脑挫伤;下肢神经的损伤;物理治疗，其他的	好转	蒋松鹤	郑余银	邹恩苗	运动训练
15383	O303康复科	2025-05-02	2025-06-18	3512421	汪月霞	2	83Y	股骨颈骨折	脑梗死;乳腺恶性肿瘤;乳腺术后;高尿酸血症;桡骨远端骨折;运动障碍;下肢动脉粥样硬化;下肢静脉肌间血栓形成;腔隙性脑梗死;脱髓鞘病;老年性脑萎缩;胆囊结石;后天性肾囊肿;肾钙化;糖尿病;泌尿道感染;原发性双侧膝关节病;高血压;涉及使用其他康复操作的医疗	治愈	蒋松鹤	林海燕2	高丽萍	偏瘫肢体综合训练;运动训练;康复评定;针刺;物理疗法;人工股骨头置换术;髋轴面，金属与聚乙烯;髋关节滑膜切除术
15384	O303康复科	2025-06-02	2025-06-18	3512428	张周地	1	77Y	多发性骨盆骨折	颈椎病;髂骨骨折;具有心脏起搏器;下肢动脉粥样硬化;膀胱恶性肿瘤;膀胱术后;高血压;耻骨骨折;髂骨骨折	好转	蒋松鹤	郑余银	邹恩苗	针刺
15385	O303康复科	2025-05-27	2025-06-19	3512686	卿明泽	1	46Y	肩胛骨骨折	胸椎棘突骨折;肩关节僵硬;胸椎术后;涉及使用其他康复操作的医疗;肋骨多处骨折;胸腔积液;肝功能检查的异常结果;颈椎间盘突出;多发性肝囊肿;脂肪肝;肺诊断性影像异常;脾囊肿	好转	蒋松鹤	郑余银	邹恩苗	针灸
15386	O303康复科	2025-06-13	2025-06-19	3512761	金文购	1	42Y	颈部脊髓损伤	颈椎骨折;颈椎间盘突出;胸椎骨折;肝回声不均	好转	蒋松鹤	郑余银	邹恩苗	运动训练;针刺
15387	O303康复科	2025-05-19	2025-06-19	3512763	郑阿豪	1	34Y	腰部脊髓损伤	胸椎棘突骨折;神经源性膀胱;运动障碍;腰椎术后;神经源性肠;骨折术后恢复期;涉及使用其他康复操作的医疗;骶骨骨折;泌尿道感染	好转	蒋松鹤	郑余银	邹恩苗	运动训练;针刺
15388	O303康复科	2025-05-27	2025-06-19	3512802	吴可英	2	62Y	肘关节痛	腕关节痛;髋臼骨折;膝关节退行性病变;2型糖尿病;高脂血症;脂肪肝;肺诊断性影像异常;骨折术后恢复期	好转	蒋松鹤	林海燕2	高丽萍	作业疗法;针灸;关节松动法;物理疗法
15389	O303康复科	2025-06-09	2025-06-20	3513060	李永杰	1	57Y	关节痛	骨折术后恢复期;尺骨冠突骨折;胸椎骨折T11/T12;肋骨骨折;肺诊断性影像异常;肝囊肿;腰椎间盘突出;腰椎退行性病变;胸椎退行性病变;下肢神经的损伤;肩周炎	好转	蒋松鹤	郑余银	邹恩苗	运动训练;关节松动法;低频脉冲电治疗;超声波治疗;中药熏治;针灸
15390	O303康复科	2025-05-30	2025-06-22	3513563	潘建聪	1	39Y	踝关节痛	骨折术后恢复期;下肢皮肤缺损;腓骨骨折;肺诊断性影像异常;创伤后伤口感染	好转	蒋松鹤	郑余银	郑力宇	关节松动法;低频脉冲电治疗;超声波治疗;运动训练
15391	O303康复科	2025-05-26	2025-06-24	3514349	陈德英	2	65Y	运动障碍	脑出血恢复期;脑出血后物理康复训练;2型糖尿病;高血压;下肢动脉粥样硬化;颈动脉硬化;胫前动脉狭窄;肺诊断性影像异常;陈旧性肋骨骨折;心房颤动;胆囊结石;梅毒个人史;泌尿道感染	好转	蒋松鹤	林海燕2	高丽萍	运动训练;作业疗法;物理疗法;偏瘫肢体综合训练;电动起立床训练;平衡功能训练;针刺
15392	O303康复科	2025-06-03	2025-06-25	3514748	沈馨妍	2	13Y	膝关节痛	涉及使用其他康复操作的医疗;骨折术后恢复期	好转	蒋松鹤	郑余银	邹恩苗	运动训练;低频脉冲电治疗;关节松动法;中药熏治;超声波治疗
15393	O303康复科	2025-04-27	2025-06-26	3514898	李一红	1	41Y	骶骨骨折	髋臼骨折;耻骨骨折;坐骨骨折;膝关节僵硬;创伤后伤口感染;腰骶神经损伤	好转	蒋松鹤	郑余银	邹恩苗	盆骨外固定术;骨盆外固定装置去除术;运动训练;针灸;皮肤和皮下坏死组织切除清创术
15394	O303康复科	2025-05-29	2025-06-27	3515427	徐爱玉	2	57Y	腰椎骨折L3	耻骨骨折;运动障碍;涉及使用其他康复操作的医疗;腰椎间盘突出;混合型颈椎病;腰椎退行性病变;胸椎退行性病变;低钙血症	好转	蒋松鹤	林海燕2	高丽萍	运动训练;物理疗法;针刺
15395	O303康复科	2025-04-16	2025-06-29	3515834	徐秀玉	2	75Y	颅内损伤伴有延长的昏迷	胫骨上端骨折;肱骨上端骨折;创伤性急性硬膜下出血;创伤性蛛网膜下腔出血;脑挫伤;锁骨骨折;胸骨骨折;肋骨骨折;髂骨骨折;髋臼骨折;骶骨骨折;耻骨骨折;颈椎骨折C4;创伤性气胸;肺挫伤;创伤性皮下气肿;肺部感染;创伤性胸腔积液;腹腔积液;高血压;泌尿道感染;下肢动脉粥样硬化	好转	蒋松鹤	林海燕2	高丽萍	呼吸机治疗[大于等于96小时];胫骨骨折闭合复位髓内针内固定术;肱骨骨折闭合复位髓内针内固定术;下肢静脉造影;下腔静脉滤器置入术;运动训练;物理疗法;针刺;气管内插管
15396	O303康复科	2025-06-10	2025-06-30	3516052	黄稳华	1	46Y	关节痛	骨折术后恢复期;涉及使用其他康复操作的医疗;尺骨冠突骨折;多处挫伤;肝钙化灶;中度贫血	好转	蒋松鹤	郑余银	邹恩苗	运动训练;关节松动法;物理疗法
15397	O303康复科	2025-06-02	2025-07-02	3516753	董珍国	1	57Y	运动障碍	颈部脊髓损伤;四肢瘫痪;神经源性膀胱;附睾炎;颈椎间盘突出;颈椎退行性病变;肋骨骨折;面部软组织挫伤;高血压;2型糖尿病;低钠血症;多发性脑梗死;肺大疱;胆囊结石;下肢动脉粥样硬化;颈椎椎管狭窄	好转	蒋松鹤	林海燕2	吴登敏	运动训练;作业疗法;针刺;电动起立床训练;物理疗法
15398	O303康复科	2025-06-04	2025-07-02	3516904	朱朝均	1	51Y	创伤性硬脑膜外血肿	肺部感染;肝功能不全;创伤性硬脑膜下血肿;锁骨骨折;三根肋骨骨折不伴第一肋骨骨折;脑干挫伤;肋骨骨折;耳损伤;颞骨骨折;低钠血症;低钙血症;肺诊断性影像异常;小细胞低色素性贫血;痛风	治愈	蒋松鹤	林海燕2	高丽萍	颅内血肿清除术;颅骨去骨瓣减压术;锁骨骨折切开复位钢板内固定术;气管内插管;呼吸机治疗[小于96小时];运动训练;电动起立床训练;针刺;物理疗法
15399	O303康复科	2025-06-10	2025-07-03	3517069	林碎芬	2	56Y	腰椎骨折L1	腰部脊髓损伤;排尿困难;排便困难;腰椎退行性病变;腰骶椎间盘突出;高血压;泌尿道感染	好转	蒋松鹤	郑余银	邹恩苗	腰椎骨折切开复位内固定术;针刺;物理疗法
15400	O303康复科	2025-06-15	2025-07-03	3517316	孙坚	1	40Y	膝关节痛	髌骨骨折;髌韧带损伤;肠系膜动脉损伤;肠系膜损伤;肾结石;骨折术后恢复期;涉及使用其他康复操作的医疗	好转	蒋松鹤	郑余银	郑力宇	运动训练;关节松动法;低频脉冲电治疗;超声波联合治疗
15401	O303康复科	2025-06-19	2025-07-06	3518092	王为挺	1	28Y	腰椎骨折L1	腰部脊髓损伤;腰椎椎管狭窄;脊髓病性膀胱;神经源性肠;泌尿道感染;肝功能检查的异常结果;高尿酸血症;痛风;胸腔积液;不完全性瘫痪	好转	蒋松鹤	林海燕2	吴登敏	腰椎骨折切开复位内固定术;运动训练;截瘫肢体综合训练;物理疗法;针灸;中药熏治;腰椎人工骨植骨术
15402	O303康复科	2025-05-08	2025-07-06	3518188	王佩秋	2	70Y	膝关节僵硬	胫骨平台伴腓骨骨折;股骨内髁骨折;膝内侧半月板损伤;膝关节外侧副韧带损伤;膝关节前十字韧带损伤;膝关节内侧副韧带损伤;大腿血肿;膝关节退行性病变;膝关节积液;下肢静脉肌间血栓形成;下肢动脉粥样硬化	好转	蒋松鹤	郑余银	邹恩苗	运动训练;关节松动法;物理疗法
15403	O303康复科	2025-06-23	2025-07-06	3518207	谢作胜	1	45Y	髋关节痛	骨折术后恢复期;股骨粗隆间骨折;胆囊息肉	好转	蒋松鹤	郑余银	邹恩苗	运动训练;关节松动法
15404	O303康复科	2025-06-08	2025-07-07	3518430	刘志发	1	23Y	膝关节僵硬	骨折术后恢复期;膝关节前十字韧带损伤;涉及使用其他康复操作的医疗;股骨髁骨折	好转	蒋松鹤	郑余银	郑力宇	关节松动法;低频脉冲电治疗;超声波联合治疗;中药熏治
15405	O303康复科	2025-07-01	2025-07-07	3518432	张新群	2	59Y	关节痛	肱骨近端骨折;肩关节脱位;肩部损伤;骶骨骨折;髂骨骨折;髋臼骨折;耻骨骨折;高血压;肺诊断性影像异常;脂肪肝;上臂尺神经损伤	好转	蒋松鹤	郑余银	邹恩苗	运动训练;关节松动法;针刺
15406	O303康复科	2025-06-29	2025-07-13	3520873	江佳益	1	14Y	关节痛	膝以上大腿后天性缺失;肌腱和肌肉损伤;骶骨骨折;涉及使用其他康复操作的医疗	好转	蒋松鹤	郑余银	郑力宇	运动训练;电动起立床训练
15407	O303康复科	2025-06-14	2025-07-14	3521110	田代伍	1	52Y	髋关节痛	骨折术后恢复期;脂肪肝;前列腺结石;高血压;下肢静脉肌间血栓形成	好转	蒋松鹤	郑余银	邹恩苗	运动训练;关节松动法;物理疗法
15408	O303康复科	2025-06-16	2025-07-17	3522317	胡木茜	2	62Y	胸椎骨折T5/T6	胸椎间盘突出;腰椎退行性病变;腰椎间盘突出;颈椎间盘突出;原发性单侧膝关节病;非酒精性脂肪性肝炎;焦虑抑郁状态;脑缺血灶;脱髓鞘性脑病;肺诊断性影像异常;锁骨下动脉粥样硬化	好转	蒋松鹤	林海燕2	高丽萍	运动训练;物理疗法;电动起立床训练;针刺
15409	O303康复科	2025-06-17	2025-07-20	3523288	王爱梅	2	55Y	结核性脊柱后凸	脊髓空洞症;心功能不全;胸椎压缩性骨折;重度骨质疏松;腰椎间盘突出;胸椎退行性病变;腰椎退行性病变;肾结石;脂肪肝;皮下结节;肺钙化	治愈	蒋松鹤	林海燕2	高丽萍	胸椎植骨术;椎骨截骨术;椎弓根钉内固定术;胸椎间盘切除伴椎板切除术;电动起立床训练;针刺;物理疗法
15410	O303康复科	2025-06-19	2025-07-20	3523291	卢庆奇	1	45Y	运动障碍	脊髓损伤;排尿困难;排便困难;腰椎骨折;骨折术后恢复期;腰椎间盘突出;泌尿道感染;椎管内血管瘤;肝血管瘤	好转	蒋松鹤	林海燕2	吴登敏	运动训练;电动起立床训练;物理疗法;针灸;中药熏治
15411	O303康复科	2025-07-05	2025-07-21	3523978	袁和平	1	45Y	跟骨骨折	肝钙化灶;前列腺结石	好转	蒋松鹤	郑余银	邹恩苗	跟骨骨折切开复位钢针内固定术;运动训练;关节松动法;关节软骨修复术;跟骨人工骨植骨术
15412	O303康复科	2025-07-14	2025-07-22	3524109	潘建聪	1	39Y	关节僵硬	骨折术后恢复期;腓骨骨折;肺诊断性影像异常	好转	蒋松鹤	郑余银	郑力宇
15413	O303康复科	2025-06-22	2025-07-22	3524118	张香蕊	2	70Y	四肢瘫痪	运动障碍;颈部脊髓损伤;颈椎术后;颈椎间盘突出;颈椎骨折C7;颈椎椎管狭窄;颈椎后纵韧带骨化;肝囊肿;下肢静脉肌间血栓形成;腰椎压缩性骨折;腰骶椎间盘突出;肩胛下肌肌腱损伤;肩关节积液;肩滑囊炎;施莫尔结;冈上肌肌腱损伤;腰椎椎管狭窄	好转	蒋松鹤	林海燕2	吴登敏	偏瘫肢体综合训练;运动训练;作业疗法;电动起立床训练;物理疗法;中药熏治
15414	O303康复科	2025-07-13	2025-07-24	3524882	张金妹	2	44Y	颈部脊髓损伤	创伤性蛛网膜下腔出血;颈椎术后;胸椎术后;胸腔积液;头皮血肿;后天性指缺损;骨折术后恢复期;涉及使用其他康复操作的医疗	好转	蒋松鹤	林海燕2	高丽萍	针灸;超声波联合治疗
15415	O303康复科	2025-06-26	2025-07-24	3525028	项菊妹	2	74Y	坐骨神经损伤	膝关节僵硬;继发性双侧膝关节病;髋臼骨折;耻骨骨折;2型糖尿病;高血压;骨质疏松;涉及使用其他康复操作的医疗	好转	蒋松鹤	郑余银	邹恩苗	物理疗法;中药熏治;超声波联合治疗
15416	O303康复科	2025-06-01	2025-07-25	3525347	蔡琼	1	37Y	腰椎骨折L2	马尾损伤;跟骨骨折;髌骨骨折;肱骨大结节骨折;关节僵硬;肋骨骨折;胫骨平台伴腓骨骨折;距骨骨折;足舟骨骨折;脂肪肝;精神分裂症;下肢深静脉血栓形成;肝功能检查的异常结果;中度贫血;腰椎椎管狭窄	治愈	蒋松鹤	郑余银	郑力宇	腰椎间盘切除伴椎板切除术;腰椎椎体间融合术，前入路;腰椎骨折切开复位内固定术;腰椎骨折切开复位内固定术;腰椎椎板切除减压术;跟骨骨折切开复位钢板内固定术;跟骨人工骨植骨术;关节软骨修复术;髌骨骨折切开复位张力带钢丝内固定术;交叉韧带的其他修补术
15417	O303康复科	2025-06-30	2025-07-25	3525581	胡筱秋	2	58Y	胸椎压缩性骨折	腰痛;骨质疏松;关节痛;腕关节三角纤维软骨损伤;肩袖损伤	好转	蒋松鹤	林海燕2	高丽萍	针刺;超声波联合治疗;中药熏治;物理疗法
15418	O303康复科	2025-05-27	2025-07-27	3525985	杨中浩	1	25Y	运动障碍	神经源性膀胱;神经源性肠;马尾损伤;骨折术后恢复期;腰椎骨折;骨盆骨折;股骨骨折;跟骨骨折;跖骨骨折;足舟状骨骨折;骰骨骨折;肋骨骨折;精神分裂症;肾结石;创伤后伤口感染;泌尿道感染;涉及使用其他康复操作的医疗	好转	蒋松鹤	郑余银	郑力宇	运动训练;关节松动法
15419	O303康复科	2025-07-22	2025-07-27	3526231	陈爱桃	2	67Y	人工关节置换术后疼痛	髋关节僵硬;股骨粗隆间骨折;尺骨茎突骨折;涉及使用其他康复操作的医疗;肩胛骨骨折;胸腔积液;2型糖尿病;高血压2级;焦虑［回避］型人格障碍;后天性肾囊肿;下肢动脉粥样硬化	好转	蒋松鹤	郑余银	邹恩苗	运动训练;关节松动法
15420	O303康复科	2025-07-01	2025-07-28	3526374	曾学义	1	63Y	多发性腰椎骨折	腰椎术后;腰椎退行性病变;骨质疏松伴有病理性骨折;乙型病毒性肝炎;胸椎骨折T11/T12;骨折术后恢复期;涉及使用其他康复操作的医疗	治愈	蒋松鹤	林海燕2	高丽萍	针灸;中药熏药治疗;物理疗法
15421	O303康复科	2025-07-23	2025-07-30	3527299	徐定杰	1	37Y	踝关节痛	外踝骨折;楔状骨骨折(足);跖骨骨折;跟骨骨折;足舟骨骨折;耻骨骨折;陈旧性胫骨骨折;皮肤移植状态;特发性肺纤维化;涉及使用其他康复操作的医疗	好转	蒋松鹤	郑余银	邹恩苗	运动训练;物理疗法;超声波联合治疗
15422	O303康复科	2025-07-10	2025-07-31	3527461	郑圣潭	1	55Y	马尾损伤	腰椎术后;涉及使用其他康复操作的医疗;胫骨上端骨折;膝内侧半月板损伤;脂肪肝;下肢动脉粥样硬化;神经源性膀胱;膝关节前十字韧带损伤;膝关节外侧副韧带损伤	好转	蒋松鹤	林海燕2	高丽萍	骨创伤治疗仪使用;运动训练
15423	O303康复科	2025-06-29	2025-07-31	3527597	徐启茂	1	54Y	内踝骨折	创伤性蛛网膜下腔出血;踝关节半脱位;头皮血肿;脑血管瘤;颈椎间盘突出;特发性肺纤维化;头部的开放性伤口;脑挫伤;帕金森病;踝关节僵硬;甲状腺术后;下肢静脉肌间血栓形成	好转	蒋松鹤	郑余银	邹恩苗	关节软骨修复术;足部骨折手法整复术;运动训练;关节松动法;踝关节骨折切开复位钢板内固定术
15424	O303康复科	2025-07-23	2025-07-31	3527604	朱光松	1	52Y	踝关节痛	踝关节强硬;骨折术后恢复期;踝挫伤;肺诊断性影像异常;脂肪肝;前列腺增生;前列腺结石;涉及使用其他康复操作的医疗	好转	蒋松鹤	林海燕2	吴登敏	关节松动法;运动训练;物理疗法
15425	O303康复科	2025-07-01	2025-07-31	3527610	张庆友	1	66Y	膝关节僵硬	骨折术后恢复期;桡骨远端骨折;乳房肿块	好转	郑余银	郑余银	邹恩苗	乳房穿刺活检
15426	O303康复科	2025-07-02	2025-07-31	3527790	陈学文	1	37Y	膝关节僵硬	骨折术后恢复期;膝关节积液;前列腺结石;腘动脉狭窄;高尿酸血症;涉及使用其他康复操作的医疗	好转	蒋松鹤	林海燕2	高丽萍	中药熏药治疗;超声波联合治疗
15427	O303康复科	2025-07-06	2025-08-03	3528472	王亚风	1	29Y	肩关节僵硬	骨折术后;上臂桡神经损伤;涉及使用其他康复操作的医疗	好转	郑余银	郑余银	邹恩苗	运动训练;关节松动法
15428	O303康复科	2025-07-22	2025-08-05	3529342	缪克信	1	46Y	指关节僵硬	骨折术后恢复期;后天性单侧手指缺失;肺诊断性影像异常;脂肪肝;肝功能检查的异常结果;高脂血症;肝钙化灶;胆囊结石;涉及使用其他康复操作的医疗	好转	蒋松鹤	林海燕2	高丽萍	运动训练;手功能评估;超声波联合治疗
15429	O303康复科	2025-07-24	2025-08-07	3530160	郑爱英	2	77Y	老年性骨质疏松伴病理性骨折	腰椎压缩性骨折;脊椎前移;腰椎间盘突出;帕金森病;腰椎椎管狭窄;下肢静脉肌间血栓形成;脂肪肝;胆囊结石;后天性肾囊肿;肝结节;陈旧性胸椎骨折;脊柱骨软骨病;高血压;涉及使用其他康复操作的医疗	好转	蒋松鹤	林海燕2	高丽萍	物理疗法;运动训练
15430	O303康复科	2025-07-01	2025-08-07	3530429	施蒙茹	2	25Y	踝关节僵硬	创伤性气胸;涉及使用其他康复操作的医疗;小腿撕脱伤;足拇长伸肌腱断裂;趾伸肌腱断裂;骨折术后恢复期;肩胛骨骨折;上颌窦炎	好转	蒋松鹤	郑余银	郑力宇	关节松动法;低频脉冲电治疗;超声波联合治疗
15431	O303康复科	2025-07-13	2025-08-08	3530467	范叔通	1	33Y	关节僵硬	腓骨近端骨折;腓总神经损伤;颈部脊髓震荡;下肢皮肤缺损;胫神经损伤;皮肤移植状态;肩袖损伤;肩关节积液;肺诊断性影像异常;颈椎间盘突出;胫骨平台骨折;膝关节十字韧带断裂;髌韧带损伤;膝关节积液;涉及使用其他康复操作的医疗	好转	蒋松鹤	林海燕2	吴登敏	中厚皮片移植术;皮肤和皮下组织非切除性清创;关节松动法;运动训练;物理疗法
15432	O303康复科	2025-07-26	2025-08-09	3530855	尹清祥	1	42Y	跟骨骨折	踝关节强硬;脂肪肝;涉及使用其他康复操作的医疗	好转	蒋松鹤	郑余银	邹恩苗	跟骨骨折切开复位钢板内固定术;运动训练;关节松动法;关节软骨修复术
15433	O303康复科	2025-07-06	2025-08-11	3531560	黄兰娇	2	92Y	髋关节痛	冠状动脉粥样硬化性心脏病;骨折术后恢复期;涉及使用其他康复操作的医疗;退行性主动脉瓣疾患;二尖瓣反流;主动脉瓣关闭不全;高血压;陈旧性肋骨骨折;颈内动脉粥样硬化;多发性脑梗死;非风湿性三尖瓣关闭不全;椎动脉粥样硬化	好转	蒋松鹤	郑余银	邹恩苗	物理疗法;运动训练;关节松动法
15434	O303康复科	2025-07-03	2025-08-11	3531579	王文敏	1	30Y	下肢神经的损伤	关节僵硬;骨折术后恢复期;创伤性硬脑膜下血肿;脑挫伤;涉及使用其他康复操作的医疗;腓骨骨折	好转	蒋松鹤	郑余银	邹恩苗	运动训练;物理疗法;关节松动法
15435	O303康复科	2025-08-05	2025-08-11	3531581	林成宝	1	48Y	腰骶丛损伤	跟骨骨折;股骨骨折;腰椎骨折;肋骨骨折;胸腔积液;肝功能检查的异常结果;涉及使用其他康复操作的医疗	好转	蒋松鹤	郑余银	邹恩苗	运动训练;物理疗法
15436	O303康复科	2025-07-13	2025-08-12	3531987	叶光南	1	56Y	膝关节痛	骨折术后恢复期;脂肪肝;胆囊结石;后天性肾囊肿;前列腺增生;膝关节积液;膝关节滑膜炎;膝关节退行性病变;涉及使用其他康复操作的医疗	好转	蒋松鹤	郑余银	邹恩苗	运动训练;关节松动法;中药熏治;超声波联合治疗
15437	O303康复科	2025-07-15	2025-08-13	3532396	徐秀玉	2	75Y	运动障碍	吞咽困难;认知障碍;物理治疗，其他的;创伤性硬脑膜下血肿;胫骨上端骨折;肱骨上端骨折;肩胛骨骨折;锁骨骨折;胸骨骨折;肋骨多处骨折;髂骨骨折;髋臼骨折;骶骨骨折;耻骨骨折;高血压;下肢动脉粥样硬化;下肢深静脉血栓形成;肝囊肿;肾结石;颈椎间盘突出;高尿酸血症;高脂血症	好转	蒋松鹤	林海燕2	吴登敏	运动训练;作业疗法;物理疗法
15438	O303康复科	2025-07-14	2025-08-13	3532399	李细香	2	55Y	膝关节痛	胫骨平台伴腓骨骨折;闭孔神经损伤;股神经损伤;腓肠神经损伤;膝内侧半月板损伤;膝关节副韧带损伤;涉及使用其他康复操作的医疗;原发性单侧膝关节病;肋骨骨折;腰椎间盘突出;2型糖尿病;后天性肾囊肿	好转	蒋松鹤	郑余银	邹恩苗	运动训练;超声波联合治疗;中药熏治
15439	O303康复科	2025-07-14	2025-08-14	3532838	王锡如	1	75Y	脊髓损伤	骨折术后;特发性骨质疏松伴有病理性骨折;脊柱侧弯;脊柱后凸;胸椎退行性病变;腰椎退行性病变;陈旧性胸椎骨折;椎管内血管瘤;脑卒中后遗症;帕金森病;精神分裂症;低钾血症;胆囊结石;肾结石;肾术后;前列腺增生;肺诊断性影像检查的异常所见;泌尿道感染;涉及使用其他康复操作的医疗	好转	蒋松鹤	郑余银	邹恩苗	运动训练;关节松动法;超声定位下肉毒素注射
15440	O303康复科	2025-06-30	2025-08-14	3532953	刘文波	1	77Y	颈部脊髓损伤	颈椎椎管狭窄;颈椎间盘突出;颈椎骨折;桡骨远端骨折;颈椎退行性病变;骨软骨病，其他特指的;胸腔积液;多处挫伤;带状疱疹不伴有并发症;高血压;心房颤动;高尿酸血症;痛风;前列腺结石;前列腺囊肿;脂肪肝;肾盂积水，其他的;涉及使用其他康复操作的医疗	好转	蒋松鹤	林海燕2	高丽萍	颈椎后路单开门椎管减压术;物理疗法;运动训练;椎体次全切除伴椎间盘切除术
15441	O303康复科	2025-07-17	2025-08-16	3533484	陈加碧	2	50Y	骨盆骨折	髋臼骨折;髂骨骨折;耻骨骨折;骶骨骨折;坐骨骨折;开放性多发性肋骨骨折;腰椎骨折L4;手术后切口感染;腰骶椎间盘突出;腰椎退行性病变;腰椎间盘移位;施莫尔结;脊柱骨软骨病;胸腔积液;高血压;高脂血症;脂肪肝;脑梗死后遗症;涉及使用其他康复操作的医疗	好转	蒋松鹤	林海燕2	高丽萍	运动训练;骨盆外固定装置去除术;物理疗法
15442	O303康复科	2025-07-23	2025-08-19	3534989	王泽统	1	15Y	关节僵硬	运动障碍;皮肤感觉障碍;腓总神经损伤;胫神经损伤;创伤性脾破裂;腹腔积血;肺挫伤;四根以上肋骨骨折不伴第一肋骨骨折;肩胛骨骨折;胸椎横突骨折;髋臼骨折;股骨下端骨折;耻骨骨折;股骨干骨折;多处挫伤;窦性心动过速;涉及使用康复操作的医疗	好转	蒋松鹤	郑余银	郑力宇	运动训练;关节松动法;低频脉冲电治疗;超声波联合治疗
15443	O303康复科	2025-07-22	2025-08-20	3535173	廖燕燕	2	38Y	肘关节僵硬	肱骨远端骨折;肘关节脱位;在前臂水平的尺神经损伤;脂肪肝;牙隐裂;牙髓炎;涉及使用其他康复操作的医疗	好转	蒋松鹤	林海燕2	高丽萍	关节松动法;物理疗法
15444	O303康复科	2025-07-22	2025-08-21	3535629	陈英兰	2	66Y	膝关节痛	骶骨骨折;耻骨骨折;颈椎退行性病变;颈椎间盘突出;腰椎间盘突出;胸椎退行性病变;腰椎退行性病变;脊柱血管瘤;骨质疏松;子宫平滑肌瘤;糖尿病;韧带术后;骨折术后;涉及使用其他康复操作的医疗	好转	蒋松鹤	郑余银	邹恩苗	物理疗法;超声波联合治疗;中药熏药治疗
15445	O303康复科	2025-07-22	2025-08-21	3535633	陈茹	2	39Y	膝关节痛	膝关节僵硬;膝外侧半月板撕裂;半月板变性;膝关节内侧副韧带部分断裂;骨盆骨折;骶骨骨折;耻骨骨折;髋臼骨折;腰椎骨折L5;下肢静脉血栓形成;骨折术后;涉及使用其他康复操作的医疗	好转	蒋松鹤	林海燕2	吴登敏	运动训练;关节松动法;物理疗法;中药熏治
15446	O303康复科	2025-07-28	2025-08-22	3536258	林超俊	1	27Y	腰痛	腰椎骨折L3;腰椎间盘突出;脂肪肝;涉及使用其他康复操作的医疗	好转	蒋松鹤	林海燕2	吴登敏	物理疗法
15447	O303康复科	2025-08-10	2025-08-24	3536701	苗小春	2	58Y	关节僵硬	肺炎;肝囊肿;下肢动脉粥样硬化;慢性胃炎;骨折术后;涉及使用其他康复操作的医疗	好转	蒋松鹤	郑余银	邹恩苗	运动训练;作业疗法;关节松动法
15448	O303康复科	2025-07-24	2025-08-24	3536703	苟章九	1	48Y	全身性疼痛	股骨骨折;肩胛骨骨折;胸椎骨折T5/T6;腰椎骨折L2;肋骨多处骨折;肺挫伤;胸腔积液;皮肤真菌感染;涉及使用其他康复操作的医疗	好转	蒋松鹤	林海燕2	高丽萍	物理疗法;运动训练;中药熏治
15449	O303康复科	2025-06-05	2025-08-26	3537428	缪存坤	1	39Y	颈椎骨折C7	颈部脊髓损伤;颈椎脱位C6/C7;神经源性肠;颈椎棘突骨折;股骨粗隆间骨折;腰骶椎骨骨折;髂骨骨折;四肢瘫痪;肺栓塞;创伤性湿肺;手术后切口感染;泌尿道感染;肝功能检查的异常结果;脊髓病性膀胱	好转	蒋松鹤	郑余银	邹恩苗	后入路颈椎融合术;颈椎后路单开门椎管减压术;颈椎脱位切开复位内固定术;2-3个椎骨融合或再融合;颈椎骨折切开复位内固定术;椎体脊椎融合装置的置入;股骨骨折闭合复位髓内针内固定术;盆骨外固定术;应用单平面外固定架;呼吸机治疗[小于96小时];运动训练;物理疗法
15450	O303康复科	2025-07-30	2025-08-26	3537485	陈益俊	1	16Y	颈部脊髓损伤	运动障碍;皮肤感觉障碍;骨折术后;涉及使用其他康复操作的医疗	好转	蒋松鹤	卢君艳	高丽萍	运动训练;作业疗法;物理疗法
15451	O303康复科	2025-07-27	2025-08-27	3537885	张高云	1	55Y	骶骨骨折	腰椎椎管狭窄;胸腔积液;肝硬化;乙型病毒性肝炎;脾大;胆囊结石;前列腺增生;骨折术后;涉及使用其他康复操作的医疗	好转	蒋松鹤	林海燕2	吴登敏	运动训练;物理疗法;中药熏治
15452	O303康复科	2025-08-13	2025-08-28	3538273	李海军	1	45Y	膝关节僵硬	指间关节脱位;在腕和手水平的其他肌肉和肌腱的损伤;高血压;脂肪肝;肾结石;低钾血症;颈椎病;骨折术后;涉及使用其他康复操作的医疗	好转	蒋松鹤	郑余银	郑力宇	关节松动法;作业疗法;超声波联合治疗;中药熏药治疗
15453	O303康复科	2025-07-21	2025-08-28	3538338	潘正瑛	2	57Y	关节僵硬	创伤性上肢切断后遗症;胸腔积液;下肢静脉肌间血栓形成;肺诊断性影像检查的异常所见;后天性肾囊肿;骨折术后;涉及使用其他康复操作的医疗	好转	蒋松鹤	郑余银	郑力宇	运动训练;关节松动法;作业疗法;低频脉冲电治疗;超声波联合治疗
15454	O303康复科	2025-08-21	2025-08-28	3538345	周玉柱	1	45Y	关节僵硬	骨折术后;涉及使用其他康复操作的医疗	好转	蒋松鹤	郑余银	郑力宇	运动训练;关节松动法;超声波联合治疗;低频脉冲电治疗
15455	O303康复科	2025-08-14	2025-08-28	3538350	叶帮傲	1	76Y	截瘫[双下肢瘫痪]	胸部脊髓损伤;胸椎骨折;胸椎椎管狭窄;脊髓病性膀胱;神经源性肠;肋骨骨折;胸腔积液;皮肤裂伤;颈椎术后;泌尿道感染;硬脑膜下积液;腔隙性脑梗死;肝囊肿;后天性肾囊肿;涉及使用其他康复操作的医疗	治愈	蒋松鹤	郑余银	邹恩苗	截瘫肢体综合训练;运动训练;物理疗法;骨创伤治疗仪使用
15456	O303康复科	2025-08-12	2025-08-28	3538353	徐爱玉	2	57Y	运动障碍	耻骨骨折;腰椎骨折L3;腰椎间盘突出;腰椎退行性病变;胸椎退行性病变;多处挫伤;颈椎病;涉及使用其他康复操作的医疗	治愈	蒋松鹤	卢君艳	高丽萍	运动训练;物理疗法
15457	O303康复科	2025-07-30	2025-08-29	3538740	胡立尧	1	63Y	颈部脊髓损伤	运动障碍;皮肤感觉障碍;胸椎骨折T11/T12;腰椎骨折L3;颈椎间盘创伤性破裂;肌腱和肌肉损伤;颈椎间盘突出;眶骨骨折;肺挫伤;小腿血肿;高血压;泌尿道感染;感染后尿道狭窄;前列腺结石;腰椎退行性病变;腰椎间盘突出;胫骨平台骨折;肋骨骨折;肝钙化灶;矽肺;涉及使用其他康复操作的医疗	好转	蒋松鹤	卢君艳	高丽萍	物理疗法;运动训练;毫针刺法
15458	O303康复科	2025-08-14	2024-09-01	3539880	肖本春	1	63Y	关节僵硬	涉及使用其他康复操作的医疗;髌骨骨折;头皮血肿;颌的其他囊肿;额窦炎;腰椎退行性病变;骨囊肿;骨折术后;清创术后	好转	蒋松鹤	郑余银	邹恩苗	运动训练;关节松动法;物理疗法;中药熏治
15459	O303康复科	2025-08-03	2024-09-02	3540126	彭潮莹	2	54Y	胸椎压缩性骨折	涉及使用其他康复操作的医疗;肺部感染;胸腔积液;肝囊肿;颈椎病	好转	蒋松鹤	郑余银	邹恩苗	物理疗法;超声波联合治疗
15460	O303康复科	2025-08-17	2024-09-04	3541009	丁毅	1	65Y	原发性双侧膝关节病	涉及使用其他康复操作的医疗;膝关节滑膜炎;外侧半月板损伤;内侧半月板后角损伤;膝关节积液;膝关节滑膜囊肿;腰椎间盘突出;腰椎退行性病变;高血压;脂肪肝;肺诊断性影像检查的异常所见;陈旧性肋骨骨折;胸壁挫伤;肾结石;前列腺增生	好转	蒋松鹤	郑余银	邹恩苗	物理疗法;毫针刺法;中药熏治
15461	O303康复科	2024-09-05	2024-09-07	3541799	林英弟	2	66Y	骨质疏松伴有病理性骨折	涉及使用其他康复操作的医疗;腰椎间盘突出;腰椎骨折L2;高血压	好转	蒋松鹤	卢君艳	郑力宇
15462	O303康复科	2025-08-21	2024-09-07	3542063	尤帮言	1	82Y	髋关节僵硬	涉及使用其他康复操作的医疗;髋关节置换术后;股骨颈骨折;泌尿道感染;下肢动脉粥样硬化;腔隙性脑梗死;脂肪肝;胆囊结石;后天性肾囊肿	好转	蒋松鹤	卢君艳	高丽萍	关节松动法;运动训练;物理疗法;毫针刺法
15463	O303康复科	2025-08-27	2024-09-08	3542366	范叔通	1	33Y	关节僵硬	骨折术后恢复期;涉及使用其他康复操作的医疗;腓骨骨折;肩袖损伤;腓总神经损伤;胫神经损伤;小腿多处肌肉和肌腱损伤;膝关节十字韧带断裂;胫骨平台骨折;髌韧带损伤;下肢皮肤缺损;皮肤移植状态;肺诊断性影像检查的异常所见;颈椎间盘突出;创伤后伤口感染;高尿酸血症	好转	蒋松鹤	卢君艳	吴登敏	运动训练;作业疗法;关节松动法;物理疗法;骨创伤治疗仪使用
15464	O303康复科	2025-07-28	2024-09-08	3542389	何守增	1	64Y	髂骨骨折	髋臼骨折;耻骨骨折;髋关节僵硬;腹腔积液;膀胱憩室;肺气肿合并肺大泡;肺诊断性影像检查的异常所见;股静脉血栓形成;下肢静脉血栓形成;肝功能检查的异常结果;涉及使用其他康复操作的医疗	好转	蒋松鹤	卢君艳	郑力宇	关节软骨修复术;骨盆骨折切开复位钢板内固定术;骨盆骨折切开复位钢板内固定术;关节软骨修复术;运动训练;毫针刺法;低频脉冲电治疗
15465	O303康复科	2025-08-18	2024-09-08	3542550	陈学文	1	37Y	关节僵硬	骨折术后恢复期;涉及使用其他康复操作的医疗;前列腺结石;高尿酸血症;膝关节积液;腘动脉粥样硬化;腘动脉狭窄;韧带术后	好转	蒋松鹤	卢君艳	高丽萍	关节松动法;运动训练;物理疗法;中药熏治;毫针刺法
15466	O303康复科	2025-07-13	2024-09-09	3542976	何细赖	1	71Y	腰椎间盘突出	胸椎骨折T5/T6;颈椎间盘变性，其他的;颈椎间盘突出;颈椎椎管狭窄;腰骶横突骨折;髋关节病;肺部感染;腰椎骨折;肺气肿合并肺大泡;肺诊断性影像检查的异常所见;肝囊肿;后天性肾囊肿;髂骨骨折;下肢静脉血栓形成;退行性主动脉瓣疾患;窦性心动过缓;涉及使用其他康复操作的医疗	好转	蒋松鹤	卢君艳	高丽萍	脊神经根阻滞术;毫针刺法;物理疗法
15467	O303康复科	2025-08-18	2024-09-11	3539688	张小儿	1	31Y	关节僵硬	骨折术后恢复期;跟骨骨折;腓骨骨折;骰骨骨折;脂肪肝;涉及使用其他康复操作的医疗	好转	蒋松鹤	郑余银	邹恩苗	运动训练;超声波联合治疗;关节松动法;电动起立床训练
15468	O303康复科	2025-07-18	2024-09-11	3543571	郑文育	1	42Y	内踝骨折	腓骨骨折;创伤性硬膜下出血;创伤性硬脑膜外出血;创伤性蛛网膜下腔出血;枕骨骨折;顶骨骨折;额骨骨折;头皮血肿;肋骨骨折;踝关节强硬;面部软组织挫伤;认知障碍;运动障碍;腰椎间盘突出;腰骶椎弓骨折;低钠血症;乙型病毒性肝炎;肝功能检查的异常结果;肺诊断性影像检查的异常所见	好转	蒋松鹤	卢君艳	吴登敏	踝关节骨折切开复位螺钉内固定术;腓骨骨折切开复位螺钉内固定术;关节软骨修复术;运动训练;关节松动法;物理疗法;毫针刺法;超声波联合治疗
15469	O303康复科	2025-08-31	2024-09-11	3543589	刘杰	1	32Y	关节僵硬	骨折术后恢复期;涉及使用其他康复操作的医疗;尺骨茎突骨折;腕部正中神经损伤;腕部尺神经损伤;腕部桡神经损伤	好转	蒋松鹤	郑余银	邹恩苗	运动训练;关节松动法;物理疗法;毫针刺法;作业疗法
15470	O303康复科	2025-08-11	2024-09-15	3544925	叶爱梅	2	52Y	创伤性截瘫	运动障碍;骶髂关节脱位;肋骨骨折;骶骨区挫伤;后天性肾囊肿;脱垂性内痔;骨质疏松;骨折术后;涉及使用其他康复操作的医疗;胸部脊髓损伤;腰部脊髓损伤;胸椎骨折T11/T12;胸椎脱位T11/T12;腰椎骨折L1;腰椎脱位L1/L2;神经源性肠;神经源性膀胱	好转	蒋松鹤	卢君艳	高丽萍	运动训练;毫针刺法;物理疗法;电动起立床训练
15471	O303康复科	2025-08-15	2024-09-16	3545406	程若	1	29Y	膝关节僵硬	膝关节痛;膝关节后十字韧带损伤;膝关节外侧副韧带损伤;股骨骨折;慢性乙型病毒性肝炎;窦性心动过缓;韧带术后;涉及使用其他康复操作的医疗	好转	蒋松鹤	卢君艳	吴登敏	运动训练;关节松动法;毫针刺法
15472	O303康复科	2025-08-31	2024-09-16	3545441	吴汝龙	1	65Y	创伤性截瘫	胸部脊髓损伤;神经源性膀胱;神经源性肠;运动障碍;腰椎骨折;腰椎间盘突出;血管瘤;肋骨骨折;胸腔积液;肺诊断性影像检查的异常所见;下肢静脉血栓形成;低钠血症;胸椎术后;涉及使用其他康复操作的医疗	好转	蒋松鹤	卢君艳	郑力宇	运动训练;毫针刺法;物理疗法;电动起立床训练;超声波联合治疗;截瘫肢体综合训练
15473	O303康复科	2025-08-07	2024-09-17	3545868	张秀莲	2	45Y	肘关节僵硬	骨折术后;桡肱关节脱位;肩和上肢二度烫伤;上肢肌肉和肌腱的损伤;涉及使用其他康复操作的医疗	治愈	蒋松鹤	郑余银	邹恩苗	关节松动法;超声波联合治疗;运动训练;低频脉冲电治疗
15474	O303康复科	2025-08-11	2024-09-18	3546147	杨才成	1	45Y	髋关节僵硬	颈椎退行性病变;颈椎间盘突出;脂肪肝;肝钙化灶;后天性肾囊肿;股骨良性肿瘤;腹腔积液;骨折术后;涉及使用其他康复操作的医疗	好转	蒋松鹤	郑余银	邹恩苗	骨盆外固定装置去除术;运动训练;低频脉冲电治疗;物理疗法;毫针刺法
15475	O303康复科	2025-04-14	2024-09-18	3546284	吴金妹	2	44Y	跖骨恶性肿瘤	后天性小腿缺失;运动障碍;股骨骨折;膝关节前十字韧带损伤;膝关节外侧副韧带损伤;膝关节积液;骨质疏松;肝功能检查的异常结果;低钾血症;涉及使用其他康复操作的医疗	好转	蒋松鹤	卢君艳	高丽萍	跖骨病损切除术;跖骨钢板内固定术;下肢动脉探查术;下肢动脉血栓切除术;创面封闭式负压引流术（VSD);皮肤伤口切除性清创术;小腿截断术;旋转皮瓣移植术;创面封闭式负压引流术（VSD);皮肤伤口切除性清创术;创面封闭式负压引流术（VSD);运动训练;物理疗法;毫针刺法
15476	O303康复科	2025-08-14	2024-09-19	3546598	李金勇	1	33Y	腰部脊髓损伤	创伤性截瘫;神经源性膀胱;神经源性肠;运动障碍;肋骨骨折;腰椎骨折L2;腰骶横突骨折;创伤性气胸;腰椎术后;涉及使用其他康复操作的医疗	好转	蒋松鹤	卢君艳	高丽萍	截瘫肢体综合训练;毫针刺法;物理疗法;电动起立床训练;运动训练
15477	O303康复科	2024-09-01	2024-09-19	3546712	李茂迁	1	59Y	膝关节僵硬	腓骨小头骨折;外踝骨折;腓总神经损伤;胫神经损伤;皮瓣移植状态;骨质疏松;2型糖尿病;陈旧性肋骨骨折;前列腺增生;下肢动脉粥样硬化;骨折术后;清创术后;涉及使用其他康复操作的医疗	好转	蒋松鹤	郑余银	金韵	毫针刺法;低频脉冲电治疗;超声波联合治疗;运动训练;关节松动法;电动起立床训练
15478	O303康复科	2025-06-29	2024-09-21	3547033	韩远龙	1	55Y	胫骨骨折	髋臼骨折;膝关节僵硬;肌腱和肌肉损伤;颈部脊髓损伤;运动障碍;皮肤感觉障碍;肋骨骨折;颈椎术后;骨折术后;涉及使用其他康复操作的医疗	好转	蒋松鹤	郑余银	金韵	胫骨骨折切开复位钢板内固定术;去除填充物(水泥);膝关节内固定物取出术;胫骨植骨术;创面封闭式负压引流术（VSD);皮肤和皮下组织非切除性清创;运动训练;作业疗法;关节松动法;低频脉冲电治疗;毫针刺法
15479	O303康复科	2025-08-19	2024-09-24	3548341	赵思文	1	59Y	关节僵硬	尺骨桡骨闭合性骨折;肋骨骨折;髂骨骨折;胸腔积液;脂肪肝;下肢动脉粥样硬化;下肢静脉血栓形成;完全性右束支传导阻滞;痛风;涉及使用其他康复操作的医疗	好转	蒋松鹤	郑余银	金韵	运动训练;作业疗法;关节松动法;物理疗法;超声波联合治疗;低频脉冲电治疗
15480	O303康复科	2025-08-24	2024-09-25	3548736	吴细宝	2	47Y	创伤性截瘫	神经源性膀胱;神经源性肠;胸部脊髓损伤;胸椎椎管狭窄;泌尿道感染;骨折术后;涉及使用其他康复操作的医疗	好转	蒋松鹤	郑余银	邹恩苗	截瘫肢体综合训练;运动训练;物理疗法;毫针刺法
15481	O303康复科	2024-09-01	2024-09-25	3548769	陈小华	2	61Y	关节僵硬	肱骨骨折;肩关节脱位;肩袖损伤;股骨颈骨折;骨盆骨折;耻骨骨折;女性盆腔血肿;头皮血肿;肌腱和肌肉损伤;胸腔积液;胸椎压缩性骨折;腰椎间盘突出;骨质增生;骨质疏松;高脂血症;癫痫;下肢静脉曲张;肺诊断性影像检查的异常所见;不完全性右束支传导阻滞;涉及使用其他康复操作的医疗	好转	蒋松鹤	郑余银	金韵	运动训练;毫针刺法;电动起立床训练;超声波联合治疗;关节松动法;低频脉冲电治疗;作业疗法
15482	O303康复科	2025-08-28	2024-09-27	3549645	王文敏	1	30Y	运动障碍	关节僵硬;腓骨骨折;创伤性硬脑膜下血肿;颞部挫伤;骨折术后恢复期;涉及使用其他康复操作的医疗	好转	蒋松鹤	郑余银	金韵	运动训练;低频脉冲电治疗;关节松动法;超声波联合治疗;毫针刺法
15483	O303康复科	2024-09-03	2024-09-27	3549656	张仁俊	1	30Y	创伤性截瘫	运动障碍;神经源性肠;神经源性膀胱;泌尿道感染;骶尾区Ⅳ期压疮;皮肤感觉障碍;肝功能检查的异常结果;脑挫伤;创伤性颅内血肿;创伤性蛛网膜下腔出血;创伤性硬膜下出血;颅骨骨折;肺挫伤;创伤性血气胸;开放性多发性肋骨骨折;开放性多发性胸椎骨折;腰椎骨折L1;面部挫伤;骨质疏松	好转	蒋松鹤	卢君艳	高丽萍	截瘫肢体综合训练;运动训练;物理疗法;毫针刺法;电动起立床训练;超声波联合治疗
15484	O303康复科	2024-09-01	2024-09-28	3549793	邵灵灿	1	25Y	马尾综合征	多发性腰椎骨折;腰椎椎管狭窄;胸椎压缩性骨折;肌肉损伤;骶骨骨折;尾骨骨折;皮肤裂伤;多处挫伤;皮下血肿;脑脊液漏;棘上韧带损伤;气胸;肾结石;涉及使用其他康复操作的医疗	好转	蒋松鹤	卢君艳	郑力宇	运动训练;毫针刺法;低频脉冲电治疗;超声波联合治疗;电动起立床训练
15485	O303康复科	2024-09-22	2024-09-28	3549891	卓士刚	1	57Y	运动障碍	肋骨骨折;肌腱和肌肉损伤;下肢静脉血栓形成;肺挫伤;肺气肿合并肺大泡;肺诊断性影像检查的异常所见;胆囊内胆汁淤积;肝囊肿;骨折术后恢复期;涉及使用其他康复操作的医疗	好转	蒋松鹤	卢君艳	郑力宇	偏瘫肢体综合训练;作业疗法;低频脉冲电治疗;电动起立床训练;毫针刺法;运动训练
15486	O303康复科	2024-09-03	2024-09-29	3550244	叶俊达	1	34Y	关节僵硬	骨盆周围神经损伤;胸椎压缩性骨折;开放性多发性肋骨骨折;肝功能检查的异常结果;低钾血症;涉及使用其他康复操作的医疗	好转	蒋松鹤	郑余银	邹恩苗	运动训练;关节松动法;毫针刺法;物理疗法;电动起立床训练
15487	O303康复科	2024-09-07	2024-09-29	3550248	徐秀玉	2	75Y	运动障碍	认知障碍;胫骨骨折;肱骨骨折;肩胛骨骨折;锁骨骨折;胸骨骨折;肋骨骨折;骨盆骨折;髂骨骨折;髋臼骨折;骶骨骨折;耻骨骨折;特发性(原发性)高血压;高脂血症;下肢深静脉血栓形成;肺挫伤;肺血肿;吞咽困难;下肢动脉粥样硬化;脑外伤恢复期;肝囊肿;肾结石;颈椎间盘突出;胸椎间盘突出	好转	蒋松鹤	卢君艳	吴登敏	运动训练;作业疗法;物理疗法;毫针刺法
15488	O303康复科	2025-08-03	2024-09-29	3550254	牛存生	1	48Y	腰背痛	肩胛骨骨折;关节僵硬;腰椎椎管狭窄;胸椎骨折;肋骨骨折;胸腔积液;气胸;上颌窦筛窦炎;认知障碍;肺诊断性影像检查的异常所见;心因性生理功能障碍;老年性脑萎缩;脱髓鞘性白质脑病;涉及使用其他康复操作的医疗	好转	蒋松鹤	卢君艳	高丽萍	运动训练;物理疗法;毫针刺法;电动起立床训练;超声波联合治疗
15489	O303康复科	2024-09-08	2024-09-29	3550275	娄益算	1	50Y	膝关节僵硬	髋臼骨折;膝关节多处韧带损伤;半月板损伤;肋骨骨折;胸腔积液;后天性肾囊肿;脾术后;骨折术后;韧带术后;涉及使用其他康复操作的医疗	好转	蒋松鹤	郑余银	金韵	运动训练;关节松动法;超声波联合治疗;低频脉冲电治疗;毫针刺法
15490	O303康复科	2025-08-26	2024-09-29	3550278	施蒙茹	2	25Y	膝关节僵硬	小腿撕脱伤;足拇长伸肌腱断裂;趾肌腱断裂;肩胛骨骨折;肌腱和肌肉损伤;气胸;上颌窦炎;骨折术后;涉及使用其他康复操作的医疗	好转	蒋松鹤	郑余银	邹恩苗	运动训练;物理疗法;关节松动法;低频脉冲电治疗;冲击波治疗
15491	O303康复科	2024-09-04	2024-09-30	3550571	华苗苗	2	31Y	运动障碍	神经源性膀胱;神经源性肠;肌病;关节僵硬;肺部感染;骨盆骨折;耻骨联合脱位;胸椎骨折T11/T12;胸椎横突骨折;肋骨多处骨折;肱骨骨折;肱骨内髁骨折;上臂桡神经损伤;胸腔积液;腹腔积液;高血压;肾上腺损伤;肝功能不全;脾损伤;精神分裂症;窦性心动过速;脂肪肝	好转	蒋松鹤	郑余银	邹恩苗	运动训练;作业疗法;关节松动法;低频脉冲电治疗;毫针刺法;联合物理治疗;物理疗法
15492	O303康复科	2024-09-16	2024-09-30	3550697	李玉柳	2	52Y	腰椎骨折L1	2型糖尿病;脂肪肝;上颌窦炎;焦虑性抑郁症;涉及使用其他康复操作的医疗	好转	蒋松鹤	高丽萍	高丽萍	超声波联合治疗;低频脉冲电治疗
15493	O303康复科	2024-09-15	2024-09-30	3550723	徐淑琴	2	44Y	膝关节僵硬	腓总神经损伤;胫神经损伤;骨质疏松;骨折术后;涉及使用其他康复操作的医疗	好转	蒋松鹤	卢君艳	高丽萍	运动训练;物理疗法;毫针刺法;中药熏治;关节松动法;超声波联合治疗
15494	O303康复科	2024-09-29	2024-10-02	3551849	黄邦招	1	44Y	颈椎骨折	颈椎间盘突出;涉及使用其他康复操作的医疗	好转	蒋松鹤	卢君艳	郑力宇
15495	O303康复科	2025-07-28	2024-10-06	3552776	魏垒	2	34Y	眶骨骨折	上颌窦骨折;颧弓骨折;腓骨骨折;创伤性血气胸;肩胛骨骨折;肩关节僵硬;面神经损伤;肋骨多发性骨折伴第一肋骨骨折;颈椎横突骨折;胸椎横突骨折;面部软组织挫伤;肺挫伤;胸部其他特指的损伤;创伤性鼻窦积血;上肢浅表挫伤;涉及使用其他康复操作的医疗	治愈	蒋松鹤	卢君艳	高丽萍	眶骨骨折切开复位术;关节松动法;鼻窦骨折切开复位术;颧弓骨折切开复位术;低频脉冲电治疗;毫针刺法;物理疗法;超声波联合治疗
15496	O303康复科	2024-09-30	2024-10-07	3552940	吴碎金	1	43Y	锁骨骨折	膝内侧半月板损伤;胸部其他和未特指部位的扭伤和劳损;膝挫伤;膝关节积液;肾结石;涉及使用其他康复操作的医疗	好转	蒋松鹤	郑余银	邹恩苗	联合物理治疗;毫针刺法;超声波联合治疗
15497	O303康复科	2025-08-15	2024-10-14	3555190	卢庆奇	1	45Y	手术后切口感染	腰椎压缩性骨折;腰椎椎管狭窄;腰椎间盘突出;椎管内血管瘤;肝血管瘤;腰椎术后;骨折术后恢复期;涉及使用其他康复操作的医疗;腰椎骨折L2;排尿困难;排便困难;泌尿道感染;运动障碍;腰部脊髓损伤;桡骨远端骨折;腰椎骨折L3	治愈	蒋松鹤	卢君艳	郑力宇	开放性骨折部位的清创术;毫针刺法;超声波联合治疗;运动训练;关节松动法;低频脉冲电治疗
15498	O303康复科	2024-09-18	2024-10-18	3557030	郑少妹	2	48Y	膝关节僵硬	膝关节外侧副韧带损伤;膝内侧半月板损伤;骶骨骨折;尾骨骨折;颈椎间盘突出;腰椎间盘突出;腰椎间盘变性;急性牙周炎;非毒性多个甲状腺结节;涉及使用其他康复操作的医疗	好转	蒋松鹤	郑余银	金韵	低频脉冲电治疗;毫针刺法;超声波联合治疗;物理疗法
15499	O303康复科	2024-09-12	2024-10-19	3557094	项光林	1	66Y	臂丛损伤	肩关节前脱位;肩关节盂骨折;肱骨头骨折;肩撞击综合征;肋骨多处骨折;胸腔积液;高血压;2型糖尿病;后天性肾囊肿;肾结石;前列腺增生;前列腺结石;颈椎间盘突出;梅毒病原携带者;涉及使用其他康复操作的医疗	好转	蒋松鹤	郑余银	邹恩苗	运动训练;毫针刺法;关节松动法
15500	O303康复科	2024-09-29	2024-10-19	3557278	朱帅	1	29Y	膝关节僵硬	膝关节内侧副韧带损伤;膝关节前十字韧带损伤;膝关节后十字韧带损伤;膝关节积液;肺诊断性影像检查的异常所见;乙肝表面抗原携带者;骨折术后恢复期;涉及使用其他康复操作的医疗	好转	蒋松鹤	郑余银	邹恩苗	运动训练;毫针刺法;超声波联合治疗;关节松动法;低频脉冲电治疗;磁热疗
15501	O303康复科	2024-09-16	2024-10-19	3557284	翁增兰	2	56Y	骶骨骨折	腰骶棘突骨折;颈椎间盘突出;颈椎退行性病变;腰椎退行性病变;脂肪肝;肾结石;涉及使用其他康复操作的医疗	好转	蒋松鹤	郑余银	金韵	毫针刺法;低频脉冲电治疗;运动训练;超声波联合治疗
15502	O303康复科	2025-08-31	2024-10-21	3558261	贺占洲	1	39Y	多发性骨盆骨折	髂骨骨折;髋臼骨折;耻骨骨折;骶髂关节炎，不可归类在他处者;腰椎间盘突出;胸椎横突骨折;头皮血肿;单侧腹股沟斜疝;腰椎退行性病变;后天性肾囊肿;脂肪肝;清创术后;涉及使用其他康复操作的医疗	好转	蒋松鹤	郑余银	邹恩苗	骨盆骨折切开复位钢板内固定术;股骨牵引;髂骨骨折切开复位螺钉内固定术;关节软骨修复术;髂骨植骨术;毫针刺法;关节松动法;运动训练;低频脉冲电治疗;超声波联合治疗
15503	O303康复科	2024-09-23	2024-10-22	3558537	陈康锋	1	35Y	运动障碍	皮瓣移植状态;腘动脉栓塞;下肢撕脱伤;多处肌肉损伤;肺诊断性影像检查的异常所见;高脂血症;单纯性牙周炎;手术后切口感染;胆囊息肉;后天性小腿缺失;骨折术后;手术后状态，其他特指的;涉及使用其他康复操作的医疗	好转	蒋松鹤	郑余银	金韵	运动训练;关节松动法;超声波联合治疗;毫针刺法;低频脉冲电治疗;物理疗法
15504	O303康复科	2025-08-29	2024-10-23	3559131	程国忠	1	50Y	跖骨骨折	开放性足损伤;双踝骨折;踝关节僵硬;高血压;脂肪肝;前列腺增生;前列腺结石;下肢的局部肿胀、肿物和肿块;涉及使用其他康复操作的医疗	治愈	蒋松鹤	卢君艳	郑力宇	跖骨骨折切开复位螺钉内固定术;皮肤和皮下组织非切除性清创;关节松动法;超声波联合治疗;低频脉冲电治疗;毫针刺法;跖骨骨折切开复位钢板内固定术;跖骨骨折切开复位钢板内固定术;胫骨骨折切开复位螺钉内固定术;筋膜缝合术;中药熏治;关节软骨修复术;跖骨植骨术
15505	O303康复科	2024-09-16	2024-10-23	3559152	潘正瑛	2	57Y	腕关节僵硬	桡骨远端骨折;肋骨多处骨折;肺诊断性影像检查的异常所见;后天性肾囊肿;骨折术后恢复期;手术后状态，其他特指的;涉及使用其他康复操作的医疗	好转	蒋松鹤	郑余银	邹恩苗	运动训练;关节松动法;低频脉冲电治疗;毫针刺法;超声波联合治疗
15506	O303康复科	2024-09-09	2024-10-23	3559168	南卿妹	2	69Y	膝关节僵硬	单侧膝关节骨性关节病;肋骨多处骨折;趾骨骨折;下肢静脉血栓形成;胸腔积液;肝囊肿;急性牙周炎;手术后状态，其他特指的;涉及使用其他康复操作的医疗	好转	蒋松鹤	郑余银	邹恩苗	运动训练;关节松动法;低频脉冲电治疗;超声波联合治疗;中药熏治;物理疗法
15507	O303康复科	2024-10-15	2024-10-26	3560004	林博文	1	13Y	肩关节僵硬	创伤性气胸;肺挫伤;创伤性胸腔积液;肺不张;肋骨多处骨折;骨折术后恢复期;涉及使用其他康复操作的医疗	好转	蒋松鹤	卢君艳	高丽萍	关节松动法;运动训练;物理疗法;低频脉冲电治疗;作业疗法
15508	O303康复科	2024-10-12	2024-10-26	3560028	陈康海	1	34Y	关节僵硬	肱骨下端骨折;腕骨骨折;胫骨骨折;在肩和上臂水平的肌肉和肌腱的损伤;髌腱断裂;背部开放性损伤;屈拇长肌腱损伤后遗症;屈指肌腱损伤后遗症;桡神经损伤后遗症;尺神经损伤后遗症;正中神经损伤后遗症;上肢血管损伤后遗症;下肢血管损伤后遗症	好转	蒋松鹤	郑余银	邹恩苗	运动训练;关节松动法;蜡疗;低频脉冲电治疗;毫针刺法;物理疗法;作业疗法
15509	O303康复科	2024-10-12	2024-10-26	3560041	娄益算	1	50Y	关节僵硬	膝关节后十字韧带部分断裂;膝关节前十字韧带损伤;膝关节外侧副韧带损伤;膝关节内侧副韧带损伤;半月板损伤;肋骨多处骨折;胸腔积液;后天性肾囊肿;脾术后;骨折术后;涉及使用其他康复操作的医疗	好转	蒋松鹤	郑余银	邹恩苗	关节松动法;运动训练;低频脉冲电治疗;超声波联合治疗;中药熏治
15510	O303康复科	2024-09-16	2024-10-27	3548767	朱炳花	2	79Y	髋关节僵硬	骨质疏松伴有病理性骨折;脑缺血灶;腔隙性脑梗死;帕金森病;下肢动脉粥样硬化;锁骨下动脉粥样硬化;颈动脉硬化;心包积液;退行性主动脉瓣疾患;老年性心脏病;冠状动脉支架植入后状态;肺炎;胆囊结石;后天性肾囊肿;肾结石;高血压;肾钙化;腹腔囊肿;2型糖尿病;腰椎退行性病变	好转	蒋松鹤	郑余银	邹恩苗	运动训练;物理疗法;关节松动法;超声波联合治疗;低频脉冲电治疗;毫针刺法;平衡功能训练
15511	O303康复科	2024-10-16	2024-10-27	3560667	张仕军	1	57Y	腰椎压缩性骨折	胸椎压缩性骨折;肋骨多处骨折;肺诊断性影像检查的异常所见;腹腔内和盆腔的肿胀、肿物和肿块;肾结石;后天性肾囊肿;腰椎退行性病变;腰椎间盘突出;涉及使用其他康复操作的医疗	好转	蒋松鹤	卢君艳	郑力宇	低频脉冲电治疗
15512	O303康复科	2024-10-23	2024-10-28	3561249	余福寿	1	61Y	创伤性截瘫	颈部脊髓损伤;胸椎多处骨折;颈椎多处骨折;肺部感染;肩胛骨骨折;肋骨多处骨折;神经源性膀胱;神经源性肠;运动障碍;肋骨骨折;肺挫伤;低蛋白血症;贫血;麻痹性肠梗阻;下肢静脉血栓形成;多处皮肤浅表挫伤;手术后状态，其他特指的;涉及使用其他康复操作的医疗	好转	蒋松鹤	卢君艳	高丽萍	截瘫肢体综合训练;运动训练;物理疗法;毫针刺法
15513	O303康复科	2024-09-22	2024-10-29	3561424	曹正青	1	55Y	创伤性截瘫	腰部脊髓损伤;腰椎间盘突出;髂骨骨折;髋臼骨折;骶骨骨折;肋骨多处骨折;多处皮肤浅表挫伤;胸腔积液;肺不张;肺气肿合并肺大泡;膈疝;后天性肾囊肿;前列腺增生;泌尿道感染;附睾炎;下肢静脉血栓形成;外侧半月板前角损伤;膝关节前十字韧带损伤;膝关节后十字韧带损伤;膝关节积液	好转	蒋松鹤	卢君艳	郑力宇	截瘫肢体综合训练;运动训练;物理疗法;毫针刺法;超声波联合治疗;中药熏治
15514	O303康复科	2024-10-07	2024-10-29	3561466	许发扬	1	16Y	踝关节僵硬	三踝骨折;踝关节半脱位;腰椎骨折L2;腰椎骨折L4;腰椎椎管狭窄;涉及使用其他康复操作的医疗	好转	蒋松鹤	郑余银	邹恩苗	运动训练;关节松动法;低频脉冲电治疗;超声波联合治疗;中药熏治
15515	O303康复科	2024-10-13	2024-10-29	3561492	冯志光	1	57Y	膝关节僵硬	膝关节后十字韧带部分断裂;膝关节内侧副韧带损伤;腓骨头骨折;肋骨多处骨折;皮肤移植状态;多发性脑梗死;骨质疏松;脂肪肝;吞咽困难;下肢动脉粥样硬化;骨折术后恢复期;涉及使用其他康复操作的医疗	好转	蒋松鹤	卢君艳	高丽萍	关节松动法;运动训练;物理疗法;中药熏治;毫针刺法;低频脉冲电治疗
15516	O303康复科	2024-09-30	2024-10-29	3561713	陈秋慧	2	53Y	肩关节僵硬	颈椎多发性骨折;肋骨多处骨折;颈椎间盘突出;创伤性气胸;创伤性胸腔积液;胸椎术后;骨折术后恢复期;涉及使用其他康复操作的医疗	好转	蒋松鹤	郑余银	邹恩苗	低频脉冲电治疗;超声波联合治疗;毫针刺法;物理疗法
15517	O303康复科	2024-10-01	2024-10-30	3561861	蔡恒贵	1	50Y	肱骨远端骨折	颈椎多发性骨折;腰椎骨折;背部挫伤;关节僵硬;颈椎间盘突出;颈椎退行性病变;腰椎间盘突出;腰椎退行性病变;多处皮肤浅表挫伤;脑缺血灶;后天性肾囊肿;涉及使用其他康复操作的医疗	好转	蒋松鹤	郑余银	金韵	毫针刺法;低频脉冲电治疗;蜡疗;作业疗法;关节松动法;超声波联合治疗;肱骨骨折切开复位钢板内固定术;关节软骨修复术
15518	O303康复科	2024-10-05	2024-10-30	3562162	刘爱平	1	38Y	圆锥马尾综合征	腰椎骨折L2;腰椎压缩性骨折;腰椎椎管狭窄;腰椎间盘突出;脂肪肝;胆囊息肉;腰椎术后;涉及使用其他康复操作的医疗	好转	蒋松鹤	卢君艳	郑力宇	毫针刺法;低频脉冲电治疗;电动起立床训练;运动训练;超声波联合治疗
15519	O303康复科	2024-10-14	2024-11-02	3562803	张秀莲	2	45Y	肘关节僵硬	肘关节脱位;前臂尺神经损伤;上肢肌肉和肌腱的损伤;骨折术后恢复期;手术后状态，其他特指的;涉及使用其他康复操作的医疗	好转	蒋松鹤	邹恩苗	金韵	运动训练;磁热疗;关节松动法;超声波联合治疗;低频脉冲电治疗;作业疗法;物理疗法
15520	O303康复科	2024-10-30	2024-11-05	3564203	程翠容	2	56Y	创伤性截瘫	腰部脊髓损伤;神经源性膀胱;神经源性肠;骨质疏松;腰椎滑脱;腰椎骨折;涉及使用其他康复操作的医疗	好转	蒋松鹤	卢君艳	高丽萍	截瘫肢体综合训练;运动训练;物理疗法;毫针刺法;电动起立床训练
15521	O303康复科	2024-10-04	2024-11-06	3564415	蔡加星	1	40Y	创伤性截瘫	颈部脊髓损伤;神经源性膀胱;神经源性肠;运动障碍;颈椎滑脱;颈部挫伤;创伤性脑脊液漏;声带麻痹;颈部食管挫伤;肋骨多处骨折;骶骨骨折;胸腔积液;多处挫伤;下肢深静脉血栓形成;髂总动脉血栓形成;髂外静脉血栓形成;下肢静脉肌间血栓形成;泌尿道感染;肝功能检查的异常结果	好转	蒋松鹤	郑余银	邹恩苗	截瘫肢体综合训练;运动训练;作业疗法;针刺;电动起立床训练;超声波联合治疗;物理疗法
15522	O303康复科	2024-10-15	2024-11-06	3564463	张文科	1	44Y	膝关节僵硬	髋关节僵硬;胸腔积液;单侧腹股沟斜疝;肺诊断性影像检查的异常所见;骨折术后恢复期;涉及使用其他康复操作的医疗	好转	蒋松鹤	卢君艳	高丽萍	运动训练;关节松动法;低频脉冲电治疗;超声波联合治疗;中药熏治;物理疗法
15523	O303康复科	2024-11-01	2024-11-06	3564570	郑玉双	2	55Y	膝关节僵硬	髌骨骨折;涉及使用其他康复操作的医疗	好转	蒋松鹤	卢君艳	高丽萍	运动训练;毫针刺法;超声波联合治疗;物理疗法
15524	O303康复科	2024-10-09	2024-11-06	3564584	张良聪	1	49Y	关节僵硬	肩袖损伤;涉及使用其他康复操作的医疗;骨折术后	好转	蒋松鹤	郑余银	金韵	关节松动法;超声波联合治疗;关节穿刺术;作业疗法;低频脉冲电治疗;蜡疗;中药熏治;关节穿刺术
15525	O303康复科	2024-09-21	2024-11-06	3564592	郑永平	1	62Y	髋关节僵硬	股骨头骨折;周围神经病;胸椎压缩性骨折;腰椎间盘突出;胸椎退行性病变;颈椎退行性病变;颈椎间盘突出;颈椎椎管狭窄;骨质疏松;前列腺增生;前列腺结石;胆囊结石;高血压;2型糖尿病;骨折术后恢复期;涉及使用其他康复操作的医疗	好转	蒋松鹤	郑余银	金韵	运动训练;关节松动法;低频脉冲电治疗;针刺;超声波联合治疗;磁热疗;物理疗法
15526	O303康复科	2024-10-09	2024-11-06	3564750	王文敏	1	30Y	关节僵硬	下肢神经的损伤;腓骨干骨折;骨折术后恢复期;涉及使用其他康复操作的医疗	好转	蒋松鹤	郑余银	邹恩苗	针刺;冲击波治疗;关节松动法;运动训练;超声波联合治疗;等速肌力训练
15527	O303康复科	2024-10-29	2024-11-07	3564984	林月华	2	72Y	膝关节僵硬	原发性单侧膝关节病;高血压;2型糖尿病;骨折术后;涉及使用其他康复操作的医疗	好转	蒋松鹤	郑余银	邹恩苗	运动训练;作业疗法;关节松动法;磁热疗;等速肌力训练;超短波短波疗法;低频脉冲电治疗
15528	O303康复科	2024-10-09	2024-11-07	3565188	李海军	1	45Y	膝关节僵硬	指骨中节骨折;指间关节脱位;手部指内在肌腱损伤;指神经损伤;手指血管损伤,其他的;高血压;低钾血症;脂肪肝;颈椎病;肾结石;涉及使用其他康复操作的医疗;手术后状态，其他特指的	好转	蒋松鹤	郑余银	金韵	运动训练;作业疗法;关节松动法;中药熏治;超声波联合治疗;冲击波治疗
15529	O303康复科	2024-10-09	2024-11-10	3566206	李永华	1	47Y	四肢瘫痪	神经源性肠;颈部脊髓损伤;颈椎多发性骨折;颈椎滑脱;神经源性膀胱;颈椎椎管狭窄;创伤性颈椎间盘破裂;腹股沟损伤;颈部挫伤;头皮裂伤;低钙血症;低钠血症;泌尿道感染;骨折术后;涉及使用其他康复操作的医疗	好转	蒋松鹤	卢君艳	郑力宇	运动训练;作业疗法;毫针刺法;物理疗法
15530	O303康复科	2024-10-27	2024-11-10	3566314	胡斌	1	46Y	关节僵硬	臂丛神经损伤;上臂桡神经损伤;上臂正中神经损伤;上臂尺神经损伤;手部指屈肌损伤;手部拇指长屈肌损伤;上肢浅表挫伤;高血压;涉及使用其他康复操作的医疗;清创术后;骨折术后	好转	蒋松鹤	郑余银	金韵	针刺;蜡疗;超声波联合治疗;关节松动法;作业疗法;低频脉冲电治疗;中药熏治;运动训练;物理疗法
15531	O303康复科	2024-10-15	2024-11-11	3566446	邵灵灿	1	25Y	马尾综合征	腰椎骨折L3;腰椎椎管狭窄;胸椎压缩性骨折;腰椎压缩性骨折;骶骨骨折;尾骨骨折;肾结石;腰椎间盘突出;涉及使用其他康复操作的医疗	好转	蒋松鹤	卢君艳	郑力宇	运动训练;行走和步态训练;毫针刺法;低频脉冲电治疗
15532	O303康复科	2024-10-10	2024-11-11	3566460	黄植砖	1	55Y	四肢瘫痪	颈部脊髓损伤;神经源性膀胱;胫腓骨干骨折;多处挫伤;颈椎间盘突出;颈椎退行性病变;胸椎退行性病变;腰椎退行性病变;泌尿道感染;涉及使用其他康复操作的医疗	好转	蒋松鹤	郑余银	金韵	运动训练;针刺;作业疗法;低频脉冲电治疗;磁热疗;物理疗法
15533	O303康复科	2024-10-26	2024-11-12	3567254	林铭亮	1	48Y	关节僵硬	涉及使用其他康复操作的医疗;骨折术后;手术后状态，其他特指的	好转	蒋松鹤	郑余银	邹恩苗	运动训练;作业疗法;关节松动法;针刺;超声波联合治疗;物理疗法
15534	O303康复科	2024-10-13	2024-11-12	3567289	魏垒	2	34Y	肩关节僵硬	面神经损伤;肩胛骨骨折;眶骨骨折;上颌窦骨折;颧弓骨折;面部挫伤;上肢浅表挫伤;肋骨多发性骨折伴第一肋骨骨折;颈椎横突骨折;胸椎横突骨折;腓骨干骨折;涉及使用其他康复操作的医疗	好转	蒋松鹤	卢君艳	高丽萍	关节松动法;运动训练;物理疗法;毫针刺法;低频脉冲电治疗
15535	O303康复科	2024-10-14	2024-11-13	3567303	林缪素	2	40Y	踝关节僵硬	皮瓣移植状态;骨折术后;涉及使用其他康复操作的医疗	好转	蒋松鹤	卢君艳	高丽萍	运动训练;关节松动法;中药熏治;物理疗法;超声波联合治疗
15536	O303康复科	2024-10-16	2024-11-13	3567436	徐淑琴	2	44Y	踝关节僵硬	腓总神经损伤;胫神经损伤;涉及使用其他康复操作的医疗;骨折术后	好转	蒋松鹤	卢君艳	高丽萍	关节松动法;运动训练;物理疗法;毫针刺法;中药熏治
15537	O303康复科	2024-10-02	2024-11-14	3568058	陶鑫怡	2	12Y	坐骨骨折	下肢水肿;跟腱损伤;足挫伤;涉及使用其他康复操作的医疗	好转	蒋松鹤	郑余银	金韵	超声波联合治疗;针刺;关节松动法;中药熏治;磁热疗;物理疗法
15538	O303康复科	2024-11-08	2024-11-16	3568406	范叔通	1	33Y	肩关节僵硬	腓骨骨折;肩袖损伤;胫神经损伤;腓总神经损伤;胫骨平台骨折;膝关节后十字韧带损伤;膝关节损伤;下肢皮肤缺损;皮肤移植状态;肺诊断性影像检查的异常所见;颈椎间盘突出;骨折术后;手术后状态，其他特指的;涉及使用其他康复操作的医疗	好转	蒋松鹤	卢君艳	高丽萍	运动训练;关节松动法;超声波联合治疗;毫针刺法;作业疗法
15539	O303康复科	2024-10-27	2024-11-16	3568455	叶东星	1	48Y	颈椎间盘突出	肩袖损伤;肾积水伴肾结石;颈部脊髓损伤后遗症;肩峰下滑囊炎;腰肌劳损;棘上韧带损伤;输尿管扩张;高尿酸血症;前列腺增生;前列腺结石;骨折术后恢复期;涉及使用其他康复操作的医疗	好转	蒋松鹤	卢君艳	高丽萍	毫针刺法;物理疗法;中药熏治;关节穿刺术;电动起立床训练
15540	O303康复科	2024-11-05	2024-11-23	3571235	苏为守	1	41Y	踝关节僵硬	胫腓骨干骨折;胫神经损伤;腓总神经损伤;跖骨基底骨折;股骨颈骨折;小腿挫伤;腰椎间盘突出;涉及使用其他康复操作的医疗	好转	蒋松鹤	卢君艳	高丽萍	运动训练;关节松动法;低频脉冲电治疗;超声波联合治疗;针灸
15541	O303康复科	2024-10-23	2024-11-23	3571541	吕云和	1	64Y	关节僵硬	胫神经损伤;腓总神经损伤;基底节脑梗死;肋骨多处骨折;胸腔积液;肺诊断性影像检查的异常所见;肝囊肿;后天性肾囊肿;慢性中耳炎;下肢动脉粥样硬化;涉及使用其他康复操作的医疗;骨折术后	好转	蒋松鹤	郑余银	金韵	运动训练;关节松动法;低频脉冲电治疗;针刺;超声波联合治疗;中药熏治;物理疗法
15542	O303康复科	2024-10-22	2024-11-24	3571695	黄卓帆	1	14Y	关节僵硬	尺骨下端骨折;眶骨骨折;眼睑挫伤;面部软组织挫伤;骨质疏松;骨折术后;涉及使用其他康复操作的医疗	好转	蒋松鹤	郑余银	邹恩苗	骨创伤治疗仪使用;低频脉冲电治疗
15543	O303康复科	2024-11-19	2024-11-24	3571814	张崇月	2	58Y	肩关节僵硬	肩袖损伤;肩胛骨骨折;跟骨骨折;楔状骨骨折(足);高血压;2型糖尿病;乳腺术后;涉及使用其他康复操作的医疗	好转	蒋松鹤	郑余银	邹恩苗	运动训练;超声波联合治疗;关节松动法;作业疗法;磁热疗
15544	O303康复科	2024-10-30	2024-11-25	3572061	项光林	1	66Y	肩关节僵硬	臂丛神经损伤;肩关节前脱位;肩关节半脱位;肩关节盂骨折;肱骨头骨折;肩撞击综合征;肋骨多处骨折;肋骨骨折;高血压;2型糖尿病;后天性肾囊肿;肾结石;前列腺增生;前列腺结石;颈椎间盘突出;梅毒病原携带者;涉及使用其他康复操作的医疗	好转	郑余银	郑余银	邹恩苗	运动训练;针刺;关节松动法;联合物理治疗;低频脉冲电治疗
15545	O303康复科	2024-10-05	2024-11-25	3572315	谭发万	1	52Y	髂骨骨折	腰椎骨折;胸椎骨折;腰椎椎管狭窄;肩胛骨骨折;寰枢椎脱位;颈椎退行性病变;皮下血肿;运动障碍;创伤性气胸;肝钙化灶;涉及使用其他康复操作的医疗	好转	蒋松鹤	郑余银	邹恩苗	髂骨骨折切开复位钢板内固定术;髂骨人工骨植骨术;骨创伤治疗仪使用;超声波联合治疗;针刺;腰椎骨折切开复位内固定术;低频脉冲电治疗
15546	O303康复科	2024-10-20	2024-11-25	3572453	徐晓艺	2	31Y	踝关节僵硬	踝关节骨折;踝距腓前韧带断裂;涉及使用其他康复操作的医疗	好转	蒋松鹤	卢君艳	高丽萍	关节松动法;物理疗法;中药熏治;毫针刺法;运动训练;蜡疗;超声波联合治疗;低频脉冲电治疗
15547	O303康复科	2024-11-10	2024-11-26	3572633	金国真	1	53Y	创伤性截瘫	胸部脊髓损伤;神经源性膀胱;神经源性肠;肋骨骨折;肝功能不全;脂肪肝;带状疱疹不伴有并发症;前列腺结石;肺诊断性影像检查的异常所见;胸椎术后;涉及使用其他康复操作的医疗	好转	蒋松鹤	卢君艳	高丽萍	截瘫肢体综合训练;运动训练;针刺;物理疗法;骨创伤治疗仪使用;超声波联合治疗
15548	O303康复科	2024-10-15	2024-11-26	3572659	李克	1	32Y	肩关节僵硬	肩袖损伤;腋神经损伤;肩胛上神经损伤;肱骨大结节骨折;涉及使用其他康复操作的医疗	好转	蒋松鹤	郑余银	邹恩苗	运动训练;作业疗法;关节松动法;物理疗法;中药熏治;关节穿刺术;超短波短波疗法
15549	O303康复科	2024-11-24	2024-11-26	3572661	季金丹	2	83Y	胸椎骨折T11/T12	腰背痛;骨质疏松;2型糖尿病;胸椎退行性病变;腰椎间盘突出;肝囊肿;后天性肾囊肿;低钠血症;腰椎术后;涉及使用其他康复操作的医疗	好转	蒋松鹤	卢君艳	郑力宇
15550	O303康复科	2024-10-30	2024-11-27	3572988	韩远龙	1	55Y	关节僵硬	运动障碍;颈部脊髓损伤;皮肤感觉障碍;肋骨骨折;骨折术后;手术后状态，其他特指的;颈椎术后;涉及使用其他康复操作的医疗	好转	蒋松鹤	郑余银	金韵	运动训练;关节松动法;超声波联合治疗;中药熏治;针刺;等速肌力训练
15551	O303康复科	2024-10-30	2024-11-30	3574151	简强强	1	29Y	关节僵硬	腰骶神经损伤;神经源性膀胱;神经源性肠;骶骨骨折;腰骶横突骨折;骨折术后;涉及使用其他康复操作的医疗	好转	蒋松鹤	郑余银	邹恩苗	运动训练;针刺;关节松动法;低频脉冲电治疗;超声波联合治疗
15552	O303康复科	2024-11-03	2024-12-03	3575287	刘红万	1	22Y	创伤性截瘫	胸部脊髓损伤;神经源性膀胱;神经源性肠;创伤性硬脑膜下血肿;肋骨骨折;胸腔积液;泌尿道感染;胸椎术后;脑术后;涉及使用其他康复操作的医疗	好转	蒋松鹤	卢君艳	郑力宇	运动训练;低频脉冲电治疗;针灸;电动起立床训练
15553	O303康复科	2024-11-09	2024-12-03	3575308	王银妹	2	89Y	髋关节僵硬	肝囊肿;胆囊结石;后天性肾囊肿;肾结石;下肢动脉粥样硬化;下肢静脉血栓形成;肺诊断性影像检查的异常所见;肺动脉高压中度;慢性咽炎;骨折术后;人工关节术后;涉及使用其他康复操作的医疗	好转	蒋松鹤	郑余银	邹恩苗	超声波联合治疗;运动训练;低频脉冲电治疗;关节松动法
15554	O303康复科	2024-11-06	2024-12-03	3575604	毛素云	2	60Y	髋关节僵硬	股骨颈骨折;趾骨骨折;下肢动脉粥样硬化;后天性肾囊肿;肺诊断性影像检查的异常所见;肝囊肿;肝功能检查的异常结果;涉及使用其他康复操作的医疗;髋关节置换术后;骨折术后	好转	蒋松鹤	郑余银	金韵	运动训练;关节松动法;低频脉冲电治疗;超声波联合治疗;物理疗法
15555	O303康复科	2024-12-01	2024-12-06	3576603	李娒弟	2	86Y	老年性骨质疏松伴病理性骨折	腰痛;陈旧性胸椎骨折;心力衰竭;高血压;糖尿病;肝硬化;肺诊断性影像检查的异常所见;下肢动脉粥样硬化;肾上腺肿物;涉及使用其他康复操作的医疗;阑尾术后;骨折术后;肝术后	好转	蒋松鹤	卢君艳	高丽萍	针刺;运动训练;其他控制气压和空气成分的疗法;低频脉冲电治疗
15556	O303康复科	2024-11-03	2024-12-07	3576827	陈素芬	2	52Y	急性不完全性四肢瘫	颈部脊髓损伤;神经源性膀胱;神经源性肠;运动障碍;泌尿道感染;颈椎骨折;颈椎椎管狭窄;颈椎间盘突出;胸腔积液;肺诊断性影像检查的异常所见;涉及使用其他康复操作的医疗;颈椎术后	好转	蒋松鹤	卢君艳	高丽萍	运动训练;低频脉冲电治疗;针刺;物理疗法;截瘫肢体综合训练;其他控制气压和空气成分的疗法;作业疗法
15557	O303康复科	2024-11-12	2024-12-09	3577674	张秀莲	2	45Y	肘关节僵硬	尺骨鹰嘴骨折;桡肱关节脱位;上肢浅表损伤;手术后状态，其他特指的;骨折术后;涉及使用其他康复操作的医疗	好转	蒋松鹤	郑余银	邹恩苗	运动训练;关节松动法;低频脉冲电治疗;超声波联合治疗;作业疗法;骨创伤治疗仪使用
15558	O303康复科	2024-11-09	2024-12-10	3578242	周丕竹	1	75Y	四肢瘫痪	颈部脊髓损伤;神经源性膀胱;神经源性肠;颈椎骨折;胸椎骨折;颈椎退行性病变;颈椎间盘突出;颈椎脱位C5/C6;皮下血肿;眼球萎缩;2型糖尿病;胸腔积液;睾丸鞘膜积液;后天性肾囊肿;前列腺增生;前列腺钙化灶;腹腔积液;下肢静脉血栓形成;受压区压疮;颈椎椎管狭窄;泌尿道感染	好转	蒋松鹤	卢君艳	郑力宇	截瘫肢体综合训练;运动训练;作业疗法;针灸;电动起立床训练;物理疗法
15559	O303康复科	2024-11-25	2024-12-11	3578560	李丽芬	2	74Y	原发性双侧膝关节病	颈椎病;2型糖尿病性周围神经病;2型糖尿病性肾病;特发性(原发性)高血压;高脂血症;下肢动脉粥样硬化;胫前动脉狭窄;股总动脉狭窄;腔隙性脑梗死;桡骨远端骨折;骨质疏松;涉及使用其他康复操作的医疗	好转	蒋松鹤	郑余银	金韵	作业疗法;蜡疗;磁热疗;中药熏治;超声波联合治疗;运动训练
15560	O303康复科	2024-11-10	2024-12-11	3578592	虞叶胜	1	69Y	关节僵硬	多发性骨盆骨折;腓骨小头骨折;膝内侧半月板损伤;膝关节十字韧带损伤;膝关节外侧副韧带损伤;下肢撕脱伤;胸部损伤;创伤性膈疝;肋骨多处骨折;肺挫伤;创伤性胸腔积液;腹部损伤;创伤性肝破裂;腹腔内出血;头部的损伤;面部裂伤;唇裂伤;创伤性牙齿脱落;下肢静脉血栓形成;高血压	好转	蒋松鹤	郑余银	金韵	运动训练;关节松动法;低频脉冲电治疗;超声波联合治疗;物理疗法
15561	O303康复科	2024-11-30	2024-12-13	3579293	林缪素	2	40Y	踝关节僵硬	骨折术后;皮瓣移植状态;涉及使用其他康复操作的医疗	治愈	蒋松鹤	卢君艳	郑力宇	运动训练;关节松动法;超声波联合治疗;针刺;中药熏治
15562	O303康复科	2024-11-11	2024-12-14	3579500	杜红坤	1	55Y	膝内侧半月板撕裂	膝关节内侧副韧带损伤;膝关节后十字韧带损伤;腓骨头骨折;膝关节损伤;臂丛神经损害;颈神经根损害;关节僵硬;颈椎间盘突出;急性扁桃体炎;带状疱疹不伴有并发症;涉及使用其他康复操作的医疗;胸椎术后;骨折术后	好转	蒋松鹤	郑余银	金韵	针刺;超声波联合治疗;低频脉冲电治疗;关节松动法;作业疗法;艾灸;运动训练
15563	O303康复科	2024-11-13	2024-12-16	3580540	李卷友	1	41Y	关节僵硬	痛风;涉及使用其他康复操作的医疗;骨折术后;手术后状态，其他特指的	好转	蒋松鹤	郑余银	邹恩苗	运动训练;关节松动法;超声波联合治疗;骨创伤治疗仪使用;中药熏治
15564	O303康复科	2024-11-17	2024-12-17	3580814	吴珠英	2	50Y	关节僵硬	腕骨骨折，其他特指的;骨折术后;手术后状态，其他特指的;涉及使用其他康复操作的医疗	好转	蒋松鹤	郑余银	邹恩苗	运动训练;作业疗法;关节松动法;超声波联合治疗;蜡疗;低频脉冲电治疗
15565	O303康复科	2024-11-17	2024-12-17	3580969	陈芩尤	2	51Y	关节僵硬	涉及使用其他康复操作的医疗;骨折术后;手术后状态，其他特指的	好转	蒋松鹤	郑余银	邹恩苗	关节运动训练;关节松动法;超声波联合治疗;作业疗法;蜡疗
15566	O303康复科	2024-11-07	2024-12-17	3580984	潘正瑛	2	57Y	关节僵硬	桡骨远端骨折;肋骨多处骨折;肺诊断性影像检查的异常所见;后天性肾囊肿;肾结石;涉及使用其他康复操作的医疗;骨折术后;手术后状态，其他特指的	好转	蒋松鹤	郑余银	金韵	作业疗法;关节松动法;超声波联合治疗;低频脉冲电治疗;运动训练
15567	O303康复科	2024-11-14	2024-12-17	3581151	黄琴	2	25Y	膝关节僵硬	手术后切口感染;大腿挤压伤;下肢皮肤撕裂伤;骨折术后	好转	蒋松鹤	卢君艳	高丽萍
15568	O303康复科	2024-11-27	2024-12-18	3581296	郑少妹	2	48Y	关节僵硬	膝关节外侧副韧带损伤;膝内侧半月板损伤;骶骨骨折;尾骨骨折;颈椎间盘突出;腰椎间盘变性;非毒性多个甲状腺结节;手术后状态，其他特指的;涉及使用其他康复操作的医疗	好转	蒋松鹤	郑余银	金韵	运动训练;超声波联合治疗;针刺;中药熏治;磁热疗
15569	O303康复科	2024-11-13	2024-12-21	3582584	王爱华	2	51Y	取除骨折内固定装置	关节僵硬;涉及使用其他康复操作的医疗	其他	蒋松鹤	郑余银	金韵	超声波联合治疗;运动训练;关节松动法;低频脉冲电治疗;电动起立床训练;骨盆内固定装置去除术
15570	O303康复科	2024-11-30	2024-12-22	3583018	马存生	1	48Y	运动障碍	主动脉夹层B型;枢椎骨折;寰枢椎脱位;胸椎骨折;肋骨多处骨折;颈椎退行性病变;颈椎间盘突出;肝功能检查的异常结果;胸腔积液;胆囊结石;肺诊断性影像检查的异常所见;下肢动脉粥样硬化;血管支架植入术后状态;涉及使用其他康复操作的医疗	好转	蒋松鹤	卢君艳	高丽萍	其他控制气压和空气成分的疗法;毫针刺法
15571	O303康复科	2024-10-30	2024-12-23	3583093	杨联光	1	55Y	开放性足损伤	腘窝开放性损伤;胫骨下端骨折;腓骨干骨折;面部损伤;上颌窦筛窦炎;肺诊断性影像检查的异常所见;肠系膜炎;脂肪肝;高脂血症;涉及使用其他康复操作的医疗	好转	蒋松鹤	郑余银	邹恩苗	经足截断术;皮肤伤口切除性清创术;石膏托固定术;低频脉冲电治疗
15572	O303康复科	2024-11-18	2024-12-24	3583816	项宗者	1	64Y	关节僵硬	髂骨骨折;骶骨骨折;耻骨骨折;多处皮肤破损;大腿开放性伤口;尿道损伤;皮肤挫伤;皮下血肿;后天性肾囊肿;前列腺钙化灶;涉及使用其他康复操作的医疗	好转	蒋松鹤	卢君艳	高丽萍	运动训练;物理疗法;关节松动法;低频脉冲电治疗
15573	O303康复科	2024-12-15	2024-12-25	3584053	谢作胜	1	46Y	运动障碍	胆囊息肉;骨折术后;涉及使用其他康复操作的医疗	好转	蒋松鹤	卢君艳	高丽萍	运动训练;行走和步态训练;物理疗法
15574	O303康复科	2024-12-03	2024-12-25	3584382	项光林	1	66Y	关节僵硬	臂丛损伤;高血压;2型糖尿病;肩撞击综合征;肩关节半脱位;肩关节前脱位;肩关节盂骨折;肋骨多处骨折;后天性肾囊肿;肾结石;前列腺增生;前列腺结石;颈椎间盘突出;梅毒病原携带者;涉及使用其他康复操作的医疗	好转	蒋松鹤	郑余银	金韵	针刺;运动训练;关节松动法;手功能评估;作业疗法;低频脉冲电治疗
15575	O303康复科	2024-11-13	2024-12-25	3584385	包新澳	1	20Y	脊髓损伤	腰椎骨折L1;腰椎椎管狭窄;骶骨骨折;耻骨骨折;胫骨骨折;腰椎骨折;胸椎骨折;胸骨骨折;创伤性胸腔积液;腰部软组织损伤;双相情感障碍;手术后切口感染;上颌窦炎;晶状体疾患;涉及使用其他康复操作的医疗	好转	蒋松鹤	卢君艳	郑力宇	运动训练;低频脉冲电治疗;毫针刺法
15576	O303康复科	2024-11-23	2024-12-26	3584536	苏为允	1	52Y	关节僵硬	腕舟骨骨折;涉及使用其他康复操作的医疗;血管成形术后;骨折术后	好转	蒋松鹤	郑余银	邹恩苗	运动训练;关节松动法;毫针刺法;超声波联合治疗;蜡疗
15577	O303康复科	2024-11-26	2024-12-26	3584553	朱士安	1	51Y	关节僵硬	腕关节脱位;桡骨远端骨折;腓总神经损害;胸膜肥厚;前臂正中神经断裂;手部指屈肌损伤;甲状腺结节;脂肪肝;胆囊内胆汁淤积;前列腺结石;鼻窦炎;肾结石;涉及使用其他康复操作的医疗;骨折术后;手术后状态，其他特指的	好转	蒋松鹤	郑余银	金韵	运动训练;作业疗法;低频脉冲电治疗;中药熏治;蜡疗;超声波联合治疗;关节松动法;电动起立床训练;针刺
15578	O303康复科	2024-11-18	2024-12-29	3585521	陈巧清	1	79Y	四肢瘫痪	颈部脊髓损伤;Ⅲ度房室传导阻滞;神经源性膀胱;神经源性肠;冠状动脉粥样硬化性心脏病;高血压;2型糖尿病;泌尿道感染;慢性肾病;低蛋白血症;颈椎骨折;颈椎间盘突出;胸腔积液;涉及使用其他康复操作的医疗;具有心脏起搏器	好转	蒋松鹤	卢君艳	高丽萍	运动训练;截瘫肢体综合训练;物理疗法;毫针刺法;作业疗法;超声波联合治疗
15579	O303康复科	2024-12-07	2024-12-30	3585934	卢云山	1	53Y	关节僵硬	2型糖尿病;肾结石;前列腺结石;心功能不全;涉及使用其他康复操作的医疗;骨折术后	好转	蒋松鹤	郑余银	邹恩苗	运动训练;关节松动法;低频脉冲电治疗;针刺;超声波联合治疗;艾灸
15580	O303康复科	2024-12-02	2024-12-30	3586063	黄松龙	1	77Y	关节僵硬	肩胛骨骨折;室性期前收缩;肋骨多处骨折;肺挫伤;气胸;胸椎骨折;胸椎横突骨折;肺诊断性影像检查的异常所见;高血压;腔隙性脑梗死;老年性脑萎缩;前列腺钙化灶;后天性肾囊肿;阑尾术后;肺炎;涉及使用其他康复操作的医疗;人工膝关节;腰椎术后;前列腺术后	好转	蒋松鹤	卢君艳	高丽萍	针刺;中药熏治;运动训练;作业疗法;关节松动法
15581	O303康复科	2024-12-01	2024-12-30	3586068	黄卓帆	1	14Y	关节僵硬	尺骨下端骨折;眶骨骨折;骨折术后;涉及使用其他康复操作的医疗	好转	蒋松鹤	郑余银	金韵	作业疗法;关节松动法;低频脉冲电治疗;运动训练
15582	O303康复科	2024-11-18	2024-12-30	3586071	汪强清	1	53Y	关节僵硬	髋关节脱位;髋臼骨折;腓骨头骨折;腰骶神经损伤;涉及使用其他康复操作的医疗;骨折术后;手术后状态，其他特指的	好转	蒋松鹤	郑余银	邹恩苗	运动训练;超声波联合治疗;针刺;关节松动法;低频脉冲电治疗;磁热疗
15583	O303康复科	2024-11-19	2024-12-30	3586088	涂泽帆	1	16Y	关节僵硬	马尾损伤;足舟骨骨折;髋臼骨折;腰椎骨折;腔隙性脑梗死;涉及使用其他康复操作的医疗;骨折术后	好转	蒋松鹤	郑余银	邹恩苗	运动训练;关节松动法;低频脉冲电治疗;超声波联合治疗
15584	O303康复科	2024-11-24	2024-12-31	3586386	张先亮	1	64Y	创伤性截瘫	胸部脊髓损伤;神经源性膀胱;神经源性肠;胸椎压缩性骨折;腰椎压缩性骨折;多发性腰椎骨折;肋骨多处骨折;主动脉钙化;冠状循环诊断性影像检查异常所见;创伤性胸腔积液;创伤性气胸;肠道感染;肾结石;后天性肾囊肿;前列腺结石;下肢静脉血栓形成;涉及使用其他康复操作的医疗	好转	蒋松鹤	卢君艳	郑力宇	截瘫肢体综合训练;运动训练;针灸;低频脉冲电治疗
15585	O303康复科	2024-12-10	2024-12-31	3586508	陈建娇	2	48Y	肘关节僵硬	尺骨桡骨闭合性骨折;尺桡关节脱位;脑挫伤;创伤性颅内血肿;眶骨骨折;面部软组织挫伤;上颌窦筛窦炎;涉及使用其他康复操作的医疗;骨折术后;脑术后	好转	蒋松鹤	卢君艳	高丽萍	关节松动法;运动训练;物理疗法;作业疗法;超声波联合治疗;低频脉冲电治疗
15586	O303康复科	2024-12-03	2024-12-31	3586829	金君凡	1	41Y	膝关节僵硬	髌骨骨折;膝关节后十字韧带损伤;内侧半月板损伤;肺诊断性影像检查的异常所见;肺大疱;涉及使用其他康复操作的医疗	好转	蒋松鹤	卢君艳	郑力宇	关节松动法;运动训练;低频脉冲电治疗;针刺;超声波联合治疗
序号	出院科室	入院日期	出院日期	病案号	病人	性别	年龄	主诊断	非主诊断	转归	主任	主治	住院	手术
					姓名					情况	医师	医师	医师	名称
2001	L113内分泌科	2025-06-10	2025-06-12	3658080	林缨	2	50Y	骨质疏松	跟骨骨折	好转	潘优津	潘优津	徐静
2002	L113内分泌科	2025-06-09	2025-06-16	3659576	徐崇平	2	62Y	2型糖尿病	高血压;下肢动脉粥样硬化;非酒精性脂肪性肝炎;骨质疏松;肺部感染;慢性胃炎;肺肿物;陈旧性肋骨骨折;椎间盘突出;脊柱血管瘤;颈动脉硬化	好转	潘优津	潘优津	徐静	胃镜检查;结肠镜检查
2003	L113内分泌科	2025-06-16	2025-06-21	3661732	卢月华	2	67Y	2型糖尿病性前期微白蛋白尿	高脂血症;下肢动脉粥样硬化;重度骨质疏松;腰椎骨折;脂肪肝;腰椎间盘突出;脊椎退行性病变;多发性脑梗死;甲状腺结节;甲状腺术后;子宫切除术后状态;2型糖尿病性视网膜病变;颈动脉硬化	好转	钱掩映	吴笑英	吴笑英
2004	L113内分泌科	2025-06-18	2025-06-26	3664344	潘跃萱	2	57Y	糖尿病	下肢软组织感染;高脂血症;下肢动脉粥样硬化;脂肪肝;骨质疏松;骨折术后恢复期;甲状腺术后;非毒性多个甲状腺结节;低钾血症	好转	潘优津	施梦特	徐静
2005	L113内分泌科	2025-06-15	2025-06-29	3665517	郑德权	1	69Y	低血糖性昏迷	乳酸性酸中毒;肺部感染;I型呼吸衰竭;急性肾功能不全;2型糖尿病伴血糖控制不佳;高血压;颈动脉硬化;肋骨骨折;下肢动脉粥样硬化	好转	吴朝明	周盈盈	周盈盈
2006	L113内分泌科	2025-06-23	2025-06-30	3666142	郑崇纬	1	31Y	2型糖尿病性胃轻瘫	高血压;高脂血症;颈动脉硬化;肺肿物;甲状腺结节;2型糖尿病性大量白蛋白尿;2型糖尿病性视网膜病变;2型糖尿病性周围神经病;2型糖尿病性酮症;骨折术后;慢性胃炎;前列腺结石;胆汁反流	好转	吴朝明	周盈盈	周盈盈
2007	L115肿瘤放化疗科	2025-01-02	2025-01-06	3588590	胡美景	2	45Y	手术后恶性肿瘤化学治疗	直肠恶性肿瘤;肺肿物;肾结石;肩撞击综合征;锁骨肩峰端骨折	好转	吴剑	吴剑	李平平	静脉注射化疗药物
2008	L115肿瘤放化疗科	2025-01-06	2025-01-08	3589772	徐秋艳	2	50Y	恶性肿瘤维持性化学治疗	卵巢恶性肿瘤;胸腔继发恶性肿瘤;肺肿物;肝囊肿;陈旧性胸椎骨折	好转	吴剑	吴剑	李平平	静脉注射化疗药物
2009	L115肿瘤放化疗科	2025-01-08	2025-01-08	3589796	包长华	1	58Y	恶性肿瘤免疫治疗	食管恶性肿瘤;慢性胃炎;反流性食管炎;窦性心动过速;肺肿物;陈旧性肺结核;肺气肿;陈旧性肋骨骨折;前列腺钙化灶;后天性肾囊肿;心脏和冠状循环诊断性影像检查的异常所见	好转	吴剑	吴剑	李平平	静脉注射免疫制剂治疗;PICC管去除
2010	L115肿瘤放化疗科	2024-12-10	2025-01-13	3591377	章福美	1	50Y	恶性肿瘤维持性化学治疗	肺恶性肿瘤;骨继发恶性肿瘤;脊髓损伤;截瘫;神经源性肠;神经源性膀胱;运动障碍;病理性骨折，不可归类在他处者;后天性肾囊肿;前列腺结石;下肢静脉血栓形成	好转	吴剑	吴剑	林瑞芳	静脉注射化疗药物;静脉注射化疗药物
2011	L115肿瘤放化疗科	2025-01-07	2025-01-14	3592061	何圣菊	2	53Y	恶性肿瘤靶向治疗	肺恶性肿瘤;重度贫血;肺部感染;腰椎骨折;肝囊肿;肺肿物;脊柱侧弯;骨继发恶性肿瘤	好转	陈文俊	吴聪聪	周盈盈2
2012	L115肿瘤放化疗科	2025-01-11	2025-01-15	3592190	温兴顺	1	75Y	肝占位性病变	肺占位性病变;高血压;2型糖尿病;慢性胃炎;白内障;颈动脉硬化;下肢动脉粥样硬化;骨折术后	好转	陈文俊	陈文俊	周盈盈2
2013	L115肿瘤放化疗科	2024-12-16	2025-01-17	3593147	施正桂	2	53Y	肺恶性肿瘤	肺继发恶性肿瘤;恶性肿瘤靶向治疗;肺门淋巴结继发恶性肿瘤;纵隔淋巴结继发恶性肿瘤;骨继发恶性肿瘤;脑继发恶性肿瘤;病理性骨折，不可归类在他处者;肺部感染;高血压;贫血;甲状腺结节;乳腺增生;单纯性肾囊肿;子宫术后	好转	吴剑	吴剑	林瑞芳
2014	L115肿瘤放化疗科	2025-01-29	2025-01-30	3598816	包长华	1	58Y	恶性肿瘤免疫治疗	食管恶性肿瘤;慢性胃炎;反流性食管炎;肺肿物;肺气肿;陈旧性肺结核;陈旧性肋骨骨折;前列腺钙化灶;后天性肾囊肿;窦性心动过速;心脏异常阴影	好转	吴剑	吴剑	李平平	静脉注射免疫制剂治疗
2015	L115肿瘤放化疗科	2025-01-26	2025-01-30	3598817	金建源	1	60Y	胰腺恶性肿瘤	恶性肿瘤维持性化学治疗;高血压;2型糖尿病;肝囊肿;后天性肾囊肿;肺气肿;骨折术后	好转	陈文俊	吴聪聪	吴聪聪	静脉注射化疗药物
2024	L115肿瘤放化疗科	2024-11-19	2025-02-03	3601036	沈上力	1	69Y	手术后恶性肿瘤化学治疗	恶性肿瘤靶向治疗;横结肠恶性肿瘤;腹腔继发恶性肿瘤;肺继发恶性肿瘤;腹膜继发恶性肿瘤;肠梗阻;肠道感染;肺栓塞;陈旧性肋骨骨折;胸腔积液;包裹性腹腔积液;食管裂孔疝;糜烂性胃炎;下肢动脉粥样硬化	好转	陈文俊	吴聪聪	周盈盈2	静脉注射化疗药物;静脉注射化疗药物;静脉注射化疗药物;分子靶向治疗;分子靶向治疗;分子靶向治疗;胸腔内注射;胸腔内注射;胸腔内注射;胸腔内注射;胸腔闭式引流术
2025	L115肿瘤放化疗科	2025-01-27	2025-02-04	3601148	徐秋艳	2	50Y	恶性肿瘤维持性化学治疗	卵巢恶性肿瘤;胸腔继发恶性肿瘤;肾功能不全;肺肿物;肝囊肿;骨折术后	好转	吴剑	吴剑	李平平	静脉注射化疗药物
2022	L115肿瘤放化疗科	2025-01-13	2025-02-06	3602383	章福美	1	50Y	恶性肿瘤维持性化学治疗	肺恶性肿瘤;骨继发恶性肿瘤;脊髓损伤;截瘫;神经源性膀胱;神经源性肠;运动障碍;化疗后骨髓抑制;病理性骨折，不可归类在他处者;后天性肾囊肿;前列腺结石;下肢静脉血栓形成	好转	吴剑	吴剑	李平平	静脉注射化疗药物
2023	L115肿瘤放化疗科	2025-01-06	2025-02-11	3605590	胡久平	1	64Y	恶性肿瘤维持性化学治疗	恶性肿瘤靶向治疗;食管恶性肿瘤;腹膜后淋巴结继发恶性肿瘤;肺脓肿伴有肺炎;继发性肾上腺皮质功能减退症;低蛋白血症;骨髓抑制;肝功能检查的异常结果;液气胸;肠功能紊乱;慢性胃炎;高血压;前列腺增生;前列腺囊肿;腰椎骨折;鞘膜积液;腹腔积液;前列腺结石;痔不伴有并发症	好转	陈文俊	吴聪聪	周盈盈2	静脉注射化疗药物;分子靶向治疗
2025	L115肿瘤放化疗科	2025-02-22	2025-02-23	3608055	包长华	1	58Y	恶性肿瘤免疫治疗	食管恶性肿瘤;慢性胃炎;反流性食管炎;肺肿物;窦性心动过速;陈旧性肺结核;肺气肿;陈旧性肋骨骨折;前列腺钙化灶;后天性肾囊肿;室间隔肥大	好转	吴剑	吴剑	林瑞芳	静脉注射免疫制剂治疗
2025	L115肿瘤放化疗科	2025-02-17	2025-02-23	3608107	章福美	1	50Y	恶性肿瘤维持性化学治疗	肺恶性肿瘤;骨继发恶性肿瘤;脊髓损伤;截瘫;神经源性膀胱;神经源性肠;运动障碍;化疗后骨髓抑制;病理性骨折，不可归类在他处者;后天性肾囊肿;前列腺结石	好转	吴剑	吴剑	林瑞芳	静脉注射化疗药物
2022	L115肿瘤放化疗科	2025-02-03	2025-03-03	3611851	高崇光	1	58Y	恶性肿瘤免疫治疗	膀胱恶性肿瘤;软组织感染;泌尿道感染;骨继发恶性肿瘤;肝继发恶性肿瘤;肿瘤性病理性骨折;慢性顽固性疼痛;输尿管梗阻;低蛋白血症;椎管狭窄;急性肾功能不全;高钾血症	好转	谢聪颖	朱宝玲	朱宝玲	超声引导下躯干软组织病损抽吸术;静脉注射免疫制剂治疗
2023	L115肿瘤放化疗科	2025-03-03	2025-03-05	3612714	胡美景	2	46Y	骨髓抑制	直肠恶性肿瘤;肝功能不全;肾结石;肩撞击综合征;锁骨肩峰端骨折	好转	吴剑	吴剑	林瑞芳
2024	L115肿瘤放化疗科	2025-03-03	2025-03-08	3614146	高崇光	1	58Y	急性肾功能不全	高钾血症;膀胱恶性肿瘤;骨继发恶性肿瘤;肝继发恶性肿瘤;肿瘤性病理性骨折;慢性顽固性疼痛;肾积水伴输尿管狭窄;后天性肾囊肿;肾结石;椎管狭窄;前列腺增生;肾上腺结节性增生;输尿管支架置入术后	好转	谢聪颖	朱宝玲	朱宝玲
2025	L115肿瘤放化疗科	2025-02-22	2025-03-09	3614508	徐贤早	1	57Y	扁桃体恶性肿瘤	颈部淋巴结继发恶性肿瘤;为肿瘤化学治疗疗程;低钾血症;慢性乙型病毒性肝炎;睡眠障碍;骨折术后	好转	谢聪颖	朱宝玲	朱宝玲	静脉注射化疗药物
2026	L115肿瘤放化疗科	2025-01-28	2025-03-15	3616864	王勤	2	54Y	肺继发恶性肿瘤	脑继发恶性肿瘤;肺恶性肿瘤;骨继发恶性肿瘤;颈部淋巴结继发恶性肿瘤;肾上腺肿物;为肿瘤化学治疗疗程;恶性肿瘤靶向治疗;肺气肿;高脂血症;肿瘤性病理性骨折;颈椎半脱位;颈椎间盘突出;颈椎退行性病变;颈椎椎管狭窄;脊髓变性	好转	吴剑	吴剑	林瑞芳	纤维支气管镜检查伴肺泡灌洗术;支气管镜下肺活检;静脉注射化疗药物;分子靶向治疗
2027	L115肿瘤放化疗科	2025-03-08	2025-03-15	3617084	杨连香	2	60Y	直肠恶性肿瘤	恶性肿瘤免疫治疗;恶性肿瘤靶向治疗;肺部继发性恶性肿瘤;骨继发恶性肿瘤;病理性骨折，不可归类在他处者;皮肤继发性恶性肿瘤;2型糖尿病;后天性肾囊肿	好转	吴剑	吴剑	林瑞芳	皮肤和皮下组织的活组织检查;静脉注射免疫制剂治疗
2028	L115肿瘤放化疗科	2025-02-15	2025-03-15	3617088	胡久平	1	64Y	食管恶性肿瘤	腹膜后淋巴结继发恶性肿瘤;呼吸心跳骤停;多脏器功能衰竭;肺部感染;胸腔积液;液气胸;操作后皮下气肿;轻度贫血;慢性胃炎;肠功能紊乱;皮质醇增多症[库欣综合征];高血压;心包积液;腹腔积液;前列腺增生;前列腺结石;前列腺囊肿;腰椎骨折;鞘膜积液;双侧腹股沟疝;肾盂积水，其他的	死亡	陈文俊	陈文俊	周盈盈2	胸腔闭式引流术
2029	L115肿瘤放化疗科	2025-03-15	2025-03-15	3617157	包长华	1	58Y	恶性肿瘤免疫治疗	食管恶性肿瘤;慢性胃炎;反流性食管炎;肺肿物;窦性心动过速;陈旧性肺结核;肺气肿;肋骨骨折;前列腺钙化灶;后天性肾囊肿;室间隔肥大	好转	吴剑	吴剑	林瑞芳	静脉注射免疫制剂治疗
2030	L115肿瘤放化疗科	2025-03-17	2025-03-17	3618027	高崇光	1	58Y	恶性肿瘤免疫治疗	膀胱恶性肿瘤;骨继发恶性肿瘤;肝继发恶性肿瘤;肿瘤性病理性骨折;椎管狭窄;慢性顽固性疼痛;输尿管扩张;肾盂积水;急性肾功能不全;后天性肾囊肿;肾结石;前列腺增生;肾上腺结节性增生	好转	谢聪颖	朱宝玲	朱宝玲	静脉注射免疫制剂治疗
2031	L115肿瘤放化疗科	2025-03-25	2025-03-29	3623119	徐贤早	1	57Y	恶性肿瘤维持性化学治疗	扁桃体恶性肿瘤;颈部淋巴结继发恶性肿瘤;慢性乙型病毒性肝炎;睡眠障碍;骨折术后	好转	谢聪颖	朱宝玲	朱宝玲	静脉注射化疗药物
2032	L115肿瘤放化疗科	2025-03-29	2025-04-01	3624227	胡春玉	2	63Y	乳腺恶性肿瘤	骨继发恶性肿瘤;上颌窦炎;筛窦炎;子宫内膜息肉;陈旧性肋骨骨折;胸腔积液	好转	吴剑	吴剑	林瑞芳
2033	L115肿瘤放化疗科	2025-04-07	2025-04-07	3627029	高崇光	1	58Y	恶性肿瘤免疫治疗	膀胱恶性肿瘤;骨继发恶性肿瘤;肝继发恶性肿瘤;肿瘤性病理性骨折;椎管狭窄;慢性顽固性疼痛;输尿管扩张;肾盂积水;急性肾功能不全;后天性肾囊肿;肾结石;前列腺增生;肾上腺结节性增生;输尿管支架置入术后	好转	谢聪颖	朱宝玲	朱宝玲	抗肿瘤免疫治疗
2034	L115肿瘤放化疗科	2025-03-30	2025-04-17	3631261	余汝仙	1	66Y	脊柱继发恶性肿瘤	消化道恶性肿瘤;多部位淋巴结继发恶性肿瘤;肝继发恶性肿瘤;胰腺继发恶性肿瘤;为肿瘤化学治疗疗程;恶性肿瘤靶向治疗;脓毒血症;痛风;锁骨胸骨端骨折;高血压;动脉粥样硬化	好转	吴剑	吴剑	林瑞芳	椎骨活组织检查;静脉注射化疗药物;分子靶向治疗;脊髓和椎管结构的其他诊断性操作;皮肤和皮下组织的其他诊断性操作
2035	L115肿瘤放化疗科	2025-03-15	2025-04-19	3632286	王勤	2	54Y	恶性肿瘤放射治疗	恶性肿瘤靶向治疗;恶性肿瘤维持性化学治疗;肺恶性肿瘤;肺继发恶性肿瘤;脑继发恶性肿瘤;骨继发恶性肿瘤;颈部淋巴结继发恶性肿瘤;肾上腺肿物;肺气肿;高脂血症;病理性骨折，不可归类在他处者;颈椎间盘突出;颈椎退行性病变;椎管狭窄	好转	吴剑	吴剑	林瑞芳	静脉注射化疗药物;调强适形放射治疗[IMRT];分子靶向治疗
2036	L115肿瘤放化疗科	2025-04-28	2025-05-04	3638957	余汝仙	1	66Y	恶性肿瘤维持性化学治疗	恶性肿瘤靶向治疗;消化道恶性肿瘤;骨继发恶性肿瘤;多部位淋巴结继发恶性肿瘤;肝继发恶性肿瘤;胰腺继发恶性肿瘤;肱骨骨折;化疗后骨髓抑制;痛风;高血压;下肢动脉粥样硬化	好转	吴剑	吴剑	李平平	静脉注射化疗药物;分子靶向治疗
2037	L115肿瘤放化疗科	2025-05-07	2025-05-12	3642781	王勤	2	54Y	恶性肿瘤维持性化学治疗	恶性肿瘤靶向治疗;肺恶性肿瘤;脑继发恶性肿瘤;肺继发恶性肿瘤;骨继发恶性肿瘤;颈部淋巴结继发恶性肿瘤;肾上腺肿物;化疗后骨髓抑制;肺气肿;高脂血症;病理性骨折，不可归类在他处者;骨质破坏;颈椎间盘突出;颈椎退行性病变;椎管狭窄	好转	吴剑	吴剑	李平平	静脉注射化疗药物
2038	L115肿瘤放化疗科	2025-05-13	2025-05-18	3645671	谢平兴	1	51Y	肺恶性肿瘤	多部位淋巴结继发恶性肿瘤;脑继发恶性肿瘤;骨继发恶性肿瘤;阻塞性肺炎;胸腔积液;肺肿物;肺气肿;前列腺增生;陈旧性肋骨骨折	好转	陈文俊	陈文俊	孙霜霜
2039	L115肿瘤放化疗科	2025-05-25	2025-05-27	3650181	包长华	1	58Y	恶性肿瘤免疫治疗	食管恶性肿瘤;糜烂性胃炎;反流性食管炎;肺肿物;陈旧性肺结核;肺气肿;肋骨骨折;前列腺钙化灶;后天性肾囊肿;高脂血症;高尿酸血症;脂肪肝	好转	吴剑	吴剑	林瑞芳	静脉注射免疫制剂治疗
2040	L115肿瘤放化疗科	2025-05-27	2025-05-27	3650551	谢平兴	1	51Y	恶性肿瘤放射治疗	肺恶性肿瘤;多部位淋巴结继发恶性肿瘤;脑继发恶性肿瘤;骨继发恶性肿瘤;阻塞性肺炎;胸腔积液;肺肿物;肺气肿;前列腺增生;肋骨骨折	好转	陈文俊	陈文俊	孙霜霜	调强适形放射治疗[IMRT]
2041	L115肿瘤放化疗科	2025-06-08	2025-06-08	3656108	林加玲	1	60Y	肺恶性肿瘤	脑继发恶性肿瘤;淋巴结继发恶性肿瘤;为肿瘤化学治疗疗程;肝功能不全;骨盆骨折	好转	谢聪颖	朱宝玲	朱宝玲	静脉注射化疗药物
2042	L115肿瘤放化疗科	2025-04-18	2025-06-11	3657211	徐贤早	1	57Y	恶性肿瘤放射治疗	恶性肿瘤维持性化学治疗;扁桃体恶性肿瘤;颈部淋巴结继发恶性肿瘤;放射性咽炎;化疗后骨髓抑制;慢性乙型病毒性肝炎;睡眠障碍;骨折术后	好转	谢聪颖	朱宝玲	朱宝玲	调强适形放射治疗[IMRT];静脉注射化疗药物
2043	L115肿瘤放化疗科	2025-04-08	2025-06-18	3660662	周叶抗	1	76Y	食管恶性肿瘤	骨继发恶性肿瘤;恶性肿瘤放射治疗;恶性肿瘤维持性化学治疗;肺肿物;肺门淋巴结继发恶性肿瘤;低蛋白血症;低色素性贫血;慢性心力衰竭;放疗后骨髓抑制;病理性骨折，不可归类在他处者;门静脉高压;肾功能不全;肝功能不全;高尿酸血症;慢性胃炎;十二指肠溃疡;心房颤动;后天性肾囊肿	好转	吴剑	吴剑	李平平	胃镜检查;调强适形放射治疗[IMRT];结肠镜检查;耳镜检查
2044	L115肿瘤放化疗科	2025-06-09	2025-06-22	3662043	高崇光	1	58Y	肾功能不全	高钾血症;恶性肿瘤免疫治疗;膀胱恶性肿瘤;骨继发恶性肿瘤;肝继发恶性肿瘤;病理性骨折，不可归类在他处者;椎管狭窄;慢性顽固性疼痛;输尿管狭窄;输尿管扩张;肾盂积水，其他的;后天性肾囊肿;肾结石;前列腺增生;腹部诊断性影像异常	好转	谢聪颖	朱宝玲	朱宝玲	静脉注射免疫制剂治疗
2045	L115肿瘤放化疗科	2025-06-15	2025-06-22	3662484	徐秋艳	2	50Y	卵巢恶性肿瘤	胸腔继发恶性肿瘤;恶性心包积液;肺部感染;贫血;白细胞减少;肝功能不全;肾功能不全;胸椎骨折;肺肿物;后天性肾囊肿	好转	吴剑	吴剑	李平平	超声引导下心包穿刺引流术
2046	L203耳鼻咽喉科/眼科	2025-03-31	2025-04-01	3624185	罗裕江	1	19Y	鼻骨骨折	鼻开放性伤口	好转	夏思文	刘凡理	尤朝国	鼻骨折闭合性复位术
2047	L203耳鼻咽喉科/眼科	2025-04-08	2025-04-08	3627495	郭献庆	1	32Y	取除骨折内固定装置	盲，单眼	其他	韩晓辉	韩晓辉	林达	去除面骨内固定装置
2048	L203耳鼻咽喉科/眼科	2025-04-14	2025-04-16	3630924	翁宪如	1	68Y	前列腺增生	PSA升高;后天性肾囊肿;肾病综合征;肝囊肿;胆囊息肉;胆囊结石;慢性支气管炎;肺气肿;下肢动脉粥样硬化;慢性胃炎;十二指肠球部溃疡;结肠息肉;椎管内囊肿;陈旧性肋骨骨折	治愈	陈映鹤	王怡君	柯润疆	超声引导下前列腺穿刺活检
2049	L203耳鼻咽喉科/眼科	2025-04-20	2025-04-21	3632940	蔡瑞新	1	18Y	鼻骨骨折	鼻开放性伤口	好转	倪丽艳	郑博	詹翔	鼻骨折闭合性复位术
2050	L203耳鼻咽喉科/眼科	2025-04-23	2025-04-24	3634603	王浩楠	1	20Y	鼻骨骨折	鼻开放性伤口	治愈	夏思文	刘凡理	司马林源	鼻骨折闭合性复位术
2051	L203耳鼻咽喉科/眼科	2025-05-12	2025-05-13	3643318	雷常珍	2	50Y	鼻骨骨折	上颌骨骨折;鼻损伤	好转	夏思文	夏思文	曾文件	鼻骨折闭合性复位术
2052	L203耳鼻咽喉科/眼科	2025-05-25	2025-06-02	3653323	钱新海	1	26Y	颈椎骨折	鼻骨骨折	好转	项松洁	项松洁	项松洁	前入路颈椎融合术;鼻骨折闭合性复位术;颈椎间盘切除术;钛合金脊椎融合物置入术;2-3个椎骨融合或再融合
2053	L203耳鼻咽喉科/眼科	2025-06-09	2025-06-10	3656748	虞恩赞	1	14Y	鼻骨骨折		好转	夏思文	夏思文	尤朝国	鼻骨折闭合性复位术
2054	L203耳鼻咽喉科/眼科	2025-06-09	2025-06-10	3656757	卫云飞	1	32Y	鼻骨骨折		好转	项松洁	项松洁	尤朝国	鼻骨折闭合性复位术
2055	L203耳鼻咽喉科/眼科	2025-06-11	2025-06-11	3657865	谢小春	2	40Y	鼻骨骨折		治愈	夏思文	刘凡理	司马林源	鼻骨折闭合性复位术
2056	L203耳鼻咽喉科/眼科	2025-06-15	2025-06-16	3659791	项雨铖	1	9Y	鼻骨骨折		治愈	夏思文	刘凡理	司马林源
2057	L203耳鼻咽喉科/眼科	2025-06-16	2025-06-16	3659846	黄应芳	2	51Y	鼻骨骨折		好转	夏思文	夏思文	司马林源	鼻骨折闭合性复位术
2058	L203耳鼻咽喉科/眼科	2025-06-16	2025-06-16	3659850	汤寿长	1	55Y	鼻骨骨折		治愈	夏思文	夏思文	司马林源	鼻骨折闭合性复位术
2059	L203耳鼻咽喉科/眼科	2025-06-16	2025-06-16	3659851	王传璨	1	14Y	鼻骨骨折		治愈	夏思文	刘凡理	司马林源	鼻骨折闭合性复位术
2060	L203耳鼻咽喉科/眼科	2025-06-13	2025-06-18	3660627	钱友得	1	59Y	视神经损伤	多处挫伤;眶骨骨折;肋骨骨折;骨盆骨折;胸骨骨折	治愈	倪丽艳	刘学军	王晓琼	视神经减压术;鼻内窥镜下多个鼻窦开窗术
2061	L203耳鼻咽喉科/眼科	2025-06-17	2025-06-18	3660850	罗翠云	2	54Y	鼻骨骨折		好转	项松洁	项松洁	尤朝国	鼻骨折闭合性复位术
2062	L203耳鼻咽喉科/眼科	2025-06-24	2025-06-24	3663503	李茅茅	2	29Y	鼻骨骨折	鼻开放性伤口	好转	倪丽艳	叶余丰	王晓琼
2063	L203耳鼻咽喉科/眼科	2025-06-25	2025-06-25	3664125	吴国强	1	19Y	鼻骨骨折	鼻开放性伤口	治愈	夏思文	夏思文	司马林源	鼻骨折闭合性复位术
2064	L203眼耳鼻咽喉科	2025-01-05	2025-01-06	3588645	邓海波	1	33Y	鼻骨骨折		治愈	倪丽艳	郑博	郑博	鼻骨折闭合性复位术
2065	L203眼耳鼻咽喉科	2025-01-13	2025-01-14	3591943	郑迦勒	1	21Y	鼻骨骨折		好转	夏思文	夏思文	夏思文	鼻骨折闭合性复位术
2066	L203眼耳鼻咽喉科	2025-01-20	2025-01-21	3594874	方桂梅	2	44Y	鼻骨骨折	鼻开放性伤口	好转	倪丽艳	刘凡理	尤朝国	鼻骨折闭合性复位术
2067	L203眼耳鼻咽喉科	2025-02-19	2025-02-20	3607218	孔林子	1	20Y	鼻骨骨折		治愈	夏思文	夏思文	夏思文	鼻骨折闭合性复位术
2068	L203眼耳鼻咽喉科	2025-02-23	2025-02-24	3608682	李希两	1	61Y	鼻骨骨折		治愈	夏思文	刘凡理	司马林源	鼻骨折闭合性复位术
2069	L203眼耳鼻咽喉科	2025-03-16	2025-03-17	3617682	张杨瑞	1	12Y	鼻骨骨折		好转	倪丽艳	倪丽艳	尤朝国	鼻骨折闭合性复位术
2070	L203眼耳鼻咽喉科	2025-03-07	2025-03-17	3617750	胡小华	2	48Y	胫骨平台骨折	锁骨肩峰端骨折;腓骨近端骨折;鼻骨骨折;面部软组织挫伤;鼻中隔骨折;四根以上肋骨骨折不伴第一肋骨骨折;创伤性鼻窦积血	好转	倪丽艳	倪丽艳	尤朝国	胫骨骨折切开复位钢板内固定术;胫骨人工骨植骨术;鼻骨折闭合性复位术
2071	L203眼耳鼻咽喉科	2025-03-18	2025-03-19	3618653	王展一	1	28Y	鼻骨骨折		治愈	倪丽艳	倪丽艳	潘豪来	鼻骨折闭合性复位术
2072	L203眼耳鼻咽喉科	2025-03-25	2025-03-26	3622101	陈昱汝	2	4Y	鼻骨骨折		好转	夏思文	夏思文	尤朝国	鼻骨折闭合性复位术
2073	L205重症医学科	2025-01-10	2025-01-20	3594482	陈时海	1	61Y	创伤性蛛网膜下腔出血	脑挫伤;心脏停搏复苏成功;额骨骨折;头皮血肿;肌腱和肌肉损伤;肺部感染;高血压;肝囊肿;后天性肾囊肿	未愈	张晓隆	张晓隆	郝钰	颅内血肿清除术;呼吸机治疗[大于等于96小时];气管内插管
2074	L205重症医学科	2024-12-16	2025-01-22	3595584	张于尧	1	68Y	创伤性血气胸	失血性休克;消化道出血;连枷胸;肺挫伤;肺部感染;开放性上肢骨折;急性肾功能不全;创伤性指坏死;肋骨骨折;肩胛骨骨折;肱骨骨折;颈椎骨折C7;腰椎骨折;硬脑膜下积液;肘关节脱位;外耳挫伤;下肢静脉血栓形成;皮肤挫伤	好转	龚裕强	谢媚媚	谢媚媚	肺修补术;开胸止血术;经前臂截断术;皮肤和皮下坏死组织切除清创术;创面封闭式负压引流术（VSD);皮瓣转移术;肘脱位闭合性复位术;肋骨骨折切开复位内固定术;腹腔干动脉造影;肠系膜上动脉造影;胃十二指肠动脉栓塞术;腹主动脉造影;气管内插管;呼吸机治疗[大于等于96小时]
2075	L205重症医学科	2024-12-10	2025-01-30	3599216	陈通财	1	67Y	脊髓损伤	呼吸衰竭;肺部感染;急性四肢瘫;颈椎骨折;肝功能不全;泌尿道感染;低蛋白血症;静脉血栓形成	未愈	程碧环	吴海亚	吴海亚	锁骨下静脉穿刺术;暂时性气管切开术;呼吸机治疗[大于等于96小时];寰-枢椎融合术，后入路;椎体脊椎融合装置的置入;2-3个椎骨融合或再融合;颈椎脱位切开复位术;纤维支气管镜检查伴肺泡灌洗术;纤维支气管镜检查伴肺泡灌洗术;纤维支气管镜检查伴肺泡灌洗术
2076	L205重症医学科	2025-02-05	2025-03-04	3612502	方能建	1	66Y	创伤性硬膜下出血	脓毒性休克;多脏器功能衰竭;脑疝;脑挫伤;枕骨骨折;急性脊髓炎;脂肪肝;多发性肝囊肿	死亡	龚裕强	戴凌燕	戴凌燕	脑内血肿清除术;颅骨去骨瓣减压术;气管内插管;呼吸机治疗[大于等于96小时];颈内静脉穿刺中心静脉置管术;纤维支气管镜检查伴肺泡灌洗术
2077	L205重症医学科	2025-03-09	2025-03-13	3616470	黄兰香	2	81Y	创伤性膀胱破裂	高血压;腰椎压缩性骨折;肾功能不全;慢性支气管炎;胸腔积液;骨质疏松;后天性肾囊肿;下肢深静脉血栓形成	好转	龚裕强	王本极	王本极	膀胱裂伤缝合术;腹腔冲洗检查
2078	L205重症医学科	2025-02-11	2025-03-20	3619426	金美丽	2	70Y	椎动脉闭塞脑梗死	椎动脉损伤;基底动脉闭塞;枢椎椎弓根骨折[Hangman骨折];颈部脊髓损伤;颈椎椎管狭窄;颈椎后纵韧带骨化;多脏器功能衰竭;中枢性尿崩症;肺部感染;高血压;2型糖尿病;主动脉硬化;冠状动脉粥样硬化;肝囊肿	未愈	龚裕强	项建文	项建文	经皮颅内动脉取栓术;颅骨牵引术;椎动脉造影;两根血管操作;经皮椎动脉球囊扩张成形术;经皮椎动脉支架置入术;置入一根血管的支架;颈动脉造影术;颈椎后路单开门椎管减压术;脑室外引流[EVD]装置置入术;气管内插管;呼吸机治疗[大于等于96小时];暂时性气管切开术
2079	L205重症医学科	2025-03-26	2025-03-29	3623138	丁永聪	1	55Y	开放性颅脑损伤特重型	创伤性蛛网膜下腔出血;创伤性硬脑膜下出血;枕骨骨折;多脏器功能衰竭;创伤性凝血病;神经源性休克;心脏停搏复苏成功;头皮血肿;腹腔积液;肺气肿;后天性肾囊肿	死亡	龚裕强	项建文	戴洲豪	呼吸机治疗[小于96小时];气管内插管
2080	L205综合ICU	2025-03-07	2025-04-02	3625243	陶朝葆	1	52Y	开放性胫腓骨干骨折	急性上消化道出血;下肢软组织感染;骨炎;酒精性肝病;肝硬化失代偿期;胸腔积液;腹水;肝肾综合征;肝肺综合征;肝性脑病;I型呼吸衰竭;低蛋白血症;下肢静脉血栓形成	好转	林孟相	项建文	戴洲豪	胫骨骨折切开复位钢针内固定术;皮肤和皮下坏死组织切除清创术;创面封闭式负压引流术（VSD);胫骨外固定术;骨空隙骨水泥填充术;皮肤和皮下坏死组织切除清创术;骨空隙骨水泥填充术;创面封闭式负压引流术（VSD);皮瓣预制术;创面封闭式负压引流术（VSD);游离皮瓣移植术
2081	L205综合ICU	2025-03-27	2025-04-07	3627089	黄祥安	1	63Y	植物类中毒	多脏器功能衰竭;成人型呼吸窘迫综合征;急性肾功能不全;代谢性酸中毒;踝骨骨折;胸腔积液;脂肪肝;前列腺增生	未愈	龚裕强	王本极	李慧3	连续性肾脏替代治疗[CRRT];气管内插管;颈内静脉穿刺中心静脉置管术;无创呼吸机辅助通气(高频通气[HFPPV]);呼吸机治疗[小于96小时]
2082	L205综合ICU	2025-04-08	2025-04-10	3628426	张玉珠	2	71Y	闭合性颅脑损伤特重型	创伤性硬脑膜下血肿;创伤性蛛网膜下出血;颞骨骨折;脑疝;创伤性凝血病;呼吸心跳骤停;心脏停搏复苏成功	未愈	龚裕强	郭献阳	郭献阳	呼吸机治疗[小于96小时];颈内静脉穿刺中心静脉置管术
2083	L205综合ICU	2025-03-27	2025-04-11	3628781	刘洪情	1	46Y	颈部脊髓损伤	颈椎骨折C4;颈椎滑脱;恢复期，其他治疗后的;缺氧缺血性脑病;肺部感染;呼吸衰竭;低蛋白血症;肌腱和肌肉损伤;颈椎间盘突出;胸骨骨折;胸腔积液;甲状腺结节;脂肪肝;肝功能不全	死亡	龚裕强	戴凌燕	戴凌燕	气管内插管;锁骨下静脉穿刺中心静脉置管术;气管镜肺灌洗术;呼吸机治疗[小于96小时]
2084	L205综合ICU	2025-04-19	2025-04-20	3633232	毛中兰	2	48Y	开放性颅脑损伤特重型	创伤性硬膜下出血;脑疝;脑挫伤;创伤性蛛网膜下腔出血;颅腔积气;颞骨骨折;头皮血肿;呼吸衰竭;循环衰竭;肋骨骨折;陈旧性肺结核	死亡	龚裕强	郭献阳	郭献阳	脑膜切开伴硬脑膜下腔血肿清除术;呼吸机治疗[小于96小时];气管内插管;颅骨去骨瓣减压术
2085	L205综合ICU	2025-03-17	2025-04-22	3633604	蒋钦万	1	82Y	重症肺炎	呼吸衰竭;脓毒性休克;低蛋白血症;痛风;高血压;2型糖尿病;肾功能不全;胃溃疡;胸椎骨折T11/T12;老年性脑萎缩;多发性脑梗死;后天性肾囊肿	死亡	龚裕强	戴凌燕	戴凌燕	气管内插管;呼吸机治疗[大于等于96小时];气管镜肺灌洗术;连续性肾脏替代治疗[CRRT]
2086	L205综合ICU	2025-04-22	2025-04-24	3634805	吴三豹	1	66Y	腰椎骨折	骨盆骨折;失血性休克;中度贫血;继发性血小板减少;肌腱和肌肉损伤;踝关节骨折;后天性肾囊肿;前列腺钙化灶;动脉粥样硬化;退行性主动脉瓣疾患;下肢软组织感染;横纹肌溶解症	未愈	戴凌燕	高叶	高叶	经导管髂内动脉栓塞术;髂动脉造影;髂内动脉插管术;皮肤和皮下组织非切除性清创
2087	L205综合ICU	2025-04-17	2025-04-24	3634809	吴长华	1	43Y	桡骨骨折	眶骨骨折;颧骨骨折;上颌骨骨折;乙肝表面抗原携带者;肱骨骨折;尺骨骨折;视神经损伤;额骨骨折;蝶骨骨折;髂骨骨折;肝挫伤;腹腔积血;创伤性湿肺	治愈	龚裕强	郭献阳	郭献阳	桡骨骨折切开复位钢板内固定术;肘关节韧带修补术;骨空隙骨水泥填充术;皮肤缝合术;眶骨骨折切开复位内固定术;上颌骨骨折切开复位内固定术;皮肤缝合术;鼻内窥镜下多个鼻窦开窗术;视神经减压术;眶减压术
2088	L205综合ICU	2025-04-23	2025-04-27	3635976	王芝津	1	83Y	失血性休克	循环衰竭;凝血功能障碍;代谢性酸中毒;肾结石;后天性肾囊肿;胫后动脉闭塞;骨折术后	未愈	龚裕强	郭献阳	郭献阳	连续性肾脏替代治疗[CRRT];股静脉穿刺置管术;颈内静脉穿刺中心静脉置管术;呼吸机治疗[小于96小时];气管内插管
2089	L205综合ICU	2025-04-27	2025-04-28	3636528	黄顺有	1	74Y	心脏停搏复苏成功	窒息;肺部感染;进行性核上性麻痹;多发性脑梗死;老年性脑萎缩;肋骨骨折;冠状动脉粥样硬化;肾结石;膀胱结石;低钾血症;低蛋白血症;肝功能检查的异常结果	未愈	龚裕强	林孟相	林孟相	呼吸机治疗[小于96小时];气管内插管;锁骨下静脉穿刺中心静脉置管术
2090	L205综合ICU	2025-04-27	2025-05-09	3641955	李海林	1	87Y	脑动脉瘤破裂伴蛛网膜下腔出血	呼吸心跳骤停;心脏停搏复苏成功;缺氧缺血性脑病;中枢性呼吸衰竭;多脏器功能衰竭;具有心脏起搏器;高血压;前列腺恶性肿瘤;胃术后;胆囊术后;阑尾术后;骨折术后;肺部感染;脂肪肝;胸腔积液	死亡	龚裕强	戴凌燕	戴凌燕	脑血管造影;锁骨下静脉穿刺术;股静脉穿刺置管术;连续性肾脏替代治疗[CRRT];呼吸机治疗[大于等于96小时];大脑中动脉（MCA分叉部）动脉瘤栓塞术（AN）;气管内插管
2091	L205综合ICU	2025-05-14	2025-05-29	3651840	白明松	1	46Y	创伤性硬膜下出血	创伤性脑疝;呼吸衰竭;失血性休克;股骨骨折;创伤性骨筋膜室综合征;头皮血肿;锁骨骨折;髂骨骨折;髋臼骨折;股骨颈骨折;开放性胫腓骨干骨折;腘动脉损伤;肺部感染;下肢静脉肌间血栓形成;下肢动脉粥样硬化	未愈	龚裕强	傅蓓蓓	傅蓓蓓	大腿截断术;皮肤和皮下坏死组织切除清创术;带蒂皮瓣移植术;创面封闭式负压引流术（VSD);带蒂皮瓣迁徙术;颅骨去骨瓣减压术;脑内血肿清除术;气管内插管;呼吸机治疗[大于等于96小时];颈内静脉穿刺中心静脉置管术;纤维支气管镜检查伴肺泡灌洗术
2092	L205综合ICU	2025-05-27	2025-05-30	3651870	单存清	1	72Y	急性肾功能不全	I型呼吸衰竭;多脏器功能衰竭;循环衰竭;心肌损害;髂动脉栓塞;股动脉栓塞;代谢性酸中毒;高钾血症;高钠血症;高甘油三酯血症;肺部感染;2型糖尿病;脑积水;脑出血后遗症;高血压;脂肪肝;后天性肾囊肿;肱骨骨折	未愈	龚裕强	陈德准	陈德准	呼吸机治疗[大于等于96小时];气管内插管
2093	L205综合ICU	2025-05-29	2025-06-05	3654851	骆小虎	1	47Y	基底节出血	硬膜外血肿;前臂骨折;蛛网膜下出血;顶骨骨折;头皮血肿;低蛋白血症;贫血	好转	林孟相	林孟相	林孟相	颅内血肿清除术;呼吸机治疗[大于等于96小时];气管内插管
2094	L205综合ICU	2025-05-26	2025-06-07	3656092	颜加波	1	49Y	局灶性大脑挫伤伴大量出血	创伤性脑疝;脑挫伤;创伤性硬膜下出血;颅骨骨折;头皮血肿;中枢性呼吸衰竭;肺部感染;胸腔积液;肺肿物	死亡	龚裕强	傅蓓蓓	傅蓓蓓	脑内血肿清除术;脑叶切除术;颅骨去骨瓣减压术;呼吸机治疗[大于等于96小时];气管内插管;硬脑膜补片修补术
2095	L205综合ICU	2025-06-10	2025-06-13	3658679	王岩仁	1	77Y	创伤性蛛网膜下腔出血	呼吸衰竭;多脏器功能衰竭;创伤性硬膜下出血;脑疝;脑挫伤;代谢性酸中毒;颅腔积气;颅骨骨折;颅底骨折;锁骨骨折;肋骨骨折;胆囊结石;前列腺增生;颈椎退行性病变;颈椎间盘突出	死亡	龚裕强	谢媚媚	李慧3	脑内血肿清除术;颅骨去骨瓣减压术;呼吸机治疗[小于96小时];气管内插管
2096	L205综合ICU	2025-06-16	2025-06-17	3660252	叶爱银	1	55Y	骨盆骨折	胸椎棘突骨折;四根以上肋骨骨折不伴第一肋骨骨折;锁骨胸骨端骨折;腰骶椎弓骨折;肺肿物	未愈	龚裕强	陈德准	陈德准	经导管髂内动脉栓塞术;髂动脉造影;腹主动脉造影
2097	L206心胸/整形/血管外科	2025-02-10	2025-04-07	3626669	王永友	1	84Y	胸椎多处骨折	创伤性胸腔积液;肺不张;肋骨多处骨折;强直性脊柱炎;2型糖尿病;输尿管结石;前列腺增生;脂肪肝;后天性肾囊肿;阑尾术后	好转	章岳峰	章岳峰	朱栋辉	胸椎骨折切开复位内固定术;超声引导下胸腔穿刺术;超声引导下胸腔穿刺术;胸腔闭式引流术;超声引导下胸腔穿刺术;超声引导下胸腔穿刺术;颈内静脉穿刺中心静脉置管术;呼吸机治疗[小于96小时]
2098	L206心胸/整形/血管外科	2025-03-29	2025-04-12	3628753	谢红叶	2	65Y	左肺上叶恶性肿瘤	特发性(原发性)高血压;慢性胃窦炎;脂肪肝;下肢动脉粥样硬化;老年性骨质疏松;颈椎间盘突出;后天性肾囊肿;肾结石;骨折术后	治愈	黄宪平	黄宪平	谷利中	胸腔镜下肺叶切除术;胸腔镜纵隔淋巴结清扫术;气管镜检查
2099	L206心胸/整形/血管外科	2025-04-08	2025-04-19	3631890	洪予宸	1	1Y	颅骨骨折	头皮血肿	好转	盛汉松	林逢春	林逢春
2100	L206心胸/整形/血管外科	2025-04-18	2025-04-22	3633393	项青花	2	77Y	右肺上叶恶性肿瘤	骨继发恶性肿瘤;阻塞性肺炎;肺不张;心房颤动;高血压;低蛋白血症;胸腔积液;心包积液;下肢动脉粥样硬化;腔隙性脑梗死;中枢神经系统脱髓鞘病;老年性脑萎缩;骨折术后	未愈	黄宪平	黄宪平	谷利中
2101	L206心胸/整形/血管外科	2025-04-04	2025-04-26	3635201	韩水河	1	49Y	创伤性血胸	四根以上肋骨骨折不伴第一肋骨骨折;肺挫伤;肾结石;后天性肾囊肿;颈椎退行性病变;颈椎间盘突出	治愈	黄宪平	谷利中	谷利中	胸腔镜下肺切开血肿清除术;胸腔闭式引流术;胸腔穿刺术
2102	L206心胸/整形/血管外科	2025-04-16	2025-04-27	3635766	陈启意	1	62Y	右肺恶性肿瘤	脊柱继发恶性肿瘤;肺气肿;脊柱侧弯;强直性脊柱炎;后天性肾囊肿;骨折术后;脑梗死后遗症;前列腺增生;脱髓鞘性脑病;椎管内占位性病变	好转	章岳峰	章岳峰	吴威佳	静脉注射化疗药物
2103	L206心胸/整形/血管外科	2025-04-16	2025-05-04	3638898	蔡正楷	1	73Y	四根以上肋骨骨折不伴第一肋骨骨折	创伤性血气胸;肌腱和肌肉损伤;胸椎横突骨折;老年性心脏瓣膜病;特发性(原发性)高血压;2型糖尿病;单侧腹股沟疝	好转	黄宪平	黄宪平	谷利中	超声引导下胸腔穿刺术
2104	L206心胸/整形/血管外科	2025-04-29	2025-05-06	3639904	陈久想	1	67Y	四根以上肋骨骨折不伴第一肋骨骨折	创伤性湿肺;肺挫伤;胸椎横突骨折;胸椎骨折;腰椎骨折;肝囊肿;后天性肾囊肿;前列腺增生;创伤性胸腔积液	好转	黄宪平	黄宪平	谷利中
2105	L206心胸/整形/血管外科	2025-05-04	2025-05-09	3641493	余登兰	2	56Y	肋骨多处骨折	创伤性胸腔积液;先天性主动脉瓣畸形;主动脉瓣狭窄;升主动脉扩张	好转	章岳峰	章岳峰	吴威佳
2106	L206心胸/整形/血管外科	2025-03-31	2025-05-10	3641515	朱善绍	1	59Y	开放性肱骨干骨折	创伤性脾破裂;创伤性血气胸;腹腔内出血;失血性休克;四根以上肋骨骨折不伴第一肋骨骨折;肾挫伤;多处挫伤;肺部感染;后天性肾囊肿;肾结石;前列腺增生;下肢静脉肌间血栓形成;下肢动脉粥样硬化;腔隙性脑梗死;脱髓鞘性脑病;心包积液	治愈	黄宪平	黄宪平	谷利中	肱骨骨折切开复位钢板内固定术;全脾切除术;开腹探查术;肌肉清创术;胸腔镜下肺切开血肿清除术;胰尾修补术;少于96小时连续的持续性侵入性机械性通气;气管内插管;骨移植术;游离皮肤移植
2107	L206心胸/整形/血管外科	2025-05-05	2025-05-11	3642320	林培法	1	61Y	两根肋骨骨折不伴第一肋骨骨折	肺挫伤;创伤性胸腔积液;脑缺血灶;肺肿物;慢性胃炎	治愈	黄宪平	黄宪平	谷利中	胃镜检查;结肠镜检查
2108	L206心胸/整形/血管外科	2025-05-11	2025-05-14	3643655	张子军	1	52Y	创伤性血气胸	肋骨骨折;肺不张;特发性(原发性)高血压	治愈	黄宪平	黄宪平	谷利中
2109	L206心胸/整形/血管外科	2025-05-08	2025-05-17	3645012	乔文全	1	48Y	髂静脉血栓形成	高血压;下肢深静脉血栓形成;肺肿物;脾大;肾结石;骨折术后;脂肪肝;多发性肝囊肿	治愈	郑祥韬	陈聪	陈魁	髂静脉支架置入术;髂静脉球囊血管成形术;下腔静脉滤器置入术;下肢静脉置管溶栓术;下肢静脉血栓切除术;下腔静脉造影;髂静脉造影;下肢静脉造影
2110	L206心胸/整形/血管外科	2025-05-18	2025-05-21	3647656	陈启意	1	62Y	手术后恶性肿瘤化学治疗	右肺恶性肿瘤;肺气肿;骨折术后;脑梗死后遗症;脊柱侧弯;强直性脊柱炎;下肢动脉粥样硬化;脱髓鞘性脑病;前列腺增生;后天性肾囊肿	好转	章岳峰	章岳峰	吴威佳	静脉注射化疗药物;颈内静脉穿刺中心静脉置管术
2111	L206心胸/整形/血管外科	2025-05-19	2025-05-25	3649119	周和鸣	2	70Y	两根肋骨骨折不伴第一肋骨骨折	创伤性胸腔积液;甲状腺结节;脂肪肝;胆囊结石;后天性肾囊肿;高血压;窦性心动过缓	好转	黄宪平	黄宪平	谷利中
2112	L206心胸/整形/血管外科	2025-05-23	2025-06-07	3655202	林招凤	2	67Y	锁骨骨折	肩胛骨骨折;肋骨多处骨折;创伤性胸腔积液;肺挫伤;颧弓骨折;颞骨骨折;硬脑膜下积液;头部的损伤;肌腱和肌肉损伤;2型糖尿病;二尖瓣反流;食管憩室;主动脉(瓣)关闭不全	治愈	章岳峰	章岳峰	吴威佳	锁骨骨折切开复位钢板内固定术;锁骨植骨术
2113	L206心胸/整形/血管外科	2025-04-29	2025-06-11	3657250	肖云雀	1	48Y	桡骨骨折	胫骨骨折;四根以上肋骨骨折不伴第一肋骨骨折;创伤性血胸;丘脑出血;上颌骨骨折;脂膜炎;肝挫伤;肾挫伤;肾上腺血肿;肺大疱;脂肪肝	治愈	黄宪平	黄宪平	谷利中	胫骨骨折切开复位内固定术;胸廓成形术;胸腔镜下胸腔切开止血术;桡骨骨折切开复位钢板内固定术;超声引导下胸腔穿刺术;踝关节骨折切开复位内固定术
2114	L206心胸/整形/血管外科	2025-06-05	2025-06-11	3657639	许明良	1	78Y	左肺恶性肿瘤	肺继发恶性肿瘤;纵隔淋巴结继发恶性肿瘤;肺大疱;老年性心脏瓣膜病;胆囊结石;后天性肾囊肿;骨折术后;肺恶性肿瘤个人史	治愈	黄宪平	黄宪平	谷利中	经支气管超声内镜纵隔淋巴结穿刺活检术;光导纤维支气管镜检查
2115	L206心胸/整形/血管外科	2025-06-08	2025-06-14	3658730	朱启敏	1	29Y	创伤性气胸	创伤性湿肺;肋骨骨折	好转	章岳峰	章岳峰	吴威佳	胸腔穿刺术
2116	L206心胸/整形/血管外科	2025-06-09	2025-06-15	3659228	林仁强	1	69Y	下肢动脉粥样硬化闭塞症	周围血管支架植入术后状态;颈动脉硬化;2型糖尿病;高血压;室性期前收缩;胸椎压缩性骨折;腹壁疝;腔隙性脑梗死;脑萎缩;前列腺结石	好转	邓超频	郑继行	郑继行
2117	L206心胸/整形/血管外科	2025-06-10	2025-06-16	3659441	周奶娒	2	73Y	下肢深静脉血栓形成	髂静脉血栓形成;腰椎间盘突出;腰椎术后;骨质疏松;陈旧性肋骨骨折;肺肿物;脂肪肝;后天性肾囊肿	好转	郑祥韬	陈聪	潘浩	下肢静脉造影
2118	L206心胸/整形/血管外科	2025-05-16	2025-06-18	3660375	金彩云	2	66Y	下肢深静脉血栓形成	开放性脑挫伤;创伤性脑血肿;创伤性蛛网膜下腔出血;皮下血肿;眶骨骨折;肺肿物;高血压;创伤性胸腔积液;冈上肌肌腱损伤;肩关节积液;胸椎退行性病变;脊柱血管瘤;颈椎间盘突出;腰椎退行性病变;骨囊肿;慢性乙型病毒性肝炎;腰椎间盘突出	好转	邓超频	艾鹏	郑继行	下腔静脉滤器置入术;下腔静脉造影;眶骨骨折切开复位内固定术;下肢静脉造影
2119	L206心胸/整形/血管外科	2025-06-09	2025-06-18	3660703	苏秀	2	52Y	肩胛骨骨折	肋骨骨折;腰椎骨折L2;胸椎压缩性骨折;腰椎间盘突出;创伤性胸腔积液	治愈	章岳峰	章岳峰	吴威佳	肩胛骨骨折切开复位钢板内固定术
2120	L206心胸/整形/血管外科	2025-06-14	2025-06-18	3660727	周加木	1	52Y	创伤性气胸	胸部损伤;肋骨骨折;心动过缓	治愈	章岳峰	章岳峰	吴威佳
2121	L206心胸/整形/血管外科	2025-06-19	2025-06-24	3663387	吕育进	1	62Y	液气胸	肋骨多处骨折;创伤性皮下气肿;肺肿物;贫血;甲状腺功能检查的异常结果;肾结石;食管术后	治愈	章岳峰	章岳峰	吴威佳
2122	L206心胸/整形/血管外科	2025-06-15	2025-06-25	3663980	陈启意	1	62Y	手术后恶性肿瘤化学治疗	右肺恶性肿瘤;慢性胃炎;椎体继发恶性肿瘤;中度贫血;血小板减少;肺气肿;骨折术后;脑梗死后遗症;脊柱侧弯;强直性脊柱炎;下肢动脉粥样硬化;脱髓鞘性脑病;前列腺增生;后天性肾囊肿;胃憩室	好转	章岳峰	章岳峰	吴威佳	静脉注射化疗药物
2123	L206心胸/整形/血管外科	2025-06-22	2025-06-27	3664777	徐欢廷	1	68Y	液气胸	肺气肿合并肺大泡;肺肿物;颈部脊髓损伤;急性不完全性驰缓性四肢瘫;颈椎骨折C5;颈椎骨折C6;颈椎骨折C7;颈部韧带扭伤;颈椎椎管狭窄;硬膜外血肿;颈椎间盘疾患;腔隙性脑梗死	治愈	章岳峰	章岳峰	吴威佳	胸腔闭式引流术
2124	L206心胸/整形/血管外科	2025-05-27	2025-06-28	3665233	黄国兰	2	52Y	左肺下叶恶性肿瘤	慢性肾脏病3期;2型糖尿病性肾病;2型糖尿病性视网膜病变;黄斑水肿;低蛋白血症;维生素D缺乏;重复肾;颈动脉硬化;胸椎压缩性骨折;蛋白尿	治愈	黄宪平	黄宪平	谷利中	胸腔镜下肺叶切除术;胸腔镜纵隔淋巴结清扫术;超声引导下胸腔穿刺术
2125	L206心胸/整形/血管外科	2025-06-19	2025-06-30	3665917	陈磊	1	50Y	主动脉夹层B型	创伤性脾破裂;肝挫伤;肾上腺血肿;腰椎骨折;尺骨冠突骨折;特发性(原发性)高血压;胸腔积液;腹腔积液;肾结石;多发性肝囊肿;胸椎骨折	治愈	邓超频	郑继行	郑继行	主动脉造影术;置入一根血管的支架;胸主动脉覆膜支架腔内隔绝术;腹腔动脉造影;经导管脾动脉栓塞术;四根或更多根血管操作
2126	L206心胸外科	2025-01-28	2025-02-09	3604076	余礼博	1	77Y	肺上叶恶性肿瘤	高血压;肝囊肿;后天性肾囊肿;骨折术后	治愈	黄宪平	黄宪平	谷利中	胸腔镜下肺叶切除术;胸腔镜纵隔淋巴结清扫术
2127	L206心胸外科	2025-02-11	2025-02-15	3606079	梁战友	1	60Y	包裹性脓胸	2型糖尿病;胸腔积液;肺不张;肋骨骨折;主动脉钙化;液气胸	好转	黄宪平	黄宪平	谷利中	颈内静脉穿刺中心静脉置管术
2128	L206心胸外科	2025-02-22	2025-02-28	3610562	朱秀芬	2	58Y	创伤性胸腔积液	肋骨多处骨折;肺挫伤	治愈	章岳峰	章岳峰	朱栋辉
2129	L206心胸外科	2025-02-26	2025-02-28	3610621	余汉杨	1	51Y	药物性皮炎[药疹]	食管恶性肿瘤;肝回声不均;肾结石;前列腺增生;肺肿物;肋骨骨折;食管术后;前列腺结石	好转	黄宪平	黄宪平	谷利中
2130	L206心胸外科	2025-03-15	2025-03-22	3619998	田士坐	1	54Y	创伤性胸腔积液	肺不张;肝囊肿;肋骨多处骨折;膀胱占位性病变	好转	章岳峰	章岳峰	朱栋辉
2131	L206心胸外科	2025-03-22	2025-03-27	3622225	杨国论	1	61Y	肋骨多处骨折	肺肿物;胸骨骨折;创伤性皮下气肿;创伤性胸腔积液;前列腺增生;前列腺钙化灶;前列腺结石	好转	章岳峰	章岳峰	朱栋辉
2132	L206心胸外科	2025-03-26	2025-03-31	3623702	林克荣	1	59Y	四根以上肋骨骨折不伴第一肋骨骨折	特发性(原发性)高血压;2型糖尿病;老年性心脏瓣膜病;肝囊肿;甲状腺结节;腹腔淋巴结肿大	好转	黄宪平	黄宪平	谷利中
2133	L207神经外科/神经内科	2025-01-30	2025-02-09	3604534	胡明生	1	81Y	脑挫伤	创伤性蛛网膜下腔出血;创伤性硬脑膜下出血;额骨骨折;面部软组织挫伤;多发性脑梗死;脱髓鞘性脑病;老年性脑萎缩;高血压;胸腔积液;孤立性肺结节;心包积液;后天性肾囊肿;下肢动脉粥样硬化;胆囊结石	好转		张弩
2134	L207神经外科/神经内科	2024-10-11	2025-02-10	3605054	陈光兴	1	67Y	创伤性硬脑膜下血肿	创伤性急性硬膜下出血;脑挫伤;创伤性蛛网膜下腔出血;顶骨骨折;肋骨多处骨折;胫骨远端骨折伴腓骨骨折;肩胛骨骨折;后天性肾囊肿;肺部感染	好转	王怀瓯	陈彦克	陈彦克	脑内血肿清除术;肩胛骨骨折切开复位钢板内固定术;胫骨骨折切开复位钢板内固定术;腓骨骨折切开复位钢板内固定术;胫骨和腓骨移植术;暂时性气管切开术;颅骨修补术;脑室外引流[EVD]装置置入术;脑室-腹腔分流术
2135	L207神经外科/神经内科	2025-01-29	2025-02-15	3605980	董光兴	1	83Y	创伤性硬脑膜下血肿	脑挫伤;额骨骨折;创伤性蛛网膜下出血;颅骨和面骨多发性骨折;胸腔积液;两根肋骨骨折不伴第一肋骨骨折	好转	张弩	周辉	俞丽生	脑脊液漏修补术;眶骨骨折切开复位内固定术;脑内血肿清除术
2136	L207神经外科/神经内科	2024-12-28	2025-02-20	3607202	谢定道	1	83Y	创伤性硬脑膜下血肿	脑挫伤;创伤性蛛网膜下腔出血;头皮血肿;颅骨多发性骨折;肋骨多处骨折;下肢静脉血栓形成;肺部感染;胸腔积液	好转	张弩	俞丽生		脑内血肿清除术;脑内血肿清除术;暂时性气管切开术
2137	L207神经外科/神经内科	2025-01-21	2025-03-02	3611331	谷逊其	1	73Y	弥散性大脑损伤伴出血	高血压;创伤性硬脑膜下血肿;创伤性蛛网膜下腔出血;颞骨骨折;下肢静脉血栓形成;乙型肝炎肝硬化;肺肿物;胸腔积液;后天性肾囊肿;肾结石;多发性脑梗死;老年性脑萎缩	好转	张弩	陈彦克		脑内血肿清除术
2138	L207神经外科/神经内科	2025-02-22	2025-03-05	3612620	朱丐余	1	74Y	大脑动脉闭塞脑梗死	大脑前动脉闭塞;腔隙性脑梗死;脑内出血;颈动脉硬化;锁骨下动脉粥样硬化;大脑前动脉狭窄;大脑中动脉狭窄;颈内动脉狭窄;鼻窦炎;外周动脉粥样硬化;周围神经病;特发性(原发性)高血压;腰椎间盘突出;肋骨骨折;陈旧性腰椎骨折;颈椎间盘突出;胸椎退行性病变;胸椎压缩性骨折;肺不张	好转	林燕	徐珑珑	沈洁
2139	L207神经外科/神经内科	2024-12-12	2025-03-05	3613012	蔡惠新	1	56Y	创伤性硬脑膜下血肿	创伤性脑疝;创伤性蛛网膜下腔出血;肋骨多处骨折;颈椎退行性病变;特发性(原发性)高血压;2型糖尿病;肺部感染;呼吸衰竭	好转	盛汉松	林逢春	林逢春	脑膜切开伴硬脑膜下腔血肿清除术;暂时性气管切开术
2140	L207神经外科/神经内科	2025-02-15	2025-03-08	3614019	徐佳琳	2	4Y	脑挫伤	创伤性蛛网膜下腔出血;创伤性急性硬膜下出血;颅骨骨折;头皮血肿;肺部感染;寰枢关节扭伤;心肌损害	好转	张弩	周辉	俞丽生	脑内血肿清除术;呼吸机治疗[小于96小时];股静脉穿刺置管术;硬脑膜缝合术;气管内插管
2141	L207神经外科/神经内科	2025-03-04	2025-03-19	3618554	曹淑华	2	64Y	多发性脑梗死	焦虑抑郁状态;高脂血症;临床症状不明显[亚临床]的碘缺乏性甲状腺功能减退症;颈椎退行性病变;颈椎间盘突出;脊柱术后;腰椎骨折L1;腰椎峡部裂;主动脉钙化;退行性主动脉瓣疾患;二尖瓣反流;肺肿物;脂肪肝;肝囊肿;鼻窦炎	好转	林燕	徐珑珑	沈洁
2142	L207神经外科/神经内科	2025-03-31	2025-04-08	3627142	章成元	1	58Y	周围性面神经麻痹	2型糖尿病;特发性(原发性)高血压;颈动脉硬化;下肢动脉粥样硬化;慢性乙型病毒性肝炎;胆囊息肉;副脾;肺肿物;肾结石;后天性肾囊肿;肾肿物;胫骨骨折不连接;人工膝关节	好转	林燕	邵胜敏	邵胜敏
2143	L207神经外科/神经内科	2025-03-09	2025-04-08	3627195	钱香连	2	55Y	基底节出血	特发性(原发性)高血压;2型糖尿病;枕骨骨折;腔隙性脑梗死;脑软化灶;肺钙化;孤立性肺结节;心包积液;退行性主动脉瓣疾患;二尖瓣反流	好转	盛汉松	林逢春	杨亮	脑内血肿清除术;气管内插管;呼吸机治疗[小于96小时]
2144	L207神经外科/神经内科	2025-03-30	2025-04-12	3628988	包云娇	2	66Y	基底动脉闭塞脑梗死	精神分裂症;高脂血症;高同型半胱氨酸血症;下肢动脉粥样硬化;椎间盘突出;胸椎压缩性骨折;骨质疏松;脂肪肝;甲状腺结节;肺肿物	好转	林燕	徐珑珑	沈洁
2145	L207神经外科/神经内科	2025-03-27	2025-04-16	3630790	潘正启	1	72Y	弥散性大脑损伤伴出血	创伤性蛛网膜下腔出血;颧弓骨折;肺部感染;肺肿物;胸腔积液;腹腔积液;面部软组织挫伤	好转	张弩	周辉	卢相琦	脑内血肿清除术;呼吸机治疗[大于等于96小时];气管内插管
2146	L207神经外科/神经内科	2025-03-14	2025-04-27	3635688	欧阳飞	1	79Y	脑挫伤	创伤性硬脑膜下血肿;创伤性蛛网膜下腔出血;枕骨骨折;颅底骨折;创伤性颅内积气;心房颤动;心房扑动;老年性心脏瓣膜病;心功能Ⅱ级;肺部感染;肺气肿;胸腔积液;高血压;桥本甲状腺炎;颈动脉硬化;甲状腺结节;脾大;后天性肾囊肿;2型糖尿病;颈椎退行性病变;颈椎间盘突出;颈椎椎管狭窄	好转	张弩	周辉	卢相琦	脑内血肿清除术;呼吸机治疗[大于等于96小时];气管内插管
2147	L207神经外科/神经内科	2025-03-07	2025-04-29	3636654	胡冬华	2	68Y	创伤性硬脑膜下血肿	脑挫伤;创伤性蛛网膜下腔出血;颞骨骨折;主动脉钙化;胆囊结石;肾结石;颈椎退行性病变;2型糖尿病	好转	王怀瓯	陈彦克		脑内血肿清除术
2148	L207神经外科/神经内科	2025-03-31	2025-04-29	3636954	杨勇芝	2	48Y	脑挫伤	枕骨骨折;颞骨骨折;创伤性蛛网膜下腔出血;面部软组织挫伤;胸腔积液;肋骨多处骨折;肩胛骨骨折;骨盆骨折	好转	周辉	蔡铭	蔡铭	脑内血肿清除术;骨盆骨折闭合性复位术;盆骨外固定术;应用单平面外固定架
2149	L207神经外科/神经内科	2025-04-21	2025-05-05	3639416	季明清	1	70Y	顶枕叶脑出血	肺部感染;腔隙性脑梗死;特发性(原发性)高血压;高脂血症;高同型半胱氨酸血症;下肢动脉粥样硬化;颈内动脉斑块;胆囊结石;后天性肾囊肿;肺肿物;陈旧性肋骨骨折	好转	林燕	徐珑珑	沈洁
2150	L207神经外科/神经内科	2025-05-08	2025-05-13	3643157	方美英	2	76Y	帕金森病	二尖瓣及主动脉瓣关闭不全;颈动脉硬化;下肢动脉粥样硬化;高同型半胱氨酸血症;胸椎压缩性骨折;胸椎退行性病变	好转	林燕	徐珑珑	沈洁
2151	L207神经外科/神经内科	2025-04-30	2025-05-21	3647284	项阿招	2	78Y	大脑动脉闭塞脑梗死	泌尿道感染;大脑中动脉闭塞;特发性(原发性)高血压;2型糖尿病;高脂血症;高同型半胱氨酸血症;颈内动脉斑块;下肢动脉粥样硬化;阿尔茨海默病;头皮血肿;肋骨骨折;肺肿物;肾功能不全	好转	林燕	徐珑珑	沈洁
2152	L207神经外科/神经内科	2025-04-27	2025-06-01	3652765	张友仁	1	57Y	弥散性大脑损伤伴出血	额骨和顶骨骨折;酒精性肝硬化;肺部感染;高血压;血糖过多	好转	张弩	周辉	蔡铭	脑内血肿清除术;脑脊液漏修补术
2153	L207神经外科/神经内科	2025-05-21	2025-06-04	3653909	郑珠英	2	84Y	大脑动脉闭塞脑梗死	心房颤动;卒中后抑郁;心功能不全;高同型半胱氨酸血症;二尖瓣狭窄伴三尖瓣关闭不全;骨折术后;具有心脏起搏器	好转	林燕	邵胜敏	沈洁
2154	L207神经外科/神经内科	2025-03-05	2025-06-20	3661542	蔡惠新	1	56Y	创伤性脑疝	创伤性蛛网膜下腔出血;创伤性硬脑膜下血肿;枕骨骨折;头皮血肿;肋骨多处骨折;颈椎退行性病变	死亡	盛汉松	林逢春	林逢春
2155	L207神经外科/神经内科	2025-05-16	2025-06-24	3663324	潘统乾	1	76Y	脑挫伤	顶骨骨折;创伤性硬脑膜外血肿;创伤性蛛网膜下出血;痛风;心房颤动;二尖瓣及三尖瓣关闭不全;糜烂性胃炎;胃底静脉曲张;具有心脏起搏器;手术后恢复期;全血细胞减少;下肢动脉粥样硬化	好转	张弩	周辉	蔡铭
2156	L207神经外科/神经内科	2025-06-07	2025-06-25	3663569	叶志岳	1	74Y	锁骨骨折	大脑动脉闭塞脑梗死;老年性脑萎缩;颈动脉硬化;二尖瓣及主动脉瓣关闭不全;脂肪肝;前列腺增生;肋骨多处骨折	治愈	林燕	邵胜敏	沈洁	锁骨骨折切开复位钢板内固定术;锁骨植骨术;肩关节修补术
2157	L207神经外科/神经内科	2025-06-17	2025-06-28	3664829	李仕朋	1	54Y	范科尼综合征	骨质疏松;2型糖尿病;慢性乙型病毒性肝炎;肝硬化;前臂尺神经损伤;脊椎退行性病变;颈椎间盘突出;陈旧性胸椎骨折;陈旧性肋骨骨折;胫骨骨折;膝关节退行性病变;股骨骨折	好转	林燕	徐珑珑	沈洁
2158	L208神经外科	2024-11-28	2025-01-03	3587475	伍炎文	1	63Y	创伤性硬膜下出血	脑挫伤;颅底骨折;创伤性蛛网膜下腔出血;眶骨骨折;肋骨骨折;脂肪肝;颈椎退行性病变;肾结石;胸腔积液	治愈	盛汉松	许尚虞	许尚虞	脑膜切开伴硬脑膜下腔血肿清除术
2159	L208神经外科	2024-12-23	2025-01-04	3587829	张薇恬	2	4M	创伤性硬脑膜外血肿	枕骨骨折;肺部感染	好转	张弩	周辉	蔡铭	硬脑膜外血肿清除术
2160	L208神经外科	2024-12-24	2025-01-04	3587831	林天朋	1	66Y	脑脊液耳漏	脑挫伤;创伤性硬脑膜下出血;颞骨骨折;多处挫伤;耳损伤;混合性耳聋;感音神经性听觉丧失;后天性肾囊肿;鼻窦炎;高血压;糖尿病	好转	张弩	周辉	蔡铭
2161	L208神经外科	2024-12-19	2025-01-06	3588693	李敬发	1	52Y	局灶性大脑挫伤伴出血	创伤性硬脑膜下血肿;创伤性蛛网膜下腔出血;颅骨骨折;头皮裂伤;肺部感染;胸腔积液	好转	张弩	周辉	俞丽生	脑内血肿清除术;脑脊液漏修补术;颅骨修补术
2162	L208神经外科	2024-12-30	2025-01-06	3588791	林衍招	1	77Y	脑挫伤	颅腔积气;颅骨和面骨多发性骨折;胫腓骨下端骨折;肺部感染;胸腔积液	好转	张弩	周辉	俞丽生
2163	L208神经外科	2024-12-29	2025-01-09	3589910	向大树	1	53Y	脑挫伤	创伤性蛛网膜下腔出血;创伤性硬脑膜外血肿;额骨骨折;颅底骨折;颅腔积气;肺部感染;肺肿物;脂肪肝;后天性肾囊肿	好转	张弩	周辉	卢相琦
2164	L208神经外科	2024-12-24	2025-01-09	3589930	章修银	1	83Y	创伤性硬膜下出血	创伤性蛛网膜下腔出血;眶骨骨折;鼻骨骨折;上颌窦骨折;肋骨骨折;硬脑膜下积液;多发性脑梗死;肺部感染;胸腔积液;特发性(原发性)高血压;头皮血肿;下肢动脉狭窄;后天性肾囊肿;前列腺增生	好转	张弩	周辉	卢相琦
2165	L208神经外科	2024-12-29	2025-01-11	3590529	陈爱联	2	84Y	创伤性硬脑膜下血肿	脑挫伤;额骨骨折;后天性肾囊肿;肾结石;二尖瓣及主动脉瓣关闭不全	好转	张弩	周辉	俞丽生
2166	L208神经外科	2025-01-03	2025-01-12	3590866	胡清语	2	1Y	枕骨骨折	顶骨骨折;脑挫伤;创伤性蛛网膜下腔出血;头皮血肿;多处挫伤	好转	张弩	周辉	俞丽生	股静脉穿刺置管术
2167	L208神经外科	2024-12-11	2025-01-12	3590913	童明财	1	54Y	创伤性硬脑膜下出血	创伤性脑疝;颞骨骨折;后天性颅骨缺损;创伤性蛛网膜下腔出血;颅腔积气;头皮血肿;下肢动脉粥样硬化;胸骨骨折;肺部感染;胸腔积液;肺气肿;肩胛骨骨折	好转	张弩	周辉	蔡铭	脑膜切开伴硬脑膜下腔血肿清除术
2168	L208神经外科	2024-12-17	2025-01-12	3590944	吕秀海	1	53Y	脑挫伤	创伤性蛛网膜下腔出血;血气胸;肋骨多处骨折;肺挫伤;肺部感染;躯干多发性骨折	好转	王怀瓯	陈彦克	陈彦克
2169	L208神经外科	2024-12-11	2025-01-12	3590957	成传岭	1	51Y	创伤性硬脑膜外血肿	脑挫伤;颅底骨折;颅骨骨折;颅腔积气;眼损伤;腰椎骨折;创伤性湿肺;高血压	好转	王怀瓯	王怀瓯	陈彦克
2170	L208神经外科	2025-01-04	2025-01-13	3591373	朱邦其	1	64Y	脑挫伤	创伤性蛛网膜下腔出血;头皮血肿;开放性外耳道损伤;颞骨骨折;肺肿物;脂肪肝;后天性肾囊肿;前列腺增生;前列腺结石	好转	张弩	周辉	蔡铭
2171	L208神经外科	2024-12-28	2025-01-16	3592865	王兴保	1	52Y	创伤性急性硬膜下出血	脑挫伤;创伤性蛛网膜下腔出血;肋骨多处骨折;胸腔积液;多处挫伤	好转	张弩	周辉	蔡铭	脑内血肿清除术;脑脊液漏修补术
2172	L208神经外科	2024-12-17	2025-01-18	3593423	张建兴	1	55Y	创伤性硬脑膜下出血	脑挫伤;创伤性蛛网膜下腔出血;创伤性硬脑膜外出血;肱骨干骨折;锁骨骨折;肩胛骨骨折;脾损伤;肺部感染;急性失血性贫血;低蛋白血症;肝功能不全;下肢静脉血栓形成;肋骨多处骨折;颞骨骨折;脂肪肝	好转	张弩	周辉	蔡铭	全脾切除术;肱骨骨折切开复位钢板内固定术;锁骨骨折切开复位钢板内固定术;脑膜切开伴硬脑膜下腔血肿清除术;肩胛骨骨折切开复位钢板内固定术;肱骨人工骨植骨术;肩胛骨，锁骨和胸廓［肋骨和胸骨］移植术
2173	L208神经外科	2024-12-29	2025-01-25	3596277	樊刚奇	1	56Y	创伤性脑内血肿	创伤性脑疝;颞骨骨折;颈椎退行性病变;后天性肾囊肿	好转	盛汉松	林逢春	林逢春	脑内血肿清除术
2174	L208神经外科	2024-12-31	2025-01-26	3596971	倪根友	1	60Y	局灶性大脑挫伤伴出血	创伤性硬脑膜外血肿;颞骨骨折;颧弓骨折;蝶骨骨折;颈外动脉假性动脉瘤;鼻出血;肋骨多处骨折;胸腔积液;肺部感染;颈椎退行性病变;腰椎间盘突出;胆囊结石	好转	张弩	卢相琦	蔡铭	脑内血肿清除术;鼻内窥镜下电凝止血术;脑血管造影;经导管颅内动脉瘤栓塞术
2175	L208神经外科	2024-11-20	2025-01-26	3597093	聂开红	1	33Y	弥漫性轴索损伤	意识丧失;创伤性蛛网膜下腔出血;侧脑室出血;头皮血肿;肋骨骨折;陈旧性肩胛骨骨折;陈旧性下颌骨骨折;枕骨骨折;髁突骨折;寰椎骨折;肺部感染;足裂伤	好转	张弩	俞丽生	蔡铭
2176	L208神经外科	2025-01-16	2025-01-28	3597750	陈峻勇	1	52Y	脑挫伤	创伤性硬脑膜下血肿;创伤性蛛网膜下出血;颞骨骨折;混合性耳聋	好转	王怀瓯	王怀瓯	陈彦克
2177	L208神经外科	2024-11-03	2025-02-01	3599882	胡理亨	1	73Y	创伤性硬脑膜下血肿	脑挫伤;创伤性蛛网膜下腔出血;颞骨骨折;蝶骨骨折;头皮血肿;耻骨骨折;多处挫伤;肺部感染;胸腔积液;后天性肾囊肿;前列腺钙化灶;脊椎退行性病变	好转	张弩	周辉		脑膜切开伴硬脑膜下腔血肿清除术;颅骨修补术
2178	L208神经外科	2025-01-18	2025-02-04	3601529	陈建娇	2	48Y	颅骨缺损修补	骨折术后恢复期;头皮挫伤;眶区浅表损伤	其他	盛汉松	林逢春	林逢春	颅骨修补术
2179	L208神经外科	2025-01-26	2025-02-06	3602412	厉凤道	1	62Y	慢性硬膜下血肿	陈旧性肋骨骨折;肺肿物;脂肪肝;肝血管瘤	好转	张弩	周辉	卢相琦	硬脑膜下切开引流术
2180	L208神经外科	2025-02-03	2025-02-07	3603332	王光由	1	39Y	创伤性硬脑膜外血肿	脑挫伤;颞骨骨折;颅腔积气	好转	张弩	周辉	卢相琦
2181	L208神经外科	2025-01-26	2025-02-11	3605359	聂开红	1	33Y	弥漫性轴索损伤	脑外伤后遗症;脑挫伤;意识丧失;肋骨骨折;陈旧性肩胛骨骨折;陈旧性脊柱骨折;肺部感染;血糖过多;寰椎骨折	好转	张弩	周辉	卢相琦
2182	L208神经外科	2025-01-24	2025-02-11	3605666	王国华	1	56Y	多发性大脑挫裂伤	创伤性蛛网膜下腔出血;颞骨骨折;头皮血肿;踝挫伤;特发性(原发性)高血压;糖尿病	好转	盛汉松	许尚虞	许尚虞	脑内血肿清除术
2183	L208神经外科	2025-01-14	2025-02-17	3606335	张以弟	1	82Y	创伤性硬脑膜下血肿	多发性脑梗死;上颌骨骨折;高血压;胸腔积液;下腔静脉血栓形成	好转	周辉	俞丽生	卢相琦	硬脑膜下钻孔引流术
2184	L208神经外科	2025-02-03	2025-02-19	3606661	孙皓宸	1	9Y	脑脊液漏	骨折术后恢复期;继发性外斜视;脑挫伤	好转	张弩	周辉	周辉
2185	L208神经外科	2025-02-15	2025-02-19	3606748	王翊诺	2	4Y	脑挫伤	创伤性硬脑膜下血肿;额骨骨折;眶骨骨折	好转	周辉	俞丽生	卢相琦
2186	L208神经外科	2025-01-26	2025-02-22	3607937	李学云	1	74Y	脑挫伤	创伤性蛛网膜下腔出血;创伤性硬脑膜下出血;特发性(原发性)高血压;多发性脑梗死;颅骨脂肪瘤;肺病;胸腔积液;肝囊肿;后天性肾囊肿;陈旧性肋骨骨折	好转	王怀瓯	王怀瓯	陈彦克
2187	L208神经外科	2024-12-29	2025-02-26	3609990	董利心	2	61Y	创伤性脑疝	创伤性脑血肿;创伤性蛛网膜下腔出血;颞骨骨折;颅底骨折;眶骨骨折;头皮挫伤;眼睑挫伤;肋骨多发性骨折伴第一肋骨骨折;锁骨骨折;创伤性湿肺;胸腔积液;肺部感染;肺肿物;后天性肾囊肿;胫骨远端骨折伴腓骨骨折;肝功能不全;下肢静脉血栓形成	好转	张弩	周辉	俞丽生	脑内血肿清除术;暂时性气管切开术;锁骨骨折切开复位钢板内固定术;锁骨人工骨植骨术
2188	L208神经外科	2024-12-25	2025-03-05	3612709	李培龙	1	31Y	开放性多发性颅骨骨折	颅内感染;脑挫伤;创伤性硬脑膜外血肿;创伤性蛛网膜下腔出血;创伤性脑疝;颈椎骨折;头皮撕脱;肺部感染	好转	张弩	周辉	俞丽生	脑室Ommaya泵置入术;腰椎穿刺术;皮肤和皮下坏死组织切除清创术;脑清创术;皮肤和皮下坏死组织切除清创术;脑室Ommaya泵去除术
2189	L208神经外科	2025-01-28	2025-03-06	3613325	陈体众	1	75Y	创伤性硬脑膜下血肿	多发性大脑挫裂伤;枕骨骨折;肺肿物;肋骨多处骨折;肩胛骨骨折;股骨远端骨折;人工髋关节;腰椎骨折;腰椎退行性病变;椎间盘突出	好转	张弩	周辉	卢相琦	脑膜切开伴硬脑膜下腔血肿清除术;股骨骨折切开复位髓内针内固定术;呼吸机治疗[大于等于96小时];气管内插管
2190	L208神经外科	2025-02-25	2025-03-06	3613342	周春兰	2	86Y	脑挫伤	创伤性硬膜下出血;创伤性蛛网膜下出血;高血压;肋骨多处骨折;陈旧性肋骨骨折	好转	盛汉松	林逢春	杨亮
2191	L208神经外科	2025-02-25	2025-03-08	3613868	金进仁	1	61Y	脑挫伤	创伤性硬脑膜外血肿;创伤性硬膜下出血;颅骨骨折;锁骨骨折;肋骨骨折;胸椎骨折;颈椎骨折C5;陈旧性肺结核	好转	张弩	俞丽生	卢相琦
2192	L208神经外科	2025-02-16	2025-03-08	3614166	肖庆法	1	47Y	创伤性硬脑膜外血肿	创伤性硬脑膜下血肿;脑挫伤;顶骨骨折;颧弓骨折;眶骨骨折	好转	张弩	周辉	俞丽生	硬脑膜外血肿清除术;呼吸机治疗[大于等于96小时];气管内插管
2193	L208神经外科	2025-03-06	2025-03-10	3614907	陈体众	1	75Y	创伤性硬脑膜下血肿	多发性大脑挫裂伤;枕骨骨折;肺肿物;肋骨多处骨折;肩胛骨骨折;股骨远端骨折;人工髋关节;腰椎骨折;腰椎退行性病变;腰椎间盘突出	好转	周辉	俞丽生	卢相琦
2194	L208神经外科	2025-02-25	2025-03-12	3615718	王镇贵	1	80Y	脑挫伤	创伤性蛛网膜下腔出血;颞骨骨折;高血压;陈旧性肺结核;肺占位性病变;支气管扩张(症);二尖瓣及主动脉瓣关闭不全;前列腺结石;前列腺增生	好转	盛汉松	林逢春	林逢春
2195	L208神经外科	2025-02-22	2025-03-14	3616521	王邦华	1	47Y	创伤性硬脑膜外血肿	颅骨骨折;眶骨骨折;颧弓骨折;肋骨多处骨折;胸椎骨折;头皮血肿;肺部感染;胸腔积液	好转	周辉	俞丽生	卢相琦	硬脑膜外血肿清除术;颅骨修补术;硬脑膜外血肿清除术;颅骨修补术
2196	L208神经外科	2025-02-12	2025-03-14	3616522	唐仁斌	1	48Y	创伤性硬脑膜外血肿	创伤性硬脑膜下血肿;脑挫伤;颞骨骨折;颧弓骨折;头皮血肿;胸腔积液;肺部感染;肾结石;单侧腹股沟疝	好转	张弩	周辉	俞丽生	硬脑膜外血肿清除术;呼吸机治疗[小于96小时];气管内插管
2197	L208神经外科	2025-03-09	2025-03-15	3617148	张建兴	1	54Y	颅骨缺损修补	硬膜下血肿;脾损伤;骨折术后;肝囊肿	其他	周辉	俞丽生	卢相琦	颅骨修补术
2198	L208神经外科	2025-02-28	2025-03-17	3617744	陈冠涵	2	8Y	创伤性硬脑膜外血肿	顶骨骨折;枕骨骨折;头皮血肿	好转	盛汉松	林逢春	杨亮	硬脑膜外血肿清除术
2199	L208神经外科	2025-02-20	2025-03-19	3618578	黄爱英	2	50Y	脑挫伤	创伤性蛛网膜下腔出血;枕骨骨折;头皮血肿;肺肿物	好转	张弩	俞丽生	蔡铭
2200	L208神经外科	2025-03-07	2025-03-19	3618610	张承店	1	50Y	局灶性大脑挫伤伴出血	脑挫伤;创伤性蛛网膜下腔出血;额骨骨折;颞骨骨折;颧骨骨折;眶骨骨折;尺骨远端骨折伴桡骨远端骨折;肺部感染;脂肪肝;前列腺结石;孤立性肺结节	好转	张弩	俞丽生	蔡铭
2201	L208神经外科	2025-03-11	2025-03-22	3619997	龚德盆	1	44Y	颅骨缺损修补	骨折术后;肋骨多处骨折;锁骨骨折;肺肿物;脂肪肝;肝囊肿	其他	张弩	俞丽生	卢相琦	颅骨修补术
2202	L208神经外科	2025-03-12	2025-03-24	3620621	孙克忠	1	55Y	脑挫伤	枕骨骨折;上颌窦囊肿	好转	王怀瓯	王怀瓯	陈彦克
2203	L208神经外科	2025-03-08	2025-03-25	3621228	伍炎文	1	63Y	颅骨缺损修补	手术后恢复期;颅骨多发性骨折;老年性心脏病;肺肿物;炎症后肺纤维化;陈旧性肋骨骨折;脂肪肝;肾结石	其他	盛汉松	林逢春	林逢春	颅骨修补术
2204	L208神经外科	2025-03-15	2025-03-26	3621914	曹志美	2	3Y	弥漫性轴索损伤	创伤性蛛网膜下腔出血;创伤性硬膜下出血;枕骨骨折;头皮血肿;颅腔积气	好转	张弩	俞丽生	卢相琦
2205	L208神经外科	2025-03-21	2025-03-27	3622434	张明旺	1	3Y	创伤性蛛网膜下腔出血	头皮血肿;胫骨下端骨折	好转	张弩	俞丽生	卢相琦
2206	L208神经外科	2025-03-05	2025-03-30	3623369	段加煌	1	54Y	创伤性蛛网膜下腔出血	侧脑室出血;头皮血肿;多处挫伤;鼻骨骨折;指间关节脱位;肺肿物;肺气肿;前列腺钙化灶	好转	盛汉松	林逢春	林逢春
2207	L208神经外科	2025-03-21	2025-04-01	3624266	刘登贵	1	32Y	创伤性硬脑膜外血肿	额骨骨折;眶骨骨折;面部软组织挫伤	好转	张弩	周辉	卢相琦
2208	L208神经外科	2025-02-27	2025-04-01	3624439	李洪海	1	71Y	创伤性脑出血	创伤性蛛网膜下腔出血;头皮血肿;腰椎骨折;肺大疱;后天性肾囊肿;前列腺钙化灶;主动脉钙化;冠状动脉粥样硬化	好转	盛汉松	林逢春	杨亮	脑内血肿清除术;气管内插管;呼吸机治疗[大于等于96小时]
2209	L208神经外科	2025-03-26	2025-04-04	3625845	张权	1	33Y	脑挫伤	创伤性硬脑膜外血肿;颅骨多发性骨折;创伤性蛛网膜下腔出血;面部挫伤	好转	张弩	周辉	卢相琦
2210	L208神经外科	2025-03-11	2025-04-05	3625967	周美娟	2	85Y	创伤性蛛网膜下腔出血	颅骨骨折;肋骨骨折;胸腔积液;低钠血症;低氯血症;胆囊结石;后天性肾囊肿;下肢静脉血栓形成	好转	张弩	周辉	卢相琦
2211	L208神经外科	2025-03-24	2025-04-05	3625970	任开炳	1	48Y	创伤性蛛网膜下出血	肋骨骨折;创伤性气胸;糖尿病;垂体生长激素瘤	好转	张弩	周辉	卢相琦
2212	L208神经外科	2025-03-25	2025-04-06	3626338	倪根友	1	60Y	颅骨缺损修补	肺部感染;脑外伤后综合征;肺肿物;下肢静脉血栓形成;前列腺结石;肋骨骨折	其他	张弩	周辉	蔡铭	颅骨修补术
2213	L208神经外科	2025-03-09	2025-04-06	3626356	张朝领	1	51Y	脑挫伤	创伤性硬脑膜下血肿;创伤性蛛网膜下腔出血;创伤性硬脑膜外血肿;颞骨骨折;头皮血肿;肱骨大结节骨折;眶骨骨折;肺部感染;胸腔积液;肩袖损伤;创伤性冈上肌断裂	好转	张弩	周辉	卢相琦	脑内血肿清除术;脑脊液漏修补术;呼吸机治疗[小于96小时];气管内插管
2214	L208神经外科	2025-02-17	2025-04-07	3626639	胡颂德	1	60Y	前交通动脉瘤破裂伴蛛网膜下隙出血	肺部感染;眶骨骨折;脑室出血;高血压;脂肪肝	好转	张弩	周辉	卢相琦	脑室切开引流术;脑血管造影;前交通动脉瘤夹闭术;颅骨修补术
2215	L208神经外科	2025-03-19	2025-04-08	3627323	樊刚奇	1	57Y	颅骨缺损修补	颞骨骨折;肺肿物;肺气肿;主动脉钙化	其他	盛汉松	林逢春	林逢春	颅骨修补术
2216	L208神经外科	2025-04-01	2025-04-09	3627938	钱宥丞	1	6M	硬膜外血肿	顶骨骨折;头皮血肿;贫血	好转	张弩	俞丽生	卢相琦
2217	L208神经外科	2025-03-30	2025-04-10	3628218	陈学义	1	66Y	创伤性硬脑膜下血肿	肺部感染;肋骨多处骨折;肺肿物;肺气肿合并肺大泡	好转	张弩	俞丽生	卢相琦	硬脑膜下钻孔引流术
2218	L208神经外科	2025-03-28	2025-04-12	3628894	叶夕毓	2	7Y	创伤性硬脑膜外血肿	创伤性硬脑膜下血肿;颅腔积气;颅骨骨折;锁骨骨折;肋骨骨折;多发性面骨骨折	好转	张弩	俞丽生	卢相琦	硬脑膜外血肿清除术;呼吸机治疗[小于96小时];颅骨修补术;气管内插管
2219	L208神经外科	2025-03-08	2025-04-13	3629139	孙皓宸	1	9Y	脑脊液漏	脑挫伤;骨折术后恢复期;肺部感染;外斜视	好转	张弩	卢相琦	卢相琦	腰大池引流术
2220	L208神经外科	2025-03-15	2025-04-13	3629445	郑元聪	1	56Y	创伤性脑疝	创伤性急性硬膜下出血;创伤性蛛网膜下腔血肿;脑室出血;枕骨骨折;肺部感染;胸腔积液	好转	张弩	周辉	卢相琦	脑内血肿清除术;呼吸机治疗[小于96小时];气管内插管
2221	L208神经外科	2025-04-08	2025-04-14	3629767	陈鑫豪	1	5Y	创伤性硬脑膜下血肿	创伤性硬脑膜外血肿;创伤性颅内积气;颞骨骨折;皮下血肿	好转	张弩	周辉	卢相琦
2222	L208神经外科	2025-03-28	2025-04-15	3630361	钟恩语	2	5Y	脑挫伤	创伤性硬脑膜下血肿;枕骨骨折;颞骨骨折;创伤性蛛网膜下腔出血;颅腔积气;多处挫伤;创伤性硬脑膜外血肿	好转	张弩	周辉	卢相琦
2223	L208神经外科	2025-04-08	2025-04-15	3630498	王银弟	2	85Y	创伤性硬脑膜下血肿	创伤性蛛网膜下腔出血;小脑蚓部出血;头皮血肿;肋骨多处骨折;肺部感染;肺肿物;盆腔积液	好转	张弩	周辉	卢相琦
2224	L208神经外科	2025-03-18	2025-04-16	3630940	李加庄	1	53Y	脑挫伤	创伤性硬脑膜下血肿;头皮血肿;锁骨骨折;后天性肾囊肿;肺肿物;肺部感染;胸腔积液;创伤性蛛网膜下腔出血;颞骨骨折;鼻窦炎	好转	张弩	蔡铭	卢相琦	脑内血肿清除术;呼吸机治疗[小于96小时];气管内插管
2225	L208神经外科	2025-02-20	2025-04-19	3632086	谢定道	1	81Y	脑挫伤	后天性颅骨缺损;颅骨骨折;肋骨骨折;多处挫伤;肺部感染;脑外伤后遗症;胸腔积液	好转	张弩	周辉	卢相琦
2226	L208神经外科	2025-03-08	2025-04-19	3632311	金进仁	1	61Y	颈部脊髓损伤	颈椎骨折C5;颈椎间盘突出;胸椎压缩性骨折;2型糖尿病;额骨和顶骨骨折;脑挫伤;创伤性硬脑膜下血肿;创伤性硬脑膜外血肿;创伤性湿肺;胸腔积液;肋骨多处骨折;肺部感染	好转	张弩	周辉	卢相琦	颈椎间盘切除伴椎管减压术;锁骨骨折切开复位钢板内固定术;气管内插管;呼吸机治疗[小于96小时];颈椎骨折切开复位内固定术;颈椎植骨术;前入路颈椎融合术;2-3个椎骨融合或再融合
2227	L208神经外科	2025-02-27	2025-04-20	3632510	黄素英	2	49Y	弥漫性轴索损伤	脑干损伤;动眼神经损伤;颧骨骨折;肋骨多处骨折;眼眶挫伤;肺挫伤	好转	王怀瓯	王怀瓯	陈彦克
2228	L208神经外科	2025-04-01	2025-04-20	3632595	陈体众	1	75Y	颅骨缺损修补	硬膜下血肿;多发性大脑挫裂伤;枕骨骨折;陈旧性肋骨骨折;空洞型肺结核，痰镜检(-);硬脑膜下积液;骨折术后;人工髋关节;腰椎压缩性骨折	其他	张弩	周辉	卢相琦	颅骨修补术
2229	L208神经外科	2025-03-23	2025-04-22	3633481	朱欣宜	2	3Y	创伤性脑疝	创伤性硬膜下出血;创伤性蛛网膜下出血;颅骨骨折;肺挫伤;气胸;腹腔积血;髂骨骨折;骶骨骨折;肱骨骨折;肺炎	好转	张弩	俞丽生	卢相琦	呼吸机治疗[小于96小时];经外周静脉穿刺中心静脉置管术;气管内插管
2230	L208神经外科	2025-03-05	2025-04-22	3633591	李培龙	1	31Y	创伤性脑积水	颅内感染;开放性颅骨骨折;脑挫伤;创伤性硬脑膜外血肿;蛛网膜下腔出血后遗症;颈椎骨折;颈部脊髓损伤;肺部感染;头皮撕脱	好转	张弩	周辉	卢相琦	侧脑室腹腔内分流术
2231	L208神经外科	2025-03-16	2025-04-27	3635881	吴步进	1	58Y	创伤性硬脑膜下血肿	创伤性硬脑膜外血肿;创伤性蛛网膜下腔血肿;脑挫伤;枕骨骨折;头皮血肿;肋骨多处骨折;创伤性湿肺;眶骨骨折;乙型病毒性肝炎;膀胱结石;肾结石;膀胱结石;股骨头缺血性坏死;颈椎退行性病变;颈椎间盘突出;肺部感染;孤立性肺结节	好转	张弩	周辉	卢相琦
2232	L208神经外科	2025-04-08	2025-04-28	3636359	沈淑洁	2	56Y	创伤性硬脑膜下血肿	脑挫伤;创伤性蛛网膜下腔出血;颅底骨折;颧弓骨折;肾错构瘤;胸腔积液;肺部感染;肋骨骨折;肺肿物;鼻窦炎	好转	盛汉松	林逢春	林逢春
2233	L208神经外科	2025-04-12	2025-04-28	3636430	项秀靖	2	47Y	脑挫伤	创伤性硬脑膜下血肿;创伤性蛛网膜下腔出血;头皮血肿;脂肪肝;肱骨大结节骨折;蛛网膜囊肿;肺肿物	好转	张弩	俞丽生	卢相琦
2234	L208神经外科	2025-04-24	2025-05-03	3638668	邵和气	1	30Y	脑挫伤	颞骨骨折;头皮血肿	好转	张弩	周辉	俞丽生
2235	L208神经外科	2025-01-28	2025-05-05	3639687	蔡耀梅	1	72Y	脑挫伤	创伤性硬脑膜下血肿;创伤性蛛网膜下腔出血;枕骨骨折;肺部感染;脑积水，其他的;高血压;心房颤动;2型糖尿病;主动脉钙化	好转	王怀瓯	王怀瓯	陈彦克	脑内血肿清除术;脑内血肿清除术;呼吸机治疗[大于等于96小时];暂时性气管切开术
2236	L208神经外科	2025-03-14	2025-05-06	3640004	彭静梅	2	73Y	创伤性硬脑膜下血肿	创伤性蛛网膜下出血;脑挫伤;颅底骨折;肺部感染	好转	盛汉松	林逢春	杨亮	脑内血肿清除术;脑膜切开伴硬脑膜下腔血肿清除术
2237	L208神经外科	2025-04-17	2025-05-06	3640097	樊思麟	1	10Y	创伤性硬脑膜外血肿	颞骨骨折;脑挫伤;创伤性蛛网膜下腔出血;头皮血肿;多处挫伤;枕骨骨折	好转	张弩	周辉	蔡铭
2238	L208神经外科	2025-04-19	2025-05-10	3641603	谢定道	1	81Y	脑挫伤	后天性颅骨缺损;创伤后硬脑膜下积液;颅骨骨折;陈旧性肋骨骨折;肺部感染;胸腔积液;多处挫伤;应激性高血糖状态;脂肪肝;肝囊肿;后天性肾囊肿	好转	张弩	周辉	卢相琦
2239	L208神经外科	2025-04-22	2025-05-12	3642635	朱欣宜	2	3Y	脑积水	后天性颅骨缺损;肺挫伤;髂骨骨折;骶骨骨折;肱骨骨折;锁骨骨折;意识丧失;运动障碍;中枢性面神经麻痹	好转	张弩	周辉	俞丽生	侧脑室腹腔内分流术
2240	L208神经外科	2025-05-02	2025-05-13	3643212	郑元聪	1	56Y	颅骨缺损修补	脑挫伤;枕骨骨折;前列腺结石;声带麻痹	其他	张弩	周辉	蔡铭	颅骨修补术;脑脊液漏修补术
2241	L208神经外科	2025-05-10	2025-05-15	3644406	瓯秀香	2	85Y	脑挫伤	枕骨骨折;头皮挫伤;多发性脑梗死;陈旧性肺结核;特发性(原发性)高血压;肺动脉高压	好转	张弩	周辉	俞丽生
2242	L208神经外科	2025-05-03	2025-05-17	3645420	林天弟	2	63Y	创伤性蛛网膜下腔出血	头皮裂伤;肩胛骨骨折;脂肪肝;椎间盘突出	好转	张弩	周辉	俞丽生
2243	L208神经外科	2025-05-10	2025-05-18	3645720	王连文	1	51Y	脑挫伤	创伤性蛛网膜下腔出血;鼻窦炎;肺肿物;肺气肿;锁骨骨折;脂肪肝	好转	张弩	周辉	蔡铭
2244	L208神经外科	2025-05-11	2025-05-18	3645725	梁辉文	1	59Y	脑挫伤	创伤性闭合性硬膜外血肿;创伤性蛛网膜下出血;顶骨骨折;头皮血肿;慢性肾炎;主动脉瓣关闭不全	好转	张弩	周辉	蔡铭
2245	L208神经外科	2025-04-12	2025-05-19	3646174	吴兴园	1	25Y	创伤性硬脑膜外血肿	颞骨骨折;顶骨骨折;颅底骨折;肺部感染;胸腔积液;双侧混合性传导性和感音神经性听觉丧失	好转	盛汉松	林逢春	林逢春	硬脑膜外血肿清除术
2246	L208神经外科	2025-05-06	2025-05-19	3646184	肖庆法	1	47Y	颅骨缺损修补	顶骨骨折;颧弓骨折;肺大疱;肺肿物;肾结石	其他	张弩	周辉	卢相琦	颅骨修补术
2247	L208神经外科	2025-05-04	2025-05-21	3647718	廖远业	1	78Y	顶骨骨折	症状性癫痫[继发性癫痫];脑挫伤;硬脑膜下积液;头皮血肿;第二颈椎骨折;颈部脊髓损伤;颈椎骨折;胸椎骨折;眶骨骨折;胸腔积液	好转	张弩	周辉	卢相琦	颅骨骨折复位术
2248	L208神经外科	2025-04-25	2025-05-23	3648342	郑超元	1	18Y	创伤性硬脑膜外血肿	创伤性脑疝;颞骨骨折;颅底骨折;后天性颅骨缺损;展神经损伤;胸骨骨折;颈淋巴结肿大	好转	张弩	周辉	俞丽生	硬脑膜外血肿清除术;外耳裂伤缝合术
2249	L208神经外科	2025-04-25	2025-05-24	3648598	项连珠	2	80Y	脑挫伤	创伤性硬脑膜下血肿;枕骨骨折;创伤性蛛网膜下腔出血;头皮挫伤;肺部感染;颈椎间盘突出;高血压;下肢静脉血栓形成;肩袖损伤	好转	张弩	张弩	张弩
2250	L208神经外科	2025-05-14	2025-05-24	3648953	董芝蕊	2	84Y	脑挫伤	创伤性硬脑膜下血肿;创伤性蛛网膜下腔出血;枕骨骨折;颞骨骨折;后天性肾囊肿;肋骨多处骨折;胸腔积液;肺部感染;肺肿物;甲状腺肿	好转	盛汉松	林逢春	林逢春
2251	L208神经外科	2025-05-13	2025-05-26	3649631	张崇传	1	75Y	创伤性硬脑膜下血肿	2型糖尿病;脑梗死后遗症;特发性(原发性)高血压;阿尔茨海默病;大便失禁;尿失禁;肺大疱;陈旧性肋骨骨折	好转	张弩	俞丽生	卢相琦	脑膜切开伴硬脑膜下腔血肿清除术
2252	L208神经外科	2024-12-31	2025-05-31	3652393	李培宽	1	60Y	创伤性脑疝	创伤性硬膜下出血;创伤性蛛网膜下腔血肿;肋骨多处骨折;肩胛骨骨折;液气胸;肺部感染;胸腔积液;二尖瓣及主动脉瓣关闭不全;心包积液;脂肪肝;脊椎退行性病变;椎间盘膨隆	好转	尹波	俞丽生	方均浩	脑内血肿清除术;脑脊液漏修补术
2253	L208神经外科	2025-04-23	2025-06-02	3652953	何炎焱	1	54Y	脑挫伤	创伤性硬膜下出血;创伤性蛛网膜下出血;颞骨骨折;顶骨骨折;枕骨骨折;肺气肿;眼球痨;肺肿物	好转	张弩	周辉	蔡铭
2254	L208神经外科	2025-05-25	2025-06-03	3653421	余建祥	1	2Y	枕骨骨折	创伤性蛛网膜下腔出血;多处挫伤	好转	盛汉松	林逢春	杨亮	颅骨骨折复位术;呼吸机治疗[小于96小时];气管内插管
2255	L208神经外科	2025-04-29	2025-06-03	3653555	王丽光	1	55Y	创伤性硬脑膜外血肿	创伤性硬脑膜下出血;脑挫伤;创伤性蛛网膜下腔出血;颧弓骨折;肋骨多处骨折;胸椎横突骨折;掌骨骨折;胸腔积液;食管裂孔疝;胃食管反流;肾结石;肝钙化灶;胆囊息肉;前列腺增生	好转	盛汉松	林逢春	杨亮
2256	L208神经外科	2025-05-23	2025-06-05	3654560	李启水	1	84Y	创伤性蛛网膜下腔出血	眶骨骨折;特发性(原发性)高血压;胸腔积液;主动脉钙化;后天性肾囊肿;下肢静脉血栓形成	好转	张弩	周辉	俞丽生
2257	L208神经外科	2025-05-23	2025-06-07	3655240	张朝领	1	51Y	颅骨缺损修补	手术后恢复期;眶骨骨折;肺部感染;胸腔积液;肩锁关节脱位	其他	张弩	周辉	蔡铭	颅骨修补术
2258	L208神经外科	2025-05-01	2025-06-07	3655326	孙玉亮	1	67Y	脑挫伤	创伤性硬脑膜下血肿;颞骨骨折;肺肿物;脂肪肝;膀胱钙化;前列腺钙化灶;主动脉钙化;冠状动脉粥样硬化;主动脉(瓣)关闭不全	好转	盛汉松	林逢春	林逢春
2259	L208神经外科	2025-06-03	2025-06-07	3655614	金福林	1	63Y	脑挫伤	脑积水;肋骨骨折;脑出血后遗症;高血压;肾结石;老年性脑萎缩;颈动脉硬化;下肢动脉粥样硬化;肺大疱	好转	王怀瓯	王怀瓯	陈彦克
2260	L208神经外科	2025-05-29	2025-06-10	3656930	王国太	1	53Y	脑挫伤	创伤性蛛网膜下腔血肿;颧骨骨折;颞骨骨折;上颌窦骨折;眶骨骨折;面部软组织挫伤;肋骨多处骨折;肺挫伤;胸腔积液;肾结石	好转	张弩	张弩	张弩
2261	L208神经外科	2025-05-30	2025-06-15	3659038	李加庄	1	53Y	颅骨缺损修补	顶骨骨折;颧弓骨折;孤立性肺结节;特发性(原发性)高血压	其他	张弩	周辉	蔡铭	颅骨钛网置入术
2262	L208神经外科	2025-06-04	2025-06-15	3659305	周欣然	2	5Y	脑挫伤	创伤性硬脑膜下血肿;创伤性硬脑膜外血肿;颞骨骨折;头皮血肿;上颌窦炎	好转	盛汉松	林逢春	杨亮
2263	L208神经外科	2025-04-23	2025-06-16	3659498	郑华	2	48Y	创伤性脑疝	头皮血肿;创伤性硬脑膜下血肿;创伤性蛛网膜下腔血肿;枕骨骨折	好转	王怀瓯	王怀瓯	陈彦克	脑膜切开伴硬脑膜下腔血肿清除术;颅骨修补术
2264	L208神经外科	2025-06-01	2025-06-17	3659981	张奕豹	1	43Y	脑挫伤	创伤性硬脑膜下出血;创伤性蛛网膜下腔出血;颞骨骨折;四根以上肋骨骨折不伴第一肋骨骨折;后天性肾囊肿;肾结石;高脂血症;中耳和乳突疾患;乳突炎	好转	张弩	周辉	蔡铭
2265	L208神经外科	2025-06-23	2025-06-25	3663882	周桂花	2	91Y	脑挫伤	创伤性硬膜下出血;侧脑室出血;创伤性蛛网膜下腔出血;枕骨骨折;头皮血肿;慢性失血性贫血	好转	张弩	周辉	卢相琦
2266	L208神经外科	2025-06-19	2025-06-25	3663914	赵忠银	2	42Y	脑挫伤	颅腔积气;颅骨骨折;头皮血肿;肺挫伤;胸骨骨折;锁骨骨折;骨盆骨折;胸椎骨折;皮肤裂伤;多处挫伤	好转	张弩	周辉	卢相琦
2267	L208神经外科	2025-06-12	2025-06-28	3664872	滕跃勤	1	55Y	创伤性脑出血	创伤性硬脑膜下血肿;颅腔积气;创伤性蛛网膜下腔出血;额骨和顶骨骨折;肾结石;前列腺结石	好转	张弩	周辉	俞丽生	脑内血肿清除术;颅骨骨折复位术
2268	L208神经外科	2025-06-14	2025-06-28	3664881	甘世勤	1	60Y	脑挫伤	创伤性蛛网膜下出血;额骨骨折;蝶骨骨折;肋骨骨折;肺气肿;肝挫伤;腹腔积液;膝关节积液;腓骨良性肿瘤	好转	张弩	周辉	俞丽生
2269	L208神经外科	2025-06-23	2025-06-28	3664900	向晓明	1	34Y	创伤性蛛网膜下腔出血	皮下血肿;鼻骨骨折;上颌骨骨折;肝钙化灶	好转	盛汉松	林逢春	林逢春
2270	L208神经外科	2025-06-15	2025-06-29	3665433	陈学义	1	66Y	慢性硬膜下血肿	陈旧性肋骨骨折;胸腔积液;肺肿物	好转	张弩	周辉	俞丽生	硬脑膜下钻孔引流术
2271	L208神经外科	2025-06-05	2025-06-29	3665456	陈佐芬	2	53Y	创伤性脾破裂	局灶性大脑挫裂伤;创伤性蛛网膜下腔出血;肾挫伤;腰椎骨折;多发性骨盆骨折;颈椎退行性病变;颈椎间盘突出	好转	张弩	周辉	蔡铭	经导管髂内动脉栓塞术;髂动脉造影;经导管脾动脉栓塞术
2272	L208神经外科	2025-03-30	2025-06-30	3666112	陈静	1	47Y	多发性大脑挫裂伤	创伤性蛛网膜下出血;肺挫伤;肋骨多处骨折;锁骨骨折;创伤性血气胸;肾挫伤;腓骨骨折;下肢静脉肌间血栓形成;肺部感染;胸腔积液;气管造口状态	好转	张弩	周辉	蔡铭	胸腔闭式引流术;胸腔闭式引流术
2273	L210胃肠肿瘤科	2025-04-01	2025-04-21	3632959	张联余	1	71Y	贲门恶性肿瘤	胃出血;腹腔粘连;慢性胃炎;肺部感染;主动脉钙化;糖尿病;高脂血症;颈动脉硬化;腰椎压缩性骨折	好转	黄颖鹏	胡经纬	张良	腹腔镜辅助全胃切除伴食管-空肠吻合术;腹腔镜腹腔淋巴结清扫术;腹腔镜下腹腔粘连松解术;上消化道造影
2274	L210胃肠肿瘤科	2025-04-19	2025-04-22	3633648	叶国众	1	78Y	单侧腹股沟直疝	糖尿病;焦虑［回避］型人格障碍;老年性心脏瓣膜病;肺肿物;下肢动脉粥样硬化;肾结石伴有输尿管结石;后天性肾囊肿;前列腺结石;陈旧性肋骨骨折;前列腺术后;胃术后	治愈	李利义	俞耀军	陈健	腹腔镜下经腹膜前腹股沟疝补片修补术（TAPP）
2275	L210胃肠肿瘤科	2025-04-05	2025-05-11	3642223	林瑞弟	1	74Y	胃恶性肿瘤	胃溃疡伴出血;高血压;痛风;下肢静脉曲张;肺肿物;后天性肾囊肿;肾结石;前列腺结石;老年性脑萎缩;腹腔粘连;腔隙性脑梗死;骨折术后	好转	黄颖鹏	胡经纬	张良	腹腔镜胃大部切除伴胃空肠吻合术;腹腔镜腹腔淋巴结清扫术;腹腔镜下腹腔粘连松解术
2276	L210胃肠肿瘤科	2025-05-11	2025-05-13	3643325	李其该	1	63Y	手术后恶性肿瘤化学治疗	胃恶性肿瘤;高血压;骨折术后	好转	俞耀军	李利义	陈健	静脉注射化疗药物
2277	L210胃肠肿瘤科	2025-05-16	2025-05-21	3647818	章人六	1	72Y	弥散性血管内凝血	胃恶性肿瘤;肺部感染;慢性顽固性疼痛;脂肪肝;前列腺增生;前列腺结石;轻度营养不良;后天性肾囊肿;胸椎骨折T11/T12;腰椎退行性病变;肺的其他疾患;孤立性肺结节;胸腔积液	好转	姚荣欣	姚荣欣	黄河2
2278	L210胃肠肿瘤科	2025-06-01	2025-06-03	3653455	李其该	1	63Y	手术后恶性肿瘤化学治疗	胃恶性肿瘤;高血压;骨折术后	好转	俞耀军	李利义	陈健	静脉注射化疗药物
2279	L210胃肠肿瘤科	2025-06-14	2025-06-20	3661446	徐克畴	1	91Y	不完全性肠梗阻	便秘;心力衰竭;代谢性酸中毒;痛风;慢性肾功能不全;高血压;老年性心脏病;肺动脉高压;肺气肿;肺肿物;慢性阻塞性肺病伴有急性下呼吸道感染;肾结石;前列腺钙化灶;肠系膜炎;胆囊切除术后状态;腹股沟术后;骨折术后	好转	郑志强	徐晓武	易永东
2280	L210胃肠肿瘤外科	2024-12-29	2025-01-16	3592741	张兆兰	1	93Y	直肠恶性肿瘤	胸椎压缩性骨折;腰椎退行性病变;消化道出血;冠状动脉粥样硬化性心脏病;多发性脑梗死;泌尿道感染;肺肿物;胸腔积液;肺气肿;肝囊肿;胆囊结石;后天性肾囊肿;肾结石;膀胱结石;膀胱憩室;前列腺增生;甲状腺结节;下肢动脉粥样硬化	好转	俞耀军	李利义	陈健	腹腔镜下经腹直肠乙状结肠切除术;腹腔镜下肠粘连松解术;区域性淋巴结切除术;腹腔镜下输尿管周围粘连松解术;降结肠-乙状结肠吻合术
2281	L210胃肠肿瘤外科	2024-12-26	2025-01-24	3596159	潘美莲	2	87Y	肠梗阻	脑梗死;结肠憩室炎;肠道感染;腹腔积液;肺部感染;高血压;心房颤动;低蛋白血症;人工膝关节;骨折术后	好转	郑志强	徐晓武	易永东	腹腔穿刺引流术;腹腔穿刺引流术
2282	L210胃肠肿瘤外科	2025-02-09	2025-03-15	3616924	潘统泽	1	70Y	创伤性十二指肠破裂	十二指肠残端瘘;胆汁性腹膜炎;操作后伤口感染;桡骨远端骨折;正中神经的其他损害;2型糖尿病;脂肪肝;后天性肾囊肿;前列腺增生;膀胱结石;冠状动脉支架植入后状态	治愈	俞耀军	俞耀军	陈健	桡骨骨折切开复位钢板内固定术;十二指肠裂伤缝合术;腹腔镜检查;胃空肠吻合术（旁路）;鼻空肠营养管置入术;正中神经探查术;腹腔冲洗检查;气管内插管;呼吸机治疗[大于等于96小时]
2283	L210胃肠肿瘤外科	2025-02-17	2025-03-15	3616996	郑桂兰	2	82Y	胸主动脉假性动脉瘤	贲门胃底恶性肿瘤;静脉血栓形成;贫血;低蛋白血症;败血症;胸腔积液;主动脉钙化;颈动脉硬化;后天性肾囊肿;肋骨骨折	治愈	黄颖鹏	胡经纬	张良	胸主动脉覆膜支架腔内隔绝术;胸主动脉造影;超声引导下胸腔穿刺术;超声引导下胸腔穿刺术
2284	L210胃肠肿瘤外科	2025-03-10	2025-03-25	3621390	卓培枢	1	64Y	结肠恶性肿瘤	消化道出血;贫血;扩张性心肌病[充血性心肌病];胃溃疡;慢性胃炎;2型糖尿病;陈旧性肋骨骨折;下肢动脉粥样硬化;肠粘连	治愈	李利义	俞耀军	陈健	腹腔镜右半结肠切除术;肠系膜淋巴结清扫术;回肠-横结肠吻合术;腹腔镜下肠粘连松解术
2285	L211肝胆胰外科	2024-12-28	2025-01-05	3588089	章握坑	1	76Y	恶性肿瘤维持性化学治疗	胰腺术后;特发性(原发性)高血压;肺诊断性影像异常;肋骨骨折;后天性肾囊肿;下肢动脉粥样硬化;胰腺恶性肿瘤	好转	陈亦明	王兆洪	莫之超	静脉注射化疗药物
2286	L211肝胆胰外科	2025-01-03	2025-01-12	3591167	吴美女	2	77Y	胆囊结石伴慢性胆囊炎急性发作	胆囊管结石;甲状腺结节;肾错构瘤;后天性肾囊肿;脂肪肝;肋骨骨折;下肢动脉硬化闭塞症;主动脉瓣关闭不全;二尖瓣反流;特发性(原发性)高血压;糖尿病	治愈	陈亦明	王兆洪	莫之超	腹腔镜下胆囊切除术
2287	L211肝胆胰外科	2025-01-20	2025-01-29	3598541	梅锡美	2	69Y	急性胰腺炎	胆囊结石;高血压;甲状腺功能减退症;骨继发恶性肿瘤;颈动脉闭塞;锁骨下动脉粥样硬化;下肢动脉粥样硬化;颈动脉硬化;陈旧性肋骨骨折;肺诊断性影像异常;后天性肾囊肿;甲状腺恶性肿瘤;肺继发恶性肿瘤;肝继发恶性肿瘤	治愈	刘海斌	刘海斌	陈冬冬
2288	L211肝胆胰外科	2025-01-28	2025-01-30	3599174	历森妹	2	86Y	后天性肾囊肿	肺气肿合并肺大泡;肺结节病;心房颤动;陈旧性肋骨骨折	好转	吕夕明	吕夕明	徐顺龙	肾囊肿硬化剂注射术
2289	L211肝胆胰外科	2025-01-27	2025-02-03	3600986	张小莲	2	64Y	胆道感染	陈旧性头部损伤;肝囊肿;胆囊息肉;肋骨骨折;结肠炎;肾上腺肿物	治愈	陈亦明	王兆洪	莫之超
2290	L211肝胆胰外科	2025-02-03	2025-02-09	3604175	易小平	1	47Y	肝细胞癌	后天性肾囊肿;陈旧性肺结核;乙型肝炎小三阳;掌骨骨折;肝功能检查的异常结果	治愈	刘海斌	刘海斌	陈冬冬	左半肝切除术
2291	L211肝胆胰外科	2025-02-03	2025-02-13	3605845	万成娒	1	55Y	肝细胞癌	肝硬化;乙型病毒性肝炎;代谢性骨病;病理性骨折，不可归类在他处者;骨质疏松;恶性肿瘤放射治疗后的随诊检查;肺肿物;前列腺结石;下肢动脉粥样硬化;结肠息肉	治愈	陈亦明	陈亦明	莫之超	超声引导下肝穿刺活检;超声引导下肝病损射频消融术
2292	L211肝胆胰外科	2025-02-23	2025-02-24	3608685	林金松	1	64Y	恶性肿瘤维持性化学治疗	胃恶性肿瘤;输尿管扩张;多发性肝囊肿;后天性肾囊肿;脊椎退行性病变;股骨粗隆间骨折;特发性(原发性)高血压;腹腔积液	好转	陈亦明	陈亦明	莫之超	静脉注射化疗药物
2293	L211肝胆胰外科	2025-02-24	2025-03-01	3611059	章握坑	1	77Y	胰腺恶性肿瘤	特发性(原发性)高血压;肺诊断性影像异常;肋骨骨折;后天性肾囊肿;下肢动脉粥样硬化	未愈	陈亦明	陈亦明	莫之超	超声引导下肝穿刺活检
2294	L211肝胆胰外科	2025-02-23	2025-03-04	3612173	冯亦做	1	66Y	后天性肾囊肿	低促性腺激素性性腺功能减退症;骨质疏松;腰椎压缩性骨折;胸椎压缩性骨折;高血压;颈动脉硬化;胆囊结石;下肢动脉硬化闭塞症;肺诊断性影像异常	治愈	吕夕明	吕夕明	马列	肾囊肿硬化剂注射术
2295	L211肝胆胰外科	2025-02-27	2025-03-19	3618670	刘红燕	2	59Y	肝胆管结石	胆总管扩张;胆囊结石伴慢性胆囊炎;高血压;2型糖尿病;后天性肾囊肿;肋骨骨折;肺部感染;甲状腺结节;脂肪肝;胆道感染	治愈	刘海斌	刘海斌	陈冬冬	腹腔镜-胆道镜联合探查取石术;腹腔镜下肝部分切除术;腹腔镜下胆囊切除术;腹腔镜下胆总管T管引流术
2296	L211肝胆胰外科	2025-03-25	2025-03-31	3623738	林金松	1	64Y	胃恶性肿瘤	恶性腹水;输尿管扩张;多发性肝囊肿;后天性肾囊肿;胸腰椎不稳定;胰腺肿瘤;股骨粗隆间骨折;高血压;肾积水伴肾结石	未愈	陈亦明	陈亦明	莫之超	腹腔穿刺引流术
2297	L211肝胆胰外科/胃肠外科/超声介入科	2025-04-04	2025-04-08	3627343	林金松	1	64Y	恶性肿瘤维持性化学治疗	恶性腹水;胃恶性肿瘤;肾盂积水，其他的;输尿管积水;多发性肝囊肿;后天性肾囊肿;脊椎退行性病变;胰腺肿瘤;骨折术后;特发性(原发性)高血压;腹腔继发恶性肿瘤	好转	陈亦明	周斌	高静	颈内静脉穿刺中心静脉置管术;静脉注射化疗药物
2298	L211肝胆胰外科/胃肠外科/超声介入科	2025-04-10	2025-04-21	3633059	高碎兰	2	71Y	肝挫伤	盆腔积液;肋骨骨折;特发性(原发性)高血压;2型糖尿病;眼术后	好转	陈亦明	陈亦明	高静	经导管肝动脉栓塞术;肝动脉造影
2299	L211肝胆胰外科/胃肠外科/超声介入科	2025-04-20	2025-04-22	3633585	李其该	1	63Y	恶性肿瘤维持性化学治疗	胃恶性肿瘤;高血压;骨折术后;恶性肿瘤靶向治疗	好转	李利义	俞耀军	陈健	静脉输液港植入术;静脉注射化疗药物
2300	L211肝胆胰外科/胃肠外科/超声介入科	2025-04-07	2025-04-27	3635788	王凤连	2	87Y	胆囊结石伴胆囊炎	股骨粗隆间骨折;高血压;后天性肾囊肿;2型糖尿病;肺部感染;肺诊断性影像检查的异常所见	治愈	陈亦明	王兆洪	高静	股骨骨折切开复位髓内针内固定术;超声引导下经皮肝穿刺胆管引流术
2301	L211肝胆胰外科/胃肠外科/超声介入科	2025-04-22	2025-05-01	3638073	郑祥元	1	57Y	急性胃溃疡伴有穿孔	高血压;后天性肾囊肿;肺诊断性影像异常;肩胛骨喙突骨折;脂肪肝;前列腺增生;前列腺钙化灶;前列腺钙化灶	治愈	刘海斌	刘海斌	陈冬冬
2302	L211肝胆胰外科/胃肠外科/超声介入科	2025-04-30	2025-05-02	3638490	叶震亚	1	67Y	恶性肿瘤维持性化学治疗	乙状结肠恶性肿瘤;肺诊断性影像异常;甲状腺结节;腰骶椎弓骨折;脊椎退行性病变;2型糖尿病	好转	周斌	陈亦明	高静	静脉注射化疗药物;静脉注射免疫制剂治疗
2303	L211肝胆胰外科/胃肠外科/超声介入科	2025-04-26	2025-05-07	3640530	陈进喜	1	74Y	双侧腹股沟直疝	脂肪肝;单纯性肾囊肿;前列腺增生;前列腺结石;高血压;矽肺;肺气肿;肾上腺术后;2型糖尿病性肾病;骨质疏松;胸椎压缩性骨折;腰椎压缩性骨折;颈椎骨折C7;肾结石;下肢动脉硬化闭塞症	治愈	杨越涛	杨越涛	姚志超	腹腔镜下双侧腹股沟斜疝修补术
2304	L211肝胆胰外科/胃肠外科/超声介入科	2025-05-17	2025-05-19	3646139	章握坑	1	77Y	恶性肿瘤维持性化学治疗	胰腺恶性肿瘤;肝病;肺诊断性影像异常;肋骨骨折;后天性肾囊肿;下肢动脉粥样硬化;前列腺增生;胰腺术后	好转	周斌	周斌	陈冬冬	静脉注射化疗药物
2305	L211肝胆胰外科/胃肠外科/超声介入科	2025-04-26	2025-05-21	3647423	吴世标	1	90Y	胆总管结石伴胆管炎	胆囊结石伴胆囊炎;Mirrizi综合征;肺部感染;脑梗死后遗症;特发性(原发性)高血压;2型糖尿病;十二指肠穿孔;骨折术后;下肢动脉粥样硬化;肢体动脉硬化性闭塞症;肝囊肿;后天性肾囊肿;胸腔积液;心包积液	治愈	陈亦明	周斌	陈冬冬	腹腔镜-胆道镜联合探查取石术;胆囊切开取石术;腹腔镜下肠粘连松解术;腹腔镜下胆总管T管引流术
2306	L211肝胆胰外科/胃肠外科/超声介入科	2025-05-17	2025-05-26	3649683	洪秋华	2	63Y	肝恶性肿瘤	胆囊结石伴慢性胆囊炎;后天性肾囊肿;肾挛缩;慢性乙型病毒性肝炎;脂肪肝;特发性(原发性)高血压;低蛋白血症;肋骨骨折;肝炎后肝硬化	好转	陈亦明	陈亦明	周功挺	腹腔镜下肝部分切除术;腹腔镜下胆囊切除术;开放性肝活组织检查;肠粘连松解术
2307	L211肝胆胰外科/胃肠外科/超声介入科	2025-05-10	2025-05-28	3650932	徐前义	1	33Y	胆囊结石伴胆囊炎	骨折术后;胸椎骨折T11/T12;肋骨骨折;肾结石;脂肪肝;高尿酸血症	治愈	刘海斌	刘海斌	莫之超	腹腔镜下胆囊切除术
2308	L211肝胆胰外科/胃肠外科/超声介入科	2025-05-13	2025-06-07	3655339	麻奶儿	2	77Y	肝内胆管癌	腹水;包裹性胸腔积液;脂肪肝;特发性(原发性)高血压;胆囊切除术后状态;动脉粥样硬化;胸椎压缩性骨折;腰椎骨折;腹腔感染	未愈	周斌	周斌	高静	经皮肝穿刺引流术;腹壁穿刺活检
2309	L211肝胆胰外科/胃肠外科/超声介入科	2025-06-08	2025-06-11	3657224	章握坑	1	77Y	恶性肿瘤维持性化学治疗	特发性(原发性)高血压;肺诊断性影像异常;肋骨骨折;后天性肾囊肿;下肢动脉粥样硬化;胰腺恶性肿瘤	好转	周斌	周斌	高静	静脉注射化疗药物
2310	L211肝胆胰外科/胃肠外科/超声介入科	2025-06-06	2025-06-16	3659602	周可忠	1	45Y	胃穿孔	胃恶性肿瘤;先天性肺大泡;肾结石;腹腔积液;肋骨骨折	治愈	陈亦明	陈亦明	陈克2	腹腔镜胃修补术;腹腔冲洗检查
2311	L211肝胆胰外科/胃肠外科/超声介入科	2025-06-09	2025-06-18	3660671	庄明坚	1	52Y	创伤性脾破裂	腹腔积血;肋骨骨折;肺大疱;胆囊切除术后状态	治愈	刘海斌	刘海斌	莫之超	脾病损或组织切除术;肠粘连松解术
2312	L211肝胆胰外科/胃肠外科/超声介入科	2025-06-06	2025-06-19	3661033	孙晓霞	2	51Y	肝挫伤	肝功能不全;肋骨骨折;血气胸;胆囊切除术后状态	好转	刘海斌	童洪飞	莫之超
2313	L211肝胆胰外科/胃肠外科/超声介入科	2025-06-21	2025-06-24	3663211	陈云祥	1	58Y	胆囊结石伴慢性胆囊炎	脂肪肝;脾大;自身免疫性溶血性贫血;动脉硬化;肋骨骨折;2型糖尿病	治愈	陈亦明	陈亦明	周功挺	腹腔镜下胆囊切除术
2314	L212肝胆胰外科	2025-01-21	2025-02-08	3603732	张秀莲	2	89Y	胆总管结石伴急性胆囊炎	胆囊结石伴慢性胆囊炎急性发作;脂肪肝;心房颤动;下肢深静脉血栓形成;冠状动脉粥样硬化性心脏病;陈旧性肋骨骨折;肺动脉高压;胸腔积液;后天性肾囊肿;下肢动脉粥样硬化;高血压;糖尿病	治愈	金洲祥	金洲祥	陈克2	腹腔镜-胆道镜联合探查取石术;腹腔镜下胆囊切除术;腹腔镜下胆总管T管引流术
2315	L212肝胆胰外科	2025-02-06	2025-02-09	3604281	林爱月	2	82Y	胆囊结石伴胆囊炎	胆总管结石;老年性脑萎缩;冠状动脉粥样硬化;陈旧性肋骨骨折;后天性肾囊肿	未愈	王继生	王继生	池出淮
2316	L212肝胆胰外科	2025-01-27	2025-02-19	3606643	吴美英	2	87Y	胰腺假囊肿	结肠瘘;胆总管结石伴急性化脓性胆管炎;慢性胰腺炎;急性冠脉综合征;急性心肌梗死;心功能不全;呼吸衰竭;心房颤动;肥厚性心肌病;十二指肠憩室;脂肪肝;肾结石;后天性肾囊肿;肋骨骨折;肺肿物;下肢动脉粥样硬化;静脉血栓形成;高血压;2型糖尿病;肺部感染;低蛋白血症;低钾血症;贫血	治愈	王继生	陈辉2	白炳隆	横结肠部分切除术;腹膜后脓肿切开引流术;腹膜后活检术;腹腔粘连松解术;胆管切开取石术（伴T管引流）;空肠造口术
2317	L212肝胆胰外科	2025-02-20	2025-02-25	3609286	金林娇	2	70Y	十二指肠恶性肿瘤	肝继发恶性肿瘤;恶病质;低蛋白血症;腹腔积液;心功能不全;下肢静脉血栓形成;肝囊肿;盆腔肿物;肺部感染;胸腔积液;骨折术后	未愈	王继生	陈辉2	白炳隆
2318	L212肝胆胰外科	2025-03-27	2025-03-27	3622464	张秀莲	2	89Y	胆总管残余结石	脂肪肝;肋骨骨折;心房颤动;冠状动脉粥样硬化性心脏病;二尖瓣退行性变;三尖瓣疾病,其他的;肺动脉高压;胸腔积液;后天性肾囊肿;下肢动脉血栓形成;下肢动脉粥样硬化;高血压;糖尿病;胆道术后	治愈	金洲祥	金洲祥	陈克2	经T管胆道镜下胆总管取石术
2319	L212肝胆胰外科	2025-03-17	2025-03-29	3622925	叶建余	1	58Y	肝胆管结石伴胆管炎	肝萎缩;慢性胆囊炎;肝功能检查的异常结果;低蛋白血症;低尿酸血症;胸腔积液;前列腺结石;陈旧性肋骨骨折;乙型肝炎小三阳	好转	陈辉2	陈辉2	章旭明	腹腔镜-胆道镜联合探查取石术;腹腔镜下肝叶切除术;腹腔镜下胆囊切除术;胆管切开取石术（伴T管引流）
2320	L212肝胆胰外科	2025-03-28	2025-03-31	3623821	姜文华	1	58Y	肾上腺良性肿瘤	后天性肾囊肿;肝囊肿;脂肪肝;结肠息肉;慢性胃炎;陈旧性肋骨骨折;高血压	治愈	陈映鹤	王怡君	柯润疆	腹腔镜肾上腺病损切除术;腹腔镜下肾周粘连松解术
2321	L212肝胆胰外科	2025-03-29	2025-04-06	3626167	盛久来	1	68Y	前列腺增生	包茎;尿道口狭窄;后天性肾囊肿;脂肪肝;陈旧性肋骨骨折;龟头炎	治愈	张磊	杨森	陈超豪2	经尿道前列腺切除术（TURP）;包皮环切术;尿道扩张;经尿道膀胱血块清除术;包皮瘢痕切除术;包皮粘连分离术
2322	L212肝胆胰外科	2025-04-06	2025-04-09	3627995	张菊英	2	73Y	梗阻性黄疸	肝占位性病变;肝硬化;门静脉高压;肺肿物;腹腔积液;胸腔积液;脾术后;骨折术后	好转	金洲祥	金洲祥	陈克2
2323	L212肝胆胰外科	2025-02-20	2025-04-12	3629096	包秀娇	2	71Y	胰腺良性肿瘤	胰瘘;胆汁淤积性肝炎;肝硬化;腹腔感染;脓毒血症;消化道出血;胃肠吻合口炎;失血性休克;胆囊炎;腹腔淋巴结肿大;肺部感染;梗阻性黄疸;肝功能不全;凝血时间延长;低蛋白血症;贫血;低钾血症;腹腔积液;盆腔积液;胸腔积液;室上性心动过速;后天性肾囊肿;陈旧性肋骨骨折	治愈	陈辉2	陈辉2	谢君青	根治性胰十二指肠切除术;腹腔粘连松解术;肾周围粘连松解术;经皮肝穿刺引流术;腹腔动脉造影;肠系膜上动脉造影;经导管胃动脉栓塞术;经皮肠系膜上动脉栓塞术;胸腔闭式引流术;胸腔闭式引流术;经皮肝穿刺引流术;胸腔闭式引流术;颈内静脉穿刺中心静脉置管术
2324	L212肝胆胰外科	2025-04-01	2025-04-13	3629531	陈秉云	1	66Y	肝恶性肿瘤	肝硬化失代偿期;腹水;低蛋白血症;肝性脑病;乙肝后肝硬化;后天性肾囊肿;前列腺增生;孤立性肺结节;陈旧性肋骨骨折;肺大疱;慢性细支气管炎;单侧腹股沟疝;肝功能检查的异常结果;前列腺结石	好转	陈辉2	陈辉2	谢君青
2325	L212肝胆胰外科	2025-04-06	2025-04-18	3631760	吴美英	2	87Y	血容量不足性休克	胆道术后;胆道感染;肺部感染;轻度营养不良;贫血;低蛋白血症;慢性肾功能不全;心功能不全;凝血功能异常;低钾血症;高血压;2型糖尿病;腹腔脓肿;低钠血症;低氯血症;陈旧性肋骨骨折;胆囊术后;结肠术后	治愈	陈辉2	陈辉2	谢君青	胆道镜检查术
2326	L212肝胆胰外科	2025-03-01	2025-04-23	3633948	洪士加	1	37Y	肝恶性肿瘤	肝硬化伴食管胃底静脉曲张;胃息肉;慢性胃炎;窦性心动过速;肺肿物;胆囊结石;股骨骨折;脾功能亢进;股骨头缺血性坏死;2型糖尿病;脾大	好转	金洲祥	金洲祥	陈克2	部分肝切除术;贲门周围血管离断术;胃镜检查;胸腔穿刺抽液术;腹腔穿刺引流术;呼吸机治疗[小于96小时];气管内插管;血管缝合术;胃底横断术;肝病损切除术
2327	L212肝胆胰外科	2025-04-20	2025-05-01	3638282	黄建珠	2	76Y	胆总管结石伴胆管炎	肝恶性肿瘤;梗阻性黄疸;慢性乙型病毒性肝炎;肝硬化失代偿期;胆囊结石伴慢性胆囊炎;2型糖尿病;高血压;白细胞减少;脾大;后天性肾囊肿;手术后恢复期;骨折术后;血管支架植入术后状态	好转	廖毅	廖毅	白炳隆	内镜去除胆管结石;内镜逆行胰胆管造影[ERCP];内镜下十二指肠乳头肌切开术(EST);内镜下十二指肠球囊扩张术;内镜下鼻胆管引流术
2328	L212肝胆胰外科	2025-05-05	2025-05-12	3642665	刘科伟	1	41Y	脾损伤	肋骨骨折;肺挫伤;急性失血性贫血;腹腔积血;创伤性胸腔积液;肝钙化灶;椎间盘突出;肌腱和肌肉损伤	好转	金洲祥	金洲祥	白炳隆
2329	L212肝胆胰外科	2025-04-20	2025-05-13	3643385	邱龙发	1	52Y	创伤性结肠破裂	创伤性空肠破裂;腹腔粘连;脐疝;眶骨骨折;肾挫伤;肺挫伤;肋骨骨折;肾挛缩;肾积水伴肾结石;开放性脑挫伤;胸腔积液;腹腔积液;低钾血症;低钠血症;肝功能不全;头皮血肿;创伤性蛛网膜下出血;胃术后	治愈	王继生	林建华	章旭明	乙状结肠部分切除术;降结肠裂伤修补术;眶骨骨折切开复位内固定术;空肠裂伤修补术;脐疝修补术;腹腔粘连松解术;结肠造口术;乙状结肠裂伤修补术;眼眶伤口修补术
2330	L212肝胆胰外科	2025-05-10	2025-05-19	3646166	林秀妹	2	66Y	胆总管结石伴胆管炎	胆囊结石伴慢性胆囊炎;肾结石;肝钙化灶;陈旧性肋骨骨折;肠粘连	治愈	王向昱	王向昱	池出淮	腹腔镜下胆囊切除术;腹腔镜下肠粘连松解术;胆道镜检查术;内镜逆行胰胆管造影[ERCP];内镜下十二指肠乳头肌切开取石术;内镜下鼻胆管引流术
2331	L212肝胆胰外科	2025-05-13	2025-05-20	3646679	钱爱英	2	58Y	胆囊结石伴慢性胆囊炎	取除骨折内固定装置;肺肿物	治愈	王向昱	王向昱	池出淮	腹腔镜下胆囊切除术;骨置入装置去除
2332	L212肝胆胰外科	2025-06-02	2025-06-04	3654378	项巧月	2	81Y	胆囊炎	脑梗死后遗症;肝功能检查的异常结果;肺部感染;高血压;2型糖尿病;股骨髋部骨折	好转	王向昱	池出淮	池出淮	抗感染药物注射;穴位贴敷治疗
2333	L212肝胆胰外科	2025-05-18	2025-06-12	3658173	方兰妹	2	49Y	创伤性胃破裂	眶骨骨折;颧弓骨折;上颌骨骨折;胸腔积液;腹腔积液;创伤性颅内积气;胆囊息肉;颈椎退行性病变;盆腔积液;创伤性气胸;多处挫伤;肝占位性病变;慢性胃炎;开放性肠系膜血肿	治愈	王继生	林建华	章旭明	胃袖状切除术;胃破裂修补术;胸腔闭式引流术;眶骨骨折切开复位内固定术;腹腔脓肿切开引流术;腹腔冲洗检查;腹腔穿刺药物注射;腹腔穿刺引流术;上颌骨骨折切开复位内固定术;颧骨骨折切开复位内固定术
2334	L212肝胆胰外科	2025-06-08	2025-06-12	3658330	李雪行	1	46Y	手术后恶性肿瘤化学治疗	恶性肿瘤术后免疫治疗;肝胆管恶性肿瘤;骨继发恶性肿瘤;肺继发恶性肿瘤;腹腔淋巴结肿大;慢性肝病;肋骨骨折;脾大;后天性肾囊肿	好转	金洲祥	廖毅	白炳隆	静脉输液港植入术;静脉注射免疫制剂治疗;静脉注射化疗药物
2335	L212肝胆胰外科	2025-06-07	2025-06-22	3662096	吴彩琴	2	67Y	肾输尿管结石伴有积水和感染	后天性肾囊肿;腰椎退行性病变;骨质疏松伴有病理性骨折;高血压;胸椎压缩性骨折;脑梗死;老年性脑萎缩;骨折术后;孤立性肺结节	治愈	余凯远	余凯远	范来来	经皮肾镜碎石术（PCNL）;经尿道输尿管支架置入术;肾穿刺术
2336	L213颈部外科	2025-02-28	2025-03-05	3612604	沈乐燕	2	48Y	甲状腺恶性肿瘤	结节性甲状腺肿;甲状腺结节;肺诊断性影像异常;2型糖尿病;肋骨骨折;脂肪肝;肾错构瘤;糖尿病	好转	张银龙	许远	许远	单侧甲状腺切除伴甲状腺峡部切除术;根治性颈淋巴结清扫，单侧;喉返神经探查术
2337	L213颈部外科/血管外科	2025-04-18	2025-04-23	3633904	杜玲璨	2	6Y	颈部淋巴管瘤	陈旧性锁骨骨折;上颌窦炎;筛窦炎	好转	董剑达	蒋正财	韩一帆	皮下组织病损切除术
2338	L213颈部外科/血管外科	2025-06-21	2025-06-26	3664189	李凤莲	2	59Y	结节性甲状腺肿	自身免疫性甲状腺炎;下肢动脉粥样硬化;肝囊肿;肾错构瘤;肋骨骨折	治愈	张银龙	许远	潘笑宇	单侧甲状腺切除伴甲状腺峡部切除术;喉返神经探查术
2339	L214泌尿外科	2024-12-19	2025-01-05	3588142	尚伯余	1	71Y	前列腺增生	后天性肾囊肿;肾结石;2型糖尿病;高血压病1级（极高危）;高脂血症;肋骨骨折;肺肿物	治愈	饶大庞	木海琦	饶大庞	其他经尿道前列腺切除术
2340	L214泌尿外科	2024-12-31	2025-01-18	3593404	石福存	1	89Y	睾丸鞘膜积液	股骨粗隆间骨折	治愈	张磊	陈超豪2	陈超豪2	睾丸鞘膜切除术;睾丸鞘膜翻转术;睾丸固定术;阴囊病损切除术;阴囊切开引流术;股骨骨折闭合复位髓内针内固定术
2341	L214泌尿外科	2025-01-08	2025-01-19	3593944	周春花	2	83Y	后天性肾囊肿	冠状动脉粥样硬化;支气管哮喘;肺肿物;2型糖尿病;特发性(原发性)高血压;肋骨多处骨折;脂肪肝;胆囊息肉;腰椎骨折;甲状腺术后;甲状腺结节;颈动脉硬化;下肢动脉粥样硬化	好转	陈映鹤	南存金	柯润疆	多根导管冠状动脉造影;肾囊肿硬化剂注射术
2342	L214泌尿外科	2025-01-07	2025-01-28	3597888	唐成珠	1	70Y	前列腺增生	膀胱结石;肺肿物;脂肪肝;后天性肾囊肿;肋骨骨折;前列腺结石	治愈	何有华	何有华	范来来	经尿道前列腺切除术（TURP）;肺穿刺活检;超声引导下胸腔穿刺术;经尿道膀胱血块清除术
2343	L214泌尿外科	2025-01-29	2025-02-06	3602519	胡崇贤	1	60Y	肾恶性肿瘤	后天性肾囊肿;脂肪肝;胆囊结石;腰椎骨折	治愈	何有华	何有华	范来来	腹腔镜下单侧肾切除术;腹腔镜下肾周粘连松解术
2344	L214泌尿外科	2025-02-27	2025-03-05	3612921	叶爱梅	2	53Y	肾积水伴输尿管结石	创伤性截瘫;脊髓损伤;神经源性膀胱;神经源性肠;运动障碍;胸椎术后;骨折术后;取出内固定装置;骶髂关节脱位;陈旧性肋骨骨折;多处骨折;腰椎间盘突出;后天性肾囊肿;高脂血症;腰骶椎间盘突出	治愈	陈映鹤	王怡君	柯润疆	经尿道输尿管镜肾盂激光碎石术
2345	L214泌尿外科	2025-03-04	2025-03-09	3614466	陈崇花	2	90Y	肾积脓	子宫恶性肿瘤;血尿;输尿管扩张;后天性肾囊肿;下肢动脉粥样硬化;下肢动脉粥样硬化闭塞症;特发性肺纤维化;肋骨骨折	治愈	陈映鹤	王怡君	柯润疆	膀胱镜检查
2346	L214泌尿外科	2025-03-18	2025-03-22	3619959	李泽云	1	59Y	创伤后尿道狭窄	排尿困难;骨盆骨折;肾结石;肝囊肿;肝钙化灶;前列腺增生;前列腺结石	好转	陈映鹤	王怡君	柯润疆	尿道镜检查;尿道扩张
2347	L214泌尿外科	2025-03-21	2025-04-08	3627375	黄忠存	1	67Y	肾错构瘤	后天性肾囊肿;腰椎骨折L2;肋骨多处骨折;肺挫伤;胸腔积液;下肢静脉血栓形成;胸椎骨折T9/T10	治愈	何有华	何有华	范来来	腹腔镜下单侧肾切除术;腹腔镜下肾周粘连松解术;腹腔镜下盆腔粘连松解术
2348	L214泌尿外科	2025-03-26	2025-04-21	3633111	冯堂升	1	51Y	创伤性硬脑膜外出血	头皮血肿;骨盆骨折;尿道损伤;尿道狭窄;颞骨骨折;颧弓骨折;肺部感染;腰椎骨折L1;腹部软组织损伤;后天性肾囊肿;腹腔积液	治愈	竺海波	虞海峰	刘翔	硬膜外脓肿清除术;骨盆骨折闭合性复位术;膀胱穿刺术
2349	L214泌尿外科	2025-04-20	2025-04-22	3633621	林爱芬	1	44Y	肾输尿管结石伴有积水和感染	膀胱结石;后天性肾囊肿;神经源性膀胱;肾挛缩;前列腺增生;骨折术后;截瘫;脂肪肝;特发性(原发性)高血压	治愈	竺海波	虞海峰	刘翔	经尿道输尿管/肾盂激光碎石术;经尿道膀胱镜膀胱激光碎石术
2350	L214泌尿外科	2025-04-09	2025-04-30	3637673	项玉钗	2	72Y	肾输尿管结石伴有积水和感染	脓毒性休克;肾功能不全;阵发性室上性心动过速;脂肪肝;特发性(原发性)高血压;主动脉钙化;多发性脑梗死;下肢动脉粥样硬化;青光眼术后;乳腺术后;陈旧性耻骨骨折	治愈	陈映鹤	王怡君	柯润疆	经尿道输尿管/肾盂激光碎石取石术;经尿道输尿管支架置入术
2351	L214泌尿外科	2025-04-30	2025-05-02	3638462	施德仁	1	84Y	膀胱多处恶性肿瘤	前列腺增生;后天性肾囊肿;前列腺结石;头晕;脑白质病;腔隙性脑梗死;老年性脑萎缩;下肢动脉粥样硬化;主动脉钙化;骨折术后	好转	陈映鹤	王怡君	柯润疆	经尿道膀胱病损电切术
2352	L214泌尿外科	2025-04-28	2025-05-04	3639122	文后和	1	46Y	尿道球部断裂	耻骨骨折;后天性肾囊肿;陈旧性肺结核;肺大疱	治愈	余凯远	余凯远	范来来	尿道修补术;膀胱镜检查
2353	L214泌尿外科	2025-04-30	2025-05-17	3645141	谢秀娥	2	67Y	肾上腺良性肿瘤	原发性醛固酮增多症[低肾素性醛固酮增多症];2型糖尿病;高血压;骨折术后;低钾血症	治愈	何有华	何有华	范来来	腹腔镜肾上腺部分切除术;腹腔镜下肾周粘连松解术
2354	L214泌尿外科	2025-05-29	2025-06-03	3653659	施国泰	1	57Y	创伤性尿道断裂	耻骨骨折	好转	何有华	王帅彬	范来来	尿道镜检查;膀胱穿刺术
2355	L214泌尿外科	2025-06-03	2025-06-18	3660613	王爱箱	2	72Y	肾积脓	输尿管扩张;2型糖尿病性肾病;2型糖尿病性周围神经病;2型糖尿病性视网膜病变;高血压性心脏病;心房颤动;冠状动脉粥样硬化;脑缺血灶;颈动脉硬化;下肢动脉粥样硬化;腰椎退行性病变;膝关节退行性病变;腰椎间盘突出;肺部感染;肋骨骨折	治愈	陈映鹤	南存金	王怡君	经尿道输尿管支架置入术;关节穿刺术
2356	L214泌尿外科	2025-06-10	2025-06-19	3661190	施国泰	1	57Y	创伤性尿道断裂	阴囊脓肿;耻骨骨折	好转	余凯远	王帅彬	范来来
2357	L215血液肿瘤科	2025-01-02	2025-01-05	3588396	朱松琴	2	71Y	恶性肿瘤维持性化学治疗	肺恶性肿瘤;全身性广泛继发恶性肿瘤;阻塞性肺炎;高血压;骨折术后;骨质疏松;胸腔积液	好转	林颖	林颖	方玮玥	静脉注射化疗药物
2358	L215血液肿瘤科	2024-12-30	2025-01-06	3588819	林春香	2	76Y	恶性肿瘤维持性化学治疗	多发性骨髓瘤;继发性血小板减少;骨折术后;高血压性心脏病;骨质疏松;下肢动脉粥样硬化;肺肿物	好转	林颖	林颖	方玮玥	静脉注射化疗药物
2359	L215血液肿瘤科	2024-12-28	2025-01-11	3590681	黄聪福	1	80Y	慢性阻塞性肺病伴有急性加重	肺部感染;肺恶性肿瘤;完全性右束支传导阻滞;糜烂性胃炎;食管炎;食管裂孔疝;胸椎压缩性骨折	好转	林颖	林颖	周晓海	抗肿瘤免疫治疗
2360	L215血液肿瘤科	2025-01-07	2025-01-14	3592056	刘章娥	2	79Y	多发性骨髓瘤	肺部感染;心力衰竭;肾性贫血;骨继发恶性肿瘤;骨质破坏;肋骨骨折;颈椎病;肺肿物;老年性脑萎缩;肝回声不均;后天性肾囊肿;甲状腺结节;肾上腺增粗;由于其他原因而未进行操作	未愈	姚荣欣	孙妮	孙妮
2361	L215血液肿瘤科	2024-12-22	2025-01-15	3592538	欧阳建国	1	67Y	骨髓增生异常综合征	感染性休克;肺部感染;弥漫大B细胞淋巴瘤;胸腔积液;心包积液;肝病;陈旧性股骨骨折	好转	姚荣欣	孙妮	孙妮	静脉注射化疗药物;骨髓活组织检查;骨髓穿刺术
2362	L215血液肿瘤科	2025-01-15	2025-01-17	3593097	林春香	2	76Y	恶性肿瘤维持性化学治疗	多发性骨髓瘤;继发性血小板减少;高血压性心脏病;骨折术后;骨质疏松;下肢动脉硬化闭塞症;孤立性肺结节	好转	林颖	林颖	周晓海	静脉注射化疗药物
2363	L215血液肿瘤科	2024-12-22	2025-01-18	3593662	刘福深	1	59Y	肺恶性肿瘤	肝继发恶性肿瘤;纵隔淋巴结继发恶性肿瘤;肺动脉栓塞;骨继发恶性肿瘤;椎体继发恶性肿瘤;肿瘤性病理性骨折;阻塞性肺炎;慢性乙型病毒性肝炎;凝血功能障碍;肺肿物;肺气肿合并肺大泡;胸腔积液;腰椎椎管狭窄;肝功能不全;肾上腺结节性增生;单侧腹股沟疝;前列腺钙化灶;脂肪肝	未愈	郭文坚	何牧卿	杨向绸	经皮肝穿刺活检
2364	L215血液肿瘤科	2025-01-16	2025-01-19	3594073	叶阿省	1	79Y	红细胞增多	皮肤肿瘤;特发性(原发性)高血压;高脂血症;陈旧性肋骨骨折;前列腺增生;胆囊结石;后天性肾囊肿;肾结石;颈动脉硬化;前列腺结石;下肢动脉粥样硬化	未愈	姚荣欣	孙妮	孙妮
2365	L215血液肿瘤科	2025-01-18	2025-01-20	3594635	朱松琴	2	72Y	恶性肿瘤维持性化学治疗	肺恶性肿瘤;全身性广泛继发恶性肿瘤;阻塞性肺炎;高血压;胸椎压缩性骨折;骨质疏松;胸腔积液	好转	林颖	林颖	方玮玥	静脉注射化疗药物
2366	L215血液肿瘤科	2025-01-14	2025-01-23	3595934	叶爱华	2	63Y	恶性肿瘤维持性化学治疗	多发性骨髓瘤;泌尿道感染;肋骨多处骨折;胸椎骨折;胸椎退行性病变;腰椎退行性病变;腰椎间盘突出;房性期前收缩[房性早搏]	好转	姚荣欣	孙妮	孙妮	静脉注射化疗药物
2367	L215血液肿瘤科	2025-01-16	2025-01-26	3596794	赵秀君	2	72Y	恶性肿瘤维持性化学治疗	多发性骨髓瘤;慢性顽固性疼痛;肋骨骨折;睡眠障碍;高血压;2型糖尿病;慢性乙型病毒性肝炎	好转	林颖	林颖	周晓海	静脉注射化疗药物
2368	L215血液肿瘤科	2025-01-16	2025-01-27	3597234	黄聪福	1	80Y	慢性阻塞性肺病伴有急性加重	肺部感染;肺恶性肿瘤;室性期前收缩;完全性右束支传导阻滞;糜烂性胃炎;食管炎;食管裂孔疝;胸椎压缩性骨折	好转	林颖	林颖	周晓海
2369	L215血液肿瘤科	2025-01-22	2025-01-28	3598155	黄福银	1	72Y	骨继发恶性肿瘤	多部位淋巴结继发恶性肿瘤;颈部恶性肿瘤;腰椎椎管狭窄;腰椎间盘突出;胸椎压缩性骨折;EB病毒感染;特发性(原发性)高血压;脂肪肝;肾结石;后天性肾囊肿;前列腺增生;颈动脉硬化;慢性乳突炎;慢性支气管炎伴肺气肿;下肢动脉粥样硬化	未愈	郭文坚	何牧卿	杨向绸
2370	L215血液肿瘤科	2025-02-01	2025-02-01	3599909	黄聪福	1	80Y	恶性肿瘤免疫治疗	肺恶性肿瘤;慢性阻塞性肺病;完全性右束支传导阻滞;室性期前收缩;急性糜烂性胃炎;食管炎;食管裂孔疝;颈椎骨折C7	好转	林颖	林颖	周晓海	抗肿瘤免疫治疗
2371	L215血液肿瘤科	2025-01-02	2025-02-04	3601248	谢美琴	2	71Y	创伤性急性硬膜下出血	脑挫伤;创伤性蛛网膜下出血;肋骨多处骨折;慢性失血性贫血;泌尿道感染;肺肿物;肝硬化;盆腔积液	治愈	郭文坚	何牧卿	杨向绸	颅内血肿清除术
2372	L215血液肿瘤科	2025-02-02	2025-02-04	3601530	朱松琴	2	72Y	恶性肿瘤维持性化学治疗	肺恶性肿瘤;胸椎压缩性骨折;骨继发恶性肿瘤;阻塞性肺炎;高血压;骨质疏松;胸腔积液	好转	林颖	林颖	方玮玥	静脉注射化疗药物
2373	L215血液肿瘤科	2025-02-07	2025-02-07	3603353	林春香	2	76Y	恶性肿瘤维持性化学治疗	多发性骨髓瘤;继发性血小板减少;高血压性心脏病;胸椎骨折;骨质疏松;动脉硬化;肺肿物	好转	林颖	林颖	方玮玥	静脉注射化疗药物
2374	L215血液肿瘤科	2025-02-04	2025-02-09	3604120	叶爱华	2	63Y	恶性肿瘤维持性化学治疗	多发性骨髓瘤;肋骨多处骨折;胸椎骨折;肝内钙化点;胸椎退行性病变;腰椎退行性病变;腰椎椎管狭窄;腰椎间盘突出;房性期前收缩[房性早搏]	好转	姚荣欣	孙妮	孙妮	静脉注射化疗药物
2375	L215血液肿瘤科	2025-02-22	2025-02-22	3607993	黄聪福	1	80Y	恶性肿瘤免疫治疗	肺恶性肿瘤;慢性阻塞性肺病;心律失常;糜烂性胃炎;食管炎;食管裂孔疝;胸椎压缩性骨折	好转	林颖	林颖	周晓海	抗肿瘤免疫治疗
2376	L215血液肿瘤科	2025-02-17	2025-02-22	3607997	朱松琴	2	72Y	恶性肿瘤维持性化学治疗	肺恶性肿瘤;全身性广泛继发恶性肿瘤;胸腔积液;阻塞性肺炎;高血压;骨折术后;骨质疏松;轻度贫血	好转	林颖	林颖	方玮玥	胸腔穿刺抽液术;静脉注射化疗药物
2377	L215血液肿瘤科	2025-02-15	2025-02-23	3608109	裘姜金	1	73Y	阵发性睡眠性血红蛋白尿	肠系膜动脉血栓形成;原发性血小板增多症;2型糖尿病;特发性(原发性)高血压;肾移植状态;肾挛缩;后天性肾囊肿;肝囊肿;骨折术后	好转	郭文坚	何牧卿	杨向绸
2378	L215血液肿瘤科	2025-02-25	2025-02-27	3610146	朱福林	1	66Y	恶性肿瘤维持性化学治疗	多发性骨髓瘤;感觉性周围神经病;2型糖尿病;肋骨骨折;胆囊结石	其他	姚荣欣	孙妮	孙妮	静脉注射化疗药物
2379	L215血液肿瘤科	2025-02-15	2025-02-28	3610729	叶爱华	2	63Y	多发性骨髓瘤	肌无力;脊柱术后;肋骨骨折;胸椎骨折;多发性肝囊肿;胸椎退行性病变;腰椎退行性病变;腰椎间盘突出;房性期前收缩[房性早搏]	好转	姚荣欣	孙妮	孙妮
2380	L215血液肿瘤科	2025-01-21	2025-03-01	3610962	欧阳建国	1	67Y	弥漫大B细胞淋巴瘤	肺部感染;骨髓增生异常综合征;胸腔积液;心包积液;肝占位性病变;陈旧性股骨骨折	未愈	姚荣欣	孙妮	孙妮	骨髓穿刺术;闭合性[内镜的]支气管活组织检查
2381	L215血液肿瘤科	2025-02-28	2025-03-08	3614199	徐贤海	1	67Y	多发性骨髓瘤	胸椎骨折;腰椎骨折;老年性骨质疏松;肝囊肿	好转	何牧卿	郭文坚	杨向绸	髂骨活检术;静脉注射化疗药物;骨髓穿刺术
2382	L215血液肿瘤科	2025-03-04	2025-03-09	3614261	朱松琴	2	72Y	恶性胸腔积液	肺恶性肿瘤;骨继发恶性肿瘤;阻塞性肺炎;高血压;胸椎压缩性骨折;骨质疏松	好转	林颖	林颖	周晓海	胸腔穿刺抽液术;胸腔内注射
2383	L215血液肿瘤科	2025-03-10	2025-03-12	3616104	戴秀凤	2	71Y	多发性骨髓瘤	肾性贫血;肺肿物;高血压心脏病伴心力衰竭;心功能Ⅱ级;肺动脉高压中度;2型糖尿病;后天性肾囊肿;下肢动脉硬化闭塞症;甲状腺结节;肺大疱;肝囊肿;胸椎压缩性骨折;二尖瓣反流;三尖瓣关闭不全	好转	何牧卿	郭文坚	杨向绸	骨髓穿刺术
2384	L215血液肿瘤科	2025-03-15	2025-03-15	3617112	黄聪福	1	81Y	恶性肿瘤免疫治疗	肺恶性肿瘤;慢性阻塞性肺病;完全性右束支传导阻滞;室性期前收缩;糜烂性胃炎;食管炎;胸椎压缩性骨折	好转	林颖	林颖	周晓海	抗肿瘤免疫治疗
2385	L215血液肿瘤科	2025-03-19	2025-03-25	3621457	裘姜金	1	73Y	阵发性睡眠性血红蛋白尿	原发性血小板增多症;2型糖尿病;特发性(原发性)高血压;肾移植状态;骨折术后;肾挛缩;后天性肾囊肿;肝囊肿	好转	何牧卿	郭文坚	杨向绸
2386	L215血液肿瘤科	2025-03-30	2025-03-31	3624127	朱福林	1	66Y	恶性肿瘤维持性化学治疗	多发性骨髓瘤;2型糖尿病;感觉性周围神经病;胆囊结石;肋骨骨折	好转	姚荣欣	孙妮	孙妮	静脉注射化疗药物;骨髓活组织检查;骨髓穿刺术
2387	L215血液肿瘤科	2025-04-05	2025-04-05	3626147	黄聪福	1	81Y	恶性肿瘤免疫治疗	肺恶性肿瘤;慢性阻塞性肺病;室性期前收缩;完全性右束支传导阻滞;糜烂性胃炎;食管炎;食管裂孔疝;胸椎压缩性骨折	好转	林颖	林颖	方玮玥	抗肿瘤免疫治疗
2388	L215血液肿瘤科	2025-04-05	2025-04-08	3627177	林茶柳	2	83Y	血小板增多	白细胞增多症;特发性(原发性)高血压;糖尿病;桡骨骨折;睡眠障碍;脂肪肝;脾大;后天性肾囊肿	未愈	何牧卿	何牧卿	周晓海	骨髓穿刺术;骨髓活组织检查
2389	L215血液肿瘤科	2025-04-06	2025-04-09	3627548	周秀珠	2	70Y	恶性肿瘤维持性化学治疗	多发性骨髓瘤;高血压;骨折术后;腰骶椎间盘突出;椎间盘变性;脊柱侧弯;间质性肺病;肺部感染;脂肪肝;肝内钙化点;骨质疏松	好转	林颖	林颖	方玮玥	骨髓穿刺术;静脉注射化疗药物
2390	L215血液肿瘤科	2025-03-13	2025-04-09	3627613	徐贤海	1	67Y	十二指肠糜烂出血	多发性骨髓瘤;化疗后骨髓抑制;肺部感染;急性肾功能不全;急性左心衰竭;骨质疏松伴有病理性骨折;腰椎骨折;肝囊肿;慢性胃炎;食管裂孔疝;下肢动脉粥样硬化;肺肿物;胸椎骨折	治愈	郭文坚	郭文坚	周晓海	内镜下十二指肠钛夹止血术;连续性肾脏替代治疗[CRRT];胃镜检查
2391	L215血液肿瘤科	2025-03-22	2025-04-09	3627945	林友任	1	82Y	为肿瘤化学治疗疗程	骨髓增生异常综合征;化疗后骨髓抑制;间质性肺炎;胸腔积液;心包积液;腹腔积液;慢性龈炎;频发性房性期前收缩;室性期前收缩;不完全性右束支传导阻滞;肺动脉高压中度;慢性胃炎;胃息肉;骨折术后	好转	姚荣欣	孙妮	孙妮	静脉注射化疗药物
2392	L215血液肿瘤科	2025-04-14	2025-04-24	3634860	王崇妹	2	85Y	甲状腺恶性肿瘤	颈部局部肿物;心功能不全;肋骨多处骨折;非毒性多个甲状腺结节;肝内胆管炎;胆囊结石;胆总管结石;后天性肾囊肿;下肢动脉粥样硬化;主动脉(瓣)关闭不全	未愈	何牧卿	何牧卿	周晓海	超声引导下经皮甲状腺活组织检查术
2393	L215血液肿瘤科	2025-04-26	2025-04-26	3635560	黄聪福	1	81Y	恶性肿瘤维持性化学治疗	肺恶性肿瘤;慢性阻塞性肺病;室性期前收缩;完全性右束支传导阻滞;糜烂性胃炎;食管炎;食管裂孔疝;胸椎压缩性骨折	好转	林颖	林颖	方玮玥	静脉注射化疗药物
2394	L215血液肿瘤科	2025-04-27	2025-05-04	3639175	黄兰英	2	74Y	缺铁性贫血	泌尿道感染;慢性胃炎;升结肠良性肿瘤;肺肿物;特发性(原发性)高血压;白癜风;痛风;肝囊肿;后天性肾囊肿;颈动脉硬化;下肢动脉粥样硬化;下肢静脉血栓形成;肋骨骨折	好转	姚荣欣	黄河2	黄樾樾	胃镜检查;结肠镜下大肠活组织检查
2395	L215血液肿瘤科	2025-05-04	2025-05-08	3641192	吴李花	2	67Y	恶性肿瘤维持性化学治疗	直肠恶性肿瘤;肺部继发性恶性肿瘤;哮喘;颈动脉硬化;特发性(原发性)高血压;痛风;轻度贫血;肋骨骨折;淋巴结钙化;多发性肝囊肿;胆囊结石;后天性肾囊肿;锁骨下动脉粥样硬化;下肢动脉粥样硬化	好转	姚荣欣	黄河2	黄樾樾	静脉注射化疗药物
2396	L215血液肿瘤科	2025-05-17	2025-05-17	3645562	黄聪福	1	81Y	恶性肿瘤免疫治疗	肺恶性肿瘤;慢性阻塞性肺病;室性期前收缩;糜烂性胃炎;食管炎;食管裂孔疝;胸椎压缩性骨折;冈上肌肌腱损伤;二头肌长头肌腱损伤	好转	林颖	林颖	杨向绸	抗肿瘤免疫治疗
2397	L215血液肿瘤科	2025-05-11	2025-05-19	3646365	周秀珠	2	71Y	恶性肿瘤维持性化学治疗	多发性骨髓瘤;高血压;低钾血症;骨折术后;颈椎间盘突出;椎间盘变性;关节结核;脊柱侧弯;肺间质纤维化;呼吸道感染;脂肪肝;肝钙化灶;骨质疏松	好转	林颖	林颖	杨向绸	静脉注射化疗药物
2398	L215血液肿瘤科	2025-04-28	2025-05-19	3646484	方以栈	1	77Y	纵隔恶性肿瘤	慢性阻塞性肺疾病I级;支气管扩张伴感染;肺结节病;肺气肿;肺大疱;下肢动脉粥样硬化;肝囊肿;脑缺血灶;老年性脑萎缩;肾结石;肋骨骨折	好转	姚荣欣	黄河2	黄樾樾	空肠造口术;颈淋巴结活组织检查;颈内静脉穿刺中心静脉置管术
2399	L215血液肿瘤科	2025-05-17	2025-05-20	3646788	朱松琴	2	72Y	肺恶性肿瘤	骨继发恶性肿瘤;恶性胸腔积液;低钾血症;高血压;肺动脉高压;骨折术后;骨质疏松;阻塞性肺炎;多部位淋巴结继发恶性肿瘤;窦性心动过速	好转	林颖	林颖	杨向绸
2400	L215血液肿瘤科	2025-05-19	2025-05-23	3648309	吴李花	2	67Y	恶性肿瘤维持性化学治疗	直肠恶性肿瘤;肺继发恶性肿瘤;哮喘;颈动脉硬化;特发性(原发性)高血压;痛风;轻度贫血;肋骨骨折;纵隔淋巴结炎;肺门淋巴结炎;多发性肝囊肿;胆囊结石;后天性肾囊肿;下肢动脉粥样硬化	好转	姚荣欣	黄河2	黄河2	静脉注射化疗药物
2401	L215血液肿瘤科	2025-05-23	2025-05-29	3651232	裘姜金	1	73Y	阵发性睡眠性血红蛋白尿	原发性血小板增多症;2型糖尿病;特发性(原发性)高血压;肾移植状态;骨折术后;肾挛缩;后天性肾囊肿;肝囊肿	好转	何牧卿	孙妮	孙妮
2402	L215血液肿瘤科	2025-05-19	2025-05-29	3651314	廖大英	2	48Y	创伤性蛛网膜下腔出血	血小板减少;轻度贫血;肋骨骨折;多处挫伤;肺肿物;上颌窦炎	治愈	林颖	林颖	杨向绸	骨髓活组织检查;骨髓穿刺术
2403	L215血液肿瘤科	2025-06-03	2025-06-07	3655412	吴李花	2	67Y	恶性肿瘤维持性化学治疗	直肠恶性肿瘤;肺继发恶性肿瘤;哮喘;颈动脉硬化;特发性(原发性)高血压;痛风;轻度贫血;肋骨骨折;淋巴结钙化;肝囊肿;胆囊结石;后天性肾囊肿;下肢动脉粥样硬化	好转	姚荣欣	黄河2	黄樾樾	静脉注射化疗药物
2404	L215血液肿瘤科	2025-05-11	2025-06-07	3655657	林永珠	1	70Y	多发性骨髓瘤	急性胆囊炎;胸椎骨折;骨质疏松;高血压;高血压性心脏病;心房颤动;具有心脏起搏器;老年性心脏瓣膜病;前列腺结石;肝囊肿;慢性胃炎	好转	何牧卿	周晓海	周晓海	骨髓穿刺术;皮下注射化疗药物;骨髓活组织检查;胃镜检查
2405	L215血液肿瘤科	2025-06-07	2025-06-07	3655668	黄聪福	1	81Y	恶性肿瘤免疫治疗	肺恶性肿瘤;慢性阻塞性肺病;室性期前收缩;完全性右束支传导阻滞;糜烂性胃炎;食管炎;食管裂孔疝;胸椎压缩性骨折	好转	林颖	林颖	杨向绸	静脉注射免疫制剂治疗
2406	L215血液肿瘤科	2025-06-07	2025-06-08	3656185	斯建国	1	62Y	面部皮肤嗜酸性粒细胞增生性淋巴肉芽肿	高尿酸血症;高脂血症;肋骨骨折;肺肿物;下肢动脉粥样硬化;后天性肾囊肿;Ⅰ度房室传导阻滞	好转	林颖	林颖	方玮玥	静脉注射化疗药物
2407	L215血液肿瘤科	2025-06-07	2025-06-22	3662423	赵秀君	2	72Y	恶性肿瘤维持性化学治疗	多发性骨髓瘤;睡眠障碍;特发性(原发性)高血压;2型糖尿病;窦性心动过缓;慢性乙型病毒性肝炎;陈旧性肺结核;肺气肿;腰椎压缩性骨折;椎间盘变性;下肢动脉粥样硬化	好转	林颖	林颖	方玮玥	静脉注射化疗药物
2408	L215血液肿瘤科	2025-06-19	2025-06-22	3662461	金伯清	1	70Y	粒细胞缺乏	高血压;葡萄糖耐量试验异常;脂肪肝;胆囊结石;胆囊腺肌症;前列腺增生;颈动脉硬化;下肢动脉粥样硬化;肋骨骨折	未愈	何牧卿	孙妮	孙妮
2409	L215血液肿瘤科	2025-06-28	2025-06-28	3665295	斯建国	1	63Y	为肿瘤化学治疗疗程	嗜酸性肉芽肿;高尿酸血症;高脂血症;肋骨骨折;肺肿物;下肢动脉粥样硬化;后天性肾囊肿;Ⅰ度房室传导阻滞	好转	林颖	林颖	杨向绸	静脉注射化疗药物
2410	N11妇科	2025-02-03	2025-02-08	3603626	黄喜妹	2	34Y	中期人工流产	孕14周;骨折术后;轻度贫血	其他	段萍	梅洁	周青峰	终止妊娠刮宫术
[truncated: 6,903 more rows]
