# Supplementary material for: Variable Rate of D-dimer Predicts Venous Thromboembolism in Postoperative Fracture Patients: A Single-Center Retrospective Cohort Study
Source: Research Square preprint supplement (doi:10.21203/rs.3.rs-7878480/v1), 2025-12-09
Supplement: Supplementary file 12 [file f6481fd68641cd6a3ac3e0b9.xlsx]

## Sheet: Sheet1
序号	出院科室	入院日期	出院日期	病案号	病人	性别	年龄	主诊断	非主诊断	转归	主任	主治	住院	手术
					姓名					情况	医师	医师	医师	名称
1	A03儿童康复	2023-05-29	2023-06-17	3379823	龚子芮	男	3Y	偏瘫	创伤性脑梗塞;额骨骨折;脑白质病	好转	汤行录	涂丰霞	黄婷婷2
2	A03儿童康复	2023-05-29	2023-06-20	3381360	郑祖翔	男	7Y	运动障碍	弥漫性轴索损伤;言语障碍;念珠菌性口炎;视神经损伤;颅骨骨折;眶骨骨折	好转	汤行录	涂丰霞	黄婷婷2
3	A03儿童康复	2023-06-24	2023-07-10	3389950	林德恒	男	3Y	运动障碍	局灶性大脑挫伤伴出血;创伤性蛛网膜下腔出血;额骨骨折;肺炎;枕骨骨折;胸椎压缩性骨折;肝挫伤;顶骨骨折;胸部脊髓水肿	好转	陈翔	刘婵	伍玉丹
4	A03儿童康复	2023-07-16	2023-07-31	3399564	龚子芮	男	3Y	偏瘫	头部外伤;额骨骨折;创伤性脑梗塞;脑白质病	好转	汤行录	涂丰霞	黄婷婷2
5	A03儿童康复	2023-07-30	2023-08-19	3408247	胡凤展	男	5Y	运动障碍	脑挫伤;创伤性硬脑膜外出血;额骨和顶骨骨折;颞骨骨折;胸椎横突骨折;蛛网膜囊肿;言语障碍;生长发育迟缓	好转	陈翔	刘婵	伍玉丹
6	A03儿童康复	2023-07-23	2023-08-21	3408995	陈伊宁	女	3Y	脊髓损伤	第二颈椎骨折;寰枢椎脱位;手术后恢复期;急性上呼吸道感染	好转	汤行录	陈珊	黄婷婷2
7	A03儿童康复	2023-07-11	2023-08-22	3409513	邹梓宣	女	3Y	股骨干骨折	创伤性硬膜下出血;慢性颊粘膜下炎;运动障碍;昏迷;肺炎;眼睑挫伤;多处挫伤;视神经损伤;脑挫伤;眼球和眶组织挫伤;颅骨多发性骨折;头皮血肿;肺挫伤	治愈	陈翔	刘婵	伍玉丹	胫骨骨折切开复位钢板内固定术
8	A03儿童康复	2023-08-08	2023-08-23	3409957	林德恒	男	3Y	运动障碍	胸部脊髓水肿;胸椎压缩性骨折;构音困难和构音不全;急性上呼吸道感染;脑出血恢复期;颅骨多发性骨折	好转	陈翔	刘婵	伍玉丹
9	A03儿童康复	2023-08-08	2023-08-26	3411086	蔡欣怡	女	3Y	运动障碍	言语障碍;颅骨和面骨骨折后遗症;颅内损伤后遗症;胸腔积液	好转	陈翔	刘婵	伍玉丹
10	A03儿童康复	2023-07-23	2023-09-12	3418680	卢孙秉政	男	3Y	股骨干骨折	多处挫伤;骶骨骨折;弥散性大脑损伤伴出血;耻骨骨折;肝挫伤;肺挫伤;药物过敏反应;急性上呼吸道感染;肾结石;窦性心律失常;运动障碍;昏迷	治愈	汤行录	陈珊	伍玉丹	股骨骨折闭合复位髓内针内固定术
11	A03儿童康复	2023-09-23	2023-09-30	3426098	陈伊宁	女	4Y	运动障碍	颈部脊髓功能损伤;第二颈椎骨折;颈椎脱位;急性胃炎;物理治疗	好转	汤行录	陈珊	伍玉丹	物理疗法;生物反馈治疗;作业疗法
12	A03儿童康复	2023-09-20	2023-09-30	3426101	陈壕	男	6Y	运动障碍	言语障碍;脑挫伤;眶骨骨折;上颌窦骨折;额窦骨折;上颌窦囊肿;乳突炎;物理治疗	好转	汤行录	陈珊	伍玉丹	生物反馈治疗;物理疗法;作业疗法
13	A03儿童康复	2023-09-12	2023-09-30	3426320	卢孙秉政	男	3Y	运动障碍	肾结石;荨麻疹;物理治疗;弥散性大脑损伤伴出血;股骨干骨折;骶骨骨折;窦性心律失常	好转	汤行录	陈珊	伍玉丹	作业疗法;物理疗法
14	A03儿童康复	2023-10-08	2023-10-22	3434701	陈壕	男	6Y	运动障碍	上颌骨骨折;额窦骨折;上颌窦囊肿;乳突炎;言语障碍;脑挫伤;眶骨骨折	好转	汤行录	陈珊	伍玉丹	生物反馈治疗;作业疗法;物理疗法
15	A03儿童康复	2023-10-08	2023-10-22	3434706	陈伊宁	女	4Y	脊髓损伤	枢椎齿状突骨折;寰枕关节脱位;手术后恢复期	好转	汤行录	陈珊	伍玉丹	生物反馈治疗;作业疗法;物理疗法
16	A03儿童康复	2023-10-08	2023-10-31	3438989	卢孙秉政	男	3Y	运动障碍	骨折治疗后恢复期;髂骨骨折;骶骨骨折;窦性心律失常;肾结石;急性上呼吸道感染;言语障碍;弥散性大脑损伤伴出血	好转	汤行录	陈珊	伍玉丹	作业疗法;物理疗法;生物反馈治疗
17	A03儿童康复	2023-10-30	2023-11-13	3444429	黄梓涵	女	3Y	运动障碍	颅内损伤;蛛网膜下出血;胸椎压缩性骨折;肌腱和肌肉损伤;骨和关节软骨良性肿瘤;急性支气管炎	好转	汤行录	刘婵	伍玉丹	物理疗法;作业疗法;生物反馈治疗;高压给氧
18	A03儿童康复	2023-11-05	2023-11-21	3448017	林德恒	男	3Y	运动障碍	脑桥出血;蛛网膜下出血;颅骨骨折;胸椎压缩性骨折;构音困难和构音不全;急性上呼吸道感染;腹痛	好转	陈翔	涂丰霞	赵芸	作业疗法;生物反馈治疗;语言障碍训练;物理疗法
19	A03儿童康复	2023-11-06	2023-11-26	3450320	欧阳皓希	男	1Y	运动障碍	脑挫伤;硬膜外血肿;硬脑膜下积液;颅骨骨折;颈椎脱位;颈部脊髓损伤;癫痫;肺炎;胃肠功能紊乱	好转	汤行录	刘婵	伍玉丹	物理疗法;作业疗法;语言障碍训练;高压给氧
20	A03儿童康复	2023-11-08	2023-12-05	3454131	陈伊宁	女	4Y	颈部脊髓损伤	第二颈椎骨折;颈椎脱位;手术后恢复期;急性上呼吸道感染	好转	陈翔	涂丰霞	赵芸	生物反馈治疗;物理疗法;作业疗法
21	A03儿童康复	2023-11-19	2023-12-09	3455928	陈柏轩	男	4M	颅内出血(非创伤性)	维生素K缺乏病;癫痫;脑血管畸形;房间隔缺损;颞骨骨折;顶骨骨折;泪道阻塞;急性毛细支气管炎	好转	陈翔	陈珊	庞琼怡	物理疗法;作业疗法;运动训练
22	A03儿童康复	2023-12-10	2023-12-17	3459234	卢孙秉政	男	3Y	运动障碍	言语障碍;弥漫性轴索损伤;慢性硬膜下血肿;交通性脑积水;股骨干骨折;窦性心律失常;肾结石;急性支气管炎	好转	陈翔	陈珊	庞琼怡	运动训练;语言治疗;作业疗法;物理疗法;蜡疗
23	A03儿童康复	2023-12-03	2023-12-31	3465647	陈祖鑫	男	6Y	运动障碍	脑挫伤;创伤性蛛网膜下出血;颞骨骨折;头皮血肿;眶骨骨折;颧弓骨折;腹腔积液;胆囊管结石;肺部感染;粒细胞缺乏	好转	陈翔	陈珊	庞琼怡	物理疗法;作业疗法;运动训练
24	A03康复	2023-01-11	2023-01-16	3319926	李步汐	女	6M	运动障碍	脑挫伤;枕骨骨折;顶骨骨折;轮状病毒肠炎	好转	汤行录	陈珊	赵凯怡
25	A03康复	2023-02-07	2023-03-19	3343915	龚子芮	男	2Y	额骨骨折	脑白质病;急性上呼吸道感染;创伤性脑梗塞	好转	汤行录	刘婵	218252
26	A03康复	2023-03-25	2023-04-10	3352595	龚子芮	男	3Y	创伤性脑梗塞	急性上呼吸道感染;额骨骨折;偏瘫;脑白质病	好转	汤行录	刘婵	218252
27	A03康复	2023-03-18	2023-04-17	3355374	白周飞	男	4Y	运动障碍	言语障碍;上颌骨骨折;结膜炎;开放性脑挫伤;颅骨骨折;眶骨骨折	好转	汤行录	刘婵	218252
28	A03康复	2023-03-27	2023-04-26	3359182	文一名	男	2Y	运动障碍	创伤性小脑出血;视觉障碍;急性上呼吸道感染;创伤性蛛网膜下腔出血;脑挫伤;颅骨骨折	好转	陈翔	涂丰霞	黄婷婷2
29	A04(儿童icu)	2023-04-22	2023-05-02	3361707	陈紫萱	女	6Y	缺氧缺血性脑病	胰腺疾患;窒息;颈椎骨折;肺挫伤;心脏停搏复苏成功;肝损伤	好转	潘国权	叶小姣	夏永强
30	A04(儿童icu)	2023-05-20	2023-05-22	3369930	陈名辉	男	5Y	脑挫伤	肝损伤;慢性失血性贫血;心脏停搏复苏成功;尿崩症;头皮血肿;肺挫伤;颅骨骨折;休克;胸腔积液;脑疝	未愈	严纯雪	卢露	卢露	气管插管去除;静脉穿刺术;胸腔闭式引流术
31	A04(儿童icu)	2023-06-01	2023-06-01	3373682	刘宇航	男	5M	创伤性蛛网膜下腔出血	头皮血肿;脑挫伤;顶骨骨折;休克	死亡	严纯雪	娄鹏程	林蓓蓓2
32	A04(儿童icu)	2023-07-16	2023-07-29	3398992	林奕廷	男	4Y	骶骨骨折	肺挫伤;肝挫伤;心脏挫伤;胸椎骨折;腰椎骨折;多处挫伤;慢性失血性贫血	好转	严纯雪	娄鹏程	陈泗虎
33	A04儿童ICU	2023-09-21	2023-09-21	3422427	陈诺	女	3Y	创伤性蛛网膜下出血	脑挫伤;颅骨骨折;心脏停搏复苏成功;锁骨骨折;肺挫伤;休克;肌腱和肌肉损伤;肺出血	未愈	潘国权	金江兵	唐震海
34	A04儿童ICU	2023-09-24	2023-10-12	3430276	郭姜悦	女	10M	创伤性蛛网膜下腔出血	脑挫伤;颅骨骨折;脑脊液鼻漏;头皮血肿;肺挫伤;慢性失血性贫血;休克;腹腔积液;尿崩症;呼吸机相关性肺炎	好转	严纯雪	卢露	卢露	呼吸机治疗[大于等于96小时]
35	A04儿童ICU	2023-10-07	2023-10-20	3433986	蔡明皓	男	5Y	重症肺炎	败血症;股骨骨折;脑白质营养不良;脐血干细胞移植状态	好转	严纯雪	娄鹏程	林蓓蓓2
36	A05儿科内分泌	2023-01-02	2023-01-08	3316529	赵倪慧	女	2Y	脓毒血症	肺炎;指骨骨折	好转	郑雯洁	叶晓华	218248
37	A05儿科内分泌	2023-01-30	2023-02-01	3327073	吴家乐	男	13Y	成骨不全	鹰嘴骨折;桡骨下端骨折;胫骨上端骨折	好转	单小鸥	卢一丽	郭书真
38	A05儿科内分泌	2023-02-19	2023-03-02	3337170	李健康	男	15Y	脓毒血症	股骨特指部位骨折;隐睾;关节积液;胆囊结石;脊髓肿瘤;腺性膀胱炎	治愈	单小鸥	卢一丽	金佳蕙	关节穿刺术
39	A05儿科内分泌	2023-03-07	2023-03-12	3341096	苏义豪	男	8Y	成骨不全	肱骨外髁骨折;后天性肘内翻	未愈	单小鸥	金佳蕙	郭书真
40	A05儿科内分泌	2023-05-18	2023-05-19	3368401	刘硕	男	14Y	幼年型强直性脊柱炎	骨质疏松;肱骨上端骨折;结核菌素试验异常反应	好转	郑雯洁	叶晓华	叶晓华
41	A05儿科内分泌	2023-06-15	2023-06-16	3379677	戴煜淑	女	9Y	青春期发育过早	手骨折	未愈	卢一丽	金佳蕙	苏海燕
42	A05儿科内分泌	2023-08-06	2023-08-08	3403330	吴家乐	男	14Y	成骨不全	病理性骨折，不可归类在他处者;骨折术后	好转	单小鸥	吴慧平	杨蒙洁
43	A05儿科内分泌	2023-08-22	2023-08-24	3410546	苏义豪	男	8Y	成骨不全	骨折术后;后天性肘内翻	好转	单小鸥	罗越	曹顺顺
44	A05儿科内分泌	2023-10-14	2023-10-15	3431835	陈星源	男	4Y	幼年型关节炎伴有全身性发病	手骨折	好转	郑雯洁	郑雯洁	上官瑶瑶	单克隆抗体治疗
45	A06(儿神)	2023-05-15	2023-05-18	3367977	陈逸航	男	6Y	枕骨骨折	头皮血肿	好转	李伟	李丰	翁翠叶	腰椎穿刺术
46	A06(儿神)	2023-06-05	2023-06-12	3377785	陈锦轩	男	4Y	病毒性脑膜炎	枕骨骨折	治愈	李伟	李丰	陈佩文	腰椎穿刺术
47	A06(儿神)	2023-07-22	2023-08-06	3402340	何知远	男	7Y	脑挫伤	急性上呼吸道感染;颅骨骨折;颅腔积气;头皮血肿;皮肤挫伤	好转	胡颖	李丰	李丰	腰椎穿刺术
48	A06(儿神)	2023-10-14	2023-10-22	3434958	胡新腾	男	8M	周围性面神经麻痹	急性毛细支气管炎;室间隔缺损;陈旧性锁骨骨折;急性上呼吸道感染	好转	叶秀云	李伟	王晓雨	腰椎穿刺术
49	A06(儿神)	2023-11-03	2023-11-12	3443919	黄温旎	女	11Y	急性上呼吸道感染	慢性鼻窦炎;眶骨骨折;手术后状态，其他特指的	治愈	林忠东	张崇晓	王博浩	腰椎穿刺术
50	A07(儿消)	2023-02-24	2023-03-15	3342304	蔡溪	男	4Y	肱骨髁间骨折	急性胆囊炎;开放性多发性损伤;尺骨桡骨远端骨折;肝损伤;脓毒血症;皮肤挫伤;肾挫伤;肺挫伤	治愈	黄开宇	闫秀梅	闫秀梅	桡骨骨折闭合性复位术;肱骨骨折闭合复位钢针内固定术;尺骨骨折闭合性复位术
51	A07(儿消)	2023-03-27	2023-03-30	3348686	丁昱皓	男	5Y	特指急性胃炎	胫骨骨折	治愈	徐彰	朱小舟	吴蓓蓓3	胃镜检查
52	A07(儿消)	2023-04-10	2023-04-13	L0183225	金宇达	男	5Y	特指急性胃炎	尺骨桡骨远端骨折;急性上呼吸道感染;肠功能紊乱	治愈	黄开宇	闫秀梅	闫秀梅
53	A07(儿消)	2023-04-20	2023-05-17	3367559	林元灿	男	3Y	创伤性蛛网膜下腔出血	头皮血肿;肺挫伤;颈部脊髓损伤;创伤性气胸;肋骨骨折;急性上呼吸道感染;多处皮肤浅表擦伤;颈椎扭伤和劳损;胰腺损伤;肝挫伤;胸椎扭伤和劳损;心脏挫伤;胸椎骨折T1/T2;胆囊结石	好转	潘彤彤	潘彤彤	方玲娟
54	A07(儿消)	2023-10-08	2023-10-14	3431113	方侨	男	1Y	腹泻	脱水;营养不良;颅骨骨折;创伤性硬膜下出血;创伤性硬脑膜外出血	治愈	陈桧平	卢华君	卢华君
55	A07(儿消)	2023-11-16	2023-11-19	3447126	吴承骏	男	13Y	下消化道出血	慢性胃炎;便秘;桡骨骨折;幽门螺旋杆菌感染	治愈	卢华君	卢华君	卢华君	结肠镜检查;胃镜检查
56	A09(儿肾)	2023-01-29	2023-02-08	3329241	葛希铭	男	4Y	脓毒血症	泌尿道感染;特指指骨骨折;低钾血症	治愈	卢立肖	王德选	王德选
57	A09(儿肾)	2023-02-18	2023-02-19	3332620	葛希铭	男	4Y	泌尿道感染	膀胱输尿管反流;指骨骨折	好转	杨青	陈敏广	陈敏广	逆行输尿管造影;导尿术
58	A09(儿肾)	2023-03-13	2023-03-25	3346322	李健康	男	15Y	脓毒血症	隐睾;股骨髁上骨折;脊髓肿瘤;泌尿道感染;神经源性膀胱	治愈	庄捷秋	庄捷秋	林洪洲	留置导尿管的置入术;逆行输尿管造影
59	A09(儿肾)	2023-03-30	2023-04-13	3354123	李健康	男	15Y	脓毒血症	神经源性膀胱;隐睾;股骨髁上骨折;泌尿道感染;中耳炎;特指手术后状态	治愈	杨青	陈敏广	陈敏广
60	A09(儿肾)	2023-07-19	2023-07-23	3395968	刘友鑫	男	10Y	体位性蛋白尿	肘关节骨折;桡骨颈骨折	未愈	庄捷秋	庄捷秋	林洪洲
61	A09(儿肾)	2023-11-05	2023-11-26	3450042	王志婧	女	12Y	过敏性紫癜性肾炎	维生素D缺乏病;急性上呼吸道感染;便秘;距骨骨折	好转	庄捷秋	余灵芳	余灵芳	肾穿刺活组织检查
62	A10(儿血)	2023-04-13	2023-04-21	3357109	刘承熙	男	1Y	后天性纯红细胞再生障碍性贫血	创伤性硬膜下出血;中央型房间隔缺损(卵圆孔型);急性上呼吸道感染;颅骨骨折;急性支气管炎	未愈	李原	黄珍	胡玲珑	骨髓穿刺术
63	A10(儿血)	2023-09-04	2023-09-08	3416994	季峻辉	男	4Y	急性白血病	股骨骨折	未愈	王菊香	王菊香	黄婷婷3	骨髓穿刺术
64	A10(儿血)	2023-09-18	2023-09-22	3422459	苗侨恺	男	10M	特发性血小板减少性紫癜	顶骨骨折;头皮血肿;急性上呼吸道感染	好转	王菊香	王菊香	黄婷婷3	骨髓穿刺术
65	B03儿科普内与中西医	2022-12-30	2023-01-04	3315270	黄子恒	男	8Y	眶骨骨折	头部外伤;慢性鼻炎;肺炎	好转	黄爱蓉	黄爱蓉	吴洋洋
66	B04儿科呼吸	2023-06-30	2023-07-06	3388341	吴正武	男	10Y	腺病毒肺炎	支气管扩张（症）;EB病毒感染;骨折术后;肺门淋巴结肿大	治愈	郑仰明	余刚	孙王明	支气管镜下支气管活检
67	B04儿科呼吸	2023-08-01	2023-08-06	3402312	吴正武	男	11Y	肺炎	支气管扩张(症);联合免疫缺陷，其他的;骨折术后	好转	张海邻	余刚	孙王明
68	B04儿科呼吸	2023-08-24	2023-09-01	3413979	吴正武	男	11Y	支气管扩张伴感染	轻度营养不良;EB病毒感染;肾炎;联合免疫缺陷，其他的;慢性鼻窦炎;肺门淋巴结肿大;骨折术后	好转	张海邻	余刚	孙王明
69	B06(儿传)	2023-02-21	2023-02-28	3336236	王志恒	男	2Y	顶骨骨折	枕骨骨折;颅腔积气;头部多处浅表损伤;特指流感病毒流行性感冒伴特指呼吸道表现	好转	吴伟军	朱烈烈	朱烈烈
70	C03眼科口腔	2022-12-27	2023-01-02	3314559	张林杨	男	59Y	跖骨骨折	前列腺结石	治愈	赵友明	余贤斌	柯陈荣	跖骨骨折切开复位钢针内固定术
71	C03眼科口腔	2022-12-24	2023-01-02	3314563	董其会	男	41Y	眼球挫伤	视神经损伤;视网膜震荡;眼睑裂伤;眶骨骨折;翼状胬肉;脑挫伤;高脂血症	好转	郑海华	董志章	苟苏庆
72	C03眼科口腔	2022-12-24	2023-01-04	3315231	王艳	女	29Y	创伤性前房积血	眶骨骨折;眼球破裂;前房积血;牵引性视网膜脱离;玻璃体损伤;外伤性白内障;黄斑裂孔;脉络膜出血	好转	冯旺强	董志章	林达	前房成形术;前房冲洗术;玻璃体硅油置入术,用于视网膜再附着;后入路玻璃体切割术;白内障囊外摘除术
73	C03眼科口腔	2022-12-27	2023-01-05	3315759	郑士广	男	40Y	下颌骨骨折	多发性肋骨骨折;髂骨骨折;尺骨骨折	治愈	聂鑫	肖进	汪池	皮肤和皮下组织非切除性清创;下颌骨钛板置入术;下颌骨骨折切开复位内固定术
74	C03眼科口腔	2022-12-07	2023-01-05	3315790	何光隆	男	43Y	下颌骨骨折	创伤性蛛网膜下腔出血	治愈	聂鑫	聂鑫	718416	颅骨切除减压术;下颌骨骨折闭合复位术
75	C03眼科口腔	2022-12-30	2023-01-08	3316632	吴承旭	男	7Y	下颌骨骨折	特指原因未进行操作;下颌骨骨折;颧骨骨折	好转	聂鑫	肖进	718416
76	C03眼科口腔	2023-01-07	2023-01-09	3317157	陈熙瑶	女	5Y	下颌骨骨折	特指原因未进行操作	未愈	聂鑫	肖进	718416
77	C03眼科口腔	2023-01-01	2023-01-10	3317519	赵冬华	女	77Y	眼球破裂	眼睑裂伤;眶骨骨折;颧骨骨折;上颌骨骨折;玻璃体切除硅油充填状态;具有眼内晶状体	治愈	韩晓辉	杨顺海	林达	巩膜探查术;眼球破裂修补术
78	C03眼科口腔	2023-01-07	2023-01-11	3317925	郭乾	男	17Y	取除骨折内固定装置		其他	韩晓辉	杨顺海	林达	面骨内固定物取出术
79	C03眼科口腔	2023-01-07	2023-01-11	3317931	张鹏鹏	男	15Y	取除骨折内固定装置		其他	韩晓辉	杨顺海	林达	面骨内固定物取出术
80	C03眼科口腔	2022-12-30	2023-01-11	3317959	郑亦佐	男	14Y	牙槽骨骨折	面部软组织挫伤;唇裂伤;牙脱位	治愈	聂鑫	肖进	716452	牙槽骨折切开复位伴牙齿固定术;皮肤和皮下组织非切除性清创
81	C03眼科口腔	2023-01-09	2023-01-14	3318866	汤长考	男	47Y	取除骨折内固定装置		其他	韩晓辉	杨顺海	林达	面骨内固定物取出术
82	C03眼科口腔	2023-01-10	2023-01-14	3318890	金传亿	男	34Y	取除骨折内固定装置	脂肪肝;副脾;后天性肾囊肿	其他	石成弟	胡炜	胡炜	踝关节内固定物取出术
83	C03眼科口腔	2023-01-10	2023-01-14	3318895	王义中	男	46Y	取除骨折内固定装置	脂肪肝	其他	石成弟	胡炜	胡炜	肱骨内固定物取出术
84	C03眼科口腔	2023-01-05	2023-01-14	3319243	何广朝	男	21Y	眶骨骨折	上颌骨骨折;额骨骨折;鼻骨骨折;颧骨骨折;头皮挫伤;眼眶挫伤;创伤性牙齿脱落;耳损伤;肺挫伤	治愈	韩晓辉	韩晓辉	林达	眶骨骨折闭合复位术
85	C03眼科口腔	2023-01-09	2023-01-16	3320022	马折芳	女	30Y	下颌骨骨折		治愈	聂鑫	肖进	716813	颅颌牵引;筋膜成形术;髁突骨折切开复位内固定术
86	C03眼科口腔	2023-01-07	2023-01-18	3320997	曾海鹏	男	15Y	下颌骨骨折		治愈	聂鑫	肖进	汪池	颅颌牵引;筋膜成形术;髁突骨折切开复位内固定术
87	C03眼科口腔	2023-01-14	2023-01-18	3321081	章长和	女	23Y	取除骨折内固定装置		其他	陈华	孙辽军	王特	踝关节内固定物取出术
88	C03眼科口腔	2023-01-12	2023-01-19	3321312	谢君卿	男	56Y	眶骨骨折	颧骨骨折;面部软组织挫伤;痛风;高血压病	治愈	郑海华	苟苏庆	林达	眶骨骨折切开复位术;颧骨骨折切开复位内固定术
89	C03眼科口腔	2023-01-13	2023-01-19	3321472	王通赛	女	33Y	锁骨骨折	颧骨骨折;肾结石;眶骨骨折;卵巢囊肿	治愈	聂鑫	肖进	716804	锁骨骨折切开复位钢板内固定术
90	C03眼科口腔	2022-12-31	2023-01-23	3323006	王玲	女	48Y	眶骨骨折	上颌骨骨折;颧骨骨折;下颌骨骨折;鼻骨骨折;头皮血肿;创伤性牙折断;肺挫伤;多发性肋骨骨折;多处挫伤	治愈	郑海华	韩晓辉	林达	下颌骨骨折切开复位内固定术;上颌骨骨折切开复位固定术;颧骨骨折切开复位内固定术;眶骨骨折切开复位术
91	C03眼科口腔	2023-01-18	2023-01-24	3323580	黄玉仁	男	47Y	创伤性晶状体脱位	继发性青光眼;泪小管裂伤;眼睑裂伤;视网膜损伤;创伤性脉络膜脱离;眼球挫伤;眶骨骨折;外伤性白内障	治愈	郑穗联	夏哲人	陈婕灵	眼睑裂伤缝合术;鼻泪管插管术;泪小管吻合术;前入路玻璃体切割术;晶状体囊内摘除术
92	C03眼科口腔	2023-01-17	2023-01-25	3323929	舒琴	女	24Y	取除骨折内固定装置		其他	聂鑫	肖进	716452	面骨内固定物取出术
93	C03眼科口腔	2023-01-21	2023-01-25	3324018	洪永恒	男	18Y	取除骨折内固定装置		其他	韩晓辉	韩晓辉	林达	面骨内固定物取出术
94	C03眼科口腔	2022-12-30	2023-01-26	3324283	张乐	男	30Y	创伤性蛛网膜下腔出血	颅腔积气;颞骨骨折;顶骨骨折;额骨骨折;肺挫伤;肺部感染;创伤性血气胸;创伤性皮下气肿;创伤性硬膜下出血;视神经损伤;创伤性硬膜外出血;脑挫伤;蛛网膜下腔出血;股骨骨折;创伤性休克;眶骨骨折;肾损伤;颅底骨折;上颌骨骨折;颧骨骨折	好转	郑海华	韩晓辉	骆伊丽	面骨合成物置入术;视神经减压术;鼻内镜下眶减压术;上颌骨骨折切开复位固定术;眶骨骨折切开复位术;肩胛骨骨折切开复位钢板内固定术;股骨骨折切开复位髓内针内固定术
95	C03眼科口腔	2023-01-05	2023-01-28	3324988	李刘杰	男	29Y	眶骨骨折	髂骨骨折;肱骨外髁骨折;尺骨上端骨折;肘关节脱位	治愈	韩晓辉	杨顺海	林达	髂骨骨折切开复位钢板内固定术;眶骨骨折闭合复位术
96	C03眼科口腔	2023-01-17	2023-01-28	3325035	郑玉姬	女	48Y	眶骨骨折	颧骨骨折;上颌骨骨折;鼻骨骨折;上睑下垂	治愈	韩晓辉	董志章	林达	颧骨骨折切开复位术;上颌骨骨折切开复位固定术;眶骨骨折切开复位术
97	C03眼科口腔	2023-01-22	2023-01-28	3325181	韩丽	女	49Y	眶骨骨折	眼睑裂伤	治愈	郑海华	韩晓辉	林达	眶骨骨折闭合复位术
98	C03眼科口腔	2023-01-04	2023-01-28	3325227	何冬文	男	37Y	眶骨骨折	陈旧性肺结核;前列腺结石;肾结石;多处挫伤;尺骨桡骨远端骨折;颧骨骨折;上颌骨骨折;视神经损伤;骰骨骨折;跖骨骨折;腕关节脱位;颅腔积气	治愈	韩晓辉	韩晓辉	林达	上颌骨骨折切开复位固定术;颧骨骨折切开复位内固定术;眶骨骨折切开复位术;桡骨骨折切开复位钢板内固定术;腕关节脱位切开复位内固定术
99	C03眼科口腔	2023-01-23	2023-01-29	3325531	陈玉富	男	62Y	下颌骨骨折		治愈	聂鑫	肖进	718416	下颌骨骨折切开复位内固定术
100	C03眼科口腔	2023-01-27	2023-01-29	3325565	吴昌灶	男	55Y	泪小管裂伤	眼睑裂伤;结膜裂伤;眶骨骨折;上颌骨骨折	治愈	郑海华	林达	林达	外眦成形术;内眦成形术;鼻泪管插管术;鼻泪管探通术;泪小管吻合术
101	C03眼科口腔	2023-01-23	2023-01-29	3325632	万寿云	男	60Y	眶骨骨折	上睑下垂;上颌骨骨折;颧骨骨折	治愈	韩晓辉	董志章	林达	眶骨骨折闭合复位术
102	C03眼科口腔	2023-01-27	2023-01-30	3326010	郑建平	男	49Y	泪小管裂伤	眼睑裂伤;鼻骨骨折;上颌骨骨折	治愈	韩晓辉	林达	林达	鼻泪管探通术;泪小管吻合术;鼻泪管插管术;外眦成形术;内眦成形术
103	C03眼科口腔	2023-01-25	2023-01-30	3326095	黄国兴	男	51Y	取除骨折内固定装置		其他	聂鑫	肖进	718416	面骨内固定物取出术
104	C03眼科口腔	2023-01-25	2023-01-30	3326126	刘爱柳	女	54Y	取除骨折内固定装置		其他	聂鑫	肖进	718416	面骨内固定物取出术
105	C03眼科口腔	2023-01-21	2023-01-31	3326416	张利德	男	62Y	颧骨骨折	上颌骨骨折;眶骨骨折;开放性腮腺管断裂;开放性面部损伤	治愈	聂鑫	肖进	汪池	唾液腺管修补术;眶骨骨折切开复位术;颧骨骨折切开复位内固定术;上颌骨骨折切开复位固定术
106	C03眼科口腔	2023-01-25	2023-02-01	3326965	万英柳	女	66Y	眶骨骨折	上睑下垂;翼状胬肉;上颌窦筛窦炎;老年性脑萎缩;高血压病;2型糖尿病;筛骨良性肿瘤;眼球挫伤;结膜裂伤	治愈	冯旺强	董志章	林达	眶骨骨折切开复位术
107	C03眼科口腔	2023-01-14	2023-02-01	3327012	邵秀莲	女	73Y	眶骨骨折	多发性肋骨骨折;桡骨下端骨折;多处挫伤;肺结节;高血压病;双眼白内障;胆囊结石;肾结石;上颌骨骨折;颧骨骨折	治愈	韩晓辉	杨顺海	骆伊丽	眶骨骨折切开复位术;颧骨骨折切开复位内固定术;上颌骨骨折切开复位固定术
108	C03眼科口腔	2023-01-17	2023-02-01	3327176	程林峰	男	32Y	上颌骨骨折	下颌骨骨折	治愈	聂鑫	聂鑫	716452	上颌骨骨折切开复位固定术;下颌骨骨折切开复位内固定术
109	C03眼科口腔	2023-01-28	2023-02-01	3327329	申良	男	47Y	眶骨骨折	颅底骨折;颧骨骨折;面部软组织挫伤;创伤性皮下气肿;肺钙化;颈椎退行性病变;颈椎椎管狭窄;眼损伤	治愈	韩晓辉	董志章	林达	眶骨骨折切开复位术;颧骨骨折切开复位内固定术
110	C03眼科口腔	2023-01-30	2023-02-02	3327736	吴仕法	男	41Y	眶骨骨折		治愈	冯旺强	杨顺海	林达	结膜囊成形术;眶骨骨折切开复位术
111	C03眼科口腔	2023-01-28	2023-02-04	3328712	金苏琪	男	31Y	下颌骨骨折	创伤性牙折断	治愈	聂鑫	聂鑫	716804	拔牙术;下颌骨骨折切开复位内固定术
112	C03眼科口腔	2023-01-29	2023-02-04	3328741	庄星基	男	64Y	上颌骨骨折	下颌骨骨折;颧骨骨折;心房颤动	治愈	聂鑫	聂鑫	718416	颧骨骨折切开复位内固定术;上颌骨骨折切开复位固定术;皮肤和皮下组织非切除性清创;下颌骨骨折切开复位内固定术
113	C03眼科口腔	2023-01-31	2023-02-11	3329808	郑德明	男	60Y	下颌骨骨折	颞下颌关节脱位;上颌骨囊肿	治愈	聂鑫	肖进	500765	髁突骨折切开复位内固定术
114	C03眼科口腔	2023-01-28	2023-02-11	3329829	王新刚	男	40Y	颧骨骨折	上颌骨骨折	治愈	聂鑫	肖进	716452	上颌骨骨折切开复位固定术;颧骨骨折切开复位内固定术
115	C03眼科口腔	2023-02-11	2023-02-13	3330399	省文强	男	23Y	鼻骨骨折		治愈	刘学军	张初琴	张初琴	鼻骨骨折闭合复位术
116	C03眼科口腔	2023-01-31	2023-02-14	3330927	张利德	男	62Y	眶骨骨折	颧骨骨折;上颌骨骨折;眼睑挫伤;泪小管裂伤	好转	郑海华	韩晓辉	林达	上颌骨骨折切开复位固定术;颧骨骨折切开复位内固定术;眶骨骨折切开复位术
117	C03眼科口腔	2023-02-11	2023-02-15	3331207	吴也娥	女	35Y	眶骨骨折	高度近视	治愈	韩晓辉	杨顺海	林达	眶骨骨折切开复位术
118	C03眼科口腔	2023-02-11	2023-02-15	3331283	濮水婷	女	51Y	眶骨骨折	头部外伤	好转	郑海华	韩晓辉	林达	眶骨骨折切开复位术
119	C03眼科口腔	2023-02-11	2023-02-16	3331678	王光明	男	61Y	取除骨折内固定装置	双眼白内障;冠状动脉粥样硬化;胆囊息肉;后天性肾囊肿	其他	郑海华	韩晓辉	林达	面骨内固定物取出术
120	C03眼科口腔	2023-02-11	2023-02-18	3332310	计超豪	男	36Y	眶骨骨折	颧骨骨折;上颌骨骨折	治愈	韩晓辉	冯旺强	林达	上颌骨骨折切开复位固定术;颧骨骨折切开复位内固定术;眶骨骨折切开复位术
121	C03眼科口腔	2023-01-28	2023-02-22	3333886	陈继暖	男	60Y	视网膜损伤	踝关节扭伤;多处挫伤;具有眼内晶状体;黄斑裂孔;单眼白内障（左）;头皮血肿;上颌骨骨折;颈部脊髓损伤;寰枢椎半脱位;外踝骨折	治愈	冯旺强	董志章	林达	视网膜剥离术;后入路玻璃体切割术;黄斑裂孔修复术;玻璃体腔气液交换术;视网膜激光凝固术
122	C03眼科口腔	2023-02-20	2023-02-25	3334960	章定龙	男	51Y	眶骨骨折	肺结节;脂肪肝	治愈	郑海华	韩晓辉	林达	眶骨骨折切开复位术
123	C03眼科口腔	2023-02-12	2023-02-25	3334973	李迪晨	男	7Y	下颌骨骨折		治愈	聂鑫	聂鑫	716452	下颌骨骨折切开复位内固定术
124	C03眼科口腔	2023-02-17	2023-03-04	3337656	何昭霞	女	37Y	下颌骨骨折		好转	聂鑫	聂鑫	徐兴侨	下颌骨骨折切开复位内固定术
125	C03眼科口腔	2023-02-25	2023-03-05	3338216	王儒民	男	3Y	取除骨折内固定装置		其他	聂鑫	聂鑫	黄武	下颌骨内固定物取出术
126	C03眼科口腔	2023-03-01	2023-03-08	3339645	陈罗灿	男	50Y	取除骨折内固定装置		其他	聂鑫	徐兴侨	黄武	上颌骨内固定装置取出术;下颌骨内固定装置取出术
127	C03眼科口腔	2023-02-24	2023-03-08	3339656	廖仕浩	男	17Y	眶骨骨折	肾结石;头部外伤;面部裂伤;上颌骨骨折	治愈	韩晓辉	杨顺海	骆伊丽	眶骨骨折切开复位术
128	C03眼科口腔	2023-02-24	2023-03-11	3340483	李葵秀	女	46Y	眶骨骨折		治愈	郑海华	韩晓辉	林达	眶骨骨折切开复位内固定术
129	C03眼科口腔	2023-03-07	2023-03-11	3340842	陈永南	男	58Y	腰椎骨折	后天性肾囊肿;肾积水伴肾结石;下肢动脉粥样硬化;腰椎退行性病变;骨质疏松;肝钙化灶	好转	赵友明	赵友明	柯陈荣
130	C03眼科口腔	2023-03-01	2023-03-14	3342051	林宝翻	男	45Y	下颌骨骨折	创伤性牙破损	治愈	聂鑫	徐兴侨	718423	下颌骨骨折切开复位内固定术;髁突摘除术
131	C03眼科口腔	2023-03-12	2023-03-15	3342605	温兴海	男	54Y	角膜穿通伤	高血压病;眶骨骨折;单眼白内障（左）	治愈	冯旺强	董志章	林达	角膜裂伤缝合术;前房成形术
132	C03眼科口腔	2023-03-12	2023-03-18	3343361	傅胜华	男	47Y	眶骨骨折	高血压病	治愈	韩晓辉	董志章	林达	眶骨骨折切开复位内固定术
133	C03眼科口腔	2023-02-26	2023-03-18	3343411	李五	男	25Y	下颌骨骨折	胫骨干骨折伴腓骨骨折;面部裂伤	治愈	聂鑫	徐兴侨	718423	皮肤伤口切除性清创术;皮肤缝合术;皮肤和皮下组织异物切开取出术;胫骨骨折闭合复位髓内针内固定术;下颌骨骨折切开复位内固定术
134	C03眼科口腔	2023-03-11	2023-03-18	3343416	夏乾河	男	51Y	视神经损伤	眶骨骨折	好转	韩晓辉	董志章	林达
135	C03眼科口腔	2023-03-13	2023-03-18	3343768	赵雪花	女	51Y	取除骨折内固定装置	腰椎退行性病变;脂肪肝	其他	赵友明	赵友明	柯陈荣	指骨内固定装置去除术;锁骨内固定装置去除术
136	C03眼科口腔	2023-03-11	2023-03-19	3344085	周月雄	男	44Y	眶骨骨折	义眼;2型糖尿病;慢性泪囊炎	治愈	韩晓辉	杨顺海	林达	眶骨骨折切开复位内固定术;鼻泪管插管术;鼻泪管探通术
137	C03眼科口腔	2023-03-16	2023-03-21	3345037	陈熙瑶	女	5Y	取除骨折内固定装置		其他	聂鑫	徐兴侨	718423	下颌骨内固定装置取出术
138	C03眼科口腔	2023-03-18	2023-03-22	3345550	程爱香	女	65Y	腰椎骨折L1	腰椎间盘突出;高血压病;骨质疏松;脂肪肝;下肢静脉血栓形成	治愈	林焱	田乃锋	田乃锋	腰椎骨折球囊扩张成形术;经皮椎骨成形术
139	C03眼科口腔	2023-03-18	2023-03-23	3345785	吴云献	女	77Y	双眼白内障	双踝骨折;近视;高眼压症;踝关节脱位	治愈	郑穗联	夏哲人	郭燕	白内障摘除伴人工晶体一期置入术;白内障超声乳化抽吸术
140	C03眼科口腔	2023-03-19	2023-03-25	3346327	潘良好	男	25Y	下颌骨骨折		未愈	聂鑫	徐兴侨	718423
141	C03眼科口腔	2023-03-20	2023-03-25	3346558	揭茂福	男	49Y	眶骨骨折	上睑下垂	治愈	韩晓辉	杨顺海	林达	眶骨骨折切开复位内固定术
142	C03眼科口腔	2023-03-20	2023-03-27	3347314	余瑞富	男	53Y	颧骨骨折		治愈	聂鑫	徐兴侨	黄武	髂骨骨折切开复位钢板内固定术
143	C03眼科口腔	2023-03-19	2023-03-28	3347595	郭百林	男	54Y	泪小管裂伤	老年性脑萎缩;眼睑裂伤;眶骨骨折	治愈	冯旺强	杨顺海	林达	泪小管吻合术;鼻泪管探通术;内眦成形术;鼻泪管插管术
144	C03眼科口腔	2023-03-15	2023-03-28	3347611	章厚瑞	男	48Y	双踝骨折	肾结石;肝钙化灶;脂肪肝	治愈	陈龙	应晓洲	应晓洲	踝关节骨折切开复位螺钉内固定术
145	C03眼科口腔	2023-03-20	2023-03-28	3347777	薛约雪	女	37Y	上颌骨骨折	创伤性牙折断	治愈	聂鑫	徐兴侨	黄武	上颌骨骨折切开复位内固定术;拔牙术
146	C03眼科口腔	2023-03-12	2023-03-28	3347823	蔡仁忠	男	35Y	下颌骨骨折	创伤性牙折断;髁突骨折;跟骨骨折;股骨骨折	治愈	聂鑫	聂鑫	徐兴侨	跟骨骨折切开复位钢板内固定术;跟骨植骨术;皮肤和皮下组织非切除性清创;皮肤缝合术;股骨骨折切开复位髓内针内固定术;股骨人工骨植骨术;下颌骨骨折切开复位内固定术
147	C03眼科口腔	2023-03-11	2023-04-02	3349819	苏苗强	男	25Y	创伤性肝破裂	肾结石;额骨骨折;锁骨骨折;头皮挫伤	治愈	聂鑫	徐兴侨	黄武	肝破裂修补术;骨空隙骨水泥填充术;腹腔冲洗检查;下颌骨骨折切开复位内固定术;锁骨骨折切开复位钢板内固定术
148	C03眼科口腔	2023-04-02	2023-04-03	3350158	季以诚	男	8Y	下颌骨骨折		未愈	聂鑫	徐兴侨	黄武
149	C03眼科口腔	2023-04-01	2023-04-05	3350851	张利德	男	63Y	眶骨骨折	双眼白内障	治愈	韩晓辉	杨顺海	林达	眶骨骨折切开复位内固定术;游离皮瓣移植眼睑重建术
150	C03眼科口腔	2023-03-26	2023-04-05	3350874	周云娟	女	58Y	腰椎骨折L1	原发性急性闭角型青光眼;2型糖尿病;骨质疏松;双眼白内障	好转	郑穗联	夏哲人	郭燕	腰椎骨折球囊扩张成形术;经皮椎骨成形术
151	C03眼科口腔	2023-04-03	2023-04-08	3351787	陈金风	女	34Y	眶骨骨折	眼挫伤	治愈	韩晓辉	杨顺海	林达	眶骨骨折切开复位内固定术
152	C03眼科口腔	2023-03-31	2023-04-08	3351826	陈承尧	男	23Y	锁骨骨折	掌骨骨折	好转	余可和	余可和	218019	锁骨骨折切开复位钢板内固定术;锁骨人工骨植骨术
153	C03眼科口腔	2023-03-31	2023-04-09	3352435	殷为恩	男	67Y	眶骨骨折	小腿开放性损伤;颅腔积气;眼睑裂伤;腓骨骨折;鼻骨骨折;额骨骨折	好转	韩晓辉	杨顺海	林达
154	C03眼科口腔	2023-03-29	2023-04-10	3352691	陈小军	男	37Y	眶骨骨折	颧骨骨折;上颌骨骨折	好转	郑海华	林达	林达	眶骨骨折切开复位内固定术;颧骨骨折切开复位内固定术;上颌骨骨折切开复位内固定术
155	C03眼科口腔	2023-03-30	2023-04-10	3352753	张起平	男	38Y	股骨粗隆间骨折	股骨粗隆下骨折;胆囊息肉;脂肪肝	治愈	赵友明	赵友明	柯陈荣	股骨骨折闭合复位髓内针内固定术
156	C03眼科口腔	2023-04-09	2023-04-12	3353543	胡绍永	男	47Y	取除骨折内固定装置	陈旧性肋骨骨折	其他	石成弟	石成弟	218372	锁骨内固定装置去除术
157	C03眼科口腔	2023-04-09	2023-04-12	3353574	王丽华	女	51Y	取除骨折内固定装置	高血压病	其他	陈华	陈华	王特	肱骨内固定装置去除术
158	C03眼科口腔	2023-04-08	2023-04-13	3354065	连春媚	女	52Y	科雷骨折	肾结石;骨质疏松	好转	陈华	孙辽军	王特	桡骨骨折切开复位钢板内固定术
159	C03眼科口腔	2023-03-31	2023-04-15	3354727	谭孝琼	女	43Y	下颌骨骨折	桡骨下端骨折	治愈	聂鑫	聂鑫	黄武	下颌骨骨折切开复位内固定术
160	C03眼科口腔	2023-04-10	2023-04-17	3355445	章碧琴	女	56Y	腰椎骨折	骨质疏松;心功能不全;肾结石;腰椎退行性病变;胸椎退行性病变	治愈	武垚森	王胜	武垚森	经皮椎骨成形术;腰椎骨折球囊扩张成形术
161	C03眼科口腔	2023-04-08	2023-04-17	3355644	陈蓓蓓	女	30Y	双踝骨折	肝钙化灶	好转	陈华	孙辽军	王特	踝关节骨折切开复位螺钉内固定术
162	C03眼科口腔	2023-04-12	2023-04-18	3356132	代贵兰	女	52Y	跖骨骨折	骰骨骨折;距骨骨折;内踝骨折	治愈	杨雷	胡炜	218371	跖骨骨折切开复位钢针内固定术
163	C03眼科口腔	2023-04-10	2023-04-19	3356485	邵少燕	女	38Y	桡骨下端骨折		治愈	杨雷	胡炜	218371	桡骨骨折切开复位钢板内固定术;骨空隙填补物置入;关节软骨修复术
164	C03眼科口腔	2023-04-15	2023-04-20	3356873	张顺	男	22Y	取除骨折内固定装置		其他	赵友明	柯陈荣	柯陈荣	髌骨内固定装置去除术
165	C03眼科口腔	2023-04-18	2023-04-22	3357334	陈先毛	男	57Y	取除骨折内固定装置	下肢动脉粥样硬化;肝回声不均	其他	陈华	孙辽军	王特	跖骨内固定装置去除术
166	C03眼科口腔	2023-04-16	2023-04-22	3357375	谢中奖	男	28Y	锁骨骨折	脂肪肝	治愈	陈龙	应晓洲	应晓洲	锁骨骨折切开复位钢板内固定术
167	C03眼科口腔	2023-04-18	2023-04-22	3357417	周美凤	女	58Y	取除骨折内固定装置	脂肪肝	其他	黄俊武	黄俊武	218239	肱骨内固定装置去除术;皮肤瘢痕切除术
168	C03眼科口腔	2023-04-15	2023-04-22	3357576	龙翠兰	女	45Y	取除骨折内固定装置	胆囊息肉;脂肪肝	其他	赵友明	柯陈荣	柯陈荣	跟骨内固定物取出术
169	C03眼科口腔	2023-04-18	2023-04-22	3357686	黄小钗	女	52Y	取除骨折内固定装置	室性早搏;脂肪肝	其他	黄俊武	黄俊武	218239	肱骨内固定装置去除术;肱骨植骨术;皮肤瘢痕切除术
170	C03眼科口腔	2023-04-17	2023-04-23	3357869	倪子健	男	14Y	髂骨骨折		治愈	杨雷	胡炜	218371	髂骨骨折切开复位螺钉内固定术
171	C03眼科口腔	2023-04-17	2023-04-23	3357879	卢超	男	38Y	跟骨骨折	肝囊肿;脂肪肝	好转	陈龙	应晓洲	应晓洲	跟骨骨折闭合复位螺钉内固定术
172	C03眼科口腔	2023-04-15	2023-04-23	3357964	周望	男	16Y	眶骨骨折		治愈	韩晓辉	董志章	林达	眶骨骨折切开复位内固定术;筋膜缝合术
173	C03眼科口腔	2023-04-11	2023-04-23	3358053	季梦雅	女	21Y	下颌骨骨折	牙槽骨骨折;头皮血肿;肺挫伤;脑震荡;鼻骨骨折	治愈	聂鑫	徐兴侨	黄武	下颌骨骨折切开复位内固定术
174	C03眼科口腔	2023-04-09	2023-04-23	3358137	金培云	男	65Y	上颌骨骨折	筛窦上颌窦蝶窦炎;腔隙性脑梗死;面部挫伤;胫骨骨折;鼻骨骨折;肺大泡	治愈	聂鑫	聂鑫	徐兴侨	上颌骨骨折切开复位内固定术
175	C03眼科口腔	2023-04-13	2023-04-24	3358350	朱千寿	男	68Y	双踝骨折	前列腺结石;前列腺增生	治愈	水小龙	水小龙	218241	踝关节骨折切开复位钢板内固定术
176	C03眼科口腔	2023-04-17	2023-04-24	3358404	徐阿芬	女	64Y	肱骨上端骨折		治愈	杨雷	胡炜	218371	肱骨骨折切开复位钢板内固定术;关节软骨修复术;肱骨人工骨植骨术
177	C03眼科口腔	2023-04-19	2023-04-25	3358995	熊延达	男	46Y	取除骨折内固定装置	脂肪肝;肾结石;前列腺结石	其他	陈华	孙辽军	王特	股骨内固定装置去除术;肱骨内固定装置去除术
178	C03眼科口腔	2023-04-19	2023-04-26	3359185	朱海俊	男	26Y	颧弓骨折	上颌窦骨折;筛窦炎;上颌窦炎;面部挫伤;眶骨骨折;颞骨骨折	治愈	聂鑫	徐兴侨	黄武	颧骨骨折切开复位内固定术
179	C03眼科口腔	2023-04-12	2023-04-26	3359245	陈立永	男	49Y	桡骨下端骨折	慢性乙型病毒性肝炎;肺炎;肺结节	治愈	余可和	余可和	218019	桡骨骨折切开复位螺钉内固定术
180	C03眼科口腔	2023-04-13	2023-04-26	3359260	缪传镏	男	13Y	胫腓骨干骨折	第一掌骨骨折	治愈	余可和	余可和	218019	胫骨骨折切开复位钢板内固定术
181	C03眼科口腔	2023-04-16	2023-04-26	3359372	苏立友	男	69Y	开放性髌骨骨折	髌韧带扭伤;左房扩大;前列腺结石;前列腺增生;脂肪肝	治愈	陈龙	应晓洲	应晓洲	髌骨骨折切开复位张力带钢丝内固定术;髌韧带缝合术
182	C03眼科口腔	2023-04-17	2023-04-26	3359505	刘春梅	女	50Y	下颌骨骨折	桡骨下端骨折;头部外伤;锁骨骨折;肋骨骨折	治愈	聂鑫	徐兴侨	黄武	锁骨人工骨植骨术;下颌骨骨折切开复位内固定术;锁骨骨折切开复位钢板内固定术
183	C03眼科口腔	2023-04-20	2023-04-28	3360063	张俊虎	男	43Y	胫骨骨折	前列腺结石	治愈	胡月正	柳海晓	许心弦	胫骨骨折切开复位钢板内固定术
184	C03眼科口腔	2023-04-22	2023-04-29	3360310	袁朝顺	男	29Y	眶骨骨折		好转	郑海华	林达	林达	眶骨骨折切开复位内固定术
185	C03眼科口腔	2023-04-24	2023-04-30	3360915	石江海	男	47Y	眶骨骨折	眼睑挫伤;鼻骨骨折;颧骨骨折;面部挫伤	好转	郑海华	冯旺强	林达
186	C03眼科口腔	2023-04-25	2023-05-01	3361594	宋含柱	男	44Y	取除骨折内固定装置	支气管扩张;肺大泡;陈旧性肺结核	其他	余可和	余可和	王少华2	踝关节内固定装置去除术
187	C03眼科口腔	2023-04-22	2023-05-02	3361706	林召明	男	40Y	上颌骨骨折	多发性肋骨骨折;肺大泡	未愈	聂鑫	肖进	于健涛
188	C03眼科口腔	2023-04-26	2023-05-02	3361711	徐云珠	女	64Y	取除骨折内固定装置		其他	聂鑫	肖进	于健涛	下颌骨内固定装置取出术
189	C03眼科口腔	2023-04-28	2023-05-02	3361854	丁思思	女	27Y	取除骨折内固定装置		其他	余可和	余可和	王少华2	锁骨内固定装置去除术
190	C03眼科口腔	2023-04-28	2023-05-03	3361946	金列升	男	64Y	取除骨折内固定装置	肾结石	其他	冯永增	冯永增	蔡乐益	髌骨内固定装置去除术
191	C03眼科口腔	2023-04-27	2023-05-06	3362929	叶少芬	女	55Y	颧弓骨折	上颌窦骨折;眶骨骨折	好转	郑海华	林达	林达	眶骨骨折切开复位内固定术
192	C03眼科口腔	2023-04-22	2023-05-07	3363349	陈玉双	女	57Y	下颌骨骨折		治愈	聂鑫	徐兴侨	黄武	髁突高位切除术
193	C03眼科口腔	2023-05-07	2023-05-08	3363915	赵桂香	女	36Y	桡骨下端骨折		好转	王振文	水小龙	周呈伟
194	C03眼科口腔	2023-05-06	2023-05-09	3364182	缪素玉	女	63Y	取除骨折内固定装置	人工髋关节;肝囊肿;下肢静脉曲张	其他	赵友明	赵友明	柯陈荣	桡骨内固定装置去除术
195	C03眼科口腔	2023-05-05	2023-05-09	3364489	周佰好	男	25Y	取除骨折内固定装置		其他	余可和	余可和	王少华2	桡骨内固定装置去除术
196	C03眼科口腔	2023-04-13	2023-05-11	3365119	王斌	男	49Y	眼球破裂伤	面部损伤;玻璃体积血;视网膜脱离;前房积血;眼睑裂伤;眶骨骨折;上睑下垂;虹膜离断;脉络膜脱离;单眼白内障（左）	治愈	郑海华	杨顺海	宋广伟	面神经减压术;面神经缝合术;皮肤和皮下坏死组织切除清创术;虹膜离断缝合术;白内障超声乳化抽吸术;后入路玻璃体切割术;视网膜脱离激光治疗术;视网膜病损激光凝固术;眼球破裂修补术;眼睑裂伤缝合术;结膜裂伤修补术;玻璃体硅油置入术，用于视网膜再附着
197	C03眼科口腔	2023-05-06	2023-05-13	3365610	何亮	男	28Y	取除骨折内固定装置		其他	冯旺强	杨顺海	林达	去除面骨内固定装置
198	C03眼科口腔	2023-05-09	2023-05-13	3365923	李君	男	33Y	取除骨折内固定装置	肾结石;腰椎退行性病变;脂肪肝;后天性肾囊肿	其他	赵友明	赵友明	柯陈荣	脊柱内固定装置去除术
199	C03眼科口腔	2023-05-06	2023-05-13	3365944	徐月红	女	66Y	取除骨折内固定装置	角膜云翳;双眼白内障;入脑前血管特指畸形;腰椎骨折L5;多发性肋骨骨折;下肢动脉粥样硬化;多发性脑梗死;高血压病;2型糖尿病;骨盆骨折;膝关节僵硬	其他	韩晓辉	董志章	宋广伟	桡骨内固定装置去除术;腓骨内固定装置去除术;上颌骨内固定装置取出术
200	C03眼科口腔	2023-05-09	2023-05-13	3365984	张贵夫	男	62Y	取除骨折内固定装置	肝钙化灶;脂肪肝	其他	赵友明	赵友明	柯陈荣	胫骨内固定装置去除术;腓骨内固定装置去除术;踝关节内固定装置去除术
201	C03眼科口腔	2023-04-10	2023-05-13	3366016	卢田	男	23Y	下颌骨骨折	鼻中隔骨折;蝶骨骨折;肘关节脱位;肺挫伤;创伤性气胸;髌骨骨折;股骨干骨折;股骨颈骨折;尺骨上端骨折;尺骨骨折;肱骨骨折;眶骨骨折;鼻骨骨折;肘关节骨折;颌关节脱位;颧骨和上颌骨骨折	好转	聂鑫	聂鑫	于健涛	下颌骨骨折切开复位内固定术;上颌骨骨折切开复位内固定术;眶骨骨折切开复位内固定术;肘关节脱位手法整复术;肱骨骨折切开复位钢板内固定术;肘关节脱位切开复位内固定术;髁突骨折切开复位内固定术;股骨骨折闭合复位髓内针内固定术;尺骨骨折切开复位钢板内固定术
202	C03眼科口腔	2023-05-07	2023-05-13	3366068	王薇薇	女	60Y	外踝骨折	取除骨折内固定装置	治愈	余可和	余可和	王少华2	踝关节骨折切开复位螺钉内固定术;髌骨内固定装置去除术
203	C03眼科口腔	2023-05-07	2023-05-14	3366200	朱荣荣	女	33Y	骨折畸形愈合		治愈	洪建军	余洋	郑亦静	胫骨人工骨植骨术;胫骨骨折切开复位钢板内固定术;膝外侧半月板切除术
204	C03眼科口腔	2023-05-08	2023-05-15	3366803	叶其双	男	48Y	肘关节僵硬	取除骨折内固定装置	治愈	水小龙	水小龙	周呈伟	尺骨内固定装置去除术;肘关节松解术
205	C03眼科口腔	2023-05-14	2023-05-15	3366809	陈少瓯	女	36Y	取除骨折内固定装置		其他	冯旺强	杨顺海	林达	去除面骨内固定装置
206	C03眼科口腔	2023-05-08	2023-05-15	3366943	杨大永	男	59Y	桡骨下端骨折	特指腕骨骨折;2型糖尿病;肝肿物;肺结节	治愈	余可和	余可和	王少华2	桡骨骨折切开复位钢板内固定术;尺桡关节脱位切开复位术
207	C03眼科口腔	2023-05-08	2023-05-16	3367195	王家明	男	49Y	取除骨折内固定装置	高血压病	其他	聂鑫	肖进	于健涛	下颌骨内固定装置取出术
208	C03眼科口腔	2023-05-13	2023-05-16	3367238	徐冬英	女	69Y	取除骨折内固定装置		其他	余可和	余可和	王少华2	肱骨内固定装置去除术
209	C03眼科口腔	2023-05-08	2023-05-17	3367536	胡将云	男	68Y	眶骨骨折	颧弓骨折;上颌骨骨折;陈旧性肺结核;双眼白内障	治愈	冯旺强	杨顺海	林达	上颌骨骨折切开复位内固定术;颧骨骨折切开复位内固定术;眶骨骨折切开复位内固定术
210	C03眼科口腔	2023-05-10	2023-05-17	3367631	陈显月	女	56Y	尺骨桡骨远端骨折	肝囊肿;脂肪肝	好转	陈龙	陈龙	应晓洲	桡骨骨折切开复位钢板内固定术
211	C03眼科口腔	2023-05-15	2023-05-17	3367834	陶青山	男	39Y	泪小管裂伤	低钾血症;眼睑裂伤;创伤性蛛网膜下腔出血;额骨骨折	治愈	郑海华	林达	林达	泪小管吻合术;泪小管穿线插管术;眼睑裂伤缝合术
212	C03眼科口腔	2023-05-10	2023-05-20	3368650	叶晓亮	男	41Y	取除骨折内固定装置		其他	聂鑫	肖进	于健涛	上颌骨内固定装置取出术
213	C03眼科口腔	2023-05-06	2023-05-20	3368770	陈知营	男	49Y	跟骨骨折	腰椎骨折L1	治愈	王振文	水小龙	周呈伟	跟骨骨折切开复位钢板内固定术;关节软骨修复术
214	C03眼科口腔	2023-05-07	2023-05-20	3368778	周美堂	女	64Y	胫骨骨折	脾大;乙型肝炎大三阳;膝关节积液;高血压病;肝硬化	治愈	赵友明	赵友明	柯陈荣	胫骨骨折切开复位钢板内固定术;腓骨人工骨植骨术;关节软骨修复术
215	C03眼科口腔	2023-05-03	2023-05-20	3368926	李协其	男	17Y	眶骨骨折	上颌骨骨折;鼻骨骨折;额骨骨折;额窦上颌窦蝶窦炎;创伤性硬脑膜外血肿;脑挫伤;创伤性蛛网膜下腔出血;眼挫伤;颅腔积气;上颌窦炎	治愈	韩晓辉	董志章	宋广伟	颅骨骨折复位术;眶骨骨折切开复位内固定术
216	C03眼科口腔	2023-05-17	2023-05-22	3369634	雷大立	女	46Y	取除骨折内固定装置	胸腔积液;脂肪肝	其他	黄俊武	余贤斌	郑文浩	股骨内固定装置去除术
217	C03眼科口腔	2023-05-16	2023-05-22	3369783	陈安平	男	52Y	取除骨折内固定装置	前列腺结石;脂肪肝;肺大泡;肺结核	其他	陈华	陈华	王特	踝关节内固定装置去除术
218	C03眼科口腔	2023-05-14	2023-05-22	3369822	潘长富	男	49Y	眶骨骨折	肺钙化;肺结节;多发性肋骨骨折;肺特指疾患;面部挫伤;肝钙化灶;肺大泡;颧弓骨折	好转	郑海华	林达	林达	眶骨骨折切开复位内固定术;髂骨骨折切开复位钢板内固定术
219	C03眼科口腔	2023-05-16	2023-05-23	3370196	阮颂	男	39Y	取除骨折内固定装置		其他	聂鑫	肖进	于健涛	下颌骨内固定装置取出术
220	C03眼科口腔	2023-05-20	2023-05-24	3370436	杨兰花	女	61Y	原发性闭角型青光眼	眶骨骨折;上睑下垂;双眼白内障	好转	郑穗联	夏哲人	郭燕	滤帘切除术[小梁切除术]
221	C03眼科口腔	2023-05-09	2023-05-24	3370667	罗响	男	41Y	开放性下颌骨骨折		治愈	聂鑫	程碧环	于健涛	下颌骨骨折切开复位内固定术;下颌骨骨折闭合性复位术
222	C03眼科口腔	2023-05-09	2023-05-24	3370695	周雪华	女	58Y	胫腓骨下端骨折	低钾血症;心房颤动;心功能Ⅲ级;风湿性心脏病	治愈	余可和	余可和	王少华2	胫骨骨折切开复位钢板内固定术;腓骨骨折切开复位钢板内固定术
223	C03眼科口腔	2023-05-22	2023-05-27	3371343	陈苗苗	女	29Y	取除骨折内固定装置		其他	赵友明	柯陈荣	柯陈荣	踝关节内固定装置去除术
224	C03眼科口腔	2023-05-11	2023-05-27	3371406	曹普院	男	36Y	Pilon骨折	跟骨骨折;胆囊息肉;脂肪肝	治愈	陈龙	应晓洲	应晓洲	胫骨骨折切开复位钢板内固定术;胫骨植骨术;跟骨人工骨植骨术;跟骨骨折切开复位钢板内固定术
225	C03眼科口腔	2023-05-18	2023-05-27	3371411	金则美	女	67Y	开放性桡骨下端骨折	胸腔积液;多发性肋骨骨折;肺结节	治愈	陈龙	应晓洲	应晓洲	皮肤伤口切除性清创术;桡骨骨折切开复位钢板内固定术
226	C03眼科口腔	2023-05-23	2023-05-27	3371470	李来旺	男	56Y	取除骨折内固定装置	室性早搏;由于禁忌症未进行操作;2型糖尿病	其他	陈华	孙辽军	王特
227	C03眼科口腔	2023-05-18	2023-05-27	3371606	黄文艺	男	22Y	下颌骨骨折	面神经炎;胆囊息肉;脂肪肝;甲状腺囊肿	治愈	聂鑫	于跃远	于健涛	下颌骨骨折切开复位内固定术
228	C03眼科口腔	2023-05-17	2023-05-28	3371946	林存卓	男	58Y	髌骨骨折	前列腺结石;前列腺增生;胆囊息肉;后天性肾囊肿	治愈	翁益民	翁益民	项光恒	髌骨骨折切开复位张力带钢丝内固定术
229	C03眼科口腔	2023-05-17	2023-05-29	3372553	郑而芬	女	44Y	双踝骨折	肝回声不均	治愈	翁益民	翁益民	项光恒	踝关节骨折切开复位钢板内固定术
230	C03眼科口腔	2023-05-23	2023-05-30	3372845	胡美丽	女	45Y	外踝骨折	胆囊息肉;脂肪肝	治愈	冯永增	冯永增	蔡乐益	踝关节骨折切开复位钢板内固定术
231	C03眼科口腔	2023-05-18	2023-05-31	3373306	陈世勇	男	64Y	下颌骨骨折		治愈	聂鑫	肖进	于健涛	下颌骨骨折切开复位内固定术
232	C03眼科口腔	2023-05-17	2023-05-31	3373471	洪群芳	女	28Y	肱骨上端骨折	肾结石	治愈	余可和	余可和	王少华2	肱骨骨折切开复位钢板内固定术;肱骨人工骨植骨术
233	C03眼科口腔	2023-05-05	2023-05-31	3373519	张锦林	男	65Y	眶内恶性肿瘤	慢性乙型病毒性肝炎;高脂血症;双眼白内障;胫骨上端骨折;半月板损伤;2型糖尿病;原发性醛固酮过多症;腔隙性脑梗死;腰椎关节强硬;脑梗死后遗症	好转	韩晓辉	杨顺海	林达	眶内病损切除术
234	C03眼科口腔	2023-05-18	2023-06-02	3374094	谢如元	男	24Y	胫腓骨下端骨折		好转	陈龙	应晓洲	应晓洲	胫骨骨折切开复位钢板内固定术
235	C03眼科口腔	2023-05-27	2023-06-03	3374363	叶宁宁	男	31Y	取除骨折内固定装置	前列腺结石;胆囊息肉	其他	孙辽军	陈华	蔡乐益	踝关节内固定装置去除术
236	C03眼科口腔	2023-05-26	2023-06-03	3374450	郑云芽	女	49Y	锁骨骨折	脂肪肝;肾结石	好转	赵友明	赵友明	方文来	锁骨骨折切开复位钢板内固定术;骨空隙骨水泥填充术
237	C03眼科口腔	2023-05-27	2023-06-04	3374704	柯恩朋	男	29Y	膝外侧半月板伴十字韧带损伤	膝挫伤;胫骨骨折;脂肪肝;膝关节外侧副韧带损伤	好转	赵友明	赵友明	方文来	膝关节后交叉韧带重建术;胫骨骨折切开复位钢板内固定术
238	C03眼科口腔	2023-05-24	2023-06-04	3374958	梁大银	男	41Y	跟骨骨折	距骨骨折	治愈	余可和	余可和	王少华2	跟骨骨折切开复位钢板内固定术
239	C03眼科口腔	2023-05-25	2023-06-05	3375489	李凤雪	女	11Y	眶骨骨折	上颌骨骨折;颧弓骨折	好转	韩晓辉	杨顺海	林达	上颌骨骨折切开复位内固定术;颧骨骨折切开复位内固定术;眶骨骨折切开复位内固定术
240	C03眼科口腔	2023-05-30	2023-06-06	3375649	滕莲英	女	63Y	双踝骨折	肺部阴影;肾结石;胆囊结石	好转	陈龙	王特	王特	踝关节骨折切开复位钢板内固定术
241	C03眼科口腔	2023-06-03	2023-06-06	3375739	戴洁蓓	女	40Y	取除骨折内固定装置	脂肪肝	其他	陈华	孙辽军	蔡乐益	踝关节内固定装置去除术
242	C03眼科口腔	2023-05-24	2023-06-06	3375959	潘冬彩	女	53Y	双踝骨折	跖趾关节扭伤;跖趾关节脱位;非器质性精神病;胆囊结石;2型糖尿病;多处挫伤;肝囊肿;脂肪肝	治愈	余可和	余可和	王少华2	踝关节骨折切开复位钢板内固定术;踝脱位开放性复位术;足关节囊缝合术
243	C03眼科口腔	2023-06-05	2023-06-07	3376341	张绍军	男	60Y	取除骨折内固定装置		其他	韩晓辉	董志章	林达	去除面骨内固定装置
244	C03眼科口腔	2023-06-03	2023-06-07	3376415	英世林	男	16Y	鼻骨骨折	上颌骨骨折	治愈	聂鑫	倪丽艳	徐冬冬	鼻骨折闭合性复位术
245	C03眼科口腔	2023-06-03	2023-06-08	3376459	陈丽芬	女	56Y	取除骨折内固定装置	肺部阴影	其他	陈华	孙辽军	蔡乐益	髌骨内固定装置去除术
246	C03眼科口腔	2023-05-31	2023-06-10	3377119	林宣芹	女	50Y	胫骨骨折	脂肪肝	治愈	陈龙	王特	王特	胫骨骨折切开复位钢板内固定术
247	C03眼科口腔	2023-05-29	2023-06-10	3377141	林国富	男	58Y	眼球破裂伤	颧弓骨折;玻璃体积血;视网膜脱离;前房积血;2型糖尿病;脑挫伤;眶骨骨折;脉络膜脱离	治愈	冯旺强	董志章	林达	眼球破裂修补术;前房冲洗术;后入路玻璃体切割术;眼睑裂伤缝合术
248	C03眼科口腔	2023-05-20	2023-06-12	3377906	林益钏	男	55Y	胫骨远端骨折伴腓骨骨折	前列腺增生;前列腺结石;房性期前收缩[房性早搏];膀胱结石	治愈	翁益民	翁益民	项光恒	胫骨外固定术;腓骨骨折切开复位钢板内固定术;腓骨人工骨植骨术;踝关节修补术;胫骨骨折闭合复位螺钉内固定术
249	C03眼科口腔	2023-06-03	2023-06-14	3378856	周理顺	男	53Y	下颌骨骨折		治愈	聂鑫	聂鑫	徐冬冬	下颌骨骨折切开复位内固定术;拔牙术;口内皮瓣移植术
250	C03眼科口腔	2023-06-02	2023-06-14	3378859	郑君田	男	55Y	跟骨骨折	前列腺结石;脂肪肝	治愈	赵友明	方文来	方文来	跟骨骨折切开复位钢板内固定术;关节软骨修复术
251	C03眼科口腔	2023-05-30	2023-06-14	3378863	沈世好	男	45Y	跟骨骨折	前列腺增生;肝钙化灶;脂肪肝	治愈	翁益民	翁益民	项光恒	跟骨骨折切开复位钢板内固定术;跟骨人工骨植骨术
252	C03眼科口腔	2023-06-10	2023-06-15	3379168	林荣滔	男	18Y	取除骨折内固定装置		其他	陈华	孙辽军	蔡乐益	桡骨内固定装置去除术
253	C03眼科口腔	2023-05-27	2023-06-15	3379400	麻飞龙	男	14Y	取除骨折内固定装置		其他	聂鑫	聂鑫	徐冬冬	去除面骨内固定装置;瘢痕单纯切除,Z字改形修复术;颞下颌关节成形术;颞颌关节盘固定术
254	C03眼科口腔	2023-06-06	2023-06-17	3379857	高月凤	女	64Y	外踝骨折	高血压病;脂肪肝;肺结节	治愈	赵友明	赵友明	方文来	踝关节骨折切开复位钢板内固定术
255	C03眼科口腔	2023-06-12	2023-06-17	3379940	陈坚	男	38Y	眶骨骨折	颧骨骨折;上颌骨骨折;额骨骨折	好转	郑海华	林达	林达	颧骨骨折切开复位内固定术;上颌骨骨折切开复位内固定术;眶骨骨折切开复位内固定术
256	C03眼科口腔	2023-06-09	2023-06-18	3380262	金米云	男	54Y	尺骨茎突骨折伴桡骨远端骨折	三角骨骨折;腰椎间盘突出;腰椎椎管狭窄;骶髂关节炎;前列腺结石	治愈	赵友明	方文来	方文来	桡骨骨折切开复位钢板内固定术
257	C03眼科口腔	2023-06-10	2023-06-18	3380310	沈恩慧	女	9Y	病理性骨折，不可归类在他处者	骨囊肿	好转	赵友明	方文来	方文来
258	C03眼科口腔	2023-06-18	2023-06-19	3381095	何广朝	男	21Y	取除骨折内固定装置		其他	郑海华	林达	林达	去除面骨内固定装置
259	C03眼科口腔	2023-05-24	2023-06-19	3381116	袁光理	男	51Y	跟骨骨折	窦性心动过缓;前列腺囊肿;前列腺增生	治愈	翁益民	翁益民	项光恒	跟骨骨折切开复位钢板内固定术;跟骨人工骨植骨术
260	C03眼科口腔	2023-06-06	2023-06-20	3381357	泮东芳	女	63Y	眼球破裂伤	高血压;视网膜脱离;无晶状体;前房积血;眶骨骨折;角膜血染;脉络膜脱离;眼内出血	治愈	郑海华	杨顺海	林达	后入路玻璃体切割术;前房成形术;前房冲洗术;眼球破裂修补术
261	C03眼科口腔	2023-06-13	2023-06-20	3381383	钟方修	男	49Y	胫腓骨干骨折	2型糖尿病;前列腺结石;脂肪肝	好转	陈华	孙辽军	蔡乐益	胫骨骨折切开复位钢板内固定术;胫骨人工骨植骨术
262	C03眼科口腔	2023-06-17	2023-06-20	3381575	陈波波	男	31Y	眶骨骨折		治愈	韩晓辉	杨顺海	林达	眶骨骨折切开复位内固定术
263	C03眼科口腔	2023-06-15	2023-06-21	3382043	陈云龙	男	39Y	锁骨骨折	脂肪肝	好转	王振文	水小龙	徐宏威	锁骨骨折切开复位钢板内固定术
264	C03眼科口腔	2023-06-15	2023-06-21	3382072	夏晨豪	男	17Y	踝关节扭伤	距骨骨折	治愈	余可和	余可和	王少华2	踝关节韧带修补术;踝关节游离体取出术
265	C03眼科口腔	2023-06-04	2023-06-21	3382099	薛洪远	男	50Y	下颌骨骨折	颧弓骨折;蝶骨骨折;眶骨骨折;上颌骨骨折;鼻骨骨折;颞骨骨折	治愈	聂鑫	聂鑫	徐冬冬	下颌骨骨折切开复位内固定术;上颌骨骨折闭合性复位术;拔牙术
266	C03眼科口腔	2023-06-12	2023-06-21	3382118	邹邵超	男	28Y	锁骨肩峰端骨折		治愈	翁益民	翁益民	项光恒	锁骨骨折切开复位钢板内固定术
267	C03眼科口腔	2023-06-14	2023-06-22	3382275	蒋泽涛	男	10Y	眶内异物	面部异物;面部裂伤;眶骨骨折;上颌骨骨折	治愈	冯旺强	杨顺海	林达	眶切开异物取出术;皮肤和皮下组织异物切开取出术
268	C03眼科口腔	2023-06-14	2023-06-22	3382305	贾文军	男	53Y	锁骨骨折	肋骨多处骨折	治愈	陈龙	陈龙	王特	锁骨骨折切开复位钢板内固定术
269	C03眼科口腔	2023-06-16	2023-06-22	3382390	严香素	女	55Y	腰椎骨折	后天性肾囊肿;肾结石;腰椎间盘突出;腰椎退行性病变	好转	赵友明	方文来	方文来	腰椎骨折球囊扩张成形术;经皮椎骨成形术
270	C03眼科口腔	2023-06-20	2023-06-24	3383165	王冬翠	女	63Y	取除骨折内固定装置	后天性肾囊肿;肝囊肿;脂肪肝;高血压性心脏病	其他	余可和	余可和	王少华2	胫骨内固定装置去除术
271	C03眼科口腔	2023-06-14	2023-06-24	3383194	施香妹	女	62Y	髌骨骨折	高血压;胆囊结石;肝囊肿;脂肪肝	好转	赵友明	方文来	方文来	髌骨骨折切开复位张力带钢丝内固定术;关节软骨修复术;髌韧带缝合术
272	C03眼科口腔	2023-06-13	2023-06-24	3383266	卢建值	男	56Y	跟骨骨折	肾结石;诊断性影像检查的异常所见，其他特指身体结构的;高血压;前列腺增生;胆囊息肉;肝囊肿;脂肪肝;陈旧性肺结核	治愈	翁益民	翁益民	项光恒	跟骨骨折切开复位钢板内固定术
273	C03眼科口腔	2023-06-12	2023-06-25	3378125	周文豪	男	42Y	胫骨平台骨折	肾错构瘤;胆囊息肉;脂肪肝	好转	翁益民	翁益民	项光恒	胫骨骨折切开复位钢板内固定术
274	C03眼科口腔	2023-06-15	2023-06-25	3383502	林细哄	男	54Y	骨折内固定装置障碍	后天性肾囊肿;锁骨骨折不连接;前列腺增生;脂肪肝	好转	陈华	孙辽军	蔡乐益	锁骨骨折切开复位钢板内固定术;髂骨切除术用作移植物;锁骨内固定装置去除术;锁骨植骨术
275	C03眼科口腔	2023-06-20	2023-06-25	3383596	吴春秀	女	32Y	取除骨折内固定装置		其他	陈华	孙辽军	蔡乐益	踝关节内固定装置去除术
276	C03眼科口腔	2023-06-21	2023-06-26	3384121	黄显对	男	36Y	取除骨折内固定装置		其他	聂鑫	李锋	徐冬冬	上颌骨内固定装置取出术
277	C03眼科口腔	2023-06-24	2023-06-27	3384397	周彩弟	女	73Y	胸椎骨折	胸椎退行性病变;后天性肾囊肿;腰椎退行性病变;骨折术后恢复期;阑尾术后	治愈	徐晖	田乃锋	周凯亮	经皮椎骨成形术;胸椎骨折球囊扩张成形术
278	C03眼科口腔	2023-06-24	2023-06-27	3384462	黄春花	女	73Y	腰椎骨折	胸椎退行性病变;胸椎骨折;腰椎退行性病变;肺结节	好转	徐晖	田乃锋	周凯亮	胸椎骨折球囊扩张成形术;经皮椎骨成形术;腰椎骨折球囊扩张成形术
279	C03眼科口腔	2023-06-18	2023-06-28	3384910	汪志建	男	27Y	眶骨骨折	手术后状态，其他特指的;创伤性硬膜外出血;肺大疱;鼻窦炎;颅腔积气;多处挫伤;脑震荡;颧骨骨折;鼻骨骨折;颞骨骨折;顶骨骨折;脂肪肝	治愈	冯旺强	杨顺海	宋广伟	眶骨骨折切开复位内固定术;颧骨骨折切开复位内固定术
280	C03眼科口腔	2023-06-11	2023-06-28	3385052	杨景耀	男	86Y	下颌骨囊肿	病理性骨折，不可归类在他处者	治愈	聂鑫	李锋	徐冬冬	下颌骨病损切除术;拔牙术;下颌骨骨折切开复位内固定术
281	C03眼科口腔	2023-06-15	2023-06-29	3385491	胡子奇	男	14Y	下颌骨骨折	跖骨骨折;上颌骨骨折	治愈	聂鑫	聂鑫	徐冬冬	下颌骨骨折切开复位内固定术;跖骨骨折切开复位钢针内固定术
282	C03眼科口腔	2023-06-27	2023-06-30	3385645	连金彩	女	62Y	取除骨折内固定装置	骨质疏松，其他的;肺部阴影	其他	洪建军	卢晓郎	卢晓郎	桡骨内固定装置去除术;瘢痕单纯切除,Z字改形修复术
283	C03眼科口腔	2023-06-25	2023-06-30	3385650	黄程豪	男	27Y	取除骨折内固定装置	脂肪肝;后天性趾缺失	其他	余可和	余可和	王少华2	趾骨内固定装置去除术
284	C03眼科口腔	2023-06-25	2023-06-30	3385654	彭亮	男	15Y	取除骨折内固定装置		其他	余可和	余可和	王少华2	骨盆内固定装置去除术
285	C03眼科口腔	2023-06-27	2023-07-01	3385852	董如意	女	29Y	取除骨折内固定装置	肾超声检查异常	其他	陈华	陈华	蔡乐益	跖骨内固定装置去除术
286	C03眼科口腔	2023-06-27	2023-07-01	3386075	王燕芬	女	62Y	胸椎骨折	骨质疏松，其他的;脂肪肝;胸椎退行性病变	治愈	徐晖	徐晖	周凯亮	经皮椎骨成形术;胸椎骨折球囊扩张成形术
287	C03眼科口腔	2023-06-23	2023-07-02	3386350	李爱兰	女	61Y	锁骨骨折	脂肪肝	好转	翁益民	翁益民	项光恒	锁骨骨折切开复位钢板内固定术
288	C03眼科口腔	2023-06-25	2023-07-02	3386527	应爱莲	女	55Y	取除骨折内固定装置	乳房纤维囊性乳腺病;子宫平滑肌瘤	其他	陈华	孙辽军	蔡乐益	髌骨内固定装置去除术
289	C03眼科口腔	2023-06-30	2023-07-02	3386532	杨崇连	男	52Y	桡骨远端骨折	高血压	未愈	赵友明	方文来	方文来
290	C03眼科口腔	2023-06-20	2023-07-02	3386550	林杰	男	34Y	下颌骨骨折	上颌窦炎	治愈	聂鑫	聂鑫	徐冬冬	面骨骨折碎片取出术;筋膜皮瓣移植术
291	C03眼科口腔	2023-07-02	2023-07-03	3387028	饶晓康	男	28Y	取除骨折内固定装置		其他	冯旺强	董志章	林达	去除面骨内固定装置;上颌骨内固定装置取出术
292	C03眼科口腔	2023-06-20	2023-07-04	3387317	刘日兴	男	63Y	胫骨平台骨折	胫骨干骨折	好转	陈华	陈华	蔡乐益	胫骨骨折切开复位钢板内固定术;关节软骨修复术;胫骨人工骨植骨术
293	C03眼科口腔	2023-06-29	2023-07-04	3387345	王何媚	女	60Y	胸椎骨折	骨质疏松，其他的;胸椎退行性病变;椎管内蛛网膜囊肿;腰椎退行性病变;腰椎间盘突出	治愈	徐晖	田乃锋	周凯亮	腰椎骨折球囊扩张成形术
294	C03眼科口腔	2023-06-25	2023-07-05	3387799	连启明	男	50Y	尺骨和桡骨下端均骨折	后天性肾囊肿;肾钙化;特发性（原发性）高血压	好转	陈龙	陈龙	王特	关节软骨修复术;桡骨骨折切开复位钢板内固定术
295	C03眼科口腔	2023-07-04	2023-07-05	3387932	苏亨利	男	7Y	肱骨髁上骨折		好转	张敬东	闫广奎	李玉安
296	C03眼科口腔	2023-07-01	2023-07-05	3387964	黄佳萍	女	29Y	眶骨骨折	颧弓骨折	治愈	韩晓辉	董志章	骆伊丽	眶骨骨折切开复位内固定术
297	C03眼科口腔	2023-07-04	2023-07-05	3388119	郭紫莉	女	26Y	眶骨骨折		治愈	韩晓辉	杨顺海	宋广伟	眶骨骨折切开复位内固定术
298	C03眼科口腔	2023-07-02	2023-07-06	3388416	黄小林	女	66Y	腰椎骨折	腰椎间盘突出;腰椎椎管狭窄;特发性（原发性）高血压	治愈	徐晖	田乃锋	周凯亮	腰椎骨折球囊扩张成形术
299	C03眼科口腔	2023-07-04	2023-07-08	3389052	黄恩琪	女	12Y	取除骨折内固定装置		其他	黄俊武	余贤斌	郑文浩	踝关节内固定装置去除术
300	C03眼科口腔	2023-07-04	2023-07-08	3389171	冯果果	男	29Y	下颌骨骨折		未愈	聂鑫	李锋	徐冬冬
301	C03眼科口腔	2023-07-02	2023-07-08	3389218	林宏前	男	67Y	胸椎骨折	腰椎滑脱;骨质疏松，其他的;下肢静脉血栓形成;2型糖尿病;胸椎退行性病变;腰椎退行性病变;后天性肾囊肿;肾结石;前列腺增生;前列腺结石;下肢动脉粥样硬化;腰椎间盘突出;眼疲劳	治愈	徐晖	田乃锋	周凯亮	经皮椎骨成形术;腰椎骨折球囊扩张成形术
302	C03眼科口腔	2023-06-29	2023-07-09	3389555	郑碎红	女	50Y	股骨粗隆间骨折		治愈	翁益民	翁益民	项光恒	股骨骨折闭合复位髓内针内固定术
303	C03眼科口腔	2023-06-27	2023-07-10	3390182	范碎雄	男	67Y	眶骨骨折	颧骨骨折;上颌骨骨折;高血压;双眼白内障	治愈	韩晓辉	董志章	宋广伟	上颌骨骨折切开复位内固定术;颧骨骨折切开复位内固定术;眶骨骨折切开复位内固定术
304	C03眼科口腔	2023-07-09	2023-07-10	3390201	张金珠	女	50Y	取除骨折内固定装置		其他	韩晓辉	董志章	宋广伟	去除面骨内固定装置
305	C03眼科口腔	2023-06-30	2023-07-11	3390495	马林飞	男	46Y	胫骨平台伴髁间骨折	膝内侧半月板损伤;膝关节积液;脂肪肝;膝外侧半月板损伤;膝关节前十字韧带损伤;膝关节外侧副韧带损伤	好转	陈龙	陈龙	王特	膝关节前交叉韧带重建术;胫骨骨折切开复位螺钉内固定术
306	C03眼科口腔	2023-06-29	2023-07-12	3391181	赵美兰	女	70Y	肱骨近端骨折	下肢静脉曲张;肩袖肌腱损伤;肾超声检查异常;特发性（原发性）高血压;肝囊肿	治愈	余可和	余可和	王少华2	肩袖修补术;肱骨骨折切开复位螺钉内固定术
307	C03眼科口腔	2023-07-04	2023-07-12	3391197	李爱平	女	60Y	肱骨外科颈骨折	垂体前叶功能减退;继发性甲状腺功能减退症;继发性肾上腺皮质功能减退症;中枢性尿崩症;脂肪肝;胆囊结石;2型糖尿病	好转	陈龙	陈龙	王特	肩袖修补术;肱骨骨折切开复位钢板内固定术
308	C03眼科口腔	2023-07-11	2023-07-13	3391625	韩彬彬	男	30Y	眶骨骨折	鼻骨骨折;上颌骨骨折	治愈	冯旺强	杨顺海	宋广伟	眶骨骨折切开复位内固定术
309	C03眼科口腔	2023-07-04	2023-07-13	3391695	陈杰	男	22Y	肱骨干骨折	前臂桡神经损伤	好转	陈华	陈华	蔡乐益	桡神经探查术;肱骨人工骨植骨术;肱骨骨折切开复位钢板内固定术
310	C03眼科口腔	2023-07-06	2023-07-15	3392177	吴振宇	男	47Y	锁骨骨折	肋骨骨折;脂肪肝;肾结石	治愈	翁益民	翁益民	项光恒	锁骨骨折切开复位钢板内固定术
311	C03眼科口腔	2023-07-11	2023-07-15	3392244	胡成松	男	47Y	取除骨折内固定装置	耳重度聋	其他	黄俊武	余贤斌	郑文浩	桡骨内固定装置去除术
312	C03眼科口腔	2023-06-30	2023-07-15	3392295	吴洪能	男	50Y	胫骨平台骨折	膝关节后十字韧带损伤;半月板损伤;股骨头缺血性坏死;高血压;2型糖尿病;脂肪肝;胆囊结石;心脏瓣膜病;膝关节前十字韧带损伤;膝关节外侧副韧带损伤;膝关节内侧副韧带损伤	好转	赵友明	方文来	方文来	膝关节半月板成形术;胫骨骨折切开复位钢板内固定术;胫骨植骨术
313	C03眼科口腔	2023-07-11	2023-07-16	3392896	谢胜峰	男	14Y	取除骨折内固定装置		其他	翁益民	翁益民	项光恒	胫骨内固定装置去除术
314	C03眼科口腔	2023-07-02	2023-07-16	3393007	诸金和	男	62Y	跟骨骨折	外踝骨折;前列腺结石;高血压;2型糖尿病;高脂血症	好转	黄俊武	余贤斌	郑文浩	跟骨骨折切开复位钢板内固定术;跟骨人工骨植骨术;关节软骨修复术
315	C03眼科口腔	2023-06-27	2023-07-16	3393009	杨树昌	男	50Y	下颌骨骨折	面部裂伤	治愈	聂鑫	李锋	徐冬冬	下颌骨骨折切开复位内固定术;皮肤和皮下组织异物切开取出术
316	C03眼科口腔	2023-07-16	2023-07-17	3393384	周祥锐	男	17Y	取除骨折内固定装置		其他	韩晓辉	杨顺海	骆伊丽	去除面骨内固定装置
317	C03眼科口腔	2023-07-16	2023-07-18	3393892	冯果果	男	29Y	下颌骨骨折		未愈	聂鑫	李锋	徐冬冬
318	C03眼科口腔	2023-07-11	2023-07-18	3394107	何丽华	女	33Y	三踝骨折	肾结石	好转	陈龙	陈龙	王特	踝关节骨折切开复位螺钉内固定术
319	C03眼科口腔	2023-07-13	2023-07-19	3394327	方媞媞	女	28Y	取除骨折内固定装置		其他	陈华	孙辽军	蔡乐益	肱骨内固定装置去除术
320	C03眼科口腔	2023-07-18	2023-07-19	3394524	张有为	男	9Y	取除骨折内固定装置		其他	冯旺强	杨顺海	宋广伟	去除面骨内固定装置
321	C03眼科口腔	2023-07-11	2023-07-20	3394994	周新丹	女	14Y	取除骨折内固定装置		其他	聂鑫	李锋	徐冬冬	下颌骨内固定装置取出术
322	C03眼科口腔	2023-07-13	2023-07-20	3394997	周娟娟	女	64Y	三踝骨折	脂肪肝;后天性肾囊肿;心功能不全;肾超声检查异常	好转	陈龙	陈龙	王特	腓骨骨折切开复位钢板内固定术;踝关节骨折切开复位钢板内固定术
323	C03眼科口腔	2023-07-11	2023-07-21	3395197	马作景	男	31Y	踝关节骨折	脂肪肝;肝回声不均	治愈	孔建中	陈墨川	周呈伟	踝关节骨折切开复位螺钉内固定术;关节软骨修复术
324	C03眼科口腔	2023-07-04	2023-07-22	3395444	蔡瑞丹	女	34Y	胫腓骨干骨折	脂肪肝;窦性心动过速	好转	翁益民	翁益民	项光恒	胫骨人工骨植骨术;胫骨骨折切开复位钢板内固定术
325	C03眼科口腔	2023-07-01	2023-07-23	3396146	杨相红	男	46Y	开放性小肠破裂	腰椎骨折;创伤性气胸;下颌骨骨折	治愈	聂鑫	聂鑫	徐冬冬	小肠部分切除术;小肠破裂修补术;牙龈成形术;颅颌牵引;下颌骨骨折切开复位内固定术;腹腔镜检查
326	C03眼科口腔	2023-07-23	2023-07-24	3396663	申良	男	47Y	取除骨折内固定装置		其他	韩晓辉	董志章	骆伊丽	去除面骨内固定装置
327	C03眼科口腔	2023-07-14	2023-07-25	3397221	毕锐	男	23Y	眶骨骨折	颧弓骨折;上颌窦骨折;脑震荡;脑挫伤;面部挫伤;多处开放性伤口	治愈	冯旺强	董志章	宋广伟	眶骨骨折切开复位内固定术;颧骨骨折切开复位内固定术;上颌骨骨折切开复位内固定术
328	C03眼科口腔	2023-07-18	2023-07-26	3397488	王彩华	女	40Y	踝关节骨折	脂肪肝;肝回声不均	好转	陈龙	陈龙	王特	腓骨骨折切开复位钢板内固定术;踝关节骨折切开复位螺钉内固定术
329	C03眼科口腔	2023-07-19	2023-07-26	3397524	冉洪全	男	61Y	取除骨折内固定装置		其他	聂鑫	李锋	徐冬冬	下颌骨内固定装置取出术
330	C03眼科口腔	2023-07-12	2023-07-27	3398080	陈仙从	男	78Y	眶骨骨折	具有人工眼;单眼白内障（右）;2型糖尿病;特发性（原发性）高血压;胆囊结石;颧弓骨折;上颌骨骨折;多处挫伤	治愈	韩晓辉	韩晓辉	宋广伟	上颌骨骨折切开复位内固定术;颧骨骨折切开复位内固定术;眶骨骨折切开复位内固定术
331	C03眼科口腔	2023-07-25	2023-07-27	3398173	张红亮	男	46Y	双踝骨折	脂肪肝;胆囊结石	好转	陈龙	陈龙	王特
332	C03眼科口腔	2023-07-16	2023-07-29	3398516	季克和	男	50Y	踝关节骨折	脂肪肝;肝钙化灶;肝回声不均;肾结石;前列腺结石	好转	陈华	陈华	蔡乐益	关节软骨修复术;踝关节骨折切开复位钢板内固定术
333	C03眼科口腔	2023-07-25	2023-07-29	3398523	杨子单	男	13Y	取除骨折内固定装置		其他	黄俊武	余贤斌	郑文浩	皮肤瘢痕切除术;桡骨内固定装置去除术;尺骨内固定装置去除术
334	C03眼科口腔	2023-07-26	2023-07-29	3398711	郑仙凤	女	49Y	取除骨折内固定装置	脂肪肝;肝回声不均	其他	赵友明	方文来	方文来	桡骨内固定装置去除术
335	C03眼科口腔	2023-07-26	2023-07-29	3398789	叶洪柳	女	55Y	取除骨折内固定装置	脂肪肝;肝囊肿	其他	余可和	余可和	王少华2	锁骨内固定装置去除术
336	C03眼科口腔	2023-07-27	2023-07-29	3398870	庞斯瀚	男	12Y	胫骨下端骨折	脂肪肝	好转	赵友明	方文来	方文来
337	C03眼科口腔	2023-07-21	2023-07-29	3398875	王国林	男	51Y	骨折不连接\[假关节\]		治愈	陈龙	陈龙	王特	髂骨切除术用作移植物;胫骨植骨术;胫骨骨折切开复位钢板内固定术
338	C03眼科口腔	2023-07-19	2023-07-29	3399000	余唐银	男	29Y	眶骨骨折	颧弓骨折;上睑下垂;继发性肺结核;上颌骨骨折	治愈	韩晓辉	董志章	骆伊丽	颧骨骨折切开复位内固定术;眶骨骨折切开复位内固定术
339	C03眼科口腔	2023-07-26	2023-07-30	3399187	狄仁杰	男	32Y	取除骨折内固定装置	脂肪肝	其他	赵友明	方文来	方文来	踝关节内固定装置去除术
340	C03眼科口腔	2023-07-11	2023-07-30	3399196	刘良叶	女	56Y	取除骨折内固定装置	肝囊肿;肺部结节;肝回声不均;胆囊息肉;后天性肾囊肿	其他	陈华	孙辽军	蔡乐益	骨盆内固定装置去除术;股骨内固定装置去除术;胫骨内固定装置去除术
341	C03眼科口腔	2023-07-27	2023-07-31	3399735	周小眉	女	71Y	股骨颈骨折	主动脉钙化;糖尿病;心功能不全;脂肪肝	好转	陈龙	陈龙	王特	股骨骨折闭合复位螺钉内固定术
342	C03眼科口腔	2023-07-30	2023-07-31	3399916	黄佳杰	男	14Y	眶骨骨折		治愈	韩晓辉	韩晓辉	宋广伟	眶骨骨折切开复位内固定术
343	C03眼科口腔	2023-07-23	2023-08-01	3400216	杨光信	男	37Y	下颌骨骨折		治愈	聂鑫	李锋	徐冬冬	下颌骨骨折切开复位内固定术
344	C03眼科口腔	2023-07-30	2023-08-02	3400567	章淑颖	女	18Y	取除骨折内固定装置		其他	陈华	孙辽军	蔡乐益	锁骨内固定装置去除术
345	C03眼科口腔	2023-07-22	2023-08-02	3400603	吴陈兰	女	61Y	三踝骨折	踝关节半脱位;脂肪肝;下肢静脉曲张	治愈	翁益民	翁益民	项光恒	踝关节骨折切开复位钢板内固定术
346	C03眼科口腔	2023-07-11	2023-08-03	3401114	李述	男	28Y	跟骨骨折	脂肪肝	好转	赵友明	方文来	方文来	跟骨骨折切开复位钢板内固定术;关节软骨修复术;跟骨人工骨植骨术
347	C03眼科口腔	2023-07-30	2023-08-04	3401617	孙春苗	女	45Y	取除骨折内固定装置	胆囊息肉;子宫平滑肌瘤	其他	倪文飞	倪文飞	许聪	椎骨内固定物取出术
348	C03眼科口腔	2023-08-02	2023-08-05	3401704	张瑞雪	女	24Y	取除骨折内固定装置		其他	石成弟	石成弟	卢迪	踝关节内固定装置去除术
349	C03眼科口腔	2023-08-02	2023-08-05	3401800	陈小芬	女	50Y	取除骨折内固定装置		其他	石成弟	石成弟	卢迪	肱骨内固定装置去除术
350	C03眼科口腔	2023-07-18	2023-08-07	3402955	孙远上	男	32Y	跟骨骨折	肺的其他疾患;心脏瓣膜病;脂肪肝	好转	赵友明	方文来	方文来	关节软骨修复术;跟骨骨折切开复位钢板内固定术;跟骨人工骨植骨术
351	C03眼科口腔	2023-08-06	2023-08-07	3403126	栗华云	女	41Y	取除骨折内固定装置		其他	冯旺强	董志章	骆伊丽	去除面骨内固定装置;桡骨内固定装置去除术
352	C03眼科口腔	2023-07-30	2023-08-08	3403471	卢奔	男	31Y	跟骨骨折	脂肪肝	好转	赵友明	方文来	方文来	跟骨骨折切开复位钢板内固定术;关节软骨修复术
353	C03眼科口腔	2023-08-01	2023-08-09	3403991	彭美玲	女	5Y	取除骨折内固定装置		其他	聂鑫	聂鑫	于健涛	下颌骨内固定装置取出术
354	C03眼科口腔	2023-08-02	2023-08-09	3404157	李天朋	男	53Y	眶骨骨折	颧弓骨折;上颌骨骨折;白内障;特发性(原发性)高血压	治愈	韩晓辉	杨顺海	宋广伟	上颌骨骨折切开复位内固定术;颧骨骨折切开复位内固定术;眶骨骨折切开复位内固定术
355	C03眼科口腔	2023-08-07	2023-08-09	3404265	林周杰	男	16Y	取除骨折内固定装置	窦性心律失常	其他	翁益民	翁益民	项光恒	骨盆内固定装置去除术
356	C03眼科口腔	2023-08-06	2023-08-12	3404865	王杨翠	女	53Y	桡骨头骨折	肱骨外髁骨折;肘关节骨折;下肢动脉粥样硬化;下肢静脉血栓形成;脂肪肝;子宫平滑肌瘤;宫颈囊肿	治愈	黄俊武	余贤斌	郑文浩	关节软骨修复术;桡骨骨折切开复位钢板内固定术
357	C03眼科口腔	2023-08-08	2023-08-12	3404950	李嘉树	男	14Y	取除骨折内固定装置		其他	黄俊武	余贤斌	郑文浩	骨盆内固定装置去除术
358	C03眼科口腔	2023-07-27	2023-08-12	3404995	郭国兴	男	49Y	上颌骨骨折	桡骨下端骨折	治愈	聂鑫	肖进	于健涛	桡骨骨折切开复位钢板内固定术;上颌骨骨折切开复位内固定术;皮肤和皮下坏死组织切除清创术;颅骨牵引术
359	C03眼科口腔	2023-08-04	2023-08-12	3405139	蔡红飞	女	52Y	髌骨骨折	高血压;子宫切除术后状态;脂肪肝;多发性肝囊肿;胆囊结石	好转	黄俊武	余贤斌	郑文浩	关节软骨修复术;髌骨骨折切开复位张力带钢丝内固定术
360	C03眼科口腔	2023-07-26	2023-08-12	3405197	朱菊飞	女	48Y	Pilon骨折	肺间质纤维化;下肢动脉粥样硬化;踝关节脱位;距骨骨折	好转	赵友明	方文来	方文来	踝关节骨折切开复位钢板内固定术;关节软骨修复术;腓骨骨折切开复位钢板内固定术
361	C03眼科口腔	2023-07-27	2023-08-13	3405483	徐国政	男	55Y	胫骨骨干骨折	髂骨骨折;后天性肾囊肿;肺气肿合并肺大泡;窦性心律失常	治愈	翁益民	翁益民	项光恒	胫骨人工骨植骨术;胫骨骨折切开复位钢板内固定术
362	C03眼科口腔	2023-07-31	2023-08-13	3405576	何春肖	女	55Y	眶骨骨折	上颌骨骨折;颧弓骨折;2型糖尿病	治愈	冯旺强	董志章	宋广伟	颧骨骨折切开复位内固定术;上颌骨骨折切开复位内固定术;眶骨骨折切开复位内固定术
363	C03眼科口腔	2023-08-03	2023-08-14	3406092	厉小华	女	73Y	内踝骨折	腓骨骨折;踝关节积液;肺部感染;支气管扩张(症);下肢静脉血栓形成;膝关节退行性病变;室性自搏	好转	翁益民	翁益民	项光恒
364	C03眼科口腔	2023-08-06	2023-08-14	3406166	王旺生	男	25Y	上颌骨骨折		治愈	聂鑫	肖进	于健涛	上颌骨骨折切开复位内固定术
365	C03眼科口腔	2023-08-13	2023-08-14	3406169	刘翠丽	女	33Y	眶骨骨折		治愈	韩晓辉	杨顺海	宋广伟	眶骨骨折切开复位内固定术
366	C03眼科口腔	2023-08-08	2023-08-15	3406609	李迪晨	男	8Y	取除骨折内固定装置		其他	聂鑫	聂鑫	于健涛	下颌骨内固定装置取出术
367	C03眼科口腔	2023-08-08	2023-08-16	3406975	曾海鹏	男	16Y	取除骨折内固定装置		其他	聂鑫	聂鑫	于健涛	下颌骨内固定装置取出术
368	C03眼科口腔	2023-08-12	2023-08-16	3407017	蒋书全	男	47Y	眶骨骨折	颧弓骨折	治愈	韩晓辉	董志章	宋广伟	颧骨骨折切开复位内固定术;眶骨骨折切开复位内固定术
369	C03眼科口腔	2023-08-14	2023-08-17	3407468	谢宇菲	女	31Y	取除骨折内固定装置	脊柱侧弯	其他	翁益民	翁益民	项光恒	尺骨内固定装置去除术
370	C03眼科口腔	2023-08-11	2023-08-17	3407475	蒋大宋	男	53Y	锁骨骨折	肝血管瘤;肝囊肿	治愈	石成弟	石成弟	卢迪	锁骨骨折切开复位钢板内固定术
371	C03眼科口腔	2023-08-17	2023-08-18	3407874	余隆隆	男	27Y	取除骨折内固定装置		其他	冯旺强	杨顺海	宋广伟	去除面骨内固定装置
372	C03眼科口腔	2023-08-17	2023-08-18	3407876	万寿云	男	60Y	取除骨折内固定装置	上睑下垂;白内障	其他	韩晓辉	董志章	骆伊丽	去除面骨内固定装置
373	C03眼科口腔	2023-08-11	2023-08-19	3408104	高平	男	42Y	鹰嘴骨折	桡骨下端骨折;前臂开放性伤口;膝开放性伤口	好转	陈龙	陈龙	王特	皮肤和皮下组织非切除性清创;关节软骨修复术;尺骨骨折切开复位钢板内固定术
374	C03眼科口腔	2023-08-09	2023-08-19	3408160	周秀英	女	71Y	肱骨远端多发性骨折	桡侧副韧带断裂	治愈	翁益民	翁益民	项光恒	肘关节韧带修补术;肱骨骨折切开复位螺钉内固定术
375	C03眼科口腔	2023-08-14	2023-08-19	3408189	郑送莲	女	51Y	取除骨折内固定装置	2型糖尿病;脂肪肝	其他	翁益民	翁益民	项光恒	胫骨内固定装置去除术
376	C03眼科口腔	2023-08-12	2023-08-19	3408299	林根花	女	67Y	胸椎骨折	腰椎前移;胸椎退行性病变;后天性肾囊肿;肝回声不均;肝囊肿;心脏瓣膜病;施莫尔结;肺的其他疾患	好转	赵友明	赵友明	方文来	胸椎骨折球囊扩张成形术
377	C03眼科口腔	2023-08-16	2023-08-19	3408377	谢美平	女	67Y	跟骨骨折	足舟状骨骨折;髌骨骨折;脂肪肝;下肢动脉粥样硬化	好转	王振文	水小龙	徐宏威
378	C03眼科口腔	2023-08-12	2023-08-20	3408628	郑国荣	男	15Y	桡骨远端骨折		好转	赵友明	赵友明	方文来	桡骨骨折切开复位钢板内固定术
379	C03眼科口腔	2023-08-08	2023-08-20	3408671	董时书	男	64Y	跟骨骨折	距骨骨折;前列腺结石	治愈	黄义星	黄义星	张儒	跟骨人工骨植骨术;跟骨骨折切开复位钢板内固定术
380	C03眼科口腔	2023-08-19	2023-08-21	3409094	吴梓诚	男	9Y	取除骨折内固定装置		其他	赵友明	赵友明	方文来	胫骨内固定装置去除术
381	C03眼科口腔	2023-08-08	2023-08-21	3409255	张满良	男	42Y	胫骨下端骨折	头皮血肿	治愈	黄义星	黄义星	张儒	胫骨人工骨植骨术;胫骨骨折切开复位钢板内固定术
382	C03眼科口腔	2023-08-08	2023-08-22	3409677	池映清	女	30Y	髁突骨折		治愈	聂鑫	肖进	于健涛	髁突骨折切开复位内固定术
383	C03眼科口腔	2023-08-16	2023-08-22	3409733	陈贤祝	男	24Y	尺骨上端骨折	肘关节后脱位;桡骨上端骨折	好转	陈龙	陈龙	王特	肘关节韧带修补术;肘关节脱位切开复位内固定术;尺骨骨折切开复位螺钉内固定术
384	C03眼科口腔	2023-08-22	2023-08-23	3410432	周宇婷	女	43Y	取除骨折内固定装置		其他	陈龙	陈龙	王特	桡骨内固定装置去除术;尺骨内固定装置去除术
385	C03眼科口腔	2023-08-16	2023-08-24	3410597	杨佳慧	女	22Y	下颌骨骨折		治愈	聂鑫	聂鑫	于健涛	下颌骨骨折切开复位内固定术
386	C03眼科口腔	2023-08-12	2023-08-24	3410601	张菊芳	女	52Y	眶骨骨折	颧弓骨折;上颌骨骨折;视神经损伤	治愈	韩晓辉	董志章	宋广伟	颧骨骨折切开复位内固定术;上颌骨骨折切开复位内固定术;眶骨骨折切开复位内固定术;鼻镜检查;面骨骨折碎片取出术;视神经减压术
387	C03眼科口腔	2023-08-14	2023-08-26	3411430	明小合	男	39Y	眼撕裂伤和破裂伴有眼内组织脱出或缺失	特发性(原发性)高血压;眼睑裂伤;眶骨骨折	治愈	冯旺强	杨顺海	宋广伟	眼睑裂伤缝合术;结膜囊成形术;去除眼内容物同时将植入物植入巩膜壳;眶骨骨折切开复位内固定术
388	C03眼科口腔	2023-08-20	2023-08-26	3411471	郑先平	男	65Y	胸椎骨折	腰骶椎弓骨折;腰椎间盘突出;糜烂性胃炎;下肢动脉粥样硬化;脂肪肝;心脏瓣膜病;下肢静脉曲张	好转	赵友明	方文来	方文来	胸椎骨折球囊扩张成形术
389	C03眼科口腔	2023-08-18	2023-08-27	3411783	郑小莲	女	74Y	尺骨骨折	脂肪肝;后天性肾囊肿;下肢动脉粥样硬化;颈动脉硬化;先天性肺动脉瓣狭窄;先天性二尖瓣关闭不全;骨折不连接\[假关节\];特发性(原发性)高血压	好转	赵友明	方文来	方文来	尺骨内固定装置去除术;尺骨骨折切开复位钢板内固定术;尺骨人工骨植骨术
390	C03眼科口腔	2023-08-16	2023-08-27	3411786	谢碎香	女	61Y	尺骨茎突骨折伴桡骨远端骨折	2型糖尿病	治愈	翁益民	翁益民	项光恒	桡骨人工骨植骨术;桡骨骨折切开复位钢板内固定术
391	C03眼科口腔	2023-08-15	2023-08-28	3412249	吴剑锋	男	35Y	胫腓骨干骨折	脂肪肝;胆囊息肉;胆囊胆固醇沉着症;肾结石	治愈	翁益民	翁益民	项光恒	腓骨骨折闭合复位髓内针内固定术;胫骨骨折切开复位钢板内固定术
392	C03眼科口腔	2023-08-19	2023-08-28	3412286	郑梁	男	28Y	上颌骨骨折		治愈	聂鑫	聂鑫	于健涛	上颌骨骨折切开复位内固定术
393	C03眼科口腔	2023-08-15	2023-08-28	3412439	陈雪华	女	75Y	胫骨干骨折	跖骨骨折;诊断性影像检查的异常所见，其他特指身体结构的;腰椎间盘突出;肝囊肿;后天性肾囊肿;肾结石;胆囊息肉;脊柱侧弯	好转	翁益民	翁益民	项光恒	胫骨骨折切开复位钢板内固定术
394	C03眼科口腔	2023-08-27	2023-08-28	3412462	邵秀莲	女	73Y	取除骨折内固定装置	白内障;特发性(原发性)高血压	其他	韩晓辉	杨顺海	宋广伟	去除面骨内固定装置
395	C03眼科口腔	2023-08-26	2023-08-30	3413446	张时程	男	67Y	腕和手指伸肌和肌腱损伤	肝囊肿;后天性肾囊肿;前列腺结石;主动脉(瓣)关闭不全;冠状动脉粥样硬化;肺大疱;肺的其他疾患;指骨骨折	治愈	闫合德	林大木	周宗伟	伸指肌腱缝合术;指骨骨折切开复位钢针内固定术;指间关节固定术
396	C03眼科口腔	2023-08-25	2023-08-31	3413660	李香招	女	62Y	胸椎骨折	腰椎间盘突出;慢性乙型病毒性肝炎;下肢动脉粥样硬化;后天性肾囊肿;心脏瓣膜病;肺间质纤维化	好转	赵友明	方文来	方文来	胸椎骨折球囊扩张成形术
397	C03眼科口腔	2023-08-25	2023-08-31	3413764	张春雪	女	51Y	锁骨骨折	脂肪肝	治愈	孔建中	陈墨川	陈墨川	锁骨人工骨植骨术;锁骨骨折切开复位钢板内固定术
398	C03眼科口腔	2023-08-27	2023-09-02	3414145	蔡春兰	女	83Y	尺骨茎突骨折伴桡骨远端骨折	下肢动脉粥样硬化;脂肪肝	好转	黄俊武	余贤斌	郑文浩	桡骨骨折切开复位钢板内固定术
399	C03眼科口腔	2023-08-28	2023-09-02	3414432	蔡素丽	女	55Y	取除骨折内固定装置	后天性肾囊肿;脂肪肝	其他	赵友明	柯陈荣	219048	桡骨内固定装置去除术
400	C03眼科口腔	2023-08-26	2023-09-02	3414437	胡永宣	男	61Y	锁骨骨折	乙型病毒性肝炎	治愈	杨雷	周一飞	白炳力	锁骨骨折切开复位螺钉内固定术
401	C03眼科口腔	2023-08-28	2023-09-02	3414464	刘秋云	女	54Y	眶骨骨折	上颌骨骨折;颧弓骨折	治愈	韩晓辉	杨顺海	宋广伟	上颌骨骨折切开复位内固定术;眶骨骨折切开复位内固定术
402	C03眼科口腔	2023-08-19	2023-09-02	3414475	刘日敏	男	34Y	下颌骨骨折		治愈	聂鑫	聂鑫	于健涛	筋膜成形术;颅颌牵引;牙龈成形术;下颌骨骨折切开复位内固定术
403	C03眼科口腔	2023-08-26	2023-09-02	3414549	郑云华	男	72Y	桡骨远端骨折	骨质疏松，其他的;肝钙化灶;肾结石;前列腺增生;前列腺结石;前列腺囊肿	好转	陈华	孙辽军	蔡乐益	桡骨骨折闭合复位螺钉内固定术
404	C03眼科口腔	2023-08-27	2023-09-03	3414799	倪嘉南	男	23Y	距骨骨折	肌腱和肌肉损伤;胆囊结石	好转	翁益民	翁益民	王特
405	C03眼科口腔	2023-08-29	2023-09-03	3414810	刘国内	男	62Y	眼撕裂伤和破裂伴有眼内组织脱出或缺失	前房积血;重度视力缺损，单眼;眶骨骨折	治愈	冯旺强	董志章	宋广伟	眼球破裂修补术
406	C03眼科口腔	2023-08-24	2023-09-03	3414860	胡林平	女	52Y	髌骨骨折	高脂血症;特发性(原发性)高血压;甲状腺术后;抑郁发作	好转	翁益民	翁益民	王特	髌骨骨折切开复位张力带钢丝内固定术
407	C03眼科口腔	2023-08-27	2023-09-03	3414923	周光桥	男	27Y	腕舟骨骨折		治愈	陈龙	应晓洲	应晓洲	腕骨骨折闭合复位螺钉内固定术
408	C03眼科口腔	2023-09-03	2023-09-04	3415277	韩丽	女	50Y	取除骨折内固定装置		其他	韩晓辉	杨顺海	宋广伟	去除面骨内固定装置
409	C03眼科口腔	2023-09-03	2023-09-04	3415500	陶竹容	女	37Y	鼻骨骨折		治愈	高金建	高金建	潘豪来	鼻镜检查;鼻骨折闭合性复位术
410	C03眼科口腔	2023-08-26	2023-09-05	3415720	董秋蕊	女	45Y	跟骨骨折		好转	翁益民	翁益民	王特	跟骨骨折闭合复位螺钉内固定术
411	C03眼科口腔	2023-08-30	2023-09-05	3415773	吴荣盛	男	56Y	取除骨折内固定装置	肝回声不均;前列腺结石;肾结石	其他	陈华	孙辽军	蔡乐益	桡骨内固定装置去除术
412	C03眼科口腔	2023-09-02	2023-09-07	3416475	翁根意	女	80Y	骨质疏松伴有病理性骨折	腰椎间盘突出;胸椎退行性病变;腰椎侧弯;陈旧性腰椎骨折	治愈	黄其杉	黄其杉	朱思品	胸椎骨折球囊扩张成形术
413	C03眼科口腔	2023-08-31	2023-09-07	3416697	麻伟英	女	81Y	肱骨近端骨折	桡骨远端骨折;高血压;后天性肾囊肿;脂肪肝;2型糖尿病	治愈	陈龙	应晓洲	应晓洲	肱骨骨折切开复位钢板内固定术;肩袖修补术
414	C03眼科口腔	2023-08-28	2023-09-09	3417150	姜婷	女	24Y	下颌骨骨折		治愈	聂鑫	肖进	于健涛	下颌骨骨折切开复位内固定术;颌间结扎
415	C03眼科口腔	2023-09-01	2023-09-09	3417223	陈锦凡	男	26Y	颧弓骨折		治愈	聂鑫	肖进	于健涛	颧骨骨折切开复位内固定术
416	C03眼科口腔	2023-09-04	2023-09-09	3417344	金爱平	女	64Y	取除骨折内固定装置	高血压	其他	翁益民	翁益民	王特	踝关节内固定装置去除术
417	C03眼科口腔	2023-09-04	2023-09-09	3417399	陈超	男	25Y	取除骨折内固定装置		其他	翁益民	翁益民	王特	踝关节内固定装置去除术
418	C03眼科口腔	2023-09-02	2023-09-10	3417696	苏良秒	男	40Y	跟骨骨折	前列腺结石;骰骨骨折;脂肪肝;胆囊息肉	治愈	洪建军	卢晓郎	219049	跟骨骨折切开复位钢板内固定术;跟骨骨折闭合复位螺钉内固定术;跟骨人工骨植骨术
419	C03眼科口腔	2023-08-28	2023-09-10	3417777	项有众	男	68Y	髌骨骨折	特发性(原发性)高血压;后天性肾囊肿;糜烂性胃炎	好转	翁益民	翁益民	王特	髌骨骨折切开复位张力带钢丝内固定术
420	C03眼科口腔	2023-09-10	2023-09-11	3418112	金美武	女	38Y	眶骨骨折		治愈	蔡剑秋	夏哲人	张煜	眶骨骨折切开复位内固定术
421	C03眼科口腔	2023-08-30	2023-09-11	3418154	陈仁邦	男	54Y	腰椎骨折	耻骨骨折;腰椎退行性病变;前列腺增生;腰椎间盘突出;下肢动脉粥样硬化;心功能不全;前列腺结石;腰椎椎管狭窄	治愈	赵友明	柯陈荣	219048	脊椎骨折切开复位内固定术
422	C03眼科口腔	2023-09-01	2023-09-11	3418193	叶宝玉	男	63Y	胫骨干骨折	肺的其他疾患;踝关节骨折;特发性(原发性)高血压;踝关节积液;胆囊息肉;前列腺结石	治愈	赵友明	柯陈荣	219048	石膏托固定术;胫骨人工骨植骨术;踝关节骨折切开复位钢板内固定术;胫骨骨折切开复位钢板内固定术
423	C03眼科口腔	2023-09-02	2023-09-11	3418221	王彩领	女	63Y	胫骨平台骨折	膝半月板撕裂;膝关节十字韧带损伤;头皮血肿;特发性(原发性)高血压;肝胆管结石;肾结石;老年性心脏瓣膜病;下肢静脉血栓形成;肝钙化灶;腰椎退行性病变;肝胆管扩张;脑萎缩;膝关节副韧带扭伤	治愈	赵友明	柯陈荣	219048	股骨骨折切开复位螺钉内固定术;胫骨植骨术;关节镜膝关节副韧带修补术;胫骨骨折切开复位钢板内固定术
424	C03眼科口腔	2023-09-10	2023-09-11	3418318	兰仁楷	男	46Y	眶骨骨折		治愈	韩晓辉	杨顺海	宋广伟	眶骨骨折切开复位内固定术
425	C03眼科口腔	2023-09-02	2023-09-12	3418709	陈光杰	男	12Y	股骨髁上骨折		治愈	陈龙	应晓洲	应晓洲	股骨骨折闭合复位钢针内固定术
426	C03眼科口腔	2023-09-06	2023-09-14	3419499	刘碎宽	男	49Y	胫骨平台骨折	肝囊肿;前列腺结石;指骨骨折;多处损伤	好转	陈华	孙辽军	蔡乐益	关节软骨修复术;胫骨骨折切开复位钢板内固定术;胫骨人工骨植骨术
427	C03眼科口腔	2023-09-08	2023-09-16	3419919	王朝富	男	35Y	盖氏骨折	脂肪肝;后天性肾囊肿	治愈	陈龙	应晓洲	应晓洲	桡骨人工骨植骨术;桡骨骨折切开复位钢板内固定术
428	C03眼科口腔	2023-09-05	2023-09-16	3419989	周新华	男	52Y	跟骨骨折	肝囊肿	好转	孙辽军	孙辽军	蔡乐益	跟骨骨折切开复位钢板内固定术;跟骨人工骨植骨术;关节软骨修复术
429	C03眼科口腔	2023-09-09	2023-09-16	3419998	吴曰景	男	55Y	眶骨骨折	膝关节后十字韧带部分断裂;双侧感音神经性听觉丧失;上颌骨骨折;硬膜外血肿;头皮血肿;陈旧性肋骨骨折;孤立性肺结节;肺大疱;肾积水伴肾结石;甲状腺钙化;颈椎间盘突出;甲状腺结节	治愈	冯旺强	杨顺海	宋广伟	上颌骨骨折切开复位内固定术;眶骨骨折切开复位内固定术
430	C03眼科口腔	2023-09-07	2023-09-16	3420059	陈香岭	女	63Y	尺骨骨折	老年性心脏病	治愈	赵友明	柯陈荣	219048	尺骨人工骨植骨术;尺骨骨折切开复位钢板内固定术
431	C03眼科口腔	2023-08-28	2023-09-16	3420127	李发兴	男	32Y	玻璃体积血	前房积血;眶骨骨折;外伤性白内障;眼撕裂伤和破裂伴有眼内组织脱出或缺失;视网膜脱离	治愈	冯旺强	杨顺海	骆伊丽	眶骨骨折切开复位内固定术;前房成形术;结膜裂伤修补术;眼球破裂修补术;玻璃体硅油置入术，用于视网膜再附着;视网膜病损激光凝固术;视网膜脱离激光治疗术;白内障切割吸出术;后入路玻璃体切割术
432	C03眼科口腔	2023-09-04	2023-09-17	3420357	廖诗辉	男	30Y	髁突骨折	下颌骨体骨折	治愈	聂鑫	肖进	于健涛	下颌骨骨折切开复位内固定术;髁突骨折切开复位内固定术
433	C03眼科口腔	2023-09-02	2023-09-17	3420364	叶升友	男	58Y	胫腓骨闭合性骨折	肾结石;下肢动脉粥样硬化;特发性(原发性)高血压;2型糖尿病;脂肪肝	治愈	陈龙	应晓洲	应晓洲	腓骨骨折切开复位钢板内固定术;胫骨骨折切开复位钢板内固定术
434	C03眼科口腔	2023-08-31	2023-09-18	3420959	赵剑威	男	32Y	Pilon骨折	脂肪肝;前列腺结石	治愈	赵友明	柯陈荣	219048	胫骨人工骨植骨术;腓骨骨折切开复位钢板内固定术;胫骨骨折切开复位钢板内固定术
435	C03眼科口腔	2023-09-17	2023-09-18	3420963	廖仕浩	男	18Y	取除骨折内固定装置		其他	冯旺强	杨顺海	宋广伟	去除面骨内固定装置
436	C03眼科口腔	2023-09-17	2023-09-18	3421053	叶蒙蒙	女	31Y	眶骨骨折		治愈	冯旺强	杨顺海	宋广伟	上颌骨骨折切开复位内固定术;眶骨骨折切开复位内固定术
437	C03眼科口腔	2023-09-05	2023-09-19	3421143	钱娇凤	女	63Y	踝关节骨折连接不正	2型糖尿病;皮下结节	治愈	赵友明	柯陈荣	219048	石膏托固定术;腓骨人工骨植骨术;胫骨人工骨植骨术;关节软骨修复术;踝关节骨折切开复位钢板内固定术
438	C03眼科口腔	2023-09-03	2023-09-19	3421214	刘仙花	女	44Y	尺骨桡骨闭合性骨折	白内障;三角骨骨折;手术后状态，其他特指的;翼状胬肉	治愈	赵友明	柯陈荣	219048	翼状胬肉切除伴结膜移植术;皮肤缝合术;创面封闭式负压引流术（VSD);皮肤伤口切除性清创术;桡骨骨折切开复位钢板内固定术
439	C03眼科口腔	2023-09-17	2023-09-19	3421284	郭浩	男	31Y	眶骨骨折	白内障	治愈	冯旺强	杨顺海	宋广伟	眶骨骨折切开复位内固定术
440	C03眼科口腔	2023-09-16	2023-09-19	3421371	陈林芽	女	43Y	指骨骨折	在腕和手水平的肌肉和肌腱的损伤	治愈	赵友明	柯陈荣	219048	石膏绷带固定;屈指肌腱缝合术;指骨骨折切开复位螺钉内固定术
441	C03眼科口腔	2023-09-11	2023-09-20	3421992	马永光	男	50Y	眶骨骨折	视神经损伤	治愈	冯旺强	杨顺海	宋广伟	眶骨骨折切开复位内固定术
442	C03眼科口腔	2023-09-05	2023-09-23	3422796	徐菊素	女	56Y	胫骨干骨折伴腓骨骨折	特发性(原发性)高血压;脂肪肝;清创术后;肝囊肿	治愈	赵友明	柯陈荣	219048	腓骨骨折切开复位钢板内固定术;胫骨人工骨植骨术;胫骨骨折切开复位钢板内固定术;石膏托固定术
443	C03眼科口腔	2023-09-11	2023-09-23	3422927	金学囡	男	73Y	面骨骨折	高血压;高血压性心脏病	治愈	聂鑫	聂鑫	于健涛	鼻出血电凝术;面骨骨折切开复位内固定术
444	C03眼科口腔	2023-09-11	2023-09-24	3423410	汪小东	男	31Y	胫骨骨髓炎	取除骨折内固定装置	治愈	陈龙	应晓洲	应晓洲	胫骨人工骨植骨术;胫骨内固定装置去除术;胫骨病损切除术
445	C03眼科口腔	2023-09-10	2023-09-24	3423569	孙子垚	男	22Y	上颌骨骨折	眶骨骨折;颧弓骨折	治愈	聂鑫	肖进	于健涛	眶骨骨折切开复位内固定术;上颌骨骨折切开复位内固定术
446	C03眼科口腔	2023-09-18	2023-09-25	3423873	缪光亮	男	52Y	肱骨干骨折	腰椎退行性病变;脂肪肝;前列腺增生	治愈	王振文	水小龙	徐宏威	肱骨骨折切开复位钢板内固定术
447	C03眼科口腔	2023-09-16	2023-09-25	3423986	李志皆	男	53Y	胫骨骨折	下肢静脉功能不全;腓骨骨折;老年性心脏病	治愈	赵友明	柯陈荣	219048	胫骨人工骨植骨术;胫骨骨折切开复位钢板内固定术;石膏托固定术
448	C03眼科口腔	2023-09-19	2023-09-26	3424217	郑建浩	男	16Y	股骨颈骨折		治愈	洪建军	卢晓郎	219049	股骨骨折闭合复位螺钉内固定术
449	C03眼科口腔	2023-09-15	2023-09-27	3424833	林秀玉	女	79Y	锁骨骨折	肋骨骨折	好转	翁益民	翁益民	王特	锁骨人工骨植骨术;锁骨骨折切开复位钢板内固定术
450	C03眼科口腔	2023-09-20	2023-09-28	3425240	周金平	男	35Y	肘关节骨折	脂肪肝;肾结石;前列腺结石	好转	翁益民	翁益民	王特	肘关节X线检查;肘关节脱位手法整复术;石膏托固定术
451	C03眼科口腔	2023-09-15	2023-09-28	3425250	方传苗	男	46Y	胫腓骨干骨折		好转	翁益民	王特	王特	胫骨骨折切开复位钢板内固定术;腓骨骨折闭合复位髓内针内固定术;胫骨人工骨植骨术
452	C03眼科口腔	2023-09-26	2023-09-28	3425443	张煜	男	28Y	取除骨折内固定装置		其他	赵友明	柯陈荣	219048	桡骨内固定装置去除术
453	C03眼科口腔	2023-09-19	2023-09-29	3425747	温兴蓬	男	31Y	胫腓骨下端骨折	前列腺结石;脂肪肝	治愈	洪建军	洪建军	219049	胫骨人工骨植骨术;腓骨骨折切开复位钢板内固定术;胫骨骨折切开复位钢板内固定术
454	C03眼科口腔	2023-09-25	2023-09-30	3426308	陈林	男	76Y	取除骨折内固定装置	特发性(原发性)高血压;糖尿病	其他	翁益民	翁益民	王特	锁骨内固定装置去除术
455	C03眼科口腔	2023-09-17	2023-09-30	3426318	吴思雅	女	8Y	下颌骨骨折		治愈	聂鑫	聂鑫	于健涛	下颌骨骨折切开复位内固定术
456	C03眼科口腔	2023-09-21	2023-09-30	3426335	陈宝领	女	66Y	桡骨远端骨折	特发性(原发性)高血压;尺骨茎突骨折;腕骨骨折;脂肪肝;老年性心脏病	治愈	赵友明	柯陈荣	219048	石膏托固定术;关节软骨修复术;桡骨骨折切开复位钢板内固定术
457	C03眼科口腔	2023-09-22	2023-09-30	3426427	沈世多	男	52Y	桡骨远端骨折	肝囊肿;后天性肾囊肿;高血压	治愈	陈龙	应晓洲	应晓洲	桡骨骨折切开复位钢板内固定术
458	C03眼科口腔	2023-09-26	2023-09-30	3426488	张成光	男	54Y	取除骨折内固定装置	高血压;脂肪肝;后天性肾囊肿;前列腺结石	其他	陈华	孙辽军	蔡乐益	跟骨内固定物取出术
459	C03眼科口腔	2023-09-27	2023-09-30	3426596	薛春梅	女	51Y	取除骨折内固定装置		其他	陈华	孙辽军	蔡乐益	肱骨内固定装置去除术
460	C03眼科口腔	2023-09-24	2023-10-01	3426739	高金兆	男	57Y	眼撕裂伤不伴有眼内组织脱出或缺失	手部指伸肌损伤;低钾血症;特发性(原发性)高血压;手部浅表异物;前房积血;玻璃体积血;眼内直肌断裂;眶骨骨折;肌腱和肌肉损伤	治愈	郑穗联	陈婕灵	张煜	眼外肌损伤修补术;后入路玻璃体切割术;石膏绷带固定;手部伸肌腱缝合术;手异物的不切开去除;皮肤和皮下组织非切除性清创;眼球破裂修补术
461	C03眼科口腔	2023-09-25	2023-10-01	3426870	孙忠平	男	56Y	锁骨多发性骨折		治愈	翁益民	翁益民	王特	锁骨骨折切开复位钢板内固定术
462	C03眼科口腔	2023-09-22	2023-10-02	3427127	周安义	男	76Y	多发性面骨骨折	高血压	治愈	聂鑫	于健涛	于健涛	眼睑病损切除术;上颌骨骨折切开复位内固定术
463	C03眼科口腔	2023-09-28	2023-10-04	3427601	单涵宇	男	11M	下颌骨骨折		治愈	聂鑫	聂鑫	于健涛	下颌骨骨折切开复位内固定术
464	C03眼科口腔	2023-07-29	2023-10-04	3427758	胡显峰	男	51Y	骨折内固定物植入感染		治愈	陈华	孙辽军	蔡乐益	创面封闭式负压引流术（VSD);皮肤和皮下组织非切除性清创;胫骨内固定装置去除术;皮肤和皮下坏死组织切除清创术
465	C03眼科口腔	2023-09-26	2023-10-07	3428304	林玲	女	27Y	取除骨折内固定装置		其他	聂鑫	徐兴侨	徐兴侨	下颌骨内固定装置取出术
466	C03眼科口腔	2023-09-24	2023-10-08	3428744	符亮	男	28Y	骨折不连接\[假关节\]		治愈	王振文	水小龙	徐宏威	髂骨切除术用作移植物;股骨植骨术
467	C03眼科口腔	2023-09-22	2023-10-08	3428839	杨胜祥	男	48Y	股骨骨折	桡骨远端骨折;糖尿病	治愈	陈龙	应晓洲	应晓洲	股骨骨折闭合复位螺钉内固定术
468	C03眼科口腔	2023-09-27	2023-10-09	3428995	王玉红	女	64Y	取除骨折内固定装置	肺部感染;脂肪肝	其他	陈华	孙辽军	蔡乐益	腓骨内固定装置去除术;股骨内固定装置去除术;胫骨内固定装置去除术
469	C03眼科口腔	2023-10-06	2023-10-10	3429590	周祖航	男	6Y	下颌骨骨折		未愈	聂鑫	徐兴侨	徐兴侨
470	C03眼科口腔	2023-10-03	2023-10-11	3429894	郭云青	男	49Y	视神经损伤	眶骨骨折	好转	韩晓辉	杨顺海	骆伊丽
471	C03眼科口腔	2023-10-09	2023-10-12	3430291	方玲珠	女	45Y	取除骨折内固定装置	脾大;子宫平滑肌瘤;子宫内膜息肉;肝血管瘤;腹腔积液;陈旧性桡骨骨折;乙型病毒性肝炎;脂肪肝;乳房纤维囊性乳腺病;甲状腺结节	其他	赵友明	赵友明	219048	拔甲术;跖骨内固定装置去除术
472	C03眼科口腔	2023-10-09	2023-10-14	3431023	洪素萍	女	53Y	取除骨折内固定装置	老年性心脏瓣膜病;孤立性肺结节;肺部感染	其他	赵友明	赵友明	219048	髌骨内固定装置去除术
473	C03眼科口腔	2023-10-09	2023-10-14	3431040	赵紫娟	女	33Y	取除骨折内固定装置	股骨头缺血性坏死	其他	赵友明	柯陈荣	219048	股骨内固定装置去除术
474	C03眼科口腔	2023-10-11	2023-10-15	3431557	温雪铜	女	43Y	取除骨折内固定装置	脂肪肝	其他	翁益民	翁益民	王特	胫骨和腓骨置入装置去除
475	C03眼科口腔	2023-10-09	2023-10-15	3431567	陈黄兰	女	61Y	踝关节骨折	心房颤动;脂肪肝	好转	翁益民	翁益民	王特	腓骨人工骨植骨术;踝关节骨折切开复位钢板内固定术
476	C03眼科口腔	2023-10-10	2023-10-16	3432091	吴胜敏	男	62Y	胫骨平台骨折	膝内侧半月板撕裂;外侧半月板损伤;膝关节十字韧带损伤;高血压;糖尿病;肺大疱	治愈	杨雷	周一飞	白炳力	胫骨骨折切开复位钢板内固定术;胫骨植骨术
477	C03眼科口腔	2023-10-15	2023-10-16	3432311	胡秀琴	女	56Y	取除骨折内固定装置		其他	冯旺强	杨顺海	林达	去除面骨内固定装置
478	C03眼科口腔	2023-10-15	2023-10-16	3432374	计超豪	男	37Y	取除骨折内固定装置		其他	冯旺强	杨顺海	宋广伟	去除面骨内固定装置
479	C03眼科口腔	2023-10-11	2023-10-17	3432629	叶洪生	男	59Y	取除骨折内固定装置		其他	陈华	孙辽军	蔡乐益	髌骨内固定装置去除术
480	C03眼科口腔	2023-10-11	2023-10-17	3432711	邱银林	女	77Y	腰椎骨折	高血压;2型糖尿病	治愈	黄其杉	林仲可	朱思品	经皮椎体球囊扩张成形术
481	C03眼科口腔	2023-10-02	2023-10-17	3432772	高元辉	男	60Y	眼撕裂伤和破裂伴有眼内组织脱出或缺失	脉络膜脱离;视网膜脱离;眼睑裂伤;眶骨骨折;白内障;肩胛骨骨折;玻璃体积血;外伤性白内障;创伤性虹膜根部离断	治愈	韩晓辉	杨顺海	宋广伟	眼睑裂伤缝合术;眦成形术;眼球破裂修补术;后入路玻璃体切割术;皮肤和皮下坏死组织切除清创术;肩胛骨钢针内固定术
482	C03眼科口腔	2023-10-15	2023-10-17	3432828	彭郑木	男	61Y	眶内异物	眼挫伤;眼睑裂伤;眶骨骨折;泪小管断裂;面部裂伤;特发性(原发性)高血压	治愈	冯旺强	杨顺海	骆伊丽	结膜裂伤修补术;眶切开异物取出术
483	C03眼科口腔	2023-10-07	2023-10-18	3433114	夏永红	男	41Y	肱骨干骨折	脂肪肝;肝回声不均	好转	翁益民	翁益民	王特	肱骨骨折切开复位钢板内固定术
484	C03眼科口腔	2023-10-11	2023-10-18	3433139	林雪兰	女	66Y	股骨颈骨折	脊椎松解;胆囊结石	好转	陈华	孙辽军	蔡乐益	股骨骨折闭合复位螺钉内固定术
485	C03眼科口腔	2023-10-11	2023-10-19	3433698	林胜义	男	57Y	取除骨折内固定装置	脂肪肝;后天性肾囊肿;前列腺增生	其他	翁益民	翁益民	王特	胫骨内固定装置去除术
486	C03眼科口腔	2023-10-17	2023-10-21	3434211	李中村	男	53Y	取除骨折内固定装置		其他	王振文	余洋	徐宏威	踝关节内固定装置去除术
487	C03眼科口腔	2023-10-17	2023-10-21	3434220	张毅	男	30Y	取除骨折内固定装置		其他	赵友明	柯陈荣	219048	锁骨内固定装置去除术
488	C03眼科口腔	2023-10-17	2023-10-21	3434274	赵子平	男	60Y	取除骨折内固定装置	慢性胃炎;孤立性肺结节;老年性心脏瓣膜病;肾结石;前列腺结石	其他	赵友明	柯陈荣	219048	胫骨内固定装置去除术
489	C03眼科口腔	2023-10-18	2023-10-21	3434278	祁欢欢	男	31Y	取除骨折内固定装置		其他	王振文	水小龙	徐宏威	跖骨内固定装置去除术
490	C03眼科口腔	2023-10-09	2023-10-21	3434502	江志雄	男	14Y	眶骨骨折	上颌骨骨折;视神经损伤;变应性鼻炎;颧弓骨折	治愈	冯旺强	杨顺海	骆伊丽	上颌骨骨折切开复位内固定术;眶骨骨折切开复位内固定术;视神经减压术;面骨骨折碎片取出术;鼻内窥镜下多个鼻窦开窗术
491	C03眼科口腔	2023-10-17	2023-10-21	3434519	叶圣聪	男	49Y	取除骨折内固定装置	乙型病毒性肝炎;肝病;多发性肝囊肿;前列腺增生	其他	王振文	水小龙	徐宏威	肱骨内固定装置去除术
492	C03眼科口腔	2023-10-14	2023-10-22	3434795	周玉花	女	51Y	跗跖关节骨折脱位[Lisfranc骨折脱位]	手术后状态，其他特指的;胆囊结石;肾结石;肾超声检查异常	治愈	赵友明	柯陈荣	219048	足关节囊缝合术;跖骨骨折切开复位钢针内固定术;石膏托固定术;关节软骨修复术
493	C03眼科口腔	2023-10-19	2023-10-22	3434966	黄银标	男	53Y	取除骨折内固定装置	高血压;脂肪肝;心功能不全;前列腺增生	其他	王振文	余洋	徐宏威	髌骨内固定装置去除术
494	C03眼科口腔	2023-10-08	2023-10-22	3434998	罗启仁	男	28Y	面骨骨折		治愈	韩晓辉	杨顺海	宋广伟	眶骨骨折切开复位内固定术
495	C03眼科口腔	2023-10-11	2023-10-23	3435395	张云	女	26Y	外踝骨折	跖骨骨折;骨软骨炎;膝外侧半月板损伤	治愈	翁益民	翁益民	王特	跖骨骨折切开复位钢板内固定术;踝关节骨折切开复位钢板内固定术
496	C03眼科口腔	2023-10-22	2023-10-23	3435406	陈小军	男	37Y	取除骨折内固定装置		其他	冯旺强	杨顺海	宋广伟	去除面骨内固定装置
497	C03眼科口腔	2023-10-02	2023-10-23	3435410	李文兰	女	33Y	胸骨骨折	上颌骨骨折;颞骨骨折;面部软组织挫伤;胆囊息肉;牙震荡	治愈	聂鑫	聂鑫	于健涛	上颌骨骨折切开复位内固定术;胸椎骨折切开复位内固定术
498	C03眼科口腔	2023-10-12	2023-10-25	3436320	冷满龙	男	45Y	眼撕裂伤和破裂伴有眼内组织脱出或缺失	眶骨骨折;结膜撕裂伤;玻璃体积血;脉络膜脱离;视网膜脱离	治愈	冯旺强	韩晓辉	宋广伟	后入路玻璃体切割术;前房冲洗术;前房成形术;结膜裂伤修补术;眼球破裂修补术
499	C03眼科口腔	2023-10-21	2023-10-25	3436362	俞日田	男	55Y	面骨骨折	骨折术后;高血压;脂肪肝;前列腺增生	治愈	冯旺强	杨顺海	宋广伟	眶骨骨折切开复位内固定术
500	C03眼科口腔	2023-10-16	2023-10-25	3436411	邓美胜	男	33Y	眶骨骨折	头部的损伤;肌腱和肌肉损伤	治愈	冯旺强	杨顺海	宋广伟	眶骨骨折切开复位内固定术
501	C03眼科口腔	2023-10-22	2023-10-25	3436412	陶兴飞	男	17Y	面骨骨折		治愈	韩晓辉	杨顺海	宋广伟	面骨骨折切开复位内固定术
502	C03眼科口腔	2023-10-21	2023-10-25	3436428	汤王花	女	53Y	面骨骨折		治愈	韩晓辉	杨顺海	宋广伟	面骨骨折切开复位内固定术
503	C03眼科口腔	2023-10-21	2023-10-26	3436649	苏持家	男	37Y	肩锁关节脱位	肩峰骨折;肝囊肿;后天性肾囊肿	治愈	王振文	余洋	徐宏威	肩锁关节脱位切开复位内固定术
504	C03眼科口腔	2023-10-21	2023-10-26	3436733	张立笋	男	55Y	开放性足损伤	清创术后;跖骨骨折;下肢皮肤缺损	治愈	王振文	水小龙	徐宏威
505	C03眼科口腔	2023-10-21	2023-10-26	3436736	黄晓敏	女	40Y	桡骨下端骨折		治愈	余可和	胡炜	胡炜	桡骨骨折切开复位钢板内固定术
506	C03眼科口腔	2023-10-17	2023-10-28	3437153	张维维	男	34Y	腓骨骨折	在踝和足水平的韧带破裂;脂肪肝;肌肉骨骼系统其他部位诊断性影像检查的异常所见	治愈	陈龙	应晓洲	应晓洲	腓骨人工骨植骨术;踝关节修补术;腓骨骨折切开复位钢板内固定术
507	C03眼科口腔	2023-10-19	2023-10-28	3437194	娄杰元	男	14Y	距骨骨折		治愈	陈龙	应晓洲	应晓洲	距骨骨折切开复位螺钉内固定术
508	C03眼科口腔	2023-10-18	2023-10-28	3437246	蔡国群	男	37Y	上颌骨骨折		治愈	聂鑫	聂鑫	于健涛	上颌骨骨折切开复位内固定术
509	C03眼科口腔	2023-10-26	2023-10-29	3437677	周琴梅	女	51Y	取除骨折内固定装置	脂肪肝	其他	翁益民	翁益民	王特	锁骨内固定装置去除术
510	C03眼科口腔	2023-10-18	2023-10-29	3437727	钟彩花	女	47Y	踝关节骨折	距骨骨折;脂肪肝;肾结石	治愈	赵友明	柯陈荣	219048	关节软骨修复术;石膏托固定术;距骨骨折切开复位钢针内固定术;踝关节骨折切开复位钢针内固定术
511	C03眼科口腔	2023-10-12	2023-10-29	3437739	张云华	男	51Y	胫骨平台骨折	腰椎退行性病变;腰椎间盘突出;肾结石;孤立性肺结节;慢性上颌窦炎;肝血管瘤;前列腺钙化灶;腱鞘囊肿;慢性筛窦炎;腓骨骨折;膝关节积液;股骨病变;膝关节前十字韧带损伤;膝关节内侧副韧带损伤;半月板损伤	治愈	赵友明	柯陈荣	219048	骨空隙骨水泥填充术;胫骨骨折切开复位钢板内固定术;关节软骨修复术
512	C03眼科口腔	2023-10-20	2023-10-29	3437885	黄峰	男	47Y	上颌骨骨折		治愈	聂鑫	聂鑫	于健涛	上颌骨骨折切开复位内固定术
513	C03眼科口腔	2023-10-27	2023-10-29	3437960	纪国崇	男	34Y	眶骨骨折	上颌骨骨折;眼睑裂伤;肩胛骨骨折;2型糖尿病;颧弓骨折	好转	冯旺强	杨顺海	林达
514	C03眼科口腔	2023-10-25	2023-10-30	3438137	胡晓静	女	39Y	取除骨折内固定装置		其他	黄俊武	余贤斌	郑文浩	皮肤瘢痕切除术;肱骨内固定装置去除术
515	C03眼科口腔	2023-10-29	2023-10-30	3438399	陈丽伟	男	43Y	取除骨折内固定装置	骨折术后	其他	韩晓辉	杨顺海	骆伊丽	去除面骨内固定装置
516	C03眼科口腔	2023-10-29	2023-10-30	3438462	张杰	男	27Y	眶骨骨折		治愈	冯旺强	董志章	林达	眶骨骨折切开复位内固定术
517	C03眼科口腔	2023-10-29	2023-10-30	3438487	王玲	女	49Y	取除骨折内固定装置		其他	韩晓辉	杨顺海	宋广伟	去除面骨内固定装置
518	C03眼科口腔	2023-10-25	2023-10-31	3438706	孔宇波	男	17Y	锁骨骨折		好转	陈华	孙辽军	蔡乐益	锁骨人工骨植骨术;锁骨骨折切开复位钢板内固定术
519	C03眼科口腔	2023-10-25	2023-10-31	3438834	唐崇泽	男	15Y	髂骨骨折		治愈	杨雷	周一飞	白炳力	髂骨人工骨植骨术;髂骨骨折切开复位钢针内固定术
520	C03眼科口腔	2023-10-19	2023-10-31	3438924	刘凯	男	15Y	眶骨骨折	头部的损伤;颧弓骨折;上颌窦骨折;跟骨骨折;面部软组织挫伤	治愈	韩晓辉	杨顺海	骆伊丽	颧骨骨折切开复位内固定术;上颌骨骨折切开复位内固定术;眶骨骨折切开复位内固定术
521	C03眼科口腔	2023-10-25	2023-11-01	3439147	王帅邦	男	29Y	跖骨骨折	清创术后;脂肪肝	好转	陈龙	应晓洲	应晓洲	跖骨骨折切开复位钢板内固定术
522	C03眼科口腔	2023-10-26	2023-11-01	3439178	林兰香	女	75Y	桡骨远端骨折	骨折术后恢复期;特发性(原发性)高血压;2型糖尿病;脂肪肝;后天性肾囊肿;心功能不全	治愈	王振文	水小龙	徐宏威	桡骨骨折切开复位钢板内固定术;关节软骨修复术
523	C03眼科口腔	2023-10-24	2023-11-01	3439301	高文珍	女	56Y	下颌骨骨折		治愈	聂鑫	聂鑫	徐兴侨	下颌骨骨折切开复位内固定术
524	C03眼科口腔	2023-10-30	2023-11-02	3439682	林子恒	男	7Y	取除骨折内固定装置		其他	翁益民	翁益民	王特	肱骨内固定装置去除术
525	C03眼科口腔	2023-10-30	2023-11-04	3440220	高立龙	男	34Y	取除骨折内固定装置	肺炎	其他	黄俊武	余贤斌	郑文浩	跟骨内固定物取出术
526	C03眼科口腔	2023-10-30	2023-11-05	3440882	蔡晓月	女	59Y	取除骨折内固定装置		其他	翁益民	翁益民	王特	踝关节内固定装置去除术
527	C03眼科口腔	2023-10-30	2023-11-06	3441364	伍英英	女	53Y	肱骨大结节骨折	肩袖损伤;肩关节盂骨折;脂肪肝	治愈	潘孝云	杨阳		肱骨骨折切开复位螺钉内固定术;肩关节盂唇固定术;关节镜检查
528	C03眼科口腔	2023-10-30	2023-11-06	3441500	林定省	男	67Y	跟骨骨折	跖骨骨折;心功能不全;肾结石;后天性肾囊肿	好转	黄俊武	余贤斌	郑文浩	距骨骨折切开复位钢板内固定术;关节软骨修复术
529	C03眼科口腔	2023-10-30	2023-11-07	3441762	陈贤定	男	54Y	桡骨骨折	腕关节脱位;肝回声不均;后天性肾囊肿;心功能不全	治愈	翁益民	翁益民	王特	桡骨骨折切开复位钢板内固定术
530	C03眼科口腔	2023-10-31	2023-11-08	3442380	冯善军	男	52Y	锁骨骨折		好转	翁益民	翁益民	王特	锁骨骨折切开复位钢板内固定术;锁骨人工骨植骨术
531	C03眼科口腔	2023-11-02	2023-11-08	3442418	李华河	男	39Y	髌骨骨折		好转	洪建军	卢晓郎		髌骨骨折切开复位张力带钢丝内固定术;骨空隙骨水泥填充术;关节软骨修复术
532	C03眼科口腔	2023-11-07	2023-11-08	3442576	方忠	男	58Y	眶骨骨折	眼睑挫伤;玻璃体变性;特发性(原发性)高血压	好转	郑穗联	夏哲人	张煜
533	C03眼科口腔	2023-11-06	2023-11-11	3443529	汪加喜	男	37Y	眶骨骨折	肋骨骨折;眼球挫伤	治愈	韩晓辉	韩晓辉	林达	髋骨骨折切开复位螺钉内固定术;眼眶缺损修补术
534	C03眼科口腔	2023-11-01	2023-11-11	3443620	邹益娥	女	65Y	肘关节骨折	泌尿道感染;脊柱侧弯;下肢静脉曲张	好转	黄俊武	余贤斌	郑文浩	肱骨骨折切开复位钢板内固定术;关节软骨修复术;副韧带修补术
535	C03眼科口腔	2023-11-01	2023-11-12	3443910	项美招	女	67Y	锁骨骨折	鼻骨骨折;肋骨骨折;高血压;脂肪肝;肝囊肿;面部挫伤;冠状动脉粥样硬化性心脏病;动脉硬化;主动脉钙化	治愈	余可和	胡炜	胡炜	锁骨骨折切开复位钢板内固定术;骨空隙骨水泥填充术
536	C03眼科口腔	2023-11-04	2023-11-12	3444068	张秋林	男	45Y	外踝骨折	在踝和足水平的韧带破裂;脂肪肝;胆囊息肉;前列腺结石	好转	翁益民	翁益民	王特	踝关节骨折切开复位钢板内固定术;骨空隙骨水泥填充术
537	C03眼科口腔	2023-11-06	2023-11-12	3444071	潘雪梅	女	53Y	锁骨骨折		治愈	陈星隆	周飞亚	朱旭伟	锁骨骨折切开复位钢板内固定术
538	C03眼科口腔	2023-11-03	2023-11-12	3444105	李翠凤	女	73Y	踝关节骨折	心房颤动;特发性(原发性)高血压;脂肪肝;胆囊结石;肾结石	治愈	洪建军	卢晓郎		踝关节骨折切开复位钢板内固定术;开放性骨折部位的清创术;关节软骨修复术
539	C03眼科口腔	2023-11-04	2023-11-12	3444112	李有方	男	20Y	取除骨折内固定装置		其他	聂鑫	聂鑫	于健涛	下颌骨内固定装置取出术
540	C03眼科口腔	2023-11-08	2023-11-12	3444209	冯尚俭	男	14Y	锁骨骨折		好转	余可和	胡炜	胡炜
541	C03眼科口腔	2023-11-08	2023-11-13	3444526	薛约雪	女	38Y	取除骨折内固定装置		其他	聂鑫	李锋	于健涛	上颌骨内固定装置取出术
542	C03眼科口腔	2023-11-12	2023-11-13	3444535	何冬文	男	38Y	取除骨折内固定装置	骨折术后	其他	韩晓辉	杨顺海	宋广伟	去除面骨内固定装置
543	C03眼科口腔	2023-11-04	2023-11-13	3444539	曹林	男	27Y	颧骨骨折	眶骨骨折	治愈	聂鑫	聂鑫	于健涛	颧骨骨折切开复位内固定术;眶骨骨折切开复位内固定术
544	C03眼科口腔	2023-11-11	2023-11-13	3444592	倪尧花	女	84Y	股骨粗隆间骨折	清创术后;高血压	好转	陈华	孙辽军	蔡乐益
545	C03眼科口腔	2023-11-01	2023-11-13	3444693	贾飞英	女	64Y	踝关节骨折	膝内侧半月板伴副韧带损伤;膝关节十字韧带损伤;老年性关节炎;桡骨远端骨折;特发性(原发性)高血压;膝关节积液	好转	翁益民	翁益民	王特	踝关节骨折切开复位钢板内固定术;副韧带修补术
546	C03眼科口腔	2023-11-10	2023-11-15	3445256	白旭程	男	16Y	髂骨骨折	肝血管瘤	好转	黄俊武	余贤斌	郑文浩	髂骨骨折切开复位钢板内固定术
547	C03眼科口腔	2023-11-09	2023-11-15	3445340	邵益锋	男	25Y	取除骨折内固定装置	肘关节僵硬;脂肪肝;后天性肾囊肿	其他	陈华	孙辽军	蔡乐益	桡骨内固定装置去除术;跟骨内固定物取出术;肘关节松解术
548	C03眼科口腔	2023-11-10	2023-11-16	3445933	陈辉	男	40Y	桡骨干骨折	肋骨骨折;肺气肿;脂肪肝;肝钙化灶;后天性肾囊肿;前列腺结石	治愈	洪建军	卢晓郎		桡骨骨折切开复位钢板内固定术
549	C03眼科口腔	2023-11-10	2023-11-18	3446641	陈超顺	男	32Y	锁骨骨折		治愈	洪建军	卢晓郎		锁骨骨折切开复位钢板内固定术;锁骨人工骨植骨术
550	C03眼科口腔	2023-11-09	2023-11-18	3446694	叶阿英	女	57Y	鹰嘴骨折	肱骨近端骨折;肩袖损伤;桡骨下端骨折;肱骨髁上骨折;脂肪肝;肝诊断性影像异常	治愈	陈龙	应晓洲	应晓洲	尺骨骨折切开复位钢板内固定术;肱骨骨折切开复位钢板内固定术;肩袖修补术;关节软骨修复术
551	C03眼科口腔	2023-11-10	2023-11-18	3446782	阮国强	男	44Y	眶骨骨折	眼睑裂伤;鼻骨骨折	治愈	韩晓辉	杨顺海	宋广伟	眶骨骨折切开复位内固定术;眼眶缺损修补术
552	C03眼科口腔	2023-11-12	2023-11-19	3447189	叶克林	男	30Y	下颌骨骨折		治愈	聂鑫	李锋	于健涛	下颌骨骨折切开复位内固定术
553	C03眼科口腔	2023-11-09	2023-11-19	3447267	王振稳	男	32Y	胫腓骨下端骨折	踝关节半脱位;脂肪肝;前列腺结石	好转	翁益民	翁益民	王特	骨空隙骨水泥填充术;腓骨骨折切开复位钢板内固定术;踝脱位开放性复位术
554	C03眼科口腔	2023-10-30	2023-11-20	3447382	金育寿	男	47Y	胫骨平台骨折	股骨内髁骨折;膝内侧半月板损伤;膝关节积液;脂肪肝	好转	翁益民	翁益民	王特	胫骨骨折切开复位钢板内固定术
555	C03眼科口腔	2023-10-31	2023-11-20	3447392	彭秀文	男	49Y	肩胛骨骨折	胫骨上端骨折;肋骨骨折;髋臼骨折;肝包膜下积液;气胸;胸腔积液;后天性肾囊肿;蛛网膜下出血	好转	翁益民	翁益民	王特	胫骨骨折切开复位钢板内固定术;胫骨人工骨植骨术;肩胛骨骨折切开复位钢板内固定术
556	C03眼科口腔	2023-11-12	2023-11-20	3447422	陈贤串	女	52Y	胫腓骨闭合性骨折	腓骨骨折	好转	陈华	孙辽军	蔡乐益	胫骨骨折切开复位钢板内固定术;骨空隙骨水泥填充术
557	C03眼科口腔	2023-11-08	2023-11-21	3447992	伍涛	男	37Y	跟骨骨折	孤立性肺结节;皮肤挫伤	治愈	余可和	胡炜	胡炜	跟骨骨折切开复位钢板内固定术;关节软骨修复术;跟骨人工骨植骨术
558	C03眼科口腔	2023-11-09	2023-11-21	3448067	罗明忠	男	51Y	眼撕裂伤和破裂伴有眼内组织脱出或缺失	前房积血;玻璃体积血;虹膜缺如;先天性晶状体畸形，其他的;视网膜脱离;脉络膜脱离;额骨骨折;前额开放性损伤	治愈	冯旺强	董志章	宋广伟	眼球破裂修补术;前房成形术;皮肤和皮下组织非切除性清创;后入路玻璃体切割术;前房成形术
559	C03眼科口腔	2023-11-16	2023-11-22	3448536	陈雪梅	女	45Y	踝关节骨折	跗骨骨折;跖骨骨折;肌腱和肌肉损伤	治愈	洪建军	卢晓郎		踝关节骨折切开复位钢针内固定术;关节软骨修复术
560	C03眼科口腔	2023-11-20	2023-11-22	3448621	吕忠宽	男	45Y	泪小管断裂	眼睑裂伤;肩胛骨骨折	治愈	韩晓辉	杨顺海	林达	泪小管吻合术;鼻泪管探通术;鼻泪管插管术
561	C03眼科口腔	2023-11-21	2023-11-22	3448625	黄张玉	女	43Y	眶骨骨折	上颌骨骨折	治愈	冯旺强	杨顺海	骆伊丽	眶骨骨折切开复位内固定术;上颌骨骨折切开复位内固定术
562	C03眼科口腔	2023-11-12	2023-11-22	3448632	皮丹丹	女	33Y	下颌骨骨折		治愈	聂鑫	李锋	于健涛	下颌骨骨折切开复位内固定术
563	C03眼科口腔	2023-11-21	2023-11-23	3448821	李协其	男	16Y	取除骨折内固定装置		其他	冯旺强	杨顺海	宋广伟	去除面骨内固定装置
564	C03眼科口腔	2023-11-16	2023-11-23	3448857	王文柱	男	43Y	锁骨骨折	脂肪肝	治愈	洪建军	卢晓郎		锁骨骨折切开复位钢板内固定术;锁骨植骨术
565	C03眼科口腔	2023-11-17	2023-11-24	3449277	陈进鲁	男	50Y	取除骨折内固定装置	骨折术后恢复期;特发性(原发性)高血压;老年性心脏病;肾结石;孤立性肺结节	其他	赵友明	柯陈荣		股骨内固定装置去除术
566	C03眼科口腔	2023-11-15	2023-11-25	3449597	王大东	男	59Y	踝关节骨折	脂肪肝;前列腺结石	好转	陈华	孙辽军	蔡乐益	踝关节骨折切开复位钢板内固定术;关节软骨修复术
567	C03眼科口腔	2023-11-15	2023-11-25	3449618	伍仙云	女	62Y	肱骨近端骨折	肩袖损伤;孤立性肺结节;主动脉钙化;后天性肾囊肿;老年性心脏病	治愈	赵友明	柯陈荣		肱骨骨折切开复位钢板内固定术;肩袖修补术;关节软骨修复术
568	C03眼科口腔	2023-11-13	2023-11-25	3449640	李敏华	男	45Y	胫骨干骨折	骨囊肿;腱鞘囊肿;腓骨骨折;脂肪肝	治愈	陈龙	应晓洲	应晓洲	胫骨骨折切开复位钢板内固定术;胫骨病损切除术;胫骨人工骨植骨术;踝关节病损切除术;踝关节囊缝合术
569	C03眼科口腔	2023-11-06	2023-11-25	3449645	柯显更	男	67Y	骨折不连接\[假关节\]	取除骨折内固定装置;冈上肌肌腱损伤;肝囊肿;肾盂积水，其他的;肾结石;前列腺增生;前列腺结石	好转	陈华	孙辽军	蔡乐益	胫骨外固定装置去除术;石膏绷带固定;胫骨内固定装置去除术;胫骨植骨术;髂骨切除术用作移植物;胫骨骨折切开复位钢板内固定术
570	C03眼科口腔	2023-11-21	2023-11-25	3450008	汪德进	男	70Y	桡骨远端骨折	肋骨骨折;2型糖尿病;肺炎;心功能不全;由于其他和未特指原因而使病人决定不进行操作	好转	翁益民	翁益民	王特
571	C03眼科口腔	2023-11-09	2023-11-26	3450340	吴波浪	男	25Y	跖骨骨折	髋臼骨折;脂肪肝	治愈	翁益民	翁益民	王特	跖骨骨折切开复位钢板内固定术
572	C03眼科口腔	2023-11-22	2023-11-27	3450567	郑素娟	女	53Y	取除骨折内固定装置	骨折术后恢复期;脂肪肝	其他	赵友明	柯陈荣		胫骨内固定装置去除术
573	C03眼科口腔	2023-11-22	2023-11-27	3450573	张玲燕	女	35Y	取除骨折内固定装置	脂肪肝	其他	赵友明	柯陈荣		尺骨内固定装置去除术
574	C03眼科口腔	2023-11-20	2023-11-27	3450603	王伟业	男	21Y	外踝骨折	在踝和足水平的韧带破裂;脂肪肝;前列腺结石	治愈	赵友明	柯陈荣		踝关节骨折切开复位钢针内固定术;踝关节韧带修补术;关节软骨修复术;石膏托固定术
575	C03眼科口腔	2023-11-21	2023-11-27	3450717	施明贵	男	54Y	胫腓骨干骨折	脂肪肝	治愈	陈龙	应晓洲	应晓洲	胫骨骨折闭合复位螺钉内固定术;腓骨骨折切开复位钢板内固定术
576	C03眼科口腔	2023-11-14	2023-11-29	3451572	余李德	男	54Y	眼撕裂伤不伴有眼内组织脱出或缺失	盲，单眼;玻璃体积血;前房积血;创伤性视网膜脱离;眶骨骨折;颧弓骨折;胫腓骨干骨折;创伤性蛛网膜下腔出血;脂肪肝;颈椎间盘突出;掌骨骨折;大多角骨骨折	治愈	冯旺强	林达	林达	眼球修补术;前房成形术;眶骨骨折切开复位术;颧骨骨折切开复位内固定术;胫骨骨折切开复位钢板内固定术;掌骨骨折切开复位钢板内固定术;后入路玻璃体切割术
577	C03眼科口腔	2023-11-19	2023-11-29	3451588	南慧文	女	69Y	胫腓骨干骨折	趾骨骨折;清创术后;特发性(原发性)高血压;老年性心脏瓣膜病	治愈	赵友明	柯陈荣		胫骨骨折闭合复位螺钉内固定术;腓骨骨折闭合复位螺钉内固定术
578	C03眼科口腔	2023-11-22	2023-11-29	3451654	李翠兰	女	72Y	肱骨近端骨折	高血压;肺部感染;脂肪肝;糖尿病;老年性心脏病	治愈	洪建军	卢晓郎		肱骨骨折切开复位钢板内固定术;肩袖修补术;肱骨人工骨植骨术
579	C03眼科口腔	2023-11-22	2023-11-29	3451706	潘志华	女	56Y	踝关节骨折	乙型病毒性肝炎;心功能不全;脂肪肝;胆囊结石;孤立性肺结节	治愈	汤骏	吴剑彬	吴剑彬	踝关节骨折切开复位钢板内固定术
580	C03眼科口腔	2023-11-28	2023-11-29	3451717	陈建光	男	56Y	眶骨骨折	复视;面部软组织挫伤	治愈	冯旺强	杨顺海	骆伊丽	眶骨骨折切开复位内固定术;眼眶缺损修补术
581	C03眼科口腔	2023-11-18	2023-11-29	3451722	陆成豪	男	34Y	胫骨骨折		好转	陈华	孙辽军	蔡乐益	胫骨骨折切开复位钢板内固定术;骨空隙填补物置入
582	C03眼科口腔	2023-11-22	2023-11-29	3451760	龙国林	男	29Y	跖骨骨折	高尿酸血症	治愈	孔建中	陈墨川		跖骨骨折切开复位钢针内固定术;关节软骨修复术
583	C03眼科口腔	2023-11-21	2023-11-30	3452144	陈国勇	男	49Y	跟骨骨折	肝回声不均;后天性肾囊肿	治愈	洪建军	卢晓郎		跟骨骨折切开复位钢板内固定术;跟骨人工骨植骨术;关节软骨修复术
584	C03眼科口腔	2023-11-24	2023-12-02	3452152	章莲芬	女	52Y	跖骨骨折	腰椎压缩性骨折;椎间盘突出;跗骨骨折	未愈	陈华	孙辽军	陈春慧
585	C03眼科口腔	2023-11-22	2023-12-02	3452800	胡月翠	女	72Y	肱骨近端骨折	骨质疏松;肝回声不均;肾结石;瓣膜风湿性心内膜疾病;支气管扩张(症);陈旧性肋骨骨折	治愈	陈华	孙辽军	陈春慧	肱骨骨折切开复位钢板内固定术;关节软骨修复术
586	C03眼科口腔	2023-11-28	2023-12-02	3452802	赵林峰	男	31Y	取除骨折内固定装置	脂肪肝	其他	陈华	孙辽军	陈春慧	肱骨内固定装置去除术
587	C03眼科口腔	2023-11-29	2023-12-03	3453139	赵玲君	女	52Y	取除骨折内固定装置	陈旧性股骨干骨折;肾术后;恶性肿瘤手术后的随诊检查;陈旧性肺结核;老年性心脏病;肺间质纤维化;乳房纤维囊性乳腺病;脂肪肝	其他	赵友明	柯陈荣	汪吉棋	锁骨内固定装置去除术;髌骨内固定装置去除术
588	C03眼科口腔	2023-11-28	2023-12-03	3453281	周福翠	女	73Y	胫骨平台骨折	膝关节多处韧带损伤;肌腱和肌肉损伤;肾结石;后天性肾囊肿;膝关节积液;膝关节积血;膝关节退行性病变;下肢动脉粥样硬化;下肢静脉曲张;由于其他和未特指原因而使病人决定不进行操作	好转	陈龙	应晓洲	应晓洲
589	C03眼科口腔	2023-11-23	2023-12-04	3453577	张增海	男	52Y	跟骨骨折	后天性肾囊肿	好转	翁益民	翁益民	王特	跟骨骨折切开复位钢板内固定术;骨空隙填补物置入
590	C03眼科口腔	2023-11-29	2023-12-04	3453580	郑连凤	女	61Y	取除骨折内固定装置	胸椎压缩性骨折;骨折术后恢复期;隐性预激综合症;老年性心脏病;主动脉钙化;冠状动脉粥样硬化	其他	赵友明	柯陈荣	汪吉棋	椎骨内固定物取出术
591	C03眼科口腔	2023-11-21	2023-12-04	3453584	张素素	女	27Y	双踝骨折	肺部感染	好转	翁益民	翁益民	王特	踝关节骨折切开复位钢板内固定术;腓骨人工骨植骨术
592	C03眼科口腔	2023-11-30	2023-12-04	3453732	李婷婷	女	25Y	下颌骨骨折	颞下颌关节脱位	好转	聂鑫	李锋	于健涛	下颌骨骨折闭合性复位术
593	C03眼科口腔	2023-12-04	2023-12-05	3454035	程昌富	男	46Y	眼撕裂伤和破裂伴有眼内组织脱出或缺失	前房积血;眼睑裂伤;眶骨骨折	治愈	冯旺强	董志章	林达	眼球修补术;结膜修补术;眼睑裂伤缝合术
594	C03眼科口腔	2023-11-29	2023-12-05	3454050	孔庆通	男	55Y	取除骨折内固定装置	脂肪肝;后天性肾囊肿;心功能不全	其他	陈华	陈华	陈春慧	腓骨内固定装置去除术
595	C03眼科口腔	2023-11-22	2023-12-05	3454091	吴传杰	男	17Y	双踝骨折	清创术后;肌腱和肌肉损伤	治愈	洪建军	卢晓郎	卢晓郎	踝关节骨折切开复位钢板内固定术;关节软骨修复术
596	C03眼科口腔	2023-11-26	2023-12-05	3454155	项少新	男	47Y	眶骨骨折		治愈	韩晓辉	杨顺海	骆伊丽	眶骨骨折切开复位内固定术;眼眶缺损修补术
597	C03眼科口腔	2023-12-03	2023-12-05	3454173	童有根	男	60Y	眶骨骨折		治愈	冯旺强	杨顺海	林达	眶骨骨折切开复位内固定术;眼眶缺损修补术
598	C03眼科口腔	2023-11-28	2023-12-06	3454717	王兰香	女	70Y	桡骨远端骨折	脂肪肝;心功能不全	治愈	陈华	孙辽军	陈春慧	桡骨骨折切开复位钢板内固定术;关节软骨修复术;石膏绷带固定
599	C03眼科口腔	2023-12-04	2023-12-06	3454844	金康纯	男	45Y	取除骨折内固定装置	脂肪肝	其他	翁益民	翁益民	王特	踝关节内固定装置去除术
600	C03眼科口腔	2023-11-27	2023-12-07	3454997	刘采勤	女	49Y	踝关节骨折	心功能不全	好转	汤骏	吴剑彬	吴剑彬	踝关节骨折切开复位钢板内固定术
601	C03眼科口腔	2023-12-01	2023-12-09	3455539	戚爱光	男	56Y	胫骨平台骨折	膝关节外侧副韧带损伤;脂肪肝;肾结石;孤立性肺结节;主动脉钙化	治愈	洪建军	卢晓郎	卢晓郎	胫骨骨折闭合复位螺钉内固定术;副韧带修补术
602	C03眼科口腔	2023-11-25	2023-12-09	3455550	黄桃珠	女	35Y	股骨颈骨折		好转	翁益民	翁益民	王特	股骨骨折闭合复位螺钉内固定术
603	C03眼科口腔	2023-11-21	2023-12-09	3455581	黄金钗	女	56Y	腰椎压缩性骨折	腰椎间盘突出;肝钙化灶;胆囊息肉	好转	陈华	陈华	陈春慧
604	C03眼科口腔	2023-12-01	2023-12-09	3455815	李碎足	男	52Y	掌骨骨折	脂肪肝;肾结石	治愈	陈龙	应晓洲	应晓洲	掌骨骨折切开复位钢板内固定术
605	C03眼科口腔	2023-11-25	2023-12-09	3455856	季坛献	男	56Y	眼撕裂伤和破裂伴有眼内组织脱出或缺失	玻璃体积血;前房积血;视网膜脱离;眶骨骨折;特发性(原发性)高血压	治愈	郑穗联	夏哲人	张煜	眼球破裂修补术;用激光光凝固法的视网膜裂伤修补术;玻璃体气液交换，视网膜复位术;后入路玻璃体切割术;前房冲洗术
606	C03眼科口腔	2023-12-06	2023-12-10	3456029	卢妍希	女	5Y	取除骨折内固定装置		其他	赵友明	柯陈荣	汪吉棋	胫骨内固定装置去除术
607	C03眼科口腔	2023-12-06	2023-12-10	3456039	邹彩丹	女	71Y	取除骨折内固定装置	特发性(原发性)高血压;心功能不全;脂肪肝	其他	陈华	陈华	陈春慧	踝关节内固定装置去除术
608	C03眼科口腔	2023-12-06	2023-12-10	3456043	吴可江	男	44Y	取除骨折内固定装置	肺间质纤维化;肝回声不均	其他	赵友明	柯陈荣	汪吉棋	肱骨内固定装置去除术
609	C03眼科口腔	2023-11-22	2023-12-10	3456048	赵美丽	女	56Y	双踝骨折	肌腱和肌肉损伤;老年性心脏病;孤立性肺结节;肺大疱;脂肪肝;肝囊肿;主动脉钙化;间质性肺炎;踝关节脱位;冠状动脉粥样硬化;小腿水泡	治愈	赵友明	柯陈荣	汪吉棋	踝关节骨折切开复位螺钉内固定术;关节软骨修复术;骨空隙骨水泥填充术;石膏托固定术
610	C03眼科口腔	2023-12-06	2023-12-10	3456088	薛茂笑	男	47Y	取除骨折内固定装置	特发性(原发性)高血压;老年性心脏病;脂肪肝;胆囊胆固醇沉着症;输尿管结石;肾盂积水，其他的;前列腺增生;后天性肾囊肿	其他	赵友明	柯陈荣	汪吉棋	胫骨内固定装置去除术
611	C03眼科口腔	2023-11-20	2023-12-10	3456246	卢中才	男	41Y	前房积血	虹膜离断;人工晶体移位;脉络膜脱离;视网膜脱离;眶骨骨折	治愈	韩晓辉	杨顺海	林达	结膜裂伤修补术;结膜囊成形术;前房冲洗术;后入路玻璃体切割术;人工晶体取出术;玻璃体硅油置入术，用于视网膜再附着
612	C03眼科口腔	2023-12-02	2023-12-11	3456495	李冬柳	女	63Y	肱骨近端多发性骨折	肩袖损伤;特发性(原发性)高血压;脂肪肝;老年性心脏病;胃术后	治愈	赵友明	柯陈荣	汪吉棋	肱骨骨折切开复位钢板内固定术;关节软骨修复术;肩袖修补术
613	C03眼科口腔	2023-12-10	2023-12-11	3456580	潘长富	男	50Y	取除骨折内固定装置		其他	韩晓辉	杨顺海	宋广伟	去除面骨内固定装置
614	C03眼科口腔	2023-12-10	2023-12-11	3456652	胡将云	男	69Y	取除骨折内固定装置	白内障;陈旧性肺结核	其他	韩晓辉	杨顺海	宋广伟	去除面骨内固定装置
615	C03眼科口腔	2023-12-10	2023-12-11	3456807	周传山	男	47Y	眶骨骨折		治愈	韩晓辉	杨顺海	林达	眶骨骨折切开复位内固定术
616	C03眼科口腔	2023-12-05	2023-12-12	3457225	余飞	男	30Y	上颌骨骨折	下颌骨骨折;面部挫伤	治愈	聂鑫	龚裕强	于健涛	上颌骨骨折切开复位内固定术;拔牙术;皮肤和皮下组织非切除性清创;其他牙修复
617	C03眼科口腔	2023-12-11	2023-12-12	3457237	蔡菊兰	女	50Y	取除骨折内固定装置	致密性骨炎;孤立性肺结节;肝钙化灶;胆囊息肉;由于禁忌证而未进行操作	其他	赵友明	柯陈荣	汪吉棋
618	C03眼科口腔	2023-12-06	2023-12-13	3457603	王新刚	男	41Y	取除骨折内固定装置		其他	聂鑫	聂鑫	于健涛	去除面骨内固定装置
619	C03眼科口腔	2023-12-05	2023-12-13	3457682	钱苏兰	女	63Y	踝关节骨折	糖尿病;高血压;脂肪肝;肝囊肿;肾结石	好转	翁益民	翁益民	王特
620	C03眼科口腔	2023-12-10	2023-12-13	3457702	林瑞生	男	84Y	髁突骨折		治愈	聂鑫	李锋	于健涛
621	C03眼科口腔	2023-12-05	2023-12-13	3457717	吴晨恺	男	14Y	髂骨骨折		好转	翁益民	翁益民	王特	髂骨骨折切开复位螺钉内固定术
622	C03眼科口腔	2023-12-05	2023-12-13	3457731	隋大洋	男	38Y	桡骨远端骨折	尺骨茎突骨折;脂肪肝	治愈	翁益民	翁益民	王特	桡骨骨折切开复位钢板内固定术;关节软骨修复术;骨空隙骨水泥填充术
623	C03眼科口腔	2023-12-06	2023-12-13	3457751	柯丽香	女	60Y	踝关节骨折	脂肪肝;肝囊肿;膀胱占位性病变	治愈	洪建军	卢晓郎	卢晓郎	踝关节骨折切开复位钢板内固定术
624	C03眼科口腔	2023-12-05	2023-12-13	3457798	陈继春	男	62Y	股骨颈骨折	糖尿病;前列腺结石;肝囊肿	好转	翁益民	翁益民	王特	股骨骨折闭合复位螺钉内固定术
625	C03眼科口腔	2023-12-01	2023-12-13	3457825	叶秀珠	女	77Y	踝关节骨折	特发性(原发性)高血压;静脉血栓形成	好转	翁益民	翁益民	王特	踝关节骨折切开复位钢板内固定术;骨空隙骨水泥填充术
626	C03眼科口腔	2023-12-07	2023-12-13	3457855	毛雪芬	女	38Y	颧弓骨折		治愈	聂鑫	李锋	于健涛	颧骨骨折切开复位内固定术
627	C03眼科口腔	2023-11-25	2023-12-13	3457860	吴华荣	男	43Y	开放性下颌骨骨折	肺结核，仅经痰培养所证实;创伤性气胸;开放性上颌骨骨折;创伤性硬脑膜下血肿;脑挫伤;蛛网膜下出血;头皮血肿;肋骨骨折;肝钙化灶;脊柱骨折;面部软组织挫伤	治愈	聂鑫	聂鑫	于健涛	鼻皮肤和皮下组织非切除性清创;唇部皮肤和皮下组织非切除性清创;唇裂伤缝合术;鼻裂伤缝合术;上颌骨骨折切开复位内固定术;下颌骨骨折切开复位内固定术
628	C03眼科口腔	2023-12-11	2023-12-16	3458941	薛邦春	男	57Y	眶骨骨折	上颌骨骨折;无晶状体;白内障;特发性(原发性)高血压	治愈	韩晓辉	杨顺海	骆伊丽	眶骨骨折切开复位内固定术;上颌骨骨折切开复位内固定术
629	C03眼科口腔	2023-12-13	2023-12-17	3459086	刘克荣	男	48Y	取除骨折内固定装置		其他	陈华	陈华	陈春慧	踝关节内固定装置去除术;跖骨内固定装置去除术
630	C03眼科口腔	2023-12-12	2023-12-17	3459091	郑小萍	女	50Y	取除骨折内固定装置	特发性(原发性)高血压;心功能不全;脂肪肝;胆囊胆固醇沉着症	其他	陈华	陈华	陈春慧	桡骨内固定装置去除术
631	C03眼科口腔	2023-12-13	2023-12-17	3459097	杨睿	男	25Y	取除骨折内固定装置	脂肪肝	其他	陈华	陈华	陈春慧	桡骨内固定装置去除术
632	C03眼科口腔	2023-12-13	2023-12-17	3459113	吴梦悦	女	15Y	取除骨折内固定装置		其他	陈华	陈华	陈春慧	股骨内固定装置去除术
633	C03眼科口腔	2023-12-16	2023-12-17	3459269	汪美琴	女	62Y	桡骨远端骨折	脂肪肝	未愈	石成弟	方文来	方文来
634	C03眼科口腔	2023-12-09	2023-12-17	3459277	潘晓庆	女	31Y	指骨良性肿瘤	病理性骨折，不可归类在他处者	治愈	陈华	陈华	陈春慧	指骨病损切除术;指骨植骨术;髂骨切除术用作移植物
635	C03眼科口腔	2023-12-14	2023-12-18	3459649	盛盈华	男	53Y	腰椎骨折	脂肪肝;肝囊肿;前列腺结石	治愈	赵友明	柯陈荣	汪吉棋
636	C03眼科口腔	2023-12-17	2023-12-18	3459822	孔祥骐	男	24Y	取除骨折内固定装置		其他	韩晓辉	杨顺海	林达	去除面骨内固定装置
637	C03眼科口腔	2023-12-03	2023-12-18	3459876	司长江	男	33Y	眶骨骨折	鼻骨骨折;上颌骨骨折;眼睑裂伤;特发性(原发性)高血压;脂肪肝	治愈	韩晓辉	杨顺海	宋广伟	眶骨骨折切开复位内固定术;颅骨骨折复位术;上颌骨骨折切开复位内固定术
638	C03眼科口腔	2023-12-12	2023-12-19	3460057	高吓吉	男	68Y	肱骨近端骨折		治愈	黄俊武	余贤斌	郑文浩	肱骨骨折切开复位钢板内固定术;关节软骨修复术;肩袖修补术
639	C03眼科口腔	2023-12-09	2023-12-19	3460307	林牡丹	女	65Y	白内障	2型糖尿病性视网膜病变;玻璃体积血;玻璃体变性;牵引性视网膜脱离;2型糖尿病;动脉的动脉粥样硬化，其他的;骨质疏松;甲状腺囊肿;后天性肾囊肿;骨折术后恢复期	好转	冯旺强	杨顺海	骆伊丽	白内障超声乳化抽吸术;后入路玻璃体切割术;视网膜部分剥离术;用激光光凝固法的视网膜脱离修补术;玻璃体硅油置入术，用于视网膜再附着
640	C03眼科口腔	2023-12-12	2023-12-20	3460707	滕素燕	女	37Y	跖骨骨折	骰骨骨折	治愈	孔建中	胡炜	陈墨川	跖骨骨折切开复位钢针内固定术;关节软骨修复术
641	C03眼科口腔	2023-12-16	2023-12-21	3461085	项祖锵	男	57Y	取除骨折内固定装置	高血压;糖尿病;心脏和冠状循环诊断性影像检查的异常所见;脂肪肝;肾结石;肝回声不均	其他	陈华	孙辽军	陈春慧	跟骨内固定物取出术
642	C03眼科口腔	2023-12-19	2023-12-21	3461206	黄满弟	女	64Y	眶骨骨折	上颌骨骨折;特发性(原发性)高血压;颧骨骨折	治愈	冯旺强	杨顺海	宋广伟	眶骨骨折切开复位内固定术;上颌骨骨折切开复位内固定术;颧骨骨折切开复位内固定术
643	C03眼科口腔	2023-12-09	2023-12-22	3461283	王贵	男	43Y	胫腓骨下端骨折	脂肪肝;肾结石;胸腔积液	好转	翁益民	翁益民	王特	胫骨骨折切开复位钢板内固定术;胫骨人工骨植骨术
644	C03眼科口腔	2023-12-19	2023-12-22	3461380	潘箩建	男	26Y	取除骨折内固定装置	脂肪肝;肝囊肿	其他	石成弟	方文来	方文来	踝关节内固定装置去除术
645	C03眼科口腔	2023-12-16	2023-12-23	3461705	王余宽	男	59Y	玻璃体积血	创伤性视网膜脱离;眶骨骨折;2型糖尿病	治愈	韩晓辉	杨顺海	宋广伟	后入路玻璃体切割术;白内障超声乳化抽吸术;用激光光凝固法的视网膜裂伤修补术;玻璃体硅油置入术，用于视网膜再附着
646	C03眼科口腔	2023-12-18	2023-12-23	3461758	周爱玲	女	53Y	取除骨折内固定装置	高血压	其他	翁益民	翁益民	王特	肩锁关节内固定物取出术
647	C03眼科口腔	2023-12-14	2023-12-23	3461928	任永中	男	47Y	踝关节骨折	腓骨骨折;脂肪肝;肾结石	治愈	陈龙	应晓洲	应晓洲	踝关节骨折切开复位螺钉内固定术;腓骨骨折切开复位钢板内固定术;关节软骨修复术;腓骨人工骨植骨术
648	C03眼科口腔	2023-12-19	2023-12-23	3462043	余溢多	男	31Y	取除骨折内固定装置	脂肪肝;肝回声不均	其他	陈华	孙辽军	陈春慧	掌骨内固定装置去除术
649	C03眼科口腔	2023-12-18	2023-12-24	3461823	张春萍	女	62Y	取除骨折内固定装置	脂肪肝;肾结石;下腔静脉血栓形成;糖尿病;脊柱侧弯;特发性肺纤维化	其他	翁益民	翁益民	王特	肱骨内固定装置去除术
650	C03眼科口腔	2023-12-18	2023-12-24	3462159	林群	女	37Y	股骨颈骨折		治愈	陈华	孙辽军	陈春慧	股骨骨折闭合复位螺钉内固定术
651	C03眼科口腔	2023-12-11	2023-12-24	3462180	尹彩云	女	48Y	内踝骨折	距骨骨折;腓总神经损伤;下肢浅表损伤;原发性甲状腺功能亢进症	好转	黄义星	黄义星	张儒
652	C03眼科口腔	2023-12-13	2023-12-25	3462650	陈绪友	男	54Y	肩锁关节脱位	外踝骨折;面部软组织挫伤;荨麻疹;老年性心脏病;胆囊息肉;后天性肾囊肿;前列腺增生;上颌窦炎;前列腺结石;筛窦炎	治愈	赵友明	柯陈荣	汪吉棋	肩锁关节脱位切开复位内固定术
653	C03眼科口腔	2023-12-17	2023-12-25	3462847	钱云丰	男	44Y	髁突骨折		治愈	聂鑫	李锋	于健涛	髁突骨折切开复位内固定术;面骨人工骨置入术
654	C03眼科口腔	2023-12-24	2023-12-25	3462876	李葵秀	女	47Y	取除骨折内固定装置		其他	冯旺强	杨顺海	宋广伟	去除面骨内固定装置
655	C03眼科口腔	2023-12-19	2023-12-25	3462897	陈大成	男	15Y	髂骨骨折		治愈	陈华	孙辽军	陈春慧	髂骨骨折切开复位螺钉内固定术
656	C03眼科口腔	2023-12-24	2023-12-25	3462952	郭志学	男	42Y	取除骨折内固定装置		其他	冯旺强	杨顺海	宋广伟	去除面骨内固定装置
657	C03眼科口腔	2023-12-17	2023-12-25	3462984	贾寿增	男	76Y	髌骨骨折	髌韧带损伤;高血压;下肢动脉粥样硬化;后天性肾囊肿;下肢静脉曲张;心房扩大;心脏和冠状循环诊断性影像检查的异常所见;退行性主动脉瓣疾患;二尖瓣退行性变	治愈	陈龙	应晓洲	应晓洲	髌骨骨折切开复位张力带钢丝内固定术;髌韧带缝合术
658	C03眼科口腔	2023-12-20	2023-12-27	3463952	黄继勇	男	52Y	泪小管断裂	脊髓损伤;眶骨骨折;颈椎椎管狭窄;头皮血肿;高血压;糖尿病;心脏搭桥术后	治愈	韩晓辉	董志章	林达	鼻泪管探通术;泪小管吻合术;鼻泪管插管术;内眦成形术
659	C03眼科口腔	2023-12-20	2023-12-28	3464206	叶旭义	男	36Y	下颌骨骨折	面部损伤	治愈	聂鑫	聂鑫	于健涛	下颌骨骨折切开复位内固定术;皮肤和皮下组织非切除性清创
660	C03眼科口腔	2023-12-26	2023-12-28	3464382	周宾	男	33Y	眶骨骨折	屈光不正	治愈	韩晓辉	杨顺海	林达	眶骨骨折切开复位内固定术
661	C03眼科口腔	2023-12-14	2023-12-30	3464715	陈莲香	女	71Y	胫骨远端骨折伴腓骨骨折	清创术后;外踝骨折;孤立性肺结节;副脾;老年性心脏病;主动脉钙化;距骨骨折	治愈	赵友明	柯陈荣	汪吉棋	胫骨骨折切开复位钢板内固定术;腓骨骨折闭合复位钢针内固定术;关节软骨修复术;石膏托固定术
662	C03眼科口腔	2023-12-21	2023-12-30	3464731	张银水	男	65Y	跖骨基底骨折	肺恶性肿瘤;2型糖尿病;慢性肾炎;骨折术后;抑郁发作;孤立性肺结节;肺钙化;后天性肾囊肿;脂肪肝;前列腺增生;肺炎;下肢静脉肌间血栓形成;下肢静脉曲张;主动脉钙化;冠状动脉粥样硬化	治愈	赵友明	柯陈荣	汪吉棋	跖骨骨折切开复位钢针内固定术;关节软骨修复术;石膏托固定术
663	C03眼科口腔	2023-12-20	2023-12-31	3465360	刘世璋	男	52Y	胫骨平台伴腓骨骨折	脂肪肝	好转	翁益民	翁益民	王特	胫骨骨折切开复位钢板内固定术
664	C03眼科口腔	2023-12-13	2023-12-31	3465383	周敏	男	43Y	胫骨骨折	脂肪肝;多发性肝囊肿;后天性肾囊肿;肾结石;肺部感染	好转	翁益民	翁益民	王特	胫骨骨折切开复位钢板内固定术
665	C03眼科口腔	2023-12-19	2023-12-31	3465586	陈芝爱	男	42Y	闭合性胫骨平台骨折	腓骨头骨折;肝囊肿	好转	翁益民	翁益民	王特	胫骨骨折切开复位钢板内固定术;关节软骨修复术;膝关节半月板成形术;胫骨人工骨植骨术
666	C03眼科口腔	2023-12-23	2023-12-31	3465626	杨德弟	女	78Y	取除骨折内固定装置	高血压;心功能不全;主动脉钙化;肺气肿;肺炎;孤立性肺结节;肾错构瘤;肾盂积水，其他的;后天性肾囊肿	其他	陈华	孙辽军	陈春慧	股骨内固定装置去除术
667	C04综合病房	2022-12-14	2023-01-02	3314673	陈苏娟	女	46Y	脾损伤	多发性腰椎骨折;肺挫伤;创伤性气胸;多发性肋骨骨折;多发性胸椎骨折;创伤性胸腔积液	好转	倪仲琳	黄和	潘传孟
668	C04综合病房	2023-01-02	2023-01-04	3315093	李玉珠	女	60Y	取除骨折内固定装置	高血压病	其他	王振文	水小龙	218241	踝关节内固定物取出术
669	C04综合病房	2023-01-02	2023-01-04	3315094	陈贤明	男	37Y	取除骨折内固定装置		其他	王振文	水小龙	218241	踝关节内固定物取出术
670	C04综合病房	2023-01-02	2023-01-04	3315205	余新滋	男	39Y	取除骨折内固定装置		其他	王振文	水小龙	218241	踝关节内固定物取出术
671	C04综合病房	2022-12-27	2023-01-04	3315352	王龙弟	男	81Y	肠梗阻	高血压病;股骨特指部位骨折	好转	吴伟军	邓应彬	姚志超
672	C04综合病房	2022-12-28	2023-01-05	3315708	夏操芳	男	60Y	不完全性肠梗阻	陈旧性肋骨骨折;髂骨骨折;骶骨骨折;耻骨骨折;特指手术后状态	治愈	王飞海	周磊	218360
673	C04综合病房	2023-01-04	2023-01-06	3315800	陈振龙	男	40Y	取除骨折内固定装置	脂肪肝	其他	杨雷	周一飞	218371	趾骨内固定物取出术
674	C04综合病房	2023-01-04	2023-01-06	3315802	蒋海	男	32Y	取除内固定装置	陈旧性肩胛骨骨折;陈旧性肱骨骨折;肝回声不均	其他	杨雷	周一飞	218371	肩锁关节内固定物取出术
675	C04综合病房	2023-01-05	2023-01-06	3315921	蔡圆英	女	52Y	特指指骨骨折	肾病综合征	治愈	陈龙	陈龙	应晓洲	指骨骨折闭合复位钢针内固定术
676	C04综合病房	2023-01-08	2023-01-08	3316822	吴阿英	女	79Y	腰椎间盘突出	脊椎前移;原发性单侧膝关节病;胃溃疡伴急性出血;骨质疏松伴病理性骨折	好转	武垚森	王胜	武垚森	脊髓神经根粘连松解术
677	C04综合病房	2023-01-07	2023-01-09	3316829	袁喜明	男	43Y	取除骨折内固定装置	脂肪肝	其他	陈龙	应晓洲	应晓洲	股骨内固定物取出术
678	C04综合病房	2023-01-07	2023-01-09	3316830	姜春姑	女	56Y	取除骨折内固定装置	高血压病;心脏病;脂肪肝;后天性肾囊肿	其他	陈龙	应晓洲	应晓洲	桡骨内固定物取出术
679	C04综合病房	2023-01-07	2023-01-09	3316831	李春英	女	39Y	取除骨折内固定装置		其他	陈龙	应晓洲	应晓洲	胫骨内固定物取出术
680	C04综合病房	2023-01-07	2023-01-09	3316832	周和平	女	65Y	取除骨折内固定装置	高血压病;肝囊肿;后天性肾囊肿;肾盂扩张;泌尿器官诊断性影像检查异常所见	其他	杨雷	周一飞	218371	桡骨内固定物取出术
681	C04综合病房	2023-01-07	2023-01-09	3316834	邓招波	男	30Y	取除骨折内固定装置	前列腺结石;肾结石	其他	杨雷	周一飞	218371	股骨内固定物取出术
682	C04综合病房	2023-01-07	2023-01-09	3316835	杨成意	男	49Y	取除骨折内固定装置		其他	王振文	水小龙	218241	胫骨内固定物取出术
683	C04综合病房	2023-01-07	2023-01-09	3316837	张凯伟	男	20Y	取除骨折内固定装置		其他	王振文	水小龙	218241	跟骨内固定物取出术
684	C04综合病房	2022-12-25	2023-01-10	3317531	吕秋香	女	69Y	创伤性肾血肿	创伤性胸腔积液;肋骨骨折;高血压病;多处挫伤;2型糖尿病;腔隙性脑梗死;胆囊结石;牙脱位	好转	杨越涛	王奕庚	王奕庚
685	C04综合病房	2023-01-09	2023-01-11	3317706	徐月华	女	66Y	取除骨折内固定装置	乳房恶性肿瘤个人史;骨质疏松;肺结节;肝囊肿	其他	王振文	水小龙	218241	胫骨内固定物取出术;尺骨内固定物取出术
686	C04综合病房	2023-01-09	2023-01-11	3317709	周丽真	女	46Y	取除骨折内固定装置	肝囊肿	其他	王振文	水小龙	218241	踝关节内固定物取出术
687	C04综合病房	2023-01-09	2023-01-11	3317915	冯维守	男	31Y	取除骨折内固定装置	脂肪肝;胆囊息肉;肝回声不均	其他	杨雷	周一飞	218371	跖骨内固定物取出术
688	C04综合病房	2023-01-10	2023-01-12	3318185	易娜	女	33Y	取除骨折内固定装置		其他	陈龙	应晓洲	应晓洲	桡骨内固定物取出术
689	C04综合病房	2023-01-10	2023-01-12	3318186	张柳花	女	67Y	取除骨折内固定装置	退行性主动脉瓣疾患;肝回声不均;肝囊肿;后天性肾囊肿;主动脉瓣关闭不全;心功能不全	其他	陈龙	应晓洲	应晓洲	髌骨内固定物取出术
690	C04综合病房	2023-01-10	2023-01-12	3318190	卢挚臻	男	23Y	取除骨折内固定装置		其他	王振文	水小龙	218241	踝关节内固定物取出术
691	C04综合病房	2023-01-11	2023-01-12	3318445	王金鹏	男	40Y	取除骨折内固定装置	肾结石;肾钙化;脂肪肝;后天性肾囊肿	其他	陈华	孙辽军	王特	踝关节内固定物取出术
692	C04综合病房	2023-01-14	2023-01-15	3319598	黄兴雨	男	48Y	取除骨折内固定装置	乙型肝炎小三阳	其他	洪建军	余洋	郑亦静	踝关节内固定物取出术
693	C04综合病房	2023-01-14	2023-01-16	3319744	陈绍敢	男	44Y	取除骨折内固定装置	颈椎间盘突出;颈椎关节强硬;脂肪肝	其他	陈龙	应晓洲	应晓洲	跟骨内固定物取出术
694	C04综合病房	2023-01-14	2023-01-16	3319757	姚銮凤	女	66Y	取除骨折内固定装置	肝回声不均	其他	杨雷	周一飞	218371	胫骨内固定物取出术
695	C04综合病房	2023-01-15	2023-01-17	3320516	叶加章	男	64Y	取除骨折内固定装置		其他	余可和	余可和	何自力	髌骨内固定物取出术
696	C04综合病房	2023-01-19	2023-01-21	3321665	谢婕妤	女	10Y	取除骨折内固定装置		其他	陈龙	应晓洲	应晓洲	胫骨内固定物取出术
697	C04综合病房	2023-01-07	2023-01-22	3322380	冉书平	女	44Y	空肠穿孔	腹水;肋骨骨折;肝囊肿;肾结石	治愈	杨越涛	王奕庚	王奕庚	腹腔冲洗检查;空肠破裂修补术
698	C04综合病房	2023-01-21	2023-01-22	3322574	黄爱英	女	36Y	取除骨折内固定装置	肾结石	其他	陈龙	应晓洲	应晓洲	桡骨内固定物取出术
699	C04综合病房	2023-01-21	2023-01-22	3322626	叶晓青	女	46Y	取除骨折内固定装置	肝囊肿;胆管结石伴胆囊炎;肾结石;纤维囊性乳腺病;乳房特指体征和症状	其他	陈龙	应晓洲	应晓洲	尺骨内固定物取出术;桡骨内固定物取出术
700	C04综合病房	2023-01-21	2023-01-23	3322684	王振通	男	53Y	取除骨折内固定装置	脂肪肝;后天性肾囊肿;高血压病	其他	陈龙	应晓洲	应晓洲	胫骨内固定物取出术
701	C04综合病房	2023-01-22	2023-01-24	3323024	麻茂昌	男	51Y	取除骨折内固定装置	脂肪肝;前列腺增生;前列腺结石	其他	余可和	何自力	何自力	股骨内固定物取出术
702	C04综合病房	2023-01-22	2023-01-24	3323492	郑晓鸿	女	37Y	取除骨折内固定装置	肝囊肿;胆囊息肉;肾结石	其他	余可和	何自力	何自力	锁骨内固定物取出术
703	C04综合病房	2023-01-22	2023-01-24	3323493	夏缘博	男	15Y	取除骨折内固定装置		其他	余可和	何自力	何自力	胫骨内固定物取出术
704	C04综合病房	2023-01-23	2023-01-25	3323641	陈启橱	男	43Y	取除骨折内固定装置	具有人工眼;脂肪肝	其他	杨雷	周一飞	218371	踝关节内固定物取出术
705	C04综合病房	2023-01-23	2023-01-25	3323642	谢立通	男	26Y	取除骨折内固定装置		其他	杨雷	周一飞	218371	股骨内固定物取出术
706	C04综合病房	2023-01-23	2023-01-25	3323643	郑丽君	女	33Y	特指指骨骨折		治愈	杨雷	周一飞	218371	指骨骨折切开复位钢针内固定术
707	C04综合病房	2023-01-09	2023-01-25	3323843	胡秀萍	女	56Y	创伤性小肠破裂	腹部损伤;腹水;急性腹膜炎;肋骨骨折;肝回声不均	治愈	王飞海	周磊	218360	腹腔镜检查;小肠破裂修补术
708	C04综合病房	2023-01-23	2023-01-25	3323927	戴安娜	女	11Y	取除骨折内固定装置		其他	洪建军	余洋	郑亦静	瘢痕松解术;踝关节内固定物取出术
709	C04综合病房	2023-01-23	2023-01-25	3323962	翁静静	女	31Y	取除骨折内固定装置		其他	陈龙	应晓洲	应晓洲	外固定装置去除
710	C04综合病房	2023-01-24	2023-01-26	3324104	冯辉	男	33Y	取除骨折内固定装置	后天性肾囊肿	其他	陈龙	应晓洲	应晓洲	踝关节内固定物取出术
711	C04综合病房	2023-01-25	2023-01-27	3324513	林岳	男	45Y	取除骨折内固定装置	高血压病;特指肾盂积水;乙型病毒性肝炎	其他	王振文	水小龙	218241	肩胛骨内固定物取出术
712	C04综合病房	2023-01-26	2023-01-28	3324723	潘渊静	女	23Y	取除骨折内固定装置	原发性单侧膝关节病	其他	陈龙	应晓洲	应晓洲	胫骨内固定物取出术
713	C04综合病房	2023-01-26	2023-01-28	3324724	王彰韩	男	15Y	取除骨折内固定装置	脂肪肝	其他	陈龙	应晓洲	应晓洲	股骨内固定物取出术
714	C04综合病房	2023-01-26	2023-01-28	3324727	陈祖巩	男	35Y	取除骨折内固定装置	脂肪肝;胆囊结石	其他	陈龙	应晓洲	应晓洲	胫骨内固定物取出术
715	C04综合病房	2023-01-28	2023-01-29	3325328	潘泓博	男	12Y	取除骨折内固定装置		其他	洪建军	余洋	郑亦静	桡骨内固定物取出术;尺骨内固定物取出术
716	C04综合病房	2023-01-28	2023-01-29	3325371	赵晴晴	女	13Y	取除骨折内固定装置		其他	洪建军	余洋	郑亦静	桡骨内固定物取出术
717	C04综合病房	2023-01-28	2023-01-29	3325601	徐彪	男	12Y	取除骨折内固定装置	脂肪肝	其他	陈龙	应晓洲	应晓洲	桡骨内固定物取出术;尺骨内固定物取出术
718	C04综合病房	2023-01-28	2023-01-30	3325744	戴建涛	男	52Y	取除骨折内固定装置	陈旧性肋骨骨折;脂肪肝;后天性肾囊肿;肾结石;前列腺结石	其他	陈龙	应晓洲	应晓洲	肩胛骨内固定物取出术
719	C04综合病房	2023-01-28	2023-01-30	3325747	徐嘉豪	男	10Y	取除骨折内固定装置		其他	余可和	余可和	何自力	瘢痕松解术;桡骨内固定物取出术
720	C04综合病房	2023-01-28	2023-01-30	3325748	张林密	女	35Y	取除骨折内固定装置		其他	余可和	余可和	何自力	瘢痕松解术;股骨内固定物取出术
721	C04综合病房	2023-01-30	2023-02-01	3326862	陈照柱	男	47Y	取除骨折内固定装置	肝钙化灶;前列腺增生;前列腺结石;脂肪肝	其他	杨雷	周一飞	218371	跖骨内固定物取出术
722	C04综合病房	2023-01-28	2023-02-01	3327077	薛盛绘	男	43Y	颈椎骨折	颈椎间盘突出;胸椎骨折;腰椎骨折;椎间盘膨隆;多发性肋骨骨折	好转	倪仲琳	倪仲琳	潘传孟
723	C04综合病房	2023-01-31	2023-02-01	3327232	虞崇昊	男	15Y	取除骨折内固定装置		其他	陈龙	应晓洲	应晓洲	桡骨内固定物取出术;尺骨内固定物取出术
724	C04综合病房	2023-02-01	2023-02-02	3327433	尤乐峰	男	24Y	取除骨折内固定装置		其他	洪建军	余洋	郑亦静	锁骨内固定物取出术
725	C04综合病房	2023-01-31	2023-02-02	3327437	王作豪	男	20Y	取除骨折内固定装置	肝回声不均	其他	杨雷	周一飞	218371	尺骨内固定物取出术
726	C04综合病房	2023-02-01	2023-02-02	3327839	伍海燕	女	54Y	取除骨折内固定装置		其他	余可和	余可和	何自力	瘢痕松解术;肩锁关节内固定物取出术
727	C04综合病房	2023-02-02	2023-02-03	3328076	郑贺伟	男	12Y	取除骨折内固定装置		其他	陈龙	应晓洲	应晓洲	肱骨内固定物取出术
728	C04综合病房	2023-02-02	2023-02-03	3328079	曹启洧	男	34Y	取除骨折内固定装置	脂肪肝;胆囊息肉;肾结石	其他	陈龙	应晓洲	应晓洲	桡骨内固定物取出术
729	C04综合病房	2023-02-02	2023-02-03	3328083	杨平贵	男	55Y	取除骨折内固定装置	胆囊息肉;脂肪肝	其他	陈龙	应晓洲	应晓洲	锁骨内固定物取出术
730	C04综合病房	2023-01-14	2023-02-04	3328645	陈显忠	男	54Y	胃动脉损伤	髋关节半脱位;头皮挫伤;胰损伤;肝损伤;肠系膜裂伤;失血性休克;肝内胆管结石;髋臼骨折;髋和大腿水平坐骨神经损伤;十二指肠损伤;胃损伤;腹部损伤	好转	杨越涛	王奕庚	王奕庚	十二指肠破裂修补术;胃十二指肠动脉栓塞术;肝破裂修补术;肠系膜上动脉造影;腹主动脉造影;剖腹探查术;坐骨神经探查术;髋关节囊松解术;髋关节脱位切开复位内固定术;髋骨骨折切开复位钢板内固定术;肝病损切除术;肠系膜修补术;胰腺破裂修补术
731	C04综合病房	2023-01-10	2023-02-09	3329373	常天志	男	48Y	创伤性肠破裂	腹水;前列腺钙化灶;腰椎骨折;肝囊肿;创伤性肠系膜静脉破裂	治愈	杨越涛	王奕庚	王奕庚	小肠部分切除术;小肠-小肠端侧吻合术;剖腹探查术;肠系膜病损切除术;肠系膜修补术
732	C04综合病房	2023-02-11	2023-02-13	3330207	陈爱梅	女	56Y	取除骨折内固定装置	高血压病	其他	陈龙	应晓洲	应晓洲	锁骨内固定物取出术
733	C04综合病房	2023-02-11	2023-02-13	3330208	何显龙	男	58Y	取除骨折内固定装置		其他	陈龙	应晓洲	应晓洲	股骨内固定物取出术
734	C04综合病房	2023-02-11	2023-02-13	3330210	朱小义	男	52Y	取除骨折内固定装置	脂肪肝;肝回声不均;胆囊息肉	其他	陈龙	应晓洲	应晓洲	踝关节内固定物取出术
735	C04综合病房	2023-02-12	2023-02-14	3330872	金可相	男	48Y	取除骨折内固定装置	后天性肾囊肿;前列腺结石;下肢动脉粥样硬化	其他	余可和	余可和	何自力	瘢痕松解术;胫骨内固定物取出术
736	C04综合病房	2023-02-12	2023-02-14	3330874	殷煜凯	男	18Y	取除骨折内固定装置		其他	余可和	余可和	何自力	瘢痕松解术;踝关节内固定物取出术
737	C04综合病房	2023-02-15	2023-02-17	3331833	温怀嫩	男	33Y	取除骨折内固定装置		其他	余可和	余可和	何自力	瘢痕松解术;桡骨内固定物取出术
738	C04综合病房	2023-02-16	2023-02-18	3331998	卢海敏	男	21Y	取除骨折内固定装置	肝回声不均	其他	陈龙	应晓洲	应晓洲	股骨内固定物取出术
739	C04综合病房	2023-02-16	2023-02-18	3331999	陈文卓	男	9Y	取除骨折内固定装置	后天性肾囊肿	其他	陈龙	应晓洲	应晓洲	胫骨内固定物取出术
740	C04综合病房	2023-02-16	2023-02-18	3332000	马超	男	35Y	取除骨折内固定装置	脂肪肝	其他	陈龙	应晓洲	应晓洲	尺骨内固定物取出术
741	C04综合病房	2023-02-18	2023-02-20	3333068	周步乐	女	59Y	取除骨折内固定装置	脂肪肝;胆囊结石;后天性肾囊肿;高血压病	其他	陈龙	应晓洲	应晓洲	桡骨内固定物取出术;胫骨内固定物取出术;踝关节内固定物取出术
742	C04综合病房	2023-02-18	2023-02-20	3333077	吴国信	男	49Y	取除骨折内固定装置	脂肪肝	其他	陈龙	应晓洲	应晓洲	踝关节内固定物取出术
743	C04综合病房	2023-02-18	2023-02-20	3333080	徐茶花	女	54Y	取除骨折内固定装置	后天性肾囊肿	其他	陈龙	应晓洲	应晓洲	锁骨内固定物取出术
744	C04综合病房	2023-02-18	2023-02-20	3333084	陈雪琴	女	58Y	取除骨折内固定装置	脂肪肝	其他	陈龙	应晓洲	应晓洲	腓骨内固定物取出术;胫骨内固定物取出术;踝关节内固定物取出术
745	C04综合病房	2023-02-21	2023-02-23	3334297	李以蒙	男	32Y	取除骨折内固定装置	脂肪肝;胆囊息肉	其他	陈龙	应晓洲	应晓洲	锁骨内固定物取出术
746	C04综合病房	2023-02-21	2023-02-23	3334303	洪秋红	女	62Y	取除骨折内固定装置	幽门螺旋杆菌感染	其他	陈龙	应晓洲	应晓洲	胫骨内固定物取出术
747	C04综合病房	2023-01-31	2023-02-23	3334582	邹培德	男	87Y	股骨粗隆间骨折	腹壁肠瘘;肠吻合口狭窄;手术后切口感染;结肠息肉;高血压病	治愈	孔建中	方文来	陈墨川	股骨骨折闭合复位螺钉内固定术
748	C04综合病房	2023-02-22	2023-02-24	3334630	张维辉	男	48Y	取除骨折内固定装置	脂肪肝;前列腺增生	其他	杨雷	周一飞	218371	踝关节内固定物取出术
749	C04综合病房	2023-02-22	2023-02-24	3334632	陈爱微	女	40Y	取除骨折内固定装置	肝回声不均	其他	杨雷	周一飞	218371	桡骨内固定物取出术
750	C04综合病房	2023-02-23	2023-02-25	3335024	吴阿香	女	60Y	取除骨折内固定装置	脂肪肝;肺结节	其他	翁益民	翁益民	项光恒	踝关节内固定物取出术
751	C04综合病房	2023-02-23	2023-02-25	3335097	黄莲莲	女	56Y	取除骨折内固定装置	2型糖尿病;脂肪肝	其他	翁益民	翁益民	项光恒	跖骨内固定物取出术
752	C04综合病房	2023-02-23	2023-02-25	3335206	李银	女	18Y	取除骨折内固定装置	窦性心律失常	其他	翁益民	项光恒	项光恒	瘢痕松解术;尺骨内固定物取出术
753	C04综合病房	2023-02-25	2023-02-27	3335850	许肖青	女	53Y	特指指骨骨折		治愈	陈龙	应晓洲	应晓洲	指骨骨折闭合复位钢针内固定术
754	C04综合病房	2023-02-26	2023-02-27	3336098	张玉妹	女	71Y	取除骨折内固定装置	脂肪肝;后天性肾囊肿;下肢动脉粥样硬化	其他	陈华	孙辽军	王特	踝关节内固定物取出术
755	C04综合病房	2023-02-26	2023-02-28	3336173	郑书快	男	39Y	取除骨折内固定装置	前列腺结石	其他	余可和	余可和	何自力	瘢痕松解术;胫骨内固定物取出术
756	C04综合病房	2023-02-26	2023-02-28	3336174	胡绍南	男	66Y	取除骨折内固定装置	脂肪肝;肝囊肿;后天性肾囊肿;前列腺增生;前列腺结石;下肢动脉粥样硬化;高血压病	其他	余可和	余可和	何自力	瘢痕松解术;腓骨内固定物取出术
757	C04综合病房	2023-02-27	2023-03-01	3336882	南燕丹	女	43Y	取除骨折内固定装置		其他	水小龙	水小龙	218241	胫骨内固定物取出术
758	C04综合病房	2023-02-28	2023-03-02	3337104	赵桐洁	女	22Y	取除骨折内固定装置		其他	赵友明	赵友明	柯陈荣	锁骨内固定物取出术
759	C04综合病房	2023-02-28	2023-03-02	3337233	李永顺	男	45Y	取除骨折内固定装置	前列腺结石;前列腺增生;胆囊息肉	其他	翁益民	翁益民	项光恒	胫骨内固定物取出术
760	C04综合病房	2023-02-28	2023-03-02	3337244	林丽芬	女	60Y	取除骨折内固定装置		其他	翁益民	翁益民	项光恒	桡骨内固定物取出术
761	C04综合病房	2023-02-28	2023-03-02	3337252	朱明哲	男	42Y	取除骨折内固定装置	肾结石;肾错构瘤;前列腺结石;前列腺增生;脂肪肝	其他	翁益民	翁益民	项光恒	踝关节内固定物取出术
762	C04综合病房	2023-02-27	2023-03-02	3337276	李世荣	女	60Y	取除骨折内固定装置	创伤后单侧膝关节病	其他	陈华	孙辽军	王特	胫骨内固定物取出术
763	C04综合病房	2022-11-18	2023-03-03	3337461	邬微微	女	71Y	结肠恶性肿瘤	高血压;多器官功能障碍综合征(MODS);病理性骨折;直肠息肉;多浆膜腔积液;不完全性肠梗阻;肺部感染;腹腔继发恶性肿瘤;骨继发恶性肿瘤;肝继发恶性肿瘤;肺继发恶性肿瘤;特指手术后状态;肾结石;感染性休克	死亡	倪仲琳	黄和	潘传孟	结肠造口术;腹腔粘连松解术;腹腔冲洗检查
764	C04综合病房	2023-02-28	2023-03-04	3337885	姜朱平	男	42Y	取除骨折内固定装置	后天性肾囊肿;肾结石;前列腺结石	其他	陈龙	应晓洲	应晓洲	踝关节内固定物取出术
765	C04综合病房	2023-03-04	2023-03-05	3338361	刘军军	男	37Y	取除骨折内固定装置		其他	陈龙	应晓洲	应晓洲	髌骨内固定物取出术
766	C04综合病房	2023-03-04	2023-03-06	3338558	廖财乐	男	21Y	取除骨折内固定装置		其他	陈龙	应晓洲	应晓洲	尺骨内固定物取出术
767	C04综合病房	2023-03-06	2023-03-08	3339614	傅细女	女	53Y	取除骨折内固定装置		其他	杨雷	周一飞	218371	尺骨内固定物取出术;掌骨内固定物取出术
768	C04综合病房	2023-03-06	2023-03-08	3339618	王吕	男	34Y	取除骨折内固定装置		其他	杨雷	周一飞	218371	胫骨内固定物取出术
769	C04综合病房	2023-03-06	2023-03-08	3339673	吴小忠	男	41Y	取除骨折内固定装置	胆囊息肉	其他	陈龙	应晓洲	应晓洲	股骨内固定物取出术
770	C04综合病房	2023-03-07	2023-03-09	3340097	林圣条	男	44Y	取除骨折内固定装置	前列腺结石	其他	冯永增	冯永增	何自力	锁骨内固定物取出术
771	C04综合病房	2023-03-07	2023-03-09	3340141	孙德朋	男	56Y	取除骨折内固定装置	肝回声不均;心律失常;肝血管瘤	其他	陈龙	应晓洲	应晓洲	胫骨内固定装置去除术
772	C04综合病房	2023-03-07	2023-03-09	3340142	梅文华	男	46Y	取除骨折内固定装置	肝回声不均	其他	陈龙	应晓洲	应晓洲	胫骨内固定装置去除术;锁骨内固定装置去除术
773	C04综合病房	2023-03-05	2023-03-09	3340190	章斌君	男	33Y	取除骨折内固定装置	脂肪肝	其他	余可和	余可和	218019	尺骨内固定物取出术;桡骨内固定物取出术
774	C04综合病房	2023-02-12	2023-03-11	3340858	吴翠兰	女	87Y	股骨颈骨折	慢性阻塞性肺病;嵌顿性股疝;心律失常;高血压病;陈旧性肋骨骨折;陈旧性脊柱骨折;类风湿性关节炎;食管裂孔疝;肺部感染;甲状腺结节;后天性肾囊肿	治愈	杨越涛	王奕庚	218362	人工股骨头置换术;单侧腹股沟疝修补术
775	C04综合病房	2023-03-11	2023-03-12	3341292	张连华	女	56Y	取除骨折内固定装置	肝囊肿	其他	陈龙	应晓洲	应晓洲	桡骨内固定装置去除术
776	C04综合病房	2023-03-11	2023-03-13	3341402	曾细娥	女	65Y	取除骨折内固定装置	后天性肾囊肿;高血压病;腰椎骨折;骨质疏松	其他	陈龙	应晓洲	应晓洲	肱骨内固定装置去除术
777	C04综合病房	2023-03-13	2023-03-14	3342190	王贤微	男	72Y	掌骨骨折	非风湿性二尖瓣关闭不全;退行性主动脉瓣疾患;下肢静脉曲张	好转	陈华	孙辽军	王特	掌骨骨折切开复位钢板内固定术;关节软骨修复术
778	C04综合病房	2023-03-13	2023-03-15	3342349	陈常概	男	46Y	取除外固定装置	肾结石;骨折治疗后恢复期;前列腺结石;前列腺增生;胆囊息肉;脂肪肝	其他	杨雷	周一飞	218371	桡骨内固定装置去除术
779	C04综合病房	2023-03-13	2023-03-15	3342395	王良寅	男	40Y	取除骨折内固定装置	胆囊息肉;前列腺结石	其他	杨雷	周一飞	218371	胫骨内固定装置去除术
780	C04综合病房	2023-03-15	2023-03-16	3342995	吴建春	男	41Y	取除骨折内固定装置		其他	洪建军	余洋	郑亦静	桡骨内固定装置去除术
781	C04综合病房	2023-03-15	2023-03-16	3342999	梁亦追	男	46Y	取除骨折内固定装置		其他	洪建军	余洋	郑亦静	跟骨内固定物取出术
782	C04综合病房	2023-03-15	2023-03-17	3343232	林青云	男	54Y	取除骨折内固定装置	1型糖尿病;陈旧性肋骨骨折;脂肪肝;心功能不全	其他	余可和	余可和	218019	锁骨内固定装置去除术;瘢痕单纯切除,Z字改形修复术
783	C04综合病房	2023-03-16	2023-03-18	3343698	郭彩虹	女	55Y	肱骨外科颈骨折	肾错构瘤;肝囊肿;肩袖损伤	治愈	陈龙	应晓洲	应晓洲	肱骨骨折切开复位钢板内固定术;肩袖修补术
784	C04综合病房	2023-03-18	2023-03-20	3344419	孔令东	男	49Y	取除骨折内固定装置	肝回声不均	其他	陈龙	应晓洲	应晓洲	掌骨内固定装置去除术
785	C04综合病房	2023-03-21	2023-03-22	3345507	徐盛	男	30Y	取除骨折内固定装置	肝下垂	其他	陈龙	应晓洲	应晓洲	肱骨内固定装置去除术
786	C04综合病房	2023-03-21	2023-03-23	3345782	杨世永	男	45Y	取除骨折内固定装置	乙型病毒性肝炎	其他	杨雷	周一飞	218371	跖骨内固定装置去除术
787	C04综合病房	2023-03-11	2023-03-27	3345902	杨德金	男	90Y	胆管结石伴胆管炎	陈旧性胫骨骨折;风湿病;胆囊结石伴急性胆囊炎;脂肪肝;肺部感染;胸腔积液;后天性肾囊肿;前列腺钙化灶;高血压病	治愈	杨越涛	王奕庚	王奕庚	经皮肝穿刺胆管造影;胆囊造口术;经皮肝穿刺胆管引流术;经皮胆道镜下取石术
788	C04综合病房	2023-03-25	2023-03-27	3347132	陈胜军	男	42Y	取除骨折内固定装置	脂肪肝	其他	陈龙	应晓洲	应晓洲	跟骨内固定物取出术
789	C04综合病房	2023-03-25	2023-03-27	3347134	陈飞	男	56Y	取除骨折内固定装置	肝回声不均	其他	陈龙	应晓洲	应晓洲	锁骨内固定装置去除术
790	C04综合病房	2023-03-11	2023-03-30	3348726	徐平刚	男	41Y	创伤性肝破裂	多发性肋骨骨折;胆囊结石;腹水;肺水肿;胸腔积液;肾上腺损伤	好转	杨越涛	王奕庚	王奕庚	经皮肝穿刺引流术;开腹探查术;腹腔穿刺引流术;肝破裂修补术
791	C04综合病房	2023-03-29	2023-03-31	3348875	刘景旭	男	18Y	取除骨折内固定装置	前列腺结石;脂肪肝	其他	余可和	余可和	218019	踝关节内固定装置去除术
792	C04综合病房	2023-03-22	2023-04-04	3350688	谷建德	男	59Y	创伤性脾破裂	下肢动脉粥样硬化;静脉栓塞和血栓形成;腰椎退行性病变;腹腔积血;肋骨骨折;肺部感染;支气管扩张;陈旧性肺结核	治愈	王飞海	周磊	218360	脾切开术;腹腔穿刺引流术
793	C04综合病房	2023-04-03	2023-04-05	3350964	邹立晓	女	30Y	取除骨折内固定装置		其他	杨雷	胡炜	218371	踝关节内固定装置去除术
794	C04综合病房	2023-04-08	2023-04-09	3352216	郑炳候	男	63Y	取除骨折内固定装置	后天性肾囊肿;肾结石;肝囊肿;脂肪肝;心功能不全	其他	陈华	陈华	王特	髌骨内固定装置去除术
795	C04综合病房	2023-04-08	2023-04-10	3352519	李玉梅	女	52Y	取除骨折内固定装置	肾结石;肝回声不均;胆囊结石;高血压病;POEMS综合征;脾大	其他	陈龙	应晓洲	应晓洲	髌骨内固定装置去除术
796	C04综合病房	2023-04-08	2023-04-10	3352522	陈瑜	男	30Y	取除骨折内固定装置		其他	陈龙	应晓洲	应晓洲	股骨内固定装置去除术
797	C04综合病房	2023-04-08	2023-04-10	3352564	王阿香	女	56Y	取除骨折内固定装置		其他	洪建军	余洋	郑亦静	胫骨内固定装置去除术
798	C04综合病房	2023-03-07	2023-04-11	3353129	冉小花	女	18Y	创伤性肝破裂	失血性休克;创伤性气胸;肋骨骨折;腹水	治愈	王飞海	周磊	218360	肝破裂修补术;腹腔冲洗检查
799	C04综合病房	2023-04-10	2023-04-11	3353251	潘教通	男	49Y	取除骨折内固定装置	胆囊结石;高血压病;脂肪肝	其他	杨雷	胡炜	218371	尺骨内固定装置去除术
800	C04综合病房	2023-04-11	2023-04-11	3353336	徐承昊	男	6Y	鼻骨骨折		治愈	刘学军	倪丽艳	218257	鼻骨折闭合性复位术
801	C04综合病房	2023-04-11	2023-04-12	3353686	蔡春妹	女	58Y	取除骨折内固定装置		其他	洪建军	余洋	郑亦静	趾骨内固定装置去除术
802	C04综合病房	2023-04-11	2023-04-13	3353893	仇荷花	女	55Y	取除骨折内固定装置		其他	陈龙	应晓洲	应晓洲	尺骨内固定装置去除术
803	C04综合病房	2023-04-12	2023-04-14	3354158	陈国秋	女	51Y	取除骨折内固定装置		其他	余可和	余可和	218019	髌骨内固定装置去除术
804	C04综合病房	2023-04-12	2023-04-14	3354159	金胜凯	男	31Y	取除骨折内固定装置		其他	余可和	余可和	218019	踝关节内固定装置去除术
805	C04综合病房	2023-04-13	2023-04-15	3354517	吴继阳	男	52Y	取除骨折内固定装置	后天性肾囊肿;脂肪肝;胆囊息肉;前列腺结石	其他	武垚森	王胜	武垚森	脊柱内固定装置去除术
806	C04综合病房	2023-04-13	2023-04-15	3354609	向兵	男	39Y	取除骨折内固定装置		其他	杨雷	胡炜	218371	桡骨内固定装置去除术;外固定装置取出术
807	C04综合病房	2023-04-15	2023-04-17	3355388	王秋兰	女	66Y	取除骨折内固定装置	膝关节病;心功能不全;脂肪肝;主动脉瓣关闭不全	其他	陈龙	应晓洲	应晓洲	胫骨内固定装置去除术
808	C04综合病房	2023-04-15	2023-04-17	3355389	陈佩雷	女	32Y	取除骨折内固定装置	肝回声不均	其他	陈龙	应晓洲	应晓洲	尺骨内固定装置去除术
809	C04综合病房	2023-04-15	2023-04-17	3355573	程晓东	男	48Y	取除骨折内固定装置	脂肪肝	其他	陈华	孙辽军	王特	肩锁关节内固定物取出术
810	C04综合病房	2023-04-15	2023-04-18	3356097	刘静	女	48Y	取除骨折内固定装置	胆囊息肉;肝囊肿	其他	杨雷	胡炜	218371	踝关节内固定装置去除术
811	C04综合病房	2023-04-17	2023-04-19	3356271	洪涛	男	41Y	取除骨折内固定装置	肝回声不均	其他	杨雷	胡炜	218371	踝关节内固定装置去除术
812	C04综合病房	2023-04-18	2023-04-20	3356936	林甲銮	男	35Y	取除骨折内固定装置	脂肪肝;慢性乙型病毒性肝炎	其他	陈华	孙辽军	王特	肱骨内固定装置去除术
813	C04综合病房	2023-04-19	2023-04-21	3357008	杨小荣	女	54Y	取除骨折内固定装置	胆囊结石	其他	水小龙	水小龙	218241	踝关节内固定装置去除术
814	C04综合病房	2023-04-20	2023-04-22	3357608	钱靖博	男	15Y	桡骨骨折		治愈	陈龙	应晓洲	应晓洲	桡骨骨折切开复位钢板内固定术
815	C04综合病房	2023-04-22	2023-04-23	3358065	李丽丽	女	30Y	取除骨折内固定装置	脂肪肝	其他	洪建军	余洋	郑亦静	胫骨内固定装置去除术;跖骨内固定装置去除术;跗骨内固定装置去除术
816	C04综合病房	2023-04-22	2023-04-24	3358232	王怀贵	男	55Y	取除骨折内固定装置	酒精性肝硬化	其他	陈龙	应晓洲	应晓洲	胫骨内固定装置去除术
817	C04综合病房	2023-04-22	2023-04-24	3358258	许建财	男	41Y	取除骨折内固定装置	脂肪肝	其他	陈龙	陈龙	应晓洲	胫骨内固定装置去除术
818	C04综合病房	2023-04-22	2023-04-24	3358359	陈笑萍	女	62Y	取除骨折内固定装置	肝囊肿	其他	陈龙	陈龙	应晓洲	跖骨内固定装置去除术
819	C04综合病房	2023-04-19	2023-04-25	3357009	张明清	女	37Y	取除骨折内固定装置		其他	水小龙	水小龙	218241	踝关节内固定装置去除术;皮肤瘢痕切除术
820	C04综合病房	2023-04-24	2023-04-26	3359383	黄忠昌	男	65Y	取除骨折内固定装置	后天性肾囊肿;肝囊肿	其他	水小龙	水小龙	218241	胫骨内固定装置去除术
821	C04综合病房	2023-04-23	2023-04-26	3359449	王友芬	男	67Y	单侧腹股沟斜疝	多发性脑梗死;肺纤维化;椎骨病变;高血压病;头皮血肿;肺挫伤;肋骨骨折;附睾囊肿;气胸;肺大泡;后天性肾囊肿;肾结石	治愈	杨越涛	杨越涛	218360	腹腔镜下单侧腹股沟斜疝无张力修补术
822	C04综合病房	2023-04-26	2023-04-27	3359870	杨义力	男	6Y	取除骨折内固定装置		其他	洪建军	余洋	郑亦静	股骨内固定装置去除术
823	C04综合病房	2023-04-26	2023-04-27	3359874	林秀芬	女	59Y	取除骨折内固定装置		其他	洪建军	余洋	郑亦静	踝关节内固定装置去除术
824	C04综合病房	2023-04-26	2023-04-28	3359896	南向阳	男	59Y	取除骨折内固定装置	高血压病	其他	洪建军	余洋	郑亦静	胫骨内固定装置去除术
825	C04综合病房	2023-04-29	2023-04-30	3360943	周建国	男	63Y	取除骨折内固定装置	后天性肾囊肿;肝囊肿	其他	陈龙	应晓洲	应晓洲	锁骨内固定装置去除术
826	C04综合病房	2023-04-29	2023-04-30	3361161	叶洪莲	女	56Y	取除骨折内固定装置	膀胱钙化;后天性肾囊肿;肾结石;高血压病;肾萎缩	其他	陈龙	应晓洲	应晓洲	踝关节内固定装置去除术
827	C04综合病房	2023-04-17	2023-04-30	3361164	郑加斌	男	76Y	腹壁切口疝	肾结石;肌萎缩;下肢动脉粥样硬化;脊柱侧弯;高血压病;腰椎骨折;肝囊肿	治愈	杨越涛	王奕庚	218360	腹壁切口疝无张力修补术
828	C04综合病房	2023-04-29	2023-04-30	3361166	张楠	男	22Y	取除骨折内固定装置	后天性肾囊肿;脂肪肝	其他	陈龙	应晓洲	应晓洲	腓骨内固定装置去除术
829	C04综合病房	2023-04-25	2023-04-30	3361189	林青生	男	65Y	肠梗阻	直肠恶性肿瘤;大网膜继发恶性肿瘤;后天性肾囊肿;肾衰竭;脂肪肝;股骨头无菌性坏死;骨折治疗后恢复期;结肠造口状态	好转	倪仲琳	黄和	姚志超
830	C04综合病房	2023-04-29	2023-05-01	3361471	曾国聪	男	46Y	取除骨折内固定装置	前列腺结石;胆囊结石;胆囊炎	其他	陈龙	应晓洲	应晓洲	胫骨内固定装置去除术
831	C04综合病房	2023-04-25	2023-05-02	3361820	张文选	男	78Y	双侧腹股沟疝（一侧直疝、一侧斜疝）	心动过缓;下肢动脉粥样硬化;胆囊结石;陈旧性肋骨骨折;肩胛骨骨折;胆囊息肉;糖尿病;肺结节	治愈	杨越涛	王奕庚	徐训政	腹腔镜下单侧腹股沟疝修补术;腹腔镜下胆囊切除术
832	C04综合病房	2023-04-26	2023-05-03	3362042	金玉香	女	78Y	胆囊结石伴慢性胆囊炎	肾结石;脑血管病后遗症;腹腔内器官良性脂肪瘤样肿瘤;高血压病;老年性脑萎缩;股骨颈骨折;肺结节	治愈	吴伟军	邓应彬	邓应彬	腹腔镜下胆囊切除术
833	C04综合病房	2023-04-18	2023-05-06	3363087	陈吾昌	男	84Y	创伤性脾破裂	失血性休克;多发性肋骨骨折;心房颤动;腹水;前列腺增生;脂肪肝;冠状动脉粥样硬化性心脏病	治愈	杨越涛	王奕庚	徐训政	腹腔镜全脾切除术
834	C04综合病房	2023-05-05	2023-05-07	3363359	蒋招定	男	49Y	取除骨折内固定装置	单关节炎	其他	洪建军	余洋	郑亦静	胫骨内固定装置去除术
835	C04综合病房	2023-05-05	2023-05-07	3363373	金送蕊	女	68Y	取除骨折内固定装置		其他	洪建军	余洋	郑亦静	跖骨内固定装置去除术;踝关节内固定装置去除术
836	C04综合病房	2023-05-06	2023-05-07	3363497	郑寿建	男	64Y	取除骨折内固定装置	糖尿病	其他	洪建军	余洋	郑亦静	踝关节内固定装置去除术
837	C04综合病房	2023-05-06	2023-05-07	3363498	王晓萍	女	32Y	取除骨折内固定装置		其他	洪建军	余洋	郑亦静	跟骨内固定物取出术
838	C04综合病房	2023-05-03	2023-05-07	3363526	吴德清	男	85Y	肠梗阻	特指肾盂积水;胆囊切除术后状态;盆腔淋巴结继发性恶性肿瘤;陈旧性肱骨骨折;输尿管腹壁瘘;膀胱恶性肿瘤;陈旧性肺结核;特指手术后状态	好转	吴伟军	邓应彬	邓应彬
839	C04综合病房	2023-05-06	2023-05-08	3363644	姜洪	男	29Y	取除骨折内固定装置	肝钙化灶	其他	陈龙	应晓洲	应晓洲	股骨内固定装置去除术
840	C04综合病房	2023-05-06	2023-05-08	3363645	叶球林	男	25Y	取除骨折内固定装置		其他	陈龙	应晓洲	应晓洲	跖骨内固定装置去除术
841	C04综合病房	2023-05-06	2023-05-08	3363653	徐蓁蓁	女	62Y	取除骨折内固定装置	主动脉钙化;脂肪肝	其他	陈龙	应晓洲	应晓洲	髌骨内固定装置去除术
842	C04综合病房	2023-05-05	2023-05-10	3364636	朱人杰	男	42Y	急性胰腺炎	后天性肾囊肿;骨折治疗后恢复期;腹水;胆总管扩张;胆囊结石伴慢性胆囊炎;肝钙化灶	好转	倪仲琳	黄和	姚志超
843	C04综合病房	2023-04-29	2023-05-10	3364817	张正林	男	50Y	创伤性脾破裂	胸腔积液;后天性肾囊肿;肋骨骨折;胆囊结石;腹股沟斜疝;脂肪肝;腹水	治愈	倪仲琳	黄和	姚志超	腹腔冲洗检查;全脾切除术
844	C04综合病房	2023-04-24	2023-05-10	3364834	陈芝良	男	55Y	创伤性肝破裂	高血压病;肋骨骨折;腹腔积血;失血性休克	治愈	倪仲琳	黄和	姚志超	腹腔穿刺引流术;开腹探查术;肝破裂修补术
845	C04综合病房	2023-05-08	2023-05-11	3365093	肖彦墨	女	19Y	取除骨折内固定装置	后天性肾囊肿;1型糖尿病	其他	水小龙	水小龙	周呈伟	踝关节内固定装置去除术
846	C04综合病房	2023-04-29	2023-05-11	3365219	历爱兰	女	58Y	不完全性肠梗阻	肾结石;子宫切除术后状态;后天性肾囊肿;糖尿病;脂肪肝;高血压病;骨折治疗后恢复期	治愈	倪仲琳	黄和	姚志超	结肠镜检查;胃镜检查
847	C04综合病房	2023-05-10	2023-05-12	3365342	朱冬花	女	57Y	取除骨折内固定装置		其他	冯永增	冯永增	蔡乐益	髌骨内固定装置去除术
848	C04综合病房	2023-05-09	2023-05-12	3365366	徐玉琴	女	64Y	取除骨折内固定装置	脂肪肝	其他	翁益民	翁益民	项光恒	锁骨内固定装置去除术
849	C04综合病房	2023-05-11	2023-05-13	3365955	郭美翠	女	58Y	取除骨折内固定装置	甲状腺结节	其他	水小龙	水小龙	周呈伟	髌骨内固定装置去除术
850	C04综合病房	2023-05-12	2023-05-14	3366381	兰金生	男	51Y	腓骨骨折累及踝关节	小腿水平腓神经损伤;开放性小腿特指部位损伤;肾结石;高血压病;2型糖尿病;趾伸肌腱断裂	治愈	陈龙	应晓洲	应晓洲	踝关节骨折切开复位钢针内固定术
851	C04综合病房	2023-05-13	2023-05-15	3366816	汪飞飞	女	56Y	取除骨折内固定装置		其他	洪建军	余洋	郑亦静	胫骨内固定装置去除术
852	C04综合病房	2023-05-14	2023-05-15	3366932	李阿菊	女	62Y	取除骨折内固定装置	膝关节退行性病变;高血压病;高脂血症	其他	余可和	余可和	王少华2	外固定装置取出术
853	C04综合病房	2023-05-15	2023-05-16	3367328	杜武龙	男	23Y	取除骨折内固定装置	肝钙化灶;肾结石	其他	水小龙	水小龙	周呈伟	踝关节内固定装置去除术
854	C04综合病房	2023-05-15	2023-05-17	3367774	高保杰	男	55Y	取除骨折内固定装置		其他	水小龙	王振文	周呈伟	跟骨内固定物取出术
855	C04综合病房	2023-05-16	2023-05-17	3367920	南建梁	男	48Y	取除骨折内固定装置	慢性乙型病毒性肝炎	其他	余可和	余可和	王少华2	掌骨内固定装置去除术
856	C04综合病房	2023-05-16	2023-05-18	3367992	连余锋	男	46Y	取除骨折内固定装置	后天性肾囊肿;脂肪肝	其他	陈龙	陈龙	应晓洲	踝关节内固定装置去除术
857	C04综合病房	2023-05-16	2023-05-18	3367993	邓娥秀	女	55Y	取除骨折内固定装置	肾结石;脂肪肝	其他	陈龙	陈龙	应晓洲	胫骨内固定装置去除术
858	C04综合病房	2023-05-16	2023-05-18	3368264	吴有吕	男	43Y	股骨颈骨折	骨折治疗后恢复期;胆囊结石	治愈	水小龙	水小龙	周呈伟	股骨骨折闭合复位螺钉内固定术
859	C04综合病房	2023-05-18	2023-05-18	3368267	张建新	男	57Y	取除骨折内固定装置		其他	陈龙	陈龙	应晓洲	腓骨内固定装置去除术
860	C04综合病房	2023-05-17	2023-05-19	3368392	陈丽微	女	44Y	取除骨折内固定装置	肝囊肿;脂肪肝	其他	石成弟	石成弟	卢迪	桡骨内固定装置去除术
861	C04综合病房	2023-05-17	2023-05-19	3368393	郑贤德	男	46Y	取除骨折内固定装置	后天性肾囊肿;高血压病;前列腺增生;脂肪肝	其他	石成弟	石成弟	卢迪	尺骨内固定装置去除术
862	C04综合病房	2023-05-18	2023-05-20	3368734	王艺潓	女	28Y	取除骨折内固定装置		其他	陈龙	应晓洲	应晓洲	胫骨内固定装置去除术
863	C04综合病房	2023-05-18	2023-05-20	3368757	陈光红	男	52Y	取除骨折内固定装置	脂肪肝;胆囊结石	其他	陈龙	应晓洲	应晓洲	跟骨内固定物取出术
864	C04综合病房	2023-05-18	2023-05-20	3368844	常浩	男	41Y	取除骨折内固定装置	肾结石	其他	陈龙	陈龙	应晓洲	锁骨内固定装置去除术;肩胛骨内固定装置去除术
865	C04综合病房	2023-05-18	2023-05-20	3368850	张积弟	男	69Y	取除骨折内固定装置	后天性肾囊肿	其他	陈龙	应晓洲	应晓洲	胫骨内固定装置去除术
866	C04综合病房	2023-05-20	2023-05-21	3369370	冯仁艳	女	30Y	取除骨折内固定装置		其他	洪建军	余洋	郑亦静	踝关节内固定装置去除术
867	C04综合病房	2023-05-20	2023-05-22	3369675	徐顺海	男	47Y	取除骨折内固定装置		其他	陈龙	应晓洲	应晓洲	跟骨内固定物取出术
868	C04综合病房	2023-05-20	2023-05-22	3369676	黎迎亚	男	28Y	取除骨折内固定装置		其他	陈龙	应晓洲	应晓洲	腓骨内固定装置去除术;胫骨内固定装置去除术
869	C04综合病房	2023-05-21	2023-05-22	3369810	陈立永	男	49Y	骨折内固定物植入感染	慢性乙型病毒性肝炎	治愈	余可和	余可和	王少华2	桡骨内固定装置去除术;皮肤和皮下坏死组织切除清创术
870	C04综合病房	2023-05-22	2023-05-24	3370666	吴敏敏	女	27Y	取除骨折内固定装置		其他	杨雷	胡炜	白炳力	骨盆内固定装置去除术
871	C04综合病房	2023-05-23	2023-05-24	3370722	陈可馨	女	5Y	取除骨折内固定装置		其他	杨雷	胡炜	白炳力	胫骨内固定装置去除术
872	C04综合病房	2023-05-23	2023-05-25	3370910	陈王伟	男	43Y	取除骨折内固定装置		其他	杨雷	胡炜	白炳力	髌骨内固定装置去除术
873	C04综合病房	2023-05-23	2023-05-25	3370912	冯亦启	男	63Y	取除骨折内固定装置	腰椎间盘突出;肝囊肿;前列腺结石	其他	翁益民	翁益民	项光恒	肱骨内固定装置去除术
874	C04综合病房	2023-05-24	2023-05-26	3371170	吕政	男	17Y	取除骨折内固定装置		其他	余可和	余可和	王少华2	跟骨内固定物取出术;皮肤瘢痕切除术
875	C04综合病房	2023-05-27	2023-05-29	3372217	邱兰芬	女	57Y	取除骨折内固定装置	后天性肾囊肿;肺部阴影;肾错构瘤	其他	陈龙	应晓洲	应晓洲	股骨内固定装置去除术
876	C04综合病房	2023-05-27	2023-05-29	3372292	王少珍	女	59Y	取除骨折内固定装置	后天性肾囊肿;脂肪肝	其他	陈龙	应晓洲	应晓洲	桡骨内固定装置去除术
877	C04综合病房	2023-05-18	2023-05-30	3373148	陈招翠	女	75Y	脓毒性休克	肾结石;下肢动脉粥样硬化;骨折治疗后恢复期;腔隙性脑梗死;急性坏疽性胆囊炎;急性弥漫性腹膜炎;麻痹性肠梗阻;胸腔积液;下肢静脉血栓形成;低钾血症	治愈	王飞海	周磊	潘传孟	胆囊切除术;腹腔冲洗检查
878	C04综合病房	2023-05-29	2023-05-31	3373454	陈菲菲	女	61Y	取除骨折内固定装置	肾结石;胆囊结石;脂肪肝	其他	杨雷	胡炜	白炳力	肱骨内固定装置去除术;肱骨植骨术
879	C04综合病房	2023-05-30	2023-06-01	3373692	周绍根	男	30Y	取除骨折内固定装置		其他	陈龙	应晓洲	应晓洲	锁骨内固定装置去除术
880	C04综合病房	2023-05-30	2023-06-01	3373693	孙爱华	女	39Y	取除骨折内固定装置		其他	陈龙	应晓洲	王特	胫骨内固定装置去除术
881	C04综合病房	2023-05-30	2023-06-01	3373869	黄菲菲	女	32Y	取除骨折内固定装置		其他	翁益民	翁益民	项光恒	踝关节内固定装置去除术
882	C04综合病房	2023-05-31	2023-06-02	3374009	吴彩凤	女	58Y	骨折内固定装置障碍	2型糖尿病;高血压	治愈	王振文	水小龙	徐宏威	髌骨内固定装置去除术
883	C04综合病房	2023-05-31	2023-06-02	3374010	徐承英	女	72Y	取除骨折内固定装置	高血压;2型糖尿病	其他	王振文	水小龙	徐宏威	踝关节内固定装置去除术
884	C04综合病房	2023-05-31	2023-06-03	3374481	刘贤安	男	53Y	取除骨折内固定装置		其他	王振文	水小龙	徐宏威	跟骨内固定物取出术
885	C04综合病房	2023-06-01	2023-06-03	3374482	金福开	男	42Y	取除骨折内固定装置	肾结石	其他	杨雷	胡炜	白炳力	掌骨内固定装置去除术
886	C04综合病房	2023-05-12	2023-06-04	3374666	陈春菊	女	68Y	腹壁切口疝	胆囊结石;慢性乙型病毒性肝炎;脂肪肝;肠粘连;特指手术后状态;后天性肾囊肿;子宫切除术后状态;骨折治疗后恢复期;肝内胆管结石	治愈	杨越涛	王奕庚	徐训政	腹腔镜下胆囊切除术;腹壁切口疝无张力修补术;肠粘连松解术
887	C04综合病房	2023-06-03	2023-06-04	3375007	黄笑芬	女	64Y	取除骨折内固定装置		其他	陈龙	王特	王特	腓骨内固定装置去除术;跟骨内固定物取出术
888	C04综合病房	2023-06-03	2023-06-05	3375262	周炬克	男	43Y	取除骨折内固定装置		其他	陈龙	王特	王特	髌骨内固定装置去除术
889	C04综合病房	2023-06-03	2023-06-05	3375345	张绍军	男	60Y	取除骨折内固定装置	脊髓灰质炎的后遗症	其他	杨雷	胡炜	白炳力	胫骨内固定装置去除术
890	C04综合病房	2023-06-04	2023-06-06	3376000	冯盛伟	男	33Y	取除骨折内固定装置	肾结石;脂肪肝	其他	余可和	余可和	王少华2	肩锁关节内固定物取出术
891	C04综合病房	2023-06-04	2023-06-06	3376004	朱仙忠	男	32Y	取除骨折内固定装置	后天性肾囊肿;脂肪肝	其他	赵友明	赵友明	方文来	锁骨内固定装置去除术
892	C04综合病房	2023-06-04	2023-06-06	3376041	林浩	男	50Y	取除骨折内固定装置		其他	余可和	余可和	王少华2	髌骨内固定装置去除术
893	C04综合病房	2023-06-05	2023-06-07	3376282	谷恩林	男	47Y	取除骨折内固定装置	脂肪肝	其他	王振文	水小龙	徐宏威	踝关节内固定装置去除术
894	C04综合病房	2023-05-22	2023-06-10	3377218	杨阿香	女	72Y	腹壁切口疝	脂肪肝;后天性肾囊肿;肾结石;高血压;支气管哮喘，非危重;腔隙性脑梗死;老年性心脏病;2型糖尿病;陈旧性肋骨骨折	治愈	杨越涛	王奕庚	徐训政	腹壁切口疝无张力修补术
895	C04综合病房	2023-06-10	2023-06-12	3377821	瞿维福	男	54Y	取除骨折内固定装置	肾结石;脂肪肝	其他	陈龙	陈龙	王特	桡骨内固定装置去除术
896	C04综合病房	2023-06-10	2023-06-12	3377823	叶玉花	女	60Y	取除骨折内固定装置	肾结石;膝关节病;肺结节病;肾钙化	其他	陈龙	陈龙	王特	锁骨内固定装置去除术
897	C04综合病房	2023-06-10	2023-06-12	3377825	林明特	男	19Y	取除骨折内固定装置	脂肪肝;肾结石	其他	陈龙	陈龙	王特	踝关节内固定装置去除术
898	C04综合病房	2023-06-11	2023-06-13	3378514	徐彩珠	女	55Y	取除骨折内固定装置		其他	杨雷	胡炜	白炳力	踝关节内固定装置去除术
899	C04综合病房	2023-06-13	2023-06-13	3378549	夏知萍	女	56Y	骨折治疗后恢复期	胆囊结石;高血压	其他	陈龙	王特	王特
900	C04综合病房	2023-06-13	2023-06-15	3379213	范美香	女	62Y	取除骨折内固定装置	高血压病;糖尿病	其他	陈龙	陈龙	王特	踝关节内固定装置去除术
901	C04综合病房	2023-06-13	2023-06-15	3379215	陈佳豪	男	19Y	取除骨折内固定装置		其他	陈龙	陈龙	王特	胫骨内固定装置去除术
902	C04综合病房	2023-06-13	2023-06-15	3379222	马培群	女	50Y	取除骨折内固定装置	脂肪肝	其他	陈龙	陈龙	王特	肩锁关节内固定物取出术
903	C04综合病房	2023-06-13	2023-06-15	3379239	曹光欣	男	44Y	取除骨折内固定装置	高血压病;脾大;脂肪肝	其他	陈龙	陈龙	王特	跗骨内固定装置去除术
904	C04综合病房	2023-06-15	2023-06-17	3379855	唐旺松	男	36Y	取除骨折内固定装置		其他	余可和	余可和	王少华2	胫骨内固定装置去除术
905	C04综合病房	2023-06-15	2023-06-17	3379875	陈兰娒	女	60Y	取除骨折内固定装置		其他	余可和	余可和	王少华2	胫骨内固定装置去除术
906	C04综合病房	2023-06-17	2023-06-19	3380773	项珠兰	女	55Y	取除骨折内固定装置	膝关节病	其他	陈龙	陈龙	王特	髌骨内固定装置去除术
907	C04综合病房	2023-06-17	2023-06-19	3380776	夏知萍	女	56Y	取除骨折内固定装置	高血压病	其他	陈龙	陈龙	王特	胫骨内固定装置去除术
908	C04综合病房	2023-06-17	2023-06-19	3380777	林永虎	男	56Y	骨折治疗后恢复期	肝炎后肝硬化;前列腺结石;前列腺增生;肝囊肿	其他	陈龙	王特	王特	踝关节内固定装置去除术
909	C04综合病房	2023-06-17	2023-06-19	3380954	朱小琴	女	65Y	取除骨折内固定装置	特指手术后状态	其他	陈龙	陈龙	王特	髌骨内固定装置去除术
910	C04综合病房	2023-06-17	2023-06-19	3381069	杨永花	女	66Y	取除骨折内固定装置	肾盂积水，其他的;脂肪肝	其他	杨雷	杨雷	白炳力	胫骨内固定装置去除术
911	C04综合病房	2023-06-06	2023-06-20	3381562	杨学开	男	79Y	脾损伤	锁骨骨折;胸椎骨折;前列腺增生;脂肪肝;胸腔积液;下肢静脉血栓形成;胸部浅表损伤;后天性肾囊肿;肾结石;肋骨多处骨折;下肢动脉粥样硬化;腹腔积血;肺挫伤	治愈	倪仲琳	黄和	姚志超
912	C04综合病房	2023-06-18	2023-06-20	3381569	季冬武	男	49Y	取除骨折内固定装置		其他	余可和	余可和	王少华2	趾骨内固定装置去除术
913	C04综合病房	2023-06-19	2023-06-21	3381924	董乐芬	女	25Y	取除骨折内固定装置	脂肪肝;胆囊息肉	其他	杨雷	杨雷	白炳力	踝关节内固定装置去除术
914	C04综合病房	2023-06-19	2023-06-21	3381927	段秀芝	女	73Y	取除骨折内固定装置		其他	杨雷	杨雷	白炳力	胫骨内固定装置去除术
915	C04综合病房	2023-06-20	2023-06-22	3382287	郦加凯	男	33Y	第一掌骨骨折	脂肪肝	好转	陈龙	陈龙	王特	掌骨骨折切开复位术;石膏绷带固定
916	C04综合病房	2023-06-20	2023-06-22	3382289	章秋月	女	55Y	取除骨折内固定装置	胆囊结石;脂肪肝	其他	杨雷	杨雷	白炳力	胫骨内固定装置去除术
917	C04综合病房	2023-06-20	2023-06-22	3382361	金赛青	女	58Y	取除骨折内固定装置	乙型肝炎小三阳;非风湿性二尖瓣关闭不全;高血压;肺大疱	其他	赵友明	方文来	方文来	胫骨内固定装置去除术
918	C04综合病房	2023-06-20	2023-06-22	3382363	张素菲	女	53Y	取除骨折内固定装置	主动脉（瓣）关闭不全	其他	赵友明	方文来	方文来	胫骨内固定装置去除术
919	C04综合病房	2023-06-22	2023-06-24	3382798	卢加琼	女	51Y	取除骨折内固定装置	肝囊肿;高血压	其他	王振文	水小龙	徐宏威	胫骨内固定装置去除术
920	C04综合病房	2023-06-22	2023-06-24	3382859	蔡珍珍	女	57Y	取除骨折内固定装置	后天性肾囊肿;脂肪肝;肾结石	其他	王振文	水小龙	徐宏威	胫骨内固定装置去除术
921	C04综合病房	2023-06-24	2023-06-25	3383603	丁朝敏	男	45Y	取除骨折内固定装置	肾结石;肝囊肿	其他	陈龙	陈龙	王特	桡骨内固定装置去除术
922	C04综合病房	2023-06-24	2023-06-26	3383837	王程	男	45Y	取除骨折内固定装置	后天性肾囊肿;肺大疱;肺结节	其他	洪建军	卢晓郎	卢晓郎	跟骨内固定物取出术;皮肤瘢痕切除术
923	C04综合病房	2023-06-24	2023-06-26	3383840	陈金兰	女	56Y	取除骨折内固定装置	肘关节僵硬;脂肪肝	其他	陈龙	陈龙	王特	桡骨内固定装置去除术
924	C04综合病房	2023-06-24	2023-06-26	3383842	范春英	女	54Y	取除骨折内固定装置	胆囊结石	其他	陈龙	陈龙	王特	桡骨内固定装置去除术;髌骨内固定装置去除术
925	C04综合病房	2023-06-24	2023-06-26	3383844	陈洪媛	女	68Y	取除骨折内固定装置	陈旧性腓骨骨折;心功能不全	其他	陈龙	陈龙	王特	股骨内固定装置去除术;踝关节内固定装置去除术
926	C04综合病房	2023-06-26	2023-06-26	3384187	陈彩花	女	73Y	骨质疏松伴有病理性骨折	陈旧性胸椎骨折	治愈	毛方敏	毛方敏	朱思品
927	C04综合病房	2023-05-30	2023-06-27	3384349	雷聪梅	女	52Y	小肠穿孔	肋骨多处骨折;创伤后伤口感染;股骨粗隆间骨折;骨盆骨折;腹膜后血肿;肠粘连;急性腹膜炎;手术后状态，其他特指的;多发性腰椎骨折;腹壁挫伤	治愈	倪仲琳	黄和	姚志超	小肠破裂修补术;股骨骨折切开复位螺钉内固定术;肠粘连松解术;骨盆骨折切开复位螺钉内固定术;腹腔穿刺引流术
928	C04综合病房	2023-06-16	2023-06-27	3384535	吴志军	男	43Y	创伤性脾动脉破裂	腹腔积血;胸腔积液;颅骨多发性骨折;创伤性肾血肿	治愈	倪仲琳	黄和	姚志超	小肠排列术;开腹探查术;全脾切除术;腹腔穿刺引流术
929	C04综合病房	2023-06-26	2023-06-27	3384537	周志兄	男	66Y	取除骨折内固定装置	前列腺结石;前列腺囊肿;糖尿病	其他	杨雷	杨雷	白炳力	跗骨内固定装置去除术
930	C04综合病房	2023-06-26	2023-06-28	3384751	赵玉花	女	45Y	取除骨折内固定装置		其他	赵友明	方文来	方文来	桡骨内固定装置去除术
931	C04综合病房	2023-06-26	2023-06-28	3384755	吕子聪	男	55Y	取除骨折内固定装置	主动脉钙化;肺钙化;肾结石;高血压;冠状动脉粥样硬化（狭窄）	其他	赵友明	方文来	方文来	胫骨内固定装置去除术
932	C04综合病房	2023-06-18	2023-06-28	3384770	傅叶飞	女	27Y	腹腔积血	卵巢、输卵管和阔韧带的非炎性疾患;致密性骨炎;肺挫伤;骶骨骨折;腰椎骨折;胸椎骨折;气胸	好转	倪仲琳	黄和	姚志超
933	C04综合病房	2023-06-27	2023-06-29	3385443	黄松进	男	46Y	取除骨折内固定装置		其他	余可和	余可和	王少华2	肩锁关节内固定物取出术
934	C04综合病房	2023-07-01	2023-07-02	3386573	陈开道	男	37Y	取除骨折内固定装置	手术后状态，其他特指的;高血压	其他	陈龙	陈龙	王特	肩锁关节内固定物取出术
935	C04综合病房	2023-07-01	2023-07-03	3386763	侯爱明	男	47Y	取除骨折内固定装置	脂肪肝	其他	杨雷	周一飞	白炳力	肱骨内固定装置去除术;尺骨内固定装置去除术
936	C04综合病房	2023-07-01	2023-07-03	3386769	孙洪榜	男	51Y	取除骨折内固定装置		其他	陈龙	陈龙	王特	跟骨内固定物取出术
937	C04综合病房	2023-07-01	2023-07-03	3386772	陈佳炜	男	14Y	取除骨折内固定装置	脂肪肝	其他	陈龙	陈龙	王特	骨盆内固定装置去除术
938	C04综合病房	2023-07-04	2023-07-04	3387428	兰金生	男	51Y	取除骨折内固定装置		其他	陈龙	陈龙	王特	踝关节内固定装置去除术
939	C04综合病房	2023-07-03	2023-07-05	3387856	肖金梅	女	45Y	取除骨折内固定装置		其他	杨雷	周一飞	白炳力	胫骨内固定装置去除术
940	C04综合病房	2023-07-03	2023-07-05	3387858	刘国华	男	47Y	取除骨折内固定装置	脂肪肝	其他	杨雷	周一飞	白炳力	跟骨内固定物取出术
941	C04综合病房	2023-07-02	2023-07-05	3388008	贾进华	男	66Y	脊柱骨折	脊柱后凸;特发性（原发性）高血压;脂肪肝;后天性肾囊肿;前列腺增生;前列腺结石;肺间质纤维化;心功能不全	治愈	倪文飞	王胜	王贤亮	胸椎骨折球囊扩张成形术;腰椎骨折球囊扩张成形术
942	C04综合病房	2023-07-04	2023-07-06	3388255	叶学力	男	14Y	取除骨折内固定装置		其他	赵友明	方文来	方文来	肱骨内固定装置去除术
943	C04综合病房	2023-07-04	2023-07-06	3388257	徐香华	女	69Y	取除骨折内固定装置	高血压;下肢动脉粥样硬化;主动脉硬化	其他	赵友明	方文来	方文来	桡骨内固定装置去除术
944	C04综合病房	2023-07-04	2023-07-06	3388274	吴金飞	女	51Y	腱鞘囊肿	桡骨远端骨折;肺间质纤维化;肺部结节	好转	赵友明	方文来	方文来	腱鞘囊肿切除术
945	C04综合病房	2023-07-03	2023-07-06	3388585	李娴	女	15Y	取除骨折内固定装置		其他	杨雷	周一飞	白炳力	踝关节内固定装置去除术
946	C04综合病房	2023-07-05	2023-07-08	3389272	蔡洪波	男	25Y	取除骨折内固定装置	前列腺结石;瘢痕疙瘩;脂肪肝	其他	余可和	余可和	王少华2	踝关节内固定装置去除术;皮肤瘢痕切除术
947	C04综合病房	2023-07-05	2023-07-08	3389282	邹广凡	女	61Y	取除骨折内固定装置	肘关节僵硬;高血压;瘢痕疙瘩;甲状腺术后	其他	余可和	余可和	王少华2	肘关节松解术;皮肤瘢痕切除术;尺骨内固定装置去除术
948	C04综合病房	2023-07-09	2023-07-09	3389884	张锦飞	女	63Y	取除骨折内固定装置	后天性踇外翻	其他	余可和	余可和	王少华2	趾骨内固定装置去除术
949	C04综合病房	2023-07-08	2023-07-10	3389956	倪金莲	女	53Y	取除骨折内固定装置	应力性骨折;后天性肾囊肿;肝囊肿;脂肪肝	其他	陈龙	陈龙	王特	胫骨内固定装置去除术
950	C04综合病房	2023-07-08	2023-07-10	3389966	林翔	男	16Y	取除骨折内固定装置		其他	陈龙	陈龙	王特	桡骨内固定装置去除术
951	C04综合病房	2023-07-08	2023-07-10	3389975	陈文武	男	44Y	取除骨折内固定装置	陈旧性肋骨骨折;肾结石	其他	陈龙	陈龙	王特	桡骨内固定装置去除术
952	C04综合病房	2023-07-08	2023-07-10	3390042	虞瑞珺	女	41Y	取除骨折内固定装置		其他	陈华	孙辽军	蔡乐益	踝关节内固定装置去除术
953	C04综合病房	2023-07-10	2023-07-11	3390749	吴樟棋	男	67Y	取除骨折内固定装置	单侧膝关节骨性关节病;脂肪肝;前列腺结石	其他	王鉴顺	王鉴顺	何自力	胫骨内固定装置去除术
954	C04综合病房	2023-07-10	2023-07-12	3390992	方自豪	男	13Y	取除骨折内固定装置		其他	王振文	水小龙	徐宏威	皮肤瘢痕切除术;尺骨内固定装置去除术
955	C04综合病房	2023-07-10	2023-07-12	3391161	郑英锋	男	34Y	取除骨折内固定装置	后天性肾囊肿	其他	杨雷	周一飞	白炳力	跖骨内固定装置去除术
956	C04综合病房	2023-07-10	2023-07-12	3391165	简冬香	女	51Y	取除骨折内固定装置		其他	杨雷	周一飞	白炳力	股骨内固定装置去除术
957	C04综合病房	2023-07-11	2023-07-13	3391602	叶洋睿	男	14Y	取除骨折内固定装置	肾发育不全;副脾	其他	陈龙	陈龙	王特	胫骨内固定装置去除术
958	C04综合病房	2023-07-11	2023-07-13	3391617	徐国海	男	51Y	取除骨折内固定装置	脂肪肝	其他	陈龙	陈龙	王特	桡骨内固定装置去除术
959	C04综合病房	2023-07-11	2023-07-13	3391624	胡蓉	女	59Y	取除骨折内固定装置	肝囊肿;心功能不全;后天性肾囊肿	其他	陈龙	陈龙	王特	股骨内固定装置去除术
960	C04综合病房	2023-07-12	2023-07-14	3391985	朱进林	男	36Y	取除骨折内固定装置		其他	洪建军	郑亦静	郑亦静	皮肤瘢痕切除术;肩锁关节内固定物取出术
961	C04综合病房	2023-07-13	2023-07-15	3392511	倪献芬	女	50Y	取除骨折内固定装置	脂肪肝	其他	陈龙	陈龙	王特	踝关节内固定装置去除术
962	C04综合病房	2023-07-15	2023-07-17	3393254	李克鸿	男	13Y	取除骨折内固定装置	脂肪肝	其他	陈龙	陈龙	王特	踝关节内固定装置去除术
963	C04综合病房	2023-07-15	2023-07-17	3393268	孙芳	女	29Y	取除骨折内固定装置	肾结石	其他	陈龙	陈龙	王特	肩胛骨内固定装置去除术
964	C04综合病房	2023-07-15	2023-07-17	3393269	杨朋	男	26Y	取除骨折内固定装置	脂肪肝;后天性肾囊肿	其他	陈龙	陈龙	王特	胫骨内固定装置去除术
965	C04综合病房	2023-07-07	2023-07-17	3393299	叶金莲	女	65Y	双踝骨折	腹腔积液;胸腔积液;肋骨骨折;慢性乙型病毒性肝炎;耻骨骨折;骶骨骨折	治愈	吴伟军	邓应彬	邓应彬	踝关节修补术;关节软骨修复术;踝关节骨折切开复位钢板内固定术
966	C04综合病房	2023-07-04	2023-07-18	3393773	潘鸣雷	男	37Y	肝挫伤	多处开放性伤口;脾损伤;肾挫伤;创伤性肾血肿;肾上腺血肿;腹腔积液;肋骨多处骨折;腰椎骨折;胸腔积液;肌腱和肌肉损伤;支气管哮喘	好转	倪仲琳	黄和	姚志超	超声引导下胸腔穿刺术
967	C04综合病房	2023-07-16	2023-07-18	3394043	林招平	男	55Y	取除骨折内固定装置	肺部结节;脂肪肝;胆囊息肉	其他	余可和	余可和	王少华2	髌骨内固定装置去除术
968	C04综合病房	2023-07-17	2023-07-19	3394418	向真	男	62Y	取除骨折内固定装置	胆囊息肉;后天性肾囊肿;肾结石;前列腺结石	其他	杨雷	周一飞	白炳力	膝关节内固定物取出术
969	C04综合病房	2023-07-18	2023-07-19	3394570	徐梓钧	男	19Y	取除骨折内固定装置		其他	洪建军	卢晓郎	卢晓郎	皮肤瘢痕切除术;跗骨内固定装置去除术
970	C04综合病房	2023-07-18	2023-07-19	3394610	朱玉散	女	37Y	取除骨折内固定装置		其他	洪建军	卢晓郎	卢晓郎	踝关节内固定装置去除术;皮肤瘢痕切除术
971	C04综合病房	2023-07-19	2023-07-21	3395129	翁林海	男	45Y	取除骨折内固定装置	肾结石	其他	余可和	余可和	王少华2	皮肤瘢痕切除术;胫骨内固定装置去除术
972	C04综合病房	2023-06-27	2023-07-21	3395204	王爱玉	女	61Y	急性胰腺炎	特发性（原发性）高血压;胆囊结石伴胆囊炎;胆总管扩张;脂肪肝;后天性肾囊肿;手术后状态，其他特指的;腰椎侧弯;腔隙性脑梗死;取除骨折内固定装置;胸腔积液	治愈	杨越涛	王奕庚	徐训政	腹腔镜下胆囊切除术
973	C04综合病房	2023-07-12	2023-07-22	3395753	陈飞凤	女	86Y	胆囊结石伴胆囊炎	胆总管扩张;特发性（原发性）高血压;肝囊肿;后天性肾囊肿;肾结石;骨折治疗后恢复期;贫血	好转	倪仲琳	黄和	姚志超
974	C04综合病房	2023-07-22	2023-07-24	3396404	赵慧敏	女	12Y	取除骨折内固定装置		其他	陈华	孙辽军	蔡乐益	皮肤瘢痕切除术;肱骨内固定装置去除术
975	C04综合病房	2023-07-22	2023-07-24	3396406	胡仲达	男	42Y	取除骨折内固定装置	脂肪肝;胆囊结石	其他	陈龙	陈龙	王特	桡骨内固定装置去除术
976	C04综合病房	2023-07-22	2023-07-24	3396410	刘新豹	男	50Y	取除骨折内固定装置	脂肪肝;胆囊胆固醇沉着症;后天性肾囊肿	其他	陈龙	陈龙	王特	掌骨内固定装置去除术
977	C04综合病房	2023-07-22	2023-07-24	3396479	梁朋旺	男	30Y	取除骨折内固定装置		其他	陈龙	陈龙	王特	锁骨内固定装置去除术
978	C04综合病房	2023-07-24	2023-07-25	3397073	钱曼菲	女	73Y	取除骨折内固定装置	高血压;帕金森病;2型糖尿病	其他	陈华	孙辽军	蔡乐益	踝关节内固定装置去除术
979	C04综合病房	2023-07-17	2023-07-25	3397188	徐德钻	男	64Y	胆总管结石伴急性胆管炎	急性胆囊炎;脾大;男性盆腔炎;掌骨骨折	治愈	吴伟军	吴伟军	邓应彬	内镜逆行胰胆管造影[ERCP]
980	C04综合病房	2023-07-24	2023-07-26	3397485	王恒库	男	37Y	取除骨折内固定装置		其他	杨雷	周一飞	白炳力	髌骨内固定装置去除术
981	C04综合病房	2023-07-25	2023-07-26	3397720	何小玛	男	10Y	取除骨折内固定装置		其他	陈龙	陈龙	王特	锁骨内固定装置去除术
982	C04综合病房	2023-07-25	2023-07-27	3398017	官正怀	男	44Y	取除骨折内固定装置	脂肪肝;局部肿胀、肿物和肿块	其他	陈龙	陈龙	王特	胫骨内固定装置去除术
983	C04综合病房	2023-07-25	2023-07-27	3398023	徐媚媚	女	57Y	取除骨折内固定装置	特发性（原发性）高血压;脂肪肝;胆囊息肉	其他	陈龙	陈龙	王特	腓骨内固定装置去除术;踝关节内固定装置去除术
984	C04综合病房	2023-07-25	2023-07-27	3398093	陈芝鎯	男	16Y	取除骨折内固定装置		其他	陈龙	陈龙	王特	骨盆内固定装置去除术
985	C04综合病房	2023-07-26	2023-07-28	3398329	林依晨	女	7Y	取除骨折内固定装置		其他	余可和	余可和	王少华2	皮肤瘢痕切除术;尺骨内固定装置去除术
986	C04综合病房	2023-07-17	2023-07-30	3399120	徐谷清	男	55Y	脾破裂	多处开放性伤口;腹腔积血;肺挫伤;创伤性湿肺;胸腔积液;肋骨多处骨折;肾结石	治愈	吴伟军	邓应彬	张超2	开腹探查术;全脾切除术;腹腔冲洗检查
987	C04综合病房	2023-07-02	2023-07-30	3399295	陈云理	男	50Y	肠系膜损伤	肋骨多处骨折;耻骨骨折;髂骨骨折;多发性腰椎骨折	治愈	王飞海	周磊	潘传孟	开腹探查术;腹腔冲洗检查;肠系膜修补术
988	C04综合病房	2023-07-30	2023-08-01	3400115	毛芳缘	男	58Y	取除骨折内固定装置	肺的其他疾患;脂肪肝;后天性肾囊肿	其他	余可和	余可和	王少华2	腓骨内固定装置去除术
989	C04综合病房	2023-07-31	2023-08-01	3400303	林玲玲	女	35Y	取除骨折内固定装置	肝钙化灶;肝囊肿	其他	王振文	水小龙	徐宏威	胫骨内固定装置去除术
990	C04综合病房	2023-07-31	2023-08-02	3400490	郑小萍	女	56Y	取除骨折内固定装置	脂肪肝	其他	王振文	水小龙	徐宏威	髌骨内固定装置去除术
991	C04综合病房	2023-07-31	2023-08-02	3400554	章君妹	女	38Y	骨折术后恢复期		其他	陈华	孙辽军	蔡乐益	髌骨内固定装置去除术
992	C04综合病房	2023-07-09	2023-08-02	3400616	余喜云	女	48Y	创伤性肠破裂	贫血;胸骨骨折;急性腹膜炎;盆腔积液	治愈	杨越涛	王奕庚	徐训政	横结肠裂伤修补术;结肠造口术;小肠破裂修补术;结肠造口还纳术
993	C04综合病房	2023-08-01	2023-08-03	3401123	江怡静	女	12Y	取除骨折内固定装置		其他	赵友明	方文来	方文来	踝关节内固定装置去除术
994	C04综合病房	2023-06-28	2023-08-05	3402038	魏利民	男	44Y	肘关节脱位	股骨干骨折;髌骨骨折;股骨颈骨折;颅骨骨折;消化道穿孔;手术后状态，其他特指的;胸腔积液;肝脂肪瘤;椎间盘膨隆;尺骨冠突骨折;桡骨头骨折;尺侧副韧带断裂	治愈	吴伟军	邓应彬	张超2	牙龈成形术;髌骨骨折切开复位张力带钢丝内固定术;尺骨骨折切开复位螺钉内固定术;下颌骨骨折切开复位内固定术;股骨骨折切开复位钢板内固定术;肘关节脱位切开复位内固定术;石膏绷带固定;副韧带的其他修补术;股骨骨折切开复位螺钉内固定术
995	C04综合病房	2023-07-16	2023-08-05	3402047	林三翠	女	88Y	股骨粗隆间骨折	耻骨骨折;急性肠梗塞;特发性(原发性)高血压	治愈	王飞海	周磊	潘传孟	股骨骨折闭合复位髓内针内固定术
996	C04综合病房	2023-08-05	2023-08-05	3402143	金清微	女	35Y	取除骨折内固定装置	胆囊结石;未进行操作	其他	陈龙	陈龙	王特
997	C04综合病房	2023-08-05	2023-08-07	3402730	吴爱华	女	63Y	取除骨折内固定装置	脂肪肝;肝囊肿;后天性肾囊肿;胆囊胆固醇沉着症;肝血管瘤	其他	陈龙	陈龙	王特	腓骨内固定装置去除术
998	C04综合病房	2023-08-08	2023-08-10	3404347	林炳化	男	42Y	取除骨折内固定装置	肾结石	其他	陈龙	陈龙	王特	桡骨内固定装置去除术
999	C04综合病房	2023-08-08	2023-08-10	3404356	刘婷婷	女	28Y	取除骨折内固定装置	肾结石	其他	陈龙	陈龙	王特	胫骨内固定装置去除术
1000	C04综合病房	2023-08-08	2023-08-10	3404357	陈青华	男	52Y	取除骨折内固定装置	脂肪肝;胆囊结石;肾结石;甲状腺结节	其他	陈龙	陈龙	王特	皮肤瘢痕切除术;髌骨内固定装置去除术
1001	C04综合病房	2023-08-12	2023-08-14	3405956	金清微	女	35Y	取除骨折内固定装置	胆囊结石	其他	陈龙	陈龙	王特	皮肤瘢痕切除术;髌骨内固定装置去除术
1002	C04综合病房	2023-08-12	2023-08-14	3406023	刘益峰	男	18Y	取除骨折内固定装置		其他	陈龙	陈龙	王特	股骨内固定装置去除术;胫骨内固定装置去除术
1003	C04综合病房	2023-08-12	2023-08-14	3406264	陈海平	女	43Y	取除骨折内固定装置	胆囊息肉;甲状腺肿	其他	陈龙	陈龙	王特	肱骨内固定装置去除术
1004	C04综合病房	2023-08-14	2023-08-16	3406816	章彬彬	男	30Y	取除骨折内固定装置	脂肪肝;肾结石	其他	杨雷	周一飞	白炳力	桡骨内固定装置去除术
1005	C04综合病房	2023-08-14	2023-08-16	3407018	林翰	男	11Y	取除骨折内固定装置		其他	王振文	水小龙	徐宏威	踝关节内固定装置去除术
1006	C04综合病房	2023-08-04	2023-08-20	3408536	成善俊	男	47Y	肝挫伤	三根肋骨骨折不伴第一肋骨骨折;胸腔积液;腹腔积液;胆囊结石;脂肪肝;后天性肾囊肿;肝囊肿	好转	王飞海	周磊	潘传孟
1007	C04综合病房	2023-08-16	2023-08-20	3408837	王碎葱	女	89Y	肋骨多处骨折	腹腔积液;胸腔积液;盆腔肿物;下颌骨骨折;肾积水伴肾结石;鼻骨骨折;骨折治疗后恢复期;多发性脑梗死	好转	倪仲琳	黄和	姚志超
1008	C04综合病房	2023-08-19	2023-08-21	3408976	杨崇尚	男	36Y	取除骨折内固定装置	胆囊息肉	其他	陈龙	陈龙	王特	踝关节内固定装置去除术
1009	C04综合病房	2023-08-19	2023-08-21	3408977	丁力芝	男	29Y	取除骨折内固定装置	肾结石;后天性肾囊肿	其他	陈龙	陈龙	王特	踝关节内固定装置去除术
1010	C04综合病房	2023-08-14	2023-08-21	3409266	叶妹蕊	女	64Y	创伤性脾血肿	肩胛骨骨折;肺挫伤;胸腔积液;后天性肾囊肿	好转	杨越涛	王奕庚	徐训政
1011	C04综合病房	2023-08-21	2023-08-21	3409394	廖云钗	女	75Y	骨质疏松伴有病理性骨折	腰椎退行性病变;胸椎退行性病变;椎间盘移位，其他特指的;特发性(原发性)高血压;腰椎骨折	好转	倪文飞	王胜	王贤亮
1012	C04综合病房	2023-08-21	2023-08-23	3410034	汤涛	男	18Y	取除骨折内固定装置		其他	杨雷	周一飞	白炳力	踝关节内固定装置去除术
1013	C04综合病房	2023-08-21	2023-08-23	3410069	潘英	女	53Y	取除骨折内固定装置		其他	杨雷	周一飞	白炳力	尺骨内固定装置去除术
1014	C04综合病房	2023-08-23	2023-08-24	3410677	高铎凯	男	6Y	鼻骨骨折	腺样体肥大;鼾症	治愈	陈波蓓	凡启军	李东	内镜下鼻骨骨折切开复位术;内镜下腺样体切除术
1015	C04综合病房	2023-07-19	2023-08-27	3411714	徐培川	男	42Y	腹部开放性损伤伴腹内器官损伤	腹腔积血;失血性休克;弥漫性腹膜炎;创伤后伤口感染;肋骨骨折;皮肤裂伤;腹部肌肉损伤;开放性结肠破裂;创伤性胃破裂;创伤性肠系膜静脉破裂	治愈	吴伟军	邓应彬	张超2	皮肤和皮下坏死组织切除清创术;腹腔穿刺引流术;胃破裂修补术;结肠部分切除术;开腹探查术;肋骨骨折闭合复位内固定术
1016	C04综合病房	2023-08-26	2023-08-28	3412272	王若依	女	7Y	取除骨折内固定装置		其他	陈龙	陈龙	王特	胫骨内固定装置去除术
1017	C04综合病房	2023-08-26	2023-08-28	3412276	陈继存	男	44Y	取除骨折内固定装置	脂肪肝;胆囊息肉	其他	陈龙	陈龙	王特	胫骨内固定装置去除术
1018	C04综合病房	2023-08-26	2023-08-28	3412389	陈俏丽	女	59Y	取除骨折内固定装置	肩部脂肪瘤;甲状腺功能减退症，其他特指的;肝囊肿	其他	陈龙	陈龙	王特	皮下组织病损切除术;肱骨内固定装置去除术
1019	C04综合病房	2023-08-30	2023-08-31	3413774	翁安琪	女	15Y	取除骨折内固定装置		其他	余可和	余可和	王少华2	皮肤瘢痕切除术;踝关节内固定装置去除术
1020	C04综合病房	2023-08-28	2023-09-02	3414397	蔡爱娥	女	67Y	急性化脓性阑尾炎	特发性(原发性)高血压;肾结石;肩关节僵硬;骨折治疗后恢复期;锁骨骨折;肋骨多处骨折;胸椎压缩性骨折;开放性脑挫伤;额骨骨折;眶骨骨折;颈椎间盘突出;2型糖尿病	治愈	王飞海	周磊	潘传孟	腹腔镜下阑尾切除术
1021	C04综合病房	2023-09-02	2023-09-02	3414525	张艳	女	16Y	取除骨折内固定装置	由于其他原因而未进行操作	其他	陈龙	应晓洲	应晓洲
1022	C04综合病房	2023-09-02	2023-09-04	3415219	缪美珠	女	58Y	取除骨折内固定装置	肾结石;胆囊息肉	其他	陈龙	应晓洲	应晓洲	肩锁关节内固定物取出术
1023	C04综合病房	2023-09-03	2023-09-05	3415771	卢昌宝	男	53Y	取除骨折内固定装置		其他	洪建军	余可和	王少华2	皮肤瘢痕切除术;跖骨内固定装置去除术
1024	C04综合病房	2023-09-04	2023-09-05	3415838	陈德权	男	62Y	取除骨折内固定装置	趾伸肌腱断裂;脂肪肝;前列腺增生;下肢动脉粥样硬化;肺结节病	其他	黄俊武	余贤斌	郑文浩	趾肌腱缝合术;跖骨内固定装置去除术
1025	C04综合病房	2023-09-04	2023-09-05	3415840	柯善成	男	50Y	取除骨折内固定装置	脂肪肝;肝囊肿;胆囊息肉;前列腺结石	其他	黄俊武	余贤斌	郑文浩	跗骨内固定装置去除术;跖骨内固定装置去除术
1026	C04综合病房	2023-09-02	2023-09-05	3415843	李庆送	男	63Y	取除骨折内固定装置	后天性肾囊肿;骨折术后恢复期	其他	杨雷	周一飞	白炳力	胫骨内固定装置去除术
1027	C04综合病房	2023-09-04	2023-09-05	3415844	刘锋	男	34Y	取除骨折内固定装置	脾大;肾结石	其他	黄俊武	余贤斌	郑文浩	皮肤瘢痕切除术;股骨内固定装置去除术
1028	C04综合病房	2023-09-05	2023-09-07	3416438	张艳	女	16Y	取除骨折内固定装置		其他	陈龙	应晓洲	应晓洲	骨盆内固定装置去除术
1029	C04综合病房	2023-09-06	2023-09-08	3416810	曾春英	女	57Y	取除骨折内固定装置	脂肪肝	其他	王振文	水小龙	徐宏威	尺骨内固定装置去除术
1030	C04综合病房	2023-09-06	2023-09-09	3417209	李陈凤	女	64Y	取除骨折内固定装置	特发性(原发性)高血压;糖尿病	其他	王振文	水小龙	徐宏威	桡骨内固定装置去除术;尺骨内固定装置去除术;肱骨内固定装置去除术
1031	C04综合病房	2023-09-07	2023-09-09	3417216	朱新德	男	48Y	取除骨折内固定装置	特发性(原发性)高血压;颈椎病;心功能不全;肝大;前列腺结石	其他	王振文	水小龙	徐宏威	跟骨内固定物取出术
1032	C04综合病房	2023-09-09	2023-09-10	3417608	袁宏全	男	37Y	取除骨折内固定装置	前列腺结石	其他	洪建军	卢晓郎	219049	跗骨内固定装置去除术
1033	C04综合病房	2023-09-09	2023-09-10	3417740	邱建剑	男	37Y	取除骨折内固定装置	脂肪肝;下肢静脉曲张	其他	洪建军	卢晓郎	219049	皮肤瘢痕切除术;跖骨内固定装置去除术
1034	C04综合病房	2023-09-09	2023-09-11	3418138	陈建新	男	63Y	取除骨折内固定装置	高血压	其他	陈龙	应晓洲	应晓洲	肱骨内固定装置去除术
1035	C04综合病房	2023-09-09	2023-09-11	3418145	卢年孝	男	56Y	取除骨折内固定装置	后天性肾囊肿;肾结石;脂肪肝	其他	陈龙	应晓洲	应晓洲	踝关节内固定装置去除术
1036	C04综合病房	2023-09-09	2023-09-11	3418166	林子钦	男	29Y	取除骨折内固定装置	乙型病毒性肝炎;胆囊结石	其他	陈龙	应晓洲	应晓洲	踝关节内固定装置去除术
1037	C04综合病房	2023-09-10	2023-09-11	3418296	戴成友	男	72Y	单侧腹股沟斜疝	手术后颅骨缺失;骨折术后恢复期	治愈	杨越涛	王奕庚	徐训政	腹腔镜下单侧腹股沟疝修补术
1038	C04综合病房	2023-08-29	2023-09-11	3418306	徐登良	男	56Y	急性坏疽性阑尾炎伴穿孔伴局限性腹膜炎	下肢静脉肌间血栓形成;特发性(原发性)高血压;男性盆腔炎;后天性肾囊肿;骨折不连接\[假关节\];手术后状态，其他特指的;下肢动脉粥样硬化	治愈	倪仲琳	黄和	姚志超	腹腔穿刺引流术;腹腔脓肿切开引流术;阑尾切除术
1039	C04综合病房	2023-09-09	2023-09-11	3418309	张于忠	男	59Y	取除骨折内固定装置		其他	陈龙	应晓洲	应晓洲	胫骨内固定装置去除术
1040	C04综合病房	2023-09-10	2023-09-12	3418676	张云	女	53Y	取除骨折内固定装置		其他	余可和	余可和	胡炜	桡骨内固定装置去除术
1041	C04综合病房	2023-09-10	2023-09-12	3418849	李正西	男	64Y	取除骨折内固定装置	骨折术后恢复期;骨筋膜室综合征	其他	余可和	余可和	胡炜	骨盆内固定装置去除术
1042	C04综合病房	2023-09-11	2023-09-12	3418864	孟勇丽	女	29Y	鼻骨骨折		治愈	陈波蓓	凡启军	潘豪来	鼻骨折闭合性复位术
1043	C04综合病房	2023-09-11	2023-09-13	3419124	郑兴培	男	37Y	取除骨折内固定装置	脂肪肝	其他	杨雷	周一飞	白炳力	肱骨内固定装置去除术
1044	C04综合病房	2023-09-12	2023-09-13	3419289	易昌毅	男	6Y	取除骨折内固定装置		其他	杨雷	周一飞	白炳力	肱骨内固定装置去除术
1045	C04综合病房	2023-09-16	2023-09-18	3420713	李瑞华	男	58Y	取除骨折内固定装置	肝囊肿;肾结石	其他	陈龙	应晓洲	应晓洲	踝关节内固定装置去除术
1046	C04综合病房	2023-09-16	2023-09-18	3420717	麻兴国	男	57Y	取除骨折内固定装置	脂肪肝	其他	陈华	孙辽军	蔡乐益	胫骨内固定装置去除术
1047	C04综合病房	2023-09-16	2023-09-18	3420813	文有芬	女	45Y	取除骨折内固定装置		其他	陈龙	应晓洲	应晓洲	尺骨内固定装置去除术
1048	C04综合病房	2023-09-16	2023-09-18	3420985	董耀淼	男	30Y	取除骨折内固定装置	肝回声不均	其他	周一飞	周一飞	白炳力	腓骨内固定装置去除术
1049	C04综合病房	2023-09-16	2023-09-18	3420986	黄聪森	男	36Y	取除骨折内固定装置		其他	陈龙	陈龙	应晓洲	胫骨内固定装置去除术
1050	C04综合病房	2023-09-19	2023-09-21	3422179	吴影雪	女	58Y	取除骨折内固定装置	肺的其他疾患;肺钙化;脂肪肝	其他	余可和	胡炜	胡炜	皮肤瘢痕切除术;肱骨内固定装置去除术
1051	C04综合病房	2023-09-19	2023-09-21	3422181	黄信用	男	57Y	取除骨折内固定装置	脂肪肝	其他	余可和	余可和	胡炜	胫骨内固定装置去除术
1052	C04综合病房	2023-09-19	2023-09-21	3422214	吴爱莲	女	61Y	取除骨折内固定装置	肝囊肿;高血压	其他	余可和	胡炜	胡炜	踝关节内固定装置去除术
1053	C04综合病房	2023-09-20	2023-09-21	3422387	潘虎	男	42Y	取除骨折内固定装置	脂肪肝;后天性肾囊肿;胆囊息肉	其他	王振文	水小龙	徐宏威	髌骨内固定装置去除术
1054	C04综合病房	2023-09-16	2023-09-21	3422411	杨谭友	男	46Y	脾损伤	腹腔积液;胆囊息肉;开放性胸部损伤;肋骨多处骨折;肺的其他疾患	好转	王飞海	周磊	张超2
1055	C04综合病房	2023-09-12	2023-09-22	3422574	吴陆荣	男	67Y	脓毒血症	腹膜炎;胆囊结石;肾功能不全;十二指肠憩室;慢性阻塞性肺病;肾结石;全身性硬皮病;手术后状态，其他特指的;骨折治疗后恢复期	治愈	吴伟军	吴伟军	潘达2
1056	C04综合病房	2023-09-20	2023-09-23	3422762	吴聪莲	女	54Y	取除骨折内固定装置	特发性(原发性)高血压;主动脉瓣关闭不全;二尖瓣反流;心功能不全	其他	王振文	余洋	徐宏威	肱骨内固定装置去除术
1057	C04综合病房	2023-09-22	2023-09-24	3423494	金邦笔	男	46Y	取除骨折内固定装置		其他	陈龙	应晓洲	应晓洲	胫骨内固定装置去除术
1058	C04综合病房	2023-09-23	2023-09-25	3423669	徐乐章	男	69Y	取除骨折内固定装置	后天性肾囊肿;高血压;2型糖尿病;肾结石	其他	杨雷	杨雷	白炳力	胫骨内固定装置去除术
1059	C04综合病房	2023-09-23	2023-09-25	3423672	胡正彩	女	53Y	取除骨折内固定装置	脂肪肝	其他	杨雷	周一飞	白炳力	踝关节内固定装置去除术
1060	C04综合病房	2023-09-10	2023-09-25	3423958	许萍萍	女	78Y	肠坏死	骨折治疗后恢复期;肺诊断性影像异常;脓毒性休克;腹腔积液;腹膜炎;胸腔积液	好转	倪仲琳	黄和	姚志超	腹腔冲洗检查;小肠其他部分切除术;小肠小肠吻合术
1061	C04综合病房	2023-09-25	2023-09-26	3424248	邹程翔	男	15Y	鼻骨骨折	鼻开放性伤口	治愈	高金建	凡启军	潘豪来	鼻骨折闭合性复位术
1062	C04综合病房	2023-09-25	2023-09-26	3424251	潘鹏程	男	8Y	鼻骨骨折		治愈	高金建	凡启军	219067	鼻骨折闭合性复位术
1063	C04综合病房	2023-09-25	2023-09-26	3424256	杨娴琦	女	14Y	鼻骨骨折	1型糖尿病	好转	陈波蓓	凡启军	潘豪来	鼻骨折闭合性复位术
1064	C04综合病房	2023-09-24	2023-09-26	3424396	黄绍炀	男	11Y	取除骨折内固定装置		其他	王振文	水小龙	徐宏威	胫骨内固定装置去除术
1065	C04综合病房	2023-09-25	2023-09-26	3424398	程四新	女	52Y	取除骨折内固定装置	下肢动脉粥样硬化	其他	周一飞	周一飞	白炳力	肩锁关节内固定物取出术
1066	C04综合病房	2023-09-25	2023-09-27	3424695	王贤博	男	33Y	取除骨折内固定装置		其他	陈华	孙辽军	蔡乐益	胫骨内固定装置去除术
1067	C04综合病房	2023-09-22	2023-10-01	3426813	杜亦雪	女	53Y	创伤性脾破裂	肋骨骨折	治愈	倪仲琳	黄和	姚志超	腹腔冲洗检查;全脾切除术
1068	C04综合病房	2023-09-30	2023-10-01	3426942	李家华	男	48Y	取除骨折内固定装置	脂肪肝;胆囊结石	其他	洪建军	卢晓郎	219049	皮肤瘢痕切除术;跖骨内固定装置去除术
1069	C04综合病房	2023-09-30	2023-10-01	3426946	朱世泽	男	43Y	取除骨折内固定装置	高血压;胆囊息肉	其他	陈龙	应晓洲	应晓洲	肩锁关节内固定物取出术
1070	C04综合病房	2023-09-30	2023-10-01	3426958	陈慧冬	男	40Y	取除骨折内固定装置		其他	陈龙	应晓洲	应晓洲	桡骨内固定装置去除术
1071	C04综合病房	2023-09-26	2023-10-05	3427783	施庆和	男	47Y	脾损伤	多处开放性伤口;男性盆腔炎;肋骨多处骨折;肱骨髁上骨折;髋臼骨折;脂肪肝;特发性(原发性)高血压;耻骨骨折	好转	倪仲琳	黄和	姚志超
1072	C04综合病房	2023-09-21	2023-10-05	3427931	刘满玉	女	31Y	肝挫伤	肌腱和肌肉损伤;腰椎骨折;肋骨骨折;肩胛骨骨折;气胸;胸腔积液;肺挫伤;腹腔积液;肾缺如	好转	王飞海	周磊	潘传孟
1073	C04综合病房	2023-09-27	2023-10-08	3428642	高铡中	男	42Y	创伤性脾破裂	创伤性蛛网膜下腔出血;多处挫伤;肋骨骨折;腰椎骨折;创伤性肾周血肿;胆囊息肉;肝囊肿;腹腔积液	好转	王飞海	周磊	潘传孟
1074	C04综合病房	2023-09-19	2023-10-08	3428754	李官成	男	60Y	手术后伤口裂开	多处挫伤;耻骨骨折;髂骨骨折;骶骨骨折;骨盆骨折;下肢静脉血栓形成;肠系膜出血;肠系膜裂伤;头皮开放性伤口	治愈	吴伟军	吴伟军	219152
1075	C04综合病房	2023-10-11	2023-10-13	3430845	王永妹	女	72Y	取除骨折内固定装置	骨折术后恢复期	其他	余可和	余可和	胡炜	皮肤和皮下坏死组织切除清创术;胫骨内固定装置去除术
1076	C04综合病房	2023-10-12	2023-10-13	3430847	徐建忠	男	62Y	取除骨折内固定装置	脂肪肝;肝囊肿;肾钙化;肾结石;前列腺结石	其他	杨雷	周一飞	白炳力	跟骨内固定物取出术
1077	C04综合病房	2023-10-12	2023-10-13	3430848	陈宝双	男	51Y	取除骨折内固定装置		其他	杨雷	周一飞	白炳力	骨盆内固定装置去除术;桡骨内固定装置去除术
1078	C04综合病房	2023-10-12	2023-10-13	3430849	邓茂国	男	45Y	取除骨折内固定装置	骨折治疗后恢复期	其他	杨雷	周一飞	白炳力	骨盆内固定装置去除术
1079	C04综合病房	2023-09-13	2023-10-13	3430887	夏操芳	男	60Y	肠梗阻	陈旧性耻骨骨折;肠粘连\[带\]伴有梗阻;血小板减少;手术后状态，其他特指的;主动脉瓣疾患，其他的;二尖瓣反流	治愈	杨越涛	杨越涛	徐训政	腹腔冲洗检查;腹腔镜小肠裂伤修补术;腹腔镜下肠粘连松解术
1080	C04综合病房	2023-10-12	2023-10-13	3430909	刘少英	女	53Y	取除骨折内固定装置	特发性(原发性)高血压	其他	杨雷	周一飞	白炳力	骨盆内固定装置去除术
1081	C04综合病房	2023-10-12	2023-10-14	3431208	郑维都	男	40Y	取除骨折内固定装置	后天性肾囊肿;脂肪肝;前列腺结石;肾结石	其他	陈华	孙辽军	蔡乐益	跟骨内固定物取出术
1082	C04综合病房	2023-10-12	2023-10-14	3431265	刘映芬	女	48Y	取除骨折内固定装置	脂肪肝;脊椎松解	其他	陈华	孙辽军	蔡乐益	踝关节内固定装置去除术
1083	C04综合病房	2023-10-12	2023-10-14	3431286	李志平	男	56Y	取除骨折内固定装置	腰椎退行性病变;肝囊肿;前列腺结石	其他	倪文飞	王胜	万峻莱	椎骨内固定物取出术
1084	C04综合病房	2023-10-14	2023-10-15	3431570	方跃文	男	43Y	取除骨折内固定装置	高血压;肾结石	其他	陈龙	应晓洲	应晓洲	股骨内固定装置去除术
1085	C04综合病房	2023-10-14	2023-10-15	3431572	唐通光	男	52Y	取除骨折内固定装置	冈上肌肌肉损伤;脂肪肝;胆囊结石	其他	陈龙	应晓洲	应晓洲	肩峰成形术;肩胛骨内固定装置去除术
1086	C04综合病房	2023-10-14	2023-10-15	3431823	杨培增	男	60Y	取除骨折内固定装置		其他	陈龙	应晓洲	应晓洲	踝关节内固定装置去除术
1087	C04综合病房	2023-10-14	2023-10-15	3431883	吴冰洁	女	30Y	取除骨折内固定装置		其他	陈龙	应晓洲	应晓洲	桡骨内固定装置去除术
1088	C04综合病房	2023-10-15	2023-10-16	3432202	叶建英	女	39Y	取除骨折内固定装置	肾错构瘤	其他	余可和	胡炜	胡炜	肩锁关节内固定物取出术
1089	C04综合病房	2023-10-14	2023-10-16	3432271	陈灯荣	男	61Y	取除骨折内固定装置	脂肪肝;肾结石	其他	洪建军	卢晓郎	219049	皮肤瘢痕切除术;踝关节内固定装置去除术
1090	C04综合病房	2023-10-16	2023-10-17	3432778	陈庆根	男	33Y	取除骨折内固定装置	脂肪肝	其他	杨雷	周一飞	白炳力	尺骨内固定装置去除术
1091	C04综合病房	2023-10-16	2023-10-17	3432779	周钗妹	女	50Y	取除骨折内固定装置	软组织感染;肾钙化	其他	杨雷	周一飞	白炳力	皮肤和皮下坏死组织切除清创术;腓骨内固定装置去除术
1092	C04综合病房	2023-10-09	2023-10-17	3432785	陈方贤	男	66Y	肠系膜出血	上颌窦炎;多发性脑梗死;老年性脑萎缩;特发性(原发性)高血压;2型糖尿病;痴呆;腹腔积血;髋臼骨折;肋骨骨折;胸腔积液;多处挫伤;脂膜炎	治愈	吴伟军	吴伟军	219152
1093	C04综合病房	2023-09-03	2023-10-18	3433224	黄红春	男	41Y	乙状结肠损伤	慢性阑尾炎;肺不张;髂骨骨折;创伤性肠破裂;横结肠损伤;腹直肌断裂;腹腔粘连	治愈	王飞海	周磊	潘传孟	结肠造口术;腹腔镜下乙状结肠部分切除术;腹壁伤口清创术;阑尾切除术;结肠破裂修补术;小肠破裂修补术
1094	C04综合病房	2023-10-17	2023-10-18	3433258	陈景忠	男	63Y	取除骨折内固定装置	肝囊肿	其他	陈龙	应晓洲	应晓洲	跟骨内固定物取出术
1095	C04综合病房	2023-10-17	2023-10-18	3433263	张作进	男	40Y	取除骨折内固定装置	肝囊肿	其他	陈龙	应晓洲	应晓洲	跖骨内固定装置去除术
1096	C04综合病房	2023-10-17	2023-10-18	3433264	汤英	女	57Y	取除骨折内固定装置	脂肪肝	其他	陈龙	应晓洲	应晓洲	肱骨内固定装置去除术
1097	C04综合病房	2023-10-17	2023-10-18	3433265	练爱菊	女	56Y	取除骨折内固定装置	后天性肾囊肿;手术后状态，其他特指的	其他	余可和	胡炜	胡炜	锁骨内固定装置去除术
1098	C04综合病房	2023-10-17	2023-10-18	3433398	王岩希	男	48Y	取除骨折内固定装置	胆囊结石;肾结石;脂肪肝	其他	余可和	胡炜	胡炜	胫骨内固定装置去除术
1099	C04综合病房	2023-10-15	2023-10-19	3433527	卢兴妹	男	67Y	单侧腹股沟斜疝	直肠恶性肿瘤个人史;睾丸囊肿;肋骨多处骨折;手术后状态，其他特指的;特发性(原发性)高血压;主动脉瓣疾患，其他的;下肢动脉粥样硬化	治愈	杨越涛	王奕庚	徐训政	腹腔镜下单侧腹股沟斜疝修补术
1100	C04综合病房	2023-10-19	2023-10-20	3433882	麻秀善	女	70Y	取除骨折内固定装置	2型糖尿病;脂肪肝;脾囊肿;后天性肾囊肿;肾错构瘤	其他	杨雷	周一飞	白炳力	跖骨内固定装置去除术
1101	C04综合病房	2023-10-19	2023-10-20	3433884	庄月贞	女	60Y	取除骨折内固定装置	2型糖尿病;脂肪肝	其他	杨雷	周一飞	白炳力	髌骨内固定装置去除术
1102	C04综合病房	2023-10-21	2023-10-22	3434935	金所灯	男	36Y	取除骨折内固定装置		其他	洪建军	卢晓郎	219049	皮肤瘢痕切除术;跖骨内固定装置去除术
1103	C04综合病房	2023-10-21	2023-10-22	3434942	李华玉	男	33Y	取除骨折内固定装置	错构瘤病;脂肪瘤	其他	陈龙	应晓洲	应晓洲	踝关节内固定装置去除术
1104	C04综合病房	2023-10-21	2023-10-22	3434943	侯亦华	男	59Y	取除骨折内固定装置	肺的其他疾患;肺部感染;脂肪肝	其他	陈龙	应晓洲	应晓洲	跟骨内固定物取出术
1105	C04综合病房	2023-10-21	2023-10-23	3435266	池连平	女	51Y	取除骨折内固定装置	脂肪肝	其他	陈华	孙辽军	蔡乐益	锁骨内固定装置去除术
1106	C04综合病房	2023-10-21	2023-10-24	3435884	喻文才	男	47Y	取除骨折内固定装置		其他	陈龙	应晓洲	应晓洲	跖骨内固定装置去除术
1107	C04综合病房	2023-10-23	2023-10-25	3436339	李建林	男	37Y	取除骨折内固定装置	前列腺结石	其他	余可和	胡炜	胡炜	桡骨内固定装置去除术;肱骨内固定装置去除术;皮肤瘢痕切除术
1108	C04综合病房	2023-10-24	2023-10-25	3436342	张金菊	女	65Y	取除骨折内固定装置	老年性心脏病;脂肪肝	其他	赵友明	柯陈荣	219048	踝关节内固定装置去除术;胫骨内固定装置去除术
1109	C04综合病房	2023-10-25	2023-10-26	3436580	刘靖	女	37Y	取除骨折内固定装置	脂肪肝	其他	杨雷	周一飞	白炳力	踝关节内固定装置去除术
1110	C04综合病房	2023-10-25	2023-10-26	3436727	周峰华	男	46Y	取除骨折内固定装置		其他	杨雷	周一飞	白炳力	胫骨内固定装置去除术
1111	C04综合病房	2023-10-26	2023-10-27	3436994	章步桂	男	48Y	取除骨折内固定装置	脂肪肝	其他	陈龙	应晓洲	应晓洲	桡骨内固定装置去除术
1112	C04综合病房	2023-10-26	2023-10-28	3437125	王金鹏	男	41Y	骨折术后恢复期	后天性肾囊肿;脂肪肝;肾结石	其他	陈华	孙辽军	蔡乐益	桡骨内固定装置去除术
1113	C04综合病房	2023-10-26	2023-10-28	3437126	张小奇	女	23Y	取除骨折内固定装置		其他	陈华	孙辽军	蔡乐益	胫骨内固定装置去除术
1114	C04综合病房	2023-10-28	2023-10-29	3437907	陈茶兰	女	57Y	取除骨折内固定装置		其他	陈龙	应晓洲	应晓洲	踝关节内固定装置去除术
1115	C04综合病房	2023-10-28	2023-10-29	3437912	金建成	男	39Y	取除骨折内固定装置	脂肪肝;肾结石	其他	陈龙	应晓洲	应晓洲	肩锁关节内固定物取出术
1116	C04综合病房	2023-10-28	2023-10-29	3437913	潘林仙	女	55Y	取除骨折内固定装置	后天性肾囊肿;脂肪肝;高血压	其他	余可和	胡炜	胡炜	皮肤瘢痕切除术;踝关节内固定装置去除术;胫骨内固定装置去除术
1117	C04综合病房	2023-10-28	2023-10-29	3437920	郑芬燕	女	51Y	取除骨折内固定装置	乙型肝炎小三阳	其他	陈龙	应晓洲	应晓洲	踝关节内固定装置去除术
1118	C04综合病房	2023-10-28	2023-10-30	3438464	韦少同	男	36Y	取除骨折内固定装置		其他	陈龙	应晓洲	应晓洲	胫骨内固定装置去除术
1119	C04综合病房	2023-10-19	2023-10-31	3438876	金向阳	男	46Y	肝挫伤	肋骨多处骨折;腰椎骨折;腹腔积血;后天性肾囊肿;胸腔积液;肺挫伤	好转	杨越涛	王奕庚	徐训政
1120	C04综合病房	2023-10-31	2023-10-31	3439026	邓娥	女	8Y	取除骨折内固定装置		其他	陈龙	应晓洲	应晓洲	尺骨内固定装置去除术
1121	C04综合病房	2023-10-03	2023-10-31	3439037	徐文才	男	67Y	急性梗阻性胆管炎	胆囊结石;胆总管结石;脂肪肝;腹腔积液;癫痫;脑外伤后综合征;下肢动脉粥样硬化;下肢静脉血栓形成;陈旧性锁骨骨折;腹股沟斜疝;胸腔积液;急性胆囊炎	好转	杨越涛	王奕庚	徐训政	胆道镜检查术;胆总管切开取石术;腹腔镜下胆囊切除术;胆管引流术
1122	C04综合病房	2023-10-30	2023-11-01	3439067	吴丁钱	男	60Y	取除骨折内固定装置	特发性(原发性)高血压;2型糖尿病;心功能不全;脂肪肝;肾结石;前列腺结石	其他	王振文	余洋	徐宏威	踝关节内固定装置去除术
1123	C04综合病房	2023-10-30	2023-11-01	3439123	谷碎莲	女	37Y	取除骨折内固定装置	慢性乙型病毒性肝炎;肾结石;肺部感染;肺间质纤维化	其他	陈华	孙辽军	蔡乐益	踝关节内固定装置去除术
1124	C04综合病房	2023-10-30	2023-11-01	3439125	何小华	女	66Y	取除骨折内固定装置	骨质疏松;下肢动脉粥样硬化;肋骨多处骨折	其他	陈华	孙辽军	蔡乐益	股骨内固定装置去除术
1125	C04综合病房	2023-10-31	2023-11-01	3439391	李爱玉	女	65Y	取除骨折内固定装置	胆囊结石;肾结石	其他	陈龙	应晓洲	应晓洲	尺骨内固定装置去除术
1126	C04综合病房	2023-10-31	2023-11-01	3439392	郑玉书	男	32Y	取除骨折内固定装置		其他	陈龙	应晓洲	应晓洲	尺骨内固定装置去除术
1127	C04综合病房	2023-10-31	2023-11-01	3439522	薛仙桃	女	57Y	取除骨折内固定装置	后天性肾囊肿	其他	陈龙	应晓洲	应晓洲	踝关节内固定装置去除术
1128	C04综合病房	2023-10-31	2023-11-02	3439653	陈丽君	女	22Y	取除骨折内固定装置		其他	余可和	胡炜	胡炜	踝关节内固定装置去除术;皮肤瘢痕切除术
1129	C04综合病房	2023-11-01	2023-11-02	3439823	刘毅	男	37Y	取除骨折内固定装置	胆囊息肉	其他	洪建军	卢晓郎		尺骨内固定装置去除术;皮肤瘢痕切除术
1130	C04综合病房	2023-11-01	2023-11-02	3439832	姚鹏	男	38Y	取除骨折内固定装置	脂肪肝;前列腺结石	其他	杨雷	周一飞	白炳力	踝关节内固定装置去除术
1131	C04综合病房	2023-11-01	2023-11-03	3440036	黄莲莲	女	72Y	取除骨折内固定装置	脂肪肝;后天性肾囊肿;肾钙化;老年性心脏病	其他	余可和	胡炜	胡炜	股骨内固定装置去除术
1132	C04综合病房	2023-11-01	2023-11-03	3440037	翁小飞	女	65Y	取除骨折内固定装置	膝关节退行性病变;脂肪肝;肝囊肿;肾积水伴肾结石	其他	余可和	胡炜	胡炜	胫骨内固定装置去除术
1133	C04综合病房	2023-10-30	2023-11-05	3440777	周云巧	男	70Y	肠梗阻	消化器官恶性肿瘤个人史;生殖器官恶性肿瘤个人史;肝囊肿;后天性肾囊肿;腹腔积液;胸腔积液;肋骨骨折;锁骨骨折	治愈	王飞海	周磊	潘传孟
1134	C04综合病房	2023-11-04	2023-11-05	3440958	黄丽棠	女	36Y	取除骨折内固定装置	乙型病毒性肝炎	其他	陈龙	应晓洲	应晓洲	踝关节内固定装置去除术
1135	C04综合病房	2023-11-04	2023-11-05	3440966	林碎操	男	49Y	取除骨折内固定装置	腰椎间盘突出;肝囊肿	其他	陈龙	应晓洲	应晓洲	胫骨内固定装置去除术
1136	C04综合病房	2023-11-04	2023-11-06	3441316	周莉莉	女	49Y	取除骨折内固定装置	肺钙化	其他	陈龙	应晓洲	应晓洲	跟骨内固定物取出术
1137	C04综合病房	2023-11-06	2023-11-07	3441896	王登锋	男	28Y	取除骨折内固定装置		其他	杨雷	周一飞	白炳力	胫骨内固定装置去除术
1138	C04综合病房	2023-11-08	2023-11-08	3442686	王忠旗	男	51Y	骨折术后恢复期	肝囊肿;前列腺结石;脂肪肝;由于其他原因而未进行操作	其他	余可和	胡炜	胡炜
1139	C04综合病房	2023-11-07	2023-11-09	3442820	叶俊英	男	43Y	取除骨折内固定装置	肺诊断性影像异常;肾结石	其他	杨雷	周一飞	白炳力	跟骨内固定物取出术;跖骨内固定装置去除术
1140	C04综合病房	2023-11-09	2023-11-09	3442991	梅山社	男	55Y	骨折术后恢复期	脂肪肝;胆囊结石;肝血管瘤;由于其他原因而未进行操作	其他	陈龙	应晓洲	应晓洲
1141	C04综合病房	2023-11-08	2023-11-10	3443123	洪燕	女	49Y	取除骨折内固定装置	胆囊结石	其他	余可和	余可和	胡炜	跖骨内固定装置去除术
1142	C04综合病房	2023-11-09	2023-11-10	3443154	徐元良	男	31Y	取除骨折内固定装置		其他	陈龙	应晓洲	应晓洲	胫骨内固定装置去除术
1143	C04综合病房	2023-11-09	2023-11-10	3443155	宋广华	男	52Y	取除骨折内固定装置	脂肪肝	其他	陈龙	应晓洲	应晓洲	桡骨内固定装置去除术
1144	C04综合病房	2023-11-09	2023-11-11	3443557	朱绍明	男	65Y	肱骨外科颈骨折	肩袖损伤;脂肪肝	治愈	陈龙	应晓洲	应晓洲	肱骨骨折切开复位钢板内固定术;肩袖修补术
1145	C04综合病房	2023-11-11	2023-11-12	3444090	刘利存	男	54Y	取除骨折内固定装置	后天性肾囊肿	其他	陈龙	应晓洲	应晓洲	锁骨内固定装置去除术
1146	C04综合病房	2023-11-11	2023-11-12	3444091	邓宇商	男	22Y	取除骨折内固定装置	脂肪肝;肝回声不均	其他	陈龙	应晓洲	应晓洲	胫骨内固定装置去除术
1147	C04综合病房	2023-11-11	2023-11-12	3444093	计爱眉	女	62Y	取除骨折内固定装置	肝血管瘤;二尖瓣反流;心功能不全;退行性主动脉瓣疾患	其他	陈龙	应晓洲	应晓洲	腓骨内固定装置去除术;踝关节内固定装置去除术
1148	C04综合病房	2023-11-13	2023-11-14	3445062	王永冰	男	59Y	取除骨折内固定装置	慢性乙型病毒性肝炎;冠状动脉粥样硬化性心脏病;下肢动脉粥样硬化;脂肪肝;后天性肾囊肿	其他	陈华	孙辽军	蔡乐益	踝关节内固定装置去除术
1149	C04综合病房	2023-11-13	2023-11-14	3445064	庄秀权	男	60Y	取除骨折内固定装置	糖尿病;脂肪肝	其他	杨雷	周一飞	白炳力	胫骨内固定装置去除术
1150	C04综合病房	2023-10-25	2023-11-15	3445515	李纯学	男	49Y	肝挫伤	胸腔积液;腹腔积液;肝功能检查的异常结果;肋骨多处骨折;骶骨骨折;髂骨骨折;耻骨骨折;肾上腺血肿;头皮血肿	治愈	杨越涛	王奕庚	徐训政	超声引导下胸腔穿刺术
1151	C04综合病房	2023-11-14	2023-11-15	3445518	郭必杯	男	46Y	取除骨折内固定装置		其他	陈龙	应晓洲	应晓洲	髌骨内固定装置去除术
1152	C04综合病房	2023-10-30	2023-11-15	3445519	郭盛福	男	46Y	创伤性脾破裂	失血性休克;蛛网膜下出血;创伤性气胸;肋骨骨折;腓骨骨折;肩胛骨骨折;锁骨骨折	治愈	王飞海	周磊	潘传孟	全脾切除术;腹腔冲洗检查
1153	C04综合病房	2023-11-14	2023-11-15	3445524	戴永美	女	78Y	取除骨折内固定装置		其他	陈龙	应晓洲	应晓洲	外固定装置取出术
1154	C04综合病房	2023-11-15	2023-11-17	3446168	黄程豪	男	27Y	取除骨折内固定装置	脂肪肝;骨质疏松	其他	余可和	胡炜	胡炜	跖骨内固定装置去除术
1155	C04综合病房	2023-11-15	2023-11-17	3446180	沈晓颖	女	30Y	取除骨折内固定装置	后天性肾囊肿	其他	余可和	胡炜	胡炜	踝关节内固定装置去除术
1156	C04综合病房	2023-11-11	2023-11-18	3446729	叶永案	男	45Y	跟骨骨折		治愈	陈龙	应晓洲	应晓洲	跟骨骨折切开复位钢针内固定术;跟骨人工骨植骨术
1157	C04综合病房	2023-11-18	2023-11-19	3447155	孙素娟	女	54Y	取除骨折内固定装置	脂肪肝	其他	陈龙	应晓洲	应晓洲	桡骨内固定装置去除术
1158	C04综合病房	2023-11-18	2023-11-19	3447156	李玲英	女	60Y	取除骨折内固定装置	脂肪肝;肾结石;心功能不全	其他	陈龙	应晓洲	应晓洲	髌骨内固定装置去除术
1159	C04综合病房	2023-11-18	2023-11-19	3447238	柯忠堂	男	59Y	取除骨折内固定装置	下肢动脉粥样硬化;手术后状态，其他特指的;心功能不全	其他	陈龙	应晓洲	应晓洲	股骨内固定装置去除术
1160	C04综合病房	2023-11-18	2023-11-20	3447636	周三锋	男	37Y	取除骨折内固定装置	脂肪肝	其他	陈龙	应晓洲	应晓洲	跟骨内固定物取出术
1161	C04综合病房	2023-11-20	2023-11-22	3448421	吴敬福	男	68Y	取除骨折内固定装置	脂肪肝	其他	杨雷	周一飞	白炳力	肩锁关节内固定物取出术
1162	C04综合病房	2023-11-20	2023-11-22	3448467	王小萍	女	45Y	取除骨折内固定装置	脂肪肝;后天性肾囊肿	其他	陈华	孙辽军	蔡乐益	桡神经探查术;肱骨内固定装置去除术
1163	C04综合病房	2023-11-20	2023-11-22	3448623	谢秉生	男	61Y	取除骨折内固定装置	脂肪肝;前列腺结石	其他	陈华	孙辽军	蔡乐益	胫骨内固定装置去除术
1164	C04综合病房	2023-11-21	2023-11-22	3448645	吴志环	男	57Y	取除骨折内固定装置	胆囊结石;肺气肿	其他	洪建军	卢晓郎		腓骨内固定装置去除术;踝关节内固定装置去除术
1165	C04综合病房	2023-11-23	2023-11-23	3449147	陈春	男	40Y	取除骨折内固定装置	后天性肾囊肿;肺诊断性影像异常	其他	陈华	孙辽军	蔡乐益	踝关节内固定装置去除术
1166	C04综合病房	2023-11-22	2023-11-24	3449252	陈凤英	女	65Y	取除骨折内固定装置		其他	杨雷	周一飞	白炳力	跖骨内固定装置去除术
1167	C04综合病房	2023-11-22	2023-11-24	3449263	叶阿巧	男	69Y	取除骨折内固定装置	2型糖尿病;特发性(原发性)高血压	其他	杨雷	周一飞	白炳力	尺骨内固定装置去除术
1168	C04综合病房	2023-11-22	2023-11-24	3449292	林超	男	33Y	取除骨折内固定装置		其他	杨雷	周一飞	白炳力	髌骨内固定装置去除术
1169	C04综合病房	2023-11-23	2023-11-25	3449808	黄明礼	男	53Y	取除骨折内固定装置	脂肪肝;高血糖素分泌增多	其他	陈龙	应晓洲	应晓洲	跟骨内固定物取出术
1170	C04综合病房	2023-11-25	2023-11-26	3450271	金钇汝	女	22Y	取除骨折内固定装置		其他	汤骏	吴剑彬	吴剑彬	踝关节内固定装置去除术
1171	C04综合病房	2023-11-25	2023-11-26	3450308	游梦伟	男	27Y	取除骨折内固定装置	胆囊息肉	其他	陈龙	应晓洲	应晓洲	胫骨内固定装置去除术
1172	C04综合病房	2023-11-25	2023-11-27	3450743	徐胜茂	男	50Y	取除骨折内固定装置	脂肪肝;胆囊结石	其他	陈龙	应晓洲	应晓洲	跟骨内固定物取出术
1173	C04综合病房	2023-11-27	2023-11-29	3451632	钱文畅	男	51Y	取除骨折内固定装置	脂肪肝	其他	陈华	孙辽军	蔡乐益	跟骨内固定物取出术
1174	C04综合病房	2023-11-27	2023-11-29	3451648	杜佐会	男	57Y	取除骨折内固定装置	后天性肾囊肿	其他	杨雷	周一飞	白炳力	跟骨内固定物取出术
1175	C04综合病房	2023-11-28	2023-11-29	3451765	林宝荣	男	61Y	取除骨折内固定装置	胆囊息肉	其他	陈龙	应晓洲	应晓洲	踝关节内固定装置去除术
1176	C04综合病房	2023-11-28	2023-11-29	3451778	黄韻琴	女	68Y	取除骨折内固定装置	脂肪肝;胆囊结石	其他	陈龙	应晓洲	应晓洲	踝关节内固定装置去除术
1177	C04综合病房	2023-11-28	2023-11-29	3451780	项艺馨	女	4Y	肱骨髁上骨折		治愈	陈龙	应晓洲	应晓洲	肱骨骨折闭合复位钢针内固定术
1178	C04综合病房	2023-11-27	2023-11-29	3451782	黄灿	男	37Y	取除骨折内固定装置	骨折术后恢复期;前列腺结石;泌尿器官诊断性影像检查的异常所见	其他	杨雷	周一飞	白炳力	股骨内固定装置去除术
1179	C04综合病房	2023-10-15	2023-11-29	3451829	林文松	男	82Y	急性胃溃疡伴有穿孔	呼吸心跳骤停;脓毒性休克;多脏器功能衰竭;急性腹膜炎;操作后的感染，不可归类在他处者;手术后切口感染;胆汁淤积性肝炎;肺部感染;急性心肌梗死;髌骨骨折;下肢静脉血栓形成;肠梗阻;心房颤动;心律失常;窦性静止	死亡	倪仲琳	黄和	姚志超	全胃切除伴食管空肠吻合术;胃溃疡穿孔修补术;股动脉造影;股动脉栓塞术;下肢静脉滤器置入术;腹腔动脉造影
1180	C04综合病房	2023-11-28	2023-11-30	3452205	邱朝全	男	49Y	取除骨折内固定装置	胆囊息肉;胸腔积液;肺诊断性影像异常	其他	陈龙	应晓洲	应晓洲	踝关节内固定装置去除术
1181	C04综合病房	2023-11-27	2023-12-02	3452505	汤天宋	男	84Y	腹股沟嵌顿性滑疝	股骨粗隆间骨折;特发性(原发性)高血压;慢性胃炎;肺部感染;肺大疱;主动脉钙化	治愈	倪仲琳	黄和	姚志超	单侧腹股沟直疝斜疝无张力修补术
1182	C04综合病房	2023-12-02	2023-12-03	3453298	胡亮亮	男	22Y	取除骨折内固定装置		其他	陈龙	应晓洲	应晓洲	肩锁关节内固定物取出术
1183	C04综合病房	2023-12-02	2023-12-03	3453299	夏华杰	男	30Y	取除骨折内固定装置		其他	汤骏	吴剑彬	吴剑彬	锁骨内固定装置去除术
1184	C04综合病房	2023-12-02	2023-12-03	3453302	秦明军	男	54Y	取除骨折内固定装置		其他	陈龙	应晓洲	应晓洲	踝关节内固定装置去除术
1185	C04综合病房	2023-12-02	2023-12-04	3453769	潘彪彪	男	38Y	取除骨折内固定装置	脂肪肝;胆囊息肉	其他	杨雷	周一飞	白炳力	跖骨内固定装置去除术
1186	C04综合病房	2023-12-04	2023-12-05	3454262	李建中	男	32Y	取除骨折内固定装置		其他	洪建军	卢晓郎	卢晓郎	胫骨内固定装置去除术
1187	C04综合病房	2023-12-04	2023-12-06	3454488	金正明	男	57Y	取除骨折内固定装置	脂肪肝;肾结石;后天性肾囊肿	其他	杨雷	周一飞	白炳力	胫骨内固定装置去除术;外固定装置取出术;皮肤瘢痕切除术
1188	C04综合病房	2023-12-07	2023-12-09	3455559	陈彩华	女	54Y	取除骨折内固定装置	高血压;脂肪肝;肺诊断性影像异常	其他	陈华	孙辽军	陈春慧	腓骨内固定装置去除术
1189	C04综合病房	2023-11-15	2023-12-09	3455701	刘可程	男	60Y	急性坏死性胰腺炎，重症	胆总管结石;肝内胆管结石;胰腺积液;腹腔积液;肺部感染;胸腔积液;肩胛骨骨折;胆囊切除术后状态;手术后状态，其他特指的	好转	倪仲琳	黄和	姚志超	内镜逆行胰胆管造影[ERCP];腹腔脓肿切开引流术;胰腺穿刺活检
1190	C04综合病房	2023-12-09	2023-12-10	3456055	陈认真	女	50Y	取除骨折内固定装置	特发性(原发性)高血压;肺诊断性影像异常;肺大疱	其他	杨雷	周一飞	白炳力	桡骨内固定装置去除术
1191	C04综合病房	2023-12-09	2023-12-11	3456483	古力敏	男	58Y	取除骨折内固定装置	特发性(原发性)高血压;乙型肝炎小三阳;肝囊肿;肾结石;后天性肾囊肿;前列腺结石	其他	杨雷	周一飞	白炳力	跟骨内固定物取出术
1192	C04综合病房	2023-12-09	2023-12-11	3456539	王思鸿	男	19Y	取除骨折内固定装置		其他	杨雷	周一飞	白炳力	踝关节内固定装置去除术
1193	C04综合病房	2023-12-09	2023-12-11	3456552	陈寿宗	男	48Y	取除骨折内固定装置	后天性肾囊肿	其他	陈龙	应晓洲	应晓洲	股骨内固定装置去除术
1194	C04综合病房	2023-12-09	2023-12-11	3456573	汤三娥	女	58Y	取除骨折内固定装置	脂肪肝;后天性肾囊肿	其他	杨雷	周一飞	白炳力	胫骨内固定装置去除术
1195	C04综合病房	2023-12-09	2023-12-11	3456780	金锡裕	男	49Y	取除骨折内固定装置	脂肪肝;肝囊肿	其他	陈龙	应晓洲	应晓洲	跟骨内固定物取出术
1196	C04综合病房	2023-12-04	2023-12-12	3456979	杜亦雪	女	53Y	肠梗阻	盆腔积液;后天性脾缺失;肝囊肿;陈旧性肋骨骨折	治愈	吴伟军	闻浩	叶陈敏
1197	C04综合病房	2023-12-11	2023-12-13	3457558	陈银发	男	40Y	取除骨折内固定装置	肝回声不均	其他	陈华	陈华	陈春慧	跖骨内固定装置去除术
1198	C04综合病房	2023-12-12	2023-12-13	3457763	李晨龙	男	31Y	取除骨折内固定装置		其他	陈龙	应晓洲	应晓洲	踝关节内固定装置去除术
1199	C04综合病房	2023-12-12	2023-12-13	3457764	项光豪	男	27Y	取除骨折内固定装置	脂肪肝;前列腺结石	其他	杨雷	应晓洲	应晓洲	锁骨内固定装置去除术
1200	C04综合病房	2023-12-16	2023-12-17	3459311	宋展鹏	男	43Y	取除骨折内固定装置	脂肪肝	其他	陈龙	应晓洲	应晓洲	锁骨内固定装置去除术
1201	C04综合病房	2023-12-16	2023-12-17	3459313	李建	男	43Y	掌骨骨折	肌腱和肌肉损伤;高血压;后天性脾缺失;前列腺结石	治愈	陈龙	应晓洲	应晓洲	掌骨骨折闭合复位钢针内固定术
1202	C04综合病房	2023-12-18	2023-12-19	3460251	黄锦沥	男	16Y	取除骨折内固定装置		其他	王振文	水小龙	郑亦静	骨盆内固定装置去除术
1203	C04综合病房	2023-12-18	2023-12-20	3460802	周传顺	男	45Y	取除骨折内固定装置	肝回声不均	其他	杨雷	周一飞	白炳力	锁骨内固定装置去除术
1204	C04综合病房	2023-12-04	2023-12-21	3461070	王瑞业	男	80Y	股骨骨折	腰椎骨折;腹股沟直疝嵌顿;特发性(原发性)高血压;脑梗死后遗症;中度贫血;脂肪肝;后天性肾囊肿;多发性脑梗死;老年性脑萎缩;肺部感染;胸腔积液;主动脉钙化;下肢静脉血栓形成;脑内出血	治愈	倪仲琳	黄和	姚志超	股骨骨折闭合复位髓内针内固定术;单侧腹股沟直疝无张力修补术
1205	C04综合病房	2023-12-19	2023-12-21	3461074	周宝平	男	36Y	取除骨折内固定装置		其他	王振文	余洋	郑亦静	股骨内固定装置去除术
1206	C04综合病房	2023-12-13	2023-12-23	3460313	廖平泽	男	55Y	取除骨折内固定装置	肝囊肿;胆囊息肉;后天性肾囊肿;心功能不全	其他	陈华	孙辽军	陈春慧	跟骨内固定物取出术;椎骨内固定物取出术
1207	C04综合病房	2023-11-20	2023-12-23	3462031	薛央婷	女	18Y	多处开放性伤口	失血性休克;颈部开放性损伤;胸壁多处开放性伤口;肋骨多处骨折;血气胸;开放性腹部损伤;胃破裂;小肠损伤;肠系膜损伤;腹腔积血;肠瘘;腹腔感染;脓毒性休克	好转	杨越涛	杨越涛	徐训政	胃破裂修补术;颈部探查术;皮肤和皮下坏死组织切除清创术;腹壁其他修补术;胃修补术;肠系膜修补术;腹腔冲洗检查;胸腔闭式引流术
1208	C04综合病房	2023-12-23	2023-12-24	3462246	张淑入	男	42Y	取除骨折内固定装置	下肢动脉粥样硬化;脂肪肝;后天性肾囊肿;肾肿物;心功能不全;肺的其他疾患	其他	洪建军	卢晓郎	卢晓郎	跟骨内固定物取出术;皮肤瘢痕切除术
1209	C04综合病房	2023-12-23	2023-12-24	3462310	方德强	男	46Y	取除骨折内固定装置	慢性肝病;肝钙化灶;肺的其他疾患;心功能不全	其他	洪建军	卢晓郎	卢晓郎	踝关节内固定装置去除术;皮肤瘢痕切除术
1210	C04综合病房	2023-12-23	2023-12-25	3462877	张社	男	43Y	取除骨折内固定装置	脂肪肝;胆囊结石;后天性肾囊肿;肾结石	其他	陈龙	应晓洲	应晓洲	股骨内固定装置去除术
1211	C04综合病房	2023-12-23	2023-12-25	3462879	胡建东	男	30Y	取除骨折内固定装置	胆囊结石;脂肪肝	其他	陈龙	应晓洲	应晓洲	髌骨内固定装置去除术
1212	C04综合病房	2023-12-25	2023-12-27	3463734	郑任敏	女	34Y	取除骨折内固定装置		其他	杨雷	周一飞	白炳力	肱骨内固定装置去除术
1213	C04综合病房	2023-12-26	2023-12-28	3464165	陈美凤	女	59Y	取除骨折内固定装置		其他	杨雷	周一飞	白炳力	肱骨内固定装置去除术
1214	C04综合病房	2023-12-26	2023-12-28	3464260	姚奎	男	37Y	取除骨折内固定装置	脂肪肝	其他	陈龙	应晓洲	应晓洲	跖骨内固定装置去除术
1215	C04综合病房	2023-12-26	2023-12-28	3464262	张怀水	男	56Y	取除骨折内固定装置	肝回声不均;后天性肾囊肿	其他	陈龙	应晓洲	应晓洲	跟骨内固定物取出术
1216	C04综合病房	2023-12-28	2023-12-29	3464481	周茜茜	女	33Y	取除骨折内固定装置		其他	王振文	水小龙	郑亦静	踝关节内固定装置去除术
1217	C04综合病房	2023-12-30	2023-12-31	3465494	巨赫文	女	49Y	取除骨折内固定装置	脂肪肝	其他	陈龙	应晓洲	应晓洲	踝关节内固定装置去除术
1218	C05疼痛科	2022-12-10	2023-01-03	3314753	金赤虹	男	72Y	骨质疏松伴病理性骨折	颈椎关节强硬;硬脑膜下积液;高血压病;多发性肝囊肿;肺大泡	好转	许峰	许峰	何伶俐
1219	C05疼痛科	2022-12-17	2023-01-07	3316016	朱秀兰	女	80Y	腰椎间盘突出	骨质疏松伴病理性骨折;肺部感染	治愈	占恭豪	占恭豪	王佩芳	椎管扩大成形术（经椎间孔镜）;椎间盘射频消融术;神经根管松解术;腰椎间盘髓核切除伴椎板切除术
1220	C05疼痛科	2023-01-07	2023-01-11	3317735	刘丽珍	女	73Y	骨质疏松伴病理性骨折		好转	占恭豪	占恭豪	王佩芳
1221	C05疼痛科	2023-01-03	2023-01-12	3318400	金来香	女	82Y	骨质疏松伴病理性骨折	高血压病	好转	占恭豪	王佩芳	田心毅
1222	C05疼痛科	2023-01-07	2023-01-12	3318433	厉兰香	女	71Y	骨质疏松伴病理性骨折	原发性双侧膝关节病;人工髋关节	好转	占恭豪	占恭豪	田心毅
1223	C05疼痛科	2023-01-14	2023-01-17	3320422	倪玉香	女	77Y	骨质疏松伴病理性骨折	高血压病;多发性肝囊肿	好转	许峰	许峰	黄茜茜
1224	C05疼痛科	2022-12-18	2023-01-18	3320677	孙阿高	女	76Y	骨质疏松伴病理性骨折	肾结石;高血压病;2型糖尿病;腔隙性脑梗死	好转	许峰	许峰	何伶俐
1225	C05疼痛科	2023-01-15	2023-01-28	3324964	张少薇	女	85Y	骨质疏松伴病理性骨折	椎管狭窄;低色素性小红细胞性贫血;心房颤动;具有假体心脏瓣膜	好转	许峰	许峰	何伶俐
1226	C05疼痛科	2023-01-24	2023-02-01	3326877	姜成琴	女	71Y	骨质疏松伴病理性骨折	呼吸道感染;肱骨外上髁炎;高血压病	好转	占恭豪	占恭豪	王佩芳
1227	C05疼痛科	2023-01-24	2023-02-02	3327413	章芬芬	女	68Y	颈椎关节强硬	肩周炎;骨质疏松伴病理性骨折	治愈	占恭豪	占恭豪	王佩芳	椎管扩大成形术（经椎间孔镜）;椎间盘射频消融术;神经根管松解术;颈椎间盘切除伴椎板切除术
1228	C05疼痛科	2023-02-13	2023-02-16	3331585	严春花	女	71Y	腰椎间盘突出	帕金森病;骨质疏松伴病理性骨折;腰椎椎管狭窄	好转	占恭豪	申帮利	申帮利
1229	C05疼痛科	2023-02-11	2023-02-18	3332049	林莲英	女	72Y	骨质疏松伴病理性骨折		好转	占恭豪	王佩芳	田心毅
1230	C05疼痛科	2023-02-11	2023-02-18	3332082	庄志浩	男	68Y	骨质疏松伴病理性骨折	2型糖尿病;高血压病;腰椎间盘突出	好转	占恭豪	王佩芳	田心毅
1231	C05疼痛科	2023-02-11	2023-02-18	3332237	王莲英	女	77Y	骨质疏松伴病理性骨折	下肢动脉粥样硬化;下肢静脉血栓形成;高血压病	好转	占恭豪	王佩芳	田心毅
1232	C05疼痛科	2023-02-12	2023-02-20	3333189	柯龙凤	女	69Y	骨质疏松伴病理性骨折	直肠肿物;混合痔	好转	许峰	许峰	黄茜茜
1233	C05疼痛科	2023-02-14	2023-02-22	3333812	潘雪奶	女	86Y	三叉神经痛	骨质疏松伴病理性骨折;脊柱骨折	好转	占恭豪	王佩芳	田心毅
1234	C05疼痛科	2023-02-18	2023-02-26	3335576	黄永木	男	70Y	骨质疏松伴病理性骨折	类风湿性关节炎;肺部感染;支气管扩张;高血压病;2型糖尿病	好转	许峰	吴彬彬	黄茜茜
1235	C05疼痛科	2023-02-12	2023-03-04	3337781	白梅弟	女	85Y	骨质疏松伴病理性骨折	高血压病	好转	许峰	吴彬彬	黄茜茜
1236	C05疼痛科	2023-02-26	2023-03-05	3338144	张笑秋	女	61Y	骨质疏松伴病理性骨折		好转	许峰	吴彬彬	黄茜茜
1237	C05疼痛科	2023-03-01	2023-03-09	3340144	王柳英	女	82Y	腰椎椎管狭窄	骨质疏松伴病理性骨折;高血压病;2型糖尿病;冠状动脉粥样硬化性心脏病	治愈	占恭豪	申帮利	申帮利
1238	C05疼痛科	2023-02-28	2023-03-09	3340161	叶彩霞	女	79Y	骨质疏松伴病理性骨折	乳房恶性肿瘤个人史;肾结石;高血压病	好转	许峰	吴彬彬	黄茜茜
1239	C05疼痛科	2023-03-05	2023-03-11	3340868	徐秋艳	女	48Y	恶性肿瘤的维持性化疗	骨折治疗后恢复期;化疗后骨髓抑制;肝囊肿;卵巢恶性肿瘤;肺结节	好转	吴剑	吴剑	黄选章
1240	C05疼痛科	2023-03-05	2023-03-12	3340987	周家明	男	53Y	椎管狭窄	腰椎间盘突出;肋骨骨折	好转	许峰	吴彬彬	黄茜茜	腰椎间盘切除伴椎板切除术;神经根管松解术;椎管扩大成形术，单开门;椎间盘射频消融术
1241	C05疼痛科	2023-03-11	2023-03-14	3341969	李茂发	男	86Y	骨质疏松伴病理性骨折		好转	占恭豪	王佩芳	田心毅
1242	C05疼痛科	2023-03-11	2023-03-14	3342026	凌柱花	女	80Y	骨质疏松伴病理性骨折	腰椎间盘突出	好转	占恭豪	王佩芳	田心毅
1243	C05疼痛科	2023-03-11	2023-03-18	3343309	王冬菊	女	84Y	骨质疏松伴病理性骨折	下肢动脉粥样硬化;冠状动脉支架植入后状态;高血压病;2型糖尿病;胸椎骨折	好转	占恭豪	王佩芳	田心毅
1244	C05疼痛科	2023-03-11	2023-03-18	3343321	张宪兰	女	69Y	骨质疏松伴有病理性骨折	脊柱压缩性骨折;高血压病;2型糖尿病	好转	占恭豪	王佩芳	田心毅
1245	C05疼痛科	2023-03-06	2023-03-18	3343438	项玉竹	女	73Y	骨质疏松伴病理性骨折	下肢动脉粥样硬化;腰椎间盘突出;退行性主动脉瓣疾患;主动脉瓣关闭不全	治愈	王向阳	盛孙仁	盛孙仁	胸椎骨折切开复位内固定术;胸骨螺钉内固定术;胸椎骨折球囊扩张成形术
1246	C05疼痛科	2023-03-04	2023-03-19	3344190	赵金梭	女	85Y	骨质疏松伴有病理性骨折，其他的	肠道感染;心房颤动	好转	占恭豪	王佩芳	田心毅
1247	C05疼痛科	2023-03-11	2023-03-20	3344473	杨春株	男	77Y	骨质疏松伴病理性骨折	高血压病;2型糖尿病	好转	许峰	许峰	黄茜茜
1248	C05疼痛科	2023-03-18	2023-03-22	3345443	周国雄	男	75Y	骨质疏松伴病理性骨折	脊柱骨折;腰肌劳损	治愈	占恭豪	王佩芳	田心毅
1249	C05疼痛科	2023-03-14	2023-03-22	3345526	李扎孝	男	54Y	喉恶性肿瘤	2型糖尿病性视网膜病变;慢性乙型病毒性肝炎;胸椎骨折;黄斑水肿;骨继发恶性肿瘤;颈部淋巴结继发恶性肿瘤;肺结节;双眼白内障	好转	吴剑	吴剑	218358
1250	C05疼痛科	2023-03-18	2023-03-25	3346193	蔡娇妹	女	93Y	腰椎间盘突出	骨质疏松伴病理性骨折;高血压病;2型糖尿病;股骨粗隆间骨折;骶骨骨折;腰椎骨折;下肢静脉血栓形成	好转	占恭豪	王佩芳	田心毅
1251	C05疼痛科	2023-03-05	2023-03-26	3346720	欧珠	女	66Y	黄韧带骨化	2型糖尿病;陈旧性肋骨骨折;焦虑状态	好转	许峰	许峰	黄茜茜	连续硬膜外阻滞术;周围神经破坏术
1252	C05疼痛科	2023-03-18	2023-03-28	3347612	郑秀琴	女	86Y	骨质疏松伴病理性骨折	胸腺良性肿瘤	好转	占恭豪	王佩芳	田心毅
1253	C05疼痛科	2023-03-19	2023-04-01	3349100	黄梅云	女	70Y	骨质疏松伴病理性骨折	胸椎骨折	好转	占恭豪	王佩芳	田心毅
1254	C05疼痛科	2023-03-28	2023-04-04	3350508	郑翠妹	女	84Y	骨质疏松伴病理性骨折		好转	占恭豪	占恭豪	黄茜茜
1255	C05疼痛科	2023-04-01	2023-04-08	3351760	徐玉璟	女	81Y	骨质疏松伴病理性骨折	高血压病;2型糖尿病	好转	占恭豪	占恭豪	黄茜茜
1256	C05疼痛科	2023-03-15	2023-04-09	3352466	周祝娒	男	67Y	放射治疗疗程	陈旧性肋骨骨折;为肿瘤化学治疗疗程;后天性肾囊肿;呼吸道感染;食管恶性肿瘤;肝继发恶性肿瘤;肝囊肿	好转	陈文俊	陈文俊	吴聪聪
1257	C05疼痛科	2023-04-01	2023-04-12	3353401	叶连华	女	70Y	骨质疏松伴病理性骨折		好转	占恭豪	王佩芳	王佩芳
1258	C05疼痛科	2023-03-31	2023-04-15	3354342	黄松英	女	62Y	骨质疏松伴有病理性骨折	脊椎应力性骨折;特指手术后状态	好转	许峰	王佩芳	王佩芳
1259	C05疼痛科	2023-04-04	2023-04-15	3354421	卢庆礼	男	80Y	骨质疏松伴病理性骨折	腰椎间盘突出;高血压病	好转	占恭豪	占恭豪	黄茜茜
1260	C05疼痛科	2023-04-09	2023-04-16	3355116	潘长森	男	79Y	骨质疏松伴有病理性骨折	腰椎间盘突出;脊柱压缩性骨折;高血压病;2型糖尿病;青光眼;特指手术后状态	好转	占恭豪	占恭豪	黄茜茜
1261	C05疼痛科	2023-04-12	2023-04-18	3355814	潘爱英	女	63Y	骨质疏松伴有病理性骨折	脊柱骨折;支气管哮喘，非危重;高血压病;继发性甲状腺功能减退症	好转	占恭豪	占恭豪	黄茜茜
1262	C05疼痛科	2023-03-14	2023-04-18	3355864	金美竹	女	70Y	腰椎间盘突出	高血压病;骨质增生;2型糖尿病;脊柱压缩性骨折	治愈	占恭豪	占恭豪	黄茜茜	腰椎间盘切除伴椎板切除术;神经根管松解术;椎间盘射频消融术;椎管扩大成形术，单开门
1263	C05疼痛科	2023-04-15	2023-04-20	3356014	夏金钗	女	77Y	骨质疏松伴病理性骨折	高血压病;2型糖尿病	治愈	许峰	王佩芳	王佩芳
1264	C05疼痛科	2023-04-15	2023-04-22	3357319	张庆志	男	77Y	骨质疏松伴有病理性骨折	腰椎间盘突出	好转	占恭豪	占恭豪	何伶俐
1265	C05疼痛科	2023-04-16	2023-04-23	3357806	郑小文	女	63Y	骨质疏松伴有病理性骨折	应力性骨折;高血压病	治愈	许峰	王佩芳	王佩芳
1266	C05疼痛科	2023-04-19	2023-04-23	3358150	金长俊	男	77Y	肋骨骨折	心房颤动;高血压病;高脂血症	治愈	许峰	许峰	许峰
1267	C05疼痛科	2023-04-18	2023-04-25	3358695	陈谦弟	女	83Y	骨质疏松伴病理性骨折	特指手术后状态	好转	占恭豪	占恭豪	何伶俐
1268	C05疼痛科	2023-04-22	2023-04-28	3359977	施美香	女	80Y	骨质疏松伴有病理性骨折	高血压病;胸椎骨折	好转	占恭豪	占恭豪	黄茜茜
1269	C05疼痛科	2023-04-27	2023-04-28	3360082	王碎英	女	74Y	骨质疏松伴有病理性骨折	肺部感染;骨折治疗后恢复期;乙肝表面抗原携带者;贫血	治愈	占恭豪	申帮利	申帮利
1270	C05疼痛科	2023-04-25	2023-04-30	3361035	章钦瑚	男	80Y	骨质疏松伴病理性骨折	特指手术后状态;头晕和眩晕;颈椎病	好转	占恭豪	占恭豪	黄茜茜
1271	C05疼痛科	2023-05-02	2023-05-02	3361869	詹美云	女	64Y	骨质疏松伴病理性骨折		好转	许峰	王佩芳	王佩芳
1272	C05疼痛科	2023-04-22	2023-05-09	3364297	娄秀兰	女	82Y	骨质疏松伴病理性骨折	下肢静脉血栓形成;类风湿性关节炎;肺结节;高血压病;2型糖尿病	治愈	占恭豪	占恭豪	黄茜茜
1273	C05疼痛科	2023-05-07	2023-05-10	3364737	吴荣贵	男	56Y	颈椎关节强硬	慢性胃炎;骨质疏松伴有病理性骨折	好转	许峰	王佩芳	王佩芳
1274	C05疼痛科	2023-05-06	2023-05-13	3365818	翁奶儿	女	66Y	骨质疏松伴病理性骨折	下肢动脉粥样硬化	好转	占恭豪	占恭豪	黄茜茜
1275	C05疼痛科	2023-05-09	2023-05-13	3365837	周玉花	女	88Y	骨质疏松伴病理性骨折	膝关节炎;腰椎椎管狭窄;高血压病;颈椎关节强硬	好转	占恭豪	占恭豪	黄茜茜
1276	C05疼痛科	2023-05-14	2023-05-15	3366757	孙冬兰	女	77Y	骨质疏松伴病理性骨折	膝关节炎;腰椎间盘突出;高血压病	好转	占恭豪	占恭豪	黄茜茜
1277	C05疼痛科	2023-05-06	2023-05-15	3366759	王秀华	女	70Y	骨质疏松伴病理性骨折	乳房恶性肿瘤个人史;胆囊切除术后状态;高血压病;腰肌劳损;高尿酸血症;糖尿病;特指手术后状态	好转	占恭豪	占恭豪	黄茜茜
1278	C05疼痛科	2023-05-13	2023-05-16	3367111	葛爱芬	女	66Y	骨质疏松伴病理性骨折	高血压病	好转	占恭豪	占恭豪	黄茜茜
1279	C05疼痛科	2023-05-12	2023-05-16	3367301	潘凤香	女	68Y	骨质疏松伴病理性骨折	高血压病;骨质疏松;肝囊肿	治愈	王向阳	盛孙仁	盛孙仁	腰椎骨折球囊扩张成形术
1280	C05疼痛科	2023-05-13	2023-05-20	3368464	章小花	女	80Y	骨质疏松伴病理性骨折	下肢动脉粥样硬化;腰椎间盘突出;脊柱侧弯;高血压病;颈椎关节强硬	好转	占恭豪	占恭豪	黄茜茜
1281	C05疼痛科	2023-05-16	2023-05-20	3368601	余小根	男	80Y	骨质疏松伴病理性骨折	特指手术后状态;腰椎间盘突出;肺结节病;下肢动脉粥样硬化;肺气肿	好转	占恭豪	占恭豪	黄茜茜
1282	C05疼痛科	2023-05-13	2023-05-20	3368697	卢香弟	女	71Y	腰椎椎管狭窄	高血压;骨质疏松伴有病理性骨折;2型糖尿病	好转	许峰	王佩芳	王佩芳
1283	C05疼痛科	2023-05-20	2023-05-27	3371498	刘笑微	女	62Y	颈椎病	肩胛骨骨折;肋骨骨折;腰椎骨折;胸椎骨折	治愈	占恭豪	占恭豪	黄茜茜	颈椎间盘切除伴椎板切除术;神经根管松解术;椎管扩大成形术，单开门;椎间盘射频消融术
1284	C05疼痛科	2023-05-27	2023-05-31	3373395	翁连英	女	84Y	骨质疏松伴有病理性骨折	高血压	治愈	许峰	王佩芳	王佩芳
1285	C05疼痛科	2023-06-05	2023-06-11	3377585	陈金兰	女	58Y	骨质疏松伴有病理性骨折	应力性骨折	治愈	占恭豪	申帮利	申帮利
1286	C05疼痛科	2023-06-13	2023-06-14	3378913	翁素兰	女	89Y	膀胱恶性肿瘤	肾功能不全;后天性肾囊肿;肾结石;肾盂积水，其他的;腹壁肿物;颈动脉硬化;下肢动脉粥样硬化;高血压;胆囊结石伴胆囊炎;脊椎松解;肿瘤性病理性骨折;脓毒血症;高钾血症;高钙血症;肺部结节	未愈	吴剑	吴剑	孙霜霜
1287	C05疼痛科	2023-06-13	2023-06-20	3381258	陈秀凤	女	75Y	骨质疏松伴有病理性骨折	脊柱骨折;高血压	好转	占恭豪	占恭豪	黄茜茜
1288	C05疼痛科	2023-06-18	2023-06-20	3381622	周院生	男	30Y	肱骨骨折	肝回声不均;蛛网膜下出血;颈椎间盘突出;肺部结节	好转	翁益民	翁益民	项光恒
1289	C05疼痛科	2023-06-17	2023-06-25	3383570	叶爱兰	女	70Y	腰椎间盘突出	肝炎后肝硬化;冠状动脉粥样硬化性心脏病;恶性肿瘤手术后的随诊检查;高血压;骨质疏松伴有病理性骨折	未愈	许峰	王佩芳	王佩芳
1290	C05疼痛科	2023-06-20	2023-06-27	3384384	戴盛华	女	71Y	骨质疏松伴有病理性骨折	脊柱骨折;下肢动脉粥样硬化	好转	占恭豪	占恭豪	黄茜茜
1291	C05疼痛科	2023-06-24	2023-06-28	3384870	陈佩兰	女	78Y	骨质疏松伴有病理性骨折	冠状动脉介入治疗后随诊检查;颅内动脉瘤;高血压;冠状动脉粥样硬化性心脏病	好转	许峰	王佩芳	王佩芳
1292	C05疼痛科	2023-06-24	2023-06-28	3384874	陈民书	男	58Y	神经痛	肋骨骨折;高血压	治愈	许峰	王佩芳	王佩芳	周围神经阻滞术
1293	C05疼痛科	2023-06-24	2023-06-28	3384879	宋茶妹	女	83Y	骨质疏松伴有病理性骨折	高血压;下肢动脉粥样硬化;脊柱骨折	好转	占恭豪	占恭豪	黄茜茜
1294	C05疼痛科	2023-06-24	2023-07-01	3385764	王秋兰	女	78Y	骨质疏松伴有病理性骨折	脊柱骨折;下肢动脉粥样硬化;窦性心动过缓;高血压	治愈	占恭豪	占恭豪	黄茜茜
1295	C05疼痛科	2023-07-02	2023-07-05	3387660	周弟芬	女	45Y	肋骨骨折		好转	许峰	许峰	王佩芳
1296	C05疼痛科	2023-07-01	2023-07-05	3388157	沙光荣	男	67Y	静脉血栓形成	脊柱压缩性骨折;高血压;2型糖尿病	未愈	占恭豪	占恭豪	黄茜茜
1297	C05疼痛科	2023-07-03	2023-07-08	3388913	吕丽雅	女	17Y	取除骨折内固定装置		其他	翁益民	翁益民	项光恒	踝关节内固定装置去除术
1298	C05疼痛科	2023-07-04	2023-07-08	3388942	金冬琴	女	70Y	骨质疏松伴有病理性骨折	脊柱骨折;下肢动脉粥样硬化	治愈	占恭豪	占恭豪	黄茜茜
1299	C05疼痛科	2023-07-01	2023-07-08	3389056	江阿招	女	71Y	骨质疏松伴有病理性骨折	类风湿性关节炎;高血压;窦性心动过缓	治愈	占恭豪	占恭豪	黄茜茜
1300	C05疼痛科	2023-07-02	2023-07-08	3389135	黄金凤	女	63Y	脊柱骨折	高血压;甲状腺功能亢进症;脂肪肝;胆囊结石	好转	占恭豪	占恭豪	黄茜茜
1301	C05疼痛科	2023-06-17	2023-07-09	3389711	孙茶花	女	69Y	骨质疏松伴有病理性骨折		好转	许峰	王佩芳	王佩芳	连续硬膜外阻滞术
1302	C05疼痛科	2023-07-15	2023-07-17	3393416	周洁莲	女	69Y	骨质疏松伴有病理性骨折		好转	占恭豪	占恭豪	黄茜茜
1303	C05疼痛科	2023-07-08	2023-07-19	3394424	吴金棋	男	39Y	髌骨骨折	糖尿病;脂肪肝	治愈	翁益民	翁益民	项光恒	髌骨骨折切开复位张力带钢丝内固定术
1304	C05疼痛科	2023-07-17	2023-07-22	3395587	吴雪连	女	54Y	取除骨折内固定装置	脂肪肝;肝血管瘤;肘关节僵硬;瘢痕	其他	余可和	余可和	王少华2	尺骨内固定装置去除术
1305	C05疼痛科	2023-07-18	2023-07-23	3396205	金来香	女	83Y	骨质疏松伴有病理性骨折	特发性（原发性）高血压;肱骨头缺血性坏死	好转	许峰	王佩芳	王佩芳
1306	C05疼痛科	2023-07-17	2023-07-26	3397364	陈阿美	女	75Y	腰椎间盘突出	特发性（原发性）高血压;骨质疏松伴有病理性骨折;脑卒中后遗症	治愈	许峰	王佩芳	王佩芳	椎间盘射频消融术;椎管扩大成形术，单开门;神经根管松解术;椎间盘镜下后入路腰椎间盘切除术
1307	C05疼痛科	2023-07-13	2023-07-26	3397447	金崇琴	女	66Y	桡骨下端骨折	2型糖尿病;脂肪肝;肝内钙化点;胆囊结石;肾钙化;后天性肾囊肿;特发性（原发性）高血压	治愈	翁益民	翁益民	项光恒	人工桡骨头置换术;桡骨骨折切开复位钢板内固定术
1308	C05疼痛科	2023-08-01	2023-08-05	3401747	陈荷彩	女	65Y	骨质疏松伴有病理性骨折	高血压;糖尿病	好转	占恭豪	占恭豪	黄茜茜
1309	C05疼痛科	2023-07-26	2023-08-05	3401847	徐联贵	男	76Y	骨质疏松伴有病理性骨折	脊柱骨折;高血压;肺部感染	好转	占恭豪	占恭豪	黄茜茜
1310	C05疼痛科	2023-07-30	2023-08-06	3402235	邹立宽	男	64Y	腰椎间盘突出	特发性(原发性)高血压;骨质疏松伴有病理性骨折;腰椎压缩性骨折	治愈	许峰	王佩芳	王佩芳	椎间盘射频消融术;椎管扩大成形术，单开门;神经根管松解术;椎间盘镜下后入路腰椎间盘切除术
1311	C05疼痛科	2023-07-30	2023-08-06	3402236	王腊媚	女	67Y	后天性腰椎滑脱	骨质疏松伴有病理性骨折;特发性(原发性)高血压	好转	许峰	王佩芳	王佩芳	冲击波治疗
1312	C05疼痛科	2023-08-05	2023-08-08	3403238	周爱莲	女	69Y	骨质疏松伴有病理性骨折		好转	许峰	王佩芳	王佩芳
1313	C05疼痛科	2023-07-31	2023-08-12	3404842	陈啊菜	女	77Y	骨质疏松，其他的	脊柱骨折;特发性(原发性)高血压;2型糖尿病	好转	许峰	王佩芳	王佩芳
1314	C05疼痛科	2023-08-07	2023-08-15	3406448	董爱媚	女	85Y	骨质疏松伴有病理性骨折	特发性(原发性)高血压;冠状动脉粥样硬化性心脏病;慢性胃炎;下肢动脉粥样硬化	好转	占恭豪	占恭豪	黄茜茜
1315	C05疼痛科	2023-08-12	2023-08-15	3406566	许崇香	女	81Y	腰椎骨折	椎管狭窄	好转	占恭豪	占恭豪	黄茜茜
1316	C05疼痛科	2023-08-12	2023-08-16	3406972	戴永香	女	82Y	骨质疏松伴有病理性骨折	肺的其他疾患;颈椎间盘突出;腰椎间盘突出;特发性(原发性)高血压;糖尿病;手术后状态，其他特指的	好转	占恭豪	占恭豪	黄茜茜
1317	C05疼痛科	2023-08-16	2023-08-22	3409730	刘爱媚	女	85Y	骨质疏松伴有病理性骨折	特发性(原发性)高血压	好转	占恭豪	占恭豪	黄茜茜
1318	C05疼痛科	2023-08-21	2023-08-26	3411331	陈胜忠	男	38Y	取除骨折内固定装置	脂肪肝;颈淋巴结肿大	其他	翁益民	翁益民	项光恒	跟骨内固定物取出术
1319	C05疼痛科	2023-08-21	2023-08-27	3411759	王爱妹	女	60Y	骨质疏松伴有病理性骨折	椎管狭窄	好转	许峰	吴彬彬	刘世文
1320	C05疼痛科	2023-08-21	2023-08-30	3413173	赖吴玉	女	64Y	肱骨外科颈骨折	臂丛神经损伤;特发性(原发性)高血压;脂肪肝	治愈	翁益民	翁益民	项光恒	肱骨骨折切开复位钢板内固定术
1321	C05疼痛科	2023-09-02	2023-09-05	3415706	苏玉华	女	92Y	骨质疏松伴有病理性骨折	高血压;缺铁性贫血	治愈	占恭豪	申帮利	申帮利
1322	C05疼痛科	2023-08-05	2023-09-06	3416197	高芳柳	女	78Y	腰椎间盘突出	陈旧性肋骨骨折;特发性(原发性)高血压;肾结石;后天性肾囊肿;甲状腺结节;甲状腺术后;乳房纤维囊性乳腺病;下肢动脉粥样硬化;腰椎退行性病变;高血压性肾衰竭;脊椎松解	好转	占恭豪	占恭豪	黄茜茜	椎间盘射频消融术;椎管扩大成形术，单开门;神经根管松解术;椎间盘镜下后入路腰椎间盘切除术
1323	C05疼痛科	2023-09-02	2023-09-09	3417075	黄连凤	女	65Y	骨质疏松伴有病理性骨折	腰椎压缩性骨折;2型糖尿病	好转	占恭豪	占恭豪	黄茜茜
1324	C05疼痛科	2023-09-07	2023-09-10	3417902	罗娟妹	女	58Y	胸椎压缩性骨折	腰椎间盘突出	治愈	占恭豪	申帮利	申帮利
1325	C05疼痛科	2023-09-05	2023-09-16	3419888	吴爱妹	女	74Y	神经痛	冠状动脉粥样硬化性心脏病;骨质疏松伴有病理性骨折	好转	许峰	王佩芳	王佩芳
1326	C05疼痛科	2023-09-07	2023-09-18	3420775	王立平	男	61Y	胫腓骨干骨折	后天性肾囊肿;肾结石	治愈	陈华	孙辽军	蔡乐益	胫骨骨折切开复位钢板内固定术
1327	C05疼痛科	2023-09-16	2023-09-21	3422314	夏美凤	女	74Y	骨质疏松伴有病理性骨折	腰椎骨折L3;高血压;多发性肝囊肿;后天性肾囊肿;下肢动脉粥样硬化;下肢静脉血栓形成	好转	占恭豪	占恭豪	田心毅
1328	C05疼痛科	2023-09-16	2023-09-23	3422844	陈联华	女	73Y	椎管狭窄	后天性腰椎滑脱;胸椎压缩性骨折;高血压;糖尿病	好转	占恭豪	占恭豪	黄茜茜
1329	C05疼痛科	2023-09-18	2023-09-24	3423259	杨世周	男	50Y	髌骨骨折	脂肪肝;肾结石;后天性肾囊肿	治愈	孔建中	陈墨川	陈墨川	股四头肌腱延长术;关节软骨修复术;髌骨骨折切开复位螺钉内固定术
1330	C05疼痛科	2023-09-20	2023-09-26	3424377	郭美仙	女	76Y	腰椎间盘突出	腰椎压缩性骨折;脑梗死后遗症;特发性(原发性)高血压	好转	许峰	王佩芳	王佩芳	神经根管松解术
1331	C05疼痛科	2023-09-24	2023-09-27	3424876	陈阿菊	女	79Y	骨质疏松伴有病理性骨折	高血压;腰椎术后	好转	许峰	吴彬彬	刘世文
1332	C05疼痛科	2023-09-23	2023-09-27	3424885	蔡显弟	男	89Y	骨质疏松伴有病理性骨折	腰椎间盘突出;高血压;痛风;2型糖尿病	好转	许峰	王佩芳	王佩芳
1333	C05疼痛科	2023-09-26	2023-09-30	3426030	吴秀珠	女	69Y	骨质疏松伴有病理性骨折	胆囊切除术后状态	好转	占恭豪	占恭豪	田心毅
1334	C05疼痛科	2023-09-25	2023-09-30	3426322	金美菊	女	62Y	取除骨折内固定装置		其他	翁益民	翁益民	王特	髌骨内固定装置去除术
1335	C05疼痛科	2023-09-29	2023-10-12	3430491	林春香	女	75Y	骨质疏松伴有病理性骨折		好转	占恭豪	占恭豪	黄茜茜	结肠镜检查;胃镜检查
1336	C05疼痛科	2023-10-08	2023-10-15	3431586	李美芽	女	83Y	神经痛	骨质疏松伴有病理性骨折;高血压	好转	许峰	王佩芳	池炳焕
1337	C05疼痛科	2023-10-15	2023-10-18	3433198	徐秋艳	女	49Y	为肿瘤化学治疗疗程	卵巢恶性肿瘤;胸腔继发恶性肿瘤;胸椎骨折;肺诊断性影像异常;肝囊肿	好转	吴剑	张曦	张曦	静脉注射化疗药物
1338	C05疼痛科	2023-10-14	2023-10-21	3434151	林堂翠	女	66Y	骨质疏松伴有病理性骨折	陈旧性胸椎骨折;慢性胃炎;幽门螺旋杆菌感染	好转	许峰	王佩芳	池炳焕
1339	C05疼痛科	2023-10-18	2023-10-21	3434287	郑合梅	女	70Y	骨质疏松伴有病理性骨折		好转	许峰	王佩芳	池炳焕
1340	C05疼痛科	2023-10-21	2023-10-23	3435547	王阿凤	女	75Y	骨质疏松，其他的	脊柱骨折;腰椎间盘突出;高血压;脑梗死	好转	占恭豪	占恭豪	田心毅
1341	C05疼痛科	2023-10-21	2023-10-25	3436162	李红玉	女	82Y	骨质疏松伴有病理性骨折	直肠恶性肿瘤个人史;甲状腺功能减退症;贫血	好转	占恭豪	占恭豪	黄茜茜
1342	C05疼痛科	2023-10-22	2023-10-26	3436617	赵玉翠	女	75Y	骨质疏松伴有病理性骨折	高血压;糖尿病;冠状动脉粥样硬化性心脏病	好转	占恭豪	占恭豪	黄茜茜
1343	C05疼痛科	2023-10-24	2023-10-28	3437429	金彩虹	女	50Y	取除骨折内固定装置		其他	陈华	孙辽军	蔡乐益	髌骨内固定装置去除术
1344	C05疼痛科	2023-10-28	2023-10-31	3438802	杨陈汉	男	55Y	骨质疏松伴有病理性骨折	帕金森病;腰椎退行性病变;胸椎退行性病变;腰椎骨折	未愈	黄其杉	林仲可	朱思品
1345	C05疼痛科	2023-11-02	2023-11-05	3440767	王国松	男	77Y	骨质疏松伴有病理性骨折		好转	占恭豪	占恭豪	黄茜茜
1346	C05疼痛科	2023-10-29	2023-11-05	3440794	梁朱绿	女	73Y	骨质疏松伴有病理性骨折	颈动脉硬化;老年性脑萎缩	好转	许峰	许峰	刘世文
1347	C05疼痛科	2023-10-31	2023-11-05	3440919	蒋金唐	女	64Y	骨质疏松	腰椎术后;肋骨骨折	好转	占恭豪	占恭豪	黄茜茜
1348	C05疼痛科	2023-10-29	2023-11-05	3440922	章启禄	男	53Y	腰椎压缩性骨折		治愈	许峰	许峰	刘世文	为镇痛的椎管麻醉药注射
1349	C05疼痛科	2023-10-26	2023-11-06	3441275	杨元昌	男	32Y	腕骨骨折	掌骨骨折;桡骨茎突骨折;手舟\[舟状\]骨骨折;大多角骨骨折;尺骨茎突骨折	治愈	余可和	胡炜	胡炜	腕关节镜下舟骨骨折固定术;尺骨骨折切开复位钢针内固定术;掌骨骨折切开复位钢针内固定术;桡骨骨折切开复位钢板内固定术
1350	C05疼痛科	2023-10-24	2023-11-07	3441746	吴燕奶	女	62Y	胫腓骨下端骨折	肝回声不均;甲状腺结节	治愈	陈龙	应晓洲	应晓洲	胫骨骨折切开复位钢板内固定术;腓骨骨折切开复位螺钉内固定术;胫骨人工骨植骨术
1351	C05疼痛科	2023-11-11	2023-11-14	3444804	徐秋艳	女	49Y	为肿瘤化学治疗疗程	卵巢恶性肿瘤;胸腔继发恶性肿瘤;胸椎骨折;肺诊断性影像异常;肝囊肿	好转	吴剑	张曦	张曦	静脉注射化疗药物
1352	C05疼痛科	2023-11-11	2023-11-14	3444978	蔡福钿	男	54Y	肺恶性肿瘤	骨继发恶性肿瘤;肿瘤性病理性骨折	好转	占恭豪	占恭豪	黄茜茜
1353	C05疼痛科	2023-11-07	2023-11-18	3446362	胡丐爱	女	56Y	椎管狭窄	腰椎压缩性骨折	好转	占恭豪	占恭豪	黄茜茜	椎间盘镜下后入路腰椎间盘切除术;神经根管松解术;椎管扩大成形术，单开门;椎间盘射频消融术
1354	C05疼痛科	2023-11-21	2023-11-23	3448794	张纯福	男	66Y	骨质疏松伴有病理性骨折	腰椎间盘突出;心房颤动;冠状动脉粥样硬化性心脏病;胆囊切除术后状态;高血压;高脂血症;肾结石	好转	占恭豪	占恭豪	黄茜茜
1355	C05疼痛科	2023-11-07	2023-11-25	3449503	叶文文	女	76Y	骨质疏松伴有病理性骨折		好转	占恭豪	占恭豪	黄茜茜	连续硬膜外阻滞术;为镇痛的椎管麻醉药注射
1356	C05疼痛科	2023-11-15	2023-11-25	3449838	张显珠	女	59Y	乳腺恶性肿瘤	心功能不全;胸腔积液;肺部感染;低蛋白血症;中度贫血;2型糖尿病;胸椎压缩性骨折	好转	陈文俊	陈文俊		胸腔穿刺术;胸腔穿刺术
1357	C05疼痛科	2023-11-15	2023-11-26	3450255	李芬	女	51Y	桡骨下端骨折	尺骨茎突骨折;腰椎间盘突出;颈椎间盘变性，其他的;颈椎间盘突出	好转	翁益民	翁益民	王特	桡骨骨折切开复位钢板内固定术;关节软骨修复术;桡骨人工骨植骨术
1358	C05疼痛科	2023-11-26	2023-11-28	3451016	宋德生	男	84Y	骨质疏松伴有病理性骨折		好转	许峰	王佩芳	刘世文
1359	C05疼痛科	2023-11-25	2023-11-28	3451019	何巧钗	女	81Y	骨质疏松伴有病理性骨折	单侧或未特指的腹股沟疝，不伴有梗阻或坏疽	好转	许峰	王佩芳	刘世文
1360	C05疼痛科	2023-11-25	2023-11-28	3451116	方才娇	女	69Y	骨质疏松伴有病理性骨折	高血压;2型糖尿病	好转	占恭豪	占恭豪	黄茜茜
1361	C05疼痛科	2023-11-25	2023-11-29	3451443	陈梅聪	女	59Y	骨质疏松伴有病理性骨折	足痛	好转	占恭豪	占恭豪	黄茜茜
1362	C05疼痛科	2023-11-26	2023-11-29	3451879	李凤丹	女	68Y	骨质疏松伴有病理性骨折	椎间盘移位，其他特指的;抑郁状态;慢性胃炎	好转	许峰	许峰	刘世文
1363	C05疼痛科	2023-11-25	2023-12-02	3452677	丁珠凤	女	77Y	胸椎压缩性骨折	骨质疏松;腰椎退行性病变;胸椎退行性病变;脊柱侧弯;高血压;下肢静脉血栓形成;后天性肾囊肿;胆管扩张;慢性细支气管炎	治愈	田乃锋	倪文飞	万峻莱	胸椎骨折球囊扩张成形术
1364	C05疼痛科	2023-11-20	2023-12-02	3452715	陈一梅	女	50Y	三踝骨折	乳腺术后;甲状腺术后;心功能不全;肝回声不均	好转	翁益民	翁益民	王特	踝关节骨折切开复位钢板内固定术
1365	C05疼痛科	2023-09-23	2023-12-04	3453755	林志翔	男	67Y	放射治疗疗程	为肿瘤化学治疗疗程;食管恶性肿瘤;肺栓塞;静脉血栓形成;粒细胞缺乏;肺部感染;后天性肾囊肿;肝囊肿;陈旧性肋骨骨折;腰椎间盘突出	好转	吴剑	吴剑	周盈盈2	静脉注射化疗药物;静脉注射化疗药物;静脉注射化疗药物;静脉注射化疗药物;静脉注射化疗药物;静脉注射化疗药物
1366	C05疼痛科	2023-11-28	2023-12-09	3455712	杨秀梅	女	65Y	腰椎间盘突出	肩胛骨骨折;肩袖损伤	治愈	许峰	王佩芳	刘世文	椎间盘镜下后入路腰椎间盘切除术;神经根管松解术;椎管扩大成形术，单开门;椎间盘射频消融术
1367	C05疼痛科	2023-12-09	2023-12-16	3458558	黄菊花	女	77Y	骨质疏松伴有病理性骨折	胸椎压缩性骨折	好转	占恭豪	占恭豪	黄茜茜	脊神经根阻滞术
1368	C05疼痛科	2023-12-08	2023-12-16	3458569	谢冬岳	女	63Y	三踝骨折	踝关节脱位;脂肪肝;胆囊结石;胆囊息肉;高血压;IgA肾病;手术后随诊检查	治愈	孔建中	胡炜	陈墨川	踝关节骨折切开复位钢板内固定术;关节软骨修复术;踝关节修补术
1369	C05疼痛科	2023-12-06	2023-12-20	3460499	金玉燕	女	71Y	肱骨近端骨折	肩袖损伤;2型糖尿病;脂肪肝;胆囊结石	好转	翁益民	翁益民	王特	肱骨骨折切开复位钢板内固定术
1370	C05疼痛科	2023-12-13	2023-12-21	3461263	林志翔	男	68Y	为肿瘤化学治疗疗程	食管恶性肿瘤;软组织感染;肺栓塞;肺部感染;后天性肾囊肿;肝囊肿;肋骨骨折;腰椎间盘突出	好转	吴剑	吴剑	周盈盈2	静脉注射化疗药物
1371	C05疼痛科	2023-12-21	2023-12-24	3462313	李龙英	女	65Y	骨质疏松伴有病理性骨折	颈椎病;特发性(原发性)高血压	好转	占恭豪	占恭豪	黄茜茜
1372	C05疼痛科	2023-12-17	2023-12-25	3462611	屈秀清	女	66Y	骨质疏松伴有病理性骨折	乳腺恶性肿瘤;高血压	好转	许峰	吴彬彬	刘世文
1373	C05疼痛科	2023-12-23	2023-12-28	3464254	朱岩花	女	82Y	骨质疏松伴有病理性骨折	高血压	好转	占恭豪	占恭豪	黄茜茜
1374	C05疼痛科	2023-12-26	2023-12-29	3464431	柯龙凤	女	70Y	骨质疏松伴有病理性骨折	直肠肿物	好转	占恭豪	占恭豪	黄茜茜
1375	C06肿瘤放化疗、神经康复	2022-12-20	2023-01-17	3320294	张毅	男	62Y	脑出血	偏瘫;构音困难;吞咽困难;轻度认知障碍;精神障碍;手关节僵硬;涉及使用特指康复操作医疗;高血压病;颅骨骨折;肺大泡;肺部感染	好转	刘宝华	商萍	吕德钊
1376	C06肿瘤放化疗、神经康复	2023-01-07	2023-01-23	3322870	吴秋霞	女	69Y	脑出血	睡眠障碍;运动障碍;异常步态和移动;涉及使用特指康复操作医疗;应力性骨折;高血压病;抑郁症	好转	刘宝华	商萍	胡晓晓
1377	C06肿瘤放化疗、神经康复	2023-01-09	2023-01-30	3325860	林毅	男	58Y	脑干挫伤	创伤性蛛网膜下腔出血;顶骨骨折;弥漫性轴索损伤;头皮血肿;运动障碍;膝关节僵硬;轻度认知障碍;由于活动能力降低而需要帮助;环性心境人格;进食障碍;累及神经和肌肉骨骼系统症状和体征;髌骨半脱位;腕和手损伤;肺部感染;心律失常;房性早搏	好转	刘宝华	商萍	覃燕青
1378	C06肿瘤放化疗、神经康复	2022-12-06	2023-02-02	3327683	黄洁	女	55Y	创伤性蛛网膜下腔出血	创伤性心包积血;心脏特指损伤;创伤性血气胸;肺挫伤;胸部损伤;骶骨骨折;髋臼骨折;多发性肋骨骨折;骨盆骨折;腰骶神经根损伤;胫腓骨下端骨折;关节僵硬;下肢静脉血栓形成;亚临床甲状腺功能减退症;肺部感染;泌尿道感染;耻骨骨折;失血性休克	好转	刘宝华	商萍	覃燕青	心包穿刺术;胸腔闭式引流术;髂内动脉栓塞术;关节软骨修复术;胫骨植骨术;髂骨取骨术;胫骨骨折切开复位钢板内固定术;水泥间隔物置入术;踝关节融合术;踝关节骨折切开复位钢板内固定术;骨盆骨折切开复位螺钉内固定术;下腔静脉滤器置入术;股静脉穿刺术
1379	C06肿瘤放化疗、神经康复	2023-01-08	2023-02-02	3327881	陈余庄	男	68Y	恶性肿瘤的维持性化疗	肺继发恶性肿瘤;肝继发恶性肿瘤;骨继发恶性肿瘤;肾结石;胆囊结石;乙状结肠恶性肿瘤;前列腺钙化灶;慢性胃炎;锁骨骨折;肩胛骨骨折;后天性肾囊肿	好转	吴剑	吴剑	218358
1380	C06肿瘤放化疗、神经康复	2022-10-12	2023-02-15	3295619	刘建国	男	52Y	颈椎骨折	肺挫伤;高血压病;运动障碍;由于活动能力降低而需要帮助;颈部脊髓特指损伤;肺部感染;泌尿道感染;多发性肋骨骨折;肩胛骨骨折;锁骨骨折;下肢静脉血栓形成;肝功能异常;低钠血症;肺不张;皮肤裂伤;胸腔积液	好转	刘宝华	商萍	吕德钊	颈椎植骨术;支气管镜下肺泡灌洗术（BAL）;暂时性气管切开术;颈椎脱位切开复位内固定术
1381	C06肿瘤放化疗、神经康复	2023-01-28	2023-03-01	3336576	王志友	男	56Y	颅脑外伤性意识障碍	肋骨骨折;肺部感染;胸腔积液;癫痫;硬脑膜下积液;由于活动能力降低而需要帮助;神经源性膀胱;颅内损伤;言语障碍;吞咽困难;轻度认知障碍;气管造口状态;锁骨骨折;肩胛骨骨折;运动障碍;神经源性肠;手术后恢复期;肠穿孔(非创伤性)	好转	刘宝华	商萍	胡晓晓	超声引导下胸腔穿刺术
1382	C06肿瘤放化疗、神经康复	2023-02-10	2023-03-05	3338478	黄洁	女	55Y	骨盆骨折	乙型肝炎小三阳;手术后伤口愈合不良;腰骶部脊髓神经丛损伤;下肢静脉血栓形成;肝功能异常;创伤性心包积血;创伤性血气胸;肺挫伤;亚临床甲状腺功能减退症;运动障碍;骨折治疗后恢复期;髋关节僵硬;开放性胸部损伤;多发性肋骨骨折;心脏特指损伤	好转	刘宝华	商萍	覃燕青
1383	C06肿瘤放化疗、神经康复	2023-03-05	2023-03-12	3341001	陈进喜	男	72Y	腔隙性脑梗死	颈动脉硬化;锁骨下动脉粥样硬化;骨质疏松伴病理性骨折;腰椎间盘突出;创伤性脊椎病;高血压病;2型糖尿病;前列腺结石;前列腺增生;糜烂性胃炎;肺气肿;下肢静脉曲张;甲状腺结节;肺结节	好转	刘宝华	商萍	覃燕青	胃镜检查;结肠镜检查
1384	C06肿瘤放化疗、神经康复	2023-02-21	2023-03-18	3343800	张毅	男	62Y	脑出血	低钠血症;手关节僵硬;涉及使用康复操作的医疗;言语障碍;吞咽困难;肌张力障碍;轻度认知障碍;运动障碍;颅骨骨折;肺部感染;肺大泡;精神障碍	好转	刘宝华	商萍	覃燕青	肉毒素注射
1385	C06肿瘤放化疗、神经康复	2023-03-12	2023-03-26	3346222	郑爱兰	女	63Y	不安腿综合征	膝关节积液;睡眠障碍;脂肪肝;结肠炎;糜烂性胃炎;下肢静脉曲张;下肢关节和韧带脱位、扭伤和劳损;颈动脉硬化;锁骨下动脉粥样硬化;下肢动脉粥样硬化;慢性上颌窦炎;应力性骨折;腰椎间盘突出;颈椎间盘突出	好转	刘宝华	商萍	覃燕青	胃镜检查;内镜下结肠病损切除术
1386	C06肿瘤放化疗、神经康复	2023-03-12	2023-03-26	3346668	连素芬	女	96Y	脑梗死	涉及使用康复操作的医疗;陈旧性股骨骨折;由于活动能力降低而需要帮助;神经源性膀胱;言语障碍;特指异常步态和移动;吞咽困难;颈动脉硬化;下肢动脉硬化闭塞症;颈动脉狭窄;轻度认知障碍;关节僵硬;心房颤动;运动障碍;肝功能不全;肺部感染	好转	刘宝华	商萍	覃燕青
1387	C06肿瘤放化疗、神经康复	2023-02-26	2023-03-28	3347719	郑德右	男	51Y	脑出血	由于活动能力降低而需要帮助;颅内损伤;言语障碍;累及神经和肌肉骨骼系统症状和体征;吞咽困难;脑动脉粥样硬化;轻度认知障碍;胆囊结石;硬膜外血肿;运动障碍;2型糖尿病;头皮血肿;肋骨骨折;膝关节僵硬;泌尿道感染;脂肪肝;肺部感染;胸腔积液	好转	刘宝华	商萍	胡晓晓
1388	C06肿瘤放化疗、神经康复	2023-03-25	2023-03-28	3347843	戴本存	男	41Y	颈椎间盘突出	特指手术后状态;陈旧性踝关节骨折;脂肪肝;高脂血症;慢性上颌窦炎;高血压病;高尿酸血症;肾错构瘤	好转	刘宝华	商萍	胡晓晓
1389	C06肿瘤放化疗、神经康复	2023-03-29	2023-04-02	3349526	徐秋艳	女	48Y	恶性肿瘤维持性化学治疗	胸腔继发恶性肿瘤;肺结节病;胸椎骨折;肝囊肿;卵巢恶性肿瘤	好转	吴剑	吴剑	吴聪聪
1390	C06肿瘤放化疗、神经康复	2023-03-15	2023-04-13	3353889	杨崇禧	男	85Y	肱骨外科颈骨折	甲状腺结节;轻度认知障碍;硬脑膜下积液;肺大泡;肺部感染;肺肿物;肾衰竭;膝关节僵硬;肝功能异常;真菌感染;2型糖尿病;由于活动能力降低而需要帮助;吞咽困难;静脉栓塞和血栓形成	好转	刘宝华	商萍	胡晓晓
1391	C06肿瘤放化疗、神经康复	2023-03-28	2023-04-16	3355034	胡淑眉	女	98Y	脑梗死	轻度认知障碍;高血压病;运动障碍;特指糖尿病伴肾并发症;2型糖尿病;股骨骨折;阵发性室上性心动过速;青光眼;由于活动能力降低而需要帮助;后天性肾囊肿;言语障碍;吞咽困难;下肢动脉粥样硬化;腘动脉狭窄	好转	刘宝华	商萍	覃燕青
1392	C06肿瘤放化疗、神经康复	2023-03-16	2023-04-17	3355415	陈瑞珠	女	93Y	股骨颈骨折	老年性痴呆;肺大泡;胸腔积液;肺部感染;膝关节僵硬;呼吸衰竭;运动障碍;高血压病;慢性阻塞性肺病伴急性加重;由于活动能力降低而需要帮助	好转	刘宝华	商萍	胡晓晓	髋关节滑膜切除术;人工股骨头置换术
1393	C06肿瘤放化疗、神经康复	2023-03-26	2023-04-23	3357798	王志友	男	56Y	颅内损伤伴长时间昏迷	由于活动能力降低而需要帮助;神经源性膀胱;言语障碍;吞咽困难;脑室分流后低颅压;轻度认知障碍;手术后恢复期;神经源性肠;运动障碍;肩胛骨骨折;锁骨骨折;肋骨骨折;肺部感染;胸腔积液;癫痫;硬脑膜下积液;脑外伤后综合征;特指手术后状态	未愈	刘宝华	商萍	覃燕青
1394	C06肿瘤放化疗、神经康复	2023-04-24	2023-04-26	3359522	徐秋艳	女	48Y	恶性肿瘤的维持性化疗	胸腔继发恶性肿瘤;胸椎骨折;肝囊肿;卵巢恶性肿瘤;肺结节	好转	吴剑	吴剑	218358
1395	C06肿瘤放化疗、神经康复	2023-04-29	2023-04-30	3361348	周祝娒	男	67Y	消化道出血	呼吸心跳骤停;肝继发恶性肿瘤;后天性肾囊肿;呼吸道感染;陈旧性肋骨骨折	未愈	陈文俊	张曦	张曦
1396	C06肿瘤放化疗、神经康复	2023-04-26	2023-05-09	3364290	杨碎娒	男	72Y	贲门恶性肿瘤	陈旧性股骨骨折;后天性肾囊肿;脑动脉瘤;重度贫血;腔隙性脑梗死;大脑皮质出血;二尖瓣脱垂;肝囊肿;残胃炎;败血症	好转	吴剑	吴剑	吴聪聪	胃镜检查
1397	C06肿瘤放化疗、神经康复	2023-04-07	2023-05-10	3364513	叶兴鸿	男	88Y	硬膜下出血	支气管扩张伴感染;髂骨骨折;腰椎退行性病变;肩关节僵硬;腔隙性脑梗死;高血压病;头皮血肿;开放性脑挫伤;下肢动脉粥样硬化;肾结石;后天性肾囊肿;由于活动能力降低而需要帮助;脂肪瘤;贫血;蛛网膜下腔出血;肺气肿;肺大泡;膀胱结石;前列腺增生	好转	刘宝华	商萍	赵芸
1398	C06肿瘤放化疗、神经康复	2023-05-16	2023-05-20	3368544	徐秋艳	女	48Y	恶性肿瘤的维持性化疗	胸椎骨折;肝囊肿;卵巢恶性肿瘤;肺结节	好转	吴剑	吴剑	孙霜霜
1399	C06肿瘤放化疗、神经康复	2023-04-24	2023-05-22	3369526	胡碎玉	女	81Y	脑梗死	由于活动能力降低而需要帮助;后天性肾囊肿;颈动脉硬化;脑动脉狭窄;进食障碍;高脂血症;股骨粗隆间骨折;膝关节僵硬;脂肪肝;冠状动脉粥样硬化性心脏病;贫血;运动障碍	好转	刘宝华	商萍	胡晓晓
1400	C06肿瘤放化疗、神经康复	2023-05-10	2023-06-04	3368439	王樟树	男	78Y	肺部感染	胆囊结石;股骨颈骨折;前列腺增生;肝囊肿;后天性肾囊肿;脑出血后遗症;脑梗死后遗症;动脉粥样硬化;帕金森病	好转	刘宝华	商萍	金翩翩
1401	C06肿瘤放化疗、神经康复	2023-04-17	2023-06-04	3374646	董金梅	女	66Y	髋关节僵硬	吞咽困难;下肢动脉粥样硬化;脑梗死个人史;低钾血症;偏瘫;肺部感染;膝关节僵硬;胸椎骨折;肋骨骨折;2型糖尿病;运动障碍;腔隙性脑梗死;急性胃肠炎;骨折治疗后恢复期;腰椎间盘突出;抑郁状态;特定性运动功能发育障碍;言语障碍	好转	刘宝华	商萍	胡晓晓
1402	C06肿瘤放化疗、神经康复	2023-05-15	2023-06-13	3378214	陈金妹	女	76Y	脑出血	高血压病;运动障碍;骨折治疗后恢复期;轻度认知障碍;累及神经和肌肉骨骼系统症状和体征;言语障碍;慢性肾脏病5期;由于活动能力降低而需要帮助;肩手综合征;冠状动脉粥样硬化性心脏病;肺部感染;膝关节僵硬;2型糖尿病;轻度贫血	好转	刘宝华	商萍	胡晓晓
1403	C06肿瘤放化疗、神经康复	2023-06-13	2023-07-09	3389628	陈金妹	女	76Y	脑内出血	高血压;2型糖尿病;冠状动脉粥样硬化性心脏病;陈旧性股骨骨折;慢性肾功能不全尿毒症期;肾性贫血;运动障碍;由于活动能力降低而需要帮助;膝关节僵硬;肩手综合征;言语障碍;轻度认知障碍;特定性运动功能发育障碍;肺部感染	好转	刘宝华	商萍	胡晓晓
1404	C06肿瘤放化疗、神经康复	2023-07-09	2023-07-14	3391944	陈金妹	女	76Y	脑内出血	言语障碍;轻度认知障碍;特定性运动功能发育障碍;肺部感染;特发性（原发性）高血压;冠状动脉粥样硬化性心脏病;2型糖尿病;慢性肾功能不全;慢性肾功能不全尿毒症期;肾性贫血;骨折治疗后恢复期;运动障碍;累及神经和肌肉骨骼系统症状和体征	好转	刘宝华	商萍	胡晓晓
1405	C06肿瘤放化疗、神经康复	2023-07-09	2023-07-24	3396444	黄志花	女	65Y	放射治疗疗程	恶性肿瘤靶向治疗;胃间质细胞瘤;颈动脉硬化;下肢动脉粥样硬化;慢性龈炎;淋巴结继发恶性肿瘤;骨折治疗后恢复期;下肢静脉肌间血栓形成	好转	陈文俊	陈文俊	陈文俊
1406	C06肿瘤放化疗、神经康复	2023-07-01	2023-07-27	3397859	徐冬花	女	93Y	脑梗死	肝肿物;胰腺肿物;特发性（原发性）高血压;肺部结节;肾挛缩;后天性肾囊肿;陈旧性肋骨骨折;肺部感染;呼吸衰竭;胸腔积液;食管恶性肿瘤	好转	刘宝华	商萍	吕德钊
1407	C06肿瘤放化疗、神经康复	2023-07-31	2023-07-31	3399875	孙胜泽	男	28Y	放射治疗疗程	骨折术后;关节周围异位骨化;肘关节僵硬	好转	陈文俊	张曦	李平平
1408	C06肿瘤放化疗、神经康复	2023-06-25	2023-08-02	3400529	陈如林	男	50Y	为肿瘤化学治疗疗程	慢性龈炎;脓毒血症;直肠恶性肿瘤;肺继发恶性肿瘤;肝继发恶性肿瘤;胸椎骨折;特发性(原发性)高血压;后天性肾囊肿	好转	陈文俊	陈文俊	219149	静脉注射化疗药物;经皮椎体球囊扩张成形术
1409	C06肿瘤放化疗、神经康复	2023-07-24	2023-08-06	3402212	林培花	女	72Y	乳腺恶性肿瘤	椎间盘突出;特发性(原发性)高血压;高脂血症;心房过早除极;房性心动过速;脂肪肝;骨继发恶性肿瘤;锁骨下动脉粥样硬化;2型糖尿病;病理性骨折，不可归类在他处者	好转	陈文俊	张曦	张曦
1410	C06肿瘤放化疗、神经康复	2023-08-08	2023-08-15	3406388	包柏花	女	61Y	跖骨骨折	脂肪肝;骨质疏松，其他的;膝内侧半月板撕裂;膝关节退行性病变;腰椎间盘突出;特发性(原发性)高血压;2型糖尿病	好转	刘宝华	商萍	金翩翩
1411	C06肿瘤放化疗、神经康复	2023-08-14	2023-08-16	3407191	沈强华	男	54Y	肺恶性肿瘤	骨继发恶性肿瘤;病理性骨折，不可归类在他处者;肺的其他疾患;肺气肿;慢性乙型病毒性肝炎;胆囊腺肌症;后天性肾囊肿	好转	吴剑	吴剑	林瑞芳
1412	C06肿瘤放化疗、神经康复	2023-08-13	2023-08-18	3407777	陈金妹	女	76Y	运动障碍	肩手综合征;肩关节半脱位;言语障碍;轻度认知障碍;由于活动能力降低而需要帮助;肺部感染;特发性(原发性)高血压;冠状动脉粥样硬化性心脏病;2型糖尿病;慢性肾功能不全;慢性肾功能不全尿毒症期;肾性贫血;陈旧性股骨骨折;脑出血后遗症	好转	刘宝华	商萍	胡晓晓
1413	C06肿瘤放化疗、神经康复	2023-07-06	2023-08-30	3413087	蒋德昌	男	54Y	创伤性蛛网膜下出血	涉及使用其他康复操作的医疗;肝功能检查的异常结果;胸腔积液;肺部感染;枕骨骨折;脑挫伤;运动障碍;轻度认知障碍;言语障碍;进食障碍;由于活动能力降低而需要帮助;头皮挫伤;创伤性硬膜下出血	好转	刘宝华	商萍	戴威
1414	C06肿瘤放化疗、神经康复	2023-08-15	2023-09-02	3414543	夏克管	男	53Y	脑外伤后综合征	胸腔积液;肝功能检查的异常结果;后天性肾囊肿;肾结石;下肢动脉粥样硬化;冈上肌肌腱损伤;胫骨下端骨折;内踝骨折;涉及使用其他康复操作的医疗;蛛网膜下出血;创伤性脑损伤;肌腱和肌肉损伤;运动障碍;由于活动能力降低而需要帮助;脑血管畸形	好转	刘宝华	商萍	黄世园
1415	C06肿瘤放化疗、神经康复	2023-09-03	2023-09-17	3420568	卓高建	男	51Y	缺氧缺血性脑病	言语障碍;进食障碍;轻度认知障碍;冠状动脉粥样硬化性心脏病;冠状动脉痉挛;急性心肌梗死;心脏停搏;恢复期，其他治疗后的;肋骨多处骨折;具有心脏起搏器;帕金森综合征;器质性精神障碍;甲状腺结节;慢性喉炎;双侧不完全声带麻痹	好转	刘宝华	商萍	胡晓晓
1416	C06肿瘤放化疗、神经康复	2023-08-23	2023-09-23	3422650	王贤良	男	65Y	运动障碍	特发性(原发性)高血压;由于活动能力降低而需要帮助;肺部感染;胸腔积液;涉及使用康复操作的医疗;肋骨骨折;桡骨远端骨折;胫骨平台骨折;髌骨骨折;四头肌和肌腱损伤;下肢皮肤套脱伤;气胸;多发性脑梗死;下肢动脉粥样硬化;主动脉的动脉粥样硬化	好转	刘宝华	商萍	黄世园	低频脉冲电治疗;针灸;运动训练
1417	C06肿瘤放化疗、神经康复	2023-09-17	2023-09-24	3423621	沈强华	男	54Y	为肿瘤化学治疗疗程	慢性乙型病毒性肝炎;肺气肿;后天性肾囊肿;骨继发恶性肿瘤;病理性骨折，不可归类在他处者;肺恶性肿瘤;慢性龈炎	好转	吴剑	吴剑	吴聪聪	静脉注射化疗药物
1418	C06肿瘤放化疗、神经康复	2023-09-05	2023-09-26	3424200	苏华忠	男	78Y	运动障碍	额骨骨折;眶骨骨折;颧骨骨折;耻骨骨折;腰椎骨折L3;创伤性脑损伤;下肢动脉粥样硬化;肺气肿;肺部感染;胸腔积液;眼损伤;结膜出血;特定性运动功能发育障碍;轻度认知障碍;由于活动能力降低而需要帮助;创伤性蛛网膜下腔出血;硬脑膜下积液	好转	刘宝华	商萍	胡晓晓	低频脉冲电治疗;作业疗法;运动训练;针灸;行走和步态训练;冲击波治疗
1419	C06肿瘤放化疗、神经康复	2023-09-23	2023-09-26	3424577	徐秋艳	女	48Y	为肿瘤化学治疗疗程	卵巢恶性肿瘤;骨折治疗后恢复期;胸腔继发恶性肿瘤;肝囊肿;肺诊断性影像异常	好转	吴剑	吴剑	吴聪聪	静脉注射化疗药物
1420	C06肿瘤放化疗、神经康复	2023-09-30	2023-09-30	3426687	沈强华	男	54Y	放射治疗疗程	肺恶性肿瘤;慢性龈炎;慢性乙型病毒性肝炎;病理性骨折，不可归类在他处者;胆囊腺肌症;后天性肾囊肿;骨继发恶性肿瘤;肺气肿	好转	吴剑	吴剑	林瑞芳
1421	C06肿瘤放化疗、神经康复	2023-08-22	2023-10-09	3428945	蒋洪福	男	83Y	肺恶性肿瘤	病理性骨折，不可归类在他处者;胸腔积液;下肢动脉粥样硬化;腹主动脉粥样硬化;呼吸衰竭;骨继发恶性肿瘤;阻塞性肺炎;心房颤动;颈动脉硬化;淋巴结继发恶性肿瘤;肺栓塞	未愈	陈文俊	朱宝玲	周盈盈2	内镜下鼻腔粘连松解术
1422	C06肿瘤放化疗、神经康复	2023-09-01	2023-10-11	3429367	夏祖良	男	61Y	硬膜下血肿	肺部感染;消化道出血;低钾血症;脂肪肝;静脉血栓形成;上肢浅表损伤;涉及使用康复操作的医疗;多发性大脑挫裂伤;运动障碍;特定性运动功能发育障碍;轻度认知障碍;言语障碍;进食障碍;硬脑膜下积液;创伤性蛛网膜下腔出血;交通性脑积水;肋骨骨折	好转	刘宝华	商萍	胡晓晓	开颅探查术;颅骨去骨瓣减压术;日常生活动作训练;语言障碍训练
1423	C06肿瘤放化疗、神经康复	2023-09-18	2023-10-15	3431485	杨红妹	女	69Y	运动障碍	轻度认知障碍;特定性运动功能发育障碍;上呼吸道感染;泌尿道感染;硬膜下血肿;脑挫伤;蛛网膜下出血;顶骨骨折;脑外伤后遗症;膝关节僵硬;皮下血肿;胸腔积液;脊椎松解;后天性肾囊肿;肌腱和肌肉损伤;涉及使用其他康复操作的医疗;言语障碍	好转	刘宝华	商萍	覃燕青	作业疗法;电动起立床训练;物理疗法;手功能评估;语言障碍训练;针灸;日常生活动作训练
1424	C06肿瘤放化疗、神经康复	2023-10-12	2023-10-22	3434650	陈奇	男	60Y	运动障碍	特发性(原发性)高血压;肺部感染;胸腔积液;肺诊断性影像异常;脂肪肝;肝功能不全;后天性肾囊肿;多发性脑梗死;硬脑膜下积液;老年性脑萎缩;心功能不全;肋骨骨折;低钠血症;脑内出血;言语障碍;进食障碍;环性心境人格	好转	刘宝华	商萍	吕德钊	电动起立床训练;作业疗法;低频脉冲电治疗;日常生活动作训练;针灸;运动训练
1425	C06肿瘤放化疗、神经康复	2023-10-29	2023-11-06	3441133	郑进达	男	62Y	运动障碍	言语障碍;特定性运动功能发育障碍;蛛网膜下出血;2型糖尿病;2型糖尿病性视网膜病变;玻璃体切除术后视网膜脱离;特发性(原发性)高血压;颈椎间盘突出;脂肪肝;胆囊结石;股骨骨折;胫骨平台骨折;股骨骨折;低钾血症;骨质疏松;涉及使用康复操作的医疗	好转	刘宝华	商萍	吕德钊	物理疗法;脑动脉造影术;日常生活动作训练;语言障碍训练;针灸;低频脉冲电治疗
1426	C06肿瘤放化疗、神经康复	2023-11-07	2023-11-12	3443988	麻伟英	女	81Y	运动障碍	行走困难;由于活动能力降低而需要帮助;骨折治疗后恢复期;桡骨骨折;肱骨骨折;肩袖损伤;桡骨骨折;髋关节置换术后;特发性(原发性)高血压;2型糖尿病;脂肪肝;后天性肾囊肿;良性阵发性位置性眩晕;多发性脑梗死;老年性脑萎缩;涉及使用康复操作的医疗	好转	刘宝华	商萍	吕德钊	针灸;运动训练;低频脉冲电治疗;运动训练
1427	C06肿瘤放化疗、神经康复	2023-10-22	2023-11-13	3444317	章小乃	女	83Y	进食障碍	言语障碍;特定性运动功能发育障碍;多发性脑梗死;中枢神经系统脱髓鞘病;主动脉弓粥样硬化;支气管扩张(症);陈旧性肺结核;肺诊断性影像异常;胸椎退行性病变;腰椎骨折;慢性咽炎;颈动脉硬化;下肢动脉粥样硬化;锁骨下动脉粥样硬化;涉及使用康复操作的医疗	好转	刘宝华	商萍	胡晓晓	日常生活动作训练;语言障碍训练;针灸
1428	C06肿瘤放化疗、神经康复	2023-10-15	2023-11-15	3445267	杨红妹	女	69Y	运动障碍	脑外伤后综合征;膝关节僵硬;由于活动能力降低而需要帮助;行走困难;环性心境人格;硬膜下血肿;创伤性脑损伤;骨质疏松;后天性肾囊肿;带状疱疹不伴有并发症;无症状性菌尿;肺诊断性影像异常;骨折治疗后恢复期;皮疹;涉及使用康复操作的医疗	好转	刘宝华	商萍	覃燕青	物理疗法;作业疗法;针灸;手功能评估;其他控制气压和空气成分的疗法;关节松动法
1429	C06肿瘤放化疗、神经康复	2023-11-06	2023-11-28	3450927	杨冉曦	男	11Y	创伤性蛛网膜下腔出血	脑挫伤;颅底骨折;头皮血肿;硬膜下血肿;胫骨骨折;手术后状态，其他特指的;肺部感染;涉及使用康复操作的医疗	治愈	刘宝华	商萍	黄世园	物理疗法
1430	C06肿瘤放化疗、神经康复	2023-12-04	2023-12-06	3454846	徐秋艳	女	49Y	为肿瘤化学治疗疗程	卵巢恶性肿瘤;胸腔继发恶性肿瘤;胸椎骨折;肺诊断性影像异常;肝囊肿	好转	吴剑	吴剑	周盈盈2	静脉注射化疗药物
1431	C06肿瘤放化疗、神经康复	2023-11-19	2023-12-10	3456357	高珍云	女	67Y	运动障碍	膝关节僵硬;累及神经和肌肉骨骼系统症状和体征;特定性运动功能发育障碍;轻度认知障碍;进食障碍;言语障碍;特定性运动功能发育障碍;涉及使用其他康复操作的医疗;颅内损伤伴有延长的昏迷;硬膜外血肿;颞骨骨折;脑挫伤;胫腓骨下端骨折	好转	刘宝华	商萍	覃燕青	日常生活动作训练;语言障碍训练;运动训练;作业疗法;低频脉冲电治疗;电动起立床训练;其他控制气压和空气成分的疗法;物理疗法
1432	C06肿瘤放化疗、神经康复	2023-12-16	2023-12-23	3461640	卓桂忠	男	65Y	胃恶性肿瘤	骨继发恶性肿瘤;颈椎骨折C5;肝继发恶性肿瘤;多个部位淋巴结继发性的恶性肿瘤;颈椎间盘突出;颈椎椎管狭窄;颈椎退行性病变;痛风;肾功能不全;肺气肿;肾结石;后天性肾囊肿	未愈	吴剑	朱宝玲	林瑞芳	胃镜检查
1433	C06肿瘤放化疗、神经康复	2023-12-25	2023-12-28	3464399	徐秋艳	女	49Y	为肿瘤化学治疗疗程	卵巢恶性肿瘤;胸腔继发恶性肿瘤;胸椎骨折;肺的其他疾患;肝囊肿	好转	吴剑	吴剑	周盈盈2	静脉注射化疗药物
1434	C07泌尿	2022-12-24	2023-01-16	3314422	周仁禄	男	50Y	创伤性肾血肿	肋骨骨折;高血压病	好转	陈映鹤	陈映鹤	陈映鹤
1435	C07泌尿	2022-12-27	2023-01-28	3324732	陈秀连	女	58Y	肾上腺肿物	2型糖尿病;高血压病;骨质疏松;腰椎骨折;腰椎退行性病变;颈椎退行性病变;动脉粥样硬化;下肢动脉粥样硬化;高脂血症;库欣综合征;原发性醛固酮过多症;肺结节;肺恶性肿瘤;肺部感染;甲状腺结节	未愈	何有华	木海琦	王帅彬	胃镜检查;结肠镜检查
1436	C07泌尿	2023-02-26	2023-03-07	3339189	张服宝	男	68Y	前列腺增生	陈旧性腓骨骨折;睾丸鞘膜积液;后天性肾囊肿;肾结石;下肢动脉粥样硬化;胆囊结石;2型糖尿病;关节炎;胆囊息肉	好转	张磊	张磊	陈超豪2
1437	C07泌尿	2023-04-13	2023-04-24	3358535	滕延寿	男	74Y	肱骨干骨折	高血压病;2型糖尿病;膀胱肿瘤;特指手术后状态	治愈	陈映鹤	南存金	218305	肱骨骨折切开复位钢板内固定术;经尿道膀胱病损电切术
1438	C07泌尿	2023-05-06	2023-05-07	3363595	朱思廷	男	64Y	前列腺增生	骨折治疗后恢复期;血浆蛋白特指异常	未愈	陈映鹤	南存金	柯润疆	超声引导下前列腺穿刺活检
1439	C07泌尿	2023-05-06	2023-05-13	3365525	周秋芬	女	57Y	肾结石	尺骨茎突骨折;糖尿病;桡骨骨折;慢性骨髓增生性疾病;高血压病	治愈	竺海波	王怡君	王怡君	经尿道输尿管/肾盂激光碎石取石术
1440	C07泌尿	2023-05-26	2023-05-27	3371447	卓焕焜	男	75Y	膀胱颈狭窄	骨折治疗后恢复期;尿潴留;前列腺恶性肿瘤;高血压;慢性阻塞性肺疾病	好转	竺海波	竺海波	王怡君	尿道扩张;输尿管镜检查
1441	C07泌尿	2023-05-10	2023-05-28	3371770	蔡乾满	男	88Y	股骨粗隆间骨折	前列腺结石;后天性肾囊肿;脂肪肝;前列腺增生	治愈	竺海波	竺海波	王怡君	股骨骨折闭合复位螺钉内固定术;膀胱造口术
1442	C07泌尿	2023-06-12	2023-06-16	3379529	厉秀光	男	64Y	肾积水伴肾输尿管结石	后天性肾囊肿;高血压病;腰椎骨折;糖尿病	治愈	竺海波	王怡君	王怡君	经尿道输尿管/肾盂激光碎石取石术
1443	C07泌尿	2023-06-16	2023-06-22	3382261	黄连连	女	59Y	肾积水伴肾输尿管结石	后天性肾囊肿;肋骨骨折;肾错构瘤;输尿管积水;肝囊肿;脂肪肝	治愈	陈映鹤	杨森	柯润疆	经尿道输尿管/肾盂激光碎石取石术
1444	C07泌尿	2023-06-01	2023-07-01	3386200	周孙坑	男	79Y	阴囊蜂窝织炎	肋骨骨折;心包积液;胸腔积液;后天性肾囊肿;肝囊肿;多发性脑梗死;尿道狭窄;前列腺增生;泌尿道感染	治愈	竺海波	王怡君	王怡君	膀胱穿刺术;阴囊病损切除术
1445	C07泌尿	2023-06-20	2023-07-06	3388266	徐定月	男	84Y	前列腺恶性肿瘤	骨继发恶性肿瘤;肺部结节;高血压;脑血管病后遗症;陈旧性肋骨骨折;肝囊肿;颈动脉硬化;下肢动脉粥样硬化;肺气肿	好转	竺海波	虞海峰	王怡君	超声引导下前列腺穿刺活检
1446	C07泌尿	2023-07-08	2023-07-22	3395553	何必庆	男	62Y	膀胱恶性肿瘤	膀胱炎;后天性肾囊肿;肝囊肿;冠状动脉粥样硬化（狭窄）;前列腺增生;脊柱压缩性骨折;窦性心动过缓;前列腺结石	治愈	竺海波	虞海峰	虞海峰	经尿道膀胱病损电切术
1447	C07泌尿	2023-07-26	2023-08-02	3400684	秦永	男	27Y	泌尿道感染	膀胱结石;创伤性尿道断裂;骨盆骨折;尾骨骨折	未愈	何有华	木海琦	南存金
1448	C07泌尿	2023-07-28	2023-08-02	3400698	黄兆川	男	53Y	膀胱结石	截瘫;骨折治疗后恢复期	治愈	陈映鹤	陈映鹤	陈映鹤	经尿道膀胱激光碎石术
1449	C07泌尿	2023-07-28	2023-08-05	3402005	周秀华	女	69Y	泌尿道感染	获得性维生素K依赖因子缺乏症;后天性肾囊肿;肾结石;肝囊肿;脑卒中后遗症;高血压;骨折术后恢复期;膀胱结石	好转	陈映鹤	陈映鹤	陈映鹤
1450	C07泌尿	2023-07-31	2023-08-14	3406253	郭仁多	男	63Y	前列腺恶性肿瘤	高血压;2型糖尿病;前列腺增生;前列腺结石;脊髓损伤;颈椎间盘突出;胸椎骨折T3/T4;手术后状态，其他特指的	好转	木海琦	木海琦	木海琦	超声引导下前列腺穿刺活检;颈椎植骨术
1451	C07泌尿	2023-08-12	2023-08-25	3411003	严定新	男	81Y	股骨粗隆间骨折	前列腺增生;脂肪肝;多发性肝囊肿;后天性肾囊肿;胸腔积液	治愈	竺海波	饶大庞	刘翔	股骨骨折闭合复位螺钉内固定术
1452	C07泌尿	2023-08-26	2023-09-02	3414154	王召俊	男	53Y	肾上腺良性肿瘤	肩关节扭伤;前列腺增生;后天性肾囊肿;腰椎骨折	治愈	陈映鹤	陈映鹤	陈映鹤	腹腔镜肾上腺部分切除术;腹腔镜下肾周粘连松解术
1453	C07泌尿	2023-09-09	2023-09-17	3420316	张文定	男	72Y	肾积水伴肾输尿管结石	泌尿道感染;特发性(原发性)高血压;胸椎骨折T11/T12;肺炎;前列腺结石	治愈	何有华	木海琦	陈超豪2	经皮肾镜取石术
1454	C07泌尿	2023-09-18	2023-09-20	3421771	尤大伍	男	69Y	肾积水伴输尿管结石	后天性肾囊肿;特发性(原发性)高血压;肋骨多处骨折;胆囊结石	治愈	陈映鹤	杨森	陈映鹤	经尿道膀胱镜输尿管导管插入术;经尿道膀胱镜输尿管扩张术
1455	C07泌尿	2023-10-04	2023-10-05	3427876	金贤申	男	37Y	附睾炎	神经源性膀胱;精神分裂症;腰椎骨折;截瘫	好转	竺海波	饶大庞	刘翔
1456	C07泌尿	2023-10-22	2023-11-01	3439218	林继林	男	72Y	肾上腺良性肿瘤	高血压;2型糖尿病;手术后状态，其他特指的;甲状腺功能减退症，其他特指的;胫前动脉狭窄;下肢动脉粥样硬化;陈旧性锁骨骨折;后天性肾囊肿	治愈	陈映鹤	陈映鹤	陈映鹤	腹腔镜肾上腺部分切除术
1457	C07泌尿	2023-10-28	2023-11-05	3440856	胡加芳	男	76Y	前列腺恶性肿瘤	前列腺增生;后天性肾囊肿;骨折术后恢复期	未愈	何有华	南存金	柯润疆	超声引导下前列腺穿刺活检
1458	C07泌尿	2023-11-13	2023-11-16	3445707	林德汉	男	59Y	膀胱结石	输尿管结石;肾挛缩;后天性肾囊肿;特发性(原发性)高血压;肋骨多处骨折	治愈	陈映鹤	陈映鹤	陈映鹤	经尿道输尿管/肾盂激光碎石取石术
1459	C07泌尿	2023-10-26	2023-11-20	3447479	潘正春	男	49Y	肾恶性肿瘤	2型糖尿病;2型糖尿病性视网膜病变;2型糖尿病性肾病;高血压2级;高脂血症;下肢动脉粥样硬化;脂肪肝;胆囊结石;陈旧性肋骨骨折	治愈	何有华	南存金	柯润疆	腹腔镜下单侧肾切除术;腹腔镜下肾周粘连松解术
1460	C07泌尿	2023-11-22	2023-11-26	3450201	金贤申	男	37Y	神经源性膀胱	腰椎骨折;高位截瘫;胆囊息肉;精子囊肿;睾丸鞘膜积液	好转	陈映鹤	陈映鹤	陈映鹤	膀胱造口术
1461	C07泌尿	2023-11-26	2023-12-02	3452497	李传付	男	66Y	手术后瘢痕性尿道闭锁	尿道狭窄;手术后恢复期;泌尿道感染;肾结石;2型糖尿病;乙型病毒性肝炎;陈旧性耻骨骨折;膀胱造口维护	好转	陈映鹤	范来来	陈映鹤	膀胱造口术
1462	C07泌尿	2023-11-29	2023-12-06	3454443	王小云	女	73Y	肾上腺脂肪瘤	肾结石;胸椎压缩性骨折;腰椎骨折	治愈	陈映鹤	陈映鹤	陈映鹤	腹腔镜肾上腺部分切除术;腹腔镜下肾周粘连松解术
1463	C07泌尿	2023-12-09	2023-12-19	3460217	蒋彩香	女	88Y	输尿管结石	泌尿道感染;2型糖尿病;骨质疏松伴有病理性骨折;肝囊肿;后天性肾囊肿;下肢动脉粥样硬化	治愈	何有华	杨森	柯润疆	输尿管导管去除;经尿道输尿管/肾盂超声碎石术
1464	C07泌尿	2023-12-12	2023-12-19	3460222	陈罗灿	男	50Y	膀胱结石	膀胱过度活动症;泌尿道感染;臂丛神经损伤;腹部损伤;胰腺损伤;肠系膜动脉损伤;开放性肠系膜血肿;十二指肠损伤;头部的损伤;骨折治疗后恢复期	治愈	何有华	杨森	柯润疆	经尿道输尿管/肾盂激光碎石术
1465	C07泌尿	2023-12-16	2023-12-24	3462118	张岳良	男	79Y	膀胱恶性肿瘤	膀胱出血;急性失血性贫血;肝囊肿;后天性肾囊肿;肋骨骨折;髋关节退行性病变	治愈	竺海波	虞海峰	刘翔	经尿道膀胱病损切除术;经尿道膀胱血块清除术
1466	C08肛肠科	2023-04-10	2023-04-17	3355471	邓书评	男	37Y	膀胱结石	陈旧性肩胛骨骨折;陈旧性耻骨骨折;陈旧性腰椎骨折;颅内损伤	治愈	陈映鹤	南存金	218305	经尿道膀胱碎石钳碎石取石术
1467	C08肛肠科	2023-05-15	2023-05-27	3371635	秦永	男	27Y	尿道断裂	耻骨骨折	治愈	何有华	木海琦	刘翔	尿道会师术
1468	C08肛肠科	2023-06-15	2023-06-18	3380430	吴平清	男	36Y	股骨干骨折	乙型肝炎小三阳;发育异常性单侧髋关节病;先天性髋关节发育不良	好转	翁益民	翁益民	项光恒
1469	C08肛肠科	2023-06-15	2023-06-20	3381474	张文潘	男	45Y	腓骨骨折伴踝骨折	前列腺结石;脂肪肝	治愈	陈华	孙辽军	蔡乐益	踝关节骨折切开复位钢针内固定术;踝关节的其他修补术
1470	C08肛肠科	2023-06-26	2023-06-28	3384915	李昊逾	男	13Y	胫腓骨干骨折		未愈	翁益民	翁益民	项光恒
1471	C08肛肠科	2023-06-19	2023-07-01	3386007	吴美香	女	66Y	脱垂性内痔	慢性萎缩性胃炎;肾结石;肋骨骨折	治愈	金定国	郑晨果	郑晨果	痔注射;直肠黏膜悬吊术;痔结扎术
1472	C08肛肠科	2023-07-05	2023-07-11	3390663	阮健一	男	45Y	锁骨骨折	脂肪肝;后天性肾囊肿	好转	陈华	孙辽军	蔡乐益	锁骨植骨术;锁骨骨折切开复位钢针内固定术
1473	C08肛肠科	2023-07-08	2023-07-15	3392562	陈乃小	男	48Y	外踝骨折	髌骨骨折;肺部结节	治愈	余可和	余可和	王少华2	踝关节骨折切开复位钢板内固定术;髌骨骨折切开复位螺钉内固定术
1474	C08肛肠科	2023-07-06	2023-07-19	3394530	金才斌	男	31Y	肛门损伤	下肢皮肤套脱伤;头皮血肿;腰椎骨折	治愈	陈邦飞	金纯	周崇俊	肛门成形术;皮肤和皮下坏死组织切除清创术
1475	C08肛肠科	2023-07-28	2023-07-31	3399712	林小霞	女	56Y	取除骨折内固定装置		其他	洪建军	卢晓郎	卢晓郎	踝关节内固定装置去除术
1476	C08肛肠科	2023-07-24	2023-08-02	3400674	傅文涛	男	24Y	腓骨骨折累及踝关节	脂肪肝	治愈	陈龙	陈龙	王特	踝关节修补术;踝关节骨折切开复位钢板内固定术;腓骨骨折切开复位钢板内固定术
1477	C08肛肠科	2023-07-24	2023-08-05	3401928	曾湖南	男	35Y	股骨粗隆下骨折	创伤性胸腔积液	好转	翁益民	翁益民	项光恒	股骨骨折闭合复位髓内针内固定术
1478	C08肛肠科	2023-08-02	2023-08-05	3401978	周成花	女	69Y	股骨髁间骨折	糖尿病;胆囊结石	好转	陈华	孙辽军	蔡乐益
1479	C08肛肠科	2023-09-27	2023-09-30	3426224	耿林美	女	60Y	取除骨折内固定装置	膝关节退行性病变;老年性心脏病;下肢动脉粥样硬化;后天性肾囊肿;肺的其他疾患	其他	赵友明	柯陈荣	219048	髌骨内固定装置去除术
1480	C08肛肠科	2023-09-27	2023-09-30	3426229	徐夏珠	女	53Y	取除骨折内固定装置	脂肪肝;下肢静脉曲张	其他	赵友明	柯陈荣	219048	跖骨内固定装置去除术
1481	C08肛肠科	2023-09-26	2023-10-05	3427875	陈素娜	女	27Y	锁骨骨折	肩锁关节脱位;脂肪肝;胆囊结石	治愈	陈龙	应晓洲	应晓洲	肩关节脱位手法整复术;锁骨骨折切开复位钢针内固定术
1482	C08肛肠科	2023-11-14	2023-11-16	3445987	徐成迁	男	30Y	取除骨折内固定装置		其他	陈星隆	周飞亚	朱旭伟	尺骨内固定装置去除术;皮肤瘢痕切除术;皮瓣修整术
1483	C08肛肠科	2023-11-15	2023-11-18	3446688	刘世宗	男	20Y	掌骨骨折	皮肤裂伤	好转	冯永增	冯永增	冯永增	掌骨骨折切开复位钢板内固定术
1484	C08肛肠科	2023-11-15	2023-11-21	3447944	孙海堡	男	27Y	跖骨骨折	跟骨骨折;骰骨骨折	治愈	黄义星	黄义星	张儒	跖骨骨折切开复位钢针内固定术
1485	C08肛肠科	2023-11-22	2023-11-30	3451948	熊贤静	男	31Y	肱骨大结节骨折	肩袖损伤;前臂尺神经损伤;前列腺结石	治愈	陈龙	应晓洲	应晓洲	肱骨骨折切开复位钢板内固定术;肩袖修补术
1486	C08肛肠科	2023-12-04	2023-12-14	3457959	黄菊花	女	86Y	股骨颈骨折	肺的其他疾患;三尖瓣疾病,其他的;肺动脉高压中度;二尖瓣关闭不全;心功能不全;下肢静脉曲张	治愈	陈龙	应晓洲	应晓洲	人工股骨头置换术;髋关节滑膜切除术
1487	C08肛肠科	2023-12-08	2023-12-18	3459552	郑素芳	女	56Y	跖骨骨折	趾骨骨折，其他的;后天性肾囊肿;肾结石	治愈	陈龙	应晓洲	应晓洲	跖骨骨折切开复位钢针内固定术
1488	C08肛肠科	2023-12-05	2023-12-19	3460191	胡咏麟	男	16Y	尺骨桡骨闭合性骨折	前臂桡神经损伤	好转	翁益民	翁益民	王特	尺骨骨折切开复位钢板内固定术;桡骨骨折切开复位钢板内固定术
1489	C08肛肠科	2023-12-17	2023-12-20	3460433	李求营	男	49Y	桡骨下端骨折		治愈	黄义星	黄义星	张儒
1490	C08肛肠科	2023-12-07	2023-12-21	3460997	叶笑英	女	64Y	桡骨远端骨折	肱骨近端骨折;面部损伤;脂肪肝;肋骨骨折	好转	翁益民	翁益民	王特	桡骨骨折闭合复位钢板内固定术;人工肱骨头置换术
1491	C08肛肠科	2023-12-18	2023-12-25	3462676	吴清芬	女	63Y	肱骨近端骨折	肩袖损伤;脂肪肝;肝囊肿;骨质疏松;主动脉瓣疾患，其他的;主动脉(瓣)关闭不全	治愈	陈龙	应晓洲	应晓洲	肱骨骨折闭合复位钢板内固定术;肩袖修补术
1492	C08肛肠科	2023-12-17	2023-12-29	3464517	吴文昌	男	29Y	肾挫伤	肋骨骨折;前列腺钙化灶	好转	竺海波	饶大庞	刘翔
1493	C09肛肠科	2023-02-20	2023-02-27	3335915	柯龙凤	女	69Y	直肠良性肿瘤	骨质疏松伴病理性骨折;混合痔	治愈	刘长宝	蔡锚	蔡锚	直肠病损切除术
1494	C09肛肠科	2023-03-04	2023-03-07	3339173	张菊妹	女	64Y	输尿管结石伴肾结石	肾结石;胆囊结石;腰椎骨折;泌尿道感染;脂肪肝;肺结节	治愈	何有华	何有华	王帅彬	经尿道输尿管镜激光碎石取石术(肾盂\输尿管);输尿管镜检查
1495	C09肛肠科	2023-03-08	2023-03-14	3341972	陈鸣放	男	61Y	混合痔	多发性肋骨骨折	治愈	刘长宝	陈奕	陈奕	痔结扎术
1496	C09肛肠科	2023-06-16	2023-06-28	3384828	谢彩英	女	65Y	胫腓骨闭合性骨折	特发性（原发性）高血压;脂肪肝	治愈	余可和	余可和	王少华2	胫骨骨折切开复位钢板内固定术;关节软骨修复术;膝关节半月板成形术
1497	C09肛肠科	2023-07-04	2023-07-11	3390519	黄银荣	男	45Y	髌骨骨折	肺间质纤维化;肺部结节;脂肪肝	好转	王振文	水小龙	徐宏威	髌骨骨折切开复位螺钉内固定术
1498	C09肛肠科	2023-07-02	2023-07-18	3393842	翁卿吕	男	56Y	直肠恶性肿瘤	胸椎压缩性骨折;肝血管瘤;肺气肿;前列腺钙化灶;腰椎小关节紊乱	好转	刘长宝	蔡锚	蔡锚	直肠根治术
1499	C09肛肠科	2023-06-26	2023-07-19	3394367	叶必新	男	71Y	直肠恶性肿瘤	肝囊肿;胆囊结石伴慢性胆囊炎;肺部结节;手术后状态，其他特指的;前列腺钙化灶;肾结石;肋骨骨折;甲状腺囊肿	好转	刘长宝	蔡锚	蔡锚	腹腔镜下直肠根治术
1500	C09肛肠科	2023-07-18	2023-07-25	3397127	孙作秋	男	56Y	肾积水伴肾结石	前列腺结石;陈旧性肋骨骨折	好转	竺海波	虞海峰	王怡君	输尿管镜检查;输尿管扩张术
1501	C09肛肠科	2023-09-02	2023-09-11	3418059	吴朝德	男	54Y	创伤性肛门裂伤	肱骨头骨折;腰椎骨折;肋骨骨折	好转	刘长宝	蔡锚	蔡锚	皮肤和皮下组织非切除性清创;肛门成形术
1502	C09肛肠科	2023-09-20	2023-10-14	3431099	毕攻胜	男	61Y	结肠恶性肿瘤	指骨骨折;手指指神经损伤,其他的;多处挫伤;高血压;中度贫血;多发性结肠息肉;胃溃疡;反流性食管炎;慢性胃炎;十二指肠炎;脂肪肝;后天性肾囊肿;肾结石;肾上腺良性肿瘤;短暂性脑缺血发作;脱髓鞘病;尺骨茎突骨折伴桡骨远端骨折	好转	刘长宝	蔡锚	蔡锚	右半结肠根治性切除术;皮肤和皮下组织非切除性清创;指神经缝合术;桡骨骨折切开复位钢板内固定术;指骨骨折切开复位钢板内固定术
1503	C09肛肠科	2023-11-15	2023-11-21	3447929	陈家盛	男	15Y	髂骨骨折		好转	冯永增	冯永增		髂骨骨折切开复位钢板内固定术
1504	C09肛肠科	2023-11-16	2023-11-23	3449009	方祥枝	男	50Y	股骨干骨折	高血压;下肢静脉血栓形成	好转	冯永增	冯永增		股骨骨折闭合复位螺钉内固定术
1505	C10感染内科	2022-12-25	2023-01-05	3315728	林丹花	女	72Y	脓毒血症	精神障碍;股骨粗隆间骨折;腔隙性脑梗死;高血压病;动脉粥样硬化;上颌窦筛窦炎;甲状腺结节	好转	潘陈为	方佩佩2	黄珊珊	腰椎穿刺
1506	C10感染内科	2023-01-02	2023-01-11	3318094	余秀芬	女	60Y	肝病	急性上呼吸道感染;胆囊切除术后状态;腰椎骨折	好转	周光耀	方佩佩2	黄珊珊
1507	C10感染内科	2023-01-04	2023-01-18	3320644	王露西	女	16Y	泌尿道感染	肺部感染;脊髓损伤;截瘫;骨盆骨折;肋骨骨折;脑血管瘤;胆囊切除术后状态	治愈	周光耀	方佩佩2	林秀珍
1508	C10感染内科	2023-02-10	2023-02-19	3332519	沈玉连	女	61Y	肺部感染	骨质疏松伴病理性骨折	好转	诸葛璐	李杰	吴佐罗
1509	C10感染内科	2023-01-22	2023-03-07	3339003	刘小宫	女	80Y	重症肺炎	心功能不全;高血压病;呼吸衰竭;肾功能异常;感染性休克;骨质疏松;胸腔积液;贫血;腰椎骨折L3;特指动脉动脉粥样硬化;老年性心脏瓣膜病;腰椎间盘突出;腰椎退行性病变;老年性脑萎缩	好转	周光耀	方佩佩2	林秀珍	胸腔穿刺术
1510	C10感染内科	2023-03-13	2023-03-18	3343280	池芝华	女	61Y	原发性胆汁性肝硬变	肾结石;腰椎间盘突出;脊柱压缩性骨折;血管瘤，任何部位;胆囊结石;肝硬化失代偿期;脾功能亢进;腹水;特指手术后状态	未愈	诸葛璐	李杰	吴佐罗
1511	C10感染内科	2023-02-10	2023-03-18	3343281	金秀芬	女	69Y	股骨颈骨折	原发性胆汁型肝硬化伴食管胃底静脉曲张;胃息肉;高血压性心脏病;肺部感染;慢性胃炎;骨质疏松;脾功能亢进;腰椎骨折L2	好转	诸葛璐	李杰	吴佐罗	腰椎骨折球囊扩张成形术;经皮椎骨成形术;人工股骨头置换术
1512	C10感染内科	2023-02-20	2023-03-18	3343607	叶麦花	女	71Y	脓毒血症	胸腔积液;阵发性心房纤颤;感染性心肌炎;陈旧性肺结核;肺部感染;肝病;感染性休克;股骨颈骨折;特指感染性胃肠炎和结肠炎;肺动脉高压中度;心功能Ⅲ级;毁损肺;重度蛋白质-能量营养不良;老年性心脏瓣膜病	治愈	周光耀	方佩佩2	林秀珍
1513	C10感染内科	2023-03-05	2023-04-01	3348954	张祖富	男	56Y	颈椎多处骨折	肺结节;下肢静脉血栓形成;肺部感染;泌尿道感染;颈部脊髓损伤;铜绿假单胞菌败血症	好转	诸葛璐	李杰	吴佐罗	前柱其他颈融合，前路法;后柱其他颈融合，后路法
1514	C10感染内科	2023-03-20	2023-04-02	3349832	邓敏喆	女	41Y	妊娠合并败血症	妊娠合并子宫瘢痕;妊娠合并脂肪肝;妊娠合并肝损害;骨折治疗后恢复期;妊娠合并胆囊息肉	治愈	诸葛璐	李杰	吴佐罗
1515	C10感染内科	2023-04-11	2023-04-19	3356224	金小莲	女	66Y	大肠杆菌败血症	胆囊息肉;冠状动脉粥样硬化;肾结石;多发性肋骨骨折;腰椎间盘突出;肝炎后肝硬化失代偿期;脾功能亢进;腹水;泌尿道感染	好转	诸葛璐	李杰	吴佐罗	腹腔穿刺术
1516	C10感染内科	2023-04-15	2023-04-24	3358194	张连英	女	49Y	淋巴管炎	纵隔肿物;陈旧性距骨骨折;肾结石;下肢动脉粥样硬化;静脉栓塞和血栓形成;高血压病;特指糖尿病伴肾并发症;2型糖尿病性周围神经病;2型糖尿病性视网膜病变;陈旧性胫骨骨折;下肢皮肤感染	好转	周光耀	方佩佩2	林秀珍
1517	C10感染内科	2023-04-20	2023-04-26	3359180	胡林地	女	82Y	脓毒血症	腰椎间盘突出;左室肥大;心房颤动;原发性肺动脉高压;高血压病;主动脉瓣及三尖瓣关闭不全;2型糖尿病;胸椎骨折;心包积液;冠状动脉粥样硬化性心脏病	治愈	周光耀	方佩佩2	林秀珍
1518	C10感染内科	2023-04-30	2023-05-08	3363631	陈艮翠	女	65Y	自主神经功能紊乱	多发性肋骨骨折;下肢动脉粥样硬化	好转	诸葛璐	李杰	李杰
1519	C10感染内科	2023-05-03	2023-05-14	3366080	张宝俊	男	85Y	泌尿道感染	二尖瓣及主动脉瓣关闭不全;胸椎退行性病变;心律失常;2型糖尿病;腰椎骨折;前列腺增生;动脉粥样硬化;脂肪肝;肺部感染;冠状动脉粥样硬化性心脏病;老年性白内障;后天性肾囊肿;肝囊肿	好转	潘陈为	方佩佩2	吴佐罗
1520	C10感染内科	2023-05-05	2023-05-22	3369516	杨阿香	女	72Y	脓毒血症	腔隙性脑梗死;后天性肾囊肿;肺部感染;脂肪肝;陈旧性肋骨骨折;2型糖尿病;老年性心脏病;腹壁疝;支气管哮喘，非危重;高血压;肾结石	治愈	诸葛璐	李杰	李杰
1521	C10感染内科	2023-05-28	2023-06-04	3374642	郑迪妹	女	67Y	大肠杆菌败血症	骨折治疗后恢复期;2型糖尿病	好转	诸葛璐	李杰	李杰
1522	C10感染内科	2023-06-06	2023-06-13	3378621	胡崇元	男	78Y	脓毒血症	眼损伤;两根肋骨骨折不伴第一肋骨骨折;颞叶出血;高血压病;创伤性蛛网膜下腔出血;脑挫伤;腰椎骨折;泌尿道感染;肺部感染	好转	周光耀	周光耀	林秀珍
1523	C10感染内科	2023-05-14	2023-06-21	3381728	蔡春萍	女	55Y	革兰阴性杆菌败血症	特发性（原发性）高血压;陈旧性肋骨骨折;脂肪肝;类酵母菌败血症;肺结节病	好转	潘陈为	方佩佩2	吴佐罗
1524	C10感染内科	2023-06-17	2023-06-28	3384686	张友金	男	51Y	药物性肝损害	肾盂积水;肺大疱;胆囊内胆汁淤积;颈椎病;继发性甲状腺功能减退症;白细胞疾患;头皮血肿;肋骨骨折;腰椎骨折;肝囊肿;甲状腺结节;肾功能不全;后天性肾囊肿	好转	潘陈为	方佩佩2	吴佐罗
1525	C10感染内科	2023-05-29	2023-07-03	3386708	叶克永	男	69Y	表皮葡萄球菌败血症	陈旧性肋骨骨折;颈动脉硬化;后天性肾囊肿;脂肪肝;二尖瓣钙化;主动脉瓣生物瓣置换状态;机械瓣膜置换术后瓣周漏;下肢动脉硬化闭塞症;2型糖尿病;特发性（原发性）高血压;亚急性感染性心内膜炎;下肢缺血	治愈	周光耀	周光耀	林秀珍
1526	C10感染内科	2023-06-26	2023-07-16	3392719	陈显荣	男	74Y	脓毒血症	胆囊结石;骨折术后恢复期;前列腺增生;受压区压疮;乙型病毒性肝炎病原携带者;脑血管病后遗症;急性肾衰竭;肺部感染;泌尿道感染;贫血;低蛋白血症;胸腔积液;真菌感染;2型糖尿病;特发性（原发性）高血压;维生素D缺乏病;动脉粥样硬化;脂肪肝	好转	诸葛璐	李杰	李杰
1527	C10感染内科	2023-07-02	2023-07-22	3395339	孙进忠	男	78Y	肺部感染	脑梗死;脑出血后遗症;运动障碍;吞咽困难;言语障碍;颈动脉硬化;下肢动脉粥样硬化;支气管扩张（症）;特发性（原发性）高血压;2型糖尿病;股骨颈骨折;前列腺增生;前列腺结石;肺[部分]后天性缺失;胆囊结石;后天性肾囊肿	好转	潘陈为	方佩佩2	吴佐罗
1528	C10感染内科	2023-08-26	2023-09-02	3414515	潘锦水	男	74Y	脓毒血症	继发性血小板减少;中毒性肝炎;肾功能不全;后天性肾囊肿;脱髓鞘性脑病;脑软化灶;慢性鼻窦炎;陈旧性肋骨骨折	好转	周光耀	黄珊珊	林秀珍
1529	C10感染内科	2023-08-29	2023-09-05	3415556	邓军喜	男	50Y	慢性乙型病毒性肝炎	肝炎后肝硬化;糜烂性胃炎;腰椎压缩性骨折;胆囊息肉;膝关节退行性病变;十二指肠球炎	好转	周光耀	黄珊珊	林秀珍
1530	C10感染内科	2023-09-07	2023-09-16	3419795	张崇玉	女	65Y	软组织感染	桡骨头骨折;头部的损伤;腘窝囊肿;后天性肾囊肿;腔隙性脑梗死;肺气肿;脂肪肝;下肢动脉粥样硬化	治愈	潘陈为	方佩佩2	219081
1531	C10感染内科	2023-09-12	2023-09-24	3423170	陈步催	男	51Y	前臂其他部位的开放性伤口	软组织感染;2型糖尿病;肺部感染;胸腔积液;副拇指;肋骨骨折;肺气肿;肝囊肿;脂肪肝;低钾血症;低蛋白血症	好转	周光耀	黄珊珊	林秀珍
1532	C10感染内科	2023-10-02	2023-10-07	3428279	庄定英	女	72Y	肠道感染	胆囊切除术后状态;三根肋骨骨折不伴第一肋骨骨折;脂肪肝;肺部感染;孤立性肺结节;特发性(原发性)高血压;抑郁发作	好转	周光耀	黄珊珊	林秀珍
1533	C10感染内科	2023-10-09	2023-10-18	3432912	朱文文	女	59Y	肺部感染	肺大疱;精神分裂症;2型糖尿病;肝囊肿;陈旧性肋骨骨折;残胃炎;残胃吻合口炎	好转	潘陈为	方佩佩2	219081
1534	C10感染内科	2023-10-14	2023-10-21	3434031	郑飞云	女	60Y	急性胃肠炎	泌尿道感染;下肢动脉粥样硬化;慢性胃炎;反流性食管炎;肾结石;胆囊切除术后状态;陈旧性耻骨骨折	好转	潘陈为	方佩佩2	219081
1535	C10感染内科	2023-10-22	2023-10-25	3436306	张永英	女	55Y	脓毒血症	中毒性肝炎;急性肾功能不全;中毒性脑病;陈旧性肋骨骨折;股骨颈骨折;陈旧性耻骨骨折;肺诊断性影像异常;特发性肺纤维化;肝下垂;胆囊肥大;骨纤维异样增殖症	治愈	潘陈为	方佩佩2	219081
1536	C10感染内科	2023-10-24	2023-10-29	3437550	苏明奶	女	76Y	大肠杆菌败血症	急性肾盂肾炎;低蛋白血症;骨折术后恢复期;下肢动脉粥样硬化;特发性(原发性)高血压	治愈	潘陈为	方佩佩2	219081
1537	C10感染内科	2023-10-25	2023-11-05	3440667	何文斌	男	74Y	脓毒血症	慢性支气管炎急性发作;心功能不全;冠状动脉粥样硬化性心脏病;急性冠脉综合征;慢性肾功能不全;尺骨和桡骨下端均骨折;掌骨骨折;足舟状骨骨折;高尿酸血症	好转	潘陈为	方佩佩2
1538	C10感染内科	2023-11-09	2023-12-02	3452500	鲍爱纯	女	54Y	非典型性肺炎	胸腔积液;甲状腺结节;桡骨远端骨折;高脂血症;脂肪肝	好转	金玲湘	黄珊珊	林秀珍
1539	C11肾内科	2022-12-24	2023-01-02	3314552	陈旺弟	女	74Y	类风湿性关节炎	2型糖尿病;颈椎间盘突出;腰椎间盘突出;骨质疏松伴病理性骨折;腰椎骨折;颈椎退行性病变;腰椎退行性病变	好转	王红	郑淑蓓	金怡
1540	C11肾内科	2023-01-07	2023-01-08	3316762	侯定兴	男	73Y	2型糖尿病性肾病	慢性肾脏病5期;腹膜透析;支气管扩张伴感染;陈旧性肋骨骨折;后天性肾囊肿;Ⅰ度房室传导阻滞;主动脉瓣硬化;冠状动脉粥样硬化	好转	李占园	陈琰	徐晓燕2	腹膜透析
1541	C11肾内科	2022-12-28	2023-01-09	3316849	翁仁谦	男	75Y	特指药物、药剂和生物制品诱发肾病	肺部感染;纵隔淋巴结肿大;肺结节;陈旧性肋骨骨折;前列腺结石;慢性上颌窦炎;腋下淋巴结肿大;肺大泡;主动脉瓣钙化;冠状动脉粥样硬化;前列腺钙化灶;急性间质性肾炎;痛风;肝功能不全	好转	赵艳玲	潘敏	潘敏
1542	C11肾内科	2023-01-11	2023-01-14	3318945	陈玉英	女	62Y	骨质疏松伴病理性骨折	2型糖尿病;高脂血症;脂肪肝;纤维囊性乳腺病;甲状腺结节;胆囊息肉;子宫切除术后状态	好转	郑淑蓓	郑淑蓓	金怡
1543	C11肾内科	2023-01-18	2023-01-21	3321739	汤凤蕊	女	78Y	类风湿性关节炎	骨质疏松;高血压病;胆囊结石;肝囊肿;肾结石;陈旧性肋骨骨折	好转	郑淑蓓	郑淑蓓	金怡
1544	C11肾内科	2023-01-11	2023-01-23	3322951	侯定兴	男	73Y	2型糖尿病性肾病	腹膜透析;支气管扩张伴感染;腹水;陈旧性肋骨骨折;后天性肾囊肿;Ⅰ度房室传导阻滞;主动脉粥样硬化;冠状动脉粥样硬化;慢性肾脏病5期	好转	李占园	陈琰	徐晓燕2
1545	C11肾内科	2023-01-02	2023-01-24	3323378	陈友琦	男	60Y	2型糖尿病性肾病	后天性肾囊肿;颈动脉硬化;肋骨骨折;多发性脑梗死;脑白质营养不良;老年性脑萎缩;下肢动脉粥样硬化;慢性肾脏病5期;腹膜透析;血液透析;心功能Ⅲ级;轻度贫血;肺特指疾患;高血压病;胆囊结石;肾结石	好转	戴彩香	戴彩香	戴彩香	为肾透析的动静脉造瘘术;血液透析;腹膜透析
1546	C11肾内科	2023-01-17	2023-01-29	3325453	徐学闹	男	53Y	2型糖尿病性肾病	肺气肿;前列腺增生;下肢动脉粥样硬化;颈动脉硬化;膝关节积液;后天性肾囊肿;慢性肾脏病5期;继发性贫血;高钾血症;高磷酸盐血症;陈旧性胫骨骨折;下肢静脉血栓形成;急性上呼吸道感染;高血压病;腔隙性脑梗死	好转	李占园	陈琰	徐晓燕2
1547	C11肾内科	2023-01-24	2023-01-29	3325666	黄冬菜	女	62Y	类风湿性关节炎	完全性右束支传导阻滞;股骨头无菌性坏死;腔隙性脑梗死;冠状动脉粥样硬化性心脏病;胸椎骨折;脊柱压缩性骨折;骨质疏松;间质性肺病;食管炎;胆囊炎;肾结石;慢性胃炎;子宫平滑肌瘤	好转	周志宏	张益前	廖秋眉
1548	C11肾内科	2023-01-30	2023-01-31	3326713	高艳	女	52Y	强直性脊柱炎	陈旧性肺结核;后天性肾囊肿;子宫切除术后状态;人工髋关节;陈旧性肋骨骨折	好转	周志宏	张益前	廖秋眉
1549	C11肾内科	2023-01-31	2023-02-01	3327261	陈旺弟	女	75Y	类风湿性关节炎	2型糖尿病;颈椎间盘突出;腰椎间盘突出;骨质疏松;应力性骨折;颈椎退行性病变;腰椎退行性病变	好转	郑淑蓓	郑淑蓓	黄文文
1550	C11肾内科	2023-01-05	2023-02-02	3327794	王美英	女	76Y	脓毒血症	腔隙性脑梗死;肺部感染;慢性肾脏病5期;高血压性肾衰竭;急性胆囊炎;骨质疏松;后天性肾囊肿;膀胱结石;肺大泡;应力性骨折;血液透析;甲状腺机能减退症;胆囊占位性病变;痛风	好转	毛朝鸣	赵艳玲	黄文	超声引导下经皮肝穿刺胆管引流术
1551	C11肾内科	2023-02-13	2023-02-14	3330825	吕德俊	男	34Y	强直性脊柱炎	骨质疏松伴病理性骨折;胸椎骨折;脊柱压缩性骨折;颈椎间盘突出;高血压病;心脏扩大	好转	周志宏	张益前	廖秋眉
1552	C11肾内科	2023-02-02	2023-02-15	3331151	王美英	女	76Y	败血症	急性胆囊炎;高血压性肾病;血液透析;特指甲状腺功能减退症;痛风;胆囊占位性病变;骨质疏松;后天性肾囊肿;膀胱结石;肺大泡;骨折治疗后恢复期;多发性脑梗死;肺部感染	治愈	毛朝鸣	潘敏	潘敏
1553	C11肾内科	2023-02-15	2023-02-27	3335925	陈金妹	女	75Y	肺部感染	血液透析;2型糖尿病性肾病;高血压病;继发性甲状旁腺功能亢进症;循环系统操作后疾患;股骨骨折;胆囊切除术后状态	好转	周志宏	张益前	廖秋眉
1554	C11肾内科	2023-02-11	2023-03-04	3338008	郑大英	女	60Y	2型糖尿病性肾病	血液透析;非风湿性三尖瓣关闭不全;退行性主动脉瓣疾患;肺动脉高压中度;高血压病;甲状腺机能减退症;锁骨骨折;泌尿道感染;心房肥大;慢性肾脏病5期;非风湿性二尖瓣伴主动脉瓣关闭不全	好转	郑育	黄文	黄文	为肾透析的动静脉造瘘术;锁骨骨折切开复位钢板内固定术
1555	C11肾内科	2023-02-28	2023-03-05	3338224	金夏春	男	60Y	类风湿性关节炎伴肺间质纤维化	后天性肾囊肿;原发性双侧髋关节病;骨质疏松伴病理性骨折;脊椎退行性病变;高血压病;股骨头无菌性坏死;前列腺结石;前列腺增生;肝血管瘤;肺结节	好转	郑淑蓓	郑淑蓓	金怡
1556	C11肾内科	2023-03-09	2023-03-11	3340469	陈旺弟	女	75Y	类风湿性关节炎	高脂血症;骨质疏松伴病理性骨折;腰椎间盘突出;颈椎间盘突出;腰椎退行性病变;颈椎退行性病变;2型糖尿病	好转	叶菡洋	叶菡洋	金怡
1557	C11肾内科	2023-02-28	2023-03-11	3340491	张德亮	男	70Y	2型糖尿病肾病V期	陈旧性骨盆骨折;颅骨和面骨骨折后遗症;后天性肾囊肿;慢性肾脏病5期;颈动脉硬化;下肢动脉粥样硬化;肾性贫血;脑梗死;高血压性肾衰竭;高血压性视网膜病变;陈旧性肋骨骨折;前列腺增生;肾钙化;慢性胃炎;胃溃疡	好转	周志宏	张益前	廖秋眉
1558	C11肾内科	2023-02-21	2023-03-11	3340665	徐学闹	男	53Y	2型糖尿病性肾病	后天性肾囊肿;慢性肾脏病5期;颈动脉硬化;下肢动脉粥样硬化;膝关节积液;血液透析;腔隙性脑梗死;高血压病;陈旧性胫骨骨折;前列腺增生;肺气肿;下肢静脉血栓形成	好转	李占园	陈琰	黄文文	为肾透析的动静脉造瘘术
1559	C11肾内科	2023-03-12	2023-03-20	3344652	陈云	女	47Y	多发性大动脉炎	慢性肾衰竭;颈动脉闭塞和狭窄;肾性贫血;肾血管性高血压;陈旧性肋骨骨折;肝功能异常;肾萎缩;下肢深静脉血栓形成;腹主动脉狭窄;高脂血症	好转	周志宏	张益前	廖秋眉
1560	C11肾内科	2023-03-27	2023-03-28	3347867	王小琴	女	78Y	结缔组织病肺间质纤维化	下肢皮肤套脱伤;皮肤裂伤;后天性肾囊肿;纤维囊性乳腺病;高血压病;肱骨骨折;骨质疏松;甲状腺结节	好转	周志宏	张益前	廖秋眉
1561	C11肾内科	2023-03-21	2023-04-01	3349309	王美英	女	76Y	高血压性肾衰竭	胆囊炎;脑梗死;继发性甲状腺功能减退症;痛风;肺部感染;骨质疏松伴病理性骨折;血液透析	好转	郑育	黄文	黄文
1562	C11肾内科	2023-03-29	2023-04-04	3350541	周作石	男	82Y	高血压心脏和肾脏病伴有肾衰竭	后天性肾囊肿;下肢动脉粥样硬化;腰椎间盘突出;手术后恢复期;胆囊结石;腔隙性脑梗死;原发性肺动脉高压;胸椎骨折;骨质疏松;肺结节	好转	叶菡洋	叶菡洋	金怡
1563	C11肾内科	2023-03-26	2023-04-09	3352090	侯定兴	男	73Y	2型糖尿病肾病IV期	后天性肾囊肿;颈动脉硬化;下肢动脉粥样硬化;支气管扩张伴感染;高血压病;2型糖尿病;腹膜透析;陈旧性肋骨骨折;特指手术后状态	好转	李占园	陈琰	黄文文
1564	C11肾内科	2023-03-24	2023-04-15	3354890	陈友琦	男	60Y	2型糖尿病肾病IV期	陈旧性肋骨骨折;腹水;肝硬化;真菌感染;老年性脑萎缩;脱髓鞘性白质脑病;腹膜透析中腹腔感染;颈动脉硬化;下肢动脉粥样硬化;多发性脑梗死;心功能Ⅲ级;高血压病	好转	戴彩香	戴彩香	戴彩香	腹膜透析;腹膜透析腹腔法拔管;颈内静脉穿刺中心静脉置管术;血液透析
1565	C11肾内科	2023-03-18	2023-04-16	3355177	李仲英	女	84Y	高血压性肾病	肾结石;慢性肾脏病5期;伸直型桡骨下端骨折;下肢动脉粥样硬化;血液透析;高血压病;老年性脑萎缩;2型糖尿病;泌尿道感染;肝胆管扩张;肺部感染	好转	李占园	陈琰	黄文文	血液透析
1566	C11肾内科	2023-04-17	2023-04-18	3356175	陈旺弟	女	75Y	类风湿性关节炎	腰椎间盘突出;颈椎间盘突出;腰椎退行性病变;颈椎退行性病变;脊柱压缩性骨折;2型糖尿病;骨质疏松	好转	叶菡洋	叶菡洋	金怡
1567	C11肾内科	2023-04-25	2023-04-26	3359518	陈云	女	48Y	多发性大动脉炎	慢性肾衰竭;颈动脉硬化;腹主动脉粥样硬化;轻度贫血;肾血管性高血压;肋骨骨折;肾萎缩;下肢深静脉血栓形成;高脂血症;特指手术后状态	好转	周志宏	张益前	廖秋眉
1568	C11肾内科	2023-04-16	2023-04-28	3359938	赵长金	男	85Y	复发性血清阴性对称性滑膜炎伴凹陷性水肿	主动脉瓣关闭不全;二尖瓣关闭不全;高血压病;股骨粗隆间骨折;胸椎骨折;前列腺结石;胆囊息肉;肺部感染;心脏瓣膜病;缺铁性贫血;颈动脉硬化;下肢动脉粥样硬化;胸膜疾患;小叶中心性肺气肿	好转	叶菡洋	叶菡洋	金怡	骨髓活组织检查;骨髓穿刺术
1569	C11肾内科	2023-04-22	2023-05-06	3362895	王美英	女	76Y	高血压性肾衰竭	慢性肾脏病5期;血液透析;胆囊切除术后状态;骨折治疗后恢复期;腔隙性脑梗死;继发性甲状腺功能减退症;骨质疏松;慢性胆囊炎;肺部感染;痛风	好转	郑育	黄文	黄文
1570	C11肾内科	2023-05-09	2023-05-10	3364865	林鹤群	男	50Y	2型糖尿病性肾病	脂肪肝;前列腺结石;取除骨折内固定装置;慢性乙型病毒性肝炎;2型糖尿病性视网膜病变;2型糖尿病性周围神经病;2型糖尿病性周围血管病变;高血压病;肩周炎;2型糖尿病性心肌病;颈椎间盘突出;下肢动脉粥样硬化;颈动脉硬化;慢性缺血性小肠炎	未愈	郑育	施珍	施珍
1571	C11肾内科	2023-05-09	2023-05-10	3364869	王小琴	女	78Y	结缔组织病肺间质纤维化	高血压病;后天性肾囊肿;纤维囊性乳腺病;甲状腺结节;多处挫伤;小腿撕脱伤;肱骨骨折	好转	周志宏	张益前	潘敏
1572	C11肾内科	2023-05-13	2023-05-14	3366334	黄明忠	男	69Y	肾病综合征，膜性肾病	慢性肾脏病4期;颈动脉硬化;下肢动脉粥样硬化;骨折治疗后恢复期;自身免疫病;高血压病;2型糖尿病性视网膜病变;带状疱疹累及特指神经系统;前列腺结石;前列腺增生;痛风;特指手术后状态	好转	叶菡洋	叶菡洋	金怡
1573	C11肾内科	2023-05-16	2023-05-20	3368504	黄冬菜	女	63Y	类风湿性关节炎伴肺间质纤维化	肾结石;腔隙性脑梗死;子宫平滑肌瘤;冠状动脉粥样硬化性心脏病;食管炎;慢性胃炎;胆囊炎;骨质疏松;胸椎骨折;股骨头无菌性坏死	好转	周志宏	张益前	潘敏
1574	C11肾内科	2023-05-20	2023-05-23	3369945	金卡善	女	60Y	强直性脊柱炎	膝关节炎;桡骨下端骨折;高血压病;2型糖尿病;骨质疏松;脂肪肝	好转	叶菡洋	叶菡洋	金怡
1575	C11肾内科	2023-05-24	2023-05-25	3371102	陈云	女	48Y	多发性大动脉炎	慢性肾衰竭;颈动脉硬化;轻度贫血;肾血管性高血压;陈旧性肋骨骨折;腹主动脉狭窄;高脂血症	好转	周志宏	张益前	潘敏
1576	C11肾内科	2023-05-22	2023-06-04	3374753	郑大英	女	61Y	人工动静脉瘘狭窄	慢性肾脏病5期;心房扩大;二尖瓣反流;血液透析;骨折治疗后恢复期;甲状腺功能减退症;肺动脉高压中度;原发性肺动脉高压;2型糖尿病;心脏瓣膜病;主动脉（瓣）关闭不全	治愈	郑育	黄文	施珍	动静脉造瘘后球囊扩张（用于肾透析）;股静脉穿刺置管术;为肾透析的动静脉造瘘术
1577	C11肾内科	2023-05-29	2023-06-11	3377397	黄定妹	女	81Y	导管相关性感染	慢性肾脏病5期;颈动脉硬化;闭塞性周围动脉粥样硬化;下肢动脉粥样硬化;膝关节病;血液透析;具有心脏起搏器;骨折治疗后恢复期;高血压病;肝硬化;肋骨骨折;骨质疏松;下肢静脉血栓形成	好转	李占园	陈琰	徐晓燕2
1578	C11肾内科	2023-06-12	2023-06-13	3378473	王小琴	女	78Y	结缔组织病肺间质纤维化	后天性肾囊肿;纤维囊性乳腺病;膝关节病;高血压病;肱骨骨折;甲状腺结节;特指手术后状态	好转	陈辉乐	陈辉乐	黄文文
1579	C11肾内科	2023-06-13	2023-06-14	3378926	林鹤群	男	50Y	2型糖尿病性肾病	颈动脉硬化;下肢动脉粥样硬化;关节周炎;颈椎间盘突出;2型糖尿病性周围血管病及坏疽;肠急性血管疾患;高血压病;2型糖尿病性周围神经病;2型糖尿病性视网膜病变;慢性乙型病毒性肝炎;肺结核瘤;取除骨折内固定装置;前列腺结石;脂肪肝;心肌病	好转	郑育	施珍	施珍
1580	C11肾内科	2023-06-12	2023-06-17	3379759	卓桂英	女	74Y	类风湿性关节炎	后天性肾囊肿;颈动脉硬化;下肢动脉粥样硬化;原发性双侧膝关节病;骨质疏松伴有病理性骨折;胸椎间盘突出;腰椎退行性病变;高血压病;脂肪肝	好转	王红	王红	金怡
1581	C11肾内科	2023-06-17	2023-06-18	3380579	陈旺弟	女	75Y	类风湿性关节炎	骨质疏松伴有病理性骨折;腰椎间盘突出;颈椎间盘突出;腰椎退行性病变;颈椎退行性病变;2型糖尿病	好转	王红	王红	金怡
1582	C11肾内科	2023-06-25	2023-06-26	3384137	陈云	女	48Y	大动脉炎	慢性肾功能不全;手术后状态，其他特指的;肾挛缩;动脉的动脉粥样硬化，其他的;肾性贫血;肾血管性高血压;陈旧性肋骨骨折;下肢深静脉血栓形成;腹主动脉狭窄;高脂血症	好转	陈辉乐	陈辉乐	黄文文
1583	C11肾内科	2023-06-21	2023-06-27	3384231	潘亦仁	男	44Y	膜性肾病	慢性乙型病毒性肝炎;陈旧性肋骨骨折;肺部结节;颈动脉硬化	好转	陈辉乐	陈辉乐	黄文文	肾穿刺活组织检查
1584	C11肾内科	2023-05-29	2023-06-28	3384824	周瑞凤	女	72Y	2型糖尿病肾病V期	高血压性肾衰竭;肾上腺肿瘤;股骨骨折;冠状动脉粥样硬化性心脏病;慢性肾脏病5期;甲状腺术后;下肢动脉粥样硬化;血液透析;心功能Ⅲ级;心房颤动	好转	郑育	潘殊方	潘殊方	颈内静脉穿刺中心静脉置管术;为肾透析的动静脉造瘘术
1585	C11肾内科	2023-06-06	2023-06-28	3384873	王美英	女	76Y	肺部感染	高血压性肾病;痛风;腰椎压缩性骨折;脊椎松解;胆囊切除术后状态;甲状腺功能减退症，其他特指的;腔隙性脑梗死;慢性胆囊炎;多浆膜腔积液	好转	郑育	施珍	施珍
1586	C11肾内科	2023-06-28	2023-07-01	3385925	周瑞凤	女	72Y	2型糖尿病肾病V期	血液透析;2型糖尿病性肾病;高血压性肾病;冠状动脉粥样硬化性心脏病;骨折术后恢复期;下肢动脉粥样硬化;甲状腺术后;肾上腺良性肿瘤;心房颤动	好转	郑育	潘殊方	潘殊方
1587	C11肾内科	2023-06-24	2023-07-03	3386839	董金林	男	78Y	梗阻性肾病	慢性肾功能不全;泌尿道感染;高血压;2型糖尿病;肾结石;后天性肾囊肿;痛风;肱骨骨折;腔隙性脑梗死;脂肪肝;肝囊肿;贫血	好转	陈辉乐	陈辉乐	黄文文
1588	C11肾内科	2023-07-03	2023-07-04	3387381	金卡善	女	61Y	强直性脊柱炎	2型糖尿病;高血压;脂肪肝;桡骨远端骨折	好转	王红	王红	金怡
1589	C11肾内科	2023-07-11	2023-07-12	3391150	王小琴	女	78Y	结缔组织病肺间质纤维化	高血压;乳房良性肿瘤;肱骨骨折;多处挫伤;小腿撕脱伤;甲状腺结节;后天性肾囊肿	好转	陈辉乐	陈辉乐	黄文文
1590	C11肾内科	2023-07-12	2023-07-15	3392218	林鹤群	男	50Y	2型糖尿病肾病III期	高血压;高脂血症;颈椎间盘突出;慢性乙型病毒性肝炎;陈旧性肺结核;颈动脉硬化;下肢动脉粥样硬化;脂肪肝;前列腺结石;缺血性结肠炎;肩周炎;取除骨折内固定装置	好转	李占园	陈琰	徐晓燕2
1591	C11肾内科	2023-07-19	2023-07-24	3396501	张飞锐	男	52Y	范科尼综合征	慢性肾功能不全;脊椎松解;脑出血后遗症;慢性乙型病毒性肝炎;肝硬化;特发性（原发性）高血压;颈动脉硬化;肺结节病;肋骨多处骨折;胆囊结石	好转	郑育	潘殊方	潘殊方
1592	C11肾内科	2023-07-29	2023-07-30	3399361	陈云	女	48Y	大动脉炎	肾性高血压;手术后状态，其他特指的;陈旧性肋骨骨折;高脂血症;下肢深静脉血栓形成;颈动脉硬化;腹主动脉粥样硬化;肾动脉狭窄;肾性贫血;肾挛缩;慢性肾功能不全	好转	陈辉乐	陈辉乐	黄文文
1593	C11肾内科	2023-07-30	2023-08-01	3400130	王彩华	女	54Y	干燥综合征\[舍格伦\]	脊椎应力性骨折;特发性(原发性)高血压;下肢动脉粥样硬化;肺大疱;腰椎间盘突出;肾结石;肾钙化;甲状腺结节;颈椎退行性病变;胸椎退行性病变;腰椎退行性病变;骨质疏松，其他的;肺的其他疾患	好转	王红	王红	金怡
1594	C11肾内科	2023-07-22	2023-08-05	3402023	高芳柳	女	78Y	高血压心脏和肾脏病伴有肾衰竭	黑变病;甲状腺结节;乳房纤维囊性乳腺病;腰椎骨折L1;陈旧性肋骨骨折;下肢动脉粥样硬化;肾结石;后天性肾囊肿;颈动脉硬化;腰椎间盘突出;脊椎松解;慢性肾脏病4期	好转	李占园	陈琰	徐晓燕2
1595	C11肾内科	2023-07-27	2023-08-12	3404808	陈友琦	男	61Y	2型糖尿病性肾病	肺部感染;导管相关性感染;败血症;特发性(原发性)高血压;颈动脉硬化;肝硬化;肋骨骨折;多发性脑梗死;脱髓鞘性白质脑病;甲状旁腺增生;前臂动静脉瘘栓塞;下肢动脉粥样硬化	好转	戴彩香	戴彩香	戴彩香	血液透析
1596	C11肾内科	2023-08-05	2023-08-13	3405574	季定兰	女	64Y	高血压心脏和肾脏病伴有肾衰竭	慢性肾脏病3期;2型糖尿病;手术后状态，其他特指的;癫痫;脑梗死后遗症;后天性肾囊肿;肾占位性病变;肋骨多处骨折	好转	李占园	陈琰	徐晓燕2
1597	C11肾内科	2023-08-12	2023-08-13	3405771	林鹤群	男	50Y	2型糖尿病肾病V期	2型糖尿病性视网膜病变;2型糖尿病性周围血管病变;特发性(原发性)高血压;高脂血症;颈椎间盘突出;慢性乙型病毒性肝炎;肺结核瘤;颈动脉硬化;下肢动脉粥样硬化;脂肪肝;前列腺结石;缺血性结肠炎;肩周炎;骨折治疗后恢复期	好转	毛朝鸣	郑育	施珍
1598	C11肾内科	2023-07-25	2023-08-22	3409553	王美英	女	76Y	高血压性肾衰竭	慢性肾脏病5期;慢性胆囊炎;胆囊切除术后状态;痛风;脊椎松解;脊椎应力性骨折;多发性脑梗死;甲状腺功能减退症;肺部感染;血液透析	好转	郑育	潘殊方	潘殊方	血液透析
1599	C11肾内科	2023-08-21	2023-08-22	3409797	黄明忠	男	70Y	膜性肾病	2型糖尿病性视网膜病变;特发性(原发性)高血压;痛风;颈动脉硬化;带状疱疹性神经痛;陈旧性脊柱骨折;内痔;前列腺结石;前列腺增生;下肢动脉粥样硬化;肾病综合征;慢性肾功能衰竭氮质血症期;Satoxoshi综合征	好转	陈辉乐	陈辉乐	庄芝芝
1600	C11肾内科	2023-08-17	2023-08-22	3409897	李荷姐	女	81Y	全身性骨关节炎	高血压心脏和肾脏病;肌腱和肌肉损伤;心房过早除极;肝囊肿;后天性肾囊肿;先天性脊柱畸形;肋骨骨折;颈动脉硬化;下肢动脉粥样硬化;下肢动脉粥样硬化闭塞症;下肢肌腱损伤	好转	戴彩香	戴彩香	戴彩香
1601	C11肾内科	2023-08-23	2023-08-26	3411190	黄冬菜	女	63Y	类风湿性关节炎伴肺间质纤维化	骨质疏松，其他的;陈旧性腰椎骨折;手术后随诊检查;胸椎骨折;冠状动脉粥样硬化性心脏病;完全性右束支传导阻滞;股骨头缺血性坏死;腔隙性脑梗死;肾结石;子宫平滑肌瘤;慢性胃炎;食管炎;胆囊炎，其他的	好转	陈辉乐	陈辉乐	庄芝芝
1602	C11肾内科	2023-08-27	2023-08-28	3412570	陈云	女	48Y	大动脉炎	腹主动脉粥样硬化;手术后状态，其他特指的;骨折治疗后恢复期;颈动脉硬化;下肢深静脉血栓形成;高脂血症;肾血管性高血压;慢性肾功能不全;肾挛缩;肾性贫血	好转	陈辉乐	陈辉乐	庄芝芝
1603	C11肾内科	2023-08-20	2023-09-02	3414435	刘银珍	女	77Y	结缔组织病	白细胞疾患;甲状旁腺增生;中度贫血;原发性甲状腺功能减退症;特发性(原发性)高血压;冠状动脉粥样硬化性心脏病;骨质疏松，其他的;腰椎椎管狭窄;腰椎间盘突出;陈旧性腰椎骨折;颈椎病;原发性单侧膝关节病;脂膜炎;老年性脑萎缩	好转	王红	王红	金怡	骨髓活组织检查;骨髓穿刺术
1604	C11肾内科	2023-08-31	2023-09-04	3415262	郑金玉	女	70Y	人工动静脉瘘狭窄	偶发房室性期前收缩;下肢动脉粥样硬化;2型糖尿病性肾病;慢性肾脏病5期;血液透析;2型糖尿病性视网膜病变;2型糖尿病性周围神经病;特发性(原发性)高血压;颈动脉硬化;肋骨多处骨折	好转	郑育	叶菡洋	黄文文	血液透析;下肢静脉造影;动静脉造瘘后球囊扩张(用于肾透析)
1605	C11肾内科	2023-08-30	2023-09-06	3416288	杨爱贞	女	39Y	系统性红斑狼疮	原发性胆汁型肝硬化;慢性胆囊炎;陈旧性桡骨骨折;脂肪肝;胆囊结石	好转	王红	王红	219072	唇活组织检查
1606	C11肾内科	2023-08-29	2023-09-10	3417592	黄定妹	女	81Y	脓毒血症	骨折治疗后恢复期;慢性肾脏病5期;肺部感染;特发性(原发性)高血压;具有心脏起搏器	好转	郑育	叶菡洋	黄文文	血液透析
1607	C11肾内科	2023-09-05	2023-09-11	3418046	董富菊	女	73Y	类风湿性关节炎伴肺间质纤维化	自身免疫性甲状腺炎;痛风;三叉神经痛;视野缺损;下肢动脉粥样硬化;脂肪肝;肺的其他疾患;肺大疱;骨折治疗后恢复期;胆囊切除术后状态	好转	周志宏	张益前	219124
1608	C11肾内科	2023-09-04	2023-09-12	3418557	谭俊生	男	32Y	膜性肾病	痛风;高血压;脂肪肝;陈旧性肋骨骨折;心脏传导阻滞，其他特指的	好转	郑育	叶菡洋	黄文文	肾穿刺活组织检查
1609	C11肾内科	2023-09-11	2023-09-12	3418956	吴彩连	女	70Y	骨质疏松伴有病理性骨折	腰椎压缩性骨折;特发性(原发性)高血压;肺的其他疾患;颈动脉硬化;下肢动脉粥样硬化;肝囊肿;窦性心动过缓	好转	王红	王红	219072
1610	C11肾内科	2023-09-12	2023-09-17	3420331	徐碎媚	女	42Y	骨质疏松伴有病理性骨折	胸椎压缩性骨折;皮肌炎;2型糖尿病;顶骨骨折;高脂血症;颈动脉硬化;脂肪肝;肾结石	治愈	王红	王红	219072
1611	C11肾内科	2023-09-16	2023-09-19	3421430	金卡善	女	61Y	强直性脊柱炎	2型糖尿病;特发性(原发性)高血压;脂肪肝;骨质疏松，其他的;原发性双侧膝关节病;陈旧性桡骨骨折	好转	王红	王红	金怡
1612	C11肾内科	2023-09-18	2023-09-20	3421684	谭俊生	男	32Y	膜性肾病	痛风;特发性(原发性)高血压;脂肪肝;肋骨骨折;心脏传导阻滞，其他特指的	好转	郑育	叶菡洋	黄文文
1613	C11肾内科	2023-08-30	2023-09-21	3422257	王美英	女	76Y	高血压性肾衰竭	高血压;血液透析;上消化道出血;缺血性肠病;慢性胆囊炎;胆囊切除术后状态;多发性脑梗死;甲状腺功能减退症，其他特指的;痛风;脊椎松解;手术后恢复期;腰椎骨折	好转	赵艳玲	黄文	施珍
1614	C11肾内科	2023-09-16	2023-09-23	3422716	郑爱珍	女	54Y	类风湿性关节炎	骨质疏松;骨折治疗后恢复期;肝功能检查的异常结果;高脂血症;脂肪肝;下肢动脉粥样硬化;脊柱侧弯;脾大	好转	王红	王红	219072
1615	C11肾内科	2023-09-23	2023-09-24	3423641	陈旺弟	女	75Y	类风湿性关节炎	2型糖尿病;颈椎间盘突出;骨质疏松，其他的;颈椎退行性病变;腰椎退行性病变;腰椎间盘突出;腰椎压缩性骨折	好转	周志宏	王红	219072
1616	C11肾内科	2023-09-24	2023-09-25	3423812	王小琴	女	78Y	结缔组织病肺间质纤维化	特发性(原发性)高血压;乳房纤维囊性乳腺病;肱骨骨折;手术后状态，其他特指的;原皮回植状态;甲状腺结节;后天性肾囊肿	好转	周志宏	张益前	219124
1617	C11肾内科	2023-09-23	2023-09-25	3423976	夏文星	男	47Y	上腔静脉综合征	慢性肾脏病5期;血液透析;特发性(原发性)高血压;陈旧性锁骨骨折;高脂血症;胆囊息肉;后天性肾囊肿	好转	郑育	叶菡洋	黄文文	上肢静脉造影;动静脉造瘘后球囊扩张(用于肾透析);上腔静脉造影
1618	C11肾内科	2023-09-23	2023-09-27	3424720	季林英	女	75Y	类风湿性关节炎	全身性骨关节炎;脊椎松解;耻骨骨折;脊柱侧弯;脊椎退行性病变;椎间盘移位，其他特指的;特发性(原发性)高血压;高血压性心脏病;心脏瓣膜病;下肢动脉粥样硬化;脂肪肝;肾结石;胆囊息肉;肺大疱;主动脉(瓣)关闭不全	好转	王红	王红	金怡
1619	C11肾内科	2023-09-27	2023-10-03	3427454	陈香珠	女	70Y	骨质疏松伴有病理性骨折	腰椎关节强硬;高血压;颈动脉硬化;结膜炎，其他的;睡眠障碍;慢性胃炎;十二指肠球部息肉;白内障;脊柱侧弯;腰椎间盘突出;紧张型头痛;焦虑状态;锁骨下动脉粥样硬化;下肢动脉粥样硬化	好转	周志宏	张益前	219124
1620	C11肾内科	2023-10-05	2023-10-10	3429459	陈香珠	女	70Y	下肢水肿	骨质疏松，其他的;腰椎关节强硬;特发性(原发性)高血压;病理性骨折，不可归类在他处者;动脉粥样硬化;慢性胃炎;十二指肠球部息肉;结膜炎;白内障;脊柱侧弯;腰椎间盘突出;紧张型头痛;睡眠障碍;焦虑状态	好转	周志宏	张益前	219124
1621	C11肾内科	2023-09-06	2023-10-11	3429978	潘文眉	女	82Y	高血压心脏和肾脏病同时伴有(充血性)心力衰竭和肾衰竭	血液透析;脑梗死后遗症;癫痫;先天性心脏畸形;2型糖尿病;手术后恢复期;股骨骨折;慢性肾脏病5期;代谢性脑病	好转	郑育	叶菡洋	黄文文	血液透析
1622	C11肾内科	2023-10-10	2023-10-11	3430160	董富菊	女	73Y	类风湿性关节炎伴肺间质纤维化	自身免疫性甲状腺炎;甲状腺功能减退症，其他特指的;痛风;三叉神经痛;冠状动脉粥样硬化;脂肪肝;肺的其他疾患;肺大疱;骨折术后恢复期;肱骨远端骨折;胆囊切除术后状态	治愈	周志宏	张益前	庄芝芝
1623	C11肾内科	2023-10-11	2023-10-12	3430650	高艳	女	52Y	强直性脊柱炎	髋关节置换术后;子宫切除术后状态;后天性肾囊肿;陈旧性肺结核;陈旧性肋骨骨折;肾结石	好转	周志宏	张益前	庄芝芝
1624	C11肾内科	2023-10-14	2023-10-15	3431882	赵彩凤	女	60Y	重叠综合征，其他的	高脂血症;脂肪肝;手术后状态，其他特指的;股骨骨折;阑尾炎;系统性红斑狼疮;类风湿性关节炎;间质性肺炎;继发性高血压;下肢动脉粥样硬化;高胆固醇血症	好转	王红	王红	金怡
1625	C11肾内科	2023-10-08	2023-10-21	3434205	金良德	男	61Y	2型糖尿病肾病V期	2型糖尿病;慢性肾脏病5期;为肾透析的动静脉造瘘;特发性(原发性)高血压;高血压性心脏病;骨质疏松;下肢动脉粥样硬化;眶骨骨折	好转	郑育	叶菡洋	黄文文	为肾透析的动静脉造瘘术
1626	C11肾内科	2023-10-25	2023-10-29	3437636	王小琴	女	78Y	结缔组织病	间质性肺病;特发性(原发性)高血压;乳房纤维囊性乳腺病;肱骨骨折;手术后状态，其他特指的;原皮回植状态;甲状腺结节;后天性肾囊肿	好转	周志宏	张益前	庄芝芝
1627	C11肾内科	2023-10-16	2023-11-01	3439204	王爱琴	女	49Y	慢性肾小球肾炎	慢性肾脏病5期;肾性贫血;低钙血症;高磷血症;高尿酸血症;胆囊结石;胆囊息肉;取除骨折内固定装置;泌尿器官诊断性影像检查的异常所见	好转	郑育	叶菡洋	黄文文	为肾透析的动静脉造瘘术
1628	C11肾内科	2023-11-01	2023-11-05	3441033	戴廷松	男	73Y	人工动静脉瘘狭窄	高血压性肾病;慢性肾脏病5期;痛风性肾病;痛风;心尖肥厚型心肌病;肋骨骨折;后天性肾囊肿	好转	郑育	叶菡洋	黄文文	动静脉造瘘后球囊扩张(用于肾透析);上肢静脉造影;血液透析
1629	C11肾内科	2023-11-05	2023-11-06	3441514	周春凤	女	69Y	干燥综合征\[舍格伦\]	骨质疏松伴有病理性骨折;脊椎退行性病变;特发性(原发性)高血压;腔隙性脑梗死;心律失常;心室过早除极;Ⅰ度房室传导阻滞;主动脉钙化;左室肥大;肾错构瘤;肺动脉高压;颈动脉硬化;支气管扩张(症);胆囊结石	好转	王红	王红	金怡
1630	C11肾内科	2023-11-04	2023-11-08	3442345	陈佰青	男	50Y	肾淀粉样变性	特发性(原发性)高血压;肾结石;前列腺增生;骨折治疗后恢复期;前列腺结石	好转	郑育	叶菡洋	黄文文	肾穿刺活组织检查
1631	C11肾内科	2023-10-31	2023-11-11	3443390	杨金香	女	52Y	膜性肾病	肾病综合征,其他的;新型隐球菌败血症;泌尿道感染;类固醇性糖尿病;脂肪肝;肺诊断性影像异常;肝囊肿;肾结石;动脉的动脉粥样硬化，其他的;胸椎压缩性骨折;腰椎退行性病变;肺部感染	好转	戴彩香	戴彩香	戴彩香
1632	C11肾内科	2023-11-08	2023-11-14	3444890	施杰	男	53Y	局灶硬化性肾炎	特发性(原发性)高血压;肾上腺肿物;肾上腺良性肿瘤;低钾血症;慢性胃炎;后天性肾囊肿;肾结石;甲状腺术后;骨折术后恢复期;手术后状态，其他特指的	好转	王红	王红	金怡	肾穿刺活组织检查
1633	C11肾内科	2023-11-13	2023-11-14	3445058	董富菊	女	73Y	类风湿性关节炎伴肺间质纤维化	自身免疫性甲状腺炎;继发性甲状腺功能减退症;特发性(原发性)高血压;三叉神经痛;痛风;下肢动脉粥样硬化;脂肪肝;肺诊断性影像异常;肺大疱;肱骨外科颈骨折;肱骨远端骨折;胆囊切除术后状态	好转	周志宏	张益前
1634	C11肾内科	2023-11-05	2023-11-15	3445356	黄定妹	女	81Y	导管相关性感染	慢性肾脏病5期;血液透析;特发性(原发性)高血压;动脉硬化;具有心脏起搏器;骨折治疗后恢复期	好转	郑育	叶菡洋	黄文文	血液透析
1635	C11肾内科	2023-11-11	2023-11-18	3446386	薛敏	男	65Y	痛风性肾病	痛风;慢性肾功能不全尿毒症期;肾性贫血;肾性骨病;特发性(原发性)高血压;高脂血症;颈动脉硬化;肺诊断性影像异常;肋骨骨折;多发性肝囊肿;后天性肾囊肿;肾结石;前列腺结石;结肠憩室;锁骨下动脉粥样硬化;下肢动脉粥样硬化	治愈	周志宏	张益前	庄芝芝
1636	C11肾内科	2023-11-16	2023-11-18	3446612	赵彩凤	女	60Y	重叠综合征，其他的	类风湿性关节炎伴肺间质纤维化;系统性红斑狼疮;继发性高血压;脂肪肝;高脂血症;甲状腺术后;骨折治疗后恢复期;阑尾术后	好转	王红	金怡
1637	C11肾内科	2023-11-19	2023-11-20	3447395	侯定兴	男	73Y	2型糖尿病肾病V期	2型糖尿病;腹膜透析;支气管扩张(症);特发性(原发性)高血压;骨折治疗后恢复期;手术后状态，其他特指的;后天性肾囊肿;颈动脉硬化;下肢动脉粥样硬化	好转	毛朝鸣	赵艳玲	黄文
1638	C11肾内科	2023-11-18	2023-11-20	3447409	郑爱珍	女	54Y	类风湿性关节炎	骨质疏松;腰椎骨折;高脂血症;脂肪肝;下肢动脉粥样硬化;脊柱侧弯;脾大;后循环缺血	好转	王红	王红
1639	C11肾内科	2023-11-19	2023-11-20	3447660	董玉钗	女	67Y	梗阻性肾病	慢性肾脏病5期;肾性贫血;肾挛缩;肾结石;特发性(原发性)高血压;甲状腺恶性肿瘤个人史;骨折治疗后恢复期	好转	郑育	叶菡洋	黄文文	上肢血管切开探查术
1640	C11肾内科	2023-11-24	2023-11-28	3450942	黄冬菜	女	63Y	类风湿性关节炎伴肺间质纤维化	肺动脉高压;骨质疏松;腰椎压缩性骨折;胸椎骨折;完全性右束支传导阻滞;骨坏死;冠状动脉粥样硬化性心脏病;腔隙性脑梗死;肾结石;子宫平滑肌瘤;慢性胃炎;食管炎;胆囊炎，其他的	好转	张益前	张益前
1641	C11肾内科	2023-11-14	2023-11-30	3452059	王美英	女	76Y	人工动静脉瘘血栓形成	高血压性肾病;血液透析;慢性胆囊炎;甲状腺功能减退症，其他特指的;痛风;骨质疏松;腰椎压缩性骨折;多发性脑梗死;高血压	治愈	毛朝鸣	赵艳玲	施珍	动静脉造瘘后球囊扩张(用于肾透析);下肢静脉造影;下肢动脉溶栓术;动静脉造瘘后球囊扩张(用于肾透析);下肢静脉置管溶栓术;下肢静脉造影
1642	C11肾内科	2023-12-04	2023-12-05	3454281	金卡善	女	61Y	强直性脊柱炎	2型糖尿病;特发性(原发性)高血压;单侧膝关节骨性关节病;骨质疏松;脂肪肝;桡骨远端骨折	好转	郑淑蓓	郑淑蓓	郑群
1643	C11肾内科	2023-12-19	2023-12-20	3460814	董富菊	女	73Y	类风湿性关节炎伴肺间质纤维化	自身免疫性甲状腺炎;继发性甲状腺功能减退症;特发性(原发性)高血压;低钾血症;痛风;三叉神经痛;下肢动脉粥样硬化;脂肪肝;肺的其他疾患;肺大疱;肱骨外科颈骨折;肱骨远端骨折;胆囊切除术后状态	好转	毛朝鸣	张益前	庄芝芝
1644	C11肾内科	2023-12-20	2023-12-23	3461688	赵彩凤	女	60Y	系统性红斑狼疮，累及器官或系统	类风湿性关节炎;继发性高血压;脂肪肝;高脂血症;恶性肿瘤手术后的随诊检查;骨折术后恢复期;阑尾炎	好转	毛朝鸣	郑淑蓓	郑群
1645	C11肾内科	2023-12-05	2023-12-24	3462400	汪丐洪	男	68Y	2型糖尿病性肾病	高血压心脏和肾脏病;冠状动脉粥样硬化性心脏病;颈动脉硬化;骨折治疗后恢复期	好转	李占园	潘敏	潘敏
1646	C11肾内科	2023-12-21	2023-12-24	3462414	黄和平	女	66Y	2型糖尿病性肾病	骨折术后恢复期;肾结石;下肢动脉粥样硬化;甲状腺结节;肺结节病;肾性贫血;慢性肾脏病5期	好转	李占园	潘敏	潘敏
1647	C11肾内科	2023-12-26	2023-12-30	3465028	吕包洲	男	63Y	腹膜透析	慢性肾小球肾炎;高磷血症;继发性甲状旁腺功能亢进症，不可归类在他处者;腰椎压缩性骨折;骨质疏松;腰椎间盘突出;脊椎退行性病变;肝炎后肝硬化;湿疹;颈动脉硬化;下肢动脉粥样硬化;后天性肾囊肿;前列腺增生;肾性高血压;肾性贫血	其他	李占园	潘敏	潘敏	腹膜透析
1648	D06(ICU)	2022-12-27	2023-01-01	3314318	孙定镐	男	81Y	创伤性急性硬膜下出血	高血压病;2型糖尿病;颈椎椎管狭窄;肺空洞;创伤性脑疝;创伤性蛛网膜下腔出血;枕骨骨折;头皮血肿;脑挫伤;肾衰竭;颈椎间盘突出;颈椎退行性病变;多发性肋骨骨折;肺部感染	死亡	程碧环	王瑞丽	王瑞丽	深静脉穿刺;脑膜切开伴硬脑膜下腔血肿清除术;有创呼吸机治疗大于等于96小时;皮肤和皮下坏死组织切除清创术;颅骨钻孔减压术
1649	D06(ICU)	2022-12-03	2023-01-01	3314322	董文余	男	82Y	重症肺炎	椎间盘膨隆;腰椎间盘退行性病变;腰骶椎间盘突出;陈旧性腰椎骨折;应力性骨折;高血压病;心房颤动;呼吸衰竭;间质性肺病	未愈	龚裕强	郭献阳	郭献阳	气管插管;深静脉穿刺
1650	D06(ICU)	2022-12-15	2023-01-02	3314724	郑梅妹	女	90Y	重症肺炎	急性肾衰竭;心功能不全;股骨颈骨折;2型糖尿病;中度贫血;下肢静脉血栓形成;下肢假性动脉瘤;呼吸衰竭	未愈	程碧环	陈如杰	陈如杰	人工股骨头置换术;血液净化;髋关节滑膜切除术;支气管镜下肺泡灌洗术（BAL）;气管插管
1651	D06(ICU)	2022-12-10	2023-01-03	3315023	冯岩贤	男	85Y	肺部感染	髌骨骨折;肩胛骨骨折;肩关节脱位;高血压病;腔隙性脑梗死;老年性脑萎缩;胆囊结石;肱骨头骨折;呼吸衰竭;股骨骨折	未愈	龚裕强	魏大臻	魏大臻	股骨骨折切开复位钢板内固定术;髌骨骨折切开复位张力带钢丝内固定术;关节软骨修复术
1652	D06(ICU)	2023-01-07	2023-01-07	3316759	朱宗权	男	84Y	小腿挤压伤	失血性休克;开放性多发性损伤;呼吸心跳骤停;骨盆骨折;腰椎骨折;心脏停搏复苏成功	好转	程碧环	谢媚媚	谢媚媚	有创呼吸机治疗小于96小时;心肺复苏;膝关节离断术
1653	D06(ICU)	2023-01-12	2023-01-13	3318781	潘时嘉	男	39Y	颅内损伤伴长时间昏迷	创伤性脑疝;创伤性硬膜下出血;多发性颅骨骨折;创伤性脑血肿;失血性休克;酸中毒;特指电解质和液体平衡紊乱;肋骨骨折;肝钙化灶;胰腺囊肿;肾结石;创伤性蛛网膜下腔出血;中枢性呼吸衰竭;头皮血肿;多发性胸椎骨折;凝血障碍	未愈	龚裕强	龚裕强	李忠旺	颅骨钻孔减压术;脑膜切开伴硬脑膜下腔血肿清除术
1654	D06(ICU)	2023-01-08	2023-01-16	3320251	罗何拉服	男	19Y	颅内损伤伴长时间昏迷	创伤性蛛网膜下腔出血;创伤性脑疝;创伤性硬膜下出血;呼吸衰竭;颅骨骨折;肺挫伤;耻骨骨折;创伤性气胸;骶骨骨折	死亡	龚裕强	郭献阳	郭献阳	颅骨钻孔减压术;脑膜切开伴硬脑膜下腔血肿清除术
1655	D06(ICU)	2023-01-18	2023-01-21	3322135	徐银光	男	61Y	创伤性蛛网膜下腔出血	贫血;颞骨骨折;顶骨骨折;创伤性硬膜下出血;脑疝;脑挫伤;弥漫性轴索损伤;颈椎间盘突出;陈旧性肋骨骨折;肺部感染;2型糖尿病;胸腔积液;低蛋白血症	未愈	龚裕强	林孟相	林孟相	脑膜切开伴硬脑膜下腔血肿清除术;颅骨钻孔减压术
1656	D06(ICU)	2023-01-19	2023-01-26	3324434	陈星云	男	70Y	创伤性蛛网膜下腔出血	面骨骨折;胸腔积液;肩胛骨骨折;颈椎骨折;腰椎骨折;心脏骤停;尿毒症;多囊肾;多囊肝;腔隙性脑梗死;多发性肋骨骨折;腹水;胸椎骨折;多囊脾;肾结石;失血性休克;脑挫伤;创伤性硬膜下出血;额骨骨折	死亡	庄荣	郭献阳	郭献阳	心肺复苏;深静脉穿刺;气管插管
1657	D06(ICU)	2023-01-15	2023-01-30	3326293	夏其德	男	90Y	感染性休克	创伤性膀胱破裂;尿道损伤;前列腺增生;腹膜炎;肾衰竭;脂肪肝;胆囊结石;多发性脑梗死;高血压病;后天性肾囊肿;肺部感染;呼吸衰竭;老年性脑萎缩;肾结石;股骨粗隆间骨折	未愈	龚裕强	林孟相	陈如杰	支气管镜下肺泡灌洗术（BAL）;剖腹探查术;膀胱镜检查;股骨骨折闭合复位髓内针内固定术;膀胱修补术;经尿道膀胱镜膀胱血块清除术;股骨人工骨植骨术;深静脉穿刺
1658	D06(ICU)	2023-02-02	2023-02-04	3328902	林天山	男	53Y	创伤性脑出血	冠状动脉粥样硬化;颅骨骨折;主动脉钙化;后天性肾囊肿;创伤性胸腔积液;脑挫伤	未愈	龚裕强	张晓隆	张晓隆	颅骨钻孔减压术;脑内血肿清除术;有创呼吸机治疗小于96小时
1659	D06(ICU)	2023-01-24	2023-02-04	3328937	陈光银	男	81Y	肺部感染	肺动脉高压中度;股骨粗隆间骨折;多器官功能障碍综合征(MODS);心脏停搏复苏成功;特指肾盂积水;胸腔积液;胃恶性肿瘤;脑继发恶性肿瘤;肺继发恶性肿瘤;腹膜继发恶性肿瘤;高血压病;心房颤动;老年性脑萎缩;颈动脉硬化	好转	龚裕强	张晓隆	张晓隆	有创呼吸机治疗小于96小时;股骨骨折闭合复位髓内针内固定术
1660	D06(ICU)	2023-01-28	2023-02-04	3328947	张松普	男	50Y	颅内损伤伴长时间昏迷	心脏骤停;休克;创伤性脑疝;脑挫伤;创伤性蛛网膜下腔出血;枕骨骨折;急性肾衰竭;高钾血症;创伤性硬膜下出血;头皮血肿;肺气肿;肺炎;肾结石	死亡	龚裕强	张文武	张文武	颅骨钻孔减压术;脑膜切开伴硬脑膜下腔血肿清除术;深静脉穿刺
1661	D06(ICU)	2023-01-11	2023-02-10	3329601	李昌妹	女	83Y	重症肺炎	冠状动脉粥样硬化性心脏病;肋骨骨折;后天性肾囊肿;胆囊结石;下肢动脉粥样硬化;颈动脉硬化;呼吸衰竭;肺部感染;支气管哮喘，非危重;心功能Ⅳ级;心房颤动;高血压病;慢性肾衰竭;脑梗死后遗症	好转	庄荣	陈德准	陈德准	有创呼吸机治疗小于96小时
1662	D06(ICU)	2023-01-10	2023-02-15	3331344	夏荣庚	男	64Y	胫腓骨闭合性骨折	慢性胃炎;腔隙性脑梗死;输尿管结石;肾结石;肾错构瘤;下肢动脉粥样硬化;胃十二指肠溃疡伴出血;慢性失血性贫血;失血性休克;急性肾衰竭;肺部感染;急性脑病综合征;食管炎	好转	庄荣	庄荣	庄荣	胫骨外固定架固定术;胫骨骨折切开复位钢针内固定术;皮肤和皮下坏死组织切除清创术
1663	D06(ICU)	2023-03-09	2023-03-14	3341845	胡恩波	男	67Y	创伤性急性硬膜下出血	肋骨骨折;肺部感染;贫血;甲状腺肿物;后天性肾囊肿;颅内损伤;颅底骨骨折;失血性休克;颅腔积气;头皮血肿;创伤性蛛网膜下腔出血	未愈	庄荣	李忠旺	李忠旺	颅内血肿清除术;颅骨钻孔减压术
1664	D06(ICU)	2023-03-26	2023-04-02	3349824	王哲益	男	62Y	创伤性硬膜下出血	肺部感染;下肢静脉血栓形成;后天性肾囊肿;急性肾衰竭;胆囊结石;多发性肝囊肿;多处挫伤;头皮血肿;肺挫伤;创伤性脑疝;创伤性蛛网膜下腔出血;脑挫伤;跖骨骨折;锁骨骨折;肋骨骨折;颞骨骨折;枕骨骨折;额骨骨折;肝功能异常	未愈	庄荣	庄荣	傅蓓蓓	呼吸机治疗[大于等于96小时];连续性肾脏替代治疗[CRRT];颅内血肿清除术;颅骨钻孔减压术
1665	D06(ICU)	2023-04-06	2023-04-11	3353274	郑爱珠	女	81Y	肺部感染	慢性阻塞性肺病伴急性加重;高血压病;股骨粗隆间骨折;肝囊肿;胸腔积液;肺气肿;慢性支气管炎;心功能不全	未愈	程碧环	陈德准	陈德准
1666	D06(ICU)	2023-03-28	2023-04-11	3353334	郑顺龙	男	81Y	2型糖尿病性肾病	高血压性心脏病肾脏病伴心力衰竭和肾功能衰竭;2型糖尿病性肾病;继发性血小板减少;骨折畸形愈合;前列腺结石;胰管扩张;多浆膜腔积液;腹股沟斜疝;肺部感染;气胸;肺大泡;肺气肿;单纯性肾囊肿;肾结石;慢性肾脏病5期;胃粘膜肥厚;颈动脉硬化	未愈	程碧环	魏大臻	魏大臻	胸腔穿刺术;气管内插管;连续性肾脏替代治疗[CRRT]
1667	D06(ICU)	2023-04-10	2023-04-12	3353454	金德生	男	74Y	创伤性硬膜下出血	创伤性蛛网膜下腔出血;脑挫伤;颞骨骨折;枕骨骨折;肺大泡;多处浅表损伤;急性肾衰竭;颅内损伤伴长时间昏迷;颈椎退行性病变;肺挫伤;创伤性脑疝	未愈	庄荣	王本极	王本极	呼吸机治疗[小于96小时];颅内血肿清除术;颅骨钻孔减压术
1668	D06(ICU)	2023-03-22	2023-04-20	3356988	吴玉英	女	80Y	胰腺恶性肿瘤	急性肾衰竭;多器官功能障碍综合征(MODS);冠状动脉支架植入后状态;全身性广泛继发恶性肿瘤;心功能Ⅲ级;心房颤动;心脏停搏复苏成功;高血压病;2型糖尿病;胸椎骨折;呼吸衰竭;糜烂性胃炎;冠状动脉粥样硬化性心脏病;高钾血症;代谢性酸中毒	其他	龚裕强	李忠旺	李忠旺	心肺复苏;暂时性气管切开术
1669	D06(ICU)	2023-03-08	2023-04-22	3357650	柯蕊芬	女	74Y	呼吸心跳骤停	帕金森综合征;双相性情感障碍;缺氧缺血性脑病;心脏停搏复苏成功;2型糖尿病;股骨骨折;皮疹;昏迷;肺部感染;硬脑膜下积液;恶性肿瘤手术后随诊检查	未愈	龚裕强	陈如杰	陈如杰	静脉穿刺术;股骨植骨术;股骨骨折闭合复位螺钉内固定术
1670	D06(ICU)	2023-04-19	2023-04-25	3359008	潘秀媚	女	53Y	创伤性蛛网膜下腔出血	颈部特指损伤;创伤性硬膜下出血;创伤性硬膜外出血;颈椎间盘突出;头皮血肿;肺挫伤;创伤性脑疝;枕骨骨折;呼吸衰竭;腰椎峡部裂	其他	龚裕强	张文武	张文武	颅骨钻孔减压术;颅内血肿硬通道穿刺引流术
1671	D06(ICU)	2023-03-26	2023-04-26	3359591	林美娇	女	78Y	肺部感染	骨质疏松;肾衰竭;胸腔积液;心肌病;冠状动脉粥样硬化;陈旧性肺结核;特指手术后状态;肺不张;腔隙性脑梗死;心功能Ⅲ级;高血压病;2型糖尿病;胸椎骨折;呼吸衰竭	其他	庄荣	王本极	王本极	胸椎骨折切开复位内固定术;呼吸机治疗[大于等于96小时];椎弓根钉内固定术
1672	D06(ICU)	2023-04-23	2023-04-29	3360720	季美叶	女	65Y	创伤性蛛网膜下腔出血	颞骨骨折;脂肪肝;肺部感染;高钠血症;创伤性硬膜下出血;蝶骨骨折;多器官功能障碍综合征(MODS);神经源性休克;头皮血肿;创伤性脑疝;脑挫伤	死亡	程碧环	陈德准	陈德准	颅内血肿清除术;呼吸机治疗[大于等于96小时];颅骨钻孔减压术
1673	D06(ICU)	2023-05-18	2023-05-23	3370761	陈冬妹	女	82Y	急性冠脉综合征	心力衰竭;高血压;股骨粗隆间骨折;肺部感染	好转	龚裕强	陈如杰	陈如杰	股骨骨折切开复位髓内针内固定术
1674	D06(ICU)	2023-04-25	2023-05-30	3373177	叶志洛	男	53Y	肺部感染	颈椎骨折C6;急性不完全性四肢瘫;颈椎椎管狭窄;心脏停搏复苏成功;颈部脊髓损伤;胫骨骨折;第一颈椎骨折;急性肾衰竭;颈椎脱位C5/C6	好转	龚裕强	张文武	张文武	颈椎脱位切开复位内固定术;颈后入路寰枢椎复位内固定术;颈椎后路单开门椎管减压术
1675	D06(ICU)	2023-05-10	2023-06-02	3374496	陈春池	男	51Y	创伤性硬膜下出血	创伤性蛛网膜下腔出血;额骨骨折;肝功能不全;脂肪肝;肺部感染;胸腔积液;后天性肾囊肿;肋骨多处骨折;心脏停搏复苏成功;肺挫伤;创伤性脑疝	未愈	庄荣	王本极	王本极	颅骨钻孔减压术;呼吸机治疗[大于等于96小时];颅内血肿清除术
1676	D06(ICU)	2023-06-03	2023-06-04	3375104	郑鸿飞	男	81Y	创伤性硬膜下出血	额骨和顶骨骨折;失血性休克;头皮血肿;创伤性脑疝;创伤性蛛网膜下腔出血;颞骨骨折;贫血;代谢性酸中毒	死亡	龚裕强	张文武	李慧3	颅骨钻孔减压术;颅内血肿清除术
1677	D06(ICU)	2023-06-01	2023-06-06	3376145	阮冬菊	女	80Y	肺部感染	肋骨多处骨折;下肢动脉粥样硬化;高血压;胆囊结石;股骨干骨折;肝囊肿;胸腔积液	好转	程碧环	陈德准	陈德准	股骨骨折切开复位钢板内固定术
1678	D06(ICU)	2023-06-17	2023-06-18	3380464	王志余	男	80Y	开放性多发性骨盆骨折	股动脉损伤;急性肾衰竭;失血性休克;肋骨多处骨折;多发性脑梗死;缺氧缺血性脑病;多处挫伤;股骨骨折;阻塞性肺气肿	未愈	龚裕强	陈如杰	陈如杰	大腿截断术;骨盆钢针内固定术;经导管髂内动脉栓塞术;髂外动脉球囊扩张成形术;盆骨外固定术
1679	D06(ICU)	2023-06-16	2023-07-02	3386697	许昌界	男	92Y	小肠穿孔	肺部阴影;单纯性肾囊肿;耻骨骨折;胸椎退行性病变;腰椎退行性病变;额骨骨折;头皮血肿;腔隙性脑梗死;老年性脑萎缩;胸腔积液;踝关节骨折;踝和足神经损伤;跖骨骨折;腓骨头骨折;尺骨茎突骨折;骨盆骨折;多处开放性伤口;肺部感染;腹腔积液	治愈	庄荣	庄荣	李慧3	创面封闭式负压引流术（VSD）;皮肤和皮下坏死组织切除清创术;手肌腱、血管、神经探查术;足关节囊缝合术;手部肌肉清创术;下肢关节囊缝合术;桡动脉修补术;下消化道造影;开放性骨折部位的清创术;腹腔冲洗检查;肠穿孔修补术
1680	D06(ICU)	2023-04-02	2023-07-04	3387396	林日伟	男	42Y	肺部感染	股骨骨折;髋关节脱位;甲癣;暴露性角膜炎;特发性（原发性）高血压;脑出血后遗症;股骨头无菌性坏死	好转	龚裕强	龚裕强	胡建坚
1681	D06(ICU)	2023-07-19	2023-07-20	3395083	陈景巨	男	72Y	心肌梗死	股骨粗隆间骨折;特发性（原发性）高血压;盲，双眼;2型糖尿病;呼吸衰竭;心源性休克	未愈	程碧环	程碧环	胡建坚	暂时性气管切开术
1682	D06(ICU)	2023-07-03	2023-07-22	3395795	何升光	男	59Y	急性肺栓塞	截断术残端的坏死;多脏器损伤;呼吸心跳骤停;腘动脉栓塞;心脏停搏复苏成功;截断术残端的感染;肋骨骨折;腘动脉损伤;腓总神经损伤;腘窝开放性损伤;头皮血肿;开放性损伤伴感染;特发性（原发性）高血压;股骨髁骨折;股四头肌肌肉损伤;失血性休克	未愈	程碧环	戴凌燕	戴凌燕	残端皮肤修整术;腿筋膜松解术;腘动脉缝合术;大腿截断术;其他下肢关节囊或韧带缝合术;股四头肌缝合术;创面封闭式负压引流术（VSD）;皮肤和皮下坏死组织切除清创术;肌腱、血管、神经探查术;连续性肾脏替代治疗[CRRT];呼吸机治疗[小于96小时]
1683	D06(ICU)	2023-07-22	2023-07-26	3397756	刘爱琴	女	66Y	胸椎继发恶性肿瘤	重度贫血;失血性休克;乳腺恶性肿瘤;肿瘤性病理性骨折;胸椎椎管狭窄	未愈	庄荣	魏大臻	魏大臻	胸椎植骨术;呼吸机治疗[小于96小时];胸椎病损切除术
1684	D06(ICU)	2023-07-29	2023-07-30	3399474	范建国	男	48Y	弥散性血管内凝血	下肢肌腱损伤;脊髓损伤;腹水;陈旧性肋骨骨折;心脏停搏复苏成功;慢性呼吸衰竭;多脏器功能衰竭;挤压综合征;失血性休克;开放性胫腓骨干骨折;下肢血管的损伤;皮肤挫伤;下肢神经的损伤	死亡	龚裕强	郭献阳	郭献阳	心肺复苏
1685	D06(ICU)	2023-06-29	2023-08-02	3400892	卢庆珍	男	63Y	颈椎骨折	头皮裂伤;单纯性肾囊肿;颈部脊髓损伤;颈椎半脱位;四肢瘫痪;颈椎关节交锁;肺部感染;呼吸衰竭	好转	龚裕强	郭献阳	张文武	前入路颈椎间盘切除术;气管内插管;颈椎植骨术;前入路颈椎融合术
1686	D06(ICU)	2023-08-03	2023-08-08	3403563	王艳丽	女	42Y	脓毒血症	感染性休克;高血压;下肢软组织感染;下肢皮肤缺损;类风湿性关节炎;陈旧性肋骨骨折;急性肾功能不全;2型糖尿病;坏疽，不可归类在他处者	好转	张晓隆	张晓隆	张晓隆
1687	D06(ICU)	2023-08-08	2023-08-11	3405293	向松涛	男	36Y	创伤性硬膜下出血	创伤性蛛网膜下腔出血;创伤性脑损伤;创伤性脑疝;颅骨骨折;头皮血肿;中枢性呼吸衰竭	死亡	程碧环	王瑞丽	王瑞丽	颅内血肿清除术;呼吸机治疗[小于96小时];颅骨钻孔减压术
1688	D06(ICU)	2023-07-26	2023-08-19	3408423	刘华弟	女	79Y	大腿开放性伤口	大腿血管损伤;在大腿水平的其他和未特指的肌肉和肌腱损伤;心功能不全;支气管扩张(症);输尿管结石;跟骨骨折;截断术残端的感染;创伤性肛门裂伤;急性冠脉综合征;大腿神经损伤;肺部感染;特发性(原发性)高血压;多囊肾;失血性休克	未愈	庄荣	魏大臻	魏大臻	皮瓣修整术;气管内插管;呼吸机治疗[大于等于96小时];静脉穿刺术;肛门成形术;大腿截断术;肛门皮肤和皮下组织非切除性清创;创面封闭式负压引流术（VSD);会阴成形术
1689	D06(ICU)	2023-08-12	2023-08-26	3411587	黄友名	男	57Y	创伤性蛛网膜下腔出血	创伤性硬膜下出血;创伤性硬脑膜外出血;颞骨骨折;创伤性脑疝;脑挫伤;肩胛骨骨折;肋骨骨折;创伤性皮下气肿;液气胸;创伤性湿肺;肺部感染;肺不张;前列腺增生;前列腺钙化灶;蝶骨骨折;颧骨骨折	死亡	程碧环	王瑞丽	王瑞丽	呼吸机治疗[大于等于96小时];胸腔闭式引流术;颅骨钻孔减压术;颅内血肿清除术
1690	D06(ICU)	2023-09-05	2023-09-06	3416363	黄连妹	女	58Y	开放性股骨下端骨折	重度贫血;多处开放性伤口;股骨骨折;骨盆骨折;下肢皮肤套脱伤;手多发浅表损伤;多处浅表损伤;腹部、下背和骨盆多处浅表损伤	死亡	庄荣	魏大臻	魏大臻	股动脉穿刺部位封堵术;髂动脉栓塞术;股骨骨折开放性复位术伴内固定;静脉穿刺术;呼吸机治疗[小于96小时]
1691	D06(ICU)	2023-09-05	2023-09-16	3420220	张东磊	男	40Y	耻骨分支骨折	踝关节骨折;胸椎骨折;肋骨骨折;创伤性蛛网膜下腔出血;肺挫伤;胸腔积液;后天性肾囊肿;肾肿物;腰骶椎骨骨折;腰椎椎管狭窄	好转	龚裕强	郭献阳	郭献阳	髂动脉栓塞术;腹主动脉造影
1692	D06(ICU)	2023-09-06	2023-09-16	3420242	郭新芳	男	65Y	创伤性蛛网膜下腔出血	创伤性硬膜下出血;颞骨骨折;创伤性湿肺;肺部感染;下肢静脉血栓形成;慢性乙型病毒性肝炎;头皮挫伤	未愈	庄荣	林孟相	林孟相	颅内血肿清除术;颅骨去骨瓣减压术
1693	D06(ICU)	2023-09-16	2023-09-19	3421454	许美凤	男	52Y	颈部脊髓损伤	颈椎骨折;颈椎滑脱;肺部感染;呼吸衰竭;肺大疱;多发性脑梗死;肝功能不全;肾功能不全	好转	程碧环	王本极	王本极	呼吸机治疗[大于等于96小时];气管内插管
1694	D06(ICU)	2023-09-23	2023-09-26	3424545	罗森	男	23Y	创伤性蛛网膜下腔出血	创伤性颅内积气;颞骨骨折;创伤性脑疝;创伤性硬膜下出血;创伤性湿肺;手指挫伤	死亡	程碧环	陈建时	陈建时	颅骨去骨瓣减压术;颅内血肿清除术
1695	D06(ICU)	2023-09-28	2023-09-29	3425935	彭冬根	男	46Y	创伤性蛛网膜下腔出血	创伤性颅内积气;额骨骨折;肩胛骨骨折;肾挫伤;肺挫伤;胆囊结石;颈椎退行性病变;颞骨骨折;颧弓骨折;上颌骨骨折;蝶骨骨折;创伤性硬膜下出血;创伤性脑损伤;创伤性脑疝	死亡	龚裕强	程碧环	胡建坚	经导管椎动脉栓塞术;心肺复苏;脑血管造影
1696	D06(ICU)	2023-09-23	2023-09-30	3426990	徐庄妹	男	59Y	创伤性蛛网膜下腔出血	肾挫伤;肺部感染;创伤性脑疝;慢性呼吸衰竭;尿崩症;创伤性脑损伤;创伤性硬膜下出血;创伤性硬脑膜外出血;颅内损伤伴有延长的昏迷;枕骨骨折;头皮血肿;肺挫伤	死亡	龚裕强	陈如杰	陈如杰	颅骨去骨瓣减压术;颅内血肿清除术
1697	D06(ICU)	2023-09-28	2023-10-01	3427264	麻茂琴	男	60Y	创伤性蛛网膜下腔出血	颅内损伤伴有延长的昏迷;创伤性硬膜下出血;创伤性脑疝;颞骨骨折;头皮血肿;创伤性胸腔积液;胸椎横突骨折;颈椎间盘突出	未愈	程碧环	王瑞丽	王瑞丽	颅骨去骨瓣减压术;呼吸机治疗[小于96小时];颅内血肿清除术
1698	D06(ICU)	2023-09-27	2023-10-07	3428454	沈必根	男	66Y	拇指完全切断	2型糖尿病伴有并发症;手术后状态，其他特指的;2型糖尿病足;肺部感染;呼吸衰竭;脂肪肝;胆囊息肉;多发性脑梗死;腕和手多处血管损伤;腕和手多处伸肌和肌腱损伤;肩胛骨骨折;肩关节盂骨折;眼睑和眼周区烧伤;手套撕脱伤;开放性多发性掌骨骨折	好转	程碧环	王瑞丽	王瑞丽	掌骨骨折闭合复位钢针内固定术;指骨骨折闭合复位钢针内固定术;骨移植术;残端皮肤修整术;呼吸机治疗[大于等于96小时];拇指截断术;手部肌肉清创术;手部肌腱成形术;腕掌关节成形术;指关节囊缝合术;掌指关节成形术
1699	D06(ICU)	2023-10-05	2023-10-07	3428482	王汉玉	男	56Y	大肠杆菌败血症	尺骨上端骨折;慢性失血性贫血;胸腔积液;胸腔闭式引流术后;脾术后;肺部感染;腰椎退行性病变;手术后状态，其他特指的;脓毒性休克;四根以上肋骨骨折不伴第一肋骨骨折;肺挫伤;髂骨骨折;鹰嘴骨折	未愈	庄荣	庄荣	高叶	气管内插管;呼吸机治疗[大于等于96小时];静脉穿刺术
1700	D06(ICU)	2023-08-18	2023-10-07	3428834	刘腊英	女	51Y	大腿部切断	骶骨骨折;肘开放性伤口;腰椎骨折;耻骨骨折;肺部感染;横纹肌溶解症;胸腔积液;非传染性病因的全身炎症反应综合征伴有器官衰竭;继发性血小板减少;贫血;血容量不足性休克;急性十二指肠球部溃疡并出血;创伤后复发性出血;截断术残端的感染;菌血症	死亡	龚裕强	李忠旺	李忠旺	肌腱、血管、神经探查术;残端皮肤修整术;颈内静脉穿刺中心静脉置管术;连续性肾脏替代治疗[CRRT];气管内插管;静脉穿刺术;呼吸机治疗[大于等于96小时];截断残端的修复术;皮肤和皮下坏死组织切除清创术;腹腔镜下结肠造口术;大腿截断术;皮瓣修整术
1701	D06(ICU)	2023-10-11	2023-10-16	3432392	黄周妹	女	88Y	肺部感染	血容量不足性休克;股骨粗隆间骨折;慢性失血性贫血;特发性(原发性)高血压;2型糖尿病;痴呆	好转	龚裕强	魏大臻	魏大臻	静脉穿刺术
1702	D06(ICU)	2023-10-08	2023-10-21	3434424	万献钗	女	53Y	肺部感染	创伤性硬脑膜外出血;脑挫伤;创伤性蛛网膜下腔出血;顶骨骨折;肋骨多处骨折;腰椎骨折;手术后恢复期;皮下血肿	好转	张晓隆	张晓隆	张晓隆
1703	D06(ICU)	2023-10-15	2023-10-29	3438019	周胜荣	男	56Y	脓毒性休克	脑萎缩;肺部感染;真菌败血症;非传染性病因的全身炎症反应综合征伴有器官衰竭;胫骨骨折累及踝关节;距骨骨折;跟骨骨折;神经梅毒;腔隙性脑梗死;陈旧性肺结核	死亡	程碧环	郭献阳	林国梁	腰椎穿刺术;静脉穿刺术;胫骨骨折切开复位钢针内固定术;踝关节骨折切开复位钢板内固定术;胫骨植骨术;踝关节修补术;腓骨骨折切开复位钢板内固定术
1704	D06(ICU)	2023-10-24	2023-11-02	3439925	潘英	女	60Y	脑内出血	脑疝;呼吸衰竭;脑梗死;高血压;2型糖尿病;肺诊断性影像异常;陈旧性肋骨骨折;肾错构瘤;膀胱憩室	未愈	龚裕强	张文武	张文武	颅骨去骨瓣减压术
1705	D06(ICU)	2023-11-02	2023-11-03	3440570	郑分兰	女	50Y	蛛网膜下出血，其他的	额顶叶脑出血;脑疝;中枢性呼吸衰竭;循环衰竭;高热;中枢性尿崩症;高钠血症;慢性鼻窦炎;胆囊结石;陈旧性肋骨骨折	未愈	庄荣	戴凌燕	戴凌燕	颅内血肿清除术;呼吸机治疗[小于96小时];颅骨去骨瓣减压术
1706	D06(ICU)	2023-11-03	2023-11-04	3440557	林隆	男	67Y	创伤性蛛网膜下腔出血	颅内损伤伴有延长的昏迷;创伤性硬膜下出血;创伤性脑疝;创伤性脑损伤;头皮血肿;顶骨骨折;颞骨骨折;眶骨骨折;胸椎骨折;腰椎滑脱;肾挫伤;腹腔积液;肺挫伤;腰椎间盘突出;颈椎间盘突出;肾结石	未愈	庄荣	戴凌燕	戴凌燕	颅内血肿清除术;呼吸机治疗[小于96小时];颅骨钻孔减压术;脑脊液漏修补术;皮肤和皮下坏死组织切除清创术
1707	D06(ICU)	2023-11-05	2023-11-06	3441512	廖国荣	男	67Y	创伤性蛛网膜下腔出血	创伤性硬膜下出血;创伤性脑疝;慢性呼吸衰竭;凝血障碍;急性肾功能不全;顶骨骨折;皮下血肿;创伤性鼻窦积血;肺大疱;肺诊断性影像异常	死亡	程碧环	王本极	王本极	颅内血肿清除术;呼吸机治疗[小于96小时];静脉穿刺术;颅骨去骨瓣减压术
1708	D06(ICU)	2023-11-10	2023-11-10	3443684	李本康	男	75Y	颅内损伤伴有延长的昏迷	创伤性蛛网膜下腔出血;创伤性硬膜下出血;头皮血肿;颅骨骨折;肋骨多处骨折;肺挫伤;凝血障碍;胫腓骨闭合性骨折;胸腔积液;乙型肝炎肝硬化;肝恶性肿瘤个人史;手术后状态，其他特指的	未愈	龚裕强	谢媚媚	谢媚媚	静脉穿刺术
1709	D06(ICU)	2023-10-11	2023-11-12	3444217	徐定海	男	79Y	创伤性蛛网膜下腔出血	创伤性脑损伤;创伤性脑积水;枕骨骨折;头皮血肿;创伤性湿肺;肺部感染;呼吸衰竭;心房颤动;前列腺增生;肾功能不全;颈椎退行性病变;颈椎间盘突出;下肢动脉粥样硬化;颈椎间盘变性，其他的;甲状腺钙化;甲状腺肿物	未愈	程碧环	王本极	王本极	颅内血肿清除术;暂时性气管切开术;呼吸机治疗[大于等于96小时];气管内插管;颅骨去骨瓣减压术
1710	D06(ICU)	2023-11-11	2023-11-16	3445738	卢进喜	男	64Y	创伤性蛛网膜下腔血肿	创伤性硬脑膜外出血;创伤性脑出血;创伤性脑损伤;枕骨骨折;颞骨骨折;肺诊断性影像异常;肺大疱;多发性肝囊肿;肾上腺肿物;膀胱肿物	未愈	张晓隆	张晓隆	张晓隆	颅内血肿清除术;脑室钻孔引流术;颅骨去骨瓣减压术
1711	D06(ICU)	2023-11-12	2023-11-19	3447209	温兴福	男	86Y	肺部感染	呼吸衰竭;酸中毒;下消化道出血;贫血;股骨颈骨折;多发性脑梗死;老年性脑萎缩;抑郁状态;肾挛缩;慢性肾衰竭;急性肾功能不全;特发性(原发性)高血压;痛风;肝管结石;胆总管结石;下肢动脉粥样硬化	好转	龚裕强	李忠旺	李忠旺	人工股骨头置换术;气管内插管;髋轴面，陶瓷与陶瓷
1712	D06(ICU)	2023-11-12	2023-11-19	3447296	陈春柳	女	91Y	股骨粗隆间骨折	低蛋白血症;脂肪肝;胆囊息肉;后天性肾囊肿;肾结石;下肢动脉粥样硬化	好转	庄荣	王瑞丽	王瑞丽	股骨骨折闭合复位钢针内固定术;股骨骨折闭合复位术
1713	D06(ICU)	2023-11-16	2023-11-25	3449931	邵芳妹	女	73Y	创伤性硬膜下出血	创伤性蛛网膜下腔出血;创伤性脑疝;头皮血肿;创伤性脑损伤;肺部感染;颈椎横突骨折;胆总管扩张;腔隙性脑梗死;老年性脑萎缩;支气管扩张伴感染;肝囊肿;肾结石	未愈	程碧环	陈建时	胡建坚	颅内血肿清除术;颅骨去骨瓣减压术
1714	D06(ICU)	2023-11-11	2023-12-06	3454767	王永生	男	78Y	呼吸衰竭	肺部感染;股骨颈骨折;胸腔积液;冠状动脉粥样硬化性心脏病;冠状动脉搭桥术后;高血压;2型糖尿病;肺肿物;肺肿瘤	好转	龚裕强	张文武	张文武	人工股骨头置换术;髋轴面，陶瓷与陶瓷
1715	D06(ICU)	2023-12-15	2023-12-24	3462496	汤文飞	男	47Y	创伤性蛛网膜下腔出血	创伤性脑损伤;创伤性硬脑膜外出血;颞骨骨折;眶骨骨折;视神经损伤;鼻血肿;头皮血肿;寰椎骨折;肩胛骨骨折;额骨骨折;面骨骨折;上颌骨骨折	死亡	程碧环	林孟相	林孟相	颅内血肿清除术;颅骨去骨瓣减压术
1716	D06(ICU)	2023-12-07	2023-12-25	3463029	李金蕊	女	80Y	脓毒性休克	重症肺炎;呼吸衰竭;急性肾衰竭;急性呼吸窘迫综合征;肠梗阻;股骨粗隆间骨折;肾上腺皮质功能减退症，其他和未特指的;胸腔积液;下肢静脉血栓形成;骨质疏松;手术后状态，其他特指的	未愈	龚裕强	谢媚媚	谢媚媚	股骨骨折闭合复位髓内针内固定术;下腔静脉造影;气管内插管;股静脉穿刺置管术;连续性肾脏替代治疗[CRRT];呼吸机治疗[大于等于96小时];股骨骨折闭合复位术
1717	D06(ICU)	2023-12-17	2023-12-28	3464388	李金凤	女	55Y	创伤性蛛网膜下腔出血	创伤性硬脑膜下血肿;脑挫伤;顶骨骨折;枕骨骨折;头皮血肿;肺部感染;肺不张;急性肾功能不全;中枢性尿崩症	死亡	程碧环	王瑞丽	王瑞丽
1718	D07儿童骨科、骨盆外科	2022-12-22	2023-01-01	3314289	陈寅	男	8Y	胫骨骨干骨折	跟骨骨折	好转	张敬东	李玉安	方明桥	胫骨骨折闭合复位髓内针内固定术
1719	D07儿童骨科、骨盆外科	2022-12-18	2023-01-02	3314356	陈钇衡	男	7Y	股骨粗隆间骨折		好转	张敬东	李玉安	王伟	股骨骨折闭合复位髓内针内固定术
1720	D07儿童骨科、骨盆外科	2022-12-25	2023-01-02	3314359	张俊博	男	5Y	股骨干骨折		治愈	张敬东	闫广奎	方明桥	股骨骨折闭合复位髓内针内固定术
1721	D07儿童骨科、骨盆外科	2022-12-24	2023-01-02	3314365	林良国	男	55Y	胫骨骨干骨折	小腿特指浅表损伤;踝关节扭伤	好转	孔建中	陈墨川	方文来	胫骨骨折切开复位钢板内固定术
1722	D07儿童骨科、骨盆外科	2022-12-27	2023-01-02	3314400	林少娜	女	35Y	锁骨骨折	肝病	好转	孔建中	陈墨川	方文来	锁骨骨折切开复位钢板内固定术
1723	D07儿童骨科、骨盆外科	2022-12-13	2023-01-02	3314405	程四保	男	48Y	开放性三踝骨折	胫骨下端骨折;胫腓韧带远端撕裂;脂肪肝	治愈	翁益民	翁益民	项光恒	创面负压封闭引流[VSD];胫骨外固定架固定术;腓骨骨折闭合复位髓内针内固定术;踝关节骨折切开复位螺钉内固定术
1724	D07儿童骨科、骨盆外科	2022-12-19	2023-01-02	3314406	姚臣妹	女	72Y	股骨粗隆间骨折	高血压病;脑卒中后遗症;糖尿病;下肢动脉粥样硬化	治愈	翁益民	翁益民	项光恒	股骨骨折闭合复位髓内针内固定术
1725	D07儿童骨科、骨盆外科	2022-12-22	2023-01-02	3314410	苏传茂	男	35Y	跟骨骨折	乙型肝炎大三阳	治愈	翁益民	翁益民	项光恒	跟骨骨折切开复位钢板内固定术
1726	D07儿童骨科、骨盆外科	2022-12-18	2023-01-02	3314414	陈德西	男	59Y	髌骨骨折	后天性肾囊肿;距骨骨折;胫距关节脱位;跖骨骨折;跟骨骨折;头皮开放性伤口;下肢静脉血栓形成;脂肪肝;胆总管结石;肾结石	好转	孔建中	陈墨川	方文来	髌骨骨折切开复位张力带钢丝内固定术;跖骨骨折切开复位钢针内固定术;跗骨骨折切开复位钢针内固定术
1727	D07儿童骨科、骨盆外科	2022-12-23	2023-01-02	3314426	杨臣俊	男	5Y	股骨干骨折		治愈	张敬东	易先宏	王伟	股骨骨折闭合复位髓内针内固定术
1728	D07儿童骨科、骨盆外科	2022-12-24	2023-01-02	3314725	李阿足	女	87Y	股骨粗隆间骨折	肺部感染;多发性肋骨骨折;胫腓骨干骨折;肝囊肿;下肢动脉粥样硬化;不完全性右束支传导阻滞;创伤性胸腔积液	好转	孔建中	陈墨川	方文来	股骨骨折切开复位髓内针内固定术;腓骨骨折切开复位髓内针内固定术;胫骨骨折切开复位钢板内固定术
1729	D07儿童骨科、骨盆外科	2022-12-18	2023-01-03	3314882	金素华	女	55Y	跟骨骨折	脂肪肝	好转	孔建中	陈墨川	方文来	创面负压封闭引流[VSD];跟骨人工骨植骨术;跟骨骨折切开复位钢板内固定术
1730	D07儿童骨科、骨盆外科	2022-12-25	2023-01-04	3315216	陈耀	男	40Y	肱骨上端骨折	高脂血症	治愈	翁益民	翁益民	项光恒	肱骨骨折切开复位钢板内固定术
1731	D07儿童骨科、骨盆外科	2022-12-21	2023-01-04	3315217	万显秋	男	49Y	鹰嘴骨折	特指精神和行为障碍个人史;蛛网膜囊肿;面部软组织挫伤;上颌骨骨折;多发性骨盆骨折;经大转子骨折	治愈	翁益民	翁益民	项光恒	尺骨骨折切开复位钢板内固定术;股骨骨折闭合复位螺钉内固定术
1732	D07儿童骨科、骨盆外科	2022-12-25	2023-01-04	3315220	何立人	男	13Y	锁骨骨折		治愈	翁益民	翁益民	项光恒	锁骨骨折切开复位钢板内固定术
1733	D07儿童骨科、骨盆外科	2022-12-31	2023-01-04	3315221	麻温君	女	2Y	股骨粗隆间骨折		好转	张敬东	闫广奎	王伟	石膏绷带固定;股骨骨折闭合复位术
1734	D07儿童骨科、骨盆外科	2022-12-30	2023-01-05	3315544	程馨瑶	女	4Y	肱骨髁上骨折		治愈	张敬东	易先宏	方明桥	肱骨骨折闭合复位钢针内固定术
1735	D07儿童骨科、骨盆外科	2022-12-23	2023-01-05	3315588	潘统海	男	49Y	踝骨闭合性骨折	距骨骨折;胫骨上端骨折;髌骨骨折;股骨下端骨折;腕部挫伤;肋骨骨折;前列腺结石;肝囊肿	好转	孔建中	陈墨川	方文来	踝关节骨折切开复位螺钉内固定术
1736	D07儿童骨科、骨盆外科	2023-01-03	2023-01-05	3315609	钱周玮	男	1Y	肱骨髁上骨折		好转	张敬东	李玉安	方明桥	肱骨骨折闭合复位钢针内固定术
1737	D07儿童骨科、骨盆外科	2022-12-24	2023-01-05	3315757	陈献忠	男	55Y	股骨干骨折	手舟状骨骨折;下肢静脉血栓形成;脂肪肝;肝钙化灶;桡骨下端骨折;腰椎骨折	好转	孔建中	陈墨川	方文来	桡骨骨折切开复位钢板内固定术;股骨骨折闭合复位髓内针内固定术;椎弓根钉内固定术
1738	D07儿童骨科、骨盆外科	2022-12-30	2023-01-07	3316087	麻莲珠	女	72Y	踝骨闭合性骨折	楔状骨骨折(足);骨囊肿;高血压病	好转	翁益民	翁益民	项光恒
1739	D07儿童骨科、骨盆外科	2023-01-02	2023-01-07	3316092	叶陈梅	女	51Y	取除骨折内固定装置	脑卒中后遗症;高血压病	其他	翁益民	翁益民	项光恒	股骨内固定物取出术
1740	D07儿童骨科、骨盆外科	2023-01-02	2023-01-07	3316097	王慕心	女	5Y	取除骨折内固定装置		其他	孔建中	李玉安	方明桥	肱骨内固定物取出术
1741	D07儿童骨科、骨盆外科	2023-01-03	2023-01-07	3316102	林芯语	女	2Y	肱骨外髁骨折		治愈	张敬东	李玉安	王伟	肱骨骨折切开复位钢针内固定术
1742	D07儿童骨科、骨盆外科	2022-12-24	2023-01-07	3316111	谢优璇	女	8Y	胫骨骨干骨折		好转	张敬东	闫广奎	王伟	胫骨骨折闭合复位螺钉内固定术;腓骨骨折切开复位钢板内固定术
1743	D07儿童骨科、骨盆外科	2022-12-29	2023-01-07	3316114	林怡岑	女	11Y	鹰嘴骨折		好转	张敬东	李玉安	王伟	尺骨骨折切开复位钢针内固定术
1744	D07儿童骨科、骨盆外科	2023-01-06	2023-01-07	3316300	余定菊	女	82Y	股骨粗隆间骨折	高血压病	好转	翁益民	翁益民	项光恒
1745	D07儿童骨科、骨盆外科	2022-12-29	2023-01-08	3316559	叶俊泽	男	13Y	肱骨外髁骨折		好转	张敬东	闫广奎	王伟	肱骨骨折切开复位螺钉内固定术
1746	D07儿童骨科、骨盆外科	2022-12-25	2023-01-08	3316565	苏荫淼	男	72Y	股骨粗隆间骨折	髋关节病;高血压病;糖尿病;前列腺增生;前列腺结石	治愈	翁益民	翁益民	项光恒	股骨骨折闭合复位髓内针内固定术
1747	D07儿童骨科、骨盆外科	2022-12-22	2023-01-08	3316574	方程杰	男	14Y	跟骨骨折	硬膜下血肿;腰椎骨折;腰骶部脊柱骨折	好转	张敬东	李玉安	王伟	跟骨骨折切开复位钢板内固定术
1748	D07儿童骨科、骨盆外科	2022-12-30	2023-01-08	3316656	邵志毅	男	85Y	股骨粗隆间骨折	脂肪肝;后天性肾囊肿	好转	孔建中	陈墨川	方文来	股骨骨折闭合复位髓内针内固定术
1749	D07儿童骨科、骨盆外科	2023-01-03	2023-01-09	3316908	王子瑜	男	6Y	取除骨折内固定装置		其他	张敬东	闫广奎	王伟	股骨内固定物取出术
1750	D07儿童骨科、骨盆外科	2022-12-08	2023-01-09	3316933	杨笑予	女	13Y	胫骨骨干骨折	开放性小腿特指部位损伤	好转	张敬东	闫广奎	方明桥	胫骨骨折切开复位钢板内固定术;石膏绷带固定
1751	D07儿童骨科、骨盆外科	2023-01-02	2023-01-09	3316955	赵经琨	男	11Y	肱骨内髁骨折		好转	张敬东	李玉安	方明桥	肱骨骨折切开复位钢针内固定术
1752	D07儿童骨科、骨盆外科	2022-12-30	2023-01-09	3317107	方黎明	女	53Y	髌骨骨折	胆囊息肉;甲状腺结节;纤维囊性乳腺病	好转	孔建中	陈墨川	方文来	髌韧带缝合术;髌骨骨折切开复位张力带钢丝内固定术
1753	D07儿童骨科、骨盆外科	2022-12-30	2023-01-09	3317203	叶素香	女	84Y	股骨粗隆间骨折	慢性胃炎;下肢动脉粥样硬化	治愈	翁益民	翁益民	项光恒	股骨骨折闭合复位髓内针内固定术
1754	D07儿童骨科、骨盆外科	2022-12-18	2023-01-09	3317205	王朝生	男	49Y	跖骨骨折	小腿水平大隐静脉损伤;开放性足损伤;胆囊结石;楔状骨骨折(足);骰骨骨折	治愈	翁益民	翁益民	项光恒	跖骨骨折切开复位钢针内固定术;创面负压封闭引流[VSD];皮肤和皮下坏死组织切除清创术;下腔静脉缝合术;跗骨骨折切开复位钢针内固定术
1755	D07儿童骨科、骨盆外科	2022-12-19	2023-01-10	3317381	姜秀容	女	66Y	肱骨下端骨折	尺骨上端骨折;2型糖尿病;脂肪肝	好转	孔建中	陈墨川	方文来	肱骨骨折切开复位钢板内固定术;尺骨骨折切开复位钢针内固定术;肘关节韧带修补术
1756	D07儿童骨科、骨盆外科	2023-01-05	2023-01-10	3317444	任稳柱	男	60Y	股骨粗隆间骨折	后天性肾囊肿;前列腺结石;下肢动脉粥样硬化;心动过缓	治愈	孔建中	陈墨川	方文来	股骨外固定架固定术;股骨骨折闭合复位术
1757	D07儿童骨科、骨盆外科	2022-12-30	2023-01-10	3317491	赵良英	女	64Y	股骨颈骨折	后天性肾囊肿;下肢动脉粥样硬化	好转	孔建中	陈墨川	方文来	陶瓷-聚乙烯髋关节置换;全髋关节置换术
1758	D07儿童骨科、骨盆外科	2023-01-08	2023-01-11	3318091	梁宸滔	男	20Y	手舟状骨骨折	膝挫伤;跖骨骨折;股骨下端骨折;髌骨骨折;特指腕骨骨折	好转	翁益民	翁益民	项光恒
1759	D07儿童骨科、骨盆外科	2023-01-02	2023-01-11	3318096	叶剑鸣	男	49Y	跖骨骨折	特指趾骨骨折;开放性多发性踝和足损伤;肾结石;脂肪肝;前列腺结石	好转	翁益民	翁益民	项光恒
1760	D07儿童骨科、骨盆外科	2023-01-05	2023-01-11	3318123	刘银柳	女	70Y	骨盆骨折	高血压病;2型糖尿病;下肢动脉粥样硬化;脂肪肝	好转	孔建中	陈墨川	方文来	骨盆钢针内固定术
1761	D07儿童骨科、骨盆外科	2023-01-04	2023-01-12	3318360	贺洋	男	29Y	双踝骨折	踝关节半脱位;肺大泡	好转	孔建中	陈墨川	方文来	踝关节骨折切开复位钢板内固定术
1762	D07儿童骨科、骨盆外科	2023-01-08	2023-01-12	3318408	何湘捷	女	76Y	肱骨上端骨折	高血压病;2型糖尿病;后天性肾囊肿	好转	孔建中	陈墨川	方文来	肩袖修补术;肱骨骨折切开复位螺钉内固定术
1763	D07儿童骨科、骨盆外科	2023-01-09	2023-01-13	3318735	朱舒涛	男	10Y	肱骨髁上骨折	前臂正中神经损伤	治愈	张敬东	易先宏	王伟	肱骨骨折闭合复位钢针内固定术
1764	D07儿童骨科、骨盆外科	2023-01-07	2023-01-13	3318755	颜雨婷	女	3Y	肱骨外髁骨折		治愈	张敬东	闫广奎	王伟	肱骨骨折闭合复位钢针内固定术
1765	D07儿童骨科、骨盆外科	2023-01-09	2023-01-14	3318898	吴俊熙	男	9Y	股骨干骨折	开放性膝部损伤	好转	张敬东	易先宏	闫广奎	石膏绷带固定;皮肤缝合术;皮肤和皮下组织非切除性清创
1766	D07儿童骨科、骨盆外科	2022-12-26	2023-01-14	3318950	薛圣康	男	18Y	胫骨骨干骨折	特指肾盂积水	好转	孔建中	陈墨川	方文来	肌腱探查术;腓骨骨折闭合复位髓内针内固定术;胫骨骨折闭合复位髓内针内固定术
1767	D07儿童骨科、骨盆外科	2023-01-02	2023-01-14	3318967	陈加日	男	58Y	胫骨骨干骨折	脂肪肝	好转	孔建中	陈墨川	方文来	胫骨人工骨植骨术;胫骨骨折切开复位钢板内固定术
1768	D07儿童骨科、骨盆外科	2022-10-19	2023-01-14	3318988	金纬自	男	61Y	闭合性胫骨平台骨折	老年性心脏病;完全性左束支传导阻滞;多处挫伤;创伤性气胸;高血压病;肺气肿;肺结节;肱骨干骨折;骨盆骨折;上臂桡神经损伤	好转	孔建中	陈墨川	方文来	膝关节半月板成形术;胫骨骨折切开复位钢板内固定术;皮肤缝合术;皮肤和皮下坏死组织切除清创术;创面负压封闭引流[VSD];骨空隙填补物置入术;肱骨骨折切开复位钢板内固定术
1769	D07儿童骨科、骨盆外科	2022-12-30	2023-01-14	3319018	贾孝贤	男	32Y	双踝骨折	脂肪肝;胆囊息肉	好转	孔建中	陈墨川	方文来	踝关节骨折切开复位钢板内固定术
1770	D07儿童骨科、骨盆外科	2023-01-04	2023-01-15	3319402	林建彬	男	34Y	锁骨骨折	肩胛骨骨折;肝钙化灶;陈旧性肋骨骨折;脂肪肝	治愈	翁益民	翁益民	项光恒	锁骨骨折切开复位钢板内固定术
1771	D07儿童骨科、骨盆外科	2022-12-28	2023-01-15	3319427	陈秀眉	女	93Y	股骨颈骨折	肾结石;肺结节;多发性脑梗死;肺部感染;冠状动脉粥样硬化性心脏病;下肢静脉血栓形成;肝囊肿	未愈	孔建中	陈墨川	方文来
1772	D07儿童骨科、骨盆外科	2023-01-05	2023-01-15	3319430	叶德福	男	71Y	股骨颈骨折	耻骨骨折;高血压病;2型糖尿病;面神经麻痹;颈动脉硬化;前列腺增生;前列腺结石	好转	孔建中	陈墨川	方文来	陶瓷-陶瓷髋关节置换;人工双动股骨头置换术
1773	D07儿童骨科、骨盆外科	2023-01-03	2023-01-15	3319436	邵国岳	男	82Y	股骨颈骨折	动脉瘤;下肢静脉血栓形成;多发性脑梗死;窦性心律失常;肝钙化灶	治愈	翁益民	翁益民	项光恒	人工双动股骨头置换术
1774	D07儿童骨科、骨盆外科	2023-01-09	2023-01-15	3319463	丁炜	女	87Y	股骨粗隆间骨折	具有心脏起搏器;下肢动脉粥样硬化	好转	孔建中	陈墨川	方文来	股骨外固定架固定术;股骨骨折闭合复位术
1775	D07儿童骨科、骨盆外科	2023-01-06	2023-01-16	3319960	余志阳	男	7Y	股骨干骨折	肱骨髁上骨折;面部擦伤	治愈	张敬东	易先宏	闫广奎	股骨骨折闭合复位髓内针内固定术
1776	D07儿童骨科、骨盆外科	2023-01-06	2023-01-16	3319965	罗玉凤	女	85Y	尺骨桡骨远端骨折	跖骨骨折;头皮血肿;多发性脑梗死;老年性脑萎缩;后天性肾囊肿;肝钙化灶	治愈	翁益民	翁益民	项光恒	桡骨外固定架固定术;尺骨骨折闭合复位钢针内固定术;桡骨骨折闭合复位螺钉内固定术
1777	D07儿童骨科、骨盆外科	2023-01-04	2023-01-16	3319986	张仪	男	45Y	髌骨骨折	脂肪肝;胆囊息肉;乙型肝炎小三阳	治愈	翁益民	翁益民	项光恒	髌骨骨折切开复位张力带钢丝内固定术
1778	D07儿童骨科、骨盆外科	2023-01-11	2023-01-16	3320010	叶锡元	男	69Y	肱骨上端骨折	肩关节脱位;肩胛骨骨折;后天性肾囊肿;前列腺增生;脂肪肝;高血压病	好转	孔建中	陈墨川	方文来	肩袖修补术;肱骨骨折切开复位螺钉内固定术;肩关节脱位闭合复位术
1779	D07儿童骨科、骨盆外科	2023-01-09	2023-01-16	3320034	叶彩凤	女	86Y	股骨颈骨折	高血压病;下肢静脉血栓形成;下肢动脉粥样硬化;特指肾盂积水;老年性心脏病	治愈	孔建中	陈墨川	方文来	人工双动股骨头置换术
1780	D07儿童骨科、骨盆外科	2023-01-12	2023-01-17	3320331	林毅	男	7Y	取除骨折内固定装置		其他	张敬东	易先宏	闫广奎	股骨内固定物取出术
1781	D07儿童骨科、骨盆外科	2023-01-15	2023-01-17	3320612	郑亿珍	男	20Y	腕骨骨折		好转	孔建中	陈墨川	方文来
1782	D07儿童骨科、骨盆外科	2023-01-13	2023-01-18	3320832	张友涵	男	6Y	取除骨折内固定装置		其他	张敬东	易先宏	闫广奎	股骨内固定物取出术
1783	D07儿童骨科、骨盆外科	2023-01-14	2023-01-18	3320835	李沐轩	男	2Y	取除骨折内固定装置	耻骨骨折	其他	张敬东	易先宏	闫广奎	股骨内固定物取出术
1784	D07儿童骨科、骨盆外科	2023-01-11	2023-01-18	3320838	颜贻胜	男	44Y	髌骨骨折	脂肪肝;前列腺结石	好转	孔建中	陈墨川	方文来	股四头肌成形术;髌骨骨折切开复位张力带钢丝内固定术
1785	D07儿童骨科、骨盆外科	2023-01-10	2023-01-18	3320841	蒋学兰	女	74Y	肱骨上端骨折	高血压病;脂肪肝;肝囊肿;颈动脉硬化;下肢静脉血栓形成;多个心瓣膜疾病	好转	孔建中	陈墨川	方文来	肱骨人工骨植骨术;肩袖修补术;肱骨骨折切开复位钢板内固定术
1786	D07儿童骨科、骨盆外科	2022-12-29	2023-01-18	3320845	周文荣	男	44Y	胫腓骨干骨折	高血压病;脂肪肝;后天性肾囊肿;前列腺结石;肝功能异常	好转	孔建中	陈墨川	方文来	腓骨骨折闭合复位髓内针内固定术;胫骨骨折切开复位钢板内固定术
1787	D07儿童骨科、骨盆外科	2023-01-04	2023-01-18	3320865	郑秀娟	女	54Y	闭合性胫骨平台骨折	高血压病;肝囊肿;胆囊息肉;后天性肾囊肿;多个心瓣膜疾病	好转	孔建中	陈墨川	方文来	胫骨骨折切开复位钢板内固定术
1788	D07儿童骨科、骨盆外科	2023-01-12	2023-01-19	3321415	郭翠兰	女	83Y	股骨颈骨折	多个心瓣膜疾病;支气管扩张;高血压病;肺结节;肝囊肿;老年性心脏病;主动脉钙化;纵隔淋巴结肿大	好转	孔建中	陈墨川	方文来	人工双动股骨头置换术
1789	D07儿童骨科、骨盆外科	2023-01-17	2023-01-19	3321486	杨雨嘉	女	9Y	取除骨折内固定装置		其他	张敬东	易先宏	闫广奎	桡骨内固定物取出术
1790	D07儿童骨科、骨盆外科	2023-01-16	2023-01-20	3321598	高维洁	女	9Y	取除骨折内固定装置		其他	张敬东	易先宏	闫广奎	股骨内固定物取出术
1791	D07儿童骨科、骨盆外科	2023-01-16	2023-01-20	3321619	周家宝	男	5Y	取除骨折内固定装置		其他	张敬东	李玉安	方明桥	肱骨内固定物取出术
1792	D07儿童骨科、骨盆外科	2023-01-16	2023-01-21	3321776	林陈沛	男	9Y	指骨骨折		治愈	张敬东	易先宏	闫广奎	指骨骨折切开复位钢针内固定术
1793	D07儿童骨科、骨盆外科	2023-01-14	2023-01-21	3321783	张轶焱	男	10Y	踝骨闭合性骨折	踝和足韧带破裂	治愈	孔建中	易先宏	闫广奎	足韧带缝合术;踝关节骨折切开复位钢针内固定术
1794	D07儿童骨科、骨盆外科	2023-01-16	2023-01-21	3321800	叶天乐	男	3Y	取除骨折内固定装置		其他	张敬东	李玉安	方明桥	股骨内固定物取出术
1795	D07儿童骨科、骨盆外科	2023-01-14	2023-01-21	3321844	钱花妹	女	78Y	肱骨上端骨折	尺骨桡骨远端骨折;高血压病;下肢动脉粥样硬化;肺结节;多个心瓣膜疾病;贫血	好转	孔建中	陈墨川	方文来	肱骨人工骨植骨术;肩袖修补术;肱骨骨折切开复位钢板内固定术
1796	D07儿童骨科、骨盆外科	2023-01-15	2023-01-21	3321857	雷玉真	女	5Y	肱骨内髁骨折	鹰嘴骨折	治愈	张敬东	易先宏	闫广奎	肱骨骨折切开复位钢针内固定术
1797	D07儿童骨科、骨盆外科	2023-01-19	2023-01-22	3322227	何阿香	女	77Y	肩关节脱位	高血压病;下肢动脉粥样硬化;脂肪肝;后天性肾囊肿;肱骨上端骨折;二尖瓣及主动脉瓣关闭不全;低钾血症	治愈	石成弟	胡炜	胡炜	肩关节脱位闭合复位术
1798	D07儿童骨科、骨盆外科	2023-01-16	2023-01-22	3322434	林锦虎	男	44Y	双踝骨折	骰骨骨折;跖骨骨折;楔状骨骨折(足);脂肪肝;后天性肾囊肿;特指肾盂积水;肾结石	好转	孔建中	陈墨川	方文来	踝关节骨折切开复位螺钉内固定术
1799	D07儿童骨科、骨盆外科	2023-01-09	2023-01-22	3322462	王中华	女	45Y	三踝骨折		治愈	翁益民	翁益民	项光恒	踝关节骨折切开复位钢板内固定术
1800	D07儿童骨科、骨盆外科	2023-01-10	2023-01-22	3322550	周玉东	男	93Y	股骨粗隆间骨折	心律失常;下肢动脉粥样硬化;慢性支气管炎;肺气肿;后天性肾囊肿	治愈	翁益民	翁益民	项光恒	股骨骨折闭合复位髓内针内固定术
1801	D07儿童骨科、骨盆外科	2023-01-14	2023-01-23	3322688	杨杨沛	男	31Y	髌骨骨折	脑挫伤;眼睑挫伤;额骨骨折;颞骨骨折;颅腔积气;眶骨骨折	好转	孔建中	陈墨川	方文来	股四头肌缝合术;髌骨骨折切开复位张力带钢丝内固定术
1802	D07儿童骨科、骨盆外科	2023-01-19	2023-01-23	3322790	郑悉汝	女	9Y	取除骨折内固定装置		其他	张敬东	易先宏	闫广奎	胫骨内固定物取出术
1803	D07儿童骨科、骨盆外科	2023-01-08	2023-01-23	3322796	高翠兰	女	46Y	髋臼骨折	骨盆骨折	治愈	翁益民	翁益民	项光恒	骨盆骨折切开复位钢板内固定术;髋骨骨折切开复位钢板内固定术
1804	D07儿童骨科、骨盆外科	2023-01-09	2023-01-23	3322807	张彩霞	女	62Y	髌骨骨折	肺部感染;胸腔积液;心包积液;胫骨良性肿瘤;高血压病;糖尿病	治愈	翁益民	翁益民	项光恒	髌骨骨折切开复位张力带钢丝内固定术
1805	D07儿童骨科、骨盆外科	2023-01-18	2023-01-23	3322808	朱相同	男	7Y	取除骨折内固定装置		其他	张敬东	易先宏	闫广奎	肱骨内固定物取出术
1806	D07儿童骨科、骨盆外科	2023-01-10	2023-01-23	3322827	卢渝博	男	9Y	股骨干骨折		治愈	张敬东	易先宏	闫广奎	股骨骨折闭合复位髓内针内固定术
1807	D07儿童骨科、骨盆外科	2023-01-18	2023-01-23	3322831	陈姜昊	男	9Y	取除骨折内固定装置		其他	张敬东	易先宏	闫广奎	肱骨内固定物取出术
1808	D07儿童骨科、骨盆外科	2023-01-12	2023-01-23	3322888	叶丽英	女	53Y	三踝骨折	泌尿道感染	好转	孔建中	陈墨川	方文来	踝关节骨折切开复位钢板内固定术
1809	D07儿童骨科、骨盆外科	2023-01-11	2023-01-23	3322897	朱小女	女	72Y	肱骨上端骨折	肩袖损伤;2型糖尿病;脂肪肝;胆囊结石;肾结石	好转	孔建中	陈墨川	方文来	肱骨人工骨植骨术;肩袖修补术;肱骨骨折切开复位钢板内固定术
1810	D07儿童骨科、骨盆外科	2023-01-15	2023-01-24	3323267	黄圣做	男	36Y	肱骨外科颈骨折	乙型肝炎大三阳	治愈	翁益民	翁益民	项光恒	肱骨骨折切开复位钢板内固定术
1811	D07儿童骨科、骨盆外科	2023-01-20	2023-01-24	3323276	兰梓湛	男	8Y	取除骨折内固定装置		其他	张敬东	易先宏	闫广奎	腓骨内固定物取出术;胫骨内固定物取出术
1812	D07儿童骨科、骨盆外科	2023-01-17	2023-01-24	3323286	王孝帅	男	53Y	骨盆骨折	多发性肋骨骨折;腰椎骨折;肺气肿;结肠憩室;下肢动脉粥样硬化;肺结节	好转	孔建中	陈墨川	方文来	骨盆外固定架固定术;骨盆骨折闭合复位术
1813	D07儿童骨科、骨盆外科	2023-01-10	2023-01-24	3323289	柳碎花	女	87Y	股骨颈骨折	骨折治疗后恢复期;高血压病;盆腔肿物;肾结石;肝囊肿	治愈	翁益民	翁益民	项光恒	人工双动股骨头置换术
1814	D07儿童骨科、骨盆外科	2023-01-21	2023-01-24	3323298	徐苑弼	女	13Y	取除骨折内固定装置		其他	张敬东	易先宏	闫广奎	踝关节内固定物取出术
1815	D07儿童骨科、骨盆外科	2023-01-17	2023-01-24	3323306	陈桃妹	女	74Y	股骨粗隆间骨折	高血压病;2型糖尿病;多个心瓣膜疾病	好转	孔建中	陈墨川	方文来	股骨外固定架固定术;股骨骨折闭合复位术
1816	D07儿童骨科、骨盆外科	2023-01-15	2023-01-24	3323307	潘曲飞	男	45Y	股骨下端骨折	开放性多处头部损伤;膝关节积液;脂肪肝	治愈	翁益民	翁益民	项光恒	股骨骨折切开复位钢板内固定术
1817	D07儿童骨科、骨盆外科	2023-01-22	2023-01-25	3323777	李砚璞	女	10Y	肱骨髁上骨折		好转	张敬东	李玉安	方明桥	肱骨骨折闭合复位钢针内固定术
1818	D07儿童骨科、骨盆外科	2023-01-14	2023-01-25	3323781	郑瑾玥	女	2Y	足趾挤压伤	创伤性骨筋膜室综合征;跟骨骨折	好转	张敬东	易先宏	方明桥	创面负压封闭引流[VSD];足血管、神经、肌腱探查术;皮肤和皮下组织非切除性清创;石膏绷带固定;皮肤缝合术
1819	D07儿童骨科、骨盆外科	2023-01-21	2023-01-25	3323788	商茂梓	男	11Y	取除骨折内固定装置		其他	张敬东	李玉安	方明桥	踝关节内固定物取出术
1820	D07儿童骨科、骨盆外科	2023-01-16	2023-01-25	3323802	陈凤翠	女	82Y	股骨粗隆间骨折	高血压病;多个心瓣膜疾病;特指动脉动脉粥样硬化;房性早搏;肾衰竭	好转	孔建中	陈墨川	方文来	股骨外固定架固定术;股骨骨折闭合复位术
1821	D07儿童骨科、骨盆外科	2023-01-21	2023-01-26	3324325	靳双旗	男	13Y	取除骨折内固定装置		其他	张敬东	易先宏	方明桥	锁骨内固定物取出术
1822	D07儿童骨科、骨盆外科	2023-01-24	2023-01-26	3324360	陈宏宇	男	8Y	取除骨折内固定装置		其他	张敬东	闫广奎	方明桥	尺骨内固定物取出术
1823	D07儿童骨科、骨盆外科	2023-01-21	2023-01-26	3324401	康贝儿	女	6Y	肱骨外髁骨折		治愈	张敬东	李玉安	方明桥	肱骨骨折切开复位钢针内固定术
1824	D07儿童骨科、骨盆外科	2023-01-23	2023-01-26	3324405	黄浩然	男	7Y	取除骨折内固定装置		其他	张敬东	李玉安	方明桥	桡骨内固定物取出术
1825	D07儿童骨科、骨盆外科	2023-01-23	2023-01-26	3324505	朱建东	男	49Y	开放性踝损伤	多处挫伤;小腿水平腓神经损伤;楔状骨骨折(足);腓骨骨折	治愈	翁益民	翁益民	项光恒	腱鞘缝合术;创面负压封闭引流[VSD];皮肤和皮下组织非切除性清创
1826	D07儿童骨科、骨盆外科	2023-01-16	2023-01-28	3324854	林松钗	女	75Y	肱骨上端骨折	陈旧性桡骨骨折;消化道出血;晕厥和虚脱;颈动脉硬化;脂肪肝;后天性肾囊肿	治愈	孔建中	陈墨川	方文来	肱骨人工骨植骨术;肩袖修补术;肱骨骨折切开复位钢板内固定术
1827	D07儿童骨科、骨盆外科	2023-01-18	2023-01-28	3324860	陈满娟	女	40Y	闭合性胫骨平台骨折	病毒性上呼吸道感染;脂肪肝;胆囊息肉	好转	孔建中	陈墨川	方文来	胫骨人工骨植骨术;胫骨骨折切开复位钢板内固定术
1828	D07儿童骨科、骨盆外科	2023-01-23	2023-01-28	3324865	金昊	男	6Y	取除骨折内固定装置		其他	张敬东	方明桥	方明桥	胫骨内固定物取出术
1829	D07儿童骨科、骨盆外科	2023-01-24	2023-01-28	3324877	吴馨怡	女	7Y	肱骨干骨折		治愈	张敬东	闫广奎	方明桥	肱骨骨折闭合复位螺钉内固定术
1830	D07儿童骨科、骨盆外科	2023-01-23	2023-01-28	3324880	卓昊	男	17Y	取除骨折内固定装置		其他	翁益民	翁益民	项光恒	踝关节内固定物取出术
1831	D07儿童骨科、骨盆外科	2023-01-23	2023-01-28	3324887	邓萧溢	男	12Y	甲沟炎	取除骨折内固定装置	治愈	张敬东	李玉安	方明桥	踝关节内固定物取出术;甲成形术;拔甲术
1832	D07儿童骨科、骨盆外科	2023-01-23	2023-01-28	3324889	陈迦豪	男	8Y	取除骨折内固定装置		其他	张敬东	李玉安	方明桥	腓骨内固定物取出术;胫骨内固定物取出术
1833	D07儿童骨科、骨盆外科	2023-01-20	2023-01-28	3324891	陈韩瑜	男	8Y	双踝骨折	额骨骨折;头皮血肿;肺挫伤;创伤性气胸	好转	张敬东	李玉安	方明桥	踝关节骨折闭合复位钢针内固定术
1834	D07儿童骨科、骨盆外科	2023-01-19	2023-01-28	3324898	林金娥	女	75Y	股骨颈骨折	高血压病;颈动脉硬化;下肢动脉粥样硬化;多个心瓣膜疾病;房性早搏	好转	孔建中	陈墨川	方文来	陶瓷-陶瓷髋关节置换;全髋关节置换术
1835	D07儿童骨科、骨盆外科	2023-01-14	2023-01-30	3325815	陈小岳	女	65Y	胫腓骨干骨折	多发性脑梗死;创伤性蛛网膜下腔出血;多发性肋骨骨折;眼周区挫伤;头皮血肿;肝囊肿;肝钙化灶	治愈	翁益民	翁益民	项光恒	腓骨骨折闭合复位髓内针内固定术;胫骨骨折切开复位钢板内固定术
1836	D07儿童骨科、骨盆外科	2023-01-21	2023-01-30	3325914	赖少华	男	55Y	骨盆骨折	颈椎间盘突出	治愈	孔建中	方文来	陈墨川	骨盆骨折切开复位钢板内固定术
1837	D07儿童骨科、骨盆外科	2023-01-25	2023-01-30	3325925	王锦垚	男	4Y	肱骨外髁骨折		治愈	孔建中	易先宏	方明桥	关节软骨修复术;肱骨骨折切开复位钢针内固定术
1838	D07儿童骨科、骨盆外科	2023-01-25	2023-01-30	3325938	陈凯	男	15Y	取除骨折内固定装置		其他	张敬东	易先宏	王伟	髋关节内固定物取出术
1839	D07儿童骨科、骨盆外科	2023-01-26	2023-01-30	3325939	兰博	男	8Y	取除骨折内固定装置		其他	张敬东	易先宏	王伟	股骨内固定物取出术
1840	D07儿童骨科、骨盆外科	2023-01-26	2023-01-30	3325947	郑婉婧	女	9Y	取除骨折内固定装置		其他	张敬东	易先宏	王伟	股骨内固定物取出术
1841	D07儿童骨科、骨盆外科	2023-01-18	2023-01-30	3325950	许海越	男	7Y	肱骨干骨折	腋神经损伤;开放性唇部损伤;开放性腹壁损伤;多处挫伤;腹水	治愈	孔建中	李玉安	方明桥	肱骨骨折闭合复位髓内针内固定术
1842	D07儿童骨科、骨盆外科	2023-01-25	2023-01-30	3325954	陈飞鹏	男	10Y	取除骨折内固定装置		其他	张敬东	易先宏	方明桥	胫骨内固定物取出术
1843	D07儿童骨科、骨盆外科	2023-01-26	2023-01-30	3325956	叶浩淼	男	12Y	取除骨折内固定装置		其他	张敬东	易先宏	方明桥	肱骨内固定物取出术
1844	D07儿童骨科、骨盆外科	2023-01-01	2023-01-30	3325959	王孟松	男	56Y	胫腓骨干骨折	头皮血肿;膝挫伤;后天性肾囊肿;前列腺增生;高血压病;2型糖尿病;下肢动脉粥样硬化;脂肪肝;多发性肋骨骨折;创伤性气胸	治愈	孔建中	方文来	陈墨川	胫骨骨折切开复位髓内针内固定术;胫骨骨折切开复位钢板内固定术;腓骨骨折闭合复位髓内针内固定术
1845	D07儿童骨科、骨盆外科	2023-01-26	2023-01-30	3325970	徐荧	女	10Y	桡骨颈骨折		治愈	张敬东	易先宏	方明桥	桡骨骨折闭合复位髓内针内固定术
1846	D07儿童骨科、骨盆外科	2023-01-23	2023-01-31	3326571	吴方达	男	68Y	股骨颈骨折	下肢动脉粥样硬化;冠状动脉支架植入后状态;后天性肾囊肿;前列腺结石;高血压病	治愈	孔建中	方文来	陈墨川	股骨骨折闭合复位螺钉内固定术
1847	D07儿童骨科、骨盆外科	2023-01-23	2023-01-31	3326809	徐阿柳	女	84Y	股骨粗隆间骨折	高血压病;脑卒中后遗症	治愈	翁益民	翁益民	项光恒	股骨骨折闭合复位髓内针内固定术
1848	D07儿童骨科、骨盆外科	2023-01-19	2023-02-01	3326871	陈菜花	女	79Y	股骨颈骨折	2型糖尿病;高血压病	治愈	翁益民	翁益民	项光恒	人工双动股骨头置换术
1849	D07儿童骨科、骨盆外科	2023-01-28	2023-02-01	3326980	张友銮	男	13Y	取除骨折内固定装置		其他	张敬东	李玉安	王伟	股骨内固定物取出术
1850	D07儿童骨科、骨盆外科	2023-01-28	2023-02-01	3326982	夏肇哲	男	14Y	取除骨折内固定装置		其他	张敬东	闫广奎	王伟	尺骨内固定物取出术
1851	D07儿童骨科、骨盆外科	2023-01-28	2023-02-01	3326999	汤甜甜	女	15Y	取除骨折内固定装置		其他	张敬东	李玉安	王伟	胫骨内固定物取出术
1852	D07儿童骨科、骨盆外科	2023-01-28	2023-02-01	3327005	吴嘉豪	男	10Y	取除骨折内固定装置		其他	孔建中	闫广奎	闫广奎	胫骨内固定物取出术
1853	D07儿童骨科、骨盆外科	2023-01-11	2023-02-01	3327024	刘秀来	男	65Y	跟骨骨折	肝内胆管结石;下肢动脉粥样硬化;心脏瓣膜病	好转	孔建中	陈墨川	方文来	创面负压封闭引流[VSD];跟骨人工骨植骨术;关节软骨修复术;跟骨骨折切开复位钢板内固定术
1854	D07儿童骨科、骨盆外科	2023-01-22	2023-02-01	3327038	叶菊花	女	78Y	股骨粗隆间骨折	高血压病	治愈	翁益民	翁益民	项光恒	股骨骨折闭合复位髓内针内固定术
1855	D07儿童骨科、骨盆外科	2023-01-29	2023-02-01	3327043	王子旭	男	2Y	取除骨折内固定装置		其他	孔建中	闫广奎	闫广奎	股骨内固定物取出术
1856	D07儿童骨科、骨盆外科	2023-01-28	2023-02-01	3327052	班宇航	男	4Y	取除骨折内固定装置		其他	孔建中	闫广奎	闫广奎	股骨内固定物取出术
1857	D07儿童骨科、骨盆外科	2022-12-12	2023-02-01	3327067	晏刚勇	男	25Y	开放性胫骨骨干骨折	腹水;胸腔积液;开放性小腿特指部位损伤;脂肪肝;腰椎和骨盆多处骨折;双踝骨折;多发性肋骨骨折	治愈	孔建中	陈墨川	方文来	创面负压封闭引流[VSD];皮肤和皮下坏死组织切除清创术;骨盆骨折切开复位钢板内固定术;关节软骨修复术;踝关节骨折切开复位钢板内固定术;胫骨骨折切开复位钢板内固定术;皮肤缝合术;水泥间隔物置入术
1858	D07儿童骨科、骨盆外科	2023-01-26	2023-02-01	3327076	黄子宣	男	1Y	开放性特指指骨骨折	开放性手指损伤伴指甲损害	好转	张敬东	闫广奎	方明桥	皮肤和皮下组织非切除性清创;甲成形术;指骨骨折切开复位钢针内固定术
1859	D07儿童骨科、骨盆外科	2023-01-30	2023-02-02	3327579	罗子懿	女	6Y	取除骨折内固定装置		其他	张敬东	李玉安	王伟	尺骨内固定物取出术
1860	D07儿童骨科、骨盆外科	2023-01-31	2023-02-02	3327608	李曦	女	5Y	取除骨折内固定装置		其他	孔建中	李玉安	闫广奎	股骨内固定物取出术
1861	D07儿童骨科、骨盆外科	2023-01-30	2023-02-02	3327651	陈忠豪	男	15Y	取除骨折内固定装置		其他	张敬东	易先宏	王伟	尺骨内固定物取出术
1862	D07儿童骨科、骨盆外科	2023-01-30	2023-02-02	3327671	章鋆	男	11Y	取除骨折内固定装置		其他	张敬东	李玉安	方明桥	股骨内固定物取出术
1863	D07儿童骨科、骨盆外科	2023-01-28	2023-02-02	3327679	蒋梓杰	男	12Y	甲沟炎	创伤后股骨头坏死;取除骨折内固定装置	治愈	张敬东	李玉安	王伟	股骨内固定物取出术;甲成形术;拔甲术
1864	D07儿童骨科、骨盆外科	2023-01-30	2023-02-02	3327686	薛东朝	男	9Y	取除骨折内固定装置		其他	张敬东	李玉安	王伟	股骨内固定物取出术
1865	D07儿童骨科、骨盆外科	2023-01-30	2023-02-03	3328026	张佳勋	男	9Y	取除骨折内固定装置		其他	张敬东	李玉安	方明桥	股骨内固定物取出术
1866	D07儿童骨科、骨盆外科	2023-01-30	2023-02-03	3328030	李玫娇	女	2Y	肱骨髁上骨折		治愈	孔建中	李玉安	闫广奎	肱骨骨折闭合复位钢针内固定术
1867	D07儿童骨科、骨盆外科	2023-01-30	2023-02-03	3328092	诸佳琦	女	12Y	取除骨折内固定装置		其他	张敬东	闫广奎	方明桥	肱骨内固定物取出术
1868	D07儿童骨科、骨盆外科	2023-01-30	2023-02-03	3328104	王潇婷	女	13Y	取除骨折内固定装置		其他	孔建中	闫广奎	闫广奎	胫骨内固定物取出术
1869	D07儿童骨科、骨盆外科	2023-01-23	2023-02-03	3328203	吴陈玉	女	70Y	股骨干骨折		治愈	翁益民	翁益民	项光恒	股骨骨折切开复位钢板内固定术
1870	D07儿童骨科、骨盆外科	2023-01-27	2023-02-03	3328206	许书豪	男	7Y	股骨干骨折		治愈	张敬东	闫广奎	王伟	股骨骨折切开复位髓内针内固定术
1871	D07儿童骨科、骨盆外科	2023-01-23	2023-02-03	3328207	张夏香	女	81Y	闭合性胫骨平台骨折	半月板撕裂，近期的;膝关节特指部位扭伤;膝关节积液;下肢静脉血栓形成;原发性双侧膝关节病;肺萎陷;肺结节	治愈	翁益民	翁益民	项光恒	关节软骨修复术;胫骨骨折切开复位钢板内固定术
1872	D07儿童骨科、骨盆外科	2023-01-17	2023-02-03	3328217	洪建	男	31Y	髋臼骨折	桡骨头骨折;膀胱内异物;脂肪肝;急性上呼吸道感染	好转	孔建中	陈墨川	方文来	关节软骨修复术;髋骨骨折切开复位钢板内固定术
1873	D07儿童骨科、骨盆外科	2023-01-28	2023-02-03	3328220	翁永珠	女	69Y	闭合性胫骨平台骨折	高血压病;脂肪肝;肾结石;下肢动脉粥样硬化;心脏瓣膜病;肾肿物	好转	孔建中	陈墨川	方文来	关节软骨修复术;胫骨人工骨植骨术;胫骨骨折切开复位钢板内固定术
1874	D07儿童骨科、骨盆外科	2023-01-23	2023-02-03	3328226	胡碎眉	女	71Y	股骨颈骨折	高血压病;脂肪肝;后天性肾囊肿;心脏瓣膜病	好转	孔建中	陈墨川	方文来	陶瓷-陶瓷髋关节置换;全髋关节置换术
1875	D07儿童骨科、骨盆外科	2023-01-28	2023-02-03	3328237	王朱匡	男	60Y	髌骨骨折	前列腺结石;心动过缓;心脏瓣膜病	好转	孔建中	陈墨川	方文来	关节软骨修复术;髌骨骨折切开复位张力带钢丝内固定术
1876	D07儿童骨科、骨盆外科	2023-01-23	2023-02-03	3328251	肖菊花	女	40Y	跟骨骨折	脂肪肝	好转	孔建中	陈墨川	方文来	跟骨骨折切开复位钢板内固定术
1877	D07儿童骨科、骨盆外科	2023-01-25	2023-02-03	3328257	戴金菊	女	79Y	股骨颈骨折	老年性脑萎缩;脑卒中;心脏瓣膜病;脂肪肝;糖尿病;高血压病	好转	孔建中	陈墨川	方文来	人工双动股骨头置换术
1878	D07儿童骨科、骨盆外科	2023-01-28	2023-02-03	3328260	彭岛	男	30Y	桡骨头骨折	脂肪肝	好转	孔建中	陈墨川	方文来	关节软骨修复术;桡骨骨折切开复位钢板内固定术
1879	D07儿童骨科、骨盆外科	2023-01-16	2023-02-03	3328317	梅川亨	男	43Y	髋臼骨折	髌骨骨折;股骨颈骨折	好转	孔建中	陈墨川	方文来	股四头肌缝合术;关节软骨修复术;髌骨骨折切开复位张力带钢丝内固定术;髋骨骨折切开复位钢板内固定术
1880	D07儿童骨科、骨盆外科	2023-01-30	2023-02-03	3328322	张心琪	女	8Y	尺骨桡骨骨干骨折		治愈	张敬东	闫广奎	王伟	石膏绷带固定;桡骨骨折闭合复位术;尺骨骨折闭合复位髓内针内固定术
1881	D07儿童骨科、骨盆外科	2022-12-31	2023-02-03	3328551	徐瑜彤	女	13Y	跟骨骨折	骨盆骨折;胫距关节脱位;腰椎骨折;外踝骨折;骰骨骨折;骶骨骨折	治愈	张敬东	易先宏	王伟	皮肤和皮下坏死组织切除清创术;跟骨骨折切开复位钢板内固定术;股骨髁上牵引;髂骨骨折切开复位钢板内固定术
1882	D07儿童骨科、骨盆外科	2023-02-02	2023-02-04	3328647	陈丁赫	男	9Y	取除骨折内固定装置		其他	张敬东	李玉安	王伟	尺骨内固定物取出术;肱骨内固定物取出术
1883	D07儿童骨科、骨盆外科	2023-02-01	2023-02-04	3328663	陈培硕	男	13Y	取除骨折内固定装置		其他	孔建中	李玉安	闫广奎	肱骨内固定物取出术
1884	D07儿童骨科、骨盆外科	2023-02-03	2023-02-04	3328682	钱舒涵	女	2Y	肱骨髁上骨折		好转	孔建中	李玉安	闫广奎	肱骨骨折闭合复位钢针内固定术
1885	D07儿童骨科、骨盆外科	2023-02-01	2023-02-04	3328748	叶建敏	男	47Y	锁骨骨折	多发性肋骨骨折;脂肪肝;肺大泡;肺气肿	好转	孔建中	陈墨川	方文来	锁骨骨折切开复位钢板内固定术
1886	D07儿童骨科、骨盆外科	2023-01-23	2023-02-04	3328789	赵应全	男	35Y	双踝骨折	腰椎骨折;肋骨骨折;肝占位性病变;前列腺囊肿	治愈	孔建中	陈墨川	方文来	腓骨人工骨植骨术;关节软骨修复术;踝关节骨折切开复位钢板内固定术
1887	D07儿童骨科、骨盆外科	2023-01-08	2023-02-04	3328946	蒋广泰	男	29Y	闭合性胫骨平台骨折	股骨下端骨折;多发性膝关节损伤;髌骨半脱位;腓骨骨折;小腿水平腓神经损伤;髂骨骨折;耻骨骨折;特指手术后状态	治愈	翁益民	翁益民	项光恒	副韧带修补术;膝关节半月板成形术;腓骨骨折闭合复位髓内针内固定术;胫骨骨折切开复位钢板内固定术;膝关节脱位切开复位术
1888	D07儿童骨科、骨盆外科	2023-01-31	2023-02-05	3328950	金献笋	男	34Y	肢骨内固定装置机械性并发症	肱骨上端骨折;肩袖损伤;脂肪肝;肝囊肿	治愈	翁益民	翁益民	项光恒	肱骨内固定物取出术;肩袖修补术;肱骨骨折切开复位钢板内固定术
1889	D07儿童骨科、骨盆外科	2023-02-04	2023-02-05	3328988	杨德金	男	90Y	闭合性胫骨平台骨折	颈动脉硬化;下肢动脉粥样硬化	未愈	孔建中	陈墨川	方文来
1890	D07儿童骨科、骨盆外科	2023-01-28	2023-02-07	3329166	陈阿莲	女	70Y	髌骨骨折	高血压病;2型糖尿病;心脏瓣膜病;肝内胆管结石;肾结石;完全性右束支传导阻滞	好转	孔建中	陈墨川	方文来	髌骨骨折切开复位张力带钢丝内固定术;关节软骨修复术
1891	D07儿童骨科、骨盆外科	2023-01-13	2023-02-07	3329167	许上银	男	55Y	闭合性胫骨平台骨折		好转	孔建中	陈墨川	方文来	骨空隙填补物置入术;皮肤和皮下坏死组织切除清创术;胫骨人工骨植骨术;膝关节半月板成形术;胫骨骨折切开复位钢板内固定术
1892	D07儿童骨科、骨盆外科	2023-02-06	2023-02-08	3329350	陈炳昕	男	6Y	肱骨髁上骨折		好转	张敬东	易先宏	方明桥	肱骨骨折闭合复位钢针内固定术
1893	D07儿童骨科、骨盆外科	2023-01-27	2023-02-11	3329650	金满青	女	67Y	股骨颈骨折	老年性髋关节病;老年性骨质疏松;多发性肝囊肿;下肢动脉粥样硬化;下肢静脉曲张	治愈	翁益民	翁益民	项光恒	陶瓷-陶瓷髋关节置换;全髋关节置换术
1894	D07儿童骨科、骨盆外科	2023-01-18	2023-02-11	3329686	刘晨	男	4Y	趾伸肌腱断裂	创伤性骨筋膜室综合征;踝和足特指部位挤压伤;跖骨骨折;开放性足损伤	好转	张敬东	李玉安	方明桥	创面负压封闭引流[VSD];(足母)长伸肌腱缝合术;皮肤和皮下组织非切除性清创;趾肌腱缝合术;筋膜间隙切开减压术
1895	D07儿童骨科、骨盆外科	2023-01-28	2023-02-12	3329975	李旭雄	男	51Y	跟骨骨折	肝囊肿;脾囊肿;肝钙化灶;二尖瓣关闭不全	治愈	孔建中	陈墨川	方文来	创面负压封闭引流[VSD];跟骨人工骨植骨术;关节软骨修复术;跟骨骨折切开复位钢板内固定术
1896	D07儿童骨科、骨盆外科	2023-01-25	2023-02-13	3330274	袁俊驰	男	6Y	开放性胫腓骨干骨折		治愈	张敬东	闫广奎	方明桥	胫骨外固定架固定术;胫骨骨折切开复位钢针内固定术
1897	D07儿童骨科、骨盆外科	2023-02-03	2023-02-13	3330293	朱栩森子	男	15Y	胫骨上端骨折		治愈	张敬东	易先宏	方明桥	胫骨骨折切开复位螺钉内固定术
1898	D07儿童骨科、骨盆外科	2023-01-30	2023-02-13	3330299	林传进	男	53Y	胸椎骨折	肺挫伤;头皮裂伤;下肢静脉血栓形成;腰椎间盘突出;肝囊肿;后天性肾囊肿;胆囊结石;乙型病毒性肝炎;肺结节;股骨干骨折;肩胛骨骨折;多发性肋骨骨折;颈椎间盘突出	好转	孔建中	陈墨川	方文来	椎弓根钉内固定术;2-3块椎骨融合;腰骶外侧横突融合术;下腔静脉滤器取出术;股静脉穿刺术;股骨骨折闭合复位髓内针内固定术;下腔静脉滤器置入术
1899	D07儿童骨科、骨盆外科	2023-02-06	2023-02-14	3330672	王若依	女	6Y	胫骨骨干骨折	头部多处浅表损伤	治愈	孔建中	闫广奎	闫广奎	胫骨骨折闭合复位髓内针内固定术
1900	D07儿童骨科、骨盆外科	2023-02-08	2023-02-14	3330705	章艺馨	女	7Y	胫骨上端骨折		治愈	孔建中	李玉安	闫广奎	关节软骨修复术;胫骨骨折切开复位螺钉内固定术
1901	D07儿童骨科、骨盆外科	2023-02-09	2023-02-14	3330711	刘智彬	男	8Y	桡骨下端骨折		治愈	孔建中	闫广奎	闫广奎	桡骨骨折闭合复位钢针内固定术
1902	D07儿童骨科、骨盆外科	2023-02-06	2023-02-14	3330761	孙云枫	男	9Y	胫骨上端骨折	膝关节积液;头皮血肿	治愈	张敬东	易先宏	王伟	膝关节镜检查;胫骨骨折闭合复位螺钉内固定术
1903	D07儿童骨科、骨盆外科	2023-01-28	2023-02-14	3330860	严恒立	女	40Y	肱骨外科颈骨折	枕骨骨折;创伤性硬膜下出血;创伤性蛛网膜下腔出血;头皮血肿;面部软组织挫伤;后天性肾囊肿;胆囊结石	治愈	翁益民	翁益民	项光恒	肱骨骨折切开复位钢板内固定术
1904	D07儿童骨科、骨盆外科	2023-01-28	2023-02-15	3330989	江双凤	女	68Y	胫骨上端骨折	掌骨骨折;下肢动脉粥样硬化;二尖瓣及主动脉瓣关闭不全	好转	孔建中	陈墨川	方文来	胫骨人工骨植骨术;关节软骨修复术;胫骨骨折切开复位钢板内固定术
1905	D07儿童骨科、骨盆外科	2023-02-11	2023-02-15	3331008	黄思佳	女	12Y	取除骨折内固定装置		其他	张敬东	闫广奎	王伟	踝关节内固定物取出术
1906	D07儿童骨科、骨盆外科	2023-02-11	2023-02-15	3331022	郑意璇	女	10Y	尺骨良性肿瘤	取除骨折内固定装置	治愈	张敬东	李玉安	王伟	尺骨内固定物取出术;尺骨病损切除术
1907	D07儿童骨科、骨盆外科	2023-02-11	2023-02-15	3331246	洪锐萍	女	9Y	取除骨折内固定装置		其他	孔建中	闫广奎	方明桥	桡骨内固定物取出术
1908	D07儿童骨科、骨盆外科	2023-02-11	2023-02-16	3331540	苏欣怡	女	9Y	取除骨折内固定装置		其他	孔建中	李玉安	闫广奎	腓骨内固定物取出术
1909	D07儿童骨科、骨盆外科	2023-02-11	2023-02-16	3331586	林鍫鍫	男	10Y	取除骨折内固定装置		其他	张敬东	李玉安	王伟	肱骨内固定物取出术
1910	D07儿童骨科、骨盆外科	2023-02-11	2023-02-16	3331589	范语菲	女	4Y	取除骨折内固定装置		其他	张敬东	李玉安	王伟	股骨内固定物取出术
1911	D07儿童骨科、骨盆外科	2023-02-09	2023-02-16	3331748	林孝表	男	45Y	髌骨骨折	后天性肾囊肿	好转	孔建中	陈墨川	方文来	关节软骨修复术;股四头肌缝合术;髌骨骨折切开复位张力带钢丝内固定术
1912	D07儿童骨科、骨盆外科	2023-02-11	2023-02-17	3331924	苏海燕	女	46Y	胫骨下端骨折		治愈	翁益民	翁益民	项光恒	胫骨骨折切开复位钢板内固定术
1913	D07儿童骨科、骨盆外科	2022-12-30	2023-02-18	3332115	周风雨	男	45Y	股骨粗隆间骨折	股骨干骨折;下肢特指深部脉管静脉炎和血栓性静脉炎;肱骨上端骨折;胫腓骨干骨折;胫骨下端骨折;跟骨骨折;脂肪肝;胆囊结石伴慢性胆囊炎	治愈	孔建中	方文来	陈墨川	下腔静脉滤器取出术;深静脉穿刺;股骨骨折切开复位髓内针内固定术;肩关节脱位闭合复位术;肩袖修补术;肱骨骨折切开复位螺钉内固定术;下腔静脉滤器置入术
1914	D07儿童骨科、骨盆外科	2023-02-14	2023-02-18	3332118	林欣然	女	5Y	取除骨折内固定装置		其他	张敬东	闫广奎	方明桥	胫骨内固定物取出术;股骨内固定物取出术
1915	D07儿童骨科、骨盆外科	2023-02-10	2023-02-18	3332160	吴旭智	男	34Y	桡骨下端骨折		治愈	王振文	水小龙	218241	桡骨骨折切开复位钢板内固定术
1916	D07儿童骨科、骨盆外科	2023-02-15	2023-02-18	3332161	王冬香	女	71Y	肩关节脱位	肱骨上端骨折;高血压病;脂肪肝	好转	陈华	孙辽军	王特	肩关节脱位闭合复位术
1917	D07儿童骨科、骨盆外科	2023-02-08	2023-02-18	3332164	王小孩	女	47Y	闭合性胫骨平台骨折	多发性膝关节损伤;脂肪肝;肝囊肿;特指心律失常	好转	孔建中	陈墨川	方文来	关节软骨修复术;胫骨人工骨植骨术;胫骨骨折切开复位钢板内固定术
1918	D07儿童骨科、骨盆外科	2023-02-13	2023-02-18	3332170	沈建宗	男	52Y	取除骨折内固定装置		其他	翁益民	翁益民	项光恒	胫骨内固定物取出术
1919	D07儿童骨科、骨盆外科	2023-02-14	2023-02-19	3332630	南依依	女	7Y	取除骨折内固定装置	股骨头无菌性坏死	其他	张敬东	李玉安	方明桥	股骨内固定物取出术
1920	D07儿童骨科、骨盆外科	2023-02-08	2023-02-19	3332647	黄秀飞	女	50Y	外踝骨折	胫骨下端骨折	治愈	翁益民	翁益民	项光恒	踝关节骨折切开复位钢板内固定术
1921	D07儿童骨科、骨盆外科	2023-02-02	2023-02-19	3332692	翁珠娥	女	83Y	股骨粗隆间骨折	心脏瓣膜病;颈动脉硬化;下肢动脉粥样硬化;胸腔积液;房性早搏;肱骨外科颈骨折;肩关节脱位;多发性肋骨骨折;脑卒中后遗症;高血压病;后天性肾囊肿	好转	孔建中	陈墨川	方文来	肩关节成形术;人工肱骨头置换术;股骨骨折闭合复位螺钉内固定术
1922	D07儿童骨科、骨盆外科	2023-02-09	2023-02-20	3333072	陈旭丹	女	47Y	胫腓骨干骨折	肝钙化灶;胆囊胆固醇沉着症	好转	孔建中	陈墨川	方文来	腓骨骨折闭合复位髓内针内固定术;胫骨骨折切开复位钢板内固定术
1923	D07儿童骨科、骨盆外科	2023-02-14	2023-02-20	3333255	颜语恋	女	11Y	尺骨桡骨骨干骨折		治愈	张敬东	易先宏	方明桥	石膏绷带固定;尺骨骨折闭合复位术;桡骨骨折切开复位髓内针内固定术
1924	D07儿童骨科、骨盆外科	2023-02-09	2023-02-21	3333419	周万飞	女	45Y	胫骨骨干骨折	肝钙化灶;胆囊结石;肾错构瘤;肺结节	好转	孔建中	陈墨川	方文来	胫骨骨折切开复位钢板内固定术
1925	D07儿童骨科、骨盆外科	2023-02-17	2023-02-21	3333437	陈新宇	男	4Y	取除骨折内固定装置		其他	孔建中	易先宏	闫广奎	股骨内固定物取出术
1926	D07儿童骨科、骨盆外科	2023-02-10	2023-02-21	3333445	林冬弟	女	67Y	跟骨骨折	2型糖尿病;腰椎骨折;脂肪肝;腰椎间盘突出	治愈	陈龙	应晓洲	应晓洲	腰椎骨折球囊扩张成形术;经皮穿刺椎体成形术;跟骨骨折切开复位螺钉内固定术
1927	D07儿童骨科、骨盆外科	2023-02-11	2023-02-22	3333857	赵崇参	男	23Y	鹰嘴骨折	脂肪肝	好转	孔建中	陈墨川	方文来	尺骨骨折切开复位钢板内固定术
1928	D07儿童骨科、骨盆外科	2023-02-10	2023-02-22	3333877	陈玉秋	女	50Y	肩胛骨骨折	特指腕骨骨折;肝囊肿;胆囊息肉	好转	孔建中	陈墨川	方文来	肩关节成形术;肩胛骨骨折切开复位螺钉内固定术
1929	D07儿童骨科、骨盆外科	2023-02-18	2023-02-22	3333880	洪志皓	男	8Y	肱骨髁上骨折		治愈	张敬东	李玉安	方明桥	肱骨骨折闭合复位钢针内固定术
1930	D07儿童骨科、骨盆外科	2023-02-12	2023-02-23	3334347	徐本妹	女	58Y	三踝骨折	2型糖尿病;高血压病;胆囊结石;特指手术后状态;胰腺切除术后状态	治愈	翁益民	翁益民	项光恒	关节软骨修复术;踝关节骨折切开复位钢板内固定术
1931	D07儿童骨科、骨盆外科	2023-02-06	2023-02-23	3334369	王孙华	女	69Y	闭合性胫骨平台骨折	胫骨下端骨折;尺骨桡骨远端骨折;特指腕骨骨折;头皮血肿;多发性脑梗死;肝囊肿;胆囊结石;后天性肾囊肿;腰椎退行性病变	治愈	翁益民	翁益民	项光恒	胫骨骨折切开复位钢板内固定术;桡骨外固定架固定术;桡骨骨折闭合复位术;尺骨骨折切开复位钢板内固定术
1932	D07儿童骨科、骨盆外科	2023-02-18	2023-02-25	3333887	周佐锟	男	4Y	肱骨髁上骨折		治愈	孔建中	李玉安	闫广奎	肱骨骨折闭合复位钢针内固定术
1933	D07儿童骨科、骨盆外科	2023-02-19	2023-02-25	3334901	叶泽轩	男	4Y	鹰嘴骨折		治愈	张敬东	李玉安	王伟	尺骨骨折切开复位钢针内固定术
1934	D07儿童骨科、骨盆外科	2023-02-18	2023-02-25	3334904	黄心悦	女	5Y	鹰嘴骨折	肱骨外髁骨折	治愈	张敬东	李玉安	王伟	肱骨骨折闭合复位钢针内固定术;尺骨骨折切开复位钢针内固定术
1935	D07儿童骨科、骨盆外科	2023-02-17	2023-02-25	3334906	高黎形	男	22Y	股骨髁骨折	膝关节副韧带扭伤;膝关节积液	治愈	翁益民	翁益民	项光恒	副韧带修补术;股骨骨折切开复位螺钉内固定术
1936	D07儿童骨科、骨盆外科	2023-02-16	2023-02-25	3334910	李旭鲜	女	52Y	闭合性胫骨平台骨折	多发性膝关节损伤;下肢静脉血栓形成;心脏瓣膜病	好转	孔建中	陈墨川	方文来	膝后十字韧带重建术;关节软骨修复术;胫骨骨折切开复位钢板内固定术
1937	D07儿童骨科、骨盆外科	2023-02-20	2023-02-25	3335158	朱富兰	女	78Y	股骨颈骨折	高血压病;后天性肾囊肿;下肢动脉粥样硬化;主动脉瓣关闭不全;室性早搏	好转	孔建中	陈墨川	方文来	陶瓷-陶瓷髋关节置换;全髋关节置换术
1938	D07儿童骨科、骨盆外科	2023-02-19	2023-02-26	3334944	王家举	男	54Y	取除骨折内固定装置	骨化性肌炎;脾大;前列腺增生	其他	翁益民	翁益民	项光恒	肱骨内固定物取出术
1939	D07儿童骨科、骨盆外科	2023-02-15	2023-02-26	3335382	姜宝珠	女	73Y	股骨颈骨折	骨质疏松;高血压病;脂肪肝;主动脉瓣关闭不全;颈动脉硬化;下肢动脉粥样硬化;下肢静脉血栓形成	好转	孔建中	陈墨川	方文来	陶瓷-陶瓷髋关节置换;全髋关节置换术
1940	D07儿童骨科、骨盆外科	2023-02-16	2023-02-26	3335510	李荣娇	女	62Y	股骨颈骨折	骨质疏松;高血压病;脂肪肝;下肢动脉粥样硬化;肾结石	好转	孔建中	陈墨川	方文来	陶瓷-陶瓷髋关节置换;全髋关节置换术
1941	D07儿童骨科、骨盆外科	2023-02-22	2023-02-26	3335522	潘统娒	男	88Y	股骨颈骨折	颈动脉硬化;心脏瓣膜病;肺气肿;前列腺恶性肿瘤;后天性肾囊肿;肺部感染;肝囊肿;前列腺结石;前列腺增生;下肢动脉粥样硬化	未愈	孔建中	陈墨川	方文来
1942	D07儿童骨科、骨盆外科	2023-02-15	2023-02-27	3335800	沈尔涵	男	4Y	股骨干骨折		治愈	张敬东	易先宏	王伟	股骨骨折闭合复位髓内针内固定术
1943	D07儿童骨科、骨盆外科	2023-02-26	2023-02-27	3335855	陈品言	男	5Y	肱骨髁上骨折		治愈	张敬东	易先宏	方明桥	肱骨骨折闭合复位钢针内固定术
1944	D07儿童骨科、骨盆外科	2023-02-22	2023-02-27	3335922	张家辉	男	13Y	取除骨折内固定装置		其他	张敬东	易先宏	方明桥	胫骨内固定物取出术
1945	D07儿童骨科、骨盆外科	2023-02-13	2023-02-27	3335941	王乃茂	男	80Y	手术后切口感染	乙型肝炎小三阳;心脏瓣膜病;高血压病;取除骨折内固定装置	治愈	翁益民	翁益民	项光恒	胫骨内固定物取出术;皮肤和皮下坏死组织切除清创术
1946	D07儿童骨科、骨盆外科	2023-02-22	2023-02-27	3336065	冉林晞	女	5Y	取除骨折内固定装置		其他	张敬东	易先宏	方明桥	胫骨内固定物取出术
1947	D07儿童骨科、骨盆外科	2023-02-19	2023-02-28	3334955	肖云球	男	56Y	取除骨折内固定装置	前列腺结石	其他	翁益民	翁益民	项光恒	跟骨内固定物取出术
1948	D07儿童骨科、骨盆外科	2023-02-23	2023-02-28	3336272	王炳华	男	64Y	腰椎骨折	骨质疏松;肝囊肿;脂肪肝;腰椎间盘突出;下肢静脉血栓形成;前列腺增生;前列腺结石	治愈	林焱	林焱	陈教想	腰椎骨折球囊扩张成形术;经皮穿刺椎体成形术
1949	D07儿童骨科、骨盆外科	2023-02-20	2023-03-01	3336606	张祥和	男	6Y	股骨颈骨折	耻骨骨折	治愈	张敬东	易先宏	王伟	股骨骨折闭合复位螺钉内固定术
1950	D07儿童骨科、骨盆外科	2023-02-20	2023-03-01	3336666	曾子轩	男	7Y	胫腓骨下端骨折		好转	张敬东	李玉安	王伟	胫骨骨折切开复位钢板内固定术
1951	D07儿童骨科、骨盆外科	2023-02-12	2023-03-01	3336668	林秋月	女	63Y	股骨颈骨折	高血压病;胸腔积液;脂肪肝;2型糖尿病;骨折治疗后恢复期;多发性肋骨骨折	治愈	翁益民	翁益民	项光恒	全髋关节置换术;陶瓷-陶瓷髋关节置换
1952	D07儿童骨科、骨盆外科	2023-02-09	2023-03-01	3336673	郑君昊	男	14Y	胫腓骨干骨折		治愈	翁益民	翁益民	项光恒	胫骨骨折切开复位钢板内固定术
1953	D07儿童骨科、骨盆外科	2023-02-26	2023-03-01	3336694	任宝仪	女	1Y	肱骨髁上骨折		治愈	孔建中	闫广奎	王伟	肱骨骨折闭合复位钢针内固定术
1954	D07儿童骨科、骨盆外科	2023-02-27	2023-03-01	3336765	刘海波	男	34Y	取除骨折内固定装置	肾结石;前列腺结石;胆囊息肉;脂肪肝	其他	孔建中	陈墨川	方文来	跗骨内固定物取出术
1955	D07儿童骨科、骨盆外科	2023-02-21	2023-03-02	3337185	潘德有	男	61Y	髌骨骨折	胆囊息肉;肺部感染;肺结节;颈动脉硬化;下肢特指深部脉管静脉炎和血栓性静脉炎;胆囊结石;高血压病	好转	孔建中	陈墨川	方文来	股四头肌缝合术;关节软骨修复术;髌骨骨折切开复位张力带钢丝内固定术
1956	D07儿童骨科、骨盆外科	2023-02-15	2023-03-04	3337574	倪丽红	女	87Y	股骨粗隆间骨折	肾衰竭;骨质疏松;心功能不全;心脏瓣膜病;肺结节;后天性肾囊肿;下肢动脉粥样硬化;胆囊结石;Ⅰ度房室传导阻滞;高血压病;2型糖尿病;胸腔积液	好转	孔建中	陈墨川	方文来	股骨骨折切开复位髓内针内固定术;股骨人工骨植骨术
1957	D07儿童骨科、骨盆外科	2023-02-22	2023-03-04	3337575	黄根牙	男	44Y	三踝骨折	足特指部位脱位;胆囊结石;脂肪肝	好转	孔建中	陈墨川	方文来	踝关节骨折切开复位钢板内固定术;关节软骨修复术
1958	D07儿童骨科、骨盆外科	2023-02-21	2023-03-04	3337585	尚仁叶	女	47Y	髌骨骨折	头皮开放性伤口	好转	孔建中	陈墨川	方文来	髌韧带缝合术;关节软骨修复术;髌骨骨折切开复位张力带钢丝内固定术
1959	D07儿童骨科、骨盆外科	2023-02-21	2023-03-04	3337587	陶仁波	男	48Y	锁骨骨折	左前分支传导阻滞;房性早搏;踝关节扭伤;胆囊息肉;脂肪肝	好转	孔建中	陈墨川	方文来	锁骨骨折切开复位钢板内固定术;锁骨人工骨植骨术
1960	D07儿童骨科、骨盆外科	2023-02-21	2023-03-04	3337589	陈庆绒	男	37Y	桡骨干骨折	脂肪肝;腕关节脱位	好转	孔建中	陈墨川	方文来	腕关节脱位闭合复位术;桡骨人工骨植骨术;桡骨骨折切开复位钢板内固定术
1961	D07儿童骨科、骨盆外科	2023-02-27	2023-03-04	3337608	陈灏	男	13Y	胫骨下端骨折		好转	孔建中	李玉安	王伟	胫骨骨折闭合复位螺钉内固定术
1962	D07儿童骨科、骨盆外科	2023-01-28	2023-03-04	3337615	刘新全	男	63Y	胫腓骨下端骨折	多发性小腿浅表损伤;心脏瓣膜病;腰椎间盘突出;完全性右束支传导阻滞;高血压病;前列腺结石;前列腺增生;肝囊肿;颈动脉硬化	好转	孔建中	陈墨川	方文来	胫骨骨折切开复位钢板内固定术;腓骨骨折切开复位钢板内固定术
1963	D07儿童骨科、骨盆外科	2023-02-28	2023-03-04	3337618	杨宣来	男	38Y	掌骨骨折	前列腺结石	好转	孔建中	陈墨川	方文来	掌骨骨折切开复位钢板内固定术
1964	D07儿童骨科、骨盆外科	2023-02-26	2023-03-04	3337621	金芬媚	女	50Y	外踝骨折	后天性肾囊肿;下肢动脉粥样硬化;高血压病;2型糖尿病;踝关节半脱位;脂肪肝	好转	孔建中	陈墨川	方文来	踝关节骨折切开复位钢板内固定术
1965	D07儿童骨科、骨盆外科	2023-02-20	2023-03-04	3337624	游定财	男	86Y	股骨干骨折	椎间盘膨隆;脊椎退行性病变;胆囊结石;左房扩大;心房颤动;主动脉瓣关闭不全;高血压病;2型糖尿病;脊椎前移;前列腺结石;前列腺增生;肝囊肿;后天性肾囊肿;下肢动脉粥样硬化	治愈	翁益民	翁益民	项光恒	股骨骨折切开复位钢板内固定术
1966	D07儿童骨科、骨盆外科	2023-02-13	2023-03-04	3337660	缪存成	男	64Y	胫腓骨干骨折	脂肪肝;高血压Ⅱ期;胆囊胆固醇沉着症;强直性脊柱炎;多发性小腿浅表损伤	治愈	翁益民	翁益民	项光恒	腓骨骨折闭合复位髓内针内固定术;胫骨骨折切开复位钢板内固定术
1967	D07儿童骨科、骨盆外科	2023-02-26	2023-03-05	3338128	张思邈	男	5Y	股骨干骨折		治愈	孔建中	李玉安	王伟	股骨骨折闭合复位髓内针内固定术
1968	D07儿童骨科、骨盆外科	2023-02-17	2023-03-05	3338172	谭胜阳	男	9Y	开放性股骨下端骨折	在大腿水平的后部肌群和肌腱损伤;股四头肌腱断裂	好转	张敬东	王伟	王伟	股四头肌缝合术;皮肤和皮下组织非切除性清创;股骨骨折切开复位螺钉内固定术;创面负压封闭引流[VSD]
1969	D07儿童骨科、骨盆外科	2023-02-27	2023-03-05	3338187	李若羽	男	11Y	鹰嘴骨折		好转	孔建中	李玉安	王伟	尺骨骨折切开复位钢针内固定术
1970	D07儿童骨科、骨盆外科	2023-02-23	2023-03-05	3338262	郑坤	男	15Y	髂骨骨折	血管瘤	治愈	翁益民	翁益民	项光恒	髂骨骨折切开复位螺钉内固定术
1971	D07儿童骨科、骨盆外科	2023-02-23	2023-03-05	3338271	周星丹	女	56Y	肱骨上端骨折	高血压病;肩关节脱位;脂肪肝;乙型病毒性肝炎;肩袖损伤	治愈	翁益民	翁益民	项光恒	肱骨骨折切开复位钢板内固定术;肩袖修补术
1972	D07儿童骨科、骨盆外科	2023-02-23	2023-03-05	3338275	张东楣	女	75Y	股骨颈骨折	后天性肾囊肿;主动脉钙化	治愈	翁益民	翁益民	项光恒	人工双动股骨头置换术
1973	D07儿童骨科、骨盆外科	2023-03-03	2023-03-06	3338676	赖俊彤	女	2Y	肱骨髁上骨折		好转	张敬东	闫广奎	方明桥	肱骨骨折闭合复位钢针内固定术
1974	D07儿童骨科、骨盆外科	2023-02-19	2023-03-06	3338704	张好	女	5Y	胫腓骨下端骨折	足挤压伤	治愈	张敬东	易先宏	王伟	胫骨骨折闭合复位髓内针内固定术
1975	D07儿童骨科、骨盆外科	2023-03-02	2023-03-06	3338708	陈明睿	男	5Y	创伤性多个足趾切断	特指趾骨骨折	治愈	张敬东	李玉安	王伟	残端修正术;趾骨骨折切开复位钢针内固定术
1976	D07儿童骨科、骨盆外科	2023-02-28	2023-03-06	3338716	南志平	女	64Y	闭合性胫骨平台骨折	半月板撕裂，近期的;二尖瓣返流	好转	孔建中	陈墨川	方文来	胫骨骨折切开复位钢板内固定术;膝关节半月板成形术;胫骨人工骨植骨术
1977	D07儿童骨科、骨盆外科	2023-02-27	2023-03-07	3339120	徐梓豪	男	2Y	胫腓骨干骨折	足挫伤;跖骨骨折	治愈	张敬东	李玉安	王伟	胫骨骨折闭合复位髓内针内固定术;跖骨骨折切开复位钢针内固定术
1978	D07儿童骨科、骨盆外科	2023-03-01	2023-03-07	3339126	陈金瑞	男	9Y	内踝骨折		治愈	张敬东	李玉安	王伟	踝关节骨折闭合复位钢针内固定术
1979	D07儿童骨科、骨盆外科	2023-02-25	2023-03-08	3339520	肖高博	男	11Y	胫腓骨下端骨折	踝和足特指浅表损伤;跖骨骨折	治愈	翁益民	翁益民	项光恒	腓骨骨折切开复位钢板内固定术;胫骨骨折闭合复位螺钉内固定术
1980	D07儿童骨科、骨盆外科	2023-02-26	2023-03-08	3339523	叶彩弟	女	86Y	股骨粗隆间骨折	后天性肾囊肿;膝关节病;高血压病;肺部感染;糖尿病	治愈	翁益民	翁益民	项光恒	股骨骨折闭合复位髓内针内固定术
1981	D07儿童骨科、骨盆外科	2023-03-06	2023-03-08	3339866	陈上松	男	47Y	桡骨干骨折	后天性肾囊肿;前列腺结石;肝囊肿;肺结节	好转	孔建中	陈墨川	方文来	桡骨骨折闭合复位髓内针内固定术
1982	D07儿童骨科、骨盆外科	2023-02-22	2023-03-09	3339997	林阿媚	女	82Y	股骨粗隆间骨折	后天性肾囊肿;非风湿性主动脉瓣关闭不全;脂肪肝	好转	孔建中	陈墨川	方文来	股骨骨折闭合复位螺钉内固定术
1983	D07儿童骨科、骨盆外科	2023-02-28	2023-03-09	3340009	李志灯	男	26Y	股骨干骨折	不完全性右束支传导阻滞	好转	孔建中	陈墨川	方文来	股骨骨折闭合复位髓内针内固定术
1984	D07儿童骨科、骨盆外科	2023-03-06	2023-03-09	3340094	郑碎唐	男	69Y	取除骨折内固定装置	高血压病;胆囊息肉;脂肪肝;乙型病毒性肝炎	其他	翁益民	翁益民	项光恒	胫骨内固定物取出术
1985	D07儿童骨科、骨盆外科	2023-02-25	2023-03-09	3340232	李建福	男	58Y	尺骨上端骨折	锁骨下动脉粥样硬化;肘关节脱位;肱骨下端骨折;前列腺结石;前列腺增生;脂肪肝;肺大泡;甲状腺囊肿;后天性肾囊肿;桡骨上端骨折;颈动脉硬化	好转	孔建中	陈墨川	方文来	尺骨骨折切开复位钢板内固定术;桡骨骨折切开复位钢针内固定术;肱骨骨折切开复位螺钉内固定术;上肢关节囊缝合术
1986	D07儿童骨科、骨盆外科	2023-02-28	2023-03-09	3340237	许湘兰	女	86Y	股骨颈骨折	颈动脉硬化;下肢动脉粥样硬化;脑梗死后遗症;完全性右束支传导阻滞;高血压病	好转	孔建中	陈墨川	方文来	人工双动股骨头置换术
1987	D07儿童骨科、骨盆外科	2023-03-06	2023-03-10	3340282	郑梓涵	女	3Y	肱骨髁上骨折		好转	孔建中	李玉安	王伟	肱骨骨折闭合复位钢针内固定术
1988	D07儿童骨科、骨盆外科	2023-03-06	2023-03-11	3340462	吴碎会	男	46Y	躯干皮肤和皮下组织良性脂肪瘤样肿瘤	皮脂腺囊肿;下肢脂肪瘤;高血压病;取除骨折内固定装置	治愈	翁益民	翁益民	项光恒	肩锁关节内固定物取出术;皮下组织病损切除术
1989	D07儿童骨科、骨盆外科	2023-03-06	2023-03-11	3340536	季一康	男	56Y	取除骨折内固定装置	后天性肾囊肿;肾结石;肝囊肿;脂肪肝	其他	翁益民	翁益民	项光恒	胫骨内固定物取出术;腓骨内固定物取出术
1990	D07儿童骨科、骨盆外科	2023-03-04	2023-03-11	3340554	何香娒	女	94Y	股骨粗隆间骨折	下肢动脉粥样硬化;老年性心脏瓣膜病;胆囊结石;盆腔肿物;肺气肿;下肢静脉血栓形成;肺结节	好转	孔建中	陈墨川	方文来	股骨骨折闭合性复位术不伴内固定;股骨使用外固定装置
1991	D07儿童骨科、骨盆外科	2023-03-07	2023-03-12	3341011	毛振业	男	14Y	肱骨下端骨折		好转	孔建中	陈墨川	方文来	肱骨骨折切开复位钢针内固定术
1992	D07儿童骨科、骨盆外科	2023-03-03	2023-03-12	3341073	戴宁将	男	35Y	掌骨骨折		治愈	翁益民	翁益民	项光恒	掌骨骨折切开复位钢板内固定术
1993	D07儿童骨科、骨盆外科	2023-02-28	2023-03-12	3341086	李时禹	男	72Y	股骨颈骨折	后天性肾囊肿;高血压病;肺大泡	治愈	翁益民	翁益民	项光恒	人工双动股骨头置换术
1994	D07儿童骨科、骨盆外科	2023-03-06	2023-03-12	3341094	林珍珠	女	52Y	肱骨上端骨折	主动脉瓣关闭不全	好转	孔建中	陈墨川	方文来	肱骨骨折切开复位钢板内固定术
1995	D07儿童骨科、骨盆外科	2022-12-30	2023-03-12	3341106	陈治均	男	33Y	开放性胫腓骨干骨折	尺骨干骨折;胫骨下端骨折;腰椎骨折;心动过速;脂肪肝;特指跗骨骨折;跟骨骨折	好转	孔建中	陈墨川	方文来	胫骨骨折切开复位钢板内固定术;尺骨骨折闭合复位髓内针内固定术;椎弓根钉内固定术;皮肤和皮下坏死组织切除清创术;骨空隙骨水泥填充术;胫骨人工骨植骨术
1996	D07儿童骨科、骨盆外科	2023-02-28	2023-03-12	3341113	鄢秀红	女	79Y	桡骨下端骨折	后天性肾囊肿;下肢动脉粥样硬化;特指主动脉瓣疾患;高血压病;双踝骨折;肝囊肿	治愈	翁益民	翁益民	项光恒	踝关节骨折切开复位钢板内固定术;桡骨骨折闭合性复位术;桡骨外固定术
1997	D07儿童骨科、骨盆外科	2023-03-07	2023-03-12	3341118	王以晨	女	11Y	肱骨下端骨折	上臂尺神经损伤;肘关节脱位;尺骨上端骨折	治愈	张敬东	方明桥	王伟	肱骨骨折切开复位钢针内固定术;关节软骨修复术
1998	D07儿童骨科、骨盆外科	2023-02-28	2023-03-12	3341122	张红	男	30Y	胫骨上端骨折	膝的多处结构的损伤;脂肪肝	好转	孔建中	陈墨川	方文来	胫骨骨折切开复位钢板内固定术;胫骨骨折闭合复位螺钉内固定术
[truncated: 13,605 more rows]
