# Supplementary material for: Variable Rate of D-dimer Predicts Venous Thromboembolism in Postoperative Fracture Patients: A Single-Center Retrospective Cohort Study
Source: Research Square preprint supplement (doi:10.21203/rs.3.rs-7878480/v1), 2025-12-09
Supplement: Supplementary file 13 [file fdbb6a763e79612e517eb82b.xlsx]

## Sheet: Sheet1
序号	出院科室	入院日期	出院日期	病案号	病人	性别	年龄	主诊断	非主诊断	转归	主任	主治	住院	手术
					姓名					情况	医师	医师	医师	名称
1	A03康复	2020-11-30	2021-01-10	3057163	杨新月	女	2Y	脑挫伤	蛛网膜下腔出血;急性支气管炎;皮炎;枕骨骨折;颅腔积气;特指听觉异常;开放性多发性损伤;急性胃肠炎	治愈	汤行录	刘婵	黄婷婷2
2	A03康复	2020-12-26	2021-01-12	3057806	干梓鑫	男	2Y	偏瘫	特指手术后状态;特指非创伤性颅内出血后遗症;癫痫;股骨干骨折	好转	汤行录	汤行录	赵凯怡
3	A03康复	2021-01-18	2021-01-26	3063335	叶紫玙	女	5Y	股骨骨折	下肢皮肤套脱伤;急性上呼吸道感染;多发性损伤	好转	汤行录	涂丰霞	黄婷婷2
4	A03康复	2021-01-01	2021-01-26	3063459	兰怡静	女	4Y	脑挫伤	颅腔积气;多发性损伤;周围性面神经麻痹;硬膜下血肿;肺挫伤;多发性颅骨骨折	好转	汤行录	涂丰霞	张晓燕
5	A03康复	2021-01-10	2021-02-13	3067992	刘俊毅	男	9Y	硬脑膜下积液	耻骨骨折;肋骨骨折;非骨化性纤维瘤;骨盆骨折;髂骨骨折;多发性损伤;锁骨骨折;多处挫伤;视神经损伤;大腿骨肿物	好转	汤行录	涂丰霞	赵凯怡
6	A03康复	2021-02-03	2021-02-16	3069051	兰沂静	女	4Y	脑挫伤	多发性损伤;周围性面神经麻痹;硬膜下血肿;多发性颅骨骨折	好转	汤行录	涂丰霞	陈珊
7	A03康复	2021-02-04	2021-02-16	3069182	杨新月	女	2Y	偏瘫	多发性损伤;颅内损伤;急性上呼吸道感染;开放性脑挫伤;枕骨骨折	好转	汤行录	刘婵	黄婷婷2
8	A03康复	2021-02-09	2021-03-15	3078081	谢墩豪	男	5Y	脑挫伤	眶骨骨折;眼睑挫伤;颞骨骨折;脑出血	好转	汤行录	刘婵	赵凯怡
9	A03康复	2021-02-03	2021-03-23	3080701	叶紫玙	女	5Y	运动障碍	急性上呼吸道感染;股骨骨折;多发性损伤;手术后恢复期	好转	汤行录	涂丰霞	黄婷婷2
10	A03康复	2021-03-10	2021-03-24	3081386	干梓鑫	男	2Y	偏瘫	癫痫;脑出血后遗症;急性上呼吸道感染;特指手术后状态;骨折治疗后恢复期	好转	汤行录	刘婵	陈珊
11	A03康复	2021-03-16	2021-03-30	3083078	杨新月	女	2Y	偏瘫	特指手术随诊医疗;枕骨骨折;脑挫伤	好转	汤行录	涂丰霞	赵凯怡
12	A03康复	2021-02-14	2021-04-07	3085599	陈铭洋	男	6Y	偏瘫	面神经麻痹;硬膜下血肿;脑挫伤;骨折;筛窦骨折;中耳炎;颞骨骨折;鼻骨骨折;眶骨骨折;眼球挫伤	好转	汤行录	涂丰霞	项炳武
13	A03康复	2021-04-07	2021-04-25	3091943	谢墩豪	男	5Y	偏瘫	多发性损伤;脑挫伤;眶骨骨折;肝功能异常;额骨骨折;颞骨骨折	好转	汤行录	刘婵	赵凯怡
14	A03康复	2021-05-05	2021-05-22	3100693	陈铭洋	男	7Y	偏瘫	面神经麻痹;特指治疗后恢复期;硬膜下血肿;脑挫伤;颅骨骨折;鼻骨骨折;眶骨骨折;筛窦骨折;眼球挫伤	好转	汤行录	涂丰霞	赵凯怡
15	A03康复	2021-03-08	2021-05-25	3101778	王磊	男	7Y	脑挫伤	肺部感染;角膜变性;眼睑闭合不全;颅骨骨折;锁骨骨折;口角炎;手术后恢复期;颅内损伤;多发性损伤;眼睑发育不全;急性上呼吸道感染;肺挫伤	治愈	汤行录	涂丰霞	赵凯怡	气管插管
16	A03康复	2021-05-19	2021-06-08	3106593	田茂江	男	2Y	特定性运动功能发育障碍	顶骨骨折;特指治疗后恢复期	好转	汤行录	涂丰霞	陈珊
17	A03康复	2021-05-16	2021-06-21	3111023	陈桂鸿	男	9Y	偏瘫	急性上呼吸道感染;多发性损伤;脑挫伤;枕骨骨折;面神经麻痹;肾结石	好转	汤行录	涂丰霞	王洋洋
18	A03康复	2021-05-25	2021-06-28	3113198	王磊	男	7Y	脑挫伤	多发性损伤;手术后恢复期;手术后随诊检查;锁骨骨折;眼睑发育不全;眼睑闭合不全;角膜变性;癫痫;急性支气管炎;颅骨骨折	好转	汤行录	涂丰霞	赵芸
19	A03康复	2021-06-19	2021-06-29	3113662	杨新月	女	2Y	偏瘫	脑挫伤;特指手术后状态;枕骨骨折	好转	汤行录	涂丰霞	王洋洋
20	A03康复	2021-06-19	2021-07-04	3115177	干梓鑫	男	2Y	偏瘫	癫痫;特指手术后状态;骨折治疗后恢复期;颅内损伤后遗症;急性上呼吸道感染	好转	汤行录	涂丰霞	赵芸
21	A03康复	2021-06-05	2021-07-12	3118089	郑安然	男	6Y	脑挫伤	气胸;遗尿;颅内出血;创伤性胸腔积液;胸部挫伤;肝损伤;桡骨骨折;多处浅表损伤;纵隔气肿;股骨骨折;褥疮;急性上呼吸道感染;头皮血肿;肺挫伤;肺出血;肺不张;颅骨骨折	好转	汤行录	涂丰霞	陈珊	股骨骨折切开复位髓内针内固定术
22	A03康复	2021-07-13	2021-07-28	3123992	陈铭洋	男	7Y	偏瘫	特指手术后状态;筛窦骨折;面神经麻痹;多发性损伤;硬膜下血肿;脑挫伤;鼻骨骨折;眶骨骨折;眼球挫伤	好转	汤行录	涂丰霞	厉晨丹
23	A03康复	2021-07-03	2021-08-03	3126065	贾子瑜	女	3Y	脑挫伤	蛛网膜下腔出血;颞骨骨折;肺挫伤;颅腔积气;多处挫伤;疱疹性咽峡炎;眶骨骨折;多发性损伤;视神经损伤;颅骨骨折;面骨骨折	好转	汤行录	刘婵	陈珊
24	A03康复	2021-07-01	2021-08-03	3126068	陈俊翰	男	1Y	脑挫伤	多发性损伤;慢性失血性贫血;上睑下垂;眶骨骨折;肺挫伤;硬脑膜下积液;颅内出血;急性上呼吸道感染;颅骨骨折	好转	汤行录	刘婵	厉晨丹
25	A03康复	2021-06-07	2021-08-08	3127885	郑诗涵	女	4Y	脑挫伤	颅底骨折;念珠菌性口炎;脑积水;创伤性蛛网膜下腔出血;癫痫;肺炎;眶骨骨折;中枢性面神经麻痹;硬膜外血肿;颅腔积气;颅骨骨折;额骨骨折;颞骨骨折;弥漫性轴索损伤	好转	汤行录	涂丰霞	赵凯怡	脑室-腹腔分流术
26	A03康复	2021-07-27	2021-08-11	3129226	陈桂鸿	男	9Y	偏瘫	多发性损伤;中枢性面神经麻痹;枕骨骨折;胃肠功能紊乱;颅骨缺损修补;肾结石;特指手术后状态	好转	陈翔	刘婵	赵凯怡
27	A03康复	2021-08-08	2021-08-24	3133616	王磊	男	7Y	脑挫伤	手术后随诊检查;角膜变性;眼睑发育不全;多发性损伤;昏迷;癫痫;眼睑闭合不全;颅骨骨折;锁骨骨折	好转	汤行录	涂丰霞	赵凯怡
28	A03康复	2021-07-27	2021-09-06	3138078	蒋擎宇	男	3Y	偏瘫	头皮血肿;枕骨骨折;创伤性硬膜外血肿;创伤性脑梗塞;面神经麻痹;支气管炎	好转	汤行录	涂丰霞	陈珊
29	A03康复	2021-08-23	2021-09-08	3139130	王嘉馨	女	8M	生长发育迟缓	房间隔缺损;缺铁性贫血;肝功能异常;枕骨骨折	好转	汤行录	刘婵	项炳武
30	A03康复	2021-08-31	2021-09-15	3141187	陈俊翰	男	2Y	偏瘫	多发性损伤;脑挫伤;颅骨骨折;创伤性颅内出血;创伤性硬膜外血肿;眶骨骨折;急性支气管炎	好转	汤行录	刘婵	赵凯怡
31	A03康复	2021-09-12	2021-09-27	3145301	郑诗涵	女	3Y	脑挫伤	运动障碍;周围性面神经麻痹;脑积水;多发性颅骨骨折;眶骨骨折	好转	汤行录	刘婵	赵凯怡
32	A03康复	2021-10-09	2021-10-17	3151543	王磊	男	7Y	脑挫伤	急性上呼吸道感染;眼睑发育不全;多发性损伤;昏迷;手术后随诊检查;锁骨骨折;颅骨骨折;眼睑闭合不全;角膜变性;癫痫	好转	汤行录	涂丰霞	赵凯怡
33	A03康复	2021-10-01	2021-11-20	3163411	薛东朝	男	8Y	脑挫伤	多发性损伤;创伤性蛛网膜下腔出血;脑室出血;头皮血肿;颅内损伤伴长时间昏迷;肺挫伤;多处挫伤;口角炎;股骨骨折	好转	涂丰霞	涂丰霞	陈珊	股骨骨折切开复位钢针内固定术
34	A03康复	2021-11-09	2021-11-24	3164943	陈桂鸿	男	10Y	偏瘫	多发性损伤;贝尔面瘫;特指手术后状态;颅骨骨折;肾结石;急性上呼吸道感染	好转	汤行录	涂丰霞	赵凯怡
35	A03康复	2021-11-17	2021-12-05	3168751	陈俊翰	男	2Y	偏瘫	多发性损伤;脑挫伤;支气管炎;颅骨骨折;眶骨骨折;硬脑膜下积液	好转	汤行录	涂丰霞	赵凯怡
36	A04(儿童icu)	2020-12-27	2021-01-05	3055725	徐文博	男	6Y	肺挫伤	气胸;胸椎骨折;肾上腺肿物;腰椎骨折;肾挫伤;皮肤挫伤;肝损伤	好转	严纯雪	金江兵	郭书真
37	A04(儿童icu)	2021-01-05	2021-01-09	3056983	徐文博	男	6Y	开放性多发性损伤	肾挫伤;肝损伤;皮肤挫伤;腰椎骨折;胸椎骨折;气胸	好转	严纯雪	金江兵	卢露
38	A04(儿童icu)	2021-01-19	2021-01-21	3061414	郑婉臻	女	7Y	多发性损伤	创伤性胰腺破裂;肝损伤;颅内损伤;下颌骨骨折;肺挫伤;颅骨骨折;急性失血性贫血	未愈	严纯雪	娄鹏程	卢露
39	A04(儿童icu)	2021-02-09	2021-02-09	3066789	沈诗漩	女	1Y	脑挫伤	蛛网膜下腔出血;脑疝;休克;颅骨骨折;肺挫伤;头皮血肿;肝损伤;颅腔积气	未愈	南向珍	梁亚峰	唐震海
40	A04(儿童icu)	2021-03-13	2021-03-16	3078640	李欣语	男	2Y	颅内损伤	硬膜下血肿;蛛网膜下腔出血;颅骨骨折;眶骨骨折;头皮血肿;脑疝;肺挫伤;休克	未愈	南向珍	梁亚峰	唐震海	颅内血肿硬通道穿刺引流术
41	A04(儿童icu)	2021-04-10	2021-04-22	3090917	Я无名1401	女	1Y	脑挫伤	脑疝;蛛网膜下腔出血;尿崩症;颅骨骨折;多处挫伤;肺挫伤;休克;肺炎;弥漫性轴索损伤	未愈	严纯雪	金江兵	卢露
42	A04(儿童icu)	2021-05-31	2021-06-01	3104321	陈锐锐	男	1Y	脑疝	创伤性硬膜下出血;枕骨骨折;急性硬膜下出血;创伤性蛛网膜下腔出血	未愈	严纯雪	金江兵	金江兵	颅骨切除减压术;硬脑膜外血肿清除术
43	A04(儿童icu)	2021-05-20	2021-06-08	3106718	陆嘉慧	女	2Y	多发性损伤	药物和药剂引起全身性皮疹;骨质破坏;颅骨骨折;头皮开放性伤口;肝损伤;肺挫伤;脑挫伤;多处挫伤	好转	严纯雪	娄鹏程	林蓓蓓2	皮肤和皮下组织血肿抽吸术
44	A04(儿童icu)	2021-07-17	2021-07-18	3120542	夏琬舒	女	3Y	创伤性脑疝	颅内损伤;颅骨骨折;颅内出血;头皮血肿;急性失血性贫血	未愈	南向珍	梁亚峰	薛超超
45	A04(儿童icu)	2021-08-13	2021-08-16	3131048	周馨瑶	女	7Y	脑挫伤	颅内损伤;颅内出血;颅骨骨折;脑疝;失血性休克;中枢性呼吸衰竭	未愈	南向珍	梁亚峰	薛超超
46	A04(儿童icu)	2021-10-07	2021-10-07	3148603	周星宇	男	12Y	脑挫伤	缺氧缺血性脑病;呼吸心跳骤停;颅内损伤;肺挫伤;肝损伤;创伤性脾破裂;肾挫伤;失血性休克;蛛网膜下腔出血;腹膜出血;肾上腺损伤;十二指肠损伤;腹水;股骨骨折	未愈	南向珍	梁亚峰	唐震海
47	A04(儿童icu)	2021-10-14	2021-10-17	3151584	邱梦琳	女	12Y	足挤压伤	跟骨骨折;锁骨骨折;骨盆骨折;头皮血肿;肺挫伤;脑挫伤;多处挫伤	好转	南向珍	梁亚峰	薛超超	皮肤和皮下组织血肿抽吸术;皮肤和皮下坏死组织切除清创术
48	A04(儿童icu)	2021-10-10	2021-10-24	3154277	钟璟硕	男	11M	硬膜外血肿	颅骨骨折;头皮血肿;中度贫血;气管软化症;脑挫伤;脑疝	好转	南向珍	梁亚峰	唐震海	颅内血肿硬通道穿刺引流术
49	A04(儿童icu)	2021-11-24	2021-11-24	3165367	赵梓蓄	男	2Y	脑疝	创伤性休克;肺挫伤;创伤性硬膜外出血;脑挫伤;蛛网膜下腔出血;脑干挫伤;呼吸心跳骤停;创伤性硬膜下出血;颅骨骨折;眶骨骨折	死亡	南向珍	梁亚峰	薛超超
50	A04(儿童icu)	2021-11-29	2021-11-30	3167025	金诗淇	女	4M	脑挫伤	肋骨骨折;肝损伤;肺挫伤;颅骨骨折;创伤性蛛网膜下腔出血;硬膜下血肿;头皮血肿	未愈	南向珍	梁亚峰	薛超超
51	A04(儿童icu)	2021-12-14	2021-12-23	3175062	陈景雅	女	12Y	脑挫伤	耻骨骨折;尺骨骨折;腓骨骨折;念珠菌性口炎;肾衰竭;蛛网膜下腔出血;头皮血肿;创伤性胸腔积液;骨盆骨折;非感染性全身炎症反应综合征伴器官衰竭;心脏停搏复苏成功;重度贫血;脑室出血	死亡	南向珍	梁亚峰	唐震海
52	A05儿科内分泌	2021-05-18	2021-05-25	3101876	郑昕悦	女	1Y	急性化脓性扁桃体炎	胫骨骨折;肝功能异常	治愈	单小鸥	金佳蕙	曹顺顺
53	A05儿科内分泌	2021-08-30	2021-09-14	3140887	林轩	男	12Y	低钾血症	胫腓骨干骨折;脂肪肝;尿崩症;特指肿瘤个人史;脑性瘫痪	好转	单小鸥	单小鸥	苏海燕
54	A06(儿神)	2021-05-07	2021-05-16	3098703	李佳诺	女	5Y	急性上呼吸道感染	发热性惊厥;小腿软组织疾患;胫腓骨下端骨折	治愈	叶秀云	施旭来	王博浩	腰椎穿刺
55	A06(儿神)	2021-05-16	2021-05-27	3102581	林传炀	男	14Y	癫痫大发作不伴小发作	可疑疾病观察;甲状旁腺功能减退症;肋骨骨折;胸椎骨折;重度营养不良伴消瘦	好转	胡颖	赵钱雷	赵钱雷
56	A06(儿神)	2021-09-25	2021-09-30	3146656	雷梓涵	男	8Y	病毒性脑炎	指骨骨折;呼吸道感染	好转	叶秀云	张崇晓	王博浩
57	A06(儿神)	2021-11-01	2021-12-01	3167507	黄薇逸	女	11Y	细菌性脑膜炎	脑脊液鼻漏;颅底骨折;特指急性胃炎;上消化道出血;药物过敏反应;心肌损害;食管贲门粘膜撕裂综合征;慢性鼻窦炎	治愈	叶秀云	李秀翠	杨康康	腰椎穿刺
58	A09(儿肾)	2021-01-31	2021-02-09	3066393	章钊鉴	男	8Y	肾病综合征	骨折治疗后恢复期;接触性皮炎;药物性肝损害	好转	庄捷秋	叶晓华	叶晓华
59	A09(儿肾)	2021-07-22	2021-07-29	3124448	王欣诺	女	5Y	下肢局部肿胀、肿物和肿块	掌骨骨折	好转	郑雯洁	郑雯洁	林洪洲
60	A09(儿肾)	2021-09-07	2021-09-10	3139602	张皓宇	男	4Y	持续性血尿	肱骨外髁骨折	好转	杨青	陈晓英	陈晓英
61	A10(儿血)	2021-01-29	2021-03-30	3083204	夏潞豪	男	7Y	恶性肿瘤的维持性化疗	髋关节滑膜炎;急性上呼吸道感染;药物性肝炎;锁骨骨折;皮肤和皮下组织局部感染	好转	周海霞	周海霞	陈敏3	腰椎穿刺;骨髓穿刺术（骨穿）
62	B04儿科呼吸	2021-05-26	2021-06-18	3109722	郑昕悦	女	1Y	支气管肺炎	骨折治疗后恢复期;EB病毒感染;肝功能异常	治愈	胡晓光	温顺航	温顺航	纤维支气管镜检查
63	B04儿科呼吸	2021-09-06	2021-09-09	L0147591	钟熙玥	女	2Y	支气管肺炎	距骨骨折	治愈	林剑	温顺航	张雪雅
64	B06(儿传)	2021-11-28	2021-12-04	3168407	陈绵涛	男	6Y	水痘	脑挫伤;创伤性蛛网膜下腔出血;肱骨上端骨折;头皮挫伤;多发性颅骨骨折	治愈	李素华	李素华	温正旺
65	C03眼科口腔	2020-12-27	2021-01-03	3054722	叶宣林	男	40Y	锁骨骨折		治愈	陈龙	陈龙	陈龙	锁骨骨折切开复位内固定术（包括肩胛骨骨折
66	C03眼科口腔	2020-12-13	2021-01-04	3055264	王爵雄	男	53Y	下颌骨骨折	多发性肋骨骨折;硬膜下血肿;牙龈裂伤	治愈	肖进	肖进	黄武	下颌骨骨折切开复位内固定术
67	C03眼科口腔	2020-12-28	2021-01-06	3055803	毛方灶	男	53Y	颧骨骨折	眶骨骨折;下颌骨骨折;上颌骨骨折	治愈	肖进	肖进	黄武	髂骨骨折切开复位钢针内固定术;髋骨骨折切开复位钢针内固定术
68	C03眼科口腔	2021-01-03	2021-01-06	3055876	张鹏	男	41Y	眶骨骨折	眼挫伤;双眼白内障;前房积血;高血压病	好转	郑海华	董志章	林达
69	C03眼科口腔	2021-01-05	2021-01-09	3056561	杜军花	女	43Y	骨折治疗后随诊检查		其他	杨雷	杨雷	方文来
70	C03眼科口腔	2021-01-03	2021-01-09	3056759	王清福	男	42Y	取除骨折内固定装置		其他	肖进	肖进	黄武	面骨内固定物取出术
71	C03眼科口腔	2020-12-14	2021-01-09	3056762	洪瑞银	男	54Y	颧骨骨折	面部软组织挫伤;混合型颈椎病;颈椎间盘突出;头部外伤;脑震荡;上颌骨骨折;肺部感染;胸部挫伤	治愈	肖进	肖进	黄武	颧骨骨折切开复位内固定术
72	C03眼科口腔	2020-12-30	2021-01-10	3057007	韦汉林	男	29Y	取除骨折内固定装置		其他	郑海华	韩晓辉	林达	面骨内固定物取出术
73	C03眼科口腔	2021-01-04	2021-01-11	3057441	杨连文	男	52Y	取除骨折内固定装置		其他	肖进	肖进	黄武	下颌骨内固定物取出术
74	C03眼科口腔	2021-01-11	2021-01-13	3058492	高瑞瑞	女	31Y	取除骨折内固定装置		其他	肖进	肖进	黄武	下颌骨内固定物取出术
75	C03眼科口腔	2021-01-11	2021-01-16	3059129	谷智博	男	6Y	取除骨折内固定装置	下颌骨骨折	其他	肖进	肖进	黄武	下颌骨内固定物取出术
76	C03眼科口腔	2021-01-05	2021-01-16	3059223	林玉春	男	68Y	下颌骨骨折		治愈	肖进	肖进	黄武	下颌骨骨折切开复位内固定术
77	C03眼科口腔	2021-01-10	2021-01-16	3059377	孙明兰	女	51Y	眶骨骨折	肋骨骨折;颧骨骨折;上颌骨骨折	治愈	郑海华	韩晓辉	林达	眶骨骨折切开复位术;颧骨骨折切开复位内固定术;上颌骨骨折切开复位固定术
78	C03眼科口腔	2021-01-10	2021-01-16	3059439	王诗琪	女	7Y	取除骨折内固定装置	股骨骨折	其他	余可和	余可和	应晓洲	股骨内固定物取出术
79	C03眼科口腔	2021-01-10	2021-01-17	3059731	蒋春风	女	41Y	取除骨折内固定装置	跟骨骨折	其他	孔建中	孔建中	陈墨川	跟骨内固定物取出术
80	C03眼科口腔	2021-01-11	2021-01-18	3060183	胡将国	男	57Y	手舟状骨骨折	腕关节扭伤;多发性肋骨骨折;腰椎骨折	好转	余可和	余可和	应晓洲
81	C03眼科口腔	2021-01-17	2021-01-18	3060191	王子云	女	45Y	开放性胫骨骨折	腓骨骨折;多处挫伤	未愈	翁益民	翁益民	柯陈荣
82	C03眼科口腔	2021-01-13	2021-01-19	3060589	金海东	男	28Y	取除骨折内固定装置	下颌骨骨折	其他	肖进	肖进	黄武	下颌骨内固定物取出术
83	C03眼科口腔	2021-01-11	2021-01-20	3060761	李若彤	女	13Y	上颌骨骨折	下颌骨骨折	好转	肖进	肖进	黄武	上颌骨骨折切开复位固定术;下颌骨骨折切开复位内固定术
84	C03眼科口腔	2021-01-13	2021-01-21	3061307	林晓东	男	41Y	上颌骨骨折	眶骨骨折;颧骨骨折	治愈	肖进	肖进	黄武	上颌骨骨折切开复位固定术;颧骨骨折切开复位术;眶骨骨折切开复位术
85	C03眼科口腔	2021-01-20	2021-01-22	3061624	汤利泽	男	78Y	眼睑裂伤	泪小管断裂;先天性泪小点闭锁;双眼白内障;上颌骨骨折;眶骨骨折;颧骨骨折;肋骨骨折	治愈	郑海华	杨顺海	林达
86	C03眼科口腔	2020-12-24	2021-01-23	3061872	谢吴花	女	56Y	颅底骨折	脑脊液耳漏	好转	肖进	肖进	黄武	髁突骨折切开复位内固定术
87	C03眼科口腔	2021-01-15	2021-01-25	3063067	蔡春英	女	58Y	闭合性胫骨平台骨折	胆囊胆固醇沉着症;高血压病;后天性肾囊肿;脂肪肝;2型糖尿病;腕骨骨折;肾结石	治愈	孔建中	翁益民	柯陈荣	胫骨骨折切开复位钢板内固定术
88	C03眼科口腔	2021-01-18	2021-01-26	3063723	韩扬堂	男	69Y	眶骨骨折	双眼白内障;视神经损伤;颧骨骨折;上颌骨骨折	治愈	郑海华	韩晓辉	林达	眶骨骨折切开复位术;上颌骨骨折切开复位固定术;颧骨骨折切开复位内固定术
89	C03眼科口腔	2021-01-28	2021-02-07	3066029	郑良秀	男	61Y	眼球破裂	泪小管断裂;眼和附器烧伤;单眼白内障;眼睑裂伤;眶骨骨折	好转	郑海华	董志章	林达	眼球破裂修补术
90	C03眼科口腔	2021-02-13	2021-02-15	3068607	贾万里	男	17Y	睑内翻和倒睫	取除骨折内固定装置;视神经损伤	治愈	郑海华	韩晓辉	林达	眼睑内翻矫正术
91	C03眼科口腔	2021-02-10	2021-02-16	3069141	刘珍冈	男	38Y	取除骨折内固定装置	上颌骨骨折	其他	徐兴侨	肖进	黄武	面骨内固定物取出术
92	C03眼科口腔	2021-02-15	2021-02-20	3070071	刘论悻	男	44Y	泪小管断裂	眼睑裂伤;眶骨骨折	治愈	郑海华	韩晓辉	林达	泪小管吻合术
93	C03眼科口腔	2021-02-09	2021-02-20	3070266	张文太	男	62Y	眼球破裂	开放性多发性损伤;面部裂伤;眶骨骨折	治愈	郑穗联	查屹	陈婕灵	眼球破裂修补术;前入路玻璃体切除术
94	C03眼科口腔	2021-02-10	2021-02-23	3071282	林伟	男	22Y	下颌骨骨折	股骨下端骨折;牙槽骨骨折;创伤性牙齿脱落	治愈		肖进		下颌骨骨折切开复位内固定术;股骨骨折切开复位钢针内固定术
95	C03眼科口腔	2021-02-17	2021-02-23	3071535	陈显腾	男	46Y	取除骨折内固定装置	上颌骨骨折	其他	徐兴侨	肖进	黄武	面骨内固定物取出术
96	C03眼科口腔	2021-02-20	2021-02-24	3071826	吕宗超	男	27Y	眶骨骨折		治愈	韩晓辉	杨顺海	林达	髋骨骨折切开复位钢针内固定术
97	C03眼科口腔	2021-02-12	2021-03-03	3074175	万家旗	男	41Y	额骨骨折	眶骨骨折;鼻骨骨折;下颌骨骨折;颞骨骨折;颅腔积气;头皮血肿;肌腱和肌肉损伤	治愈	韩晓辉	董志章	林达	鼻骨骨折切开复位术;眶骨骨折切开复位术;额骨重建术;下颌骨骨折切开复位内固定术
98	C03眼科口腔	2021-02-22	2021-03-03	3074406	曾小维	女	21Y	上颌骨骨折	面部损伤;鼻骨骨折;意外事故、拔除或局部牙周病引起的牙缺失;下颌骨骨折	治愈	徐兴侨	肖进	胡孙强	下颌骨骨折切开复位内固定术;上颌骨骨折切开复位固定术
99	C03眼科口腔	2021-02-22	2021-03-03	3074414	邓福义	男	32Y	取除骨折内固定装置	眼球萎缩;眼球穿通伤	其他	郑海华	韩晓辉	林达	面骨内固定物取出术
100	C03眼科口腔	2021-02-25	2021-03-07	3075321	潘成恩	男	52Y	锁骨骨折	肋骨骨折	治愈	余可和	余可和	卢晓郎	锁骨骨折切开复位钢板内固定术
101	C03眼科口腔	2021-03-01	2021-03-07	3075342	梁永华	男	50Y	眶骨骨折		治愈	郑海华	韩晓辉	林达	眶骨骨折切开复位术
102	C03眼科口腔	2021-02-26	2021-03-07	3075614	王政杰	男	41Y	取除骨折内固定装置	眶骨骨折	其他	郑海华	韩晓辉	林达	面骨内固定物取出术
103	C03眼科口腔	2021-02-27	2021-03-13	3077111	任永提	男	11Y	下颌骨骨折		治愈	徐兴侨	肖进	胡孙强	下颌骨骨折切开复位内固定术
104	C03眼科口腔	2021-02-28	2021-03-13	3077126	刘俊杰	男	19Y	上颌骨骨折		治愈	徐兴侨	肖进	胡孙强	上颌骨骨折切开复位固定术
105	C03眼科口腔	2021-03-03	2021-03-13	3077127	廖情缘	男	17Y	取除骨折内固定装置	上颌骨骨折;下颌骨骨折;特指手术后状态	其他	徐兴侨	肖进	胡孙强	下颌骨内固定物取出术
106	C03眼科口腔	2021-03-03	2021-03-14	3077610	胡金妹	女	53Y	原发性闭角型青光眼	双眼白内障;髌骨骨折	治愈	郑海华	冯旺强	林达	青光眼阀置入术
107	C03眼科口腔	2021-03-10	2021-03-16	3078625	王子航	男	4Y	取除骨折内固定装置	下颌骨骨折;特指手术后状态	其他	徐兴侨	徐兴侨	胡孙强	下颌骨内固定物取出术
108	C03眼科口腔	2021-03-17	2021-03-17	3078943	庄爱娥	女	79Y	股骨粗隆间骨折	高血压病	治愈	黄义星	黄义星	张儒
109	C03眼科口腔	2021-03-18	2021-03-20	3079469	潘铭铭	女	22Y	下颌骨骨折		好转	徐兴侨	徐兴侨	胡孙强
110	C03眼科口腔	2021-03-06	2021-03-20	3079691	黄茜茜	女	13Y	下颌骨骨折		治愈	徐兴侨	肖进	胡孙强	髁突骨折切开复位内固定术
111	C03眼科口腔	2021-03-07	2021-03-20	3079919	郑庆兰	男	66Y	股骨粗隆间骨折	颈椎骨折;第一颈椎骨折;颧骨骨折;牙槽骨骨折;眶骨骨折;眼睑裂伤;开放性面部损伤;鼻骨骨折;眼挫伤;颈部脊髓损伤	治愈	徐兴侨	徐兴侨	胡孙强	股骨骨折闭合复位螺钉内固定术
112	C03眼科口腔	2021-03-20	2021-03-24	3081031	刘论悻	男	44Y	眶骨骨折	特指手术后状态	好转	韩晓辉	杨顺海	林达	眶骨骨折切开复位术
113	C03眼科口腔	2021-03-28	2021-03-29	3082938	吴丽慧	女	22Y	取除骨折内固定装置		其他	陈龙	陈龙	应晓洲	踝关节内固定物取出术
114	C03眼科口腔	2021-03-28	2021-04-04	3084711	余明锋	男	17Y	颧骨骨折	上颌骨骨折	治愈	徐兴侨	肖进	胡孙强	颧骨骨折切开复位内固定术;上颌骨骨折切开复位固定术
115	C03眼科口腔	2021-03-28	2021-04-06	3085336	叶明海	男	37Y	眼球破裂	眶骨骨折;眉部损伤	治愈	查屹	查屹	陈婕灵	眼球摘除伴义眼台置入术;眼睑裂伤缝合术
116	C03眼科口腔	2021-03-30	2021-04-07	3085627	吴进成	男	4Y	眼球破裂	眶骨骨折;额骨骨折;颅腔积气	好转	冯旺强	杨顺海	林达	结膜缝合术;眼球破裂修补术
117	C03眼科口腔	2021-04-05	2021-04-10	3086326	吴火明	男	26Y	取除骨折内固定装置		其他	韩晓辉	杨顺海	林达	面骨内固定物取出术
118	C03眼科口腔	2021-03-25	2021-04-10	3086548	施松莲	女	70Y	原发性闭角型青光眼	肺炎;原发性闭角型青光眼;双眼白内障;陈旧性尺骨骨折;头皮血肿;肾结石	好转	郑穗联	夏哲人	陈婕灵	滤帘切除术[小梁切除术];韧带修补术;尺桡关节脱位切开复位术;尺骨病损切除术;虹膜部分切除术
119	C03眼科口腔	2021-03-31	2021-04-12	3087271	石兴磊	男	17Y	眶骨骨折		好转	韩晓辉	杨顺海	林达	眶骨骨折闭合复位术
120	C03眼科口腔	2021-03-19	2021-04-13	3087475	成良广	男	51Y	眶骨骨折	眼睑裂伤;面部挫伤;颅腔积气;桡骨下端骨折;特指腕骨骨折;颧骨骨折;额骨骨折;上颌骨骨折	好转	韩晓辉	杨顺海	林达	颧骨骨折闭合复位术;上颌骨骨折闭合复位术;眶骨骨折闭合复位术
121	C03眼科口腔	2021-04-12	2021-04-13	3087797	潘胡胜	男	25Y	掌骨骨折		未愈	孔建中	孔建中	陈墨川
122	C03眼科口腔	2021-04-13	2021-04-14	3088241	贾锡虎	男	62Y	鹰嘴骨折		未愈	孔建中	孔建中	陈墨川
123	C03眼科口腔	2021-04-14	2021-04-15	3088511	林明京	男	28Y	特指趾骨骨折	开放性足损伤	好转	黄义星	张儒	张儒
124	C03眼科口腔	2021-04-12	2021-04-17	3088889	夏兰娟	女	52Y	取除骨折内固定装置		其他	黄俊武	王鉴顺	王鉴顺	桡骨内固定物取出术
125	C03眼科口腔	2021-04-12	2021-04-17	3089056	罗时芹	男	44Y	取除骨折内固定装置	脂肪肝;后天性肾囊肿;肾结石	其他	翁益民	翁益民	柯陈荣	跖骨内固定物取出术
126	C03眼科口腔	2021-04-13	2021-04-17	3089100	王文可	男	7Y	肱骨髁上骨折		治愈	张敬东	李玉安	闫广奎	肱骨骨折闭合复位钢针内固定术
127	C03眼科口腔	2021-04-04	2021-04-19	3089549	李龙克	男	11Y	创伤性蛛网膜下腔出血	眶骨骨折;额骨骨折;脑挫伤;头部外伤;面部烧伤;上颌骨骨折;颅腔积气	治愈	韩晓辉	杨顺海	林达	眶骨骨折闭合复位术
128	C03眼科口腔	2021-04-11	2021-04-19	3089580	江银燕	女	18Y	眶骨骨折	屈光不正;眼睑裂伤	治愈	韩晓辉	杨顺海	林达	眶骨骨折闭合复位术
129	C03眼科口腔	2021-04-17	2021-04-19	3089896	黄秀启	男	65Y	泪小管断裂	眶骨骨折;皮肤裂伤;眼睑裂伤	治愈	夏哲人	夏哲人	陈婕灵	眼睑缝合术;泪小管吻合术;泪小管探通术
130	C03眼科口腔	2021-04-16	2021-04-21	3090399	王士宇	男	52Y	取除骨折内固定装置		其他	韩晓辉	杨顺海	林达	面骨内固定物取出术
131	C03眼科口腔	2021-04-08	2021-04-24	3091543	黄水兰	女	75Y	眼睑裂伤	眶骨骨折;视神经损伤;肋骨骨折;单眼白内障;锁骨骨折	治愈	郑穗联	夏哲人	陈婕灵	结膜缝合术;眼睑裂伤缝合术
132	C03眼科口腔	2021-04-01	2021-04-24	3091557	刘坤	男	38Y	眼球破裂	眶骨骨折;眼睑裂伤;结膜裂伤;眼内出血;面部裂伤	治愈	郑穗联	查屹	陈婕灵	皮肤和皮下组织非切除性清创;眼球破裂修补术;前入路玻璃体切除术;眶骨骨折闭合复位术;皮瓣修整术;结膜缝合术;眼睑裂伤缝合术
133	C03眼科口腔	2021-04-15	2021-04-25	3091809	郑树兴	男	67Y	继发于眼外伤的青光眼	双眼白内障;白细胞特指疾患;眼球挫伤;跖骨骨折	好转	郑穗联	夏哲人	陈婕灵	虹膜部分切除术;滤帘切除术[小梁切除术]
134	C03眼科口腔	2021-04-16	2021-04-26	3092020	张林光	男	30Y	下颌骨骨折		治愈	徐兴侨	肖进	胡孙强	下颌骨骨折切开复位内固定术;髁突骨折切开复位内固定术
135	C03眼科口腔	2021-04-14	2021-04-27	3092413	周娟娟	女	22Y	下颌骨骨折		治愈	徐兴侨	肖进	胡孙强	下颌骨骨折切开复位内固定术
136	C03眼科口腔	2021-04-21	2021-04-28	3092815	杨碎枢	男	56Y	取除骨折内固定装置	视神经损伤;双眼白内障	其他	韩晓辉	杨顺海	林达	面骨内固定物取出术
137	C03眼科口腔	2021-04-24	2021-04-29	3093360	项志媚	女	51Y	取除骨折内固定装置	具有眼内晶状体;高度近视;特指手术后状态	其他	郑穗联	夏哲人	陈婕灵	玻璃体腔硅油取出术
138	C03眼科口腔	2021-04-24	2021-05-02	3094093	柳琪琪	女	10Y	下颌骨骨折		治愈	徐兴侨	肖进	胡孙强	下颌骨骨折切开复位内固定术
139	C03眼科口腔	2021-04-28	2021-05-05	3095391	刘美茶	女	41Y	眶骨骨折		治愈	韩晓辉	杨顺海	林达	眶骨骨折闭合复位术
140	C03眼科口腔	2021-05-03	2021-05-08	3096160	邢城杰	男	3Y	急性泪囊炎	急性鼻窦炎;多发性面骨骨折	治愈	韩晓辉	杨顺海	林达	泪囊-鼻腔吻合术[DCR手术]
141	C03眼科口腔	2021-05-03	2021-05-08	3096194	杨华树	女	34Y	取除骨折内固定装置	胆囊息肉;糖尿病	其他	赵友明	赵友明	周玉龙	股骨内固定物取出术
142	C03眼科口腔	2021-04-22	2021-05-08	3096224	邓超	男	22Y	眶骨骨折	眼睑裂伤;多发性面骨骨折	治愈	韩晓辉	杨顺海	林达	泪囊-鼻腔吻合术[DCR手术];鼻泪管插管术;眶骨骨折切开复位术;眼睑裂伤缝合术;内眦成形术
143	C03眼科口腔	2021-05-03	2021-05-08	3096227	郑涵	女	21Y	肩锁关节脱位	肩胛骨骨折	治愈	赵友明	赵友明	周玉龙	肩锁关节脱位切开复位内固定术
144	C03眼科口腔	2021-05-12	2021-05-15	3098554	滕益林	男	36Y	开放性指骨骨折	开放性手指损伤伴指甲损害;拇指神经损伤	治愈	虞庆	虞庆	虞庆	中厚皮片移植术;指骨植骨术;指间关节融合术
145	C03眼科口腔	2021-05-01	2021-05-16	3098718	林阿明	男	34Y	眼球破裂	盲，单眼;眶骨骨折;前房积血	治愈	蔡剑秋	夏哲人	陈婕灵	后入路玻璃体切割术;眼球破裂修补术;结膜缝合术;前房成形术;前房冲洗术
146	C03眼科口腔	2021-05-06	2021-05-19	3099846	何建鸟	男	31Y	眶骨骨折	后天性肾囊肿	治愈	韩晓辉	杨顺海	林达	眶骨骨折闭合复位术
147	C03眼科口腔	2021-05-15	2021-05-19	3100000	胡敖杰	男	11Y	牙槽骨骨折	创伤性牙齿脱落	治愈	徐兴侨	肖进	黄武	牙槽骨折切开复位伴牙齿固定术
148	C03眼科口腔	2021-05-13	2021-05-23	3101358	蔡庆王	男	42Y	眶骨骨折	角膜葡萄膜炎;继发于眼部疾患青光眼;角膜云翳;晶状体脱位;2型糖尿病;高血压病	治愈	韩晓辉	杨顺海	林达	眶骨骨折切开复位术
149	C03眼科口腔	2021-05-23	2021-05-25	3102035	李秋琴	女	53Y	闭合性胫骨平台骨折	2型糖尿病	好转	余可和	余可和	卢晓郎
150	C03眼科口腔	2021-05-23	2021-05-26	3102494	高超	男	53Y	闭合性胫骨平台骨折	下肢静脉血栓形成;膝关节十字韧带扭伤;肾结石;膝外侧半月板损伤;膝关节副韧带扭伤	好转	余可和	余可和	卢晓郎
151	C03眼科口腔	2021-05-25	2021-05-27	3102820	黄国华	男	61Y	股骨骨折	骨折治疗后恢复期;高血压病	好转	潘骏	冯永增	金海东
152	C03眼科口腔	2021-05-22	2021-05-29	3103536	黄建忠	男	55Y	眶骨骨折	眼球挫伤;单眼白内障	治愈	冯旺强	韩晓辉	林达
153	C03眼科口腔	2021-05-29	2021-05-30	3103643	谢滋滋	女	7Y	下颌骨骨折		未愈	徐兴侨	肖进	黄武
154	C03眼科口腔	2021-05-06	2021-05-31	3104056	潘碎罗	男	38Y	眶骨骨折	颧骨骨折;肺挫伤;上颌骨骨折;手舟状骨骨折;桡骨下端骨折;颅骨骨折;面部挫伤;胸部损伤;陈旧性腰椎骨折;脂肪肝	治愈	韩晓辉	杨顺海	林达	桡骨骨折切开复位钢板内固定术;眶骨骨折闭合复位术
155	C03眼科口腔	2021-05-11	2021-06-01	3104122	吴小菊	女	48Y	眶骨骨折	头皮血肿;尺骨桡骨远端骨折;胸腔积液;颅底骨折;眼睑血肿	治愈	冯旺强	韩晓辉	林达	眶骨骨折闭合复位术;桡骨骨折切开复位钢板内固定术;尺骨骨折切开复位钢针内固定术
156	C03眼科口腔	2021-05-24	2021-06-02	3104670	蔡阁明	男	49Y	锁骨骨折	前列腺结石;肝钙化灶;脂肪肝;小腿挫伤;肩胛骨骨折;下肢软组织感染;下肢动脉粥样硬化	治愈	余可和	余可和	卢晓郎	锁骨骨折切开复位钢板内固定术
157	C03眼科口腔	2021-05-24	2021-06-04	3105102	李方奏	男	39Y	跟骨骨折	前列腺结石;脂肪肝	治愈	余可和	余可和	卢晓郎	跟骨骨折切开复位钢板内固定术
158	C03眼科口腔	2021-05-24	2021-06-05	3105269	杜新新	男	24Y	取除骨折内固定装置		其他	徐兴侨	肖进	汪池	面骨内固定物取出术
159	C03眼科口腔	2021-05-29	2021-06-05	3105597	黄德生	男	53Y	眼球破裂	无晶状体;眼内出血;浆液性视网膜脱离;角膜斑翳;眶骨骨折	治愈	冯旺强	韩晓辉	林达	结膜缝合术;眼球破裂修补术;前房成形术
160	C03眼科口腔	2021-05-14	2021-06-09	3107067	李周干	男	50Y	下颌骨骨折	股骨干骨折	治愈	徐兴侨	肖进	汪池	下颌骨死骨切除术;下颌骨骨折切开复位内固定术;皮肤和皮下组织非切除性清创;股骨骨折闭合复位髓内针内固定术
161	C03眼科口腔	2021-06-05	2021-06-10	3107291	包玉英	女	64Y	取除骨折内固定装置	2型糖尿病;完全性右束支传导阻滞;胆囊结石;脂肪肝	其他	王振文	水小龙	水小龙	髌骨内固定物取出术
162	C03眼科口腔	2021-06-07	2021-06-12	3107851	潘玉兰	女	69Y	取除骨折内固定装置	高血压病;2型糖尿病;胃溃疡;胆囊管结石	其他	赵友明	赵友明	郭伟军	踝关节内固定物取出术
163	C03眼科口腔	2021-05-20	2021-06-16	3109152	陈开文	男	40Y	下颌骨骨折		治愈	徐兴侨	肖进	汪池	下颌骨骨折切开复位内固定术
164	C03眼科口腔	2021-04-27	2021-06-20	3110673	陈国杰	男	49Y	眼球破裂	眼睑挫伤;面部裂伤;眶骨骨折;颧骨骨折;盲，单眼	治愈	韩晓辉	杨顺海	林达	眼内容物剜出伴巩膜内填充;颧骨骨折切开复位术;眶骨骨折切开复位术;前房冲洗术;皮肤和皮下组织非切除性清创;眼球破裂修补术
165	C03眼科口腔	2021-06-14	2021-06-21	3110963	郑崇香	女	57Y	取除骨折内固定装置		其他	赵友明	赵友明	郭伟军	肱骨内固定物取出术
166	C03眼科口腔	2021-06-12	2021-06-23	3111755	葛国兵	男	50Y	眼球破裂	眶骨骨折;眼睑裂伤	治愈	郑海华	杨顺海	林达	眼睑裂伤缝合术;眼球内容物剜出术
167	C03眼科口腔	2021-06-16	2021-06-27	3112867	梁祚聪	男	52Y	取除骨折内固定装置		其他	徐兴侨	肖进	汪池	面骨内固定物取出术
168	C03眼科口腔	2021-06-19	2021-06-27	3112977	陈文雷	男	23Y	取除骨折内固定装置		其他	翁益民	翁益民	柯陈荣	股骨内固定物取出术
169	C03眼科口腔	2021-06-12	2021-06-28	3113259	林阿明	男	33Y	眼球萎缩	盲，单眼;眶骨骨折	治愈	韩晓辉	冯旺强	林达	眼内容物剜出伴巩膜内填充
170	C03眼科口腔	2021-06-21	2021-06-29	3113764	林汉斌	男	29Y	泪小管裂伤	眼睑裂伤;眶骨骨折;眼球挫伤;鼻骨骨折	治愈	韩晓辉	杨顺海	林达	眼睑裂伤缝合术;泪小管吻合术
171	C03眼科口腔	2021-06-26	2021-06-30	3114024	王素洪	男	30Y	眶骨骨折		治愈	韩晓辉	冯旺强	林达	眶骨骨折切开复位术
172	C03眼科口腔	2021-06-27	2021-07-01	3114207	任永提	男	9Y	取除骨折内固定装置		其他	徐兴侨	肖进	汪池	下颌骨内固定物取出术
173	C03眼科口腔	2021-06-18	2021-07-03	3115041	瞿海军	男	43Y	闭合性胫骨平台骨折	高血压病	治愈	余可和	余可和	卢晓郎	膝外侧半月板切除术;胫骨骨折切开复位钢板内固定术
174	C03眼科口腔	2021-06-19	2021-07-03	3115062	邹宋娟	女	30Y	颧骨骨折	上颌骨骨折	治愈	徐兴侨	肖进	于跃远	上颌骨骨折切开复位固定术;颧骨骨折切开复位内固定术
175	C03眼科口腔	2021-06-21	2021-07-03	3115108	邢建成	男	59Y	眶骨骨折	鼻骨骨折;筛窦骨折;后天性肾囊肿;骨盆骨折;上颌骨骨折;额骨骨折;双眼白内障;结膜出血	治愈	韩晓辉	杨顺海	林达	眶骨骨折闭合复位术
176	C03眼科口腔	2021-06-25	2021-07-04	3114853	赵宗慧	女	4Y	股骨特指部位骨折		好转	赵友明	赵友明	郭伟军	股骨骨折闭合复位髓内针内固定术
177	C03眼科口腔	2021-06-24	2021-07-06	3116190	高德添	男	79Y	眼球破裂	眼内出血;肩关节脱位;多发性脑梗死;帕金森综合征;颞骨骨折;外耳道炎;中耳炎;乳突炎;颞下颌关节脱位	治愈	冯旺强	杨顺海	林达	前入路玻璃体切除术;玻璃体腔气液交换术;视网膜剥离术;眼球破裂修补术
178	C03眼科口腔	2021-06-30	2021-07-07	3116468	黄俊棋	男	1Y	下颌骨骨折	牙脱位	治愈	徐兴侨	肖进	汪池	下颌骨骨折切开复位内固定术
179	C03眼科口腔	2021-06-29	2021-07-11	3117978	徐代杰	男	39Y	开放性尺骨桡骨骨折	脂肪肝	治愈	陈龙	陈龙	应晓洲	皮肤缝合术;肌肉清创术;尺骨骨折切开复位钢板内固定术;尺骨开放性骨折清创术;桡骨骨折切开复位螺钉内固定术;皮肤和皮下组织血肿抽吸术
180	C03眼科口腔	2021-07-10	2021-07-14	3118888	贾万里	男	17Y	取除骨折内固定装置		其他	韩晓辉	杨顺海	林达	面骨内固定物取出术
181	C03眼科口腔	2021-07-05	2021-07-14	3118903	林允龙	男	46Y	颧骨骨折		治愈	徐兴侨	肖进	汪池	颧骨骨折切开复位术
182	C03眼科口腔	2021-07-07	2021-07-14	3119025	王进孟	男	35Y	取除骨折内固定装置		其他	徐兴侨	肖进	汪池	下颌骨内固定物取出术
183	C03眼科口腔	2021-06-26	2021-07-14	3119149	胡荷红	女	66Y	眶骨骨折	双眼白内障;头部外伤;上颌骨骨折;唇裂伤;面部损伤;肺结节;鼻骨骨折	治愈	韩晓辉	杨顺海	林达	眶骨骨折闭合复位术
184	C03眼科口腔	2021-07-06	2021-07-17	3119905	麻泰沙	男	33Y	开放性胫骨骨折	眶骨骨折;颈椎骨折;颈部挫伤;胸部挫伤;面部软组织挫伤	治愈	韩晓辉	杨顺海	林达	胫骨骨折切开复位钢板内固定术
185	C03眼科口腔	2021-06-26	2021-07-17	3120043	张长玉	男	32Y	眼球破裂	眼内出血;创伤性脉络膜脱离;视神经损伤;眶骨骨折;颧骨骨折;上颌骨骨折;晶状体脱位;颅底骨折;创伤性硬膜外血肿	治愈	冯旺强	杨顺海	林达	后入路玻璃体切割术;眶骨骨折闭合复位术;上颌骨骨折切开复位术;颧骨骨折切开复位术;眶骨骨折切开复位术;前房冲洗术;眼球破裂修补术;玻璃体硅油置入术,用于视网膜再附着;视网膜激光凝固术
186	C03眼科口腔	2021-06-30	2021-07-19	3120736	项小宝	男	35Y	眶骨骨折	头部外伤;鼻骨骨折;额骨骨折;上颌骨骨折;面部裂伤;多发性面骨骨折;头皮血肿;面部挫伤;筛窦骨折	治愈	韩晓辉	杨顺海	林达	眶骨骨折切开复位术
187	C03眼科口腔	2021-07-12	2021-07-24	3122508	王昌华	男	38Y	眶骨骨折		治愈	冯旺强	杨顺海	林达	眶骨骨折闭合复位术
188	C03眼科口腔	2021-07-01	2021-07-24	3122655	林湘程	男	11Y	眶骨骨折	颧骨骨折;创伤性硬膜外血肿;创伤性硬膜下出血;面部软组织挫伤;视神经损伤;颅腔积气	治愈	韩晓辉	杨顺海	林达	颧骨骨折闭合复位术;眶骨骨折闭合复位术
189	C03眼科口腔	2021-07-19	2021-07-26	3123395	宋美玉	女	74Y	继发于眼外伤的青光眼	双眼白内障;掌骨骨折;高血压病;2型糖尿病;脂肪肝;肺部感染;肩胛骨骨折;多发性肋骨骨折	治愈	韩晓辉	杨顺海	林达	虹膜部分切除术;滤帘切除术[小梁切除术]
190	C03眼科口腔	2021-07-21	2021-07-27	3123768	林玉春	男	69Y	取除骨折内固定装置		其他	徐兴侨	肖进	汪池	下颌骨内固定物取出术
191	C03眼科口腔	2021-07-20	2021-07-28	3124239	林煦捷	男	17Y	下颌骨骨折		治愈	徐兴侨	肖进	汪池	下颌骨骨折闭合复位术
192	C03眼科口腔	2021-07-20	2021-07-31	3124787	朱守齐	男	38Y	颧骨骨折	慢性胃炎	治愈	徐兴侨	肖进	汪池	颧骨骨折切开复位内固定术
193	C03眼科口腔	2021-07-24	2021-07-31	3124848	刘果树	男	51Y	眶骨骨折		治愈	冯旺强	杨顺海	林达	眶骨骨折闭合复位术
194	C03眼科口腔	2021-07-28	2021-08-03	3126045	王爵雄	男	55Y	取除骨折内固定装置	高血压病	其他	徐兴侨	肖进	黄武	下颌骨内固定物取出术
195	C03眼科口腔	2021-07-28	2021-08-07	3127232	姜佳辉	男	21Y	取除骨折内固定装置		其他	徐兴侨	肖进	汪池	面骨内固定物取出术
196	C03眼科口腔	2021-07-28	2021-08-08	3127772	张磊	男	24Y	取除骨折内固定装置	黄斑和后极变性	其他	韩晓辉	杨顺海	林达	面骨内固定物取出术
197	C03眼科口腔	2021-07-31	2021-08-08	3127798	彭文华	男	46Y	眶骨骨折		治愈	韩晓辉	杨顺海	林达	眶骨骨折闭合复位术
198	C03眼科口腔	2021-07-26	2021-08-09	3128271	许允根	男	18Y	眶骨骨折		治愈	韩晓辉	杨顺海	林达	眶骨骨折闭合复位术
199	C03眼科口腔	2021-07-27	2021-08-11	3129042	蓝承应	男	45Y	下颌骨骨折		治愈	徐兴侨	肖进	黄武	下颌骨骨折切开复位内固定术
200	C03眼科口腔	2021-08-04	2021-08-11	3129129	李明强	男	28Y	取除骨折内固定装置		其他	徐兴侨	肖进	黄武	面骨内固定物取出术
201	C03眼科口腔	2021-07-19	2021-08-11	3129258	华银花	女	54Y	睑内翻和倒睫	双眼白内障;膝关节炎;特指骨坏死;闭合性胫骨平台骨折;脊柱侧弯;原发性肾上腺皮质功能减退症;甲状腺机能减退症	治愈	韩晓辉	杨顺海	林达	眼睑内翻矫正术;膝关节髌股表面置换术
202	C03眼科口腔	2021-08-03	2021-08-15	3130538	甘开娃	男	54Y	眶骨骨折	上颌骨骨折;颧骨骨折;腰椎间盘突出	治愈	韩晓辉	杨顺海	林达	上颌骨骨折切开复位固定术;眶骨骨折闭合复位术
203	C03眼科口腔	2021-07-25	2021-08-18	3131619	包根亮	男	42Y	眼和附器烧伤	眶骨骨折;肋骨骨折	治愈	韩晓辉	杨顺海	林达
204	C03眼科口腔	2021-08-14	2021-08-18	3131799	林晓东	男	41Y	取除骨折内固定装置		其他	韩晓辉	杨顺海	林达	面骨内固定物取出术
205	C03眼科口腔	2021-08-10	2021-08-19	3132073	唐书彪	男	30Y	下颌骨骨折		治愈	徐兴侨	肖进	黄武	下颌骨骨折切开复位内固定术
206	C03眼科口腔	2021-08-19	2021-08-19	3132138	叶伟俊	男	16Y	视神经损伤	眶骨骨折	未愈	韩晓辉	杨顺海	林达
207	C03眼科口腔	2021-08-05	2021-08-21	3132577	石俊明	男	54Y	创伤性牙齿脱落	牙槽骨骨折;上颌骨骨折;面部软组织挫伤;脑挫伤;面部裂伤	治愈	徐兴侨	肖进	黄武	牙槽植骨成形术;上颌骨骨折切开复位固定术;拔牙术
208	C03眼科口腔	2021-08-04	2021-08-21	3132607	陈建明	男	43Y	眶骨骨折	上颌骨骨折;眼眶挫伤;急性蝶窦炎;急性上颌窦炎	治愈	韩晓辉	杨顺海	林达	眶骨骨折闭合复位术;上颌骨骨折闭合复位术
209	C03眼科口腔	2021-08-07	2021-08-21	3132633	邵曰霸	男	30Y	下颌骨骨折	肩部挫伤;气胸	治愈	徐兴侨	肖进	黄武	下颌骨骨折切开复位内固定术
210	C03眼科口腔	2021-08-04	2021-08-23	3133414	叶坤平	男	24Y	眶骨骨折	上颌骨骨折;颧骨骨折;肺挫伤;锁骨骨折;脂肪肝	治愈	韩晓辉	杨顺海	林达	上颌骨骨折切开复位固定术;颧骨骨折切开复位内固定术;眶骨骨折闭合复位术
211	C03眼科口腔	2021-08-14	2021-08-28	3134927	姜瀛毅	男	57Y	眶骨骨折	前房积血;鼻骨骨折;眼挫伤;双眼白内障;高度近视;玻璃体出血	治愈	韩晓辉	杨顺海	林达	眶骨骨折闭合复位术
212	C03眼科口腔	2021-08-22	2021-09-01	3136475	刘高翔	男	37Y	额骨骨折	眶骨骨折;肾结石;创伤性硬膜外出血;脑挫伤;上颌骨骨折;头皮血肿;多处挫伤	治愈	韩晓辉	杨顺海	林达	眶骨重建术;颅骨骨折复位术;眶骨骨折闭合复位术
213	C03眼科口腔	2021-08-08	2021-09-01	3136494	李三女	女	53Y	颧骨骨折	慢性上颌窦炎;面部软组织挫伤;眶骨骨折;下颌骨骨折;慢性筛窦炎	好转	徐兴侨	肖进	黄武	颧骨骨折切开复位内固定术
214	C03眼科口腔	2021-08-07	2021-09-02	3137029	陈浩	男	27Y	创伤性颅内出血	上颌骨骨折;视神经损伤;角膜裂伤;泪小管裂伤;眶骨骨折;眼球移位;皮肤和皮下组织局部感染;颅腔积气;颅内出血;开放性面部损伤;面部裂伤	治愈	韩晓辉	杨顺海	林达	上颌骨骨折切开复位固定术;眶骨骨折闭合复位术;皮肤和皮下组织非切除性清创;角膜裂伤缝合术
215	C03眼科口腔	2021-08-26	2021-09-06	3138253	叶伟俊	男	16Y	眶骨骨折	视神经损伤	治愈	冯旺强	杨顺海	林达	眶骨骨折闭合复位术
216	C03眼科口腔	2021-08-27	2021-09-06	3138338	韩扬堂	男	68Y	取除骨折内固定装置	双眼白内障	其他	韩晓辉	杨顺海	林达	面骨内固定物取出术
217	C03眼科口腔	2021-09-04	2021-09-08	3138893	葛国兵	男	50Y	睑裂狭小	眼球摘除术后状态;眶骨骨折	治愈	郑海华	杨顺海	林达	外眦成形术
218	C03眼科口腔	2021-08-29	2021-09-11	3139832	徐国龙	男	63Y	继发于眼部疾患青光眼	创伤性前房积血;虹膜离断;胸部挫伤;肋骨骨折;肩胛骨骨折;面部挫伤	好转	韩晓辉	杨顺海	林达
219	C03眼科口腔	2021-09-01	2021-09-11	3140041	李周干	男	50Y	取除骨折内固定装置		其他	徐兴侨	肖进	黄武	下颌骨骨折切开复位内固定术;下颌骨自体骨植入术;下颌骨内固定物取出术
220	C03眼科口腔	2021-08-29	2021-09-11	3140080	徐定方	男	54Y	下颌骨骨折		治愈	徐兴侨	肖进	黄武	下颌骨骨折切开复位内固定术
221	C03眼科口腔	2021-09-11	2021-09-14	3141030	裴怀娥	女	43Y	取除骨折内固定装置		其他	韩晓辉	杨顺海	林达	面骨内固定物取出术
222	C03眼科口腔	2021-09-12	2021-09-15	3141408	陈阿碎	女	89Y	股骨粗隆间骨折	高血压病	好转	潘骏	冯永增	何自力
223	C03眼科口腔	2021-09-03	2021-09-18	3142060	张建波	男	32Y	眼球破裂	创伤性脉络膜脱离;创伤性视网膜脱离;眼睑裂伤;眶骨骨折;玻璃体出血	治愈	郑穗联	夏哲人	郭燕	玻璃体硅油置入术,用于视网膜再附着;视网膜激光凝固术;前入路玻璃体切除术;视网膜脱离复位术;眼睑裂伤缝合术;眼球破裂修补术
224	C03眼科口腔	2021-09-04	2021-09-18	3142094	林贤龙	男	34Y	下颌骨骨折		治愈	徐兴侨	肖进	黄武	下颌骨骨折切开复位内固定术
225	C03眼科口腔	2021-09-14	2021-09-18	3142221	刘似皑	女	40Y	眼挫伤	结膜出血;眶骨骨折	治愈	郑海华	杨顺海	林达
226	C03眼科口腔	2021-09-12	2021-09-18	3142286	林定洋	男	45Y	跟骨骨折	下肢静脉血栓形成;脂肪肝;前列腺结石	治愈	洪建军	周一飞	周一飞	股骨骨折闭合复位螺钉内固定术
227	C03眼科口腔	2021-09-08	2021-09-19	3142688	林圣春	男	50Y	取除骨折内固定装置		其他	徐兴侨	肖进	黄武	面骨内固定物取出术
228	C03眼科口腔	2021-09-07	2021-09-19	3142720	王博宇	男	12Y	下颌骨骨折		治愈	徐兴侨	肖进	黄武	下颌骨骨折切开复位内固定术
229	C03眼科口腔	2021-09-19	2021-09-25	3144689	胡立尧	男	61Y	泪小管裂伤	眼睑裂伤;眶骨骨折	治愈	郑穗联	夏哲人	郭燕	眼睑裂伤缝合术;鼻泪管插管术;泪小管吻合术
230	C03眼科口腔	2021-09-15	2021-09-26	3145171	岑燕雄	男	26Y	颧骨骨折		治愈	徐兴侨	肖进	黄武	颧骨骨折切开复位内固定术
231	C03眼科口腔	2021-09-21	2021-09-29	3146072	文志堂	男	58Y	下颌骨骨折		治愈	徐兴侨	肖进	黄武	下颌骨骨折切开复位内固定术
232	C03眼科口腔	2021-09-22	2021-09-29	3146163	池建强	男	28Y	下颌骨骨折		治愈	徐兴侨	肖进	黄武	下颌骨骨折切开复位内固定术
233	C03眼科口腔	2021-09-24	2021-09-29	3146244	李龙克	男	12Y	取除骨折内固定装置		其他	韩晓辉	杨顺海	林达	面骨内固定物取出术
234	C03眼科口腔	2021-09-23	2021-09-30	3146797	成良广	男	52Y	取除骨折内固定装置		其他	韩晓辉	杨顺海	林达	面骨内固定物取出术
235	C03眼科口腔	2021-09-26	2021-10-02	3147558	周万强	男	28Y	颧骨骨折		治愈	徐兴侨	肖进	黄武	颧骨骨折切开复位内固定术
236	C03眼科口腔	2021-09-26	2021-10-09	3149082	刘文荣	男	45Y	下颌骨骨折		治愈	徐兴侨	肖进	胡孙强	下颌骨骨折切开复位内固定术
237	C03眼科口腔	2021-09-29	2021-10-11	3149613	李劣货	男	47Y	下颌骨骨折	牙槽骨骨折	治愈	徐兴侨	肖进	胡孙强	下颌骨骨折切开复位内固定术;牙槽骨折切开复位内固定术
238	C03眼科口腔	2021-10-08	2021-10-11	3149686	张琨	男	24Y	牙槽骨骨折		好转	徐兴侨	肖进	胡孙强
239	C03眼科口腔	2021-10-09	2021-10-16	3151204	林晨阳	男	4Y	牙槽骨骨折		治愈	徐兴侨	肖进	胡孙强	牙槽骨折切开复位伴牙齿固定术
240	C03眼科口腔	2021-10-07	2021-10-17	3151744	胡克	男	27Y	下颌骨骨折	上颌骨骨折;骶骨骨折;蒙特贾骨折脱位;面部损伤	治愈	徐兴侨	徐兴侨	胡孙强	下颌骨骨折切开复位内固定术
241	C03眼科口腔	2021-10-15	2021-10-19	3152578	潘正安	男	42Y	取除骨折内固定装置		其他	韩晓辉	董志章	林达	面骨内固定物取出术
242	C03眼科口腔	2021-10-09	2021-10-20	3152875	车何琴	男	51Y	下颌骨骨折		治愈	肖进	徐兴侨	胡孙强	下颌骨骨折切开复位内固定术
243	C03眼科口腔	2021-10-19	2021-10-20	3152966	张爱莲	女	69Y	桡骨下端骨折	2型糖尿病;高血压病;下肢动脉粥样硬化;后天性肾囊肿;下肢静脉曲张;脂肪肝	好转	翁益民	翁益民	柯陈荣
244	C03眼科口腔	2021-10-09	2021-10-23	3153887	胡丽平	女	39Y	下颌骨骨折		治愈	肖进	肖进	胡孙强	下颌骨骨折切开复位内固定术
245	C03眼科口腔	2021-10-18	2021-10-27	3155145	林金权	男	47Y	取除骨折内固定装置		其他	韩晓辉	董志章	林达	面骨内固定物取出术
246	C03眼科口腔	2021-10-26	2021-10-27	3155473	曾瑞	男	11Y	特指指骨骨折	癫痫	好转	虞庆	虞庆	林康	指骨骨折闭合复位术
247	C03眼科口腔	2021-10-27	2021-10-31	3156502	王春平	女	53Y	取除骨折内固定装置		其他	杨雷	杨雷	张月雷	髌骨内固定物取出术
248	C03眼科口腔	2021-10-26	2021-11-03	3157808	朱朝阳	男	30Y	眶骨骨折		治愈	郑海华	韩晓辉	林达	眶骨骨折闭合复位术
249	C03眼科口腔	2021-11-03	2021-11-06	3158754	王耀琦	男	5Y	肱骨髁上骨折	前臂神经损伤	好转	张敬东	李玉安	闫广奎	肱骨骨折闭合复位钢针内固定术
250	C03眼科口腔	2021-10-30	2021-11-06	3158831	周娟娟	女	22Y	取除骨折内固定装置		其他	肖进	肖进	徐兴侨	下颌骨内固定物取出术
251	C03眼科口腔	2021-10-22	2021-11-07	3159029	余剑武	男	34Y	颧骨骨折	上颌骨骨折	治愈	肖进	肖进	于跃远	颧骨骨折切开复位内固定术;上颌骨骨折切开复位固定术
252	C03眼科口腔	2021-11-03	2021-11-10	3160267	陈福伦	男	58Y	眶骨骨折	颧骨骨折;双眼白内障	治愈	韩晓辉	董志章	林达	颧骨骨折闭合复位术;眶骨骨折闭合复位术
253	C03眼科口腔	2021-10-31	2021-11-11	3160808	范鳛郦	男	22Y	颧骨骨折	多处挫伤;眶骨骨折;鼻骨骨折;颅底骨折;额骨骨折;筛窦骨折;上颌骨骨折	治愈	徐兴侨	肖进	于跃远	上颌骨骨折切开复位固定术;颧骨骨折切开复位内固定术
254	C03眼科口腔	2021-10-31	2021-11-14	3161546	徐望海	男	15Y	下颌骨骨折		治愈	肖进	肖进	汪池	髁突高位切除术
255	C03眼科口腔	2021-11-11	2021-11-15	3162073	陈光荣	男	53Y	取除骨折内固定装置	前列腺结石	其他	陈华	孙辽军	王特	跖骨内固定物取出术
256	C03眼科口腔	2021-11-11	2021-11-15	3162158	虞理达	男	33Y	视神经损伤	眶骨骨折	好转	冯旺强	董志章	林达
257	C03眼科口腔	2021-11-09	2021-11-17	3162641	付康	男	17Y	眶骨骨折	创伤性硬膜外血肿;头皮血肿;眼眶挫伤;颅腔积气;颞骨骨折	治愈	冯旺强	董志章	林达	眶骨骨折闭合复位术;上颌骨骨折闭合复位术
258	C03眼科口腔	2021-11-15	2021-11-20	3163673	蔡庆王	男	42Y	取除骨折内固定装置	前房积血;继发于眼部疾患青光眼;角膜葡萄膜炎;晶状体脱位;角膜云翳;2型糖尿病;高血压病	其他	韩晓辉	韩晓辉	林达	面骨内固定物取出术
259	C03眼科口腔	2021-11-20	2021-11-24	3165040	吴小菊	女	53Y	取除骨折内固定装置		其他	冯旺强	董志章	林达	面骨内固定物取出术
260	C03眼科口腔	2021-11-09	2021-11-24	3165046	付忠芬	女	49Y	眶骨骨折	上颌骨骨折;颧骨骨折;翼状胬肉	治愈	冯旺强	董志章	林达	上颌骨骨折闭合复位术;颧骨骨折闭合复位术;眶骨骨折闭合复位术
261	C03眼科口腔	2021-11-22	2021-11-29	3166803	吴士启	男	51Y	泪小管断裂	眼睑裂伤;眶骨骨折	治愈	冯旺强	董志章	林达	眼睑裂伤缝合术;泪小管探通术;泪小管吻合术
262	C03眼科口腔	2021-11-07	2021-11-29	3166847	方陈恩	男	68Y	下颌骨骨折	上颌骨骨折;颧骨骨折;椎间盘疾患;胆囊息肉;特指身体结构诊断性影像检查异常所见	治愈	徐兴侨	肖进	汪池	下颌骨骨折切开复位内固定术
263	C03眼科口腔	2021-11-20	2021-11-30	3167130	周尾花	女	71Y	髌骨骨折	高血压病;下肢动脉粥样硬化;肺钙化;肺纤维化	治愈	陈龙	陈龙	应晓洲	髌韧带缝合术;髌骨骨折切开复位张力带钢丝内固定术
264	C03眼科口腔	2021-11-17	2021-11-30	3167217	王友谊	男	24Y	下颌骨骨折		治愈	肖进	肖进	汪池	下颌骨骨折切开复位内固定术
265	C03眼科口腔	2021-11-27	2021-11-30	3167335	王世爱	男	36Y	颧骨骨折		治愈	肖进	肖进	汪池	颧骨骨折切开复位内固定术
266	C03眼科口腔	2021-11-29	2021-12-06	3169397	徐民超	男	15Y	眶骨骨折	上颌骨骨折;屈光不正	治愈	冯旺强	韩晓辉	林达	上颌骨骨折切开复位固定术;眶骨骨折闭合复位术
267	C03眼科口腔	2021-11-24	2021-12-07	3169616	陈开文	男	41Y	取除骨折内固定装置	高血压病	其他	徐兴侨	肖进	汪池	面骨内固定物取出术
268	C03眼科口腔	2021-12-01	2021-12-07	3169627	黄俊棋	男	2Y	取除骨折内固定装置		其他	徐兴侨	肖进	汪池	面骨内固定物取出术
269	C03眼科口腔	2021-12-06	2021-12-11	3170906	张自成	男	52Y	眶骨骨折	眼挫伤	治愈	韩晓辉	董志章	林达	眶骨骨折闭合复位术
270	C03眼科口腔	2021-12-09	2021-12-13	3171674	陈一勇	男	41Y	泪小管裂伤	眼睑和眼周区开放性伤口;眶骨骨折;肺占位性病变	治愈	冯旺强	董志章	林达	眼睑裂伤缝合术;泪小管吻合术
271	C03眼科口腔	2021-12-11	2021-12-13	3171831	谢银有	男	44Y	下颌骨骨折		好转	徐兴侨	肖进	汪池
272	C03眼科口腔	2021-12-11	2021-12-15	3172343	陈时岗	男	47Y	取除骨折内固定装置		其他	冯旺强	韩晓辉	林达	面骨内固定物取出术
273	C03眼科口腔	2021-12-01	2021-12-18	3173058	王泽凯	男	6Y	眶骨骨折	眼内出血;视神经损伤;上睑下垂;眉部损伤;面部软组织挫伤	治愈	冯旺强	董志章	林达	眶骨骨折闭合复位术
274	C03眼科口腔	2021-12-07	2021-12-18	3173270	林学玲	男	52Y	眼球破裂	浆液性视网膜脱离;眼睑裂伤;眶骨骨折;眼内出血	治愈	冯旺强	董志章	林达	眼球破裂修补术;后入路玻璃体切割术;眼睑裂伤缝合术
275	C03眼科口腔	2021-12-15	2021-12-23	3175087	项建国	男	48Y	取除骨折内固定装置		其他		肖进	汪池	面骨内固定物取出术
276	C03眼科口腔	2021-12-18	2021-12-25	3175625	陈丽平	女	35Y	眶骨骨折	眼睑裂伤	治愈	冯旺强	董志章	林达	眶骨骨折闭合复位术
277	C03眼科口腔	2021-12-15	2021-12-26	3175889	杜秀芳	女	24Y	下颌骨骨折		治愈		肖进	汪池	下颌骨骨折切开复位内固定术
278	C03眼科口腔	2021-12-18	2021-12-27	3176387	范鳛郦	男	22Y	眶骨骨折	急性泪囊炎;特指手术后状态	治愈	冯旺强	董志章	林达	泪囊-鼻腔吻合术[DCR手术];眶骨骨折闭合复位术
279	C03眼科口腔	2021-12-13	2021-12-27	3176389	王雪妹	女	46Y	眶骨骨折	颧骨骨折;屈光不正	治愈	冯旺强	董志章	林达	颧骨骨折闭合复位术;眶骨骨折闭合复位术
280	C03眼科口腔	2021-12-20	2021-12-28	3176663	胡秀芹	女	74Y	腰椎骨折	双眼白内障;急性闭角型青光眼;陈旧性胸椎骨折;高血压病;肺气肿;脑梗死;慢性胃炎;脂肪肝;骨质疏松	好转	韩晓辉	董志章	林达	腰椎骨折球囊扩张成形术
281	C03眼科口腔	2021-12-11	2021-12-28	3176916	邹宋娟	女	30Y	取除骨折内固定装置		其他	冯旺强	韩晓辉	骆伊丽	面骨内固定物取出术
282	C03眼科口腔	2021-12-10	2021-12-29	3177165	雷昌文	男	49Y	眶骨骨折	上颌骨骨折;创伤性牙齿脱落	治愈	韩晓辉	韩晓辉	骆伊丽	上颌骨骨折闭合复位术;眶骨骨折闭合复位术
283	C04综合病房	2020-12-28	2021-01-03	3054920	陈庆华	男	39Y	取除骨折内固定装置		其他	陈龙	陈龙	陈龙	胫骨内固定物取出术
284	C04综合病房	2021-01-03	2021-01-08	3056388	姜远财	男	43Y	取除骨折内固定装置		其他	翁益民	翁益民	柯陈荣	尺骨内固定物取出术
285	C04综合病房	2021-01-03	2021-01-10	3056998	尹玉燕	女	34Y	腓骨骨折		治愈	陈龙	陈龙	应晓洲
286	C04综合病房	2021-01-23	2021-01-25	3063035	谢铭轩	男	8Y	取除骨折内固定装置		其他	陈龙	陈龙	陈龙	胫骨内固定物取出术
287	C04综合病房	2020-12-09	2021-02-04	3065135	林津津	女	71Y	脱髓鞘性脊髓炎	骨质疏松伴病理性骨折;运动障碍;下腔静脉血栓形成;多发性脑梗死;高血压病;颈动脉硬化;下肢动脉粥样硬化;神经源性膀胱;脊柱侧弯;颈椎间盘突出	好转	刘宝华	刘宝华	钟燕彪
288	C04综合病房	2020-12-19	2021-02-07	3065746	郑爱鹤	女	76Y	四肢瘫痪	言语障碍;甲状腺结节;高脂血症;颈动脉硬化;下肢动脉粥样硬化;上肢动脉粥样硬化;脑梗死后遗症;胆囊结石;心律失常;完全性右束支传导阻滞;左前分支传导阻滞;肥厚型梗阻性心肌病;高血压病;吞咽困难;骨质疏松伴病理性骨折;2型糖尿病性肾病;贫血	好转	刘宝华	刘宝华	余洳如
289	C04综合病房	2021-02-17	2021-02-22	3071121	林政治	男	29Y	取除骨折内固定装置		其他	洪建军	余洋	余洋	踝关节内固定物取出术
290	C04综合病房	2021-02-20	2021-02-24	3072009	程雅微	女	7Y	取除骨折内固定装置		其他	徐兴侨	肖进	黄武	面骨内固定物取出术
291	C04综合病房	2021-02-04	2021-03-08	3075917	林津津	女	72Y	视神经脊髓炎	运动障碍;皮肤感觉障碍;神经源性膀胱;多发性脑梗死;下肢动脉粥样硬化;脊柱侧弯;颈椎间盘突出;高血压病;骨质疏松伴病理性骨折;颈动脉硬化	好转	刘宝华	刘宝华	钟燕彪
292	C04综合病房	2021-03-07	2021-03-15	3078220	杨洪忠	男	48Y	多部位肌肉和肌腱损伤	前臂特指伸肌和肌腱损伤;肩胛骨骨折;头皮血肿;创伤性三角肌断裂;创伤性肱三头肌断裂;创伤性肱二头肌断裂;前臂特指手指伸肌和肌腱损伤	好转	吴伟军	吴伟军	吴伟军	伸腕肌腱缝合术;肱三头肌缝合术;肱二头肌缝合术;三角肌缝合术;筋膜缝合术;皮肤和皮下坏死组织切除清创术;伸指肌腱缝合术
293	C04综合病房	2021-03-06	2021-03-17	3078698	张连芳	男	48Y	脾损伤	腹腔内出血;肺挫伤;肋骨骨折;尺骨下端骨折	治愈	王飞海	王飞海	周磊	脾切除术
294	C04综合病房	2021-04-03	2021-04-25	3091647	曹水姣	女	43Y	胰损伤	肺水肿;腹腔感染;特指手术后状态;胸腔积液;肺挫伤;多发性肋骨骨折	好转	王飞海	周磊	周磊
295	C04综合病房	2021-04-04	2021-04-27	3092690	李世荣	女	58Y	肠扭转	骨盆骨折;骨折治疗后恢复期;腰椎骨折;肋骨骨折;小肠憩室病;肠粘连;下肢深静脉血栓性静脉炎	治愈	吴伟军	吴伟军	吴伟军	肠粘连松解术;下肢静脉滤器置入术;小肠扭转复位术;下肢静脉造影;小肠病损切除术
296	C04综合病房	2021-04-08	2021-05-24	3101616	吴建富	男	43Y	创伤性小肠破裂	急性弥漫性腹膜炎;眼损伤;胸腔积液;感染性休克;肋骨骨折;骨盆骨折;肝炎后肝硬化	治愈	吴伟军	邓应彬	邓应彬	小肠破裂修补术;肠粘连松解术;腹腔冲洗检查
297	C04综合病房	2021-05-09	2021-05-25	3102063	廖友情	男	32Y	创伤性脾破裂	腹水;肋骨骨折;失血性休克	治愈	王飞海	王飞海	周磊	胰尾切除术;脾切除术
298	C04综合病房	2021-05-13	2021-05-26	3102454	刘潇	男	24Y	创伤性脾破裂	腹水;肋骨骨折;失血性休克	治愈	倪仲琳	黄和	黄和	腹腔冲洗检查;脾切除术
299	C04综合病房	2021-04-17	2021-06-13	3108205	无名1501	男	40Y	多发性损伤	腹直肌断裂;失血性休克;尺骨骨折;肱骨外髁骨折;胫骨骨折;股骨骨折;创伤性肠破裂	治愈	王飞海	黄和	黄和	腹膜缝合术;尺骨骨折切开复位术;腹直肌缝合术;肱骨骨折切开复位术;胫骨骨折切开复位术;股骨骨折切开复位术;小肠破裂修补术;腹腔冲洗检查
300	C04综合病房	2021-05-26	2021-06-15	3108920	金春飞	女	50Y	创伤性脾破裂	失血性休克;腹水;硬膜外血肿;脑挫伤;气胸;肺挫伤;肋骨骨折;头皮血肿;脂肪肝	治愈	吴伟军	邓应彬	叶孙志	脾切除术;腹腔冲洗检查;剖腹探查术
301	C04综合病房	2021-06-03	2021-06-23	3111752	杨刚	男	30Y	脾损伤	肺挫伤;多发性骨盆骨折;髂骨骨折;骶骨骨折;耻骨骨折;肱骨上端骨折;多发性肋骨骨折	治愈	吴伟军	邓应彬	叶孙志	骨盆骨折切开复位钢板内固定术;肱骨骨折切开复位术
302	C04综合病房	2021-06-27	2021-06-29	3113656	黄安生	男	43Y	取除骨折内固定装置	脂肪肝;前列腺结石;肝囊肿	其他	陈华	孙辽军	孙辽军	膝关节内固定物取出术
303	C04综合病房	2021-07-03	2021-07-04	3115388	李仁杰	男	15Y	取除骨折内固定装置	肝钙化灶;脾大	其他	陈龙	陈龙	应晓洲	桡骨内固定物取出术
304	C04综合病房	2021-07-03	2021-07-04	3115457	王安治	男	17Y	取除骨折内固定装置		其他	陈龙	陈龙	应晓洲	桡骨内固定物取出术
305	C04综合病房	2021-07-03	2021-07-05	3115544	陈志英	女	60Y	取除骨折内固定装置	后天性肾囊肿	其他	陈龙	陈龙	应晓洲	肱骨内固定物取出术
306	C04综合病房	2021-07-03	2021-07-05	3115627	陈玉兰	女	54Y	取除骨折内固定装置	肝血管肉瘤	其他	陈龙	陈龙	应晓洲	桡骨内固定物取出术
307	C04综合病房	2021-07-06	2021-07-07	3116580	邓显光	男	49Y	取除骨折内固定装置		其他	陈龙	陈龙	应晓洲	桡骨内固定物取出术
308	C04综合病房	2021-07-10	2021-07-11	3117821	吴杭	男	13Y	取除骨折内固定装置		其他	陈龙	陈龙	应晓洲	桡骨内固定物取出术
309	C04综合病房	2021-07-10	2021-07-12	3118175	赵章彬	男	14Y	取除骨折内固定装置		其他	陈龙	陈龙	应晓洲	肱骨内固定物取出术
310	C04综合病房	2021-07-13	2021-07-14	3119010	夏芬芬	女	27Y	取除骨折内固定装置		其他	陈龙	陈龙	应晓洲	踝关节内固定物取出术
311	C04综合病房	2021-07-13	2021-07-14	3119015	刘海若	男	40Y	取除骨折内固定装置	脂肪肝	其他	陈龙	陈龙	应晓洲	踝关节内固定物取出术
312	C04综合病房	2021-07-12	2021-07-14	3119042	谢华境	男	15Y	取除骨折内固定装置		其他	陈华	孙辽军	孙辽军	骨盆内固定物取出术
313	C04综合病房	2021-07-17	2021-07-18	3120465	黄宝香	女	54Y	取除骨折内固定装置	手术后随诊检查;高血压病;肾萎缩	其他	陈龙	陈龙	应晓洲	髌骨内固定物取出术
314	C04综合病房	2021-07-17	2021-07-18	3120469	王鹤	男	26Y	取除骨折内固定装置		其他	陈龙	陈龙	陈龙	跟骨内固定物取出术
315	C04综合病房	2021-07-17	2021-07-18	3120472	尤大巧	男	62Y	取除骨折内固定装置	脂肪肝;后天性肾囊肿	其他	陈龙	陈龙	应晓洲	踝关节内固定物取出术
316	C04综合病房	2021-04-26	2021-07-19	3120563	冯焕君	男	40Y	关闭回肠造口	创伤性蛛网膜下腔出血;腹水;特指手术随诊医疗;鞘膜积液;胸腔积液;肋骨骨折	其他	杨越涛	王奕庚	闻浩	回肠造口还纳术;回肠部分切除术;肠粘连松解术
317	C04综合病房	2021-07-17	2021-07-19	3120902	钟银霞	女	22Y	取除骨折内固定装置	肝钙化灶	其他	陈龙	陈龙	应晓洲	锁骨内固定物取出术
318	C04综合病房	2021-07-18	2021-07-20	3121281	沈光耀	男	13Y	取除骨折内固定装置		其他	赵友明	赵友明	郭伟军	胫骨内固定物取出术
319	C04综合病房	2021-06-30	2021-07-22	3122018	谢定爱	女	68Y	胆囊结石伴急性胆囊炎	高血压病;肱骨外科颈骨折;中度视力缺损，双眼	治愈	吴伟军	邓应彬	叶孙志	胆囊切除术;肱骨骨折闭合复位术
320	C04综合病房	2021-07-24	2021-07-24	3122693	叶莲菊	女	48Y	取除骨折内固定装置	脂肪肝	其他	陈龙	陈龙	应晓洲
321	C04综合病房	2021-07-24	2021-07-26	3123320	朱德炎	男	16Y	取除骨折内固定装置	脂肪肝	其他	陈龙	陈龙	应晓洲	肱骨内固定物取出术
322	C04综合病房	2021-07-24	2021-07-26	3123322	郑寒	男	16Y	取除骨折内固定装置	肝囊肿	其他	陈龙	陈龙	应晓洲	骨盆内固定物取出术
323	C04综合病房	2021-07-06	2021-07-27	3123632	王兴浩	男	74Y	创伤性脾破裂	肋骨骨折;高血压病;锁骨骨折	治愈	倪仲琳	倪仲琳	黄和	锁骨骨折切开复位术;脾切除术
324	C04综合病房	2021-07-24	2021-07-27	3123800	王秀西	女	38Y	取除骨折内固定装置		其他	陈龙	陈龙	应晓洲	股骨内固定物取出术
325	C04综合病房	2021-07-26	2021-07-28	3124118	章皓惠	男	14Y	取除骨折内固定装置		其他	赵友明	赵友明	郭伟军	踝关节内固定物取出术
326	C04综合病房	2021-07-26	2021-07-28	3124159	程菊莲	女	55Y	取除骨折内固定装置	高血压病;后天性肾囊肿;脂肪肝	其他	赵友明	赵友明	郭伟军	肱骨内固定物取出术
327	C04综合病房	2021-07-27	2021-07-28	3124160	尹超央	女	60Y	取除骨折内固定装置		其他	陈龙	陈龙	应晓洲	踝关节内固定物取出术
328	C04综合病房	2021-07-27	2021-07-28	3124166	洪忠魁	男	66Y	取除骨折内固定装置		其他	陈龙	陈龙	应晓洲	踝关节内固定物取出术
329	C04综合病房	2021-07-31	2021-08-01	3125523	叶光洪	男	69Y	取除骨折内固定装置	前列腺结石;胆囊息肉	其他	余可和	余可和	卢晓郎	踝关节内固定物取出术
330	C04综合病房	2021-07-31	2021-08-02	3125845	朱加潍	男	13Y	取除骨折内固定装置	抑郁性品行障碍	其他	陈龙	陈龙	应晓洲	胫骨内固定物取出术
331	C04综合病房	2021-07-31	2021-08-02	3125846	刘伊盈	女	11Y	取除骨折内固定装置		其他	陈龙	陈龙	应晓洲	胫骨内固定物取出术
332	C04综合病房	2021-07-31	2021-08-02	3125848	叶莲菊	女	48Y	取除骨折内固定装置		其他	陈龙	陈龙	应晓洲	胫骨内固定物取出术
333	C04综合病房	2021-08-02	2021-08-04	3126614	黄小飞	女	58Y	取除骨折内固定装置	人工髋关节	其他	余可和	余可和	卢晓郎	踝关节内固定物取出术
334	C04综合病房	2021-02-16	2021-08-05	3126861	Я无名841	男	52Y	骨盆骨折	肠瘘;腹壁疝;腹膜损伤;髂外静脉血栓形成;截肢残端溃疡;肋骨骨折;髋臼骨折;骶骨骨折;关节瘘;失血性休克	治愈	杨越涛	杨越涛	闻浩	皮肤和皮下坏死组织切除清创术;皮肤和皮下组织切开引流术;回肠-降结肠吻合术;腹腔粘连松解术;乙状结肠瘘修补术;腹膜组织修补术;乙状结肠造口还纳术;骨盆切除术;皮肤和皮下组织血肿抽吸术;结肠造口扩大术;骨盆骨折闭合复位术;髋关节离断术;腹股沟探查术
335	C04综合病房	2021-08-04	2021-08-05	3126971	董子健	男	12Y	取除骨折内固定装置		其他	余可和	余可和	卢晓郎	桡骨内固定物取出术;尺骨内固定物取出术
336	C04综合病房	2021-08-07	2021-08-08	3127755	杨洪波	男	30Y	取除骨折内固定装置	脂肪肝	其他	陈龙	陈龙	应晓洲	趾骨内固定物取出术
337	C04综合病房	2021-08-07	2021-08-08	3127810	董文坚	男	12Y	取除骨折内固定装置		其他	陈龙	陈龙	应晓洲	锁骨内固定物取出术
338	C04综合病房	2021-08-07	2021-08-09	3128145	晏和平	男	54Y	取除骨折内固定装置	肋骨骨折	其他	陈龙	陈龙	应晓洲	趾骨内固定物取出术
339	C04综合病房	2021-08-07	2021-08-09	3128182	黄玉章	男	34Y	取除骨折内固定装置		其他	陈龙	陈龙	应晓洲	股骨内固定物取出术
340	C04综合病房	2021-08-08	2021-08-10	3128558	刘发明	男	31Y	取除骨折内固定装置	脂肪肝	其他	余可和	余可和	卢晓郎	胫骨内固定物取出术
341	C04综合病房	2021-08-10	2021-08-11	3129156	王昌庄	男	54Y	取除骨折内固定装置	肾结石;后天性肾囊肿;胆囊息肉;肝血管瘤	其他	陈龙	陈龙	应晓洲	髌骨内固定物取出术
342	C04综合病房	2021-08-14	2021-08-15	3130598	邱可颖	女	10Y	取除骨折内固定装置		其他	陈龙	陈龙	应晓洲	股骨内固定物取出术
343	C04综合病房	2021-08-15	2021-08-17	3131101	宗爱琴	男	61Y	取除骨折内固定装置	脂肪肝;肾积水伴肾输尿管结石;前列腺结石	其他	余可和	余可和	卢晓郎	肩锁关节内固定物取出术
344	C04综合病房	2021-08-17	2021-08-18	3131703	贾挺克	男	42Y	取除骨折内固定装置		其他	王振文	水小龙	水小龙	锁骨内固定物取出术
345	C04综合病房	2021-08-18	2021-08-20	3132229	潘洪瑞	男	21Y	取除骨折内固定装置	甲沟炎;嵌甲	其他	余可和	余可和	卢晓郎	拔甲术;趾骨内固定物取出术
346	C04综合病房	2021-08-20	2021-08-22	3133054	陈海鸥	女	38Y	急性阑尾炎	骨盆骨折	治愈	倪仲琳	黄和	217072	腹腔镜下阑尾切除术
347	C04综合病房	2021-08-24	2021-08-26	3134430	翁明霞	女	66Y	取除骨折内固定装置	高血压病	其他	陈龙	陈龙	应晓洲	肩锁关节内固定物取出术
348	C04综合病房	2021-08-21	2021-08-26	3134431	黄美农	女	70Y	取除骨折内固定装置	肝囊肿	其他	陈龙	陈龙	应晓洲	跟骨内固定物取出术
349	C04综合病房	2021-08-25	2021-08-27	3134737	周子凯	男	15Y	取除骨折内固定装置		其他	王振文	水小龙	217094	锁骨内固定物取出术
350	C04综合病房	2021-08-26	2021-08-28	3135127	宋正洪	男	56Y	取除骨折内固定装置	脂肪肝;肾结石	其他	陈龙	陈龙	应晓洲	腓骨内固定物取出术
351	C04综合病房	2021-08-28	2021-08-29	3135576	裴光明	男	27Y	取除骨折内固定装置	肝囊肿	其他	陈龙	陈龙	应晓洲	锁骨内固定物取出术
352	C04综合病房	2021-08-10	2021-08-29	3135581	周旺	男	46Y	创伤性脾破裂	腓骨骨折;皮肤挫伤;特指手术后状态	好转	王飞海	周磊	周磊
353	C04综合病房	2021-08-28	2021-08-29	3135597	陈少芬	女	53Y	取除骨折内固定装置	脂肪肝;胆囊息肉;后天性肾囊肿;胆囊结石	其他	陈龙	陈龙	应晓洲	胫骨内固定物取出术
354	C04综合病房	2021-09-02	2021-09-06	3138323	龚辉	男	42Y	泌尿道感染	肾积水伴输尿管结石;特指手术后状态;多发性肝囊肿;骨折治疗后恢复期	治愈	王飞海	王飞海	周磊
355	C04综合病房	2021-08-29	2021-09-08	3139181	张秀年	女	44Y	眼睑和眼周区开放性伤口	肝损伤;眼挫伤;眶骨骨折	治愈	王飞海	周磊	周磊	皮肤和皮下坏死组织切除清创术;内眦成形术;泪小管吻合术
356	C04综合病房	2021-09-03	2021-09-12	3140321	金建鑫	男	46Y	鼻骨骨折	面部软组织挫伤;肌腱和肌肉损伤	治愈	吴伟军	邓应彬	金灿
357	C04综合病房	2021-08-09	2021-09-13	3140561	林碎奴	男	81Y	结肠恶性肿瘤	膀胱结石;后天性肾囊肿;前列腺增生;脑梗死;高血压病;完全性右束支传导阻滞;陈旧性下肢骨折;阑尾缺如;胆管结石	好转	倪仲琳	黄和	姚志超	淋巴结扩大性区域性切除术;结肠部分切除术
358	C04综合病房	2021-09-16	2021-09-25	3144744	应阿弟	女	84Y	急性坏疽性阑尾炎伴穿孔	急性腹膜炎;肺部感染;胸腔积液;胆囊结石;高血压病;骨折治疗后恢复期	治愈	倪仲琳	黄和	姚志超	腹腔冲洗检查;阑尾切除术
359	C04综合病房	2021-09-24	2021-09-28	3145884	谢小华	女	49Y	特指趾骨骨折		治愈	翁益民	翁益民	柯陈荣	趾骨骨折闭合复位术
360	C04综合病房	2021-09-22	2021-10-01	3147252	陈小华	女	79Y	股骨粗隆间骨折	恶性肿瘤放射治疗后随诊检查;消化道出血;混合痔	治愈	黄和	黄和	姚志超	股骨骨折切开复位术
361	C04综合病房	2021-09-19	2021-10-03	3147753	郑小春	女	62Y	肠梗阻	腰椎骨折	好转	吴伟军	吴伟军	吴伟军
362	C04综合病房	2021-09-24	2021-10-13	3150468	李合理	男	43Y	创伤性脾破裂	肌腱和肌肉损伤;急性肝衰竭;腹水;急性肾衰竭;肺挫伤;乙型肝炎后肝硬化失代偿期;脾大;肋骨骨折;头皮血肿	好转	倪仲琳	黄和	姚志超	脾动脉栓塞术;腹腔动脉造影
363	C04综合病房	2021-10-16	2021-10-18	3152109	郑卫岳	男	34Y	取除骨折内固定装置		其他	陈龙	陈龙	陈龙	胫骨内固定物取出术
364	C04综合病房	2021-10-16	2021-10-18	3152111	朱剑	男	39Y	取除骨折内固定装置	脂肪肝	其他	陈龙	陈龙	陈龙	髌骨内固定物取出术
365	C04综合病房	2021-10-16	2021-10-19	3152428	王浙江	男	49Y	取除骨折内固定装置	脂肪肝	其他	陈龙	陈龙	陈龙	股骨内固定物取出术
366	C04综合病房	2021-10-05	2021-10-19	3152580	陈智	男	35Y	肝损伤	腹水;胸腔积液;肋骨骨折	治愈	王飞海	周磊	周磊	腹壁裂伤缝合术;肝破裂修补术
367	C04综合病房	2021-10-16	2021-10-20	3152742	叶海燕	女	47Y	取除骨折内固定装置	重度贫血	其他	陈龙	陈龙	陈龙	髌骨内固定物取出术
368	C04综合病房	2021-10-18	2021-10-20	3152836	王荣学	男	44Y	取除骨折内固定装置		其他	王振文	水小龙	卢迪	胫骨内固定物取出术
369	C04综合病房	2021-10-18	2021-10-20	3152838	李福锁	男	55Y	取除骨折内固定装置		其他	王振文	水小龙	卢迪	胫骨内固定物取出术
370	C04综合病房	2021-10-19	2021-10-20	3152851	陈圣钗	女	57Y	取除骨折内固定装置	脂肪肝	其他	陈龙	陈龙	陈龙	桡骨内固定物取出术
371	C04综合病房	2021-09-29	2021-10-20	3152944	潘元敏	男	62Y	胆总管结石	股骨粗隆间骨折;手术随诊医疗;梗阻性黄疸;2型糖尿病;恶性肿瘤手术后随诊检查	治愈	倪仲琳	黄和	姚志超	胆总管切开取石术;十二指肠瘘闭合术;肠粘连松解术
372	C04综合病房	2021-10-09	2021-10-23	3153750	杨秀微	女	67Y	腰疝	腰椎间盘突出;骨质疏松;病理性骨折	治愈	倪仲琳	黄和	姚志超	腰疝修补术
373	C04综合病房	2021-10-23	2021-10-24	3154235	黄思静	男	67Y	取除骨折内固定装置		其他	陈龙	陈龙	陈龙	踝关节内固定物取出术
374	C04综合病房	2021-10-23	2021-10-24	3154260	叶建明	男	55Y	取除骨折内固定装置		其他	陈龙	陈龙	陈龙	锁骨内固定物取出术
375	C04综合病房	2021-10-23	2021-10-25	3154619	刘奎文	男	34Y	取除骨折内固定装置	骨折治疗后恢复期	其他	陈龙	陈龙	陈龙	桡骨内固定物取出术
376	C04综合病房	2021-10-23	2021-10-25	3154623	李秀凤	女	64Y	骨折治疗后恢复期		其他	陈龙	陈龙	陈龙	胫骨内固定物取出术
377	C04综合病房	2021-10-23	2021-10-25	3154628	徐代杰	男	39Y	取除骨折内固定装置	足拇长伸肌腱断裂	其他	陈龙	陈龙	陈龙	肌腱紧缩术;桡骨内固定物取出术
378	C04综合病房	2021-10-25	2021-10-27	3155377	黄梁红	女	55Y	取除骨折内固定装置		其他	王振文	水小龙	卢迪	肱骨内固定物取出术
379	C04综合病房	2021-10-24	2021-10-31	3156479	邹光有	男	78Y	肠梗阻	大手术个人史;胆囊结石;高血压病;2型糖尿病;脑卒中后遗症;骨折治疗后恢复期	治愈	王飞海	周磊	周磊
380	C04综合病房	2021-10-27	2021-10-31	3156730	程慧琳	女	12Y	骨盆骨折		治愈	杨雷	杨雷	张月雷	骨盆骨折切开复位钢板内固定术
381	C04综合病房	2021-10-30	2021-10-31	3156739	张玲海	男	36Y	取除骨折内固定装置		其他	陈龙	陈龙	陈龙	跗骨内固定物取出术
382	C04综合病房	2021-10-30	2021-11-01	3157136	陈生生	男	61Y	取除骨折内固定装置	肝囊肿;脂肪肝	其他	陈龙	陈龙	陈龙	尺骨内固定物取出术;髌骨内固定物取出术
383	C04综合病房	2021-10-30	2021-11-01	3157144	王海燕	女	36Y	取除骨折内固定装置	脂肪肝	其他	陈龙	陈龙	陈龙	肱骨内固定物取出术
384	C04综合病房	2021-10-30	2021-11-01	3157176	刘春丽	女	51Y	取除骨折内固定装置	肝血管瘤;肝钙化灶	其他	陈龙	陈龙	陈龙	踝关节内固定物取出术
385	C04综合病房	2021-11-01	2021-11-03	3157855	江菊青	女	48Y	取除内固定装置	肋骨骨折;肱骨骨折;动脉粥样硬化	其他	赵友明	赵友明	卢迪	肱骨内固定物取出术
386	C04综合病房	2021-11-01	2021-11-03	3157856	吴作英	女	60Y	取除骨折内固定装置	高血压病;心功能不全;肾结石;胆囊息肉	其他	赵友明	赵友明	陈德横	胫骨内固定物取出术
387	C04综合病房	2021-10-31	2021-11-03	3157857	朱芬迪	女	66Y	取除骨折内固定装置		其他	杨雷	杨雷	张月雷	踝关节内固定物取出术
388	C04综合病房	2021-10-30	2021-11-03	3157925	郭剑飞	男	14Y	取除骨折内固定装置		其他	陈龙	陈龙	应晓洲	骨盆内固定物取出术
389	C04综合病房	2021-11-03	2021-11-05	3158403	郑功绩	男	34Y	取除骨折内固定装置	胆囊息肉;肝回声不均	其他	王振文	王振文	水小龙	髌骨内固定物取出术
390	C04综合病房	2021-10-20	2021-11-06	3158477	陈沛明	男	21Y	创伤性脾破裂	腹壁挫伤;腹腔积血;脑挫伤;肋骨骨折;液气胸;肺挫伤;肾挫伤;骶骨骨折;耻骨骨折;腰椎和骨盆特指部位脱位;颈部和躯干特指损伤后遗症;肌腱和肌肉损伤;多发性损伤	治愈	倪仲琳	黄和	姚志超	腹壁裂伤缝合术;腹腔冲洗检查;脾切除术
391	C04综合病房	2021-10-22	2021-11-07	3159289	黄新月	女	43Y	脾损伤	肩胛骨骨折;肺挫伤;头皮血肿;多发性肋骨骨折;腹水;多发性损伤;脂肪肝;肝囊肿;胆囊息肉;骨盆骨折;踝关节肿胀;腓骨骨折;骶髂关节炎;腰椎骨折;副脾;肾结石	治愈	倪仲琳	黄和	姚志超
392	C04综合病房	2021-11-06	2021-11-08	3159398	单秀兰	女	65Y	取除骨折内固定装置	急性糜烂性胃炎;膝关节病;手术后随诊检查;2型糖尿病;恶性肿瘤手术后随诊检查;高血压病	其他	陈龙	陈龙	应晓洲	髌骨内固定物取出术
393	C04综合病房	2021-11-06	2021-11-08	3159404	腾孟川	男	5Y	取除骨折内固定装置		其他	陈龙	陈龙	应晓洲	胫骨内固定物取出术
394	C04综合病房	2021-11-06	2021-11-08	3159408	董建杰	男	42Y	取除骨折内固定装置	脂肪肝	其他	陈龙	陈龙	应晓洲	掌骨内固定物取出术
395	C04综合病房	2021-11-06	2021-11-11	3160620	黄存总	男	67Y	取除骨折内固定装置	肺结节	其他	陈龙	陈龙	应晓洲	掌骨内固定物取出术
396	C04综合病房	2021-11-09	2021-11-12	3160832	范国春	男	48Y	取除骨折内固定装置	后天性肾囊肿;前列腺结石;前列腺增生	其他	余可和	余可和	何自力	胫骨内固定物取出术
397	C04综合病房	2021-11-09	2021-11-12	3160939	王烁豪	男	23Y	取除骨折内固定装置	后天性肾囊肿	其他	余可和	余可和	何自力	股骨内固定物取出术
398	C04综合病房	2021-11-16	2021-11-16	3162527	刘洪蓉	女	70Y	骨质疏松	骨折治疗后恢复期	好转	汤骏	汤骏	吴剑彬
399	C04综合病房	2021-11-20	2021-11-22	3164486	叶怀暂	男	40Y	取除骨折内固定装置	肝血管瘤	其他	陈龙	陈龙	应晓洲	跖骨内固定物取出术
400	C04综合病房	2021-11-20	2021-11-24	3165055	俞平	男	45Y	取除骨折内固定装置	胆囊息肉;肝钙化灶	其他	陈龙	陈龙	应晓洲	跟骨内固定物取出术
401	C04综合病房	2021-11-22	2021-11-24	3165235	陈素华	男	66Y	取除骨折内固定装置	特指肾盂积水;高血压病;脂肪肝	其他	赵友明	赵友明	陈德横	腓骨内固定物取出术
402	C04综合病房	2021-11-22	2021-11-25	3165503	张超	男	37Y	取除骨折内固定装置	肾结石;脂肪肝	其他	赵友明	赵友明	陈德横	股骨内固定物取出术
403	C04综合病房	2021-11-20	2021-11-25	3165527	陈亨青	男	40Y	取除骨折内固定装置	脂肪肝;后天性肾囊肿	其他	陈龙	陈龙	应晓洲	跟骨内固定物取出术
404	C04综合病房	2021-11-25	2021-11-27	3166151	杨显锡	男	49Y	取除骨折内固定装置	脂肪肝;陈旧性腰椎骨折	其他	王振文	水小龙	水小龙	髌骨内固定物取出术
405	C04综合病房	2021-11-27	2021-11-29	3166921	杨希传	男	32Y	取除骨折内固定装置		其他	赵友明	赵友明	陈德横	桡骨内固定物取出术
406	C04综合病房	2021-11-27	2021-11-29	3166964	李文洪	男	41Y	取除骨折内固定装置		其他	赵友明	赵友明	陈德横	桡骨内固定物取出术
407	C04综合病房	2021-11-27	2021-11-30	3167283	柯婷婷	女	32Y	取除骨折内固定装置	肝囊肿;胆囊息肉	其他	余可和	余可和	何自力	尺骨内固定物取出术
408	C04综合病房	2021-11-27	2021-11-30	3167290	王于富	男	53Y	取除骨折内固定装置	糖尿病;高血压病	其他	赵友明	赵友明	陈德横	胫骨内固定物取出术
409	C04综合病房	2021-11-29	2021-11-30	3167293	项有花	女	55Y	取除骨折内固定装置	高血压病	其他	杨雷	杨雷	张月雷	骨盆内固定物取出术
410	C04综合病房	2021-11-27	2021-11-30	3167340	禹建辉	男	33Y	取除骨折内固定装置	2型糖尿病;胆囊息肉;乙型肝炎小三阳	其他	陈龙	陈龙	应晓洲	肱骨内固定物取出术
411	C04综合病房	2021-11-30	2021-12-02	3168007	陈燕燕	女	70Y	肱骨外科颈骨折	肩袖损伤;脂肪肝;肺部感染	治愈	陈龙	陈龙	应晓洲	肩袖修补术;肱骨骨折切开复位术
412	C04综合病房	2021-12-04	2021-12-06	3169340	林波	男	39Y	取除骨折内固定装置	乙型病毒性肝炎;膝关节病;脂肪肝;陈旧性肋骨骨折	其他	陈龙	陈龙	应晓洲	髌骨内固定物取出术
413	C04综合病房	2021-12-05	2021-12-07	3169660	潘元敏	男	62Y	胆总管结石	骨折治疗后恢复期;手术随诊医疗;恶性肿瘤手术后随诊检查;特指手术后状态;2型糖尿病	治愈	倪仲琳	黄和	姚志超	胆道镜检查术
414	C04综合病房	2021-12-05	2021-12-07	3169661	潘忠德	男	50Y	取除骨折内固定装置	肾结石;后天性肾囊肿	其他	余可和	余可和	卢晓郎	腓骨内固定物取出术
415	C04综合病房	2021-12-06	2021-12-08	3170096	林丽萍	女	59Y	取除骨折内固定装置	脂肪肝;特指手术后状态;高血压病	其他	赵友明	赵友明	陈德横	桡骨内固定物取出术
416	C04综合病房	2021-12-06	2021-12-08	3170098	倪栩俊	男	13Y	拇指骨折		治愈	赵友明	赵友明	陈德横	指骨骨折切开复位术
417	C04综合病房	2021-12-07	2021-12-09	3170230	胡允号	男	49Y	取除骨折内固定装置		其他	杨雷	周一飞	张月雷	胫骨内固定物取出术
418	C04综合病房	2021-12-04	2021-12-09	3170362	杨凯	男	25Y	鹰嘴骨折	肘关节骨折;肱骨外髁骨折	治愈	陈龙	陈龙	应晓洲	韧带修补术;尺骨骨折切开复位术
419	C04综合病房	2021-12-07	2021-12-09	3170369	温学坛	男	18Y	取除骨折内固定装置	运动障碍性脑瘫	其他	陈龙	陈龙	应晓洲	肱骨内固定物取出术
420	C04综合病房	2021-12-06	2021-12-09	3170372	胡乐迪	男	41Y	踝骨闭合性骨折	胫腓韧带上端撕裂;腓骨骨折	治愈	陈龙	陈龙	应晓洲	踝关节融合术;踝关节骨折闭合复位术
421	C04综合病房	2021-12-11	2021-12-13	3171541	陈文江	男	40Y	取除骨折内固定装置	肝囊肿	其他	陈龙	陈龙	应晓洲	踝关节内固定物取出术
422	C04综合病房	2021-12-11	2021-12-13	3171548	胡小琴	女	29Y	取除骨折内固定装置		其他	陈龙	陈龙	应晓洲	尺骨内固定物取出术
423	C04综合病房	2021-12-12	2021-12-14	3171900	林旭东	男	54Y	骨折治疗后恢复期		其他	余可和	余可和	卢晓郎	踝关节内固定物取出术
424	C04综合病房	2021-12-12	2021-12-14	3172122	潘秀燕	女	59Y	骨折治疗后恢复期		其他	余可和	余可和	卢晓郎	锁骨内固定物取出术
425	C04综合病房	2021-12-13	2021-12-15	3172498	张瑛	女	27Y	取除骨折内固定装置		其他	王振文	水小龙	何自力	踝关节内固定物取出术
426	C04综合病房	2021-12-13	2021-12-15	3172560	杨小岗	男	43Y	取除骨折内固定装置	多发性单下肢骨折;多发性骨盆骨折	其他	王振文	水小龙	何自力	跖骨内固定物取出术;尺骨内固定物取出术
427	C04综合病房	2021-12-14	2021-12-16	3172710	周绍根	男	29Y	锁骨骨折	乙型肝炎小三阳	治愈	陈龙	陈龙	应晓洲	锁骨骨折切开复位术
428	C04综合病房	2021-12-14	2021-12-16	3172750	叶海俊	男	40Y	取除骨折内固定装置	超声心动图异常;脂肪肝	其他	陈龙	陈龙	应晓洲	跟骨内固定物取出术
429	C04综合病房	2021-12-14	2021-12-16	3172780	仇荷花	女	54Y	鹰嘴骨折		治愈	陈龙	陈龙	应晓洲	尺骨骨折切开复位术
430	C04综合病房	2021-12-15	2021-12-18	3173282	蒋雪飞	女	41Y	取除骨折内固定装置		其他	石成弟	石成弟	张儒	踝关节内固定物取出术
431	C04综合病房	2021-12-15	2021-12-18	3173317	陈国松	男	59Y	取除骨折内固定装置	脊髓灰质炎后遗症;前列腺结石;脂肪肝	其他	石成弟	石成弟	张儒	股骨内固定物取出术
432	C04综合病房	2021-12-18	2021-12-19	3173776	姜伟	男	33Y	取除骨折内固定装置	乙型肝炎小三阳;肝囊肿;脂肪肝	其他	陈龙	陈龙	应晓洲	掌骨内固定物取出术
433	C04综合病房	2021-12-13	2021-12-20	3173898	黄麦克	男	29Y	肠系膜裂伤	腹水;腰椎骨折;肾结石;后天性肾囊肿;胃损伤;胆囊结石	好转	倪仲琳	黄和	姚志超
434	C04综合病房	2021-12-18	2021-12-20	3174168	冯瑞妹	女	41Y	取除骨折内固定装置	后天性肾囊肿	其他	陈龙	陈龙	应晓洲	踝关节内固定物取出术
435	C04综合病房	2021-12-18	2021-12-20	3174208	官开辉	男	34Y	取除骨折内固定装置	前列腺结石;胆囊息肉	其他	赵友明	赵友明	柯陈荣	肱骨内固定物取出术
436	C04综合病房	2021-12-22	2021-12-23	3175221	高爱蕉	女	54Y	取除骨折内固定装置	后天性肾囊肿;脂肪肝;高血压病;手术后随诊检查	其他	余可和	余可和	卢晓郎	指骨内固定物取出术
437	C04综合病房	2021-11-25	2021-12-26	3176099	林信鲁	男	44Y	创伤性脾破裂	失血性休克;腹水;多发性肋骨骨折;肺挫伤;胸腔积液	治愈	杨越涛	杨越涛	孟伟阳	脾穿刺;脾切除术;超声引导下胸腔穿刺术;腹腔冲洗检查
438	C04综合病房	2021-12-26	2021-12-28	3176683	戴国权	男	71Y	取除骨折内固定装置	特指手术后状态;下肢动脉粥样硬化;脂肪肝	其他	余可和	余可和	卢晓郎	锁骨内固定物取出术
439	C04综合病房	2021-12-17	2021-12-28	3176839	徐娟娟	女	33Y	胆囊结石伴慢性胆囊炎	肝囊肿;妊娠、分娩和产褥期并发症个人史;肱骨骨折	治愈	倪仲琳	黄和	姚志超	腹腔镜下胆囊切除术
440	C04综合病房	2021-12-29	2021-12-31	3177756	林丽姬	女	38Y	取除骨折内固定装置	特指手术后状态	其他	王振文	水小龙	何自力	胫骨内固定物取出术
441	C05疼痛科	2020-12-28	2021-01-03	3054710	吴爱妹	女	72Y	骨质疏松伴病理性骨折	胸椎骨折;手术后随诊检查	好转	占恭豪	申帮利	申帮利
442	C05疼痛科	2020-12-26	2021-01-03	3054846	杨秀凤	女	77Y	骨质疏松	脊柱骨折	治愈	占恭豪	占恭豪	黄茜茜
443	C05疼痛科	2020-12-26	2021-01-03	3055071	李领花	女	88Y	骨质疏松	特指手术后状态;高血压病;脊柱骨折	治愈	占恭豪	占恭豪	黄茜茜
444	C05疼痛科	2021-01-03	2021-01-04	3055429	周贞妤	女	8Y	桡骨下端骨折		好转	张敬东	易先宏	李玉安
445	C05疼痛科	2020-12-26	2021-01-05	3055452	陈秀凤	女	73Y	骨质疏松	脊柱骨折;高血压病	治愈	占恭豪	占恭豪	黄茜茜
446	C05疼痛科	2021-01-03	2021-01-09	3056633	林淑媚	女	77Y	骨质疏松伴病理性骨折	慢性胃炎	好转	许峰	许峰	何伶俐
447	C05疼痛科	2021-01-06	2021-01-09	3056639	李红玉	女	79Y	骨质疏松伴病理性骨折	甲状腺机能减退症;颈椎关节强硬;贫血;泌尿道感染	好转	许峰	许峰	何伶俐
448	C05疼痛科	2021-01-05	2021-01-09	3056815	王燕燕	女	83Y	骨质疏松	冠状动脉粥样硬化性心脏病;胃溃疡;2型糖尿病;脊柱骨折;高血压病	好转	占恭豪	占恭豪	王佩芳
449	C05疼痛科	2021-01-03	2021-01-13	3058125	张锡妹	女	85Y	腰椎间盘突出	膝关节炎;骨质疏松伴病理性骨折	治愈	许峰	许峰	何伶俐
450	C05疼痛科	2021-01-11	2021-01-16	3059032	杨宝英	女	79Y	骨质疏松	胸椎骨折	好转	占恭豪	占恭豪	黄茜茜
451	C05疼痛科	2021-01-09	2021-01-18	3059964	王兰香	女	80Y	骨质疏松	脊柱骨折;腰椎滑脱	好转	占恭豪	占恭豪	黄茜茜
452	C05疼痛科	2021-01-14	2021-01-18	3059969	蔡金珠	女	47Y	取除骨折内固定装置		其他	陈华	孙辽军	蔡乐益	尺骨内固定物取出术
453	C05疼痛科	2021-01-09	2021-01-20	3060618	张香兰	女	72Y	骨质疏松	胸椎骨折;高血压病;糖尿病;焦虑状态;冠状动脉粥样硬化性心脏病;类风湿性关节炎	好转	占恭豪	占恭豪	黄茜茜
454	C05疼痛科	2020-12-30	2021-01-24	3062476	陈玉香	女	79Y	骨质疏松伴病理性骨折		好转	许峰	许峰	何伶俐
455	C05疼痛科	2021-01-09	2021-01-24	3062524	金成华	女	65Y	恶性肿瘤的维持性化疗	脑梗死;脑继发恶性肿瘤;肱骨骨折;腹部恶性肿瘤	好转	吴剑	吴剑	林瑞芳
456	C05疼痛科	2021-02-06	2021-02-13	3067694	潘凤彩	女	87Y	骨质疏松伴病理性骨折	高血压病;脊柱骨折;冠状动脉粥样硬化性心脏病	好转	占恭豪	占恭豪	田心毅
457	C05疼痛科	2021-02-04	2021-02-13	3067700	叶金莲	女	86Y	骨质疏松	高血压病;特指手术随诊医疗;2型糖尿病;胸椎骨折;高脂血症	好转	占恭豪	占恭豪	王佩芳
458	C05疼痛科	2021-02-04	2021-02-13	3067767	林莲英	女	70Y	骨质疏松伴病理性骨折		好转	占恭豪	占恭豪	王佩芳
459	C05疼痛科	2021-02-03	2021-02-16	3068933	林阿微	女	65Y	骨质疏松伴病理性骨折	高血压病	好转	许峰	许峰	何伶俐
460	C05疼痛科	2021-02-15	2021-02-20	3070219	汪玉昌	男	88Y	骨质疏松伴病理性骨折		好转	占恭豪	占恭豪	黄茜茜
461	C05疼痛科	2021-02-10	2021-02-20	3070252	金仕甫	男	75Y	腰椎骨折	肌腱和肌肉损伤	治愈	许峰	许峰	何伶俐
462	C05疼痛科	2021-02-13	2021-02-20	3070473	金来春	男	83Y	骨质疏松伴病理性骨折	慢性支气管炎;慢性阻塞性肺病;高血压病	治愈	占恭豪	占恭豪	黄茜茜
463	C05疼痛科	2021-02-03	2021-02-27	3072555	蒋金唐	女	62Y	骨质疏松伴病理性骨折	特指手术后状态;声带息肉;急性咽炎;幽门螺旋杆菌感染	好转	占恭豪	占恭豪	黄茜茜	腰椎间盘造影
464	C05疼痛科	2021-02-21	2021-02-28	3073062	谢红月	女	64Y	骨质疏松伴病理性骨折	高血压病	好转	许峰	许峰	何伶俐
465	C05疼痛科	2021-02-24	2021-03-02	3073727	陈碎柳	女	77Y	骨质疏松伴病理性骨折	高血压病;糖尿病	好转	占恭豪	占恭豪	黄茜茜
466	C05疼痛科	2021-02-24	2021-03-02	3073731	张有玉	女	85Y	骨质疏松	焦虑状态;胸椎骨折;高血压病;下肢动脉硬化闭塞症	好转	占恭豪	占恭豪	黄茜茜
467	C05疼痛科	2021-02-24	2021-03-02	3073736	李红玉	女	79Y	骨质疏松伴病理性骨折	碘性甲状腺机能减退;单纯性慢性贫血;颈椎关节强硬	好转	占恭豪	占恭豪	黄茜茜
468	C05疼痛科	2021-03-01	2021-03-07	3075374	夏金美	女	86Y	骨质疏松伴病理性骨折	高血压病	好转	许峰	许峰	何伶俐
469	C05疼痛科	2021-03-03	2021-03-10	3076375	郑千里	男	79Y	髂骨骨折		治愈	许峰	许峰	何伶俐
470	C05疼痛科	2021-03-01	2021-03-10	3076430	张春红	女	75Y	腰椎间盘突出	腰椎退行性病变;腰椎椎管狭窄;胸椎骨折;高血压病	治愈	许峰	许峰	何伶俐	腰椎间盘造影;椎间盘射频消融术;神经根管松解术;椎间盘镜下后入路腰椎间盘切除术
471	C05疼痛科	2021-03-06	2021-03-11	3076786	林美叶	女	74Y	骨质疏松伴病理性骨折	盲，单眼;腰椎骨折;贫血;颈椎间盘突出	好转	占恭豪	占恭豪	黄茜茜
472	C05疼痛科	2021-03-04	2021-03-13	3077547	王爱嫦	女	33Y	股骨颈骨折		治愈	翁益民	翁益民	柯陈荣	股骨骨折闭合复位螺钉内固定术
473	C05疼痛科	2021-03-03	2021-03-15	3078053	陈国芬	女	67Y	类风湿性关节炎	骨质疏松伴病理性骨折;膝关节病	好转	占恭豪	占恭豪	黄茜茜
474	C05疼痛科	2021-03-07	2021-03-17	3078856	张清莲	女	82Y	带状疱疹累及特指神经系统	骨质疏松伴病理性骨折;高血压病;糖尿病	好转	许峰	许峰	何伶俐
475	C05疼痛科	2021-03-13	2021-03-20	3079866	卢美华	女	73Y	骨质疏松伴病理性骨折	脊柱骨折;高血压病	好转	占恭豪	占恭豪	田心毅
476	C05疼痛科	2021-03-14	2021-03-23	3080957	郑小锋	女	41Y	腰椎骨折		好转	许峰	许峰	何伶俐
477	C05疼痛科	2021-03-21	2021-03-27	3081854	刘丽珍	女	71Y	骨质疏松伴病理性骨折	胸椎骨折;腰椎骨折	好转	占恭豪	占恭豪	黄茜茜
478	C05疼痛科	2021-03-16	2021-03-27	3081857	杨黄善	男	73Y	腰椎间盘突出	胸椎骨折	好转	占恭豪	占恭豪	黄茜茜	椎间盘射频消融术;腰椎间盘造影;神经根管松解术;腰椎间盘髓核切除术
479	C05疼痛科	2021-03-17	2021-03-30	3083149	程高元	男	82Y	腰椎椎管狭窄	腰椎间盘突出;非毒性多结节性甲状腺肿;膝关节炎;高血压病;腰椎骨折;下肢静脉血栓形成	好转	许峰	许峰	何伶俐
480	C05疼痛科	2021-03-27	2021-04-03	3084605	周崇英	女	83Y	骨质疏松伴病理性骨折	脊柱骨折;2型糖尿病;高血压病	好转	占恭豪	占恭豪	黄茜茜
481	C05疼痛科	2021-03-24	2021-04-07	3085633	章爱弟	女	89Y	骨质疏松伴病理性骨折	胸椎骨折;肋骨骨折;胆囊结石伴慢性胆囊炎;高血压病	治愈	许峰	许峰	何伶俐	周围神经麻醉止痛
482	C05疼痛科	2021-04-02	2021-04-08	3085964	吴彩凤	女	56Y	髌骨骨折	2型糖尿病;高血压病	好转	王振文	王振文	蔡乐益	髌骨骨折切开复位术
483	C05疼痛科	2021-04-10	2021-04-12	3087205	包银梅	女	53Y	骨质疏松伴病理性骨折	高血压病	好转	许峰	许峰	何伶俐
484	C05疼痛科	2021-04-08	2021-04-17	3088815	叶秋雨	女	67Y	腰椎骨折	腰椎退行性病变;高血压病;2型糖尿病	治愈	占恭豪	申帮利	申帮利
485	C05疼痛科	2021-04-15	2021-04-22	3090826	金衍森	男	66Y	锁骨骨折	后天性肾囊肿;特指手术后状态;肝囊肿	好转	石成弟	石成弟	项光恒	锁骨骨折切开复位术
486	C05疼痛科	2021-04-10	2021-04-24	3091406	汪玉昌	男	88Y	骨质疏松	脊柱骨折	好转	占恭豪	占恭豪	黄茜茜
487	C05疼痛科	2021-04-21	2021-04-25	3091939	周少竹	女	43Y	手术后恶性肿瘤化学治疗	乳房肿物;慢性乙型病毒性肝炎;腋下淋巴结继发恶性肿瘤;乳腺恶性肿瘤;胸壁继发恶性肿瘤;肋骨骨折	好转	吴剑	吴剑	林瑞芳
488	C05疼痛科	2021-04-25	2021-04-29	3093374	周秀云	女	68Y	骨质疏松伴病理性骨折	膝关节病	好转	许峰	许峰	何伶俐
489	C05疼痛科	2021-04-27	2021-05-02	3094028	陈茶英	女	78Y	骨质疏松伴病理性骨折	脊柱骨折	好转	占恭豪	占恭豪	黄茜茜
490	C05疼痛科	2021-04-24	2021-05-03	3094578	杨小甫	男	77Y	腰椎间盘突出	骨折治疗后恢复期;高血压病	好转	占恭豪	占恭豪	黄茜茜	椎管造影;连续硬膜外阻滞术
491	C05疼痛科	2021-05-05	2021-05-13	3097900	严早	女	61Y	骨质疏松伴病理性骨折	颈椎关节强硬;高血压病	好转	许峰	许峰	何伶俐
492	C05疼痛科	2021-05-08	2021-05-15	3098235	刘齐平	男	67Y	骨质疏松	脊柱骨折;肺结节;前列腺增生;中耳和乳突疾患	好转	占恭豪	占恭豪	黄茜茜
493	C05疼痛科	2021-05-08	2021-05-15	3098239	陈碎钗	女	61Y	三叉神经痛	骨折治疗后恢复期	好转	占恭豪	占恭豪	黄茜茜	周围神经破坏术;三叉神经射频消融术
494	C05疼痛科	2021-05-11	2021-05-16	3098896	胡秀珍	女	81Y	骨质疏松伴病理性骨折	高血压病;痛风	好转	许峰	许峰	何伶俐
495	C05疼痛科	2021-05-12	2021-05-23	3101168	苏梅玉	女	86Y	颈椎关节强硬	骨质疏松伴病理性骨折;肺炎	好转	许峰	许峰	何伶俐
496	C05疼痛科	2021-05-15	2021-05-24	3101541	娄秀兰	女	80Y	废用性骨质疏松伴病理性骨折	高血压病;糖尿病;类风湿性关节炎	好转	占恭豪	占恭豪	黄茜茜
497	C05疼痛科	2021-05-15	2021-05-26	3102299	林淑媚	女	78Y	骨质疏松伴病理性骨折	慢性胃炎;多发性肝囊肿	好转	许峰	许峰	何伶俐
498	C05疼痛科	2021-05-24	2021-05-29	3103259	章碎奶	女	81Y	骨质疏松	腰椎间盘突出;腰椎骨折;高血压病	治愈	占恭豪	申帮利	申帮利
499	C05疼痛科	2021-05-25	2021-06-01	3104160	王秀英	女	83Y	骨质疏松	高血压病;脊柱骨折	好转	占恭豪	占恭豪	黄茜茜
500	C05疼痛科	2021-05-31	2021-06-08	3106375	夏林香	女	78Y	骨质疏松伴病理性骨折	腰椎间盘突出;帕金森病;胸椎骨折	治愈	占恭豪	申帮利	申帮利
501	C05疼痛科	2021-06-18	2021-06-26	3112317	陈大福	男	45Y	锁骨骨折	肌腱和肌肉损伤;脂肪肝;肝囊肿;前列腺结石	治愈	余可和	余可和	卢晓郎	锁骨骨折切开复位术
502	C05疼痛科	2021-05-02	2021-06-27	3112732	刘际轮	男	62Y	神经痛	肩胛骨骨折;肋骨骨折;神经源性肠;神经源性膀胱;四肢瘫痪;脊髓损伤;特指手术后状态	好转	许峰	许峰	何伶俐	脊髓电刺激器置入术
503	C05疼痛科	2021-06-27	2021-07-04	3115254	李建宗	男	49Y	取除骨折内固定装置	肘关节僵硬;尺神经炎;粘连性肩关节囊炎	其他	王振文	水小龙	水小龙	肩关节松解术;肘关节松解术;尺骨内固定物取出术
504	C05疼痛科	2021-07-03	2021-07-05	3115673	陈佩兰	女	76Y	骨质疏松伴病理性骨折	高血压病;胸椎退行性病变;冠状动脉粥样硬化性心脏病	好转	许峰	许峰	何伶俐
505	C05疼痛科	2021-07-01	2021-07-07	3116351	伍煜	女	85Y	骨质疏松	高血压病;脊柱骨折;慢性肾衰竭;冠状动脉粥样硬化性心脏病	好转	占恭豪	占恭豪	黄茜茜
506	C05疼痛科	2021-07-06	2021-07-08	3116777	李茂发	男	84Y	骨质疏松	腰椎骨折	好转	占恭豪	王佩芳	黄茜茜
507	C05疼痛科	2021-07-08	2021-07-10	3117303	何彬斌	男	15Y	锁骨骨折		好转	石成弟	石成弟	蔡乐益
508	C05疼痛科	2021-07-06	2021-07-11	3117947	李领花	女	88Y	骨质疏松伴病理性骨折	脊柱骨折;人工髋关节;高血压病;特指手术后状态	好转	占恭豪	占恭豪	黄茜茜
509	C05疼痛科	2021-07-11	2021-07-18	3120303	余娒奶	女	77Y	骨质疏松	腰椎间盘突出;腰椎骨折	好转	许峰	占恭豪	黄茜茜
510	C05疼痛科	2021-07-12	2021-07-24	3122358	楼东琴	女	83Y	骨质疏松伴病理性骨折	脊柱骨折;肾功能异常;冠状动脉粥样硬化性心脏病;病窦综合征;心房颤动	好转	占恭豪	黄茜茜	黄茜茜
511	C05疼痛科	2021-07-13	2021-07-24	3122625	戴秀环	女	71Y	腰肌劳损	脊柱骨折;高血压病	好转	占恭豪	占恭豪	黄茜茜
512	C05疼痛科	2021-07-11	2021-07-25	3122830	林珠娥	女	64Y	腰椎椎管狭窄	肝囊肿;肋骨骨折;2型糖尿病	治愈	许峰	许峰	何伶俐	椎间盘射频消融术;腰椎间盘造影;神经根管松解术;腰椎间盘髓核切除术
513	C05疼痛科	2021-06-19	2021-07-29	3124602	何胜利	男	40Y	恶性肿瘤维持性化学治疗	骨继发恶性肿瘤;肺部感染;腹水;病理性骨折;鼻咽恶性肿瘤;高脂血症;胸腔积液;肝继发恶性肿瘤	好转	吴剑	吴剑	林瑞芳
514	C05疼痛科	2021-07-24	2021-07-31	3124835	沈娇兰	女	63Y	骨质疏松	特指手术后状态;腰椎骨折	好转	占恭豪	占恭豪	黄茜茜
515	C05疼痛科	2021-07-27	2021-07-31	3124846	傅小花	女	76Y	骨质疏松伴病理性骨折	2型糖尿病;高血压病	好转	占恭豪	占恭豪	黄茜茜
516	C05疼痛科	2021-07-29	2021-07-31	3124989	傅广腾	男	5Y	肱骨髁上骨折		治愈	张敬东	李玉安	王伟	肱骨骨折闭合复位术
517	C05疼痛科	2021-07-31	2021-08-01	3125544	唐爱珍	女	49Y	桡骨下端骨折		好转	石成弟	石成弟	蔡乐益
518	C05疼痛科	2021-07-18	2021-08-04	3126665	黄华宽	男	56Y	开放性胫腓骨下端骨折	高血压病;2型糖尿病	好转	翁益民	翁益民	柯陈荣	皮肤和皮下组织血肿抽吸术;胫骨骨折切开复位术
519	C05疼痛科	2021-07-24	2021-08-07	3127311	张永德	男	81Y	骨质疏松伴病理性骨折	高血压病;腰椎骨折;2型糖尿病	好转	占恭豪	占恭豪	黄茜茜
520	C05疼痛科	2021-07-27	2021-08-10	3128554	张宝妹	女	84Y	骨质疏松伴病理性骨折	腰椎骨折	好转	占恭豪	占恭豪	黄茜茜	周围神经破坏术
521	C05疼痛科	2021-08-03	2021-08-11	3128989	江阿招	女	69Y	骨质疏松伴病理性骨折	胸椎骨折;类风湿性关节炎;高血压病	好转	占恭豪	占恭豪	黄茜茜
522	C05疼痛科	2021-08-07	2021-08-11	3129028	包浩晨	男	15Y	取除骨折内固定装置		其他	余可和	余可和	卢晓郎	骨盆内固定物取出术
523	C05疼痛科	2021-07-27	2021-08-14	3129905	王引弟	女	87Y	骨质疏松伴病理性骨折	腰椎骨折;老年性心脏病	好转	占恭豪	占恭豪	黄茜茜
524	C05疼痛科	2021-07-31	2021-08-14	3129909	王银红	女	81Y	骨质疏松伴病理性骨折	高血压病;创伤性脊椎病;脊柱骨折	好转	占恭豪	占恭豪	黄茜茜
525	C05疼痛科	2021-08-14	2021-08-21	3132477	徐月英	女	76Y	骨质疏松	脊柱骨折	好转	占恭豪	占恭豪	黄茜茜
526	C05疼痛科	2021-08-16	2021-08-21	3132526	胡佳乐	女	12Y	取除骨折内固定装置		其他	翁益民	翁益民	柯陈荣	踝关节内固定物取出术
527	C05疼痛科	2021-08-15	2021-08-24	3133734	诸葛玲凤	女	81Y	骨质疏松伴病理性骨折	高血压病	好转	占恭豪	占恭豪	黄茜茜
528	C05疼痛科	2021-08-21	2021-08-25	3134122	叶永府	男	57Y	尾骨骨折	高血压病;2型糖尿病	好转	占恭豪	占恭豪	黄茜茜
529	C05疼痛科	2021-08-21	2021-08-25	3134157	张兰花	女	68Y	骨质疏松伴病理性骨折	特指手术后状态	好转	占恭豪	占恭豪	黄茜茜
530	C05疼痛科	2021-08-21	2021-08-28	3134961	陈冬连	女	70Y	腰椎间盘突出	骨质疏松伴病理性骨折;肋骨骨折;高血压病	好转	许峰	许峰	田心毅
531	C05疼痛科	2021-08-21	2021-08-30	3135732	董微妹	女	60Y	胸椎骨折	腰椎骨折;肌腱和肌肉损伤	好转	占恭豪	占恭豪	黄茜茜
532	C05疼痛科	2021-08-21	2021-08-31	3136197	郑合梅	女	68Y	肩周炎	骨质疏松伴病理性骨折	好转	占恭豪	占恭豪	黄茜茜	按摩手法治疗
533	C05疼痛科	2021-08-28	2021-09-04	3137337	王燕燕	女	84Y	骨质疏松	脊柱骨折;手术后恢复期;2型糖尿病;高血压病	好转	占恭豪	占恭豪	黄茜茜	周围神经破坏术
534	C05疼痛科	2021-08-30	2021-09-04	3137348	黄莲香	女	86Y	骨质疏松伴病理性骨折	心功能不全;心房颤动	治愈	占恭豪	申帮利	申帮利
535	C05疼痛科	2021-08-22	2021-09-04	3137396	陈臣妹	女	72Y	胆囊结石	骨质疏松;肺部感染;后天性肾囊肿;腰椎退行性病变;胸椎骨折	好转	吴伟军	邓应彬	金灿
536	C05疼痛科	2021-08-21	2021-09-04	3137438	金慎力	男	79Y	骨质疏松伴病理性骨折		好转	占恭豪	占恭豪	黄茜茜
537	C05疼痛科	2021-08-28	2021-09-10	3139541	赖连清	男	54Y	多发性骨髓瘤	腰椎骨折;脊柱骨折	好转	占恭豪	占恭豪	王佩芳
538	C05疼痛科	2021-09-04	2021-09-11	3139657	项珠娒	女	68Y	骨质疏松伴病理性骨折		好转	占恭豪	占恭豪	王佩芳
539	C05疼痛科	2021-09-01	2021-09-12	3140249	汪克素	女	66Y	腰椎间盘突出	神经痛;腰椎骨折	治愈	许峰	许峰	何伶俐	椎间盘射频消融术;腰椎间盘造影;神经根管松解术;腰椎间盘髓核切除术
540	C05疼痛科	2021-09-04	2021-09-12	3140254	林海船	男	78Y	骨质疏松	后天性肾囊肿;前列腺结石;脊柱骨折;帕金森综合征	好转	占恭豪	占恭豪	王佩芳
541	C05疼痛科	2021-09-04	2021-09-14	3140935	邵爱月	女	74Y	骨质疏松伴病理性骨折	肝恶性肿瘤个人史;胸椎骨折	好转	占恭豪	占恭豪	王佩芳
542	C05疼痛科	2021-09-12	2021-09-18	3142166	叶文文	女	74Y	骨质疏松伴病理性骨折		好转	占恭豪	占恭豪	黄茜茜
543	C05疼痛科	2021-09-14	2021-09-21	3143380	王国松	男	74Y	骨质疏松伴病理性骨折		好转	占恭豪	占恭豪	黄茜茜
544	C05疼痛科	2021-09-14	2021-09-25	3144589	谢笃南	男	60Y	颈椎关节强硬	眼球破裂;损伤后遗症;鼻骨骨折;高血压病;心动过缓	好转	许峰	许峰	何伶俐
545	C05疼痛科	2021-09-18	2021-09-25	3144594	朱渡忠	男	79Y	骨质疏松伴病理性骨折	2型糖尿病;高血压病	好转	占恭豪	占恭豪	黄茜茜
546	C05疼痛科	2021-09-18	2021-09-25	3144768	金竹湘	女	88Y	腰肌劳损	骨质疏松;腰椎骨折	好转	占恭豪	占恭豪	黄茜茜
547	C05疼痛科	2021-09-20	2021-09-25	3144797	蒋海平	男	59Y	取除骨折内固定装置	脂肪肝;肝囊肿;后天性肾囊肿;前列腺增生	其他	翁益民	翁益民	柯陈荣	跟骨内固定物取出术
548	C05疼痛科	2021-09-19	2021-09-28	3145756	金来香	女	81Y	骨质疏松	创伤性脊椎病;脊柱骨折	好转	许峰	许峰	何伶俐
549	C05疼痛科	2021-09-25	2021-09-30	3146551	严春花	女	70Y	骨质疏松	病理性骨折;帕金森病	好转	占恭豪	占恭豪	王佩芳
550	C05疼痛科	2021-09-25	2021-09-30	3146556	孙福兰	女	77Y	骨质疏松伴病理性骨折	膝关节炎;手术后随诊检查;高血压病	好转	占恭豪	占恭豪	黄茜茜
551	C05疼痛科	2021-10-10	2021-10-12	3149793	王玉香	女	69Y	骨质疏松伴病理性骨折	高血压病;Ⅰ度房室传导阻滞	好转	许峰	许峰	何伶俐
552	C05疼痛科	2021-10-10	2021-10-16	3151240	孔繁友	男	54Y	取除骨折内固定装置		其他	孔建中	胡炜	陈墨川	跖骨内固定物取出术
553	C05疼痛科	2021-10-13	2021-10-19	3152343	王克松	男	83Y	骨质疏松	胸椎骨折;肺气肿;肺部感染	好转	许峰	许峰	何伶俐
554	C05疼痛科	2021-10-12	2021-10-20	3152740	徐碎媛	女	84Y	骨盆骨折	骨质疏松伴病理性骨折;骶骨骨折;高血压病	好转	占恭豪	占恭豪	黄茜茜
555	C05疼痛科	2021-10-13	2021-10-23	3153554	丁圣兰	女	76Y	腰椎间盘突出	骨质疏松伴病理性骨折;腰椎骨折	好转	许峰	许峰	田心毅
556	C05疼痛科	2021-10-13	2021-10-23	3153568	陈春筱	女	80Y	膝关节炎	高血压病;2型糖尿病;肺部感染;骨质疏松伴病理性骨折	好转	许峰	许峰	田心毅	周围神经破坏术
557	C05疼痛科	2021-10-19	2021-10-24	3154151	黄春晓	女	35Y	取除骨折内固定装置	后天性肾囊肿;肾结石	其他	翁益民	翁益民	柯陈荣	锁骨内固定物取出术
558	C05疼痛科	2021-10-20	2021-10-25	3154581	金友国	男	58Y	取除骨折内固定装置	高血压病;脂肪肝;胆囊结石;肾结石	其他	洪建军	余洋	余洋	肱骨内固定物取出术
559	C05疼痛科	2021-10-16	2021-10-30	3156146	杨冬钗	女	78Y	腰椎间盘突出	陈旧性腰椎骨折;脑良性肿瘤;子宫切除术后状态;高血压病;腰椎椎管狭窄	好转	许峰	许峰	何伶俐	椎间盘射频消融术;神经根管松解术;腰椎间盘髓核切除术;经外周静脉穿刺中心静脉插管术[PICC];椎管成形术;腰椎间盘造影
560	C05疼痛科	2021-10-13	2021-10-31	3156628	黄锡六	男	68Y	腰椎椎管狭窄	脊柱压缩性骨折;泌尿系结石;尿潴留;前列腺增生	好转	许峰	许峰	何伶俐	椎间盘射频消融术;腰椎间盘造影;神经根管松解术;腰椎间盘髓核切除术
561	C05疼痛科	2021-10-31	2021-11-06	3158675	蒋新媛	女	84Y	骨质疏松	高血压病;腰椎骨折	好转	许峰	许峰	何伶俐
562	C05疼痛科	2021-10-31	2021-11-07	3159095	徐葱花	女	71Y	腰椎骨折	高血压病	治愈	许峰	许峰	何伶俐
563	C05疼痛科	2021-11-02	2021-11-08	3159526	李福亮	男	74Y	骨质疏松伴病理性骨折	腰椎骨折;肩周炎	好转	占恭豪	占恭豪	黄茜茜
564	C05疼痛科	2021-11-03	2021-11-09	3160020	庄千忠	男	43Y	胫骨骨折	头部外伤	好转	黄俊武	黄俊武	王鉴顺
565	C05疼痛科	2021-10-23	2021-11-10	3160517	黄松妹	女	83Y	骨质疏松伴病理性骨折	膝关节炎;高血压病;腰椎椎管狭窄	好转	占恭豪	占恭豪	黄茜茜	连续硬膜外阻滞术;关节治疗性物质注射
566	C05疼痛科	2021-10-31	2021-11-13	3161236	郑玉玲	女	46Y	肱骨骨折	胆囊结石;肝钙化灶;胆囊胆固醇沉着症;脂肪肝	治愈	翁益民	翁益民	柯陈荣	肱骨骨折切开复位术
567	C05疼痛科	2021-11-13	2021-11-15	3162023	倪玉香	女	76Y	骨质疏松伴病理性骨折	高血压病	好转	许峰	许峰	何伶俐
568	C05疼痛科	2021-11-13	2021-11-17	3162666	吴爱妹	女	73Y	骨质疏松伴病理性骨折	特指手术后状态	好转	占恭豪	王佩芳	黄茜茜
569	C05疼痛科	2021-11-09	2021-11-17	3162671	黄红銮	女	69Y	骨质疏松	胸椎骨折;特指手术后状态	好转	占恭豪	占恭豪	黄茜茜
570	C05疼痛科	2021-11-07	2021-11-17	3162737	黄松妹	女	72Y	骨质疏松伴病理性骨折	间质性肺病	好转	许峰	许峰	何伶俐
571	C05疼痛科	2021-11-10	2021-11-20	3163567	王彩凤	女	65Y	腰椎椎管狭窄	腰椎间盘突出;肩周炎;高血压病;陈旧性踝关节骨折;胆囊切除术后状态	好转	许峰	许峰	何伶俐	腰椎间盘造影;椎间盘射频消融术;神经根管松解术;腰椎间盘髓核切除伴椎板切除术
572	C05疼痛科	2021-11-16	2021-11-20	3163682	厉兰香	女	70Y	关节炎	骨质疏松伴病理性骨折;髋关节炎;人工髋关节	好转	占恭豪	占恭豪	黄茜茜
573	C05疼痛科	2021-11-15	2021-11-21	3164103	董宏坚	男	59Y	取除骨折内固定装置	特指含硅[矽]粉尘肺尘埃沉着病;下肢动脉粥样硬化;前列腺增生;后天性肾囊肿;肾结石;脂肪肝	其他	翁益民	翁益民	柯陈荣	胫骨内固定物取出术
574	C05疼痛科	2021-11-17	2021-11-22	3164378	戴月兰	女	60Y	骨质疏松伴病理性骨折	胸椎骨折;腰椎椎管狭窄;腰椎退行性病变	好转	占恭豪	申帮利	申帮利
575	C05疼痛科	2021-11-21	2021-11-30	3167361	徐美玉	女	80Y	骨质疏松伴病理性骨折	高血压病;尿潴留;肾衰竭	好转	许峰	许峰	何伶俐
576	C05疼痛科	2021-11-27	2021-12-01	3167509	黄益妹	女	85Y	骨质疏松伴病理性骨折	高血压病	好转	占恭豪	占恭豪	黄茜茜
577	C05疼痛科	2021-11-28	2021-12-01	3167523	陈玉香	女	80Y	骨质疏松伴病理性骨折	肾衰竭;原发性甲状腺机能亢进症;贫血;特指手术后状态	好转	许峰	许峰	田心毅
578	C05疼痛科	2021-11-30	2021-12-04	3168383	方红珠	女	72Y	骨质疏松伴病理性骨折	特指手术后状态;2型糖尿病;高血压病;颈椎关节强硬	好转	占恭豪	占恭豪	黄茜茜
579	C05疼痛科	2021-11-30	2021-12-04	3168388	李阿娇	女	71Y	骨质疏松伴病理性骨折		好转	占恭豪	占恭豪	黄茜茜
580	C05疼痛科	2021-12-04	2021-12-11	3170787	胡美玲	女	68Y	骨质疏松伴病理性骨折	胸椎骨折;膝关节炎;颈椎关节强硬	好转	占恭豪	占恭豪	黄茜茜
581	C05疼痛科	2021-12-09	2021-12-12	3171260	廖本胜	男	21Y	胫骨骨折	脂肪肝	未愈	翁益民	翁益民	王特
582	C05疼痛科	2021-11-28	2021-12-12	3171274	吴竹花	女	73Y	骨质疏松伴病理性骨折	高血压病	好转	许峰	许峰	何伶俐	胸椎骨折球囊扩张成形术
583	C05疼痛科	2021-12-03	2021-12-13	3171584	胡彩飞	女	60Y	骨质疏松伴病理性骨折		好转	许峰	许峰	何伶俐	胸椎骨折球囊扩张成形术
584	C05疼痛科	2021-11-27	2021-12-15	3172344	周笑玲	女	66Y	颈椎关节强硬	胆囊结石;卵巢囊肿;骨质疏松伴病理性骨折;后天性肾囊肿	好转	占恭豪	占恭豪	黄茜茜
585	C05疼痛科	2021-12-14	2021-12-18	3173255	朱昌槐	男	85Y	骨质疏松伴病理性骨折	冠状动脉粥样硬化性心脏病;前列腺恶性肿瘤	好转	占恭豪	占恭豪	王佩芳
586	C05疼痛科	2021-12-12	2021-12-18	3173279	庄素兰	女	65Y	骨质疏松伴病理性骨折	高血压病;2型糖尿病	好转	许峰	许峰	何伶俐
587	C05疼痛科	2021-12-09	2021-12-20	3174013	颜国军	男	45Y	胫骨骨干骨折	腓骨骨折;前列腺结石	治愈	翁益民	翁益民	王特	胫骨骨折切开复位术
588	C05疼痛科	2021-11-27	2021-12-20	3174055	余昌森	男	64Y	骨继发恶性肿瘤	甲状腺结节;后天性肾囊肿;肺结节;恶性肿瘤的维持性化疗;肿瘤性病理性骨折;肾结石;肺部感染;反流性食管炎;消化性溃疡;慢性胃炎;慢性乙型病毒性肝炎	好转	陈文俊	陈文俊	吴聪聪	超声引导下胸腔穿刺术
589	C05疼痛科	2021-12-11	2021-12-21	3174342	丁克丽	女	78Y	腰椎间盘突出	骨质疏松伴病理性骨折;肛窦炎;高脂血症;冠状动脉粥样硬化	好转	占恭豪	占恭豪	黄茜茜
590	C05疼痛科	2021-12-11	2021-12-21	3174418	周广积	男	71Y	骨质疏松伴病理性骨折		治愈	占恭豪	占恭豪	黄茜茜
591	C05疼痛科	2021-12-18	2021-12-25	3175618	金晓红	女	78Y	骨质疏松伴病理性骨折	人工膝关节	好转	占恭豪	占恭豪	黄茜茜
592	C05疼痛科	2021-12-12	2021-12-25	3175645	林细凤	女	66Y	膝关节副韧带扭伤	闭合性胫骨平台骨折;膝关节十字韧带扭伤;半月板损伤;膝关节积液;股骨骨折;胫骨骨折;后天性肾囊肿;肾结石;大隐静脉曲张	治愈	翁益民	翁益民	王特	副韧带修补术
593	C05疼痛科	2021-12-25	2021-12-30	3177586	李红玉	女	80Y	骨质疏松	腰椎骨折	好转	占恭豪	占恭豪	黄茜茜
594	C06肿瘤放化疗、神经康复	2021-03-04	2021-03-13	3077423	金成华	女	65Y	手术后恶性肿瘤化学治疗	脑继发恶性肿瘤;骨继发恶性肿瘤;肺恶性肿瘤;上肢骨继发恶性肿瘤;病理性骨折	好转	吴剑	吴剑	林瑞芳
595	C06肿瘤放化疗、神经康复	2021-04-19	2021-05-19	3099960	董进花	女	71Y	脑梗死后遗症	2型糖尿病;肾积水伴肾结石;肺部感染;脓毒血症;偏瘫;由于活动能力降低而需要帮助;湿疹;药物性肝损害;念珠菌疹;颈内动脉闭塞;大脑中动脉闭塞;动脉粥样硬化;下肢静脉血栓形成;心律失常;房性早搏;腰椎退行性病变;骨折治疗后恢复期;膝关节强硬	好转	刘宝华	刘宝华	金翩翩
596	C06肿瘤放化疗、神经康复	2021-05-12	2021-06-02	3104458	郭成光	男	42Y	腰椎骨折	慢性乙型病毒性肝炎;胸椎骨折;体位性低血压;脊柱后凸;良性阵发性眩晕	好转	刘宝华	刘宝华	金翩翩
597	C06肿瘤放化疗、神经康复	2021-03-28	2021-06-05	3105186	叶连蓉	女	82Y	脑出血	偏瘫;由于活动能力降低而需要帮助;轻度认知障碍;多发性脑梗死;精神分裂症;Ⅳ期褥疮;背部肿物;胸椎骨折	好转	刘宝华	刘宝华	钟燕彪
598	C06肿瘤放化疗、神经康复	2021-05-19	2021-06-09	3107012	陈颜广	男	40Y	脊髓损伤	前列腺结石;肝功能不全;不完全截瘫;腰椎骨折;由于活动能力降低而需要帮助	好转	刘宝华	刘宝华	金翩翩
599	C06肿瘤放化疗、神经康复	2021-06-15	2021-06-26	3112423	王春飞	女	51Y	硬膜外血肿	脑挫伤;进食障碍;特定性运动功能发育障碍;蛛网膜下腔出血;特指手术后状态;肺挫伤;多发性肋骨骨折;脂肪肝;胸腔积液;腹水	好转	刘宝华	刘宝华	覃燕青
600	C06肿瘤放化疗、神经康复	2021-04-05	2021-06-29	3113489	叶碎岩	男	79Y	恶性肿瘤术后放射治疗	鼻恶性肿瘤;骨折治疗后恢复期;乳突炎;慢性鼻窦炎	好转	吴剑	吴剑	林瑞芳
601	C06肿瘤放化疗、神经康复	2021-06-22	2021-07-12	3118007	董希明	男	61Y	肺恶性肿瘤	下肢动脉粥样硬化;肝囊肿;胆囊息肉;前列腺增生;甲状腺囊肿;骨继发恶性肿瘤;恶性肿瘤术后放射治疗;脑继发恶性肿瘤;特指颈椎骨折;腔隙性脑梗死	好转	吴剑	吴剑	林瑞芳
602	C06肿瘤放化疗、神经康复	2021-07-13	2021-07-18	3120260	蔡秋芽	女	56Y	手术后恶性肿瘤化学治疗	后天性肾囊肿;脂肪肝;腰椎骨折;骨继发恶性肿瘤	好转	吴剑	吴剑	林瑞芳
603	C06肿瘤放化疗、神经康复	2021-05-17	2021-07-19	3120853	刘碎丐	男	63Y	脑梗死	下肢动脉粥样硬化;腰椎骨折;腰椎间盘突出;腰椎退行性病变;脂肪肝;言语障碍;低蛋白血症;高脂血症;泌尿道感染;高血压病;由于活动能力降低而需要帮助;偏瘫;2型糖尿病	好转	刘宝华	刘宝华	陈霜2
604	C06肿瘤放化疗、神经康复	2021-06-30	2021-07-24	3122553	陈王菊	女	93Y	脑梗死	脑动脉狭窄;动脉粥样硬化;急性冠脉综合征;心律失常;房性早搏;阵发性房性心动过速;室性早搏;痴呆;低蛋白血症;肱骨外科颈骨折;单纯性肾囊肿;肝囊肿;肺气肿;偏瘫;由于活动能力降低而需要帮助;进食障碍;多发性脑梗死;心功能不全	好转	刘宝华	刘宝华	商萍
605	C06肿瘤放化疗、神经康复	2021-08-04	2021-08-10	3128483	叶碎岩	男	80Y	恶性肿瘤术后放射治疗	陈旧性颅骨骨折;肾结石;鼻咽恶性肿瘤;慢性鼻窦炎;乳突炎	好转	吴剑	吴剑	林瑞芳
606	C06肿瘤放化疗、神经康复	2021-05-20	2021-08-11	3128863	林津津	女	72Y	视神经脊髓炎	多发性肋骨骨折;特定性运动功能发育障碍;泌尿道感染;视神经脊髓炎;神经源性膀胱;多发性脑梗死;动脉粥样硬化;颈椎间盘突出;脊柱侧弯;胸椎骨折;骨质疏松;高血压病;下肢动脉粥样硬化;脂肪肝;肾结石	好转	刘宝华	刘宝华	陈霜2	经外周静脉穿刺中心静脉插管术[PICC]
607	C06肿瘤放化疗、神经康复	2021-07-19	2021-08-19	3131835	冯焕君	男	41Y	创伤性蛛网膜下腔出血	颅内损伤;多发性损伤;头皮血肿;陈旧性肋骨骨折;创伤性胸腔积液;泌尿道感染;腹水;腹部损伤;肠瘘;肺部感染;骨盆骨折	好转	刘宝华	刘宝华	217116
608	C06肿瘤放化疗、神经康复	2021-08-18	2021-08-22	3133061	董希棠	男	84Y	肺恶性肿瘤	骨折治疗后恢复期;后天性肾囊肿;脑继发恶性肿瘤;骨继发恶性肿瘤	好转	陈文俊	朱宝玲	217136
609	C06肿瘤放化疗、神经康复	2021-08-11	2021-08-23	3133316	邵正绍	男	81Y	脑梗死	偏瘫;进食障碍;由于活动能力降低而需要帮助;慢性肾衰竭;轻度贫血;肺部感染;高血压病;心功能不全;颈动脉硬化;动脉粥样硬化;下肢动脉粥样硬化;下肢静脉血栓形成;静脉石;胸椎骨折;腰椎骨折;肋骨骨折;肺挫伤;冠状动脉支架植入后状态;肾结石	好转	刘宝华	刘宝华	217115	深静脉穿刺;经外周静脉穿刺中心静脉插管术[PICC]
610	C06肿瘤放化疗、神经康复	2021-08-30	2021-09-04	3137288	董希明	男	61Y	肺恶性肿瘤	肝功能异常;脑继发恶性肿瘤;骨继发恶性肿瘤;椎管狭窄;特指颈椎骨折;腔隙性脑梗死;下肢动脉粥样硬化;肝囊肿;胆囊息肉;前列腺增生;甲状腺囊肿	好转	吴剑	吴剑	林瑞芳
611	C06肿瘤放化疗、神经康复	2021-07-26	2021-09-08	3138863	杨月红	女	85Y	特指癫痫	下肢动脉粥样硬化;胸腔积液;泌尿道感染;主动脉钙化;颈动脉硬化;锁骨下动脉粥样硬化;肝功能异常;痴呆;肋骨骨折;高血压病;呼吸衰竭;肺部感染;脑梗死后遗症;癫痫持续状态;低蛋白血症;低钾血症	好转	刘宝华	刘宝华	黄世园
612	C06肿瘤放化疗、神经康复	2021-09-16	2021-09-20	3143124	蔡秋芽	女	56Y	为肿瘤化学治疗疗程	恶性肿瘤术后放射治疗;骨继发恶性肿瘤;腰椎骨折;脂肪肝;后天性肾囊肿	好转	吴剑	吴剑	黄选章
613	C06肿瘤放化疗、神经康复	2021-09-20	2021-10-09	3148792	陈月华	女	65Y	恶性肿瘤的维持性化疗	肺恶性肿瘤;骨折治疗后恢复期	好转	吴剑	吴剑	黄选章
614	C06肿瘤放化疗、神经康复	2021-09-27	2021-10-19	3152422	瞿培	男	40Y	多发性损伤	蛛网膜下腔出血;脂肪肝;硬膜外血肿;硬脑膜下积液;特定性运动功能发育障碍;高血压病;肺挫伤;肺不张;胸腔积液;肾上腺出血;腰椎骨折;肋骨骨折;肌腱和肌肉损伤;脾损伤;肝囊肿;颅内损伤	好转	刘宝华	刘宝华	黄世园
615	C06肿瘤放化疗、神经康复	2021-10-17	2021-10-21	3153004	陈月华	女	65Y	恶性肿瘤的维持性化疗	骨折治疗后恢复期;肺恶性肿瘤	好转	吴剑	吴剑	林瑞芳
616	C06肿瘤放化疗、神经康复	2021-09-08	2021-10-24	3154268	陈光梓	男	83Y	股骨粗隆间骨折	消化不良;胃肠炎;痴呆;低钾血症;2型糖尿病;高血压病;帕金森综合征;冠状动脉粥样硬化性心脏病	好转	刘宝华	刘宝华	黄世园
617	C06肿瘤放化疗、神经康复	2021-09-18	2021-11-06	3158932	郑爱鹤	女	77Y	脑血管病后遗症	完全性右束支传导阻滞;室性心动过速;高脂血症;股骨骨折;睡眠障碍;骨质疏松;胆囊结石;甲状腺结节;肺肿物;麻痹[瘫痪]综合征;特定性运动功能发育障碍;言语障碍;吞咽困难;脑出血后遗症;高血压病;2型糖尿病;2型糖尿病性肾病;慢性肾衰竭	好转	刘宝华	刘宝华	吕德钊
618	C06肿瘤放化疗、神经康复	2021-10-13	2021-11-07	3159208	卢汝富	男	71Y	脑出血	慢性支气管炎;下肢特指深部脉管静脉炎和血栓性静脉炎;偏瘫;进食障碍;肱骨骨折;言语障碍;高血压病;泌尿道感染;下肢动脉粥样硬化	好转	刘宝华	刘宝华	胡晓晓	股静脉穿刺术;下腔静脉滤器置入术
619	C06肿瘤放化疗、神经康复	2021-11-08	2021-11-10	3160227	陈月华	女	65Y	恶性肿瘤的维持性化疗	肺恶性肿瘤;骨折治疗后随诊检查	好转	吴剑	黄选章	黄选章
620	C06肿瘤放化疗、神经康复	2021-11-02	2021-11-21	3164198	宋承先	男	94Y	股骨粗隆间骨折	高血压病;慢性肾衰竭;高钾血症;轻度贫血;动脉粥样硬化;前列腺结石;心力衰竭;代谢性酸中毒;胆囊结石;后天性肾囊肿;下肢动脉粥样硬化	好转	刘宝华	刘宝华	吕德钊	股骨骨折闭合复位术
621	C06肿瘤放化疗、神经康复	2021-10-09	2021-11-23	3164793	吕俊山	男	65Y	脑挫伤	老年性脑萎缩;肋骨骨折;由于活动能力降低而需要帮助;进食障碍;硬脑膜下积液;颅内损伤;颅内出血;低钠血症;肺部感染	好转	刘宝华	刘宝华	吕德钊
622	C06肿瘤放化疗、神经康复	2021-11-01	2021-11-23	3164803	刘代飞	男	44Y	骶骨骨折	耻骨骨折;颧骨骨折;腰椎骨折;肝功能异常;由于活动能力降低而需要帮助;贫血;特指手术后状态	好转	刘宝华	刘宝华	黄世园
623	C06肿瘤放化疗、神经康复	2021-10-27	2021-11-23	3164861	王聪棉	男	46Y	胫骨骨折	肾结石;腓骨骨折;胆囊息肉;由于活动能力降低而需要帮助;脂肪肝;运动障碍	好转	刘宝华	刘宝华	金翩翩
624	C06肿瘤放化疗、神经康复	2021-11-06	2021-11-25	3165406	戴本存	男	40Y	踝骨闭合性骨折	脂肪肝;前列腺结石	好转	刘宝华	刘宝华	吕德钊	关节软骨修复术;踝关节镜下踝关节融合术;踝关节骨折切开复位术
625	C06肿瘤放化疗、神经康复	2021-10-18	2021-11-28	3166328	汤丽萍	女	84Y	肺部感染	腔隙性脑梗死;下肢动脉粥样硬化;2型糖尿病;低蛋白血症;冠状动脉粥样硬化性心脏病;高血压性心脏病;心室壁瘤;心律失常;房性早搏;心力衰竭;原发性肺动脉高压;主动脉钙化;胆囊结石;泌尿道感染;胸腔积液;胸膜钙化;肋骨骨折;精神障碍	好转	刘宝华	刘宝华	黄世园
626	C06肿瘤放化疗、神经康复	2021-10-24	2021-11-30	3167225	陈光梓	男	84Y	痴呆	冠状动脉粥样硬化性心脏病;高血压病;2型糖尿病;甲状腺肿瘤;低钾血症;股骨粗隆间骨折;主动脉钙化;髋关节病;多发性脑梗死;中枢神经系统脱髓鞘病;下肢动脉粥样硬化	好转	刘宝华	刘宝华	胡晓晓
627	C06肿瘤放化疗、神经康复	2021-11-30	2021-11-30	3167386	陈月华	女	65Y	恶性肿瘤的维持性化疗	股骨骨折;肺恶性肿瘤;肺继发恶性肿瘤	好转	吴剑	吴剑	黄选章
628	C06肿瘤放化疗、神经康复	2021-12-04	2021-12-04	3168677	蔡秋芽	女	56Y	恶性肿瘤的维持性化疗	骨继发恶性肿瘤;骨折治疗后恢复期;乳腺恶性肿瘤;后天性肾囊肿;脂肪肝	好转	吴剑	吴剑	黄选章
629	C06肿瘤放化疗、神经康复	2021-12-08	2021-12-10	3170603	季岩蕊	女	93Y	骨继发恶性肿瘤	肺部感染;肾衰竭;陈旧性髋臼骨折;高血压病;老年性骨质疏松;慢性支气管炎;耻骨骨折	未愈	吴剑	吴剑	林瑞芳
630	C06肿瘤放化疗、神经康复	2021-12-12	2021-12-20	3173926	董进花	女	71Y	多发性脑梗死	言语障碍;吞咽困难;偏瘫;动脉粥样硬化;颈内动脉闭塞;大脑中动脉闭塞;大脑中动脉狭窄;颈内动脉狭窄;胫前动脉狭窄;锁骨下动脉粥样硬化;下肢静脉炎和血栓性静脉炎;高血压病;2型糖尿病性周围神经病;房性早搏;腰椎退行性病变;陈旧性尺桡骨骨折	好转	刘宝华	刘宝华	吕德钊
631	C06肿瘤放化疗、神经康复	2021-12-21	2021-12-21	3174588	陈月华	女	65Y	恶性肿瘤的维持性化疗	肺恶性肿瘤;股骨骨折	好转	吴剑	吴剑	黄选章
632	C06肿瘤放化疗、神经康复	2021-11-06	2021-12-28	3176915	郑爱鹤	女	77Y	脑梗死后遗症	脑出血后遗症;高血压病;2型糖尿病性肾病;慢性肾衰竭;轻度贫血;肺部感染;泌尿道感染;心力衰竭;心律失常;阵发性房性心动过速;室性心动过速;完全性右束支传导阻滞;动脉粥样硬化;高脂血症;股骨骨折;睡眠障碍;骨质疏松;胆囊结石;甲状腺结节	好转	刘宝华	刘宝华	吕德钊
633	C07泌尿	2020-12-05	2021-01-13	3058019	牟加福	男	76Y	前列腺增生	特指手术后状态;下腔静脉滤器血栓形成;骨折治疗后恢复期	治愈	竺海波	饶大庞	王怡君	经尿道前列腺气化电切术[TEVAP手术]
634	C07泌尿	2021-02-10	2021-02-13	3067870	杨小岗	男	42Y	创伤性尿道断裂	骨折治疗后恢复期;手术后恢复期	好转	竺海波	饶大庞	王怡君
635	C07泌尿	2021-01-19	2021-02-17	3069339	姜豹霖	男	63Y	肾挫伤	气胸;头皮挫伤;肺挫伤;肋骨骨折	治愈	陈映鹤	杨森	杨森
636	C07泌尿	2021-02-25	2021-02-26	3072390	方桃梅	女	66Y	肩关节脱位	肱骨上端骨折	治愈	余可和	余可和	应晓洲	肩关节脱位闭合复位术
637	C07泌尿	2021-03-01	2021-03-11	3076877	陈鸣魁	男	89Y	前列腺增生	药物性低血糖;2型糖尿病;急性胃肠炎;慢性肾衰竭;特指肾盂积水;陈旧性肺结核;肺大泡;心脏起搏器调整和管理;骨折治疗后恢复期	好转	竺海波	虞海峰	饶大庞
638	C07泌尿	2021-03-06	2021-03-13	3077195	林秋生	女	40Y	输尿管结石	盆腔积液，女性;子宫手术瘢痕产妇医疗;取除骨折内固定装置;胆囊息肉	治愈	竺海波	竺海波	王怡君	经尿道输尿管镜激光碎石取石术(肾盂\输尿管)
639	C07泌尿	2021-04-02	2021-04-11	3086985	黄爱弟	女	74Y	跖骨骨折	高血压病;特指手术后状态;胆囊结石	治愈	余可和	余可和	卢晓郎	跖骨骨折切开复位术
640	C07泌尿	2021-05-02	2021-05-08	3095979	陈定龙	男	61Y	创伤性尿道断裂	手术后恢复期;高血压病;骨折治疗后恢复期;泌尿道感染	好转	陈映鹤	陈映鹤	陈映鹤	膀胱镜检查
641	C07泌尿	2021-05-14	2021-05-19	3099750	邵存兰	女	60Y	肾积水伴肾输尿管结石	高血压病;2型糖尿病;胆囊切除术后状态;骨折治疗后恢复期	治愈	何有华	余凯远	木海琦	经尿道输尿管镜激光碎石取石术(肾盂\输尿管)
642	C07泌尿	2021-05-09	2021-05-22	3100714	胡伟生	男	70Y	膀胱结石	肾结石;股骨颈骨折;痔	未愈	竺海波	饶大庞	虞海峰	全髋关节置换术
643	C07泌尿	2021-05-23	2021-05-29	3103240	胡先银	男	54Y	肾积水伴输尿管结石	肾结石;后天性肾囊肿;膀胱结石;骨折治疗后恢复期;高血压病;糖尿病	治愈	竺海波	饶大庞	虞海峰
644	C07泌尿	2021-05-17	2021-06-06	3105972	韩珠花	女	83Y	肾积水伴肾输尿管结石	泌尿道感染;菌血症;骨质疏松伴病理性骨折;高血压病	治愈	陈映鹤	陈映鹤	陈映鹤	经尿道输尿管镜激光碎石取石术(肾盂\输尿管);经皮肾镜取石术
645	C07泌尿	2021-05-29	2021-06-07	3106128	陈定龙	男	61Y	创伤性尿道断裂	膀胱造口状态;泌尿道感染;高血压病;骨折治疗后恢复期	治愈	陈映鹤	陈映鹤	陈映鹤	尿道吻合术
646	C07泌尿	2021-06-19	2021-07-03	3114683	鲍雪琴	女	60Y	肾积水伴输尿管结石	胸椎骨折;泌尿道感染	治愈	竺海波	虞海峰	虞海峰	经尿道输尿管镜激光碎石取石术(肾盂\输尿管)
647	C07泌尿	2021-06-28	2021-07-15	3119313	汤永财	男	16Y	阴囊挫伤	睾丸挫伤;耻骨骨折;男性生殖器血管疾病	治愈	张磊	张磊	王怡君	精索-附睾裂伤缝合术;阴囊切开探查术
648	C07泌尿	2021-07-13	2021-07-21	3121474	金玲玲	女	45Y	泌尿道感染	特指肾盂积水;膀胱造口状态;关节固定术后状态;骨折内固定术后疼痛;精神分裂症	好转	竺海波	虞海峰	虞海峰
649	C07泌尿	2021-08-05	2021-08-09	3128214	姜其明	男	79Y	输尿管结石	输尿管积水;肾结石;后天性肾囊肿;高血压病;假体装置安装和调整;陈旧性肋骨骨折;特指手术后状态	治愈	竺海波	竺海波	饶大庞	输尿管支架取出术
650	C07泌尿	2021-11-09	2021-11-24	3164954	汤龙洪	男	53Y	肾挫伤	头皮挫伤;多发性肋骨骨折	治愈	陈映鹤	陈映鹤	陈映鹤
651	C07泌尿	2021-12-08	2021-12-18	3173165	黄存和	男	32Y	肾结石	尺骨桡骨闭合性骨折;肋骨骨折	治愈	陈映鹤	杨森	杨森	经皮肾镜取石术
652	C08肛肠科	2021-01-04	2021-01-05	3055744	詹仕波	男	79Y	前列腺增生	腰椎骨折;腰椎间盘突出;肾结石	好转	陈映鹤	陈映鹤	陈映鹤
653	C08肛肠科	2021-04-05	2021-04-11	3086953	姜飞	男	14Y	尺骨桡骨远端骨折		治愈	陈龙	陈龙	应晓洲	尺骨骨折切开复位钢针内固定术
654	C08肛肠科	2021-04-10	2021-04-18	3089241	吴兰芬	女	53Y	髌骨骨折	后天性肾囊肿	治愈	余可和	余可和	卢晓郎	髌骨骨折切开复位术
655	C08肛肠科	2021-05-04	2021-07-10	3117390	潘学利	男	37Y	高位肛瘘	褥疮;骨质增生;脊柱骨折后遗症;膀胱炎;前列腺钙化灶	治愈	陈邦飞	金纯	黄冬冬	肛瘘挂线疗法;皮肤和皮下组织非切除性清创;中厚皮片移植术;骶尾部病损切除术
656	C08肛肠科	2021-12-13	2021-12-27	3176233	洪玲玲	女	72Y	输尿管结石伴肾结石	后天性肾囊肿;脓毒血症;泌尿道感染;糖尿病;高血压病;桡骨下端骨折;特指肾盂积水	治愈	何有华	余凯远	王帅彬	经皮肾镜取石术
657	C09肛肠科	2020-12-19	2021-01-09	3056627	叶海俊	男	39Y	肛瘘	跟骨骨折;包绕性睾丸鞘膜积液;脂肪肝;胸腔积液	治愈	胡万乐	胡万乐	胡万乐	肛瘘切除术;跟骨内固定物取出术
658	C09肛肠科	2021-01-10	2021-01-16	3059312	秦启会	女	40Y	特指趾骨骨折		好转	孔建中	孔建中	陈墨川	趾骨骨折切开复位钢针内固定术
659	C09肛肠科	2021-01-09	2021-01-20	3061049	黄丽芳	女	45Y	踝骨闭合性骨折	外踝骨折	治愈	余可和	余可和	应晓洲	踝关节骨折切开复位钢板内固定术
660	C09肛肠科	2021-04-02	2021-04-12	3087282	康其超	男	38Y	股骨粗隆间骨折		治愈	余可和	余可和	卢晓郎	股骨骨折闭合复位钢针内固定术
661	C09肛肠科	2021-05-22	2021-05-25	3101888	陈进星	男	56Y	混合痔	多发性肋骨骨折;多发性结肠息肉	未愈	陈奕	陈奕	陈奕
662	C09肛肠科	2021-06-02	2021-06-07	3106022	章碎媛	女	63Y	脾损伤	心功能不全;手术后恢复期;多发性肋骨骨折;创伤性胸腔积液;肝囊肿;后天性肾囊肿;腹水;肝硬化	好转	王飞海	周磊	周磊
663	C09肛肠科	2021-06-18	2021-06-28	3113261	余小燕	女	55Y	踝骨闭合性骨折	踝关节脱位;肝囊肿	治愈	余可和	余可和	卢晓郎	踝关节修补术;踝关节骨折切开复位钢板内固定术
664	C09肛肠科	2021-07-01	2021-07-10	3117300	伍海燕	女	52Y	锁骨骨折	脑钙化;脂肪肝	治愈	余可和	余可和	卢晓郎	锁骨骨折切开复位螺钉内固定术
665	C09肛肠科	2021-07-10	2021-07-19	3120638	潘琼武	男	19Y	涉及骨折板和特指内固定装置的随诊医疗		其他	赵琦峰	吴国伟	夏杰	胸骨内固定物取出术
666	C09肛肠科	2021-09-06	2021-09-16	3141602	徐丽珍	女	36Y	锁骨骨折	肋骨骨折;2型糖尿病;脂肪肝	治愈	余可和	余可和	陈鹏博	锁骨骨折切开复位螺钉内固定术
667	C09肛肠科	2021-09-08	2021-09-21	3143325	宋碎生	男	48Y	髌骨骨折	脂肪肝;乙型肝炎小三阳;高血压病;前列腺结石	治愈	余可和	余可和	陈鹏博	皮肤和皮下组织非切除性清创;髌骨骨折切开复位螺钉内固定术
668	C09肛肠科	2021-11-10	2021-11-17	3162748	郑晓芳	女	40Y	桡骨下端骨折	肝病;肾结石	治愈	王振文	水小龙	水小龙	桡骨骨折切开复位螺钉内固定术
669	C09肛肠科	2021-11-12	2021-11-17	3162826	戴晓阳	男	44Y	胫骨骨折	下肢肌肉和肌腱的损伤;闭合性胫骨平台骨折;膝关节积液	治愈	杨雷	杨雷	张月雷	胫骨骨折切开复位螺钉内固定术
670	C09肛肠科	2021-11-10	2021-11-18	3163170	黄信利	男	39Y	锁骨骨折	多发性肋骨骨折;前列腺结石	好转	黄俊武	黄俊武	王鉴顺	锁骨骨折切开复位螺钉内固定术
671	C09肛肠科	2021-11-13	2021-11-24	3164958	陈顺活	男	45Y	肛瘘	桡骨骨折;高血压病;室性早搏;取除骨折内固定装置	好转	刘长宝	陈敏远	陈敏远	桡骨内固定物取出术;肛瘘切除术
672	C10感染内科	2020-12-16	2021-01-04	3055409	卢益尧	男	80Y	肺部感染	心脏停搏复苏成功;胆囊结石;血液和造血器官特指疾病;股骨粗隆间骨折;下肢动脉粥样硬化;胸腔积液;口腔感染	好转	潘陈为	周光耀	黄珊珊	股骨骨折闭合复位钢针内固定术
673	C10感染内科	2020-12-17	2021-01-12	3057721	蒋明正	男	41Y	胸椎骨折	胸腔积液;下肢静脉血栓形成;截瘫;精神分裂症;开放性多发性损伤;脊柱骨折;肾结石;脊髓损伤;肺挫伤;椎管狭窄;胆囊息肉;药物性肝炎	治愈	诸葛璐	郑毅	李杰	后入路胸腰椎融合术;胸椎植骨术;胸椎椎板切除减压术
674	C10感染内科	2021-01-04	2021-01-24	3062313	郑元益	男	47Y	下肢软组织感染	前列腺结石;肾结石;后天性肾囊肿;下肢动脉粥样硬化;下肢骨折	好转	诸葛璐	金玲湘	李杰
675	C10感染内科	2021-03-28	2021-03-29	3082625	左斌	男	30Y	肱骨上端骨折		好转	洪建军	余洋	余洋
676	C10感染内科	2021-03-06	2021-04-10	3086369	池菊妹	女	87Y	肝脓肿	肋骨骨折;高血压病;下肢动脉粥样硬化;脂肪肝;2型糖尿病;骨质增生	好转	潘陈为	周光耀	黄珊珊
677	C10感染内科	2021-03-25	2021-04-18	3089435	金锦寿	男	85Y	肺炎克雷伯杆菌感染	中毒性脑病;脑梗死;高血压病;肝囊肿;肾结石;膝关节病;半月板变性;陈旧性股骨粗隆间骨折;肺部感染;高钠血症;高氯血症;陈旧性股骨颈骨折	治愈	周光耀	周光耀	黄珊珊
678	C10感染内科	2021-04-12	2021-04-24	3091159	陈爱丽	女	78Y	肺部感染	2型糖尿病;下肢静脉血栓形成;后天性脑穿通畸形;骨折治疗后恢复期;下肢动脉粥样硬化	好转	诸葛璐	方佩佩2	李杰
679	C10感染内科	2021-04-10	2021-05-26	3102133	周碎弟	女	68Y	腰椎峡部裂	脊柱结核;骨质疏松;特指手术后状态;特指感染性脊椎病;腰椎滑脱;特指肾盂积水;胆囊结石;革兰阴性病原体败血症;胸椎骨折;下肢动脉粥样硬化;单纯性肾囊肿	治愈	徐晖	王胜	王胜	经皮椎动脉球囊扩张成形术;骨髓穿刺活检
680	C10感染内科	2021-06-06	2021-06-15	3108868	叶用夫	男	41Y	酒精性肝炎	酒精性脂肪肝;肺结节;陈旧性肋骨骨折	好转	潘陈为	周光耀	黄珊珊
681	C10感染内科	2021-06-02	2021-06-23	3111390	周碎弟	女	68Y	特指感染性脊椎病	胸椎骨折;急性阑尾炎;脊柱结核;特指肾盂积水;骨质疏松;特指手术后状态;后天性肾囊肿;下肢动脉粥样硬化;腰椎峡部裂;腰椎滑脱;胆囊结石	好转	潘陈为	周光耀	黄珊珊
682	C10感染内科	2021-06-20	2021-07-27	3123469	王美英	女	74Y	导管相关性感染	痛风;慢性肾脏病5期;特指手术后状态;腰椎骨折;肾结石;骨质疏松;胆囊结石;动脉粥样硬化;金黄色葡萄球菌感染;高血压性肾病;脑梗死后遗症;甲状腺机能减退症	治愈	潘陈为	周光耀	黄珊珊
683	C10感染内科	2021-07-24	2021-08-03	3125973	程建英	女	59Y	药物性肝炎	颈动脉硬化;肺大泡;胆汁淤积性肝炎;陈旧性肋骨骨折	好转	诸葛璐	李杰	李杰
684	C10感染内科	2021-07-27	2021-08-23	3133448	林鸿爕	男	68Y	克雷伯杆菌败血症	肝功能异常;高血压病;糜烂性胃炎;十二指肠球炎;颈动脉硬化;肝囊肿;肺嗜酸性粒细胞增多症;后天性肾囊肿;陈旧性肋骨骨折;肺炎克雷伯杆菌感染;下肢动脉粥样硬化;肝片吸虫病;肾结石	好转	潘陈为	潘陈为	黄珊珊
685	C10感染内科	2021-06-30	2021-08-27	3134819	李澄澄	女	58Y	脓毒血症	肺部感染;脑梗死;直肠出血;直肠溃疡;肱骨外科颈骨折;真菌感染;肺炎克雷伯杆菌感染;念珠菌性败血症;泌尿道感染;老年性脑萎缩;2型糖尿病;胸腔积液;慢性肾衰竭	好转	诸葛璐	李杰	217134
686	C10感染内科	2021-08-17	2021-08-29	3135542	叶正国	男	80Y	肺部感染	泌尿道感染;血管性痴呆;颈动脉硬化;锁骨下动脉粥样硬化;多发性脑梗死;高血压病;陈旧性肋骨骨折;椎动脉粥样硬化;下肢动脉粥样硬化;下肢静脉血栓形成;特指手术后状态	好转	诸葛璐	李杰	217134
687	C10感染内科	2021-08-23	2021-08-31	3136073	陈娇娥	女	84Y	脓毒血症	脑梗死;高血压性心脏病;2型糖尿病;颈动脉硬化;下肢动脉粥样硬化;股动脉闭塞;脂肪肝;脑卒中后遗症;肾结石;肱骨骨折;锁骨下动脉粥样硬化;肝回声不均;肝血管瘤;肩关节半脱位	好转	诸葛璐	李杰	217134
688	C10感染内科	2021-10-05	2021-10-18	3151886	陈银元	男	75Y	脓毒血症	颈动脉硬化;食管裂孔疝;慢性萎缩性胃炎;胃息肉;后天性肾囊肿;食管炎;前列腺增生;髂骨骨折;中毒性肝炎;肺部感染;2型糖尿病	好转	诸葛璐	李杰	吴佐罗
689	C10感染内科	2021-09-29	2021-10-28	3155660	任国中	男	77Y	脓毒血症	腔隙性脑梗死;褥疮;肺部感染;高血压性心脏病;老年性脑萎缩;动脉粥样硬化;后天性肾囊肿;肋骨骨折;脑梗死后遗症;2型糖尿病	治愈	诸葛璐	李杰	吴佐罗
690	C10感染内科	2021-10-19	2021-10-31	3156699	蔡秋香	女	75Y	念珠菌性败血症	原发性胆汁性肝硬变;肝肿物;肺部感染;上消化道出血;开放性多发性损伤;脑挫伤;创伤性蛛网膜下腔出血;头皮血肿;多发性肋骨骨折;胸腔积液;耻骨骨折;多处挫伤;高血压病;腹股沟疝	好转	诸葛璐	李杰	吴佐罗
691	C10感染内科	2021-10-30	2021-11-01	3156895	赖俊能	男	27Y	肱骨下端骨折	肩胛骨骨折;内踝骨折;肘关节脱位;尺骨桡骨远端骨折;骰骨骨折	好转	潘骏	冯永增	冯永增
692	C10感染内科	2021-11-02	2021-11-15	3161925	张其民	男	54Y	药物性肝损害	胆囊结石;肝血管瘤;肋骨骨折;锁骨骨折	好转	潘陈为	方佩佩2	林秀珍
693	C10感染内科	2021-11-21	2021-11-23	3164875	郑国米	男	65Y	脓毒血症	痛风;特指手术后状态;多发性肋骨骨折;高血压病;脂肪肝;后天性肾囊肿;前列腺增生;下肢动脉粥样硬化	好转	诸葛璐	李杰	吴佐罗
694	C10感染内科	2021-10-31	2021-11-28	3166314	黄松生	男	73Y	脓毒血症	呼吸衰竭;重症肺炎;急性肾衰竭;冠状动脉粥样硬化性心脏病;高血压病;腰椎骨折;后天性肾囊肿;肾结石;下肢动脉粥样硬化;胸椎骨折;骨质疏松伴病理性骨折	好转	诸葛璐	李杰	吴佐罗
695	C10感染内科	2021-11-13	2021-12-04	3168243	王久鑫	男	26Y	化脓性脑膜炎	额骨骨折;脑脊液鼻漏;颅腔积气;脂肪肝;颅底骨折;眶骨骨折;上颌骨骨折;筛窦骨折;颧骨骨折;特指手术后状态	好转	潘陈为	方佩佩2	林秀珍
696	C10感染内科	2021-11-21	2021-12-27	3176274	王连连	女	61Y	大肠杆菌败血症	皮肤和皮下组织特指局部感染;子宫钙化;肺部感染;褥疮;低蛋白血症;缺铁性贫血;2型糖尿病;神经源性膀胱;高血压病;骨折治疗后恢复期;睡眠障碍;动脉粥样硬化;下肢静脉血栓形成;子宫平滑肌瘤;泌尿道感染	好转	潘陈为	方佩佩2	林秀珍	胸腔闭式引流术
697	C11肾内科	2020-12-22	2021-01-06	3055990	黄爱姿	女	47Y	慢性肾炎综合征	痛风;脂肪肝;肾病型肾炎;取除骨折内固定装置;高血压病;后天性肾囊肿	好转	李占园	叶菡洋	潘敏
698	C11肾内科	2021-01-09	2021-01-13	3058504	彭小志	男	42Y	痛风	胆囊结石;肾功能损害引起痛风;高血压性肾病;腕骨骨折;前列腺结石;慢性肾衰竭	好转	戴彩香	戴彩香	戴彩香
699	C11肾内科	2021-01-17	2021-01-18	3060148	潘秀兰	女	66Y	多肌炎	恶性肿瘤手术后随诊检查;骨质疏松;胸椎骨折	好转	李占园	潘敏	潘敏
700	C11肾内科	2020-12-26	2021-01-24	3062688	历云弟	女	83Y	尿毒症	陈旧性股骨粗隆间骨折;腹膜透析;低钾血症;痛风;心功能不全;消化性溃疡;心房颤动;后天性肾囊肿;慢性肾脏病5期	好转	郑育	郑育	郑育
701	C11肾内科	2021-01-12	2021-02-13	3067663	谢卿亨	男	66Y	肾病综合征，膜性肾病	下肢骨折;腹水;前列腺增生;肝囊肿;胸腔积液;乙型病毒性肝炎;颈动脉硬化;高血压病	好转	戴彩香	戴彩香	戴彩香
702	C11肾内科	2021-02-04	2021-02-14	3068180	陈阿云	女	72Y	2型糖尿病	腰椎间盘突出;颈椎间盘突出;颈动脉硬化;下肢动脉粥样硬化;高血压病;陈旧性踝关节骨折;继发性甲状腺功能减退症	好转	毛朝鸣	廖秋眉	潘殊方
703	C11肾内科	2021-02-13	2021-02-17	3069278	谢卿亨	男	66Y	肾病综合征，膜性肾病	颈动脉硬化;高血压病;下肢骨折;腹水;前列腺增生;肝囊肿;胸腔积液;乙型病毒性肝炎	好转	戴彩香	戴彩香	戴彩香
704	C11肾内科	2021-02-10	2021-02-21	3070646	颜维远	男	65Y	股骨颈骨折	左前分支传导阻滞;高血压病;支气管扩张伴感染;慢性肾炎综合征;骨质疏松;褥疮;泌尿道感染;肺大泡;截瘫	好转	毛朝鸣	赵艳玲	潘殊方
705	C11肾内科	2021-02-02	2021-02-22	3071211	潘洪聪	男	64Y	2型糖尿病性肾病	肝硬化失代偿期;高血压病;慢性肾脏病5期;2型糖尿病;2型糖尿病性周围神经病;腹膜透析;股骨粗隆间骨折	好转	李占园	李占园	潘敏
706	C11肾内科	2021-02-10	2021-02-24	3071998	李加明	男	51Y	腹膜炎	高血压病;2型糖尿病;特指手术后状态;腓骨骨折;前列腺增生;冠状动脉粥样硬化性心脏病;高钾血症	好转	郑育	郑育	黄文
707	C11肾内科	2021-01-25	2021-02-24	3072025	王美英	女	74Y	高血压性肾病	甲状腺机能减退症;高血压病;脑梗死后遗症;痛风;骨质疏松;腰椎骨折;导管相关性感染	好转	毛朝鸣	赵艳玲	潘殊方
708	C11肾内科	2021-03-03	2021-03-06	3075198	洪钻祥	男	43Y	强直性脊柱炎	颈动脉硬化;动脉粥样硬化;取除骨折内固定装置	好转	王红	张益前	廖秋眉
709	C11肾内科	2021-02-03	2021-03-09	3076184	朱明兰	女	65Y	2型糖尿病性肾病	2型糖尿病;老年性脑萎缩;2型糖尿病性视网膜病变;贫血;癫痫;腔隙性脑梗死;单纯性甲状腺肿;胆囊管结石;骨折治疗后恢复期;双眼白内障	好转	赵艳玲	黄文	黄文
710	C11肾内科	2021-02-28	2021-03-27	3082300	谢春兰	女	72Y	导管相关性感染	慢性肾炎综合征;血液透析;2型糖尿病;心房颤动;高血压病;非毒性多结节性甲状腺肿;败血症;呼吸道感染;骨折治疗后恢复期	治愈	王红	张益前	廖秋眉
711	C11肾内科	2021-02-24	2021-03-28	3082449	王美英	女	74Y	尿毒症	高血压病;高血压性肾病;导管相关性感染;脑梗死后遗症;骨质疏松;甲状腺机能减退症;腰椎骨折;手术后随诊检查;痛风	好转	毛朝鸣	郑育	潘殊方
712	C11肾内科	2021-03-09	2021-04-08	3085928	朱明兰	女	65Y	2型糖尿病性肾病	白内障（单侧）;骨折治疗后随诊检查;肺部感染;2型糖尿病性视网膜病变;胆囊结石;单纯性甲状腺肿;腔隙性脑梗死;癫痫;肋骨骨折;慢性肾脏病5期;腹膜透析;轻度贫血;后天性肾囊肿	好转	赵艳玲	黄文	黄文
713	C11肾内科	2021-03-20	2021-04-10	3086536	李加明	男	51Y	腹膜透析后腹膜炎	冠状动脉粥样硬化性心脏病;腹膜透析;2型糖尿病性视网膜病变;2型糖尿病性周围神经病;前列腺增生;后天性肾囊肿;肾结石;腓骨骨折;高血压病;2型糖尿病性肾病;颈动脉硬化;肝钙化灶	好转	赵艳玲	黄文	黄文
714	C11肾内科	2021-03-29	2021-04-17	3088668	王美珠	女	72Y	急性肾衰竭	肺部感染;呼吸衰竭;胸腔积液;高血压病;冠状动脉粥样硬化性心脏病;心力衰竭;2型糖尿病;后天性肾囊肿;慢性肾脏病5期;脑梗死后遗症;腰椎骨折;下肢动脉粥样硬化	好转	赵艳玲	赵艳玲	黄文
715	C11肾内科	2021-03-24	2021-04-21	3090454	吴章建	男	30Y	高血压性肾病	高血压病;高血压性心脏病;痛风;甲状腺囊肿;肺部感染;多浆膜腔积液;肋骨骨折;后天性肾囊肿;房室传导阻滞;左前分支传导阻滞	好转	王红	张益前	廖秋眉
716	C11肾内科	2021-04-17	2021-04-25	3091911	罗锡钦	男	82Y	痛风	肝功能不全;肝内胆管结石;前列腺增生;骨质疏松;腔隙性脑梗死;老年性脑萎缩;肋骨骨折;动脉粥样硬化	好转	王红	张益前	廖秋眉
717	C11肾内科	2021-04-11	2021-04-26	3092225	吕丽珍	女	75Y	类风湿性关节炎	胆囊结石;胸腺良性肿瘤;肾错构瘤;骨质疏松;全身性骨关节炎;完全性右束支传导阻滞;2型糖尿病;急性胃肠炎;胸椎骨折;肋骨骨折;高血压病	好转	王红	张益前	廖秋眉
718	C11肾内科	2021-04-25	2021-05-02	3094191	曾惠珍	女	72Y	骨质疏松伴病理性骨折	腰椎骨折;高血压病;脊柱侧弯;乳突炎;多发性脑梗死	好转	王红	张益前	廖秋眉
719	C11肾内科	2021-04-21	2021-05-03	3094595	吴章建	男	30Y	高血压性肾病	痛风;甲状腺囊肿;肺部感染;多浆膜腔积液;肋骨骨折;房室传导阻滞;脾大;特指心律失常;高血压病;高血压性心脏病;后天性肾囊肿	好转	王红	王红	廖秋眉	腹膜透析腹腔法置管术
720	C11肾内科	2021-03-28	2021-05-05	3095249	王美英	女	74Y	尿毒症	高血压性肾病;脑血管病后遗症;特指甲状腺功能减退症;脓毒血症;痛风;脑梗死后遗症;高血压病;胸椎骨折;骨质疏松;导管相关性感染	好转	毛朝鸣	郑育	潘殊方
721	C11肾内科	2021-05-03	2021-05-17	3099337	滕世金	女	74Y	类风湿性关节炎	胆囊结石;下肢动脉粥样硬化;高血压病;骨质疏松;胸椎骨折	好转	王红	张益前	张益前
722	C11肾内科	2021-05-19	2021-05-25	3102019	黄洪福	男	61Y	肾移植状态	高血压病;丙肝病毒携带者;慢性肾脏病5期;骨折治疗后恢复期;人工髋关节	其他	毛朝鸣	郑育	潘殊方	上肢血管超声检查;为肾透析的动静脉造瘘术
723	C11肾内科	2021-05-19	2021-06-05	3105431	高朝明	男	47Y	全身性硬皮病	陈旧性肋骨骨折	好转	王红	张益前	张益前
724	C11肾内科	2021-06-01	2021-06-08	3106590	黄秋玉	女	70Y	2型糖尿病性肾病	老年性脑萎缩;动脉粥样硬化;多发性脑梗死;高血压病;骨折治疗后随诊检查;2型糖尿病性视网膜病变	好转	周志宏	赵艳玲	施珍
725	C11肾内科	2021-05-11	2021-06-09	3107020	吴章建	男	30Y	高血压性肾病	心律失常;甲状腺囊肿;后天性肾囊肿;腹膜透析;肋骨骨折;多浆膜腔积液;痛风	好转	王红	张益前	徐晓燕2
726	C11肾内科	2021-06-12	2021-06-20	3110677	黄菊花	女	61Y	强直性脊柱炎	原发性双侧膝关节病;腰椎间盘突出;胸椎骨折;下肢静脉曲张;动脉粥样硬化;肾结石	好转	王红	张益前	廖秋眉
727	C11肾内科	2021-06-22	2021-06-26	3112453	吴玉英	女	71Y	蛋白尿	高血压病;腰椎骨折;后天性肾囊肿	治愈	毛朝鸣	李占园	潘殊方
728	C11肾内科	2021-06-09	2021-06-26	3112665	吴章建	男	30Y	尿毒症	高血压性心脏病;痛风;甲状腺囊肿;多浆膜腔积液;肋骨骨折;后天性肾囊肿;脾大;特指心律失常;高血压性肾病	好转	王红	张益前	徐晓燕2
729	C11肾内科	2021-07-03	2021-07-05	3115766	高朝明	男	47Y	结缔组织的系统性受累	陈旧性肋骨骨折	好转	周志宏	张益前	徐晓燕2
730	C11肾内科	2021-06-06	2021-07-08	3116711	张丽丽	女	80Y	痛风性关节炎	心房颤动;股骨粗隆间骨折;冠状动脉粥样硬化性心脏病;肾功能损害引起痛风;高血压病	好转	赵艳玲	郑淑蓓	施珍	单根导管冠状动脉造影
731	C11肾内科	2021-06-26	2021-07-17	3120032	王庆富	男	58Y	慢性肾衰竭	心功能Ⅳ级;冠状动脉粥样硬化性心脏病;高血压病;陈旧性肋骨骨折;后天性肾囊肿;肾结石;肺部感染	好转	周志宏	张益前	徐晓燕2
732	C11肾内科	2021-06-30	2021-07-18	3120463	郑庆真	男	72Y	痛风性关节炎	高血压病;骨质疏松;胸椎骨折;高脂血症;脂肪肝;后天性肾囊肿;尿酸性肾病;前列腺增生;腰和特指椎间盘疾患伴有脊髓病;脊椎退行性病变;血管瘤;痛风;肾结石	好转	周志宏	张益前	徐晓燕2
733	C11肾内科	2021-07-10	2021-07-21	3121618	黄永清	男	74Y	慢性肾脏病5期	2型糖尿病性肾病;高血压病;前列腺增生;特指动脉动脉粥样硬化;下肢动脉粥样硬化;陈旧性股骨骨折;胆囊结石;骨折治疗后随诊检查	好转	李占园	陈琰	潘殊方
734	C11肾内科	2021-07-17	2021-07-21	3121665	张阿英	女	76Y	高血压病	恶性肿瘤手术后随诊检查;冠状动脉粥样硬化;骨折治疗后恢复期;2型糖尿病	未愈	李占园	陈琰	潘殊方
735	C11肾内科	2021-08-03	2021-08-09	3128383	王培旭	男	73Y	慢性肾脏病5期	腹膜透析;高血压性肾病;心房颤动;下肢动脉粥样硬化;陈旧性肋骨骨折;甲状腺囊肿;甲状腺良性肿瘤;甲状腺结节;肝囊肿;肾结石;后天性肾囊肿	好转	李占园	陈琰	潘殊方
736	C11肾内科	2021-08-07	2021-08-10	3128706	高朝明	男	47Y	硬皮病性肺间质纤维化	陈旧性肋骨骨折;肺结节	好转	周志宏	张益前	张益前
737	C11肾内科	2021-08-04	2021-08-15	3130508	金霭玲	女	68Y	泌尿道感染	骨质疏松伴病理性骨折;高血压病;脂肪肝;肝囊肿;特指手术后状态;手术后随诊检查;胆囊切除术后状态;双眼白内障	好转	周志宏	张益前	徐晓燕2
738	C11肾内科	2021-08-01	2021-08-25	3134367	吴章建	男	30Y	高血压性肾衰竭	心律失常;高血压性心脏病;Ⅰ度房室传导阻滞;后天性肾囊肿;痛风;甲状腺囊肿;陈旧性肋骨骨折;腹膜透析	好转	张益前	张益前	廖秋眉
739	C11肾内科	2021-08-05	2021-09-04	3137518	李加明	男	52Y	2型糖尿病性肾病	冠状动脉粥样硬化性心脏病;高血压病;腓骨骨折;2型糖尿病性周围神经病;2型糖尿病性视网膜病变;腹膜透析后腹膜炎;慢性肾脏病5期;特指手术后状态;呼吸道感染;后天性肾囊肿;肾结石;颈动脉硬化;前列腺增生;肝钙化灶	好转	李占园	郑淑蓓	潘殊方
740	C11肾内科	2021-09-21	2021-09-23	3143965	高朝明	男	47Y	硬皮病性肺间质纤维化	陈旧性肋骨骨折	好转	毛朝鸣	张益前	张益前
741	C11肾内科	2021-09-14	2021-09-26	3145112	王文松	男	44Y	痛风性关节炎	痛风;急性肾衰竭;脂肪肝;胆囊结石;陈旧性肋骨骨折	好转	毛朝鸣	张益前	张益前
742	C11肾内科	2021-09-13	2021-10-09	3148942	戴阿金	女	82Y	2型糖尿病性肾病	血液透析;骨质疏松;动脉粥样硬化;腔隙性脑梗死;高血压病;心功能不全;骨盆骨折;腰椎骨折;慢性肾脏病5期;胸腔积液	好转	李占园	郑淑蓓	潘殊方
743	C11肾内科	2021-09-26	2021-10-10	3149289	丁萍	女	52Y	混合性结缔组织病	间质性肺病;特指手术后状态;陈旧性桡骨骨折	未愈	毛朝鸣	张益前	张益前
744	C11肾内科	2021-09-08	2021-10-10	3149366	黄永清	男	74Y	慢性肾脏病5期	多发性脑梗死;颈动脉硬化;2型糖尿病性肾病;血液透析;高血压病;胆囊结石;前列腺增生;下肢动脉粥样硬化;陈旧性股骨骨折;手术后恢复期	好转	李占园	郑淑蓓	潘殊方	股静脉穿刺置管术;颈内静脉穿刺中心静脉置管术
745	C11肾内科	2021-10-14	2021-10-18	3152077	姜小玲	女	61Y	硬皮病性肺间质纤维化	间质性肺病;高血压病;肋骨骨折	好转	毛朝鸣	张益前	张益前
746	C11肾内科	2021-10-10	2021-10-24	3154127	余德霓	女	83Y	2型糖尿病性肾病	慢性肾脏病5期;轻度贫血;高尿酸血症;高血压性心脏病及肾脏病;颈动脉硬化;下肢动脉粥样硬化;胆囊结石;胆囊息肉;后天性肾囊肿;肋骨骨折;纤维囊性乳腺病	好转	毛朝鸣	王红	金怡
747	C11肾内科	2021-10-13	2021-11-10	3160438	尤春花	女	81Y	慢性肾脏病5期	肝硬化;心房颤动;老年性心脏病;高血压病;胸椎骨折;神经源性膀胱;血液透析;2型糖尿病性肾病;腰椎骨折;胆囊结石;肝囊肿;下肢动脉粥样硬化;后天性肾囊肿;痛风;骨质疏松	好转	郑育	黄文	黄文	血液透析
748	C11肾内科	2021-10-30	2021-11-13	3160992	郭秋香	女	63Y	系统性红斑狼疮	骨质疏松;腰椎骨折;高血压病;甲状腺结节;耻骨骨折;特指动脉动脉粥样硬化	好转	毛朝鸣	王红	金怡	唇活检
749	C11肾内科	2021-10-17	2021-11-14	3161714	孙权光	男	69Y	尿毒症	胸腔积液;肺部感染;肾恶性肿瘤;骨继发恶性肿瘤;血液透析;低钾血症;高血压病;内踝骨折;手术后恢复期;轻度贫血	好转	李占园	郑淑蓓	潘殊方	血液透析
750	C11肾内科	2021-11-08	2021-11-17	3162576	周春凤	女	67Y	干燥综合征	骨质疏松;胸椎骨折;脊椎退行性病变;高血压Ⅱ期;颈动脉硬化;腔隙性脑梗死;颈椎间盘突出;房性早搏;Ⅰ度房室传导阻滞;主动脉钙化;肾错构瘤	好转	毛朝鸣	王红	金怡
751	C11肾内科	2021-11-10	2021-11-30	3167126	李加明	男	52Y	腹膜透析中腹腔感染	2型糖尿病性周围神经病;2型糖尿病性肾病;后天性肾囊肿;冠状动脉粥样硬化性心脏病;高血压病;陈旧性腓骨骨折;前列腺增生;颈动脉硬化;肝钙化灶;前列腺结石;肾结石;慢性肾脏病5期;腹膜透析;2型糖尿病性视网膜病变	好转	李占园	郑淑蓓	潘殊方	腹膜透析
752	C11肾内科	2021-11-28	2021-12-06	3169046	项洪畴	男	74Y	2型糖尿病性肾病	慢性阻塞性肺病伴急性加重;肺部感染;肺大泡;高血压性心脏病;面部脂肪瘤;下肢动脉粥样硬化;骨质疏松;股骨粗隆间骨折;肋骨骨折;心功能不全	好转	周志宏	王红	金怡
753	C11肾内科	2021-11-29	2021-12-06	3169327	张宗友	男	73Y	强直性脊柱炎	骨质疏松;慢性乙型病毒性肝炎;后天性肾囊肿;支气管扩张伴感染;腰椎间盘突出;混合型颈椎病;腰椎关节强硬;腰椎骨折	好转	周志宏	张益前	张益前
754	C11肾内科	2021-12-05	2021-12-13	3171551	潘文眉	女	81Y	高血压性肾病	导管相关性感染;血液透析;甲状腺结节;下肢动脉粥样硬化;肾上腺肿物;颈动脉硬化;骨折治疗后恢复期;先天性心脏病	好转	王红	王红	金怡	血液透析
755	C11肾内科	2021-11-14	2021-12-14	3172128	王美英	女	74Y	高血压性肾衰竭	痛风;甲状腺机能减退症;败血症;血液透析;肠梗阻;骨质疏松;腰椎骨折;脑梗死后遗症	好转	毛朝鸣	赵艳玲	潘殊方	血液透析
756	C11肾内科	2021-12-14	2021-12-15	3172194	王美英	女	74Y	高血压性肾衰竭	血液透析;肠梗阻;败血症;脑梗死后遗症;甲状腺机能减退症;痛风;骨质疏松;腰椎骨折	好转	毛朝鸣	赵艳玲	潘殊方	血液透析
757	C11肾内科	2021-12-15	2021-12-19	3173823	蔡爱莲	女	61Y	横纹肌溶解症	甲状腺结节;甲状腺囊肿;乳腺良性肿瘤;腰椎间盘突出;双眼白内障;胫腓骨闭合性骨折	好转	郑育	郑育	徐晓燕2
758	C11肾内科	2021-12-15	2021-12-22	3174608	周文龙	男	78Y	肾功能损害引起痛风	痛风;轻度贫血;心脏病;肺部感染;皮肤和皮下组织局部感染;室性早搏;肺结节;甲状腺囊肿;主动脉钙化;下肢动脉粥样硬化;脂肪肝;后天性肾囊肿;肾错构瘤;前列腺增生;肋骨骨折	好转	王红	王红	金怡
759	C11肾内科	2021-12-19	2021-12-27	3176330	李加明	男	52Y	腹膜透析后腹膜炎	2型糖尿病性肾病;2型糖尿病性视网膜病变;2型糖尿病性周围神经病;肾结石;后天性肾囊肿;特指手术后状态;高血压病;腹膜透析;冠状动脉粥样硬化性心脏病;腓骨骨折;前列腺增生;前列腺结石;颈动脉硬化;肝钙化灶	好转	郑育	黄文	黄文
760	D06(ICU)	2021-01-13	2021-01-16	3059809	赵有仓	男	87Y	肺部感染	胆囊结石;急性冠脉综合征;高血压病;慢性阻塞性肺病;毁损肺;双眼白内障;股骨粗隆间骨折;呼吸衰竭;动脉硬化性脑病;下肢动脉粥样硬化	未愈	程碧环	程碧环	王瑞丽
761	D06(ICU)	2021-01-23	2021-01-31	3064656	南成强	男	71Y	创伤性脑疝	创伤性肝破裂;肺挫伤;肩胛骨骨折;骨盆骨折;颅骨骨折;循环衰竭;高钾血症;中枢性呼吸衰竭;特指腹内器官损伤;失血性休克;大脑撕裂伤;急性肾衰竭;创伤性脾破裂	死亡	程碧环	潘利伟	潘利伟	腹壁切开引流术;剖腹探查术;脑膜切开伴硬脑膜下腔血肿清除术;颅骨切除减压术;髂内动脉栓塞术;肝破裂修补术;脾修补术;肠粘连松解术
762	D06(ICU)	2021-01-22	2021-02-02	3064987	郑莲香	女	88Y	股骨粗隆间骨折	多发性肋骨骨折;乳房后天性缺失;高血压病;心房颤动;呼吸衰竭;肺部感染	好转	庄荣	庄荣	陈德准	股骨骨折切开复位髓内针内固定术
763	D06(ICU)	2021-01-06	2021-02-04	3065256	欧阳亦理	男	62Y	颈部脊髓损伤	肺部感染;截瘫;颈椎关节强硬;呼吸衰竭;多发性肋骨骨折;特指治疗后恢复期	未愈	程碧环	戴凌燕	戴凌燕	颈椎后路单开门椎管减压术
764	D06(ICU)	2021-02-05	2021-02-06	3066028	李高义	男	36Y	创伤性硬膜下出血	枕骨骨折;顶骨骨折;头皮血肿;创伤性蛛网膜下腔出血;创伤性硬膜外血肿;脑挫伤;颞骨骨折	好转	林孟相	魏大臻	胡建坚	颅骨切除减压术;脑膜切开伴硬脑膜下腔血肿清除术
765	D06(ICU)	2020-12-17	2021-02-09	3067161	杨贵春	男	47Y	脑干损伤	中枢性呼吸衰竭;肺部感染;多发性颈椎骨折;颈部脊髓损伤;颈椎脱位;循环衰竭;急性四肢瘫	死亡	程碧环	吴海亚	吴海亚	前入路颈椎融合术;颈椎脱位闭合复位术;颈椎前路椎管减压术;椎弓根钉内固定术
766	D06(ICU)	2021-01-18	2021-02-15	3069191	陆光强	男	62Y	颈部脊髓损伤	中枢性呼吸衰竭;截瘫;肺部感染;颈椎脱位;颈部挫伤;特指颈椎骨折	死亡	龚裕强	林孟相	林孟相	前入路颈椎间盘切除术;椎弓根钉内固定术;颈椎植骨术
767	D06(ICU)	2020-12-25	2021-02-17	3069875	胡云兰	女	68Y	颅内损伤伴长时间昏迷	眼睑挫伤;多处挫伤;肾挫伤;创伤性气胸;创伤性脑血肿;创伤性蛛网膜下腔出血;脑挫伤;肩胛骨骨折;胸骨骨折;颅底骨折;泌尿道感染;肺部感染;特指掌骨骨折;多发性肝囊肿;胫腓骨干骨折;脑脊液鼻漏;开放性手指损伤不伴指甲损害;肝损伤;肺特指损伤	好转	林孟相	陈建时	陈建时
768	D06(ICU)	2021-02-21	2021-02-23	3071591	林育金	男	55Y	创伤性脑血肿	腰椎椎管狭窄;高血压病;脑肿瘤切除史;面部软组织挫伤;坐骨骨折;头皮血肿;脑挫伤;耻骨骨折;腰椎骨折;颅底骨折;额骨骨折	好转	戴凌燕	戴凌燕	张文武	脑内血肿清除术;颅骨切除减压术
769	D06(ICU)	2021-02-23	2021-02-24	3071982	陈春英	女	68Y	创伤性硬膜下出血	糖尿病;高血压病;外伤性硬脑膜下积液;肾移植状态;面部软组织挫伤;肾结石;慢性肾脏病5期;多发性肋骨骨折;头皮血肿;创伤性脑疝;创伤性蛛网膜下腔出血;创伤性硬膜外血肿;脑挫伤;枕骨骨折;肾萎缩	未愈	林孟相	陈建时	陈建时	脑膜切开伴硬脑膜下腔血肿清除术;颅骨切除减压术
770	D06(ICU)	2021-02-22	2021-03-01	3073983	袁春花	女	77Y	脓毒血症	高血压病;心房颤动;泌尿道感染;股骨粗隆间骨折;肺部感染;多器官功能障碍综合征(MODS)	未愈	程碧环	吴海亚	吴海亚	股骨骨折闭合复位髓内针内固定术
771	D06(ICU)	2021-04-03	2021-04-10	3087032	陈岩翠	女	88Y	多发性脑梗死	股骨粗隆间骨折;高血压病;下肢静脉血栓形成;下肢动脉粥样硬化;2型糖尿病	未愈	程碧环	程碧环	王本极	股骨骨折切开复位髓内针内固定术
772	D06(ICU)	2021-04-11	2021-04-18	3089503	尤良元	男	90Y	感染性胃肠炎	多发性肝囊肿;脂肪肝;下肢动脉硬化闭塞症;骨折治疗后恢复期;感染性休克;心脏骤停;腔隙性脑梗死;脑梗死后遗症;多发性脑梗死;高血压病;高血压性心脏病;房性早搏;完全性右束支传导阻滞;慢性阻塞性肺病;下肢动脉血栓形成;颈动脉硬化;前列腺结石	死亡	龚裕强	张晓隆	张晓隆
773	D06(ICU)	2021-04-12	2021-04-28	3093523	朱启吉	男	78Y	创伤性胸部气管破裂	肺挫伤;舌骨断裂;创伤性血气胸;多发性肋骨骨折;锁骨骨折;失血性休克;肺部感染;开放性前臂多发损伤	死亡	庄荣	陈建时	陈建时	传统气管切开手术;肋骨骨折切开复位螺钉内固定术;皮肤和皮下坏死组织切除清创术
774	D06(ICU)	2021-04-19	2021-04-30	3093831	朱福春	男	84Y	股骨颈骨折	肺部感染;心功能不全;中度贫血;前列腺结石;肾结石;痛风;前列腺增生;脑梗死后遗症	治愈	庄荣	陈建时	陈建时	人工股骨头置换术
775	D06(ICU)	2021-04-22	2021-05-19	3100398	徐式娒	男	77Y	肺出血	髌骨骨折;下肢深静脉血栓形成;下肢动脉粥样硬化;特指手术后状态;凝血障碍;肺部感染;胸腔积液;急性肾衰竭;高血压病;前列腺增生	好转	程碧环	郭献阳	郭献阳
776	D06(ICU)	2021-04-27	2021-05-24	3102111	郑梦婵	女	25Y	颅内损伤伴长时间昏迷	创伤性硬膜外血肿;大脑撕裂伤;尿崩症;肾衰竭;肺部感染;呼吸衰竭;循环衰竭;头皮挫伤;额骨骨折;颞骨骨折;枕骨骨折;顶骨骨折;创伤性蛛网膜下腔出血	死亡	程碧环	陈如杰	陈如杰	脑内血肿清除术;颅骨切除减压术
777	D06(ICU)	2021-05-21	2021-05-25	3102087	张超	男	34Y	创伤性硬膜外血肿	特指手术后状态;创伤性脑疝;创伤性蛛网膜下腔出血;创伤性胸腔积液;脑挫伤;腹部损伤;肺特指损伤;失血性休克;枕骨骨折;中枢性呼吸衰竭;循环衰竭;胸部损伤;多发性肋骨骨折;腹腔积血;胰损伤;创伤性肾周血肿;髂骨骨折;骶骨骨折;耻骨骨折	未愈	林孟相	张晓隆	张晓隆	脑内血肿清除术;颅骨切除减压术;髂内动脉栓塞术
778	D06(ICU)	2021-05-08	2021-05-25	3102471	胡红菊	女	87Y	重症肺炎	股骨粗隆间骨折;成人呼吸窘迫综合征;呼吸衰竭;单眼白内障	未愈	庄荣	张文武	张文武	股骨骨折切开复位髓内针内固定术
779	D06(ICU)	2021-10-11	2021-10-12	3150017	方侃寿	男	55Y	创伤性肝破裂	创伤性血气胸;耻骨骨折;多发性腰椎骨折;头皮挫伤;腔隙性脑梗死;胸壁挫伤;代谢性酸中毒;基底节脑梗死;脑萎缩;后天性肾囊肿;盆腔损伤;创伤性皮下气肿;创伤性脾破裂;多发性肋骨骨折;失血性休克	未愈	戴凌燕	戴凌燕	戴凌燕	肝动脉栓塞术;腰动脉栓塞术;脾动脉栓塞术
780	D06(ICU)	2021-10-05	2021-10-16	3151438	杨顺敏	男	44Y	创伤性蛛网膜下腔出血	肺特指损伤;循环衰竭;多发性肋骨骨折;后天性肾囊肿;头皮血肿;颅腔积气;支气管扩张;创伤性硬膜下出血;创伤性脑疝;中枢性呼吸衰竭;多器官功能障碍综合征(MODS);肺部感染;弥漫性脑损伤;枕骨骨折	死亡	戴凌燕	戴凌燕	傅蓓蓓	颅骨切除减压术;脑内血肿清除术
781	D06(ICU)	2021-10-11	2021-10-18	3152542	蓝俊香	男	61Y	颈部脊髓损伤	肩关节脱位;高血压病;肺部感染;截瘫;颈椎脱位;肺挫伤;创伤性气胸;多发性肋骨骨折;髋臼骨折;耻骨骨折;头皮挫伤;枕骨骨折;头皮血肿;腰椎脱位	未愈	戴凌燕	戴凌燕	戴凌燕
782	D06(ICU)	2021-10-03	2021-10-18	3152550	江娇女	女	52Y	创伤性硬膜下出血	创伤性蛛网膜下腔出血;肾衰竭;创伤性脑疝;脑挫伤;创伤性脑血肿;肺部感染;皮下血肿;多发性肋骨骨折;脂肪肝	未愈	龚裕强	张晓隆	张晓隆	颅骨切除减压术;脑膜切开伴硬脑膜下腔血肿清除术
783	D06(ICU)	2021-10-18	2021-10-22	3153969	程成朱	男	63Y	颈部脊髓损伤	急性四肢瘫;多发性颈椎骨折;强直性脊柱炎;下肢动脉粥样硬化;下肢深静脉血栓形成	未愈	戴凌燕	戴凌燕	傅蓓蓓	颅骨牵引
784	D06(ICU)	2021-10-30	2021-11-06	3159711	麻狄青	男	58Y	创伤性硬膜下出血	创伤性蛛网膜下腔出血;头皮血肿;创伤性脑疝;脑挫伤;枕骨骨折;肺部感染	死亡	林孟相	魏大臻	胡建坚	颅骨切除减压术;脑内血肿清除术;心肺复苏
785	D06(ICU)	2021-10-21	2021-11-11	3160789	吴金池	男	70Y	创伤性硬膜下出血	颧骨骨折;脑挫伤;多发性肋骨骨折;锁骨骨折;肾结石伴输尿管结石;前列腺增生;药物性肝损害;头皮血肿;肺挫伤;创伤性胸腔积液;胸壁浅表损伤;创伤性蛛网膜下腔出血	好转	戴凌燕	戴凌燕	戴凌燕	颅骨切除减压术;脑内血肿清除术
786	D06(ICU)	2021-11-15	2021-11-16	3162568	王高砖	男	72Y	创伤性休克	肺结节;肱骨髁间骨折;开放性足骨折;肱骨干骨折;缺氧缺血性脑病;上肢撕脱伤;肝囊肿	死亡	林孟相	魏大臻	魏大臻	肱骨开放性骨折清创术;尺骨钢板内固定术;肱骨钢板内固定术;创面负压封闭引流[VSD];趾骨钢针内固定术
787	D06(ICU)	2021-11-16	2021-11-26	3166286	王岩武	男	85Y	腰椎骨折	腰椎椎管狭窄;高血压病;肺大泡;颈椎关节强硬;胸椎骨折;肺部感染;感染性休克;脊髓损伤;创伤性气胸;创伤性硬膜外血肿;强直性脊柱炎	未愈	林孟相	林孟相	胡建坚	脊椎骨折复位术;腰椎人工骨植骨术;椎弓根钉内固定术
788	D06(ICU)	2021-11-27	2021-11-29	3167396	潘春贵	男	82Y	创伤性脑血肿	后天性肾囊肿;肾结石;下肢动脉粥样硬化;多发性颅骨骨折;创伤性休克;鼻血肿;头皮血肿;创伤性胸腔积液;肾衰竭;肺部感染;多发性颈椎骨折;脑挫伤;创伤性蛛网膜下腔出血	未愈	林孟相	魏大臻	胡建坚	颅骨切除减压术;脑内血肿清除术
789	D06(ICU)	2021-11-22	2021-12-07	3169734	林听妹	女	71Y	肺部感染	呼吸衰竭;下肢动脉粥样硬化;急性肾衰竭;急性肝功能衰竭;慢性乙型病毒性肝炎;垂体功能减退症;继发性肾上皮质功能减退症;低促性腺激素性腺功能减退症;骨质疏松;支气管扩张;颈动脉硬化;低钠血症;陈旧性肋骨骨折;肝囊肿;多发性胸椎骨折;肺结核	未愈	戴凌燕	戴凌燕	戴凌燕
790	D06(ICU)	2021-12-05	2021-12-08	3170137	付钦次	男	63Y	创伤性硬膜下出血	创伤性脑疝;多发性肋骨骨折;头皮血肿;肺结节;创伤性蛛网膜下腔出血	好转	程碧环	程碧环	张文武	颅骨切除减压术;脑内血肿清除术
791	D06(ICU)	2021-11-20	2021-12-10	3170623	滕海建	男	60Y	创伤性十二指肠破裂	桡骨干骨折;创伤性休克;小腿挫伤;多发性肋骨骨折;肾周积液;心包积液;十二指肠憩室;胸部损伤;肺尘埃沉着病;多器官功能障碍综合征(MODS);特指手术后状态;男性盆腔炎;开放性胫腓骨干骨折;急性弥漫性腹膜炎;感染性休克	未愈	程碧环	程碧环	陈德准	胫骨外固定架固定术;皮肤和皮下坏死组织切除清创术;十二指肠破裂修补术;胃转流术[胃-肠搭桥吻合术];十二指肠造口术;创面负压封闭引流[VSD];胫骨骨折切开复位术
792	D06(ICU)	2021-12-07	2021-12-14	3172166	诸爱秋	女	60Y	股骨粗隆间骨折	肺部感染;呼吸衰竭;高血压性肾衰竭;特指贫血;2型糖尿病性肾病;慢性肾脏病5期;慢性心力衰竭;继发性甲状旁腺功能亢进症;高磷酸盐血症;高钾血症	好转	程碧环	程碧环	张文武	股骨骨折闭合复位髓内针内固定术
793	D06(ICU)	2021-11-30	2021-12-14	3172193	林秀兰	女	96Y	股骨粗隆间骨折	心脏停搏复苏成功;胸腔积液;高钠血症;肾衰竭;多发性肋骨骨折;下肢动脉粥样硬化;肝囊肿;胆囊结石;胆囊胆固醇沉着症;胫前动脉狭窄;肺气肿;下肢深静脉血栓形成	好转	龚裕强	戴凌燕	傅蓓蓓	股骨骨折闭合复位髓内针内固定术
794	D06(ICU)	2021-12-09	2021-12-23	3175246	汪贤地	男	88Y	股骨粗隆间骨折	重症肺炎;急性冠脉综合征;心功能不全;心房颤动;心房扑动;呼吸衰竭;原发性单侧膝关节病;骨质疏松;前列腺增生;胆总管扩张;肺结节;下肢动脉粥样硬化;膀胱结石;膝关节屈曲畸形	治愈	程碧环	陈如杰	陈如杰	股骨骨折闭合复位髓内针内固定术
795	D06(ICU)	2021-11-15	2021-12-25	3175808	杨家静	男	52Y	创伤性蛛网膜下腔出血	呼吸衰竭;循环衰竭;顶骨骨折;颞骨骨折;肺部感染;创伤性胸腔积液;肝炎后肝硬化;肝功能不全;头皮血肿;创伤性鼻中隔血肿;胆囊炎;肾结石;前列腺钙化灶;颈椎间盘突出;慢性乙型病毒性肝炎;脾大;肝囊肿;脑挫伤;创伤性硬膜下出血;创伤性脑疝	未愈	程碧环	王本极	王本极	有创呼吸机治疗大于等于96小时;颅骨切除减压术;心肺复苏
796	D06(ICU)	2021-12-05	2021-12-28	3177380	廖丐挺	男	39Y	创伤性硬膜下出血	胸椎骨折;多处浅表损伤;视神经损伤;眼球挫伤;感染性休克;中枢性呼吸衰竭;循环衰竭;额骨骨折;顶骨骨折;颞骨骨折;颧骨骨折;颅底骨折;上颌骨骨折;鼻骨骨折;创伤性蛛网膜下腔出血;脑挫伤;创伤性脑疝;创伤性脑血肿;颅内感染;肺挫伤;肺部感染	死亡	程碧环	程碧环	李忠旺	颅骨切除减压术;脑内血肿清除术;心肺复苏
797	D07儿童骨科、骨盆外科	2020-12-20	2021-01-01	3054475	黄仕连	女	63Y	股骨颈骨折	下肢动脉粥样硬化;2型糖尿病;脂肪肝;胸腔积液	治愈	孔建中	孔建中	陈墨川	全髋关节置换术
798	D07儿童骨科、骨盆外科	2020-12-27	2021-01-02	3054541	戴依婷	女	4Y	取除骨折内固定装置	取除骨折内固定装置;骨和关节软骨良性肿瘤	其他	张敬东	易先宏	李玉安	股骨内固定物取出术
799	D07儿童骨科、骨盆外科	2020-12-28	2021-01-02	3054542	孙静茹	女	3Y	取除骨折内固定装置		其他	张敬东	易先宏	李玉安	股骨内固定物取出术
800	D07儿童骨科、骨盆外科	2020-12-28	2021-01-02	3054545	江文博	男	3Y	开放性足损伤	特指趾骨骨折	治愈	张敬东	易先宏	李玉安	皮肤和皮下组织非切除性清创;石膏绷带固定
801	D07儿童骨科、骨盆外科	2020-12-26	2021-01-02	3054546	余可欣	女	5Y	取除骨折内固定装置		其他	张敬东	易先宏	李玉安	瘢痕松解术;胫骨内固定物取出术
802	D07儿童骨科、骨盆外科	2020-12-18	2021-01-03	3054688	张浩然	男	14Y	胫骨骨折		治愈	孔建中	孔建中	陈墨川	胫骨骨折切开复位钢板内固定术;股骨骨骺分离闭合复位术
803	D07儿童骨科、骨盆外科	2020-12-23	2021-01-03	3054690	潘迎新	男	8Y	胫腓骨干骨折		治愈	张敬东	易先宏	李玉安	胫骨骨折切开复位螺钉内固定术
804	D07儿童骨科、骨盆外科	2020-12-25	2021-01-03	3054692	刘允昊	男	8Y	股骨干骨折		治愈	孔建中	孔建中	陈墨川	股骨骨折切开复位钢板内固定术
805	D07儿童骨科、骨盆外科	2020-12-17	2021-01-03	3054701	林煜	男	22Y	跟骨骨折		治愈	孔建中	孔建中	陈墨川	关节软骨修复术;皮肤和皮下组织切开引流术;跟骨骨折切开复位螺钉内固定术
806	D07儿童骨科、骨盆外科	2020-12-28	2021-01-03	3054702	林嘉芮	女	6Y	桡骨颈骨折		治愈	张敬东	易先宏	李玉安	桡骨骨折切开复位钢针内固定术
807	D07儿童骨科、骨盆外科	2020-12-15	2021-01-03	3054703	林育琴	女	72Y	胫骨骨折	脂肪肝;骨质疏松;外踝骨折;特指肾盂积水	治愈	孔建中	孔建中	陈墨川	踝关节骨折切开复位钢板内固定术;胫骨骨折切开复位钢板内固定术
808	D07儿童骨科、骨盆外科	2020-12-28	2021-01-03	3054706	郭天佑	男	3Y	取除骨折内固定装置		其他	张敬东	易先宏	李玉安	尺骨内固定物取出术
809	D07儿童骨科、骨盆外科	2020-12-31	2021-01-03	3054708	吴家恒	男	3Y	肱骨髁上骨折		治愈	张敬东	易先宏	李玉安	肱骨骨折闭合复位钢针内固定术
810	D07儿童骨科、骨盆外科	2020-12-30	2021-01-03	3054715	周嘉铭	男	4Y	肱骨髁上骨折		治愈	张敬东	易先宏	李玉安	肱骨骨折闭合复位钢针内固定术
811	D07儿童骨科、骨盆外科	2020-12-31	2021-01-03	3054803	韦登科	男	11Y	胫骨骨折		好转	张敬东	易先宏	李玉安
812	D07儿童骨科、骨盆外科	2021-01-01	2021-01-04	3055206	张浩杰	男	1Y	肱骨髁上骨折		治愈	张敬东	易先宏	李玉安	肱骨骨折闭合复位钢针内固定术
813	D07儿童骨科、骨盆外科	2020-12-28	2021-01-04	3055238	游馨婷	女	10Y	胫腓骨闭合性骨折		治愈	张敬东	易先宏	李玉安	胫骨骨折闭合复位螺钉内固定术
814	D07儿童骨科、骨盆外科	2020-12-13	2021-01-04	3055242	陈乃水	男	41Y	胫骨骨折	踝骨闭合性骨折;距骨骨折;腰骶部脊柱骨折	治愈	孔建中	孔建中	陈墨川	关节软骨修复术;外固定架固定;踝关节骨折切开复位钢针内固定术;胫骨骨折切开复位钢针内固定术
815	D07儿童骨科、骨盆外科	2021-01-02	2021-01-05	3055485	谢涵錱	女	4Y	肱骨髁上骨折		治愈	张敬东	易先宏	王伟	肱骨骨折闭合复位钢针内固定术
816	D07儿童骨科、骨盆外科	2020-12-26	2021-01-05	3055487	邵进铸	男	80Y	股骨粗隆间骨折	膀胱结石;骨质疏松;多发性脑梗死;后天性肾囊肿;老年性脑萎缩;高血压病;脑积水;下肢静脉血栓形成	治愈	翁益民	翁益民	柯陈荣	股骨骨折闭合复位螺钉内固定术
817	D07儿童骨科、骨盆外科	2020-12-21	2021-01-05	3055493	徐永明	男	45Y	股骨干骨折	头部外伤;下肢静脉血栓形成	治愈	孔建中	孔建中	陈墨川	股骨骨折闭合复位髓内针内固定术;股静脉穿刺术;下腔静脉滤器置入术
818	D07儿童骨科、骨盆外科	2021-01-03	2021-01-05	3055498	李文浩	男	1Y	鹰嘴骨折		治愈	张敬东	易先宏	闫广奎	尺骨骨折闭合复位钢针内固定术
819	D07儿童骨科、骨盆外科	2020-12-26	2021-01-06	3055870	沈璟璟	女	80Y	股骨粗隆间骨折	骨质疏松;肝囊肿;脂肪肝;下肢动脉粥样硬化	治愈	孔建中	翁益民	柯陈荣	股骨骨折切开复位钢针内固定术
820	D07儿童骨科、骨盆外科	2020-12-26	2021-01-06	3055913	陈金勇	男	50Y	髌骨骨折	前列腺结石;股骨髁骨折;四头肌和肌腱损伤	治愈	孔建中	翁益民	柯陈荣	髌骨骨折切开复位螺钉内固定术
821	D07儿童骨科、骨盆外科	2020-12-13	2021-01-06	3055918	盛威廉	男	3Y	胫腓骨干骨折	开放性足损伤	治愈	张敬东	易先宏	李玉安	肌腱、血管、神经探查术;皮肤和皮下组织非切除性清创;腓骨骨折闭合复位术
822	D07儿童骨科、骨盆外科	2020-10-14	2021-01-06	3055923	申宇睿	男	2Y	多发性损伤	开放性骨折;下肢皮肤套脱伤;腓骨骨折;踝软组织异物残留	治愈	张敬东	易先宏	李玉安	踝关节内固定物取出术;皮肤和皮下坏死组织切除清创术;皮肤和皮下组织非切除性清创;全厚皮片移植术;踝关节骨折切开复位钢针内固定术
823	D07儿童骨科、骨盆外科	2020-12-15	2021-01-06	3055927	张兵	男	36Y	外踝骨折	脂肪肝;腓骨骨折;2型糖尿病;开放性踝损伤	治愈	孔建中	翁益民	柯陈荣	皮肤和皮下坏死组织切除清创术;皮肤和皮下组织非切除性清创;皮肤和皮下组织切开引流术;踝关节骨折闭合复位钢针内固定术;腓骨骨折切开复位钢板内固定术
824	D07儿童骨科、骨盆外科	2021-01-01	2021-01-06	3056020	林耿亦	男	7Y	肱骨髁上骨折		治愈	张敬东	易先宏	李玉安	股骨骨折闭合复位钢针内固定术
825	D07儿童骨科、骨盆外科	2020-12-28	2021-01-06	3056057	陈景荣	男	55Y	跟骨骨折	前列腺增生	治愈	孔建中	孔建中	陈墨川	跟骨植骨术;跟骨骨折切开复位钢针内固定术;关节软骨修复术
826	D07儿童骨科、骨盆外科	2021-01-05	2021-01-07	3056294	张建杭	男	3Y	取除骨折内固定装置		其他	张敬东	易先宏	李玉安	股骨内固定物取出术
827	D07儿童骨科、骨盆外科	2021-01-01	2021-01-07	3056299	黄梓轩	男	2Y	肱骨外髁骨折		治愈	张敬东	易先宏	李玉安	肱骨骨折切开复位钢针内固定术
828	D07儿童骨科、骨盆外科	2021-01-01	2021-01-07	3056301	蒋才森	男	5Y	股骨干骨折		治愈	张敬东	易先宏	李玉安	股骨骨折切开复位髓内针内固定术
829	D07儿童骨科、骨盆外科	2020-12-31	2021-01-09	3056664	秦贤军	男	32Y	尺骨骨折		治愈	孔建中	陈墨川	陈墨川	尺骨骨折切开复位钢针内固定术
830	D07儿童骨科、骨盆外科	2020-12-27	2021-01-09	3056691	张明万	男	75Y	股骨颈骨折	胆囊结石;肝囊肿;2型糖尿病;后天性肾囊肿;后天性手和腕缺失;眼球摘除术后状态;高血压Ⅱ期	治愈	孔建中	翁益民	柯陈荣	人工股骨头置换术
831	D07儿童骨科、骨盆外科	2020-12-31	2021-01-09	3056698	屠烁烁	女	4Y	特指单个手指部分或完全切断	指骨骨折	治愈	张敬东	易先宏	李玉安	甲成形术;手清创术
832	D07儿童骨科、骨盆外科	2021-01-06	2021-01-09	3056700	毛致辉	男	7Y	肱骨髁上骨折		治愈	张敬东	易先宏	李玉安	肱骨骨折闭合复位钢针内固定术
833	D07儿童骨科、骨盆外科	2020-12-26	2021-01-09	3056702	林永库	男	76Y	骨盆骨折	骨质疏松;下肢动脉粥样硬化;前列腺增生;下肢静脉血栓形成	治愈	孔建中	翁益民	柯陈荣	骨盆重建术
834	D07儿童骨科、骨盆外科	2021-01-03	2021-01-09	3056710	戴家妮	女	5Y	特指趾骨骨折		治愈	张敬东	易先宏	李玉安	趾骨骨折闭合复位钢针内固定术
835	D07儿童骨科、骨盆外科	2020-12-29	2021-01-09	3056715	陈宣余	男	11Y	股骨骨折		治愈	张敬东	易先宏	李玉安	股骨骨折切开复位钢针内固定术
836	D07儿童骨科、骨盆外科	2020-12-30	2021-01-09	3056720	石庆淑	女	10Y	股骨骨折	特指手术随诊医疗	治愈	张敬东	易先宏	李玉安	股骨骨折切开复位髓内针内固定术;股骨内固定物取出术
837	D07儿童骨科、骨盆外科	2020-12-24	2021-01-09	3056724	李茂华	男	30Y	开放性胫腓骨干骨折	前列腺结石	治愈	孔建中	翁益民	柯陈荣	胫骨骨折切开复位钢针内固定术
838	D07儿童骨科、骨盆外科	2021-01-02	2021-01-09	3056726	孙培帅	男	2Y	股骨干骨折		治愈	张敬东	易先宏	李玉安	股骨骨折闭合复位术;石膏绷带固定
839	D07儿童骨科、骨盆外科	2021-01-01	2021-01-09	3056743	黄珂玥	女	3Y	肱骨外髁骨折	前臂神经损伤;前臂血管损伤	治愈	张敬东	易先宏	李玉安	肱骨骨折切开复位钢针内固定术
840	D07儿童骨科、骨盆外科	2020-12-28	2021-01-09	3056911	陈国麟	男	58Y	胫腓骨闭合性骨折	脂肪肝;髌骨骨折;前列腺结石;胆囊肥大;2型糖尿病;单纯性肾囊肿;胆囊结石	治愈	孔建中	翁益民	柯陈荣	胫骨骨折切开复位钢板内固定术
841	D07儿童骨科、骨盆外科	2021-01-05	2021-01-10	3057017	王诗涵	女	9Y	锁骨骨折		治愈	张敬东	易先宏	李玉安	锁骨骨折切开复位钢针内固定术
842	D07儿童骨科、骨盆外科	2020-12-27	2021-01-10	3057040	陈彩妹	女	84Y	股骨粗隆间骨折	高血压病;下肢动脉粥样硬化	治愈	孔建中	孔建中	陈墨川	股骨骨折闭合复位钢针内固定术
843	D07儿童骨科、骨盆外科	2021-01-01	2021-01-10	3057042	汪繁洲	男	20Y	外踝骨折		治愈	孔建中	孔建中	陈墨川	踝关节骨折切开复位钢针内固定术
844	D07儿童骨科、骨盆外科	2020-12-29	2021-01-10	3057183	翁光轩	男	7Y	股骨干骨折		治愈	张敬东	易先宏	方明桥	股骨骨折闭合复位钢针内固定术
845	D07儿童骨科、骨盆外科	2021-01-08	2021-01-11	3057431	吴雅婷	女	3Y	跟骨骨折	肺挫伤	好转	张敬东	易先宏	王伟
846	D07儿童骨科、骨盆外科	2021-01-06	2021-01-11	3057432	邢十友	男	9Y	肱骨髁上骨折	神经源性膀胱;特指手术后状态;先天性足畸形;上肢神经损伤	治愈	张敬东	易先宏	王伟	肱骨骨折闭合复位钢针内固定术
847	D07儿童骨科、骨盆外科	2021-01-06	2021-01-11	3057434	郑永鹏	男	3Y	肱骨外髁骨折		治愈	张敬东	易先宏	王伟	肱骨骨折切开复位钢针内固定术
848	D07儿童骨科、骨盆外科	2021-01-07	2021-01-11	3057438	林洁	女	4Y	肱骨外髁骨折		好转	张敬东	易先宏	闫广奎	肱骨骨折切开复位钢针内固定术
849	D07儿童骨科、骨盆外科	2021-01-08	2021-01-11	3057439	吉晓	女	3Y	取除骨折内固定装置		其他	张敬东	易先宏	王伟	股骨内固定物取出术
850	D07儿童骨科、骨盆外科	2020-12-26	2021-01-11	3057440	叶凤香	女	87Y	股骨粗隆间骨折	肺部感染;下肢动脉粥样硬化;胸腔积液;骨质疏松;后天性肾囊肿;耻骨骨折	治愈	孔建中	翁益民	柯陈荣	股骨骨折切开复位钢针内固定术
851	D07儿童骨科、骨盆外科	2020-12-31	2021-01-11	3057557	林玉和	女	71Y	肱骨外科颈骨折	肾超声检查异常;2型糖尿病;肩袖损伤;脂肪肝;肾错构瘤	治愈	孔建中	陈墨川	陈墨川	肱骨骨折切开复位钢针内固定术
852	D07儿童骨科、骨盆外科	2020-12-28	2021-01-11	3057560	张生	男	11Y	跖骨骨折	骰骨骨折;楔状骨骨折(足);跖骨脱位	治愈	张敬东	易先宏	李玉安	跖关节脱位闭合复位术;跖骨骨折切开复位钢板内固定术
853	D07儿童骨科、骨盆外科	2020-12-31	2021-01-11	3057561	郑月连	女	84Y	股骨粗隆间骨折	下肢动脉粥样硬化;2型糖尿病;后天性肾囊肿;高血压病	治愈	孔建中	孔建中	陈墨川	股骨骨折闭合复位钢针内固定术
854	D07儿童骨科、骨盆外科	2020-12-31	2021-01-11	3057567	李忠华	男	37Y	胫腓骨闭合性骨折	后天性肾囊肿;指骨骨折;特指手术后状态	治愈	孔建中	孔建中	陈墨川	胫骨骨折切开复位钢针内固定术
855	D07儿童骨科、骨盆外科	2020-12-31	2021-01-11	3057568	王冕	男	37Y	胫腓骨下端骨折	脂肪肝	治愈	孔建中	陈墨川	陈墨川	胫骨骨折切开复位钢针内固定术;腓骨骨折切开复位髓内针内固定术
856	D07儿童骨科、骨盆外科	2020-12-27	2021-01-11	3057571	胡佳乐	女	12Y	三踝骨折		治愈	翁益民	翁益民	柯陈荣	踝关节骨折切开复位钢针内固定术
857	D07儿童骨科、骨盆外科	2021-01-08	2021-01-12	3057778	朱凯诚	男	12Y	锁骨骨折		治愈	张敬东	易先宏	方明桥	锁骨骨折切开复位钢针内固定术
858	D07儿童骨科、骨盆外科	2021-01-11	2021-01-13	3058025	黄国燊	男	7Y	肱骨髁上骨折		治愈	张敬东	易先宏	李玉安	肱骨骨折闭合复位钢针内固定术
859	D07儿童骨科、骨盆外科	2021-01-10	2021-01-13	3058136	曹轩	男	4Y	肱骨外髁骨折		治愈	张敬东	易先宏	闫广奎	肱骨骨折切开复位钢针内固定术
860	D07儿童骨科、骨盆外科	2021-01-04	2021-01-13	3058141	姚池	男	6Y	胫腓骨下端骨折		治愈	张敬东	易先宏	李玉安	胫骨骨折闭合复位螺钉内固定术;腓骨骨折切开复位钢针内固定术
861	D07儿童骨科、骨盆外科	2021-01-09	2021-01-13	3058153	陈呈轩	男	6Y	取除骨折内固定装置		其他	张敬东	易先宏	李玉安	胫骨内固定物取出术
862	D07儿童骨科、骨盆外科	2021-01-06	2021-01-13	3058251	严炳延	男	57Y	跖骨骨折	足部皮肤撕裂伤;特指趾骨骨折;踝和足水平肌肉和肌腱损伤;踝和足水平特指血管损伤;踝和足水平特指神经损伤;坏疽	治愈	翁益民	翁益民	柯陈荣	皮肤和皮下坏死组织切除清创术;足肌腱成形术;跖骨骨折切开复位钢针内固定术;趾骨骨折切开复位钢针内固定术
863	D07儿童骨科、骨盆外科	2021-01-03	2021-01-13	3058344	邵美丽	女	58Y	鹰嘴骨折	高血压病;脂肪肝;继发性甲状腺功能减退症;2型糖尿病	治愈	孔建中	孔建中	陈墨川	尺骨骨折切开复位钢针内固定术
864	D07儿童骨科、骨盆外科	2021-01-01	2021-01-13	3058401	谷凤蓝	女	56Y	肱骨上端骨折	高血压病;脂肪肝;2型糖尿病	治愈	孔建中	孔建中	陈墨川	肱骨骨折切开复位钢针内固定术
865	D07儿童骨科、骨盆外科	2021-01-05	2021-01-13	3058403	陈爱芬	女	54Y	肱骨骨折	脂肪肝;高血压病;2型糖尿病	治愈	孔建中	孔建中	陈墨川	肱骨植骨术;肱骨骨折切开复位钢板内固定术
866	D07儿童骨科、骨盆外科	2021-01-09	2021-01-14	3058733	李守豪	男	7Y	取除骨折内固定装置		其他	张敬东	易先宏	李玉安	胫骨内固定物取出术
867	D07儿童骨科、骨盆外科	2021-01-10	2021-01-14	3058741	沈律呈	男	7Y	取除骨折内固定装置		其他	张敬东	易先宏	方明桥	股骨内固定物取出术
868	D07儿童骨科、骨盆外科	2021-01-11	2021-01-14	3058774	汤芷欣	女	7Y	取除骨折内固定装置		其他	张敬东	易先宏	李玉安	股骨内固定物取出术
869	D07儿童骨科、骨盆外科	2021-01-11	2021-01-16	3059073	吴芯媛	女	1Y	肱骨髁上骨折		治愈	张敬东	易先宏	李玉安	肱骨骨折切开复位钢针内固定术
870	D07儿童骨科、骨盆外科	2021-01-09	2021-01-16	3059078	马成博	男	7Y	桡骨下端骨折		治愈	张敬东	易先宏	李玉安	桡骨骨折切开复位钢针内固定术
871	D07儿童骨科、骨盆外科	2021-01-09	2021-01-16	3059082	韩鑫	女	10Y	距骨骨折		治愈	张敬东	易先宏	李玉安	胫骨骨折闭合复位螺钉内固定术
872	D07儿童骨科、骨盆外科	2021-01-10	2021-01-16	3059083	林梓涵	男	6Y	肱骨外髁骨折		治愈	张敬东	易先宏	李玉安	肱骨骨折闭合复位钢针内固定术
873	D07儿童骨科、骨盆外科	2020-12-20	2021-01-16	3059176	石华品	男	34Y	胫腓骨干骨折	癫痫;脂肪肝	治愈	孔建中	孔建中	陈墨川	胫骨骨折切开复位钢针内固定术
874	D07儿童骨科、骨盆外科	2021-01-07	2021-01-16	3059182	汪花翠	女	85Y	股骨粗隆间骨折	高血压病;人工膝关节;特指手术后状态	治愈	孔建中	翁益民	柯陈荣	股骨骨折闭合复位髓内针内固定术
875	D07儿童骨科、骨盆外科	2021-01-06	2021-01-16	3059184	余仕赞	男	51Y	跟骨骨折	前列腺结石;特指骨囊肿	治愈	翁益民	翁益民	柯陈荣	跟骨骨折闭合复位钢针内固定术
876	D07儿童骨科、骨盆外科	2021-01-08	2021-01-16	3059258	吴爱菊	女	80Y	股骨粗隆间骨折	高血压病;陈旧性股骨颈骨折;后天性肾囊肿	治愈	孔建中	孔建中	陈墨川	股骨钢板内固定术
877	D07儿童骨科、骨盆外科	2021-01-11	2021-01-17	3059537	厉振军	男	17Y	股骨颈骨折		治愈	孔建中	孔建中	陈墨川	股骨骨折闭合复位钢针内固定术
878	D07儿童骨科、骨盆外科	2021-01-14	2021-01-17	3059561	蔡凯雨	男	12Y	取除骨折内固定装置		其他	张敬东	易先宏	王伟	桡骨内固定物取出术
879	D07儿童骨科、骨盆外科	2021-01-16	2021-01-18	3059826	张瑞妮	女	3Y	肱骨内髁骨折	桡骨头骨折	好转	张敬东	易先宏	李玉安
880	D07儿童骨科、骨盆外科	2021-01-13	2021-01-18	3059878	纪梦	女	9Y	取除骨折内固定装置		其他	张敬东	易先宏	李玉安	肱骨内固定物取出术
881	D07儿童骨科、骨盆外科	2021-01-13	2021-01-18	3059883	方一航	男	9Y	取除骨折内固定装置		其他	张敬东	易先宏	李玉安	胫骨内固定物取出术
882	D07儿童骨科、骨盆外科	2021-01-05	2021-01-18	3059980	丁宗权	男	74Y	股骨粗隆间骨折	脂肪肝;下肢动脉粥样硬化	治愈	翁益民	翁益民	柯陈荣	股骨骨折闭合复位钢针内固定术
883	D07儿童骨科、骨盆外科	2021-01-18	2021-01-19	3060217	吴仁浩	男	1Y	肱骨外髁骨折		未愈	张敬东	易先宏	方明桥
884	D07儿童骨科、骨盆外科	2021-01-15	2021-01-19	3060229	孙雷斯苗	女	4Y	胫骨骨折		好转	张敬东	易先宏	李玉安
885	D07儿童骨科、骨盆外科	2021-01-16	2021-01-19	3060249	戴景浩	男	6Y	取除骨折内固定装置		其他	张敬东	易先宏	李玉安	胫骨内固定物取出术
886	D07儿童骨科、骨盆外科	2021-01-06	2021-01-19	3060289	杨秀花	女	50Y	跟骨骨折	下肢静脉血栓形成	治愈	孔建中	孔建中	陈墨川	跟骨骨折切开复位钢板内固定术;皮肤和皮下组织非切除性清创;跟骨植骨术
887	D07儿童骨科、骨盆外科	2020-12-31	2021-01-19	3060415	吴国建	男	31Y	腰椎骨折	三踝骨折;跟骨骨折;麻痹[瘫痪]综合征;肱骨骨折	治愈	孔建中	陈墨川	陈墨川	肱骨骨折切开复位钢针内固定术;后入路腰椎融合术;腰椎椎板切除减压术;踝关节骨折切开复位钢针内固定术;跟骨骨折切开复位钢板内固定术;肱骨骨折切开复位钢板内固定术;皮肤和皮下组织非切除性清创;跟骨植骨术
888	D07儿童骨科、骨盆外科	2021-01-16	2021-01-20	3060831	程杨磊	男	2Y	肱骨外髁骨折		好转	张敬东	易先宏	王伟	肱骨骨折切开复位钢针内固定术
889	D07儿童骨科、骨盆外科	2021-01-14	2021-01-20	3060836	李松泽	男	12Y	取除骨折内固定装置		其他	张敬东	易先宏	王伟	股骨内固定物取出术
890	D07儿童骨科、骨盆外科	2021-01-11	2021-01-20	3060840	张恒信	男	46Y	锁骨骨折	脂肪肝	治愈	孔建中	孔建中	陈墨川	锁骨骨折切开复位钢针内固定术
891	D07儿童骨科、骨盆外科	2021-01-14	2021-01-20	3060843	陈烨	男	11Y	胫腓骨闭合性骨折		治愈	孔建中	孔建中	陈墨川	胫骨骨折闭合复位术;腓骨骨折切开复位髓内针内固定术
892	D07儿童骨科、骨盆外科	2021-01-06	2021-01-20	3060875	郑忠新	男	48Y	股骨粗隆间骨折	开放性多发性损伤;股骨干骨折;跟骨骨折	治愈	孔建中	孔建中	陈墨川	股骨骨折闭合复位髓内针内固定术;跟骨植骨术;股骨骨折闭合复位术;关节软骨修复术;跟骨骨折切开复位钢板内固定术
893	D07儿童骨科、骨盆外科	2021-01-14	2021-01-20	3060884	章华甲	男	43Y	膝关节副韧带扭伤	膝关节十字韧带扭伤;膝内侧半月板损伤;掌骨骨折	治愈	孔建中	孔建中	陈墨川	副韧带修补术;膝关节镜下半月板成形术
894	D07儿童骨科、骨盆外科	2020-10-20	2021-01-20	3060909	邓梦柠	女	9Y	截断术残端感染	急性创伤性胰腺炎，轻症;会阴损伤;坏疽;急性失血性贫血;重度营养不良伴消瘦;髋臼骨折;下肢神经损伤;股骨颈骨折;骨盆骨折;髂骨骨折;耻骨骨折;坠积性肺炎;胸腔积液;髋和大腿水平股静脉损伤;腹膜出血;股动脉损伤;骨筋膜室综合征	治愈	张敬东	易先宏	李玉安	皮肤和皮下坏死组织切除清创术;足血管、神经、肌腱探查术;大腿离断术;残端皮肤修整术;股静脉缝合术
895	D07儿童骨科、骨盆外科	2021-01-09	2021-01-20	3060928	朱小微	女	51Y	髌骨骨折	脂肪肝;高血压病	治愈	余可和	余可和	应晓洲	髌骨骨折切开复位张力带钢丝内固定术
896	D07儿童骨科、骨盆外科	2021-01-16	2021-01-20	3060987	陈锦杰	男	13Y	取除骨折内固定装置		其他	张敬东	易先宏	方明桥	桡骨内固定物取出术
897	D07儿童骨科、骨盆外科	2021-01-10	2021-01-21	3061258	郑陈红	女	65Y	桡骨下端骨折	下肢动脉粥样硬化;脂肪肝	治愈	孔建中	孔建中	陈墨川	桡骨骨折切开复位钢针内固定术;关节软骨修复术
898	D07儿童骨科、骨盆外科	2021-01-16	2021-01-21	3061261	周知博	男	5Y	取除骨折内固定装置		其他	张敬东	易先宏	李玉安	胫骨内固定物取出术
899	D07儿童骨科、骨盆外科	2021-01-11	2021-01-21	3061264	王少明	男	52Y	股骨粗隆间骨折	腹股沟淋巴结肿大;脂肪瘤;前列腺结石;背部肿物	治愈	孔建中	孔建中	陈墨川	股骨骨折闭合复位髓内针内固定术
900	D07儿童骨科、骨盆外科	2021-01-11	2021-01-21	3061273	缪红钗	女	53Y	闭合性胫骨平台骨折	肾结石;胆囊息肉	治愈	孔建中	孔建中	陈墨川	胫骨骨折切开复位钢针内固定术;关节软骨修复术;胫骨植骨术;膝关节半月板成形术
901	D07儿童骨科、骨盆外科	2021-01-21	2021-01-21	3061436	黄景涛	男	12Y	桡骨骨折		好转	张敬东	易先宏	李玉安
902	D07儿童骨科、骨盆外科	2021-01-16	2021-01-22	3061494	潘若兮	女	9Y	股骨下端骨折		治愈	张敬东	易先宏	李玉安	股骨骨折闭合复位钢针内固定术
903	D07儿童骨科、骨盆外科	2021-01-19	2021-01-22	3061496	高依蕊	女	12Y	取除骨折内固定装置		其他	张敬东	易先宏	李玉安	胫骨内固定物取出术
904	D07儿童骨科、骨盆外科	2021-01-18	2021-01-22	3061501	陈政	男	12Y	取除骨折内固定装置	瘢痕	其他	张敬东	易先宏	方明桥	瘢痕松解术;股骨内固定物取出术
905	D07儿童骨科、骨盆外科	2021-01-19	2021-01-22	3061504	杨子赫	男	6Y	取除骨折内固定装置		其他	张敬东	易先宏	方明桥	尺骨内固定物取出术
906	D07儿童骨科、骨盆外科	2021-01-18	2021-01-22	3061506	黄良健	男	6Y	取除骨折内固定装置		其他	张敬东	易先宏	李玉安	胫骨内固定物取出术
907	D07儿童骨科、骨盆外科	2021-01-18	2021-01-22	3061508	郑德	男	9Y	取除骨折内固定装置		其他	张敬东	易先宏	李玉安	肱骨内固定物取出术
908	D07儿童骨科、骨盆外科	2021-01-19	2021-01-22	3061510	谷明乐	男	10Y	取除骨折内固定装置		其他	张敬东	易先宏	方明桥	锁骨内固定物取出术
909	D07儿童骨科、骨盆外科	2021-01-05	2021-01-22	3061514	叶玉飞	女	72Y	股骨颈骨折	下肢动脉粥样硬化;高血压病;脑卒中后遗症	治愈	翁益民	翁益民	柯陈荣	人工股骨头置换术
910	D07儿童骨科、骨盆外科	2021-01-17	2021-01-22	3061522	赵燕菊	女	5Y	取除骨折内固定装置		其他	张敬东	易先宏	李玉安	股骨内固定物取出术
911	D07儿童骨科、骨盆外科	2021-01-11	2021-01-22	3061587	刘百理	男	48Y	胫腓骨干骨折	下肢动脉粥样硬化;脂肪肝;多发性上肢伴下肢浅表损伤;创伤性硬膜外出血;慢性上颌窦炎;足舟状骨骨折;额骨骨折;副脾;腰椎峡部裂;前列腺结石;脊柱侧弯	治愈	孔建中	孔建中	陈墨川	胫骨骨折切开复位钢板内固定术;腓骨骨折闭合复位髓内针内固定术
912	D07儿童骨科、骨盆外科	2021-01-11	2021-01-22	3061588	王美英	女	71Y	闭合性胫骨平台骨折	膝关节软骨撕裂，近期的;胆囊结石;高血压病;脂肪肝;糖尿病;半月板撕裂，近期的	治愈	孔建中	孔建中	陈墨川	胫骨植骨术;胫骨骨折切开复位钢针内固定术;关节软骨修复术;膝关节半月板成形术
913	D07儿童骨科、骨盆外科	2021-01-10	2021-01-22	3061723	叶海红	女	38Y	胫骨骨折		治愈	孔建中	孔建中	陈墨川	胫骨骨折切开复位钢针内固定术
914	D07儿童骨科、骨盆外科	2021-01-17	2021-01-23	3061945	杨慧怡	女	9Y	取除骨折内固定装置	上肢肌肉和肌腱损伤后遗症	其他	张敬东	易先宏	王伟	伸指肌腱缝合术;尺骨内固定物取出术
915	D07儿童骨科、骨盆外科	2021-01-11	2021-01-23	3061950	陈爱香	女	57Y	肱骨上端骨折	肝回声不均;肝血管瘤;肝囊肿	治愈	孔建中	孔建中	陈墨川	肱骨骨折切开复位钢针内固定术;肩袖修补术
916	D07儿童骨科、骨盆外科	2021-01-18	2021-01-23	3061952	金博涛	男	13Y	踝骨闭合性骨折	踝关节脱位	治愈	孔建中	孔建中	陈墨川	踝关节骨折切开复位钢针内固定术
917	D07儿童骨科、骨盆外科	2021-01-11	2021-01-23	3061957	叶彩芬	女	53Y	锁骨骨折	腰骶部脊柱骨折;骶骨骨折;耻骨骨折	治愈	孔建中	孔建中	陈墨川	锁骨骨折切开复位钢针内固定术
918	D07儿童骨科、骨盆外科	2020-12-15	2021-01-23	3062019	张爱林	男	53Y	开放性胫腓骨干骨折	股骨特指部位骨折;锁骨骨折;小腿水平特指肌腱损伤;小腿浅表损伤;2型糖尿病;特指手术后状态;髋臼骨折;髌骨骨折;股骨骨折;开放性多发性损伤	治愈	翁益民	翁益民	柯陈荣	胫骨骨折切开复位钢板内固定术;髌骨骨折切开复位张力带钢丝内固定术;股骨骨折切开复位钢板内固定术;皮肤和皮下坏死组织切除清创术;股骨植骨术
919	D07儿童骨科、骨盆外科	2021-01-22	2021-01-24	3062353	章国涵	男	6Y	取除骨折内固定装置		其他	张敬东	易先宏	方明桥	肱骨内固定物取出术
920	D07儿童骨科、骨盆外科	2021-01-17	2021-01-24	3062354	陈泊言	男	6Y	胫骨骨折		治愈	张敬东	易先宏	方明桥	胫骨骨折闭合复位髓内针内固定术
921	D07儿童骨科、骨盆外科	2021-01-22	2021-01-24	3062356	吴俊良	男	10Y	取除骨折内固定装置		其他	张敬东	易先宏	方明桥	尺骨内固定物取出术
922	D07儿童骨科、骨盆外科	2021-01-20	2021-01-24	3062358	罗栩	男	8Y	取除骨折内固定装置		其他	张敬东	易先宏	李玉安	桡骨内固定物取出术
923	D07儿童骨科、骨盆外科	2020-12-31	2021-01-24	3062359	董史池	男	32Y	跟骨骨折	腰椎骨折;胸椎骨折;足舟骨脱位;胫骨下端骨折;足舟状骨骨折;腓骨骨折	治愈	孔建中	陈墨川	陈墨川	后入路胸腰椎融合术;跟骨骨折切开复位钢针内固定术;关节软骨修复术;跟骨植骨术;跗跖关节脱位切开复位术;跟骨骨折切开复位钢板内固定术
924	D07儿童骨科、骨盆外科	2021-01-20	2021-01-24	3062361	陈奥	男	8Y	取除骨折内固定装置		其他	张敬东	易先宏	李玉安	跗骨内固定物取出术
925	D07儿童骨科、骨盆外科	2021-01-07	2021-01-24	3062365	刘光美	男	58Y	胫骨骨折	高血压病;单关节炎;2型糖尿病;多处挫伤;股骨粗隆间骨折;肺部感染;胸腔积液;支气管扩张	治愈	翁益民	翁益民	柯陈荣	股骨骨折切开复位钢针内固定术;胫骨骨折切开复位钢针内固定术
926	D07儿童骨科、骨盆外科	2021-01-20	2021-01-24	3062367	何俞莹	女	11Y	取除骨折内固定装置	肥厚性瘢痕	其他	张敬东	易先宏	方明桥	瘢痕松解术;髌骨内固定物取出术
927	D07儿童骨科、骨盆外科	2021-01-20	2021-01-25	3062851	陈莹	女	14Y	取除骨折内固定装置		其他	张敬东	易先宏	李玉安	髋关节内固定物取出术
928	D07儿童骨科、骨盆外科	2021-01-20	2021-01-25	3062860	彭盛博	男	13Y	取除骨折内固定装置		其他	张敬东	易先宏	李玉安	胫骨内固定物取出术
929	D07儿童骨科、骨盆外科	2021-01-20	2021-01-25	3062865	胡思雅	女	11Y	取除骨折内固定装置	髋关节强硬	其他	张敬东	易先宏	李玉安	瘢痕松解术;髋关节内固定物取出术
930	D07儿童骨科、骨盆外科	2021-01-19	2021-01-25	3062875	王登辉	男	10Y	尺骨桡骨闭合性骨折		治愈	张敬东	易先宏	李玉安	桡骨骨折闭合复位钢针内固定术
931	D07儿童骨科、骨盆外科	2021-01-21	2021-01-25	3062880	李之霖	男	4Y	指骨骨折	腕和手水平肌肉和肌腱损伤;手指挫伤伴指甲损害	治愈	张敬东	易先宏	李玉安	指骨骨折切开复位钢针内固定术;皮肤和皮下组织非切除性清创;甲成形术
932	D07儿童骨科、骨盆外科	2021-01-20	2021-01-25	3062883	高香福	男	51Y	取除骨折内固定装置	脂肪肝;肝血管瘤	其他	翁益民	翁益民	柯陈荣	胫骨内固定物取出术
933	D07儿童骨科、骨盆外科	2021-01-21	2021-01-25	3062888	王奉凯	男	13Y	取除骨折内固定装置	肘关节粘连	其他	张敬东	易先宏	李玉安	肱骨内固定物取出术
934	D07儿童骨科、骨盆外科	2021-01-24	2021-01-25	3062894	郑文镪	男	3Y	胫骨骨折		好转	张敬东	易先宏	李玉安
935	D07儿童骨科、骨盆外科	2021-01-20	2021-01-25	3063207	林飞跃	男	16Y	取除骨折内固定装置	特指心律失常;室性早搏;房性早搏	其他	翁益民	翁益民	柯陈荣	胫骨内固定物取出术
936	D07儿童骨科、骨盆外科	2021-01-25	2021-01-25	3063215	陈世杰	男	2Y	肱骨髁上骨折	神经损伤	好转	张敬东	易先宏	李玉安
937	D07儿童骨科、骨盆外科	2021-01-22	2021-01-26	3061760	王柏栋	男	9Y	取除骨折内固定装置		其他	张敬东	易先宏	王伟	尺骨内固定物取出术
938	D07儿童骨科、骨盆外科	2021-01-23	2021-01-26	3063373	冯星星	男	5Y	肱骨外髁骨折		治愈	张敬东	易先宏	李玉安	肱骨骨折切开复位钢针内固定术
939	D07儿童骨科、骨盆外科	2021-01-10	2021-01-26	3063374	金思佚	女	13Y	踝骨闭合性骨折	跟骨骨折	治愈	张敬东	易先宏	李玉安	踝关节骨折切开复位钢针内固定术
940	D07儿童骨科、骨盆外科	2021-01-15	2021-01-26	3063379	程成达	男	87Y	髌骨骨折	前列腺增生;肾错构瘤	治愈	翁益民	翁益民	柯陈荣	髌骨骨折切开复位螺钉内固定术
941	D07儿童骨科、骨盆外科	2021-01-15	2021-01-26	3063388	林大庆	男	47Y	股骨粗隆下骨折	前列腺结石;乙型肝炎小三阳	治愈	翁益民	翁益民	柯陈荣	股骨骨折闭合复位钢针内固定术
942	D07儿童骨科、骨盆外科	2021-01-16	2021-01-26	3063392	王道勇	男	52Y	闭合性胫骨平台骨折	高血压病;乙型肝炎小三阳;腓骨骨折;脂肪肝;肝囊肿	治愈	翁益民	翁益民	柯陈荣	胫骨骨折切开复位钢针内固定术
943	D07儿童骨科、骨盆外科	2021-01-21	2021-01-26	3063395	郑岳春	男	65Y	锁骨骨折	肋骨骨折;高血压病	治愈	孔建中	孔建中	陈墨川	锁骨骨折切开复位钢针内固定术
944	D07儿童骨科、骨盆外科	2021-01-23	2021-01-27	3064018	周丽莎	女	4Y	桡骨颈骨折	尺骨桡骨闭合性骨折;头部外伤;肱骨外髁骨折;桡骨下端骨折	治愈	张敬东	易先宏	方明桥	桡骨骨折切开复位钢针内固定术
945	D07儿童骨科、骨盆外科	2021-01-22	2021-01-27	3064019	翁逸群	男	10Y	胫腓骨干骨折		治愈	张敬东	易先宏	方明桥	胫骨骨折闭合复位髓内针内固定术
946	D07儿童骨科、骨盆外科	2021-01-27	2021-01-30	3064331	何晨伟	男	9Y	肱骨髁上骨折		治愈	张敬东	易先宏	王伟	肱骨骨折闭合复位钢针内固定术
947	D07儿童骨科、骨盆外科	2021-01-20	2021-01-30	3064382	翁成钗	女	58Y	三踝骨折		治愈	孔建中	孔建中	陈墨川	关节软骨修复术;踝关节骨折切开复位钢针内固定术
948	D07儿童骨科、骨盆外科	2021-01-21	2021-01-30	3064383	谢香妹	女	86Y	股骨颈骨折	下肢动脉粥样硬化	治愈	孔建中	孔建中	陈墨川	人工股骨头置换术
949	D07儿童骨科、骨盆外科	2021-01-22	2021-01-30	3064384	方光张	男	48Y	闭合性胫骨平台骨折	下肢静脉血栓形成	治愈	孔建中	孔建中	陈墨川	胫骨骨折切开复位钢针内固定术;胫骨植骨术;关节软骨修复术
950	D07儿童骨科、骨盆外科	2021-01-21	2021-01-30	3064385	章招翠	女	84Y	股骨颈骨折	单纯性肾囊肿;下肢静脉曲张	治愈	孔建中	孔建中	陈墨川	全髋关节置换术
951	D07儿童骨科、骨盆外科	2021-01-28	2021-01-31	3064447	单思彤	女	7Y	肱骨髁上骨折		治愈	张敬东	易先宏	闫广奎	肱骨骨折闭合复位钢针内固定术
952	D07儿童骨科、骨盆外科	2021-01-22	2021-02-01	3064549	郑长泉	男	9Y	股骨干骨折		治愈	张敬东	易先宏	王伟	股骨骨折切开复位钢针内固定术
953	D07儿童骨科、骨盆外科	2021-01-27	2021-02-01	3064550	刘宇龙	男	8Y	开放性腕骨骨折	前臂特指屈肌和肌腱损伤;开放性手部损伤	治愈	张敬东	易先宏	毛诚晃	手部肌肉缝合术;腕骨间融合术
954	D07儿童骨科、骨盆外科	2021-01-24	2021-02-01	3064552	林长杰	男	6Y	胫腓骨下端骨折	腓骨骨折	治愈	张敬东	易先宏	方明桥	胫骨骨折闭合复位螺钉内固定术;腓骨骨折切开复位钢针内固定术
955	D07儿童骨科、骨盆外科	2021-01-24	2021-02-01	3064572	陈锡铭	男	80Y	插入矫形外科植入物后骨折	糖尿病;下肢动脉粥样硬化;高血压病;帕金森病	治愈	孔建中	孔建中	陈墨川	髋关节滑膜切除术;髋关节假体翻修术
956	D07儿童骨科、骨盆外科	2021-01-21	2021-02-01	3064580	邵永庆	男	48Y	尺骨桡骨骨干骨折	特指腕骨骨折;尺骨茎突骨折	治愈	孔建中	孔建中	陈墨川	尺骨骨折切开复位钢板内固定术;桡骨骨折切开复位钢板内固定术
957	D07儿童骨科、骨盆外科	2021-01-28	2021-02-02	3064659	杨思远	男	6Y	肱骨髁上骨折		治愈	张敬东	易先宏	方明桥	肱骨骨折闭合复位钢针内固定术
958	D07儿童骨科、骨盆外科	2021-01-31	2021-02-03	3064805	黄昕堯	男	3Y	指骨骨折	开放性手部损伤	治愈	张敬东	易先宏	毛诚晃	甲床清创术
959	D07儿童骨科、骨盆外科	2021-01-22	2021-02-03	3064830	夏纪梅	女	56Y	跟骨骨折		治愈	孔建中	孔建中	陈墨川	皮肤和皮下组织非切除性清创;跟骨植骨术;关节软骨修复术;跟骨骨折切开复位钢针内固定术
960	D07儿童骨科、骨盆外科	2021-01-20	2021-02-03	3064832	张秀鹏	男	26Y	闭合性胫骨平台骨折	膝关节十字韧带扭伤;膝关节副韧带扭伤	治愈	孔建中	孔建中	陈墨川	副韧带修补术
961	D07儿童骨科、骨盆外科	2021-01-25	2021-02-03	3064870	张建初	男	62Y	肱骨外科颈骨折	肝囊肿;前列腺结石;特指手术后状态;后天性肾囊肿	治愈	翁益民	翁益民	柯陈荣	肱骨骨折切开复位钢针内固定术
962	D07儿童骨科、骨盆外科	2021-01-25	2021-02-03	3064873	卢庆明	女	52Y	股骨颈骨折		治愈	翁益民	翁益民	柯陈荣	股骨骨折闭合复位钢针内固定术
963	D07儿童骨科、骨盆外科	2021-01-29	2021-02-03	3064982	符涵铭	男	4Y	尺骨骨折	桡骨头脱位	治愈	孔建中	孔建中	陈墨川	尺骨骨折切开复位钢板内固定术
964	D07儿童骨科、骨盆外科	2021-01-24	2021-02-04	3065029	叶龙妹	女	70Y	股骨颈骨折	腰椎退行性病变;胸椎退行性病变;心功能不全	治愈	孔建中	孔建中	陈墨川	全髋关节置换术;髋关节滑膜切除术
965	D07儿童骨科、骨盆外科	2021-01-17	2021-02-04	3065030	洪炳松	男	62Y	髋臼骨折	骨盆骨折;髂骨骨折;脂肪肝;胆囊息肉;肝囊肿;耻骨骨折	治愈	翁益民	翁益民	柯陈荣	骨盆骨折切开复位钢板内固定术
966	D07儿童骨科、骨盆外科	2021-02-02	2021-02-04	3065032	周敖诚	男	7Y	肱骨髁上骨折		治愈	张敬东	易先宏	方明桥	肱骨骨折闭合复位钢针内固定术
967	D07儿童骨科、骨盆外科	2021-01-29	2021-02-06	3065459	刘泽辉	男	7Y	肱骨外髁骨折		治愈	张敬东	易先宏	毛诚晃	肱骨骨折切开复位钢针内固定术
968	D07儿童骨科、骨盆外科	2021-01-09	2021-02-06	3065468	林玉寿	男	57Y	胫腓骨干骨折	特指手术后状态	治愈	孔建中	孔建中	陈墨川	胫骨骨折切开复位钢板内固定术;腓骨骨折闭合复位髓内针内固定术;腓骨植骨术
969	D07儿童骨科、骨盆外科	2021-01-29	2021-02-06	3065471	孙术涵	男	9Y	锁骨骨折		治愈	张敬东	易先宏	毛诚晃	锁骨骨折切开复位钢针内固定术
970	D07儿童骨科、骨盆外科	2021-01-17	2021-02-06	3065537	占永香	女	71Y	股骨颈骨折	肝囊肿;高血压病;脂肪肝	治愈	翁益民	翁益民	柯陈荣	全髋关节置换术
971	D07儿童骨科、骨盆外科	2021-01-24	2021-02-06	3065544	余秋娥	女	69Y	桡骨骨折	尺骨茎突骨折;2型糖尿病;特指手术后状态	治愈	翁益民	翁益民	柯陈荣	桡骨骨折切开复位钢板内固定术;腕关节脱位闭合复位术
972	D07儿童骨科、骨盆外科	2021-01-31	2021-02-06	3065686	廖浩博	男	8Y	锁骨骨折		治愈	张敬东	易先宏	毛诚晃	锁骨骨折切开复位钢针内固定术
973	D07儿童骨科、骨盆外科	2021-02-03	2021-02-07	3065791	黄贤达	男	60Y	取除骨折内固定装置	肾结石;前列腺结石;脂肪肝	其他	翁益民	翁益民	柯陈荣	锁骨内固定物取出术
974	D07儿童骨科、骨盆外科	2021-02-03	2021-02-08	3066138	欧阳正一	男	13Y	取除骨折内固定装置		其他	张敬东	易先宏	毛诚晃	锁骨内固定物取出术
975	D07儿童骨科、骨盆外科	2021-02-03	2021-02-08	3066140	彭思思	女	13Y	取除骨折内固定装置		其他	张敬东	易先宏	毛诚晃	肘关节假体取出术
976	D07儿童骨科、骨盆外科	2021-02-01	2021-02-08	3066184	周伊伊	女	3Y	胫骨骨折		好转	张敬东	易先宏	毛诚晃
977	D07儿童骨科、骨盆外科	2021-01-30	2021-02-08	3066204	杨洁	女	46Y	双踝骨折	脂肪肝;三角韧带断裂;踝关节半脱位;肝囊肿	治愈	孔建中	陈墨川	陈墨川	踝关节韧带修补术;踝关节脱位切开复位术;踝关节骨折切开复位钢针内固定术
978	D07儿童骨科、骨盆外科	2021-02-04	2021-02-08	3066207	朱相同	男	5Y	取除骨折内固定装置	后天性肘内翻	其他	张敬东	易先宏	毛诚晃	肱骨内固定物取出术
979	D07儿童骨科、骨盆外科	2021-01-30	2021-02-08	3066214	高岩汉	男	98Y	股骨骨折	下肢动脉粥样硬化;高血压病;哮喘	治愈	孔建中	陈墨川	陈墨川	股骨骨折闭合复位钢针内固定术
980	D07儿童骨科、骨盆外科	2021-02-02	2021-02-08	3066286	陈静雯	女	10Y	肱骨髁上骨折		治愈	张敬东	易先宏	方明桥	肱骨骨折切开复位钢针内固定术
981	D07儿童骨科、骨盆外科	2021-02-04	2021-02-09	3066403	宋涵宇	男	6Y	尺骨桡骨远端骨折		治愈	张敬东	易先宏	毛诚晃	尺骨骨折闭合复位钢针内固定术
982	D07儿童骨科、骨盆外科	2021-02-03	2021-02-09	3066404	林娜娜	女	14Y	取除骨折内固定装置	骨和关节软骨良性肿瘤	其他	易先宏	毛诚晃	毛诚晃	股骨内固定物取出术
983	D07儿童骨科、骨盆外科	2021-01-25	2021-02-09	3066407	李少美	女	61Y	闭合性胫骨平台骨折	腰椎骨折;耻骨骨折;脑梗死后遗症	治愈	孔建中	陈墨川	陈墨川	胫骨骨折切开复位钢针内固定术;关节软骨修复术;胫骨植骨术
984	D07儿童骨科、骨盆外科	2021-01-31	2021-02-09	3066409	徐爱弟	女	92Y	股骨粗隆间骨折	尺骨茎突骨折;桡骨下端骨折;后天性肾囊肿;肝钙化灶;下肢动脉粥样硬化;高血压病	治愈	孔建中	陈墨川	陈墨川	股骨骨折闭合复位髓内针内固定术
985	D07儿童骨科、骨盆外科	2021-01-30	2021-02-09	3066414	郑德情	男	58Y	髌骨骨折	痛风性关节炎;下肢动脉粥样硬化;高血压病;特指手术后状态;肋骨骨折;骨质破坏;脂肪肝	治愈	孔建中	陈墨川	陈墨川	膝关节滑膜切除术;髌骨骨折切开复位螺钉内固定术;股四头肌成形术;髌骨病损切除术
986	D07儿童骨科、骨盆外科	2021-02-06	2021-02-09	3066415	罗俊权	男	76Y	股骨颈骨折	下肢动脉粥样硬化;高血压病;阿尔茨海默病	未愈	孔建中	陈墨川	陈墨川
987	D07儿童骨科、骨盆外科	2021-02-03	2021-02-09	3066418	祁一城	男	7Y	取除骨折内固定装置		其他	张敬东	易先宏	毛诚晃	股骨内固定物取出术
988	D07儿童骨科、骨盆外科	2021-01-25	2021-02-10	3066896	郑丛翠	女	82Y	股骨粗隆间骨折	高血压病	治愈	翁益民	翁益民	柯陈荣	股骨骨折闭合复位钢针内固定术
989	D07儿童骨科、骨盆外科	2021-02-07	2021-02-10	3066899	朱婧婕	女	9Y	取除骨折内固定装置		其他	易先宏	王伟	毛诚晃	肱骨内固定物取出术
990	D07儿童骨科、骨盆外科	2021-02-04	2021-02-10	3066906	张展敏	男	30Y	股骨骨折	前列腺结石;肾结石;腓骨骨折;肋骨骨折	治愈	孔建中	陈墨川	陈墨川	石膏绷带固定;股骨骨折闭合复位钢针内固定术
991	D07儿童骨科、骨盆外科	2021-01-30	2021-02-10	3066914	张轩	男	4Y	胫骨骨折		治愈	易先宏	毛诚晃	毛诚晃	胫骨骨折切开复位髓内针内固定术
992	D07儿童骨科、骨盆外科	2021-02-06	2021-02-10	3066916	张雯丽	女	4Y	取除骨折内固定装置		其他	易先宏	闫广奎	毛诚晃	尺骨内固定物取出术
993	D07儿童骨科、骨盆外科	2021-01-31	2021-02-10	3066917	吴昊	男	7Y	上肢皮肤感染	指骨骨折	治愈	易先宏	毛诚晃	方明桥
994	D07儿童骨科、骨盆外科	2021-02-06	2021-02-10	3066919	黄家诚	男	3Y	取除骨折内固定装置		其他	易先宏	王伟	毛诚晃	股骨内固定物取出术
995	D07儿童骨科、骨盆外科	2021-02-04	2021-02-13	3067848	黄晟玮	男	12Y	胫腓骨下端骨折		治愈	易先宏	王伟	毛诚晃	腓骨骨折切开复位钢板内固定术
996	D07儿童骨科、骨盆外科	2021-02-09	2021-02-13	3067857	王孜晗	女	5Y	肱骨髁上骨折		治愈	张敬东	易先宏	毛诚晃	肱骨骨折闭合复位钢针内固定术
997	D07儿童骨科、骨盆外科	2021-02-06	2021-02-13	3067860	程柠檬	女	9Y	股骨颈骨折		治愈	易先宏	王伟	毛诚晃	股骨骨折闭合复位钢针内固定术
998	D07儿童骨科、骨盆外科	2021-02-02	2021-02-13	3067867	马陈聖	男	5Y	股骨干骨折	头皮血肿	治愈	张敬东	易先宏	毛诚晃	股骨骨折闭合复位钢针内固定术
999	D07儿童骨科、骨盆外科	2021-01-29	2021-02-13	3067871	鲁云达	男	15Y	闭合性胫骨平台骨折	小腿水平肌肉损伤;四头肌和肌腱损伤	治愈	易先宏	毛诚晃	方明桥	胫骨骨折切开复位钢针内固定术;下肢肌肉缝合术
1000	D07儿童骨科、骨盆外科	2021-02-07	2021-02-13	3067880	谢道川	男	72Y	肱骨上端骨折	高血压病;乙型肝炎小三阳	治愈	孔建中	孔建中	陈墨川	肱骨骨折切开复位钢针内固定术;肱骨植骨术
1001	D07儿童骨科、骨盆外科	2021-02-10	2021-02-13	3067889	林霜	女	18Y	股骨颈骨折		治愈	孔建中	孔建中	陈墨川	股骨骨折切开复位钢针内固定术
1002	D07儿童骨科、骨盆外科	2021-01-29	2021-02-13	3067966	叶佳城	男	12Y	胫腓骨下端骨折		治愈	张敬东	易先宏	毛诚晃	胫骨骨折切开复位钢针内固定术
1003	D07儿童骨科、骨盆外科	2021-02-07	2021-02-14	3068157	南彩荷	女	70Y	桡骨下端骨折	腕关节脱位	治愈	孔建中	孔建中	陈墨川	桡骨外固定架固定术
1004	D07儿童骨科、骨盆外科	2021-02-11	2021-02-15	3068600	汪慧娟	女	10Y	取除骨折内固定装置		其他	易先宏	易先宏	毛诚晃	肱骨内固定物取出术
1005	D07儿童骨科、骨盆外科	2021-02-10	2021-02-15	3068606	林博	男	5Y	取除骨折内固定装置		其他	易先宏	李玉安	毛诚晃	胫骨内固定物取出术
1006	D07儿童骨科、骨盆外科	2021-02-08	2021-02-15	3068610	倪淑静	女	3Y	肱骨外髁骨折		治愈	张敬东	易先宏	毛诚晃	肱骨骨折切开复位钢针内固定术
1007	D07儿童骨科、骨盆外科	2021-02-08	2021-02-15	3068612	郑永权	男	41Y	锁骨骨折	癫痫	治愈	孔建中	孔建中	陈墨川	锁骨骨折切开复位钢针内固定术
1008	D07儿童骨科、骨盆外科	2021-02-08	2021-02-15	3068617	吴桂英	女	90Y	股骨颈骨折	下肢动脉粥样硬化;后天性肾囊肿;慢性支气管炎	治愈	孔建中	孔建中	陈墨川	人工股骨头置换术
1009	D07儿童骨科、骨盆外科	2021-02-01	2021-02-16	3068894	王永棋	男	23Y	骨盆骨折	脊柱骨折;跟骨骨折	治愈	孔建中	孔建中	陈墨川	骨盆骨折切开复位钢板内固定术;跟骨骨折切开复位钢板内固定术;关节软骨修复术;跟骨植骨术;髋骨骨折切开复位钢板内固定术
1010	D07儿童骨科、骨盆外科	2021-02-05	2021-02-16	3068896	黄爱华	女	79Y	股骨颈骨折	下肢动脉粥样硬化;老年性脑萎缩;多发性脑梗死;额叶脑膜瘤	治愈	孔建中	孔建中	陈墨川	全髋关节置换术
1011	D07儿童骨科、骨盆外科	2021-02-08	2021-02-16	3068908	金容申	男	2Y	掌骨骨折	开放性手部损伤	治愈	张敬东	易先宏	毛诚晃	掌骨骨折切开复位钢针内固定术;皮肤和皮下组织非切除性清创
1012	D07儿童骨科、骨盆外科	2021-02-08	2021-02-16	3068910	汤明梅	女	80Y	股骨颈骨折	高血压病;后天性肾囊肿	治愈	孔建中	孔建中	陈墨川	全髋关节置换术
1013	D07儿童骨科、骨盆外科	2021-02-13	2021-02-17	3069302	黄肖灿	男	9Y	取除骨折内固定装置		其他	易先宏	李玉安	毛诚晃	股骨内固定物取出术
1014	D07儿童骨科、骨盆外科	2021-01-26	2021-02-17	3069305	倪子涵	男	5Y	股骨骨折	肱骨外科颈骨折;头皮血肿;头部多处浅表损伤;寰枢椎半脱位	治愈	张敬东	易先宏	毛诚晃	股骨骨折闭合复位钢针内固定术
1015	D07儿童骨科、骨盆外科	2021-02-09	2021-02-17	3069309	王秀花	女	50Y	耻骨骨折	乙肝表面抗原携带者;女性盆腔血肿	治愈	孔建中	孔建中	陈墨川	骨盆骨折闭合复位术
1016	D07儿童骨科、骨盆外科	2021-01-26	2021-02-17	3069314	郑达金	男	83Y	股骨骨折	胆囊息肉;前列腺增生;下肢动脉粥样硬化;膝关节病	治愈	翁益民	翁益民	柯陈荣	人工股骨头置换术
1017	D07儿童骨科、骨盆外科	2021-01-27	2021-02-17	3069316	张贤良	男	39Y	踝骨闭合性骨折	小腿损伤;乙型病毒性肝炎;肾结石;腓骨骨折;前列腺结石	治愈	翁益民	翁益民	柯陈荣	踝关节骨折切开复位钢针内固定术
1018	D07儿童骨科、骨盆外科	2021-01-31	2021-02-17	3069408	黄朱凤	女	51Y	锁骨骨折	肩胛骨骨折;子宫平滑肌瘤	治愈	孔建中	孔建中	陈墨川	锁骨骨折切开复位钢针内固定术;肩胛骨骨折切开复位钢针内固定术
1019	D07儿童骨科、骨盆外科	2021-02-08	2021-02-17	3069464	邹启平	男	53Y	锁骨骨折	后天性肾囊肿;头皮血肿;高血压病	治愈	孔建中	孔建中	陈墨川	锁骨植骨术;锁骨骨折切开复位钢针内固定术
1020	D07儿童骨科、骨盆外科	2021-02-07	2021-02-17	3069580	章芽香	女	62Y	取除骨折内固定装置	脂肪肝;下肢动脉粥样硬化;高血压病	其他	翁益民	翁益民	柯陈荣	胫骨内固定物取出术
1021	D07儿童骨科、骨盆外科	2021-02-13	2021-02-18	3069737	吴卓见	男	10Y	肱骨外科颈骨折		治愈	易先宏	李玉安	毛诚晃	肱骨骨折闭合复位钢针内固定术
1022	D07儿童骨科、骨盆外科	2021-02-14	2021-02-18	3069772	黄雷	男	5Y	取除骨折内固定装置		其他	易先宏	李玉安	毛诚晃	股骨内固定物取出术
1023	D07儿童骨科、骨盆外科	2021-02-10	2021-02-18	3069811	周亚设	男	1Y	股骨骨折		好转	张敬东	易先宏	毛诚晃	股骨骨折闭合复位钢针内固定术
1024	D07儿童骨科、骨盆外科	2021-02-17	2021-02-20	3070211	张宇成	男	6Y	肱骨髁上骨折		治愈	张敬东	易先宏	李玉安	肱骨骨折闭合复位钢针内固定术
1025	D07儿童骨科、骨盆外科	2021-02-04	2021-02-20	3070254	林春香	女	81Y	股骨颈骨折	下肢动脉粥样硬化;高血压病;膝关节病	治愈	翁益民	翁益民	柯陈荣	人工股骨头置换术
1026	D07儿童骨科、骨盆外科	2021-02-09	2021-02-20	3070256	戴晓芬	女	61Y	胫骨下端骨折	下肢动脉粥样硬化;肾结石;外踝骨折;脂肪肝;下肢静脉血栓形成	治愈	翁益民	翁益民	柯陈荣	踝关节骨折切开复位钢板内固定术;胫骨骨折切开复位螺钉内固定术
1027	D07儿童骨科、骨盆外科	2021-02-12	2021-02-20	3070273	李天意	男	12Y	髌骨骨折		治愈	张敬东	易先宏	毛诚晃	髌骨骨折切开复位螺钉内固定术
1028	D07儿童骨科、骨盆外科	2021-02-16	2021-02-20	3070277	郑瑾熙	男	9Y	取除骨折内固定装置		其他	张敬东	易先宏	毛诚晃	桡骨内固定物取出术
1029	D07儿童骨科、骨盆外科	2021-02-12	2021-02-20	3070279	杨钰莹	女	6Y	胫腓骨干骨折		治愈	张敬东	易先宏	毛诚晃	胫骨骨折切开复位钢针内固定术
1030	D07儿童骨科、骨盆外科	2021-02-15	2021-02-20	3070289	徐子铭	男	7Y	肱骨外髁骨折		治愈	张敬东	易先宏	毛诚晃	肱骨骨折切开复位钢针内固定术
1031	D07儿童骨科、骨盆外科	2021-02-16	2021-02-20	3070316	张招花	女	88Y	双踝骨折	高血压病;具有心脏起搏器	治愈	孔建中	孔建中	陈墨川	踝关节骨折切开复位钢针内固定术
1032	D07儿童骨科、骨盆外科	2021-02-09	2021-02-20	3070320	吴春弟	女	85Y	股骨颈骨折	下肢动脉粥样硬化	治愈	孔建中	孔建中	陈墨川	全髋关节置换术
1033	D07儿童骨科、骨盆外科	2021-02-10	2021-02-20	3070332	陈娇凤	女	73Y	股骨粗隆间骨折	后天性肾囊肿;肾结石;2型糖尿病;肝囊肿	治愈	孔建中	孔建中	陈墨川	股骨骨折切开复位钢针内固定术
1034	D07儿童骨科、骨盆外科	2021-01-21	2021-02-20	3070339	周昌盛	男	54Y	跟骨骨折	脂肪肝;胫距关节脱位;骰骨骨折;距骨骨折;前列腺结石	治愈	孔建中	孔建中	陈墨川	距骨骨折切开复位钢针内固定术;韧带修补术;距下关节融合术
1035	D07儿童骨科、骨盆外科	2021-02-14	2021-02-20	3070374	张五亩	女	78Y	肱骨上端骨折		治愈	孔建中	孔建中	陈墨川	肱骨骨折切开复位钢针内固定术;肩袖修补术
1036	D07儿童骨科、骨盆外科	2021-02-17	2021-02-20	3070480	周志高	男	1Y	肱骨髁上骨折		治愈	张敬东	易先宏	方明桥	肱骨骨折闭合复位钢针内固定术
1037	D07儿童骨科、骨盆外科	2021-02-14	2021-02-21	3070607	王倩倩	女	11Y	双踝骨折		治愈	张敬东	易先宏	毛诚晃	踝关节骨折闭合复位钢针内固定术;石膏绷带固定
1038	D07儿童骨科、骨盆外科	2021-02-14	2021-02-21	3070613	夏林灿	男	4Y	胫腓骨干骨折	多发性损伤	治愈	张敬东	易先宏	方明桥
1039	D07儿童骨科、骨盆外科	2021-02-10	2021-02-21	3070626	孙连生	男	81Y	股骨颈骨折	下肢动脉粥样硬化;后天性肾囊肿;腰椎骨折;前列腺结石;前列腺增生	治愈	孔建中	孔建中	陈墨川	全髋关节置换术
1040	D07儿童骨科、骨盆外科	2021-02-13	2021-02-22	3070938	李迎	女	1Y	股骨骨折		治愈	张敬东	易先宏	毛诚晃	股骨骨折闭合复位钢针内固定术
1041	D07儿童骨科、骨盆外科	2021-02-19	2021-02-22	3071052	蔡奕凡	男	2Y	肱骨髁上骨折		治愈	张敬东	易先宏	毛诚晃	肱骨骨折闭合复位钢针内固定术
1042	D07儿童骨科、骨盆外科	2021-02-05	2021-02-22	3071059	郑洁	男	41Y	股骨粗隆间骨折	高血压病;后天性肾囊肿;慢性乙型病毒性肝炎	治愈	翁益民	翁益民	柯陈荣	股骨骨折闭合复位钢针内固定术
1043	D07儿童骨科、骨盆外科	2021-02-14	2021-02-22	3071071	朱海英	女	39Y	髂骨骨折	髋关节积血;肝回声不均;后天性肾囊肿;耻骨骨折;肾钙化;肝血管瘤	治愈	孔建中	孔建中	陈墨川	髂骨骨折切开复位钢板内固定术;骨盆骨折闭合复位术
1044	D07儿童骨科、骨盆外科	2021-01-27	2021-02-22	3071084	周阳政	男	11Y	股骨骨折	开放性多发性损伤;肝损伤;面部挫伤;头皮裂伤;肺挫伤;肩关节脱位;肩胛骨骨折;肋骨骨折	治愈	张敬东	易先宏	毛诚晃	股骨骨折切开复位钢板内固定术;皮肤和皮下组织非切除性清创;皮肤和皮下坏死组织切除清创术
1045	D07儿童骨科、骨盆外科	2021-02-18	2021-02-22	3071093	张鸿	男	10Y	尺骨桡骨骨干骨折		治愈	孔建中	孔建中	陈墨川	尺骨骨折闭合复位钢针内固定术;桡骨骨折闭合复位钢针内固定术
1046	D07儿童骨科、骨盆外科	2021-02-16	2021-02-22	3071195	李云轩	男	2Y	胫腓骨下端骨折	隐睾;肺部感染;脑室扩张	治愈	张敬东	易先宏	毛诚晃	胫骨骨折闭合复位髓内针内固定术
1047	D07儿童骨科、骨盆外科	2021-02-16	2021-02-23	3071327	王聪	男	9Y	桡骨颈骨折		治愈	张敬东	易先宏	方明桥	桡骨骨折闭合复位钢针内固定术
1048	D07儿童骨科、骨盆外科	2021-02-13	2021-02-23	3071329	严月花	女	82Y	股骨粗隆间骨折	下肢动脉粥样硬化;盲，单眼;面部软组织挫伤;老年性脑萎缩;腔隙性脑梗死;单眼白内障;特指手术后状态;耻骨骨折;眶骨骨折;肾萎缩	治愈	翁益民	翁益民	柯陈荣	股骨骨折闭合复位髓内针内固定术
1049	D07儿童骨科、骨盆外科	2021-02-14	2021-02-24	3071679	张立言	男	7Y	取除骨折内固定装置		其他	张敬东	易先宏	毛诚晃	胫骨内固定物取出术
1050	D07儿童骨科、骨盆外科	2021-02-21	2021-02-24	3071681	杨晶晶	女	2Y	肱骨外髁骨折		治愈	张敬东	易先宏	毛诚晃	肱骨骨折切开复位钢针内固定术
1051	D07儿童骨科、骨盆外科	2021-02-20	2021-02-24	3071687	苗秀博	男	6Y	肱骨外髁骨折		治愈	张敬东	易先宏	毛诚晃	肱骨骨折切开复位钢针内固定术
1052	D07儿童骨科、骨盆外科	2021-02-15	2021-02-24	3071690	胡碎排	男	41Y	肱骨外科颈骨折	高血压病;2型糖尿病;肋骨骨折;肩袖损伤	治愈	孔建中	孔建中	陈墨川	肩袖修补术;肱骨骨折切开复位钢针内固定术
1053	D07儿童骨科、骨盆外科	2021-02-21	2021-02-25	3072174	李伟	男	44Y	取除骨折内固定装置	肾超声检查异常;脂肪肝;肾错构瘤	其他	翁益民	翁益民	柯陈荣	踝关节内固定物取出术
1054	D07儿童骨科、骨盆外科	2021-02-14	2021-02-27	3072491	叶蔡媚	女	78Y	闭合性胫骨平台骨折	脂肪肝	治愈	翁益民	翁益民	柯陈荣	胫骨骨折切开复位钢针内固定术;胫骨植骨术
1055	D07儿童骨科、骨盆外科	2021-02-14	2021-02-27	3072509	邵春贤	女	76Y	尺骨桡骨骨干骨折	尺桡关节脱位;颧骨骨折;肺部感染;蛛网膜下腔出血;脑卒中后遗症;高血压病;后天性肾囊肿;特指手术后状态	治愈	翁益民	翁益民	柯陈荣	桡骨骨折切开复位钢板内固定术;尺骨骨折切开复位钢板内固定术;尺桡关节脱位切开复位术
1056	D07儿童骨科、骨盆外科	2021-02-21	2021-02-27	3072524	叶宇彤	女	1Y	肱骨外髁骨折		治愈	张敬东	易先宏	毛诚晃	肱骨骨折闭合复位钢针内固定术
1057	D07儿童骨科、骨盆外科	2021-02-15	2021-02-27	3072719	张加淼	男	72Y	股骨颈骨折	肝大;脾大;肾结石;后天性肾囊肿;肝回声不均	治愈	孔建中	孔建中	陈墨川	髋关节滑膜切除术;全髋关节置换术
1058	D07儿童骨科、骨盆外科	2021-02-12	2021-02-27	3072736	夏云生	男	59Y	肱骨髁间骨折	高血压病;手术后随诊检查;后天性肾囊肿;前列腺结石;脂肪肝	治愈	孔建中	孔建中	陈墨川	股骨骨折切开复位钢板内固定术;关节软骨修复术;股骨植骨术
1059	D07儿童骨科、骨盆外科	2021-02-20	2021-02-27	3072737	吴秧雪	女	52Y	髌骨骨折	膝关节软骨撕裂，近期的;三头肌肌肉和肌腱损伤	治愈	孔建中	孔建中	陈墨川	髌骨骨折切开复位张力带钢丝内固定术;股四头肌成形术;关节软骨修复术
1060	D07儿童骨科、骨盆外科	2021-02-18	2021-02-27	3072740	陈柳香	女	73Y	股骨颈骨折	慢性肾脏病5期;糖尿病;糖尿病伴肾并发症;高血压病	治愈	孔建中	孔建中	陈墨川	人工股骨头置换术
1061	D07儿童骨科、骨盆外科	2021-02-21	2021-02-27	3072745	金凤香	女	62Y	取除骨折内固定装置	下肢动脉粥样硬化;脂肪肝	其他	翁益民	翁益民	柯陈荣	胫骨内固定物取出术
1062	D07儿童骨科、骨盆外科	2021-02-19	2021-02-27	3072753	陈南京	女	84Y	股骨粗隆间骨折	下肢动脉粥样硬化;心房颤动;高血压病;后天性肾囊肿;胫后动脉狭窄;胫前动脉狭窄;多发性脑梗死;肝钙化灶;下肢静脉血栓形成	治愈	孔建中	孔建中	陈墨川	股骨骨折闭合复位髓内针内固定术
1063	D07儿童骨科、骨盆外科	2021-02-15	2021-02-27	3072871	倪美珠	女	80Y	股骨颈骨折	下肢动脉粥样硬化;胆囊结石;高血压病;2型糖尿病;下肢静脉血栓形成;下肢动脉狭窄	治愈	孔建中	孔建中	陈墨川	全髋关节置换术;髋关节滑膜切除术
1064	D07儿童骨科、骨盆外科	2021-02-17	2021-02-28	3072975	翁宗挺	男	63Y	髌骨骨折	下肢动脉粥样硬化;肺钙化;肺部感染	治愈	孔建中	孔建中	陈墨川	髌骨骨折切开复位螺钉内固定术;关节软骨修复术;股四头肌成形术
1065	D07儿童骨科、骨盆外科	2021-02-20	2021-02-28	3073013	牟林熙	男	7Y	肱骨髁上骨折		治愈	张敬东	易先宏	毛诚晃	肱骨骨折闭合复位钢针内固定术
1066	D07儿童骨科、骨盆外科	2021-02-17	2021-02-28	3073020	陈宋怡	女	12Y	胫腓骨干骨折		治愈	张敬东	易先宏	李玉安	石膏绷带固定;胫骨骨折切开复位钢板内固定术
1067	D07儿童骨科、骨盆外科	2021-02-25	2021-02-28	3073024	刘云皓	男	7Y	取除骨折内固定装置		其他	张敬东	易先宏	毛诚晃	肱骨内固定物取出术
1068	D07儿童骨科、骨盆外科	2021-02-23	2021-03-01	3073382	彭禹哲	男	1Y	胫腓骨下端骨折		治愈	张敬东	易先宏	毛诚晃	胫骨骨折闭合复位螺钉内固定术
1069	D07儿童骨科、骨盆外科	2021-02-26	2021-03-02	3073680	林维奖	男	47Y	肱骨上端骨折	肩胛骨骨折	治愈	孔建中	孔建中	陈墨川	肩袖修补术;肱骨骨折切开复位螺钉内固定术
1070	D07儿童骨科、骨盆外科	2021-02-24	2021-03-02	3073682	罗亨明	男	72Y	锁骨骨折	肩胛骨骨折;多发性肋骨骨折;扩张型心肌病;特指含硅[矽]粉尘肺尘埃沉着病;肝囊肿;后天性肾囊肿;胆囊息肉	好转	孔建中	孔建中	陈墨川
1071	D07儿童骨科、骨盆外科	2021-02-27	2021-03-02	3073809	李淑娴	女	1Y	肱骨髁上骨折		治愈	张敬东	易先宏	方明桥	肱骨骨折闭合复位钢针内固定术
1072	D07儿童骨科、骨盆外科	2021-02-28	2021-03-03	3074106	林子墨	女	1Y	肱骨髁上骨折		治愈	张敬东	易先宏	毛诚晃	肱骨骨折闭合复位钢针内固定术
1073	D07儿童骨科、骨盆外科	2021-02-27	2021-03-03	3074107	朱睿博	男	9Y	取除骨折内固定装置		其他	张敬东	易先宏	毛诚晃	肱骨内固定物取出术
1074	D07儿童骨科、骨盆外科	2021-02-22	2021-03-03	3074118	金晓英	女	53Y	肱骨上端骨折	臂丛神经损伤;手术后随诊检查;高血压病;脂肪肝	治愈	翁益民	翁益民	柯陈荣	肱骨骨折闭合复位钢针内固定术
1075	D07儿童骨科、骨盆外科	2021-02-28	2021-03-03	3074120	陈子萱	女	4Y	取除骨折内固定装置		其他	张敬东	易先宏	毛诚晃	股骨内固定物取出术
1076	D07儿童骨科、骨盆外科	2021-02-28	2021-03-03	3074176	陈伟豪	男	11Y	肱骨外髁骨折	鹰嘴骨折	好转	张敬东	易先宏	毛诚晃
1077	D07儿童骨科、骨盆外科	2021-02-23	2021-03-03	3074180	王浩阳	男	8Y	股骨干骨折		治愈	张敬东	易先宏	李玉安	股骨骨折闭合复位髓内针内固定术
1078	D07儿童骨科、骨盆外科	2021-03-01	2021-03-04	3074480	张佳恩	男	5Y	取除骨折内固定装置		其他	张敬东	易先宏	李玉安	膝关节内固定物取出术
1079	D07儿童骨科、骨盆外科	2021-02-26	2021-03-04	3074496	刘志朋	男	3Y	股骨干骨折		治愈	张敬东	易先宏	方明桥	股骨骨折闭合复位钢针内固定术
1080	D07儿童骨科、骨盆外科	2021-02-26	2021-03-04	3074531	章秋兰	女	87Y	肱骨上端骨折	高血压病;2型糖尿病;陈旧性肺结核;心动过速	治愈	孔建中	孔建中	陈墨川	肱骨骨折切开复位钢针内固定术
1081	D07儿童骨科、骨盆外科	2021-02-28	2021-03-04	3074649	杨廷兰	女	64Y	取除骨折内固定装置	高血压病	其他	翁益民	翁益民	柯陈荣	髌骨内固定物取出术
1082	D07儿童骨科、骨盆外科	2021-02-27	2021-03-06	3074881	张轩绮	女	3Y	掌骨骨折	急性上呼吸道感染	治愈	张敬东	易先宏	方明桥	掌骨骨折切开复位钢针内固定术
1083	D07儿童骨科、骨盆外科	2021-02-14	2021-03-06	3074887	厉益丰	男	51Y	跟骨骨折	特指手术后状态	治愈	翁益民	翁益民	柯陈荣	跟骨骨折切开复位钢针内固定术
1084	D07儿童骨科、骨盆外科	2021-03-02	2021-03-06	3074905	姚安琪	女	1Y	指骨骨折		治愈	张敬东	易先宏	方明桥	指骨骨折闭合复位钢针内固定术
1085	D07儿童骨科、骨盆外科	2021-03-01	2021-03-06	3074912	郑安晓	男	35Y	取除骨折内固定装置		其他	翁益民	翁益民	柯陈荣	股骨内固定物取出术;踝关节内固定物取出术
1086	D07儿童骨科、骨盆外科	2021-02-18	2021-03-06	3074924	舒齐凯薇	女	9Y	开放性胫腓骨干骨折	开放性多发性损伤	治愈	张敬东	易先宏	李玉安	胫骨外固定架固定术;胫骨骨折切开复位钢针内固定术
1087	D07儿童骨科、骨盆外科	2021-03-01	2021-03-06	3074945	金上如	男	40Y	取除骨折内固定装置	胆囊结石;前列腺结石	其他	翁益民	翁益民	柯陈荣	胫骨内固定物取出术
1088	D07儿童骨科、骨盆外科	2021-02-26	2021-03-06	3074947	陈康	男	9Y	尺骨桡骨骨干骨折		治愈	张敬东	易先宏	毛诚晃	石膏绷带固定;桡骨骨折切开复位钢板内固定术
1089	D07儿童骨科、骨盆外科	2021-03-02	2021-03-06	3074952	叶诚成	男	10Y	开放性特指指骨骨折	腕和手特指浅表损伤	治愈	张敬东	易先宏	李玉安	指骨骨折闭合复位钢针内固定术
1090	D07儿童骨科、骨盆外科	2021-02-26	2021-03-07	3075329	廖崇菊	女	64Y	股骨颈骨折	高血压病;脂肪肝;肾结石;肺结节	治愈	孔建中	陈墨川	陈墨川	全髋关节置换术
1091	D07儿童骨科、骨盆外科	2021-02-26	2021-03-07	3075331	林兴旺	男	84Y	髌骨骨折	高血压病;2型糖尿病;肾功能异常;肝硬化;肝囊肿;后天性肾囊肿	治愈	孔建中	陈墨川	陈墨川	关节软骨修复术;股四头肌成形术;髌骨骨折切开复位螺钉内固定术
1092	D07儿童骨科、骨盆外科	2021-02-24	2021-03-07	3075334	钟慧娜	女	13Y	股骨干骨折		治愈	张敬东	易先宏	方明桥	股骨骨折切开复位钢针内固定术
1093	D07儿童骨科、骨盆外科	2021-02-22	2021-03-07	3075375	任兴智	男	54Y	骨盆骨折	腰椎骨折;髋和大腿水平皮感觉神经损伤;多处浅表损伤;特指手术后状态;高血压病;脂肪肝;耻骨骨折;骶骨骨折	治愈	翁益民	翁益民	柯陈荣	骨盆外固定架固定术;骨盆骨折切开复位螺钉内固定术
1094	D07儿童骨科、骨盆外科	2021-02-19	2021-03-07	3075379	刘正好	男	32Y	股骨干骨折	多发性肋骨骨折;肺挫伤;肺部感染	治愈	翁益民	翁益民	柯陈荣	股骨骨折闭合复位髓内针内固定术
1095	D07儿童骨科、骨盆外科	2021-02-23	2021-03-08	3075738	蔡锦霞	女	77Y	肱骨上端骨折	肾结石;腔隙性脑梗死;下肢动脉粥样硬化;完全性右束支传导阻滞	治愈	孔建中	孔建中	陈墨川	肱骨骨折切开复位钢针内固定术
1096	D07儿童骨科、骨盆外科	2021-03-04	2021-03-08	3075742	张恩诚	男	8Y	肱骨髁上骨折		治愈	张敬东	易先宏	毛诚晃	肱骨骨折闭合复位钢针内固定术
1097	D07儿童骨科、骨盆外科	2021-03-03	2021-03-08	3075751	金歆乐	女	13Y	股骨特指部位骨折	下肢损伤;膝关节副韧带扭伤;膝关节积液	好转	张敬东	易先宏	毛诚晃
1098	D07儿童骨科、骨盆外科	2021-03-06	2021-03-08	3075761	张慧敏	女	54Y	取除骨折内固定装置		其他	孔建中	孔建中	陈墨川	胫骨内固定物取出术
1099	D07儿童骨科、骨盆外科	2021-02-26	2021-03-08	3075766	孙斌弟	男	64Y	髌骨骨折	高血压病;下肢动脉粥样硬化;脂肪肝	治愈	孔建中	陈墨川	陈墨川	关节软骨修复术;股四头肌成形术;髌骨骨折切开复位螺钉内固定术
1100	D07儿童骨科、骨盆外科	2021-02-28	2021-03-08	3075770	郑荣群	男	49Y	肩胛骨骨折	头皮挫伤	治愈	孔建中	陈墨川	陈墨川	肩胛骨骨折切开复位钢针内固定术
1101	D07儿童骨科、骨盆外科	2021-03-04	2021-03-09	3076023	邹梓翰	男	3Y	取除骨折内固定装置		其他	张敬东	易先宏	李玉安	股骨内固定物取出术
1102	D07儿童骨科、骨盆外科	2021-03-06	2021-03-10	3076475	李州	男	13Y	尺骨桡骨远端骨折	特指手术后状态;后天性肘内翻	治愈	张敬东	易先宏	毛诚晃	桡骨骨折闭合复位钢针内固定术
1103	D07儿童骨科、骨盆外科	2021-03-05	2021-03-10	3076599	谢作畅	男	31Y	跖骨骨折	足特指部位脱位;胆囊息肉;前列腺囊肿	好转	翁益民	翁益民	柯陈荣
1104	D07儿童骨科、骨盆外科	2021-02-26	2021-03-11	3076924	黄顺虎	男	77Y	肩锁关节脱位	肋骨骨折;心脏瓣膜病;完全性右束支传导阻滞;左前分支传导阻滞	治愈	孔建中	孔建中	陈墨川	肩锁关节脱位切开复位内固定术
1105	D07儿童骨科、骨盆外科	2021-03-03	2021-03-11	3076944	张建华	男	15Y	股骨髁骨折	特指手术后状态	治愈	翁益民	翁益民	柯陈荣	股骨骨折切开复位钢板内固定术
1106	D07儿童骨科、骨盆外科	2021-03-09	2021-03-13	3077264	张海滔	男	6Y	肱骨外髁骨折		治愈	张敬东	闫广奎	李玉安	关节软骨修复术;肱骨骨折切开复位钢针内固定术
1107	D07儿童骨科、骨盆外科	2021-03-08	2021-03-13	3077271	陈家豪	男	12Y	尺骨桡骨远端骨折		治愈	张敬东	易先宏	毛诚晃	尺骨骨折闭合复位钢针内固定术
1108	D07儿童骨科、骨盆外科	2021-03-02	2021-03-13	3077278	林哲豪	男	1Y	胫腓骨干骨折		治愈	张敬东	易先宏	毛诚晃	石膏绷带固定;胫骨骨折切开复位钢针内固定术
1109	D07儿童骨科、骨盆外科	2021-02-18	2021-03-13	3077283	陈楚	男	31Y	开放性多发性足骨折	骨筋膜室综合征;跖骨脱位;足背动脉损伤	治愈	翁益民	翁益民	柯陈荣	趾骨骨折闭合复位钢针内固定术;跖关节脱位闭合复位术;跖骨骨折切开复位钢针内固定术
1110	D07儿童骨科、骨盆外科	2021-03-08	2021-03-13	3077286	卢子阳	男	5Y	肱骨外髁骨折		治愈	张敬东	易先宏	毛诚晃	肱骨骨折切开复位钢针内固定术;关节软骨修复术
1111	D07儿童骨科、骨盆外科	2021-03-02	2021-03-13	3077297	郑祥昌	男	74Y	股骨粗隆间骨折	高血压病;肾结石;前列腺增生;前列腺结石;下肢动脉粥样硬化	治愈	孔建中	孔建中	陈墨川	股骨骨折闭合复位钢针内固定术
1112	D07儿童骨科、骨盆外科	2021-02-22	2021-03-13	3077305	钱云楼	男	67Y	足部皮肤撕裂伤	楔状骨骨折(足);高血压病;胆囊息肉;后天性肾囊肿;前列腺增生;跖骨骨折	治愈	翁益民	翁益民	柯陈荣	中厚皮片移植术;皮肤和皮下坏死组织切除清创术
1113	D07儿童骨科、骨盆外科	2021-02-22	2021-03-13	3077320	陈益宝	男	32Y	胫骨骨折累及踝关节	外踝骨折;肺大泡	治愈	翁益民	翁益民	柯陈荣	胫骨骨折切开复位钢针内固定术;踝关节骨折切开复位钢板内固定术
1114	D07儿童骨科、骨盆外科	2021-03-02	2021-03-13	3077330	王自浩	男	6Y	开放性胫骨骨折	特指手术后状态	治愈	孔建中	孔建中	陈墨川	胫骨骨折切开复位髓内针内固定术
1115	D07儿童骨科、骨盆外科	2021-03-02	2021-03-13	3077462	刘爱孙	女	66Y	锁骨骨折	脂肪肝;陈旧性肺结核	治愈	孔建中	孔建中	陈墨川	锁骨骨折切开复位钢针内固定术
1116	D07儿童骨科、骨盆外科	2021-03-03	2021-03-13	3077469	金秋兰	女	67Y	髌骨骨折	高血压病;2型糖尿病;循环系统操作后疾患	治愈	翁益民	翁益民	柯陈荣	髌骨骨折切开复位螺钉内固定术
1117	D07儿童骨科、骨盆外科	2021-03-10	2021-03-14	3077692	戴雅彤	女	2Y	肱骨髁上骨折		治愈	张敬东	易先宏	毛诚晃	肱骨骨折闭合复位钢针内固定术
1118	D07儿童骨科、骨盆外科	2021-02-18	2021-03-14	3077874	钱建强	男	56Y	跟骨骨折	后天性肾囊肿;腰椎峡部裂;耻骨骨折;高血压病;脂肪肝	治愈	孔建中	孔建中	陈墨川	跟骨骨折切开复位螺钉内固定术;跟骨植骨术;关节软骨修复术;骨盆外固定架固定术
1119	D07儿童骨科、骨盆外科	2021-03-08	2021-03-15	3078047	叶晨	男	41Y	肋骨骨折	乙型病毒性肝炎	好转	翁益民	翁益民	柯陈荣
1120	D07儿童骨科、骨盆外科	2021-02-26	2021-03-15	3078050	周李义	男	25Y	开放性胫腓骨干骨折	脂肪肝	治愈	孔建中	孔建中	陈墨川	腓骨骨折闭合复位钢针内固定术;胫骨骨折切开复位钢针内固定术
1121	D07儿童骨科、骨盆外科	2021-03-09	2021-03-15	3078051	俞婧涵	女	6Y	桡骨颈骨折	前臂桡神经损伤;鹰嘴骨折	治愈	张敬东	王伟	李玉安	关节软骨修复术;桡骨骨折切开复位钢针内固定术
1122	D07儿童骨科、骨盆外科	2021-03-04	2021-03-15	3078052	郭李莹	女	3Y	多发性掌骨骨折	手术后随诊检查;手挤压伤	治愈	张敬东	易先宏	方明桥	石膏绷带固定;掌骨骨折切开复位钢针内固定术
1123	D07儿童骨科、骨盆外科	2021-03-03	2021-03-15	3078073	胡学星	男	53Y	外踝骨折	脂肪肝;肝钙化灶;胆囊息肉;单纯性肾囊肿;前列腺结石	治愈	翁益民	翁益民	柯陈荣	踝关节骨折切开复位钢针内固定术
1124	D07儿童骨科、骨盆外科	2021-03-04	2021-03-15	3078074	何莲翠	女	57Y	胫腓骨干骨折	乙型病毒性肝炎;肝硬化;脾大	治愈	翁益民	翁益民	柯陈荣	胫骨骨折切开复位螺钉内固定术
1125	D07儿童骨科、骨盆外科	2021-03-08	2021-03-15	3078129	杜连凤	女	79Y	股骨粗隆间骨折	高血压病;胆总管扩张	治愈	孔建中	孔建中	陈墨川	股骨骨折闭合复位螺钉内固定术
1126	D07儿童骨科、骨盆外科	2021-02-27	2021-03-15	3078131	边立秀	男	24Y	双踝骨折	腓骨骨折;脂肪肝;肾结石;踝关节脱位	治愈	孔建中	陈墨川	陈墨川	关节软骨修复术;踝关节脱位切开复位术;腓骨骨折切开复位螺钉内固定术;踝关节骨折切开复位钢针内固定术
1127	D07儿童骨科、骨盆外科	2021-03-08	2021-03-15	3078160	吕赛乐	女	30Y	锁骨骨折		治愈	孔建中	孔建中	陈墨川	肩锁关节脱位切开复位术;锁骨骨折切开复位钢板内固定术
1128	D07儿童骨科、骨盆外科	2021-03-06	2021-03-15	3078161	余金莲	女	58Y	髌骨骨折	高血压病;脑梗死;胆囊息肉	治愈	孔建中	孔建中	陈墨川	关节软骨修复术;股四头肌成形术;髌骨骨折切开复位螺钉内固定术
1129	D07儿童骨科、骨盆外科	2021-03-14	2021-03-16	3078357	周杰	男	12Y	取除骨折内固定装置		其他	张敬东	易先宏	毛诚晃	肱骨内固定物取出术
1130	D07儿童骨科、骨盆外科	2021-03-06	2021-03-16	3078358	李俊熙	男	5Y	肱骨外髁骨折		治愈	张敬东	易先宏	毛诚晃	肱骨骨折切开复位钢针内固定术
1131	D07儿童骨科、骨盆外科	2021-03-09	2021-03-16	3078361	吴冰琳	女	12Y	跖骨骨折		治愈	张敬东	李玉安	李玉安	跖骨骨折切开复位螺钉内固定术
1132	D07儿童骨科、骨盆外科	2021-02-22	2021-03-16	3078363	张仙敏	男	26Y	腰椎骨折	髋臼前突;骶骨骨折;耻骨骨折;跟骨骨折;胫腓骨下端骨折;跖骨骨折;骨盆骨折;楔状骨骨折(足)	治愈	孔建中	孔建中	陈墨川	跟骨骨折切开复位钢针内固定术;后入路腰椎融合术;踝关节骨折切开复位钢针内固定术;跟骨植骨术;关节软骨修复术
1133	D07儿童骨科、骨盆外科	2021-03-08	2021-03-16	3078365	陈飞凤	女	46Y	胫腓骨下端骨折		治愈	孔建中	孔建中	陈墨川	踝关节骨折切开复位钢针内固定术;胫骨骨折切开复位螺钉内固定术
1134	D07儿童骨科、骨盆外科	2021-03-15	2021-03-16	3078612	林小秋	女	51Y	肘关节骨折	胆囊息肉;肝回声不均;肝血管瘤;腕骨骨折	好转	孔建中	孔建中	陈墨川
1135	D07儿童骨科、骨盆外科	2021-03-14	2021-03-17	3078774	林月磊	男	12Y	取除骨折内固定装置		其他	张敬东	易先宏	毛诚晃	肱骨内固定物取出术
1136	D07儿童骨科、骨盆外科	2021-03-05	2021-03-17	3078785	李小兰	女	55Y	肱骨外科颈骨折	高血压病;特指手术后状态;后天性肾囊肿	治愈	翁益民	翁益民	柯陈荣	肱骨骨折切开复位钢针内固定术
1137	D07儿童骨科、骨盆外科	2021-02-25	2021-03-17	3078791	黄俊珲	男	3Y	股骨干骨折	肱骨髁上骨折;顶骨骨折;创伤性蛛网膜下腔出血;创伤性气胸;肺挫伤;腹水	治愈	张敬东	毛诚晃	毛诚晃	股骨骨折切开复位钢针内固定术;股骨骨折切开复位钢板内固定术
1138	D07儿童骨科、骨盆外科	2021-03-04	2021-03-17	3078793	甘正样	男	90Y	肱骨外科颈骨折	慢性支气管炎;肝钙化灶;多发性肝囊肿;胆囊结石;下肢动脉粥样硬化;下肢动脉狭窄	治愈	翁益民	翁益民	柯陈荣	肱骨骨折切开复位钢针内固定术
1139	D07儿童骨科、骨盆外科	2021-03-03	2021-03-17	3078869	杨兰香	女	88Y	股骨粗隆间骨折	胸椎骨折;高血压病;低钾血症	治愈	孔建中	孔建中	陈墨川	股骨骨折闭合复位钢针内固定术
1140	D07儿童骨科、骨盆外科	2021-03-09	2021-03-17	3078874	白福钦	男	50Y	耻骨骨折	颧骨骨折;高血压病;胆囊息肉;腰椎骨折	治愈	孔建中	孔建中	陈墨川	骨盆外固定架固定术;骨盆骨折闭合复位术
1141	D07儿童骨科、骨盆外科	2021-03-15	2021-03-17	3078881	林显乐	男	45Y	取除骨折内固定装置	脂肪肝;后天性肾囊肿	其他	孔建中	孔建中	陈墨川	踝关节内固定物取出术
1142	D07儿童骨科、骨盆外科	2021-03-16	2021-03-18	3079231	潘昱泽	男	9Y	肱骨髁上骨折		治愈	张敬东	易先宏	毛诚晃	肱骨骨折闭合复位钢针内固定术
1143	D07儿童骨科、骨盆外科	2021-03-14	2021-03-20	3079604	程春景	女	46Y	取除骨折内固定装置		其他	孔建中	孔建中	陈墨川	跟骨内固定物取出术
1144	D07儿童骨科、骨盆外科	2021-03-08	2021-03-20	3079607	余承虎	男	88Y	股骨粗隆间骨折	肾错构瘤;肾结石;多发性肝囊肿;高血压病;脑梗死后遗症	治愈	孔建中	孔建中	陈墨川	股骨骨折闭合复位钢针内固定术
1145	D07儿童骨科、骨盆外科	2021-03-15	2021-03-20	3079610	张阳	男	16Y	坐骨骨折	骨骺滑脱	治愈	孔建中	孔建中	陈墨川	骨盆骨折切开复位钢针内固定术
1146	D07儿童骨科、骨盆外科	2021-03-08	2021-03-20	3079615	胡亚洁	男	17Y	肱骨髁间骨折	肱骨髁上骨折	治愈	孔建中	孔建中	陈墨川	关节软骨修复术;肱骨骨折切开复位钢针内固定术
1147	D07儿童骨科、骨盆外科	2021-03-16	2021-03-20	3079722	周博文	男	9Y	肱骨外科颈骨折		治愈	张敬东	闫广奎	李玉安	肱骨骨折闭合复位钢针内固定术
1148	D07儿童骨科、骨盆外科	2021-03-04	2021-03-20	3079724	陈悠然	女	6Y	肱骨髁上骨折	髂骨骨折;寰枢椎半脱位;肺部感染;耻骨骨折;肺挫伤;心肌损害;头皮血肿;恶性肿瘤术后恢复期	治愈	张敬东	易先宏	方明桥	肱骨骨折闭合复位钢针内固定术
1149	D07儿童骨科、骨盆外科	2021-03-17	2021-03-20	3079886	郑爱梅	女	68Y	肱骨上端骨折	高血压病;类风湿性关节炎;胆囊息肉;肝钙化灶;肺结节	好转	孔建中	孔建中	陈墨川
1150	D07儿童骨科、骨盆外科	2021-03-13	2021-03-21	3079991	毛振散	男	31Y	髋臼骨折		治愈	孔建中	孔建中	陈墨川	关节软骨修复术;骨盆骨折切开复位钢针内固定术
1151	D07儿童骨科、骨盆外科	2021-03-04	2021-03-21	3079999	蔡齐昌	男	58Y	胫骨骨折	腓骨骨折;踝骨闭合性骨折;脂肪肝;前列腺增生	治愈	翁益民	翁益民	柯陈荣	胫骨骨折切开复位钢板内固定术
1152	D07儿童骨科、骨盆外科	2021-03-02	2021-03-21	3080056	周玮琪	女	9Y	股骨髁骨折		治愈	张敬东	毛诚晃	毛诚晃	股骨骨折闭合复位钢针内固定术
1153	D07儿童骨科、骨盆外科	2021-03-14	2021-03-21	3080065	潘文静	女	10Y	尺骨桡骨闭合性骨折		治愈	张敬东	易先宏	毛诚晃	尺骨骨折切开复位钢板内固定术;桡骨骨折切开复位钢板内固定术
1154	D07儿童骨科、骨盆外科	2021-03-16	2021-03-21	3080219	邹圣宝	男	14Y	尺骨桡骨闭合性骨折		治愈	张敬东	易先宏	毛诚晃	尺骨骨折闭合复位钢针内固定术;桡骨骨折闭合复位钢针内固定术
1155	D07儿童骨科、骨盆外科	2021-03-19	2021-03-22	3080425	龚奥辉	男	8Y	胫骨骨干骨折		好转	张敬东	易先宏	李玉安
1156	D07儿童骨科、骨盆外科	2021-03-14	2021-03-22	3080556	胡恩俊	男	8Y	胫骨骨干骨折		治愈	张敬东	易先宏	闫广奎	胫骨骨折切开复位钢针内固定术
1157	D07儿童骨科、骨盆外科	2021-03-18	2021-03-23	3080686	刘锦鸿	男	5Y	取除骨折内固定装置		其他	张敬东	毛诚晃	李玉安	股骨内固定物取出术
1158	D07儿童骨科、骨盆外科	2021-03-14	2021-03-23	3080689	赵纯付	女	51Y	闭合性胫骨平台骨折	膝关节副韧带扭伤;膝关节十字韧带扭伤;肝囊肿;胆囊息肉;后天性肾囊肿	治愈	翁益民	翁益民	柯陈荣	胫骨骨折切开复位钢针内固定术
1159	D07儿童骨科、骨盆外科	2021-03-16	2021-03-23	3080690	马通兵	男	47Y	肱骨上端骨折	肩关节脱位;腋神经损伤;脂肪肝	治愈	孔建中	孔建中	陈墨川	肱骨骨折切开复位钢针内固定术
1160	D07儿童骨科、骨盆外科	2021-03-12	2021-03-24	3081132	吴瑞东	女	51Y	股骨颈骨折	骨质疏松	治愈	翁益民	翁益民	柯陈荣	股骨骨折闭合复位螺钉内固定术
1161	D07儿童骨科、骨盆外科	2021-03-07	2021-03-24	3081143	陈洪记	男	58Y	肱骨下端骨折	肋骨骨折;肺挫伤;气胸;头皮血肿;膝关节十字韧带扭伤;膝关节副韧带扭伤;腓骨骨折;下肢损伤	治愈	孔建中	孔建中	陈墨川	肱骨骨折切开复位钢针内固定术
1162	D07儿童骨科、骨盆外科	2021-03-20	2021-03-24	3081160	洪辰逸	男	6Y	取除骨折内固定装置		其他	张敬东	易先宏	毛诚晃	桡骨内固定物取出术
1163	D07儿童骨科、骨盆外科	2021-03-16	2021-03-24	3081185	蔡爱妹	女	82Y	股骨粗隆间骨折	下肢动脉粥样硬化;Ⅰ度房室传导阻滞	治愈	孔建中	孔建中	陈墨川	股骨骨折闭合复位钢针内固定术
1164	D07儿童骨科、骨盆外科	2021-03-22	2021-03-24	3081339	王小霞	女	66Y	取除骨折内固定装置		其他	翁益民	翁益民	柯陈荣	踝关节内固定物取出术
1165	D07儿童骨科、骨盆外科	2021-03-19	2021-03-25	3081502	江睿洁	女	12Y	踝骨闭合性骨折		治愈	张敬东	易先宏	方明桥	踝关节骨折切开复位钢针内固定术
1166	D07儿童骨科、骨盆外科	2021-03-14	2021-03-25	3081511	黄文隆	男	6Y	股骨干骨折		治愈	张敬东	易先宏	方明桥	股骨骨折切开复位钢针内固定术
1167	D07儿童骨科、骨盆外科	2021-03-21	2021-03-25	3081557	陈锡涛	男	80Y	插入矫形外科植入物后骨折	人工髋关节;2型糖尿病;多发性脑梗死	好转	翁益民	翁益民	柯陈荣
1168	D07儿童骨科、骨盆外科	2021-03-19	2021-03-25	3081576	王玉娥	女	64Y	股骨颈骨折		治愈	孔建中	孔建中	陈墨川	股骨骨折闭合复位螺钉内固定术
1169	D07儿童骨科、骨盆外科	2021-03-23	2021-03-25	3081614	尹利沫	男	3Y	取除骨折内固定装置		其他	张敬东	易先宏	毛诚晃	胫骨内固定物取出术
1170	D07儿童骨科、骨盆外科	2021-03-23	2021-03-27	3081937	陈恩泽	男	7Y	肱骨髁上骨折		治愈	张敬东	毛诚晃	毛诚晃	肱骨骨折闭合复位螺钉内固定术
1171	D07儿童骨科、骨盆外科	2021-03-21	2021-03-27	3081939	朱信民	男	22Y	尺骨桡骨远端骨折	面部软组织挫伤;骨和关节软骨良性肿瘤	治愈	翁益民	翁益民	柯陈荣	尺骨骨折闭合复位螺钉内固定术;桡骨骨折切开复位螺钉内固定术
1172	D07儿童骨科、骨盆外科	2021-03-22	2021-03-27	3081941	吴绵忆	男	11Y	尺骨桡骨闭合性骨折		治愈	张敬东	李玉安	李玉安	桡骨骨折切开复位钢针内固定术;尺骨骨折闭合复位术
1173	D07儿童骨科、骨盆外科	2021-03-20	2021-03-27	3081948	张国光	男	52Y	距骨骨折	楔状骨骨折(足);足舟骨脱位;胫距关节脱位;足特指部位扭伤和劳损;跖骨脱位;跖骨骨折;后天性肾囊肿;前列腺结石	治愈	孔建中	孔建中	陈墨川	距骨骨折切开复位钢针内固定术;踝关节脱位切开复位术;跗跖关节融合术;跗跖关节脱位切开复位术
1174	D07儿童骨科、骨盆外科	2021-03-18	2021-03-27	3081952	王少明	男	52Y	插入矫形外科植入物后骨折	胆囊息肉;前列腺结石;肝回声不均	治愈	孔建中	孔建中	陈墨川	股骨内固定物取出术;股骨骨折闭合复位髓内针内固定术
1175	D07儿童骨科、骨盆外科	2021-03-21	2021-03-27	3081957	谢招旺	男	50Y	胫腓骨干骨折		治愈	孔建中	孔建中	陈墨川	胫骨骨折闭合复位螺钉内固定术
1176	D07儿童骨科、骨盆外科	2021-03-16	2021-03-27	3081961	董钱女	女	70Y	股骨颈骨折	高血压病;下肢动脉粥样硬化;脂肪肝	治愈	孔建中	孔建中	陈墨川	髋关节滑膜切除术;全髋关节置换术
1177	D07儿童骨科、骨盆外科	2021-03-13	2021-03-27	3081967	何月莲	女	69Y	股骨颈骨折	高血压病	治愈	翁益民	翁益民	柯陈荣	全髋关节表面置换术
1178	D07儿童骨科、骨盆外科	2021-03-12	2021-03-27	3081976	周珍桃	女	37Y	股骨骨折		治愈	翁益民	翁益民	柯陈荣	股骨骨折切开复位螺钉内固定术
1179	D07儿童骨科、骨盆外科	2021-03-13	2021-03-27	3082216	陈选翼	男	55Y	肱骨外科颈骨折	2型糖尿病性肾病;臀部软组织损伤;颈椎椎管狭窄;脊髓受压;腰椎间盘变性;颈椎间盘疾患;下肢动脉粥样硬化;脂肪肝;前列腺结石;颈椎间盘突出;腰椎间盘突出;2型糖尿病性周围神经病	治愈	翁益民	翁益民	柯陈荣	肱骨骨折切开复位钢针内固定术
1180	D07儿童骨科、骨盆外科	2021-03-21	2021-03-28	3082374	黄立诚	男	6Y	尺骨桡骨闭合性骨折		治愈	张敬东	易先宏	毛诚晃	尺骨骨折闭合复位髓内针内固定术
1181	D07儿童骨科、骨盆外科	2021-03-16	2021-03-28	3082390	漆和清	女	63Y	股骨头无菌性坏死	取除骨折内固定装置;髋关节炎	治愈	孔建中	孔建中	陈墨川	髋关节滑膜切除术;股骨内固定物取出术;全髋关节置换术
1182	D07儿童骨科、骨盆外科	2021-03-23	2021-03-28	3082391	刘羽凡	男	5Y	肱骨髁上骨折	上肢神经损伤	治愈	张敬东	易先宏	毛诚晃	肱骨骨折闭合复位螺钉内固定术
1183	D07儿童骨科、骨盆外科	2021-03-24	2021-03-28	3082395	刘贤	男	11Y	肱骨髁上骨折		治愈	张敬东	毛诚晃	毛诚晃	肱骨骨折闭合复位钢板内固定术
1184	D07儿童骨科、骨盆外科	2021-03-25	2021-03-29	3082737	苏剑柔	女	7Y	肱骨髁上骨折		治愈	张敬东	易先宏	方明桥	肱骨骨折闭合复位螺钉内固定术
1185	D07儿童骨科、骨盆外科	2021-03-16	2021-03-29	3082738	黄航航	男	7Y	股骨骨折		治愈	张敬东	易先宏	李玉安	股骨骨折切开复位钢针内固定术
1186	D07儿童骨科、骨盆外科	2021-03-14	2021-03-29	3082746	虞铭	男	39Y	跖骨骨折	脂肪肝	治愈	孔建中	孔建中	陈墨川	跗跖关节脱位切开复位术;跖骨骨折切开复位钢针内固定术
1187	D07儿童骨科、骨盆外科	2021-03-18	2021-03-29	3082752	林顺和	男	57Y	开放性桡骨骨折	胆囊结石;后天性肾囊肿	治愈	孔建中	孔建中	陈墨川	桡骨骨折切开复位钢针内固定术
1188	D07儿童骨科、骨盆外科	2021-03-26	2021-03-30	3083110	曹优优	女	6Y	胫腓骨闭合性骨折		治愈	孔建中	孔建中	陈墨川	胫骨骨折闭合复位髓内针内固定术
1189	D07儿童骨科、骨盆外科	2021-03-25	2021-03-30	3083113	叶一凡	男	4Y	尺骨骨折	前臂桡神经损伤;桡骨头脱位	治愈	张敬东	毛诚晃	毛诚晃	尺骨骨折闭合复位钢针内固定术
1190	D07儿童骨科、骨盆外科	2021-03-22	2021-03-30	3083115	刘后奖	男	52Y	特指趾骨骨折	前列腺结石;开放性足损伤;足部皮肤撕裂伤;开放性趾损伤;足背动脉损伤;脂肪肝;胆囊息肉;肾结石	治愈	孔建中	孔建中	陈墨川	皮肤和皮下坏死组织切除清创术;趾关节融合术;趾骨骨折闭合复位钢针内固定术
1191	D07儿童骨科、骨盆外科	2021-03-15	2021-03-31	3083479	黄晓飞	男	44Y	胫腓骨下端骨折		治愈	孔建中	孔建中	陈墨川	踝关节融合术;关节软骨修复术;胫骨骨折切开复位钢针内固定术;腓骨骨折切开复位钢针内固定术
1192	D07儿童骨科、骨盆外科	2021-03-21	2021-03-31	3083485	吴英微	女	45Y	三踝骨折	陈旧性踝关节骨折;骨折治疗后恢复期	治愈	翁益民	翁益民	柯陈荣	韧带修补术;踝关节骨折切开复位钢针内固定术
1193	D07儿童骨科、骨盆外科	2021-03-21	2021-04-01	3083918	陈晓东	男	46Y	胫骨下端骨折	外踝骨折;脂肪肝	治愈	孔建中	孔建中	陈墨川	踝关节骨折切开复位钢针内固定术;胫骨骨折切开复位钢针内固定术
1194	D07儿童骨科、骨盆外科	2021-03-24	2021-04-03	3084255	姚雨泽	男	3Y	股骨骨折		治愈	张敬东	李玉安	闫广奎	股骨骨折闭合复位髓内针内固定术
1195	D07儿童骨科、骨盆外科	2021-03-29	2021-04-03	3084257	董乃祥	男	5Y	肱骨髁上骨折	前臂神经损伤	治愈	张敬东	易先宏	毛诚晃	肱骨骨折闭合复位钢针内固定术
1196	D07儿童骨科、骨盆外科	2021-03-25	2021-04-03	3084269	林意凯	男	10Y	胫骨骨折		好转	张敬东	毛诚晃	闫广奎	胫骨骨折闭合复位螺钉内固定术
1197	D07儿童骨科、骨盆外科	2021-03-30	2021-04-03	3084282	凌乙枫	男	5M	足部皮肤撕裂伤	股骨骨折	治愈	张敬东	易先宏	李玉安	皮肤和皮下组织非切除性清创
1198	D07儿童骨科、骨盆外科	2021-03-22	2021-04-03	3084294	黄永妹	女	90Y	股骨粗隆间骨折	高血压病;下肢动脉粥样硬化;骨质疏松;骨折治疗后恢复期	治愈	翁益民	翁益民	柯陈荣	股骨骨折切开复位钢针内固定术
1199	D07儿童骨科、骨盆外科	2021-03-15	2021-04-03	3084298	张碎竹	女	92Y	股骨粗隆下骨折	2型糖尿病;下肢动脉粥样硬化;下肢静脉血栓形成;脂肪肝;肝囊肿;骨质疏松;高血压病	治愈	翁益民	翁益民	柯陈荣	股骨骨折闭合复位钢针内固定术;下腔静脉滤器置入术;股静脉穿刺术
1200	D07儿童骨科、骨盆外科	2021-03-27	2021-04-03	3084299	王海丽	女	36Y	取除骨折内固定装置		其他	赵友明	赵友明	周玉龙	髌骨内固定物取出术
1201	D07儿童骨科、骨盆外科	2021-03-26	2021-04-03	3084311	叶林森	男	61Y	股骨骨折	脂肪肝	好转	孔建中	孔建中	陈墨川	股骨骨折闭合复位钢针内固定术
1202	D07儿童骨科、骨盆外科	2021-03-29	2021-04-03	3084313	翁士聪	男	53Y	肱骨外科颈骨折		治愈	孔建中	孔建中	陈墨川	肱骨骨折切开复位钢针内固定术;肩袖修补术
1203	D07儿童骨科、骨盆外科	2021-03-26	2021-04-03	3084317	夏宝玲	女	55Y	双踝骨折	踝关节扭伤	治愈	孔建中	孔建中	陈墨川	踝关节骨折切开复位钢针内固定术;踝关节骨折切开复位钢板内固定术
1204	D07儿童骨科、骨盆外科	2021-03-21	2021-04-03	3084322	卢零龙	男	5Y	肱骨骨折	肺挫伤;肺部感染;鼻骨骨折;多发性损伤	好转	张敬东	易先宏	方明桥
1205	D07儿童骨科、骨盆外科	2021-03-23	2021-04-03	3084327	芦娇媚	女	69Y	胫骨骨折	腓骨骨折;踝关节扭伤;特指关节软骨疾患	治愈	孔建中	孔建中	陈墨川	关节软骨修复术;胫骨骨折切开复位钢板内固定术;腓骨骨折切开复位钢针内固定术
1206	D07儿童骨科、骨盆外科	2021-03-21	2021-04-03	3084332	陈茜	女	43Y	闭合性胫骨平台骨折	腓骨骨折;膝关节副韧带扭伤;膝外侧半月板损伤;膝关节积液;膝关节十字韧带扭伤;膝内侧半月板损伤	治愈	翁益民	翁益民	柯陈荣	胫骨骨折切开复位钢针内固定术
1207	D07儿童骨科、骨盆外科	2021-04-02	2021-04-04	3084644	林晰	女	1Y	指骨骨折		治愈	张敬东	易先宏	方明桥	指骨骨折闭合复位钢针内固定术
1208	D07儿童骨科、骨盆外科	2021-03-22	2021-04-04	3084755	刘红花	女	70Y	胫骨骨折	肋骨骨折;高血压病;肝病;胸椎退行性病变;心功能不全	好转	孔建中	孔建中	陈墨川	关节软骨修复术;胫骨骨折切开复位钢针内固定术
1209	D07儿童骨科、骨盆外科	2021-03-26	2021-04-04	3084789	施李娟	女	70Y	股骨粗隆间骨折	高血压病;2型糖尿病;主动脉瓣疾患;脂肪肝;胆囊结石;下肢动脉粥样硬化;心功能不全	治愈	孔建中	孔建中	陈墨川	股骨骨折闭合复位钢针内固定术
1210	D07儿童骨科、骨盆外科	2021-03-29	2021-04-05	3084929	潘帆	男	14Y	肱骨内髁骨折	肘关节扭伤	治愈	张敬东	易先宏	李玉安	肱骨骨折切开复位钢针内固定术;副韧带修补术
1211	D07儿童骨科、骨盆外科	2021-03-26	2021-04-05	3084934	陈冠初	男	3Y	股骨干骨折		好转	张敬东	毛诚晃	闫广奎	股骨骨折闭合复位钢针内固定术
1212	D07儿童骨科、骨盆外科	2021-03-27	2021-04-05	3084939	黄建欧	男	43Y	胫腓骨干骨折	脂肪肝;腰椎峡部裂;面部损伤;腰椎滑脱;肌腱和肌肉损伤	治愈	孔建中	孔建中	陈墨川	腓骨骨折闭合复位髓内针内固定术;胫骨骨折闭合复位髓内针内固定术
1213	D07儿童骨科、骨盆外科	2021-04-02	2021-04-05	3084948	余宗煜	男	13Y	取除骨折内固定装置		其他	张敬东	王伟	闫广奎	肱骨内固定物取出术
1214	D07儿童骨科、骨盆外科	2021-04-03	2021-04-05	3084952	张欣蕊	女	7Y	肱骨上端骨折		好转	张敬东	闫广奎	闫广奎
1215	D07儿童骨科、骨盆外科	2021-03-28	2021-04-05	3084954	井紫妍	女	5Y	胫腓骨下端骨折		治愈	张敬东	易先宏	毛诚晃	胫骨骨折闭合复位螺钉内固定术
1216	D07儿童骨科、骨盆外科	2021-03-30	2021-04-05	3084958	郑安妮	女	1Y	肱骨外髁骨折	肝功能异常	治愈	张敬东	易先宏	毛诚晃	关节软骨修复术;肱骨骨折切开复位钢针内固定术
1217	D07儿童骨科、骨盆外科	2021-03-26	2021-04-05	3084995	叶海涛	男	39Y	锁骨骨折	肾结石;脂肪肝	治愈	翁益民	翁益民	柯陈荣	锁骨骨折闭合复位钢针内固定术
1218	D07儿童骨科、骨盆外科	2021-03-09	2021-04-05	3085059	王金虎	男	71Y	腰椎骨折	创伤性血气胸;特指胸内器官损伤;单纯性肾囊肿;脑挫伤;肝囊肿;肺挫伤;跟骨骨折;胸骨骨折;骨盆骨折;失血性休克;创伤性蛛网膜下腔出血	治愈	翁益民	翁益民	柯陈荣	跟骨骨折切开复位钢针内固定术;股动脉造影;髂动脉栓塞术;后入路腰椎融合术;骨盆外固定架固定术
1219	D07儿童骨科、骨盆外科	2021-03-30	2021-04-06	3085219	王晨	男	12Y	桡骨下端骨折	前臂尺神经损伤	治愈	张敬东	易先宏	闫广奎	桡骨骨折闭合复位钢针内固定术
1220	D07儿童骨科、骨盆外科	2021-03-30	2021-04-06	3085221	陈依涵	女	7Y	股骨下端骨折		治愈	孔建中	孔建中	陈墨川	股骨骨折切开复位钢针内固定术
1221	D07儿童骨科、骨盆外科	2021-04-05	2021-04-06	3085271	张子轩	男	1Y	尺骨桡骨远端骨折		好转	张敬东	李玉安	闫广奎
1222	D07儿童骨科、骨盆外科	2021-03-22	2021-04-07	3085640	金生妹	女	90Y	股骨恶性肿瘤	病理性骨折;高血压病	治愈	孔建中	孔建中	陈墨川	人工股骨头置换术;股骨病损切除术;股骨骨折切开复位钢针内固定术;水泥间隔物置入术
1223	D07儿童骨科、骨盆外科	2021-04-03	2021-04-07	3085656	朱帅权	男	2Y	肱骨髁上骨折		治愈	张敬东	易先宏	毛诚晃	肱骨骨折闭合复位钢针内固定术
1224	D07儿童骨科、骨盆外科	2021-03-31	2021-04-07	3085663	王嘉诚	男	2Y	肱骨外髁骨折		治愈	张敬东	易先宏	方明桥	肱骨骨折切开复位钢针内固定术
1225	D07儿童骨科、骨盆外科	2021-03-24	2021-04-07	3085667	郑碎唐	男	67Y	闭合性胫骨平台骨折	膝外侧半月板损伤;高血压病;胆囊息肉	治愈	翁益民	翁益民	柯陈荣	胫骨骨折切开复位钢针内固定术
1226	D07儿童骨科、骨盆外科	2021-03-23	2021-04-07	3085682	张田林	男	48Y	开放性胫腓骨干骨折	小腿浅表损伤;肝囊肿;胆囊息肉;后天性肾囊肿	治愈	翁益民	翁益民	柯陈荣	胫骨骨折切开复位钢针内固定术;腓骨骨折切开复位钢针内固定术
1227	D07儿童骨科、骨盆外科	2021-04-01	2021-04-07	3085721	胡明辰	男	11Y	股骨髁骨折		治愈	张敬东	易先宏	方明桥	股骨骨折闭合复位钢针内固定术
1228	D07儿童骨科、骨盆外科	2021-03-17	2021-04-09	3086260	李运阳	男	47Y	跟骨骨折	内踝骨折;跖骨骨折;胫骨下端骨折;楔状骨骨折(足);骨折治疗后恢复期;跖骨脱位	治愈	翁益民	翁益民	柯陈荣	跟骨骨折切开复位钢板内固定术;跗跖关节脱位切开复位术;踝关节骨折切开复位钢板内固定术
1229	D07儿童骨科、骨盆外科	2021-04-02	2021-04-10	3086432	郑涵静	女	3Y	股骨干骨折	腕和手水平肌肉和肌腱损伤	治愈	张敬东	易先宏	方明桥	股骨骨折闭合复位螺钉内固定术;皮肤和皮下组织非切除性清创
1230	D07儿童骨科、骨盆外科	2021-04-04	2021-04-10	3086433	卢成煌	男	12Y	尺骨桡骨骨干骨折		治愈	张敬东	易先宏	方明桥	桡骨骨折闭合复位髓内针内固定术
1231	D07儿童骨科、骨盆外科	2021-04-03	2021-04-10	3086451	胡玉华	女	46Y	锁骨骨折		治愈	孔建中	孔建中	陈墨川	锁骨骨折切开复位钢针内固定术
1232	D07儿童骨科、骨盆外科	2021-04-03	2021-04-10	3086455	郑爱香	女	83Y	股骨粗隆间骨折	高血压病;下肢动脉粥样硬化;脂肪肝;后天性肾囊肿	治愈	孔建中	孔建中	陈墨川	股骨骨折切开复位钢针内固定术
1233	D07儿童骨科、骨盆外科	2021-03-24	2021-04-10	3086572	华国宇	男	3Y	股骨骨折	肱骨髁上骨折;额骨骨折;眶骨骨折;蛛网膜下腔出血;肺挫伤;头皮血肿;肌腱和肌肉损伤;枕骨骨折	治愈	张敬东	易先宏	毛诚晃	股骨骨折切开复位钢针内固定术
1234	D07儿童骨科、骨盆外科	2021-03-31	2021-04-10	3086578	徐秋山	女	53Y	三踝骨折	踝和足浅表损伤	治愈	翁益民	翁益民	柯陈荣	踝关节骨折切开复位钢针内固定术
1235	D07儿童骨科、骨盆外科	2021-04-02	2021-04-11	3086823	沈春梅	女	94Y	股骨粗隆间骨折		好转	孔建中	孔建中	陈墨川	股骨骨折闭合复位钢针内固定术
1236	D07儿童骨科、骨盆外科	2021-02-19	2021-04-11	3086827	刘鑫	女	4Y	下肢皮肤套脱伤	多发性损伤;锁骨骨折	治愈	张敬东	易先宏	方明桥	皮肤和皮下坏死组织切除清创术;皮肤和皮下组织非切除性清创
1237	D07儿童骨科、骨盆外科	2021-04-09	2021-04-11	3086829	伊若莱	女	8Y	肱骨髁上骨折	上肢神经损伤	治愈	张敬东	易先宏	毛诚晃	肱骨骨折闭合复位钢针内固定术
1238	D07儿童骨科、骨盆外科	2021-04-04	2021-04-11	3086831	李秋峰	男	26Y	腓骨骨折		治愈	陈龙	陈龙	应晓洲	腓骨骨折切开复位钢针内固定术
1239	D07儿童骨科、骨盆外科	2021-04-08	2021-04-12	3087154	匡邓亿	男	7Y	取除骨折内固定装置		其他	张敬东	易先宏	毛诚晃	肱骨内固定物取出术
1240	D07儿童骨科、骨盆外科	2021-04-09	2021-04-12	3087157	陈增法	男	5Y	肱骨髁上骨折		治愈	张敬东	易先宏	方明桥	肱骨骨折闭合复位钢针内固定术
1241	D07儿童骨科、骨盆外科	2021-01-02	2021-04-12	3087158	张雨宁	女	4Y	股骨骨折	肱骨髁上骨折;锁骨骨折;股骨髁骨折;头皮血肿;鼻骨骨折;肺炎;下肢开放性伤口;开放性多发性损伤	治愈	张敬东	王伟	闫广奎	肱骨骨折闭合复位钢针内固定术;皮肤和皮下坏死组织切除清创术;肱骨外固定架去除术;鼻骨骨折闭合复位术;股骨骨折切开复位钢针内固定术;股骨外固定架固定术
1242	D07儿童骨科、骨盆外科	2021-04-02	2021-04-12	3087161	潘怡欣	女	11Y	肱骨内髁骨折	腕和手水平手尺神经损伤	好转	张敬东	易先宏	闫广奎	肱骨骨折切开复位钢针内固定术;副韧带修补术
1243	D07儿童骨科、骨盆外科	2021-03-29	2021-04-12	3087169	叶阿香	女	81Y	股骨颈骨折	神经痛;高血压病;腔隙性脑梗死;颈动脉硬化;下肢静脉血栓形成;下肢动脉粥样硬化;焦虑状态;卵巢囊肿;锁骨下动脉粥样硬化	治愈	翁益民	翁益民	柯陈荣	人工股骨头置换术
1244	D07儿童骨科、骨盆外科	2021-04-03	2021-04-12	3087204	王振昌	男	61Y	股骨粗隆间骨折	下肢动脉粥样硬化;特指手术后状态;下肢静脉曲张	治愈	孔建中	孔建中	陈墨川	股骨骨折闭合复位钢针内固定术
1245	D07儿童骨科、骨盆外科	2021-04-07	2021-04-13	3087488	廖静怡	女	1Y	股骨干骨折		治愈	张敬东	易先宏	方明桥	股骨骨折闭合复位术;石膏绷带固定
1246	D07儿童骨科、骨盆外科	2021-03-21	2021-04-13	3087490	黄庆法	男	52Y	胫骨下端骨折	腓骨骨折;外踝骨折;距骨骨折;脂肪肝;前列腺增生;前列腺结石;下肢动脉粥样硬化	治愈	翁益民	翁益民	柯陈荣	踝关节骨折切开复位钢针内固定术;胫骨骨折切开复位钢板内固定术
1247	D07儿童骨科、骨盆外科	2021-04-07	2021-04-13	3087492	许保东	男	2Y	肱骨下端骨折		治愈	张敬东	易先宏	方明桥	肱骨骨折闭合复位钢针内固定术
1248	D07儿童骨科、骨盆外科	2021-04-07	2021-04-13	3087496	陈果而	女	5Y	肱骨髁上骨折		治愈	翁益民	翁益民	柯陈荣	肱骨骨折闭合复位钢针内固定术
1249	D07儿童骨科、骨盆外科	2021-03-28	2021-04-13	3087498	黄素珍	女	46Y	脊柱骨折	股骨粗隆间骨折;骨盆骨折;创伤性休克	治愈	孔建中	孔建中	陈墨川	椎弓根钉内固定术;后入路腰椎融合术;股骨骨折切开复位钢针内固定术
1250	D07儿童骨科、骨盆外科	2021-04-03	2021-04-14	3087862	孔红荣	女	41Y	胫骨骨折	胆囊息肉;脂肪肝	治愈	孔建中	孔建中	陈墨川	距骨骨折切开复位钢针内固定术
1251	D07儿童骨科、骨盆外科	2021-03-29	2021-04-14	3087863	王永棋	男	23Y	手术后切口感染	骨折治疗后随诊检查;特指手术后状态	治愈	孔建中	孔建中	陈墨川
1252	D07儿童骨科、骨盆外科	2021-03-30	2021-04-14	3087870	金振声	男	86Y	股骨颈骨折	高血压病;肺部感染;甲状腺结节;下肢动脉粥样硬化;多发性肝囊肿;后天性肾囊肿;前列腺增生;前列腺结石	治愈	翁益民	翁益民	柯陈荣	人工股骨头置换术
1253	D07儿童骨科、骨盆外科	2021-04-11	2021-04-14	3087872	刘一墨	女	3Y	肱骨髁上骨折		治愈	张敬东	易先宏	方明桥	肱骨骨折闭合复位钢针内固定术
1254	D07儿童骨科、骨盆外科	2021-04-11	2021-04-14	3087874	郑航	男	4Y	取除骨折内固定装置		其他	张敬东	易先宏	毛诚晃	肱骨内固定物取出术
1255	D07儿童骨科、骨盆外科	2021-04-12	2021-04-17	3088850	邵克凡	男	6Y	取除骨折内固定装置		其他	张敬东	易先宏	方明桥	胫骨内固定物取出术
1256	D07儿童骨科、骨盆外科	2021-04-09	2021-04-17	3088851	李俊华	男	72Y	闭合性胫骨平台骨折	后天性肾囊肿;下肢动脉粥样硬化;冠状动脉粥样硬化性心脏病;糖尿病;具有心脏起搏器;高血压病	治愈	孔建中	孔建中	陈墨川	胫骨骨折切开复位钢针内固定术;关节软骨修复术;胫骨植骨术
1257	D07儿童骨科、骨盆外科	2021-04-10	2021-04-17	3088852	刘婉琪	女	4Y	取除骨折内固定装置		其他	张敬东	易先宏	毛诚晃	髋关节内固定物取出术
1258	D07儿童骨科、骨盆外科	2021-04-12	2021-04-17	3088858	刘方	男	9Y	肱骨髁上骨折	上肢神经损伤	治愈	张敬东	易先宏	方明桥	肱骨骨折闭合复位钢针内固定术
1259	D07儿童骨科、骨盆外科	2021-04-12	2021-04-17	3088863	李展翔	男	7Y	取除骨折内固定装置		其他	张敬东	易先宏	方明桥	肱骨内固定物取出术
1260	D07儿童骨科、骨盆外科	2021-04-12	2021-04-17	3088870	潘豪翔	男	6Y	取除骨折内固定装置	腕和手水平肌肉和肌腱损伤	其他	张敬东	张敬东	闫广奎	手部肌腱成形术;尺骨内固定物取出术
1261	D07儿童骨科、骨盆外科	2021-04-13	2021-04-17	3088876	王铭凯	男	9Y	尺骨桡骨远端骨折		治愈	张敬东	易先宏	毛诚晃	桡骨骨折切开复位钢板内固定术
1262	D07儿童骨科、骨盆外科	2021-04-14	2021-04-17	3088886	唐佳乐	男	2Y	肱骨干骨折		好转	张敬东	毛诚晃	闫广奎
1263	D07儿童骨科、骨盆外科	2021-04-10	2021-04-17	3088903	叶玉娇	女	58Y	肱骨髁间骨折	肱骨髁上骨折;乙型病毒性肝炎	治愈	孔建中	孔建中	陈墨川	关节软骨修复术;肱骨骨折切开复位钢针内固定术
1264	D07儿童骨科、骨盆外科	2021-04-03	2021-04-17	3088907	陈香弟	女	78Y	股骨粗隆间骨折	插入矫形外科植入物后骨折;高血压病;心脏病;胆囊结石;糖尿病;下肢动脉粥样硬化	治愈	孔建中	孔建中	陈墨川	股骨骨折切开复位钢针内固定术;股骨内固定物取出术
1265	D07儿童骨科、骨盆外科	2021-04-05	2021-04-17	3088910	林胜益	男	36Y	开放性腓骨骨折	前列腺结石;特指手术后状态	治愈	孔建中	孔建中	陈墨川	胫骨骨折切开复位钢针内固定术
1266	D07儿童骨科、骨盆外科	2021-04-03	2021-04-17	3088915	刘碎英	女	76Y	股骨颈骨折	桡骨骨折;老年性脑萎缩;增殖型肺结核;下肢动脉粥样硬化;肺钙化;脂肪肝;胆囊结石;乙型病毒性肝炎;下肢静脉血栓形成	治愈	孔建中	孔建中	陈墨川	人工股骨头置换术
1267	D07儿童骨科、骨盆外科	2021-04-09	2021-04-17	3088920	李传井	男	60Y	股骨颈骨折	高血压病;慢性支气管炎;后天性肾囊肿;肾结石;心脏病	治愈	孔建中	孔建中	陈墨川	股骨骨折切开复位钢针内固定术
1268	D07儿童骨科、骨盆外科	2021-04-05	2021-04-17	3088926	刘日晓	男	52Y	胫腓骨下端骨折	高血压病;室间隔肥大;前列腺结石;多发性肝囊肿;后天性肾囊肿;脂肪肝	治愈	孔建中	孔建中	陈墨川	胫骨骨折切开复位钢针内固定术
1269	D07儿童骨科、骨盆外科	2021-04-10	2021-04-17	3088932	林昌浩	男	27Y	闭合性胫骨平台骨折	脂肪肝;腓骨骨折	治愈	翁益民	翁益民	柯陈荣	胫骨骨折切开复位钢针内固定术
1270	D07儿童骨科、骨盆外科	2021-03-27	2021-04-17	3089046	章帆	男	21Y	股骨干骨折	上颌骨骨折;眶骨骨折;视神经损伤;肾结石;膀胱结石;创伤性失明	治愈	翁益民	翁益民	柯陈荣	股骨骨折闭合复位钢针内固定术
1271	D07儿童骨科、骨盆外科	2021-04-15	2021-04-18	3089318	蔡云皓	男	13Y	桡骨下端骨折	尺桡关节脱位	好转	孔建中	孔建中	陈墨川
1272	D07儿童骨科、骨盆外科	2021-04-06	2021-04-18	3089324	潘佳乐	女	11Y	股骨颈骨折		治愈	张敬东	易先宏	方明桥	股骨骨折闭合复位钢针内固定术
1273	D07儿童骨科、骨盆外科	2021-04-08	2021-04-18	3089326	许舒涵	女	5Y	跟骨骨折		好转	张敬东	易先宏	方明桥
1274	D07儿童骨科、骨盆外科	2021-04-16	2021-04-18	3089328	黄雨辰	男	4Y	桡骨骨折		好转	张敬东	易先宏	方明桥
1275	D07儿童骨科、骨盆外科	2021-03-21	2021-04-18	3089331	徐贤众	男	50Y	胫腓骨干骨折	肝囊肿;下肢皮肤撕裂伤;下肢动脉粥样硬化;后天性肾囊肿;坏疽	治愈	翁益民	翁益民	柯陈荣	胫骨骨折切开复位钢针内固定术;胫骨外固定架固定术
1276	D07儿童骨科、骨盆外科	2021-04-14	2021-04-19	3089664	陈文滨	男	2Y	肱骨髁上骨折		治愈	张敬东	易先宏	方明桥	肱骨骨折闭合复位钢针内固定术
1277	D07儿童骨科、骨盆外科	2021-04-04	2021-04-19	3089668	陈当然	男	7Y	指骨骨折	腕和手水平特指手指屈肌和肌腱损伤;特指手术随诊医疗;开放性手指损伤伴指甲损害;特指单个手指部分或完全切断	治愈	张敬东	易先宏	毛诚晃	手部肌腱成形术;甲床清创术;残端修正术;指骨骨折切开复位钢针内固定术
1278	D07儿童骨科、骨盆外科	2021-04-16	2021-04-19	3089670	金帅	男	3Y	肱骨髁上骨折		治愈	张敬东	易先宏	方明桥	肱骨骨折闭合复位钢针内固定术
1279	D07儿童骨科、骨盆外科	2021-04-13	2021-04-19	3089671	何宏章	男	1Y	胫骨骨折		好转	张敬东	闫广奎	闫广奎
1280	D07儿童骨科、骨盆外科	2021-04-13	2021-04-19	3089675	潘冬蕊	女	40Y	锁骨骨折	肾结石	治愈	孔建中	孔建中	陈墨川	锁骨骨折切开复位钢针内固定术
1281	D07儿童骨科、骨盆外科	2021-04-04	2021-04-19	3089677	李春柳	女	59Y	桡骨下端骨折	高血压病;肾结石;脂肪肝	治愈	孔建中	孔建中	陈墨川	桡骨骨折切开复位钢针内固定术
1282	D07儿童骨科、骨盆外科	2021-04-11	2021-04-19	3089687	胡碎权	男	65Y	股骨骨折	前列腺增生;下肢动脉粥样硬化;前列腺结石;糖尿病;高血压病	治愈	孔建中	孔建中	陈墨川	股骨骨折闭合复位钢针内固定术
1283	D07儿童骨科、骨盆外科	2021-04-01	2021-04-19	3089698	刘元旭	男	31Y	距骨骨折	跟骨骨折;肝囊肿;胫距关节脱位	治愈	翁益民	翁益民	柯陈荣	跗跖关节脱位切开复位术;跟骨植骨术;跟骨骨折切开复位钢板内固定术;胫骨骨折切开复位钢针内固定术
1284	D07儿童骨科、骨盆外科	2021-04-14	2021-04-20	3089955	苏明憬	男	7Y	肱骨外科颈骨折		治愈	张敬东	闫广奎	闫广奎	肱骨骨折闭合复位钢针内固定术
1285	D07儿童骨科、骨盆外科	2021-04-15	2021-04-20	3089957	洪秋红	女	61Y	股骨颈骨折		治愈	孔建中	孔建中	陈墨川	股骨骨折闭合复位钢针内固定术
1286	D07儿童骨科、骨盆外科	2021-04-16	2021-04-20	3089963	李睿柏	男	7Y	胫骨骨折		好转	张敬东	易先宏	方明桥
1287	D07儿童骨科、骨盆外科	2021-04-14	2021-04-21	3090390	陈仁杰	男	12Y	肱骨内髁骨折		治愈	张敬东	易先宏	闫广奎	肱骨骨折切开复位钢针内固定术
1288	D07儿童骨科、骨盆外科	2021-04-14	2021-04-21	3090395	陈珺睿	女	9Y	肱骨内髁骨折		治愈	张敬东	易先宏	闫广奎	肱骨骨折切开复位钢针内固定术
1289	D07儿童骨科、骨盆外科	2021-04-15	2021-04-21	3090402	李肖亚文	女	27Y	肱骨外科颈骨折		治愈	孔建中	孔建中	陈墨川	肱骨骨折切开复位钢针内固定术
1290	D07儿童骨科、骨盆外科	2021-04-15	2021-04-21	3090404	李金泽	男	2Y	股骨骨折		治愈	张敬东	易先宏	方明桥	股骨骨折闭合复位髓内针内固定术
1291	D07儿童骨科、骨盆外科	2021-04-05	2021-04-21	3090409	戴嘉磊	男	14Y	肱骨髁上骨折	前臂神经损伤;皮下血肿;桡骨下端骨折;胫骨骨折;股骨骨折	治愈	张敬东	易先宏	毛诚晃	胫骨外固定架固定术;肱骨骨折闭合复位钢针内固定术;石膏绷带固定;桡骨骨折闭合复位术;胫骨骨折切开复位钢针内固定术
1292	D07儿童骨科、骨盆外科	2021-04-10	2021-04-21	3090555	唐小连	女	69Y	股骨颈骨折	下肢动脉粥样硬化;胆囊胆固醇沉着症	治愈	翁益民	翁益民	柯陈荣	全髋关节置换术
1293	D07儿童骨科、骨盆外科	2021-04-11	2021-04-21	3090556	黄笑珍	女	62Y	肱骨上端骨折	2型糖尿病;下肢动脉粥样硬化;脂肪肝	治愈	翁益民	翁益民	柯陈荣	肱骨骨折切开复位钢针内固定术
1294	D07儿童骨科、骨盆外科	2021-04-13	2021-04-21	3090622	谢聪明	男	86Y	股骨粗隆间骨折	主动脉瓣疾患;心功能不全;肝囊肿;下肢动脉狭窄;单纯性肾囊肿;下肢动脉粥样硬化	治愈	孔建中	孔建中	陈墨川	髋关节滑膜切除术;全髋关节置换术
1295	D07儿童骨科、骨盆外科	2021-04-14	2021-04-22	3090740	黄天成	男	7Y	股骨骨折		治愈	张敬东	易先宏	毛诚晃	股骨骨折闭合复位钢针内固定术
1296	D07儿童骨科、骨盆外科	2021-04-15	2021-04-23	3091087	蔡钊铭	男	28Y	锁骨骨折	前列腺囊肿	治愈	孔建中	孔建中	陈墨川	锁骨骨折闭合复位钢针内固定术
1297	D07儿童骨科、骨盆外科	2021-03-07	2021-04-24	3091193	罗雨涵	女	6Y	胫骨骨髓炎	下肢软组织感染;取除骨折内固定装置	治愈	张敬东	易先宏	闫广奎	皮肤和皮下坏死组织切除清创术;皮肤和皮下组织活检;胫骨内固定物取出术
1298	D07儿童骨科、骨盆外科	2021-04-19	2021-04-24	3091204	刘以晨	女	7Y	肱骨外髁骨折		治愈	张敬东	易先宏	方明桥	肱骨骨折切开复位钢针内固定术
1299	D07儿童骨科、骨盆外科	2021-04-19	2021-04-24	3091301	张湘	男	11Y	肱骨髁上骨折		治愈	张敬东	易先宏	方明桥	肱骨骨折闭合复位钢针内固定术
1300	D07儿童骨科、骨盆外科	2021-03-28	2021-04-24	3091371	陈必豪	男	36Y	胫骨骨折	跟骨骨折;脊柱骨折	治愈	孔建中	孔建中	陈墨川	跟骨骨折切开复位钢针内固定术;胫骨骨折切开复位钢针内固定术
1301	D07儿童骨科、骨盆外科	2021-04-19	2021-04-24	3091380	杨庭魁	男	13Y	取除骨折内固定装置		其他	张敬东	易先宏	毛诚晃	尺骨内固定物取出术
1302	D07儿童骨科、骨盆外科	2021-04-19	2021-04-24	3091384	潘桉桢	男	8Y	桡骨颈骨折	前臂桡神经损伤	治愈	张敬东	易先宏	毛诚晃	桡骨骨折切开复位钢针内固定术
1303	D07儿童骨科、骨盆外科	2021-04-13	2021-04-24	3091466	干利英	女	57Y	髂骨骨折	骨盆骨折;胸椎骨折;腰椎骨折;耻骨骨折;面部挫伤;脂肪肝	治愈	孔建中	孔建中	陈墨川	骨盆骨折闭合复位术;髂骨骨折切开复位钢板内固定术
1304	D07儿童骨科、骨盆外科	2021-04-17	2021-04-24	3091467	吴蕙茹	女	7Y	桡骨颈骨折		治愈	张敬东	易先宏	方明桥	桡骨骨折切开复位钢针内固定术
1305	D07儿童骨科、骨盆外科	2021-04-17	2021-04-24	3091472	李长生	男	87Y	股骨粗隆间骨折	颈动脉硬化;下肢动脉粥样硬化;脂肪肝;胆总管扩张;后天性肾囊肿;膀胱特指疾病;前列腺增生;下肢动脉狭窄;胆总管结石;前列腺结石;肾周积液	治愈	孔建中	孔建中	陈墨川	股骨骨折闭合复位钢针内固定术
1306	D07儿童骨科、骨盆外科	2021-04-18	2021-04-24	3091507	蔡小冬	女	60Y	取除骨折内固定装置	肝囊肿	其他	翁益民	翁益民	柯陈荣	肱骨内固定物取出术
1307	D07儿童骨科、骨盆外科	2021-04-15	2021-04-24	3091515	邢成锐	男	49Y	内踝骨折	肾结石	好转	孔建中	孔建中	陈墨川	踝关节骨折切开复位钢针内固定术
1308	D07儿童骨科、骨盆外科	2021-04-10	2021-04-24	3091594	杨青转	男	59Y	股骨骨折	骨折治疗后恢复期;后天性槌状指	治愈	翁益民	翁益民	柯陈荣	股骨骨折切开复位钢板内固定术
1309	D07儿童骨科、骨盆外科	2021-04-13	2021-04-25	3091685	吴月珠	女	69Y	股骨颈骨折	脂肪肝;肝内胆管结石;下肢动脉粥样硬化;肝囊肿;后天性肾囊肿	治愈	孔建中	孔建中	陈墨川	髋关节滑膜切除术;全髋关节置换术
1310	D07儿童骨科、骨盆外科	2021-04-16	2021-04-25	3091867	林昕宸	女	8Y	股骨干骨折	肺特指疾患;眶骨骨折;踝骨闭合性骨折;腹水	治愈	张敬东	易先宏	毛诚晃	肱骨骨折切开复位髓内针内固定术;踝关节骨折闭合复位钢针内固定术
1311	D07儿童骨科、骨盆外科	2021-04-12	2021-04-25	3091869	陈孙增	男	13Y	股骨颈骨折	髋关节内翻变形	治愈	张敬东	易先宏	闫广奎	股骨骨折切开复位钢丝内固定术;股骨植骨术
1312	D07儿童骨科、骨盆外科	2021-03-28	2021-04-25	3091871	张文浩	男	72Y	闭合性胫骨平台骨折	半月板撕裂，近期的;膝关节软骨撕裂，近期的;高血压病;下肢动脉粥样硬化;特指手术随诊医疗	治愈	孔建中	孔建中	陈墨川	胫骨植骨术;关节软骨修复术;膝关节半月板成形术;胫骨骨折切开复位钢针内固定术
1313	D07儿童骨科、骨盆外科	2021-04-14	2021-04-25	3091895	黄彩凤	女	64Y	闭合性胫骨平台骨折	抑郁症;皮下血肿;脂肪肝;半月板撕裂，近期的;膝关节软骨撕裂，近期的;特指手术随诊医疗	治愈	孔建中	孔建中	陈墨川	胫骨植骨术;胫骨骨折切开复位钢针内固定术;膝关节半月板成形术;关节软骨修复术
1314	D07儿童骨科、骨盆外科	2021-04-20	2021-04-25	3091907	麻海龙	男	3Y	股骨干骨折		治愈	张敬东	易先宏	毛诚晃	股骨骨折闭合复位钢针内固定术
1315	D07儿童骨科、骨盆外科	2021-04-21	2021-04-26	3092073	郑长汇	男	9Y	取除骨折内固定装置		其他	张敬东	易先宏	闫广奎	桡骨内固定物取出术
1316	D07儿童骨科、骨盆外科	2021-04-21	2021-04-26	3092078	郑恩慈	女	1Y	肱骨外髁骨折		治愈	张敬东	易先宏	闫广奎	肱骨骨折切开复位钢针内固定术
1317	D07儿童骨科、骨盆外科	2021-04-17	2021-04-26	3092187	缪丽尔	女	35Y	取除骨折内固定装置	陈旧性腓骨骨折	其他	翁益民	翁益民	柯陈荣	胫骨内固定物取出术
1318	D07儿童骨科、骨盆外科	2021-04-12	2021-04-27	3092578	黄正光	男	61Y	股骨颈骨折	右位心;内脏反位;前列腺结石;脂肪肝	治愈	翁益民	翁益民	柯陈荣	全髋关节置换术
1319	D07儿童骨科、骨盆外科	2021-04-25	2021-04-27	3092602	张雪	女	10Y	肱骨髁上骨折		治愈	张敬东	闫广奎	闫广奎	肱骨骨折闭合复位钢针内固定术
1320	D07儿童骨科、骨盆外科	2021-04-21	2021-04-28	3092747	陈书豪	男	14Y	尺骨桡骨闭合性骨折		治愈	张敬东	易先宏	闫广奎	尺骨骨折切开复位钢针内固定术
1321	D07儿童骨科、骨盆外科	2021-04-22	2021-04-28	3092796	周玮玮	女	13Y	胫骨骨折		治愈	张敬东	易先宏	毛诚晃	胫骨骨折闭合复位螺钉内固定术
1322	D07儿童骨科、骨盆外科	2021-04-24	2021-04-28	3092800	徐娇娇	女	2Y	肱骨外髁骨折		治愈	张敬东	易先宏	方明桥	肱骨骨折切开复位钢针内固定术
1323	D07儿童骨科、骨盆外科	2021-04-24	2021-04-28	3092821	王添逸	男	7Y	肱骨外髁骨折		治愈	张敬东	易先宏	毛诚晃	肱骨骨折闭合复位钢针内固定术
1324	D07儿童骨科、骨盆外科	2021-04-19	2021-04-28	3093032	刘建明	男	54Y	桡骨骨折	脂肪肝;高血压病	治愈	翁益民	翁益民	柯陈荣	桡骨骨折切开复位钢针内固定术
1325	D07儿童骨科、骨盆外科	2021-04-03	2021-04-28	3093049	都春香	女	53Y	特指趾骨骨折	踝和足水平趾长伸肌和肌腱损伤;多发性损伤;梅毒;足趾脱位;下肢开放性伤口	治愈	孔建中	孔建中	陈墨川	皮肤和皮下坏死组织切除清创术;足血管、神经、肌腱探查术;趾骨截骨术;石膏绷带固定;趾骨骨折闭合复位钢针内固定术
1326	D07儿童骨科、骨盆外科	2021-04-20	2021-04-28	3093086	芮满祥	男	46Y	髌骨骨折	特指手术后状态;四头肌和肌腱损伤;特指关节软骨疾患	治愈	孔建中	孔建中	陈墨川	关节软骨修复术;股四头肌缝合术;皮肤和皮下坏死组织切除清创术;髌骨骨折切开复位张力带钢丝内固定术
1327	D07儿童骨科、骨盆外科	2021-04-22	2021-04-28	3093111	刘乐	男	13Y	尺骨桡骨远端骨折		治愈	张敬东	易先宏	方明桥	尺骨骨折闭合复位术;桡骨骨折切开复位钢针内固定术;石膏绷带固定
1328	D07儿童骨科、骨盆外科	2021-04-23	2021-04-29	3093492	黄欣悦	女	4Y	肱骨髁上骨折		治愈	孔建中	孔建中	陈墨川	肱骨骨折切开复位钢针内固定术
1329	D07儿童骨科、骨盆外科	2021-04-25	2021-04-29	3093508	薛继涛	男	13Y	锁骨骨折		治愈	孔建中	孔建中	陈墨川	锁骨骨折切开复位钢针内固定术
1330	D07儿童骨科、骨盆外科	2021-04-26	2021-05-02	3093973	谢心怡	女	8Y	取除骨折内固定装置		其他	张敬东	易先宏	方明桥	肱骨内固定物取出术;瘢痕松解术
1331	D07儿童骨科、骨盆外科	2021-04-24	2021-05-02	3093977	王德玮	男	6Y	距骨骨折	肌腱和肌肉损伤	治愈	张敬东	易先宏	毛诚晃	距骨骨折切开复位钢针内固定术
1332	D07儿童骨科、骨盆外科	2021-04-27	2021-05-02	3093993	张紫涵	女	4Y	指骨骨折		治愈	张敬东	易先宏	方明桥	指骨骨折闭合复位钢针内固定术
1333	D07儿童骨科、骨盆外科	2021-04-24	2021-05-02	3094001	缪爱英	女	68Y	肱骨上端骨折	高血压病;肝胆管扩张;特指手术后状态	治愈	孔建中	陈墨川	陈墨川	肩袖修补术;肱骨骨折切开复位钢针内固定术
1334	D07儿童骨科、骨盆外科	2021-04-20	2021-05-02	3094056	高玉钗	女	84Y	股骨颈骨折	心功能不全;退行性主动脉瓣疾患;下肢动脉粥样硬化;肺动脉高压轻度;心包积液;肾占位性病变;下肢静脉曲张;室间隔肥大	治愈	孔建中	孔建中	陈墨川	髋关节滑膜切除术;全髋关节置换术
1335	D07儿童骨科、骨盆外科	2021-04-27	2021-05-02	3094064	叶智斌	男	7Y	取除骨折内固定装置		其他	张敬东	易先宏	毛诚晃	胫骨内固定物取出术
1336	D07儿童骨科、骨盆外科	2021-04-19	2021-05-02	3094122	周飞云	女	58Y	膝关节副韧带扭伤	膝挫伤;膝关节积液;骨折治疗后恢复期;下肢特指损伤;特指骨软骨病;膝关节十字韧带扭伤;半月板损伤	治愈	翁益民	柯陈荣	柯陈荣	副韧带修补术
1337	D07儿童骨科、骨盆外科	2021-04-24	2021-05-02	3094172	史启恒	男	9Y	胫骨骨折		治愈	张敬东	易先宏	毛诚晃	胫骨骨折切开复位钢针内固定术
1338	D07儿童骨科、骨盆外科	2021-04-27	2021-05-02	3094174	李睿柏	男	7Y	胫骨骨折		治愈	张敬东	毛诚晃	毛诚晃	胫骨骨折切开复位钢针内固定术
1339	D07儿童骨科、骨盆外科	2021-04-19	2021-05-02	3094179	朱岩松	男	93Y	髌骨骨折	下肢动脉粥样硬化;脂肪肝;胆囊结石;心功能不全;二尖瓣返流;主动脉瓣增厚;前列腺增生;后天性肾囊肿	治愈	孔建中	孔建中	陈墨川	髌骨骨折切开复位螺钉内固定术
1340	D07儿童骨科、骨盆外科	2021-04-22	2021-05-03	3094324	李家欣	女	5Y	胫腓骨干骨折	多发性损伤;楔状骨骨折(足);骰骨骨折;跖骨骨折;拇趾骨折;足挤压伤	好转	张敬东	易先宏	方明桥
1341	D07儿童骨科、骨盆外科	2021-04-21	2021-05-03	3094388	杨树立	男	11Y	双踝骨折	足部皮肤撕裂伤;面部裂伤;趾伸肌腱断裂;足挤压伤;下颌骨骨折;颞下颌关节疾患	治愈	张敬东	易先宏	方明桥	皮肤和皮下组织非切除性清创;踝关节骨折切开复位钢针内固定术;关节软骨修复术
1342	D07儿童骨科、骨盆外科	2021-04-26	2021-05-03	3094407	余小华	女	64Y	股骨颈骨折	后天性肾囊肿;胆囊息肉	治愈	孔建中	孔建中	陈墨川	股骨骨折闭合复位钢针内固定术
1343	D07儿童骨科、骨盆外科	2021-04-20	2021-05-03	3094414	黄崇友	男	66Y	股骨粗隆间骨折	膝关节副韧带扭伤;膝关节十字韧带劳损;恶性肿瘤手术后随诊检查;心脏病;2型糖尿病;高血压病;半月板损伤	治愈	翁益民	翁益民	柯陈荣	股骨骨折闭合复位钢针内固定术
1344	D07儿童骨科、骨盆外科	2021-05-01	2021-05-04	3094767	赵梓绮	女	8Y	胫骨骨折		好转	张敬东	易先宏	方明桥
1345	D07儿童骨科、骨盆外科	2021-05-01	2021-05-04	3094875	石开宇	男	42Y	取除骨折内固定装置		其他	孔建中	孔建中	陈墨川	踝关节内固定物取出术
1346	D07儿童骨科、骨盆外科	2021-05-01	2021-05-04	3094925	季天翊	男	6Y	胫腓骨干骨折	小腿浅表损伤	未愈	张敬东	易先宏	毛诚晃
1347	D07儿童骨科、骨盆外科	2021-04-28	2021-05-05	3095159	袁静茹	女	3Y	胫腓骨干骨折		治愈	张敬东	易先宏	方明桥	胫骨骨折闭合复位髓内针内固定术
1348	D07儿童骨科、骨盆外科	2021-04-30	2021-05-05	3095248	唐雨	男	9Y	胫腓骨干骨折		治愈	张敬东	易先宏	毛诚晃	胫骨骨折闭合复位髓内针内固定术
1349	D07儿童骨科、骨盆外科	2021-04-28	2021-05-05	3095288	胡月娥	女	76Y	取除骨折内固定装置	高血压病;室间隔肥大;退行性主动脉瓣疾患;下肢动脉粥样硬化;心功能不全;脂肪肝;二尖瓣返流	其他	孔建中	孔建中	陈墨川	股骨内固定物取出术
1350	D07儿童骨科、骨盆外科	2021-04-21	2021-05-05	3095323	王爱琴	女	47Y	踝骨闭合性骨折	跖骨骨折;肾和输尿管特指疾病;高尿酸血症;肾功能异常;胆囊结石;后天性肾囊肿;特指趾骨骨折;肾钙化	治愈	翁益民	翁益民	柯陈荣	皮肤和皮下组织非切除性清创;踝关节骨折切开复位钢针内固定术
1351	D07儿童骨科、骨盆外科	2021-04-14	2021-05-05	3095329	黄小英	女	58Y	股骨粗隆间骨折	特指手术后状态;骨盆骨折;高血压病;股骨干骨折;腰椎骨折;失血性休克	治愈	孔建中	孔建中	陈墨川	髂动脉栓塞术;股骨外固定架固定术;下肢动脉造影;股骨骨折闭合复位髓内针内固定术;骨盆骨折闭合复位术
1352	D07儿童骨科、骨盆外科	2021-04-21	2021-05-05	3095354	麻三妹	女	82Y	股骨颈骨折	2型糖尿病;指骨骨折;胆囊结石;脑梗死;多发性脑梗死;脂肪肝;高血压病	治愈	翁益民	翁益民	柯陈荣	人工股骨头置换术
1353	D07儿童骨科、骨盆外科	2021-04-20	2021-05-05	3095365	杨银妹	女	66Y	肱骨上端骨折	肩关节脱位;腋神经损伤;混合型颈椎病;恶性肿瘤术后恢复期;创伤性胸腔积液;颈椎间盘突出;脂肪肝	治愈	翁益民	翁益民	柯陈荣	肩关节脱位闭合复位术;肱骨骨折切开复位钢针内固定术
1354	D07儿童骨科、骨盆外科	2021-05-05	2021-05-05	3095405	金朝鸣	男	57Y	腓骨骨折	内踝骨折	未愈	孔建中	孔建中	陈墨川
1355	D07儿童骨科、骨盆外科	2021-04-01	2021-05-05	3095421	陆超永	男	42Y	前臂特指部位挤压伤	股骨干骨折;创伤性直肠破裂;创伤性尿道断裂;踝骨闭合性骨折;骨盆骨折;失血性休克	治愈	孔建中	孔建中	陈墨川	横结肠造口修正术;髂动脉栓塞术;骨盆外固定架固定术;腹腔镜检查;前臂离断术;皮瓣修整术
1356	D07儿童骨科、骨盆外科	2021-05-01	2021-05-08	3095936	徐诚涵	男	6Y	肱骨外髁骨折		治愈	张敬东	易先宏	毛诚晃	肱骨骨折切开复位钢针内固定术
1357	D07儿童骨科、骨盆外科	2021-04-28	2021-05-08	3096005	黄智晨	男	4Y	肱骨髁上骨折		治愈	张敬东	易先宏	方明桥	肱骨骨折闭合复位钢针内固定术
1358	D07儿童骨科、骨盆外科	2021-04-22	2021-05-08	3096065	曹梓浩	男	8Y	跖骨骨折	开放性手部损伤;踝和足水平趾长伸肌和肌腱损伤;踝和足水平神经损伤;开放性足损伤;足趾扭伤和劳损	治愈	张敬东	易先宏	方明桥	足神经松解术;肌腱成形术;跖骨骨折切开复位钢针内固定术;皮肤和皮下组织非切除性清创;跗跖关节融合术
1359	D07儿童骨科、骨盆外科	2021-05-02	2021-05-08	3096074	邱豪威	男	9Y	胫骨骨折	下肢开放性伤口;特指手术后状态	好转	张敬东	易先宏	方明桥
1360	D07儿童骨科、骨盆外科	2021-04-28	2021-05-08	3096117	郑歆颖	女	6Y	肱骨外髁骨折		治愈	张敬东	易先宏	方明桥	肱骨骨折切开复位钢针内固定术
1361	D07儿童骨科、骨盆外科	2021-05-04	2021-05-08	3096156	林宸妤	女	9Y	锁骨骨折		治愈	孔建中	孔建中	陈墨川	锁骨骨折切开复位钢针内固定术
1362	D07儿童骨科、骨盆外科	2021-04-30	2021-05-08	3096174	林灏哲	男	7Y	肱骨外髁骨折		治愈	张敬东	易先宏	毛诚晃	肱骨骨折闭合复位钢针内固定术
1363	D07儿童骨科、骨盆外科	2021-04-27	2021-05-08	3096213	刘艳容	女	26Y	胫骨骨干骨折		治愈	孔建中	孔建中	陈墨川	胫骨骨折切开复位钢板内固定术
1364	D07儿童骨科、骨盆外科	2021-04-28	2021-05-08	3096228	林歆雅	女	6Y	桡骨颈骨折	鹰嘴骨折	治愈	张敬东	易先宏	毛诚晃	桡骨骨折切开复位钢针内固定术
1365	D07儿童骨科、骨盆外科	2021-04-19	2021-05-08	3096230	闫伟	女	24Y	桡骨头骨折	桡骨下端骨折;面部软组织挫伤;耻骨骨折;尺骨上端骨折;眼眶挫伤;肘关节脱位;眶骨骨折;眼睑挫伤;髂骨骨折;髋臼骨折	治愈	翁益民	翁益民	柯陈荣	桡骨骨折切开复位钢针内固定术
1366	D07儿童骨科、骨盆外科	2021-04-29	2021-05-08	3096253	徐勋旺	男	49Y	内踝骨折	肝血管瘤;肝回声不均	治愈	翁益民	翁益民	柯陈荣	踝关节骨折切开复位钢针内固定术
1367	D07儿童骨科、骨盆外科	2021-05-04	2021-05-09	3096362	邓世佳	男	2Y	肱骨外髁骨折		治愈	张敬东	易先宏	毛诚晃	肱骨骨折切开复位钢针内固定术
1368	D07儿童骨科、骨盆外科	2021-04-29	2021-05-09	3096398	叶双蝶	女	5Y	股骨骨折		治愈	张敬东	易先宏	毛诚晃	股骨骨折切开复位钢针内固定术
1369	D07儿童骨科、骨盆外科	2021-05-04	2021-05-09	3096514	牛欣雨	女	6Y	肱骨外髁骨折		治愈	张敬东	易先宏	方明桥	肱骨骨折切开复位钢针内固定术
1370	D07儿童骨科、骨盆外科	2021-04-26	2021-05-09	3096591	陈阿芬	女	46Y	闭合性胫骨平台骨折	下肢动脉粥样硬化;心功能不全;乙型病毒性肝炎;半月板损伤;膝关节软骨撕裂，近期的;脂肪肝;胆囊息肉;单纯性肾囊肿	治愈	孔建中	孔建中	陈墨川	胫骨骨折切开复位钢针内固定术;膝关节半月板成形术;关节软骨修复术
1371	D07儿童骨科、骨盆外科	2021-04-24	2021-05-09	3096618	黄维守	男	68Y	特指部位骨折不连接	脂肪肝;胆囊息肉;膀胱结石;前列腺增生;心包积液;骨折内固定装置障碍;取除骨折内固定装置	治愈	孔建中	孔建中	陈墨川	锁骨骨折切开复位钢针内固定术;锁骨内固定物取出术;锁骨植骨术
1372	D07儿童骨科、骨盆外科	2021-04-22	2021-05-09	3096636	周文卫	男	50Y	闭合性胫骨平台骨折	肝囊肿;肌腱和肌肉损伤	治愈	翁益民	翁益民	柯陈荣	胫骨骨折切开复位钢针内固定术
1373	D07儿童骨科、骨盆外科	2021-04-27	2021-05-10	3096753	胡许娒	女	94Y	股骨粗隆间骨折	梅毒;后天性肾囊肿;下肢动脉粥样硬化;下肢静脉血栓形成;静脉石;退行性主动脉瓣疾患;二尖瓣返流;心功能不全;胫前动脉狭窄	治愈	孔建中	孔建中	陈墨川	股骨骨折闭合复位钢针内固定术
1374	D07儿童骨科、骨盆外科	2021-05-09	2021-05-10	3096768	刘润秋	男	7Y	骨折治疗后随诊检查		其他	张敬东	易先宏	闫广奎
1375	D07儿童骨科、骨盆外科	2021-05-06	2021-05-10	3096772	谢如城	男	5Y	肱骨外髁骨折		治愈	张敬东	易先宏	方明桥	肱骨骨折闭合复位钢针内固定术
1376	D07儿童骨科、骨盆外科	2021-05-06	2021-05-10	3096787	汤可欣	女	5Y	指骨骨折	腕和手水平特指手指伸肌和肌腱损伤	治愈	张敬东	易先宏	毛诚晃	肌腱成形术;指骨骨折切开复位钢针内固定术
1377	D07儿童骨科、骨盆外科	2021-05-05	2021-05-10	3096864	林乐汐	女	5Y	肱骨髁上骨折		治愈	张敬东	易先宏	毛诚晃	肱骨骨折闭合复位钢针内固定术
1378	D07儿童骨科、骨盆外科	2021-04-23	2021-05-10	3096940	秦秀兰	女	63Y	骨盆骨折	腰椎骨折;高血压病;主动脉钙化;脂肪肝	治愈	孔建中	孔建中	陈墨川	骨盆骨折切开复位钢板内固定术;后入路腰椎融合术
1379	D07儿童骨科、骨盆外科	2021-05-06	2021-05-10	3096968	翁绍博	男	9Y	尺骨桡骨闭合性骨折		未愈	孔建中	孔建中	陈墨川	桡骨骨折闭合复位钢针内固定术;尺骨骨折闭合复位钢针内固定术
1380	D07儿童骨科、骨盆外科	2021-05-05	2021-05-11	3097227	赵逸涵	男	10Y	锁骨骨折		治愈	张敬东	易先宏	方明桥	锁骨骨折切开复位钢针内固定术
1381	D07儿童骨科、骨盆外科	2021-04-20	2021-05-11	3097238	林柳花	女	72Y	跖骨骨折	趾伸肌腱断裂;外踝骨折;胫骨下端骨折;跖骨脱位;心脏病	治愈	翁益民	翁益民	柯陈荣	肌腱成形术;创面负压封闭引流[VSD];跖骨骨折切开复位钢针内固定术
1382	D07儿童骨科、骨盆外科	2021-04-18	2021-05-11	3097244	陈顺财	男	64Y	胫腓骨干骨折	退行性主动脉瓣疾患;糖尿病;高血压病;前列腺结石;前列腺增生;下肢动脉粥样硬化	治愈	孔建中	孔建中	陈墨川	胫骨骨折闭合复位螺钉内固定术
1383	D07儿童骨科、骨盆外科	2021-04-11	2021-05-11	3097285	冯陈昌	男	62Y	闭合性胫骨平台骨折	前列腺增生	治愈	孔建中	孔建中	陈墨川	胫骨骨折切开复位钢针内固定术
1384	D07儿童骨科、骨盆外科	2021-05-06	2021-05-12	3097468	姚家乐	男	12Y	锁骨骨折		治愈	张敬东	易先宏	方明桥	锁骨骨折切开复位钢针内固定术
1385	D07儿童骨科、骨盆外科	2021-05-06	2021-05-12	3097654	余金满	男	12Y	取除骨折内固定装置		其他	张敬东	易先宏	闫广奎	尺骨内固定物取出术
1386	D07儿童骨科、骨盆外科	2021-05-02	2021-05-12	3097670	谢世宝	男	52Y	股骨粗隆间骨折		治愈	翁益民	翁益民	柯陈荣	股骨骨折闭合复位钢针内固定术
1387	D07儿童骨科、骨盆外科	2021-05-09	2021-05-12	3097690	张宇哲	男	4Y	取除骨折内固定装置		其他	张敬东	易先宏	毛诚晃	股骨内固定物取出术
1388	D07儿童骨科、骨盆外科	2021-05-04	2021-05-12	3097729	陈杜斌	男	10Y	肱骨内髁骨折		治愈	张敬东	易先宏	闫广奎	肱骨骨折切开复位钢针内固定术
1389	D07儿童骨科、骨盆外科	2021-05-08	2021-05-14	3098111	毛若蓁	女	2Y	肱骨骨折		治愈	孔建中	孔建中	陈墨川	肱骨骨折闭合复位术
1390	D07儿童骨科、骨盆外科	2021-05-04	2021-05-14	3098143	缪长生	男	62Y	小腿开放性损伤	肝囊肿;腓骨骨折	治愈	孔建中	孔建中	陈墨川	创面负压封闭引流[VSD];皮肤和皮下坏死组织切除清创术;下肢肌肉缝合术
1391	D07儿童骨科、骨盆外科	2021-05-05	2021-05-15	3098219	蔡国盛	男	6Y	股骨干骨折		治愈	张敬东	易先宏	毛诚晃	股骨骨折闭合复位钢针内固定术
1392	D07儿童骨科、骨盆外科	2021-05-08	2021-05-15	3098225	陈卓	男	3Y	股骨干骨折	髂骨骨折	治愈	张敬东	易先宏	毛诚晃	股骨骨折闭合复位钢针内固定术
1393	D07儿童骨科、骨盆外科	2021-05-10	2021-05-15	3098251	兰宜堽	男	7Y	取除骨折内固定装置		其他	张敬东	易先宏	毛诚晃	尺骨内固定物取出术
1394	D07儿童骨科、骨盆外科	2021-04-27	2021-05-15	3098330	杨炳兴	男	86Y	股骨颈骨折	前列腺增生;前列腺结石;下肢动脉粥样硬化;肾积水伴肾结石	治愈	孔建中	孔建中	陈墨川	髋关节滑膜切除术;全髋关节表面置换术
1395	D07儿童骨科、骨盆外科	2021-05-12	2021-05-15	3098384	关震	男	8Y	锁骨骨折		好转	张敬东	易先宏	方明桥
1396	D07儿童骨科、骨盆外科	2021-05-03	2021-05-15	3098453	金丹弟	女	75Y	股骨粗隆间骨折	高血压病;颈动脉硬化;腰椎滑脱;骨质疏松;下肢静脉血栓形成	治愈	孔建中	孔建中	陈墨川	股骨骨折闭合复位钢针内固定术
1397	D07儿童骨科、骨盆外科	2021-05-08	2021-05-15	3098462	孙若夕	女	4Y	股骨粗隆间骨折		治愈	张敬东	易先宏	方明桥	股骨骨折闭合复位钢针内固定术
1398	D07儿童骨科、骨盆外科	2021-05-10	2021-05-15	3098491	戚建春	男	56Y	肩骨折	肝囊肿;肝内胆管结石;肩锁关节脱位	治愈	孔建中	孔建中	陈墨川	韧带修补术;肩锁关节内固定物取出术;肩锁关节脱位切开复位内固定术;肩胛骨骨折切开复位钢针内固定术
1399	D07儿童骨科、骨盆外科	2021-05-10	2021-05-15	3098500	王秋节	女	5Y	肱骨外髁骨折		治愈	张敬东	易先宏	方明桥	肱骨骨折切开复位钢针内固定术
1400	D07儿童骨科、骨盆外科	2021-05-10	2021-05-15	3098549	曾晓燕	女	49Y	外踝骨折		治愈	孔建中	孔建中	陈墨川	踝关节骨折切开复位钢针内固定术
1401	D07儿童骨科、骨盆外科	2021-04-24	2021-05-15	3098567	王永乐	男	61Y	开放性胫腓骨干骨折	股动脉闭塞;特指手术后状态;肝病;后天性肾囊肿;前列腺增生;前列腺结石;前列腺囊肿;慢性乙型病毒性肝炎	治愈	孔建中	孔建中	陈墨川	胫骨植骨术;胫骨骨折切开复位钢板内固定术;皮肤和皮下坏死组织切除清创术
1402	D07儿童骨科、骨盆外科	2021-05-06	2021-05-16	3098853	刘奇奇	女	10Y	尺骨桡骨闭合性骨折	臂丛神经损伤	好转	张敬东	易先宏	方明桥	桡骨骨折切开复位髓内针内固定术;尺骨骨折切开复位髓内针内固定术
1403	D07儿童骨科、骨盆外科	2021-04-30	2021-05-16	3098866	潘剑萍	女	57Y	胫骨下端骨折	腓骨骨折;脂肪肝;踝骨闭合性骨折	治愈	翁益民	翁益民	柯陈荣	胫骨骨折切开复位钢针内固定术
1404	D07儿童骨科、骨盆外科	2021-04-23	2021-05-16	3098874	陈若茜	女	7Y	特指趾骨骨折	跖骨骨折;开放性足损伤;坏疽	治愈	张敬东	易先宏	方明桥	皮肤和皮下坏死组织切除清创术;肌腱、血管、神经探查术;趾骨骨折闭合复位钢针内固定术
1405	D07儿童骨科、骨盆外科	2021-04-25	2021-05-16	3098938	李正	男	8Y	股骨骨折	脊柱侧弯;不完全截瘫;肺部感染	好转	张敬东	易先宏	方明桥
1406	D07儿童骨科、骨盆外科	2021-05-11	2021-05-16	3098985	柳醒生	男	62Y	取除骨折内固定装置	脂肪肝;2型糖尿病;特指手术后状态;高血压病	其他	翁益民	翁益民	柯陈荣	胫骨内固定物取出术
1407	D07儿童骨科、骨盆外科	2021-05-09	2021-05-17	3099152	章厚妙	男	67Y	髌骨骨折	后天性肾囊肿;下肢动脉粥样硬化;膝关节病;肺部感染;胸腔积液;肺不典型增生	治愈	孔建中	孔建中	陈墨川	关节软骨修复术;股四头肌缝合术;髌骨骨折切开复位螺钉内固定术
1408	D07儿童骨科、骨盆外科	2021-04-29	2021-05-17	3099156	吴君伍	男	90Y	股骨粗隆间骨折	下肢动脉粥样硬化;下肢静脉血栓形成;后天性肾囊肿;多发性肝囊肿	治愈	翁益民	翁益民	柯陈荣	股骨骨折切开复位髓内针内固定术;下腔静脉滤器置入术;股静脉穿刺术
1409	D07儿童骨科、骨盆外科	2021-05-09	2021-05-17	3099172	蒋爱华	女	64Y	髌骨骨折	脂肪肝;肝囊肿	治愈	孔建中	孔建中	陈墨川	关节软骨修复术;股四头肌成形术;髌骨骨折切开复位螺钉内固定术
1410	D07儿童骨科、骨盆外科	2021-05-13	2021-05-17	3099199	虞文鑫	男	10Y	蒙特贾骨折脱位	前臂桡神经损伤	治愈	张敬东	易先宏	方明桥	尺骨骨折闭合复位钢针内固定术
1411	D07儿童骨科、骨盆外科	2021-05-11	2021-05-17	3099209	庄思彤	女	7Y	肱骨外科颈骨折		治愈	张敬东	易先宏	方明桥	肱骨骨折闭合复位钢针内固定术
1412	D07儿童骨科、骨盆外科	2021-05-11	2021-05-17	3099222	付凌霄	男	5Y	腕和手水平肌肉和肌腱损伤	指骨骨折;开放性手部损伤	治愈	张敬东	易先宏	闫广奎	皮肤和皮下组织非切除性清创;手部肌腱成形术
1413	D07儿童骨科、骨盆外科	2021-05-15	2021-05-17	3099292	柯振	男	5Y	肱骨髁上骨折		治愈	张敬东	易先宏	方明桥	肱骨骨折闭合复位钢针内固定术
1414	D07儿童骨科、骨盆外科	2021-05-15	2021-05-17	3099304	杜宇博	男	6Y	肱骨髁上骨折	前臂桡神经损伤	治愈	张敬东	易先宏	方明桥	肱骨骨折闭合复位钢针内固定术
1415	D07儿童骨科、骨盆外科	2021-05-15	2021-05-17	3099350	蒋文静	女	2Y	肱骨髁上骨折		治愈	张敬东	易先宏	方明桥	肱骨骨折闭合复位钢针内固定术
1416	D07儿童骨科、骨盆外科	2021-05-05	2021-05-18	3099478	李红良	男	33Y	取除骨折内固定装置	手术后切口感染	其他	孔建中	孔建中	陈墨川	创面负压封闭引流[VSD];胫骨内固定物取出术
1417	D07儿童骨科、骨盆外科	2021-05-12	2021-05-18	3099501	杨帆	男	7Y	取除骨折内固定装置		其他	张敬东	易先宏	方明桥	尺骨内固定物取出术
1418	D07儿童骨科、骨盆外科	2021-05-03	2021-05-19	3099824	方陈女	女	68Y	骨盆骨折	肺挫伤;脂肪肝;高血压病;糖尿病;下肢动脉粥样硬化;肋骨骨折;下肢静脉血栓形成;股骨干骨折	治愈	孔建中	孔建中	陈墨川	骨盆骨折切开复位螺钉内固定术;股骨骨折切开复位髓内针内固定术;骨盆外固定架固定术
1419	D07儿童骨科、骨盆外科	2021-05-16	2021-05-19	3100006	章豪杰	男	6Y	肱骨外髁骨折		治愈	张敬东	易先宏	闫广奎	肱骨骨折闭合复位钢针内固定术
1420	D07儿童骨科、骨盆外科	2021-05-03	2021-05-19	3100010	方陈梅	女	64Y	胫腓骨干骨折	双踝骨折;多发性肋骨骨折;动脉粥样硬化;颅内占位性病变	治愈	孔建中	孔建中	陈墨川	胫骨骨折闭合复位髓内针内固定术
1421	D07儿童骨科、骨盆外科	2021-05-13	2021-05-19	3100011	陈星烨	女	11Y	股骨颈骨折		治愈	张敬东	易先宏	毛诚晃	股骨骨折闭合复位钢针内固定术
1422	D07儿童骨科、骨盆外科	2021-05-13	2021-05-20	3100315	庄庆涵	男	2Y	指骨骨折	开放性手部损伤	治愈	张敬东	易先宏	毛诚晃	皮肤和皮下组织非切除性清创;指骨骨折切开复位钢板内固定术
1423	D07儿童骨科、骨盆外科	2021-05-08	2021-05-22	3100738	袁晓军	男	47Y	跟骨骨折	距骨骨折	治愈	翁益民	翁益民	柯陈荣	跟骨骨折切开复位钢针内固定术
1424	D07儿童骨科、骨盆外科	2021-05-10	2021-05-22	3100759	彭振科	男	46Y	股骨颈骨折	乙型肝炎小三阳;前列腺结石	好转	翁益民	翁益民	柯陈荣	股骨骨折闭合复位钢针内固定术
1425	D07儿童骨科、骨盆外科	2021-05-10	2021-05-22	3100828	梁爱根	男	52Y	骨盆骨折		好转	翁益民	翁益民	柯陈荣	骨盆骨折切开复位钢针内固定术
1426	D07儿童骨科、骨盆外科	2021-05-15	2021-05-22	3100850	刘文博	男	9Y	股骨颈骨折		治愈	张敬东	易先宏	方明桥	股骨骨折闭合复位螺钉内固定术
1427	D07儿童骨科、骨盆外科	2021-05-16	2021-05-22	3100874	吕震霖	男	5Y	蒙特贾骨折脱位	前臂桡神经损伤	治愈	张敬东	易先宏	方明桥	桡尺关节脱位闭合复位术;尺骨骨折闭合复位术
1428	D07儿童骨科、骨盆外科	2021-05-06	2021-05-22	3100887	陈成也	男	3Y	特指趾骨骨折	开放性足损伤;特指手术后状态	治愈	张敬东	易先宏	方明桥	趾离断术;趾骨骨折闭合复位钢针内固定术;皮瓣修整术;甲成形术
1429	D07儿童骨科、骨盆外科	2021-05-18	2021-05-22	3100903	杨嘉浩	男	9Y	取除骨折内固定装置		其他	张敬东	易先宏	方明桥	胫骨内固定物取出术
1430	D07儿童骨科、骨盆外科	2021-05-11	2021-05-22	3100915	杨廷芬	女	29Y	特指趾骨骨折		好转	翁益民	翁益民	柯陈荣	趾骨骨折切开复位钢针内固定术
1431	D07儿童骨科、骨盆外科	2021-05-12	2021-05-22	3100987	郑爱玉	女	42Y	跖骨骨折	下肢动脉粥样硬化;脂肪肝	治愈	孔建中	孔建中	陈墨川	跖骨骨折切开复位钢针内固定术
1432	D07儿童骨科、骨盆外科	2021-05-19	2021-05-24	3101525	何苏盼	女	5Y	肱骨髁上骨折		治愈	张敬东	易先宏	方明桥	肱骨骨折闭合复位钢针内固定术
1433	D07儿童骨科、骨盆外科	2021-05-18	2021-05-24	3101598	程露逸	女	7Y	肱骨髁上骨折		治愈	张敬东	易先宏	毛诚晃	肱骨骨折闭合复位钢针内固定术
1434	D07儿童骨科、骨盆外科	2021-04-08	2021-05-24	3101639	陈韦政	男	1Y	开放性足损伤	特指手术后状态;胫腓骨下端骨折	治愈	张敬东	易先宏	毛诚晃	创面负压封闭引流[VSD];皮瓣修整术;肌腱、血管、神经探查术;皮肤和皮下坏死组织切除清创术;同种皮肤移植术
1435	D07儿童骨科、骨盆外科	2021-05-15	2021-05-24	3101747	李素玉	女	71Y	股骨颈骨折	下肢动脉粥样硬化;退行性主动脉瓣疾患;心功能不全;颈动脉硬化;2型糖尿病	治愈	孔建中	孔建中	陈墨川	股骨骨折闭合复位钢针内固定术
1436	D07儿童骨科、骨盆外科	2021-05-21	2021-05-25	3101808	程喆	男	4Y	肱骨髁上骨折		治愈	张敬东	易先宏	方明桥	肱骨骨折闭合复位钢针内固定术
1437	D07儿童骨科、骨盆外科	2021-05-14	2021-05-25	3101821	高云龙	男	57Y	锁骨骨折	特指手术后状态;高血压病;单纯性肾囊肿	治愈	孔建中	孔建中	陈墨川	锁骨骨折切开复位钢针内固定术
1438	D07儿童骨科、骨盆外科	2021-05-15	2021-05-25	3101889	黄定和	男	70Y	髌骨骨折	高血压病;腔隙性脑梗死;下肢动脉粥样硬化	治愈	孔建中	孔建中	陈墨川	股四头肌成形术;关节软骨修复术;髌骨骨折切开复位螺钉内固定术
1439	D07儿童骨科、骨盆外科	2021-05-20	2021-05-25	3101940	韩子炫	男	7Y	尺骨桡骨远端骨折		治愈	张敬东	易先宏	毛诚晃	桡骨骨折闭合复位钢针内固定术
1440	D07儿童骨科、骨盆外科	2021-05-19	2021-05-25	3101954	徐绿骋	男	10Y	尺骨桡骨远端骨折	前臂桡神经损伤	治愈	张敬东	易先宏	毛诚晃	桡骨骨折闭合复位钢针内固定术
1441	D07儿童骨科、骨盆外科	2021-05-22	2021-05-25	3102032	戴佳璇	女	11M	股骨骨折		治愈	张敬东	易先宏	方明桥	石膏绷带固定;股骨骨折闭合复位术
1442	D07儿童骨科、骨盆外科	2021-05-16	2021-05-26	3102302	陈佳节	女	68Y	股骨颈骨折	心功能不全;糖尿病	治愈	孔建中	孔建中	陈墨川	股骨骨折闭合复位钢针内固定术
1443	D07儿童骨科、骨盆外科	2021-05-18	2021-05-26	3102308	黄玲虹	女	48Y	取除骨折内固定装置	肾结石;胆囊息肉;高血压病;特指手术后状态	其他	翁益民	翁益民	柯陈荣	胫骨内固定物取出术
1444	D07儿童骨科、骨盆外科	2021-05-23	2021-05-26	3102309	王作镜	男	12Y	取除骨折内固定装置		其他	张敬东	易先宏	毛诚晃	胫骨内固定物取出术
1445	D07儿童骨科、骨盆外科	2021-05-19	2021-05-26	3102329	郑国华	男	35Y	取除骨折内固定装置	骨折畸形愈合;肾结石;脂肪肝	其他	翁益民	翁益民	柯陈荣	锁骨内固定物取出术
1446	D07儿童骨科、骨盆外科	2021-05-08	2021-05-26	3102397	胡小美	女	50Y	取除骨折内固定装置	肺结节;手术后伤口愈合不良	其他	翁益民	翁益民	柯陈荣	踝关节内固定物取出术
1447	D07儿童骨科、骨盆外科	2021-05-17	2021-05-26	3102438	陈明杰	男	48Y	锁骨骨折	特指手术后状态;脂肪肝;胆囊胆固醇沉着症	治愈	孔建中	孔建中	陈墨川	锁骨骨折切开复位钢针内固定术
1448	D07儿童骨科、骨盆外科	2021-05-13	2021-05-26	3102442	冯华中	男	48Y	桡骨下端骨折	肝囊肿;后天性肾囊肿;前列腺增生;腰椎间盘突出;前列腺结石;腰椎骨折;隐性脊柱裂	治愈	翁益民	翁益民	柯陈荣	桡骨骨折切开复位钢针内固定术
1449	D07儿童骨科、骨盆外科	2021-05-24	2021-05-27	3102728	郭文泉	男	6Y	肱骨髁上骨折		治愈	张敬东	易先宏	方明桥	肱骨骨折闭合复位钢针内固定术
1450	D07儿童骨科、骨盆外科	2021-05-13	2021-05-27	3102797	高进	男	38Y	肱骨髁间骨折	肘关节扭伤和劳损;脂肪肝;肱骨髁上骨折	治愈	孔建中	孔建中	陈墨川	肱骨骨折切开复位钢针内固定术;关节软骨修复术
1451	D07儿童骨科、骨盆外科	2021-04-29	2021-05-27	3102828	赵庆军	男	49Y	锁骨骨折	多发性肋骨骨折;液气胸;肺挫伤;肩神经损伤;肩回旋套肌腱损伤;肾结石	治愈	翁益民	翁益民	柯陈荣	肩胛骨骨折切开复位钢针内固定术;锁骨骨折切开复位钢针内固定术
1452	D07儿童骨科、骨盆外科	2021-05-24	2021-05-29	3103257	王子健	男	10Y	肱骨外科颈骨折		治愈	张敬东	易先宏	毛诚晃	肱骨骨折闭合复位钢针内固定术
1453	D07儿童骨科、骨盆外科	2021-05-18	2021-05-29	3103275	刘晨昂	男	4Y	股骨骨折		治愈	张敬东	易先宏	闫广奎	股骨骨折切开复位钢针内固定术
1454	D07儿童骨科、骨盆外科	2021-05-16	2021-05-29	3103283	叶玉英	女	80Y	闭合性胫骨平台骨折	胫骨上端骨折;高血压病;2型糖尿病;恶性肿瘤手术后随诊检查;下肢动脉粥样硬化;脂肪肝;肝囊肿;后天性肾囊肿	治愈	翁益民	翁益民	柯陈荣	胫骨骨折切开复位钢针内固定术
1455	D07儿童骨科、骨盆外科	2021-05-01	2021-05-29	3103410	陈梁	男	8Y	肱骨外科颈骨折	手术后切口感染	治愈	张敬东	易先宏	方明桥	肱骨骨折切开复位髓内针内固定术
1456	D07儿童骨科、骨盆外科	2021-05-14	2021-05-29	3103419	张廷珠	女	49Y	肱骨上端骨折	开放性肘损伤;肩袖损伤;特指手术后状态;2型糖尿病	治愈	孔建中	孔建中	陈墨川	肌腱成形术;皮肤和皮下坏死组织切除清创术;创面负压封闭引流[VSD];肩袖修补术;肱骨骨折切开复位钢针内固定术
1457	D07儿童骨科、骨盆外科	2021-05-16	2021-05-29	3103432	林秋华	女	78Y	股骨粗隆间骨折	股骨颈骨折;高血压病;2型糖尿病;肝硬化;肾功能异常;心律失常;老年性脑萎缩;下肢动脉粥样硬化;骨质疏松;特指手术后状态;下肢静脉曲张;硬膜下血肿;硬膜外血肿;腔隙性脑梗死	治愈	翁益民	翁益民	柯陈荣	股骨骨折闭合复位钢针内固定术
1458	D07儿童骨科、骨盆外科	2021-05-20	2021-05-29	3103434	陈少华	男	44Y	掌骨骨折	脂肪肝;多处挫伤;肾结石;特指手术后状态	好转	翁益民	翁益民	柯陈荣	掌骨骨折切开复位钢针内固定术
1459	D07儿童骨科、骨盆外科	2021-05-19	2021-05-29	3103444	徐红妹	女	85Y	股骨颈骨折	下肢动脉粥样硬化;心功能不全;主动脉瓣疾患;退行性主动脉瓣疾患;室间隔肥大;后天性肾囊肿;高血压病	治愈	孔建中	孔建中	陈墨川	全髋关节表面置换术;髋关节滑膜切除术
1460	D07儿童骨科、骨盆外科	2021-05-12	2021-05-29	3103445	徐春妹	女	74Y	锁骨骨折	老年性脑萎缩;肋骨骨折;创伤性胸腔积液;多处挫伤;下肢动脉粥样硬化;脂肪肝;头皮血肿;肺挫伤	治愈	翁益民	翁益民	柯陈荣	锁骨骨折切开复位钢针内固定术
1461	D07儿童骨科、骨盆外科	2021-05-20	2021-05-29	3103468	郑祎璇	女	8Y	双踝骨折	踝和足特指损伤	好转	张敬东	易先宏	方明桥
1462	D07儿童骨科、骨盆外科	2021-05-23	2021-05-29	3103471	李彬	男	9Y	肱骨外髁骨折	特指手术后状态	治愈	张敬东	易先宏	方明桥	肱骨骨折切开复位钢针内固定术
1463	D07儿童骨科、骨盆外科	2021-05-11	2021-05-29	3103506	金雪莲	女	81Y	股骨颈骨折	心功能不全;高血压病;胆囊结石;颈动脉硬化;下肢动脉粥样硬化;特指主动脉瓣疾患;二尖瓣返流;退行性主动脉瓣疾患	治愈	孔建中	孔建中	陈墨川	全髋关节表面置换术;髋关节滑膜切除术
1464	D07儿童骨科、骨盆外科	2021-05-27	2021-05-31	3103704	蔡呈选	男	23Y	骨盆骨折		好转	孔建中	孔建中	陈墨川
1465	D07儿童骨科、骨盆外科	2021-05-24	2021-05-31	3103809	陈泊言	男	7Y	取除骨折内固定装置		其他	张敬东	易先宏	毛诚晃	胫骨内固定物取出术
1466	D07儿童骨科、骨盆外科	2021-05-22	2021-05-31	3103924	李永星	男	56Y	跟骨骨折	慢性乙型病毒性肝炎;胆囊结石	治愈	翁益民	翁益民	柯陈荣	跟骨骨折闭合复位钢针内固定术
1467	D07儿童骨科、骨盆外科	2021-05-26	2021-05-31	3103986	徐梓恒	男	8Y	肱骨髁上骨折	上肢神经损伤	治愈	张敬东	易先宏	方明桥	肱骨骨折闭合复位钢针内固定术
1468	D07儿童骨科、骨盆外科	2021-05-22	2021-05-31	3104017	汤建初	男	51Y	跟腱挛缩	脂肪肝;骨折治疗后恢复期;取除骨折内固定装置	治愈	孔建中	孔建中	陈墨川	髌骨内固定物取出术;筋膜成形术;跟腱延长术
1469	D07儿童骨科、骨盆外科	2021-05-21	2021-05-31	3104019	江柳	女	6Y	胫腓骨干骨折		治愈	张敬东	易先宏	毛诚晃	石膏绷带固定;胫骨骨折闭合复位髓内针内固定术
1470	D07儿童骨科、骨盆外科	2021-05-13	2021-05-31	3104023	孙浩嘉	男	7Y	开放性胫腓骨干骨折		治愈	张敬东	李玉安	毛诚晃	肌腱、血管、神经探查术;胫骨骨折切开复位髓内针内固定术
1471	D07儿童骨科、骨盆外科	2021-05-15	2021-05-31	3104063	李晨阳	男	5Y	指骨骨折	腕和手水平特指手指伸肌和肌腱损伤;腕和手水平手桡神经损伤;腕和手水平特指血管损伤;特指单个手指部分或完全切断;腕和手水平特指手指屈肌和肌腱损伤	治愈	张敬东	易先宏	闫广奎	指神经缝合术;手部肌腱成形术;肌腱、血管、神经探查术;指骨骨折切开复位钢针内固定术
1472	D07儿童骨科、骨盆外科	2021-05-24	2021-06-01	3104194	廖子浩	男	3Y	股骨骨折		治愈	张敬东	易先宏	易先宏	股骨骨折闭合复位髓内针内固定术
1473	D07儿童骨科、骨盆外科	2021-05-27	2021-06-01	3104238	王锦皓	男	11Y	肱骨髁上骨折		治愈	张敬东	易先宏	方明桥	肱骨骨折闭合复位钢针内固定术
1474	D07儿童骨科、骨盆外科	2021-05-30	2021-06-01	3104239	傅羽柔	女	8Y	取除骨折内固定装置		其他	张敬东	易先宏	方明桥	尺骨内固定物取出术
1475	D07儿童骨科、骨盆外科	2021-05-27	2021-06-02	3104459	徐浩宇	男	11Y	鹰嘴骨折		治愈	张敬东	易先宏	李玉安	尺骨骨折切开复位钢针内固定术
1476	D07儿童骨科、骨盆外科	2021-05-25	2021-06-02	3104489	叶日梯	男	70Y	髋臼骨折	高血压病;胆汁淤积症;下肢动脉粥样硬化	好转	孔建中	孔建中	陈墨川
1477	D07儿童骨科、骨盆外科	2021-05-29	2021-06-02	3104518	陈睿	男	2Y	肱骨髁上骨折		治愈	张敬东	易先宏	方明桥	肱骨骨折闭合复位钢针内固定术
1478	D07儿童骨科、骨盆外科	2021-05-27	2021-06-02	3104623	包梓琪	女	9Y	肱骨髁上骨折		治愈	孔建中	孔建中	陈墨川	肱骨骨折切开复位钢针内固定术
1479	D07儿童骨科、骨盆外科	2021-05-26	2021-06-02	3104710	郑昕圻	男	7Y	开放性胫骨骨折	肌腱和肌肉损伤	治愈	张敬东	李玉安	毛诚晃	胫骨骨折闭合复位螺钉内固定术
1480	D07儿童骨科、骨盆外科	2021-05-31	2021-06-03	3104829	曹允权	男	7Y	肱骨髁上骨折		治愈	张敬东	易先宏	方明桥	肱骨骨折闭合复位钢针内固定术
1481	D07儿童骨科、骨盆外科	2021-05-29	2021-06-05	3105321	吴信杰	男	12Y	肱骨内髁骨折	肘关节脱位;鹰嘴骨折;前臂尺神经损伤	治愈	张敬东	易先宏	方明桥	上肢关节囊缝合术;肘关节固定术;尺神经松解术;肱骨骨折切开复位钢针内固定术
1482	D07儿童骨科、骨盆外科	2021-05-29	2021-06-05	3105430	黄睿泽	男	4Y	股骨颈骨折		治愈	张敬东	易先宏	方明桥	股骨骨折闭合复位钢针内固定术
1483	D07儿童骨科、骨盆外科	2021-05-19	2021-06-05	3105436	赵伟星	男	65Y	闭合性胫骨平台骨折	下肢动脉粥样硬化;前列腺结石;肝囊肿;脂肪肝	治愈	孔建中	孔建中	陈墨川	胫骨骨折切开复位钢针内固定术
1484	D07儿童骨科、骨盆外科	2021-05-29	2021-06-05	3105446	王佑	女	6Y	尺骨桡骨远端骨折		治愈	张敬东	易先宏	王伟	桡骨骨折闭合复位钢针内固定术
1485	D07儿童骨科、骨盆外科	2021-05-31	2021-06-05	3105469	刘瑶珊	男	29Y	取除骨折内固定装置	前列腺结石	其他	翁益民	翁益民	柯陈荣	掌骨内固定物取出术
1486	D07儿童骨科、骨盆外科	2021-05-30	2021-06-05	3105471	林宗湖	男	52Y	取除骨折内固定装置	胆囊息肉;脂肪肝	其他	翁益民	翁益民	柯陈荣	桡骨内固定物取出术
1487	D07儿童骨科、骨盆外科	2021-05-31	2021-06-05	3105478	董英	男	26Y	取除骨折内固定装置	前列腺结石	其他	翁益民	翁益民	柯陈荣	桡骨内固定物取出术
1488	D07儿童骨科、骨盆外科	2021-05-29	2021-06-05	3105503	王伦鹏	男	13Y	双踝骨折		治愈	张敬东	易先宏	易先宏	踝关节骨折切开复位钢针内固定术;踝关节骨折闭合复位钢针内固定术
1489	D07儿童骨科、骨盆外科	2021-06-01	2021-06-05	3105529	汪嘉诚	男	6Y	肱骨髁上骨折		治愈	张敬东	易先宏	方明桥	肱骨骨折闭合复位钢针内固定术
1490	D07儿童骨科、骨盆外科	2021-05-29	2021-06-05	3105549	章嘉瑞	男	6Y	肱骨髁上骨折		治愈	张敬东	易先宏	李玉安	肱骨骨折闭合复位钢针内固定术
1491	D07儿童骨科、骨盆外科	2021-05-30	2021-06-06	3105744	焦宇辉	男	13Y	股骨颈骨折		治愈	张敬东	易先宏	王伟	股骨骨折闭合复位钢针内固定术
1492	D07儿童骨科、骨盆外科	2021-05-30	2021-06-06	3105752	沈子贤	男	3Y	肱骨外髁骨折		治愈	张敬东	毛诚晃	李玉安	肱骨骨折切开复位钢针内固定术
1493	D07儿童骨科、骨盆外科	2021-06-01	2021-06-06	3105844	陈子韩	男	7Y	肱骨髁上骨折		治愈	张敬东	易先宏	李玉安	肱骨骨折闭合复位钢针内固定术
1494	D07儿童骨科、骨盆外科	2021-06-01	2021-06-07	3106014	戴恩慈	女	13Y	鹰嘴骨折	手浅表损伤;特指手术后状态	治愈	张敬东	易先宏	李玉安	尺骨骨折切开复位钢针内固定术
1495	D07儿童骨科、骨盆外科	2021-05-31	2021-06-07	3106016	王若霏	女	5Y	蒙特贾骨折脱位	前臂桡神经损伤	治愈	张敬东	易先宏	方明桥	尺骨骨折切开复位钢板内固定术
1496	D07儿童骨科、骨盆外科	2021-05-22	2021-06-07	3106161	廖洪营	男	53Y	三踝骨折	踝关节脱位;楔状骨骨折(足);跖骨脱位;跖骨骨折	治愈	翁益民	翁益民	柯陈荣	踝关节骨折切开复位钢针内固定术
1497	D07儿童骨科、骨盆外科	2021-05-21	2021-06-07	3106166	仇顺菊	女	68Y	股骨髁骨折	插入矫形外科植入物后骨折;后天性肾囊肿	治愈	翁益民	翁益民	柯陈荣	股骨骨折切开复位钢针内固定术
1498	D07儿童骨科、骨盆外科	2021-05-26	2021-06-07	3106177	邓伦顶	男	87Y	股骨颈骨折	高血压病;多发性肝囊肿;后天性肾囊肿;胫前动脉狭窄;前列腺增生;下肢动脉粥样硬化;下肢静脉血栓形成	治愈	孔建中	孔建中	陈墨川	髋关节滑膜切除术;人工股骨头置换术
1499	D07儿童骨科、骨盆外科	2021-05-25	2021-06-07	3106297	周存兵	男	42Y	股骨髁骨折	慢性筛窦炎;特指手术后状态;脂肪肝	治愈	孔建中	孔建中	陈墨川	关节软骨修复术;股骨骨折切开复位钢针内固定术;股骨植骨术
1500	D07儿童骨科、骨盆外科	2021-06-03	2021-06-08	3106413	赵会明	男	12Y	尺骨桡骨闭合性骨折		治愈	张敬东	方明桥	李玉安	尺骨骨折闭合复位髓内针内固定术;桡骨骨折闭合复位髓内针内固定术
1501	D07儿童骨科、骨盆外科	2021-05-21	2021-06-08	3106558	周送芹	女	58Y	股骨粗隆间骨折	肺大泡;肾结石;股骨粗隆下骨折;骨折治疗后恢复期;跟骨骨折	治愈	翁益民	翁益民	柯陈荣	跟骨骨折切开复位钢板内固定术;股骨骨折闭合复位钢针内固定术
1502	D07儿童骨科、骨盆外科	2021-05-25	2021-06-08	3106560	杨德光	男	73Y	特指趾骨骨折	开放性足损伤;下肢关节和韧带脱位、扭伤和劳损;肝回声不均;跖骨骨折	治愈	孔建中	孔建中	陈墨川	创面负压封闭引流[VSD];趾骨骨折闭合复位钢针内固定术;皮肤和皮下坏死组织切除清创术;跖关节脱位闭合复位术;跖骨骨折切开复位钢板内固定术
1503	D07儿童骨科、骨盆外科	2021-05-24	2021-06-08	3106638	林秀高	男	55Y	特指趾骨骨折	趾挫伤伴趾甲损坏;前列腺增生	治愈	孔建中	孔建中	陈墨川	甲床去除术;趾骨骨折切开复位钢针内固定术
1504	D07儿童骨科、骨盆外科	2021-05-26	2021-06-08	3106658	黄鹏远	男	13Y	股骨干骨折		治愈	张敬东	易先宏	王伟	股骨骨折切开复位钢针内固定术
1505	D07儿童骨科、骨盆外科	2021-06-03	2021-06-09	3106863	朱旭文	男	4Y	肱骨髁上骨折		治愈	张敬东	易先宏	方明桥	肱骨骨折切开复位钢针内固定术
1506	D07儿童骨科、骨盆外科	2021-06-05	2021-06-09	3106865	杜欣忆	女	6Y	取除骨折内固定装置		其他	张敬东	易先宏	易先宏	肱骨内固定物取出术
1507	D07儿童骨科、骨盆外科	2021-05-30	2021-06-09	3106866	成晟	男	7Y	肱骨内髁骨折	头部外伤;鹰嘴骨折;桡骨上端骨折;枕骨骨折;头皮血肿;多发性损伤	治愈	张敬东	易先宏	李玉安	尺神经松解术;肘关节成形术;肱骨骨折切开复位钢针内固定术
1508	D07儿童骨科、骨盆外科	2021-06-04	2021-06-09	3106904	彭婷	女	11Y	肱骨外科颈骨折	前臂桡神经损伤;耻骨骨折	治愈	张敬东	易先宏	王伟	肱骨骨折闭合复位钢针内固定术
1509	D07儿童骨科、骨盆外科	2021-06-02	2021-06-09	3106929	吴昊特	男	13Y	尺骨桡骨远端骨折		治愈	张敬东	易先宏	方明桥	尺骨骨折闭合复位钢针内固定术
1510	D07儿童骨科、骨盆外科	2021-05-27	2021-06-09	3107018	邓斌	男	36Y	跟骨骨折	胆囊息肉	治愈	孔建中	孔建中	陈墨川	跟骨骨折切开复位钢针内固定术;关节软骨修复术
1511	D07儿童骨科、骨盆外科	2021-06-03	2021-06-09	3108270	陈时成	男	62Y	髂骨骨折	心脏骤停;休克;循环系统特指疾患;心室颤动;髋臼骨折;耻骨骨折	死亡	孔建中	翁益民	柯陈荣	股骨髁上牵引;骨盆骨折切开复位钢板内固定术
1512	D07儿童骨科、骨盆外科	2021-06-04	2021-06-10	3107181	李卓阳	男	4Y	尺骨桡骨骨干骨折		治愈	张敬东	易先宏	方明桥	石膏绷带固定;尺骨骨折切开复位钢针内固定术
1513	D07儿童骨科、骨盆外科	2021-05-30	2021-06-10	3107281	潘维维	女	6Y	开放性胫腓骨下端骨折	胆囊结石;结肠积气	治愈	张敬东	易先宏	方明桥	皮肤和皮下坏死组织切除清创术;胫骨骨折切开复位钢针内固定术
1514	D07儿童骨科、骨盆外科	2021-05-27	2021-06-10	3107295	王可操	男	73Y	股骨粗隆间骨折	肾结石;脑梗死;下肢动脉粥样硬化;2型糖尿病;前列腺增生;前列腺结石;后天性肾囊肿	治愈	翁益民	翁益民	柯陈荣	股骨骨折闭合复位钢针内固定术
1515	D07儿童骨科、骨盆外科	2021-06-09	2021-06-12	3107555	曾贤迅	男	4Y	肱骨髁上骨折		治愈	张敬东	易先宏	方明桥	肱骨骨折闭合复位钢针内固定术
1516	D07儿童骨科、骨盆外科	2021-06-03	2021-06-12	3107578	张玉钗	女	92Y	股骨粗隆间骨折	高血压病;肝钙化灶;下肢动脉粥样硬化;肾结石	治愈	孔建中	孔建中	陈墨川	股骨骨折闭合复位钢针内固定术
1517	D07儿童骨科、骨盆外科	2021-06-10	2021-06-12	3107713	胡原赫	男	5Y	肱骨髁上骨折		治愈	张敬东	易先宏	方明桥	肱骨骨折切开复位钢针内固定术
1518	D07儿童骨科、骨盆外科	2021-06-07	2021-06-12	3107791	江晟云	男	5Y	尺骨桡骨闭合性骨折		治愈	张敬东	易先宏	方明桥	桡骨骨折闭合复位术
1519	D07儿童骨科、骨盆外科	2021-05-27	2021-06-12	3107874	汪宣好	男	36Y	肱骨上端骨折	肩关节半脱位	治愈	孔建中	孔建中	陈墨川	肱骨骨折切开复位钢针内固定术;肩关节脱位切开复位内固定术
1520	D07儿童骨科、骨盆外科	2021-06-09	2021-06-13	3108051	夏龙妹	女	83Y	股骨颈骨折	脑梗死后遗症;创伤性蛛网膜下腔出血;头皮血肿;脑动脉瘤;下肢动脉粥样硬化;肾结石	好转	孔建中	孔建中	陈墨川
1521	D07儿童骨科、骨盆外科	2021-05-20	2021-06-13	3108260	黄杰	男	21Y	股骨粗隆下骨折	胆汁淤积症;特指骨囊肿;多处浅表损伤	治愈	翁益民	翁益民	柯陈荣	股骨骨折切开复位钢针内固定术
1522	D07儿童骨科、骨盆外科	2021-06-07	2021-06-14	3108378	腾孟川	男	4Y	胫腓骨干骨折	小腿开放性损伤	治愈	张敬东	毛诚晃	李玉安	胫骨骨折闭合复位螺钉内固定术
1523	D07儿童骨科、骨盆外科	2021-06-10	2021-06-14	3108419	王佳蓉	女	9Y	肱骨髁上骨折		治愈	张敬东	易先宏	王伟	肱骨骨折闭合复位钢针内固定术
1524	D07儿童骨科、骨盆外科	2021-06-04	2021-06-14	3108598	韩一帆	男	37Y	鹰嘴骨折	胆囊息肉;桡骨头骨折;肘关节骨折	治愈	孔建中	孔建中	陈墨川	尺骨骨折切开复位钢针内固定术;桡骨植骨术;桡骨骨折切开复位钢针内固定术
1525	D07儿童骨科、骨盆外科	2021-06-02	2021-06-14	3108619	陈尧勤	男	54Y	股骨粗隆间骨折	2型糖尿病;股骨粗隆下骨折;陈旧性肋骨骨折;肺气肿	治愈	翁益民	翁益民	柯陈荣	股骨骨折闭合复位钢针内固定术
1526	D07儿童骨科、骨盆外科	2021-06-09	2021-06-15	3108745	黄加武	男	11Y	尺骨桡骨闭合性骨折		治愈	张敬东	易先宏	方明桥	桡骨骨折切开复位钢针内固定术
1527	D07儿童骨科、骨盆外科	2021-05-30	2021-06-15	3108751	孙琴华	女	35Y	肱骨下端骨折	前臂桡神经损伤;胆囊结石;流产	治愈	孔建中	孔建中	陈墨川	肱骨骨折切开复位钢针内固定术
1528	D07儿童骨科、骨盆外科	2021-05-31	2021-06-15	3108762	吴家怡	女	9Y	踝骨闭合性骨折	肌腱和肌肉损伤;腓骨骨折	治愈	张敬东	易先宏	易先宏	石膏绷带固定;踝关节骨折闭合复位钢针内固定术
1529	D07儿童骨科、骨盆外科	2021-06-07	2021-06-15	3108775	曾碎花	女	67Y	三踝骨折	骰骨骨折;脂肪肝	治愈	翁益民	翁益民	柯陈荣	踝关节骨折切开复位钢针内固定术
1530	D07儿童骨科、骨盆外科	2021-06-07	2021-06-15	3108918	杨秀梅	女	47Y	锁骨骨折		治愈	孔建中	孔建中	陈墨川	锁骨骨折切开复位钢针内固定术
1531	D07儿童骨科、骨盆外科	2021-06-08	2021-06-16	3109046	曾陈珏	男	6Y	肱骨外髁骨折		治愈	张敬东	闫广奎	李玉安	肱骨骨折切开复位钢针内固定术
1532	D07儿童骨科、骨盆外科	2021-06-10	2021-06-16	3109058	杨敬轩	男	3Y	股骨粗隆下骨折	胫骨骨折;足部皮肤撕裂伤;趾甲血肿	治愈	张敬东	易先宏	方明桥	股骨骨折闭合复位钢针内固定术
1533	D07儿童骨科、骨盆外科	2021-06-08	2021-06-16	3109272	刘金保	男	44Y	股骨颈骨折	下肢动脉粥样硬化	治愈	孔建中	孔建中	陈墨川	股骨骨折闭合复位钢针内固定术
1534	D07儿童骨科、骨盆外科	2021-06-07	2021-06-16	3109304	滕凌晨	女	11Y	胫骨下端骨折	胫腓骨下端骨折;肝钙化灶	治愈	张敬东	易先宏	李玉安	石膏绷带固定;腓骨骨折闭合复位术;胫骨骨折闭合复位螺钉内固定术
1535	D07儿童骨科、骨盆外科	2021-06-13	2021-06-17	3109418	庄元赫	男	2Y	股骨骨折		治愈	张敬东	易先宏	王伟	股骨骨折闭合复位髓内针内固定术
1536	D07儿童骨科、骨盆外科	2021-06-11	2021-06-17	3109626	杨婉葶	女	2Y	肱骨髁上骨折	上肢神经损伤	治愈	张敬东	方明桥	李玉安	肱骨骨折闭合复位钢针内固定术
1537	D07儿童骨科、骨盆外科	2021-06-15	2021-06-18	3109743	孙高晨	男	3Y	取除骨折内固定装置		其他	张敬东	易先宏	易先宏	股骨内固定物取出术
1538	D07儿童骨科、骨盆外科	2021-06-02	2021-06-19	3110029	全海南	男	62Y	胫骨下端骨折	高血压病;外踝骨折;脂肪肝;下肢动脉粥样硬化	治愈	翁益民	翁益民	柯陈荣	胫骨骨折切开复位钢针内固定术
1539	D07儿童骨科、骨盆外科	2021-06-05	2021-06-19	3110128	徐芙蓉	女	46Y	髌骨骨折	高血压病	治愈	翁益民	翁益民	柯陈荣	髌骨骨折切开复位螺钉内固定术
1540	D07儿童骨科、骨盆外科	2021-06-07	2021-06-19	3110131	王丽华	女	44Y	胫骨骨折		治愈	孔建中	孔建中	陈墨川	胫骨骨折切开复位钢板内固定术
1541	D07儿童骨科、骨盆外科	2021-06-06	2021-06-19	3110168	叶凤梅	女	48Y	胫腓骨干骨折	特指手术后状态;下肢肌肉损伤;脂肪肝;外踝骨折	治愈	翁益民	翁益民	柯陈荣	踝关节骨折切开复位髓内针内固定术;胫骨骨折切开复位钢针内固定术
1542	D07儿童骨科、骨盆外科	2021-06-07	2021-06-19	3110172	李爱军	男	39Y	胫腓骨下端骨折	特指手术后状态;骨折畸形愈合;股骨头无菌性坏死	治愈	翁益民	翁益民	柯陈荣	胫骨骨折切开复位钢针内固定术
1543	D07儿童骨科、骨盆外科	2021-06-05	2021-06-19	3110246	朱小眉	女	60Y	跟骨骨折	后天性肾囊肿	治愈	孔建中	孔建中	陈墨川	关节软骨修复术;跟骨骨折切开复位钢板内固定术;创面负压封闭引流[VSD]
1544	D07儿童骨科、骨盆外科	2021-06-12	2021-06-20	3110355	林子钥	女	2Y	肱骨外髁骨折	胃肠炎	治愈	张敬东	李玉安	毛诚晃	肱骨骨折切开复位钢针内固定术
1545	D07儿童骨科、骨盆外科	2021-05-26	2021-06-20	3110436	左爱关	男	50Y	开放性髂骨骨折	髋周软组织损伤	好转	孔建中	孔建中	陈墨川	皮肤和皮下坏死组织切除清创术
1546	D07儿童骨科、骨盆外科	2021-06-16	2021-06-20	3110540	邱泉闻	女	5Y	肱骨髁上骨折		治愈	张敬东	易先宏	毛诚晃	肱骨骨折闭合复位钢针内固定术
1547	D07儿童骨科、骨盆外科	2021-05-25	2021-06-20	3110661	陈秀翠	女	91Y	股骨髁骨折	桡骨下端骨折;高血压病	治愈	孔建中	孔建中	陈墨川	股骨骨折切开复位钢针内固定术;关节软骨修复术
1548	D07儿童骨科、骨盆外科	2021-05-25	2021-06-21	3110809	陈碎芬	女	70Y	闭合性胫骨平台骨折	脂肪肝;下肢动脉粥样硬化;腓骨骨折;特指关节软骨疾患;膝外侧半月板损伤;胫骨骨折;2型糖尿病	治愈	孔建中	孔建中	陈墨川	关节软骨修复术;膝关节半月板成形术;胫骨骨折切开复位钢板内固定术;胫骨骨折切开复位钢针内固定术
1549	D07儿童骨科、骨盆外科	2021-06-14	2021-06-21	3110920	刘东勇	男	4Y	肱骨外髁骨折		治愈	张敬东	易先宏	易先宏	肱骨骨折切开复位钢针内固定术
1550	D07儿童骨科、骨盆外科	2021-06-06	2021-06-21	3110943	林建荣	女	56Y	踝骨闭合性骨折	脂肪肝;跖骨骨折	治愈	孔建中	孔建中	陈墨川	踝关节骨折切开复位钢针内固定术
1551	D07儿童骨科、骨盆外科	2021-06-14	2021-06-21	3111003	郑祥林	男	76Y	股骨粗隆间骨折	高血压病;阿尔茨海默病;脑卒中后遗症;肝囊肿;前列腺增生;膀胱特指疾病;尿特指异常所见	治愈	孔建中	孔建中	陈墨川	股骨骨折闭合复位钢针内固定术
1552	D07儿童骨科、骨盆外科	2021-06-17	2021-06-22	3111085	冯志良	男	70Y	开放性足损伤	前列腺结石;高血压病;跖骨骨折;脂肪肝;单纯性肾囊肿;前列腺增生;糖尿病	治愈	潘骏	冯永增	金海东	创面负压封闭引流[VSD]
1553	D07儿童骨科、骨盆外科	2021-06-14	2021-06-22	3111129	吴阿青	男	65Y	取除骨折内固定装置	下肢动脉粥样硬化;脂肪肝;前列腺结石;下肢动脉硬化闭塞症;胆汁淤积症	其他	孔建中	孔建中	陈墨川	胫骨内固定物取出术
1554	D07儿童骨科、骨盆外科	2021-06-18	2021-06-22	3111171	刘心宇	男	5Y	肱骨髁上骨折		治愈	张敬东	易先宏	方明桥	肱骨骨折闭合复位钢针内固定术
1555	D07儿童骨科、骨盆外科	2021-06-17	2021-06-22	3111204	夏文博	男	5Y	肱骨髁上骨折	后天性肘内翻	治愈	张敬东	易先宏	方明桥	肱骨骨折闭合复位钢针内固定术
1556	D07儿童骨科、骨盆外科	2021-06-15	2021-06-22	3111374	林哲轩	男	3Y	胫腓骨干骨折	头皮血肿;下肢浅表损伤	治愈	张敬东	易先宏	毛诚晃	胫骨骨折切开复位钢针内固定术
1557	D07儿童骨科、骨盆外科	2021-06-19	2021-06-23	3111515	蒋才森	男	5Y	取除骨折内固定装置		其他	张敬东	易先宏	李玉安	股骨内固定物取出术
1558	D07儿童骨科、骨盆外科	2021-06-12	2021-06-23	3111542	方梦琪	女	4Y	病理性骨折	取除骨折内固定装置;骨纤维异样增殖症	治愈	张敬东	张敬东	李玉安	股骨病损切除术;股骨骨折闭合复位螺钉内固定术;股骨植骨术
1559	D07儿童骨科、骨盆外科	2021-06-19	2021-06-23	3111641	许允哲	男	1Y	股骨干骨折	开放性阴囊损伤	治愈	张敬东	易先宏	毛诚晃	股骨骨折切开复位钢针内固定术
1560	D07儿童骨科、骨盆外科	2021-06-16	2021-06-23	3111713	陆文博	男	8Y	肱骨外髁骨折		治愈	张敬东	易先宏	王伟	肱骨骨折切开复位钢针内固定术
1561	D07儿童骨科、骨盆外科	2021-06-08	2021-06-23	3111771	徐爱文	女	73Y	跟骨骨折	脂肪肝;胆囊结石;肺肿物	治愈	孔建中	孔建中	陈墨川	跟骨骨折切开复位钢板内固定术
1562	D07儿童骨科、骨盆外科	2021-06-21	2021-06-24	3111870	蔡璟依	女	3Y	肱骨髁上骨折		治愈	张敬东	易先宏	方明桥	肱骨骨折闭合复位钢针内固定术
1563	D07儿童骨科、骨盆外科	2021-06-15	2021-06-24	3112009	林仁香	女	58Y	取除骨折内固定装置	脂肪肝	其他	孔建中	孔建中	陈墨川	踝关节内固定物取出术;踝关节囊松解术
1564	D07儿童骨科、骨盆外科	2021-06-15	2021-06-26	3112483	方逸恒	男	12Y	三踝骨折		治愈	张敬东	易先宏	方明桥	踝关节骨折闭合复位钢针内固定术;踝关节骨折切开复位钢针内固定术
1565	D07儿童骨科、骨盆外科	2021-06-16	2021-06-26	3112493	黄沙鸥	女	33Y	内踝骨折		治愈	翁益民	翁益民	柯陈荣	踝关节骨折切开复位钢针内固定术
1566	D07儿童骨科、骨盆外科	2021-06-16	2021-06-26	3112504	胡梓妍	女	4Y	后天性肘内翻	取除骨折内固定装置	治愈	张敬东	易先宏	方明桥	肱骨截骨术;肘关节成形术
1567	D07儿童骨科、骨盆外科	2021-06-19	2021-06-26	3112523	张晶	女	62Y	取除骨折内固定装置	肾结石;下肢动脉粥样硬化;冠状动脉粥样硬化性心脏病	其他	翁益民	翁益民	柯陈荣	肱骨内固定物取出术
1568	D07儿童骨科、骨盆外科	2021-06-19	2021-06-27	3112737	林学庄	男	62Y	取除骨折内固定装置	肾结石;下肢动脉粥样硬化;前列腺增生	其他	翁益民	翁益民	柯陈荣	尺骨内固定物取出术;骨盆内固定物取出术
1569	D07儿童骨科、骨盆外科	2021-06-19	2021-06-27	3112759	吴林勇	男	47Y	股骨颈骨折	胆囊结石	治愈	孔建中	孔建中	陈墨川	股骨骨折闭合复位钢针内固定术
1570	D07儿童骨科、骨盆外科	2021-06-13	2021-06-27	3112773	王主宇	男	54Y	股骨粗隆间骨折	2型糖尿病;手术后恢复期;脂肪肝;前列腺结石;胆囊结石	治愈	孔建中	孔建中	陈墨川	股骨骨折切开复位钢针内固定术
1571	D07儿童骨科、骨盆外科	2021-06-14	2021-06-27	3112779	李凤菊	女	67Y	股骨颈骨折	2型糖尿病;下肢动脉粥样硬化;肝钙化灶	治愈	孔建中	孔建中	陈墨川	髋关节滑膜切除术;全髋关节表面置换术
1572	D07儿童骨科、骨盆外科	2021-06-19	2021-06-27	3112782	谢妍凤	女	48Y	双踝骨折		治愈	孔建中	孔建中	陈墨川	踝关节骨折切开复位钢针内固定术
1573	D07儿童骨科、骨盆外科	2021-06-19	2021-06-27	3112789	陈立瑞	男	46Y	骨折治疗后恢复期	肝血管瘤	其他	翁益民	翁益民	柯陈荣	腓骨内固定物取出术;跖骨内固定物取出术
1574	D07儿童骨科、骨盆外科	2021-06-21	2021-06-28	3113203	温从仁	男	24Y	鹰嘴骨折		治愈	孔建中	孔建中	陈墨川	尺骨骨折闭合复位钢针内固定术
1575	D07儿童骨科、骨盆外科	2021-06-14	2021-06-28	3113215	申银周	男	50Y	开放性胫腓骨干骨折	下肢动脉粥样硬化	治愈	孔建中	孔建中	陈墨川	腓骨骨折闭合复位钢针内固定术;胫骨骨折闭合复位螺钉内固定术
1576	D07儿童骨科、骨盆外科	2021-06-06	2021-06-28	3113242	徐丽	女	28Y	骶骨骨折	腰骶部脊髓神经丛损伤;肝钙化灶;骨盆骨折	治愈	孔建中	孔建中	陈墨川	骶椎植骨术;后入路腰骶融合术;骨盆外固定架固定术
1577	D07儿童骨科、骨盆外科	2021-06-02	2021-06-29	3113417	胡志领	男	70Y	开放性胫腓骨干骨折	特指手术后状态;高血压病;跖骨骨折;下肢静脉血栓形成	治愈	翁益民	翁益民	柯陈荣	股静脉穿刺术;下腔静脉滤器置入术;胫骨骨折切开复位钢针内固定术
1578	D07儿童骨科、骨盆外科	2021-06-28	2021-06-29	3113420	袁仁浪	男	38Y	跟骨骨折		好转	翁益民	翁益民	柯陈荣
1579	D07儿童骨科、骨盆外科	2021-06-15	2021-06-29	3113435	叶莲芬	女	77Y	股骨粗隆间骨折	下肢动脉粥样硬化;2型糖尿病;肺钙化	治愈	翁益民	翁益民	柯陈荣	股骨骨折闭合复位钢针内固定术
1580	D07儿童骨科、骨盆外科	2021-06-22	2021-06-29	3113513	刘开键	男	8Y	肱骨外髁骨折		治愈	张敬东	易先宏	李玉安	肱骨骨折切开复位钢针内固定术;关节软骨修复术
1581	D07儿童骨科、骨盆外科	2021-06-15	2021-06-29	3113621	陈荣辉	男	44Y	胫腓骨干骨折	下肢皮肤撕裂伤;脂肪肝;胆囊结石	治愈	孔建中	孔建中	陈墨川	胫骨骨折闭合复位螺钉内固定术
1582	D07儿童骨科、骨盆外科	2021-06-26	2021-06-29	3113729	黄语可	女	7Y	肱骨髁上骨折		治愈	张敬东	易先宏	易先宏	肱骨骨折闭合复位钢针内固定术
1583	D07儿童骨科、骨盆外科	2021-06-01	2021-06-30	3113900	张明来	男	43Y	开放性胫腓骨干骨折	前列腺结石;胆囊息肉;肝回声不均;特指手术后状态;跖骨骨折;肝硬化;肝肿物	治愈	翁益民	翁益民	柯陈荣	创面负压封闭引流[VSD];胫骨骨折切开复位钢针内固定术;胫骨外固定架固定术
1584	D07儿童骨科、骨盆外科	2021-06-23	2021-06-30	3114040	叶奕辰	男	14Y	尺骨桡骨远端骨折	上肢神经损伤;多处皮肤破损	治愈	张敬东	易先宏	方明桥	尺骨骨折切开复位钢板内固定术;桡骨骨折切开复位钢板内固定术
1585	D07儿童骨科、骨盆外科	2021-06-25	2021-06-30	3114045	李致豪	男	3Y	肱骨外髁骨折	鹰嘴骨折	治愈	张敬东	易先宏	方明桥	石膏绷带固定;尺骨骨折闭合复位术;肱骨骨折切开复位钢针内固定术
1586	D07儿童骨科、骨盆外科	2021-06-24	2021-06-30	3114069	叶松航	男	9M	股骨干骨折		未愈	张敬东	易先宏	易先宏	股骨骨折闭合复位术;石膏绷带固定
1587	D07儿童骨科、骨盆外科	2021-06-29	2021-07-03	3114695	徐泽坤	男	11Y	取除骨折内固定装置		其他	张敬东	李玉安	毛诚晃	桡骨内固定物取出术
1588	D07儿童骨科、骨盆外科	2021-06-29	2021-07-03	3114729	叶克椿	男	13Y	取除骨折内固定装置		其他	张敬东	毛诚晃	方明桥	尺骨内固定物取出术
1589	D07儿童骨科、骨盆外科	2021-06-28	2021-07-03	3114776	张卓涵	女	6Y	取除骨折内固定装置		其他	张敬东	易先宏	毛诚晃	胫骨内固定物取出术
1590	D07儿童骨科、骨盆外科	2021-06-23	2021-07-03	3114785	王远瞰	男	9Y	桡骨颈骨折	多指[趾]畸形	治愈	张敬东	易先宏	毛诚晃	皮瓣修整术;桡骨骨折闭合复位术;瘢痕松解术;手部腱鞘松解术
1591	D07儿童骨科、骨盆外科	2021-06-25	2021-07-03	3114813	林昊	男	10Y	尺骨桡骨远端骨折		治愈	张敬东	王伟	毛诚晃	石膏绷带固定;桡骨骨折切开复位钢针内固定术;尺骨骨折闭合复位术
1592	D07儿童骨科、骨盆外科	2021-06-28	2021-07-03	3114819	郑煜凯	男	13Y	尺骨桡骨闭合性骨折		治愈	张敬东	闫广奎	毛诚晃	桡骨骨折闭合复位钢针内固定术
1593	D07儿童骨科、骨盆外科	2021-06-30	2021-07-03	3114838	陈慧敏	女	12Y	肱骨髁上骨折	肱骨髁间骨折	治愈	张敬东	易先宏	王伟	肱骨骨折闭合复位钢针内固定术
1594	D07儿童骨科、骨盆外科	2021-06-30	2021-07-03	3114880	徐文哲	男	9Y	跟骨骨折	开放性足损伤;变态反应	治愈	张敬东	易先宏	毛诚晃	皮肤和皮下组织非切除性清创
1595	D07儿童骨科、骨盆外科	2021-06-14	2021-07-03	3114890	付星茹	女	8Y	跖骨骨折	骰骨骨折;楔状骨骨折(足);骨筋膜室综合征	治愈	张敬东	易先宏	毛诚晃	创面负压封闭引流[VSD];跖骨骨折切开复位钢针内固定术;皮肤和皮下组织非切除性清创
1596	D07儿童骨科、骨盆外科	2021-06-20	2021-07-03	3114994	季永康	男	44Y	踝骨闭合性骨折	前列腺增生	治愈	孔建中	孔建中	陈墨川	踝关节骨折切开复位钢板内固定术
1597	D07儿童骨科、骨盆外科	2021-06-20	2021-07-03	3115019	孙云英	女	74Y	股骨颈骨折	高血压病;2型糖尿病性肾病;锁骨骨折;后天性肾囊肿;肾结石;肾衰竭	治愈	孔建中	孔建中	陈墨川	人工股骨头置换术
1598	D07儿童骨科、骨盆外科	2021-06-15	2021-07-03	3115053	董希凯	男	40Y	跟骨骨折	脂肪肝;前列腺结石	治愈	孔建中	孔建中	陈墨川	跟骨骨折切开复位钢板内固定术;关节软骨修复术;跟骨植骨术;创面负压封闭引流[VSD]
1599	D07儿童骨科、骨盆外科	2021-06-26	2021-07-04	3115220	李美娇	女	74Y	股骨粗隆间骨折	高血压病;下肢动脉粥样硬化;单纯性肾囊肿;人工髋关节;肝囊肿;胆囊息肉	治愈	孔建中	孔建中	陈墨川	股骨骨折闭合复位钢针内固定术
1600	D07儿童骨科、骨盆外科	2021-06-02	2021-07-04	3115221	谢珠香	女	70Y	股骨粗隆间骨折	精神分裂症;下肢动脉粥样硬化;泌尿道感染	治愈	孔建中	孔建中	陈墨川	股骨骨折闭合复位钢针内固定术
1601	D07儿童骨科、骨盆外科	2021-06-30	2021-07-04	3115248	项士杰	男	14Y	取除骨折内固定装置		其他	张敬东	李玉安	毛诚晃	尺骨内固定物取出术
1602	D07儿童骨科、骨盆外科	2021-06-14	2021-07-04	3115366	吴小如	女	58Y	肱骨干骨折	脂肪肝;骶骨骨折;耻骨骨折;髋臼骨折	治愈	孔建中	孔建中	陈墨川	肱骨骨折切开复位钢针内固定术
1603	D07儿童骨科、骨盆外科	2021-06-15	2021-07-04	3115374	薛潇	男	17Y	跟骨骨折	特指手术后状态;腰椎骨折	治愈	孔建中	孔建中	陈墨川	跟骨骨折切开复位钢板内固定术;关节软骨修复术;跟骨植骨术
1604	D07儿童骨科、骨盆外科	2021-05-31	2021-07-04	3115376	王道影	男	33Y	骶骨骨折	下肢静脉血栓形成;脂肪肝;胆汁淤积症;骨盆骨折;腰骶神经根损伤;肱骨髁间骨折;尺骨桡骨远端骨折;创伤性胸腔积液	治愈	孔建中	孔建中	陈墨川	桡骨骨折切开复位钢针内固定术;后入路腰椎融合术;下肢静脉造影;下肢静脉滤器置入术;肱骨骨折切开复位钢板内固定术;股静脉穿刺术;肱骨植骨术;腰椎椎板切除减压术;骨盆外固定架固定术;桡骨植骨术;关节软骨修复术
1605	D07儿童骨科、骨盆外科	2021-06-30	2021-07-04	3115381	伍若琳	女	6Y	尺骨上端骨折	桡骨颈骨折	治愈	张敬东	易先宏	毛诚晃	桡骨骨折闭合复位钢针内固定术;石膏绷带固定
1606	D07儿童骨科、骨盆外科	2021-07-03	2021-07-05	3115637	王泽民	男	13Y	取除骨折内固定装置		其他	张敬东	毛诚晃	毛诚晃	锁骨内固定物取出术
1607	D07儿童骨科、骨盆外科	2021-06-12	2021-07-05	3115646	叶鼎凯	男	9Y	特指趾骨骨折	开放性足损伤;趾肌腱断裂;下肢神经损伤;下肢血管损伤	治愈	张敬东	毛诚晃	毛诚晃	创面负压封闭引流[VSD];甲床去除术;同种皮肤移植术
1608	D07儿童骨科、骨盆外科	2021-06-21	2021-07-05	3115833	王贤增	男	76Y	股骨颈骨折	前列腺结石;下肢动脉粥样硬化;高血压病;脂肪肝;前列腺增生	治愈	孔建中	孔建中	陈墨川	人工股骨头置换术
1609	D07儿童骨科、骨盆外科	2021-07-02	2021-07-06	3116093	章嘉跃	男	2Y	掌骨骨折	开放性手部损伤	好转	张敬东	张敬东	毛诚晃
1610	D07儿童骨科、骨盆外科	2021-07-04	2021-07-06	3116185	曾天赐	男	12Y	取除骨折内固定装置		其他	张敬东	易先宏	毛诚晃	尺骨内固定物取出术
1611	D07儿童骨科、骨盆外科	2021-06-29	2021-07-06	3116196	王诗涵	女	9Y	取除骨折内固定装置		其他	张敬东	易先宏	毛诚晃	锁骨内固定物取出术
1612	D07儿童骨科、骨盆外科	2021-07-06	2021-07-08	3116740	杜一言	男	1Y	肱骨髁上骨折		治愈	张敬东	张敬东	毛诚晃	肱骨骨折切开复位钢针内固定术
1613	D07儿童骨科、骨盆外科	2021-07-06	2021-07-08	3116806	雷英聪	男	7Y	肱骨髁上骨折		治愈	张敬东	李玉安	毛诚晃	肱骨骨折闭合复位钢针内固定术
1614	D07儿童骨科、骨盆外科	2021-07-06	2021-07-09	3116951	陈烨淏	男	5Y	取除骨折内固定装置		其他	张敬东	易先宏	毛诚晃	胫骨内固定物取出术
1615	D07儿童骨科、骨盆外科	2021-07-05	2021-07-09	3116955	翁光轩	男	7Y	取除骨折内固定装置		其他	张敬东	李玉安	毛诚晃	股骨内固定物取出术
1616	D07儿童骨科、骨盆外科	2021-07-05	2021-07-09	3117034	杨晨加	男	7Y	肱骨髁上骨折	特指手术后状态	治愈	张敬东	闫广奎	毛诚晃	肱骨骨折闭合复位钢针内固定术
1617	D07儿童骨科、骨盆外科	2021-07-05	2021-07-10	3117184	吴秀文	女	60Y	取除骨折内固定装置	2型糖尿病	其他	孔建中	孔建中	陈墨川	胫骨内固定物取出术
1618	D07儿童骨科、骨盆外科	2021-07-04	2021-07-10	3117247	倪孔钊	男	22Y	锁骨骨折		治愈	孔建中	孔建中	陈墨川	锁骨骨折切开复位钢针内固定术
1619	D07儿童骨科、骨盆外科	2021-07-06	2021-07-10	3117356	张欣晨	女	5Y	鹰嘴骨折		治愈	张敬东	王伟	毛诚晃	尺骨骨折闭合复位钢针内固定术
1620	D07儿童骨科、骨盆外科	2021-07-09	2021-07-10	3117403	梁洛	男	5Y	肱骨髁上骨折		治愈	张敬东	毛诚晃	毛诚晃	肱骨骨折闭合复位钢针内固定术
1621	D07儿童骨科、骨盆外科	2021-07-02	2021-07-10	3117483	程顺娒	男	59Y	双踝骨折	踝关节扭伤;骰骨骨折;踝关节半脱位	治愈	孔建中	孔建中	陈墨川	踝关节骨折切开复位钢针内固定术
1622	D07儿童骨科、骨盆外科	2021-07-01	2021-07-10	3117485	郑亚沅	男	1Y	拇指骨折	开放性手指损伤伴指甲损害	治愈	张敬东	易先宏	王伟	肌腱、血管、神经探查术;皮肤和皮下坏死组织切除清创术;甲床清创术
1623	D07儿童骨科、骨盆外科	2021-07-02	2021-07-10	3117509	黄子涵	女	9Y	肱骨外髁骨折		治愈	张敬东	易先宏	王伟	肱骨骨折切开复位钢针内固定术
1624	D07儿童骨科、骨盆外科	2021-06-26	2021-07-10	3117544	苏立岳	男	69Y	股骨头无菌性坏死	腰和特指椎间盘疾患伴有神经根病;脑软化灶;脱髓鞘性白质脑病;脂肪肝;骨折畸形愈合;手术后恢复期;老年性脑萎缩;腰椎间盘突出;下肢动脉粥样硬化;痛风;脑梗死后遗症;高血压病;原发性单侧髋关节病	治愈	翁益民	翁益民	柯陈荣	全髋关节置换术
1625	D07儿童骨科、骨盆外科	2021-07-04	2021-07-11	3117678	陈细女	女	49Y	踝骨闭合性骨折		治愈	孔建中	孔建中	陈墨川	踝关节骨折切开复位钢针内固定术
1626	D07儿童骨科、骨盆外科	2021-06-27	2021-07-11	3117685	金凤娇	女	80Y	股骨粗隆间骨折	脂肪肝;后天性肾囊肿;结肠积气;下肢动脉粥样硬化;高血压病	治愈	翁益民	翁益民	柯陈荣	股骨骨折闭合复位钢针内固定术
1627	D07儿童骨科、骨盆外科	2021-07-08	2021-07-11	3117751	曾明曦	男	4Y	取除骨折内固定装置		其他	张敬东	易先宏	毛诚晃	胫骨内固定物取出术;瘢痕松解术
1628	D07儿童骨科、骨盆外科	2021-07-07	2021-07-11	3117917	谷越	男	8Y	尺骨桡骨闭合性骨折		治愈	张敬东	易先宏	方明桥	尺骨骨折闭合复位钢针内固定术;桡骨骨折闭合复位钢针内固定术
1629	D07儿童骨科、骨盆外科	2021-07-11	2021-07-11	3117992	王允桃	男	49Y	跟骨骨折		治愈	孔建中	孔建中	陈墨川
1630	D07儿童骨科、骨盆外科	2021-07-08	2021-07-12	3118055	陈俊豪	男	13Y	取除骨折内固定装置		其他	张敬东	易先宏	王伟	桡骨内固定物取出术
1631	D07儿童骨科、骨盆外科	2021-07-06	2021-07-12	3118104	袁纯杰	男	11Y	取除骨折内固定装置		其他	张敬东	易先宏	闫广奎	胫骨内固定物取出术;锁骨内固定物取出术;股骨内固定物取出术
1632	D07儿童骨科、骨盆外科	2021-06-27	2021-07-12	3118332	邵红其	男	46Y	锁骨骨折	2型糖尿病;脂肪肝;下肢动脉粥样硬化;肋骨骨折	治愈	翁益民	翁益民	柯陈荣	锁骨骨折切开复位钢针内固定术
1633	D07儿童骨科、骨盆外科	2021-06-28	2021-07-12	3118346	陈宽度	男	82Y	特指趾骨骨折	内踝骨折;腓骨骨折;多处挫伤;下肢浅表损伤;骨和关节软骨良性肿瘤;下肢动脉粥样硬化;开放性足损伤	治愈	翁益民	翁益民	柯陈荣	踝关节骨折切开复位钢针内固定术;趾骨骨折切开复位钢针内固定术
1634	D07儿童骨科、骨盆外科	2021-06-27	2021-07-12	3118354	季海芬	女	42Y	特指跗骨骨折	弓形足[高弓足];皮下血肿;足特指部位挫伤;楔状骨骨折(足);跖骨骨折;小腿浅表损伤;足部皮肤撕裂伤;大腿挫伤	治愈	翁益民	翁益民	柯陈荣	跗跖关节融合术;跗骨骨折闭合复位钢针内固定术;跖骨骨折闭合复位钢针内固定术
1635	D07儿童骨科、骨盆外科	2021-07-04	2021-07-13	3118445	叶世加	男	61Y	股骨颈骨折	肺结节;后天性肾囊肿	治愈	孔建中	孔建中	陈墨川	全髋关节置换术
1636	D07儿童骨科、骨盆外科	2021-07-12	2021-07-13	3118462	朱德媛	女	82Y	肱骨外科颈骨折	甲状腺机能减退症;冠状动脉粥样硬化;特指手术后状态;肾积水伴肾结石;肾萎缩;高血压病	好转	翁益民	翁益民	柯陈荣
1637	D07儿童骨科、骨盆外科	2021-07-03	2021-07-13	3118531	乔雨娜	女	8Y	跖骨骨折	足部皮肤撕裂伤;足软组织异物残留;特指手术后状态;多处浅表损伤;踝和足水平趾长伸肌和肌腱损伤	治愈	张敬东	易先宏	易先宏	创面负压封闭引流[VSD];跖骨骨折闭合复位钢针内固定术;足肌腱成形术
1638	D07儿童骨科、骨盆外科	2021-07-10	2021-07-13	3118535	崔津铭	男	3Y	鹰嘴骨折		治愈	张敬东	易先宏	方明桥	尺骨骨折闭合复位钢针内固定术
1639	D07儿童骨科、骨盆外科	2021-07-09	2021-07-13	3118672	黄书贺	男	7Y	尺骨桡骨远端骨折		治愈	张敬东	易先宏	方明桥	尺骨骨折闭合复位钢针内固定术
1640	D07儿童骨科、骨盆外科	2021-07-10	2021-07-13	3118697	张舒凯	男	8Y	骨纤维性结构不良(单骨性)	病理性骨折	治愈	张敬东	易先宏	王伟	胫骨病损切除术
1641	D07儿童骨科、骨盆外科	2021-06-27	2021-07-13	3118712	周志国	男	53Y	股骨粗隆下骨折	高血压病;2型糖尿病;脂肪肝;膝内侧半月板损伤;膝关节副韧带扭伤;膝关节十字韧带扭伤;前列腺增生	治愈	翁益民	翁益民	柯陈荣	股骨骨折闭合复位钢针内固定术
1642	D07儿童骨科、骨盆外科	2021-07-08	2021-07-14	3118827	黄宇欣	女	10Y	取除骨折内固定装置		其他	张敬东	易先宏	方明桥	髋关节内固定物取出术
1643	D07儿童骨科、骨盆外科	2021-07-11	2021-07-14	3118836	信紫珊	女	7Y	桡骨颈骨折		治愈	张敬东	易先宏	王伟	桡骨骨折切开复位钢针内固定术
1644	D07儿童骨科、骨盆外科	2021-07-07	2021-07-14	3119116	吴明阳	男	2Y	股骨干骨折	头皮血肿;开放性唇部损伤;头部外伤	治愈	张敬东	易先宏	王伟	股骨骨折闭合复位钢针内固定术
1645	D07儿童骨科、骨盆外科	2021-07-05	2021-07-14	3119145	彭爱荷	女	74Y	肱骨外科颈骨折	高血压Ⅱ期;肺不典型增生	治愈	孔建中	孔建中	陈墨川	肩袖修补术;肱骨植骨术;肱骨骨折切开复位钢针内固定术
1646	D07儿童骨科、骨盆外科	2021-07-10	2021-07-15	3119402	方韩越	男	10Y	跟骨骨折	胸椎骨折;腰椎间盘突出;特指椎间盘疾患	好转	张敬东	易先宏	王伟
1647	D07儿童骨科、骨盆外科	2021-07-13	2021-07-15	3119406	赵梓菡	男	2Y	肱骨髁上骨折		治愈	张敬东	易先宏	王伟	肱骨骨折闭合复位钢针内固定术
1648	D07儿童骨科、骨盆外科	2021-07-10	2021-07-15	3119440	秦建文	男	13Y	股骨颈骨折	桡骨头脱位	治愈	张敬东	易先宏	王伟	股骨骨折闭合复位钢针内固定术
1649	D07儿童骨科、骨盆外科	2021-07-13	2021-07-16	3119582	谢传锐	男	3Y	肱骨髁上骨折	面部肿物	治愈	张敬东	易先宏	王伟	肱骨骨折闭合复位钢针内固定术
1650	D07儿童骨科、骨盆外科	2021-07-13	2021-07-16	3119589	吴昕翔	男	14Y	取除骨折内固定装置		其他	张敬东	易先宏	王伟	尺骨内固定物取出术
1651	D07儿童骨科、骨盆外科	2021-07-12	2021-07-16	3119590	马牧远	女	5Y	鹰嘴骨折		治愈	张敬东	易先宏	方明桥	尺骨骨折闭合复位钢针内固定术
1652	D07儿童骨科、骨盆外科	2021-07-13	2021-07-16	3119591	叶品熠	男	6Y	取除骨折内固定装置		其他	张敬东	易先宏	方明桥	肱骨内固定物取出术
1653	D07儿童骨科、骨盆外科	2021-07-13	2021-07-17	3119700	吴嘉德	男	4Y	肱骨髁上骨折	上肢神经损伤	治愈	张敬东	张敬东	王伟	皮肤和皮下组织非切除性清创;肱骨骨折闭合复位钢针内固定术
1654	D07儿童骨科、骨盆外科	2021-07-13	2021-07-17	3119717	金陈杰	男	13Y	取除骨折内固定装置		其他	张敬东	王伟	李玉安	跟骨内固定物取出术
1655	D07儿童骨科、骨盆外科	2021-07-12	2021-07-17	3119767	董思琦	女	7Y	肱骨外髁骨折		治愈	张敬东	易先宏	王伟	肱骨骨折切开复位钢针内固定术
1656	D07儿童骨科、骨盆外科	2021-07-13	2021-07-17	3119908	李林浩	男	11Y	取除骨折内固定装置		其他	张敬东	闫广奎	李玉安	尺骨内固定物取出术
1657	D07儿童骨科、骨盆外科	2021-07-05	2021-07-17	3119924	黄孔样	男	61Y	跖骨骨折	肺结节;肺气肿;肝血管瘤;肝回声不均;下肢静脉血栓形成	治愈	翁益民	翁益民	柯陈荣	跖骨骨折切开复位钢针内固定术
1658	D07儿童骨科、骨盆外科	2021-07-02	2021-07-17	3120065	傅冬长	男	52Y	跟骨骨折	前列腺囊肿;下肢静脉血栓形成;肾结石;小肾	治愈	孔建中	孔建中	陈墨川	创面负压封闭引流[VSD];跟骨植骨术;关节软骨修复术;跟骨骨折切开复位钢针内固定术
1659	D07儿童骨科、骨盆外科	2021-07-15	2021-07-17	3120067	石江文	男	19Y	肱骨外髁骨折	踝和足浅表损伤;桡骨骨折	好转	孔建中	孔建中	陈墨川
1660	D07儿童骨科、骨盆外科	2021-06-29	2021-07-17	3120070	竺阿玉	女	80Y	股骨下端骨折	高血压病;脂肪肝;下肢动脉粥样硬化;胸椎退行性病变;骨质疏松;后天性肾囊肿	治愈	翁益民	翁益民	柯陈荣	股骨骨折切开复位钢针内固定术
1661	D07儿童骨科、骨盆外科	2021-06-28	2021-07-17	3120075	高铭伟	男	5Y	股骨干骨折	跟骨骨折;跖骨骨折;多处挫伤;头皮血肿;胫骨骨干骨折;腓骨骨折;锁骨骨折;距骨骨折	治愈	张敬东	李玉安	王伟	距骨骨折切开复位钢针内固定术;筋膜间隙切开减压术;股骨骨折闭合复位钢针内固定术;皮肤和皮下坏死组织切除清创术;胫骨骨折闭合复位螺钉内固定术
1662	D07儿童骨科、骨盆外科	2021-07-01	2021-07-17	3120083	姜荣生	男	52Y	肱骨干骨折	尺骨桡骨闭合性骨折;脂肪肝	治愈	孔建中	孔建中	陈墨川	皮肤和皮下坏死组织切除清创术;肱骨骨折切开复位钢针内固定术
1663	D07儿童骨科、骨盆外科	2021-06-25	2021-07-17	3120101	金莲	女	60Y	闭合性胫骨平台骨折	下肢皮肤撕裂伤;胆囊息肉;肝囊肿;特指手术后状态;后天性肾囊肿;下肢动脉粥样硬化	治愈	孔建中	孔建中	陈墨川	胫骨植骨术;胫骨骨折切开复位钢针内固定术
1664	D07儿童骨科、骨盆外科	2021-07-06	2021-07-17	3120104	张建儿	女	39Y	多发性骨盆骨折	头皮血肿;创伤性胸腔积液	治愈	孔建中	孔建中	陈墨川	骨盆骨折切开复位钢针内固定术
1665	D07儿童骨科、骨盆外科	2021-07-12	2021-07-18	3120269	金昌喜	男	89Y	锁骨骨折	肩胛骨骨折;腰椎骨折;特指趾骨骨折;多发性肋骨骨折;下肢动脉粥样硬化;液气胸;高血压病;脑梗死;肺水肿;特指手术后状态;老年性脑萎缩;脱髓鞘性白质脑病;头皮血肿;创伤性皮下气肿;混合型颈椎病;颈椎间盘疾患;颈椎间盘突出;胸椎骨折	未愈	翁益民	翁益民	柯陈荣
1666	D07儿童骨科、骨盆外科	2021-07-12	2021-07-18	3120283	金杨凯	男	13Y	胫骨骨折		治愈	张敬东	李玉安	王伟	胫骨骨折切开复位钢针内固定术
1667	D07儿童骨科、骨盆外科	2021-06-28	2021-07-18	3120449	黄兰卿	女	77Y	股骨颈骨折	后天性肾囊肿;肝囊肿	治愈	翁益民	翁益民	柯陈荣	全髋关节表面置换术
1668	D07儿童骨科、骨盆外科	2021-07-16	2021-07-18	3120471	张轩	男	4Y	取除骨折内固定装置		其他	张敬东	易先宏	王伟	胫骨内固定物取出术
1669	D07儿童骨科、骨盆外科	2021-07-05	2021-07-18	3120494	胡加静	男	49Y	股骨粗隆间骨折	脂肪肝;多发性肋骨骨折;痛风	治愈	孔建中	孔建中	陈墨川	股骨植骨术;股骨骨折闭合复位钢针内固定术
1670	D07儿童骨科、骨盆外科	2021-07-07	2021-07-18	3120518	周青云	男	54Y	锁骨骨折	高血压病;脂肪肝;前列腺结石;肝囊肿	治愈	孔建中	孔建中	陈墨川	锁骨植骨术;锁骨骨折切开复位钢针内固定术
1671	D07儿童骨科、骨盆外科	2021-07-15	2021-07-19	3120619	黄子涵	男	13Y	取除骨折内固定装置		其他	张敬东	易先宏	王伟	胫骨内固定物取出术
1672	D07儿童骨科、骨盆外科	2021-07-14	2021-07-19	3120622	何茂林	男	14Y	取除骨折内固定装置		其他	张敬东	方明桥	王伟	尺骨内固定物取出术
1673	D07儿童骨科、骨盆外科	2021-07-15	2021-07-19	3120673	周一诺	男	4Y	取除骨折内固定装置		其他	张敬东	易先宏	王伟	胫骨内固定物取出术
1674	D07儿童骨科、骨盆外科	2021-07-15	2021-07-19	3120739	郑理丰	男	10Y	取除骨折内固定装置		其他	张敬东	易先宏	王伟	胫骨内固定物取出术
1675	D07儿童骨科、骨盆外科	2021-07-10	2021-07-19	3120827	徐荷芬	女	65Y	桡骨下端骨折	肝囊肿;下肢动脉粥样硬化;特指手术后状态;踝和足水平趾长伸肌和肌腱损伤;桡骨下端骨折;多处挫伤;2型糖尿病;脂肪肝	治愈	翁益民	翁益民	柯陈荣	足肌腱成形术;桡骨骨折闭合复位钢针内固定术;创面负压封闭引流[VSD];皮肤和皮下坏死组织切除清创术
1676	D07儿童骨科、骨盆外科	2021-07-13	2021-07-19	3120858	木芙蓉	女	58Y	股骨颈骨折	腕骨病变	治愈	孔建中	孔建中	陈墨川	股骨骨折闭合复位钢针内固定术
1677	D07儿童骨科、骨盆外科	2021-07-11	2021-07-19	3120863	陈金林	男	64Y	三踝骨折	脂肪肝;下肢动脉粥样硬化;踝关节脱位	治愈	孔建中	孔建中	陈墨川	水泥间隔物置入术;关节软骨修复术;踝关节骨折切开复位钢针内固定术
1678	D07儿童骨科、骨盆外科	2021-07-15	2021-07-20	3121118	吴宥儒	女	9Y	肱骨髁上骨折		治愈	张敬东	王伟	李玉安	肱骨骨折闭合复位术
1679	D07儿童骨科、骨盆外科	2021-07-16	2021-07-20	3121137	陈锦润	男	9Y	取除骨折内固定装置		其他	张敬东	易先宏	李玉安	胫骨内固定物取出术;腓骨内固定物取出术
1680	D07儿童骨科、骨盆外科	2021-07-18	2021-07-20	3121140	白文静	女	1Y	肱骨髁上骨折		治愈	张敬东	易先宏	王伟	肱骨骨折闭合复位术
1681	D07儿童骨科、骨盆外科	2021-07-18	2021-07-20	3121149	张景怡	女	10Y	取除骨折内固定装置		其他	张敬东	李玉安	王伟	桡骨内固定物取出术
1682	D07儿童骨科、骨盆外科	2021-07-18	2021-07-20	3121243	李荣轩	男	3Y	取除骨折内固定装置		其他	张敬东	易先宏	王伟	胫骨内固定物取出术
1683	D07儿童骨科、骨盆外科	2021-07-18	2021-07-21	3121414	刘辰安	男	8Y	取除骨折内固定装置		其他	张敬东	易先宏	李玉安	胫骨内固定物取出术;腓骨内固定物取出术
1684	D07儿童骨科、骨盆外科	2021-07-18	2021-07-21	3121426	柴子晨	男	5Y	取除骨折内固定装置		其他	张敬东	闫广奎	王伟	股骨内固定物取出术
1685	D07儿童骨科、骨盆外科	2021-07-16	2021-07-21	3121436	吴卓见	男	11Y	取除骨折内固定装置		其他	张敬东	易先宏	方明桥	瘢痕松解术;肱骨内固定物取出术
1686	D07儿童骨科、骨盆外科	2021-07-17	2021-07-21	3121619	王好友	男	39Y	锁骨骨折	小腿浅表损伤;前列腺结石	治愈	孔建中	陈墨川	陈墨川	锁骨骨折切开复位钢针内固定术
1687	D07儿童骨科、骨盆外科	2021-07-15	2021-07-21	3121622	刘细香	女	56Y	髌骨骨折	后天性肾囊肿;肺钙化	治愈	孔建中	孔建中	陈墨川	股四头肌成形术;关节软骨修复术;髌骨骨折切开复位螺钉内固定术
1688	D07儿童骨科、骨盆外科	2021-07-11	2021-07-21	3121625	王永桃	男	49Y	跟骨骨折	脂肪肝;胆囊结石	治愈	孔建中	孔建中	陈墨川	跟骨植骨术;关节软骨修复术;跟骨骨折切开复位钢针内固定术
1689	D07儿童骨科、骨盆外科	2021-07-07	2021-07-21	3121629	徐金凡	男	34Y	尺骨骨折	颧骨骨折;脂肪肝;多处挫伤	治愈	翁益民	翁益民	柯陈荣	尺骨骨折切开复位钢针内固定术
1690	D07儿童骨科、骨盆外科	2021-07-14	2021-07-21	3121683	王秋华	女	70Y	股骨粗隆间骨折	脑梗死后遗症;高血压病;下肢动脉粥样硬化;下肢静脉血栓形成;股骨颈骨折	治愈	孔建中	孔建中	陈墨川	下腔静脉滤器置入术;股静脉穿刺术;下肢静脉造影;股骨骨折闭合复位钢针内固定术
1691	D07儿童骨科、骨盆外科	2021-07-20	2021-07-22	3121883	吕杨村	男	9Y	蒙特贾骨折脱位		治愈	张敬东	易先宏	方明桥	桡尺关节脱位闭合复位术;尺骨骨折闭合复位术
1692	D07儿童骨科、骨盆外科	2021-07-14	2021-07-22	3121900	冯业腾	男	4Y	胫骨上端骨折		好转	张敬东	易先宏	王伟
1693	D07儿童骨科、骨盆外科	2021-07-17	2021-07-22	3122019	黄波	男	8Y	取除骨折内固定装置		其他	张敬东	易先宏	方明桥	胫骨内固定物取出术;腓骨内固定物取出术
1694	D07儿童骨科、骨盆外科	2021-07-19	2021-07-23	3122159	刘玉玲	女	10Y	取除骨折内固定装置	特指肾盂积水	其他	张敬东	易先宏	方明桥	桡骨内固定物取出术
1695	D07儿童骨科、骨盆外科	2021-07-21	2021-07-24	3122301	王莉灵	女	3Y	肱骨髁上骨折		好转	张敬东	易先宏	李玉安	肱骨骨折闭合复位术
1696	D07儿童骨科、骨盆外科	2021-07-22	2021-07-24	3122353	郑玉婷	女	6Y	肱骨髁上骨折		治愈	张敬东	易先宏	王伟	肱骨骨折切开复位术
1697	D07儿童骨科、骨盆外科	2021-07-20	2021-07-24	3122360	上官福涛	男	10Y	肱骨外髁骨折		治愈	张敬东	易先宏	王伟	肱骨骨折切开复位术
1698	D07儿童骨科、骨盆外科	2021-07-03	2021-07-24	3122581	洪新胜	男	54Y	胫骨骨折	肾结石;内踝骨折;脂肪肝	治愈	孔建中	孔建中	陈墨川	创面负压封闭引流[VSD];胫神经探查术;下肢动脉探查术;下肢肌腱缝合术;胫骨骨折切开复位钢针内固定术;皮肤和皮下坏死组织切除清创术
1699	D07儿童骨科、骨盆外科	2021-07-17	2021-07-24	3122616	杨永贵	男	61Y	外踝骨折	肌腱和肌肉损伤;冠状动脉粥样硬化性心脏病;下肢静脉血栓形成	好转	孔建中	孔建中	陈墨川
1700	D07儿童骨科、骨盆外科	2021-07-17	2021-07-25	3122758	金建存	男	54Y	跖骨骨折	胸腔积液;脂肪肝;前列腺结石;面部挫伤	治愈	孔建中	孔建中	陈墨川	跗跖关节融合术;跖骨骨折切开复位术;跖关节脱位闭合复位术
1701	D07儿童骨科、骨盆外科	2021-07-23	2021-07-25	3122770	袁驹辉	男	1Y	肱骨髁上骨折		治愈	张敬东	易先宏	王伟	肱骨骨折闭合复位术
1702	D07儿童骨科、骨盆外科	2021-07-19	2021-07-25	3122773	王梓宣	女	8Y	取除骨折内固定装置		其他	张敬东	易先宏	李玉安	肱骨内固定物取出术
1703	D07儿童骨科、骨盆外科	2021-07-23	2021-07-25	3122775	徐络希	女	3Y	肱骨髁上骨折		治愈	张敬东	易先宏	李玉安	肱骨骨折切开复位术
1704	D07儿童骨科、骨盆外科	2021-07-14	2021-07-25	3122804	钱鸿	男	26Y	髋臼骨折	腰椎骨折;肌腱和肌肉损伤;脂肪肝	治愈	孔建中	孔建中	陈墨川	髋骨植骨术;关节软骨修复术;骨盆钢板内固定术
1705	D07儿童骨科、骨盆外科	2021-07-05	2021-07-25	3122809	王继奎	男	51Y	锁骨骨折	肩胛骨骨折;掌骨骨折;多发性肋骨骨折;胸腔积液;臂丛神经损伤;肺水肿	治愈	翁益民	翁益民	柯陈荣	锁骨骨折切开复位术;肩胛骨骨折切开复位钢板内固定术
1706	D07儿童骨科、骨盆外科	2021-07-21	2021-07-25	3123029	王灵贺	女	4Y	尺骨桡骨远端骨折		治愈	张敬东	易先宏	王伟	桡骨骨折闭合复位术
1707	D07儿童骨科、骨盆外科	2021-07-20	2021-07-26	3123210	郑瑞存	男	3Y	肱骨下端骨折		治愈	张敬东	易先宏	方明桥	肱骨骨折闭合复位术
1708	D07儿童骨科、骨盆外科	2021-07-20	2021-07-26	3123222	周琳凯	男	5Y	股骨干骨折	特指手术后状态	治愈	张敬东	易先宏	方明桥	股骨骨折闭合复位髓内针内固定术
1709	D07儿童骨科、骨盆外科	2021-07-19	2021-07-26	3123236	夏钰莹	女	6Y	特指指骨骨折	开放性手多发损伤	治愈	张敬东	易先宏	王伟	指神经缝合术;手部肌腱成形术;皮肤和皮下坏死组织切除清创术;指骨骨折切开复位钢针内固定术
1710	D07儿童骨科、骨盆外科	2021-07-17	2021-07-26	3123331	陈荷花	女	83Y	股骨骨折	高血压病;肺部感染;胸腔积液;支气管炎	治愈	孔建中	孔建中	陈墨川	股骨骨折切开复位术
1711	D07儿童骨科、骨盆外科	2021-07-26	2021-07-27	3123557	杜明睿	男	4M	肱骨骨折		治愈	张敬东	易先宏	方明桥
1712	D07儿童骨科、骨盆外科	2021-07-25	2021-07-27	3123563	徐政	男	11Y	桡骨下端骨折	尺骨骨折	治愈	张敬东	李玉安	王伟	尺骨骨折闭合复位术;桡骨骨折闭合复位术
1713	D07儿童骨科、骨盆外科	2021-07-24	2021-07-27	3123564	石庆淑	女	11Y	取除骨折内固定装置		其他	张敬东	易先宏	王伟	股骨内固定物取出术
1714	D07儿童骨科、骨盆外科	2021-07-22	2021-07-28	3123882	冉欣琳	女	7Y	取除骨折内固定装置		其他	张敬东	易先宏	方明桥	股骨内固定物取出术
1715	D07儿童骨科、骨盆外科	2021-07-25	2021-07-28	3124023	郑钧	男	13Y	取除骨折内固定装置		其他	张敬东	易先宏	王伟	尺骨内固定物取出术;桡骨内固定物取出术
1716	D07儿童骨科、骨盆外科	2021-07-23	2021-07-28	3124039	陈浩	男	13Y	取除骨折内固定装置		其他	张敬东	易先宏	方明桥	桡骨内固定物取出术;尺骨内固定物取出术
1717	D07儿童骨科、骨盆外科	2021-07-18	2021-07-28	3124138	黄吴春	女	73Y	股骨颈骨折	胆囊结石;脂肪肝	治愈	孔建中	孔建中	陈墨川	全髋关节置换术
1718	D07儿童骨科、骨盆外科	2021-07-18	2021-07-28	3124141	应金媛	女	87Y	股骨颈骨折	肝囊肿	治愈	孔建中	孔建中	陈墨川	人工股骨头置换术
1719	D07儿童骨科、骨盆外科	2021-07-22	2021-07-28	3124143	李修彬	男	15Y	取除骨折内固定装置	单一性骨囊肿	其他	张敬东	易先宏	李玉安	肱骨内固定物取出术
1720	D07儿童骨科、骨盆外科	2021-07-27	2021-07-29	3124449	李佳怡	女	3Y	肱骨髁上骨折		治愈	张敬东	易先宏	方明桥	肱骨骨折闭合复位术
1721	D07儿童骨科、骨盆外科	2021-07-24	2021-07-29	3124514	王梓恒	男	3Y	肱骨外髁骨折		治愈	张敬东	易先宏	王伟	肱骨骨折切开复位术
1722	D07儿童骨科、骨盆外科	2021-07-17	2021-07-29	3124550	潘禄芳	女	29Y	肱骨外科颈骨折	脂肪肝;后天性肾囊肿	治愈	翁益民	翁益民	柯陈荣	肱骨骨折切开复位钢针内固定术
1723	D07儿童骨科、骨盆外科	2021-07-18	2021-07-29	3124565	谢庆象	男	81Y	髌骨骨折	前列腺结石;前列腺增生;二尖瓣关闭不全;二尖瓣后叶脱垂;下肢动脉粥样硬化	治愈	翁益民	翁益民	柯陈荣	髌骨骨折切开复位螺钉内固定术
1724	D07儿童骨科、骨盆外科	2021-07-18	2021-07-30	3124684	张凯博	男	17Y	胫腓骨干骨折	肌腱和肌肉损伤	治愈	孔建中	孔建中	陈墨川	胫骨骨折切开复位钢板内固定术
1725	D07儿童骨科、骨盆外科	2021-07-04	2021-07-30	3124713	梁细平	男	48Y	鹰嘴骨折	多发性肋骨骨折;胸椎骨折;腰椎骨折;肺挫伤;脂肪肝;单纯性肾囊肿;骨盆骨折	治愈	孔建中	孔建中	陈墨川	尺骨骨折闭合复位钢针内固定术;后入路腰椎融合术;骨盆骨折切开复位钢板内固定术
1726	D07儿童骨科、骨盆外科	2021-07-26	2021-07-31	3124864	马成博	男	8Y	取除骨折内固定装置		其他	张敬东	李玉安	王伟	桡骨内固定物取出术
1727	D07儿童骨科、骨盆外科	2021-07-26	2021-07-31	3124879	黄黎昕	男	9Y	取除骨折内固定装置		其他	张敬东	李玉安	王伟	腓骨内固定物取出术
1728	D07儿童骨科、骨盆外科	2021-07-27	2021-07-31	3124885	郑昊	男	8Y	肱骨髁上骨折	桡神经损害	治愈	张敬东	李玉安	王伟	肱骨骨折闭合复位术
1729	D07儿童骨科、骨盆外科	2021-07-12	2021-07-31	3124904	叶诚成	男	10Y	跟骨骨折	腓骨骨折;足舟状骨骨折	治愈	张敬东	李玉安	王伟	跟骨骨折切开复位术
1730	D07儿童骨科、骨盆外科	2021-07-24	2021-07-31	3124941	秦诗佳	女	2Y	肱骨外髁骨折		治愈	张敬东	李玉安	王伟	肱骨骨折切开复位术
1731	D07儿童骨科、骨盆外科	2021-07-28	2021-07-31	3125128	钟熙玥	女	2Y	距骨骨折		治愈	张敬东	李玉安	王伟
1732	D07儿童骨科、骨盆外科	2021-07-27	2021-08-01	3125314	胡航瑞	男	9Y	取除骨折内固定装置		其他	张敬东	易先宏	方明桥	胫骨内固定物取出术
1733	D07儿童骨科、骨盆外科	2021-07-29	2021-08-01	3125319	陈郁衡	男	6Y	肱骨髁上骨折	前臂神经损伤	治愈	张敬东	李玉安	王伟	肱骨骨折闭合复位钢针内固定术
1734	D07儿童骨科、骨盆外科	2021-07-26	2021-08-01	3125357	孟子成	男	3Y	胫腓骨下端骨折		治愈	张敬东	易先宏	李玉安
1735	D07儿童骨科、骨盆外科	2021-07-15	2021-08-01	3125401	唐凤平	男	51Y	跖骨骨折	下肢动脉粥样硬化;拇趾骨折;跖骨脱位;外踝骨折;开放性足损伤	治愈	孔建中	孔建中	陈墨川	跖骨骨折切开复位钢针内固定术;跗跖关节融合术;跗跖关节脱位切开复位术;踝关节骨折切开复位钢针内固定术
1736	D07儿童骨科、骨盆外科	2021-07-21	2021-08-02	3125645	项晗曦	女	5Y	下肢皮肤撕裂伤	颞骨骨折	治愈	张敬东	李玉安	王伟	创面负压封闭引流[VSD];皮肤和皮下坏死组织切除清创术
1737	D07儿童骨科、骨盆外科	2021-07-28	2021-08-02	3125670	孙术涵	男	10Y	取除骨折内固定装置		其他	张敬东	易先宏	方明桥	锁骨内固定物取出术
1738	D07儿童骨科、骨盆外科	2021-07-08	2021-08-02	3125685	顾少华	男	48Y	肱骨上端骨折	乙型病毒性肝炎;脂肪肝;单纯性肾囊肿;膀胱结石;2型糖尿病;臂丛神经损伤;前臂桡神经损伤;脑缺血灶;前列腺结石	治愈	翁益民	翁益民	柯陈荣	肌腱、血管、神经探查术;肱骨骨折切开复位钢针内固定术
1739	D07儿童骨科、骨盆外科	2021-07-31	2021-08-02	3125730	彭灵	女	10Y	肱骨髁上骨折	前臂神经损伤	治愈	张敬东	李玉安	王伟	肱骨骨折闭合复位钢针内固定术
1740	D07儿童骨科、骨盆外科	2021-06-20	2021-08-02	3125855	戴小忠	男	53Y	跖骨骨折	楔状骨骨折(足);开放性足损伤;肾结石	治愈	孔建中	孔建中	陈墨川	创面负压封闭引流[VSD];皮瓣修整术
1741	D07儿童骨科、骨盆外科	2021-07-28	2021-08-02	3125920	王浩丞	男	2Y	股骨骨折	成骨不全	治愈	张敬东	易先宏	方明桥	石膏绷带固定;股骨骨折闭合复位术
1742	D07儿童骨科、骨盆外科	2021-08-01	2021-08-03	3126013	南宇辰	男	1Y	肱骨髁上骨折		治愈	张敬东	易先宏	方明桥	肱骨骨折闭合复位钢针内固定术
1743	D07儿童骨科、骨盆外科	2021-08-02	2021-08-03	3126049	王资淳	男	3Y	肱骨髁上骨折		治愈	张敬东	易先宏	王伟	肱骨骨折闭合复位钢针内固定术
1744	D07儿童骨科、骨盆外科	2021-07-28	2021-08-03	3126302	林芷璇	女	10Y	肱骨下端骨折		治愈	孔建中	孔建中	陈墨川	肱骨外固定架固定术
1745	D07儿童骨科、骨盆外科	2021-07-24	2021-08-04	3126424	叶启赫	男	8Y	胫腓骨干骨折	特指手术后状态;多处浅表损伤	治愈	张敬东	李玉安	王伟	胫骨骨折闭合复位螺钉内固定术;胫骨外固定架固定术
1746	D07儿童骨科、骨盆外科	2021-08-01	2021-08-04	3126428	卢治全	男	5Y	肱骨髁上骨折		治愈	张敬东	李玉安	王伟	肱骨骨折闭合复位钢针内固定术
1747	D07儿童骨科、骨盆外科	2021-08-01	2021-08-04	3126507	巩正宁	男	10Y	肱骨髁上骨折	急性支气管炎;前臂桡神经损伤	治愈	张敬东	易先宏	方明桥	肱骨骨折闭合复位钢针内固定术
1748	D07儿童骨科、骨盆外科	2021-07-20	2021-08-04	3126634	杨焱淼	男	43Y	跟骨骨折	特指手术后状态;脂肪肝;前列腺结石	治愈	孔建中	孔建中	陈墨川	跟骨植骨术;关节软骨修复术;跟骨骨折切开复位钢板内固定术
1749	D07儿童骨科、骨盆外科	2021-07-25	2021-08-04	3126720	王大乐	男	41Y	胫骨下端骨折	特指手术后状态;脂肪肝;腕骨骨折;内踝骨折;多处挫伤;腕和手水平特指神经损伤;口腔开放性伤口	治愈	翁益民	翁益民	柯陈荣	胫骨骨折切开复位钢针内固定术
1750	D07儿童骨科、骨盆外科	2021-07-31	2021-08-05	3126802	陈宇翔	男	7Y	肱骨外髁骨折		治愈	张敬东	李玉安	王伟	肱骨骨折切开复位钢针内固定术
1751	D07儿童骨科、骨盆外科	2021-07-30	2021-08-05	3126804	卢奕涵	女	6Y	胫腓骨干骨折		治愈	张敬东	李玉安	王伟	胫骨骨折闭合复位螺钉内固定术
1752	D07儿童骨科、骨盆外科	2021-08-01	2021-08-05	3126814	李心宇	男	7Y	胫腓骨干骨折		治愈	张敬东	李玉安	王伟	胫骨骨折闭合复位螺钉内固定术
1753	D07儿童骨科、骨盆外科	2021-07-31	2021-08-05	3126816	杨瑞	男	3Y	肱骨外髁骨折		治愈	张敬东	李玉安	王伟	肱骨骨折切开复位钢针内固定术
1754	D07儿童骨科、骨盆外科	2021-07-28	2021-08-05	3126817	夏皓轩	男	2Y	胫腓骨干骨折	小腿开放性损伤;多发性损伤	治愈	张敬东	易先宏	方明桥	石膏绷带固定;胫骨骨折切开复位钢针内固定术
1755	D07儿童骨科、骨盆外科	2021-07-31	2021-08-05	3127050	张浩然	男	15Y	取除骨折内固定装置	脂肪肝	其他	孔建中	孔建中	陈墨川	踝关节内固定物取出术
1756	D07儿童骨科、骨盆外科	2021-08-03	2021-08-06	3127107	廖浩博	男	9Y	取除骨折内固定装置		其他	张敬东	闫广奎	王伟	锁骨内固定物取出术
1757	D07儿童骨科、骨盆外科	2021-07-28	2021-08-06	3127110	陈惜月	女	2Y	开放性跖骨骨折	踝和足水平趾长伸肌和肌腱损伤;开放性足损伤	治愈	张敬东	李玉安	王伟	创面负压封闭引流[VSD];足肌腱成形术;跖骨骨折闭合复位术
1758	D07儿童骨科、骨盆外科	2021-08-02	2021-08-06	3127127	方学雷	男	14Y	取除骨折内固定装置		其他	张敬东	易先宏	方明桥	尺骨内固定物取出术
1759	D07儿童骨科、骨盆外科	2021-08-04	2021-08-07	3127269	黄以勒	男	3Y	肱骨髁上骨折		治愈	张敬东	李玉安	王伟	肱骨骨折闭合复位钢针内固定术
1760	D07儿童骨科、骨盆外科	2021-08-02	2021-08-07	3127272	张威	男	13Y	取除骨折内固定装置		其他	张敬东	李玉安	王伟	锁骨内固定物取出术
1761	D07儿童骨科、骨盆外科	2021-07-29	2021-08-07	3127276	林渝钧	女	12Y	尺骨桡骨闭合性骨折	特指手术后状态	治愈	张敬东	李玉安	王伟	尺骨骨折切开复位髓内针内固定术;桡骨骨折切开复位髓内针内固定术
1762	D07儿童骨科、骨盆外科	2021-08-05	2021-08-07	3127278	戚旗	女	5Y	肱骨髁上骨折		治愈	张敬东	闫广奎	王伟	肱骨骨折闭合复位钢针内固定术
1763	D07儿童骨科、骨盆外科	2021-07-26	2021-08-07	3127428	邵彩莲	女	74Y	股骨颈骨折	大手术个人史	治愈	孔建中	孔建中	陈墨川	全髋关节表面置换术
1764	D07儿童骨科、骨盆外科	2021-07-15	2021-08-07	3127434	王松华	女	59Y	跟骨骨折	肾错构瘤	治愈	孔建中	孔建中	陈墨川	跟骨骨折切开复位钢针内固定术;跟骨植骨术
1765	D07儿童骨科、骨盆外科	2021-08-04	2021-08-07	3127444	王心源	男	5Y	肱骨外髁骨折		治愈	张敬东	闫广奎	王伟	肱骨骨折切开复位钢针内固定术
1766	D07儿童骨科、骨盆外科	2021-07-24	2021-08-07	3127451	陈银伟	男	22Y	股骨粗隆间骨折		治愈	孔建中	孔建中	陈墨川	股骨骨折闭合复位钢针内固定术
1767	D07儿童骨科、骨盆外科	2021-07-24	2021-08-07	3127553	胡洪光	男	71Y	股骨髁骨折	桶状胸;特指手术随诊医疗;骨质疏松;高血压病;下肢损伤;肾结石;肝囊肿;下肢动脉粥样硬化	治愈	翁益民	翁益民	柯陈荣	股骨骨折切开复位钢针内固定术
1768	D07儿童骨科、骨盆外科	2021-07-29	2021-08-07	3127559	郑茹慧	女	16Y	胫腓骨干骨折	膝挫伤;特指手术随诊医疗	治愈	翁益民	翁益民	柯陈荣	腓骨骨折闭合复位钢针内固定术;胫骨骨折切开复位钢针内固定术
1769	D07儿童骨科、骨盆外科	2021-07-19	2021-08-07	3127566	王庆康	男	60Y	股骨干骨折	胆囊结石;单纯性肾囊肿;下肢动脉粥样硬化;肝硬化;慢性乙型病毒性肝炎;髌骨骨折;尺神经损害;小腿浅表损伤	治愈	翁益民	翁益民	柯陈荣	股骨骨折切开复位钢针内固定术
1770	D07儿童骨科、骨盆外科	2021-07-25	2021-08-07	3127567	徐梓昊	男	10Y	股骨干骨折	多发性损伤	治愈	张敬东	易先宏	方明桥	股骨骨折切开复位钢针内固定术
1771	D07儿童骨科、骨盆外科	2021-08-02	2021-08-08	3127893	陈苏	男	13Y	取除骨折内固定装置		其他	张敬东	易先宏	王伟	胫骨内固定物取出术
1772	D07儿童骨科、骨盆外科	2021-08-05	2021-08-08	3127974	董宇昊	男	7Y	桡骨下端骨折		治愈	张敬东	易先宏	王伟	桡骨骨折闭合复位钢针内固定术
1773	D07儿童骨科、骨盆外科	2021-08-07	2021-08-08	3127986	叶德瑜	男	7Y	肱骨髁上骨折		治愈	张敬东	毛诚晃	王伟	肱骨骨折闭合复位钢针内固定术
1774	D07儿童骨科、骨盆外科	2021-08-05	2021-08-09	3128190	刘天宇	男	9Y	取除骨折内固定装置		其他	张敬东	易先宏	方明桥	膝关节镜检查;胫骨内固定物取出术
1775	D07儿童骨科、骨盆外科	2021-08-05	2021-08-09	3128191	谢子涵	女	5Y	肱骨外髁骨折		治愈	张敬东	易先宏	方明桥	肱骨骨折切开复位钢针内固定术
1776	D07儿童骨科、骨盆外科	2021-08-05	2021-08-09	3128193	翁洁	男	9Y	胫腓骨闭合性骨折	胫骨下端骨折	治愈	张敬东	易先宏	方明桥	胫骨骨骺分离闭合复位术;胫骨骨折闭合复位螺钉内固定术
1777	D07儿童骨科、骨盆外科	2021-08-04	2021-08-09	3128203	胡杰	男	10Y	桡骨下端骨折		治愈	张敬东	闫广奎	王伟	桡骨骨折闭合复位钢针内固定术
1778	D07儿童骨科、骨盆外科	2021-08-05	2021-08-09	3128206	潘贤杰	男	11Y	取除骨折内固定装置		其他	张敬东	李玉安	王伟	胫骨内固定物取出术
1779	D07儿童骨科、骨盆外科	2021-08-02	2021-08-09	3128215	张锦鹏	男	11Y	肱骨髁上骨折	肌腱和肌肉损伤	治愈	孔建中	孔建中	陈墨川	肱骨骨折闭合复位钢针内固定术
1780	D07儿童骨科、骨盆外科	2021-08-04	2021-08-10	3128544	陈政源	男	12Y	尺骨桡骨远端骨折		治愈	张敬东	闫广奎	王伟	尺骨骨折闭合复位髓内针内固定术;桡骨骨折切开复位钢板内固定术
1781	D07儿童骨科、骨盆外科	2021-07-29	2021-08-10	3128560	潘秋影	女	52Y	踝骨闭合性骨折	高血压病	治愈	孔建中	孔建中	陈墨川	踝关节骨折切开复位钢针内固定术
1782	D07儿童骨科、骨盆外科	2021-07-25	2021-08-10	3128565	郑昌满	男	50Y	胫腓骨干骨折	踝关节脱位	治愈	孔建中	孔建中	陈墨川	胫骨骨折切开复位钢板内固定术;腓骨骨折切开复位钢板内固定术
1783	D07儿童骨科、骨盆外科	2021-08-09	2021-08-10	3128566	林杭	男	13Y	取除骨折内固定装置		其他	张敬东	易先宏	方明桥	尺骨内固定物取出术
1784	D07儿童骨科、骨盆外科	2021-07-28	2021-08-10	3128629	金子淇	女	6Y	股骨干骨折	下肢皮肤撕裂伤	治愈	张敬东	易先宏	方明桥	股骨骨折闭合复位钢针内固定术
1785	D07儿童骨科、骨盆外科	2021-08-09	2021-08-11	3128940	刘晨曦	男	5Y	肱骨下端骨折		治愈	张敬东	易先宏	王伟	肱骨骨折闭合复位钢针内固定术
1786	D07儿童骨科、骨盆外科	2021-08-09	2021-08-11	3128947	李天意	男	12Y	取除骨折内固定装置		其他	张敬东	易先宏	李玉安	髌骨内固定物取出术
1787	D07儿童骨科、骨盆外科	2021-08-10	2021-08-12	3129422	陆俊泽	男	2Y	肱骨髁上骨折		好转	张敬东	李玉安	毛诚晃	肱骨骨折闭合复位钢针内固定术
1788	D07儿童骨科、骨盆外科	2021-08-09	2021-08-12	3129500	阮晖	男	13Y	桡骨颈骨折		治愈	张敬东	易先宏	方明桥	桡骨骨折切开复位钢针内固定术
1789	D07儿童骨科、骨盆外科	2021-08-10	2021-08-12	3129540	李明周	男	13Y	取除骨折内固定装置		其他	张敬东	李玉安	闫广奎	尺骨内固定物取出术
1790	D07儿童骨科、骨盆外科	2021-08-03	2021-08-12	3129544	谢美素	女	65Y	髌骨骨折	高血压病;脂肪肝;胆囊息肉	治愈	孔建中	孔建中	陈墨川	关节软骨修复术;股四头肌成形术;髌骨骨折切开复位螺钉内固定术
1791	D07儿童骨科、骨盆外科	2021-08-07	2021-08-12	3129547	汤丰豪	男	14Y	胫骨下端骨折		治愈	孔建中	孔建中	陈墨川	胫骨骨折闭合复位螺钉内固定术
1792	D07儿童骨科、骨盆外科	2021-08-09	2021-08-13	3129689	邱欣蕊	女	7Y	取除骨折内固定装置		其他	张敬东	易先宏	王伟	胫骨内固定物取出术
1793	D07儿童骨科、骨盆外科	2021-08-12	2021-08-13	3129742	苟国浩	男	4Y	肱骨髁上骨折	上臂神经损伤	治愈	张敬东	易先宏	方明桥	皮肤和皮下坏死组织切除清创术;肱骨骨折闭合复位钢针内固定术
1794	D07儿童骨科、骨盆外科	2021-08-12	2021-08-13	3129795	李欣悦	女	5Y	肱骨髁上骨折		好转	张敬东	李玉安	毛诚晃	肱骨骨折闭合复位钢针内固定术
1795	D07儿童骨科、骨盆外科	2021-08-10	2021-08-14	3129978	鲁云达	男	16Y	取除骨折内固定装置		其他	张敬东	易先宏	王伟	胫骨内固定物取出术
1796	D07儿童骨科、骨盆外科	2021-08-07	2021-08-14	3129983	李凤	女	13Y	骨折畸形愈合		治愈	张敬东	易先宏	方明桥	尺骨内固定物取出术;石膏绷带固定
1797	D07儿童骨科、骨盆外科	2021-08-07	2021-08-14	3129989	陈雅妮	女	6Y	胫骨骨折		治愈	张敬东	易先宏	王伟	胫骨骨折闭合复位螺钉内固定术
1798	D07儿童骨科、骨盆外科	2021-08-10	2021-08-14	3130009	陈杜斌	男	10Y	取除骨折内固定装置		其他	张敬东	易先宏	王伟	肱骨内固定物取出术
1799	D07儿童骨科、骨盆外科	2021-08-08	2021-08-15	3130455	金泫诚	男	7Y	腰椎骨折	跟骨骨折;骶骨骨折	好转	张敬东	易先宏	闫广奎
1800	D07儿童骨科、骨盆外科	2021-08-13	2021-08-15	3130461	吴沛静	女	6Y	肱骨髁上骨折		治愈	张敬东	易先宏	毛诚晃	肱骨骨折闭合复位钢针内固定术
1801	D07儿童骨科、骨盆外科	2021-08-12	2021-08-15	3130466	周博文	男	9Y	取除骨折内固定装置		其他	张敬东	易先宏	方明桥	瘢痕松解术;肱骨内固定物取出术
1802	D07儿童骨科、骨盆外科	2021-08-02	2021-08-15	3130471	任艺柯	女	4Y	肱骨髁上骨折		治愈	张敬东	易先宏	方明桥	肱骨骨折切开复位钢针内固定术
1803	D07儿童骨科、骨盆外科	2021-08-13	2021-08-15	3130478	黄晓	男	12Y	取除骨折内固定装置		其他	张敬东	易先宏	王伟	尺骨内固定物取出术
1804	D07儿童骨科、骨盆外科	2021-08-12	2021-08-15	3130480	马陈聖	男	6Y	取除骨折内固定装置		其他	张敬东	易先宏	方明桥	股骨内固定物取出术
1805	D07儿童骨科、骨盆外科	2021-08-11	2021-08-15	3130518	王子涵	男	3Y	取除骨折内固定装置		其他	张敬东	易先宏	王伟	股骨内固定物取出术;瘢痕松解术
1806	D07儿童骨科、骨盆外科	2021-08-14	2021-08-15	3130652	王永耀	男	7Y	肱骨髁上骨折		治愈	张敬东	易先宏	闫广奎	肱骨骨折切开复位钢针内固定术
1807	D07儿童骨科、骨盆外科	2021-08-13	2021-08-16	3130795	黄敬豪	男	4Y	肱骨髁上骨折		治愈	张敬东	易先宏	闫广奎	肱骨骨折闭合复位钢针内固定术
1808	D07儿童骨科、骨盆外科	2021-08-11	2021-08-16	3130796	黄立诚	男	7Y	取除骨折内固定装置		其他	张敬东	李玉安	王伟	尺骨内固定物取出术
1809	D07儿童骨科、骨盆外科	2021-08-13	2021-08-16	3130872	张艺潇	男	5Y	肱骨髁上骨折		治愈	张敬东	易先宏	毛诚晃	肱骨骨折闭合复位钢针内固定术
1810	D07儿童骨科、骨盆外科	2021-08-14	2021-08-16	3130875	周恒权	男	6Y	肱骨髁上骨折		治愈	张敬东	易先宏	闫广奎	肱骨骨折闭合复位钢针内固定术
1811	D07儿童骨科、骨盆外科	2021-08-02	2021-08-16	3130948	金龙	男	38Y	闭合性胫骨平台骨折	脂肪肝;前列腺结石	治愈	孔建中	孔建中	陈墨川	关节软骨修复术;膝关节半月板成形术;胫骨骨折切开复位钢针内固定术
1812	D07儿童骨科、骨盆外科	2021-08-11	2021-08-16	3130954	潘若兮	女	9Y	取除骨折内固定装置		其他	张敬东	易先宏	王伟	股骨内固定物取出术
1813	D07儿童骨科、骨盆外科	2021-07-26	2021-08-16	3130958	温月芝	女	23Y	闭合性胫骨平台骨折	多发性损伤;肾结石;胫腓骨下端骨折;髌骨骨折;肺挫伤;多处挫伤;肺结节	治愈	孔建中	孔建中	陈墨川	胫骨植骨术;胫骨骨折切开复位钢板内固定术;腓骨钢针内固定术
1814	D07儿童骨科、骨盆外科	2021-07-17	2021-08-16	3130964	江徐	男	44Y	开放性胫腓骨干骨折	小腿开放性损伤;下肢皮肤套脱伤;头皮血肿;肺挫伤;液气胸;肋骨骨折	治愈	孔建中	孔建中	陈墨川	皮肤和皮下坏死组织切除清创术;残端修正术;创面负压封闭引流[VSD];经胫骨和腓骨的小腿离断术
1815	D07儿童骨科、骨盆外科	2021-08-07	2021-08-16	3130994	林罗妹	女	53Y	尺骨上端骨折	头皮血肿;特指手术后状态	好转	翁益民	翁益民	柯陈荣	尺骨骨折切开复位钢针内固定术
1816	D07儿童骨科、骨盆外科	2021-08-04	2021-08-16	3131044	伊洪清	男	85Y	股骨粗隆间骨折	老年性痴呆	好转	翁益民	翁益民	柯陈荣	股骨骨折闭合复位钢针内固定术
1817	D07儿童骨科、骨盆外科	2021-08-14	2021-08-16	3131047	程岸	男	14Y	取除骨折内固定装置		其他	翁益民	翁益民	柯陈荣	骨盆内固定物取出术
1818	D07儿童骨科、骨盆外科	2021-07-15	2021-08-17	3131107	张瑞旺	男	71Y	开放性胫腓骨干骨折	多发性脑梗死;老年性脑萎缩;后天性肾囊肿;鞘膜积液;特指趾骨骨折;踝和足浅表损伤;面部软组织挫伤;下肢静脉曲张;多发性损伤;高血压病;痛风	治愈	孔建中	陈墨川	陈墨川	胫骨骨折切开复位钢针内固定术;皮肤和皮下坏死组织切除清创术;创面负压封闭引流[VSD]
1819	D07儿童骨科、骨盆外科	2021-08-16	2021-08-17	3131234	神恺翔	男	6Y	肱骨干骨折		好转	张敬东	易先宏	王伟
1820	D07儿童骨科、骨盆外科	2021-08-10	2021-08-17	3131237	陈子成	男	10Y	尺骨桡骨闭合性骨折	特指手术后状态	治愈	张敬东	闫广奎	王伟	尺骨骨折闭合复位髓内针内固定术
1821	D07儿童骨科、骨盆外科	2021-08-07	2021-08-18	3131505	丰万富	男	4Y	肱骨外科颈骨折	肩胛骨骨折;耻骨骨折;肱骨髁上骨折;肺挫伤	治愈	张敬东	王伟	王伟	肱骨骨折闭合复位钢针内固定术
1822	D07儿童骨科、骨盆外科	2021-08-15	2021-08-18	3131585	刘伟	男	9Y	蒙特贾骨折脱位	前臂桡神经损伤	治愈	张敬东	易先宏	毛诚晃	石膏绷带固定;桡尺关节脱位闭合复位术
1823	D07儿童骨科、骨盆外科	2021-08-15	2021-08-18	3131666	叶佳城	男	13Y	取除骨折内固定装置		其他	张敬东	易先宏	王伟	腓骨内固定物取出术
1824	D07儿童骨科、骨盆外科	2021-08-15	2021-08-18	3131786	谷羽盛	男	2Y	肱骨髁上骨折		治愈	张敬东	易先宏	方明桥	肱骨内固定物取出术
1825	D07儿童骨科、骨盆外科	2021-08-09	2021-08-18	3131787	沈罗英	女	46Y	股骨干骨折	脂肪肝	治愈	孔建中	孔建中	陈墨川	股骨骨折闭合复位钢针内固定术
1826	D07儿童骨科、骨盆外科	2021-08-18	2021-08-18	3131820	段旭	男	4Y	肱骨外髁骨折		未愈	张敬东	易先宏	闫广奎
1827	D07儿童骨科、骨盆外科	2021-08-16	2021-08-19	3131947	金佳慧	女	6Y	取除骨折内固定装置		其他	张敬东	闫广奎	闫广奎	尺骨内固定物取出术
1828	D07儿童骨科、骨盆外科	2021-08-14	2021-08-19	3131956	陈泯桦	女	15Y	取除骨折内固定装置		其他	张敬东	易先宏	方明桥	踝关节内固定物取出术
1829	D07儿童骨科、骨盆外科	2021-08-09	2021-08-19	3131969	孙根荣	男	86Y	取除骨折内固定装置	前列腺结石;下肢动脉粥样硬化	其他	孔建中	孔建中	陈墨川	髌骨内固定物取出术
1830	D07儿童骨科、骨盆外科	2021-08-18	2021-08-20	3132146	郑曦	女	1Y	肱骨髁上骨折		治愈	张敬东	易先宏	方明桥	肱骨骨折闭合复位钢针内固定术
1831	D07儿童骨科、骨盆外科	2021-08-09	2021-08-20	3132231	王定根	男	86Y	股骨粗隆间骨折		好转	翁益民	翁益民	柯陈荣	股骨骨折闭合复位钢针内固定术
1832	D07儿童骨科、骨盆外科	2021-08-16	2021-08-21	3132497	陈梁	男	8Y	取除骨折内固定装置		其他	张敬东	易先宏	毛诚晃	肱骨内固定物取出术
1833	D07儿童骨科、骨盆外科	2021-08-16	2021-08-21	3132499	陈政良	男	9Y	桡骨下端骨折		治愈	张敬东	易先宏	李玉安	桡骨骨折闭合复位钢针内固定术
1834	D07儿童骨科、骨盆外科	2021-08-04	2021-08-21	3132502	温春桃	女	86Y	股骨颈骨折	高血压病;2型糖尿病	好转	翁益民	翁益民	柯陈荣	人工股骨头置换术
1835	D07儿童骨科、骨盆外科	2021-08-10	2021-08-21	3132510	王文光	男	63Y	髌骨骨折	下肢动脉粥样硬化	治愈	孔建中	孔建中	陈墨川	关节软骨修复术;股四头肌成形术;髌骨骨折切开复位螺钉内固定术
1836	D07儿童骨科、骨盆外科	2021-08-16	2021-08-21	3132517	黄晟玮	男	12Y	取除骨折内固定装置		其他	张敬东	易先宏	方明桥	瘢痕松解术;胫骨内固定物取出术
1837	D07儿童骨科、骨盆外科	2021-08-12	2021-08-21	3132520	谢秀花	女	67Y	股骨颈骨折		治愈	孔建中	陈墨川	陈墨川	全髋关节表面置换术;髋关节滑膜切除术
1838	D07儿童骨科、骨盆外科	2021-08-20	2021-08-21	3132797	陈聪	男	25Y	尺骨上端骨折		未愈	翁益民	翁益民	柯陈荣
1839	D07儿童骨科、骨盆外科	2021-08-15	2021-08-22	3132504	戴文轩	男	4Y	肱骨外髁骨折	尺骨桡骨远端骨折;上肢浅表损伤;鹰嘴骨折	治愈	张敬东	闫广奎	王伟	石膏绷带固定;桡骨骨折闭合复位钢针内固定术;肱骨骨折切开复位钢针内固定术
1840	D07儿童骨科、骨盆外科	2021-08-16	2021-08-22	3132902	赵赛萍	女	56Y	取除骨折内固定装置		其他	翁益民	翁益民	柯陈荣	股骨内固定物取出术
1841	D07儿童骨科、骨盆外科	2021-08-16	2021-08-22	3132907	陈慧青	女	20Y	取除骨折内固定装置		其他	翁益民	翁益民	柯陈荣	肱骨内固定物取出术
1842	D07儿童骨科、骨盆外科	2021-08-14	2021-08-22	3132912	余文杰	男	4Y	股骨颈骨折	病理性骨折;骨囊肿	治愈	张敬东	易先宏	闫广奎	股骨骨折闭合复位钢针内固定术;石膏绷带固定
1843	D07儿童骨科、骨盆外科	2021-08-06	2021-08-22	3133085	徐贤云	男	58Y	开放性内踝骨折	踝关节脱位;踝和足韧带破裂;腓骨骨折	治愈	翁益民	翁益民	柯陈荣	创面负压封闭引流[VSD];皮肤和皮下坏死组织切除清创术;踝关节骨折切开复位钢针内固定术
1844	D07儿童骨科、骨盆外科	2021-08-18	2021-08-23	3133326	叶一凡	男	4Y	取除骨折内固定装置		其他	张敬东	易先宏	王伟	尺骨内固定物取出术
1845	D07儿童骨科、骨盆外科	2021-08-02	2021-08-23	3133381	董文准	男	44Y	跟骨骨折		治愈	孔建中	孔建中	陈墨川	跟骨植骨术;跟骨骨折切开复位钢板内固定术;关节软骨修复术;创面负压封闭引流[VSD]
1846	D07儿童骨科、骨盆外科	2021-08-17	2021-08-23	3133389	朱敏	男	41Y	桡骨下端骨折	脂肪肝;前列腺结石;尺骨上端骨折	治愈	孔建中	孔建中	陈墨川	石膏绷带固定;桡骨骨折闭合复位术
1847	D07儿童骨科、骨盆外科	2021-08-16	2021-08-23	3133406	孙国元	男	82Y	股骨粗隆间骨折		治愈	孔建中	陈墨川	陈墨川	股骨骨折闭合复位钢针内固定术
1848	D07儿童骨科、骨盆外科	2021-08-16	2021-08-23	3133408	南依依	女	6Y	股骨颈骨折		好转	张敬东	李玉安	王伟	股骨骨折闭合复位钢针内固定术
1849	D07儿童骨科、骨盆外科	2021-08-18	2021-08-23	3133419	吴冰琳	女	12Y	取除骨折内固定装置		其他	张敬东	易先宏	方明桥	跗骨内固定物取出术
1850	D07儿童骨科、骨盆外科	2021-08-21	2021-08-23	3133421	王泽熙	男	1Y	肱骨髁上骨折		治愈	张敬东	易先宏	方明桥	肱骨骨折闭合复位钢针内固定术
1851	D07儿童骨科、骨盆外科	2021-07-30	2021-08-24	3133643	周美丽	女	52Y	耻骨骨折	面部损伤;髋臼骨折;肋骨骨折;骶骨骨折;胫骨下端骨折;多处浅表损伤;腰椎骨折;跟骨骨折	治愈	孔建中	孔建中	陈墨川	髂骨骨折切开复位钢板内固定术;股骨牵引;骶髂关节固定术;骨盆骨折切开复位钢针内固定术
1852	D07儿童骨科、骨盆外科	2021-08-14	2021-08-24	3133671	黄欣敏	女	7Y	股骨颈骨折	髋部肌肉和肌腱损伤;髋关节积液;足挫伤;多处皮肤破损	好转	张敬东	易先宏	方明桥
1853	D07儿童骨科、骨盆外科	2021-08-18	2021-08-24	3133691	陈蔡子谦	男	2Y	肱骨外髁骨折		治愈	张敬东	闫广奎	王伟	关节软骨修复术;肱骨骨折切开复位钢针内固定术
1854	D07儿童骨科、骨盆外科	2021-08-18	2021-08-25	3134096	潘毅昊	男	5Y	尺骨桡骨闭合性骨折		治愈	张敬东	易先宏	方明桥	尺骨骨折切开复位钢针内固定术;桡骨骨折切开复位髓内针内固定术
1855	D07儿童骨科、骨盆外科	2021-08-08	2021-08-25	3134291	张贵妹	女	67Y	肱骨髁间骨折	面部擦伤	治愈	翁益民	翁益民	柯陈荣	肱骨骨折切开复位钢针内固定术
1856	D07儿童骨科、骨盆外科	2021-08-23	2021-08-25	3134332	符涵铭	男	5Y	取除骨折内固定装置		其他	孔建中	孔建中	陈墨川	尺骨内固定物取出术
1857	D07儿童骨科、骨盆外科	2021-08-01	2021-08-25	3134357	潘步其	男	68Y	跟骨骨折		治愈	孔建中	陈墨川	陈墨川	跟骨骨折切开复位钢板内固定术;关节软骨修复术;跟骨植骨术;创面负压封闭引流[VSD]
1858	D07儿童骨科、骨盆外科	2021-08-21	2021-08-26	3134599	林小丹	女	52Y	骨折内固定装置障碍	特指手术随诊医疗	治愈	翁益民	翁益民	柯陈荣	踝关节骨折切开复位钢针内固定术;踝关节内固定物取出术
1859	D07儿童骨科、骨盆外科	2021-08-25	2021-08-28	3134973	杨斐然	男	2M	肱骨髁上骨折		好转	张敬东	李玉安	闫广奎	肱骨骨折闭合复位钢针内固定术
1860	D07儿童骨科、骨盆外科	2021-08-24	2021-08-28	3134996	朱容成	男	5Y	肱骨髁上骨折		好转	张敬东	李玉安	王伟	肱骨骨折闭合复位钢针内固定术
1861	D07儿童骨科、骨盆外科	2021-08-24	2021-08-28	3135025	杨帆	男	5Y	肱骨髁上骨折		治愈	张敬东	易先宏	方明桥	肱骨骨折闭合复位钢针内固定术
1862	D07儿童骨科、骨盆外科	2021-08-25	2021-08-28	3135027	杨崇朔	男	5Y	肱骨髁上骨折	前臂正中神经损伤;前臂桡动脉损伤	治愈	张敬东	易先宏	方明桥	肱骨骨折闭合复位钢针内固定术
1863	D07儿童骨科、骨盆外科	2021-08-20	2021-08-28	3135037	陈俊廷	男	5Y	开放性尺骨桡骨远端骨折	桡骨下端骨折	治愈	张敬东	毛诚晃	王伟	桡骨骨折闭合复位钢针内固定术;皮肤和皮下坏死组织切除清创术;肌腱、血管、神经探查术
1864	D07儿童骨科、骨盆外科	2021-08-22	2021-08-28	3135062	郑建清	女	41Y	取除骨折内固定装置		其他	翁益民	翁益民	柯陈荣	桡骨内固定物取出术
1865	D07儿童骨科、骨盆外科	2021-08-24	2021-08-28	3135097	韩鑫	女	11Y	取除骨折内固定装置		其他	张敬东	易先宏	李玉安	跗骨内固定物取出术
1866	D07儿童骨科、骨盆外科	2021-08-21	2021-08-28	3135120	曹志宾	男	6Y	肱骨外髁骨折		治愈	孔建中	孔建中	陈墨川	肱骨骨折切开复位钢针内固定术
1867	D07儿童骨科、骨盆外科	2021-08-04	2021-08-28	3135123	赵利平	女	54Y	外踝骨折	特指趾骨骨折;下肢皮肤套脱伤;下肢动脉粥样硬化	治愈	孔建中	孔建中	陈墨川	皮肤和皮下坏死组织切除清创术;创面负压封闭引流[VSD];踝关节骨折切开复位钢针内固定术
1868	D07儿童骨科、骨盆外科	2021-08-17	2021-08-28	3135135	林建仁	男	50Y	髌骨骨折	乙型肝炎小三阳	治愈	孔建中	孔建中	陈墨川	股四头肌成形术;髌骨骨折切开复位螺钉内固定术
1869	D07儿童骨科、骨盆外科	2021-08-17	2021-08-28	3135196	郑冬菊	女	73Y	股骨粗隆间骨折	胆囊结石;下肢动脉粥样硬化	治愈	孔建中	孔建中	陈墨川	股骨骨折闭合复位钢针内固定术
1870	D07儿童骨科、骨盆外科	2021-08-27	2021-08-29	3135420	王远瞰	男	9Y	取除骨折内固定装置		其他	张敬东	易先宏	王伟	桡骨内固定物取出术
1871	D07儿童骨科、骨盆外科	2021-08-22	2021-08-29	3135453	王昌华	男	25Y	取除骨折内固定装置		其他	翁益民	翁益民	柯陈荣	股骨内固定物取出术
1872	D07儿童骨科、骨盆外科	2021-08-22	2021-08-29	3135626	张卫松	男	36Y	取除骨折内固定装置		其他	翁益民	翁益民	柯陈荣	跟骨内固定物取出术
1873	D07儿童骨科、骨盆外科	2021-08-12	2021-08-30	3132537	吴子豪	男	10Y	尺骨桡骨远端骨折	筛窦骨折;脑挫伤;腕关节脱位;前臂正中神经损伤;创伤性蛛网膜下腔出血;创伤性硬膜外出血;颅底骨折;额骨骨折;头皮血肿;颅腔积气;肝损伤;特指手术后状态;贫血	治愈	张敬东	易先宏	王伟	尺骨骨折闭合复位钢针内固定术
1874	D07儿童骨科、骨盆外科	2021-08-21	2021-08-30	3135739	孟从田	女	3Y	肱骨外髁骨折		治愈	张敬东	易先宏	方明桥	肱骨骨折切开复位钢针内固定术
1875	D07儿童骨科、骨盆外科	2021-08-27	2021-08-30	3135751	江祥晨	男	5Y	肱骨髁上骨折		治愈	张敬东	李玉安	方明桥	肱骨骨折闭合复位钢针内固定术
1876	D07儿童骨科、骨盆外科	2021-08-19	2021-08-30	3135753	单建春	男	52Y	髌骨骨折	膝挫伤;高血压病;2型糖尿病;脂肪肝;前列腺增生;前列腺结石	治愈	翁益民	翁益民	柯陈荣	髌骨骨折切开复位螺钉内固定术
1877	D07儿童骨科、骨盆外科	2021-08-17	2021-08-31	3136204	吴肃义	男	50Y	开放性跖骨骨折	足特指部位脱位;开放性足损伤;下肢皮肤撕裂伤;胆囊结石;跖骨脱位	治愈	孔建中	陈墨川	陈墨川	跖关节脱位闭合复位术;跗跖关节融合术;跖骨钢板内固定术
1878	D07儿童骨科、骨盆外科	2021-08-23	2021-09-01	3136557	崔昊天	男	1Y	股骨骨折		好转	张敬东	李玉安	王伟	股骨骨折闭合复位术;石膏绷带固定
1879	D07儿童骨科、骨盆外科	2021-08-28	2021-09-01	3136561	潘迎新	男	9Y	取除骨折内固定装置		其他	张敬东	易先宏	王伟	腓骨内固定物取出术
1880	D07儿童骨科、骨盆外科	2021-08-25	2021-09-01	3136564	刘睿博	男	6Y	肱骨髁上骨折	桡骨下端骨折	治愈	张敬东	李玉安	王伟	肱骨骨折闭合复位钢针内固定术;桡骨骨折闭合复位钢针内固定术
1881	D07儿童骨科、骨盆外科	2021-08-28	2021-09-01	3136568	邵千易	女	4Y	胫骨骨干骨折	胫骨下端骨折;肌腱和肌肉损伤	好转	张敬东	闫广奎	王伟
1882	D07儿童骨科、骨盆外科	2021-08-25	2021-09-01	3136688	林鸾宇	男	26Y	锁骨骨折	肺结核	治愈	孔建中	胡炜	陈墨川	锁骨骨折切开复位钢针内固定术;锁骨植骨术
1883	D07儿童骨科、骨盆外科	2021-08-20	2021-09-01	3136704	李文豪	男	13Y	股骨颈骨折	肺挫伤;肋骨骨折;骶骨骨折;骨盆骨折;盆腔损伤;腹水;特指肾盂积水	治愈	孔建中	胡炜	陈墨川	骨盆骨折切开复位钢针内固定术;股骨骨折闭合复位钢针内固定术
1884	D07儿童骨科、骨盆外科	2021-08-16	2021-09-01	3136808	吴春岳	男	42Y	跟骨骨折		治愈	孔建中	胡炜	陈墨川	创面负压封闭引流[VSD];关节软骨修复术;跟骨植骨术;跟骨骨折切开复位钢板内固定术
1885	D07儿童骨科、骨盆外科	2021-08-31	2021-09-02	3136969	王聪	男	9Y	取除骨折内固定装置		其他	张敬东	李玉安	方明桥	桡骨内固定物取出术
1886	D07儿童骨科、骨盆外科	2021-08-19	2021-09-02	3136988	吕银华	男	44Y	大腿特指肌肉和肌腱损伤	开放性股骨特指部位骨折;开放性膝部损伤	治愈	翁益民	翁益民	柯陈荣	下肢关节囊缝合术;皮肤和皮下坏死组织切除清创术;下肢肌腱缝合术;创面负压封闭引流[VSD]
1887	D07儿童骨科、骨盆外科	2021-08-30	2021-09-02	3136993	李其明	男	73Y	肩胛骨骨折	多处挫伤;肋骨骨折	好转	孔建中	胡炜	陈墨川
1888	D07儿童骨科、骨盆外科	2021-08-27	2021-09-04	3137451	王子铵	男	4Y	胫腓骨下端骨折		治愈	张敬东	李玉安	王伟	石膏绷带固定;胫骨骨折闭合复位螺钉内固定术;腓骨骨折闭合复位术
1889	D07儿童骨科、骨盆外科	2021-08-29	2021-09-04	3137473	叶洵皓	男	11Y	桡骨下端骨折		治愈	张敬东	李玉安	方明桥	桡骨骨折闭合复位钢针内固定术
1890	D07儿童骨科、骨盆外科	2021-08-21	2021-09-04	3137496	朱作银	男	92Y	股骨粗隆间骨折	二尖瓣退行性变;退行性主动脉瓣疾患;后天性肾囊肿;下肢动脉粥样硬化;肺部感染;高血压病;心功能不全	治愈	翁益民	翁益民	柯陈荣	股骨骨折闭合复位钢针内固定术
1891	D07儿童骨科、骨盆外科	2021-08-24	2021-09-04	3137510	梁碎香	女	85Y	肱骨上端骨折	肩袖损伤;膝关节病;后天性肾囊肿;脂肪肝	治愈	孔建中	胡炜	陈墨川	肱骨植骨术;肩袖修补术;肱骨骨折切开复位钢针内固定术
1892	D07儿童骨科、骨盆外科	2021-08-23	2021-09-04	3137526	柳鑫妙	女	6Y	股骨干骨折		治愈	张敬东	毛诚晃	王伟	股骨骨折闭合复位钢针内固定术
1893	D07儿童骨科、骨盆外科	2021-08-23	2021-09-04	3137533	蔡旺程	男	24Y	内踝骨折	跟骨骨折;跖骨骨折	治愈	孔建中	胡炜	陈墨川	跟骨骨折切开复位钢板内固定术;踝关节骨折闭合复位钢针内固定术
1894	D07儿童骨科、骨盆外科	2021-08-24	2021-09-04	3137546	金学祥	男	84Y	股骨粗隆间骨折	肺部感染;肺气肿;胸腔积液;脂肪肝;后天性肾囊肿;下肢动脉粥样硬化;主动脉钙化	治愈	孔建中	胡炜	陈墨川	股骨骨折闭合复位钢针内固定术
1895	D07儿童骨科、骨盆外科	2021-08-19	2021-09-04	3137549	陈国建	男	13Y	特指部位骨折不连接	取除骨折内固定装置	治愈	张敬东	王伟	王伟	股骨髓内针内固定术;股骨内固定物取出术
1896	D07儿童骨科、骨盆外科	2021-08-24	2021-09-05	3137849	陈乃杰	男	48Y	股骨粗隆间骨折	桡骨下端骨折	治愈	孔建中	胡炜	陈墨川	关节软骨修复术;股骨骨折闭合复位钢针内固定术;桡骨骨折切开复位钢针内固定术
1897	D07儿童骨科、骨盆外科	2021-08-25	2021-09-05	3137869	王怡	女	10Y	股骨骨折	继发性血小板减少性紫癜;骨纤维性结构不良(单骨性);骨囊肿;病理性骨折	好转	张敬东	易先宏	王伟
1898	D07儿童骨科、骨盆外科	2021-09-03	2021-09-06	3138264	郭晶晶	女	6Y	肱骨髁上骨折		治愈	孔建中	胡炜	陈墨川	肱骨骨折闭合复位钢针内固定术
1899	D07儿童骨科、骨盆外科	2021-08-25	2021-09-06	3138278	高春兰	女	70Y	股骨颈骨折	高血压病;后天性肾囊肿;下肢动脉粥样硬化	治愈	孔建中	胡炜	陈墨川	髋关节滑膜切除术;全髋关节表面置换术
1900	D07儿童骨科、骨盆外科	2021-08-23	2021-09-06	3138283	仇明朋	男	58Y	闭合性胫骨平台骨折	后天性肾囊肿;下肢动脉粥样硬化;肝硬化;多处挫伤;恶性肿瘤手术后随诊检查	治愈	孔建中	胡炜	陈墨川	胫骨植骨术;膝关节半月板成形术;胫骨骨折切开复位钢针内固定术;关节软骨修复术
1901	D07儿童骨科、骨盆外科	2021-08-25	2021-09-06	3138289	张平	女	53Y	桡骨头骨折	特指手术后状态;尺骨上端骨折;肘关节脱位;前臂特指伸肌和肌腱损伤;创伤性桡侧副韧带破裂;肱骨下端骨折;肝囊肿	治愈	孔建中	胡炜	陈墨川	副韧带修补术;肘关节固定术;尺骨骨折切开复位钢针内固定术;桡骨骨折切开复位钢针内固定术;前臂肌腱缝合术
1902	D07儿童骨科、骨盆外科	2021-09-01	2021-09-07	3138585	胡辰浩	男	7Y	肱骨外髁骨折		治愈	张敬东	李玉安	方明桥	肱骨骨折切开复位钢针内固定术
1903	D07儿童骨科、骨盆外科	2021-09-03	2021-09-07	3138589	雷安琪	女	5Y	肱骨髁上骨折		治愈	张敬东	李玉安	方明桥	肱骨骨折闭合复位钢针内固定术
1904	D07儿童骨科、骨盆外科	2021-08-31	2021-09-07	3138592	张嘉豪	男	6Y	肱骨髁上骨折	肱骨髁间骨折;前臂神经损伤	治愈	张敬东	毛诚晃	王伟	肱骨骨折闭合复位钢针内固定术
1905	D07儿童骨科、骨盆外科	2021-09-03	2021-09-08	3138961	王子轩	女	5Y	肱骨髁上骨折		治愈	张敬东	李玉安	方明桥	肱骨骨折闭合复位钢针内固定术
1906	D07儿童骨科、骨盆外科	2021-09-04	2021-09-08	3138987	吴陈昶	男	1Y	肱骨外髁骨折		治愈	张敬东	王伟	王伟	肱骨骨折切开复位钢针内固定术
1907	D07儿童骨科、骨盆外科	2021-09-06	2021-09-08	3139010	温舟	男	12Y	尺骨下端骨折		好转	张敬东	李玉安	王伟
1908	D07儿童骨科、骨盆外科	2021-09-01	2021-09-08	3139051	林思成	男	13Y	距骨骨折	外踝骨折	治愈	翁益民	翁益民	柯陈荣	距骨骨折切开复位钢针内固定术
1909	D07儿童骨科、骨盆外科	2021-08-13	2021-09-08	3139162	历云弟	女	84Y	股骨髁骨折	特指手术随诊医疗;膝关节屈曲畸形;心功能Ⅲ级;阵发性心房纤颤;血液透析;慢性肾脏病5期;骨质疏松;慢性肾小球肾炎;高血压性心脏病;冠状动脉粥样硬化性心脏病	治愈	翁益民	翁益民	柯陈荣	股骨骨折切开复位钢针内固定术
1910	D07儿童骨科、骨盆外科	2021-07-29	2021-09-08	3139201	江永明	男	43Y	双踝骨折	跖骨骨折;楔状骨骨折(足);骰骨骨折;距骨骨折;跟骨骨折	治愈	翁益民	翁益民	柯陈荣	皮肤和皮下坏死组织切除清创术;踝关节骨折切开复位钢针内固定术;跟骨骨折切开复位钢板内固定术;踝关节骨折闭合复位钢针内固定术;跟骨植骨术
1911	D07儿童骨科、骨盆外科	2021-09-07	2021-09-11	3139870	林明锋	男	9Y	鹰嘴骨折		治愈	张敬东	李玉安	方明桥	尺骨骨折闭合复位钢针内固定术
1912	D07儿童骨科、骨盆外科	2021-09-05	2021-09-11	3139886	吴家乐	男	12Y	鹰嘴骨折		治愈	张敬东	易先宏	方明桥	尺骨骨折切开复位钢针内固定术
1913	D07儿童骨科、骨盆外科	2021-09-07	2021-09-11	3139897	杨博文	男	1Y	距骨骨折	下肢皮肤撕裂伤	好转	张敬东	李玉安	方明桥
1914	D07儿童骨科、骨盆外科	2021-09-06	2021-09-11	3139904	刘金哲	男	4Y	鹰嘴骨折	桡骨颈骨折	治愈	张敬东	李玉安	方明桥	尺骨骨折闭合复位钢针内固定术;桡骨骨折切开复位钢针内固定术
1915	D07儿童骨科、骨盆外科	2021-08-28	2021-09-11	3139915	蒋梓杰	男	11Y	股骨颈骨折	浅表损伤	治愈	张敬东	易先宏	王伟	股骨骨折闭合复位钢针内固定术
1916	D07儿童骨科、骨盆外科	2021-08-31	2021-09-11	3140005	周岩宣	男	64Y	股骨粗隆间骨折	桡骨下端骨折;下肢动脉粥样硬化;肝病;肝囊肿;胆囊结石;前列腺增生	治愈	孔建中	胡炜	陈墨川	股骨骨折闭合复位钢针内固定术
1917	D07儿童骨科、骨盆外科	2021-09-03	2021-09-11	3140008	陈玲燕	女	25Y	肱骨干骨折	前臂桡神经损伤	治愈	孔建中	胡炜	陈墨川	肱骨骨折切开复位钢针内固定术
1918	D07儿童骨科、骨盆外科	2021-09-01	2021-09-11	3140009	余玲瑛	女	81Y	股骨粗隆间骨折	高血压病;下肢动脉粥样硬化;胫前动脉狭窄;心包积液	治愈	孔建中	胡炜	陈墨川	股骨骨折闭合复位钢针内固定术
1919	D07儿童骨科、骨盆外科	2021-09-07	2021-09-11	3140013	熊兴富	男	13Y	胫骨下端骨折		治愈	张敬东	李玉安	王伟	胫骨骨折闭合复位螺钉内固定术
1920	D07儿童骨科、骨盆外科	2021-08-31	2021-09-11	3140050	黄月华	女	85Y	股骨粗隆间骨折	面部软组织挫伤;陈旧性肺结核;老年性痴呆;腔隙性脑梗死;支气管扩张;后天性肾囊肿;下肢动脉粥样硬化;老年性脑萎缩;肺不张	治愈	翁益民	翁益民	柯陈荣	股骨骨折闭合复位钢针内固定术
1921	D07儿童骨科、骨盆外科	2021-09-01	2021-09-12	3140171	陶梦佳	女	5Y	股骨干骨折	多处浅表损伤	治愈	张敬东	易先宏	王伟	股骨骨折闭合复位钢针内固定术
1922	D07儿童骨科、骨盆外科	2021-09-06	2021-09-12	3140207	周子涵	男	5Y	肱骨外髁骨折		治愈	张敬东	李玉安	方明桥	肱骨骨折切开复位钢针内固定术
1923	D07儿童骨科、骨盆外科	2021-08-29	2021-09-12	3140357	王会迪	男	58Y	取除骨折内固定装置	前列腺结石	其他	翁益民	翁益民	柯陈荣	胫骨内固定物取出术
1924	D07儿童骨科、骨盆外科	2021-08-21	2021-09-13	3140551	苏思颖	女	2Y	开放性胫腓骨干骨折	手术后切口感染;坏疽;下肢肌腱损伤;下肢浅表损伤	治愈	张敬东	易先宏	王伟	皮肤和皮下坏死组织切除清创术;下肢肌腱缝合术;胫骨外固定架固定术;创面负压封闭引流[VSD]
1925	D07儿童骨科、骨盆外科	2021-07-24	2021-09-13	3140605	潘群燕	女	37Y	胫骨骨折累及踝关节	骰骨骨折;多处浅表损伤;面部裂伤;跖骨骨折;耻骨骨折;股骨髁骨折;骶骨骨折;髂骨骨折;皮下血肿;下肢皮肤撕裂伤	治愈	孔建中	胡炜	陈墨川	皮肤和皮下坏死组织切除清创术;创面负压封闭引流[VSD];关节软骨修复术;同种皮肤移植术;胫骨骨折切开复位钢板内固定术
1926	D07儿童骨科、骨盆外科	2021-09-08	2021-09-13	3140606	郑博元	男	6Y	肱骨髁上骨折		治愈	张敬东	李玉安	方明桥	肱骨骨折闭合复位钢针内固定术
1927	D07儿童骨科、骨盆外科	2021-09-08	2021-09-13	3140612	赵仪	男	9Y	肱骨外髁骨折		治愈	张敬东	李玉安	方明桥	肱骨骨折闭合复位钢针内固定术
1928	D07儿童骨科、骨盆外科	2021-09-04	2021-09-13	3140616	陈和平	女	52Y	外踝骨折	胫腓骨下端骨折	治愈	孔建中	胡炜	陈墨川	踝关节骨折切开复位钢板内固定术;胫骨植骨术;胫骨骨折切开复位钢板内固定术
1929	D07儿童骨科、骨盆外科	2021-09-10	2021-09-14	3140901	罗宇杰	男	3Y	指骨骨折	手指挤压伤	治愈	张敬东	李玉安	王伟	甲成形术;皮肤和皮下坏死组织切除清创术;指骨骨折闭合复位术
1930	D07儿童骨科、骨盆外科	2021-09-11	2021-09-14	3140914	林静媛	女	1Y	肱骨髁上骨折		治愈	张敬东	李玉安	方明桥	肱骨骨折闭合复位钢针内固定术
1931	D07儿童骨科、骨盆外科	2021-09-04	2021-09-14	3140924	李靖桐	男	5Y	特指骨囊肿	肱骨骨折;病理性骨折	治愈	张敬东	易先宏	王伟	肱骨骨折切开复位髓内针内固定术;肱骨病损切除术
1932	D07儿童骨科、骨盆外科	2021-09-09	2021-09-14	3140949	田晨雨	男	8Y	肱骨外髁骨折		治愈	易先宏	李玉安	王伟	肱骨骨折切开复位钢针内固定术
1933	D07儿童骨科、骨盆外科	2021-09-07	2021-09-15	3141324	方跃呈	男	47Y	取除骨折内固定装置	肾结石;前列腺结石	其他	孔建中	胡炜	陈墨川	桡骨内固定物取出术
1934	D07儿童骨科、骨盆外科	2021-09-13	2021-09-15	3141330	项钧浩	男	1Y	肱骨髁上骨折	肱骨下端骨折	治愈	张敬东	易先宏	方明桥	肱骨骨折闭合复位钢针内固定术
1935	D07儿童骨科、骨盆外科	2021-09-07	2021-09-15	3141404	黄菁菁	女	22Y	锁骨骨折	肾结石	治愈	孔建中	胡炜	陈墨川	锁骨骨折切开复位钢板内固定术
1936	D07儿童骨科、骨盆外科	2021-09-14	2021-09-16	3141664	李承睿	男	3Y	肱骨髁上骨折		治愈	张敬东	李玉安	方明桥	肱骨骨折闭合复位钢针内固定术
1937	D07儿童骨科、骨盆外科	2021-08-23	2021-09-16	3141679	卢佳乐	男	7Y	股骨骨折		治愈	张敬东	易先宏	毛诚晃	股骨骨折闭合复位钢针内固定术
1938	D07儿童骨科、骨盆外科	2021-09-12	2021-09-18	3142137	肖崇豪	男	7Y	尺骨桡骨远端骨折		治愈	张敬东	易先宏	闫广奎	桡骨骨折闭合复位钢针内固定术
1939	D07儿童骨科、骨盆外科	2021-09-13	2021-09-18	3142140	郑怡欣	女	6Y	肱骨髁上骨折		治愈	张敬东	易先宏	方明桥	肱骨骨折闭合复位钢针内固定术
1940	D07儿童骨科、骨盆外科	2021-09-12	2021-09-18	3142146	李菲菲	女	76Y	取除骨折内固定装置	特指手术随诊医疗;下肢动脉粥样硬化;单纯性肾囊肿	其他	翁益民	翁益民	柯陈荣	瘢痕松解术;肱骨内固定物取出术
1941	D07儿童骨科、骨盆外科	2021-09-14	2021-09-18	3142170	张博	男	3Y	取除骨折内固定装置		其他	张敬东	易先宏	闫广奎	胫骨内固定物取出术
1942	D07儿童骨科、骨盆外科	2021-09-14	2021-09-18	3142171	毛林涛	男	11Y	肱骨内髁骨折		治愈	张敬东	易先宏	闫广奎	肱骨骨折切开复位钢针内固定术
1943	D07儿童骨科、骨盆外科	2021-08-31	2021-09-18	3142203	胡小柳	女	55Y	跟骨骨折	高血压病	治愈	孔建中	胡炜	陈墨川	跟骨植骨术;关节软骨修复术;跟骨骨折切开复位钢板内固定术
1944	D07儿童骨科、骨盆外科	2021-08-31	2021-09-18	3142206	徐珏芬	女	67Y	三踝骨折	退行性主动脉瓣疾患;下肢动脉粥样硬化;二尖瓣返流	治愈	翁益民	翁益民	柯陈荣	踝关节骨折切开复位钢针内固定术
1945	D07儿童骨科、骨盆外科	2021-08-30	2021-09-18	3142311	胡康如	男	63Y	髋臼骨折	骨盆骨折;肾结石	治愈	孔建中	胡炜	陈墨川	骨盆骨折切开复位钢板内固定术;髂骨骨折切开复位钢板内固定术
1946	D07儿童骨科、骨盆外科	2021-09-18	2021-09-19	3142431	叶香翠	女	85Y	股骨颈骨折	高血压病	未愈	翁益民	翁益民	柯陈荣
1947	D07儿童骨科、骨盆外科	2021-09-01	2021-09-19	3142567	吴雨彤	女	6Y	胫骨下端骨折	肺挫伤	好转	张敬东	易先宏	毛诚晃
1948	D07儿童骨科、骨盆外科	2021-09-11	2021-09-19	3142595	李绍求	男	34Y	锁骨骨折	前列腺结石	治愈	孔建中	胡炜	陈墨川	锁骨植骨术;锁骨骨折切开复位钢针内固定术
1949	D07儿童骨科、骨盆外科	2021-09-12	2021-09-19	3142611	毛智宸	男	2Y	股骨干骨折	肘关节扭伤;多处浅表损伤	治愈	张敬东	易先宏	方明桥	股骨骨折闭合复位钢针内固定术
1950	D07儿童骨科、骨盆外科	2021-09-15	2021-09-19	3142615	郑云馨	女	11M	肱骨下端骨折		治愈	张敬东	易先宏	毛诚晃	肱骨骨折闭合复位钢针内固定术
1951	D07儿童骨科、骨盆外科	2021-09-04	2021-09-19	3142616	朱碎庭	男	59Y	胫腓骨闭合性骨折	2型糖尿病	治愈	翁益民	翁益民	柯陈荣	腓骨骨折切开复位髓内针内固定术;胫骨骨折切开复位钢板内固定术
1952	D07儿童骨科、骨盆外科	2021-09-10	2021-09-20	3142953	刘校呈	男	3Y	胫骨骨折	多处浅表损伤	治愈	张敬东	易先宏	毛诚晃
1953	D07儿童骨科、骨盆外科	2021-09-15	2021-09-20	3142964	黄子元	男	12Y	尺骨桡骨闭合性骨折		治愈	张敬东	易先宏	闫广奎	尺骨骨折闭合复位髓内针内固定术
1954	D07儿童骨科、骨盆外科	2021-09-06	2021-09-20	3143104	谢美娟	女	53Y	桡骨下端骨折	尺骨茎突骨折	治愈	孔建中	胡炜	陈墨川	桡骨骨折切开复位钢针内固定术
1955	D07儿童骨科、骨盆外科	2021-08-29	2021-09-21	3143219	陈新良	男	66Y	胸椎骨折	胫腓骨闭合性骨折;颅腔积气;腰椎骨折;肋骨骨折;跖骨骨折;肺挫伤;创伤性胸腔积液;颞骨骨折;脑挫伤;头皮血肿;头皮异物	治愈	孔建中	胡炜	陈墨川	腓骨骨折闭合复位髓内针内固定术;胫骨骨折闭合复位螺钉内固定术;后入路胸椎融合术;椎弓根钉内固定术
1956	D07儿童骨科、骨盆外科	2021-09-01	2021-09-21	3143264	蔡华香	女	47Y	髂骨骨折	多发性损伤;耻骨骨折;膝外侧半月板损伤;四头肌和肌腱损伤;小腿特指浅表损伤;特指骨软骨病;膝关节积液;子宫纵隔;子宫肥大;子宫内膜息肉	治愈	翁益民	翁益民	柯陈荣	髂骨骨折切开复位钢针内固定术
1957	D07儿童骨科、骨盆外科	2021-09-19	2021-09-21	3143290	陈煜博	男	5Y	肱骨髁上骨折		治愈	张敬东	李玉安	闫广奎	肱骨骨折闭合复位钢针内固定术
1958	D07儿童骨科、骨盆外科	2021-09-17	2021-09-21	3143301	丁祖攀	男	6Y	肱骨外髁骨折		治愈	张敬东	李玉安	闫广奎	肱骨骨折闭合复位钢针内固定术
1959	D07儿童骨科、骨盆外科	2021-09-18	2021-09-21	3143336	龚亚昕	女	6Y	肱骨髁上骨折		治愈	张敬东	李玉安	毛诚晃	肱骨骨折闭合复位钢针内固定术
1960	D07儿童骨科、骨盆外科	2021-08-16	2021-09-21	3143470	叶圣和	男	53Y	跖骨骨折	足舟骨脱位;脂肪肝;单纯性肾囊肿;楔状骨骨折(足);跖骨脱位;上肢浅表损伤	治愈	孔建中	胡炜	陈墨川	创面负压封闭引流[VSD];皮肤和皮下坏死组织切除清创术;跖骨骨折闭合复位钢针内固定术;跗跖关节脱位切开复位术;跖关节脱位闭合复位术
1961	D07儿童骨科、骨盆外科	2021-09-01	2021-09-22	3143645	柯春连	女	70Y	股骨髁骨折	骨质疏松;高血压病;2型糖尿病;下肢动脉粥样硬化;脂肪肝;特指手术后状态	治愈	翁益民	翁益民	柯陈荣	股骨骨折切开复位钢针内固定术
1962	D07儿童骨科、骨盆外科	2021-09-11	2021-09-22	3143680	徐执斌	男	46Y	股骨粗隆间骨折	2型糖尿病	治愈	孔建中	胡炜	陈墨川	股骨骨折闭合复位钢针内固定术
1963	D07儿童骨科、骨盆外科	2021-09-19	2021-09-22	3143686	曾坷坷	女	7Y	肱骨髁上骨折	正中神经损害;尺骨桡骨远端骨折	治愈	张敬东	李玉安	毛诚晃	桡骨骨折闭合复位钢针内固定术;肱骨骨折闭合复位钢针内固定术
1964	D07儿童骨科、骨盆外科	2021-09-17	2021-09-22	3143692	黄仁淼	男	11Y	内踝骨折		治愈	张敬东	李玉安	方明桥	踝关节骨折闭合复位钢针内固定术
1965	D07儿童骨科、骨盆外科	2021-09-18	2021-09-22	3143693	金姿翰	女	6Y	特指趾骨骨折		治愈	张敬东	李玉安	毛诚晃	趾骨骨折闭合复位钢针内固定术
1966	D07儿童骨科、骨盆外科	2021-09-18	2021-09-22	3143705	吴梓俊	男	4Y	肱骨外髁骨折		治愈	张敬东	易先宏	方明桥	肱骨骨折切开复位钢针内固定术
1967	D07儿童骨科、骨盆外科	2021-09-07	2021-09-22	3143721	黄爱香	女	71Y	肱骨髁间骨折	肝胆管扩张;脂肪肝;慢性乙型病毒性肝炎;膝关节脱位;高血压病;2型糖尿病;跖骨骨折;外踝骨折;下肢动脉粥样硬化	治愈	孔建中	胡炜	陈墨川	股骨植骨术;关节软骨修复术;股骨骨折切开复位钢针内固定术
1968	D07儿童骨科、骨盆外科	2021-09-20	2021-09-22	3143788	王怡然	女	3Y	肱骨髁上骨折		治愈	张敬东	李玉安	闫广奎	肱骨骨折闭合复位钢针内固定术
1969	D07儿童骨科、骨盆外科	2021-09-14	2021-09-22	3143894	王荷莲	女	81Y	股骨干骨折	插入矫形外科植入物后骨折;高血压病;心房颤动;脑梗死;特指手术随诊医疗;老年性脑萎缩;肝囊肿;脾囊肿;单纯性肾囊肿;下肢动脉粥样硬化;脑白质病	治愈	翁益民	翁益民	柯陈荣	股骨内固定物取出术;股骨骨折切开复位髓内针内固定术
1970	D07儿童骨科、骨盆外科	2021-09-13	2021-09-23	3144203	杨秀奎	男	21Y	创伤后趾骨坏死	下肢皮肤感染;特指趾骨骨折	治愈	孔建中	胡炜	陈墨川	趾离断术
1971	D07儿童骨科、骨盆外科	2021-09-14	2021-09-25	3144497	唐志斌	男	31Y	三踝骨折		治愈	孔建中	孔建中	陈墨川	关节软骨修复术;踝关节脱位切开复位术;踝关节骨折切开复位钢板内固定术
1972	D07儿童骨科、骨盆外科	2021-09-20	2021-09-25	3144502	金城郅	男	7Y	肱骨髁上骨折		治愈	张敬东	易先宏	毛诚晃	肱骨骨折闭合复位钢针内固定术
1973	D07儿童骨科、骨盆外科	2021-09-23	2021-09-25	3144507	翟若眩	男	2Y	肱骨髁上骨折	上肢撕脱伤	治愈	张敬东	李玉安	方明桥	肱骨骨折闭合复位钢针内固定术
1974	D07儿童骨科、骨盆外科	2021-09-20	2021-09-25	3144513	李如静	女	6Y	肱骨髁上骨折		治愈	张敬东	李玉安	毛诚晃	肱骨骨折闭合复位钢针内固定术
1975	D07儿童骨科、骨盆外科	2021-09-20	2021-09-25	3144517	徐雪花	女	55Y	外踝骨折	高血压病;小腿水平多发性肌腱损伤	治愈	孔建中	孔建中	陈墨川	踝关节融合术;踝关节骨折切开复位钢板内固定术
1976	D07儿童骨科、骨盆外科	2021-09-06	2021-09-25	3144523	蔡书娟	女	38Y	经大转子骨折	多发性损伤;特指手术后状态;髋关节积液	治愈	翁益民	翁益民	柯陈荣	股骨骨折切开复位钢针内固定术
1977	D07儿童骨科、骨盆外科	2021-09-17	2021-09-25	3144526	刘彬宇	男	5Y	股骨干骨折	创伤性硬膜下出血;颞骨骨折;皮下血肿	治愈	张敬东	李玉安	毛诚晃	股骨骨折切开复位钢针内固定术
1978	D07儿童骨科、骨盆外科	2021-09-19	2021-09-25	3144530	陈荣雷	男	41Y	内踝骨折		治愈	孔建中	孔建中	陈墨川	踝关节骨折切开复位钢针内固定术
1979	D07儿童骨科、骨盆外科	2021-09-20	2021-09-25	3144534	林哲彬	男	46Y	内踝骨折	特指手术后状态;多处浅表损伤;脂肪肝;前列腺结石	治愈	孔建中	孔建中	陈墨川	踝关节骨折切开复位钢针内固定术
1980	D07儿童骨科、骨盆外科	2021-09-07	2021-09-25	3144565	郁金生	男	40Y	胫骨骨折累及踝关节	特指手术后状态;肝钙化灶;腓骨骨折	治愈	孔建中	孔建中	陈墨川	胫骨骨折切开复位钢板内固定术;跟骨结节牵引;腓骨骨折切开复位钢板内固定术;踝关节骨折切开复位钢针内固定术
1981	D07儿童骨科、骨盆外科	2021-09-20	2021-09-25	3144619	谢思慧	女	6Y	肱骨髁上骨折	前臂神经损伤	治愈	张敬东	李玉安	毛诚晃	肱骨骨折闭合复位钢针内固定术
1982	D07儿童骨科、骨盆外科	2021-09-15	2021-09-25	3144750	缪桂萍	女	2Y	股骨骨折	锁骨骨折;肱骨骨折	治愈	张敬东	闫广奎	毛诚晃	股骨骨折闭合复位钢针内固定术
1983	D07儿童骨科、骨盆外科	2021-09-17	2021-09-25	3144795	王彰韩	男	13Y	股骨髁骨折	膝关节软骨撕裂，近期的;膝关节十字韧带扭伤;髌骨骨折	治愈	孔建中	孔建中	陈墨川	股骨骨折切开复位钢针内固定术;股骨植骨术;关节软骨修复术;髌骨骨折切开复位螺钉内固定术
1984	D07儿童骨科、骨盆外科	2021-09-22	2021-09-26	3145003	南熙雯	女	1Y	股骨骨折		好转	张敬东	李玉安	闫广奎	石膏绷带固定;股骨骨折闭合复位术
1985	D07儿童骨科、骨盆外科	2021-09-22	2021-09-26	3145009	苏慕橙	女	4Y	肱骨外髁骨折		治愈	张敬东	闫广奎	毛诚晃	肱骨骨折闭合复位钢针内固定术
1986	D07儿童骨科、骨盆外科	2021-09-19	2021-09-26	3145024	王皓然	男	2Y	肱骨髁上骨折	尺骨桡骨闭合性骨折	治愈	张敬东	李玉安	毛诚晃	肱骨骨折切开复位钢针内固定术
1987	D07儿童骨科、骨盆外科	2021-09-24	2021-09-26	3145036	林依然	女	1Y	肱骨髁上骨折		治愈	张敬东	李玉安	方明桥	肱骨骨折闭合复位钢针内固定术
1988	D07儿童骨科、骨盆外科	2021-09-23	2021-09-26	3145042	谢欣怡	女	14Y	取除骨折内固定装置		其他	张敬东	易先宏	闫广奎	肱骨内固定物取出术
1989	D07儿童骨科、骨盆外科	2021-09-06	2021-09-26	3145055	梁大忠	男	55Y	股骨骨折	开放性胫骨上端骨折;拇指骨折;特指手术后状态;创伤性硬膜外出血;创伤性蛛网膜下腔出血;颅腔积气;颅骨骨折;鼻骨骨折;视神经损伤;髌骨骨折	治愈	孔建中	胡炜	陈墨川	指骨骨折闭合复位术;胫骨骨折切开复位钢针内固定术;股骨骨折切开复位钢针内固定术;皮肤和皮下坏死组织切除清创术;股骨外固定架固定术
1990	D07儿童骨科、骨盆外科	2021-08-30	2021-09-26	3145059	杨锋	男	30Y	开放性胫腓骨干骨折	脂肪肝;特指手术后状态	治愈	孔建中	胡炜	陈墨川	水泥间隔物置入术;腓骨骨折闭合复位髓内针内固定术;胫骨骨折切开复位钢板内固定术;创面负压封闭引流[VSD]
1991	D07儿童骨科、骨盆外科	2021-09-23	2021-09-27	3145263	李珊珊	女	6Y	肱骨髁上骨折		治愈	张敬东	易先宏	毛诚晃	肱骨骨折闭合复位钢针内固定术
1992	D07儿童骨科、骨盆外科	2021-09-23	2021-09-27	3145486	章渊朝	男	11Y	尺骨桡骨闭合性骨折		治愈	张敬东	易先宏	毛诚晃	桡骨骨折闭合复位钢针内固定术
1993	D07儿童骨科、骨盆外科	2021-09-20	2021-09-28	3145677	梁芝珍	女	3Y	股骨骨折	特指手术后状态;肺挫伤	治愈	张敬东	李玉安	闫广奎	股骨骨折闭合复位钢针内固定术
1994	D07儿童骨科、骨盆外科	2021-09-26	2021-09-28	3145678	刘衍序	男	2Y	肱骨髁上骨折		治愈	张敬东	李玉安	毛诚晃	肱骨骨折闭合复位钢针内固定术
1995	D07儿童骨科、骨盆外科	2021-09-23	2021-09-29	3146206	郑秀花	女	58Y	锁骨骨折	肋骨骨折	治愈	孔建中	胡炜	陈墨川	锁骨骨折切开复位钢针内固定术;锁骨植骨术
1996	D07儿童骨科、骨盆外科	2021-09-18	2021-09-29	3146356	厉景玉	男	75Y	股骨颈骨折	主动脉钙化;完全性右束支传导阻滞;前列腺结石;特指手术后状态;下肢动脉粥样硬化;前列腺增生	治愈	孔建中	胡炜	陈墨川	全髋关节表面置换术;髋关节滑膜切除术
1997	D07儿童骨科、骨盆外科	2021-09-23	2021-09-29	3146357	薛光云	男	58Y	股骨颈骨折	下肢动脉粥样硬化;高血压病;后天性肾囊肿;下肢静脉血栓形成	治愈	孔建中	胡炜	陈墨川	股骨骨折闭合复位钢针内固定术
1998	D07儿童骨科、骨盆外科	2021-09-17	2021-09-30	3146560	杨凯伦	男	5Y	胫腓骨干骨折		治愈	张敬东	李玉安	毛诚晃	胫骨骨折闭合复位髓内针内固定术
[truncated: 10,780 more rows]
